# Supplementary material
Source: PubMed Central journal article supplement (PMC4368445)
Supplement: NIHMS581450-supplement-01.pdf [file NIHMS581450-supplement-01.pdf]

| Modification | Fold change | p-value |
|--------------|-------------|---------|
| H3K27me3     | 1.2         | 0.558   |
| H4K20me3     | 0.9         | 0.821   |
| H3K9ac       | 0.64        | 0.388   |
| H3K18ac      | 1.32        | 0.755   |
| H3K4me3      | 1.07        | 0.975   |

## Gene List WT H3K14ac Control Diet

| chromoson | feature sta | feature enc | feature  | chromosome | region start | region end |
|-----------|-------------|-------------|----------|------------|--------------|------------|
| 1         | 1.95E+08    | 1.95E+08    | NM_00805 | chr1       | 194977910    | 194978505  |
| 1         | 1.95E+08    | 1.95E+08    | NM_00828 | chr1       | 194964920    | 194965420  |
| 1         | 1.94E+08    | 1.94E+08    | NM_02372 | chr1       | 193674735    | 193675795  |
| 1         | 1.93E+08    | 1.93E+08    | BC058403 | chr1       | 192540153    | 192540610  |
| 1         | 1.91E+08    | 1.91E+08    | BC056167 | chr1       | 190978197    | 190979576  |
| 1         | 1.9E+08     | 1.9E+08     | NM_01193 | chr1       | 189696142    | 189696864  |
| 1         | 1.89E+08    | 1.89E+08    | NM_03307 | chr1       | 188657816    | 188658492  |
| 1         | 1.87E+08    | 1.87E+08    | NM_19865 | chr1       | 187032314    | 187033135  |
| 1         | 1.87E+08    | 1.87E+08    | BC028441 | chr1       | 186515046    | 186516940  |
| 1         | 1.82E+08    | 1.82E+08    | BC120654 | chr1       | 182324168    | 182325418  |
| 1         | 1.82E+08    | 1.82E+08    | NM_19947 | chr1       | 182171231    | 182171862  |
| 2         | 1.82E+08    | 1.82E+08    | NM_01101 | chr2       | 181646447    | 181647113  |
| 2         | 1.82E+08    | 1.82E+08    | NM_01101 | chr2       | 181638441    | 181638816  |
| 2         | 1.81E+08    | 1.81E+08    | BC052532 | chr2       | 181166842    | 181167310  |
| 2         | 1.81E+08    | 1.81E+08    | BC052532 | chr2       | 181160554    | 181161142  |
| 2         | 1.81E+08    | 1.81E+08    | BC016112 | chr2       | 180940276    | 180941173  |
| 2         | 1.8E+08     | 1.8E+08     | NM_01876 | chr2       | 180430180    | 180430777  |
| 2         | 1.8E+08     | 1.8E+08     | NM_01876 | chr2       | 180428267    | 180429087  |
| 2         | 1.8E+08     | 1.8E+08     | NM_14893 | chr2       | 180389539    | 180390296  |
| 2         | 1.8E+08     | 1.8E+08     | NM_17303 | chr2       | 180218465    | 180219236  |
| 1         | 1.8E+08     | 1.8E+08     | NM_02707 | chr1       | 179565888    | 179566623  |
| 1         | 1.77E+08    | 1.77E+08    | NM_01020 | chr1       | 177468232    | 177468918  |
| 1         | 1.77E+08    | 1.77E+08    | NM_13380 | chr1       | 177468232    | 177468918  |
| 1         | 1.76E+08    | 1.76E+08    | NM_14676 | chr1       | 176267579    | 176268283  |
| 1         | 1.76E+08    | 1.76E+08    | NM_14671 | chr1       | 175882172    | 175882815  |
| 1         | 1.76E+08    | 1.76E+08    | NM_14671 | chr1       | 175876552    | 175877241  |
| 1         | 1.75E+08    | 1.75E+08    | NM_00101 | chr1       | 175294669    | 175295259  |
| 1         | 1.75E+08    | 1.75E+08    | NM_05319 | chr1       | 175206781    | 175207929  |
| 1         | 1.75E+08    | 1.75E+08    | BC029659 | chr1       | 175180604    | 175181426  |
| 1         | 1.75E+08    | 1.75E+08    | NM_01004 | chr1       | 175174401    | 175175026  |
| 1         | 1.75E+08    | 1.75E+08    | NM_01004 | chr1       | 175172638    | 175173309  |
| 1         | 1.75E+08    | 1.75E+08    | NM_01018 | chr1       | 175066306    | 175066866  |
| 1         | 1.75E+08    | 1.75E+08    | NM_01018 | chr1       | 175062970    | 175063637  |
| 1         | 1.75E+08    | 1.75E+08    | NM_00876 | chr1       | 174793089    | 174793753  |
| 1         | 1.75E+08    | 1.75E+08    | NM_01131 | chr1       | 174729385    | 174730060  |
| 1         | 1.74E+08    | 1.74E+08    | NM_17859 | chr1       | 174341525    | 174342118  |
| 2         | 1.74E+08    | 1.74E+08    | NM_02553 | chr2       | 174120073    | 174120671  |
| 1         | 1.74E+08    | 1.74E+08    | NM_01106 | chr1       | 174042982    | 174043702  |
| 2         | 1.74E+08    | 1.74E+08    | NM_17267 | chr2       | 173715270    | 173715854  |
| 1         | 1.73E+08    | 1.73E+08    | NM_14453 | chr1       | 173495221    | 173495665  |
| 1         | 1.73E+08    | 1.73E+08    | NM_00100 | chr1       | 173225159    | 173225752  |
| 1         | 1.73E+08    | 1.73E+08    | NM_00100 | chr1       | 173221293    | 173222254  |
| 1         | 1.73E+08    | 1.73E+08    | NM_02789 | chr1       | 173206980    | 173207619  |
| 2         | 1.73E+08    | 1.73E+08    | BC050790 | chr2       | 173166757    | 173167392  |

|   |          |          |          |      |           |           |
|---|----------|----------|----------|------|-----------|-----------|
| 1 | 1.73E+08 | 1.73E+08 | NM_01391 | chr1 | 173121654 | 173122257 |
| 1 | 1.73E+08 | 1.73E+08 | AY304481 | chr1 | 173031015 | 173031529 |
| 2 | 1.73E+08 | 1.73E+08 | NM_02139 | chr2 | 172866466 | 172867059 |
| 2 | 1.73E+08 | 1.73E+08 | NM_01204 | chr2 | 172623132 | 172623759 |
| 2 | 1.73E+08 | 1.73E+08 | NM_01204 | chr2 | 172620714 | 172621333 |
| 2 | 1.72E+08 | 1.72E+08 | BC024393 | chr2 | 172204438 | 172205011 |
| 1 | 1.72E+08 | 1.72E+08 | NM_02256 | chr1 | 171950586 | 171951170 |
| 1 | 1.72E+08 | 1.72E+08 | BC005656 | chr1 | 171530278 | 171531146 |
| 1 | 1.71E+08 | 1.71E+08 | NM_02328 | chr1 | 171370263 | 171371038 |
| 1 | 1.69E+08 | 1.69E+08 | NM_02556 | chr1 | 169232005 | 169232598 |
| 2 | 1.67E+08 | 1.67E+08 | NM_00896 | chr2 | 166936770 | 166937400 |
| 2 | 1.67E+08 | 1.67E+08 | NM_00896 | chr2 | 166929154 | 166929766 |
| 2 | 1.66E+08 | 1.66E+08 | NM_02807 | chr2 | 165848758 | 165849355 |
| 2 | 1.66E+08 | 1.66E+08 | AY101177 | chr2 | 165823775 | 165824371 |
| 2 | 1.65E+08 | 1.65E+08 | BC012446 | chr2 | 165481137 | 165481724 |
| 2 | 1.65E+08 | 1.65E+08 | U71208   | chr2 | 165317602 | 165318308 |
| 2 | 1.65E+08 | 1.65E+08 | NM_17070 | chr2 | 164747196 | 164747947 |
| 1 | 1.64E+08 | 1.64E+08 | NM_01086 | chr1 | 164475074 | 164475889 |
| 2 | 1.64E+08 | 1.64E+08 | NM_00101 | chr2 | 164333905 | 164334589 |
| 2 | 1.64E+08 | 1.64E+08 | NM_00101 | chr2 | 164304965 | 164305569 |
| 2 | 1.64E+08 | 1.64E+08 | AY757956 | chr2 | 164304965 | 164305569 |
| 2 | 1.64E+08 | 1.64E+08 | NM_00103 | chr2 | 164280815 | 164281677 |
| 2 | 1.64E+08 | 1.64E+08 | NM_00903 | chr2 | 164089036 | 164089626 |
| 2 | 1.64E+08 | 1.64E+08 | NM_00930 | chr2 | 164025343 | 164026463 |
| 2 | 1.64E+08 | 1.64E+08 | NM_02136 | chr2 | 163979144 | 163979780 |
| 2 | 1.64E+08 | 1.64E+08 | NM_01739 | chr2 | 163930375 | 163931367 |
| 2 | 1.64E+08 | 1.64E+08 | NM_01875 | chr2 | 163686266 | 163687771 |
| 1 | 1.64E+08 | 1.64E+08 | BC057865 | chr1 | 163568156 | 163568754 |
| 1 | 1.64E+08 | 1.64E+08 | BC057865 | chr1 | 163562768 | 163563637 |
| 2 | 1.64E+08 | 1.64E+08 | NM_01687 | chr2 | 163508799 | 163509481 |
| 2 | 1.63E+08 | 1.63E+08 | NM_01110 | chr2 | 163381963 | 163382816 |
| 2 | 1.63E+08 | 1.63E+08 | NM_01110 | chr2 | 163381043 | 163381668 |
| X | 1.62E+08 | 1.62E+08 | NM_01939 | chrX | 161928487 | 161929234 |
| 1 | 1.6E+08  | 1.6E+08  | NM_20758 | chr1 | 160194197 | 160194919 |
| 1 | 1.6E+08  | 1.6E+08  | NM_00749 | chr1 | 160194197 | 160194919 |
| X | 1.6E+08  | 1.6E+08  | NM_00975 | chrX | 159601561 | 159602287 |
| 1 | 1.59E+08 | 1.59E+08 | NM_02833 | chr1 | 158669640 | 158670208 |
| 1 | 1.59E+08 | 1.59E+08 | NM_14541 | chr1 | 158557533 | 158558164 |
| 1 | 1.58E+08 | 1.58E+08 | NM_00923 | chr1 | 158302743 | 158303327 |
| 3 | 1.58E+08 | 1.58E+08 | NM_14595 | chr3 | 157859974 | 157860571 |
| 3 | 1.57E+08 | 1.58E+08 | NM_01119 | chr3 | 157502471 | 157503107 |
| 1 | 1.57E+08 | 1.57E+08 | NM_01127 | chr1 | 157181879 | 157182699 |
| 2 | 1.57E+08 | 1.57E+08 | M31658   | chr2 | 157032415 | 157033060 |
| 2 | 1.56E+08 | 1.56E+08 | NM_02666 | chr2 | 156240787 | 156241404 |
| 2 | 1.56E+08 | 1.56E+08 | NM_02666 | chr2 | 156238466 | 156239077 |
| 1 | 1.55E+08 | 1.55E+08 | NM_02874 | chr1 | 155315071 | 155315778 |
| X | 1.55E+08 | 1.55E+08 | NM_02138 | chrX | 155046827 | 155047512 |

|   |   |          |          |          |      |           |           |
|---|---|----------|----------|----------|------|-----------|-----------|
|   | 3 | 1.55E+08 | 1.55E+08 | NM_02893 | chr3 | 155022852 | 155023703 |
|   | 4 | 1.55E+08 | 1.55E+08 | BC064021 | chr4 | 155017790 | 155018849 |
| X |   | 1.55E+08 | 1.55E+08 | NM_02543 | chrX | 154710832 | 154711435 |
|   | 3 | 1.54E+08 | 1.54E+08 | BC068154 | chr3 | 154190195 | 154190802 |
|   | 2 | 1.54E+08 | 1.54E+08 | NM_00102 | chr2 | 153999106 | 154000238 |
|   | 3 | 1.54E+08 | 1.54E+08 | AY351591 | chr3 | 153820803 | 153821647 |
|   | 3 | 1.54E+08 | 1.54E+08 | AY351589 | chr3 | 153806387 | 153807412 |
|   | 4 | 1.54E+08 | 1.54E+08 | NM_17893 | chr4 | 153776833 | 153777606 |
|   | 1 | 1.54E+08 | 1.54E+08 | BC022177 | chr1 | 153657592 | 153658415 |
|   | 2 | 1.54E+08 | 1.54E+08 | NM_02959 | chr2 | 153567029 | 153567977 |
|   | 2 | 1.54E+08 | 1.54E+08 | NM_02563 | chr2 | 153567029 | 153567977 |
|   | 2 | 1.54E+08 | 1.54E+08 | NM_02959 | chr2 | 153564516 | 153565892 |
|   | 2 | 1.54E+08 | 1.54E+08 | NM_02563 | chr2 | 153564516 | 153565892 |
|   | 2 | 1.54E+08 | 1.54E+08 | NM_02959 | chr2 | 153561060 | 153562095 |
|   | 2 | 1.54E+08 | 1.54E+08 | NM_02563 | chr2 | 153561060 | 153562095 |
|   | 4 | 1.54E+08 | 1.54E+08 | NM_02851 | chr4 | 153510528 | 153511425 |
|   | 4 | 1.53E+08 | 1.53E+08 | BC039980 | chr4 | 153106949 | 153107782 |
|   | 4 | 1.53E+08 | 1.53E+08 | BC039980 | chr4 | 153103629 | 153104221 |
|   | 4 | 1.53E+08 | 1.53E+08 | BC066045 | chr4 | 152945009 | 152945680 |
|   | 3 | 1.53E+08 | 1.53E+08 | NM_01202 | chr3 | 152923944 | 152924524 |
|   | 4 | 1.53E+08 | 1.53E+08 | NM_00103 | chr4 | 152885667 | 152886480 |
|   | 2 | 1.53E+08 | 1.53E+08 | NM_01040 | chr2 | 152798614 | 152799269 |
|   | 3 | 1.53E+08 | 1.53E+08 | BC047203 | chr3 | 152673396 | 152674005 |
|   | 2 | 1.52E+08 | 1.52E+08 | NM_14515 | chr2 | 152275443 | 152276030 |
|   | 2 | 1.52E+08 | 1.52E+08 | NM_17765 | chr2 | 152104978 | 152105574 |
|   | 2 | 1.52E+08 | 1.52E+08 | NM_17512 | chr2 | 152104978 | 152105574 |
|   | 3 | 1.52E+08 | 1.52E+08 | NM_00896 | chr3 | 151778848 | 151779417 |
|   | 5 | 1.51E+08 | 1.51E+08 | NM_14625 | chr5 | 151458983 | 151459946 |
|   | 3 | 1.51E+08 | 1.51E+08 | NM_13322 | chr3 | 151376572 | 151377184 |
|   | 4 | 1.51E+08 | 1.51E+08 | BC098195 | chr4 | 151219434 | 151220099 |
|   | 4 | 1.51E+08 | 1.51E+08 | BC098195 | chr4 | 151217626 | 151218582 |
|   | 4 | 1.51E+08 | 1.51E+08 | BC098195 | chr4 | 151216327 | 151216932 |
|   | 4 | 1.51E+08 | 1.51E+08 | NM_00823 | chr4 | 151134311 | 151134923 |
|   | 2 | 1.51E+08 | 1.51E+08 | NM_20720 | chr2 | 150699170 | 150699764 |
|   | 2 | 1.5E+08  | 1.5E+08  | NM_18126 | chr2 | 149831495 | 149832098 |
|   | 5 | 1.5E+08  | 1.5E+08  | BC120819 | chr5 | 149703718 | 149704920 |
|   | 5 | 1.49E+08 | 1.49E+08 | NM_00101 | chr5 | 149490331 | 149490925 |
|   | 2 | 1.48E+08 | 1.48E+08 | NM_03005 | chr2 | 148465637 | 148466600 |
|   | 4 | 1.48E+08 | 1.48E+08 | NM_02305 | chr4 | 148428598 | 148429576 |
|   | 6 | 1.48E+08 | 1.48E+08 | NM_19896 | chr6 | 148406127 | 148406735 |
|   | 5 | 1.48E+08 | 1.48E+08 | NM_02787 | chr5 | 148209778 | 148210393 |
|   | 4 | 1.48E+08 | 1.48E+08 | NM_00774 | chr4 | 147970187 | 147970843 |
| X |   | 1.48E+08 | 1.48E+08 | NM_02983 | chrX | 147690749 | 147691386 |
| X |   | 1.48E+08 | 1.48E+08 | NM_02983 | chrX | 147688220 | 147688873 |
|   | 4 | 1.47E+08 | 1.47E+08 | NM_00103 | chr4 | 147347689 | 147348494 |
|   | 5 | 1.47E+08 | 1.47E+08 | BC049274 | chr5 | 147068974 | 147069785 |
|   | 5 | 1.47E+08 | 1.47E+08 | NM_00101 | chr5 | 146899936 | 146900877 |

|   |   |          |          |          |      |           |           |
|---|---|----------|----------|----------|------|-----------|-----------|
|   | 4 | 1.47E+08 | 1.47E+08 | NM_00872 | chr4 | 146826130 | 146826764 |
|   | 6 | 1.47E+08 | 1.47E+08 | NM_17230 | chr6 | 146760559 | 146761151 |
|   | 6 | 1.47E+08 | 1.47E+08 | NM_02531 | chr6 | 146597107 | 146597724 |
|   | 3 | 1.47E+08 | 1.47E+08 | BC075661 | chr3 | 146539486 | 146539972 |
|   | 3 | 1.47E+08 | 1.47E+08 | NM_00947 | chr3 | 146531230 | 146531937 |
|   | 3 | 1.47E+08 | 1.47E+08 | BC075661 | chr3 | 146531230 | 146531937 |
| X |   | 1.46E+08 | 1.46E+08 | NM_00100 | chrX | 145994294 | 145995568 |
| X |   | 1.46E+08 | 1.46E+08 | NM_00100 | chrX | 145992887 | 145993494 |
|   | 2 | 1.46E+08 | 1.46E+08 | NM_02582 | chr2 | 145631365 | 145632009 |
|   | 5 | 1.45E+08 | 1.45E+08 | NM_17857 | chr5 | 145425626 | 145426215 |
|   | 5 | 1.45E+08 | 1.45E+08 | NM_13373 | chr5 | 145425626 | 145426215 |
|   | 6 | 1.45E+08 | 1.45E+08 | NM_00100 | chr6 | 145344296 | 145345016 |
|   | 7 | 1.45E+08 | 1.45E+08 | NM_20349 | chr7 | 145121497 | 145122202 |
|   | 7 | 1.45E+08 | 1.45E+08 | NM_20349 | chr7 | 145119223 | 145119829 |
|   | 5 | 1.44E+08 | 1.44E+08 | NM_01080 | chr5 | 144438994 | 144439591 |
|   | 7 | 1.44E+08 | 1.44E+08 | BC006062 | chr7 | 144422269 | 144422875 |
|   | 7 | 1.44E+08 | 1.44E+08 | NM_00780 | chr7 | 144282860 | 144283479 |
|   | 4 | 1.44E+08 | 1.44E+08 | NM_01130 | chr4 | 144161612 | 144162186 |
|   | 5 | 1.44E+08 | 1.44E+08 | NM_13335 | chr5 | 143635891 | 143636566 |
|   | 7 | 1.43E+08 | 1.44E+08 | NM_02429 | chr7 | 143497414 | 143498440 |
|   | 7 | 1.43E+08 | 1.43E+08 | NM_00104 | chr7 | 143284612 | 143285254 |
|   | 6 | 1.43E+08 | 1.43E+08 | NM_01137 | chr6 | 142919421 | 142920029 |
|   | 7 | 1.43E+08 | 1.43E+08 | NM_02027 | chr7 | 142909328 | 142909983 |
|   | 6 | 1.43E+08 | 1.43E+08 | NM_17731 | chr6 | 142573894 | 142574228 |
|   | 6 | 1.43E+08 | 1.43E+08 | NM_17731 | chr6 | 142571999 | 142573206 |
|   | 7 | 1.42E+08 | 1.42E+08 | BC025150 | chr7 | 142387017 | 142387755 |
|   | 7 | 1.42E+08 | 1.42E+08 | NM_01162 | chr7 | 142309659 | 142310368 |
|   | 7 | 1.42E+08 | 1.42E+08 | NM_01162 | chr7 | 142304789 | 142305398 |
|   | 7 | 1.42E+08 | 1.42E+08 | NM_01084 | chr7 | 141601059 | 141601651 |
|   | 7 | 1.42E+08 | 1.42E+08 | NM_18172 | chr7 | 141504670 | 141505560 |
|   | 4 | 1.41E+08 | 1.41E+08 | BC022941 | chr4 | 141486293 | 141487201 |
|   | 2 | 1.41E+08 | 1.41E+08 | NM_00101 | chr2 | 141247234 | 141248010 |
|   | 7 | 1.41E+08 | 1.41E+08 | BC046399 | chr7 | 141194591 | 141195237 |
|   | 7 | 1.41E+08 | 1.41E+08 | NM_02779 | chr7 | 141179981 | 141180599 |
|   | 7 | 1.41E+08 | 1.41E+08 | NM_01687 | chr7 | 141179981 | 141180599 |
|   | 7 | 1.41E+08 | 1.41E+08 | NM_00787 | chr7 | 141144161 | 141144897 |
|   | 4 | 1.41E+08 | 1.41E+08 | NM_00101 | chr4 | 140896990 | 140897752 |
|   | 4 | 1.41E+08 | 1.41E+08 | AF513359 | chr4 | 140867291 | 140867936 |
|   | 5 | 1.41E+08 | 1.41E+08 | NM_00849 | chr5 | 140861693 | 140862695 |
|   | 7 | 1.41E+08 | 1.41E+08 | NM_02537 | chr7 | 140861039 | 140861847 |
|   | 1 | 1.41E+08 | 1.41E+08 | NM_18134 | chr1 | 140775376 | 140776001 |
|   | 5 | 1.41E+08 | 1.41E+08 | NM_00863 | chr5 | 140584113 | 140585134 |
|   | 5 | 1.41E+08 | 1.41E+08 | NM_02651 | chr5 | 140584113 | 140585134 |
|   | 7 | 1.41E+08 | 1.41E+08 | NM_14696 | chr7 | 140519049 | 140519728 |
|   | 7 | 1.4E+08  | 1.41E+08 | NM_14696 | chr7 | 140504228 | 140504850 |
|   | 4 | 1.4E+08  | 1.4E+08  | NM_17786 | chr4 | 140362207 | 140362706 |
|   | 7 | 1.4E+08  | 1.4E+08  | NM_14651 | chr7 | 140228337 | 140228934 |

|   |          |          |          |      |           |           |
|---|----------|----------|----------|------|-----------|-----------|
| 7 | 1.4E+08  | 1.4E+08  | NM_14695 | chr7 | 140174983 | 140175828 |
| 4 | 1.4E+08  | 1.4E+08  | NM_01106 | chr4 | 140081735 | 140082344 |
| 7 | 1.4E+08  | 1.4E+08  | NM_00101 | chr7 | 140059158 | 140060059 |
| 7 | 1.4E+08  | 1.4E+08  | NM_14651 | chr7 | 140025640 | 140026429 |
| 7 | 1.4E+08  | 1.4E+08  | NM_01083 | chr7 | 139904388 | 139905191 |
| 7 | 1.4E+08  | 1.4E+08  | NM_01083 | chr7 | 139901700 | 139902426 |
| 2 | 1.4E+08  | 1.4E+08  | NM_02709 | chr2 | 139859414 | 139860052 |
| 6 | 1.4E+08  | 1.4E+08  | NM_01108 | chr6 | 139804916 | 139805384 |
| 7 | 1.4E+08  | 1.4E+08  | BC056493 | chr7 | 139687177 | 139687864 |
| 7 | 1.4E+08  | 1.4E+08  | BC060951 | chr7 | 139515487 | 139516182 |
| 3 | 1.39E+08 | 1.39E+08 | NM_19865 | chr3 | 139143997 | 139144751 |
| 5 | 1.39E+08 | 1.39E+08 | BC004044 | chr5 | 139047355 | 139048379 |
| 7 | 1.39E+08 | 1.39E+08 | NM_01199 | chr7 | 138935904 | 138936497 |
| 4 | 1.39E+08 | 1.39E+08 | NM_03187 | chr4 | 138926811 | 138927649 |
| 5 | 1.38E+08 | 1.38E+08 | NM_00101 | chr5 | 138459969 | 138460587 |
| 5 | 1.38E+08 | 1.38E+08 | NM_00101 | chr5 | 138454057 | 138454587 |
| 6 | 1.38E+08 | 1.38E+08 | BC057086 | chr6 | 138390558 | 138391787 |
| 4 | 1.38E+08 | 1.38E+08 | NM_00867 | chr4 | 138370414 | 138370897 |
| 4 | 1.38E+08 | 1.38E+08 | NM_02985 | chr4 | 138238628 | 138239278 |
| 6 | 1.38E+08 | 1.38E+08 | NM_01994 | chr6 | 138101443 | 138102062 |
| 4 | 1.38E+08 | 1.38E+08 | NM_01204 | chr4 | 138032053 | 138032667 |
| 3 | 1.38E+08 | 1.38E+08 | NM_17786 | chr3 | 138009778 | 138010728 |
| 3 | 1.38E+08 | 1.38E+08 | NM_01675 | chr3 | 137801983 | 137802648 |
| 5 | 1.38E+08 | 1.38E+08 | NM_01579 | chr5 | 137796338 | 137796972 |
| 5 | 1.38E+08 | 1.38E+08 | NM_01014 | chr5 | 137581514 | 137582377 |
| 6 | 1.37E+08 | 1.37E+08 | U37465   | chr6 | 137376169 | 137376800 |
| 3 | 1.37E+08 | 1.37E+08 | NM_01688 | chr3 | 137275682 | 137276300 |
| 1 | 1.37E+08 | 1.37E+08 | BC025914 | chr1 | 137255192 | 137256040 |
| 1 | 1.37E+08 | 1.37E+08 | NM_15377 | chr1 | 137251333 | 137252547 |
| 7 | 1.37E+08 | 1.37E+08 | NM_01009 | chr7 | 137156607 | 137157329 |
| 4 | 1.37E+08 | 1.37E+08 | NM_00743 | chr4 | 137073796 | 137074353 |
| 6 | 1.37E+08 | 1.37E+08 | NM_00748 | chr6 | 136898537 | 136899262 |
| 3 | 1.37E+08 | 1.37E+08 | NM_00891 | chr3 | 136606292 | 136606909 |
| 5 | 1.37E+08 | 1.37E+08 | U46684   | chr5 | 136590315 | 136590908 |
| 1 | 1.36E+08 | 1.36E+08 | NM_00930 | chr1 | 136460743 | 136461338 |
| 5 | 1.36E+08 | 1.36E+08 | NM_02807 | chr5 | 136419711 | 136420698 |
| 5 | 1.36E+08 | 1.36E+08 | NM_02789 | chr5 | 136419711 | 136420698 |
| X | 1.36E+08 | 1.36E+08 | NM_03018 | chrX | 136251633 | 136252300 |
| 1 | 1.36E+08 | 1.36E+08 | NM_02058 | chr1 | 136180762 | 136181506 |
| 1 | 1.36E+08 | 1.36E+08 | NM_03118 | chr1 | 136102048 | 136102933 |
| 1 | 1.36E+08 | 1.36E+08 | NM_03118 | chr1 | 136100810 | 136101493 |
| X | 1.36E+08 | 1.36E+08 | NM_01184 | chrX | 136006685 | 136007391 |
| 1 | 1.36E+08 | 1.36E+08 | AY536287 | chr1 | 135949386 | 135949977 |
| 5 | 1.36E+08 | 1.36E+08 | NM_01957 | chr5 | 135856513 | 135857508 |
| 5 | 1.36E+08 | 1.36E+08 | NM_03357 | chr5 | 135636272 | 135636818 |
| 5 | 1.36E+08 | 1.36E+08 | NM_03357 | chr5 | 135632091 | 135633076 |
| 1 | 1.36E+08 | 1.36E+08 | NM_21361 | chr1 | 135570871 | 135571630 |

|   |   |          |          |          |      |           |           |
|---|---|----------|----------|----------|------|-----------|-----------|
|   | 1 | 1.36E+08 | 1.36E+08 | NM_21361 | chr1 | 135569957 | 135570645 |
|   | 4 | 1.36E+08 | 1.36E+08 | NM_01154 | chr4 | 135521285 | 135522008 |
|   | 7 | 1.35E+08 | 1.35E+08 | U36758   | chr7 | 135484444 | 135485059 |
|   | 7 | 1.35E+08 | 1.35E+08 | NM_17866 | chr7 | 135364880 | 135365941 |
|   | 1 | 1.35E+08 | 1.35E+08 | NM_17826 | chr1 | 135151248 | 135152166 |
| X |   | 1.35E+08 | 1.35E+08 | NM_17532 | chrX | 134827656 | 134828269 |
|   | 4 | 1.35E+08 | 1.35E+08 | NM_02899 | chr4 | 134769666 | 134770250 |
|   | 4 | 1.35E+08 | 1.35E+08 | NM_03018 | chr4 | 134769666 | 134770250 |
|   | 1 | 1.35E+08 | 1.35E+08 | AY362823 | chr1 | 134763480 | 134764314 |
|   | 1 | 1.35E+08 | 1.35E+08 | AY362823 | chr1 | 134762056 | 134762723 |
|   | 1 | 1.35E+08 | 1.35E+08 | NM_01073 | chr1 | 134709368 | 134710066 |
|   | 1 | 1.35E+08 | 1.35E+08 | NM_01073 | chr1 | 134704543 | 134705621 |
|   | 4 | 1.35E+08 | 1.35E+08 | NM_14555 | chr4 | 134671648 | 134672335 |
|   | 6 | 1.35E+08 | 1.35E+08 | NM_00851 | chr6 | 134536356 | 134536954 |
|   | 1 | 1.34E+08 | 1.34E+08 | BC062092 | chr1 | 134434645 | 134435235 |
| X |   | 1.34E+08 | 1.34E+08 | NM_17792 | chrX | 134434634 | 134435017 |
|   | 7 | 1.34E+08 | 1.34E+08 | NM_00947 | chr7 | 133544015 | 133544626 |
|   | 7 | 1.34E+08 | 1.34E+08 | NM_02539 | chr7 | 133544015 | 133544626 |
|   | 7 | 1.34E+08 | 1.34E+08 | NM_15294 | chr7 | 133519057 | 133519715 |
|   | 1 | 1.33E+08 | 1.33E+08 | NM_01977 | chr1 | 133106491 | 133107096 |
|   | 1 | 1.33E+08 | 1.33E+08 | AY261333 | chr1 | 133032626 | 133033320 |
|   | 3 | 1.33E+08 | 1.33E+08 | NM_02792 | chr3 | 133029283 | 133029880 |
|   | 3 | 1.33E+08 | 1.33E+08 | NM_02623 | chr3 | 133029283 | 133029880 |
|   | 7 | 1.33E+08 | 1.33E+08 | BC017520 | chr7 | 132858955 | 132859786 |
|   | 1 | 1.33E+08 | 1.33E+08 | NM_01054 | chr1 | 132848367 | 132849075 |
|   | 1 | 1.33E+08 | 1.33E+08 | NM_05309 | chr1 | 132716378 | 132717028 |
|   | 1 | 1.33E+08 | 1.33E+08 | NM_05309 | chr1 | 132711254 | 132712230 |
|   | 1 | 1.33E+08 | 1.33E+08 | NM_02697 | chr1 | 132693131 | 132694019 |
|   | 1 | 1.33E+08 | 1.33E+08 | NM_01108 | chr1 | 132661535 | 132662199 |
|   | 2 | 1.32E+08 | 1.33E+08 | NM_17511 | chr2 | 132511156 | 132512313 |
|   | 6 | 1.32E+08 | 1.32E+08 | NM_00100 | chr6 | 132408106 | 132408839 |
|   | 7 | 1.32E+08 | 1.32E+08 | AF320786 | chr7 | 132106963 | 132107629 |
|   | 8 | 1.32E+08 | 1.32E+08 | NM_02906 | chr8 | 131955894 | 131956669 |
|   | 2 | 1.32E+08 | 1.32E+08 | NM_02304 | chr2 | 131638815 | 131639376 |
|   | 3 | 1.31E+08 | 1.31E+08 | NM_02894 | chr3 | 131333334 | 131333948 |
|   | 2 | 1.31E+08 | 1.31E+08 | NM_01346 | chr2 | 131258564 | 131259050 |
| X |   | 1.31E+08 | 1.31E+08 | BC058970 | chrX | 131139584 | 131140190 |
|   | 7 | 1.31E+08 | 1.31E+08 | NM_17516 | chr7 | 130965330 | 130966047 |
| X |   | 1.31E+08 | 1.31E+08 | NM_18332 | chrX | 130715330 | 130715915 |
|   | 7 | 1.31E+08 | 1.31E+08 | AB036742 | chr7 | 130567474 | 130568336 |
|   | 7 | 1.3E+08  | 1.3E+08  | NM_00100 | chr7 | 130367822 | 130368803 |
|   | 2 | 1.3E+08  | 1.3E+08  | NM_19794 | chr2 | 130334534 | 130335359 |
|   | 2 | 1.3E+08  | 1.3E+08  | NM_19794 | chr2 | 130330844 | 130331724 |
|   | 2 | 1.3E+08  | 1.3E+08  | NM_19794 | chr2 | 130323623 | 130324412 |
|   | 8 | 1.3E+08  | 1.3E+08  | BC025186 | chr8 | 130322500 | 130323118 |
|   | 2 | 1.3E+08  | 1.3E+08  | NM_00973 | chr2 | 130274980 | 130275698 |
|   | 4 | 1.3E+08  | 1.3E+08  | NM_01076 | chr4 | 130214343 | 130215170 |

|   |    |          |          |                |           |           |
|---|----|----------|----------|----------------|-----------|-----------|
|   | 5  | 1.3E+08  | 1.3E+08  | NM_00809 chr5  | 130036536 | 130037371 |
|   | 3  | 1.3E+08  | 1.3E+08  | NM_02577 chr3  | 129961193 | 129961824 |
| X |    | 1.3E+08  | 1.3E+08  | NM_01986 chrX  | 129943819 | 129944625 |
|   | 2  | 1.3E+08  | 1.3E+08  | NM_13865 chr2  | 129882675 | 129883290 |
|   | 2  | 1.3E+08  | 1.3E+08  | NM_17772 chr2  | 129814683 | 129815624 |
|   | 10 | 1.3E+08  | 1.3E+08  | NM_18326 chr10 | 129758524 | 129759723 |
|   | 10 | 1.3E+08  | 1.3E+08  | NM_18326 chr10 | 129747269 | 129748010 |
|   | 6  | 1.3E+08  | 1.3E+08  | NM_00101 chr6  | 129682695 | 129683291 |
|   | 6  | 1.3E+08  | 1.3E+08  | NM_15359 chr6  | 129538236 | 129538939 |
| X |    | 1.3E+08  | 1.3E+08  | NM_18331 chrX  | 129509957 | 129510684 |
|   | 5  | 1.29E+08 | 1.29E+08 | NM_01364 chr5  | 129447919 | 129448803 |
|   | 2  | 1.29E+08 | 1.29E+08 | NM_01886 chr2  | 129391634 | 129392242 |
|   | 6  | 1.29E+08 | 1.29E+08 | BC117712 chr6  | 129350229 | 129351063 |
|   | 6  | 1.29E+08 | 1.29E+08 | NM_00103 chr6  | 129241990 | 129242737 |
|   | 2  | 1.29E+08 | 1.29E+08 | NM_17765 chr2  | 129232416 | 129233438 |
|   | 2  | 1.29E+08 | 1.29E+08 | NM_17765 chr2  | 129230098 | 129231102 |
|   | 8  | 1.29E+08 | 1.29E+08 | NM_17543 chr8  | 129179962 | 129180574 |
|   | 2  | 1.29E+08 | 1.29E+08 | NM_17784 chr2  | 129064772 | 129065396 |
|   | 2  | 1.29E+08 | 1.29E+08 | NM_17784 chr2  | 129059527 | 129060126 |
| X |    | 1.29E+08 | 1.29E+08 | BC118529 chrX  | 129037460 | 129038051 |
|   | 10 | 1.29E+08 | 1.29E+08 | NM_14693 chr10 | 129013973 | 129015018 |
|   | 5  | 1.29E+08 | 1.29E+08 | NM_17528 chr5  | 128913609 | 128914505 |
|   | 6  | 1.29E+08 | 1.29E+08 | NM_03059 chr6  | 128792215 | 128792827 |
|   | 10 | 1.29E+08 | 1.29E+08 | NM_14672 chr10 | 128732828 | 128733460 |
|   | 10 | 1.29E+08 | 1.29E+08 | NM_20762 chr10 | 128638810 | 128639820 |
|   | 6  | 1.29E+08 | 1.29E+08 | NM_01073 chr6  | 128590346 | 128591518 |
|   | 6  | 1.29E+08 | 1.29E+08 | NM_01073 chr6  | 128587807 | 128588594 |
|   | 10 | 1.28E+08 | 1.28E+08 | NM_14631 chr10 | 128482445 | 128483468 |
|   | 10 | 1.28E+08 | 1.28E+08 | NM_02785 chr10 | 128367592 | 128368217 |
|   | 4  | 1.28E+08 | 1.28E+08 | BC057571 chr4  | 128191302 | 128192120 |
|   | 4  | 1.28E+08 | 1.28E+08 | BC057571 chr4  | 128186885 | 128187647 |
|   | 4  | 1.28E+08 | 1.28E+08 | NM_20582 chr4  | 128106642 | 128107289 |
|   | 4  | 1.28E+08 | 1.28E+08 | NM_17775 chr4  | 128088150 | 128088619 |
|   | 5  | 1.28E+08 | 1.28E+08 | NM_13389 chr5  | 127904145 | 127904949 |
|   | 6  | 1.28E+08 | 1.28E+08 | NM_02674 chr6  | 127848909 | 127849675 |
|   | 2  | 1.28E+08 | 1.28E+08 | NM_20768 chr2  | 127815116 | 127815958 |
|   | 3  | 1.28E+08 | 1.28E+08 | BC002199 chr3  | 127800371 | 127800800 |
|   | 7  | 1.28E+08 | 1.28E+08 | NM_00929 chr7  | 127626951 | 127627598 |
|   | 2  | 1.28E+08 | 1.28E+08 | BC048717 chr2  | 127601183 | 127601824 |
|   | 8  | 1.28E+08 | 1.28E+08 | BC017545 chr8  | 127578177 | 127579006 |
|   | 8  | 1.28E+08 | 1.28E+08 | BC017545 chr8  | 127573578 | 127574828 |
|   | 8  | 1.28E+08 | 1.28E+08 | NM_17514 chr8  | 127550368 | 127550746 |
|   | 7  | 1.28E+08 | 1.28E+08 | NM_19885 chr7  | 127516913 | 127517797 |
|   | 10 | 1.27E+08 | 1.27E+08 | NM_02730 chr10 | 127299230 | 127300082 |
|   | 10 | 1.27E+08 | 1.27E+08 | NM_14722 chr10 | 127253675 | 127254424 |
|   | 2  | 1.27E+08 | 1.27E+08 | NM_17804 chr2  | 127235263 | 127235753 |
|   | 7  | 1.27E+08 | 1.27E+08 | NM_02699 chr7  | 127210416 | 127211018 |



|    |          |          |          |       |           |           |
|----|----------|----------|----------|-------|-----------|-----------|
| 10 | 1.27E+08 | 1.27E+08 | NM_00904 | chr10 | 127204549 | 127205150 |
| 8  | 1.27E+08 | 1.27E+08 | BC053063 | chr8  | 127181173 | 127181775 |
| 6  | 1.27E+08 | 1.27E+08 | NM_02265 | chr6  | 127033094 | 127033732 |
| 7  | 1.27E+08 | 1.27E+08 | NM_14620 | chr7  | 127026438 | 127027077 |
| 4  | 1.27E+08 | 1.27E+08 | NM_01029 | chr4  | 126852559 | 126853704 |
| 6  | 1.27E+08 | 1.27E+08 | NM_01356 | chr6  | 126704561 | 126705415 |
| 10 | 1.27E+08 | 1.27E+08 | NM_03307 | chr10 | 126696298 | 126697122 |
| 10 | 1.27E+08 | 1.27E+08 | NM_05409 | chr10 | 126613368 | 126614899 |
| 8  | 1.27E+08 | 1.27E+08 | NM_13395 | chr8  | 126539447 | 126540035 |
| 7  | 1.26E+08 | 1.27E+08 | NM_00989 | chr7  | 126499025 | 126499892 |
| 10 | 1.26E+08 | 1.26E+08 | NM_00987 | chr10 | 126460529 | 126461564 |
| 10 | 1.26E+08 | 1.26E+08 | NM_00103 | chr10 | 126460529 | 126461564 |
| 10 | 1.26E+08 | 1.26E+08 | NM_01000 | chr10 | 126447017 | 126447633 |
| 10 | 1.26E+08 | 1.26E+08 | NM_14601 | chr10 | 126404240 | 126404905 |
| 8  | 1.26E+08 | 1.26E+08 | BC026502 | chr8  | 126235905 | 126236501 |
| 7  | 1.26E+08 | 1.26E+08 | NM_00984 | chr7  | 126207455 | 126208681 |
| 4  | 1.26E+08 | 1.26E+08 | NM_01197 | chr4  | 126174593 | 126175452 |
| 6  | 1.26E+08 | 1.26E+08 | NM_00874 | chr6  | 126135090 | 126135829 |
| 4  | 1.26E+08 | 1.26E+08 | NM_01190 | chr4  | 125826095 | 125827121 |
| 4  | 1.26E+08 | 1.26E+08 | BC019977 | chr4  | 125740766 | 125741470 |
| 4  | 1.26E+08 | 1.26E+08 | NM_02554 | chr4  | 125549446 | 125550233 |
| 6  | 1.26E+08 | 1.26E+08 | NM_01170 | chr6  | 125519770 | 125520364 |
| 10 | 1.25E+08 | 1.25E+08 | NM_17715 | chr10 | 125363765 | 125364502 |
| 4  | 1.25E+08 | 1.25E+08 | NM_00804 | chr4  | 125006509 | 125007105 |
| 6  | 1.25E+08 | 1.25E+08 | NM_01348 | chr6  | 124851191 | 124851815 |
| 6  | 1.25E+08 | 1.25E+08 | NM_01348 | chr6  | 124850202 | 124850823 |
| 2  | 1.25E+08 | 1.25E+08 | NM_17503 | chr2  | 124757975 | 124758704 |
| 8  | 1.24E+08 | 1.24E+08 | NM_02959 | chr8  | 124440956 | 124441541 |
| 3  | 1.24E+08 | 1.24E+08 | NM_14614 | chr3  | 124314953 | 124315559 |
| 6  | 1.24E+08 | 1.24E+08 | NM_05309 | chr6  | 124270811 | 124271789 |
| 9  | 1.24E+08 | 1.24E+08 | NM_00991 | chr9  | 123817473 | 123818216 |
| 3  | 1.24E+08 | 1.24E+08 | NM_03118 | chr3  | 123663473 | 123664097 |
| 9  | 1.24E+08 | 1.24E+08 | NM_13914 | chr9  | 123532611 | 123533266 |
| 1  | 1.23E+08 | 1.23E+08 | NM_01048 | chr1  | 123358783 | 123359533 |
| 14 | 1.23E+08 | 1.23E+08 | NM_01020 | chr14 | 123327606 | 123328203 |
| 5  | 1.23E+08 | 1.23E+08 | NM_17542 | chr5  | 123275109 | 123275747 |
| 1  | 1.23E+08 | 1.23E+08 | NM_00102 | chr1  | 123258484 | 123259072 |
| 6  | 1.23E+08 | 1.23E+08 | NM_01081 | chr6  | 123227349 | 123227971 |
| 6  | 1.23E+08 | 1.23E+08 | NM_02000 | chr6  | 123193606 | 123194219 |
| 1  | 1.23E+08 | 1.23E+08 | NM_13374 | chr1  | 123162938 | 123163606 |
| 3  | 1.23E+08 | 1.23E+08 | NM_02150 | chr3  | 123031788 | 123032639 |
| 5  | 1.23E+08 | 1.23E+08 | NM_01102 | chr5  | 122898656 | 122899140 |
| 6  | 1.23E+08 | 1.23E+08 | NM_19931 | chr6  | 122885629 | 122886225 |
| 3  | 1.23E+08 | 1.23E+08 | NM_00798 | chr3  | 122881733 | 122882389 |
| 8  | 1.23E+08 | 1.23E+08 | NM_03020 | chr8  | 122875130 | 122875733 |
| 4  | 1.23E+08 | 1.23E+08 | NM_00755 | chr4  | 122849965 | 122850542 |
| 9  | 1.23E+08 | 1.23E+08 | NM_00954 | chr9  | 122773427 | 122774153 |

|    |          |          |          |       |           |           |
|----|----------|----------|----------|-------|-----------|-----------|
| 3  | 1.23E+08 | 1.23E+08 | NM_15311 | chr3  | 122561653 | 122562716 |
| 2  | 1.22E+08 | 1.22E+08 | NM_02150 | chr2  | 122472976 | 122473647 |
| 5  | 1.22E+08 | 1.22E+08 | NM_00104 | chr5  | 122469462 | 122470194 |
| 5  | 1.22E+08 | 1.22E+08 | NM_18330 | chr5  | 122397787 | 122398795 |
| 4  | 1.22E+08 | 1.22E+08 | NM_00759 | chr4  | 122373356 | 122373842 |
| 6  | 1.22E+08 | 1.22E+08 | NM_00101 | chr6  | 122097385 | 122097970 |
| 2  | 1.22E+08 | 1.22E+08 | NM_00101 | chr2  | 122057323 | 122058188 |
| 9  | 1.22E+08 | 1.22E+08 | NM_13374 | chr9  | 121979210 | 121979798 |
| 9  | 1.22E+08 | 1.22E+08 | NM_17774 | chr9  | 121803009 | 121803649 |
| 5  | 1.22E+08 | 1.22E+08 | NM_17212 | chr5  | 121786024 | 121786681 |
| 3  | 1.22E+08 | 1.22E+08 | NM_14539 | chr3  | 121521893 | 121522642 |
| 9  | 1.21E+08 | 1.21E+08 | NM_01170 | chr9  | 121488898 | 121489727 |
| 9  | 1.21E+08 | 1.21E+08 | NM_02691 | chr9  | 121488898 | 121489727 |
| 1  | 1.21E+08 | 1.21E+08 | NM_14550 | chr1  | 121481477 | 121482063 |
| 9  | 1.21E+08 | 1.21E+08 | AY572449 | chr9  | 121433030 | 121433772 |
| 6  | 1.21E+08 | 1.21E+08 | NM_13366 | chr6  | 121307309 | 121307861 |
| 2  | 1.21E+08 | 1.21E+08 | BC057549 | chr2  | 121276409 | 121277334 |
| 1  | 1.21E+08 | 1.21E+08 | NM_00838 | chr1  | 121253328 | 121253981 |
| 5  | 1.21E+08 | 1.21E+08 | NM_13389 | chr5  | 121174814 | 121175519 |
| 5  | 1.21E+08 | 1.21E+08 | NM_14521 | chr5  | 121170071 | 121170692 |
| 5  | 1.21E+08 | 1.21E+08 | NM_13389 | chr5  | 121170071 | 121170692 |
| 3  | 1.21E+08 | 1.21E+08 | NM_02845 | chr3  | 121169043 | 121169675 |
| 3  | 1.21E+08 | 1.21E+08 | NM_02845 | chr3  | 121167553 | 121168165 |
| 5  | 1.21E+08 | 1.21E+08 | NM_01185 | chr5  | 121149604 | 121150674 |
| 5  | 1.21E+08 | 1.21E+08 | NM_14522 | chr5  | 121119093 | 121119922 |
| 2  | 1.21E+08 | 1.21E+08 | NM_00795 | chr2  | 121106668 | 121107308 |
| 5  | 1.21E+08 | 1.21E+08 | NM_03354 | chr5  | 121076601 | 121077425 |
| 2  | 1.21E+08 | 1.21E+08 | BC035206 | chr2  | 120918844 | 120919494 |
| 11 | 1.21E+08 | 1.21E+08 | NM_14537 | chr11 | 120896317 | 120897397 |
| 11 | 1.21E+08 | 1.21E+08 | NM_02690 | chr11 | 120878621 | 120879242 |
| 6  | 1.21E+08 | 1.21E+08 | U75506   | chr6  | 120867654 | 120868071 |
| 11 | 1.21E+08 | 1.21E+08 | NM_00985 | chr11 | 120854060 | 120854663 |
| 11 | 1.21E+08 | 1.21E+08 | NM_00985 | chr11 | 120853003 | 120853752 |
| 11 | 1.21E+08 | 1.21E+08 | NM_00798 | chr11 | 120640166 | 120640828 |
| 11 | 1.21E+08 | 1.21E+08 | NM_14537 | chr11 | 120597669 | 120598299 |
| 11 | 1.21E+08 | 1.21E+08 | NM_00905 | chr11 | 120597669 | 120598299 |
| 11 | 1.21E+08 | 1.21E+08 | BC013455 | chr11 | 120580613 | 120581309 |
| 8  | 1.21E+08 | 1.21E+08 | NM_02872 | chr8  | 120561757 | 120562470 |
| 11 | 1.21E+08 | 1.21E+08 | NM_00762 | chr11 | 120548216 | 120548984 |
| 11 | 1.2E+08  | 1.2E+08  | NM_02422 | chr11 | 120440797 | 120441573 |
| 14 | 1.2E+08  | 1.2E+08  | BC096543 | chr14 | 120381564 | 120382492 |
| 2  | 1.2E+08  | 1.2E+08  | NM_00102 | chr2  | 120003513 | 120004330 |
| 9  | 1.2E+08  | 1.2E+08  | NM_00861 | chr9  | 120000955 | 120001722 |
| 9  | 1.2E+08  | 1.2E+08  | NM_00861 | chr9  | 119997599 | 119998134 |
| 7  | 1.2E+08  | 1.2E+08  | NM_02645 | chr7  | 119989896 | 119991010 |
| 7  | 1.2E+08  | 1.2E+08  | NM_01666 | chr7  | 119989896 | 119991010 |
| 7  | 1.2E+08  | 1.2E+08  | NM_01177 | chr7  | 119938553 | 119938977 |

|    |          |          |                |           |           |
|----|----------|----------|----------------|-----------|-----------|
| 7  | 1.2E+08  | 1.2E+08  | NM_01687 chr7  | 119559478 | 119559976 |
| 7  | 1.2E+08  | 1.2E+08  | NM_01687 chr7  | 119551331 | 119552096 |
| 7  | 1.19E+08 | 1.19E+08 | NM_05409 chr7  | 119410254 | 119410916 |
| 10 | 1.19E+08 | 1.19E+08 | AY255674 chr10 | 119396637 | 119397356 |
| 7  | 1.19E+08 | 1.19E+08 | NM_14619 chr7  | 119347334 | 119347967 |
| 6  | 1.19E+08 | 1.19E+08 | NM_17249 chr6  | 119297839 | 119298955 |
| 12 | 1.19E+08 | 1.19E+08 | NM_17708 chr12 | 119288972 | 119289850 |
| 7  | 1.19E+08 | 1.19E+08 | NM_02598 chr7  | 119255143 | 119256196 |
| 9  | 1.19E+08 | 1.19E+08 | BC060645 chr9  | 119172432 | 119173104 |
| 4  | 1.19E+08 | 1.19E+08 | NM_00819 chr4  | 119132939 | 119133956 |
| 4  | 1.19E+08 | 1.19E+08 | NM_00819 chr4  | 119131589 | 119132363 |
| 11 | 1.19E+08 | 1.19E+08 | NM_00806 chr11 | 119082368 | 119082944 |
| 2  | 1.19E+08 | 1.19E+08 | NM_14553 chr2  | 118966922 | 118967539 |
| 11 | 1.19E+08 | 1.19E+08 | NM_00762 chr11 | 118904344 | 118904960 |
| 2  | 1.19E+08 | 1.19E+08 | NM_00103 chr2  | 118863756 | 118864646 |
| 4  | 1.19E+08 | 1.19E+08 | NM_01173 chr4  | 118790229 | 118790841 |
| 7  | 1.19E+08 | 1.19E+08 | NM_02781 chr7  | 118526775 | 118527453 |
| 4  | 1.18E+08 | 1.18E+08 | NM_20757 chr4  | 118431912 | 118432829 |
| 6  | 1.18E+08 | 1.18E+08 | NM_02833 chr6  | 118418660 | 118419762 |
| 4  | 1.18E+08 | 1.18E+08 | NM_14633 chr4  | 118392034 | 118392772 |
| 4  | 1.18E+08 | 1.18E+08 | NM_14633 chr4  | 118390595 | 118391177 |
| 4  | 1.18E+08 | 1.18E+08 | NM_14633 chr4  | 118387348 | 118388465 |
| 4  | 1.18E+08 | 1.18E+08 | NM_00101 chr4  | 118366315 | 118366933 |
| 4  | 1.18E+08 | 1.18E+08 | NM_14630 chr4  | 118283847 | 118284440 |
| 11 | 1.18E+08 | 1.18E+08 | NM_02950 chr11 | 118231690 | 118232321 |
| 4  | 1.18E+08 | 1.18E+08 | NM_14630 chr4  | 118231112 | 118232263 |
| 6  | 1.18E+08 | 1.18E+08 | BC060169 chr6  | 118095183 | 118095986 |
| 6  | 1.18E+08 | 1.18E+08 | NM_03364 chr6  | 117906462 | 117906869 |
| 11 | 1.18E+08 | 1.18E+08 | NM_02791 chr11 | 117686394 | 117687041 |
| 11 | 1.18E+08 | 1.18E+08 | BC018495 chr11 | 117575364 | 117575957 |
| 8  | 1.17E+08 | 1.17E+08 | NM_01957 chr8  | 117320374 | 117320815 |
| 4  | 1.17E+08 | 1.17E+08 | NM_02941 chr4  | 117265115 | 117265722 |
| 4  | 1.17E+08 | 1.17E+08 | NM_02317 chr4  | 117184845 | 117185544 |
| 2  | 1.17E+08 | 1.17E+08 | NM_01124 chr2  | 117033932 | 117034521 |
| 3  | 1.17E+08 | 1.17E+08 | NM_02324 chr3  | 116960072 | 116961122 |
| 5  | 1.17E+08 | 1.17E+08 | BC024130 chr5  | 116706690 | 116707362 |
| 10 | 1.17E+08 | 1.17E+08 | NM_01359 chr10 | 116701629 | 116702270 |
| 10 | 1.17E+08 | 1.17E+08 | NM_01359 chr10 | 116699324 | 116700094 |
| 6  | 1.17E+08 | 1.17E+08 | NM_14675 chr6  | 116519138 | 116519737 |
| 10 | 1.16E+08 | 1.16E+08 | BC010763 chr10 | 116376013 | 116376620 |
| 11 | 1.16E+08 | 1.16E+08 | NM_00103 chr11 | 116275174 | 116275651 |
| 11 | 1.16E+08 | 1.16E+08 | NM_00103 chr11 | 116271330 | 116272231 |
| 11 | 1.16E+08 | 1.16E+08 | NM_00103 chr11 | 116269162 | 116269860 |
| 13 | 1.16E+08 | 1.16E+08 | NM_00103 chr13 | 116227416 | 116228028 |
| 3  | 1.16E+08 | 1.16E+08 | NM_02138 chr3  | 115993496 | 115994352 |
| 6  | 1.16E+08 | 1.16E+08 | NM_14538 chr6  | 115898211 | 115899808 |
| 6  | 1.16E+08 | 1.16E+08 | NM_14538 chr6  | 115891739 | 115892675 |

|    |          |          |                |           |           |
|----|----------|----------|----------------|-----------|-----------|
| 11 | 1.16E+08 | 1.16E+08 | NM_00821 chr11 | 115840015 | 115840685 |
| 11 | 1.16E+08 | 1.16E+08 | NM_17256 chr11 | 115840015 | 115840685 |
| 3  | 1.16E+08 | 1.16E+08 | NM_00790 chr3  | 115706248 | 115706974 |
| 11 | 1.16E+08 | 1.16E+08 | NM_02955 chr11 | 115626938 | 115627568 |
| 11 | 1.16E+08 | 1.16E+08 | NM_08064 chr11 | 115626938 | 115627568 |
| 10 | 1.15E+08 | 1.15E+08 | NM_01121 chr10 | 115423412 | 115424005 |
| 6  | 1.15E+08 | 1.15E+08 | U01841 chr6    | 115321347 | 115322199 |
| 13 | 1.15E+08 | 1.15E+08 | NM_17700 chr13 | 115274937 | 115275777 |
| 11 | 1.15E+08 | 1.15E+08 | NM_17280 chr11 | 115124260 | 115125404 |
| 11 | 1.15E+08 | 1.15E+08 | NM_17803 chr11 | 115115024 | 115115999 |
| 10 | 1.15E+08 | 1.15E+08 | NM_01019 chr10 | 114994024 | 114994800 |
| 3  | 1.15E+08 | 1.15E+08 | NM_15345 chr3  | 114897386 | 114898109 |
| 11 | 1.15E+08 | 1.15E+08 | NM_13415 chr11 | 114819638 | 114820533 |
| 5  | 1.15E+08 | 1.15E+08 | NM_05409 chr5  | 114638671 | 114639137 |
| 5  | 1.15E+08 | 1.15E+08 | NM_02614 chr5  | 114638671 | 114639137 |
| 4  | 1.15E+08 | 1.15E+08 | NM_00100 chr4  | 114636002 | 114636963 |
| 10 | 1.15E+08 | 1.15E+08 | NM_17339 chr10 | 114586645 | 114587321 |
| X  | 1.15E+08 | 1.15E+08 | BC111833 chrX  | 114545601 | 114546413 |
| 7  | 1.15E+08 | 1.15E+08 | NM_05408 chr7  | 114504395 | 114505402 |
| 7  | 1.14E+08 | 1.15E+08 | NM_01698 chr7  | 114498711 | 114499340 |
| 9  | 1.14E+08 | 1.14E+08 | BC047204 chr9  | 114447174 | 114447629 |
| 9  | 1.14E+08 | 1.14E+08 | BC047204 chr9  | 114444526 | 114445187 |
| 4  | 1.14E+08 | 1.14E+08 | NM_01575 chr4  | 114429256 | 114429853 |
| 4  | 1.14E+08 | 1.14E+08 | NM_00859 chr4  | 114407806 | 114408293 |
| 5  | 1.14E+08 | 1.14E+08 | NM_00915 chr5  | 114094071 | 114095000 |
| 5  | 1.14E+08 | 1.14E+08 | NM_00915 chr5  | 114092812 | 114093429 |
| 5  | 1.14E+08 | 1.14E+08 | NM_00101 chr5  | 113998249 | 113999133 |
| 8  | 1.14E+08 | 1.14E+08 | BC026611 chr8  | 113935400 | 113936019 |
| 8  | 1.14E+08 | 1.14E+08 | NM_00791 chr8  | 113893250 | 113894144 |
| 12 | 1.14E+08 | 1.14E+08 | BC057672 chr12 | 113755769 | 113756487 |
| 2  | 1.14E+08 | 1.14E+08 | NM_00960 chr2  | 113749292 | 113749880 |
| 13 | 1.14E+08 | 1.14E+08 | AY509150 chr13 | 113715439 | 113716067 |
| 8  | 1.14E+08 | 1.14E+08 | NM_02964 chr8  | 113692693 | 113693590 |
| 12 | 1.14E+08 | 1.14E+08 | NM_13404 chr12 | 113605750 | 113606390 |
| 11 | 1.13E+08 | 1.13E+08 | NM_01358 chr11 | 113459563 | 113460247 |
| 13 | 1.13E+08 | 1.13E+08 | NM_02989 chr13 | 113406597 | 113407136 |
| 11 | 1.13E+08 | 1.13E+08 | NM_02721 chr11 | 113385637 | 113386279 |
| 12 | 1.13E+08 | 1.13E+08 | NM_01992 chr12 | 113306361 | 113307137 |
| 12 | 1.13E+08 | 1.13E+08 | NM_00742 chr12 | 113064508 | 113065175 |
| 8  | 1.13E+08 | 1.13E+08 | NM_00758 chr8  | 113058010 | 113058601 |
| 6  | 1.13E+08 | 1.13E+08 | NM_00818 chr6  | 113011900 | 113012721 |
| 12 | 1.13E+08 | 1.13E+08 | NM_17703 chr12 | 112934811 | 112935418 |
| 5  | 1.13E+08 | 1.13E+08 | DQ167195 chr5  | 112814798 | 112815661 |
| 5  | 1.13E+08 | 1.13E+08 | AF220355 chr5  | 112665396 | 112666005 |
| 5  | 1.13E+08 | 1.13E+08 | AF220355 chr5  | 112662315 | 112663012 |
| 5  | 1.13E+08 | 1.13E+08 | AF220355 chr5  | 112660354 | 112661375 |
| 8  | 1.12E+08 | 1.13E+08 | NM_02004 chr8  | 112503141 | 112503844 |

|    |          |          |                |           |           |
|----|----------|----------|----------------|-----------|-----------|
| 8  | 1.12E+08 | 1.13E+08 | NM_00103 chr8  | 112503141 | 112503844 |
| 6  | 1.12E+08 | 1.12E+08 | NM_17552 chr6  | 112357698 | 112358147 |
| 6  | 1.12E+08 | 1.12E+08 | NM_17552 chr6  | 112356855 | 112357423 |
| 6  | 1.12E+08 | 1.12E+08 | NM_17552 chr6  | 112352367 | 112352989 |
| 9  | 1.12E+08 | 1.12E+08 | NM_03326 chr9  | 112037616 | 112038203 |
| 2  | 1.12E+08 | 1.12E+08 | NM_14688 chr2  | 111552393 | 111552980 |
| 5  | 1.12E+08 | 1.12E+08 | BC002262 chr5  | 111525947 | 111526681 |
| 9  | 1.11E+08 | 1.11E+08 | BC056929 chr9  | 111310447 | 111311037 |
| 9  | 1.11E+08 | 1.11E+08 | NM_17292 chr9  | 111285063 | 111285786 |
| 2  | 1.11E+08 | 1.11E+08 | NM_14639 chr2  | 111055421 | 111056057 |
| 4  | 1.11E+08 | 1.11E+08 | BC051512 chr4  | 110931868 | 110932486 |
| 11 | 1.11E+08 | 1.11E+08 | NM_00842 chr11 | 110876944 | 110877661 |
| 11 | 1.11E+08 | 1.11E+08 | NM_01060 chr11 | 110840551 | 110841147 |
| 12 | 1.11E+08 | 1.11E+08 | NM_17211 chr12 | 110722066 | 110722679 |
| 9  | 1.11E+08 | 1.11E+08 | NM_14622 chr9  | 110694504 | 110695158 |
| 9  | 1.11E+08 | 1.11E+08 | NM_14622 chr9  | 110691826 | 110692466 |
| 9  | 1.11E+08 | 1.11E+08 | NM_14622 chr9  | 110690379 | 110691011 |
| 9  | 1.11E+08 | 1.11E+08 | NM_19947 chr9  | 110671631 | 110672392 |
| 7  | 1.11E+08 | 1.11E+08 | NM_00966 chr7  | 110565636 | 110566323 |
| 7  | 1.11E+08 | 1.11E+08 | NM_00103 chr7  | 110565636 | 110566323 |
| 11 | 1.1E+08  | 1.1E+08  | NM_14722 chr11 | 109981971 | 109982616 |
| 9  | 1.1E+08  | 1.1E+08  | NM_13334 chr9  | 109963165 | 109963787 |
| 9  | 1.1E+08  | 1.1E+08  | BC042645 chr9  | 109892510 | 109893274 |
| 8  | 1.1E+08  | 1.1E+08  | NM_00922 chr8  | 109818259 | 109818912 |
| 13 | 1.1E+08  | 1.1E+08  | BC084675 chr13 | 109787169 | 109787751 |
| 9  | 1.1E+08  | 1.1E+08  | NM_18313 chr9  | 109672827 | 109673287 |
| 9  | 1.1E+08  | 1.1E+08  | NM_18313 chr9  | 109671370 | 109671962 |
| 7  | 1.1E+08  | 1.1E+08  | NM_02061 chr7  | 109577461 | 109578144 |
| 2  | 1.1E+08  | 1.1E+08  | BC034862 chr2  | 109523078 | 109523876 |
| 4  | 1.09E+08 | 1.09E+08 | NM_17229 chr4  | 109478043 | 109478454 |
| 9  | 1.09E+08 | 1.09E+08 | NM_17707 chr9  | 109336860 | 109337559 |
| 8  | 1.09E+08 | 1.09E+08 | NM_01176 chr8  | 109299283 | 109300256 |
| 12 | 1.09E+08 | 1.09E+08 | NM_18132 chr12 | 109285709 | 109286380 |
| 1  | 1.09E+08 | 1.09E+08 | NM_02586 chr1  | 109197772 | 109198838 |
| 11 | 1.09E+08 | 1.09E+08 | NM_01126 chr11 | 109117631 | 109118248 |
| 11 | 1.09E+08 | 1.09E+08 | NM_01126 chr11 | 109112534 | 109113512 |
| X  | 1.09E+08 | 1.09E+08 | NM_18157 chrX  | 108815219 | 108816356 |
| 8  | 1.09E+08 | 1.09E+08 | NM_18159 chr8  | 108769967 | 108770631 |
| 1  | 1.09E+08 | 1.09E+08 | NM_02797 chr1  | 108761586 | 108762179 |
| 11 | 1.09E+08 | 1.09E+08 | NM_01573 chr11 | 108736221 | 108736840 |
| 7  | 1.09E+08 | 1.09E+08 | NM_17553 chr7  | 108719053 | 108720125 |
| 7  | 1.09E+08 | 1.09E+08 | NM_02534 chr7  | 108719053 | 108720125 |
| 7  | 1.09E+08 | 1.09E+08 | NM_20716 chr7  | 108684612 | 108685463 |
| 7  | 1.09E+08 | 1.09E+08 | NM_14630 chr7  | 108670706 | 108671372 |
| 7  | 1.09E+08 | 1.09E+08 | NM_00101 chr7  | 108659284 | 108660212 |
| 7  | 1.09E+08 | 1.09E+08 | NM_14672 chr7  | 108637544 | 108638411 |
| 7  | 1.09E+08 | 1.09E+08 | NM_14672 chr7  | 108636014 | 108636774 |

|    |          |          |                |           |           |
|----|----------|----------|----------------|-----------|-----------|
| 4  | 1.09E+08 | 1.09E+08 | NM_13388 chr4  | 108601168 | 108601772 |
| 1  | 1.09E+08 | 1.09E+08 | NM_00974 chr1  | 108545407 | 108546007 |
| 5  | 1.08E+08 | 1.08E+08 | NM_02848 chr5  | 108372175 | 108372805 |
| 5  | 1.08E+08 | 1.08E+08 | NM_02887 chr5  | 108372175 | 108372805 |
| 8  | 1.08E+08 | 1.08E+08 | NM_02648 chr8  | 108358549 | 108359141 |
| 7  | 1.08E+08 | 1.08E+08 | NM_00101 chr7  | 108331805 | 108332590 |
| 8  | 1.08E+08 | 1.08E+08 | NM_00103 chr8  | 108311990 | 108313055 |
| 3  | 1.08E+08 | 1.08E+08 | NM_17547 chr3  | 108277917 | 108278876 |
| 3  | 1.08E+08 | 1.08E+08 | NM_01035 chr3  | 108143672 | 108144342 |
| 5  | 1.08E+08 | 1.08E+08 | NM_00796 chr5  | 108120119 | 108120464 |
| 7  | 1.08E+08 | 1.08E+08 | NM_14649 chr7  | 108114213 | 108114799 |
| 3  | 1.08E+08 | 1.08E+08 | BC028749 chr3  | 108107399 | 108108375 |
| 3  | 1.08E+08 | 1.08E+08 | BC028749 chr3  | 108104263 | 108104868 |
| 3  | 1.08E+08 | 1.08E+08 | NM_01035 chr3  | 108095337 | 108096114 |
| 9  | 1.08E+08 | 1.08E+08 | NM_00824 chr9  | 107939349 | 107940283 |
| 9  | 1.08E+08 | 1.08E+08 | NM_03254 chr9  | 107939349 | 107940283 |
| 8  | 1.08E+08 | 1.08E+08 | NM_19799 chr8  | 107845972 | 107846523 |
| 8  | 1.08E+08 | 1.08E+08 | NM_17275 chr8  | 107811688 | 107812867 |
| 9  | 1.08E+08 | 1.08E+08 | NM_00907 chr9  | 107766684 | 107767332 |
| 3  | 1.08E+08 | 1.08E+08 | NM_00744 chr3  | 107723695 | 107724300 |
| 3  | 1.08E+08 | 1.08E+08 | NM_02626 chr3  | 107680578 | 107681259 |
| 8  | 1.08E+08 | 1.08E+08 | NM_13396 chr8  | 107622360 | 107622976 |
| 1  | 1.08E+08 | 1.08E+08 | NM_00939 chr1  | 107609333 | 107609966 |
| 9  | 1.08E+08 | 1.08E+08 | NM_00814 chr9  | 107541628 | 107542220 |
| 8  | 1.08E+08 | 1.08E+08 | NM_00766 chr8  | 107516462 | 107517087 |
| 11 | 1.07E+08 | 1.07E+08 | BC060114 chr11 | 107485622 | 107486607 |
| 11 | 1.07E+08 | 1.07E+08 | BC060114 chr11 | 107482988 | 107483592 |
| 9  | 1.07E+08 | 1.07E+08 | NM_00104 chr9  | 107464458 | 107465398 |
| 3  | 1.07E+08 | 1.07E+08 | BC028547 chr3  | 107403395 | 107403989 |
| 7  | 1.07E+08 | 1.07E+08 | NM_17290 chr7  | 107358510 | 107359097 |
| 1  | 1.07E+08 | 1.07E+08 | NM_17877 chr1  | 107180122 | 107181082 |
| 11 | 1.07E+08 | 1.07E+08 | BC028271 chr11 | 107032980 | 107033562 |
| 7  | 1.07E+08 | 1.07E+08 | NM_00100 chr7  | 106957422 | 106958104 |
| 11 | 1.07E+08 | 1.07E+08 | BC060715 chr11 | 106886919 | 106887838 |
| 2  | 1.07E+08 | 1.07E+08 | NM_00804 chr2  | 106864989 | 106865510 |
| 7  | 1.07E+08 | 1.07E+08 | NM_14703 chr7  | 106829244 | 106829873 |
| 7  | 1.07E+08 | 1.07E+08 | NM_14703 chr7  | 106828388 | 106829081 |
| 7  | 1.07E+08 | 1.07E+08 | NM_14703 chr7  | 106768323 | 106769045 |
| 4  | 1.07E+08 | 1.07E+08 | NM_02956 chr4  | 106674358 | 106674893 |
| 4  | 1.07E+08 | 1.07E+08 | NM_02561 chr4  | 106674358 | 106674893 |
| 2  | 1.07E+08 | 1.07E+08 | NM_17711 chr2  | 106618535 | 106619157 |
| 2  | 1.07E+08 | 1.07E+08 | NM_17711 chr2  | 106613504 | 106614333 |
| 7  | 1.07E+08 | 1.07E+08 | NM_14659 chr7  | 106535402 | 106536051 |
| 7  | 1.07E+08 | 1.07E+08 | NM_14659 chr7  | 106507350 | 106507979 |
| 11 | 1.06E+08 | 1.06E+08 | BC057406 chr11 | 106385850 | 106386448 |
| 11 | 1.06E+08 | 1.06E+08 | NM_01049 chr11 | 106198575 | 106199183 |
| 4  | 1.06E+08 | 1.06E+08 | NM_02820 chr4  | 106181512 | 106182102 |

|   |    |          |          |                |           |           |
|---|----|----------|----------|----------------|-----------|-----------|
|   | 9  | 1.06E+08 | 1.06E+08 | NM_02055 chr9  | 106108230 | 106108847 |
|   | 12 | 1.06E+08 | 1.06E+08 | NM_00974 chr12 | 105964671 | 105965533 |
|   | 2  | 1.06E+08 | 1.06E+08 | NM_02387 chr2  | 105710716 | 105711072 |
|   | 12 | 1.06E+08 | 1.06E+08 | NM_01377 chr12 | 105592465 | 105593297 |
|   | 12 | 1.06E+08 | 1.06E+08 | NM_01377 chr12 | 105588019 | 105588822 |
|   | 3  | 1.06E+08 | 1.06E+08 | NM_00103 chr3  | 105576964 | 105577951 |
|   | 12 | 1.06E+08 | 1.06E+08 | NM_01377 chr12 | 105548210 | 105548982 |
|   | 7  | 1.05E+08 | 1.05E+08 | NM_14635 chr7  | 105236575 | 105237190 |
|   | 7  | 1.05E+08 | 1.05E+08 | NM_14706 chr7  | 105211513 | 105212433 |
|   | 3  | 1.05E+08 | 1.05E+08 | BC003236 chr3  | 105170222 | 105170735 |
|   | 7  | 1.05E+08 | 1.05E+08 | NM_14706 chr7  | 105080579 | 105081206 |
|   | 7  | 1.05E+08 | 1.05E+08 | NM_00101 chr7  | 104904535 | 104905257 |
|   | 7  | 1.05E+08 | 1.05E+08 | NM_14709 chr7  | 104904535 | 104905257 |
|   | 7  | 1.05E+08 | 1.05E+08 | NM_20714 chr7  | 104832046 | 104832568 |
|   | 7  | 1.05E+08 | 1.05E+08 | NM_14704 chr7  | 104811918 | 104812626 |
|   | 5  | 1.05E+08 | 1.05E+08 | BC020078 chr5  | 104720640 | 104721311 |
|   | 2  | 1.05E+08 | 1.05E+08 | NM_17869 chr2  | 104653595 | 104654689 |
| X |    | 1.05E+08 | 1.05E+08 | BC099952 chrX  | 104650889 | 104651451 |
|   | 12 | 1.05E+08 | 1.05E+08 | NM_00103 chr12 | 104613765 | 104614351 |
|   | 10 | 1.05E+08 | 1.05E+08 | BC080677 chr10 | 104598521 | 104599133 |
|   | 5  | 1.05E+08 | 1.05E+08 | NM_00831 chr5  | 104539487 | 104540498 |
|   | 12 | 1.05E+08 | 1.05E+08 | NM_17302 chr12 | 104527425 | 104527988 |
|   | 7  | 1.05E+08 | 1.05E+08 | NM_14704 chr7  | 104522441 | 104523304 |
|   | 7  | 1.04E+08 | 1.04E+08 | NM_14637 chr7  | 104459703 | 104460295 |
|   | 5  | 1.04E+08 | 1.04E+08 | NM_01008 chr5  | 104408025 | 104408533 |
|   | 4  | 1.04E+08 | 1.04E+08 | NM_14614 chr4  | 104379601 | 104380293 |
|   | 4  | 1.04E+08 | 1.04E+08 | NM_14614 chr4  | 104372922 | 104373679 |
|   | 5  | 1.04E+08 | 1.04E+08 | NM_01009 chr5  | 104352579 | 104353289 |
|   | 5  | 1.04E+08 | 1.04E+08 | NM_19803 chr5  | 104222581 | 104223231 |
|   | 5  | 1.04E+08 | 1.04E+08 | NM_19803 chr5  | 104216794 | 104217527 |
|   | 9  | 1.04E+08 | 1.04E+08 | NM_20766 chr9  | 104196561 | 104197455 |
|   | 3  | 1.04E+08 | 1.04E+08 | NM_01362 chr3  | 104096991 | 104098191 |
|   | 7  | 1.04E+08 | 1.04E+08 | NM_17290 chr7  | 104043133 | 104043741 |
|   | 11 | 1.04E+08 | 1.04E+08 | NM_00103 chr11 | 104041590 | 104042273 |
|   | 7  | 1.04E+08 | 1.04E+08 | NM_17290 chr7  | 104041040 | 104041938 |
|   | 7  | 1.04E+08 | 1.04E+08 | NM_17290 chr7  | 104039966 | 104040774 |
|   | 7  | 1.04E+08 | 1.04E+08 | NM_14632 chr7  | 103921823 | 103922788 |
|   | 7  | 1.04E+08 | 1.04E+08 | NM_14682 chr7  | 103898713 | 103899875 |
|   | 2  | 1.04E+08 | 1.04E+08 | NM_21243 chr2  | 103826298 | 103827345 |
|   | 5  | 1.04E+08 | 1.04E+08 | D28529 chr5    | 103785518 | 103786297 |
|   | 7  | 1.04E+08 | 1.04E+08 | NM_01361 chr7  | 103770220 | 103770897 |
|   | 3  | 1.04E+08 | 1.04E+08 | NM_01880 chr3  | 103699658 | 103700250 |
|   | 5  | 1.04E+08 | 1.04E+08 | NM_01120 chr5  | 103660625 | 103661235 |
|   | 9  | 1.04E+08 | 1.04E+08 | BC052085 chr9  | 103609168 | 103609762 |
| X |    | 1.04E+08 | 1.04E+08 | NM_00840 chrX  | 103606876 | 103607532 |
|   | 11 | 1.04E+08 | 1.04E+08 | NM_01171 chr11 | 103567094 | 103567955 |
|   | 7  | 1.04E+08 | 1.04E+08 | NM_14712 chr7  | 103536449 | 103537595 |

|    |          |          |                |           |           |
|----|----------|----------|----------------|-----------|-----------|
| 7  | 1.03E+08 | 1.03E+08 | NM_14681 chr7  | 103485514 | 103486213 |
| 6  | 1.03E+08 | 1.03E+08 | NM_00769 chr6  | 103474669 | 103475475 |
| 14 | 1.03E+08 | 1.03E+08 | NM_01114 chr14 | 103359174 | 103359661 |
| 12 | 1.03E+08 | 1.03E+08 | NM_00103 chr12 | 103300274 | 103300943 |
| 2  | 1.03E+08 | 1.03E+08 | NM_01012 chr2  | 103222560 | 103223010 |
| 7  | 1.03E+08 | 1.03E+08 | NM_00100 chr7  | 103125059 | 103125524 |
| 3  | 1.03E+08 | 1.03E+08 | NM_19865 chr3  | 103098495 | 103099175 |
| 2  | 1.03E+08 | 1.03E+08 | AF035527 chr2  | 103087386 | 103088165 |
| 11 | 1.03E+08 | 1.03E+08 | NM_17780 chr11 | 103032022 | 103032475 |
| 5  | 1.03E+08 | 1.03E+08 | BC023344 chr5  | 103009825 | 103010416 |
| 11 | 1.03E+08 | 1.03E+08 | NM_02765 chr11 | 102951138 | 102951749 |
| 15 | 1.03E+08 | 1.03E+08 | NM_00102 chr15 | 102779016 | 102779718 |
| 9  | 1.03E+08 | 1.03E+08 | NM_01364 chr9  | 102690689 | 102691490 |
| 3  | 1.03E+08 | 1.03E+08 | NM_01360 chr3  | 102599848 | 102600534 |
| 7  | 1.03E+08 | 1.03E+08 | NM_14709 chr7  | 102573809 | 102574456 |
| 2  | 1.03E+08 | 1.03E+08 | NM_01139 chr2  | 102505168 | 102506192 |
| 4  | 1.02E+08 | 1.02E+08 | NM_02610 chr4  | 102480461 | 102481445 |
| 7  | 1.02E+08 | 1.02E+08 | NM_14675 chr7  | 102462650 | 102463465 |
| 7  | 1.02E+08 | 1.02E+08 | NM_14707 chr7  | 102406099 | 102407096 |
| 14 | 1.02E+08 | 1.02E+08 | NM_02288 chr14 | 102394763 | 102395834 |
| 15 | 1.02E+08 | 1.02E+08 | NM_00958 chr15 | 102344201 | 102345319 |
| 15 | 1.02E+08 | 1.02E+08 | NM_00931 chr15 | 102344201 | 102345319 |
| 3  | 1.02E+08 | 1.02E+08 | NM_00981 chr3  | 102211211 | 102211843 |
| 3  | 1.02E+08 | 1.02E+08 | NM_17877 chr3  | 102137054 | 102137817 |
| 11 | 1.02E+08 | 1.02E+08 | NM_17294 chr11 | 101999357 | 102000125 |
| 11 | 1.02E+08 | 1.02E+08 | NM_17593 chr11 | 101999357 | 102000125 |
| 15 | 1.02E+08 | 1.02E+08 | NM_14606 chr15 | 101978314 | 101978920 |
| 11 | 1.02E+08 | 1.02E+08 | NM_17805 chr11 | 101958671 | 101959396 |
| 15 | 1.02E+08 | 1.02E+08 | NM_03117 chr15 | 101835870 | 101836527 |
| 15 | 1.02E+08 | 1.02E+08 | NM_03117 chr15 | 101833648 | 101834233 |
| 12 | 1.02E+08 | 1.02E+08 | NM_17302 chr12 | 101807479 | 101808082 |
| 12 | 1.02E+08 | 1.02E+08 | NM_17302 chr12 | 101806500 | 101806966 |
| 15 | 1.02E+08 | 1.02E+08 | NM_00100 chr15 | 101696660 | 101697419 |
| 15 | 1.02E+08 | 1.02E+08 | NM_21372 chr15 | 101619102 | 101619837 |
| 15 | 1.02E+08 | 1.02E+08 | NM_00100 chr15 | 101596886 | 101597446 |
| 13 | 1.02E+08 | 1.02E+08 | NM_02201 chr13 | 101592332 | 101593325 |
| 15 | 1.02E+08 | 1.02E+08 | NM_00847 chr15 | 101525446 | 101526422 |
| 15 | 1.02E+08 | 1.02E+08 | NM_00847 chr15 | 101521367 | 101522830 |
| 15 | 1.01E+08 | 1.01E+08 | NM_13335 chr15 | 101402586 | 101403446 |
| 15 | 1.01E+08 | 1.01E+08 | NM_01066 chr15 | 101299409 | 101299784 |
| 12 | 1.01E+08 | 1.01E+08 | NM_17549 chr12 | 101286722 | 101287572 |
| 15 | 1.01E+08 | 1.01E+08 | NM_02548 chr15 | 101270846 | 101271449 |
| 7  | 1.01E+08 | 1.01E+08 | NM_19809 chr7  | 101266163 | 101266758 |
| 11 | 1.01E+08 | 1.01E+08 | NM_17256 chr11 | 101235461 | 101235885 |
| 9  | 1.01E+08 | 1.01E+08 | BC031532 chr9  | 101003812 | 101004471 |
| 4  | 1.01E+08 | 1.01E+08 | BC064460 chr4  | 100989305 | 100990128 |
| 5  | 1.01E+08 | 1.01E+08 | NM_02797 chr5  | 100918608 | 100919124 |



|   |    |          |          |          |       |           |           |
|---|----|----------|----------|----------|-------|-----------|-----------|
|   | 3  | 1.01E+08 | 1.01E+08 | NM_01076 | chr3  | 100817304 | 100818284 |
|   | 15 | 1.01E+08 | 1.01E+08 | AF049617 | chr15 | 100763764 | 100764614 |
|   | 11 | 1.01E+08 | 1.01E+08 | NM_01148 | chr11 | 100638370 | 100638904 |
|   | 11 | 1.01E+08 | 1.01E+08 | NM_00103 | chr11 | 100524840 | 100526003 |
|   | 15 | 1E+08    | 1E+08    | BC085139 | chr15 | 100422450 | 100423113 |
|   | 15 | 1E+08    | 1E+08    | NM_01012 | chr15 | 100414081 | 100414834 |
|   | 13 | 1E+08    | 1E+08    | NM_00100 | chr13 | 100280644 | 100281570 |
|   | 11 | 1E+08    | 1E+08    | NM_02656 | chr11 | 100262147 | 100262676 |
|   | 15 | 1E+08    | 1E+08    | NM_00873 | chr15 | 100244524 | 100245155 |
|   | 15 | 1E+08    | 1E+08    | NM_00873 | chr15 | 100240235 | 100240854 |
|   | 15 | 1E+08    | 1E+08    | NM_00100 | chr15 | 100191823 | 100192430 |
|   | 15 | 1E+08    | 1E+08    | AB253945 | chr15 | 100161207 | 100161881 |
|   | 11 | 1E+08    | 1E+08    | NM_21248 | chr11 | 100090198 | 100090886 |
|   | 11 | 1E+08    | 1E+08    | NM_01695 | chr11 | 100024195 | 100024969 |
|   | 11 | 1E+08    | 1E+08    | NM_01695 | chr11 | 100023510 | 100024141 |
|   | 15 | 99976430 | 99984929 | NM_17281 | chr15 | 99979475  | 99980141  |
|   | 11 | 99949519 | 99958018 | NM_00846 | chr11 | 99955711  | 99956291  |
|   | 11 | 99919232 | 99927731 | NM_00847 | chr11 | 99923283  | 99924168  |
|   | 11 | 99901704 | 99918315 | NM_01688 | chr11 | 99916034  | 99917913  |
|   | 11 | 99901704 | 99918315 | NM_01688 | chr11 | 99904061  | 99904670  |
|   | 13 | 99790379 | 99800988 | NM_00102 | chr13 | 99791697  | 99792613  |
| X |    | 99726299 | 99734798 | NM_00104 | chrX  | 99732388  | 99733030  |
|   | 11 | 99718010 | 99733373 | NM_02756 | chr11 | 99720705  | 99721672  |
|   | 11 | 99683530 | 99697776 | NM_01574 | chr11 | 99690730  | 99691640  |
|   | 7  | 99635247 | 99643746 | NM_14635 | chr7  | 99635290  | 99635982  |
|   | 6  | 99629730 | 99638234 | NM_02582 | chr6  | 99632787  | 99633397  |
|   | 11 | 99623483 | 99631982 | NM_02708 | chr11 | 99625907  | 99626453  |
|   | 7  | 99603228 | 99611727 | NM_14706 | chr7  | 99604208  | 99604905  |
|   | 7  | 99582924 | 99591423 | NM_17531 | chr7  | 99590418  | 99590918  |
|   | 13 | 99448412 | 99456911 | NM_00824 | chr13 | 99448403  | 99449015  |
|   | 9  | 99416796 | 99425295 | NM_00107 | chr9  | 99423521  | 99424391  |
|   | 15 | 99401090 | 99409605 | NM_00969 | chr15 | 99404389  | 99405080  |
|   | 15 | 99353203 | 99362051 | NM_02822 | chr15 | 99353763  | 99354378  |
|   | 11 | 99306695 | 99315214 | NM_03337 | chr11 | 99309164  | 99310104  |
|   | 9  | 99243557 | 99252056 | NM_00862 | chr9  | 99248863  | 99249542  |
|   | 7  | 99224680 | 99233197 | NM_00982 | chr7  | 99225137  | 99225726  |
|   | 11 | 99136532 | 99145041 | NM_13373 | chr11 | 99144394  | 99144997  |
|   | 11 | 99136532 | 99145041 | NM_13373 | chr11 | 99139084  | 99139832  |
|   | 5  | 99088741 | 99097627 | NM_17340 | chr5  | 99090071  | 99090972  |
|   | 11 | 99044024 | 99053107 | NM_02061 | chr11 | 99048468  | 99049106  |
| X |    | 98999682 | 99009451 | BC116811 | chrX  | 99007038  | 99007916  |
| X |    | 98999682 | 99009451 | BC116811 | chrX  | 99001025  | 99002057  |
|   | 11 | 98968660 | 98977167 | NM_00771 | chr11 | 98970428  | 98971243  |
|   | 11 | 98968660 | 98977167 | NM_00771 | chr11 | 98968667  | 98969562  |
|   | 15 | 98921518 | 98930017 | NM_17683 | chr15 | 98927568  | 98928059  |
|   | 15 | 98759922 | 98768458 | NM_01165 | chr15 | 98765000  | 98765619  |
|   | 13 | 98588956 | 98597455 | BC054101 | chr13 | 98594901  | 98595498  |

|    |          |          |          |       |          |          |
|----|----------|----------|----------|-------|----------|----------|
| 4  | 98484480 | 98492979 | BC006868 | chr4  | 98490053 | 98490592 |
| 15 | 98308218 | 98316717 | NM_01067 | chr15 | 98312677 | 98313100 |
| 3  | 98301558 | 98310077 | NM_02632 | chr3  | 98307816 | 98308404 |
| 4  | 98307056 | 98318342 | NM_17287 | chr4  | 98307673 | 98308332 |
| 15 | 98278319 | 98286818 | NM_14628 | chr15 | 98283076 | 98283648 |
| 5  | 98268765 | 98277264 | NM_13373 | chr5  | 98275928 | 98276514 |
| 13 | 98197496 | 98206019 | BC083078 | chr13 | 98205255 | 98205985 |
| 15 | 98166474 | 98174973 | NM_14628 | chr15 | 98168533 | 98169224 |
| 15 | 98139083 | 98147582 | NM_00101 | chr15 | 98144927 | 98145527 |
| 16 | 98105073 | 98113572 | BC027135 | chr16 | 98111351 | 98112037 |
| 16 | 98075014 | 98083537 | NM_17484 | chr16 | 98081722 | 98082357 |
| 16 | 98075014 | 98083537 | NM_17484 | chr16 | 98075928 | 98076342 |
| 8  | 98029170 | 98037669 | NM_01063 | chr8  | 98036818 | 98037441 |
| 4  | 98032652 | 98041490 | NM_00770 | chr4  | 98035361 | 98036204 |
| 3  | 97951218 | 97959717 | NM_17714 | chr3  | 97954692 | 97955455 |
| 9  | 97840020 | 97848519 | NM_02231 | chr9  | 97846515 | 97847288 |
| 7  | 97789147 | 97797646 | NM_17769 | chr7  | 97795179 | 97796145 |
| 7  | 97789147 | 97797646 | NM_17769 | chr7  | 97794067 | 97794662 |
| 15 | 97786313 | 97794812 | NM_20135 | chr15 | 97786653 | 97787480 |
| 8  | 97757764 | 97771431 | NM_05324 | chr8  | 97764520 | 97765123 |
| 15 | 97733799 | 97742330 | NM_00950 | chr15 | 97734907 | 97735607 |
| 16 | 97657300 | 97665852 | NM_02062 | chr16 | 97660043 | 97661122 |
| 8  | 97655309 | 97663874 | NM_00914 | chr8  | 97659575 | 97660186 |
| 16 | 97657300 | 97665852 | NM_02062 | chr16 | 97657697 | 97658324 |
| 7  | 97449098 | 97457597 | BC085127 | chr7  | 97454731 | 97455365 |
| 7  | 97452108 | 97460644 | NM_18325 | chr7  | 97454731 | 97455365 |
| 7  | 97386814 | 97395313 | BC013813 | chr7  | 97392361 | 97392989 |
| 1  | 97323003 | 97331504 | BC037146 | chr1  | 97328833 | 97329534 |
| 6  | 97274984 | 97283483 | BC058262 | chr6  | 97281058 | 97281759 |
| 15 | 97183047 | 97191546 | BC038822 | chr15 | 97184777 | 97185427 |
| 1  | 97138029 | 97146649 | NM_02632 | chr1  | 97144440 | 97145043 |
| 3  | 97111821 | 97120320 | NM_00812 | chr3  | 97115439 | 97116531 |
| 10 | 97030871 | 97039396 | NM_00843 | chr10 | 97038071 | 97038672 |
| 10 | 96989491 | 96998017 | NM_00852 | chr10 | 96995376 | 96996024 |
| 3  | 96909531 | 96918030 | NM_02151 | chr3  | 96917108 | 96917939 |
| 3  | 96909531 | 96918030 | NM_02151 | chr3  | 96913447 | 96914198 |
| 3  | 96909531 | 96918030 | NM_02151 | chr3  | 96910313 | 96910997 |
| 15 | 96881491 | 96889990 | NM_02705 | chr15 | 96887836 | 96888777 |
| 13 | 96791619 | 96800155 | NM_01017 | chr13 | 96793500 | 96794130 |
| 9  | 96698966 | 96707493 | BC083076 | chr9  | 96700262 | 96700940 |
| 16 | 96545994 | 96554524 | NM_00840 | chr16 | 96546658 | 96547524 |
| 16 | 96379942 | 96388441 | NM_03314 | chr16 | 96386410 | 96387051 |
| 11 | 96127255 | 96137328 | NM_01045 | chr11 | 96132584 | 96133349 |
| 8  | 96084380 | 96092932 | NM_05320 | chr8  | 96089318 | 96090098 |
| 13 | 95970326 | 95978825 | NM_01102 | chr13 | 95977226 | 95977851 |
| 13 | 95970326 | 95978825 | NM_01102 | chr13 | 95974944 | 95975716 |
| 5  | 95707855 | 95724394 | BC099941 | chr5  | 95720005 | 95720785 |

|    |          |          |          |       |          |          |
|----|----------|----------|----------|-------|----------|----------|
| 1  | 95628371 | 95636888 | NM_02545 | chr1  | 95634230 | 95635127 |
| 1  | 95629780 | 95638311 | NM_02313 | chr1  | 95634230 | 95635127 |
| 3  | 95606190 | 95614780 | NM_02128 | chr3  | 95611464 | 95612093 |
| 8  | 95557530 | 95566029 | NM_02242 | chr8  | 95562833 | 95563227 |
| 9  | 95440980 | 95449606 | NM_02962 | chr9  | 95443898 | 95444821 |
| 13 | 95383481 | 95391980 | NM_02915 | chr13 | 95391038 | 95391619 |
| 1  | 95198302 | 95206835 | NM_20703 | chr1  | 95198372 | 95199067 |
| 3  | 95033539 | 95042918 | NM_01739 | chr3  | 95041138 | 95041722 |
| 16 | 94962971 | 94971488 | NM_00102 | chr16 | 94970257 | 94971186 |
| 13 | 94772533 | 94781052 | NM_02288 | chr13 | 94778002 | 94778856 |
| 10 | 94750154 | 94759785 | NM_00995 | chr10 | 94750530 | 94751359 |
| 1  | 94731395 | 94744310 | NM_18140 | chr1  | 94741500 | 94742105 |
| 4  | 94537889 | 94550205 | NM_01059 | chr4  | 94537898 | 94538497 |
| 3  | 94492700 | 94501221 | NM_02830 | chr3  | 94492785 | 94493567 |
| 3  | 94478623 | 94487212 | NM_17725 | chr3  | 94483821 | 94484418 |
| 3  | 94452190 | 94465408 | NM_01128 | chr3  | 94460521 | 94461166 |
| 1  | 94444287 | 94452786 | NM_20689 | chr1  | 94447070 | 94447824 |
| 1  | 94432245 | 94440744 | NM_14649 | chr1  | 94435453 | 94436562 |
| 1  | 94432245 | 94440744 | NM_14649 | chr1  | 94432280 | 94433177 |
| 1  | 94412738 | 94429426 | NM_14649 | chr1  | 94424236 | 94424895 |
| 1  | 94339970 | 94348469 | NM_14703 | chr1  | 94343290 | 94344404 |
| 8  | 94197637 | 94206163 | NM_01193 | chr8  | 94203357 | 94204376 |
| 8  | 94200868 | 94209367 | NM_17343 | chr8  | 94203357 | 94204376 |
| 16 | 93894878 | 93903377 | NM_01950 | chr16 | 93894911 | 93896173 |
| 5  | 93878592 | 93887144 | NM_00107 | chr5  | 93883168 | 93883799 |
| 5  | 93882193 | 93890692 | NM_00103 | chr5  | 93883168 | 93883799 |
| 5  | 93878592 | 93887144 | NM_00107 | chr5  | 93879382 | 93880171 |
| 17 | 93497312 | 93506212 | NM_00962 | chr17 | 93499886 | 93500477 |
| 5  | 93457343 | 93465842 | NM_18172 | chr5  | 93462930 | 93463711 |
| 5  | 93400768 | 93409317 | NM_00859 | chr5  | 93402032 | 93403011 |
| 5  | 93382675 | 93391224 | NM_17271 | chr5  | 93384921 | 93385460 |
| 3  | 93071629 | 93080128 | NM_00101 | chr3  | 93078884 | 93079719 |
| 3  | 93009134 | 93017633 | NM_00103 | chr3  | 93011318 | 93012162 |
| 3  | 92934190 | 92942689 | NM_02862 | chr3  | 92941388 | 92941983 |
| 3  | 92934190 | 92942689 | NM_02862 | chr3  | 92935634 | 92936630 |
| 11 | 92908500 | 92918687 | NM_02829 | chr11 | 92916263 | 92916907 |
| 3  | 92861803 | 92870302 | NM_02966 | chr3  | 92866296 | 92866923 |
| 16 | 92712052 | 92720551 | BC069929 | chr16 | 92718378 | 92718967 |
| 1  | 92605385 | 92613902 | BC057903 | chr1  | 92612781 | 92613595 |
| 10 | 92584689 | 92593188 | BC064815 | chr10 | 92591588 | 92592198 |
| 16 | 92583688 | 92592187 | NM_00982 | chr16 | 92583678 | 92584281 |
| 3  | 92511985 | 92520484 | NM_01147 | chr3  | 92513603 | 92514532 |
| 3  | 92512314 | 92520826 | BC031517 | chr3  | 92513603 | 92514532 |
| 5  | 92475520 | 92484113 | NM_00756 | chr5  | 92475518 | 92476436 |
| 1  | 92427385 | 92436412 | NM_13380 | chr1  | 92434668 | 92435611 |
| 13 | 92348625 | 92357124 | NM_19841 | chr13 | 92349889 | 92350945 |
| 16 | 92207801 | 92216300 | NM_02925 | chr16 | 92213006 | 92213703 |

|    |          |          |          |       |          |          |
|----|----------|----------|----------|-------|----------|----------|
| 16 | 92207801 | 92216300 | NM_02925 | chr16 | 92211082 | 92211885 |
| 13 | 92209757 | 92218259 | NM_02879 | chr13 | 92210749 | 92211398 |
| 5  | 91837718 | 91850212 | NM_02378 | chr5  | 91842870 | 91843498 |
| 2  | 91822471 | 91831009 | NM_01195 | chr2  | 91827944 | 91828606 |
| 1  | 91759474 | 91768347 | NM_01026 | chr1  | 91761462 | 91762369 |
| 13 | 91680174 | 91688673 | BC023455 | chr13 | 91687309 | 91687976 |
| 16 | 91505353 | 91513852 | NM_13866 | chr16 | 91511298 | 91512483 |
| 2  | 90993351 | 91001955 | NM_01383 | chr2  | 90997221 | 90997982 |
| 2  | 90997758 | 91006268 | NM_00738 | chr2  | 90997221 | 90997982 |
| 8  | 90783341 | 90791840 | AY147407 | chr8  | 90786419 | 90787078 |
| 8  | 90746919 | 90755418 | AF188609 | chr8  | 90750657 | 90751307 |
| 5  | 90637006 | 90645505 | AF330054 | chr5  | 90643449 | 90644133 |
| 3  | 90548942 | 90558265 | NM_00872 | chr3  | 90555201 | 90555749 |
| 6  | 90292810 | 90301309 | NM_14494 | chr6  | 90300506 | 90301225 |
| 7  | 90249838 | 90265133 | NM_00104 | chr7  | 90254384 | 90255071 |
| 6  | 90187443 | 90195942 | NM_05322 | chr6  | 90189378 | 90190103 |
| 6  | 90138220 | 90146719 | NM_05322 | chr6  | 90143592 | 90144653 |
| 6  | 90066779 | 90075278 | NM_05322 | chr6  | 90072283 | 90073453 |
| 6  | 90066779 | 90075278 | NM_05322 | chr6  | 90069839 | 90070436 |
| 2  | 90064768 | 90073267 | NM_14679 | chr2  | 90068895 | 90069586 |
| 16 | 90030129 | 90038628 | BC065126 | chr16 | 90032371 | 90033441 |
| 6  | 89999846 | 90008345 | NM_05321 | chr6  | 90006987 | 90007578 |
| 10 | 89999526 | 90009385 | BC098373 | chr10 | 90006403 | 90007026 |
| 2  | 89937535 | 89946034 | NM_01098 | chr2  | 89942995 | 89943930 |
| 6  | 89935675 | 89944174 | NM_05322 | chr6  | 89941655 | 89942275 |
| 2  | 89937535 | 89946034 | NM_01098 | chr2  | 89940628 | 89941378 |
| 1  | 89920249 | 89940532 | NM_20164 | chr1  | 89934688 | 89935582 |
| 1  | 89920249 | 89940532 | NM_20164 | chr1  | 89930877 | 89931440 |
| 6  | 89852778 | 89861277 | NM_05322 | chr6  | 89859854 | 89860508 |
| 6  | 89833534 | 89842033 | NM_05322 | chr6  | 89840841 | 89841473 |
| 6  | 89833534 | 89842033 | NM_05322 | chr6  | 89835370 | 89836342 |
| 17 | 89816245 | 89824755 | D55720   | chr17 | 89816472 | 89817152 |
| 2  | 89809730 | 89818229 | NM_14679 | chr2  | 89814048 | 89814655 |
| 6  | 89808620 | 89817119 | NM_05322 | chr6  | 89810477 | 89811073 |
| 6  | 89705928 | 89714485 | NM_05323 | chr6  | 89711706 | 89712754 |
| 6  | 89705928 | 89714485 | NM_05323 | chr6  | 89708466 | 89709419 |
| 6  | 89673844 | 89682343 | NM_05322 | chr6  | 89679748 | 89680457 |
| 15 | 89667070 | 89675573 | NM_01880 | chr15 | 89674138 | 89674800 |
| 15 | 89667070 | 89675573 | NM_01880 | chr15 | 89672992 | 89673940 |
| 8  | 89633540 | 89642111 | NM_00917 | chr8  | 89636540 | 89637151 |
| 3  | 89600348 | 89608848 | NM_08046 | chr3  | 89605637 | 89606226 |
| 3  | 89534468 | 89547742 | NM_02678 | chr3  | 89536778 | 89537580 |
| 7  | 89501914 | 89510509 | NM_18140 | chr7  | 89503239 | 89503867 |
| 1  | 89445533 | 89454106 | NM_01056 | chr1  | 89452988 | 89453658 |
| 1  | 89419721 | 89428220 | NM_01575 | chr1  | 89421435 | 89422254 |
| 15 | 89390093 | 89399607 | NM_01345 | chr15 | 89395932 | 89396672 |
| 7  | 89390279 | 89398778 | NM_02961 | chr7  | 89392416 | 89393206 |

|    |          |          |          |       |          |          |
|----|----------|----------|----------|-------|----------|----------|
| 1  | 89311385 | 89319884 | BC022680 | chr1  | 89313168 | 89313846 |
| 12 | 89302456 | 89310955 | BC060719 | chr12 | 89306439 | 89307103 |
| 12 | 89302456 | 89310955 | BC060719 | chr12 | 89302451 | 89303030 |
| 1  | 89295434 | 89303934 | BC115670 | chr1  | 89301854 | 89302858 |
| 15 | 89250615 | 89263666 | NM_00994 | chr15 | 89253804 | 89254816 |
| 15 | 89251290 | 89259789 | NM_17690 | chr15 | 89253804 | 89254816 |
| 5  | 89155117 | 89163653 | NM_02128 | chr5  | 89159438 | 89160144 |
| 5  | 88956044 | 88964543 | NM_02712 | chr5  | 88963169 | 88963812 |
| 3  | 88891564 | 88908824 | BC059914 | chr3  | 88899178 | 88900045 |
| 5  | 88876685 | 88886955 | NM_00997 | chr5  | 88884779 | 88885375 |
| 15 | 88881870 | 88890369 | NM_00100 | chr15 | 88882097 | 88882902 |
| 6  | 88860659 | 88870341 | NM_00856 | chr6  | 88869420 | 88870133 |
| 6  | 88861892 | 88874085 | NM_01190 | chr6  | 88869420 | 88870133 |
| 15 | 88842077 | 88850576 | AY303754 | chr15 | 88843150 | 88843823 |
| 16 | 88810577 | 88827123 | NM_13335 | chr16 | 88811918 | 88812636 |
| 15 | 88803820 | 88812773 | NM_13324 | chr15 | 88808512 | 88809653 |
| 15 | 88807324 | 88815823 | NM_03126 | chr15 | 88808512 | 88809653 |
| 5  | 88663614 | 88672155 | NM_02313 | chr5  | 88665508 | 88666093 |
| 16 | 88611721 | 88620220 | NM_18318 | chr16 | 88618953 | 88619800 |
| 16 | 88611721 | 88620220 | NM_18318 | chr16 | 88615893 | 88616494 |
| 17 | 88571003 | 88582018 | NM_02363 | chr17 | 88578964 | 88579548 |
| 3  | 88462127 | 88476391 | NM_00754 | chr3  | 88469013 | 88469617 |
| 17 | 88432584 | 88441083 | NM_02865 | chr17 | 88432811 | 88433410 |
| 3  | 88404950 | 88413493 | NM_02000 | chr3  | 88411557 | 88412160 |
| 7  | 88299465 | 88308004 | NM_02823 | chr7  | 88301721 | 88302795 |
| 4  | 88281459 | 88301078 | NM_00833 | chr4  | 88295189 | 88296010 |
| 2  | 88201272 | 88209771 | NM_14691 | chr2  | 88202031 | 88202890 |
| 10 | 88194422 | 88202921 | AB052760 | chr10 | 88200114 | 88201010 |
| 1  | 88187947 | 88196626 | NM_01088 | chr1  | 88190674 | 88191300 |
| 4  | 88145588 | 88168499 | NM_00833 | chr4  | 88165732 | 88166429 |
| 8  | 87944233 | 87975939 | NM_01076 | chr8  | 87957323 | 87957984 |
| 3  | 87876989 | 87885488 | NM_01183 | chr3  | 87879110 | 87879718 |
| 2  | 87784925 | 87793451 | NM_14664 | chr2  | 87789637 | 87790344 |
| 11 | 87703590 | 87716117 | NM_14641 | chr11 | 87703714 | 87704378 |
| 11 | 87639806 | 87648310 | NM_08042 | chr11 | 87644861 | 87645523 |
| 3  | 87515700 | 87524208 | NM_18322 | chr3  | 87521804 | 87522393 |
| 6  | 87459442 | 87467941 | NM_17547 | chr6  | 87466501 | 87467213 |
| 11 | 87389185 | 87399825 | NM_01112 | chr11 | 87398271 | 87398948 |
| 6  | 87332991 | 87341509 | NM_02546 | chr6  | 87338859 | 87339940 |
| 14 | 87312825 | 87324675 | NM_17868 | chr14 | 87315755 | 87316353 |
| 6  | 87298850 | 87307354 | NM_05404 | chr6  | 87301683 | 87302331 |
| 17 | 87010005 | 87018504 | NM_01965 | chr17 | 87017012 | 87018140 |
| 14 | 86958346 | 86966850 | BC039659 | chr14 | 86966189 | 86966824 |
| 10 | 86945736 | 86954272 | NM_00877 | chr10 | 86953443 | 86954060 |
| 18 | 86839303 | 86849740 | NM_17263 | chr18 | 86843591 | 86844247 |
| 11 | 86785705 | 86794204 | AB098741 | chr11 | 86787736 | 86788516 |
| 3  | 86631453 | 86640556 | NM_01183 | chr3  | 86636113 | 86636982 |

|    |          |          |          |       |          |          |
|----|----------|----------|----------|-------|----------|----------|
| 6  | 86587808 | 86596307 | DQ841260 | chr6  | 86589834 | 86590614 |
| 2  | 86456796 | 86465295 | NM_14659 | chr2  | 86460443 | 86461032 |
| 8  | 86425198 | 86433697 | NM_14627 | chr8  | 86429337 | 86429853 |
| 7  | 86237597 | 86246096 | NM_14661 | chr7  | 86240556 | 86241297 |
| 12 | 86063889 | 86072388 | NM_00882 | chr12 | 86068280 | 86069084 |
| 2  | 85997090 | 86005589 | NM_14701 | chr2  | 86002627 | 86003436 |
| 6  | 85976825 | 85985324 | NM_01201 | chr6  | 85983742 | 85984361 |
| 6  | 85875372 | 85897258 | NM_17684 | chr6  | 85878167 | 85878946 |
| 6  | 85878742 | 85887295 | NM_02316 | chr6  | 85878167 | 85878946 |
| 4  | 85808015 | 85816523 | NM_17254 | chr4  | 85815202 | 85815826 |
| 6  | 85803527 | 85812026 | AB024935 | chr6  | 85806944 | 85807545 |
| 11 | 85700258 | 85708757 | NM_01153 | chr11 | 85707574 | 85708622 |
| 2  | 85446659 | 85471294 | NM_01372 | chr2  | 85467376 | 85467994 |
| 6  | 85466045 | 85474652 | NM_00100 | chr6  | 85467085 | 85467707 |
| 2  | 85446659 | 85471294 | NM_01372 | chr2  | 85449245 | 85450139 |
| 12 | 85286662 | 85304777 | NM_00102 | chr12 | 85292298 | 85292893 |
| 12 | 85292862 | 85309506 | NM_02837 | chr12 | 85292298 | 85292893 |
| 5  | 85191793 | 85200292 | BC083085 | chr5  | 85198214 | 85199175 |
| 3  | 85032138 | 85040715 | NM_08042 | chr3  | 85038877 | 85039736 |
| 15 | 85027777 | 85036345 | NM_01018 | chr15 | 85029444 | 85030159 |
| 15 | 85027777 | 85036345 | NM_01018 | chr15 | 85028311 | 85029357 |
| 17 | 84996035 | 85004547 | NM_14598 | chr17 | 85002814 | 85003991 |
| 2  | 84995039 | 85003538 | NM_00103 | chr2  | 84996665 | 84997278 |
| 15 | 84953844 | 84962439 | BC112373 | chr15 | 84962388 | 84963324 |
| 15 | 84957224 | 84965723 | NM_08047 | chr15 | 84962388 | 84963324 |
| 2  | 84931225 | 84939724 | NM_01178 | chr2  | 84933612 | 84934397 |
| 12 | 84834405 | 84842917 | NM_02363 | chr12 | 84836485 | 84837139 |
| 2  | 84832040 | 84840610 | NM_18299 | chr2  | 84832851 | 84833614 |
| 16 | 84711709 | 84726502 | NM_00806 | chr16 | 84722902 | 84723704 |
| 16 | 84715667 | 84724166 | NM_01675 | chr16 | 84722902 | 84723704 |
| 12 | 84665722 | 84674221 | BC005747 | chr12 | 84673652 | 84674180 |
| 17 | 84585457 | 84593956 | NM_02618 | chr17 | 84586176 | 84586729 |
| 12 | 84409831 | 84418330 | NM_03024 | chr12 | 84412384 | 84413086 |
| 15 | 84379517 | 84391589 | NM_17763 | chr15 | 84383197 | 84383978 |
| 12 | 84327169 | 84335668 | BC048572 | chr12 | 84334884 | 84335496 |
| 12 | 84327169 | 84335668 | BC048572 | chr12 | 84329685 | 84330464 |
| 3  | 84296266 | 84312788 | NM_03070 | chr3  | 84310748 | 84311338 |
| 2  | 84173698 | 84183322 | NM_01878 | chr2  | 84179252 | 84179910 |
| 7  | 84025579 | 84034078 | NM_13372 | chr7  | 84026462 | 84027052 |
| 11 | 83981172 | 83989671 | NM_00103 | chr11 | 83988481 | 83989280 |
| 10 | 83867771 | 83876270 | NM_00100 | chr10 | 83872730 | 83873640 |
| 11 | 83774666 | 83783165 | NM_19434 | chr11 | 83777747 | 83778342 |
| 2  | 83739546 | 83748065 | NM_02796 | chr2  | 83742398 | 83743160 |
| 7  | 83668512 | 83677018 | NM_02933 | chr7  | 83672108 | 83672698 |
| 6  | 83619235 | 83627774 | NM_01675 | chr6  | 83625353 | 83626269 |
| 2  | 83607567 | 83616066 | NM_17551 | chr2  | 83615017 | 83615895 |
| 15 | 83601789 | 83610288 | NM_17261 | chr15 | 83602993 | 83603626 |

|    |          |          |          |       |          |          |
|----|----------|----------|----------|-------|----------|----------|
| 12 | 83529886 | 83538681 | NM_01581 | chr12 | 83537659 | 83538271 |
| 12 | 83529886 | 83538681 | NM_01581 | chr12 | 83535664 | 83536543 |
| 6  | 83490638 | 83507890 | NM_00961 | chr6  | 83497506 | 83497935 |
| 6  | 83490638 | 83507890 | NM_00961 | chr6  | 83492464 | 83493088 |
| 11 | 83335871 | 83352713 | NM_00104 | chr11 | 83348486 | 83349079 |
| 12 | 83169433 | 83177932 | NM_17257 | chr12 | 83170354 | 83171003 |
| 1  | 83032786 | 83041285 | NM_02772 | chr1  | 83039676 | 83040470 |
| 1  | 83032786 | 83041285 | NM_02772 | chr1  | 83036224 | 83036633 |
| 11 | 82985381 | 82995297 | NM_01141 | chr11 | 82989429 | 82990287 |
| 11 | 82927040 | 82935543 | NM_01140 | chr11 | 82930508 | 82931114 |
| 15 | 82921979 | 82930496 | NM_02347 | chr15 | 82926152 | 82926986 |
| 1  | 82914956 | 82923472 | NM_03055 | chr1  | 82916112 | 82916833 |
| 11 | 82845988 | 82862728 | NM_18154 | chr11 | 82851532 | 82852184 |
| 11 | 82845988 | 82862728 | NM_18154 | chr11 | 82850388 | 82851024 |
| 11 | 82834470 | 82843005 | NM_18154 | chr11 | 82838421 | 82839067 |
| 11 | 82834470 | 82843005 | NM_18154 | chr11 | 82836060 | 82836701 |
| 10 | 82784037 | 82792551 | NM_02657 | chr10 | 82788525 | 82789335 |
| 10 | 82784037 | 82792551 | NM_02657 | chr10 | 82786853 | 82787237 |
| 12 | 82772878 | 82781377 | NM_01881 | chr12 | 82773359 | 82774123 |
| 11 | 82762297 | 82773437 | NM_18320 | chr11 | 82769075 | 82769643 |
| 15 | 82680197 | 82691014 | U20282   | chr15 | 82686244 | 82686918 |
| 15 | 82619501 | 82628011 | NM_02956 | chr15 | 82623109 | 82623946 |
| 18 | 82603551 | 82612119 | NM_00102 | chr18 | 82610354 | 82611433 |
| 15 | 82589389 | 82597949 | BC087906 | chr15 | 82591227 | 82591826 |
| 18 | 82538706 | 82547205 | NM_00808 | chr18 | 82545034 | 82545739 |
| 4  | 82520899 | 82529398 | AB160986 | chr4  | 82527944 | 82528605 |
| 15 | 82515325 | 82524265 | BC059104 | chr15 | 82522415 | 82523137 |
| 4  | 82520899 | 82529398 | AB160986 | chr4  | 82520959 | 82521704 |
| 15 | 82467292 | 82475791 | NM_13369 | chr15 | 82472265 | 82472887 |
| 1  | 82463317 | 82471816 | NM_00773 | chr1  | 82469932 | 82470553 |
| 15 | 82467292 | 82475791 | NM_13369 | chr15 | 82469084 | 82469812 |
| 1  | 82460000 | 82468499 | NM_00773 | chr1  | 82467012 | 82468036 |
| 1  | 82463317 | 82471816 | NM_00773 | chr1  | 82467012 | 82468036 |
| 15 | 82446174 | 82454673 | NM_14547 | chr15 | 82447685 | 82448581 |
| 4  | 82403642 | 82412141 | BC088732 | chr4  | 82410980 | 82411653 |
| 4  | 82403642 | 82412141 | BC088732 | chr4  | 82404928 | 82405579 |
| 4  | 82353856 | 82362382 | NM_00988 | chr4  | 82360577 | 82361363 |
| 4  | 82353856 | 82362382 | NM_00988 | chr4  | 82353919 | 82354669 |
| 1  | 82315981 | 82324480 | BC004711 | chr1  | 82320039 | 82320737 |
| 15 | 82274158 | 82285833 | NM_01000 | chr15 | 82280717 | 82281308 |
| 15 | 82232437 | 82240946 | NM_01000 | chr15 | 82233801 | 82235259 |
| 11 | 82199095 | 82207594 | NM_02343 | chr11 | 82201088 | 82201465 |
| 13 | 82045478 | 82053977 | AF405693 | chr13 | 82051208 | 82052304 |
| 13 | 82008219 | 82016718 | AF405694 | chr13 | 82011516 | 82012125 |
| 15 | 81903719 | 81912218 | AY270177 | chr15 | 81907265 | 81908439 |
| 11 | 81868046 | 81876640 | NM_01133 | chr11 | 81873399 | 81874262 |
| 11 | 81855909 | 81864444 | NM_01365 | chr11 | 81862170 | 81862804 |

|   |    |          |          |          |       |          |          |
|---|----|----------|----------|----------|-------|----------|----------|
|   | 13 | 81818152 | 81826651 | BC043465 | chr13 | 81820299 | 81820947 |
|   | 7  | 81805060 | 81813972 | NM_01388 | chr7  | 81805713 | 81806425 |
|   | 15 | 81758150 | 81766695 | NM_14547 | chr15 | 81763259 | 81763867 |
|   | 15 | 81668455 | 81692051 | NM_02050 | chr15 | 81676954 | 81677620 |
|   | 8  | 81380025 | 81388545 | BC002088 | chr8  | 81383701 | 81384403 |
|   | 3  | 81116343 | 81125666 | NM_01997 | chr3  | 81119606 | 81120240 |
|   | 8  | 81103414 | 81111913 | NM_18309 | chr8  | 81106277 | 81106878 |
|   | 11 | 80966497 | 80975098 | NM_00738 | chr11 | 80970486 | 80971558 |
|   | 17 | 80932974 | 80941473 | BC065413 | chr17 | 80934004 | 80934925 |
|   | 8  | 80618009 | 80626524 | NM_01033 | chr8  | 80622041 | 80623079 |
|   | 15 | 80393849 | 80402348 | BC052496 | chr15 | 80393479 | 80394085 |
|   | 10 | 80301396 | 80315521 | NM_01389 | chr10 | 80315427 | 80316027 |
|   | 17 | 80192538 | 80205340 | NM_19426 | chr17 | 80200217 | 80200812 |
|   | 17 | 80195965 | 80204802 | NM_19894 | chr17 | 80200217 | 80200812 |
|   | 12 | 80184754 | 80193253 | BC048379 | chr12 | 80190562 | 80191194 |
|   | 3  | 79965915 | 79974587 | NM_13318 | chr3  | 79966742 | 79967335 |
|   | 10 | 79939720 | 79948253 | NM_02609 | chr10 | 79944319 | 79945002 |
|   | 15 | 79839231 | 79848063 | NM_01105 | chr15 | 79847358 | 79848027 |
|   | 7  | 79806277 | 79814777 | NM_02742 | chr7  | 79810874 | 79811215 |
| X |    | 79738144 | 79746643 | AB032764 | chrX  | 79740138 | 79740748 |
|   | 10 | 79721145 | 79738602 | NM_00879 | chr10 | 79727905 | 79728725 |
|   | 10 | 79727287 | 79735798 | NM_13929 | chr10 | 79727905 | 79728725 |
|   | 1  | 79548488 | 79556996 | NM_18302 | chr1  | 79548905 | 79549947 |
|   | 2  | 79502619 | 79511156 | NM_17242 | chr2  | 79510535 | 79510967 |
|   | 2  | 79453095 | 79461594 | BC018526 | chr2  | 79459749 | 79460352 |
|   | 2  | 79439450 | 79447949 | BC008560 | chr2  | 79444960 | 79445597 |
|   | 11 | 79401407 | 79409906 | NM_17554 | chr11 | 79401424 | 79402103 |
|   | 10 | 79394744 | 79403243 | NM_01385 | chr10 | 79396135 | 79396922 |
|   | 15 | 79337723 | 79346229 | NM_13409 | chr15 | 79339314 | 79340130 |
|   | 15 | 79266755 | 79275257 | NM_01376 | chr15 | 79270313 | 79271012 |
|   | 7  | 79255795 | 79264298 | NM_02059 | chr7  | 79256207 | 79256974 |
|   | 18 | 79246519 | 79255018 | NM_05309 | chr18 | 79253486 | 79254390 |
|   | 18 | 79246519 | 79255018 | NM_05309 | chr18 | 79249412 | 79250028 |
|   | 15 | 79142768 | 79151267 | AF259401 | chr15 | 79143905 | 79144921 |
|   | 10 | 79113763 | 79122262 | NM_00822 | chr10 | 79117827 | 79118473 |
|   | 10 | 79038405 | 79054867 | NM_00103 | chr10 | 79050943 | 79051450 |
|   | 15 | 78988525 | 78998495 | BC023356 | chr15 | 78990135 | 78990913 |
|   | 16 | 78971185 | 78979689 | NM_00894 | chr16 | 78973334 | 78973938 |
|   | 17 | 78915865 | 78931773 | NM_02923 | chr17 | 78922176 | 78922757 |
|   | 15 | 78721041 | 78731213 | NM_00916 | chr15 | 78726466 | 78727084 |
|   | 17 | 78653357 | 78661856 | BC019508 | chr17 | 78656343 | 78657067 |
|   | 15 | 78397455 | 78406038 | NM_00900 | chr15 | 78403071 | 78403687 |
|   | 14 | 78393725 | 78402325 | NM_01070 | chr14 | 78398556 | 78399143 |
|   | 10 | 78380921 | 78389420 | NM_14707 | chr10 | 78386309 | 78387036 |
|   | 10 | 78380921 | 78389420 | NM_14707 | chr10 | 78384631 | 78385213 |
|   | 18 | 78366017 | 78374516 | AF258601 | chr18 | 78371455 | 78372288 |
|   | 6  | 78305855 | 78314374 | NM_01389 | chr6  | 78313129 | 78314159 |



|    |          |          |          |       |          |          |
|----|----------|----------|----------|-------|----------|----------|
| 11 | 78200254 | 78208753 | NM_00823 | chr11 | 78201587 | 78202203 |
| 14 | 78154666 | 78163165 | NM_00102 | chr14 | 78161029 | 78161904 |
| 15 | 78147113 | 78155774 | NM_00778 | chr15 | 78153871 | 78154476 |
| 1  | 78077455 | 78086283 | NM_00878 | chr1  | 78084332 | 78085098 |
| 11 | 77988881 | 77997460 | NM_02670 | chr11 | 77988938 | 77989479 |
| 12 | 77738811 | 77747356 | NM_13405 | chr12 | 77743816 | 77744457 |
| 15 | 77550327 | 77558826 | NM_17374 | chr15 | 77557105 | 77557600 |
| 15 | 77550327 | 77558826 | NM_17374 | chr15 | 77551201 | 77552249 |
| 5  | 77436018 | 77444563 | NM_01951 | chr5  | 77441116 | 77441780 |
| 5  | 77403387 | 77411888 | NM_02350 | chr5  | 77404664 | 77405270 |
| 11 | 77345270 | 77353769 | BC019960 | chr11 | 77350392 | 77351541 |
| 12 | 77298605 | 77307104 | BC029005 | chr12 | 77303864 | 77304699 |
| 10 | 77226563 | 77241542 | NM_14585 | chr10 | 77233287 | 77233903 |
| 10 | 77227667 | 77236166 | BC115499 | chr10 | 77233287 | 77233903 |
| 10 | 77144360 | 77172719 | NM_01067 | chr10 | 77171131 | 77172049 |
| 10 | 77144360 | 77172719 | NM_01067 | chr10 | 77163192 | 77164312 |
| 10 | 77144360 | 77172719 | NM_01067 | chr10 | 77153857 | 77154482 |
| 10 | 77144360 | 77172719 | NM_01067 | chr10 | 77151862 | 77152314 |
| 12 | 77093600 | 77102099 | NM_20770 | chr12 | 77100677 | 77101817 |
| 9  | 76829133 | 76837658 | NM_01203 | chr9  | 76834813 | 76835560 |
| 14 | 76820630 | 76829162 | NM_17762 | chr14 | 76821534 | 76822141 |
| 10 | 76800954 | 76809453 | AF291049 | chr10 | 76808469 | 76809054 |
| 10 | 76800954 | 76809453 | AF291049 | chr10 | 76803948 | 76804647 |
| 10 | 76697016 | 76711170 | NM_03026 | chr10 | 76710725 | 76711150 |
| 13 | 76520479 | 76528998 | NM_17549 | chr13 | 76528276 | 76528810 |
| 15 | 76360138 | 76368697 | NM_02964 | chr15 | 76363017 | 76363685 |
| 15 | 76363491 | 76371990 | NM_01390 | chr15 | 76363017 | 76363685 |
| 15 | 76346658 | 76360276 | NM_13089 | chr15 | 76359138 | 76359724 |
| 16 | 76283872 | 76292391 | AF147745 | chr16 | 76289784 | 76290900 |
| 11 | 76282145 | 76290649 | BC059064 | chr11 | 76288834 | 76289529 |
| 10 | 76264014 | 76272513 | BC042440 | chr10 | 76270306 | 76270979 |
| 10 | 76264014 | 76272513 | BC042440 | chr10 | 76264367 | 76265072 |
| 13 | 76221940 | 76230439 | BC006925 | chr13 | 76229022 | 76229879 |
| 12 | 76221153 | 76229793 | NM_02327 | chr12 | 76223650 | 76224386 |
| 2  | 76158788 | 76167288 | NM_00998 | chr2  | 76160448 | 76161233 |
| 10 | 76064531 | 76073043 | NM_14600 | chr10 | 76071160 | 76071755 |
| 15 | 76020466 | 76042420 | NM_20138 | chr15 | 76020705 | 76021694 |
| 15 | 75905626 | 75914167 | NM_02836 | chr15 | 75907341 | 75908069 |
| 16 | 75789405 | 75797946 | NM_02338 | chr16 | 75796392 | 75797143 |
| 15 | 75719237 | 75727736 | NM_17260 | chr15 | 75724590 | 75725211 |
| 10 | 75691569 | 75700068 | NM_00911 | chr10 | 75692125 | 75693450 |
| 3  | 75637474 | 75645999 | NM_00925 | chr3  | 75640260 | 75640979 |
| 3  | 75640183 | 75648726 | NM_01974 | chr3  | 75640260 | 75640979 |
| 4  | 75602208 | 75611113 | NM_00101 | chr4  | 75603747 | 75604340 |
| 15 | 75503546 | 75512045 | NM_02840 | chr15 | 75504716 | 75505387 |
| 8  | 75453967 | 75462466 | NM_02321 | chr8  | 75460511 | 75461111 |
| 15 | 75417897 | 75426412 | NM_02673 | chr15 | 75420800 | 75421545 |

|    |          |          |          |       |          |          |
|----|----------|----------|----------|-------|----------|----------|
| 11 | 75413741 | 75422243 | BC086792 | chr11 | 75414465 | 75414990 |
| 1  | 75269018 | 75277517 | BC048698 | chr1  | 75270054 | 75270657 |
| 15 | 75256585 | 75265084 | NM_00103 | chr15 | 75259519 | 75260124 |
| 1  | 75237492 | 75245991 | NM_01004 | chr1  | 75240492 | 75241319 |
| 18 | 75176084 | 75184583 | BC018220 | chr18 | 75181364 | 75182111 |
| 1  | 75158992 | 75167528 | NM_00904 | chr1  | 75165461 | 75166228 |
| 8  | 75139309 | 75147963 | BC120812 | chr8  | 75140037 | 75140641 |
| 9  | 75127676 | 75136194 | NM_01347 | chr9  | 75130402 | 75131075 |
| 8  | 75112657 | 75124931 | NM_19794 | chr8  | 75119035 | 75119445 |
| 9  | 75091286 | 75102650 | NM_13871 | chr9  | 75095175 | 75095792 |
| 10 | 75027097 | 75035872 | NM_01182 | chr10 | 75033405 | 75034097 |
| 10 | 75027097 | 75035872 | NM_01182 | chr10 | 75031991 | 75032895 |
| 10 | 75001547 | 75010046 | NM_19886 | chr10 | 75006084 | 75006751 |
| 15 | 74873586 | 74882085 | NM_01074 | chr15 | 74876342 | 74877127 |
| 1  | 74866307 | 74874806 | NM_00103 | chr1  | 74867549 | 74868166 |
| 10 | 74844749 | 74853248 | NM_13399 | chr10 | 74851208 | 74852021 |
| 1  | 74816127 | 74839928 | NM_15311 | chr1  | 74839916 | 74840507 |
| 11 | 74799552 | 74808051 | BC006644 | chr11 | 74802795 | 74803377 |
| 1  | 74782305 | 74790804 | NM_00987 | chr1  | 74785905 | 74786634 |
| 11 | 74733193 | 74747898 | NM_01376 | chr11 | 74745605 | 74746437 |
| 9  | 74733488 | 74742156 | BC060215 | chr9  | 74734423 | 74735136 |
| 14 | 74683158 | 74699142 | NM_02621 | chr14 | 74688420 | 74689102 |
| 14 | 74683158 | 74699142 | NM_02621 | chr14 | 74684343 | 74684993 |
| 15 | 74624289 | 74633223 | NM_02962 | chr15 | 74625363 | 74625968 |
| 15 | 74588323 | 74596822 | NM_01074 | chr15 | 74588381 | 74589235 |
| 18 | 74561984 | 74570490 | NM_20160 | chr18 | 74569589 | 74570180 |
| 18 | 74561984 | 74570490 | NM_20160 | chr18 | 74566293 | 74566880 |
| 15 | 74530416 | 74550988 | NM_19860 | chr15 | 74541564 | 74542564 |
| 15 | 74532218 | 74542552 | NM_00841 | chr15 | 74541564 | 74542564 |
| 15 | 74530416 | 74550988 | NM_19860 | chr15 | 74539221 | 74540792 |
| 15 | 74532218 | 74542552 | NM_00841 | chr15 | 74539221 | 74540792 |
| 1  | 74528662 | 74537345 | NM_17503 | chr1  | 74534968 | 74535480 |
| 1  | 74532085 | 74540604 | NM_02131 | chr1  | 74534968 | 74535480 |
| 1  | 74474994 | 74483493 | NM_17697 | chr1  | 74480320 | 74480972 |
| 1  | 74474994 | 74483493 | NM_17697 | chr1  | 74477903 | 74478485 |
| 13 | 74423864 | 74432363 | NM_02770 | chr13 | 74428259 | 74429130 |
| 2  | 74390244 | 74398746 | BC038626 | chr2  | 74392276 | 74392718 |
| 14 | 74322644 | 74332140 | NM_02645 | chr14 | 74323507 | 74324342 |
| 1  | 74302410 | 74310995 | NM_01361 | chr1  | 74304101 | 74304697 |
| 1  | 74259817 | 74268316 | NM_01999 | chr1  | 74261447 | 74261939 |
| 18 | 74187819 | 74196318 | NM_17263 | chr18 | 74187949 | 74188701 |
| 11 | 74174866 | 74183365 | NM_00101 | chr11 | 74180746 | 74181410 |
| 11 | 74148925 | 74157424 | NM_14670 | chr11 | 74153717 | 74154335 |
| 18 | 74093659 | 74102158 | BC062911 | chr18 | 74099203 | 74099818 |
| 18 | 74093659 | 74102158 | BC062911 | chr18 | 74094848 | 74095836 |
| 13 | 74086992 | 74095512 | NM_00935 | chr13 | 74090613 | 74091633 |
| 14 | 73926223 | 73934722 | D37837   | chr14 | 73929169 | 73929771 |

|    |          |          |          |       |          |          |
|----|----------|----------|----------|-------|----------|----------|
| 15 | 73906310 | 73914809 | BC024418 | chr15 | 73907585 | 73908172 |
| 13 | 73720801 | 73733346 | NM_01888 | chr13 | 73723714 | 73724839 |
| 17 | 73703746 | 73712478 | NM_02057 | chr17 | 73710983 | 73712122 |
| 17 | 73703746 | 73712478 | NM_02057 | chr17 | 73707343 | 73707992 |
| 11 | 73591021 | 73599520 | NM_14700 | chr11 | 73594716 | 73595301 |
| 8  | 73558114 | 73567084 | NM_01181 | chr8  | 73561684 | 73562348 |
| 14 | 73460473 | 73472612 | NM_01690 | chr14 | 73470167 | 73470847 |
| 6  | 73396629 | 73405176 | NM_02573 | chr6  | 73398427 | 73399012 |
| 11 | 73163950 | 73172449 | NM_14692 | chr11 | 73168561 | 73169435 |
| 12 | 73152078 | 73161562 | NM_00100 | chr12 | 73159793 | 73160786 |
| 11 | 73138297 | 73146829 | NM_02311 | chr11 | 73139243 | 73140159 |
| 11 | 73139936 | 73148435 | NM_00104 | chr11 | 73139243 | 73140159 |
| 8  | 73054322 | 73071197 | NM_00102 | chr8  | 73063142 | 73063831 |
| 5  | 73013141 | 73021737 | NM_01369 | chr5  | 73015045 | 73015790 |
| 11 | 72951984 | 72960489 | NM_01035 | chr11 | 72959534 | 72960237 |
| 1  | 72946600 | 72955106 | NM_00940 | chr1  | 72946948 | 72947615 |
| 5  | 72914478 | 72927887 | NM_00772 | chr5  | 72923916 | 72924593 |
| 5  | 72920931 | 72929493 | BC125449 | chr5  | 72923916 | 72924593 |
| 5  | 72914478 | 72927887 | NM_00772 | chr5  | 72918108 | 72918452 |
| 9  | 72855375 | 72863874 | AF304376 | chr9  | 72856810 | 72857417 |
| 5  | 72780844 | 72789608 | NM_01686 | chr5  | 72782022 | 72782809 |
| 5  | 72553182 | 72561681 | BC029551 | chr5  | 72558619 | 72559247 |
| 17 | 72506185 | 72515164 | NM_00743 | chr17 | 72506186 | 72506940 |
| 1  | 72467273 | 72476138 | NM_00104 | chr1  | 72468996 | 72469596 |
| 8  | 72194069 | 72202568 | NM_17249 | chr8  | 72194114 | 72195193 |
| 7  | 72177609 | 72186108 | NM_00102 | chr7  | 72178803 | 72179529 |
| 8  | 72067443 | 72075942 | NM_19936 | chr8  | 72071261 | 72071941 |
| 11 | 71851205 | 71859704 | NM_05324 | chr11 | 71852368 | 71853132 |
| 11 | 71852697 | 71861709 | NM_14452 | chr11 | 71852368 | 71853132 |
| 9  | 71388418 | 71396920 | NM_00103 | chr9  | 71393943 | 71394599 |
| 6  | 71249243 | 71257742 | U76371   | chr6  | 71255467 | 71256281 |
| 6  | 71123467 | 71131977 | NM_01739 | chr6  | 71124650 | 71125454 |
| 2  | 70912891 | 70921450 | AF354666 | chr2  | 70916294 | 70916971 |
| 11 | 70847151 | 70855708 | NM_13402 | chr11 | 70854712 | 70855660 |
| 12 | 70846998 | 70855497 | BC057068 | chr12 | 70854302 | 70855076 |
| 17 | 70774678 | 70783177 | BC091748 | chr17 | 70775077 | 70775809 |
| 6  | 70719078 | 70727754 | NM_00907 | chr6  | 70723487 | 70724022 |
| 6  | 70646143 | 70658513 | BC092064 | chr6  | 70647871 | 70648561 |
| 2  | 70623820 | 70632319 | NM_17266 | chr2  | 70631108 | 70631606 |
| 9  | 70472203 | 70480842 | NM_00739 | chr9  | 70474246 | 70474834 |
| 17 | 70323696 | 70332195 | NM_17763 | chr17 | 70327615 | 70328227 |
| 17 | 70323696 | 70332195 | NM_17763 | chr17 | 70324922 | 70325525 |
| X  | 70138822 | 70147333 | NM_01940 | chrX  | 70146632 | 70147275 |
| 6  | 70139262 | 70147761 | BC094049 | chr6  | 70144793 | 70145767 |
| 11 | 69940552 | 69952810 | NM_14513 | chr11 | 69952049 | 69952743 |
| 2  | 69656419 | 69665020 | NM_00927 | chr2  | 69658721 | 69659386 |
| 11 | 69632136 | 69657044 | NM_19886 | chr11 | 69651736 | 69652453 |

|   |    |          |          |          |       |          |          |
|---|----|----------|----------|----------|-------|----------|----------|
|   | 11 | 69648720 | 69665589 | NM_02356 | chr11 | 69651736 | 69652453 |
|   | 11 | 69632136 | 69657044 | NM_19886 | chr11 | 69641687 | 69642802 |
|   | 11 | 69632136 | 69657044 | NM_19886 | chr11 | 69633510 | 69634471 |
| X |    | 69438936 | 69447441 | BC064787 | chrX  | 69446005 | 69447156 |
| X |    | 69345296 | 69355761 | NM_01172 | chrX  | 69347401 | 69348323 |
|   | 17 | 69282880 | 69292843 | NM_00954 | chr17 | 69284577 | 69285281 |
|   | 14 | 69252769 | 69265156 | NM_00975 | chr14 | 69262592 | 69263376 |
|   | 14 | 69259919 | 69268541 | NM_14521 | chr14 | 69262592 | 69263376 |
|   | 11 | 69134175 | 69145026 | NM_01059 | chr11 | 69134965 | 69135602 |
|   | 17 | 69106784 | 69115283 | AF177146 | chr17 | 69108281 | 69109029 |
|   | 2  | 68930662 | 68939185 | NM_18154 | chr2  | 68936930 | 68937566 |
|   | 10 | 68923065 | 68932064 | NM_14600 | chr10 | 68928521 | 68929151 |
|   | 11 | 68768758 | 68779053 | NM_17756 | chr11 | 68772363 | 68773183 |
|   | 3  | 68654363 | 68662935 | NM_01392 | chr3  | 68654436 | 68655395 |
|   | 8  | 68541514 | 68550013 | NM_17518 | chr8  | 68545723 | 68546308 |
|   | 11 | 68502110 | 68510833 | NM_17526 | chr11 | 68509032 | 68509636 |
|   | 14 | 68496562 | 68505111 | NM_02027 | chr14 | 68496453 | 68497233 |
|   | 7  | 68485969 | 68494468 | NM_00101 | chr7  | 68493419 | 68494006 |
|   | 7  | 68485969 | 68494468 | NM_00101 | chr7  | 68489582 | 68490709 |
|   | 14 | 68453817 | 68462316 | BC006648 | chr14 | 68457887 | 68458676 |
|   | 11 | 68366381 | 68374880 | NM_14600 | chr11 | 68366920 | 68367504 |
|   | 13 | 68356440 | 68364939 | BC048507 | chr13 | 68361619 | 68362465 |
|   | 14 | 68245130 | 68253629 | NM_17342 | chr14 | 68247523 | 68248125 |
|   | 14 | 68245130 | 68253629 | NM_17342 | chr14 | 68246267 | 68246861 |
|   | 14 | 68138022 | 68146521 | NM_01092 | chr14 | 68138403 | 68139016 |
| X |    | 68063522 | 68072051 | BC094639 | chrX  | 68064455 | 68065316 |
|   | 10 | 67934733 | 67943232 | NM_02849 | chr10 | 67937145 | 67937688 |
|   | 13 | 67918016 | 67926515 | NM_17781 | chr13 | 67924332 | 67924874 |
| X |    | 67810510 | 67821105 | NM_00825 | chrX  | 67816340 | 67817279 |
|   | 10 | 67671573 | 67680097 | NM_02359 | chr10 | 67676189 | 67676860 |
|   | 13 | 67660903 | 67674803 | NM_00101 | chr13 | 67673516 | 67674232 |
|   | 13 | 67660903 | 67674803 | NM_00101 | chr13 | 67667582 | 67668756 |
|   | 7  | 67602721 | 67611220 | BC047212 | chr7  | 67609866 | 67610745 |
|   | 14 | 67532894 | 67541402 | NM_02147 | chr14 | 67535291 | 67535792 |
|   | 10 | 67529484 | 67537983 | AF401550 | chr10 | 67535209 | 67535795 |
|   | 18 | 67510088 | 67518599 | NM_02647 | chr18 | 67512926 | 67513554 |
|   | 10 | 67430758 | 67439257 | AY036116 | chr10 | 67438411 | 67438885 |
|   | 10 | 67430758 | 67439257 | AY036116 | chr10 | 67435615 | 67436222 |
|   | 9  | 67172480 | 67180979 | BC079896 | chr9  | 67175705 | 67176334 |
|   | 11 | 67068845 | 67077344 | BC052786 | chr11 | 67073224 | 67074223 |
|   | 5  | 66949376 | 66957904 | NM_01167 | chr5  | 66950761 | 66951477 |
|   | 6  | 66820009 | 66828537 | NM_02527 | chr6  | 66828192 | 66828837 |
|   | 14 | 66715790 | 66724289 | BC016533 | chr14 | 66723022 | 66723792 |
|   | 14 | 66715790 | 66724289 | BC016533 | chr14 | 66721046 | 66721559 |
|   | 14 | 66658256 | 66675171 | NM_17538 | chr14 | 66660992 | 66661840 |
|   | 9  | 66592068 | 66600599 | NM_17758 | chr9  | 66592402 | 66592902 |
|   | 7  | 66581054 | 66589553 | NM_15281 | chr7  | 66586278 | 66586968 |

|    |          |          |          |       |          |          |
|----|----------|----------|----------|-------|----------|----------|
| 5  | 66579030 | 66587529 | AY650904 | chr5  | 66584143 | 66584750 |
| 5  | 66579030 | 66587529 | AY650904 | chr5  | 66579075 | 66579709 |
| 9  | 66506886 | 66515385 | NM_17839 | chr9  | 66514605 | 66515105 |
| 3  | 66382249 | 66390766 | NM_14582 | chr3  | 66389907 | 66390522 |
| 3  | 66382249 | 66390766 | NM_14582 | chr3  | 66385597 | 66386395 |
| 7  | 66264741 | 66273291 | NM_14619 | chr7  | 66266000 | 66266635 |
| 18 | 66092971 | 66101568 | NM_14549 | chr18 | 66094306 | 66094906 |
| 18 | 65992863 | 66001362 | NM_17501 | chr18 | 65997116 | 65997722 |
| 2  | 65922983 | 65931632 | NM_01573 | chr2  | 65929222 | 65930031 |
| 6  | 65876187 | 65884740 | NM_02629 | chr6  | 65882798 | 65883408 |
| 15 | 65736227 | 65748070 | NM_01095 | chr15 | 65738224 | 65739210 |
| 11 | 65617370 | 65626657 | NM_02610 | chr11 | 65617764 | 65618357 |
| 17 | 65536800 | 65547711 | NM_15351 | chr17 | 65538407 | 65539002 |
| 6  | 65513976 | 65522672 | NM_00100 | chr6  | 65518573 | 65519628 |
| 2  | 65296939 | 65305438 | L42337   | chr2  | 65297857 | 65298568 |
| 5  | 65232218 | 65245170 | NM_01160 | chr5  | 65234931 | 65235622 |
| 5  | 65203888 | 65217834 | NM_03068 | chr5  | 65204985 | 65205773 |
| 9  | 65146638 | 65155137 | BC022772 | chr9  | 65146632 | 65147270 |
| 1  | 64995198 | 65003697 | NM_00777 | chr1  | 65001988 | 65002690 |
| 9  | 64933160 | 64941717 | NM_00898 | chr9  | 64934833 | 64935417 |
| 1  | 64926396 | 64934895 | NM_01128 | chr1  | 64928650 | 64929243 |
| 14 | 64916735 | 64931450 | NM_01349 | chr14 | 64918983 | 64919591 |
| 14 | 64905355 | 64913854 | NM_17260 | chr14 | 64905837 | 64906502 |
| 14 | 64889922 | 64898421 | BC051636 | chr14 | 64892587 | 64893073 |
| 14 | 64889922 | 64898421 | BC051636 | chr14 | 64891646 | 64892368 |
| 11 | 64789286 | 64797791 | NM_02347 | chr11 | 64790855 | 64791463 |
| 7  | 64650089 | 64658602 | NM_18308 | chr7  | 64651944 | 64652591 |
| 7  | 64650089 | 64658602 | NM_18308 | chr7  | 64650958 | 64651566 |
| 1  | 64548215 | 64557444 | NM_02596 | chr1  | 64556481 | 64557088 |
| 7  | 64170518 | 64180985 | BC055074 | chr7  | 64172134 | 64172727 |
| 13 | 64165088 | 64173641 | NM_01998 | chr13 | 64170105 | 64170722 |
| 13 | 64095909 | 64104408 | NM_00829 | chr13 | 64098347 | 64098804 |
| 13 | 64095909 | 64104408 | NM_00829 | chr13 | 64096354 | 64097294 |
| 7  | 64058533 | 64067039 | AF047714 | chr7  | 64065162 | 64065821 |
| 9  | 63909153 | 63922111 | NM_14583 | chr9  | 63910629 | 63911279 |
| 2  | 63896328 | 63904877 | NM_02171 | chr2  | 63903727 | 63904714 |
| 16 | 63803838 | 63812360 | NM_01014 | chr16 | 63803828 | 63804452 |
| 10 | 63482600 | 63491612 | NM_17867 | chr10 | 63484164 | 63484989 |
| 14 | 63406505 | 63416013 | NM_02632 | chr14 | 63414194 | 63414695 |
| 3  | 63377801 | 63386651 | NM_00860 | chr3  | 63380329 | 63381289 |
| 4  | 63228949 | 63237474 | NM_17737 | chr4  | 63229719 | 63230757 |
| 18 | 63072459 | 63080958 | AB023957 | chr18 | 63074940 | 63075553 |
| 14 | 62978720 | 62987219 | BC031365 | chr14 | 62981890 | 62982486 |
| 14 | 62970000 | 62978520 | AY168340 | chr14 | 62975815 | 62976761 |
| 14 | 62939391 | 62947900 | NM_02635 | chr14 | 62940859 | 62942308 |
| 9  | 62776386 | 62784885 | NM_01966 | chr9  | 62781547 | 62782152 |
| 16 | 62653231 | 62661740 | BC103782 | chr16 | 62656332 | 62656995 |

|    |          |          |          |       |          |          |
|----|----------|----------|----------|-------|----------|----------|
| 11 | 62542514 | 62551288 | NM_13320 | chr11 | 62542804 | 62543580 |
| 2  | 62410116 | 62418615 | BC025508 | chr2  | 62412227 | 62413002 |
| 14 | 62400527 | 62409026 | BC060626 | chr14 | 62405115 | 62406715 |
| 11 | 62384681 | 62394661 | NM_01170 | chr11 | 62385011 | 62385629 |
| 14 | 62384565 | 62393064 | NM_17762 | chr14 | 62383232 | 62384797 |
| 2  | 61841402 | 61849932 | NM_03355 | chr2  | 61848382 | 61848999 |
| 18 | 61830495 | 61839004 | NM_17283 | chr18 | 61831724 | 61832641 |
| 10 | 61772741 | 61781240 | NM_01043 | chr10 | 61773757 | 61774413 |
| 10 | 61624025 | 61632583 | NM_19799 | chr10 | 61629168 | 61629871 |
| 10 | 61503826 | 61512370 | NM_02725 | chr10 | 61506562 | 61507208 |
| 2  | 61387966 | 61396497 | BC026148 | chr2  | 61388341 | 61389374 |
| 2  | 61373422 | 61381923 | NM_01152 | chr2  | 61380751 | 61381554 |
| 4  | 61319042 | 61327541 | NM_00864 | chr4  | 61323671 | 61324116 |
| 11 | 61191755 | 61200259 | NM_02618 | chr11 | 61192907 | 61193786 |
| 18 | 61031609 | 61040108 | NM_00103 | chr18 | 61033843 | 61034829 |
| 13 | 61011688 | 61021548 | NM_01200 | chr13 | 61012398 | 61013254 |
| 11 | 60875999 | 60885606 | NM_01060 | chr11 | 60880291 | 60881149 |
| 4  | 60634199 | 60642721 | BC099597 | chr4  | 60635647 | 60636247 |
| 11 | 60624787 | 60641473 | NM_00917 | chr11 | 60634064 | 60634749 |
| 10 | 60561343 | 60573118 | NM_00101 | chr10 | 60563963 | 60564677 |
| 2  | 60351601 | 60360117 | NM_00886 | chr2  | 60358168 | 60358778 |
| 2  | 60351601 | 60360117 | NM_00886 | chr2  | 60355953 | 60356974 |
| 2  | 60181598 | 60190103 | NM_01382 | chr2  | 60184354 | 60185019 |
| 11 | 60166567 | 60175100 | NM_00103 | chr11 | 60173133 | 60173824 |
| 14 | 60086567 | 60095066 | NM_17280 | chr14 | 60091415 | 60092156 |
| 14 | 60086567 | 60095066 | NM_17280 | chr14 | 60087114 | 60087769 |
| 14 | 59976449 | 59984948 | AF247000 | chr14 | 59980323 | 59981056 |
| 12 | 59925403 | 59933965 | NM_02565 | chr12 | 59926893 | 59927565 |
| 12 | 59927404 | 59936029 | NM_00914 | chr12 | 59926893 | 59927565 |
| 7  | 59881546 | 59890063 | NM_01367 | chr7  | 59883794 | 59884920 |
| 10 | 59736261 | 59744791 | NM_02873 | chr10 | 59738168 | 59739242 |
| 10 | 59581565 | 59595596 | NM_01680 | chr10 | 59589362 | 59589980 |
| 16 | 59495509 | 59504008 | NM_17484 | chr16 | 59498376 | 59499575 |
| 1  | 59420725 | 59429641 | NM_00805 | chr1  | 59428016 | 59428996 |
| 9  | 59370343 | 59378842 | NM_17523 | chr9  | 59372735 | 59373175 |
| 6  | 59353369 | 59361872 | NM_18318 | chr6  | 59354173 | 59354845 |
| 11 | 59319608 | 59328416 | NM_17294 | chr11 | 59320768 | 59321398 |
| 3  | 59265544 | 59274043 | NM_03239 | chr3  | 59265741 | 59266341 |
| 3  | 59216001 | 59225257 | NM_13320 | chr3  | 59217786 | 59218589 |
| 3  | 59187202 | 59195720 | NM_17339 | chr3  | 59191498 | 59192092 |
| 1  | 59100715 | 59112113 | NM_14514 | chr1  | 59103325 | 59104049 |
| 4  | 59078615 | 59087132 | NM_02596 | chr4  | 59084852 | 59085486 |
| 4  | 59083116 | 59100052 | NM_00103 | chr4  | 59084852 | 59085486 |
| 1  | 59036913 | 59045446 | NM_17520 | chr1  | 59039190 | 59040320 |
| 19 | 59000427 | 59008926 | BC023285 | chr19 | 59002345 | 59002946 |
| 3  | 58970642 | 58979141 | NM_15338 | chr3  | 58974668 | 58975304 |
| 1  | 58912117 | 58920849 | NM_17265 | chr1  | 58918529 | 58919132 |

|    |          |          |          |       |          |          |
|----|----------|----------|----------|-------|----------|----------|
| 11 | 58759106 | 58773412 | NM_17821 | chr11 | 58762789 | 58763573 |
| 18 | 58675609 | 58684125 | BC115435 | chr18 | 58683492 | 58684028 |
| 11 | 58651311 | 58665852 | NM_14653 | chr11 | 58654725 | 58655449 |
| 11 | 58641351 | 58649850 | NM_00101 | chr11 | 58646176 | 58646968 |
| 11 | 58627123 | 58635622 | NM_14653 | chr11 | 58630555 | 58631590 |
| 11 | 58588284 | 58604930 | NM_00101 | chr11 | 58601731 | 58602749 |
| 4  | 58590923 | 58599422 | U48235   | chr4  | 58598677 | 58599349 |
| 4  | 58590923 | 58599422 | U48235   | chr4  | 58595788 | 58596506 |
| 17 | 58566969 | 58575468 | BC024774 | chr17 | 58575428 | 58576212 |
| 11 | 58567862 | 58576361 | NM_00101 | chr11 | 58568041 | 58568643 |
| 11 | 58546859 | 58555358 | NM_00101 | chr11 | 58549176 | 58549812 |
| 11 | 58427166 | 58435665 | NM_14454 | chr11 | 58432352 | 58433406 |
| 1  | 58387302 | 58396032 | NM_02737 | chr1  | 58395556 | 58395926 |
| 11 | 58357152 | 58365669 | NM_00101 | chr11 | 58359210 | 58360069 |
| 9  | 58336399 | 58345078 | NM_13398 | chr9  | 58339058 | 58339946 |
| 11 | 58316250 | 58331459 | NM_00101 | chr11 | 58318369 | 58319336 |
| 11 | 58266619 | 58278175 | NM_14687 | chr11 | 58275066 | 58275820 |
| 11 | 58231304 | 58239833 | NM_02723 | chr11 | 58232992 | 58233605 |
| 1  | 58216872 | 58225371 | NM_00100 | chr1  | 58221086 | 58222187 |
| 1  | 58051682 | 58060181 | NM_02361 | chr1  | 58057397 | 58058185 |
| 9  | 57997353 | 58006275 | NM_17719 | chr9  | 58004426 | 58005156 |
| 9  | 57997353 | 58006275 | NM_17719 | chr9  | 57997784 | 57998415 |
| 1  | 57968515 | 57977049 | NM_00967 | chr1  | 57975037 | 57975736 |
| 1  | 57968515 | 57977049 | NM_00967 | chr1  | 57973725 | 57974384 |
| 4  | 57942213 | 57951113 | NM_00103 | chr4  | 57945348 | 57945962 |
| 9  | 57921225 | 57929985 | NM_00929 | chr9  | 57928658 | 57929465 |
| 6  | 57906381 | 57914880 | NM_05323 | chr6  | 57910266 | 57911168 |
| 2  | 57807270 | 57816040 | NM_17285 | chr2  | 57813707 | 57814468 |
| 1  | 57784117 | 57792616 | BC014764 | chr1  | 57785413 | 57786474 |
| 9  | 57732272 | 57740771 | NM_01135 | chr9  | 57737874 | 57738624 |
| 10 | 57616384 | 57638017 | NM_00103 | chr10 | 57629470 | 57630579 |
| 10 | 57616384 | 57638017 | NM_00103 | chr10 | 57621692 | 57622877 |
| 19 | 57500178 | 57508683 | NM_02811 | chr19 | 57502814 | 57503229 |
| 3  | 57380303 | 57395848 | NM_00853 | chr3  | 57387408 | 57388388 |
| 9  | 57233105 | 57244251 | NM_17683 | chr9  | 57234548 | 57235133 |
| X  | 57151371 | 57159870 | NM_00923 | chrX  | 57154637 | 57155227 |
| 16 | 56993804 | 57002303 | NM_18328 | chr16 | 56994545 | 56995252 |
| 17 | 56958450 | 56966961 | NM_01169 | chr17 | 56966307 | 56966663 |
| 2  | 56936807 | 56945527 | AB014889 | chr2  | 56937317 | 56937956 |
| 11 | 56849379 | 56857878 | NM_00816 | chr11 | 56856923 | 56857860 |
| 17 | 56742507 | 56751010 | NM_02587 | chr17 | 56747298 | 56748061 |
| 9  | 56722683 | 56732508 | NM_17548 | chr9  | 56724171 | 56725019 |
| 13 | 56605325 | 56621730 | NM_00936 | chr13 | 56615869 | 56616457 |
| 1  | 56579489 | 56587996 | NM_02766 | chr1  | 56585651 | 56586496 |
| 15 | 56522082 | 56530602 | NM_00821 | chr15 | 56528892 | 56529786 |
| 14 | 56473017 | 56481816 | NM_14583 | chr14 | 56475085 | 56475720 |
| 17 | 56443902 | 56452407 | NM_14485 | chr17 | 56444051 | 56444896 |

|    |          |          |          |       |          |          |
|----|----------|----------|----------|-------|----------|----------|
| 12 | 56311018 | 56319527 | NM_01196 | chr12 | 56314105 | 56314737 |
| 17 | 56292334 | 56300890 | NM_15315 | chr17 | 56298478 | 56299329 |
| 6  | 56289101 | 56298097 | NM_00102 | chr6  | 56297899 | 56298584 |
| 13 | 56184113 | 56194423 | NM_14597 | chr13 | 56185778 | 56187022 |
| 17 | 56107578 | 56116147 | NM_01121 | chr17 | 56111186 | 56111676 |
| 16 | 55857300 | 55871662 | NM_02881 | chr16 | 55867850 | 55869012 |
| 6  | 55608135 | 55616647 | NM_00971 | chr6  | 55615366 | 55615980 |
| 6  | 55608135 | 55616647 | NM_00971 | chr6  | 55613524 | 55614458 |
| 3  | 55543828 | 55552435 | AF155821 | chr3  | 55549683 | 55550374 |
| 13 | 55535657 | 55552143 | NM_13405 | chr13 | 55539928 | 55540525 |
| 11 | 55260780 | 55269289 | NM_00924 | chr11 | 55268642 | 55269091 |
| 6  | 55260010 | 55268523 | NM_00747 | chr6  | 55263436 | 55264169 |
| 6  | 55260010 | 55268523 | NM_00747 | chr6  | 55261497 | 55262299 |
| 19 | 55177967 | 55192788 | M77003   | chr19 | 55178865 | 55179470 |
| 13 | 55156262 | 55167563 | NM_00801 | chr13 | 55163549 | 55164179 |
| 6  | 55126961 | 55135466 | NM_17788 | chr6  | 55128833 | 55129554 |
| 9  | 55119050 | 55127585 | NM_17292 | chr9  | 55120996 | 55121646 |
| 14 | 55111137 | 55119650 | NM_01037 | chr14 | 55113074 | 55113831 |
| 14 | 55072197 | 55080696 | NM_01037 | chr14 | 55073628 | 55074618 |
| 14 | 55054061 | 55062645 | NM_00780 | chr14 | 55059547 | 55060155 |
| 11 | 55051218 | 55059717 | AF453743 | chr11 | 55056710 | 55057304 |
| 11 | 55025951 | 55034500 | NM_15317 | chr11 | 55033711 | 55034314 |
| 14 | 54990194 | 54998711 | NM_00857 | chr14 | 54997320 | 54997908 |
| 14 | 54990194 | 54998711 | NM_00857 | chr14 | 54992424 | 54993451 |
| 15 | 54936407 | 54945065 | NM_14547 | chr15 | 54943638 | 54944332 |
| 14 | 54896132 | 54904809 | NM_01078 | chr14 | 54898460 | 54899052 |
| 14 | 54899051 | 54907550 | M68899   | chr14 | 54898460 | 54899052 |
| 14 | 54896132 | 54904809 | NM_01078 | chr14 | 54896444 | 54897050 |
| 3  | 54864138 | 54872747 | AY145520 | chr3  | 54867371 | 54868047 |
| 9  | 54822068 | 54830696 | NM_14512 | chr9  | 54827583 | 54828464 |
| 15 | 54747583 | 54756192 | NM_01574 | chr15 | 54749930 | 54750557 |
| 14 | 54709499 | 54722601 | NM_00851 | chr14 | 54716594 | 54717219 |
| 14 | 54709949 | 54718529 | NM_00989 | chr14 | 54716594 | 54717219 |
| 9  | 54527076 | 54538665 | NM_00102 | chr9  | 54536535 | 54537325 |
| 9  | 54500539 | 54509038 | BC022948 | chr9  | 54504585 | 54505494 |
| 9  | 54457319 | 54466022 | NM_05317 | chr9  | 54463669 | 54464274 |
| 6  | 54250461 | 54259089 | NM_03002 | chr6  | 54253770 | 54254487 |
| 11 | 54238412 | 54246911 | NM_02569 | chr11 | 54240871 | 54241471 |
| 11 | 53909870 | 53918391 | NM_01941 | chr11 | 53916509 | 53917147 |
| 4  | 53729098 | 53743604 | NM_13930 | chr4  | 53730561 | 53731543 |
| 6  | 53528040 | 53536539 | BC029022 | chr6  | 53528727 | 53529379 |
| 11 | 53459568 | 53468088 | NM_02128 | chr11 | 53459606 | 53460233 |
| X  | 53428890 | 53437389 | NM_13325 | chrX  | 53431050 | 53431658 |
| 14 | 53412352 | 53432934 | NM_02299 | chr14 | 53430586 | 53431170 |
| 13 | 53291144 | 53299643 | NM_01384 | chr13 | 53298809 | 53299194 |
| 9  | 53161681 | 53170192 | NM_02924 | chr9  | 53168662 | 53169615 |
| 9  | 53140418 | 53148917 | NM_21244 | chr9  | 53146402 | 53146999 |



|    |          |          |          |       |          |          |
|----|----------|----------|----------|-------|----------|----------|
| 9  | 53140418 | 53148917 | NM_21244 | chr9  | 53142768 | 53143372 |
| 3  | 53102626 | 53111145 | NM_02622 | chr3  | 53108485 | 53109376 |
| 9  | 53058065 | 53066577 | NM_17684 | chr9  | 53064523 | 53065155 |
| 14 | 52913011 | 52921510 | NM_17729 | chr14 | 52916779 | 52917635 |
| 4  | 52875173 | 52883672 | NM_14682 | chr4  | 52876740 | 52877851 |
| 4  | 52836588 | 52848998 | NM_14685 | chr4  | 52844344 | 52844925 |
| 4  | 52836588 | 52848998 | NM_14685 | chr4  | 52837917 | 52838875 |
| 18 | 52765585 | 52774088 | NM_03009 | chr18 | 52765575 | 52766212 |
| 1  | 52651206 | 52659705 | NM_13382 | chr1  | 52654737 | 52655364 |
| 19 | 52311634 | 52320274 | NM_00838 | chr19 | 52316990 | 52317592 |
| 6  | 52274057 | 52282882 | NM_00104 | chr6  | 52281813 | 52282537 |
| 6  | 52085370 | 52100414 | NM_01044 | chr6  | 52099962 | 52100368 |
| 6  | 52089257 | 52100592 | BC094279 | chr6  | 52099962 | 52100368 |
| 11 | 52069432 | 52077993 | NM_01154 | chr11 | 52074826 | 52075789 |
| 11 | 51986855 | 51995354 | NM_20722 | chr11 | 51992940 | 51993554 |
| 3  | 51941713 | 51950543 | NM_00100 | chr3  | 51946343 | 51947003 |
| 10 | 51916034 | 51924563 | NM_02570 | chr10 | 51923077 | 51923692 |
| 5  | 51839565 | 51848109 | NM_00890 | chr5  | 51839954 | 51840676 |
| 7  | 51749937 | 51758436 | BC013456 | chr7  | 51752472 | 51753084 |
| 3  | 51743122 | 51751621 | NM_17499 | chr3  | 51750459 | 51751163 |
| 11 | 51597758 | 51613057 | NM_17525 | chr11 | 51599303 | 51600135 |
| 7  | 51484025 | 51492969 | NM_08085 | chr7  | 51491283 | 51491952 |
| 7  | 51484025 | 51492969 | NM_08085 | chr7  | 51484205 | 51484720 |
| 13 | 51415260 | 51423773 | NM_01010 | chr13 | 51419790 | 51420605 |
| 13 | 51415260 | 51423773 | NM_01010 | chr13 | 51417540 | 51418145 |
| 11 | 50896680 | 50905992 | NM_00932 | chr11 | 50901506 | 50902220 |
| 11 | 50844397 | 50852896 | NM_14690 | chr11 | 50849701 | 50850390 |
| 18 | 50691362 | 50699873 | NM_02610 | chr18 | 50693288 | 50694332 |
| 18 | 50397699 | 50406198 | NM_00100 | chr18 | 50402175 | 50402902 |
| 10 | 50396691 | 50405190 | BC059917 | chr10 | 50398995 | 50399672 |
| 6  | 50309924 | 50318423 | NM_02788 | chr6  | 50311117 | 50311841 |
| 11 | 50272035 | 50280534 | NM_17255 | chr11 | 50276991 | 50277651 |
| 14 | 50115375 | 50123874 | NM_00744 | chr14 | 50118350 | 50119017 |
| 14 | 50115375 | 50123874 | NM_00744 | chr14 | 50115580 | 50116163 |
| 9  | 50094699 | 50103212 | NM_05283 | chr9  | 50101594 | 50102401 |
| 14 | 50007068 | 50020863 | NM_20123 | chr14 | 50019165 | 50019927 |
| 2  | 49944378 | 49952877 | NM_17713 | chr2  | 49949382 | 49950245 |
| X  | 49796549 | 49805160 | NM_02837 | chrX  | 49797984 | 49798736 |
| 6  | 49746315 | 49754814 | NM_02345 | chr6  | 49751620 | 49752319 |
| 4  | 49616316 | 49624903 | NM_02594 | chr4  | 49623627 | 49624278 |
| 4  | 49563519 | 49576589 | NM_14490 | chr4  | 49568783 | 49569569 |
| 4  | 49563519 | 49576589 | NM_14490 | chr4  | 49564344 | 49565061 |
| 13 | 49550424 | 49566082 | NM_02571 | chr13 | 49550542 | 49551147 |
| 11 | 49447150 | 49455649 | NM_00802 | chr11 | 49449616 | 49450507 |
| 4  | 49426752 | 49435251 | NM_14536 | chr4  | 49432666 | 49433802 |
| 11 | 49401346 | 49409845 | NM_20757 | chr11 | 49407772 | 49408433 |
| 11 | 49372610 | 49381109 | NM_00101 | chr11 | 49379738 | 49380526 |

|    |          |          |          |       |          |          |
|----|----------|----------|----------|-------|----------|----------|
| 11 | 49361148 | 49369647 | NM_20757 | chr11 | 49366580 | 49367593 |
| 13 | 49318646 | 49327167 | NM_01575 | chr13 | 49326139 | 49326513 |
| 11 | 49281276 | 49293289 | NM_14646 | chr11 | 49283073 | 49284173 |
| 11 | 49267850 | 49276349 | NM_14706 | chr11 | 49272582 | 49273268 |
| 11 | 49177957 | 49186456 | NM_14706 | chr11 | 49178530 | 49179148 |
| 11 | 49154971 | 49163470 | NM_20682 | chr11 | 49161334 | 49162050 |
| 11 | 49130720 | 49139223 | NM_14647 | chr11 | 49132723 | 49133718 |
| 11 | 49130720 | 49139223 | NM_14647 | chr11 | 49131787 | 49132495 |
| 11 | 49027969 | 49036512 | NM_17279 | chr11 | 49028337 | 49029034 |
| 9  | 48996463 | 49004962 | NM_17770 | chr9  | 49002563 | 49003406 |
| 11 | 48985682 | 48994181 | NM_14687 | chr11 | 48987143 | 48987754 |
| 11 | 48892166 | 48900665 | NM_17343 | chr11 | 48898644 | 48899232 |
| 6  | 48828771 | 48837270 | BC034215 | chr6  | 48836351 | 48837173 |
| 6  | 48765095 | 48778962 | NM_02532 | chr6  | 48771830 | 48772726 |
| 6  | 48767635 | 48776614 | NM_02305 | chr6  | 48771830 | 48772726 |
| 6  | 48765095 | 48778962 | NM_02532 | chr6  | 48769211 | 48770165 |
| 6  | 48767635 | 48776614 | NM_02305 | chr6  | 48769211 | 48770165 |
| 16 | 48730482 | 48739112 | NM_02388 | chr16 | 48738302 | 48738992 |
| 9  | 48714255 | 48722922 | NM_02027 | chr9  | 48715566 | 48716173 |
| 4  | 48678614 | 48687156 | NM_02650 | chr4  | 48684018 | 48684607 |
| 6  | 48642207 | 48650744 | NM_14616 | chr6  | 48649555 | 48650259 |
| 6  | 48635283 | 48643830 | NM_15317 | chr6  | 48637050 | 48637665 |
| 4  | 48555035 | 48564098 | NM_02813 | chr4  | 48559272 | 48559887 |
| 17 | 48391946 | 48400486 | NM_02745 | chr17 | 48394625 | 48395810 |
| 16 | 48344863 | 48353431 | NM_01081 | chr16 | 48352066 | 48352934 |
| 16 | 48344863 | 48353431 | NM_01081 | chr16 | 48344335 | 48345074 |
| 6  | 48319172 | 48327751 | NM_13392 | chr6  | 48326994 | 48327606 |
| 5  | 48267041 | 48275540 | NM_17880 | chr5  | 48267370 | 48267899 |
| 9  | 48244747 | 48253272 | NM_14494 | chr9  | 48251316 | 48252034 |
| 8  | 48232590 | 48241107 | NM_00839 | chr8  | 48233468 | 48234061 |
| 16 | 48223896 | 48232598 | NM_02861 | chr16 | 48230506 | 48231568 |
| 7  | 48034541 | 48043040 | NM_20753 | chr7  | 48037580 | 48038678 |
| X  | 47922597 | 47932229 | NM_00107 | chrX  | 47931136 | 47931712 |
| 17 | 47627910 | 47636462 | NM_17879 | chr17 | 47634009 | 47634592 |
| 19 | 47276222 | 47284721 | AF401228 | chr19 | 47283115 | 47283717 |
| 19 | 47276222 | 47284721 | AF401228 | chr19 | 47280965 | 47281736 |
| 4  | 47223263 | 47231792 | NM_00992 | chr4  | 47226254 | 47226837 |
| 17 | 47184033 | 47192541 | NM_02597 | chr17 | 47190368 | 47191151 |
| 4  | 47107042 | 47115552 | NM_17269 | chr4  | 47113324 | 47114046 |
| 7  | 46998201 | 47007706 | NM_01364 | chr7  | 47003876 | 47004522 |
| 18 | 46969370 | 46977878 | BC113158 | chr18 | 46974488 | 46975427 |
| 8  | 46878489 | 46887001 | NM_15353 | chr8  | 46881988 | 46882367 |
| 19 | 46723685 | 46732285 | NM_00780 | chr19 | 46728236 | 46728642 |
| 7  | 46532891 | 46546579 | NM_00941 | chr7  | 46539410 | 46540278 |
| 7  | 46505333 | 46513832 | NM_01378 | chr7  | 46512733 | 46513774 |
| 18 | 46335233 | 46343856 | NM_17887 | chr18 | 46338549 | 46339315 |
| 11 | 46292358 | 46300895 | NM_13425 | chr11 | 46299768 | 46300383 |

|    |          |          |          |       |          |          |
|----|----------|----------|----------|-------|----------|----------|
| 7  | 46293767 | 46302266 | BC100546 | chr7  | 46297740 | 46298774 |
| 7  | 46238516 | 46247081 | NM_01086 | chr7  | 46241217 | 46241855 |
| 17 | 46165607 | 46174138 | NM_00935 | chr17 | 46167724 | 46168559 |
| 7  | 46103029 | 46111528 | U96411   | chr7  | 46109588 | 46110175 |
| 7  | 46104033 | 46112534 | NM_15367 | chr7  | 46109588 | 46110175 |
| 11 | 46007283 | 46015782 | NM_17252 | chr11 | 46009312 | 46010191 |
| 4  | 46002560 | 46011059 | NM_14614 | chr4  | 46008149 | 46008756 |
| 11 | 45965327 | 45973826 | AB096093 | chr11 | 45965332 | 45966144 |
| 9  | 45949199 | 45957698 | BC082313 | chr9  | 45953697 | 45954320 |
| 9  | 45949199 | 45957698 | BC082313 | chr9  | 45950685 | 45951368 |
| 5  | 45925057 | 45933862 | NM_02141 | chr5  | 45925866 | 45926780 |
| 17 | 45898319 | 45916403 | NM_14485 | chr17 | 45901155 | 45901760 |
| 16 | 45742934 | 45751433 | BC060683 | chr16 | 45749929 | 45750641 |
| 7  | 45679421 | 45688332 | NM_01118 | chr7  | 45687432 | 45688128 |
| 7  | 45580199 | 45599855 | NM_02001 | chr7  | 45592709 | 45593706 |
| 9  | 45543085 | 45551584 | BC027092 | chr9  | 45547295 | 45548319 |
| 9  | 45543085 | 45551584 | BC027092 | chr9  | 45544492 | 45545097 |
| 12 | 45447332 | 45455831 | AY528242 | chr12 | 45449483 | 45450097 |
| 12 | 45320946 | 45329445 | BC055053 | chr12 | 45326090 | 45326895 |
| 16 | 45325718 | 45334385 | NM_01081 | chr16 | 45325165 | 45326174 |
| 19 | 45198026 | 45206525 | NM_02190 | chr19 | 45198849 | 45199733 |
| 7  | 45187000 | 45195499 | BC092249 | chr7  | 45189649 | 45190391 |
| 9  | 45115180 | 45123933 | NM_02200 | chr9  | 45121758 | 45122744 |
| 9  | 45115180 | 45123933 | NM_02200 | chr9  | 45117765 | 45118824 |
| 19 | 44990201 | 44998700 | BC060679 | chr19 | 44996265 | 44997038 |
| 17 | 44964422 | 44972921 | NM_19860 | chr17 | 44970028 | 44970719 |
| 4  | 44939253 | 44949241 | NM_13859 | chr4  | 44945401 | 44945959 |
| 9  | 44862873 | 44871375 | NM_00101 | chr9  | 44869657 | 44870285 |
| 9  | 44726876 | 44735375 | NM_01348 | chr9  | 44729516 | 44730116 |
| 9  | 44728833 | 44737421 | NM_00985 | chr9  | 44729516 | 44730116 |
| 15 | 44575492 | 44588532 | NM_17876 | chr15 | 44580183 | 44581317 |
| 7  | 44452928 | 44461661 | NM_00842 | chr7  | 44453504 | 44453927 |
| 9  | 44442948 | 44451447 | BC025856 | chr9  | 44444220 | 44444921 |
| 16 | 44414042 | 44422541 | BC056138 | chr16 | 44420923 | 44422037 |
| 4  | 44316017 | 44324585 | NM_01079 | chr4  | 44318183 | 44319088 |
| 19 | 44243185 | 44251753 | NM_18142 | chr19 | 44248508 | 44249138 |
| 11 | 44237486 | 44246008 | NM_00835 | chr11 | 44243552 | 44244170 |
| 18 | 44223795 | 44232353 | NM_03006 | chr18 | 44229187 | 44229850 |
| 18 | 44223795 | 44232353 | NM_03006 | chr18 | 44224460 | 44225049 |
| 1  | 44160921 | 44169477 | NM_20728 | chr1  | 44162816 | 44163810 |
| 9  | 44143171 | 44151849 | NM_00806 | chr9  | 44149966 | 44150568 |
| 7  | 44087479 | 44096011 | NM_01063 | chr7  | 44087849 | 44088636 |
| 7  | 44069477 | 44077980 | NM_01091 | chr7  | 44069660 | 44070289 |
| 7  | 44060272 | 44068771 | NM_00869 | chr7  | 44061013 | 44062236 |
| 7  | 44060272 | 44068771 | NM_00869 | chr7  | 44059884 | 44060496 |
| 15 | 44020307 | 44028823 | NM_01369 | chr15 | 44026374 | 44027766 |
| 7  | 43874720 | 43883245 | NM_01064 | chr7  | 43875185 | 43875927 |

|    |          |          |          |       |          |          |
|----|----------|----------|----------|-------|----------|----------|
| 4  | 43855118 | 43863617 | NM_01947 | chr4  | 43858483 | 43858827 |
| 4  | 43840034 | 43848538 | NM_01947 | chr4  | 43842794 | 43843975 |
| 19 | 43716786 | 43725285 | BC023172 | chr19 | 43722784 | 43723438 |
| 7  | 43673336 | 43682008 | NM_01187 | chr7  | 43677622 | 43678735 |
| 7  | 43654003 | 43668118 | NM_00894 | chr7  | 43666507 | 43667127 |
| 17 | 43535924 | 43544461 | NM_03200 | chr17 | 43542511 | 43542902 |
| 11 | 43442456 | 43450955 | NM_00837 | chr11 | 43447426 | 43448227 |
| 7  | 43292008 | 43314544 | NM_17769 | chr7  | 43310654 | 43311267 |
| 7  | 43292008 | 43314544 | NM_17769 | chr7  | 43297251 | 43297864 |
| 7  | 43213325 | 43221824 | NM_14558 | chr7  | 43220104 | 43221136 |
| 6  | 43159185 | 43167684 | NM_14637 | chr6  | 43161374 | 43162120 |
| 16 | 43160672 | 43169171 | BC031114 | chr16 | 43161130 | 43162016 |
| 13 | 43127811 | 43139359 | NM_00100 | chr13 | 43137457 | 43138114 |
| 17 | 43127571 | 43136237 | NM_02871 | chr17 | 43135128 | 43135740 |
| 17 | 43127571 | 43136237 | NM_02871 | chr17 | 43134292 | 43134885 |
| 4  | 42932351 | 42940850 | NM_17269 | chr4  | 42934012 | 42934470 |
| 14 | 42830936 | 42839435 | U72672   | chr14 | 42837673 | 42838814 |
| 14 | 42830936 | 42839435 | U72672   | chr14 | 42834555 | 42835182 |
| 4  | 42775779 | 42784278 | NM_01188 | chr4  | 42776706 | 42777818 |
| 13 | 42714553 | 42723052 | NM_00100 | chr13 | 42716069 | 42716616 |
| 10 | 42543132 | 42551631 | NM_17293 | chr10 | 42550423 | 42551216 |
| 6  | 42524480 | 42532979 | NM_20339 | chr6  | 42530886 | 42531496 |
| 2  | 42472477 | 42481607 | NM_05301 | chr2  | 42473632 | 42475186 |
| 6  | 42399308 | 42407807 | NM_14698 | chr6  | 42399318 | 42399721 |
| 8  | 42391259 | 42399758 | L29006   | chr8  | 42395456 | 42396176 |
| 19 | 42374659 | 42383158 | BC024472 | chr19 | 42375754 | 42376359 |
| 6  | 42323845 | 42337635 | NM_19915 | chr6  | 42336420 | 42337163 |
| 9  | 42220722 | 42229221 | NM_17303 | chr9  | 42226822 | 42227384 |
| 6  | 42210292 | 42218826 | NM_01349 | chr6  | 42216315 | 42217156 |
| 19 | 42206604 | 42215103 | BC089359 | chr19 | 42212678 | 42213438 |
| 17 | 42153269 | 42161768 | BC089564 | chr17 | 42154458 | 42155409 |
| 19 | 42093162 | 42108061 | NM_02615 | chr19 | 42095581 | 42096504 |
| 17 | 42072380 | 42080879 | NM_18175 | chr17 | 42078489 | 42079233 |
| 6  | 42064543 | 42073042 | NM_18127 | chr6  | 42069895 | 42070884 |
| 11 | 42023224 | 42032353 | NM_01025 | chr11 | 42030688 | 42031273 |
| 19 | 42029074 | 42037573 | NM_14550 | chr19 | 42029999 | 42030616 |
| 8  | 42004600 | 42013184 | NM_03356 | chr8  | 42011824 | 42012840 |
| 8  | 42006488 | 42016561 | NM_01113 | chr8  | 42011824 | 42012840 |
| 4  | 41979785 | 41988284 | BC051472 | chr4  | 41985807 | 41986407 |
| 4  | 41979785 | 41988284 | BC051472 | chr4  | 41980755 | 41981729 |
| 4  | 41927285 | 41935824 | NM_01101 | chr4  | 41932977 | 41933658 |
| 4  | 41881585 | 41891712 | NM_01667 | chr4  | 41890918 | 41891504 |
| 4  | 41881585 | 41891712 | NM_01667 | chr4  | 41882605 | 41883595 |
| 10 | 41741330 | 41749829 | NM_01156 | chr10 | 41747161 | 41747878 |
| 19 | 41596950 | 41605449 | NM_17215 | chr19 | 41598447 | 41599118 |
| 6  | 41563406 | 41571942 | NM_02241 | chr6  | 41567315 | 41567970 |
| 6  | 41461824 | 41475330 | BC034887 | chr6  | 41474327 | 41475079 |

|    |          |          |          |       |          |          |
|----|----------|----------|----------|-------|----------|----------|
| 10 | 41176256 | 41184767 | NM_00921 | chr10 | 41178327 | 41178919 |
| 13 | 41118463 | 41127157 | NM_00810 | chr13 | 41119377 | 41119792 |
| 13 | 41078934 | 41087433 | NM_00854 | chr13 | 41081289 | 41081965 |
| 6  | 40970947 | 40980469 | M16122   | chr6  | 40976631 | 40977427 |
| 4  | 40905204 | 40913723 | NM_00829 | chr4  | 40905422 | 40906064 |
| X  | 40610470 | 40618969 | NM_17553 | chrX  | 40612753 | 40613356 |
| 6  | 40540418 | 40548917 | NM_00100 | chr6  | 40541595 | 40542441 |
| 6  | 40494964 | 40503463 | NM_14638 | chr6  | 40501083 | 40501906 |
| 9  | 40431033 | 40439718 | NM_13373 | chr9  | 40433454 | 40434116 |
| 4  | 40325936 | 40334675 | NM_00738 | chr4  | 40329719 | 40330456 |
| 14 | 40089349 | 40099876 | NM_00916 | chr14 | 40093174 | 40094125 |
| 6  | 40033860 | 40042359 | NM_00100 | chr6  | 40040167 | 40041174 |
| 9  | 40013788 | 40023048 | NM_17822 | chr9  | 40014277 | 40015051 |
| 18 | 39893471 | 39901991 | NM_01103 | chr18 | 39896142 | 39896735 |
| 9  | 39686833 | 39695332 | NM_14710 | chr9  | 39693357 | 39693976 |
| 1  | 39306695 | 39315194 | NM_05325 | chr1  | 39314459 | 39315147 |
| 10 | 39138331 | 39146830 | BC032149 | chr10 | 39139334 | 39139922 |
| 9  | 39067684 | 39076183 | NM_00101 | chr9  | 39072960 | 39073665 |
| 10 | 39053219 | 39062001 | NM_00805 | chr10 | 39059089 | 39060186 |
| 16 | 38717014 | 38725533 | NM_17892 | chr16 | 38723266 | 38723913 |
| 16 | 38717014 | 38725533 | NM_17892 | chr16 | 38720155 | 38721080 |
| 10 | 38648993 | 38657756 | NM_01068 | chr10 | 38653087 | 38653686 |
| 9  | 38621697 | 38630196 | NM_14681 | chr9  | 38621780 | 38622506 |
| 5  | 38601758 | 38610257 | NM_01350 | chr5  | 38604489 | 38605270 |
| 12 | 38384603 | 38393470 | NM_17868 | chr12 | 38389770 | 38390467 |
| 16 | 38211311 | 38220062 | NM_01093 | chr16 | 38217571 | 38218494 |
| 13 | 38197950 | 38214932 | NM_02638 | chr13 | 38209048 | 38209643 |
| 13 | 38197950 | 38214932 | NM_02638 | chr13 | 38202270 | 38202857 |
| 6  | 38051489 | 38060182 | NM_08046 | chr6  | 38052194 | 38053158 |
| 6  | 38036658 | 38045157 | BC046979 | chr6  | 38043935 | 38044524 |
| 6  | 38032961 | 38041468 | BC119477 | chr6  | 38039787 | 38040381 |
| 6  | 38036658 | 38045157 | BC046979 | chr6  | 38039787 | 38040381 |
| 5  | 38002813 | 38011388 | NM_02241 | chr5  | 38009139 | 38009745 |
| 6  | 37974088 | 37982604 | NM_17720 | chr6  | 37979832 | 37980476 |
| 16 | 37829735 | 37838234 | NM_15339 | chr16 | 37830198 | 37830822 |
| 18 | 37794309 | 37822874 | NM_03358 | chr18 | 37808794 | 37809532 |
| 16 | 37781628 | 37790138 | NM_17709 | chr16 | 37785965 | 37787071 |
| 19 | 37756998 | 37765527 | NM_00781 | chr19 | 37757227 | 37758254 |
| 9  | 37598491 | 37606990 | NM_14641 | chr9  | 37603341 | 37604459 |
| 18 | 37593514 | 37632802 | NM_05314 | chr18 | 37599889 | 37601271 |
| 1  | 37567289 | 37575788 | BC029089 | chr1  | 37571034 | 37571973 |
| 9  | 37547560 | 37556059 | NM_14688 | chr9  | 37553141 | 37553846 |
| 18 | 37541392 | 37549891 | NM_05313 | chr18 | 37547566 | 37548227 |
| 9  | 37516332 | 37524831 | NM_14674 | chr9  | 37522629 | 37523521 |
| 16 | 37493460 | 37502036 | NM_01354 | chr16 | 37495711 | 37496323 |
| 19 | 37493985 | 37502497 | NM_00824 | chr19 | 37494986 | 37495715 |
| 18 | 37454002 | 37470213 | NM_05313 | chr18 | 37461060 | 37461666 |

|    |          |          |          |       |          |          |
|----|----------|----------|----------|-------|----------|----------|
| 6  | 37453781 | 37462280 | NM_14536 | chr6  | 37460027 | 37460659 |
| 9  | 37459449 | 37467948 | NM_03055 | chr9  | 37459824 | 37460471 |
| 6  | 37453781 | 37462280 | NM_14536 | chr6  | 37455485 | 37456393 |
| 17 | 37436964 | 37445463 | NM_14629 | chr17 | 37444148 | 37444929 |
| 9  | 37404397 | 37412983 | NM_02528 | chr9  | 37407071 | 37407753 |
| 2  | 37399351 | 37407850 | NM_17693 | chr2  | 37403315 | 37403902 |
| 9  | 37360762 | 37369285 | NM_01144 | chr9  | 37366369 | 37367062 |
| 9  | 37299881 | 37308480 | NM_02202 | chr9  | 37307981 | 37308458 |
| 9  | 37282926 | 37291461 | NM_02051 | chr9  | 37289245 | 37290310 |
| 9  | 37271775 | 37280298 | NM_02710 | chr9  | 37274380 | 37274991 |
| 17 | 37265885 | 37274384 | NM_20715 | chr17 | 37267354 | 37267979 |
| 3  | 37222249 | 37230748 | BC027125 | chr3  | 37227132 | 37227785 |
| 9  | 37177306 | 37188672 | AF060570 | chr9  | 37185125 | 37185719 |
| 9  | 37145703 | 37158167 | NM_02878 | chr9  | 37152262 | 37153181 |
| 9  | 37145703 | 37158167 | NM_02878 | chr9  | 37148391 | 37149345 |
| 9  | 37111277 | 37119776 | NM_17518 | chr9  | 37118048 | 37118546 |
| 17 | 37068261 | 37076760 | NM_14683 | chr17 | 37073089 | 37073717 |
| 2  | 37035500 | 37043999 | NM_00100 | chr2  | 37036443 | 37037216 |
| 17 | 37007603 | 37016102 | NM_14651 | chr17 | 37013954 | 37014609 |
| 17 | 36984560 | 36993059 | NM_00101 | chr17 | 36991276 | 36991867 |
| 1  | 36965142 | 36976361 | NM_17733 | chr1  | 36971583 | 36972179 |
| 12 | 36885785 | 36894447 | NM_17862 | chr12 | 36891762 | 36892424 |
| 17 | 36837922 | 36846421 | NM_14651 | chr17 | 36842625 | 36843319 |
| 12 | 36818492 | 36827014 | NM_02531 | chr12 | 36820012 | 36820996 |
| 19 | 36796991 | 36807797 | NM_01685 | chr19 | 36802149 | 36802903 |
| 11 | 36785167 | 36793666 | NM_01185 | chr11 | 36786502 | 36787130 |
| 1  | 36700371 | 36708906 | NM_00953 | chr1  | 36706764 | 36707240 |
| 17 | 36691790 | 36707925 | NM_18271 | chr17 | 36706548 | 36707698 |
| 1  | 36700371 | 36708906 | NM_00953 | chr1  | 36705356 | 36705691 |
| 2  | 36679856 | 36688355 | NM_14694 | chr2  | 36680897 | 36681511 |
| 16 | 36607220 | 36615776 | NM_13410 | chr16 | 36613988 | 36614741 |
| 19 | 36438211 | 36446710 | NM_02950 | chr19 | 36443132 | 36443870 |
| 9  | 36436891 | 36445420 | NM_00739 | chr9  | 36437177 | 36437574 |
| 17 | 36414224 | 36422727 | NM_20161 | chr17 | 36414631 | 36415229 |
| 2  | 36299638 | 36308137 | NM_14695 | chr2  | 36307403 | 36308042 |
| 17 | 36277751 | 36286250 | NM_17763 | chr17 | 36279917 | 36280537 |
| 5  | 36204180 | 36212679 | NM_02737 | chr5  | 36211791 | 36212633 |
| 19 | 36182440 | 36190986 | NM_01346 | chr19 | 36183780 | 36184417 |
| 17 | 36149128 | 36157627 | NM_17763 | chr17 | 36153223 | 36153819 |
| 17 | 36067883 | 36076382 | NM_17763 | chr17 | 36074895 | 36075482 |
| 5  | 36038308 | 36046958 | NM_19434 | chr5  | 36044879 | 36045480 |
| 14 | 35989271 | 35997770 | BC049999 | chr14 | 35992109 | 35992761 |
| 14 | 35957690 | 35966205 | NM_02134 | chr14 | 35960283 | 35961284 |
| 14 | 35960076 | 35968575 | NM_14624 | chr14 | 35960283 | 35961284 |
| 17 | 35795703 | 35804204 | NM_00820 | chr17 | 35799007 | 35799547 |
| 17 | 35781074 | 35789573 | BC096040 | chr17 | 35784138 | 35784555 |
| 5  | 35589575 | 35598074 | NM_00741 | chr5  | 35593226 | 35593952 |

|   |    |          |          |          |       |          |          |
|---|----|----------|----------|----------|-------|----------|----------|
|   | 4  | 35334942 | 35343441 | NM_19915 | chr4  | 35339475 | 35340159 |
|   | 7  | 35291799 | 35300304 | NM_14584 | chr7  | 35297508 | 35298203 |
|   | 17 | 35267767 | 35287767 | NM_17513 | chr17 | 35278808 | 35279404 |
|   | 17 | 35249249 | 35257748 | NM_00103 | chr17 | 35254761 | 35255571 |
|   | 15 | 35234687 | 35243393 | NM_05404 | chr15 | 35238836 | 35239839 |
|   | 5  | 35226772 | 35236203 | NM_20727 | chr5  | 35230629 | 35231492 |
|   | 17 | 35072142 | 35080641 | NM_01039 | chr17 | 35076107 | 35077181 |
|   | 16 | 35068624 | 35078147 | NM_00101 | chr16 | 35070099 | 35070684 |
|   | 2  | 34925501 | 34934022 | BC038386 | chr2  | 34931901 | 34932516 |
|   | 2  | 34920170 | 34928682 | NM_17888 | chr2  | 34926831 | 34927498 |
|   | 2  | 34925501 | 34934022 | BC038386 | chr2  | 34926831 | 34927498 |
|   | 14 | 34918406 | 34926953 | NM_17500 | chr14 | 34923631 | 34924711 |
|   | 2  | 34920170 | 34928682 | NM_17888 | chr2  | 34922340 | 34922929 |
|   | 16 | 34835260 | 34843759 | AY237727 | chr16 | 34841274 | 34841872 |
|   | 17 | 34807458 | 34819403 | NM_01369 | chr17 | 34817885 | 34819085 |
|   | 17 | 34807458 | 34819403 | NM_01369 | chr17 | 34816318 | 34817209 |
| X |    | 34698507 | 34707082 | NM_01068 | chrX  | 34704735 | 34705345 |
|   | 9  | 34676681 | 34685180 | NM_00100 | chr9  | 34681330 | 34682329 |
|   | 7  | 34518790 | 34527436 | NM_17514 | chr7  | 34525505 | 34526157 |
|   | 7  | 34518790 | 34527436 | NM_17514 | chr7  | 34522903 | 34523557 |
|   | 17 | 34409956 | 34418455 | NM_00999 | chr17 | 34409467 | 34410071 |
|   | 1  | 34378446 | 34393807 | NM_17860 | chr1  | 34379455 | 34380259 |
|   | 4  | 34367154 | 34375653 | BC048388 | chr4  | 34371754 | 34372346 |
|   | 17 | 34349424 | 34357939 | NM_00978 | chr17 | 34350383 | 34351340 |
|   | 6  | 34278322 | 34286844 | NM_00801 | chr6  | 34285582 | 34286231 |
|   | 19 | 34277621 | 34288682 | AB066213 | chr19 | 34280241 | 34281055 |
|   | 4  | 34266163 | 34274707 | BC079564 | chr4  | 34271765 | 34272554 |
|   | 11 | 34208822 | 34217321 | NM_00102 | chr11 | 34216078 | 34217096 |
|   | 11 | 34208822 | 34217321 | NM_00102 | chr11 | 34212908 | 34214024 |
|   | 11 | 34105555 | 34114089 | NM_02390 | chr11 | 34105567 | 34106178 |
|   | 13 | 34082952 | 34091453 | NM_00945 | chr13 | 34086492 | 34087303 |
| X |    | 34065674 | 34078812 | NM_00102 | chrX  | 34073116 | 34073744 |
| X |    | 34065674 | 34078812 | NM_00102 | chrX  | 34066823 | 34067685 |
|   | 17 | 34018333 | 34026832 | NM_00100 | chr17 | 34023072 | 34023802 |
|   | 17 | 33978867 | 33987366 | NM_20140 | chr17 | 33986322 | 33987206 |
|   | 17 | 33949727 | 33958226 | NM_01038 | chr17 | 33953746 | 33954936 |
|   | 13 | 33910674 | 33919173 | NM_14894 | chr13 | 33910694 | 33911353 |
|   | 11 | 33857013 | 33865785 | NM_03116 | chr11 | 33862965 | 33863974 |
| X |    | 33814492 | 33822991 | NM_00103 | chrX  | 33820872 | 33821516 |
|   | 7  | 33720144 | 33728702 | NM_20350 | chr7  | 33726256 | 33727035 |
|   | 7  | 33724327 | 33732826 | NM_00959 | chr7  | 33726256 | 33727035 |
|   | 7  | 33720144 | 33728702 | NM_20350 | chr7  | 33721356 | 33722559 |
|   | 2  | 33706969 | 33715955 | NM_17518 | chr2  | 33708633 | 33709307 |
|   | 17 | 33689069 | 33705385 | NM_00820 | chr17 | 33689629 | 33690242 |
|   | 16 | 33639203 | 33647702 | NM_17525 | chr16 | 33645474 | 33646260 |
|   | 5  | 33415076 | 33423607 | NM_01981 | chr5  | 33421674 | 33422650 |
|   | 5  | 33415076 | 33423607 | NM_01981 | chr5  | 33415383 | 33416109 |

|    |          |          |          |       |          |          |
|----|----------|----------|----------|-------|----------|----------|
| 13 | 33194424 | 33202923 | NM_01146 | chr13 | 33202213 | 33202832 |
| 13 | 33194424 | 33202923 | NM_01146 | chr13 | 33194435 | 33195054 |
| 13 | 33028879 | 33037518 | NM_01145 | chr13 | 33033914 | 33034521 |
| 13 | 33028879 | 33037518 | NM_01145 | chr13 | 33030493 | 33031181 |
| 14 | 32979082 | 32987581 | NM_00891 | chr14 | 32979106 | 32979907 |
| 4  | 32938126 | 32946625 | NM_01199 | chr4  | 32940256 | 32940745 |
| 13 | 32902074 | 32911605 | NM_17305 | chr13 | 32905521 | 32906897 |
| 17 | 32873992 | 32882675 | NM_17771 | chr17 | 32879586 | 32880351 |
| 17 | 32873992 | 32882675 | NM_17771 | chr17 | 32875902 | 32876516 |
| 19 | 32817494 | 32826771 | NM_00896 | chr19 | 32820445 | 32821039 |
| 16 | 32714656 | 32723181 | NM_14607 | chr16 | 32714817 | 32715619 |
| 8  | 32647267 | 32663388 | NM_00101 | chr8  | 32647783 | 32648263 |
| 5  | 32624167 | 32632666 | BC033606 | chr5  | 32630947 | 32631691 |
| 19 | 32530055 | 32538572 | NM_01129 | chr19 | 32531303 | 32532001 |
| 18 | 32514240 | 32522783 | NM_00966 | chr18 | 32521575 | 32522394 |
| 15 | 32285853 | 32294352 | BC065137 | chr15 | 32290444 | 32291285 |
| 18 | 32278693 | 32288580 | NM_00104 | chr18 | 32281442 | 32282317 |
| 2  | 32201344 | 32215748 | NM_00849 | chr2  | 32209197 | 32209793 |
| 2  | 32172773 | 32183139 | NM_01006 | chr2  | 32172809 | 32174472 |
| 15 | 32115876 | 32124375 | NM_02050 | chr15 | 32120380 | 32120984 |
| 18 | 32090147 | 32098646 | NM_00102 | chr18 | 32096464 | 32097105 |
| 6  | 31974448 | 31982964 | NM_02958 | chr6  | 31979317 | 31980401 |
| 6  | 31974448 | 31982964 | NM_02958 | chr6  | 31976573 | 31977635 |
| 9  | 31951765 | 31960264 | NM_17737 | chr9  | 31959846 | 31960225 |
| 14 | 31814490 | 31822989 | NM_02625 | chr14 | 31817627 | 31818368 |
| 14 | 31814490 | 31822989 | NM_02625 | chr14 | 31816279 | 31816968 |
| 9  | 31660139 | 31668827 | NM_01380 | chr9  | 31667704 | 31668539 |
| 9  | 31660139 | 31668827 | NM_01380 | chr9  | 31660134 | 31660721 |
| 13 | 31627244 | 31635743 | NM_01022 | chr13 | 31628473 | 31629274 |
| 11 | 31267394 | 31276061 | NM_01149 | chr11 | 31273383 | 31274171 |
| 12 | 31164523 | 31173022 | NM_17204 | chr12 | 31167448 | 31168571 |
| 7  | 31005521 | 31014020 | NM_20726 | chr7  | 31012085 | 31012968 |
| 14 | 30982901 | 30997300 | NM_00103 | chr14 | 30983676 | 30984131 |
| 6  | 30841395 | 30851736 | NM_05407 | chr6  | 30845277 | 30845943 |
| 3  | 30784103 | 30796752 | NM_02969 | chr3  | 30794466 | 30795173 |
| 3  | 30786925 | 30796840 | NM_03055 | chr3  | 30794466 | 30795173 |
| 7  | 30757715 | 30770415 | NM_02200 | chr7  | 30762592 | 30763258 |
| 7  | 30762536 | 30771194 | NM_14455 | chr7  | 30762592 | 30763258 |
| 7  | 30650261 | 30658777 | NM_03254 | chr7  | 30650945 | 30651640 |
| 19 | 30595403 | 30611676 | NM_00103 | chr19 | 30596197 | 30596806 |
| 18 | 30560590 | 30569089 | BC092005 | chr18 | 30568499 | 30569030 |
| 7  | 30412496 | 30423508 | NM_01873 | chr7  | 30419467 | 30420482 |
| 10 | 30342706 | 30351233 | BC049997 | chr10 | 30343822 | 30344484 |
| 14 | 30318111 | 30326651 | NM_02893 | chr14 | 30320665 | 30321618 |
| 19 | 30292939 | 30301453 | NM_01077 | chr19 | 30300642 | 30301305 |
| 19 | 30292939 | 30301453 | NM_01077 | chr19 | 30293775 | 30294837 |
| 2  | 30232059 | 30240718 | NM_13874 | chr2  | 30238006 | 30238592 |



|    |          |          |          |       |          |          |
|----|----------|----------|----------|-------|----------|----------|
| 2  | 30235005 | 30243757 | NM_00776 | chr2  | 30238006 | 30238592 |
| 16 | 30184780 | 30193279 | NM_02790 | chr16 | 30187786 | 30188666 |
| 16 | 30184780 | 30193279 | NM_02790 | chr16 | 30185613 | 30186198 |
| 7  | 30116548 | 30125047 | NM_01166 | chr7  | 30120664 | 30121192 |
| 19 | 30063787 | 30072286 | NM_02574 | chr19 | 30066287 | 30067352 |
| 7  | 29956138 | 29964637 | BC026444 | chr7  | 29962706 | 29963192 |
| 5  | 29806758 | 29818418 | NM_01994 | chr5  | 29814280 | 29814869 |
| 14 | 29702549 | 29718032 | NM_01874 | chr14 | 29702901 | 29703496 |
| 10 | 29386276 | 29394783 | NM_00907 | chr10 | 29393788 | 29394393 |
| 14 | 29317666 | 29326165 | NM_02898 | chr14 | 29324079 | 29324785 |
| 17 | 29293901 | 29302400 | BC060066 | chr17 | 29296931 | 29298091 |
| 6  | 29102602 | 29120679 | NM_13392 | chr6  | 29102858 | 29103477 |
| 17 | 29081926 | 29094927 | NM_01371 | chr17 | 29092430 | 29092809 |
| 11 | 29066967 | 29075495 | NM_13403 | chr11 | 29072959 | 29073554 |
| 17 | 29039894 | 29048393 | NM_02373 | chr17 | 29042342 | 29042838 |
| 19 | 29023917 | 29032449 | NM_02892 | chr19 | 29030121 | 29030792 |
| 19 | 28975375 | 28983874 | AF087578 | chr19 | 28980433 | 28981030 |
| 17 | 28962304 | 28970809 | NM_15316 | chr17 | 28967428 | 28968240 |
| 13 | 28958648 | 28967147 | NM_00923 | chr13 | 28964518 | 28965332 |
| 14 | 28844312 | 28854141 | NM_17534 | chr14 | 28847910 | 28848716 |
| 14 | 28844312 | 28854141 | NM_17534 | chr14 | 28845110 | 28845634 |
| 14 | 28835319 | 28843905 | NM_01958 | chr14 | 28839819 | 28840432 |
| 2  | 28735932 | 28744677 | NM_01944 | chr2  | 28741400 | 28742020 |
| 19 | 28603918 | 28612417 | AY220846 | chr19 | 28608504 | 28609120 |
| 7  | 28584416 | 28592916 | NM_02189 | chr7  | 28587832 | 28588433 |
| 14 | 28546376 | 28554875 | NM_00978 | chr14 | 28548563 | 28549736 |
| 5  | 28490483 | 28499766 | NM_01013 | chr5  | 28492367 | 28492970 |
| 6  | 28394651 | 28405350 | NM_01103 | chr6  | 28395914 | 28396530 |
| 16 | 28357961 | 28366504 | NM_18306 | chr16 | 28365461 | 28366166 |
| 16 | 28357961 | 28366504 | NM_18306 | chr16 | 28363664 | 28364357 |
| 16 | 28357961 | 28366504 | NM_18306 | chr16 | 28358177 | 28358843 |
| 17 | 28347513 | 28356043 | NM_01679 | chr17 | 28352282 | 28352946 |
| 17 | 28271074 | 28279573 | NM_00103 | chr17 | 28272924 | 28273528 |
| 7  | 28216621 | 28225120 | NM_00102 | chr7  | 28219045 | 28219674 |
| 5  | 28166734 | 28175541 | NM_00831 | chr5  | 28167420 | 28168099 |
| 3  | 28084942 | 28093441 | BC119391 | chr3  | 28090222 | 28090896 |
| 6  | 28073706 | 28090379 | NM_00817 | chr6  | 28080445 | 28081375 |
| 13 | 28017687 | 28026187 | NM_01116 | chr13 | 28018953 | 28020017 |
| 2  | 28009001 | 28017601 | NM_00103 | chr2  | 28013485 | 28014104 |
| 17 | 28007873 | 28016372 | L28116   | chr17 | 28008479 | 28009210 |
| 7  | 27970641 | 27979140 | NM_19842 | chr7  | 27977785 | 27978654 |
| 14 | 27839265 | 27847920 | NM_17692 | chr14 | 27844350 | 27845316 |
| 14 | 27839265 | 27847920 | NM_17692 | chr14 | 27842967 | 27843907 |
| 13 | 27803119 | 27811623 | NM_01999 | chr13 | 27806314 | 27806656 |
| 5  | 27586871 | 27595370 | BC048383 | chr5  | 27594331 | 27595181 |
| 2  | 27525301 | 27535091 | U77684   | chr2  | 27528705 | 27529345 |
| 2  | 27493210 | 27501758 | NM_01130 | chr2  | 27494826 | 27495712 |

|    |          |          |          |       |          |          |
|----|----------|----------|----------|-------|----------|----------|
| 7  | 27455587 | 27464086 | BC094367 | chr7  | 27462728 | 27463326 |
| 17 | 27453979 | 27462540 | NM_01389 | chr17 | 27459877 | 27460760 |
| 8  | 27409334 | 27417833 | BC019450 | chr8  | 27410421 | 27411017 |
| 19 | 27383685 | 27392215 | NM_18317 | chr19 | 27389263 | 27389849 |
| 19 | 27383685 | 27392215 | NM_18317 | chr19 | 27385894 | 27386457 |
| 14 | 27326339 | 27335221 | NM_00952 | chr14 | 27334273 | 27334887 |
| 10 | 27303760 | 27312358 | NM_00848 | chr10 | 27307308 | 27307922 |
| 19 | 27278117 | 27287192 | NM_01370 | chr19 | 27282153 | 27282820 |
| 17 | 27278171 | 27295200 | NM_01666 | chr17 | 27278708 | 27279413 |
| 5  | 27229565 | 27238064 | BC085154 | chr5  | 27234751 | 27235481 |
| 2  | 26981242 | 26989741 | NM_13894 | chr2  | 26984142 | 26984950 |
| 8  | 26664398 | 26672994 | NM_17708 | chr8  | 26670825 | 26671472 |
| 9  | 26495008 | 26507261 | NM_02979 | chr9  | 26501878 | 26502654 |
| 9  | 26495008 | 26507261 | NM_02979 | chr9  | 26496878 | 26497477 |
| 8  | 26476798 | 26485328 | NM_02719 | chr8  | 26483075 | 26483693 |
| 8  | 26479834 | 26488450 | NM_00740 | chr8  | 26483075 | 26483693 |
| 8  | 26476798 | 26485328 | NM_02719 | chr8  | 26478902 | 26479530 |
| 5  | 26433602 | 26442101 | NM_20765 | chr5  | 26440081 | 26440890 |
| 5  | 26433602 | 26442101 | NM_20765 | chr5  | 26434719 | 26435660 |
| 8  | 26411847 | 26420346 | NM_15339 | chr8  | 26418490 | 26419080 |
| 2  | 26397092 | 26408388 | NM_19872 | chr2  | 26400747 | 26401755 |
| 5  | 26367737 | 26376290 | NM_02937 | chr5  | 26374242 | 26374918 |
| 8  | 26137799 | 26146300 | NM_01008 | chr8  | 26145455 | 26146134 |
| 8  | 26137799 | 26146300 | NM_01008 | chr8  | 26141723 | 26142653 |
| 10 | 25913123 | 25921622 | NM_00101 | chr10 | 25920449 | 25921222 |
| 14 | 25908649 | 25917148 | AF494209 | chr14 | 25908659 | 25909417 |
| 10 | 25765567 | 25774468 | NM_02988 | chr10 | 25773586 | 25774332 |
| 17 | 25710807 | 25719306 | NM_01583 | chr17 | 25712397 | 25713103 |
| 17 | 25558009 | 25585342 | NM_14599 | chr17 | 25582003 | 25582595 |
| 19 | 25566803 | 25575339 | NM_01582 | chr19 | 25572679 | 25573354 |
| 7  | 25522791 | 25531307 | NM_02877 | chr7  | 25529809 | 25530426 |
| 2  | 25495275 | 25507266 | NM_17803 | chr2  | 25500010 | 25500576 |
| 19 | 25483305 | 25491804 | BC050250 | chr19 | 25486735 | 25487392 |
| 2  | 25469127 | 25482463 | NM_00104 | chr2  | 25473732 | 25474083 |
| 2  | 25358595 | 25374903 | NM_00942 | chr2  | 25363728 | 25364435 |
| 2  | 25280604 | 25297745 | NM_15355 | chr2  | 25288060 | 25288668 |
| 13 | 25273034 | 25283417 | NM_00951 | chr13 | 25273054 | 25273774 |
| 2  | 25211912 | 25231538 | NM_00984 | chr2  | 25219649 | 25220526 |
| 18 | 25203239 | 25211738 | BC060607 | chr18 | 25203255 | 25203956 |
| 10 | 25183174 | 25191673 | BC055044 | chr10 | 25185800 | 25186743 |
| 10 | 25125003 | 25133502 | NM_01351 | chr10 | 25130297 | 25130928 |
| 10 | 25125003 | 25133502 | NM_01351 | chr10 | 25128600 | 25129114 |
| 2  | 25052924 | 25067906 | NM_08085 | chr2  | 25061147 | 25062001 |
| 2  | 25052924 | 25067906 | NM_08085 | chr2  | 25057783 | 25058715 |
| 17 | 25019994 | 25039476 | NM_17837 | chr17 | 25037986 | 25038317 |
| 2  | 25030887 | 25042640 | NM_02139 | chr2  | 25034931 | 25035810 |
| 2  | 25034754 | 25043254 | NM_02662 | chr2  | 25034931 | 25035810 |

|    |          |          |          |       |          |          |
|----|----------|----------|----------|-------|----------|----------|
| 7  | 25004187 | 25012715 | NM_00877 | chr7  | 25009997 | 25010653 |
| 19 | 24965907 | 24974406 | NM_00802 | chr19 | 24968832 | 24969513 |
| 2  | 24914659 | 24923158 | NM_17220 | chr2  | 24916024 | 24917544 |
| 17 | 24766703 | 24775202 | BC009019 | chr17 | 24772160 | 24772766 |
| 2  | 24754673 | 24763174 | NM_17840 | chr2  | 24760073 | 24760687 |
| 5  | 24726958 | 24735481 | NM_14490 | chr5  | 24727523 | 24728119 |
| 1  | 24539166 | 24547712 | NM_00773 | chr1  | 24538846 | 24539483 |
| 8  | 24517820 | 24526319 | NM_03115 | chr8  | 24520956 | 24521785 |
| 6  | 24472154 | 24480704 | NM_08084 | chr6  | 24476750 | 24477353 |
| 6  | 24475198 | 24483697 | NM_02661 | chr6  | 24476750 | 24477353 |
| 7  | 24430551 | 24440823 | NM_17759 | chr7  | 24434663 | 24435500 |
| 7  | 24430551 | 24440823 | NM_17759 | chr7  | 24431164 | 24432170 |
| 14 | 24413988 | 24422487 | NM_17526 | chr14 | 24421525 | 24422113 |
| 14 | 24413988 | 24422487 | NM_17526 | chr14 | 24418764 | 24419380 |
| 17 | 24370029 | 24391806 | NM_02305 | chr17 | 24384469 | 24385098 |
| 17 | 24370029 | 24391806 | NM_02305 | chr17 | 24370970 | 24371589 |
| 10 | 24278923 | 24287511 | NM_01021 | chr10 | 24284485 | 24285367 |
| 10 | 24278923 | 24287511 | NM_01021 | chr10 | 24281254 | 24281892 |
| 18 | 24262330 | 24270847 | NM_17262 | chr18 | 24268149 | 24268898 |
| 2  | 24161415 | 24169946 | NM_00103 | chr2  | 24167952 | 24168597 |
| 6  | 24115595 | 24124094 | NM_01948 | chr6  | 24118889 | 24119547 |
| 2  | 24092963 | 24101907 | NM_01945 | chr2  | 24093269 | 24094023 |
| 11 | 24057310 | 24065809 | BC010585 | chr11 | 24062836 | 24063735 |
| 11 | 24057310 | 24065809 | BC010585 | chr11 | 24059335 | 24060272 |
| 11 | 24057310 | 24065809 | BC010585 | chr11 | 24057324 | 24058367 |
| 7  | 24051982 | 24060483 | BC119486 | chr7  | 24053300 | 24054089 |
| 1  | 24038350 | 24046849 | NM_02660 | chr1  | 24044487 | 24045180 |
| 2  | 23994876 | 24011667 | NM_15351 | chr2  | 24000273 | 24000995 |
| 1  | 23981441 | 23989940 | BC083093 | chr1  | 23987395 | 23988487 |
| 13 | 23939122 | 23947621 | NM_17566 | chr13 | 23946574 | 23947259 |
| 5  | 23929384 | 23940089 | NM_00920 | chr5  | 23937462 | 23938252 |
| 5  | 23931070 | 23939604 | NM_00766 | chr5  | 23937462 | 23938252 |
| 17 | 23888860 | 23903038 | NM_17293 | chr17 | 23889687 | 23890455 |
| 13 | 23840925 | 23849593 | NM_13406 | chr13 | 23841345 | 23842280 |
| 10 | 23832733 | 23841302 | NM_01679 | chr10 | 23839928 | 23840575 |
| 10 | 23779211 | 23787710 | NM_00101 | chr10 | 23786434 | 23787122 |
| 7  | 23757534 | 23766033 | NM_20348 | chr7  | 23764568 | 23765056 |
| 7  | 23757534 | 23766033 | NM_20348 | chr7  | 23763203 | 23763973 |
| 10 | 23710638 | 23719137 | NM_00101 | chr10 | 23715495 | 23716434 |
| 7  | 23705871 | 23714370 | NM_20761 | chr7  | 23711661 | 23712732 |
| 7  | 23686822 | 23695321 | NM_20754 | chr7  | 23692861 | 23693447 |
| 10 | 23672563 | 23688897 | NM_00101 | chr10 | 23681479 | 23682182 |
| 7  | 23655174 | 23663673 | NM_20686 | chr7  | 23661088 | 23661707 |
| 10 | 23643910 | 23652409 | NM_00100 | chr10 | 23650312 | 23650973 |
| 10 | 23632974 | 23641473 | NM_00100 | chr10 | 23632995 | 23633616 |
| 17 | 23554232 | 23577794 | NM_02764 | chr17 | 23560199 | 23560794 |
| 19 | 23512920 | 23521449 | NM_17485 | chr19 | 23515419 | 23516033 |

|    |          |          |          |       |          |          |
|----|----------|----------|----------|-------|----------|----------|
| 8  | 23429320 | 23438640 | NM_02645 | chr8  | 23437656 | 23438245 |
| 8  | 23348463 | 23356966 | NM_13921 | chr8  | 23349243 | 23349833 |
| 16 | 23338467 | 23346966 | NM_00100 | chr16 | 23339271 | 23340040 |
| 1  | 23327645 | 23339333 | BC019747 | chr1  | 23336665 | 23337225 |
| 13 | 23189490 | 23197989 | NM_13423 | chr13 | 23191114 | 23192171 |
| 13 | 23164108 | 23172607 | NM_13423 | chr13 | 23171967 | 23172571 |
| 13 | 23137950 | 23146449 | NM_13422 | chr13 | 23142176 | 23142944 |
| 13 | 23137950 | 23146449 | NM_13422 | chr13 | 23140354 | 23141054 |
| 16 | 23064549 | 23073056 | U49915   | chr16 | 23071642 | 23072235 |
| 16 | 23064549 | 23073056 | U49915   | chr16 | 23064813 | 23065784 |
| 16 | 22967670 | 22976253 | NM_02312 | chr16 | 22975256 | 22975973 |
| 16 | 22967670 | 22976253 | NM_02312 | chr16 | 22973675 | 22974266 |
| 16 | 22967670 | 22976253 | NM_02312 | chr16 | 22972025 | 22972616 |
| 16 | 22941844 | 22950402 | NM_20137 | chr16 | 22945097 | 22946090 |
| 11 | 22734698 | 22743197 | AF092050 | chr11 | 22742312 | 22742995 |
| 16 | 22535049 | 22543548 | NM_13865 | chr16 | 22538315 | 22538955 |
| 12 | 22450725 | 22459224 | NM_00100 | chr12 | 22454141 | 22454829 |
| 11 | 22406286 | 22414795 | NM_15359 | chr11 | 22407543 | 22408215 |
| 13 | 22384003 | 22392502 | NM_13421 | chr13 | 22388348 | 22389276 |
| 16 | 21908296 | 21916795 | NM_15340 | chr16 | 21911226 | 21912099 |
| 13 | 21721109 | 21735596 | NM_17819 | chr13 | 21733818 | 21734548 |
| 19 | 21714406 | 21722905 | NM_14609 | chr19 | 21720101 | 21720700 |
| 19 | 21717386 | 21725888 | NM_02542 | chr19 | 21720101 | 21720700 |
| 9  | 21681435 | 21691175 | NM_14493 | chr9  | 21688646 | 21689361 |
| 13 | 21664287 | 21672786 | NM_14654 | chr13 | 21665704 | 21666742 |
| 16 | 21606098 | 21614597 | NM_00100 | chr16 | 21608852 | 21609807 |
| 9  | 21579466 | 21587965 | BC057368 | chr9  | 21583544 | 21584224 |
| 9  | 21579466 | 21587965 | BC057368 | chr9  | 21579856 | 21580466 |
| 16 | 21403860 | 21412359 | BC032214 | chr16 | 21411503 | 21412122 |
| 1  | 21329065 | 21337564 | NM_18332 | chr1  | 21336821 | 21337417 |
| 1  | 21329065 | 21337564 | NM_18332 | chr1  | 21335523 | 21336372 |
| 5  | 21276124 | 21284623 | BC004043 | chr5  | 21277385 | 21277989 |
| 17 | 21265741 | 21274242 | NM_00100 | chr17 | 21269496 | 21270194 |
| 5  | 21242972 | 21251483 | NM_02843 | chr5  | 21244434 | 21245312 |
| 1  | 21228900 | 21237399 | BC009805 | chr1  | 21234153 | 21235171 |
| 1  | 21228900 | 21237399 | BC009805 | chr1  | 21230620 | 21231990 |
| 13 | 21134163 | 21142662 | NM_01098 | chr13 | 21140673 | 21141362 |
| 2  | 21117478 | 21132850 | NM_17758 | chr2  | 21131357 | 21132271 |
| 16 | 21112777 | 21121277 | NM_01014 | chr16 | 21117087 | 21117693 |
| 9  | 21112357 | 21126395 | NM_00104 | chr9  | 21113819 | 21114390 |
| 9  | 20941443 | 20949942 | NM_01979 | chr9  | 20947435 | 20948017 |
| 17 | 20927523 | 20936022 | NM_13419 | chr17 | 20932447 | 20933188 |
| 17 | 20927523 | 20936022 | NM_13419 | chr17 | 20928456 | 20929045 |
| 1  | 20901407 | 20909906 | AF313617 | chr1  | 20908588 | 20909247 |
| 4  | 20867004 | 20875503 | NM_17298 | chr4  | 20869652 | 20870397 |
| X  | 20865859 | 20874416 | NM_02004 | chrX  | 20865851 | 20866445 |
| 10 | 20839903 | 20856400 | NM_01084 | chr10 | 20841085 | 20841863 |

|    |          |          |          |       |          |          |
|----|----------|----------|----------|-------|----------|----------|
| 18 | 20802290 | 20810922 | NM_01369 | chr18 | 20805915 | 20806503 |
| 14 | 20773831 | 20784153 | NM_14545 | chr14 | 20779850 | 20780459 |
| 18 | 20695117 | 20703755 | NM_00788 | chr18 | 20694503 | 20695637 |
| 17 | 20616534 | 20625033 | NM_13419 | chr17 | 20624303 | 20625016 |
| 17 | 20545248 | 20553747 | NM_13419 | chr17 | 20551839 | 20552440 |
| 14 | 20526454 | 20543174 | NM_00100 | chr14 | 20531113 | 20531904 |
| 18 | 20513739 | 20522344 | NM_18168 | chr18 | 20517360 | 20517972 |
| 18 | 20384350 | 20392849 | NM_18168 | chr18 | 20391677 | 20392828 |
| 16 | 20213406 | 20221905 | NM_00100 | chr16 | 20217106 | 20217600 |
| 18 | 20142608 | 20151107 | NM_00788 | chr18 | 20146559 | 20147376 |
| 14 | 20017381 | 20025880 | U26589   | chr14 | 20025105 | 20025765 |
| 3  | 19872122 | 19880621 | BC002189 | chr3  | 19877990 | 19878635 |
| 4  | 19847170 | 19855713 | NM_17540 | chr4  | 19852641 | 19853154 |
| 13 | 19757653 | 19766152 | BC125587 | chr13 | 19758321 | 19759195 |
| 9  | 19632258 | 19640757 | NM_14656 | chr9  | 19635758 | 19636384 |
| 16 | 19536165 | 19544664 | NM_14695 | chr16 | 19543804 | 19544634 |
| 5  | 19413596 | 19422184 | AB029485 | chr5  | 19414175 | 19414950 |
| 10 | 19396003 | 19404518 | NM_17278 | chr10 | 19399955 | 19400816 |
| 10 | 19305444 | 19313943 | NM_17825 | chr10 | 19312772 | 19313400 |
| 8  | 19287337 | 19295837 | NM_01375 | chr8  | 19294811 | 19295457 |
| 13 | 19186420 | 19194919 | M54990   | chr13 | 19189340 | 19190209 |
| 16 | 19152754 | 19161253 | M34598   | chr16 | 19159179 | 19159851 |
| 8  | 19151864 | 19160400 | NM_15311 | chr8  | 19157172 | 19157866 |
| 1  | 19082234 | 19090735 | NM_15315 | chr1  | 19086278 | 19086917 |
| 16 | 18974324 | 18982823 | BC002129 | chr16 | 18975023 | 18975972 |
| 13 | 18949836 | 18958335 | NM_17500 | chr13 | 18953632 | 18954277 |
| 9  | 18881394 | 18889896 | NM_14656 | chr9  | 18889215 | 18889807 |
| 10 | 18702284 | 18710826 | NM_00939 | chr10 | 18707346 | 18708009 |
| 19 | 18696212 | 18704828 | NM_01737 | chr19 | 18703481 | 18704101 |
| 16 | 18684410 | 18693037 | NM_01380 | chr16 | 18688975 | 18689850 |
| 16 | 18684410 | 18693037 | NM_01380 | chr16 | 18687543 | 18688120 |
| 16 | 18498033 | 18510234 | NM_01153 | chr16 | 18509483 | 18510196 |
| 16 | 18498033 | 18510234 | NM_01153 | chr16 | 18503285 | 18504018 |
| 14 | 18390784 | 18399283 | NM_00102 | chr14 | 18392107 | 18392827 |
| 14 | 18390784 | 18399283 | NM_00102 | chr14 | 18391205 | 18391842 |
| 7  | 18333704 | 18342203 | BC055476 | chr7  | 18340718 | 18341304 |
| 7  | 18321117 | 18329616 | BC120671 | chr7  | 18328037 | 18328624 |
| 16 | 18300151 | 18308716 | AF286214 | chr16 | 18302748 | 18303338 |
| 7  | 17977611 | 17986129 | NM_00767 | chr7  | 17982494 | 17983089 |
| 7  | 17977611 | 17986129 | NM_00767 | chr7  | 17977626 | 17978375 |
| 1  | 17581118 | 17589718 | NM_05319 | chr1  | 17583703 | 17584499 |
| 17 | 17528806 | 17538181 | NM_02920 | chr17 | 17536564 | 17537179 |
| 6  | 17435241 | 17443740 | NM_00859 | chr6  | 17440156 | 17440912 |
| 19 | 17404088 | 17412587 | U19265   | chr19 | 17410260 | 17410884 |
| 16 | 17313566 | 17322113 | NM_02334 | chr16 | 17313834 | 17314789 |
| 7  | 17162411 | 17170923 | NM_02721 | chr7  | 17164228 | 17164880 |
| 1  | 17080513 | 17089103 | NM_02060 | chr1  | 17086553 | 17087288 |

|   |    |          |          |          |       |          |          |
|---|----|----------|----------|----------|-------|----------|----------|
|   | 14 | 17061632 | 17070131 | BC087917 | chr14 | 17069590 | 17070031 |
|   | 11 | 16533611 | 16551541 | NM_02447 | chr11 | 16542246 | 16543456 |
|   | 19 | 16496781 | 16506050 | NM_00813 | chr19 | 16497095 | 16497703 |
|   | 16 | 16471213 | 16479759 | NM_13923 | chr16 | 16471600 | 16472190 |
|   | 7  | 16212655 | 16226910 | NM_01686 | chr7  | 16219372 | 16219983 |
|   | 11 | 16151775 | 16160274 | NM_14596 | chr11 | 16156562 | 16157495 |
| X |    | 16066224 | 16074723 | NM_01088 | chrX  | 16067120 | 16067822 |
|   | 5  | 16059374 | 16067948 | NM_01042 | chr5  | 16061055 | 16061735 |
|   | 7  | 15968411 | 15977344 | NM_13378 | chr7  | 15970015 | 15970622 |
|   | 1  | 15875437 | 15883936 | NM_00103 | chr1  | 15883043 | 15883610 |
|   | 18 | 15540522 | 15560000 | NM_00970 | chr18 | 15559010 | 15559596 |
|   | 18 | 15540522 | 15560000 | NM_00970 | chr18 | 15557661 | 15558592 |
|   | 14 | 15365978 | 15374739 | NM_01124 | chr14 | 15371852 | 15372556 |
|   | 9  | 15360050 | 15368549 | NM_18181 | chr9  | 15364249 | 15364948 |
|   | 17 | 15095209 | 15109986 | NM_02420 | chr17 | 15099590 | 15100258 |
|   | 9  | 15081159 | 15097487 | NM_17697 | chr9  | 15088843 | 15089473 |
|   | 9  | 14983438 | 14991975 | NM_02695 | chr9  | 14985636 | 14986267 |
|   | 1  | 14901568 | 14910076 | NM_17778 | chr1  | 14905089 | 14905673 |
|   | 9  | 14530858 | 14540954 | NM_01968 | chr9  | 14539525 | 14540139 |
|   | 9  | 14488627 | 14497126 | NM_17790 | chr9  | 14496432 | 14497028 |
|   | 9  | 14488627 | 14497126 | NM_17790 | chr9  | 14489638 | 14490240 |
|   | 16 | 14269138 | 14277637 | NM_00857 | chr16 | 14273475 | 14273887 |
|   | 9  | 14245016 | 14254812 | NM_02315 | chr9  | 14250425 | 14251296 |
|   | 9  | 14248380 | 14256879 | NM_17343 | chr9  | 14250425 | 14251296 |
|   | 14 | 14227273 | 14238140 | NM_14605 | chr14 | 14228199 | 14229274 |
|   | 5  | 14025282 | 14034150 | NM_01134 | chr5  | 14032443 | 14033498 |
|   | 5  | 14025282 | 14034150 | NM_01134 | chr5  | 14025400 | 14026022 |
|   | 16 | 13894184 | 13902735 | NM_14451 | chr16 | 13901840 | 13902737 |
|   | 16 | 13894996 | 13904199 | NM_02896 | chr16 | 13901840 | 13902737 |
|   | 16 | 13894184 | 13902735 | NM_14451 | chr16 | 13899476 | 13900097 |
|   | 16 | 13894996 | 13904199 | NM_02896 | chr16 | 13899476 | 13900097 |
|   | 16 | 13894184 | 13902735 | NM_14451 | chr16 | 13898117 | 13898736 |
|   | 16 | 13894996 | 13904199 | NM_02896 | chr16 | 13898117 | 13898736 |
|   | 19 | 13841633 | 13850132 | NM_14698 | chr19 | 13846784 | 13847740 |
|   | 8  | 13835850 | 13844349 | NM_15309 | chr8  | 13842405 | 13842938 |
|   | 8  | 13835850 | 13844349 | NM_15309 | chr8  | 13837990 | 13838807 |
|   | 8  | 13751667 | 13760166 | NM_02727 | chr8  | 13756473 | 13757091 |
|   | 13 | 13592183 | 13600682 | U37527   | chr13 | 13592923 | 13593697 |
|   | 19 | 13519035 | 13527534 | NM_14669 | chr19 | 13526774 | 13527493 |
|   | 2  | 13485805 | 13494746 | NM_01170 | chr2  | 13493983 | 13494584 |
|   | 2  | 13485805 | 13494746 | NM_01170 | chr2  | 13486595 | 13487072 |
|   | 5  | 13396790 | 13408167 | NM_00915 | chr5  | 13402024 | 13402669 |
|   | 9  | 13174534 | 13183138 | BC127147 | chr9  | 13181379 | 13181866 |
|   | 17 | 13141000 | 13149499 | BC061173 | chr17 | 13148015 | 13148665 |
|   | 17 | 13141000 | 13149499 | BC061173 | chr17 | 13145022 | 13145761 |
|   | 14 | 13115380 | 13123879 | NM_14702 | chr14 | 13117903 | 13118711 |
|   | 14 | 12966885 | 12975384 | NM_14639 | chr14 | 12968487 | 12969341 |

|    |          |          |          |       |          |          |
|----|----------|----------|----------|-------|----------|----------|
| 12 | 12963950 | 12973694 | NM_00870 | chr12 | 12964208 | 12965027 |
| 15 | 12821918 | 12830417 | AF440766 | chr15 | 12827186 | 12827853 |
| 15 | 12821918 | 12830417 | AF440766 | chr15 | 12823334 | 12823978 |
| 17 | 12708576 | 12717075 | NM_00855 | chr17 | 12715466 | 12715838 |
| 17 | 12712966 | 12721837 | NM_03072 | chr17 | 12715466 | 12715838 |
| 8  | 12567026 | 12575525 | NM_02427 | chr8  | 12572801 | 12573438 |
| 18 | 12377395 | 12385922 | NM_00872 | chr18 | 12384576 | 12385186 |
| 19 | 12363676 | 12372175 | NM_14668 | chr19 | 12365946 | 12366540 |
| 19 | 12329277 | 12342941 | NM_14668 | chr19 | 12334722 | 12335714 |
| 19 | 12270613 | 12279112 | NM_14641 | chr19 | 12270621 | 12271064 |
| 19 | 12185220 | 12193719 | NM_14668 | chr19 | 12187492 | 12188685 |
| 7  | 12171462 | 12182824 | NM_01071 | chr7  | 12174520 | 12175438 |
| 7  | 12175160 | 12184574 | NM_17731 | chr7  | 12174520 | 12175438 |
| 14 | 12072047 | 12080599 | NM_02805 | chr14 | 12079860 | 12080446 |
| 14 | 12075406 | 12083905 | NM_17781 | chr14 | 12079860 | 12080446 |
| 19 | 11808604 | 11817117 | NM_00811 | chr19 | 11811502 | 11812016 |
| 11 | 11778154 | 11786653 | AF071068 | chr11 | 11783344 | 11784396 |
| 8  | 11776534 | 11785106 | U96634   | chr8  | 11779795 | 11780578 |
| 19 | 11755576 | 11764101 | NM_13335 | chr19 | 11763895 | 11765025 |
| 19 | 11756086 | 11766599 | NM_00103 | chr19 | 11763895 | 11765025 |
| 19 | 11705313 | 11713879 | NM_13324 | chr19 | 11706821 | 11707551 |
| 4  | 11679362 | 11687885 | NM_01975 | chr4  | 11684259 | 11685301 |
| 8  | 11676215 | 11684722 | NM_02427 | chr8  | 11680342 | 11680865 |
| 2  | 11630116 | 11643516 | BC095982 | chr2  | 11632294 | 11632910 |
| 2  | 11617296 | 11626163 | NM_13383 | chr2  | 11621942 | 11623078 |
| 19 | 11330678 | 11339194 | NM_00764 | chr19 | 11335352 | 11335945 |
| 7  | 11266129 | 11274628 | NM_13423 | chr7  | 11268248 | 11269132 |
| 2  | 11162398 | 11170897 | AB062122 | chr2  | 11163359 | 11164248 |
| 2  | 11162398 | 11170897 | AB062122 | chr2  | 11162420 | 11163050 |
| 18 | 11046506 | 11056992 | NM_01025 | chr18 | 11049651 | 11050255 |
| 16 | 10999010 | 11007509 | NM_13410 | chr16 | 11006847 | 11007463 |
| 12 | 10923772 | 10932304 | BC108372 | chr12 | 10923776 | 10924368 |
| 19 | 10801992 | 10810491 | NM_20752 | chr19 | 10803195 | 10803994 |
| 1  | 10702645 | 10711157 | NM_17783 | chr1  | 10708746 | 10709648 |
| 16 | 10696004 | 10716404 | NM_00989 | chr16 | 10705760 | 10706407 |
| 15 | 10632653 | 10641152 | AF202315 | chr15 | 10638203 | 10638862 |
| 19 | 10547419 | 10555973 | NM_13368 | chr19 | 10550837 | 10551747 |
| 12 | 10389987 | 10398551 | NM_02758 | chr12 | 10395130 | 10396170 |
| 3  | 10186431 | 10197108 | NM_02440 | chr3  | 10191539 | 10192181 |
| 8  | 10147883 | 10156382 | BC072580 | chr8  | 10152860 | 10153652 |
| 2  | 9963967  | 9972469  | NM_02774 | chr2  | 9965742  | 9966778  |
| 1  | 9847624  | 9856123  | BC018363 | chr1  | 9853785  | 9854423  |
| 12 | 9594505  | 9607599  | NM_01185 | chr12 | 9603321  | 9604089  |
| 12 | 9594505  | 9607599  | NM_01185 | chr12 | 9596075  | 9596671  |
| X  | 9403318  | 9411825  | NM_00876 | chrX  | 9407510  | 9408269  |
| 1  | 9281288  | 9290452  | NM_02767 | chr1  | 9286486  | 9287502  |
| X  | 8997906  | 9009161  | NM_02609 | chrX  | 9006067  | 9006704  |

|   |    |         |         |          |       |         |         |
|---|----|---------|---------|----------|-------|---------|---------|
|   | 3  | 8904397 | 8912930 | NM_02543 | chr3  | 8911509 | 8912190 |
|   | 17 | 8820535 | 8829057 | NM_02585 | chr17 | 8826127 | 8826728 |
|   | 6  | 8725596 | 8734107 | NM_01049 | chr6  | 8727018 | 8727608 |
|   | 12 | 8694429 | 8703188 | NM_03072 | chr12 | 8695661 | 8696512 |
|   | 19 | 8652334 | 8662748 | NM_03119 | chr19 | 8659525 | 8660237 |
|   | 19 | 8652334 | 8662748 | NM_03119 | chr19 | 8654276 | 8654951 |
|   | 3  | 8647560 | 8656112 | NM_01042 | chr3  | 8650779 | 8651648 |
|   | 16 | 8577246 | 8593474 | NM_02582 | chr16 | 8582417 | 8583010 |
|   | 16 | 8422810 | 8431309 | NM_17296 | chr16 | 8427235 | 8427587 |
|   | 10 | 8206516 | 8215015 | NM_17738 | chr10 | 8211204 | 8211817 |
|   | 4  | 8163663 | 8172188 | NM_00759 | chr4  | 8163784 | 8164785 |
| X |    | 8141132 | 8149631 | BC104363 | chrX  | 8141179 | 8142184 |
|   | 9  | 7832972 | 7843585 | NM_00746 | chr9  | 7840316 | 7841134 |
|   | 9  | 7686101 | 7694621 | NM_01081 | chr9  | 7691124 | 7691845 |
|   | 6  | 7640681 | 7649199 | NM_01205 | chr6  | 7646707 | 7647371 |
|   | 10 | 7516660 | 7525159 | NM_17278 | chr10 | 7519110 | 7519656 |
|   | 14 | 7457527 | 7466026 | NM_02893 | chr14 | 7463545 | 7464150 |
|   | 15 | 7342836 | 7351519 | NM_17874 | chr15 | 7348365 | 7349149 |
|   | 9  | 7341374 | 7349920 | NM_00860 | chr9  | 7345356 | 7346079 |
|   | 19 | 7044975 | 7069081 | NM_01169 | chr19 | 7046502 | 7047219 |
|   | 18 | 7002255 | 7010754 | NM_17759 | chr18 | 7006918 | 7008069 |
|   | 16 | 6979156 | 6987655 | NM_18318 | chr16 | 6984731 | 6985317 |
|   | 14 | 6884122 | 6892621 | NM_14545 | chr14 | 6884924 | 6885952 |
| X |    | 6808348 | 6817991 | NM_17509 | chrX  | 6810402 | 6810955 |
|   | 14 | 6783505 | 6792061 | NM_00787 | chr14 | 6783846 | 6784574 |
|   | 13 | 6645457 | 6653976 | NM_01970 | chr13 | 6649505 | 6650109 |
|   | 17 | 6629891 | 6638438 | NM_00951 | chr17 | 6635657 | 6636272 |
|   | 15 | 6595101 | 6603602 | BC083354 | chr15 | 6599786 | 6600499 |
| X |    | 6577408 | 6585907 | AF038507 | chrX  | 6582886 | 6583517 |
|   | 11 | 6552536 | 6561039 | NM_01951 | chr11 | 6558528 | 6559038 |
|   | 19 | 6540352 | 6549006 | NM_00920 | chr19 | 6547894 | 6548599 |
|   | 19 | 6540352 | 6549006 | NM_00920 | chr19 | 6542326 | 6542922 |
|   | 11 | 6536132 | 6544652 | NM_01170 | chr11 | 6537538 | 6538370 |
|   | 11 | 6366372 | 6381920 | NM_01122 | chr11 | 6370817 | 6371419 |
|   | 15 | 6270771 | 6279270 | NM_19864 | chr15 | 6278030 | 6278711 |
|   | 18 | 6133597 | 6142096 | NM_00103 | chr18 | 6140585 | 6141245 |
|   | 2  | 6044907 | 6056844 | NM_14488 | chr2  | 6056540 | 6057116 |
|   | 13 | 5854735 | 5863291 | NM_01180 | chr13 | 5854798 | 5855490 |
|   | 11 | 5755877 | 5764449 | NM_00963 | chr11 | 5763139 | 5764025 |
|   | 6  | 5669808 | 5678410 | NM_01006 | chr6  | 5677865 | 5678377 |
|   | 1  | 5572574 | 5581137 | NM_01101 | chr1  | 5579508 | 5580420 |
|   | 19 | 5555052 | 5570573 | NM_00103 | chr19 | 5558375 | 5559253 |
|   | 19 | 5558058 | 5566646 | NM_01993 | chr19 | 5558375 | 5559253 |
|   | 17 | 5372695 | 5381249 | NM_17534 | chr17 | 5379994 | 5380773 |
| X |    | 5216983 | 5225736 | NM_02143 | chrX  | 5217191 | 5217827 |
|   | 6  | 5178331 | 5186830 | BC005714 | chr6  | 5179409 | 5180279 |
|   | 16 | 5168763 | 5177277 | NM_02744 | chr16 | 5169462 | 5170274 |



|   |    |         |         |          |       |         |         |
|---|----|---------|---------|----------|-------|---------|---------|
|   | 19 | 5142652 | 5151151 | BC034670 | chr19 | 5143784 | 5144608 |
|   | 6  | 5141309 | 5149824 | NM_01113 | chr6  | 5142567 | 5143569 |
|   | 19 | 5062078 | 5070577 | NM_05404 | chr19 | 5068603 | 5069550 |
|   | 19 | 5062078 | 5070577 | NM_05404 | chr19 | 5062681 | 5063289 |
|   | 18 | 5040585 | 5049084 | NM_15315 | chr18 | 5047627 | 5048341 |
|   | 18 | 5040585 | 5049084 | NM_15315 | chr18 | 5042271 | 5042985 |
|   | 1  | 5007008 | 5015716 | NM_02137 | chr1  | 5007354 | 5007979 |
|   | 10 | 4704730 | 4713323 | NM_01170 | chr10 | 4711891 | 4712563 |
|   | 2  | 4663989 | 4672488 | BC056476 | chr2  | 4666556 | 4667154 |
| X |    | 4509172 | 4517671 | BC117727 | chrX  | 4513410 | 4514294 |
|   | 7  | 4353490 | 4362181 | NM_18340 | chr7  | 4361587 | 4362566 |
|   | 9  | 4303833 | 4316194 | NM_02696 | chr9  | 4304323 | 4305043 |
|   | 14 | 4277097 | 4285596 | NM_02594 | chr14 | 4284898 | 4286008 |
|   | 14 | 4277097 | 4285596 | NM_02594 | chr14 | 4281639 | 4282248 |
|   | 14 | 4277097 | 4285596 | NM_02594 | chr14 | 4276824 | 4277667 |
|   | 12 | 4239070 | 4247926 | NM_13404 | chr12 | 4245341 | 4245932 |
|   | 13 | 4226986 | 4235485 | NM_00101 | chr13 | 4230234 | 4231034 |
|   | 8  | 4214813 | 4223312 | NM_20720 | chr8  | 4215881 | 4216732 |
|   | 19 | 4142663 | 4158371 | NM_01177 | chr19 | 4149688 | 4150345 |
|   | 11 | 4080792 | 4089363 | NM_13402 | chr11 | 4081571 | 4082451 |
|   | 2  | 4064143 | 4072643 | NM_17247 | chr2  | 4068428 | 4069323 |
|   | 11 | 4045169 | 4057431 | BC046392 | chr11 | 4052722 | 4053358 |
|   | 11 | 4045169 | 4057431 | BC046392 | chr11 | 4050925 | 4052094 |
|   | 19 | 3973523 | 4005886 | NM_00100 | chr19 | 3986969 | 3987698 |
|   | 19 | 3973523 | 4005886 | NM_00100 | chr19 | 3979033 | 3979655 |
|   | 12 | 3948967 | 3957466 | NM_00889 | chr12 | 3948971 | 3949590 |
|   | 4  | 3944230 | 3952810 | NM_18198 | chr4  | 3946709 | 3947651 |
|   | 4  | 3944230 | 3952810 | NM_18198 | chr4  | 3944530 | 3945254 |
|   | 6  | 3915855 | 3924359 | NM_00936 | chr6  | 3916874 | 3917507 |
|   | 4  | 3898226 | 3906728 | BC080838 | chr4  | 3903308 | 3904036 |
|   | 11 | 3877639 | 3886215 | NM_01692 | chr11 | 3882459 | 3883126 |
|   | 8  | 3851787 | 3860308 | NM_13090 | chr8  | 3855235 | 3855923 |
|   | 12 | 3829021 | 3837520 | AF068625 | chr12 | 3832498 | 3833198 |
|   | 4  | 3830356 | 3838855 | AF057366 | chr4  | 3831884 | 3832530 |
|   | 13 | 3831002 | 3839519 | NM_02003 | chr13 | 3831019 | 3831683 |
|   | 13 | 3801049 | 3809562 | NM_02741 | chr13 | 3806305 | 3807011 |
|   | 13 | 3801049 | 3809562 | NM_02741 | chr13 | 3801608 | 3802707 |
|   | 11 | 3789250 | 3797783 | NM_17374 | chr11 | 3797174 | 3797684 |
|   | 11 | 3792602 | 3801101 | NM_02615 | chr11 | 3797174 | 3797684 |
|   | 5  | 3657010 | 3665651 | NM_02914 | chr5  | 3660619 | 3661488 |
|   | 16 | 3630814 | 3639325 | NM_01945 | chr16 | 3638531 | 3638905 |
|   | 10 | 3555233 | 3563948 | NM_00103 | chr10 | 3555350 | 3555967 |
|   | 11 | 3402325 | 3410824 | NM_17243 | chr11 | 3402564 | 3403439 |
|   | 2  | 3281342 | 3289863 | NM_14592 | chr2  | 3287849 | 3288729 |
|   | 11 | 3268880 | 3277395 | NM_17305 | chr11 | 3274115 | 3274708 |
|   | 15 | 3214767 | 3223505 | NM_00104 | chr15 | 3218480 | 3219105 |
|   | 11 | 3018018 | 3032526 | NM_00100 | chr11 | 3023587 | 3024401 |

| gene overlap percent | region overlap percent | length(bps) | probes in r | p-value(region) | Fraction of |   |
|----------------------|------------------------|-------------|-------------|-----------------|-------------|---|
| 0.0693588            |                        | 1           | 596         | 13              | 0.0475716   | 0 |
| 0.0589412            |                        | 1           | 501         | 14              | 0.0312671   | 0 |
| 0.122475             |                        | 1           | 1061        | 26              | 0.0283187   | 0 |
| 0.0538824            |                        | 1           | 458         | 13              | 0.0477922   | 0 |
| 0.162353             |                        | 1           | 1380        | 35              | 0.0365636   | 0 |
| 0.0842854            |                        | 1           | 723         | 19              | 0.033624    | 0 |
| 0.0439382            |                        | 1           | 677         | 18              | 0.0441553   | 0 |
| 0.0964449            |                        | 1           | 822         | 19              | 0.0294045   | 0 |
| 0.121249             |                        | 1           | 1895        | 47              | 0.0171166   | 0 |
| 0.145313             |                        | 1           | 1251        | 32              | 0.0111315   | 0 |
| 0.0743529            |                        | 1           | 632         | 18              | 0.0499638   | 0 |
| 0.0722018            |                        | 1           | 667         | 12              | 0.0302784   | 0 |
| 0.0407014            |                        | 1           | 376         | 11              | 0.0480571   | 0 |
| 0.0238071            |                        | 1           | 469         | 13              | 0.0449762   | 0 |
| 0.0298985            |                        | 1           | 589         | 16              | 0.0370933   | 0 |
| 0.105647             |                        | 1           | 898         | 21              | 0.0186702   | 0 |
| 0.0703529            |                        | 1           | 598         | 17              | 0.049902    | 0 |
| 0.0965882            |                        | 1           | 821         | 23              | 0.0344362   | 0 |
| 0.057446             |                        | 1           | 758         | 22              | 0.0187055   | 0 |
| 0.0903558            |                        | 1           | 772         | 18              | 0.0483925   | 0 |
| 0.0865882            |                        | 1           | 736         | 21              | 0.0335623   | 0 |
| 0.00376028           | 0.0465793              |             | 687         | 19              | 0.0493371   | 0 |
| 0.0808235            |                        | 1           | 687         | 19              | 0.0493371   | 0 |
| 0.0829412            |                        | 1           | 705         | 19              | 0.0416218   | 0 |
| 0.038012             |                        | 1           | 644         | 18              | 0.040483    | 0 |
| 0.0407272            |                        | 1           | 690         | 13              | 0.0338624   | 0 |
| 0.0695294            |                        | 1           | 591         | 12              | 0.0495224   | 0 |
| 0.133682             |                        | 1           | 1149        | 31              | 0.0229692   | 0 |
| 0.0968235            |                        | 1           | 823         | 18              | 0.0151834   | 0 |
| 0.071715             |                        | 1           | 626         | 17              | 0.0486485   | 0 |
| 0.0769848            |                        | 1           | 672         | 19              | 0.0418866   | 0 |
| 0.0658296            |                        | 1           | 561         | 12              | 0.0446232   | 0 |
| 0.0783854            |                        | 1           | 668         | 19              | 0.0173108   | 0 |
| 0.0782353            |                        | 1           | 665         | 19              | 0.0370138   | 0 |
| 0.0786778            |                        | 1           | 676         | 19              | 0.0352483   | 0 |
| 0.0437666            |                        | 1           | 594         | 17              | 0.0417983   | 0 |
| 0.0704706            |                        | 1           | 599         | 12              | 0.0397592   | 0 |
| 0.0427487            |                        | 1           | 721         | 18              | 0.0431931   | 0 |
| 0.0688235            |                        | 1           | 585         | 14              | 0.0420102   | 0 |
| 0.0353231            |                        | 1           | 445         | 13              | 0.0475009   | 0 |
| 0.0698824            |                        | 1           | 594         | 13              | 0.0478364   | 0 |
| 0.113176             |                        | 1           | 962         | 26              | 0.0123762   | 0 |
| 0.0747489            |                        | 1           | 640         | 14              | 0.0495931   | 0 |
| 0.0748235            |                        | 1           | 636         | 11              | 0.0450557   | 0 |

|           |          |      |    |           |          |
|-----------|----------|------|----|-----------|----------|
| 0.0267612 | 1        | 604  | 17 | 0.0382938 | 0        |
| 0.0605882 | 1        | 515  | 13 | 0.0387264 | 0        |
| 0.0698659 | 1        | 594  | 17 | 0.0468124 | 0        |
| 0.0735621 | 1        | 628  | 11 | 0.0487015 | 0        |
| 0.072625  | 1        | 620  | 15 | 0.0222807 | 0        |
| 0.0674659 | 1        | 574  | 11 | 0.0347363 | 0        |
| 0.0688073 | 1        | 585  | 15 | 0.0481807 | 0        |
| 0.102235  | 1        | 869  | 22 | 0.0249201 | 0        |
| 0.0905801 | 1        | 776  | 19 | 0.0254145 | 0        |
| 0.0698824 | 1        | 594  | 12 | 0.047139  | 0        |
| 0.0734661 | 1        | 631  | 12 | 0.0453382 | 0        |
| 0.0705554 | 0.988581 | 613  | 16 | 0.0373493 | 0        |
| 0.0701631 | 1        | 598  | 17 | 0.0466888 | 0        |
| 0.0702353 | 1        | 597  | 17 | 0.0480747 | 0        |
| 0.0691765 | 1        | 588  | 17 | 0.0472449 | 0        |
| 0.0831765 | 1        | 707  | 20 | 0.0174344 | 0        |
| 0.0880356 | 1        | 752  | 19 | 0.0212832 | 0        |
| 0.0955615 | 1        | 816  | 21 | 0.0310994 | 0        |
| 0.0805882 | 1        | 685  | 18 | 0.0481895 | 0        |
| 0.0711765 | 1        | 605  | 17 | 0.0479688 | 0        |
| 0.0711765 | 1        | 605  | 17 | 0.0479688 | 0        |
| 0.0510138 | 1        | 863  | 20 | 0.0228898 | 0        |
| 0.0695294 | 1        | 591  | 16 | 0.0450116 | 0        |
| 0.131882  | 1        | 1121 | 31 | 0.0482601 | 0        |
| 0.0749412 | 1        | 637  | 18 | 0.0381261 | 0        |
| 0.116824  | 1        | 993  | 28 | 0.0186702 | 0        |
| 0.177156  | 1        | 1506 | 33 | 0.0359192 | 0.285714 |
| 0.0698379 | 1        | 599  | 16 | 0.0476245 | 0        |
| 0.101434  | 1        | 870  | 25 | 0.0174432 | 0        |
| 0.0802585 | 1        | 683  | 12 | 0.0499815 | 0        |
| 0.100412  | 1        | 854  | 24 | 0.0238167 | 0        |
| 0.0736038 | 1        | 626  | 11 | 0.0185643 | 0        |
| 0.0878553 | 1        | 748  | 15 | 0.0465122 | 0        |
| 0.0844035 | 1        | 723  | 20 | 0.0468918 | 0        |
| 0.0816396 | 1        | 723  | 20 | 0.0468918 | 0        |
| 0.0853888 | 1        | 727  | 18 | 0.035522  | 0        |
| 0.0598824 | 0.894552 | 569  | 16 | 0.0422132 | 0        |
| 0.0734713 | 1        | 632  | 18 | 0.046574  | 0        |
| 0.0364554 | 1        | 585  | 10 | 0.0305874 | 0        |
| 0.0702373 | 1        | 598  | 17 | 0.0274889 | 0        |
| 0.0748707 | 1        | 637  | 18 | 0.0469536 | 0        |
| 0.0952989 | 1        | 821  | 18 | 0.02462   | 0        |
| 0.0757416 | 1        | 646  | 17 | 0.0359633 | 0        |
| 0.0720364 | 1        | 618  | 10 | 0.041251  | 0        |
| 0.071337  | 1        | 612  | 17 | 0.0287601 | 0        |
| 0.0832549 | 1        | 708  | 20 | 0.0211508 | 0        |
| 0.0801121 | 1        | 686  | 18 | 0.022007  | 0        |

|           |   |      |    |           |   |
|-----------|---|------|----|-----------|---|
| 0.0847003 | 1 | 852  | 24 | 0.0484631 | 0 |
| 0.124706  | 1 | 1060 | 30 | 0.0248583 | 0 |
| 0.0708421 | 1 | 604  | 16 | 0.0411451 | 0 |
| 0.0715294 | 1 | 608  | 16 | 0.0466976 | 0 |
| 0.133294  | 1 | 1133 | 25 | 0.0368814 | 0 |
| 0.0638266 | 1 | 845  | 24 | 0.0354425 | 0 |
| 0.120706  | 1 | 1026 | 21 | 0.0368461 | 0 |
| 0.0910588 | 1 | 774  | 22 | 0.0235077 | 0 |
| 0.0969412 | 1 | 824  | 21 | 0.0472538 | 0 |
| 0.111647  | 1 | 949  | 19 | 0.0168076 | 0 |
| 0.111059  | 1 | 949  | 19 | 0.0168076 | 0 |
| 0.162     | 1 | 1377 | 37 | 0.0353631 | 0 |
| 0.161147  | 1 | 1377 | 37 | 0.0353631 | 0 |
| 0.121882  | 1 | 1036 | 28 | 0.0141947 | 0 |
| 0.12124   | 1 | 1036 | 28 | 0.0141947 | 0 |
| 0.105647  | 1 | 898  | 26 | 0.031991  | 0 |
| 0.0787833 | 1 | 834  | 22 | 0.032141  | 0 |
| 0.0560174 | 1 | 593  | 17 | 0.0481807 | 0 |
| 0.0790588 | 1 | 672  | 19 | 0.0407302 | 0 |
| 0.0681525 | 1 | 581  | 16 | 0.049849  | 0 |
| 0.0957647 | 1 | 814  | 23 | 0.0342685 | 0 |
| 0.0771765 | 1 | 656  | 19 | 0.0436786 | 0 |
| 0.0717647 | 1 | 610  | 17 | 0.0449321 | 0 |
| 0.0690546 | 1 | 588  | 17 | 0.0498579 | 0 |
| 0.0702353 | 1 | 597  | 15 | 0.0399887 | 0 |
| 0.0702353 | 1 | 597  | 15 | 0.0399887 | 0 |
| 0.0658579 | 1 | 570  | 16 | 0.0429106 | 0 |
| 0.113412  | 1 | 964  | 25 | 0.0324323 | 0 |
| 0.0716373 | 1 | 613  | 17 | 0.0458325 | 0 |
| 0.0536232 | 1 | 666  | 19 | 0.0380113 | 0 |
| 0.0770531 | 1 | 957  | 22 | 0.0187497 | 0 |
| 0.0487923 | 1 | 606  | 17 | 0.044888  | 0 |
| 0.0530277 | 1 | 613  | 17 | 0.0461503 | 0 |
| 0.07      | 1 | 595  | 17 | 0.0499638 | 0 |
| 0.0709336 | 1 | 604  | 15 | 0.0492753 | 0 |
| 0.14143   | 1 | 1203 | 29 | 0.0134267 | 0 |
| 0.0695744 | 1 | 595  | 13 | 0.0438375 | 0 |
| 0.11242   | 1 | 964  | 23 | 0.0491517 | 0 |
| 0.1124    | 1 | 979  | 27 | 0.0245758 | 0 |
| 0.0716471 | 1 | 609  | 16 | 0.0485426 | 0 |
| 0.0723599 | 1 | 616  | 14 | 0.0466976 | 0 |
| 0.0765823 | 1 | 657  | 18 | 0.0472008 | 0 |
| 0.0464913 | 1 | 638  | 15 | 0.039768  | 0 |
| 0.0476572 | 1 | 654  | 19 | 0.0495666 | 0 |
| 0.0946787 | 1 | 806  | 23 | 0.0475274 | 0 |
| 0.0955294 | 1 | 812  | 23 | 0.0446055 | 0 |
| 0.100911  | 1 | 942  | 20 | 0.035981  | 0 |

|           |          |      |    |           |          |
|-----------|----------|------|----|-----------|----------|
| 0.0746971 | 1        | 635  | 11 | 0.030861  | 0        |
| 0.0697647 | 1        | 593  | 17 | 0.0441553 | 0        |
| 0.0725267 | 1        | 618  | 13 | 0.0471125 | 0        |
| 0.0564703 | 1        | 487  | 14 | 0.0363782 | 0        |
| 0.0831181 | 1        | 708  | 19 | 0.0326177 | 0        |
| 0.0652829 | 0.795198 | 708  | 19 | 0.0326177 | 0        |
| 0.077517  | 1        | 1275 | 33 | 0.0363959 | 0.833333 |
| 0.036965  | 1        | 608  | 13 | 0.049902  | 0        |
| 0.0755712 | 1        | 645  | 16 | 0.0438816 | 0        |
| 0.0499196 | 1        | 590  | 12 | 0.0449321 | 0        |
| 0.0691433 | 1        | 590  | 12 | 0.0449321 | 0        |
| 0.0848235 | 1        | 721  | 20 | 0.0211684 | 0        |
| 0.0830588 | 1        | 706  | 20 | 0.0275595 | 0        |
| 0.0714118 | 1        | 607  | 16 | 0.0483219 | 0        |
| 0.0647747 | 1        | 598  | 17 | 0.0465829 | 0        |
| 0.0714118 | 1        | 607  | 17 | 0.0489663 | 0        |
| 0.0728298 | 1        | 620  | 16 | 0.0429459 | 0        |
| 0.0635359 | 1        | 575  | 16 | 0.044835  | 0        |
| 0.0318058 | 1        | 676  | 19 | 0.0446055 | 0        |
| 0.120824  | 1        | 1027 | 27 | 0.0294663 | 0        |
| 0.05946   | 1        | 643  | 11 | 0.0127028 | 0        |
| 0.068612  | 1        | 609  | 16 | 0.0457089 | 0        |
| 0.076851  | 1        | 656  | 19 | 0.0335269 | 0        |
| 0.0394118 | 1        | 335  | 10 | 0.049134  | 0        |
| 0.142118  | 1        | 1208 | 33 | 0.013974  | 0        |
| 0.0826252 | 1        | 739  | 20 | 0.046424  | 0        |
| 0.0832552 | 1        | 710  | 20 | 0.0363782 | 0        |
| 0.0715291 | 1        | 610  | 16 | 0.0464858 | 0        |
| 0.0697647 | 1        | 593  | 16 | 0.047907  | 0        |
| 0.104811  | 1        | 891  | 25 | 0.0127911 | 0        |
| 0.106891  | 1        | 909  | 20 | 0.0331739 | 0        |
| 0.0914118 | 1        | 777  | 19 | 0.0417983 | 0        |
| 0.0761176 | 1        | 647  | 18 | 0.0391413 | 0        |
| 0.0723469 | 1        | 619  | 17 | 0.0456736 | 0        |
| 0.0728235 | 1        | 619  | 17 | 0.0456736 | 0        |
| 0.0867059 | 1        | 737  | 21 | 0.0475009 | 0        |
| 0.0533194 | 1        | 763  | 19 | 0.0317879 | 0        |
| 0.0759911 | 1        | 646  | 17 | 0.0468653 | 0        |
| 0.0595111 | 1        | 1003 | 28 | 0.0184937 | 0        |
| 0.0549891 | 1        | 809  | 22 | 0.0483572 | 0        |
| 0.0503418 | 1        | 626  | 18 | 0.0445878 | 0        |
| 0.113341  | 1        | 1022 | 26 | 0.0107166 | 0        |
| 0.120235  | 1        | 1022 | 26 | 0.0107166 | 0        |
| 0.08      | 1        | 680  | 19 | 0.0463798 | 0        |
| 0.0732769 | 1        | 623  | 13 | 0.0362547 | 0        |
| 0.0543006 | 1        | 500  | 14 | 0.0496107 | 0        |
| 0.0703529 | 1        | 598  | 16 | 0.030658  | 0        |

|           |         |      |    |           |      |
|-----------|---------|------|----|-----------|------|
| 0.0995294 | 1       | 846  | 24 | 0.0268004 | 0    |
| 0.0717647 | 1       | 610  | 11 | 0.0376935 | 0    |
| 0.106118  | 1       | 902  | 25 | 0.0253174 | 0    |
| 0.0929412 | 1       | 790  | 23 | 0.034904  | 0    |
| 0.0945882 | 1       | 804  | 19 | 0.0193411 | 0    |
| 0.0855294 | 1       | 727  | 19 | 0.0345156 | 0    |
| 0.0730202 | 1       | 639  | 17 | 0.0489486 | 0    |
| 0.0538276 | 1       | 469  | 13 | 0.0207359 | 0    |
| 0.0471265 | 1       | 688  | 19 | 0.0243993 | 0    |
| 0.0818438 | 1       | 696  | 20 | 0.0358574 | 0    |
| 0.0888235 | 1       | 755  | 21 | 0.0333857 | 0    |
| 0.120588  | 1       | 1025 | 23 | 0.0493282 | 0    |
| 0.0695062 | 1       | 594  | 17 | 0.0423103 | 0    |
| 0.0987059 | 1       | 839  | 18 | 0.022519  | 0    |
| 0.0728235 | 1       | 619  | 12 | 0.0496901 | 0    |
| 0.0624706 | 1       | 531  | 12 | 0.0487015 | 0    |
| 0.144706  | 1       | 1230 | 33 | 0.0478982 | 0.75 |
| 0.0307966 | 1       | 484  | 14 | 0.0384968 | 0    |
| 0.0350226 | 1       | 651  | 12 | 0.0481453 | 0    |
| 0.03968   | 1       | 620  | 10 | 0.0431666 | 0    |
| 0.0715283 | 1       | 615  | 17 | 0.0475186 | 0    |
| 0.111882  | 1       | 951  | 26 | 0.0355396 | 0    |
| 0.0563977 | 1       | 666  | 14 | 0.027842  | 0    |
| 0.0660083 | 1       | 635  | 18 | 0.0414011 | 0    |
| 0.0979481 | 1       | 864  | 24 | 0.0337476 | 0    |
| 0.0743529 | 1       | 632  | 16 | 0.0229163 | 0    |
| 0.072474  | 1       | 619  | 14 | 0.0466358 | 0    |
| 0.0998823 | 1       | 849  | 24 | 0.0347805 | 0    |
| 0.142105  | 1       | 1215 | 32 | 0.015916  | 0    |
| 0.080701  | 1       | 723  | 21 | 0.0360516 | 0    |
| 0.0655237 | 1       | 558  | 16 | 0.0451705 | 0    |
| 0.0441633 | 1       | 726  | 16 | 0.0357162 | 0    |
| 0.072171  | 1       | 618  | 16 | 0.0444466 | 0    |
| 0.0698824 | 1       | 594  | 13 | 0.0495489 | 0    |
| 0.0701176 | 1       | 596  | 17 | 0.0407655 | 0    |
| 0.088793  | 1       | 988  | 23 | 0.0328825 | 0    |
| 0.115246  | 1       | 988  | 23 | 0.0328825 | 0    |
| 0.0782935 | 1       | 668  | 13 | 0.0311347 | 0    |
| 0.0869109 | 1       | 745  | 16 | 0.0308346 | 0    |
| 0.10382   | 1       | 886  | 24 | 0.0341537 | 0    |
| 0.08015   | 1       | 684  | 19 | 0.03644   | 0    |
| 0.0831765 | 1       | 707  | 20 | 0.0483219 | 0    |
| 0.0696471 | 1       | 592  | 17 | 0.0443671 | 0    |
| 0.116847  | 1       | 996  | 23 | 0.0175756 | 0    |
| 0.0643529 | 1       | 547  | 15 | 0.0434844 | 0    |
| 0.108706  | 0.93712 | 986  | 17 | 0.0446673 | 0    |
| 0.0894118 | 1       | 760  | 21 | 0.0344538 | 0    |

|           |   |      |    |            |   |
|-----------|---|------|----|------------|---|
| 0.0810588 | 1 | 689  | 19 | 0.0433432  | 0 |
| 0.0851765 | 1 | 724  | 16 | 0.0499638  | 0 |
| 0.0724706 | 1 | 616  | 11 | 0.0449321  | 0 |
| 0.124765  | 1 | 1062 | 29 | 0.0363871  | 0 |
| 0.0663442 | 1 | 919  | 26 | 0.0150421  | 0 |
| 0.0720319 | 1 | 614  | 15 | 0.0434579  | 0 |
| 0.0499104 | 1 | 585  | 16 | 0.0472979  | 0 |
| 0.0688235 | 1 | 585  | 16 | 0.0472979  | 0 |
| 0.0982353 | 1 | 835  | 23 | 0.0314525  | 0 |
| 0.0785882 | 1 | 668  | 17 | 0.0458325  | 0 |
| 0.0798127 | 1 | 699  | 20 | 0.0313642  | 0 |
| 0.123202  | 1 | 1079 | 18 | 0.0126587  | 0 |
| 0.0497361 | 1 | 688  | 14 | 0.036696   | 0 |
| 0.069401  | 1 | 599  | 13 | 0.0315672  | 0 |
| 0.0695294 | 1 | 591  | 14 | 0.0396444  | 0 |
| 0.0383387 | 1 | 384  | 10 | 0.0399887  | 0 |
| 0.0399347 | 1 | 612  | 17 | 0.0479953  | 0 |
| 0.0719661 | 1 | 612  | 17 | 0.0479953  | 0 |
| 0.0775294 | 1 | 659  | 17 | 0.039256   | 0 |
| 0.0527553 | 1 | 606  | 17 | 0.0483925  | 0 |
| 0.0817647 | 1 | 695  | 20 | 0.0308964  | 0 |
| 0.0703364 | 1 | 598  | 17 | 0.0432725  | 0 |
| 0.0680086 | 1 | 598  | 17 | 0.0432725  | 0 |
| 0.0978824 | 1 | 832  | 24 | 0.0243993  | 0 |
| 0.0831867 | 1 | 709  | 20 | 0.0478011  | 0 |
| 0.0661384 | 1 | 651  | 19 | 0.0452499  | 0 |
| 0.0992584 | 1 | 977  | 28 | 0.0234283  | 0 |
| 0.103312  | 1 | 889  | 25 | 0.0209477  | 0 |
| 0.041248  | 1 | 665  | 19 | 0.0355396  | 0 |
| 0.0831897 | 1 | 1158 | 33 | 0.00533183 | 0 |
| 0.0863529 | 1 | 734  | 21 | 0.0489486  | 0 |
| 0.0784706 | 1 | 667  | 19 | 0.0484808  | 0 |
| 0.090824  | 1 | 776  | 16 | 0.0344715  | 0 |
| 0.0527848 | 1 | 562  | 15 | 0.0335623  | 0 |
| 0.0722594 | 1 | 615  | 15 | 0.0404919  | 0 |
| 0.0572941 | 1 | 487  | 12 | 0.0475539  | 0 |
| 0.0602422 | 1 | 607  | 11 | 0.0391324  | 0 |
| 0.0844706 | 1 | 718  | 21 | 0.0344627  | 0 |
| 0.0688359 | 1 | 586  | 12 | 0.0439611  | 0 |
| 0.101529  | 1 | 863  | 21 | 0.00571141 | 0 |
| 0.115529  | 1 | 982  | 27 | 0.026871   | 0 |
| 0.036378  | 1 | 826  | 18 | 0.0218834  | 0 |
| 0.0388003 | 1 | 881  | 18 | 0.0279391  | 0 |
| 0.0347926 | 1 | 790  | 20 | 0.0230222  | 0 |
| 0.0728235 | 1 | 619  | 16 | 0.0492223  | 0 |
| 0.0845882 | 1 | 719  | 16 | 0.0488957  | 0 |
| 0.097035  | 1 | 828  | 23 | 0.0309758  | 0 |

|           |          |      |    |            |   |
|-----------|----------|------|----|------------|---|
| 0.0979841 | 1        | 836  | 17 | 0.0242934  | 0 |
| 0.0743529 | 1        | 632  | 18 | 0.0347893  | 0 |
| 0.0946406 | 1        | 807  | 18 | 0.0185819  | 0 |
| 0.0724706 | 1        | 616  | 16 | 0.0478982  | 0 |
| 0.110654  | 1        | 942  | 25 | 0.0179993  | 0 |
| 0.071629  | 1        | 1200 | 27 | 0.00606451 | 0 |
| 0.0442906 | 1        | 742  | 21 | 0.0295634  | 0 |
| 0.0702353 | 1        | 597  | 17 | 0.0498402  | 0 |
| 0.0791634 | 1        | 704  | 19 | 0.0376494  | 0 |
| 0.0856471 | 1        | 728  | 14 | 0.0366695  | 0 |
| 0.104093  | 1        | 885  | 25 | 0.032141   | 0 |
| 0.0716471 | 1        | 609  | 16 | 0.0374287  | 0 |
| 0.0982353 | 1        | 835  | 24 | 0.0330591  | 0 |
| 0.087845  | 1        | 748  | 21 | 0.0249731  | 0 |
| 0.120353  | 1        | 1023 | 27 | 0.0286365  | 0 |
| 0.118235  | 1        | 1005 | 23 | 0.029325   | 0 |
| 0.0709984 | 1        | 613  | 11 | 0.0384439  | 0 |
| 0.0532731 | 1        | 625  | 15 | 0.00931304 | 0 |
| 0.0511422 | 1        | 600  | 17 | 0.0477922  | 0 |
| 0.0696471 | 1        | 592  | 17 | 0.0471831  | 0 |
| 0.123059  | 1        | 1046 | 28 | 0.0341449  | 0 |
| 0.102961  | 1        | 897  | 24 | 0.0357691  | 0 |
| 0.0719991 | 1        | 613  | 17 | 0.0455765  | 0 |
| 0.0744706 | 1        | 633  | 11 | 0.0461856  | 0 |
| 0.118941  | 1        | 1011 | 26 | 0.0436786  | 0 |
| 0.136253  | 1        | 1173 | 31 | 0.00637347 | 0 |
| 0.0915321 | 1        | 788  | 22 | 0.0484102  | 0 |
| 0.120471  | 1        | 1024 | 25 | 0.0353807  | 0 |
| 0.072664  | 1        | 626  | 18 | 0.0406684  | 0 |
| 0.0963529 | 1        | 819  | 21 | 0.0290161  | 0 |
| 0.0897647 | 1        | 763  | 17 | 0.0346745  | 0 |
| 0.0290896 | 1        | 648  | 18 | 0.0382673  | 0 |
| 0.0404649 | 1        | 470  | 14 | 0.04796    | 0 |
| 0.0946391 | 1        | 805  | 18 | 0.0403683  | 0 |
| 0.0885886 | 1        | 767  | 17 | 0.0464946  | 0 |
| 0.0839892 | 1        | 843  | 24 | 0.0482336  | 0 |
| 0.0505882 | 1        | 430  | 12 | 0.0435639  | 0 |
| 0.0742494 | 0.992284 | 648  | 16 | 0.0226867  | 0 |
| 0.0755294 | 1        | 642  | 18 | 0.0227838  | 0 |
| 0.0976471 | 1        | 830  | 23 | 0.035981   | 0 |
| 0.147176  | 1        | 1251 | 29 | 0.0240197  | 0 |
| 0.0445882 | 1        | 379  | 11 | 0.0417277  | 0 |
| 0.10402   | 1        | 885  | 22 | 0.0340125  | 0 |
| 0.100035  | 1        | 853  | 24 | 0.0354072  | 0 |
| 0.0882353 | 1        | 750  | 19 | 0.0329796  | 0 |
| 0.0572128 | 1        | 491  | 14 | 0.0359987  | 0 |
| 0.0666593 | 1        | 603  | 12 | 0.0459649  | 0 |



|           |          |      |    |            |          |
|-----------|----------|------|----|------------|----------|
| 0.0705744 | 1        | 602  | 14 | 0.0473509  | 0        |
| 0.0709412 | 1        | 603  | 17 | 0.0423721  | 0        |
| 0.0742592 | 1        | 639  | 16 | 0.0346657  | 0        |
| 0.0752941 | 1        | 640  | 18 | 0.0397945  | 0        |
| 0.080727  | 1        | 1146 | 31 | 0.0184584  | 0        |
| 0.0930359 | 1        | 855  | 21 | 0.0285747  | 0        |
| 0.0970588 | 1        | 825  | 21 | 0.0253438  | 0        |
| 0.17996   | 1        | 1532 | 38 | 0.0241786  | 0.384615 |
| 0.0692941 | 1        | 589  | 12 | 0.0494165  | 0        |
| 0.0376965 | 1        | 868  | 16 | 0.0390088  | 0        |
| 0.119008  | 0.977799 | 1036 | 28 | 0.0345156  | 0        |
| 0.109529  | 0.898649 | 1036 | 28 | 0.0345156  | 0        |
| 0.0416385 | 1        | 617  | 13 | 0.0468124  | 0        |
| 0.0409821 | 1        | 666  | 19 | 0.041048   | 0        |
| 0.0702353 | 1        | 597  | 10 | 0.049443   | 0        |
| 0.144353  | 1        | 1227 | 26 | 0.00916297 | 0        |
| 0.100585  | 1        | 860  | 21 | 0.0344185  | 0        |
| 0.0870588 | 1        | 740  | 20 | 0.0353542  | 0        |
| 0.0825629 | 1        | 1027 | 27 | 0.0219187  | 0        |
| 0.0500284 | 1        | 705  | 20 | 0.0225102  | 0        |
| 0.0913729 | 1        | 788  | 22 | 0.0469095  | 0        |
| 0.0405756 | 1        | 595  | 16 | 0.0481718  | 0        |
| 0.0865892 | 1        | 738  | 21 | 0.0357427  | 0        |
| 0.0693702 | 1        | 597  | 17 | 0.0487986  | 0        |
| 0.0367301 | 1        | 625  | 17 | 0.0477746  | 0        |
| 0.0365538 | 1        | 622  | 14 | 0.0379319  | 0        |
| 0.0854801 | 1        | 730  | 21 | 0.0321322  | 0        |
| 0.03544   | 1        | 586  | 17 | 0.0499726  | 0        |
| 0.0708119 | 1        | 607  | 15 | 0.0450557  | 0        |
| 0.11449   | 1        | 979  | 27 | 0.0214332  | 0        |
| 0.0858033 | 1        | 744  | 16 | 0.0254233  | 0        |
| 0.0727844 | 1        | 625  | 18 | 0.0371551  | 0        |
| 0.0770586 | 1        | 656  | 19 | 0.0450204  | 0        |
| 0.0873053 | 1        | 751  | 16 | 0.0221041  | 0        |
| 0.0703529 | 1        | 598  | 17 | 0.0498402  | 0        |
| 0.0732126 | 1        | 639  | 15 | 0.035672   | 0        |
| 0.0685123 | 1        | 589  | 17 | 0.0335887  | 0        |
| 0.0726107 | 1        | 623  | 18 | 0.0367313  | 0        |
| 0.0720911 | 1        | 614  | 17 | 0.0445261  | 0        |
| 0.0316626 | 1        | 669  | 18 | 0.032653   | 0        |
| 0.100224  | 1        | 852  | 22 | 0.0166222  | 0        |
| 0.0564085 | 1        | 485  | 13 | 0.0420455  | 0        |
| 0.0697838 | 1        | 597  | 12 | 0.0337388  | 0        |
| 0.0771489 | 1        | 657  | 18 | 0.0383291  | 0        |
| 0.0710588 | 1        | 604  | 17 | 0.0238167  | 0        |
| 0.0645377 | 1        | 578  | 11 | 0.0353984  | 0        |
| 0.0853286 | 1        | 727  | 20 | 0.0338624  | 0        |

|           |          |      |    |           |   |
|-----------|----------|------|----|-----------|---|
| 0.0798379 | 1        | 1064 | 29 | 0.0498402 | 0 |
| 0.0587207 | 1        | 672  | 19 | 0.0364489 | 0 |
| 0.0808961 | 1        | 733  | 20 | 0.0314878 | 0 |
| 0.0858943 | 1        | 1009 | 20 | 0.0239403 | 0 |
| 0.0572941 | 1        | 487  | 14 | 0.0439611 | 0 |
| 0.0689412 | 1        | 586  | 16 | 0.047598  | 0 |
| 0.0817753 | 1        | 866  | 24 | 0.0215921 | 0 |
| 0.0692941 | 1        | 589  | 11 | 0.0423457 | 0 |
| 0.0754118 | 1        | 641  | 12 | 0.0342067 | 0 |
| 0.0774118 | 1        | 658  | 17 | 0.0427252 | 0 |
| 0.082282  | 1        | 750  | 20 | 0.0357162 | 0 |
| 0.09631   | 1        | 830  | 23 | 0.0114052 | 0 |
| 0.0919158 | 1        | 830  | 23 | 0.0114052 | 0 |
| 0.0664478 | 1        | 587  | 17 | 0.0488427 | 0 |
| 0.0874118 | 1        | 743  | 17 | 0.0410568 | 0 |
| 0.0650053 | 1        | 553  | 15 | 0.0453029 | 0 |
| 0.108941  | 1        | 926  | 26 | 0.0251055 | 0 |
| 0.0769412 | 1        | 654  | 14 | 0.0367049 | 0 |
| 0.0829125 | 1        | 706  | 17 | 0.032247  | 0 |
| 0.0731421 | 1        | 622  | 14 | 0.0256175 | 0 |
| 0.0730476 | 1        | 622  | 14 | 0.0256175 | 0 |
| 0.0744706 | 1        | 633  | 18 | 0.0353366 | 0 |
| 0.0721176 | 1        | 613  | 17 | 0.0478275 | 0 |
| 0.125542  | 1        | 1071 | 27 | 0.0241433 | 0 |
| 0.0976471 | 1        | 830  | 21 | 0.035928  | 0 |
| 0.0743792 | 1        | 641  | 18 | 0.0350541 | 0 |
| 0.067446  | 1        | 825  | 22 | 0.0435727 | 0 |
| 0.0765882 | 1        | 651  | 18 | 0.0230928 | 0 |
| 0.126685  | 1        | 1081 | 23 | 0.0103282 | 0 |
| 0.0703859 | 1        | 622  | 18 | 0.0390795 | 0 |
| 0.0491765 | 1        | 418  | 12 | 0.0422309 | 0 |
| 0.070967  | 1        | 604  | 17 | 0.0461944 | 0 |
| 0.0881213 | 1        | 750  | 15 | 0.0346834 | 0 |
| 0.0738061 | 1        | 663  | 17 | 0.0481807 | 0 |
| 0.0721968 | 1        | 631  | 18 | 0.0431666 | 0 |
| 0.059633  | 0.803487 | 631  | 18 | 0.0431666 | 0 |
| 0.0816829 | 1        | 697  | 16 | 0.0451175 | 0 |
| 0.0671874 | 1        | 714  | 20 | 0.0458237 | 0 |
| 0.0580334 | 1        | 769  | 21 | 0.0494518 | 0 |
| 0.0321566 | 1        | 777  | 22 | 0.0207976 | 0 |
| 0.109294  | 1        | 929  | 26 | 0.0290073 | 0 |
| 0.0962353 | 1        | 818  | 23 | 0.0361311 | 0 |
| 0.0570198 | 1        | 768  | 17 | 0.0280539 | 0 |
| 0.0397951 | 1        | 536  | 15 | 0.0453294 | 0 |
| 0.13012   | 1        | 1115 | 30 | 0.0176904 | 0 |
| 0.0482492 | 0.369507 | 1115 | 30 | 0.0176904 | 0 |
| 0.0498943 | 1        | 425  | 12 | 0.0409774 | 0 |

|           |   |      |    |            |   |
|-----------|---|------|----|------------|---|
| 0.0344923 | 1 | 499  | 13 | 0.0497784  | 0 |
| 0.0529481 | 1 | 766  | 21 | 0.0396179  | 0 |
| 0.0777986 | 1 | 663  | 19 | 0.0480924  | 0 |
| 0.084517  | 1 | 720  | 21 | 0.0345951  | 0 |
| 0.0402208 | 1 | 634  | 18 | 0.0459914  | 0 |
| 0.131412  | 1 | 1117 | 27 | 0.0134267  | 0 |
| 0.090367  | 1 | 879  | 23 | 0.0393443  | 0 |
| 0.123927  | 1 | 1054 | 23 | 0.0426193  | 0 |
| 0.0791765 | 1 | 673  | 17 | 0.0234636  | 0 |
| 0.119442  | 1 | 1018 | 28 | 0.0253438  | 0 |
| 0.0909304 | 1 | 775  | 21 | 0.0498137  | 0 |
| 0.0677389 | 1 | 577  | 11 | 0.0336329  | 0 |
| 0.0726375 | 1 | 618  | 12 | 0.0423015  | 0 |
| 0.0723329 | 1 | 617  | 17 | 0.0361929  | 0 |
| 0.0585375 | 1 | 891  | 25 | 0.0354513  | 0 |
| 0.0710807 | 1 | 613  | 17 | 0.049496   | 0 |
| 0.0797979 | 1 | 679  | 19 | 0.0342331  | 0 |
| 0.108     | 1 | 918  | 26 | 0.032653   | 0 |
| 0.129765  | 1 | 1103 | 28 | 0.00606451 | 0 |
| 0.0869412 | 1 | 739  | 20 | 0.0366784  | 0 |
| 0.0685882 | 1 | 583  | 11 | 0.0231634  | 0 |
| 0.131529  | 1 | 1118 | 30 | 0.034701   | 0 |
| 0.0728235 | 1 | 619  | 13 | 0.0403242  | 0 |
| 0.0698824 | 1 | 594  | 17 | 0.0434314  | 0 |
| 0.0535957 | 1 | 632  | 18 | 0.0483572  | 0 |
| 0.068645  | 1 | 1152 | 29 | 0.0203474  | 0 |
| 0.0945882 | 1 | 804  | 22 | 0.0368638  | 0 |
| 0.0460653 | 1 | 408  | 12 | 0.0344097  | 0 |
| 0.0530495 | 1 | 648  | 18 | 0.0453382  | 0 |
| 0.0698824 | 1 | 594  | 17 | 0.0241786  | 0 |
| 0.0519694 | 1 | 442  | 10 | 0.0499638  | 0 |
| 0.0710612 | 1 | 608  | 10 | 0.0452499  | 0 |
| 0.0797357 | 1 | 700  | 16 | 0.0449498  | 0 |
| 0.0681293 | 1 | 590  | 17 | 0.0487898  | 0 |
| 0.119486  | 1 | 1051 | 26 | 0.0383556  | 0 |
| 0.0791765 | 1 | 673  | 19 | 0.0464593  | 0 |
| 0.0753964 | 1 | 642  | 18 | 0.0228103  | 0 |
| 0.0905461 | 1 | 771  | 16 | 0.0319821  | 0 |
| 0.0435224 | 1 | 600  | 11 | 0.047854   | 0 |
| 0.0667765 | 1 | 608  | 16 | 0.0482866  | 0 |
| 0.0562353 | 1 | 478  | 10 | 0.0434491  | 0 |
| 0.106118  | 1 | 902  | 25 | 0.0239314  | 0 |
| 0.0822353 | 1 | 699  | 17 | 0.0234812  | 0 |
| 0.0721176 | 1 | 613  | 16 | 0.0498844  | 0 |
| 0.0916088 | 1 | 857  | 20 | 0.0329796  | 0 |
| 0.0742807 | 1 | 1598 | 39 | 0.00932187 | 0 |
| 0.0435551 | 1 | 937  | 26 | 0.0231899  | 0 |

|           |          |      |    |            |   |
|-----------|----------|------|----|------------|---|
| 0.077996  | 1        | 671  | 19 | 0.0496901  | 0 |
| 0.0329179 | 0.417288 | 671  | 19 | 0.0496901  | 0 |
| 0.0828868 | 1        | 727  | 19 | 0.0313907  | 0 |
| 0.0739829 | 1        | 631  | 18 | 0.0363782  | 0 |
| 0.0634171 | 1        | 631  | 18 | 0.0363782  | 0 |
| 0.0696284 | 1        | 594  | 15 | 0.0390971  | 0 |
| 0.0981249 | 1        | 853  | 18 | 0.00822726 | 0 |
| 0.0989412 | 1        | 841  | 22 | 0.0219982  | 0 |
| 0.134706  | 1        | 1145 | 27 | 0.0101517  | 0 |
| 0.114824  | 1        | 976  | 20 | 0.0315584  | 0 |
| 0.0914118 | 1        | 777  | 22 | 0.0470154  | 0 |
| 0.0823757 | 1        | 724  | 20 | 0.0496901  | 0 |
| 0.10198   | 1        | 896  | 25 | 0.0108314  | 0 |
| 0.0254482 | 1        | 467  | 13 | 0.0441641  | 0 |
| 0.0196124 | 0.357602 | 467  | 13 | 0.0441641  | 0 |
| 0.113176  | 1        | 962  | 21 | 0.0131795  | 0 |
| 0.0795628 | 1        | 677  | 19 | 0.0176639  | 0 |
| 0.0947221 | 1        | 813  | 22 | 0.0341096  | 0 |
| 0.118505  | 1        | 1008 | 22 | 0.0347451  | 0 |
| 0.0738397 | 1        | 630  | 17 | 0.049902   | 0 |
| 0.0536471 | 1        | 456  | 13 | 0.0475804  | 0 |
| 0.0778823 | 1        | 662  | 18 | 0.04796    | 0 |
| 0.0703529 | 1        | 598  | 17 | 0.0469625  | 0 |
| 0.0574118 | 1        | 488  | 14 | 0.0306845  | 0 |
| 0.108874  | 1        | 930  | 19 | 0.0360075  | 0 |
| 0.0723484 | 1        | 618  | 10 | 0.047704   | 0 |
| 0.10402   | 1        | 885  | 23 | 0.0353366  | 0 |
| 0.0729412 | 1        | 620  | 10 | 0.0398122  | 0 |
| 0.0586309 | 1        | 895  | 25 | 0.0166664  | 0 |
| 0.0845882 | 1        | 719  | 14 | 0.0324588  | 0 |
| 0.0692046 | 1        | 589  | 16 | 0.0430254  | 0 |
| 0.074     | 1        | 629  | 18 | 0.0418866  | 0 |
| 0.105263  | 1        | 898  | 22 | 0.0188909  | 0 |
| 0.0360335 | 1        | 641  | 18 | 0.036493   | 0 |
| 0.0785641 | 1        | 685  | 15 | 0.0464151  | 0 |
| 0.0608862 | 1        | 540  | 12 | 0.0443671  | 0 |
| 0.0755937 | 1        | 643  | 18 | 0.0422044  | 0 |
| 0.057246  | 1        | 777  | 22 | 0.023031   | 0 |
| 0.0785328 | 1        | 668  | 13 | 0.020983   | 0 |
| 0.0696471 | 1        | 592  | 16 | 0.0169842  | 0 |
| 0.0856964 | 1        | 822  | 23 | 0.0358574  | 0 |
| 0.0703053 | 1        | 608  | 15 | 0.025388   | 0 |
| 0.0991963 | 1        | 864  | 23 | 0.0301901  | 0 |
| 0.0717647 | 1        | 610  | 14 | 0.043405   | 0 |
| 0.0821176 | 1        | 698  | 20 | 0.0321322  | 0 |
| 0.120235  | 1        | 1022 | 28 | 0.0212832  | 0 |
| 0.0753129 | 0.940341 | 704  | 20 | 0.0231899  | 0 |

|            |           |      |    |           |   |
|------------|-----------|------|----|-----------|---|
| 0.0828235  | 1         | 704  | 20 | 0.0231899 | 0 |
| 0.0529349  | 1         | 450  | 11 | 0.0431666 | 0 |
| 0.0669333  | 1         | 569  | 16 | 0.0395561 | 0 |
| 0.0732855  | 1         | 623  | 15 | 0.0396003 | 0 |
| 0.0559893  | 1         | 588  | 13 | 0.0499638 | 0 |
| 0.0691765  | 1         | 588  | 17 | 0.0473332 | 0 |
| 0.0780835  | 1         | 735  | 20 | 0.0342508 | 0 |
| 0.0695294  | 1         | 591  | 11 | 0.0358486 | 0 |
| 0.0851765  | 1         | 724  | 21 | 0.0332268 | 0 |
| 0.0749412  | 1         | 637  | 18 | 0.0335269 | 0 |
| 0.0728235  | 1         | 619  | 15 | 0.0457001 | 0 |
| 0.0844706  | 1         | 718  | 20 | 0.0488427 | 0 |
| 0.0446522  | 1         | 597  | 17 | 0.0429636 | 0 |
| 0.0719812  | 1         | 614  | 18 | 0.0497431 | 0 |
| 0.0298256  | 1         | 655  | 18 | 0.0337123 | 0 |
| 0.0291881  | 1         | 641  | 12 | 0.039971  | 0 |
| 0.0288238  | 1         | 633  | 13 | 0.0399004 | 0 |
| 0.0464691  | 1         | 762  | 21 | 0.0284511 | 0 |
| 0.0526961  | 1         | 688  | 18 | 0.044579  | 0 |
| 0.0809412  | 1         | 688  | 18 | 0.044579  | 0 |
| 0.076      | 1         | 646  | 18 | 0.0493547 | 0 |
| 0.0422832  | 1         | 623  | 13 | 0.0404301 | 0 |
| 0.09       | 1         | 765  | 21 | 0.0321499 | 0 |
| 0.00399906 | 0.0519878 | 654  | 18 | 0.0448703 | 0 |
| 0.0685882  | 1         | 583  | 11 | 0.0438816 | 0 |
| 0.0541207  | 1         | 461  | 12 | 0.0446496 | 0 |
| 0.0696173  | 1         | 593  | 13 | 0.0447644 | 0 |
| 0.0761693  | 1         | 684  | 12 | 0.0490104 | 0 |
| 0.094      | 1         | 799  | 21 | 0.0326883 | 0 |
| 0.0483114  | 1         | 412  | 12 | 0.0446055 | 0 |
| 0.0823529  | 1         | 700  | 15 | 0.0147684 | 0 |
| 0.114025   | 1         | 974  | 23 | 0.0246288 | 0 |
| 0.077895   | 1         | 672  | 19 | 0.0234194 | 0 |
| 0.0685645  | 1         | 1067 | 26 | 0.0354249 | 0 |
| 0.072171   | 1         | 618  | 13 | 0.0446496 | 0 |
| 0.114329   | 1         | 979  | 28 | 0.0359898 | 0 |
| 0.133882   | 1         | 1138 | 31 | 0.022519  | 0 |
| 0.0782353  | 1         | 665  | 19 | 0.0448174 | 0 |
| 0.0698824  | 1         | 594  | 17 | 0.0457001 | 0 |
| 0.0545055  | 1         | 620  | 14 | 0.0361487 | 0 |
| 0.0932071  | 1         | 1073 | 30 | 0.0252203 | 0 |
| 0.0627059  | 0.496738  | 1073 | 30 | 0.0252203 | 0 |
| 0.100059   | 1         | 852  | 24 | 0.0316114 | 0 |
| 0.0784706  | 1         | 667  | 17 | 0.0451263 | 0 |
| 0.108566   | 1         | 929  | 26 | 0.0109991 | 0 |
| 0.102118   | 1         | 868  | 22 | 0.0419749 | 0 |
| 0.0895294  | 1         | 761  | 21 | 0.0443936 | 0 |

|           |          |      |    |            |   |
|-----------|----------|------|----|------------|---|
| 0.0711765 | 1        | 605  | 17 | 0.0416218  | 0 |
| 0.0624545 | 1        | 601  | 17 | 0.0405448  | 0 |
| 0.0742353 | 1        | 631  | 18 | 0.0437139  | 0 |
| 0.0739049 | 1        | 631  | 18 | 0.0437139  | 0 |
| 0.0695846 | 1        | 593  | 17 | 0.0436786  | 0 |
| 0.0924706 | 1        | 786  | 20 | 0.0244876  | 0 |
| 0.125412  | 1        | 1066 | 22 | 0.0360869  | 0 |
| 0.0554305 | 1        | 960  | 27 | 0.0188821  | 0 |
| 0.0772596 | 1        | 671  | 12 | 0.0333416  | 0 |
| 0.0407059 | 1        | 346  | 10 | 0.0452499  | 0 |
| 0.0690588 | 1        | 587  | 17 | 0.047598   | 0 |
| 0.114941  | 1        | 977  | 25 | 0.00878339 | 0 |
| 0.0712941 | 1        | 606  | 15 | 0.0400593  | 0 |
| 0.0915294 | 1        | 778  | 22 | 0.0333945  | 0 |
| 0.109793  | 1        | 935  | 26 | 0.0230928  | 0 |
| 0.11      | 1        | 935  | 26 | 0.0230928  | 0 |
| 0.0649412 | 1        | 552  | 16 | 0.02462    | 0 |
| 0.138481  | 1        | 1180 | 33 | 0.0326265  | 0 |
| 0.0763529 | 1        | 649  | 18 | 0.0332621  | 0 |
| 0.0712941 | 1        | 606  | 17 | 0.0427252  | 0 |
| 0.0796636 | 1        | 682  | 19 | 0.0355396  | 0 |
| 0.0723414 | 1        | 617  | 18 | 0.0335799  | 0 |
| 0.0744656 | 1        | 634  | 17 | 0.0492664  | 0 |
| 0.0695764 | 1        | 593  | 17 | 0.0493371  | 0 |
| 0.0401875 | 1        | 626  | 18 | 0.0315672  | 0 |
| 0.116     | 1        | 986  | 27 | 0.0252203  | 0 |
| 0.0711765 | 1        | 605  | 13 | 0.0464151  | 0 |
| 0.0454567 | 1        | 941  | 26 | 0.0476775  | 0 |
| 0.07      | 1        | 595  | 13 | 0.0476863  | 0 |
| 0.0691765 | 1        | 588  | 16 | 0.0396179  | 0 |
| 0.0879593 | 0.916753 | 961  | 27 | 0.0219276  | 0 |
| 0.0484864 | 1        | 583  | 16 | 0.0465652  | 0 |
| 0.0803529 | 1        | 683  | 16 | 0.0411098  | 0 |
| 0.108235  | 1        | 920  | 22 | 0.026562   | 0 |
| 0.0614118 | 1        | 522  | 14 | 0.0225014  | 0 |
| 0.0741176 | 1        | 630  | 18 | 0.0393443  | 0 |
| 0.0816471 | 1        | 694  | 20 | 0.0335711  | 0 |
| 0.0850588 | 1        | 723  | 16 | 0.0274271  | 0 |
| 0.0627929 | 1        | 536  | 15 | 0.0470331  | 0 |
| 0.0629403 | 1        | 536  | 15 | 0.0470331  | 0 |
| 0.0732941 | 1        | 623  | 14 | 0.0252644  | 0 |
| 0.0976471 | 1        | 830  | 20 | 0.0368461  | 0 |
| 0.0764706 | 1        | 650  | 16 | 0.049849   | 0 |
| 0.0741176 | 1        | 630  | 18 | 0.0470154  | 0 |
| 0.0704706 | 1        | 599  | 17 | 0.0496548  | 0 |
| 0.0710784 | 1        | 609  | 17 | 0.0427252  | 0 |
| 0.0350451 | 1        | 591  | 17 | 0.0410568  | 0 |

|           |          |      |    |            |   |
|-----------|----------|------|----|------------|---|
| 0.0727059 | 1        | 618  | 17 | 0.0491517  | 0 |
| 0.101529  | 1        | 863  | 24 | 0.0335093  | 0 |
| 0.042     | 1        | 357  | 10 | 0.0436609  | 0 |
| 0.0959125 | 1        | 833  | 21 | 0.0327678  | 0 |
| 0.0925734 | 1        | 804  | 23 | 0.0166222  | 0 |
| 0.116235  | 1        | 988  | 25 | 0.0300401  | 0 |
| 0.0907703 | 1        | 773  | 21 | 0.0361311  | 0 |
| 0.0724706 | 1        | 616  | 17 | 0.0447026  | 0 |
| 0.0575409 | 1        | 921  | 26 | 0.0246376  | 0 |
| 0.0604706 | 1        | 514  | 12 | 0.0430872  | 0 |
| 0.0738824 | 1        | 628  | 17 | 0.0494443  | 0 |
| 0.0297647 | 0.349931 | 723  | 18 | 0.0490016  | 0 |
| 0.0850588 | 1        | 723  | 18 | 0.0490016  | 0 |
| 0.0608235 | 0.988528 | 523  | 15 | 0.0477922  | 0 |
| 0.0834118 | 1        | 709  | 18 | 0.0440582  | 0 |
| 0.0790588 | 1        | 672  | 19 | 0.0253968  | 0 |
| 0.126283  | 1        | 1095 | 25 | 0.00965731 | 0 |
| 0.0662353 | 1        | 563  | 16 | 0.0450116  | 0 |
| 0.0541763 | 1        | 587  | 11 | 0.0464151  | 0 |
| 0.0721176 | 1        | 613  | 16 | 0.0330767  | 0 |
| 0.118947  | 1        | 1012 | 28 | 0.0489928  | 0 |
| 0.0662205 | 1        | 564  | 16 | 0.0353984  | 0 |
| 0.101647  | 1        | 864  | 24 | 0.0161632  | 0 |
| 0.0357337 | 1        | 593  | 11 | 0.044632   | 0 |
| 0.059819  | 1        | 509  | 15 | 0.0447467  | 0 |
| 0.0813858 | 1        | 693  | 20 | 0.0241786  | 0 |
| 0.0890194 | 1        | 758  | 15 | 0.034242   | 0 |
| 0.0831871 | 1        | 711  | 18 | 0.0304461  | 0 |
| 0.0765882 | 1        | 651  | 13 | 0.0466888  | 0 |
| 0.0863529 | 1        | 734  | 18 | 0.0356191  | 0 |
| 0.104629  | 1        | 895  | 25 | 0.0172402  | 0 |
| 0.135921  | 1        | 1201 | 33 | 0.0188997  | 0 |
| 0.0716471 | 1        | 609  | 16 | 0.0429018  | 0 |
| 0.0793872 | 1        | 684  | 18 | 0.0153246  | 0 |
| 0.105765  | 1        | 899  | 26 | 0.0361487  | 0 |
| 0.0951765 | 1        | 809  | 23 | 0.0194735  | 0 |
| 0.113647  | 1        | 966  | 23 | 0.0231281  | 0 |
| 0.136824  | 1        | 1163 | 31 | 0.0173284  | 0 |
| 0.121875  | 1        | 1048 | 29 | 0.0186437  | 0 |
| 0.0917647 | 1        | 780  | 22 | 0.0183436  | 0 |
| 0.040611  | 1        | 678  | 19 | 0.0359192  | 0 |
| 0.0632871 | 1        | 593  | 11 | 0.0278597  | 0 |
| 0.0692587 | 1        | 611  | 17 | 0.0443142  | 0 |
| 0.07      | 1        | 595  | 12 | 0.0347275  | 0 |
| 0.0769952 | 1        | 657  | 18 | 0.0474126  | 0 |
| 0.100972  | 1        | 862  | 24 | 0.0499815  | 0 |
| 0.134941  | 1        | 1147 | 29 | 0.0252467  | 0 |

|           |          |      |    |           |   |
|-----------|----------|------|----|-----------|---|
| 0.0823529 | 1        | 700  | 20 | 0.0317173 | 0 |
| 0.0949412 | 1        | 807  | 18 | 0.0230575 | 0 |
| 0.0574118 | 1        | 488  | 14 | 0.0489045 | 0 |
| 0.0788235 | 1        | 670  | 17 | 0.0362547 | 0 |
| 0.0527547 | 1        | 451  | 12 | 0.0498844 | 0 |
| 0.054682  | 1        | 466  | 13 | 0.0328472 | 0 |
| 0.0801177 | 1        | 681  | 17 | 0.0449056 | 0 |
| 0.0917647 | 1        | 780  | 20 | 0.0366784 | 0 |
| 0.0533239 | 1        | 454  | 13 | 0.0233929 | 0 |
| 0.0696471 | 1        | 592  | 17 | 0.0463534 | 0 |
| 0.0667103 | 1        | 612  | 13 | 0.0182553 | 0 |
| 0.0827059 | 1        | 703  | 20 | 0.0365195 | 0 |
| 0.091344  | 1        | 802  | 15 | 0.0385763 | 0 |
| 0.080795  | 1        | 687  | 20 | 0.0402977 | 0 |
| 0.0514981 | 1        | 648  | 15 | 0.0440141 | 0 |
| 0.120432  | 1        | 1025 | 22 | 0.0324588 | 0 |
| 0.11576   | 1        | 985  | 25 | 0.03117   | 0 |
| 0.096     | 1        | 816  | 23 | 0.0416218 | 0 |
| 0.0636114 | 1        | 998  | 25 | 0.025388  | 0 |
| 0.124942  | 1        | 1072 | 30 | 0.0167017 | 0 |
| 0.035018  | 1        | 1119 | 30 | 0.0136915 | 0 |
| 0.131015  | 1        | 1119 | 30 | 0.0136915 | 0 |
| 0.0741913 | 1        | 633  | 16 | 0.0444731 | 0 |
| 0.0885181 | 1        | 764  | 22 | 0.0301284 | 0 |
| 0.0903643 | 1        | 769  | 15 | 0.0349129 | 0 |
| 0.0476409 | 0.540962 | 769  | 15 | 0.0349129 | 0 |
| 0.0411721 | 1        | 607  | 17 | 0.0457619 | 0 |
| 0.0776222 | 1        | 726  | 19 | 0.0487015 | 0 |
| 0.0768781 | 1        | 658  | 19 | 0.0491517 | 0 |
| 0.0684659 | 1        | 586  | 15 | 0.047907  | 0 |
| 0.0710588 | 1        | 604  | 13 | 0.0496195 | 0 |
| 0.0549412 | 1        | 467  | 13 | 0.0250172 | 0 |
| 0.0894118 | 1        | 760  | 16 | 0.0171254 | 0 |
| 0.0865882 | 1        | 736  | 18 | 0.0198619 | 0 |
| 0.066     | 1        | 561  | 16 | 0.0393884 | 0 |
| 0.113717  | 1        | 994  | 21 | 0.0314701 | 0 |
| 0.114941  | 1        | 977  | 23 | 0.0110785 | 0 |
| 0.172235  | 1        | 1464 | 41 | 0.0182288 | 0 |
| 0.101294  | 1        | 861  | 19 | 0.0164545 | 0 |
| 0.0442353 | 1        | 376  | 11 | 0.0462298 | 0 |
| 0.0997538 | 1        | 851  | 23 | 0.0333504 | 0 |
| 0.0710087 | 1        | 604  | 17 | 0.0349835 | 0 |
| 0.0701176 | 1        | 596  | 12 | 0.0416218 | 0 |
| 0.05      | 1        | 425  | 12 | 0.049443  | 0 |
| 0.0776471 | 1        | 660  | 12 | 0.035469  | 0 |
| 0.0969412 | 1        | 824  | 17 | 0.035469  | 0 |
| 0.0608235 | 1        | 517  | 13 | 0.0487456 | 0 |



|           |          |      |    |           |   |
|-----------|----------|------|----|-----------|---|
| 0.108123  | 1        | 981  | 28 | 0.0234812 | 0 |
| 0.0747278 | 1        | 851  | 23 | 0.0467241 | 0 |
| 0.0629412 | 1        | 535  | 15 | 0.0449321 | 0 |
| 0.0693972 | 1        | 1164 | 33 | 0.0048728 | 0 |
| 0.049368  | 1        | 664  | 13 | 0.0467682 | 0 |
| 0.07012   | 1        | 754  | 21 | 0.0341007 | 0 |
| 0.109059  | 1        | 927  | 24 | 0.0246465 | 0 |
| 0.0564912 | 1        | 530  | 15 | 0.0488604 | 0 |
| 0.0743529 | 1        | 632  | 17 | 0.0483572 | 0 |
| 0.0729412 | 1        | 620  | 14 | 0.0342949 | 0 |
| 0.0711944 | 1        | 608  | 12 | 0.0474126 | 0 |
| 0.0793278 | 1        | 675  | 15 | 0.0339065 | 0 |
| 0.0810112 | 1        | 689  | 19 | 0.0319115 | 0 |
| 0.0776553 | 1        | 775  | 20 | 0.0319821 | 0 |
| 0.0633267 | 1        | 632  | 18 | 0.0451263 | 0 |
| 0.0784706 | 1        | 667  | 18 | 0.0423898 | 0 |
| 0.0683529 | 1        | 581  | 13 | 0.0482601 | 0 |
| 0.104235  | 1        | 886  | 24 | 0.035981  | 0 |
| 0.113171  | 1        | 1880 | 52 | 0.0159337 | 0 |
| 0.0367204 | 1        | 610  | 17 | 0.0441641 | 0 |
| 0.0864279 | 1        | 917  | 25 | 0.0328472 | 0 |
| 0.0756471 | 1        | 643  | 18 | 0.0376935 | 0 |
| 0.0630044 | 1        | 968  | 22 | 0.030967  | 0 |
| 0.0639433 | 1        | 911  | 20 | 0.0383115 | 0 |
| 0.0815294 | 1        | 693  | 15 | 0.0236136 | 0 |
| 0.0718401 | 1        | 611  | 17 | 0.0469978 | 0 |
| 0.0643529 | 1        | 547  | 15 | 0.0487368 | 0 |
| 0.0821176 | 1        | 698  | 20 | 0.031479  | 0 |
| 0.0589412 | 1        | 501  | 11 | 0.044835  | 0 |
| 0.0710588 | 0.985318 | 613  | 13 | 0.0426193 | 0 |
| 0.102471  | 1        | 871  | 24 | 0.036696  | 0 |
| 0.0812588 | 1        | 692  | 15 | 0.0377906 | 0 |
| 0.0696124 | 1        | 616  | 15 | 0.037058  | 0 |
| 0.110446  | 1        | 941  | 27 | 0.0237019 | 0 |
| 0.08      | 1        | 680  | 15 | 0.0160308 | 0 |
| 0.0692651 | 1        | 590  | 17 | 0.0420543 | 0 |
| 0.0709753 | 1        | 604  | 17 | 0.0169135 | 0 |
| 0.0880141 | 1        | 749  | 21 | 0.0348422 | 0 |
| 0.101497  | 1        | 902  | 24 | 0.0288219 | 0 |
| 0.0703435 | 1        | 639  | 13 | 0.0205328 | 0 |
| 0.0899693 | 1        | 879  | 19 | 0.0455942 | 0 |
| 0.105732  | 1        | 1033 | 29 | 0.0228103 | 0 |
| 0.0959097 | 1        | 816  | 22 | 0.0249731 | 0 |
| 0.105313  | 1        | 896  | 25 | 0.0241874 | 0 |
| 0.0578824 | 1        | 492  | 12 | 0.042328  | 0 |
| 0.072625  | 1        | 620  | 17 | 0.0244787 | 0 |
| 0.0703529 | 1        | 598  | 17 | 0.0325294 | 0 |

|           |   |      |    |            |   |
|-----------|---|------|----|------------|---|
| 0.0635294 | 1 | 540  | 10 | 0.0451263  | 0 |
| 0.0498824 | 1 | 424  | 12 | 0.0449586  | 0 |
| 0.0691315 | 1 | 589  | 14 | 0.0464946  | 0 |
| 0.0584744 | 1 | 660  | 19 | 0.0362635  | 0 |
| 0.0674118 | 1 | 573  | 14 | 0.04796    | 0 |
| 0.0690588 | 1 | 587  | 17 | 0.0478982  | 0 |
| 0.0857579 | 1 | 731  | 15 | 0.0212037  | 0 |
| 0.0814118 | 1 | 692  | 19 | 0.0430342  | 0 |
| 0.0707059 | 1 | 601  | 17 | 0.0333239  | 0 |
| 0.0808235 | 1 | 687  | 19 | 0.032653   | 0 |
| 0.0746129 | 1 | 636  | 17 | 0.0369697  | 0 |
| 0.0486861 | 1 | 415  | 11 | 0.0444554  | 0 |
| 0.0734118 | 1 | 624  | 12 | 0.0380908  | 0 |
| 0.0954859 | 1 | 844  | 20 | 0.0348158  | 0 |
| 0.0898824 | 1 | 764  | 21 | 0.0368373  | 0 |
| 0.0910588 | 1 | 774  | 22 | 0.0150951  | 0 |
| 0.113765  | 1 | 967  | 23 | 0.0107166  | 0 |
| 0.0701176 | 1 | 596  | 17 | 0.0485867  | 0 |
| 0.0974118 | 1 | 828  | 20 | 0.0203298  | 0 |
| 0.0441908 | 1 | 604  | 17 | 0.048216   | 0 |
| 0.0821613 | 1 | 701  | 18 | 0.0300401  | 0 |
| 0.126271  | 1 | 1080 | 22 | 0.0225985  | 0 |
| 0.0714452 | 1 | 612  | 10 | 0.0255998  | 0 |
| 0.0734245 | 1 | 628  | 14 | 0.0480217  | 0 |
| 0.0747059 | 1 | 635  | 16 | 0.0288219  | 0 |
| 0.0743821 | 1 | 635  | 16 | 0.0288219  | 0 |
| 0.074     | 1 | 629  | 14 | 0.0436168  | 0 |
| 0.0825688 | 1 | 702  | 15 | 0.0498049  | 0 |
| 0.0825882 | 1 | 702  | 20 | 0.0319468  | 0 |
| 0.0765882 | 1 | 651  | 18 | 0.0325294  | 0 |
| 0.0700615 | 1 | 604  | 17 | 0.0499285  | 0 |
| 0.128588  | 1 | 1093 | 26 | 0.00914532 | 0 |
| 0.0706076 | 1 | 602  | 17 | 0.048878   | 0 |
| 0.0761112 | 1 | 649  | 16 | 0.0495842  | 0 |
| 0.0978824 | 1 | 832  | 23 | 0.040589   | 0 |
| 0.0884706 | 1 | 752  | 21 | 0.0298017  | 0 |
| 0.0805882 | 1 | 685  | 12 | 0.032706   | 0 |
| 0.110824  | 1 | 942  | 26 | 0.0354249  | 0 |
| 0.0739136 | 1 | 631  | 18 | 0.0295722  | 0 |
| 0.0796201 | 1 | 679  | 19 | 0.0252203  | 0 |
| 0.101629  | 1 | 867  | 24 | 0.0252026  | 0 |
| 0.0755294 | 1 | 642  | 16 | 0.0441641  | 0 |
| 0.0760373 | 1 | 766  | 19 | 0.0173196  | 0 |
| 0.091313  | 1 | 781  | 19 | 0.0334828  | 0 |
| 0.0736471 | 1 | 626  | 17 | 0.045144   | 0 |
| 0.0909412 | 1 | 773  | 21 | 0.0454     | 0 |
| 0.0472189 | 1 | 781  | 18 | 0.0107431  | 0 |

|           |          |      |    |            |   |
|-----------|----------|------|----|------------|---|
| 0.105424  | 1        | 898  | 19 | 0.0204093  | 0 |
| 0.105251  | 1        | 898  | 19 | 0.0204093  | 0 |
| 0.0733326 | 1        | 630  | 11 | 0.0215039  | 0 |
| 0.0464706 | 1        | 395  | 11 | 0.0466888  | 0 |
| 0.107106  | 1        | 924  | 23 | 0.0249731  | 0 |
| 0.0684706 | 1        | 582  | 16 | 0.0401299  | 0 |
| 0.0815561 | 1        | 696  | 16 | 0.0330503  | 0 |
| 0.0623667 | 1        | 585  | 11 | 0.0475892  | 0 |
| 0.109181  | 1        | 930  | 26 | 0.0107166  | 0 |
| 0.100352  | 1        | 855  | 22 | 0.0241963  | 0 |
| 0.0861711 | 1        | 830  | 19 | 0.0255734  | 0 |
| 0.0469186 | 1        | 606  | 16 | 0.0479953  | 0 |
| 0.0487132 | 1        | 600  | 17 | 0.0258823  | 0 |
| 0.0918798 | 1        | 783  | 18 | 0.0227662  | 0 |
| 0.0696158 | 1        | 598  | 15 | 0.0484984  | 0 |
| 0.0488691 | 1        | 646  | 17 | 0.0405007  | 0 |
| 0.0888235 | 1        | 755  | 21 | 0.0180964  | 0 |
| 0.130588  | 1        | 1110 | 31 | 0.0107519  | 0 |
| 0.105647  | 1        | 898  | 26 | 0.0361487  | 0 |
| 0.039547  | 1        | 660  | 18 | 0.04796    | 0 |
| 0.131176  | 1        | 1115 | 21 | 0.0231281  | 0 |
| 0.11962   | 1        | 1020 | 28 | 0.0343479  | 0 |
| 0.12      | 1        | 1020 | 28 | 0.0343479  | 0 |
| 0.148588  | 1        | 1263 | 35 | 0.00842146 | 0 |
| 0.0738922 | 1        | 632  | 16 | 0.0427782  | 0 |
| 0.0743529 | 1        | 632  | 16 | 0.0427782  | 0 |
| 0.0923652 | 1        | 790  | 16 | 0.0490987  | 0 |
| 0.0665094 | 1        | 592  | 17 | 0.044888   | 0 |
| 0.092     | 1        | 782  | 21 | 0.0239579  | 0 |
| 0.11462   | 1        | 980  | 27 | 0.0451175  | 0 |
| 0.0631579 | 1        | 540  | 13 | 0.0345686  | 0 |
| 0.0983529 | 1        | 836  | 22 | 0.0337918  | 0 |
| 0.0994118 | 1        | 845  | 24 | 0.0153422  | 0 |
| 0.0701176 | 1        | 596  | 16 | 0.0444554  | 0 |
| 0.117294  | 1        | 997  | 25 | 0.0220865  | 0 |
| 0.0633098 | 1        | 645  | 16 | 0.0489928  | 0 |
| 0.0738824 | 1        | 628  | 17 | 0.0253438  | 0 |
| 0.0694118 | 1        | 590  | 13 | 0.0404124  | 0 |
| 0.0956797 | 1        | 815  | 16 | 0.0217952  | 0 |
| 0.0718824 | 1        | 611  | 17 | 0.0493282  | 0 |
| 0.0698824 | 0.983444 | 604  | 14 | 0.0421161  | 0 |
| 0.109412  | 1        | 930  | 26 | 0.014486   | 0 |
| 0.109245  | 1        | 930  | 26 | 0.014486   | 0 |
| 0.106702  | 0.997824 | 919  | 24 | 0.0245758  | 0 |
| 0.104564  | 1        | 944  | 22 | 0.00727388 | 0 |
| 0.124353  | 1        | 1057 | 25 | 0.0184231  | 0 |
| 0.0821176 | 1        | 698  | 16 | 0.0318497  | 0 |

|           |          |      |    |            |   |
|-----------|----------|------|----|------------|---|
| 0.0945882 | 1        | 804  | 22 | 0.0483484  | 0 |
| 0.0764436 | 1        | 650  | 13 | 0.0498049  | 0 |
| 0.0503401 | 1        | 629  | 17 | 0.0484543  | 0 |
| 0.0776438 | 1        | 663  | 19 | 0.0339418  | 0 |
| 0.102321  | 1        | 908  | 22 | 0.0154747  | 0 |
| 0.0785882 | 1        | 668  | 15 | 0.0358839  | 0 |
| 0.139529  | 1        | 1186 | 31 | 0.0176551  | 0 |
| 0.0885532 | 1        | 762  | 22 | 0.017046   | 0 |
| 0.0264364 | 0.295276 | 762  | 22 | 0.017046   | 0 |
| 0.0776471 | 1        | 660  | 17 | 0.048622   | 0 |
| 0.0765882 | 1        | 651  | 17 | 0.0435285  | 0 |
| 0.0805882 | 1        | 685  | 19 | 0.0361311  | 0 |
| 0.0588803 | 1        | 549  | 16 | 0.0488251  | 0 |
| 0.0847059 | 1        | 720  | 20 | 0.0154217  | 0 |
| 0.0449791 | 1        | 688  | 19 | 0.0361487  | 0 |
| 0.0854118 | 1        | 726  | 20 | 0.0365018  | 0 |
| 0.124941  | 1        | 1062 | 30 | 0.0176992  | 0 |
| 0.137765  | 1        | 1171 | 33 | 0.0135679  | 0 |
| 0.0703529 | 1        | 598  | 17 | 0.0444289  | 0 |
| 0.0814118 | 1        | 692  | 19 | 0.0354249  | 0 |
| 0.126     | 1        | 1071 | 30 | 0.0184672  | 0 |
| 0.0696471 | 1        | 592  | 16 | 0.0467329  | 0 |
| 0.063286  | 1        | 624  | 18 | 0.0482778  | 0 |
| 0.110118  | 1        | 936  | 23 | 0.0169135  | 0 |
| 0.0730588 | 1        | 621  | 18 | 0.0499638  | 0 |
| 0.0883529 | 1        | 751  | 21 | 0.0383291  | 0 |
| 0.0441234 | 1        | 895  | 20 | 0.0191293  | 0 |
| 0.0278052 | 1        | 564  | 16 | 0.0486397  | 0 |
| 0.0770588 | 1        | 655  | 11 | 0.0186614  | 0 |
| 0.0744706 | 1        | 633  | 17 | 0.0303402  | 0 |
| 0.114471  | 1        | 973  | 27 | 0.0326795  | 0 |
| 0.0800141 | 1        | 681  | 14 | 0.0383115  | 0 |
| 0.0715294 | 1        | 608  | 17 | 0.0481807  | 0 |
| 0.0702353 | 1        | 597  | 17 | 0.0418866  | 0 |
| 0.122575  | 1        | 1049 | 30 | 0.00999276 | 0 |
| 0.111475  | 1        | 954  | 27 | 0.034904   | 0 |
| 0.0835294 | 1        | 710  | 20 | 0.025282   | 0 |
| 0.0779633 | 1        | 663  | 14 | 0.0341184  | 0 |
| 0.111595  | 1        | 949  | 19 | 0.0186614  | 0 |
| 0.0713952 | 1        | 612  | 14 | 0.041869   | 0 |
| 0.0694036 | 1        | 590  | 16 | 0.0448438  | 0 |
| 0.0604896 | 1        | 803  | 20 | 0.0348511  | 0 |
| 0.0731736 | 1        | 629  | 16 | 0.0382497  | 0 |
| 0.0782599 | 1        | 671  | 19 | 0.0244081  | 0 |
| 0.0964706 | 1        | 820  | 22 | 0.0364489  | 0 |
| 0.077877  | 1        | 741  | 21 | 0.0336152  | 0 |
| 0.0930588 | 1        | 791  | 19 | 0.0301019  | 0 |

|           |          |      |    |           |   |
|-----------|----------|------|----|-----------|---|
| 0.0798824 | 1        | 679  | 19 | 0.0181141 | 0 |
| 0.0782353 | 1        | 665  | 19 | 0.0475009 | 0 |
| 0.0676471 | 0.991379 | 580  | 10 | 0.0495754 | 0 |
| 0.118221  | 1        | 1005 | 28 | 0.0317703 | 0 |
| 0.0776126 | 1        | 1013 | 28 | 0.0363429 | 0 |
| 0.119176  | 1        | 1013 | 28 | 0.0363429 | 0 |
| 0.082816  | 1        | 707  | 15 | 0.0246465 | 0 |
| 0.0757647 | 1        | 644  | 18 | 0.0480659 | 0 |
| 0.0502868 | 1        | 868  | 20 | 0.0324588 | 0 |
| 0.0581248 | 1        | 597  | 17 | 0.0489222 | 0 |
| 0.0948235 | 1        | 806  | 23 | 0.02462   | 0 |
| 0.0737375 | 1        | 714  | 20 | 0.0461944 | 0 |
| 0.0585534 | 1        | 714  | 20 | 0.0461944 | 0 |
| 0.0792941 | 1        | 674  | 17 | 0.0493282 | 0 |
| 0.043452  | 1        | 719  | 18 | 0.0475539 | 0 |
| 0.127541  | 1        | 1142 | 33 | 0.0354513 | 0 |
| 0.134353  | 1        | 1142 | 33 | 0.0354513 | 0 |
| 0.0686022 | 1        | 586  | 16 | 0.0432549 | 0 |
| 0.0997647 | 1        | 848  | 24 | 0.0359192 | 0 |
| 0.0708235 | 1        | 602  | 12 | 0.048216  | 0 |
| 0.0531046 | 1        | 585  | 17 | 0.0492488 | 0 |
| 0.0424115 | 1        | 605  | 16 | 0.0422309 | 0 |
| 0.0705882 | 1        | 600  | 15 | 0.0444996 | 0 |
| 0.0706929 | 1        | 604  | 17 | 0.0426281 | 0 |
| 0.125878  | 1        | 1075 | 26 | 0.0239226 | 0 |
| 0.041896  | 1        | 822  | 23 | 0.0187585 | 0 |
| 0.101176  | 1        | 860  | 22 | 0.0491517 | 0 |
| 0.105529  | 1        | 897  | 24 | 0.0249643 | 0 |
| 0.072235  | 1        | 627  | 18 | 0.0445614 | 0 |
| 0.0304644 | 1        | 698  | 19 | 0.0242934 | 0 |
| 0.0208787 | 1        | 662  | 19 | 0.0392207 | 0 |
| 0.0716471 | 1        | 609  | 15 | 0.0351424 | 0 |
| 0.0830304 | 1        | 708  | 14 | 0.0269063 | 0 |
| 0.0530811 | 1        | 665  | 19 | 0.0319027 | 0 |
| 0.0779541 | 1        | 663  | 18 | 0.0454353 | 0 |
| 0.0693383 | 1        | 590  | 17 | 0.042893  | 0 |
| 0.0838824 | 1        | 713  | 20 | 0.0221218 | 0 |
| 0.0637158 | 1        | 678  | 19 | 0.0313642 | 0 |
| 0.12701   | 1        | 1082 | 30 | 0.0324147 | 0 |
| 0.0505443 | 1        | 599  | 17 | 0.0496813 | 0 |
| 0.0763081 | 1        | 649  | 14 | 0.0426634 | 0 |
| 0.132824  | 1        | 1129 | 32 | 0.0367578 | 0 |
| 0.0747795 | 1        | 636  | 18 | 0.02989   | 0 |
| 0.0723908 | 1        | 618  | 17 | 0.0341096 | 0 |
| 0.0629431 | 1        | 657  | 17 | 0.04668   | 0 |
| 0.0918824 | 1        | 781  | 22 | 0.0377112 | 0 |
| 0.0955624 | 1        | 870  | 24 | 0.0252026 | 0 |

|            |           |      |    |           |   |
|------------|-----------|------|----|-----------|---|
| 0.0918824  | 1         | 781  | 22 | 0.0173814 | 0 |
| 0.0694118  | 1         | 590  | 16 | 0.0450734 | 0 |
| 0.0608235  | 1         | 517  | 15 | 0.0423457 | 0 |
| 0.0872941  | 1         | 742  | 20 | 0.0357603 | 0 |
| 0.0947059  | 1         | 805  | 15 | 0.0467418 | 0 |
| 0.0952941  | 1         | 810  | 20 | 0.0126322 | 0 |
| 0.0729412  | 1         | 620  | 18 | 0.0470596 | 0 |
| 0.0356376  | 1         | 780  | 21 | 0.0343126 | 0 |
| 0.0239654  | 0.262821  | 780  | 21 | 0.0343126 | 0 |
| 0.0734516  | 1         | 625  | 16 | 0.0442083 | 0 |
| 0.0708235  | 1         | 602  | 10 | 0.0242227 | 0 |
| 0.123412   | 1         | 1049 | 27 | 0.0107608 | 0 |
| 0.0251258  | 1         | 619  | 18 | 0.0437757 | 0 |
| 0.0723745  | 1         | 623  | 18 | 0.0380643 | 0 |
| 0.0363289  | 1         | 895  | 22 | 0.0416306 | 0 |
| 0.0328991  | 1         | 596  | 17 | 0.0434314 | 0 |
| 0.0019225  | 0.0536913 | 596  | 17 | 0.0434314 | 0 |
| 0.113176   | 1         | 962  | 21 | 0.0236136 | 0 |
| 0.100256   | 1         | 860  | 24 | 0.0348246 | 0 |
| 0.083557   | 1         | 716  | 20 | 0.0348334 | 0 |
| 0.122185   | 1         | 1047 | 23 | 0.039309  | 0 |
| 0.138377   | 1         | 1178 | 28 | 0.0121643 | 0 |
| 0.0722353  | 1         | 614  | 16 | 0.0444378 | 0 |
| 0.00604933 | 0.0554963 | 937  | 26 | 0.0314525 | 0 |
| 0.110235   | 1         | 937  | 26 | 0.0314525 | 0 |
| 0.0924706  | 1         | 786  | 20 | 0.0467418 | 0 |
| 0.0769411  | 1         | 655  | 14 | 0.0290073 | 0 |
| 0.0891378  | 1         | 764  | 16 | 0.0342949 | 0 |
| 0.0542788  | 1         | 803  | 16 | 0.0360516 | 0 |
| 0.0944706  | 1         | 803  | 16 | 0.0360516 | 0 |
| 0.0622353  | 1         | 529  | 15 | 0.0185643 | 0 |
| 0.0651765  | 1         | 554  | 14 | 0.0496284 | 0 |
| 0.0827059  | 1         | 703  | 15 | 0.0317261 | 0 |
| 0.0647726  | 1         | 782  | 22 | 0.0444554 | 0 |
| 0.0721176  | 1         | 613  | 11 | 0.041507  | 0 |
| 0.0917647  | 1         | 780  | 20 | 0.044632  | 0 |
| 0.0357683  | 1         | 591  | 17 | 0.0443054 | 0 |
| 0.0684675  | 1         | 659  | 17 | 0.0233576 | 0 |
| 0.0695294  | 1         | 591  | 16 | 0.0475627 | 0 |
| 0.0941176  | 1         | 800  | 14 | 0.0453558 | 0 |
| 0.107176   | 1         | 911  | 21 | 0.0287071 | 0 |
| 0.0701176  | 1         | 596  | 17 | 0.0485426 | 0 |
| 0.089554   | 1         | 763  | 19 | 0.0496548 | 0 |
| 0.0694722  | 1         | 591  | 17 | 0.0465476 | 0 |
| 0.107377   | 1         | 917  | 25 | 0.0234459 | 0 |
| 0.103412   | 1         | 879  | 24 | 0.0219982 | 0 |
| 0.0745882  | 1         | 634  | 16 | 0.0314878 | 0 |

|           |   |      |    |           |   |
|-----------|---|------|----|-----------|---|
| 0.0696908 | 1 | 613  | 15 | 0.0420808 | 0 |
| 0.100045  | 1 | 880  | 23 | 0.0314172 | 0 |
| 0.0249232 | 1 | 430  | 12 | 0.0335623 | 0 |
| 0.0362256 | 1 | 625  | 16 | 0.0443142 | 0 |
| 0.0352669 | 1 | 594  | 10 | 0.0451263 | 0 |
| 0.0764706 | 1 | 650  | 17 | 0.0485337 | 0 |
| 0.0935294 | 1 | 795  | 22 | 0.0348334 | 0 |
| 0.0482353 | 1 | 410  | 12 | 0.0419484 | 0 |
| 0.0866189 | 1 | 859  | 25 | 0.0244787 | 0 |
| 0.0713782 | 1 | 607  | 17 | 0.0462298 | 0 |
| 0.0980277 | 1 | 835  | 18 | 0.0313642 | 0 |
| 0.0847716 | 1 | 722  | 20 | 0.0390088 | 0 |
| 0.039006  | 1 | 653  | 19 | 0.0404301 | 0 |
| 0.0380503 | 1 | 637  | 18 | 0.0218393 | 0 |
| 0.0757966 | 1 | 647  | 16 | 0.0450557 | 0 |
| 0.0752109 | 1 | 642  | 18 | 0.045656  | 0 |
| 0.0952437 | 1 | 811  | 21 | 0.0468124 | 0 |
| 0.0452143 | 1 | 385  | 11 | 0.0365107 | 0 |
| 0.09      | 1 | 765  | 21 | 0.0330679 | 0 |
| 0.0510726 | 1 | 569  | 16 | 0.0476333 | 0 |
| 0.062396  | 1 | 675  | 19 | 0.0383556 | 0 |
| 0.0984608 | 1 | 838  | 24 | 0.0238343 | 0 |
| 0.126036  | 1 | 1080 | 29 | 0.0174608 | 0 |
| 0.0700853 | 1 | 600  | 17 | 0.0490369 | 0 |
| 0.0830588 | 1 | 706  | 20 | 0.0439169 | 0 |
| 0.0778823 | 1 | 662  | 18 | 0.0112551 | 0 |
| 0.0808634 | 1 | 723  | 16 | 0.0367137 | 0 |
| 0.0877647 | 1 | 746  | 21 | 0.0273212 | 0 |
| 0.0732941 | 1 | 623  | 11 | 0.0337212 | 0 |
| 0.0731765 | 1 | 622  | 17 | 0.0274713 | 0 |
| 0.0857647 | 1 | 729  | 21 | 0.035469  | 0 |
| 0.120588  | 1 | 1025 | 29 | 0.0254233 | 0 |
| 0.120588  | 1 | 1025 | 29 | 0.0254233 | 0 |
| 0.105529  | 1 | 897  | 22 | 0.0118642 | 0 |
| 0.0792941 | 1 | 674  | 12 | 0.033421  | 0 |
| 0.0767059 | 1 | 652  | 19 | 0.0444643 | 0 |
| 0.0922951 | 1 | 787  | 22 | 0.0238343 | 0 |
| 0.0880732 | 1 | 751  | 21 | 0.0352571 | 0 |
| 0.0822353 | 1 | 699  | 20 | 0.034904  | 0 |
| 0.0507023 | 1 | 592  | 10 | 0.0302343 | 0 |
| 0.171445  | 1 | 1459 | 37 | 0.0214862 | 0 |
| 0.0444706 | 1 | 378  | 11 | 0.0450822 | 0 |
| 0.129059  | 1 | 1097 | 29 | 0.0248054 | 0 |
| 0.0717647 | 1 | 610  | 17 | 0.0469801 | 0 |
| 0.138235  | 1 | 1175 | 25 | 0.0230222 | 0 |
| 0.100524  | 1 | 864  | 24 | 0.0331739 | 0 |
| 0.0743908 | 1 | 635  | 18 | 0.0414452 | 0 |

|            |          |      |    |           |   |
|------------|----------|------|----|-----------|---|
| 0.0763529  | 1        | 649  | 18 | 0.0497431 | 0 |
| 0.0799955  | 1        | 713  | 20 | 0.0359898 | 0 |
| 0.0712614  | 1        | 609  | 15 | 0.0497078 | 0 |
| 0.0282663  | 1        | 667  | 19 | 0.0466005 | 0 |
| 0.0825021  | 1        | 703  | 20 | 0.0492311 | 0 |
| 0.0681038  | 1        | 635  | 12 | 0.0409774 | 0 |
| 0.0708235  | 1        | 602  | 12 | 0.0464328 | 0 |
| 0.124738   | 1        | 1073 | 23 | 0.0186614 | 0 |
| 0.108471   | 1        | 922  | 18 | 0.0186614 | 0 |
| 0.122006   | 1        | 1039 | 21 | 0.018273  | 0 |
| 0.0278824  | 0.390445 | 607  | 10 | 0.0451793 | 0 |
| 0.00672519 | 0.15807  | 601  | 14 | 0.0489486 | 0 |
| 0.0465516  | 1        | 596  | 17 | 0.0471655 | 0 |
| 0.0674361  | 1        | 596  | 17 | 0.0471655 | 0 |
| 0.0744706  | 1        | 633  | 14 | 0.025132  | 0 |
| 0.0684884  | 1        | 594  | 13 | 0.0485161 | 0 |
| 0.08015    | 1        | 684  | 19 | 0.033624  | 0 |
| 0.0758519  | 1        | 670  | 15 | 0.0431666 | 0 |
| 0.0402306  | 1        | 342  | 10 | 0.0464769 | 0 |
| 0.0718824  | 1        | 611  | 17 | 0.0493017 | 0 |
| 0.0470272  | 1        | 821  | 23 | 0.0201532 | 0 |
| 0.0964521  | 1        | 821  | 23 | 0.0201532 | 0 |
| 0.122576   | 1        | 1043 | 27 | 0.025079  | 0 |
| 0.0507145  | 1        | 433  | 12 | 0.049902  | 0 |
| 0.0710588  | 1        | 604  | 15 | 0.036696  | 0 |
| 0.0750588  | 1        | 638  | 18 | 0.0447556 | 0 |
| 0.08       | 1        | 680  | 19 | 0.0359369 | 0 |
| 0.0927059  | 1        | 788  | 22 | 0.0333504 | 0 |
| 0.0960386  | 1        | 817  | 23 | 0.0234459 | 0 |
| 0.0823239  | 1        | 700  | 20 | 0.0451616 | 0 |
| 0.0903104  | 1        | 768  | 17 | 0.0364489 | 0 |
| 0.106471   | 1        | 905  | 23 | 0.0226426 | 0 |
| 0.0725882  | 1        | 617  | 14 | 0.0493282 | 0 |
| 0.119647   | 1        | 1017 | 23 | 0.0182465 | 0 |
| 0.0761176  | 1        | 647  | 13 | 0.0466888 | 0 |
| 0.0308571  | 1        | 508  | 14 | 0.0335269 | 0 |
| 0.0781266  | 1        | 779  | 22 | 0.0348511 | 0 |
| 0.0711346  | 1        | 605  | 16 | 0.0475186 | 0 |
| 0.0365831  | 1        | 582  | 17 | 0.0462298 | 0 |
| 0.0608473  | 1        | 619  | 14 | 0.0483572 | 0 |
| 0.0852941  | 1        | 725  | 21 | 0.0459914 | 0 |
| 0.0718779  | 1        | 617  | 17 | 0.0495401 | 0 |
| 0.0683641  | 1        | 588  | 14 | 0.047139  | 0 |
| 0.0856471  | 1        | 728  | 21 | 0.0487368 | 0 |
| 0.0685882  | 1        | 583  | 13 | 0.0480835 | 0 |
| 0.0981176  | 1        | 834  | 23 | 0.0455942 | 0 |
| 0.121009   | 1        | 1031 | 29 | 0.0264384 | 0 |



|           |         |      |    |            |   |
|-----------|---------|------|----|------------|---|
| 0.0725882 | 1       | 617  | 18 | 0.0380202  | 0 |
| 0.103059  | 1       | 876  | 23 | 0.0407214  | 0 |
| 0.0699608 | 1       | 606  | 11 | 0.0496548  | 0 |
| 0.0868728 | 1       | 767  | 21 | 0.0253438  | 0 |
| 0.0631702 | 1       | 542  | 16 | 0.0482601  | 0 |
| 0.0751229 | 1       | 642  | 18 | 0.0438198  | 0 |
| 0.0583529 | 1       | 496  | 14 | 0.0249113  | 0 |
| 0.123412  | 1       | 1049 | 29 | 0.0173549  | 0 |
| 0.0778142 | 1       | 665  | 18 | 0.0273388  | 0 |
| 0.071395  | 1       | 607  | 11 | 0.0325471  | 0 |
| 0.135294  | 1       | 1150 | 30 | 0.0156424  | 0 |
| 0.0983529 | 1       | 836  | 24 | 0.0103017  | 0 |
| 0.0411883 | 1       | 617  | 18 | 0.0244876  | 0 |
| 0.0725882 | 1       | 617  | 18 | 0.0244876  | 0 |
| 0.0324048 | 1       | 919  | 26 | 0.0331739  | 0 |
| 0.0395275 | 1       | 1121 | 26 | 0.0237372  | 0 |
| 0.0220733 | 1       | 626  | 17 | 0.0236313  | 0 |
| 0.0159732 | 1       | 453  | 13 | 0.0212037  | 0 |
| 0.134235  | 1       | 1141 | 31 | 0.0240727  | 0 |
| 0.0877316 | 1       | 748  | 21 | 0.0341537  | 0 |
| 0.0712528 | 1       | 608  | 17 | 0.0466888  | 0 |
| 0.0689412 | 1       | 586  | 11 | 0.0398122  | 0 |
| 0.0823529 | 1       | 700  | 20 | 0.0463798  | 0 |
| 0.0300954 | 1       | 426  | 12 | 0.0353719  | 0 |
| 0.0627934 | 1       | 535  | 15 | 0.0487191  | 0 |
| 0.0781542 | 1       | 669  | 19 | 0.0230928  | 0 |
| 0.0229412 | 0.29148 | 669  | 19 | 0.0230928  | 0 |
| 0.0431015 | 1       | 587  | 13 | 0.0424516  | 0 |
| 0.131103  | 1       | 1117 | 29 | 0.00986035 | 0 |
| 0.0818342 | 1       | 696  | 20 | 0.0488692  | 0 |
| 0.0792941 | 1       | 674  | 18 | 0.0342949  | 0 |
| 0.0830588 | 1       | 706  | 19 | 0.0447644  | 0 |
| 0.100941  | 1       | 858  | 21 | 0.024364   | 0 |
| 0.0852911 | 1       | 737  | 15 | 0.042072   | 0 |
| 0.0924597 | 1       | 786  | 22 | 0.0331562  | 0 |
| 0.0700106 | 1       | 596  | 17 | 0.0445084  | 0 |
| 0.0450922 | 1       | 990  | 25 | 0.0267121  | 0 |
| 0.085343  | 1       | 729  | 20 | 0.0335887  | 0 |
| 0.0880356 | 1       | 752  | 19 | 0.0241168  | 0 |
| 0.0731765 | 1       | 622  | 13 | 0.0439081  | 0 |
| 0.156     | 1       | 1326 | 36 | 0.0431578  | 0 |
| 0.0844476 | 1       | 720  | 20 | 0.0366254  | 0 |
| 0.0842697 | 1       | 720  | 20 | 0.0366254  | 0 |
| 0.0666966 | 1       | 594  | 13 | 0.0395208  | 0 |
| 0.0790588 | 1       | 672  | 19 | 0.0479511  | 0 |
| 0.0707059 | 1       | 601  | 11 | 0.049443   | 0 |
| 0.0875998 | 1       | 746  | 21 | 0.0367225  | 0 |

|             |           |      |    |           |          |
|-------------|-----------|------|----|-----------|----------|
| 0.0618605   | 1         | 526  | 15 | 0.0461238 | 0        |
| 0.0710588   | 1         | 604  | 17 | 0.0496901 | 0        |
| 0.0712941   | 1         | 606  | 17 | 0.046574  | 0        |
| 0.0974118   | 1         | 828  | 19 | 0.0301901 | 0        |
| 0.088       | 1         | 748  | 18 | 0.0388146 | 0        |
| 0.0899613   | 1         | 768  | 21 | 0.0350541 | 0        |
| 0.0699018   | 1         | 605  | 12 | 0.0327413 | 0        |
| 0.0791173   | 1         | 674  | 19 | 0.0449586 | 0        |
| 0.0334827   | 1         | 411  | 10 | 0.0497078 | 0        |
| 0.0543775   | 1         | 618  | 13 | 0.0454265 | 0        |
| 0.0789654   | 1         | 693  | 20 | 0.035266  | 0        |
| 0.103122    | 1         | 905  | 19 | 0.0129147 | 0        |
| 0.0785882   | 1         | 668  | 15 | 0.0363782 | 0        |
| 0.0924706   | 1         | 786  | 19 | 0.0446143 | 0        |
| 0.0727059   | 1         | 618  | 14 | 0.0487015 | 0        |
| 0.0957647   | 1         | 814  | 21 | 0.0320969 | 0        |
| 0.000546173 | 0.0219595 | 592  | 13 | 0.0489222 | 0        |
| 0.0685882   | 1         | 583  | 10 | 0.0426105 | 0        |
| 0.0858824   | 1         | 730  | 17 | 0.0454088 | 0        |
| 0.0566435   | 1         | 833  | 23 | 0.0353189 | 0        |
| 0.0823624   | 1         | 714  | 16 | 0.017708  | 0        |
| 0.0427276   | 1         | 683  | 19 | 0.0400328 | 0        |
| 0.0407257   | 1         | 651  | 15 | 0.0408803 | 0        |
| 0.0678232   | 1         | 606  | 10 | 0.0485426 | 0        |
| 0.100588    | 1         | 855  | 24 | 0.0238255 | 0        |
| 0.0695897   | 1         | 592  | 16 | 0.0481983 | 0        |
| 0.0691196   | 1         | 588  | 16 | 0.0358045 | 0        |
| 0.048656    | 1         | 1001 | 29 | 0.0104783 | 0        |
| 0.0956942   | 0.988012  | 1001 | 29 | 0.0104783 | 0        |
| 0.0764108   | 1         | 1572 | 42 | 0.0182818 | 0.083333 |
| 0.152104    | 1         | 1572 | 42 | 0.0182818 | 0.083333 |
| 0.0590742   | 1         | 513  | 14 | 0.0431666 | 0        |
| 0.0602113   | 1         | 513  | 14 | 0.0431666 | 0        |
| 0.0768235   | 1         | 653  | 15 | 0.0402359 | 0        |
| 0.0685882   | 1         | 583  | 11 | 0.0423368 | 0        |
| 0.102588    | 1         | 872  | 21 | 0.0297046 | 0        |
| 0.0520993   | 1         | 443  | 13 | 0.0361929 | 0        |
| 0.0880278   | 1         | 836  | 24 | 0.0162691 | 0        |
| 0.0695318   | 1         | 597  | 10 | 0.047907  | 0        |
| 0.058       | 1         | 493  | 11 | 0.0468035 | 0        |
| 0.0885882   | 1         | 753  | 21 | 0.0354513 | 0        |
| 0.0782353   | 1         | 665  | 19 | 0.0341096 | 0        |
| 0.0728235   | 1         | 619  | 18 | 0.0481188 | 0        |
| 0.0724706   | 1         | 616  | 17 | 0.0478011 | 0        |
| 0.116353    | 1         | 989  | 26 | 0.0252467 | 0        |
| 0.119822    | 1         | 1021 | 25 | 0.0335446 | 0        |
| 0.0709412   | 1         | 603  | 10 | 0.0425045 | 0        |

|           |          |      |    |            |   |
|-----------|----------|------|----|------------|---|
| 0.0691765 | 1        | 588  | 17 | 0.0457266  | 0 |
| 0.0897497 | 1        | 1126 | 31 | 0.0275331  | 0 |
| 0.130539  | 1        | 1140 | 31 | 0.013409   | 0 |
| 0.0744303 | 1        | 650  | 18 | 0.0345598  | 0 |
| 0.0689412 | 1        | 586  | 16 | 0.0284158  | 0 |
| 0.0741277 | 1        | 665  | 17 | 0.0480659  | 0 |
| 0.0560956 | 1        | 681  | 18 | 0.0420632  | 0 |
| 0.0685541 | 1        | 586  | 17 | 0.040995   | 0 |
| 0.102941  | 1        | 875  | 23 | 0.0252291  | 0 |
| 0.104797  | 1        | 994  | 24 | 0.0186614  | 0 |
| 0.107465  | 1        | 917  | 19 | 0.0259529  | 0 |
| 0.0263529 | 0.244275 | 917  | 19 | 0.0259529  | 0 |
| 0.0408865 | 1        | 690  | 19 | 0.0405184  | 0 |
| 0.0867745 | 1        | 746  | 21 | 0.0438905  | 0 |
| 0.0827651 | 1        | 704  | 15 | 0.0338094  | 0 |
| 0.0785236 | 1        | 668  | 19 | 0.0490104  | 0 |
| 0.0505593 | 1        | 678  | 15 | 0.0470684  | 0 |
| 0.0791779 | 1        | 678  | 15 | 0.0470684  | 0 |
| 0.0257271 | 1        | 345  | 10 | 0.046424   | 0 |
| 0.0715294 | 1        | 608  | 12 | 0.0472008  | 0 |
| 0.089903  | 1        | 788  | 22 | 0.0427517  | 0 |
| 0.074     | 1        | 629  | 15 | 0.0466888  | 0 |
| 0.0840757 | 1        | 755  | 19 | 0.0430519  | 0 |
| 0.0677871 | 1        | 601  | 17 | 0.0339065  | 0 |
| 0.127059  | 1        | 1080 | 24 | 0.0241786  | 0 |
| 0.0855294 | 1        | 727  | 21 | 0.0437404  | 0 |
| 0.0801177 | 1        | 681  | 16 | 0.0315672  | 0 |
| 0.09      | 1        | 765  | 21 | 0.0346039  | 0 |
| 0.0483746 | 0.569935 | 765  | 21 | 0.0346039  | 0 |
| 0.0772668 | 1        | 657  | 12 | 0.0252644  | 0 |
| 0.0958824 | 1        | 815  | 20 | 0.0335269  | 0 |
| 0.0945835 | 1        | 805  | 20 | 0.0405537  | 0 |
| 0.0792056 | 1        | 678  | 12 | 0.0327678  | 0 |
| 0.11089   | 1        | 949  | 27 | 0.00871277 | 0 |
| 0.0911765 | 1        | 775  | 22 | 0.0466182  | 0 |
| 0.0862353 | 1        | 733  | 19 | 0.0492223  | 0 |
| 0.0617725 | 1        | 536  | 13 | 0.045603   | 0 |
| 0.0558564 | 1        | 691  | 20 | 0.0454     | 0 |
| 0.0587059 | 1        | 499  | 10 | 0.0404919  | 0 |
| 0.0681713 | 1        | 589  | 10 | 0.0423633  | 0 |
| 0.0721176 | 1        | 613  | 16 | 0.0488692  | 0 |
| 0.0710588 | 1        | 604  | 14 | 0.0336682  | 0 |
| 0.0756579 | 1        | 644  | 18 | 0.0493282  | 0 |
| 0.114706  | 1        | 975  | 26 | 0.0202415  | 0 |
| 0.056693  | 1        | 695  | 20 | 0.0327237  | 0 |
| 0.0774239 | 1        | 666  | 14 | 0.0100281  | 0 |
| 0.0288249 | 1        | 718  | 19 | 0.0350806  | 0 |

|           |          |      |    |            |   |
|-----------|----------|------|----|------------|---|
| 0.0425608 | 1        | 718  | 19 | 0.0350806  | 0 |
| 0.0448031 | 1        | 1116 | 28 | 0.0330414  | 0 |
| 0.0386206 | 1        | 962  | 27 | 0.0245229  | 0 |
| 0.135434  | 1        | 1152 | 32 | 0.0355661  | 0 |
| 0.0881903 | 1        | 923  | 26 | 0.0246729  | 0 |
| 0.0707547 | 1        | 705  | 20 | 0.0416924  | 0 |
| 0.0633678 | 1        | 785  | 22 | 0.03117    | 0 |
| 0.0910356 | 1        | 785  | 22 | 0.03117    | 0 |
| 0.058791  | 1        | 638  | 18 | 0.0433167  | 0 |
| 0.0881176 | 1        | 749  | 21 | 0.0469271  | 0 |
| 0.0747302 | 1        | 637  | 18 | 0.0473597  | 0 |
| 0.0701111 | 1        | 631  | 12 | 0.0328561  | 0 |
| 0.0797397 | 1        | 821  | 24 | 0.0451175  | 0 |
| 0.111979  | 1        | 960  | 20 | 0.0216804  | 0 |
| 0.0689412 | 1        | 586  | 11 | 0.0475892  | 0 |
| 0.0693489 | 1        | 605  | 17 | 0.0465829  | 0 |
| 0.0785965 | 0.860435 | 781  | 22 | 0.0423015  | 0 |
| 0.0691765 | 1        | 588  | 17 | 0.0498844  | 0 |
| 0.132706  | 1        | 1128 | 31 | 0.0359633  | 0 |
| 0.0929412 | 1        | 790  | 22 | 0.0335887  | 0 |
| 0.0688235 | 1        | 585  | 17 | 0.038082   | 0 |
| 0.0996471 | 1        | 847  | 19 | 0.0138857  | 0 |
| 0.0709412 | 1        | 603  | 10 | 0.0473597  | 0 |
| 0.07      | 1        | 595  | 17 | 0.0465652  | 0 |
| 0.0722353 | 1        | 614  | 17 | 0.0470154  | 0 |
| 0.101055  | 1        | 862  | 20 | 0.0162956  | 0 |
| 0.064     | 1        | 544  | 16 | 0.0466005  | 0 |
| 0.0638824 | 1        | 543  | 12 | 0.049646   | 0 |
| 0.0887127 | 1        | 940  | 24 | 0.0251408  | 0 |
| 0.078827  | 1        | 672  | 19 | 0.033933   | 0 |
| 0.051579  | 1        | 717  | 20 | 0.0234989  | 0 |
| 0.0845263 | 1        | 1175 | 32 | 0.00782119 | 0 |
| 0.103529  | 1        | 880  | 24 | 0.0359987  | 0 |
| 0.0589964 | 1        | 502  | 12 | 0.0475716  | 0 |
| 0.0690588 | 1        | 587  | 14 | 0.0380643  | 0 |
| 0.0738957 | 1        | 629  | 18 | 0.0491428  | 0 |
| 0.0558824 | 1        | 475  | 14 | 0.0481807  | 0 |
| 0.0715294 | 1        | 608  | 16 | 0.0294222  | 0 |
| 0.0741176 | 1        | 630  | 18 | 0.0475539  | 0 |
| 0.117647  | 1        | 1000 | 27 | 0.0424251  | 0 |
| 0.0840661 | 1        | 717  | 14 | 0.0315672  | 0 |
| 0.0405675 | 0.535604 | 646  | 13 | 0.0362635  | 0 |
| 0.0907059 | 1        | 771  | 20 | 0.0365813  | 0 |
| 0.0604706 | 1        | 514  | 15 | 0.0489222  | 0 |
| 0.0501892 | 1        | 849  | 23 | 0.0466005  | 0 |
| 0.0587201 | 1        | 501  | 14 | 0.0408626  | 0 |
| 0.0812941 | 1        | 691  | 17 | 0.0348687  | 0 |

|           |         |      |    |           |   |
|-----------|---------|------|----|-----------|---|
| 0.0715294 | 1       | 608  | 10 | 0.0454088 | 0 |
| 0.0747059 | 1       | 635  | 17 | 0.0340919 | 0 |
| 0.0589412 | 1       | 501  | 14 | 0.0464151 | 0 |
| 0.0723174 | 1       | 616  | 17 | 0.0479776 | 0 |
| 0.0938014 | 1       | 799  | 21 | 0.0363076 | 0 |
| 0.0743773 | 1       | 636  | 18 | 0.0374287 | 0 |
| 0.0699    | 1       | 601  | 17 | 0.0424251 | 0 |
| 0.0714118 | 1       | 607  | 15 | 0.0459649 | 0 |
| 0.0936416 | 1       | 810  | 17 | 0.0445967 | 0 |
| 0.0714286 | 1       | 611  | 18 | 0.0438728 | 0 |
| 0.0833333 | 1       | 987  | 22 | 0.031223  | 0 |
| 0.0639535 | 1       | 594  | 17 | 0.0397945 | 0 |
| 0.0546188 | 1       | 596  | 11 | 0.0316114 | 0 |
| 0.121421  | 1       | 1056 | 27 | 0.0184937 | 0 |
| 0.0837647 | 1       | 712  | 20 | 0.0341537 | 0 |
| 0.0534239 | 1       | 692  | 13 | 0.049187  | 0 |
| 0.0565713 | 1       | 789  | 22 | 0.0337741 | 0 |
| 0.0744706 | 0.99061 | 639  | 18 | 0.0260589 | 0 |
| 0.0827059 | 1       | 703  | 18 | 0.0360516 | 0 |
| 0.0683571 | 1       | 585  | 15 | 0.0423721 | 0 |
| 0.0698824 | 1       | 594  | 14 | 0.0415335 | 0 |
| 0.0413835 | 1       | 609  | 17 | 0.0479423 | 0 |
| 0.0783529 | 1       | 666  | 19 | 0.0254233 | 0 |
| 0.0572941 | 1       | 487  | 14 | 0.042328  | 0 |
| 0.0850588 | 1       | 723  | 20 | 0.0172137 | 0 |
| 0.0715965 | 1       | 609  | 17 | 0.0393531 | 0 |
| 0.0761099 | 1       | 648  | 17 | 0.0478364 | 0 |
| 0.0715292 | 1       | 609  | 14 | 0.0489486 | 0 |
| 0.0658722 | 1       | 608  | 13 | 0.0475539 | 0 |
| 0.0567444 | 1       | 594  | 17 | 0.0434668 | 0 |
| 0.0722469 | 1       | 618  | 15 | 0.0482954 | 0 |
| 0.0538824 | 1       | 458  | 13 | 0.0475009 | 0 |
| 0.110706  | 1       | 941  | 24 | 0.0211684 | 0 |
| 0.0775832 | 1       | 660  | 18 | 0.0496372 | 0 |
| 0.0502354 | 1       | 651  | 18 | 0.0487279 | 0 |
| 0.115556  | 1       | 988  | 25 | 0.0483219 | 0 |
| 0.0721577 | 0.984   | 625  | 17 | 0.0337212 | 0 |
| 0.0916454 | 1       | 826  | 23 | 0.0409686 | 0 |
| 0.0527921 | 1       | 502  | 10 | 0.04668   | 0 |
| 0.108575  | 1       | 961  | 26 | 0.0232958 | 0 |
| 0.121863  | 1       | 1039 | 27 | 0.047395  | 0 |
| 0.0722353 | 1       | 614  | 17 | 0.031426  | 0 |
| 0.0702353 | 1       | 597  | 17 | 0.0399975 | 0 |
| 0.111137  | 1       | 947  | 26 | 0.0285659 | 0 |
| 0.170388  | 1       | 1450 | 40 | 0.0284335 | 0 |
| 0.0712941 | 1       | 606  | 14 | 0.0464946 | 0 |
| 0.0780259 | 1       | 664  | 19 | 0.0314172 | 0 |

|           |          |      |    |           |   |
|-----------|----------|------|----|-----------|---|
| 0.088547  | 1        | 777  | 18 | 0.0234901 | 0 |
| 0.0912941 | 1        | 776  | 22 | 0.0343479 | 0 |
| 0.188353  | 1        | 1601 | 39 | 0.0111139 | 0 |
| 0.0620178 | 1        | 619  | 17 | 0.0423633 | 0 |
| 0.0274118 | 0.148787 | 1566 | 36 | 0.0301284 | 0 |
| 0.0724417 | 1        | 618  | 16 | 0.047598  | 0 |
| 0.107873  | 1        | 918  | 23 | 0.0184054 | 0 |
| 0.0772941 | 1        | 657  | 14 | 0.0353807 | 0 |
| 0.0822526 | 1        | 704  | 14 | 0.0370227 | 0 |
| 0.0757168 | 1        | 647  | 16 | 0.0420808 | 0 |
| 0.121191  | 1        | 1034 | 24 | 0.036546  | 0 |
| 0.094566  | 1        | 804  | 23 | 0.0326883 | 0 |
| 0.0524706 | 1        | 446  | 13 | 0.0440847 | 0 |
| 0.103469  | 1        | 880  | 20 | 0.0106636 | 0 |
| 0.116118  | 1        | 987  | 16 | 0.0296252 | 0 |
| 0.086908  | 1        | 857  | 24 | 0.0322028 | 0 |
| 0.0894047 | 1        | 859  | 20 | 0.0317703 | 0 |
| 0.0705151 | 1        | 601  | 15 | 0.039565  | 0 |
| 0.0411098 | 1        | 686  | 20 | 0.0348687 | 0 |
| 0.0607167 | 1        | 715  | 20 | 0.0452411 | 0 |
| 0.0717389 | 1        | 611  | 14 | 0.0389029 | 0 |
| 0.119995  | 1        | 1022 | 25 | 0.0212302 | 0 |
| 0.0782977 | 1        | 666  | 18 | 0.0357427 | 0 |
| 0.0810874 | 1        | 692  | 15 | 0.0253174 | 0 |
| 0.0872941 | 1        | 742  | 18 | 0.0427252 | 0 |
| 0.0771765 | 1        | 656  | 17 | 0.0452676 | 0 |
| 0.0863529 | 1        | 734  | 16 | 0.0440847 | 0 |
| 0.0785939 | 1        | 673  | 13 | 0.020727  | 0 |
| 0.0187804 | 0.240713 | 673  | 13 | 0.020727  | 0 |
| 0.132308  | 1        | 1127 | 29 | 0.0134443 | 0 |
| 0.126011  | 1        | 1075 | 26 | 0.0238961 | 0 |
| 0.0441135 | 1        | 619  | 17 | 0.0466888 | 0 |
| 0.141176  | 1        | 1200 | 33 | 0.0156865 | 0 |
| 0.110015  | 1        | 981  | 28 | 0.0348864 | 0 |
| 0.0518824 | 1        | 441  | 13 | 0.0398475 | 0 |
| 0.0791392 | 1        | 673  | 18 | 0.0367578 | 0 |
| 0.0716313 | 1        | 631  | 15 | 0.0341272 | 0 |
| 0.0707059 | 1        | 601  | 12 | 0.0390795 | 0 |
| 0.0868532 | 1        | 804  | 22 | 0.025282  | 0 |
| 0.0698439 | 1        | 595  | 10 | 0.0485514 | 0 |
| 0.0636021 | 1        | 725  | 16 | 0.0452058 | 0 |
| 0.074548  | 1        | 635  | 13 | 0.0450557 | 0 |
| 0.0374919 | 1        | 635  | 13 | 0.0450557 | 0 |
| 0.132529  | 1        | 1131 | 31 | 0.0295722 | 0 |
| 0.0708235 | 1        | 602  | 13 | 0.0435285 | 0 |
| 0.0749412 | 1        | 637  | 18 | 0.0464505 | 0 |
| 0.0691629 | 1        | 604  | 15 | 0.0447909 | 0 |

|            |           |      |    |           |   |
|------------|-----------|------|----|-----------|---|
| 0.0548682  | 1         | 785  | 16 | 0.0425928 | 0 |
| 0.0630504  | 1         | 537  | 15 | 0.0254498 | 0 |
| 0.0498556  | 1         | 725  | 13 | 0.0423368 | 0 |
| 0.0932941  | 1         | 793  | 20 | 0.0489222 | 0 |
| 0.121882   | 1         | 1036 | 25 | 0.0248054 | 0 |
| 0.0612122  | 1         | 1019 | 23 | 0.0280009 | 0 |
| 0.0791765  | 1         | 673  | 19 | 0.0448527 | 0 |
| 0.0845882  | 1         | 719  | 19 | 0.048878  | 0 |
| 0.00482353 | 0.0522293 | 785  | 22 | 0.0324765 | 0 |
| 0.0709412  | 1         | 603  | 18 | 0.0475009 | 0 |
| 0.0749412  | 1         | 637  | 18 | 0.0452499 | 0 |
| 0.124118   | 1         | 1055 | 26 | 0.0186614 | 0 |
| 0.0424923  | 1         | 371  | 11 | 0.0447467 | 0 |
| 0.100963   | 1         | 860  | 24 | 0.033624  | 0 |
| 0.102419   | 1         | 889  | 24 | 0.0327501 | 0 |
| 0.0636423  | 1         | 968  | 25 | 0.0162956 | 0 |
| 0.0653284  | 1         | 755  | 21 | 0.0305609 | 0 |
| 0.0719812  | 1         | 614  | 18 | 0.0475009 | 0 |
| 0.129647   | 1         | 1102 | 27 | 0.0113875 | 0 |
| 0.0928235  | 1         | 789  | 22 | 0.023852  | 0 |
| 0.0819231  | 1         | 731  | 17 | 0.0355396 | 0 |
| 0.0708282  | 1         | 632  | 18 | 0.040845  | 0 |
| 0.0820152  | 1         | 700  | 20 | 0.0360869 | 0 |
| 0.0773286  | 1         | 660  | 15 | 0.0332974 | 0 |
| 0.0690934  | 1         | 615  | 17 | 0.0464593 | 0 |
| 0.0922269  | 1         | 808  | 22 | 0.0260677 | 0 |
| 0.106235   | 1         | 903  | 23 | 0.0180346 | 0 |
| 0.0868772  | 1         | 762  | 21 | 0.0367843 | 0 |
| 0.124941   | 1         | 1062 | 30 | 0.0170195 | 0 |
| 0.0883529  | 1         | 751  | 18 | 0.0499991 | 0 |
| 0.0513081  | 1         | 1110 | 28 | 0.0112021 | 0 |
| 0.0548211  | 1         | 1186 | 29 | 0.0175403 | 0 |
| 0.0489067  | 1         | 416  | 12 | 0.0353719 | 0 |
| 0.063103   | 1         | 981  | 24 | 0.0308346 | 0 |
| 0.0525702  | 1         | 586  | 11 | 0.0463445 | 0 |
| 0.0695294  | 1         | 591  | 17 | 0.0476775 | 0 |
| 0.0832941  | 1         | 708  | 20 | 0.0404301 | 0 |
| 0.0419408  | 1         | 357  | 10 | 0.0464328 | 0 |
| 0.0733861  | 1         | 640  | 17 | 0.0413834 | 0 |
| 0.110353   | 1         | 938  | 25 | 0.0141505 | 0 |
| 0.0898401  | 1         | 764  | 21 | 0.0326177 | 0 |
| 0.0864034  | 1         | 849  | 24 | 0.0176639 | 0 |
| 0.0359015  | 1         | 589  | 13 | 0.0380202 | 0 |
| 0.0994358  | 1         | 846  | 22 | 0.0444819 | 0 |
| 0.105035   | 1         | 895  | 22 | 0.0364489 | 0 |
| 0.0722727  | 1         | 636  | 18 | 0.0434314 | 0 |
| 0.0994592  | 1         | 846  | 24 | 0.0362811 | 0 |

|             |            |      |    |           |   |
|-------------|------------|------|----|-----------|---|
| 0.0743831   | 1          | 633  | 12 | 0.0301284 | 0 |
| 0.0995676   | 1          | 852  | 23 | 0.0419308 | 0 |
| 0.0221185   | 0.290087   | 686  | 18 | 0.0324765 | 0 |
| 0.120745    | 1          | 1245 | 35 | 0.0345421 | 0 |
| 0.0572929   | 1          | 491  | 14 | 0.0399357 | 0 |
| 0.0809719   | 1          | 1163 | 30 | 0.0173196 | 0 |
| 0.0722425   | 1          | 615  | 16 | 0.047598  | 0 |
| 0.109832    | 1          | 935  | 26 | 0.0273388 | 0 |
| 0.0803903   | 1          | 692  | 18 | 0.0292279 | 0 |
| 0.036271    | 1          | 598  | 17 | 0.0475539 | 0 |
| 0.052879    | 1          | 450  | 13 | 0.0463798 | 0 |
| 0.0862109   | 1          | 734  | 19 | 0.0244434 | 0 |
| 0.0943152   | 1          | 803  | 22 | 0.0318939 | 0 |
| 0.0408852   | 1          | 606  | 17 | 0.0372169 | 0 |
| 0.0558308   | 1          | 631  | 16 | 0.0426634 | 0 |
| 0.0848813   | 1          | 722  | 14 | 0.0329885 | 0 |
| 0.0762652   | 1          | 651  | 15 | 0.0179728 | 0 |
| 0.0890298   | 1          | 758  | 21 | 0.0316114 | 0 |
| 0.116588    | 1          | 991  | 24 | 0.0303755 | 0 |
| 0.0709377   | 1          | 609  | 17 | 0.0427341 | 0 |
| 0.07        | 1          | 595  | 14 | 0.035672  | 0 |
| 0.0706433   | 1          | 604  | 11 | 0.0476775 | 0 |
| 0.0691477   | 1          | 589  | 17 | 0.0492399 | 0 |
| 0.120686    | 1          | 1028 | 28 | 0.0174344 | 0 |
| 0.0802633   | 1          | 695  | 20 | 0.0294222 | 0 |
| 0.0683337   | 1          | 593  | 17 | 0.0423633 | 0 |
| 0.000235294 | 0.00337268 | 593  | 17 | 0.0423633 | 0 |
| 0.069947    | 1          | 607  | 11 | 0.0461503 | 0 |
| 0.0786295   | 1          | 677  | 19 | 0.044632  | 0 |
| 0.102213    | 1          | 882  | 25 | 0.0166752 | 0 |
| 0.0729384   | 1          | 628  | 17 | 0.0314878 | 0 |
| 0.0477753   | 1          | 626  | 17 | 0.0409244 | 0 |
| 0.0729519   | 1          | 626  | 17 | 0.0409244 | 0 |
| 0.0682485   | 1          | 791  | 17 | 0.0360869 | 0 |
| 0.107059    | 1          | 910  | 18 | 0.013868  | 0 |
| 0.0696232   | 1          | 606  | 11 | 0.048216  | 0 |
| 0.0832078   | 1          | 718  | 20 | 0.0368108 | 0 |
| 0.0707059   | 1          | 601  | 17 | 0.0498579 | 0 |
| 0.0749824   | 1          | 639  | 18 | 0.0426987 | 0 |
| 0.0677604   | 1          | 983  | 28 | 0.0329885 | 0 |
| 0.0768235   | 1          | 653  | 18 | 0.0439787 | 0 |
| 0.0737003   | 1          | 628  | 17 | 0.0430254 | 0 |
| 0.0716471   | 1          | 609  | 13 | 0.0434844 | 0 |
| 0.0284215   | 1          | 585  | 17 | 0.0464063 | 0 |
| 0.0454118   | 1          | 386  | 11 | 0.0488957 | 0 |
| 0.112077    | 1          | 954  | 22 | 0.0315672 | 0 |
| 0.0703529   | 1          | 598  | 16 | 0.0461944 | 0 |



|           |          |      |    |           |   |
|-----------|----------|------|----|-----------|---|
| 0.0711765 | 1        | 605  | 16 | 0.0457001 | 0 |
| 0.104695  | 1        | 892  | 25 | 0.0182024 | 0 |
| 0.0743569 | 1        | 633  | 18 | 0.0477569 | 0 |
| 0.100824  | 1        | 857  | 24 | 0.0182465 | 0 |
| 0.130824  | 1        | 1112 | 31 | 0.0165516 | 0 |
| 0.0468939 | 1        | 582  | 14 | 0.0383026 | 0 |
| 0.0772702 | 1        | 959  | 24 | 0.0281775 | 0 |
| 0.0738476 | 0.984326 | 638  | 18 | 0.0291573 | 0 |
| 0.0738824 | 1        | 628  | 13 | 0.0409686 | 0 |
| 0.0697836 | 1        | 603  | 17 | 0.0419396 | 0 |
| 0.0821437 | 1        | 725  | 20 | 0.0476687 | 0 |
| 0.0270522 | 1        | 407  | 12 | 0.0403859 | 0 |
| 0.0359033 | 1        | 407  | 12 | 0.0403859 | 0 |
| 0.112591  | 1        | 964  | 27 | 0.0172402 | 0 |
| 0.0723529 | 1        | 615  | 18 | 0.0494518 | 0 |
| 0.07485   | 1        | 661  | 19 | 0.041763  | 0 |
| 0.0722157 | 1        | 616  | 12 | 0.0462298 | 0 |
| 0.0846109 | 1        | 723  | 20 | 0.033986  | 0 |
| 0.0721176 | 1        | 613  | 12 | 0.0484719 | 0 |
| 0.0829412 | 1        | 705  | 20 | 0.0414188 | 0 |
| 0.0544444 | 1        | 833  | 23 | 0.0410921 | 0 |
| 0.0749022 | 1        | 670  | 19 | 0.0419219 | 0 |
| 0.0576859 | 1        | 516  | 11 | 0.0491517 | 0 |
| 0.0958421 | 1        | 816  | 23 | 0.033933  | 0 |
| 0.0711769 | 1        | 606  | 11 | 0.0498579 | 0 |
| 0.0767744 | 1        | 715  | 18 | 0.0324588 | 0 |
| 0.0811765 | 1        | 690  | 13 | 0.0311347 | 0 |
| 0.122768  | 1        | 1045 | 27 | 0.019447  | 0 |
| 0.0856471 | 1        | 728  | 20 | 0.0214774 | 0 |
| 0.0797647 | 1        | 678  | 19 | 0.0472008 | 0 |
| 0.0852941 | 1        | 725  | 16 | 0.0314878 | 0 |
| 0.0777647 | 1        | 661  | 19 | 0.0307286 | 0 |
| 0.0785882 | 1        | 668  | 18 | 0.0345598 | 0 |
| 0.0687059 | 1        | 584  | 16 | 0.0331739 | 0 |
| 0.0949025 | 1        | 808  | 23 | 0.0209919 | 0 |
| 0.0553059 | 1        | 763  | 22 | 0.0372875 | 0 |
| 0.101647  | 1        | 864  | 21 | 0.0319292 | 0 |
| 0.0874361 | 1        | 753  | 15 | 0.0361929 | 0 |
| 0.0823529 | 1        | 700  | 20 | 0.0448438 | 0 |
| 0.0759199 | 1        | 652  | 13 | 0.0190322 | 0 |
| 0.0602096 | 1        | 787  | 19 | 0.0352836 | 0 |
| 0.0549308 | 1        | 718  | 19 | 0.0267916 | 0 |
| 0.0386998 | 1        | 606  | 17 | 0.0480571 | 0 |
| 0.104941  | 1        | 892  | 14 | 0.0493017 | 0 |
| 0.133765  | 1        | 1137 | 26 | 0.0242845 | 0 |
| 0.0778823 | 1        | 662  | 18 | 0.0478364 | 0 |
| 0.0928235 | 1        | 789  | 22 | 0.0359369 | 0 |

|           |          |      |    |            |   |
|-----------|----------|------|----|------------|---|
| 0.119294  | 1        | 1014 | 27 | 0.0245317  | 0 |
| 0.0440038 | 1        | 375  | 11 | 0.0469271  | 0 |
| 0.0916431 | 1        | 1101 | 29 | 0.0214774  | 0 |
| 0.0808235 | 1        | 687  | 19 | 0.0451793  | 0 |
| 0.0728235 | 1        | 619  | 16 | 0.0424516  | 0 |
| 0.0843529 | 1        | 717  | 20 | 0.0383026  | 0 |
| 0.117121  | 1        | 996  | 20 | 0.0103017  | 0 |
| 0.0833725 | 1        | 709  | 20 | 0.0296517  | 0 |
| 0.0816948 | 1        | 698  | 17 | 0.0469095  | 0 |
| 0.0992941 | 1        | 844  | 18 | 0.0321322  | 0 |
| 0.072     | 1        | 612  | 16 | 0.0451881  | 0 |
| 0.0692941 | 1        | 589  | 17 | 0.0494783  | 0 |
| 0.0968235 | 1        | 823  | 23 | 0.0349129  | 0 |
| 0.0646813 | 1        | 897  | 25 | 0.0435285  | 0 |
| 0.0998886 | 1        | 897  | 25 | 0.0435285  | 0 |
| 0.0688636 | 1        | 955  | 27 | 0.0355308  | 0 |
| 0.106347  | 1        | 955  | 27 | 0.0355308  | 0 |
| 0.0800603 | 1        | 691  | 20 | 0.0364136  | 0 |
| 0.0701431 | 1        | 608  | 17 | 0.0451793  | 0 |
| 0.0690624 | 1        | 590  | 16 | 0.0395297  | 0 |
| 0.082572  | 1        | 705  | 19 | 0.0498844  | 0 |
| 0.0720636 | 1        | 616  | 13 | 0.0345156  | 0 |
| 0.0679612 | 1        | 616  | 12 | 0.0460356  | 0 |
| 0.13886   | 1        | 1186 | 30 | 0.00914532 | 0 |
| 0.101412  | 1        | 869  | 21 | 0.0218923  | 0 |
| 0.0247403 | 0.286486 | 740  | 20 | 0.0359722  | 0 |
| 0.0714452 | 1        | 613  | 14 | 0.0328737  | 0 |
| 0.0623529 | 1        | 530  | 14 | 0.0443142  | 0 |
| 0.0843303 | 1        | 719  | 20 | 0.0401917  | 0 |
| 0.0697347 | 1        | 594  | 15 | 0.0473597  | 0 |
| 0.122142  | 1        | 1063 | 23 | 0.033933   | 0 |
| 0.129294  | 1        | 1099 | 30 | 0.0126322  | 0 |
| 0.0598983 | 1        | 577  | 13 | 0.0479776  | 0 |
| 0.0682801 | 1        | 584  | 13 | 0.04796    | 0 |
| 0.0709412 | 1        | 603  | 17 | 0.049443   | 0 |
| 0.0908235 | 1        | 772  | 16 | 0.0367843  | 0 |
| 0.0684642 | 1        | 584  | 13 | 0.0455942  | 0 |
| 0.0921377 | 1        | 784  | 16 | 0.04796    | 0 |
| 0.0849489 | 1        | 723  | 20 | 0.0499726  | 0 |
| 0.0680623 | 1        | 647  | 12 | 0.0418072  | 0 |
| 0.110471  | 1        | 940  | 26 | 0.0301107  | 0 |
| 0.0446376 | 1        | 380  | 11 | 0.044835   | 0 |
| 0.0473201 | 1        | 407  | 10 | 0.044579   | 0 |
| 0.0634816 | 1        | 869  | 20 | 0.045859   | 0 |
| 0.122588  | 1        | 1042 | 24 | 0.0188909  | 0 |
| 0.0889378 | 1        | 767  | 20 | 0.0434668  | 0 |
| 0.072148  | 1        | 616  | 16 | 0.0473597  | 0 |

|           |          |      |    |            |   |
|-----------|----------|------|----|------------|---|
| 0.121765  | 1        | 1035 | 27 | 0.0182642  | 0 |
| 0.0745972 | 1        | 639  | 14 | 0.0335711  | 0 |
| 0.0979841 | 1        | 836  | 22 | 0.0115641  | 0 |
| 0.0691765 | 1        | 588  | 16 | 0.0251231  | 0 |
| 0.0691602 | 1        | 588  | 16 | 0.0251231  | 0 |
| 0.103529  | 1        | 880  | 24 | 0.0228192  | 0 |
| 0.0715294 | 1        | 608  | 17 | 0.0444554  | 0 |
| 0.0956471 | 1        | 813  | 22 | 0.0146184  | 0 |
| 0.0734118 | 1        | 624  | 18 | 0.0451528  | 0 |
| 0.0804706 | 1        | 684  | 14 | 0.035469   | 0 |
| 0.103906  | 1        | 915  | 23 | 0.0239226  | 0 |
| 0.0335084 | 1        | 606  | 17 | 0.0225985  | 0 |
| 0.0838824 | 1        | 713  | 21 | 0.0354249  | 0 |
| 0.0782092 | 1        | 697  | 20 | 0.035469   | 0 |
| 0.0507707 | 1        | 998  | 27 | 0.0360251  | 0 |
| 0.120588  | 1        | 1025 | 16 | 0.0431931  | 0 |
| 0.0712941 | 1        | 606  | 16 | 0.0483484  | 0 |
| 0.0723529 | 1        | 615  | 17 | 0.0477658  | 0 |
| 0.0948235 | 1        | 806  | 22 | 0.0481188  | 0 |
| 0.0527227 | 0.452475 | 1010 | 29 | 0.031885   | 0 |
| 0.104118  | 1        | 885  | 25 | 0.0312318  | 0 |
| 0.0874118 | 1        | 743  | 21 | 0.0175491  | 0 |
| 0.112748  | 1        | 987  | 24 | 0.0175756  | 0 |
| 0.121088  | 1        | 1060 | 30 | 0.0238167  | 0 |
| 0.0910588 | 1        | 774  | 19 | 0.0484543  | 0 |
| 0.0814118 | 1        | 692  | 19 | 0.0475716  | 0 |
| 0.0559616 | 1        | 559  | 16 | 0.0342685  | 0 |
| 0.0739739 | 1        | 629  | 13 | 0.0475539  | 0 |
| 0.0707059 | 1        | 601  | 13 | 0.0487986  | 0 |
| 0.0699732 | 1        | 601  | 13 | 0.0487986  | 0 |
| 0.0870332 | 1        | 1135 | 28 | 0.0107166  | 0 |
| 0.0485459 | 1        | 424  | 12 | 0.0471831  | 0 |
| 0.0825882 | 1        | 702  | 18 | 0.035469   | 0 |
| 0.131176  | 1        | 1115 | 31 | 0.0284158  | 0 |
| 0.10573   | 1        | 906  | 15 | 0.0324147  | 0 |
| 0.0736375 | 1        | 631  | 15 | 0.0468035  | 0 |
| 0.072627  | 1        | 619  | 14 | 0.036952   | 0 |
| 0.0775792 | 1        | 664  | 18 | 0.0311347  | 0 |
| 0.0689333 | 1        | 590  | 10 | 0.0215392  | 0 |
| 0.116279  | 1        | 995  | 28 | 0.0351247  | 0 |
| 0.069478  | 1        | 603  | 17 | 0.0468124  | 0 |
| 0.0923474 | 1        | 788  | 22 | 0.034957   | 0 |
| 0.0740828 | 1        | 630  | 18 | 0.0434138  | 0 |
| 0.144     | 1        | 1224 | 29 | 0.00899525 | 0 |
| 0.0264706 | 0.367047 | 613  | 18 | 0.0436963  | 0 |
| 0.163555  | 1        | 1393 | 37 | 0.00802422 | 0 |
| 0.0871452 | 1        | 743  | 15 | 0.0466888  | 0 |

|           |   |      |    |           |   |
|-----------|---|------|----|-----------|---|
| 0.0405882 | 1 | 345  | 10 | 0.045038  | 0 |
| 0.138977  | 1 | 1182 | 26 | 0.0120584 | 0 |
| 0.0770588 | 1 | 655  | 14 | 0.0326089 | 0 |
| 0.128445  | 1 | 1114 | 26 | 0.0177257 | 0 |
| 0.0439926 | 1 | 621  | 17 | 0.0444025 | 0 |
| 0.0459124 | 1 | 392  | 11 | 0.0482866 | 0 |
| 0.0943529 | 1 | 802  | 23 | 0.0452676 | 0 |
| 0.0272441 | 1 | 614  | 17 | 0.0423368 | 0 |
| 0.0272441 | 1 | 614  | 14 | 0.0474833 | 0 |
| 0.121529  | 1 | 1033 | 25 | 0.0243552 | 0 |
| 0.0878824 | 1 | 747  | 21 | 0.0463798 | 0 |
| 0.104353  | 1 | 887  | 19 | 0.0311965 | 0 |
| 0.0569746 | 1 | 658  | 19 | 0.0347628 | 0 |
| 0.070728  | 1 | 613  | 12 | 0.043405  | 0 |
| 0.0685358 | 1 | 594  | 12 | 0.0426987 | 0 |
| 0.054     | 1 | 459  | 11 | 0.0240197 | 0 |
| 0.134353  | 1 | 1142 | 31 | 0.025132  | 0 |
| 0.0738824 | 1 | 628  | 18 | 0.0301372 | 0 |
| 0.130941  | 1 | 1113 | 26 | 0.0144771 | 0 |
| 0.0644706 | 1 | 548  | 15 | 0.0367313 | 0 |
| 0.0934118 | 1 | 794  | 22 | 0.0331739 | 0 |
| 0.0718824 | 1 | 611  | 17 | 0.0489575 | 0 |
| 0.170299  | 1 | 1555 | 42 | 0.0336329 | 0 |
| 0.0475294 | 1 | 404  | 10 | 0.0460002 | 0 |
| 0.0848235 | 1 | 721  | 20 | 0.0330591 | 0 |
| 0.0712941 | 1 | 606  | 16 | 0.0461415 | 0 |
| 0.0539482 | 1 | 744  | 21 | 0.0478717 | 0 |
| 0.0662353 | 1 | 563  | 12 | 0.0240374 | 0 |
| 0.0986526 | 1 | 842  | 24 | 0.0338359 | 0 |
| 0.0895294 | 1 | 761  | 15 | 0.035469  | 0 |
| 0.112     | 1 | 952  | 25 | 0.0479864 | 0 |
| 0.0620134 | 1 | 924  | 21 | 0.0249643 | 0 |
| 0.0876471 | 1 | 745  | 15 | 0.0463798 | 0 |
| 0.116471  | 1 | 990  | 26 | 0.0415777 | 0 |
| 0.064184  | 1 | 586  | 16 | 0.0459649 | 0 |
| 0.0727059 | 1 | 618  | 12 | 0.0184937 | 0 |
| 0.118462  | 1 | 1017 | 25 | 0.0250967 | 0 |
| 0.100953  | 1 | 1017 | 25 | 0.0250967 | 0 |
| 0.0707059 | 1 | 601  | 15 | 0.0351247 | 0 |
| 0.114706  | 1 | 975  | 22 | 0.0175756 | 0 |
| 0.0798595 | 1 | 682  | 17 | 0.044632  | 0 |
| 0.0579581 | 1 | 587  | 17 | 0.0485337 | 0 |
| 0.0978476 | 1 | 991  | 27 | 0.0230928 | 0 |
| 0.0844706 | 1 | 718  | 19 | 0.0363782 | 0 |
| 0.0790588 | 1 | 672  | 17 | 0.0107343 | 0 |
| 0.076842  | 1 | 656  | 19 | 0.0255645 | 0 |
| 0.0557489 | 1 | 753  | 21 | 0.0355396 | 0 |

|           |   |      |    |           |   |
|-----------|---|------|----|-----------|---|
| 0.0696664 | 1 | 593  | 17 | 0.0444643 | 0 |
| 0.0478436 | 1 | 416  | 12 | 0.0423986 | 0 |
| 0.0796471 | 1 | 677  | 18 | 0.0220953 | 0 |
| 0.0836921 | 1 | 797  | 22 | 0.0315672 | 0 |
| 0.0754695 | 1 | 643  | 12 | 0.0491958 | 0 |
| 0.0710588 | 1 | 604  | 17 | 0.044412  | 0 |
| 0.0996471 | 1 | 847  | 24 | 0.02989   | 0 |
| 0.0969412 | 1 | 824  | 23 | 0.036493  | 0 |
| 0.0763297 | 1 | 663  | 19 | 0.0321234 | 0 |
| 0.0844394 | 1 | 738  | 21 | 0.0327237 | 0 |
| 0.0904255 | 1 | 952  | 25 | 0.0249554 | 0 |
| 0.118588  | 1 | 1008 | 22 | 0.0224484 | 0 |
| 0.0836843 | 1 | 775  | 22 | 0.0348864 | 0 |
| 0.0697101 | 1 | 594  | 16 | 0.047448  | 0 |
| 0.0729412 | 1 | 620  | 17 | 0.0395561 | 0 |
| 0.0810588 | 1 | 689  | 19 | 0.0232958 | 0 |
| 0.0692941 | 1 | 589  | 15 | 0.0253968 | 0 |
| 0.0830588 | 1 | 706  | 18 | 0.033677  | 0 |
| 0.125014  | 1 | 1098 | 25 | 0.0234724 | 0 |
| 0.0760563 | 1 | 648  | 15 | 0.0463975 | 0 |
| 0.108685  | 1 | 926  | 26 | 0.0362635 | 0 |
| 0.0684619 | 1 | 600  | 17 | 0.0419749 | 0 |
| 0.0855294 | 1 | 727  | 17 | 0.0209565 | 0 |
| 0.092     | 1 | 782  | 19 | 0.0244787 | 0 |
| 0.07871   | 1 | 698  | 20 | 0.0489486 | 0 |
| 0.105576  | 1 | 924  | 20 | 0.0356191 | 0 |
| 0.0350939 | 1 | 596  | 11 | 0.0195088 | 0 |
| 0.0346229 | 1 | 588  | 17 | 0.049081  | 0 |
| 0.110996  | 1 | 965  | 26 | 0.0354072 | 0 |
| 0.0694118 | 1 | 590  | 17 | 0.0295634 | 0 |
| 0.0699342 | 1 | 595  | 11 | 0.0467859 | 0 |
| 0.07      | 1 | 595  | 11 | 0.0467859 | 0 |
| 0.0707789 | 1 | 607  | 17 | 0.0467241 | 0 |
| 0.0757309 | 1 | 645  | 18 | 0.0326883 | 0 |
| 0.0735294 | 1 | 625  | 17 | 0.0455059 | 0 |
| 0.0258699 | 1 | 739  | 16 | 0.0222983 | 0 |
| 0.130067  | 1 | 1107 | 24 | 0.0309581 | 0 |
| 0.120516  | 1 | 1028 | 28 | 0.0338359 | 0 |
| 0.131647  | 1 | 1119 | 62 | 0.0254233 | 0 |
| 0.0352007 | 1 | 1383 | 39 | 0.0122526 | 0 |
| 0.110588  | 1 | 940  | 25 | 0.0229074 | 0 |
| 0.0830588 | 1 | 706  | 39 | 0.0353189 | 0 |
| 0.0778823 | 1 | 662  | 18 | 0.0332621 | 0 |
| 0.105059  | 1 | 893  | 25 | 0.0192528 | 0 |
| 0.0714702 | 1 | 613  | 14 | 0.0488251 | 0 |
| 0.0857512 | 1 | 730  | 20 | 0.0422839 | 0 |
| 0.0374414 | 1 | 607  | 17 | 0.0457972 | 0 |

|           |   |      |    |           |   |
|-----------|---|------|----|-----------|---|
| 0.0744706 | 1 | 633  | 15 | 0.0307551 | 0 |
| 0.0762353 | 1 | 648  | 17 | 0.047395  | 0 |
| 0.106941  | 1 | 909  | 24 | 0.0174255 | 0 |
| 0.092     | 1 | 782  | 22 | 0.0472449 | 0 |
| 0.0795388 | 1 | 683  | 19 | 0.0356279 | 0 |
| 0.0691765 | 1 | 588  | 17 | 0.0328825 | 0 |
| 0.0814172 | 1 | 694  | 16 | 0.0326707 | 0 |
| 0.0555814 | 1 | 478  | 13 | 0.0470242 | 0 |
| 0.124883  | 1 | 1066 | 29 | 0.0151922 | 0 |
| 0.0717973 | 1 | 612  | 12 | 0.042328  | 0 |
| 0.0736471 | 1 | 626  | 17 | 0.0447909 | 0 |
| 0.0769412 | 1 | 654  | 18 | 0.0480659 | 0 |
| 0.0523445 | 1 | 595  | 17 | 0.0472891 | 0 |
| 0.0738067 | 1 | 920  | 26 | 0.025388  | 0 |
| 0.0766145 | 1 | 955  | 25 | 0.0173196 | 0 |
| 0.0587059 | 1 | 499  | 14 | 0.0488957 | 0 |
| 0.074     | 1 | 629  | 18 | 0.0489663 | 0 |
| 0.0910588 | 1 | 774  | 15 | 0.0113434 | 0 |
| 0.0771765 | 1 | 656  | 19 | 0.049443  | 0 |
| 0.0696471 | 1 | 592  | 17 | 0.0499815 | 0 |
| 0.0532086 | 1 | 597  | 11 | 0.0437669 | 0 |
| 0.0765324 | 1 | 663  | 19 | 0.0384792 | 0 |
| 0.0817647 | 1 | 695  | 19 | 0.0403065 | 0 |
| 0.11557   | 1 | 985  | 28 | 0.0174608 | 0 |
| 0.0698621 | 1 | 755  | 16 | 0.0225102 | 0 |
| 0.074     | 1 | 629  | 13 | 0.0469271 | 0 |
| 0.055881  | 1 | 477  | 14 | 0.0498844 | 0 |
| 0.0713312 | 1 | 1151 | 30 | 0.0323882 | 0 |
| 0.0393627 | 1 | 336  | 10 | 0.0487015 | 0 |
| 0.0723529 | 1 | 615  | 12 | 0.0355308 | 0 |
| 0.088115  | 1 | 754  | 21 | 0.0326177 | 0 |
| 0.0869412 | 1 | 739  | 21 | 0.017814  | 0 |
| 0.0466589 | 1 | 398  | 11 | 0.0374199 | 0 |
| 0.0704374 | 1 | 599  | 17 | 0.0415247 | 0 |
| 0.0752941 | 1 | 640  | 12 | 0.0402623 | 0 |
| 0.0730588 | 1 | 621  | 18 | 0.0404654 | 0 |
| 0.0991765 | 1 | 843  | 19 | 0.0347275 | 0 |
| 0.0746461 | 1 | 638  | 18 | 0.0298459 | 0 |
| 0.0702353 | 1 | 597  | 17 | 0.0491958 | 0 |
| 0.0691765 | 1 | 588  | 11 | 0.0391766 | 0 |
| 0.0695873 | 1 | 602  | 17 | 0.04796   | 0 |
| 0.0768235 | 1 | 653  | 16 | 0.0371197 | 0 |
| 0.117661  | 1 | 1002 | 21 | 0.0326177 | 0 |
| 0.117882  | 1 | 1002 | 21 | 0.0326177 | 0 |
| 0.0636321 | 1 | 541  | 15 | 0.0374287 | 0 |
| 0.0491765 | 1 | 418  | 12 | 0.0475539 | 0 |
| 0.0855294 | 1 | 727  | 20 | 0.0316732 | 0 |

|           |          |      |    |            |   |
|-----------|----------|------|----|------------|---|
| 0.0805882 | 1        | 685  | 18 | 0.0283187  | 0 |
| 0.0818246 | 1        | 696  | 20 | 0.0368108  | 0 |
| 0.0298485 | 1        | 597  | 17 | 0.0499903  | 0 |
| 0.0954118 | 1        | 811  | 19 | 0.0294133  | 0 |
| 0.11531   | 1        | 1004 | 28 | 0.0383026  | 0 |
| 0.0916031 | 1        | 864  | 24 | 0.0250878  | 0 |
| 0.126471  | 1        | 1075 | 19 | 0.0310641  | 0 |
| 0.0615288 | 1        | 586  | 11 | 0.0314348  | 0 |
| 0.0722835 | 1        | 616  | 10 | 0.0492664  | 0 |
| 0.0784682 | 1        | 668  | 19 | 0.0246729  | 0 |
| 0.0783854 | 1        | 668  | 19 | 0.0246729  | 0 |
| 0.126462  | 1        | 1081 | 25 | 0.0210448  | 0 |
| 0.0693058 | 1        | 590  | 17 | 0.0425663  | 0 |
| 0.0704706 | 1        | 599  | 17 | 0.0497078  | 0 |
| 0.100536  | 1        | 1201 | 29 | 0.00851857 | 0 |
| 0.0746693 | 1        | 892  | 19 | 0.0365901  | 0 |
| 0.0712453 | 1        | 611  | 13 | 0.0444113  | 0 |
| 0.117647  | 1        | 1000 | 23 | 0.0303137  | 0 |
| 0.0755175 | 1        | 653  | 18 | 0.0338447  | 0 |
| 0.0757488 | 1        | 655  | 16 | 0.0391324  | 0 |
| 0.0136471 | 0.191736 | 605  | 17 | 0.0443495  | 0 |
| 0.052402  | 1        | 805  | 19 | 0.0149362  | 0 |
| 0.0697647 | 1        | 593  | 14 | 0.0482601  | 0 |
| 0.112494  | 1        | 958  | 20 | 0.018732   | 0 |
| 0.0762642 | 1        | 650  | 15 | 0.0493282  | 0 |
| 0.0736756 | 1        | 815  | 18 | 0.0306845  | 0 |
| 0.0924517 | 1        | 790  | 22 | 0.0358574  | 0 |
| 0.119882  | 1        | 1019 | 27 | 0.00914532 | 0 |
| 0.131412  | 1        | 1117 | 27 | 0.0332268  | 0 |
| 0.0717047 | 1        | 612  | 17 | 0.0310906  | 0 |
| 0.0955069 | 1        | 812  | 23 | 0.0450557  | 0 |
| 0.0478727 | 1        | 629  | 18 | 0.0340301  | 0 |
| 0.0656823 | 1        | 863  | 24 | 0.0496195  | 0 |
| 0.086     | 1        | 731  | 18 | 0.0119525  | 0 |
| 0.104118  | 1        | 885  | 22 | 0.0245405  | 0 |
| 0.140118  | 1        | 1191 | 30 | 0.0219629  | 0 |
| 0.0776471 | 1        | 660  | 18 | 0.0285482  | 0 |
| 0.115126  | 1        | 1010 | 26 | 0.0235518  | 0 |
| 0.0758824 | 1        | 645  | 16 | 0.0349835  | 0 |
| 0.0911321 | 1        | 780  | 22 | 0.0353984  | 0 |
| 0.0917647 | 1        | 780  | 22 | 0.0353984  | 0 |
| 0.140671  | 1        | 1204 | 33 | 0.0202415  | 0 |
| 0.0751085 | 1        | 675  | 19 | 0.0362811  | 0 |
| 0.0376295 | 1        | 614  | 17 | 0.0466447  | 0 |
| 0.0925882 | 1        | 787  | 22 | 0.039768   | 0 |
| 0.11451   | 1        | 977  | 27 | 0.0222277  | 0 |
| 0.0852086 | 1        | 727  | 20 | 0.0250437  | 0 |

|           |          |      |    |           |          |
|-----------|----------|------|----|-----------|----------|
| 0.0729412 | 1        | 620  | 11 | 0.0496813 | 0        |
| 0.0729412 | 1        | 620  | 18 | 0.0297488 | 0        |
| 0.0703704 | 1        | 608  | 16 | 0.0317703 | 0        |
| 0.0797454 | 1        | 689  | 19 | 0.0275331 | 0        |
| 0.0943529 | 1        | 802  | 20 | 0.0210801 | 0        |
| 0.0576471 | 1        | 490  | 10 | 0.0488074 | 0        |
| 0.144461  | 1        | 1377 | 29 | 0.014486  | 0        |
| 0.0882082 | 1        | 766  | 18 | 0.0345421 | 0        |
| 0.0708199 | 1        | 615  | 16 | 0.0487015 | 0        |
| 0.0641302 | 1        | 595  | 17 | 0.0391854 | 0        |
| 0.0941825 | 1        | 803  | 21 | 0.0348864 | 0        |
| 0.029835  | 1        | 481  | 14 | 0.0329443 | 0        |
| 0.0876471 | 1        | 745  | 21 | 0.0368373 | 0        |
| 0.0820615 | 1        | 699  | 15 | 0.0297488 | 0        |
| 0.0959738 | 1        | 820  | 23 | 0.034648  | 0        |
| 0.0990588 | 1        | 842  | 24 | 0.0341184 | 0        |
| 0.0885922 | 1        | 876  | 23 | 0.0476775 | 0        |
| 0.0414439 | 1        | 597  | 17 | 0.0471743 | 0        |
| 0.160509  | 1        | 1664 | 43 | 0.0283187 | 0.454545 |
| 0.0711765 | 1        | 605  | 12 | 0.047598  | 0        |
| 0.0755294 | 1        | 642  | 18 | 0.0417895 | 0        |
| 0.127392  | 1        | 1085 | 25 | 0.0314348 | 0        |
| 0.124809  | 1        | 1063 | 28 | 0.0111492 | 0        |
| 0.0447059 | 1        | 380  | 11 | 0.0484102 | 0        |
| 0.0872941 | 1        | 742  | 21 | 0.0399181 | 0        |
| 0.0811765 | 1        | 690  | 18 | 0.0483042 | 0        |
| 0.0962136 | 1        | 836  | 17 | 0.0161985 | 0        |
| 0.0670963 | 0.991497 | 588  | 16 | 0.0405184 | 0        |
| 0.0943529 | 1        | 802  | 23 | 0.0498137 | 0        |
| 0.0910245 | 1        | 789  | 21 | 0.0498755 | 0        |
| 0.132235  | 1        | 1124 | 30 | 0.0184054 | 0        |
| 0.104     | 1        | 884  | 21 | 0.0354337 | 0        |
| 0.0316667 | 1        | 456  | 13 | 0.0141417 | 0        |
| 0.0644943 | 1        | 667  | 14 | 0.0491782 | 0        |
| 0.0559684 | 1        | 708  | 16 | 0.0322381 | 0        |
| 0.0713998 | 1        | 708  | 16 | 0.0322381 | 0        |
| 0.0525156 | 1        | 667  | 19 | 0.0337918 | 0        |
| 0.0770297 | 1        | 667  | 19 | 0.0337918 | 0        |
| 0.0817189 | 1        | 696  | 18 | 0.0325736 | 0        |
| 0.0374831 | 1        | 610  | 17 | 0.0460885 | 0        |
| 0.0625882 | 1        | 532  | 15 | 0.0477658 | 0        |
| 0.0922546 | 1        | 1016 | 25 | 0.0220953 | 0        |
| 0.0777439 | 1        | 663  | 19 | 0.0449674 | 0        |
| 0.111697  | 1        | 954  | 22 | 0.0226338 | 0        |
| 0.07798   | 1        | 664  | 18 | 0.0317703 | 0        |
| 0.124839  | 1        | 1063 | 30 | 0.0114581 | 0        |
| 0.0677829 | 1        | 587  | 16 | 0.0392737 | 0        |



|           |   |      |    |           |   |
|-----------|---|------|----|-----------|---|
| 0.0670627 | 1 | 587  | 16 | 0.0392737 | 0 |
| 0.103647  | 1 | 881  | 23 | 0.0223425 | 0 |
| 0.0689412 | 1 | 586  | 16 | 0.0481365 | 0 |
| 0.0622353 | 1 | 529  | 13 | 0.0209919 | 0 |
| 0.125412  | 1 | 1066 | 30 | 0.0146625 | 0 |
| 0.0572941 | 1 | 487  | 14 | 0.0491605 | 0 |
| 0.050596  | 1 | 590  | 15 | 0.0475539 | 0 |
| 0.0384913 | 1 | 596  | 17 | 0.0353278 | 0 |
| 0.0712271 | 1 | 606  | 17 | 0.0423633 | 0 |
| 0.0831765 | 1 | 707  | 20 | 0.0495666 | 0 |
| 0.136588  | 1 | 1161 | 33 | 0.0366784 | 0 |
| 0.0342958 | 1 | 620  | 14 | 0.0481983 | 0 |
| 0.0292263 | 1 | 380  | 11 | 0.0366166 | 0 |
| 0.0698792 | 1 | 596  | 17 | 0.0460532 | 0 |
| 0.0584706 | 1 | 497  | 11 | 0.0405095 | 0 |
| 0.0787531 | 1 | 672  | 19 | 0.042019  | 0 |
| 0.0703529 | 1 | 598  | 16 | 0.0446143 | 0 |
| 0.0955796 | 1 | 813  | 19 | 0.0228368 | 0 |
| 0.0958824 | 1 | 815  | 23 | 0.0286983 | 0 |
| 0.0820956 | 1 | 807  | 23 | 0.0287777 | 0 |
| 0.0534079 | 1 | 525  | 15 | 0.0493547 | 0 |
| 0.0715034 | 1 | 614  | 15 | 0.0451175 | 0 |
| 0.0710039 | 1 | 621  | 18 | 0.0340301 | 0 |
| 0.0725882 | 1 | 617  | 17 | 0.0480306 | 0 |
| 0.0708152 | 1 | 602  | 12 | 0.0411539 | 0 |
| 0.138118  | 1 | 1174 | 30 | 0.0128176 | 0 |
| 0.0650582 | 1 | 604  | 17 | 0.0463534 | 0 |
| 0.0576636 | 1 | 617  | 17 | 0.0484013 | 0 |
| 0.0826311 | 1 | 706  | 18 | 0.0316114 | 0 |
| 0.0812266 | 1 | 694  | 16 | 0.0343303 | 0 |
| 0.0780665 | 1 | 667  | 19 | 0.0430607 | 0 |
| 0.077951  | 1 | 665  | 19 | 0.0344362 | 0 |
| 0.0711765 | 1 | 605  | 13 | 0.0458237 | 0 |
| 0.0741176 | 1 | 630  | 18 | 0.0398122 | 0 |
| 0.0772025 | 1 | 680  | 18 | 0.0359987 | 0 |
| 0.0794118 | 1 | 675  | 19 | 0.0328561 | 0 |
| 0.0558354 | 1 | 931  | 26 | 0.0231458 | 0 |
| 0.125279  | 1 | 1065 | 25 | 0.0188556 | 0 |
| 0.0720846 | 1 | 620  | 17 | 0.0496372 | 0 |
| 0.0861176 | 1 | 732  | 18 | 0.0234283 | 0 |
| 0.102353  | 1 | 870  | 18 | 0.0344274 | 0 |
| 0.111714  | 1 | 967  | 25 | 0.0134002 | 0 |
| 0.108711  | 1 | 941  | 27 | 0.0347716 | 0 |
| 0.0403292 | 1 | 343  | 10 | 0.0452499 | 0 |
| 0.100118  | 1 | 851  | 22 | 0.0242227 | 0 |
| 0.0654683 | 1 | 641  | 18 | 0.037058  | 0 |
| 0.103755  | 1 | 887  | 25 | 0.0297311 | 0 |

|           |   |      |    |           |   |
|-----------|---|------|----|-----------|---|
| 0.0704706 | 1 | 599  | 12 | 0.0466447 | 0 |
| 0.103247  | 1 | 884  | 24 | 0.0343303 | 0 |
| 0.0702353 | 1 | 597  | 17 | 0.020524  | 0 |
| 0.0688079 | 1 | 587  | 17 | 0.0438552 | 0 |
| 0.0661118 | 1 | 564  | 16 | 0.0359633 | 0 |
| 0.0692334 | 1 | 615  | 17 | 0.0422309 | 0 |
| 0.0715199 | 1 | 615  | 16 | 0.043043  | 0 |
| 0.0736007 | 1 | 668  | 19 | 0.0469801 | 0 |
| 0.0414563 | 1 | 706  | 16 | 0.0297046 | 0 |
| 0.086     | 1 | 731  | 21 | 0.0323264 | 0 |
| 0.0951765 | 1 | 809  | 23 | 0.0340125 | 0 |
| 0.0753751 | 1 | 648  | 18 | 0.037261  | 0 |
| 0.0634079 | 1 | 777  | 21 | 0.0331209 | 0 |
| 0.0489636 | 1 | 600  | 14 | 0.0414452 | 0 |
| 0.0725589 | 1 | 619  | 15 | 0.0460002 | 0 |
| 0.0718347 | 1 | 619  | 15 | 0.0460002 | 0 |
| 0.0737311 | 1 | 629  | 13 | 0.0289631 | 0 |
| 0.0952941 | 1 | 810  | 20 | 0.0114405 | 0 |
| 0.110824  | 1 | 942  | 26 | 0.0210536 | 0 |
| 0.0695294 | 1 | 591  | 11 | 0.0328031 | 0 |
| 0.0893157 | 1 | 1009 | 28 | 0.0210978 | 0 |
| 0.0791443 | 1 | 677  | 17 | 0.0141593 | 0 |
| 0.0799812 | 1 | 680  | 19 | 0.0483131 | 0 |
| 0.109504  | 1 | 931  | 22 | 0.0353807 | 0 |
| 0.0910588 | 1 | 774  | 21 | 0.0339154 | 0 |
| 0.0892941 | 1 | 759  | 20 | 0.0352483 | 0 |
| 0.0839137 | 1 | 747  | 21 | 0.0315319 | 0 |
| 0.0831765 | 1 | 707  | 20 | 0.0393443 | 0 |
| 0.0216946 | 1 | 593  | 17 | 0.0424516 | 0 |
| 0.0791847 | 1 | 676  | 18 | 0.0439346 | 0 |
| 0.0725608 | 1 | 618  | 18 | 0.0482336 | 0 |
| 0.0472815 | 1 | 567  | 16 | 0.0353807 | 0 |
| 0.0774118 | 1 | 658  | 18 | 0.0452499 | 0 |
| 0.0263927 | 1 | 352  | 10 | 0.0468653 | 0 |
| 0.0434116 | 1 | 708  | 20 | 0.0450204 | 0 |
| 0.0355268 | 1 | 609  | 17 | 0.0489486 | 0 |
| 0.0694337 | 1 | 721  | 21 | 0.0453823 | 0 |
| 0.0447343 | 1 | 878  | 25 | 0.0186614 | 0 |
| 0.0825882 | 1 | 702  | 20 | 0.0320969 | 0 |
| 0.111059  | 1 | 944  | 22 | 0.03644   | 0 |
| 0.0743529 | 1 | 632  | 16 | 0.048216  | 0 |
| 0.0605882 | 1 | 515  | 15 | 0.0345421 | 0 |
| 0.0570647 | 1 | 855  | 24 | 0.0335799 | 0 |
| 0.0622706 | 1 | 933  | 27 | 0.0359633 | 0 |
| 0.0170405 | 1 | 332  | 10 | 0.0460002 | 0 |
| 0.0748681 | 1 | 880  | 25 | 0.0238608 | 0 |
| 0.103517  | 1 | 880  | 25 | 0.0238608 | 0 |

|           |          |      |    |           |   |
|-----------|----------|------|----|-----------|---|
| 0.0770313 | 1        | 657  | 18 | 0.0442436 | 0 |
| 0.0802353 | 1        | 682  | 19 | 0.0295369 | 0 |
| 0.178941  | 1        | 1521 | 43 | 0.029122  | 0 |
| 0.0714118 | 1        | 607  | 17 | 0.0474744 | 0 |
| 0.0723359 | 1        | 615  | 10 | 0.0458325 | 0 |
| 0.0700375 | 1        | 597  | 16 | 0.0435992 | 0 |
| 0.037206  | 0.498433 | 638  | 18 | 0.0357074 | 0 |
| 0.0976471 | 1        | 830  | 21 | 0.0347363 | 0 |
| 0.070635  | 1        | 604  | 14 | 0.0398828 | 0 |
| 0.0710588 | 1        | 604  | 14 | 0.0398828 | 0 |
| 0.0815731 | 1        | 838  | 24 | 0.0147684 | 0 |
| 0.0980239 | 1        | 1007 | 28 | 0.0239667 | 0 |
| 0.0692941 | 1        | 589  | 10 | 0.0416395 | 0 |
| 0.0725882 | 1        | 617  | 18 | 0.039565  | 0 |
| 0.0289283 | 1        | 630  | 18 | 0.0310729 | 0 |
| 0.0284691 | 1        | 620  | 14 | 0.0489133 | 0 |
| 0.102806  | 1        | 883  | 25 | 0.0330414 | 0 |
| 0.0743975 | 1        | 639  | 18 | 0.0474215 | 0 |
| 0.0880488 | 1        | 750  | 21 | 0.0491252 | 0 |
| 0.075715  | 1        | 646  | 18 | 0.0489486 | 0 |
| 0.0775294 | 1        | 659  | 18 | 0.0445614 | 0 |
| 0.0844047 | 1        | 755  | 19 | 0.0329796 | 0 |
| 0.105882  | 1        | 900  | 25 | 0.0355926 | 0 |
| 0.110353  | 1        | 938  | 22 | 0.0452764 | 0 |
| 0.122824  | 1        | 1044 | 28 | 0.02477   | 0 |
| 0.0929193 | 1        | 790  | 18 | 0.0337741 | 0 |
| 0.0816471 | 1        | 694  | 13 | 0.0435727 | 0 |
| 0.0430562 | 1        | 723  | 19 | 0.0475009 | 0 |
| 0.128588  | 1        | 1093 | 26 | 0.0482778 | 0 |
| 0.0807059 | 1        | 686  | 16 | 0.0254321 | 0 |
| 0.0738838 | 1        | 791  | 20 | 0.02462   | 0 |
| 0.0926772 | 1        | 791  | 20 | 0.02462   | 0 |
| 0.0542351 | 1        | 769  | 17 | 0.0260677 | 0 |
| 0.107971  | 1        | 936  | 20 | 0.0303226 | 0 |
| 0.0756126 | 1        | 648  | 19 | 0.0368373 | 0 |
| 0.0810588 | 1        | 689  | 20 | 0.0435197 | 0 |
| 0.0575294 | 1        | 489  | 14 | 0.0492135 | 0 |
| 0.0907059 | 1        | 771  | 22 | 0.0431666 | 0 |
| 0.110588  | 1        | 940  | 25 | 0.0241168 | 0 |
| 0.126118  | 1        | 1072 | 30 | 0.0141152 | 0 |
| 0.0690588 | 1        | 587  | 17 | 0.0493459 | 0 |
| 0.0430976 | 1        | 704  | 20 | 0.0437934 | 0 |
| 0.0729412 | 1        | 620  | 18 | 0.0482866 | 0 |
| 0.0778823 | 1        | 662  | 18 | 0.0430077 | 0 |
| 0.0731765 | 1        | 622  | 16 | 0.0350983 | 0 |
| 0.0252939 | 1        | 596  | 17 | 0.0469271 | 0 |
| 0.0720985 | 1        | 615  | 14 | 0.0463798 | 0 |

|           |          |      |    |            |   |
|-----------|----------|------|----|------------|---|
| 0.0632979 | 1        | 590  | 10 | 0.0498402  | 0 |
| 0.0694967 | 1        | 591  | 15 | 0.0498932  | 0 |
| 0.0905882 | 1        | 770  | 20 | 0.0254056  | 0 |
| 0.0479938 | 1        | 561  | 14 | 0.0496284  | 0 |
| 0.124471  | 1        | 1058 | 29 | 0.0144948  | 0 |
| 0.0711765 | 1        | 605  | 17 | 0.0240197  | 0 |
| 0.0904706 | 1        | 769  | 22 | 0.0251496  | 0 |
| 0.0824706 | 1        | 701  | 19 | 0.025591   | 0 |
| 0.0698166 | 1        | 594  | 15 | 0.0491517  | 0 |
| 0.114245  | 1        | 972  | 27 | 0.0172313  | 0 |
| 0.083644  | 1        | 718  | 16 | 0.0261118  | 0 |
| 0.0689655 | 1        | 592  | 17 | 0.0455059  | 0 |
| 0.0689655 | 1        | 592  | 17 | 0.0460885  | 0 |
| 0.116135  | 1        | 994  | 25 | 0.00971911 | 0 |
| 0.0804706 | 1        | 684  | 17 | 0.0274889  | 0 |
| 0.0754118 | 1        | 641  | 17 | 0.0427782  | 0 |
| 0.0810588 | 1        | 689  | 18 | 0.0210536  | 0 |
| 0.0790834 | 1        | 673  | 19 | 0.0353984  | 0 |
| 0.109294  | 1        | 929  | 26 | 0.0278155  | 0 |
| 0.102824  | 1        | 874  | 15 | 0.0456913  | 0 |
| 0.0504555 | 1        | 731  | 15 | 0.0443671  | 0 |
| 0.0705882 | 1        | 600  | 13 | 0.0466358  | 0 |
| 0.0705633 | 1        | 600  | 13 | 0.0466358  | 0 |
| 0.0735037 | 1        | 716  | 18 | 0.0252114  | 0 |
| 0.122235  | 1        | 1039 | 29 | 0.0174255  | 0 |
| 0.112471  | 1        | 956  | 25 | 0.0263502  | 0 |
| 0.0801177 | 1        | 681  | 19 | 0.0408626  | 0 |
| 0.0718824 | 1        | 611  | 12 | 0.0455853  | 0 |
| 0.0729412 | 1        | 620  | 17 | 0.0470507  | 0 |
| 0.0702353 | 1        | 597  | 17 | 0.0278597  | 0 |
| 0.1       | 1        | 850  | 20 | 0.0436963  | 0 |
| 0.0711765 | 1        | 605  | 14 | 0.0313642  | 0 |
| 0.0822159 | 1        | 699  | 11 | 0.00890698 | 0 |
| 0.103266  | 1        | 879  | 24 | 0.0328914  | 0 |
| 0.119882  | 1        | 1019 | 26 | 0.0337212  | 0 |
| 0.161294  | 1        | 1371 | 36 | 0.0489928  | 0 |
| 0.0811765 | 1        | 690  | 20 | 0.0473067  | 0 |
| 0.0595199 | 1        | 915  | 25 | 0.0351336  | 0 |
| 0.0714034 | 1        | 607  | 12 | 0.0420985  | 0 |
| 0.0407436 | 1        | 572  | 13 | 0.0246553  | 0 |
| 0.0685882 | 1        | 583  | 16 | 0.049902   | 0 |
| 0.0872941 | 1        | 742  | 21 | 0.0358486  | 0 |
| 0.0694118 | 1        | 590  | 17 | 0.0347275  | 0 |
| 0.0776471 | 1        | 660  | 15 | 0.0495666  | 0 |
| 0.0877647 | 1        | 746  | 21 | 0.0241433  | 0 |
| 0.0685908 | 0.986555 | 595  | 17 | 0.0460179  | 0 |
| 0.0472178 | 1        | 779  | 21 | 0.0330061  | 0 |

|           |          |      |    |           |   |
|-----------|----------|------|----|-----------|---|
| 0.0682266 | 1        | 589  | 17 | 0.0452499 | 0 |
| 0.0590913 | 1        | 610  | 16 | 0.0413834 | 0 |
| 0.0603079 | 0.459031 | 1135 | 26 | 0.013206  | 0 |
| 0.084     | 1        | 714  | 20 | 0.0212479 | 0 |
| 0.0708235 | 1        | 602  | 17 | 0.0307551 | 0 |
| 0.0473656 | 1        | 792  | 19 | 0.0466447 | 0 |
| 0.0712294 | 1        | 613  | 14 | 0.0384439 | 0 |
| 0.135529  | 1        | 1152 | 23 | 0.0317791 | 0 |
| 0.0582353 | 1        | 495  | 14 | 0.0438993 | 0 |
| 0.0962353 | 1        | 818  | 23 | 0.0346216 | 0 |
| 0.0777647 | 1        | 661  | 16 | 0.0212655 | 0 |
| 0.076     | 1        | 646  | 18 | 0.0471655 | 0 |
| 0.0601592 | 1        | 514  | 15 | 0.039256  | 0 |
| 0.102941  | 1        | 875  | 24 | 0.0338977 | 0 |
| 0.0737647 | 1        | 627  | 11 | 0.0350188 | 0 |
| 0.0977647 | 1        | 831  | 24 | 0.0353366 | 0 |
| 0.0903481 | 1        | 776  | 22 | 0.0339418 | 0 |
| 0.101221  | 1        | 862  | 22 | 0.0249643 | 0 |
| 0.074     | 1        | 629  | 18 | 0.0479776 | 0 |
| 0.0761087 | 1        | 647  | 18 | 0.0494518 | 0 |
| 0.102353  | 1        | 870  | 24 | 0.0350276 | 0 |
| 0.0791765 | 1        | 673  | 19 | 0.0332621 | 0 |
| 0.0814103 | 1        | 695  | 19 | 0.0494077 | 0 |
| 0.0752764 | 1        | 640  | 18 | 0.0391148 | 0 |
| 0.111765  | 1        | 950  | 27 | 0.029175  | 0 |
| 0.076     | 1        | 646  | 16 | 0.0490016 | 0 |
| 0.0697401 | 1        | 593  | 11 | 0.0465652 | 0 |
| 0.0777244 | 1        | 664  | 15 | 0.0362723 | 0 |
| 0.0720668 | 1        | 621  | 16 | 0.0429901 | 0 |
| 0.10153   | 1        | 876  | 25 | 0.034957  | 0 |
| 0.0669912 | 1        | 578  | 14 | 0.0448174 | 0 |
| 0.058515  | 1        | 714  | 20 | 0.0362547 | 0 |
| 0.0601541 | 1        | 734  | 20 | 0.0311965 | 0 |
| 0.0848235 | 1        | 721  | 20 | 0.0348864 | 0 |
| 0.0750588 | 1        | 638  | 14 | 0.0422574 | 0 |
| 0.0690588 | 1        | 587  | 13 | 0.0367843 | 0 |
| 0.0691765 | 1        | 588  | 16 | 0.0250437 | 0 |
| 0.0689937 | 1        | 591  | 16 | 0.0493282 | 0 |
| 0.0699613 | 1        | 596  | 15 | 0.0492399 | 0 |
| 0.0880385 | 1        | 750  | 20 | 0.0221041 | 0 |
| 0.0926636 | 1        | 797  | 19 | 0.0466358 | 0 |
| 0.0656997 | 1        | 616  | 15 | 0.032706  | 0 |
| 0.0890588 | 1        | 757  | 19 | 0.0335005 | 0 |
| 0.0735294 | 1        | 625  | 11 | 0.0405184 | 0 |
| 0.111839  | 1        | 956  | 26 | 0.0247789 | 0 |
| 0.0767062 | 1        | 653  | 19 | 0.0469448 | 0 |
| 0.0856711 | 1        | 736  | 16 | 0.024876  | 0 |

|           |          |      |    |           |   |
|-----------|----------|------|----|-----------|---|
| 0.052     | 1        | 442  | 13 | 0.0363871 | 0 |
| 0.0675367 | 1        | 1211 | 33 | 0.0111933 | 0 |
| 0.0656958 | 1        | 609  | 14 | 0.027895  | 0 |
| 0.0691471 | 1        | 591  | 17 | 0.0492223 | 0 |
| 0.0429293 | 1        | 612  | 17 | 0.0449674 | 0 |
| 0.109882  | 1        | 934  | 24 | 0.0280627 | 0 |
| 0.0827059 | 1        | 703  | 19 | 0.0481542 | 0 |
| 0.0794169 | 1        | 681  | 19 | 0.0294486 | 0 |
| 0.0680546 | 1        | 608  | 17 | 0.04284   | 0 |
| 0.0668235 | 1        | 568  | 16 | 0.0128794 | 0 |
| 0.030135  | 1        | 587  | 17 | 0.0483925 | 0 |
| 0.0478464 | 1        | 932  | 26 | 0.047598  | 0 |
| 0.0804611 | 1        | 705  | 20 | 0.0250349 | 0 |
| 0.0823529 | 1        | 700  | 20 | 0.0338977 | 0 |
| 0.04527   | 1        | 669  | 19 | 0.03772   | 0 |
| 0.0386429 | 1        | 631  | 18 | 0.0401211 | 0 |
| 0.074022  | 1        | 632  | 14 | 0.0218128 | 0 |
| 0.0687507 | 1        | 585  | 16 | 0.0472184 | 0 |
| 0.0609092 | 1        | 615  | 17 | 0.0496372 | 0 |
| 0.0702353 | 1        | 597  | 17 | 0.0456736 | 0 |
| 0.0709412 | 1        | 603  | 17 | 0.0461944 | 0 |
| 0.0485882 | 1        | 413  | 10 | 0.0272594 | 0 |
| 0.0890068 | 1        | 872  | 24 | 0.0140446 | 0 |
| 0.102588  | 1        | 872  | 24 | 0.0140446 | 0 |
| 0.0990063 | 1        | 1076 | 29 | 0.0210801 | 0 |
| 0.119066  | 1        | 1056 | 30 | 0.0235607 | 0 |
| 0.0702447 | 1        | 623  | 15 | 0.0488869 | 0 |
| 0.104771  | 0.997773 | 898  | 16 | 0.0298724 | 0 |
| 0.0975663 | 1        | 898  | 16 | 0.0298724 | 0 |
| 0.0727315 | 1        | 622  | 15 | 0.0193676 | 0 |
| 0.0675793 | 1        | 622  | 15 | 0.0193676 | 0 |
| 0.0724977 | 1        | 620  | 13 | 0.0485602 | 0 |
| 0.067362  | 1        | 620  | 13 | 0.0485602 | 0 |
| 0.112588  | 1        | 957  | 22 | 0.0444907 | 0 |
| 0.0628235 | 1        | 534  | 15 | 0.0434844 | 0 |
| 0.0962353 | 1        | 818  | 19 | 0.0188997 | 0 |
| 0.0728235 | 1        | 619  | 18 | 0.0479158 | 0 |
| 0.0911765 | 1        | 775  | 16 | 0.0484808 | 0 |
| 0.0847059 | 1        | 720  | 22 | 0.0172313 | 0 |
| 0.0673227 | 1        | 602  | 17 | 0.0462298 | 0 |
| 0.0534556 | 1        | 478  | 14 | 0.0416836 | 0 |
| 0.0567762 | 1        | 646  | 14 | 0.0202857 | 0 |
| 0.0567112 | 1        | 488  | 13 | 0.0461944 | 0 |
| 0.0765882 | 1        | 651  | 17 | 0.0404566 | 0 |
| 0.0870588 | 1        | 740  | 21 | 0.0320439 | 0 |
| 0.0951765 | 1        | 809  | 23 | 0.0227309 | 0 |
| 0.100588  | 1        | 855  | 23 | 0.0428488 | 0 |

|           |          |      |    |           |   |
|-----------|----------|------|----|-----------|---|
| 0.0841457 | 1        | 820  | 23 | 0.032653  | 0 |
| 0.0785882 | 1        | 668  | 19 | 0.0406419 | 0 |
| 0.0758824 | 1        | 645  | 17 | 0.033677  | 0 |
| 0.0438824 | 1        | 373  | 11 | 0.0444289 | 0 |
| 0.0420424 | 1        | 373  | 11 | 0.0444289 | 0 |
| 0.0750588 | 1        | 638  | 18 | 0.0499197 | 0 |
| 0.0716463 | 1        | 611  | 17 | 0.0483925 | 0 |
| 0.07      | 1        | 595  | 17 | 0.0464328 | 0 |
| 0.0726674 | 1        | 993  | 26 | 0.030605  | 0 |
| 0.0522353 | 1        | 444  | 13 | 0.0454618 | 0 |
| 0.140471  | 1        | 1194 | 24 | 0.0347893 | 0 |
| 0.0808765 | 1        | 919  | 23 | 0.0338977 | 0 |
| 0.0296336 | 0.303591 | 919  | 23 | 0.0338977 | 0 |
| 0.0686309 | 1        | 587  | 17 | 0.0452676 | 0 |
| 0.0690588 | 1        | 587  | 17 | 0.0452676 | 0 |
| 0.0604886 | 1        | 515  | 15 | 0.0210183 | 0 |
| 0.123882  | 1        | 1053 | 23 | 0.0241786 | 0 |
| 0.0914499 | 1        | 784  | 18 | 0.0335623 | 0 |
| 0.0242787 | 0.183024 | 1131 | 29 | 0.0143094 | 0 |
| 0.107571  | 1        | 1131 | 29 | 0.0143094 | 0 |
| 0.0853274 | 1        | 731  | 14 | 0.033271  | 0 |
| 0.12236   | 1        | 1043 | 27 | 0.0365813 | 0 |
| 0.0615891 | 1        | 524  | 11 | 0.049902  | 0 |
| 0.0460413 | 1        | 617  | 13 | 0.0319027 | 0 |
| 0.128214  | 1        | 1137 | 20 | 0.0326265 | 0 |
| 0.0697429 | 1        | 594  | 17 | 0.0450734 | 0 |
| 0.104118  | 1        | 885  | 22 | 0.0414894 | 0 |
| 0.104706  | 1        | 890  | 25 | 0.02462   | 0 |
| 0.0742353 | 1        | 631  | 18 | 0.0299341 | 0 |
| 0.0576905 | 1        | 605  | 15 | 0.0384351 | 0 |
| 0.0725882 | 1        | 617  | 17 | 0.0333328 | 0 |
| 0.0694949 | 1        | 593  | 17 | 0.0404654 | 0 |
| 0.0941176 | 1        | 800  | 17 | 0.0228898 | 0 |
| 0.106073  | 1        | 903  | 19 | 0.0462474 | 0 |
| 0.0317631 | 1        | 648  | 13 | 0.0447026 | 0 |
| 0.0776471 | 1        | 660  | 19 | 0.0375347 | 0 |
| 0.106487  | 1        | 911  | 20 | 0.0316114 | 0 |
| 0.121541  | 1        | 1041 | 26 | 0.0187762 | 0 |
| 0.0602173 | 1        | 643  | 13 | 0.0326089 | 0 |
| 0.0932941 | 1        | 793  | 20 | 0.0357074 | 0 |
| 0.121957  | 1        | 1037 | 29 | 0.0182906 | 0 |
| 0.0751765 | 1        | 639  | 18 | 0.0489663 | 0 |
| 0.0587247 | 1        | 769  | 22 | 0.035672  | 0 |
| 0.0455899 | 1        | 597  | 17 | 0.044888  | 0 |
| 0.0893277 | 1        | 760  | 22 | 0.0488515 | 0 |
| 0.110966  | 1        | 1017 | 27 | 0.0136738 | 0 |
| 0.0566809 | 1        | 638  | 18 | 0.0308522 | 0 |

|           |          |      |    |           |   |
|-----------|----------|------|----|-----------|---|
| 0.0799156 | 1        | 682  | 18 | 0.0469889 | 0 |
| 0.0706324 | 1        | 602  | 17 | 0.0485602 | 0 |
| 0.0694314 | 1        | 591  | 16 | 0.0315584 | 0 |
| 0.0972603 | 1        | 852  | 19 | 0.0348864 | 0 |
| 0.068459  | 1        | 713  | 20 | 0.0346834 | 0 |
| 0.0649064 | 1        | 676  | 15 | 0.0339418 | 0 |
| 0.101719  | 1        | 870  | 24 | 0.029069  | 0 |
| 0.0366011 | 1        | 594  | 11 | 0.0401211 | 0 |
| 0.0415294 | 1        | 353  | 10 | 0.0466976 | 0 |
| 0.0722353 | 1        | 614  | 17 | 0.0327678 | 0 |
| 0.117523  | 1        | 1002 | 22 | 0.0176551 | 0 |
| 0.118353  | 1        | 1006 | 27 | 0.0229074 | 0 |
| 0.0771622 | 1        | 819  | 16 | 0.0136032 | 0 |
| 0.0847318 | 1        | 722  | 15 | 0.0272771 | 0 |
| 0.0780608 | 1        | 665  | 19 | 0.0404919 | 0 |
| 0.0643529 | 1        | 547  | 11 | 0.0450204 | 0 |
| 0.0712941 | 1        | 606  | 17 | 0.0463004 | 0 |
| 0.0903961 | 1        | 785  | 22 | 0.0421161 | 0 |
| 0.0847081 | 1        | 724  | 20 | 0.0235077 | 0 |
| 0.0297839 | 1        | 718  | 20 | 0.0329708 | 0 |
| 0.135529  | 1        | 1152 | 29 | 0.012438  | 0 |
| 0.0690588 | 1        | 587  | 16 | 0.0467418 | 0 |
| 0.121059  | 1        | 1029 | 27 | 0.0250437 | 0 |
| 0.057445  | 1        | 554  | 16 | 0.0345951 | 0 |
| 0.0851934 | 1        | 729  | 20 | 0.0307463 | 0 |
| 0.0710094 | 1        | 605  | 11 | 0.0471213 | 0 |
| 0.0720636 | 1        | 616  | 16 | 0.0499815 | 0 |
| 0.0839802 | 1        | 714  | 13 | 0.033165  | 0 |
| 0.0743529 | 1        | 632  | 18 | 0.0393355 | 0 |
| 0.0600894 | 1        | 511  | 14 | 0.0491517 | 0 |
| 0.0815713 | 1        | 706  | 20 | 0.0464151 | 0 |
| 0.0689775 | 1        | 597  | 17 | 0.0242227 | 0 |
| 0.0977585 | 1        | 833  | 23 | 0.0238167 | 0 |
| 0.0387806 | 1        | 603  | 17 | 0.048216  | 0 |
| 0.0802353 | 1        | 682  | 18 | 0.0393443 | 0 |
| 0.0777647 | 1        | 661  | 15 | 0.036546  | 0 |
| 0.0255487 | 0.528596 | 577  | 16 | 0.0349129 | 0 |
| 0.0809863 | 1        | 693  | 18 | 0.0451352 | 0 |
| 0.103464  | 1        | 887  | 24 | 0.0368373 | 0 |
| 0.0596304 | 1        | 513  | 14 | 0.0238078 | 0 |
| 0.106609  | 1        | 913  | 23 | 0.0153069 | 0 |
| 0.0566293 | 1        | 879  | 24 | 0.0249731 | 0 |
| 0.10234   | 1        | 879  | 24 | 0.0249731 | 0 |
| 0.0911748 | 1        | 780  | 22 | 0.0335269 | 0 |
| 0.0727667 | 1        | 637  | 16 | 0.0427341 | 0 |
| 0.102471  | 1        | 871  | 21 | 0.0239667 | 0 |
| 0.0954786 | 1        | 813  | 23 | 0.0368549 | 0 |



|           |          |      |    |            |   |
|-----------|----------|------|----|------------|---|
| 0.0970588 | 1        | 825  | 23 | 0.0294222  | 0 |
| 0.117778  | 1        | 1003 | 24 | 0.0171077  | 0 |
| 0.111529  | 1        | 948  | 27 | 0.0345863  | 0 |
| 0.0716471 | 1        | 609  | 11 | 0.0463798  | 0 |
| 0.0841176 | 1        | 715  | 16 | 0.0454618  | 0 |
| 0.0841176 | 1        | 715  | 20 | 0.042072   | 0 |
| 0.0718797 | 1        | 626  | 11 | 0.0445967  | 0 |
| 0.0783105 | 1        | 673  | 17 | 0.0402359  | 0 |
| 0.0704706 | 1        | 599  | 17 | 0.0453647  | 0 |
| 0.104118  | 1        | 885  | 24 | 0.0274801  | 0 |
| 0.0684538 | 0.607143 | 980  | 28 | 0.0237372  | 0 |
| 0.0583239 | 1        | 721  | 13 | 0.02462    | 0 |
| 0.0822353 | 0.629163 | 1111 | 31 | 0.0144418  | 0 |
| 0.0717647 | 1        | 610  | 16 | 0.0475539  | 0 |
| 0.0671765 | 0.67654  | 844  | 24 | 0.0333239  | 0 |
| 0.0668398 | 1        | 592  | 17 | 0.049496   | 0 |
| 0.0942353 | 1        | 801  | 19 | 0.0333239  | 0 |
| 0.100235  | 1        | 852  | 24 | 0.0244876  | 0 |
| 0.0418868 | 1        | 658  | 19 | 0.0427252  | 0 |
| 0.102776  | 1        | 881  | 25 | 0.0344274  | 0 |
| 0.105399  | 1        | 896  | 23 | 0.00616161 | 0 |
| 0.0519449 | 1        | 637  | 18 | 0.0385851  | 0 |
| 0.095409  | 1        | 1170 | 33 | 0.0127999  | 0 |
| 0.0225559 | 1        | 730  | 17 | 0.0496813  | 0 |
| 0.0192498 | 1        | 623  | 18 | 0.0472714  | 0 |
| 0.0729412 | 1        | 620  | 13 | 0.040333   | 0 |
| 0.109894  | 1        | 943  | 26 | 0.0473332  | 0 |
| 0.084489  | 1        | 725  | 21 | 0.0303667  | 0 |
| 0.0745444 | 1        | 634  | 16 | 0.0447291  | 0 |
| 0.0857344 | 1        | 729  | 18 | 0.024823   | 0 |
| 0.0778827 | 1        | 668  | 19 | 0.0309493  | 0 |
| 0.0808496 | 1        | 689  | 15 | 0.0328472  | 0 |
| 0.0824706 | 1        | 701  | 20 | 0.0176374  | 0 |
| 0.0761176 | 1        | 647  | 18 | 0.0410657  | 0 |
| 0.07807   | 1        | 665  | 19 | 0.0107166  | 0 |
| 0.0830397 | 1        | 707  | 20 | 0.0353101  | 0 |
| 0.129199  | 1        | 1100 | 26 | 0.0230928  | 0 |
| 0.0598781 | 1        | 511  | 15 | 0.0484543  | 0 |
| 0.0601176 | 1        | 511  | 15 | 0.0484543  | 0 |
| 0.100671  | 1        | 870  | 25 | 0.0482601  | 0 |
| 0.0440555 | 1        | 375  | 11 | 0.0351865  | 0 |
| 0.0709041 | 1        | 618  | 17 | 0.049443   | 0 |
| 0.103059  | 1        | 876  | 24 | 0.0206388  | 0 |
| 0.103379  | 1        | 881  | 23 | 0.0469536  | 0 |
| 0.0697511 | 1        | 594  | 17 | 0.0492311  | 0 |
| 0.0716329 | 1        | 626  | 16 | 0.0353366  | 0 |
| 0.056172  | 1        | 815  | 19 | 0.0470331  | 0 |

MAT-score on T(H3K14acWTC vs. control)

5.39328  
6.41186  
6.68837  
5.38374  
6.02077  
6.21201  
5.57332  
6.59355  
8.36124  
10.1408  
5.289  
6.50058  
5.36958  
5.522  
5.98352  
8.04208  
5.29053  
6.15817  
8.03978  
5.35469  
6.22014  
5.31391  
5.31391  
5.70316  
5.76356  
6.19684  
5.30805  
7.33556  
8.80678  
5.34513  
5.68911  
5.54518  
8.31557  
5.99169  
6.10733  
5.69406  
5.81566  
5.61127  
5.68103  
5.39984  
5.38198  
9.68108  
5.30564  
5.51948

5.90592  
5.87599  
5.43161  
5.34408  
7.45353  
6.14075  
5.36591  
7.07455  
7.0041  
5.41791  
5.50073  
5.9664  
5.43959  
5.36861  
5.41488  
8.29259  
7.59754  
6.42946  
5.36542  
5.37567  
5.37567  
7.34957  
5.52138  
5.36215  
5.91614  
8.04247  
6.06583  
5.39126  
8.29157  
5.28807  
7.22614  
8.06818  
5.44754  
5.42888  
5.42888  
6.08793  
5.67209  
5.44518  
6.47619  
6.75491  
5.42626  
7.10941  
6.06314  
5.72364  
6.6428  
7.63536  
7.48922

5.3521  
7.08398  
5.72716  
5.43705  
6.00015  
6.09363  
6.00283  
7.25556  
5.41419  
8.41298  
8.41298  
6.09994  
6.09994  
9.08389  
9.08389  
6.34185  
6.33029  
5.36557  
5.74986  
5.29465  
6.16588  
5.59096  
5.52709  
5.29419  
5.79775  
5.79775  
5.62596  
6.31036  
5.47834  
5.92906  
8.02673  
5.52945  
5.46607  
5.28861  
5.3178  
9.32318  
5.58455  
5.32468  
7.11655  
5.34853  
5.43698  
5.41577  
5.81444  
5.30701  
5.39847  
5.54654  
6.05929

6.4528  
5.57347  
5.41877  
6.03425  
6.29871  
6.29871  
6.03172  
5.29089  
5.58244  
5.52491  
5.52491  
7.63461  
6.74563  
5.3585  
5.44439  
5.33149  
5.62517  
5.53382  
5.54635  
6.58338  
9.56311  
5.48119  
6.22375  
5.32552  
9.16945  
5.45151  
6.03455  
5.44885  
5.37884  
9.54167  
6.24628  
5.69401  
5.85327  
5.48458  
5.48458  
5.40131  
6.36287  
5.42919  
8.07765  
5.35728  
5.5473  
10.3232  
10.3232  
5.45433  
6.04245  
5.30487  
6.47009

6.82797  
5.94636  
7.01822  
6.1265  
7.92512  
6.15415  
5.33208  
7.69897  
7.1409  
6.06918  
6.23335  
5.31492  
5.6668  
7.41878  
5.30079  
5.344  
5.3794  
5.88774  
5.36684  
5.61238  
5.39892  
6.08554  
6.726  
5.71536  
6.20364  
7.3424  
5.44185  
6.13636  
8.60641  
6.0535  
5.51085  
6.07696  
5.55763  
5.30763  
5.74646  
6.27351  
6.27351  
6.42535  
6.4541  
6.17331  
6.02913  
5.35876  
5.56459  
8.26268  
5.59758  
5.54297  
6.15676

5.60558  
5.28858  
5.52661  
6.0327  
8.84768  
5.59916  
5.41245  
5.41245  
6.39697  
5.47795  
6.40526  
9.57693  
6.01153  
6.37757  
5.82402  
5.80013  
5.37254  
5.37254  
5.84452  
5.35504  
6.45058  
5.60841  
5.60841  
7.14107  
5.38342  
5.50629  
7.27699  
7.67262  
6.08669  
14.4153  
5.33228  
5.35132  
6.15647  
6.2188  
5.76288  
5.39768  
5.85504  
6.15654  
5.5788  
13.9437  
6.82301  
7.50721  
6.71649  
7.33011  
5.3218  
5.3357  
6.43814

7.15414  
6.13544  
8.06406  
5.37998  
8.16973  
13.5137  
6.57135  
5.29492  
5.94971  
6.01531  
6.33004  
5.96288  
6.25483  
7.06611  
6.65641  
6.59786  
5.89084  
11.003  
5.38393  
5.41687  
6.17424  
6.07374  
5.48983  
5.46536  
5.59126  
13.223  
5.35291  
6.09917  
5.75215  
6.62148  
6.1454  
5.90657  
5.37672  
5.77188  
5.44829  
5.36325  
5.59503  
7.38073  
7.369  
6.05892  
7.19182  
5.69727  
6.18566  
6.09583  
6.26446  
6.05641  
5.47342



5.4099  
5.65689  
6.14559  
5.81369  
8.08937  
6.66003  
7.01453  
7.17344  
5.31219  
5.86231  
6.1538  
6.1538  
5.43121  
5.73357  
5.31173  
11.1331  
6.15942  
6.10059  
7.49918  
7.41912  
5.42844  
5.36631  
6.0761  
5.34094  
5.38474  
5.93343  
6.33067  
5.28844  
5.5192  
7.57414  
7.00296  
5.97775  
5.52106  
7.47801  
5.29541  
6.0781  
6.21538  
6.00937  
5.55034  
6.29571  
8.45573  
5.67849  
6.20416  
5.90167  
7.22353  
6.09702  
6.19622

5.29537  
6.02822  
6.38808  
7.19728  
5.57884  
5.39235  
7.54955  
5.66207  
6.17011  
5.63726  
6.07702  
10.0466  
10.0466  
5.33901  
5.73211  
5.5019  
7.04247  
6.01081  
6.32188  
6.97149  
6.97149  
6.1022  
5.38268  
7.18043  
6.06475  
6.11514  
5.59466  
7.32319  
10.4946  
5.85778  
5.67098  
5.4644  
6.14418  
5.36613  
5.61414  
5.61414  
5.51538  
5.47845  
5.31058  
7.68652  
6.62339  
6.04901  
6.70966  
5.50112  
8.23553  
8.23553  
5.73644

5.29778  
5.82497  
5.36825  
6.14849  
5.47211  
9.32402  
5.83969  
5.64336  
7.2717  
7.01165  
5.29605  
6.21009  
5.66847  
6.04465  
6.09214  
5.30939  
6.16827  
6.29532  
13.5048  
6.01352  
7.3074  
6.14332  
5.77492  
5.6009  
5.35744  
7.75985  
6.00142  
6.15988  
5.49998  
7.17394  
5.28885  
5.50747  
5.52407  
5.34164  
5.89849  
5.4498  
7.36354  
6.34239  
5.38145  
5.36127  
5.59963  
7.1983  
7.26637  
5.29226  
6.26456  
10.9984  
7.30362

5.30046  
5.30046  
6.40324  
6.03432  
6.03432  
5.85605  
11.7237  
7.49149  
10.5979  
6.37978  
5.42386  
5.30118  
10.2697  
5.57143  
5.57143  
9.40254  
8.24428  
6.17918  
6.14002  
5.29088  
5.39308  
5.37637  
5.42579  
6.46784  
6.05524  
5.38732  
6.10236  
5.81074  
8.4474  
6.30837  
5.621  
5.68935  
8.009  
6.02492  
5.45244  
5.56454  
5.67272  
7.32828  
7.66617  
8.38905  
6.06934  
7.0055  
6.5107  
5.60362  
6.33079  
7.59563  
7.30448

7.30448  
5.61297  
5.82898  
5.8253  
5.28878  
5.41104  
6.16661  
6.07029  
6.24412  
6.2228  
5.48318  
5.33879  
5.62428  
5.29841  
6.2072  
5.80063  
5.80453  
6.67278  
5.54739  
5.54739  
5.31328  
5.76759  
6.32874  
5.53166  
5.58251  
5.54372  
5.53873  
5.32857  
6.29213  
5.54639  
8.9197  
7.10533  
7.28185  
6.0944  
5.54349  
6.05697  
7.41891  
5.53563  
5.48344  
6.04648  
7.02962  
7.02962  
6.37371  
5.51476  
10.1984  
5.683  
5.56187

5.70317  
5.75869  
5.58912  
5.58912  
5.59134  
7.13255  
6.05041  
8.01097  
6.23618  
5.50738  
5.39218  
11.3784  
5.79471  
6.23161  
7.31966  
7.31966  
7.11019  
6.29713  
6.24253  
5.63667  
6.08559  
6.21573  
5.31861  
5.31399  
6.37732  
7.03017  
5.45198  
5.38902  
5.38845  
5.82483  
7.49632  
5.44537  
5.72822  
6.85575  
7.42392  
5.83869  
6.2166  
6.76461  
5.42166  
5.42166  
7.02267  
6.00282  
5.2944  
5.42315  
5.30214  
5.63643  
5.73271

5.32441  
6.22527  
5.59199  
6.28405  
8.4567  
6.52815  
6.04861  
5.54198  
7.10474  
5.61673  
5.31187  
5.3291  
5.3291  
5.38377  
5.57662  
7.00473  
10.8251  
5.52138  
5.45192  
6.25106  
5.32984  
6.09759  
8.55704  
5.54496  
5.53947  
7.17464  
6.16718  
6.48573  
5.43883  
6.08228  
8.33022  
8.00638  
5.62726  
8.75839  
6.04631  
7.90233  
7.31633  
8.30784  
8.05672  
8.10037  
6.06567  
6.72268  
5.56568  
6.14167  
5.4063  
5.28823  
7.02646

6.36868  
7.32696  
5.33559  
6.04211  
5.29222  
6.27765  
5.52845  
6.01286  
7.28499  
5.45703  
8.1143  
6.02196  
5.88246  
5.77578  
5.57749  
6.3078  
6.42232  
5.70267  
7.00563  
8.43489  
9.25152  
9.25152  
5.55428  
6.51811  
6.12297  
6.12297  
5.48028  
5.34347  
5.32395  
5.37929  
5.30435  
7.05686  
8.36108  
7.83407  
5.83699  
6.3927  
10.1724  
8.12232  
8.49052  
5.46261  
6.23563  
6.11845  
5.70232  
5.31185  
6.09122  
6.09062  
5.34225



7.26688  
5.43566  
5.52706  
15.0304  
5.43351  
6.1809  
7.1016  
5.33843  
5.35685  
6.16469  
5.40622  
6.19329  
6.34972  
6.34398  
5.51487  
5.65436  
5.3621  
6.05912  
8.60412  
5.57159  
6.2777  
5.94669  
6.44154  
5.90341  
7.2424  
5.42459  
5.34271  
6.39181  
5.53465  
5.64345  
6.01162  
5.94016  
5.98899  
7.23414  
8.58638  
5.67822  
8.39861  
6.13313  
6.63458  
7.73186  
5.4874  
7.363  
7.06526  
7.16898  
5.66527  
7.13529  
6.3024

5.51499  
5.52293  
5.44796  
6.04198  
5.37688  
5.37954  
7.62795  
5.61953  
6.23769  
6.29547  
5.99532  
5.55711  
5.91807  
6.13448  
6.00315  
8.83891  
10.3289  
5.34656  
7.76178  
5.36409  
6.52807  
7.40464  
6.97498  
5.37165  
6.63624  
6.63624  
5.59302  
5.29642  
6.34739  
6.30252  
5.29009  
11.149  
5.33689  
5.30636  
5.75641  
6.55039  
6.28971  
6.09477  
6.5686  
7.02965  
7.03391  
5.57234  
8.31243  
6.22663  
5.51313  
5.49694  
10.2966

7.74938  
7.74938  
7.56403  
5.4387  
7.06385  
5.78998  
6.25736  
5.3929  
10.3298  
7.1651  
6.97897  
5.37375  
6.93582  
7.37134  
5.35073  
5.76262  
8.14775  
10.2936  
6.04651  
5.37601  
7.31635  
6.1623  
6.1623  
11.6218  
5.63253  
5.63253  
5.32632  
5.53013  
7.19607  
5.51583  
6.15069  
6.20197  
8.75557  
5.55497  
7.48354  
5.32994  
7.0136  
5.76889  
7.52192  
5.31589  
5.6746  
9.00215  
9.00215  
7.11697  
12.4567  
8.08985  
6.35432

5.35805  
5.29643  
5.35252  
6.18989  
8.72634  
6.06819  
8.25109  
8.37363  
8.37363  
5.34584  
5.59643  
6.04806  
5.33961  
8.73704  
6.04643  
6.02263  
8.23238  
9.28528  
5.55969  
6.0946  
8.08219  
5.43539  
5.36154  
8.39832  
5.28897  
5.90239  
7.96092  
5.34538  
8.04628  
6.49472  
6.29301  
5.90387  
5.36566  
5.68994  
10.6827  
6.12607  
7.02125  
6.17709  
8.04604  
5.69049  
5.53265  
6.13257  
5.90691  
7.14028  
6.02734  
6.21333  
6.5196

8.14491  
5.40068  
5.30676  
6.36424  
6.03578  
6.03578  
7.10186  
5.36883  
6.30828  
5.33405  
7.10943  
5.46472  
5.46472  
5.3161  
5.39539  
6.09218  
6.09218  
5.60876  
6.06545  
5.36408  
5.31984  
5.67101  
5.55163  
5.64299  
7.20386  
8.02525  
5.32429  
7.06651  
5.54852  
7.15414  
5.84589  
6.1106  
6.8177  
6.35072  
5.49551  
5.62779  
7.47321  
6.40599  
6.31112  
5.30164  
5.64002  
6.00781  
6.54245  
6.17813  
5.44024  
5.94528  
7.03347

8.30534  
5.51753  
5.66183  
6.0751  
5.43423  
9.59013  
5.42058  
6.16377  
6.16377  
5.56978  
7.16195  
10.2896  
5.58728  
5.92081  
5.7014  
5.6006  
5.6006  
7.24132  
6.13413  
6.13333  
5.84131  
9.77032  
5.55857  
6.39402  
6.39402  
5.43388  
6.62323  
6.16455  
6.05351  
6.05351  
8.06806  
5.30343  
6.36778  
5.5567  
5.71064  
5.54492  
5.56572  
7.29073  
5.39384  
5.49847  
6.64676  
5.3483  
5.30207  
5.44578  
7.27301  
7.4898  
6.38806

5.67677  
6.40007  
6.22073  
5.56566  
5.51463  
5.34946  
6.13366  
5.68493  
7.13604  
5.46199  
6.40436  
5.86201  
5.76836  
7.51689  
5.51837  
5.4856  
5.43167  
6.02207  
6.25338  
5.39091  
5.89873  
7.21778  
8.28534  
5.32793  
5.5809  
10.1048  
6.01067  
6.7795  
6.2065  
6.75778  
6.09045  
7.00306  
7.00306  
9.88708  
6.22977  
5.5546  
7.21824  
6.10654  
6.12511  
6.50438  
7.56747  
5.51712  
7.08825  
5.42551  
7.33067  
6.24633  
5.71414

5.29853  
6.05771  
5.29988  
5.44298  
5.32126  
5.73641  
5.4508  
8.05291  
8.04837  
8.10962  
5.50957  
5.3327  
5.41726  
5.41726  
7.04059  
5.35046  
6.2109  
5.61207  
5.44912  
5.31672  
7.79518  
7.79518  
7.04558  
5.29086  
6.01245  
5.53912  
6.06396  
6.23554  
7.27253  
5.51156  
6.02892  
7.39357  
5.31429  
8.11746  
5.43887  
6.22312  
6.13201  
5.39899  
5.46253  
5.3568  
5.472  
5.30773  
5.41791  
5.34279  
5.36848  
5.48769  
6.86992



5.92824  
5.75006  
5.30219  
7.01461  
5.36198  
5.58487  
7.075  
8.30611  
6.77368  
6.3018  
8.67649  
10.5059  
7.13235  
7.13235  
6.24594  
7.2317  
7.23943  
7.62776  
7.18597  
6.17348  
5.43804  
5.81146  
5.45527  
6.09984  
5.34325  
7.32207  
7.32207  
5.65007  
10.7412  
5.33783  
6.16453  
5.53889  
7.1428  
5.67743  
6.24722  
5.55136  
6.84123  
6.21524  
7.18301  
5.5813  
5.61475  
6.01771  
6.01771  
5.83175  
5.37754  
5.31108  
6.01033

5.46731  
5.30081  
5.44491  
6.51035  
5.87128  
6.11524  
6.28655  
5.5233  
5.29984  
5.49591  
6.10615  
9.47936  
6.03391  
5.54566  
5.34369  
6.33487  
5.33438  
5.64458  
5.49621  
6.10299  
8.22895  
5.79588  
5.74095  
5.3485  
7.21927  
5.36489  
6.07208  
10.4329  
10.4329  
8.10903  
8.10903  
5.61289  
5.61289  
5.78089  
5.66418  
6.55682  
6.04492  
8.5365  
5.37922  
5.43256  
6.09186  
6.18052  
5.36755  
5.38324  
7.02718  
6.22143  
5.64775

5.48085  
6.74913  
9.33777  
6.15126  
6.67712  
5.36906  
5.67769  
5.73477  
7.02814  
8.05008  
6.92684  
6.92684  
5.76078  
5.58195  
6.19962  
5.32873  
5.42037  
5.42037  
5.45157  
5.41611  
5.63402  
5.43917  
5.61876  
6.19324  
7.17267  
5.588  
6.37668  
6.1482  
6.1482  
7.02367  
6.22338  
5.75805  
6.28432  
11.432  
5.44253  
5.32193  
5.48684  
5.49768  
5.76281  
5.66012  
5.33804  
6.20938  
5.31459  
7.77458  
6.28824  
10.6522  
6.11395

6.11395  
6.25782  
7.12831  
6.08399  
7.099  
5.69925  
6.42276  
6.42276  
5.6068  
5.42762  
5.40944  
6.27641  
5.51607  
7.53412  
5.39284  
5.44441  
5.66829  
5.2925  
6.06213  
6.21555  
5.91976  
9.19815  
5.40938  
5.44529  
5.42314  
8.52205  
5.44342  
5.30233  
7.03754  
6.19152  
7.26137  
12.0449  
6.05611  
5.39368  
5.92224  
5.32521  
5.3658  
6.58975  
5.39584  
5.65109  
6.37916  
6.04095  
6.01934  
5.33395  
5.4435  
5.74221  
6.13102

5.49646  
6.18118  
5.45228  
5.37511  
6.03741  
5.96333  
5.65182  
5.47313  
5.54682  
5.58321  
6.41408  
5.81287  
6.37285  
8.07814  
6.17365  
5.32279  
6.20289  
6.91482  
6.05264  
5.6569  
5.70764  
5.37812  
7.00324  
5.66558  
8.33772  
5.83797  
5.38185  
5.33254  
5.39651  
5.59825  
5.35963  
5.40019  
7.6341  
5.30307  
5.34292  
5.35859  
6.2054  
5.73713  
5.43989  
7.29616  
5.40679  
6.39965  
5.79718  
6.66145  
6.67333  
5.44803  
6.40067

7.26568  
6.1629  
10.1595  
5.65909  
6.5165  
5.39197  
8.09343  
6.0987  
5.99112  
5.67631  
6.02113  
6.29259  
5.57638  
10.3602  
6.5636  
6.32518  
6.36324  
5.82783  
6.13053  
5.50769  
5.86753  
7.62464  
6.07617  
7.01828  
5.63699  
5.50532  
5.57626  
7.70127  
7.70127  
9.31744  
7.20799  
5.43958  
8.66704  
6.12741  
5.80861  
6.00781  
6.17608  
5.85723  
7.02129  
5.34805  
5.5088  
5.51954  
5.51954  
6.56844  
5.59613  
5.45049  
5.53687

5.64547  
6.99526  
5.66466  
5.33421  
7.08814  
6.71438  
5.53236  
5.33696  
6.30658  
5.40117  
5.50626  
8.05277  
5.53924  
6.21114  
6.28559  
8.52848  
6.47699  
5.40169  
10.0682  
7.21673  
6.08507  
5.74317  
6.05048  
6.24001  
5.45002  
6.91353  
8.15773  
6.0053  
8.37853  
5.28785  
10.1198  
8.27187  
6.09977  
6.45344  
5.45712  
5.38933  
5.76737  
5.45098  
5.71924  
9.1045  
6.29836  
8.24372  
5.92869  
5.55344  
6.0276  
5.60069  
6.0391

6.51763  
5.68527  
6.30696  
6.15243  
5.80228  
8.30997  
5.39177  
6.77456  
6.60394  
5.39535  
5.45475  
7.13837  
6.35186  
5.97569  
5.64147  
6.26194  
8.17135  
6.37406  
6.49268  
5.63546  
6.07873  
5.38959  
5.32054  
8.29563  
6.59022  
5.65889  
5.65889  
5.46572  
5.54476  
8.44518  
6.38772  
5.73947  
5.73947  
6.05065  
9.20294  
5.36392  
6.00385  
5.29427  
5.63868  
6.26264  
5.57797  
5.62  
5.59748  
5.45309  
5.33591  
6.37836  
5.46513



5.48165  
8.13126  
5.38591  
8.11618  
8.4695  
5.90532  
6.70171  
6.60819  
5.73728  
5.68523  
5.39014  
5.7709  
5.7709  
8.33121  
5.3109  
5.6956  
5.46253  
6.18713  
5.35195  
5.71508  
5.72856  
5.68715  
5.32442  
6.19176  
5.29423  
6.30901  
6.42675  
7.90511  
7.56872  
5.4157  
6.38814  
6.46203  
6.15095  
6.24651  
7.66403  
5.97047  
6.34801  
6.04489  
5.53253  
7.97617  
6.10545  
6.83028  
5.36922  
5.31744  
7.15575  
5.38203  
6.06399

7.12652  
5.42785  
7.5688  
5.51008  
5.65024  
5.90559  
10.502  
6.56044  
5.42835  
6.33114  
5.50922  
5.30997  
6.12318  
5.59648  
5.59648  
6.08773  
6.08773  
6.02991  
5.50999  
5.83138  
5.29218  
6.15393  
5.46993  
11.1546  
7.50255  
6.06159  
6.27552  
5.56555  
5.78414  
5.40929  
6.19154  
9.59127  
5.37532  
5.37586  
5.31174  
6.00574  
5.48702  
5.37626  
5.28841  
5.69383  
6.51903  
5.53473  
5.54782  
5.47629  
8.0101  
5.59875  
5.40928

8.11081  
6.21669  
9.99412  
7.04111  
7.04111  
7.36195  
5.5565  
8.96486  
5.51283  
6.09072  
7.20368  
7.40687  
6.09458  
6.09039  
6.05424  
5.61102  
5.3577  
5.38505  
5.36777  
6.35309  
6.41334  
8.2667  
8.26194  
7.22682  
5.35255  
5.39347  
6.16622  
5.39465  
5.34119  
5.34119  
10.3239  
5.41653  
6.09053  
6.67845  
6.31182  
5.4322  
5.99569  
6.42496  
7.55749  
6.11179  
5.43132  
6.1203  
5.60221  
11.2228  
5.58973  
11.8768  
5.43793

5.52032  
9.80978  
6.29948  
8.21746  
5.56124  
5.36073  
5.50533  
5.66283  
5.40204  
7.14644  
5.45597  
6.41927  
6.13884  
5.60347  
5.63891  
7.19221  
7.0398  
6.51525  
9.00862  
6.0093  
6.24614  
5.33169  
6.21069  
5.47173  
6.25538  
5.46664  
5.38094  
7.1882  
6.19793  
6.09012  
5.37441  
7.06733  
5.45569  
5.70407  
5.47339  
8.08048  
7.04296  
7.04296  
6.11168  
8.26387  
5.54461  
5.34937  
7.31976  
6.0344  
10.3134  
6.98131  
6.08439

5.55465  
5.65366  
7.48189  
6.37902  
5.32249  
5.57487  
6.54248  
6.02412  
6.33155  
6.28713  
7.06883  
7.42817  
6.12894  
5.4055  
5.82947  
7.29679  
7.00474  
6.20869  
7.26954  
5.45379  
6.04178  
5.68263  
7.66906  
7.13583  
5.33233  
6.08132  
7.89125  
5.3273  
6.09632  
6.57106  
5.43283  
5.43283  
5.43559  
6.29094  
5.49232  
7.45176  
6.4421  
6.19779  
7.00342  
9.73888  
7.34863  
6.10315  
6.24243  
7.94101  
5.3396  
5.66884  
5.47922

6.45929  
5.40766  
8.29796  
5.4146  
6.08028  
6.27259  
6.29385  
5.42247  
8.79917  
5.66579  
5.53719  
5.36906  
5.41324  
7.00572  
8.30975  
5.33621  
5.33129  
10.0882  
5.31198  
5.28824  
5.5874  
5.88861  
5.77548  
8.28764  
7.42079  
5.42782  
5.292  
6.313  
5.3439  
6.08747  
6.29901  
8.20033  
5.96374  
5.70812  
5.77777  
5.76398  
6.14085  
6.54743  
5.32255  
5.85125  
5.37648  
5.98006  
6.29851  
6.29851  
5.96325  
5.3975  
6.37073

6.68593  
6.00412  
5.28791  
6.59218  
5.90486  
7.04384  
6.43394  
6.39924  
5.31934  
7.09869  
7.09869  
7.65528  
5.64584  
5.30031  
11.5254  
6.01901  
5.56053  
6.49623  
6.19719  
5.85454  
5.56485  
8.88368  
5.36198  
8.02787  
5.31458  
6.46752  
6.06936  
11.1486  
6.24423  
6.43123  
5.51844  
6.18454  
5.30387  
9.85022  
7.12565  
7.49402  
6.6627  
7.25167  
6.11926  
6.09763  
6.09763  
7.77663  
6.03911  
5.44089  
5.81483  
7.45922  
7.05241

5.30184  
6.55287  
6.36347  
6.74741  
7.64799  
5.34071  
9.00589  
6.15251  
5.34401  
5.85081  
6.12811  
6.26877  
6.00316  
6.55296  
6.14712  
6.17733  
5.38982  
5.4169  
6.68851  
5.39277  
5.69466  
6.39877  
10.1304  
5.35312  
5.80379  
5.35952  
8.55251  
5.76002  
5.29607  
5.29339  
8.09307  
6.09395  
9.107  
5.32287  
6.32257  
6.32257  
6.20198  
6.20198  
6.30137  
5.46843  
5.38511  
7.48301  
5.52281  
7.39908  
6.36375  
10.0354  
5.84367



5.84367  
7.44163  
5.36701  
7.66409  
8.95151  
5.32359  
5.39455  
6.10287  
5.65768  
5.30688  
6.01326  
5.36496  
6.01784  
5.46981  
5.76188  
5.67987  
5.54546  
7.35792  
6.64948  
6.63979  
5.31321  
5.51528  
6.18454  
5.37139  
5.72689  
9.51532  
5.45689  
5.35445  
6.37267  
6.16329  
5.61824  
6.15734  
5.47853  
5.81047  
6.05637  
6.2763  
7.31278  
8.01319  
5.30323  
7.27585  
6.15898  
9.34124  
6.13854  
5.50705  
7.16233  
5.98861  
6.55364

5.44134  
6.16347  
7.73439  
5.58373  
6.06214  
5.67114  
5.61931  
5.42529  
6.55709  
6.31405  
6.1857  
5.9726  
6.24799  
5.7139  
5.47154  
5.47154  
6.62502  
10.0416  
7.65446  
6.28209  
7.64073  
9.09256  
5.35886  
6.09858  
6.193  
6.10807  
6.38312  
5.83937  
5.6496  
5.57972  
5.36336  
6.0986  
5.50656  
5.42963  
5.52054  
5.3327  
5.49808  
8.05346  
6.33497  
6.02918  
5.36413  
6.15306  
6.21598  
6.06261  
5.47175  
7.21338  
7.21338

5.56873  
6.57517  
6.61091  
5.40329  
5.4782  
5.59413  
6.07712  
6.14077  
5.80656  
5.80656  
8.9186  
7.1954  
5.70046  
5.82803  
6.43215  
5.33498  
6.25799  
5.40599  
5.32606  
5.33249  
5.54867  
6.26443  
6.08281  
5.50494  
7.09305  
6.20272  
5.59478  
5.40058  
5.36164  
7.00216  
7.10781  
7.10781  
6.912  
6.49578  
6.00318  
5.59671  
5.32205  
5.61257  
7.18305  
9.11802  
5.31361  
5.58658  
5.36089  
5.62145  
6.11274  
5.42768  
5.45504

5.29509  
5.29163  
7.00427  
5.30348  
9.00062  
7.19333  
7.03684  
6.97552  
5.32417  
8.33418  
6.90377  
5.49254  
5.46852  
10.7793  
6.75408  
5.63268  
7.65336  
6.09724  
6.72724  
5.4843  
5.56462  
5.44171  
5.44171  
7.03219  
8.29898  
6.88024  
5.74167  
5.48809  
5.42097  
6.72292  
5.58973  
6.40617  
11.2949  
6.27153  
6.20542  
5.33022  
5.41206  
6.11082  
5.67505  
7.09963  
5.2906  
6.07052  
6.14087  
5.3071  
7.1806  
5.47094  
6.26089

5.5062  
5.71899  
9.38977  
7.61524  
6.45937  
5.44087  
5.89049  
6.3629  
5.58178  
6.14781  
7.60896  
5.41733  
5.84413  
6.19493  
6.11767  
6.10214  
6.18999  
7.06698  
5.37517  
5.31083  
6.11729  
6.24108  
5.31248  
5.85543  
6.607  
5.3292  
5.44531  
6.03999  
5.62214  
6.12019  
5.53563  
6.04212  
6.41911  
6.12775  
5.67016  
6.00571  
7.05249  
5.3153  
5.32055  
7.47745  
5.44182  
6.28978  
6.22585  
5.7608  
7.08927  
5.42752  
7.08169

6.0327  
10.1207  
6.72087  
5.32162  
5.52282  
6.70902  
5.36673  
6.58513  
5.62989  
9.49179  
5.355  
5.39181  
7.05372  
6.19424  
5.94436  
5.79158  
7.51989  
5.41529  
5.30329  
5.48479  
5.46467  
6.78892  
9.14983  
9.14983  
7.64587  
7.24845  
5.33648  
6.54522  
6.54522  
7.92093  
7.92093  
5.34779  
5.34779  
5.55259  
5.59756  
8.0074  
5.37829  
5.35176  
8.33475  
5.4627  
5.69932  
7.76609  
5.46517  
5.76558  
6.33823  
7.37492  
5.62956

6.29638  
5.75337  
6.20816  
5.55959  
5.55959  
5.29014  
5.3557  
5.45076  
6.47426  
5.49415  
6.13553  
6.19455  
6.19455  
5.50531  
5.50531  
7.66004  
7.17277  
6.21677  
9.05025  
9.05025  
6.24076  
6.01913  
5.29068  
6.35044  
6.2971  
5.51732  
5.71145  
7.10711  
6.53878  
5.89151  
6.237  
5.76403  
7.34936  
5.46084  
5.5414  
5.95586  
6.37247  
8.02215  
6.29953  
6.07711  
8.10569  
5.3314  
6.07902  
5.53079  
5.33863  
9.25472  
6.45334

5.42507  
5.34772  
6.38066  
6.12832  
6.14502  
6.18945  
6.61709  
5.7912  
5.43625  
6.28455  
8.25111  
7.34535  
9.27823  
6.78715  
5.76304  
5.52083  
5.45863  
5.67452  
7.25802  
6.26602  
9.65847  
5.43461  
7.05203  
6.14878  
6.46077  
5.41858  
5.28819  
6.24677  
5.84042  
5.32382  
5.45244  
7.16173  
7.2271  
5.36407  
5.83905  
6.02109  
6.12368  
5.51424  
6.00308  
7.22733  
8.7678  
7.06372  
7.06372  
6.22331  
5.63542  
7.19528  
6.0025



6.59017  
8.36457  
6.14911  
5.45537  
5.49443  
5.67726  
5.54683  
5.78213  
5.49822  
6.75551  
7.23175  
7.10887  
9.01859  
5.39781  
6.23849  
5.30942  
6.23761  
7.13324  
5.6379  
6.1586  
13.3806  
5.8819  
9.53621  
5.30146  
5.41381  
5.77439  
5.41172  
6.49318  
5.54066  
7.08612  
6.44558  
6.27808  
8.25116  
5.73031  
10.3188  
6.10339  
7.32129  
5.35254  
5.35254  
5.36204  
6.10962  
5.31152  
7.71524  
5.42655  
5.32149  
6.1019  
5.42163

## Gene list WT H3K14ac High Fat Diet

| chromoson | feature sta | feature enc | feature  | chromoson | region star | region end | gene overl | region over |
|-----------|-------------|-------------|----------|-----------|-------------|------------|------------|-------------|
| 1         | 4347850     | 4356473     | NM_01128 | chr1      | 4348331     | 4348916    | 0.06795    | 1           |
| 1         | 9281288     | 9290452     | NM_02767 | chr1      | 9286254     | 9287463    | 0.132024   | 1           |
| 1         | 9580481     | 9589218     | NM_17839 | chr1      | 9585187     | 9585803    | 0.070611   | 1           |
| 1         | 10702645    | 10711157    | NM_17783 | chr1      | 10707392    | 10707997   | 0.071185   | 1           |
| 1         | 10702645    | 10711157    | NM_17783 | chr1      | 10709010    | 10709648   | 0.075062   | 1           |
| 1         | 11393326    | 11401825    | NM_17717 | chr1      | 11399622    | 11400387   | 0.090118   | 1           |
| 1         | 12697743    | 12706258    | NM_17229 | chr1      | 12699338    | 12699935   | 0.070221   | 1           |
| 1         | 14287285    | 14301413    | NM_01016 | chr1      | 14300074    | 14300666   | 0.04197    | 1           |
| 1         | 15875437    | 15883936    | NM_00103 | chr1      | 15883043    | 15883610   | 0.066824   | 1           |
| 1         | 16639580    | 16654876    | NM_02645 | chr1      | 16643959    | 16644745   | 0.051448   | 1           |
| 1         | 16644405    | 16652975    | NM_02639 | chr1      | 16643959    | 16644745   | 0.039785   | 0.433291    |
| 1         | 17080513    | 17089103    | NM_02060 | chr1      | 17084094    | 17084832   | 0.08602    | 1           |
| 1         | 24125975    | 24134496    | NM_00774 | chr1      | 24132174    | 24133247   | 0.126027   | 1           |
| 1         | 24626905    | 24635497    | BC025579 | chr1      | 24627052    | 24627657   | 0.070523   | 1           |
| 1         | 24636204    | 24644703    | AY061989 | chr1      | 24638429    | 24639027   | 0.070471   | 1           |
| 1         | 30891765    | 30900301    | NM_01120 | chr1      | 30893797    | 30894414   | 0.072391   | 1           |
| 1         | 36311228    | 36319727    | NM_17265 | chr1      | 36319571    | 36320022   | 0.018471   | 0.347345    |
| 1         | 36410166    | 36419030    | NM_03357 | chr1      | 36412230    | 36412833   | 0.068133   | 1           |
| 1         | 37157807    | 37166307    | NM_00991 | chr1      | 37159591    | 37160798   | 0.142101   | 1           |
| 1         | 37372057    | 37380596    | NM_19800 | chr1      | 37379807    | 37380425   | 0.072482   | 1           |
| 1         | 37478179    | 37486678    | NM_17387 | chr1      | 37482260    | 37482845   | 0.068941   | 1           |
| 1         | 37567289    | 37575788    | BC029089 | chr1      | 37571249    | 37572932   | 0.198118   | 1           |
| 1         | 37661858    | 37670357    | BC072639 | chr1      | 37662506    | 37663334   | 0.097529   | 1           |
| 1         | 37661858    | 37670357    | BC072639 | chr1      | 37665003    | 37665663   | 0.077765   | 1           |
| 1         | 37858540    | 37867039    | NM_00103 | chr1      | 37859127    | 37859772   | 0.076      | 1           |
| 1         | 39839716    | 39848215    | NM_00869 | chr1      | 39847299    | 39848094   | 0.093647   | 1           |
| 1         | 52651206    | 52659705    | NM_13382 | chr1      | 52658580    | 52659192   | 0.072118   | 1           |
| 1         | 54381017    | 54389516    | NM_00103 | chr1      | 54388590    | 54389231   | 0.075529   | 1           |
| 1         | 57345304    | 57354124    | BC071241 | chr1      | 57345547    | 57346347   | 0.090806   | 1           |
| 1         | 58051682    | 58060181    | NM_02361 | chr1      | 58058833    | 58059537   | 0.082941   | 1           |
| 1         | 58216872    | 58225371    | NM_00100 | chr1      | 58221121    | 58222154   | 0.121647   | 1           |
| 1         | 58695424    | 58703923    | BC023121 | chr1      | 58702123    | 58702721   | 0.070471   | 1           |
| 1         | 59036913    | 59045446    | NM_17520 | chr1      | 59039481    | 59040573   | 0.128076   | 1           |
| 1         | 60916460    | 60924975    | NM_01748 | chr1      | 60917412    | 60918431   | 0.119775   | 1           |
| 1         | 60916460    | 60924975    | NM_01748 | chr1      | 60918578    | 60919322   | 0.087482   | 1           |
| 1         | 64964524    | 64973024    | NM_02758 | chr1      | 64966925    | 64967830   | 0.106576   | 1           |
| 1         | 64982915    | 64991414    | NM_00777 | chr1      | 64985597    | 64986482   | 0.104235   | 1           |
| 1         | 64995198    | 65003697    | NM_00777 | chr1      | 64999384    | 65000442   | 0.124588   | 1           |
| 1         | 72946600    | 72955106    | NM_00940 | chr1      | 72947816    | 72948524   | 0.083343   | 1           |
| 1         | 72946600    | 72955106    | NM_00940 | chr1      | 72950359    | 72951280   | 0.108381   | 1           |
| 1         | 74515568    | 74525189    | NM_02578 | chr1      | 74520972    | 74521632   | 0.068697   | 1           |
| 1         | 74518672    | 74527235    | NM_02988 | chr1      | 74520972    | 74521632   | 0.077184   | 1           |
| 1         | 74659134    | 74667633    | BC002183 | chr1      | 74665962    | 74666572   | 0.071882   | 1           |
| 1         | 74866307    | 74874806    | NM_00103 | chr1      | 74867142    | 74867738   | 0.070235   | 1           |

|   |          |          |          |      |          |          |          |          |
|---|----------|----------|----------|------|----------|----------|----------|----------|
| 1 | 75237492 | 75245991 | NM_01004 | chr1 | 75240605 | 75241355 | 0.088353 | 1        |
| 1 | 75252445 | 75260944 | NM_00746 | chr1 | 75257130 | 75258005 | 0.103059 | 1        |
| 1 | 75269018 | 75277517 | BC048698 | chr1 | 75275743 | 75276451 | 0.083412 | 1        |
| 1 | 78554613 | 78563112 | BC031529 | chr1 | 78560268 | 78560932 | 0.078235 | 1        |
| 1 | 79735146 | 79743660 | NM_00925 | chr1 | 79735703 | 79736325 | 0.073165 | 1        |
| 1 | 80090469 | 80098968 | NM_17342 | chr1 | 80096153 | 80097156 | 0.118118 | 1        |
| 1 | 82213343 | 82221842 | NM_02977 | chr1 | 82213323 | 82213834 | 0.057882 | 0.960938 |
| 1 | 82460000 | 82468499 | NM_00773 | chr1 | 82467049 | 82468005 | 0.112588 | 1        |
| 1 | 82463317 | 82471816 | NM_00773 | chr1 | 82467049 | 82468005 | 0.112588 | 1        |
| 1 | 84572387 | 84581246 | NM_15291 | chr1 | 84573368 | 84574046 | 0.076637 | 1        |
| 1 | 84635554 | 84644053 | BC034113 | chr1 | 84636206 | 84636820 | 0.072353 | 1        |
| 1 | 88411132 | 88419672 | NM_00880 | chr1 | 88417548 | 88418150 | 0.070601 | 1        |
| 1 | 88499176 | 88507743 | NM_01093 | chr1 | 88503958 | 88504554 | 0.069678 | 1        |
| 1 | 89011836 | 89024322 | NM_02160 | chr1 | 89013650 | 89014234 | 0.046849 | 1        |
| 1 | 89311385 | 89319884 | BC022680 | chr1 | 89313168 | 89313987 | 0.096471 | 1        |
| 1 | 89419721 | 89428220 | NM_01575 | chr1 | 89421327 | 89422387 | 0.124824 | 1        |
| 1 | 89880582 | 89889122 | NM_20164 | chr1 | 89886390 | 89886977 | 0.068844 | 1        |
| 1 | 90530823 | 90539362 | NM_17730 | chr1 | 90535430 | 90536158 | 0.085363 | 1        |
| 1 | 91843249 | 91851748 | NM_13915 | chr1 | 91851322 | 91851719 | 0.046824 | 1        |
| 1 | 92605385 | 92613902 | BC057903 | chr1 | 92612818 | 92613857 | 0.122094 | 1        |
| 1 | 93287182 | 93295702 | NM_01106 | chr1 | 93291933 | 93292540 | 0.071353 | 1        |
| 1 | 94319660 | 94328159 | NM_00101 | chr1 | 94322343 | 94323455 | 0.130941 | 1        |
| 1 | 94339970 | 94348469 | NM_14703 | chr1 | 94342533 | 94343310 | 0.091529 | 1        |
| 1 | 94412738 | 94429426 | NM_14649 | chr1 | 94419538 | 94421217 | 0.100665 | 1        |
| 1 | 94412738 | 94429426 | NM_14649 | chr1 | 94424461 | 94425149 | 0.041285 | 1        |
| 1 | 94432245 | 94440744 | NM_14649 | chr1 | 94435418 | 94436562 | 0.134706 | 1        |
| 1 | 94432245 | 94440744 | NM_14649 | chr1 | 94438856 | 94439484 | 0.074    | 1        |
| 1 | 94444287 | 94452786 | NM_20689 | chr1 | 94444429 | 94445016 | 0.069177 | 1        |
| 1 | 94444287 | 94452786 | NM_20689 | chr1 | 94449964 | 94451035 | 0.126118 | 1        |
| 1 | 94959651 | 94968181 | NM_01670 | chr1 | 94959715 | 94960164 | 0.052749 | 1        |
| 1 | 97495478 | 97504000 | NM_00918 | chr1 | 97502581 | 97503168 | 0.06899  | 1        |
| 1 | 1E+08    | 1E+08    | BC112423 | chr1 | 1E+08    | 1E+08    | 0.070926 | 1        |
| 1 | 1.08E+08 | 1.08E+08 | NM_00939 | chr1 | 1.08E+08 | 1.08E+08 | 0.069298 | 1        |
| 1 | 1.09E+08 | 1.09E+08 | NM_01111 | chr1 | 1.09E+08 | 1.09E+08 | 0.079442 | 1        |
| 1 | 1.12E+08 | 1.12E+08 | AY267034 | chr1 | 1.12E+08 | 1.12E+08 | 0.096    | 1        |
| 1 | 1.33E+08 | 1.33E+08 | NM_01108 | chr1 | 1.33E+08 | 1.33E+08 | 0.060911 | 1        |
| 1 | 1.33E+08 | 1.33E+08 | NM_01108 | chr1 | 1.33E+08 | 1.33E+08 | 0.039077 | 1        |
| 1 | 1.33E+08 | 1.33E+08 | NM_02138 | chr1 | 1.33E+08 | 1.33E+08 | 0.217888 | 1        |
| 1 | 1.33E+08 | 1.33E+08 | AY261333 | chr1 | 1.33E+08 | 1.33E+08 | 0.072235 | 1        |
| 1 | 1.33E+08 | 1.33E+08 | NM_01977 | chr1 | 1.33E+08 | 1.33E+08 | 0.083138 | 1        |
| 1 | 1.34E+08 | 1.34E+08 | NM_17887 | chr1 | 1.34E+08 | 1.34E+08 | 0.079647 | 1        |
| 1 | 1.34E+08 | 1.34E+08 | NM_02902 | chr1 | 1.34E+08 | 1.34E+08 | 0.086611 | 1        |
| 1 | 1.34E+08 | 1.34E+08 | BC062092 | chr1 | 1.34E+08 | 1.34E+08 | 0.047529 | 1        |
| 1 | 1.35E+08 | 1.35E+08 | NM_01073 | chr1 | 1.35E+08 | 1.35E+08 | 0.091003 | 1        |
| 1 | 1.36E+08 | 1.36E+08 | NM_02797 | chr1 | 1.36E+08 | 1.36E+08 | 0.039024 | 1        |
| 1 | 1.36E+08 | 1.36E+08 | AY536287 | chr1 | 1.36E+08 | 1.36E+08 | 0.069647 | 1        |
| 1 | 1.36E+08 | 1.36E+08 | NM_00100 | chr1 | 1.36E+08 | 1.36E+08 | 0.077195 | 1        |

|   |          |          |               |          |          |          |   |
|---|----------|----------|---------------|----------|----------|----------|---|
| 1 | 1.36E+08 | 1.36E+08 | NM_03118 chr1 | 1.36E+08 | 1.36E+08 | 0.068784 | 1 |
| 1 | 1.37E+08 | 1.37E+08 | NM_00103 chr1 | 1.37E+08 | 1.37E+08 | 0.098824 | 1 |
| 1 | 1.37E+08 | 1.37E+08 | NM_13443 chr1 | 1.37E+08 | 1.37E+08 | 0.110373 | 1 |
| 1 | 1.37E+08 | 1.37E+08 | NM_14541 chr1 | 1.37E+08 | 1.37E+08 | 0.071529 | 1 |
| 1 | 1.38E+08 | 1.38E+08 | L06234 chr1   | 1.38E+08 | 1.38E+08 | 0.059831 | 1 |
| 1 | 1.46E+08 | 1.46E+08 | NM_15317 chr1 | 1.46E+08 | 1.46E+08 | 0.071653 | 1 |
| 1 | 1.52E+08 | 1.52E+08 | BC029834 chr1 | 1.52E+08 | 1.52E+08 | 0.078235 | 1 |
| 1 | 1.52E+08 | 1.52E+08 | AB034730 chr1 | 1.52E+08 | 1.52E+08 | 0.105437 | 1 |
| 1 | 1.55E+08 | 1.55E+08 | NM_02636 chr1 | 1.55E+08 | 1.55E+08 | 0.086553 | 1 |
| 1 | 1.55E+08 | 1.55E+08 | NM_01068 chr1 | 1.55E+08 | 1.55E+08 | 0.090123 | 1 |
| 1 | 1.56E+08 | 1.56E+08 | NM_17824 chr1 | 1.56E+08 | 1.56E+08 | 0.120758 | 1 |
| 1 | 1.56E+08 | 1.56E+08 | NM_17824 chr1 | 1.56E+08 | 1.56E+08 | 0.076293 | 1 |
| 1 | 1.62E+08 | 1.62E+08 | NM_17783 chr1 | 1.62E+08 | 1.62E+08 | 0.070941 | 1 |
| 1 | 1.64E+08 | 1.64E+08 | BC057865 chr1 | 1.64E+08 | 1.64E+08 | 0.074268 | 1 |
| 1 | 1.64E+08 | 1.64E+08 | NM_02607 chr1 | 1.64E+08 | 1.64E+08 | 0.062723 | 1 |
| 1 | 1.64E+08 | 1.64E+08 | NM_01086 chr1 | 1.64E+08 | 1.64E+08 | 0.131397 | 1 |
| 1 | 1.65E+08 | 1.65E+08 | NM_14487 chr1 | 1.65E+08 | 1.65E+08 | 0.081332 | 1 |
| 1 | 1.65E+08 | 1.65E+08 | NM_14487 chr1 | 1.65E+08 | 1.65E+08 | 0.073774 | 1 |
| 1 | 1.65E+08 | 1.65E+08 | NM_14487 chr1 | 1.65E+08 | 1.65E+08 | 0.08646  | 1 |
| 1 | 1.65E+08 | 1.65E+08 | NM_00803 chr1 | 1.65E+08 | 1.65E+08 | 0.082601 | 1 |
| 1 | 1.66E+08 | 1.66E+08 | NM_01134 chr1 | 1.66E+08 | 1.66E+08 | 0.068089 | 1 |
| 1 | 1.66E+08 | 1.66E+08 | NM_17807 chr1 | 1.66E+08 | 1.66E+08 | 0.095523 | 1 |
| 1 | 1.67E+08 | 1.67E+08 | NM_03200 chr1 | 1.67E+08 | 1.67E+08 | 0.067443 | 1 |
| 1 | 1.69E+08 | 1.69E+08 | NM_00101 chr1 | 1.69E+08 | 1.69E+08 | 0.092588 | 1 |
| 1 | 1.69E+08 | 1.69E+08 | NM_00910 chr1 | 1.69E+08 | 1.69E+08 | 0.069165 | 1 |
| 1 | 1.69E+08 | 1.69E+08 | NM_00910 chr1 | 1.69E+08 | 1.69E+08 | 0.127349 | 1 |
| 1 | 1.72E+08 | 1.72E+08 | NM_02256 chr1 | 1.72E+08 | 1.72E+08 | 0.13832  | 1 |
| 1 | 1.72E+08 | 1.72E+08 | NM_17706 chr1 | 1.72E+08 | 1.72E+08 | 0.072915 | 1 |
| 1 | 1.73E+08 | 1.73E+08 | NM_01391 chr1 | 1.73E+08 | 1.73E+08 | 0.02716  | 1 |
| 1 | 1.73E+08 | 1.73E+08 | NM_14453 chr1 | 1.73E+08 | 1.73E+08 | 0.090967 | 1 |
| 1 | 1.74E+08 | 1.74E+08 | NM_17772 chr1 | 1.74E+08 | 1.74E+08 | 0.087584 | 1 |
| 1 | 1.76E+08 | 1.76E+08 | NM_00832 chr1 | 1.76E+08 | 1.76E+08 | 0.086703 | 1 |
| 1 | 1.76E+08 | 1.76E+08 | NM_14630 chr1 | 1.76E+08 | 1.76E+08 | 0.031974 | 1 |
| 1 | 1.76E+08 | 1.76E+08 | NM_02547 chr1 | 1.76E+08 | 1.76E+08 | 0.040884 | 1 |
| 1 | 1.76E+08 | 1.76E+08 | NM_14671 chr1 | 1.76E+08 | 1.76E+08 | 0.072353 | 1 |
| 1 | 1.76E+08 | 1.76E+08 | NM_14671 chr1 | 1.76E+08 | 1.76E+08 | 0.096824 | 1 |
| 1 | 1.8E+08  | 1.8E+08  | NM_02707 chr1 | 1.8E+08  | 1.8E+08  | 0.081059 | 1 |
| 1 | 1.82E+08 | 1.82E+08 | U57325 chr1   | 1.82E+08 | 1.82E+08 | 0.121647 | 1 |
| 1 | 1.82E+08 | 1.82E+08 | BC120654 chr1 | 1.82E+08 | 1.82E+08 | 0.141248 | 1 |
| 1 | 1.84E+08 | 1.84E+08 | NM_17512 chr1 | 1.84E+08 | 1.84E+08 | 0.082353 | 1 |
| 1 | 1.84E+08 | 1.84E+08 | NM_17512 chr1 | 1.84E+08 | 1.84E+08 | 0.077882 | 1 |
| 1 | 1.89E+08 | 1.89E+08 | NM_03307 chr1 | 1.89E+08 | 1.89E+08 | 0.038422 | 1 |
| 1 | 1.91E+08 | 1.91E+08 | BC056167 chr1 | 1.91E+08 | 1.91E+08 | 0.096588 | 1 |
| 1 | 1.95E+08 | 1.95E+08 | NM_14481 chr1 | 1.95E+08 | 1.95E+08 | 0.046756 | 1 |
| 1 | 1.97E+08 | 1.97E+08 | NM_13365 chr1 | 1.97E+08 | 1.97E+08 | 0.081243 | 1 |
| 2 | 4064143  | 4072643  | NM_17247 chr2 | 4068501  | 4069287  | 0.092577 | 1 |
| 2 | 4538026  | 4546525  | BC046822 chr2 | 4540226  | 4540871  | 0.076    | 1 |

|   |          |          |          |      |          |          |          |          |
|---|----------|----------|----------|------|----------|----------|----------|----------|
| 2 | 5049048  | 5057547  | NM_02880 | chr2 | 5055483  | 5056099  | 0.072588 | 1        |
| 2 | 5857516  | 5866053  | BC117994 | chr2 | 5865619  | 5866242  | 0.050949 | 0.697115 |
| 2 | 6044907  | 6056844  | NM_14488 | chr2 | 6056247  | 6057116  | 0.050092 | 0.687356 |
| 2 | 10282363 | 10292934 | NM_17738 | chr2 | 10283573 | 10284310 | 0.069807 | 1        |
| 2 | 11162398 | 11170897 | AB062122 | chr2 | 11162420 | 11163085 | 0.078353 | 1        |
| 2 | 14141168 | 14149667 | NM_00862 | chr2 | 14146171 | 14147057 | 0.104353 | 1        |
| 2 | 17912201 | 17920712 | NM_02662 | chr2 | 17913666 | 17914396 | 0.085879 | 1        |
| 2 | 19469165 | 19477668 | NM_02760 | chr2 | 19476222 | 19476897 | 0.079492 | 1        |
| 2 | 21052674 | 21061173 | NM_00100 | chr2 | 21053083 | 21053748 | 0.078353 | 1        |
| 2 | 21052674 | 21061173 | NM_00100 | chr2 | 21053799 | 21054414 | 0.072471 | 1        |
| 2 | 21052674 | 21061173 | NM_00100 | chr2 | 21054985 | 21055590 | 0.071294 | 1        |
| 2 | 23868881 | 23877388 | NM_08046 | chr2 | 23871744 | 23872502 | 0.08921  | 1        |
| 2 | 24092963 | 24101907 | NM_01945 | chr2 | 24100681 | 24101311 | 0.070542 | 1        |
| 2 | 24201406 | 24209905 | NM_17761 | chr2 | 24207842 | 24208477 | 0.074824 | 1        |
| 2 | 25469127 | 25482463 | NM_00104 | chr2 | 25480323 | 25480926 | 0.045288 | 1        |
| 2 | 25581557 | 25590056 | NM_01069 | chr2 | 25587672 | 25588496 | 0.097059 | 1        |
| 2 | 25639162 | 25647661 | NM_02995 | chr2 | 25643681 | 25644382 | 0.082588 | 1        |
| 2 | 25693870 | 25702369 | NM_17546 | chr2 | 25697568 | 25698515 | 0.111529 | 1        |
| 2 | 25942291 | 25950820 | NM_02649 | chr2 | 25943252 | 25944065 | 0.095428 | 1        |
| 2 | 26750078 | 26758577 | NM_19862 | chr2 | 26757271 | 26757667 | 0.046706 | 1        |
| 2 | 26752881 | 26761937 | NM_01151 | chr2 | 26757271 | 26757667 | 0.043834 | 1        |
| 2 | 28281960 | 28292583 | NM_08045 | chr2 | 28291154 | 28292118 | 0.090832 | 1        |
| 2 | 28285834 | 28294341 | NM_02704 | chr2 | 28291154 | 28292118 | 0.113423 | 1        |
| 2 | 28313755 | 28338017 | NM_00905 | chr2 | 28319666 | 28320726 | 0.043729 | 1        |
| 2 | 28519161 | 28527660 | NM_02728 | chr2 | 28525072 | 28525484 | 0.048588 | 1        |
| 2 | 30178741 | 30187314 | NM_13930 | chr2 | 30185800 | 30187347 | 0.176697 | 0.978682 |
| 2 | 30180281 | 30188843 | NM_17539 | chr2 | 30185800 | 30187347 | 0.180778 | 1        |
| 2 | 32513628 | 32522161 | NM_01023 | chr2 | 32519295 | 32519979 | 0.080267 | 1        |
| 2 | 33044204 | 33052703 | AF125176 | chr2 | 33051949 | 33052671 | 0.085059 | 1        |
| 2 | 33190939 | 33199487 | NM_17521 | chr2 | 33196571 | 33197209 | 0.074746 | 1        |
| 2 | 34920170 | 34928682 | NM_17888 | chr2 | 34920432 | 34921313 | 0.103606 | 1        |
| 2 | 37035500 | 37043999 | NM_00100 | chr2 | 37036524 | 37037216 | 0.081529 | 1        |
| 2 | 38530297 | 38542513 | NM_13905 | chr2 | 38536923 | 38537760 | 0.068593 | 1        |
| 2 | 42472477 | 42481607 | NM_05301 | chr2 | 42479376 | 42480110 | 0.080495 | 1        |
| 2 | 52921499 | 52929998 | AF513716 | chr2 | 52925317 | 52925905 | 0.069294 | 1        |
| 2 | 58329046 | 58337545 | NM_00739 | chr2 | 58329831 | 58330605 | 0.091177 | 1        |
| 2 | 58350712 | 58359211 | AF332088 | chr2 | 58352460 | 58353530 | 0.126    | 1        |
| 2 | 60679810 | 60688309 | BC057866 | chr2 | 60686968 | 60687694 | 0.085529 | 1        |
| 2 | 60761532 | 60774952 | NM_02029 | chr2 | 60766016 | 60767147 | 0.084345 | 1        |
| 2 | 61387966 | 61396497 | BC026148 | chr2 | 61388697 | 61389567 | 0.102086 | 1        |
| 2 | 61841402 | 61849932 | NM_03355 | chr2 | 61845762 | 61846711 | 0.111359 | 1        |
| 2 | 62444493 | 62452999 | NM_02783 | chr2 | 62449304 | 62449908 | 0.071118 | 1        |
| 2 | 68930662 | 68939185 | NM_18154 | chr2 | 68936679 | 68937671 | 0.116495 | 1        |
| 2 | 70912891 | 70921450 | AF354666 | chr2 | 70915409 | 70916060 | 0.076168 | 1        |
| 2 | 71006815 | 71015354 | NM_01006 | chr2 | 71007238 | 71008077 | 0.098361 | 1        |
| 2 | 73573438 | 73581937 | BC054770 | chr2 | 73573447 | 73574106 | 0.077647 | 1        |
| 2 | 74557819 | 74566419 | NM_01046 | chr2 | 74561145 | 74562246 | 0.128125 | 1        |

|   |          |          |          |      |          |          |          |          |
|---|----------|----------|----------|------|----------|----------|----------|----------|
| 2 | 79453095 | 79461594 | BC018526 | chr2 | 79459995 | 79460901 | 0.106706 | 1        |
| 2 | 79927279 | 79936314 | NM_01674 | chr2 | 79932428 | 79933276 | 0.093958 | 1        |
| 2 | 84573152 | 84582243 | NM_00977 | chr2 | 84576441 | 84577051 | 0.067202 | 1        |
| 2 | 84931225 | 84939724 | NM_01178 | chr2 | 84931259 | 84931873 | 0.072353 | 1        |
| 2 | 84995039 | 85003538 | NM_00103 | chr2 | 85001847 | 85002442 | 0.070118 | 1        |
| 2 | 85745904 | 85754403 | NM_00101 | chr2 | 85749260 | 85749917 | 0.077412 | 1        |
| 2 | 85745904 | 85754403 | NM_00101 | chr2 | 85751820 | 85752504 | 0.080588 | 1        |
| 2 | 85970155 | 85978654 | NM_14701 | chr2 | 85971385 | 85972256 | 0.102588 | 1        |
| 2 | 86027309 | 86043672 | NM_14701 | chr2 | 86035253 | 86035843 | 0.036116 | 1        |
| 2 | 86489313 | 86497812 | NM_14684 | chr2 | 86495871 | 86496896 | 0.120706 | 1        |
| 2 | 86777134 | 86785633 | NM_14659 | chr2 | 86779145 | 86780005 | 0.101294 | 1        |
| 2 | 88695935 | 88704434 | NM_14677 | chr2 | 88697305 | 88697935 | 0.074235 | 1        |
| 2 | 88772229 | 88780728 | NM_14689 | chr2 | 88773811 | 88774492 | 0.080235 | 1        |
| 2 | 89374064 | 89382563 | NM_14678 | chr2 | 89380619 | 89381241 | 0.073294 | 1        |
| 2 | 89408487 | 89425029 | NM_14696 | chr2 | 89422405 | 89422965 | 0.033912 | 1        |
| 2 | 89850662 | 89859161 | NM_02051 | chr2 | 89852380 | 89853058 | 0.079882 | 1        |
| 2 | 90051326 | 90059825 | NM_14698 | chr2 | 90055268 | 90056075 | 0.095059 | 1        |
| 2 | 90064768 | 90073267 | NM_14679 | chr2 | 90068781 | 90069724 | 0.111059 | 1        |
| 2 | 1.01E+08 | 1.01E+08 | NM_00902 | chr2 | 1.01E+08 | 1.01E+08 | 0.124825 | 1        |
| 2 | 1.01E+08 | 1.01E+08 | NM_00902 | chr2 | 1.01E+08 | 1.01E+08 | 0.072464 | 1        |
| 2 | 1.02E+08 | 1.02E+08 | NM_02026 | chr2 | 1.02E+08 | 1.02E+08 | 0.064942 | 1        |
| 2 | 1.03E+08 | 1.03E+08 | NM_00791 | chr2 | 1.03E+08 | 1.03E+08 | 0.069454 | 1        |
| 2 | 1.05E+08 | 1.05E+08 | NM_00903 | chr2 | 1.05E+08 | 1.05E+08 | 0.08345  | 1        |
| 2 | 1.07E+08 | 1.07E+08 | NM_02127 | chr2 | 1.07E+08 | 1.07E+08 | 0.074623 | 1        |
| 2 | 1.09E+08 | 1.09E+08 | NM_00754 | chr2 | 1.09E+08 | 1.09E+08 | 0.076097 | 1        |
| 2 | 1.1E+08  | 1.1E+08  | BC034862 | chr2 | 1.1E+08  | 1.1E+08  | 0.071647 | 1        |
| 2 | 1.12E+08 | 1.12E+08 | NM_14640 | chr2 | 1.12E+08 | 1.12E+08 | 0.092706 | 1        |
| 2 | 1.12E+08 | 1.12E+08 | NM_14640 | chr2 | 1.12E+08 | 1.12E+08 | 0.079765 | 1        |
| 2 | 1.12E+08 | 1.12E+08 | NM_14645 | chr2 | 1.12E+08 | 1.12E+08 | 0.086235 | 1        |
| 2 | 1.12E+08 | 1.12E+08 | NM_14674 | chr2 | 1.12E+08 | 1.12E+08 | 0.126824 | 1        |
| 2 | 1.13E+08 | 1.13E+08 | NM_01023 | chr2 | 1.13E+08 | 1.13E+08 | 0.115294 | 1        |
| 2 | 1.14E+08 | 1.14E+08 | NM_01182 | chr2 | 1.14E+08 | 1.14E+08 | 0.035396 | 1        |
| 2 | 1.19E+08 | 1.19E+08 | NM_02811 | chr2 | 1.19E+08 | 1.19E+08 | 0.093268 | 1        |
| 2 | 1.19E+08 | 1.19E+08 | NM_00103 | chr2 | 1.19E+08 | 1.19E+08 | 0.033966 | 0.688415 |
| 2 | 1.21E+08 | 1.21E+08 | NM_01135 | chr2 | 1.21E+08 | 1.21E+08 | 0.036474 | 1        |
| 2 | 1.21E+08 | 1.21E+08 | NM_00102 | chr2 | 1.21E+08 | 1.21E+08 | 0.070095 | 1        |
| 2 | 1.21E+08 | 1.21E+08 | BC057549 | chr2 | 1.21E+08 | 1.21E+08 | 0.071765 | 1        |
| 2 | 1.21E+08 | 1.21E+08 | BC057549 | chr2 | 1.21E+08 | 1.21E+08 | 0.099647 | 1        |
| 2 | 1.22E+08 | 1.22E+08 | NM_02625 | chr2 | 1.22E+08 | 1.22E+08 | 0.070588 | 1        |
| 2 | 1.25E+08 | 1.25E+08 | NM_17503 | chr2 | 1.25E+08 | 1.25E+08 | 0.069906 | 1        |
| 2 | 1.26E+08 | 1.26E+08 | NM_00800 | chr2 | 1.26E+08 | 1.26E+08 | 0.081412 | 1        |
| 2 | 1.27E+08 | 1.27E+08 | NM_02996 | chr2 | 1.27E+08 | 1.27E+08 | 0.070295 | 1        |
| 2 | 1.27E+08 | 1.27E+08 | NM_02814 | chr2 | 1.27E+08 | 1.27E+08 | 0.070353 | 1        |
| 2 | 1.29E+08 | 1.29E+08 | NM_17784 | chr2 | 1.29E+08 | 1.29E+08 | 0.051313 | 1        |
| 2 | 1.29E+08 | 1.29E+08 | NM_17765 | chr2 | 1.29E+08 | 1.29E+08 | 0.093059 | 1        |
| 2 | 1.29E+08 | 1.29E+08 | NM_01886 | chr2 | 1.29E+08 | 1.29E+08 | 0.110118 | 1        |
| 2 | 1.3E+08  | 1.3E+08  | NM_17772 | chr2 | 1.3E+08  | 1.3E+08  | 0.11876  | 1        |

|   |          |          |               |          |          |          |          |
|---|----------|----------|---------------|----------|----------|----------|----------|
| 2 | 1.32E+08 | 1.33E+08 | NM_17511 chr2 | 1.33E+08 | 1.33E+08 | 0.045546 | 1        |
| 2 | 1.34E+08 | 1.34E+08 | NM_01040 chr2 | 1.34E+08 | 1.34E+08 | 0.097294 | 1        |
| 2 | 1.36E+08 | 1.36E+08 | NM_02953 chr2 | 1.36E+08 | 1.36E+08 | 0.058413 | 1        |
| 2 | 1.38E+08 | 1.38E+08 | NM_14553 chr2 | 1.38E+08 | 1.38E+08 | 0.072581 | 1        |
| 2 | 1.38E+08 | 1.38E+08 | NM_14553 chr2 | 1.38E+08 | 1.38E+08 | 0.075193 | 1        |
| 2 | 1.4E+08  | 1.4E+08  | BC005776 chr2 | 1.4E+08  | 1.4E+08  | 0.060706 | 1        |
| 2 | 1.43E+08 | 1.43E+08 | NM_02059 chr2 | 1.43E+08 | 1.43E+08 | 0.06901  | 1        |
| 2 | 1.49E+08 | 1.49E+08 | NM_02702 chr2 | 1.49E+08 | 1.49E+08 | 0.088166 | 1        |
| 2 | 1.5E+08  | 1.5E+08  | NM_18126 chr2 | 1.5E+08  | 1.5E+08  | 0.071169 | 1        |
| 2 | 1.5E+08  | 1.5E+08  | NM_17211 chr2 | 1.5E+08  | 1.5E+08  | 0.083421 | 1        |
| 2 | 1.51E+08 | 1.51E+08 | BC027537 chr2 | 1.51E+08 | 1.51E+08 | 0.084429 | 1        |
| 2 | 1.52E+08 | 1.52E+08 | NM_00100 chr2 | 1.52E+08 | 1.52E+08 | 0.104471 | 1        |
| 2 | 1.52E+08 | 1.52E+08 | NM_14515 chr2 | 1.52E+08 | 1.52E+08 | 0.063065 | 1        |
| 2 | 1.52E+08 | 1.52E+08 | NM_00103 chr2 | 1.52E+08 | 1.52E+08 | 0.073407 | 1        |
| 2 | 1.54E+08 | 1.54E+08 | NM_02959 chr2 | 1.54E+08 | 1.54E+08 | 0.103882 | 1        |
| 2 | 1.54E+08 | 1.54E+08 | NM_02563 chr2 | 1.54E+08 | 1.54E+08 | 0.103335 | 1        |
| 2 | 1.54E+08 | 1.54E+08 | NM_01112 chr2 | 1.54E+08 | 1.54E+08 | 0.072704 | 1        |
| 2 | 1.54E+08 | 1.54E+08 | NM_17516 chr2 | 1.54E+08 | 1.54E+08 | 0.06827  | 1        |
| 2 | 1.54E+08 | 1.54E+08 | NM_17516 chr2 | 1.54E+08 | 1.54E+08 | 0.1139   | 1        |
| 2 | 1.54E+08 | 1.54E+08 | NM_17516 chr2 | 1.54E+08 | 1.54E+08 | 0.173842 | 1        |
| 2 | 1.54E+08 | 1.54E+08 | NM_00102 chr2 | 1.54E+08 | 1.54E+08 | 0.137529 | 1        |
| 2 | 1.58E+08 | 1.58E+08 | NM_17765 chr2 | 1.58E+08 | 1.58E+08 | 0.062118 | 1        |
| 2 | 1.58E+08 | 1.58E+08 | NM_14563 chr2 | 1.58E+08 | 1.58E+08 | 0.079393 | 1        |
| 2 | 1.63E+08 | 1.63E+08 | NM_01373 chr2 | 1.63E+08 | 1.63E+08 | 0.04265  | 1        |
| 2 | 1.63E+08 | 1.63E+08 | NM_01373 chr2 | 1.63E+08 | 1.63E+08 | 0.051496 | 1        |
| 2 | 1.63E+08 | 1.63E+08 | BC022635 chr2 | 1.63E+08 | 1.63E+08 | 0.074235 | 0.984399 |
| 2 | 1.64E+08 | 1.64E+08 | NM_01739 chr2 | 1.64E+08 | 1.64E+08 | 0.129882 | 1        |
| 2 | 1.64E+08 | 1.64E+08 | NM_02136 chr2 | 1.64E+08 | 1.64E+08 | 0.069765 | 1        |
| 2 | 1.64E+08 | 1.64E+08 | NM_00103 chr2 | 1.64E+08 | 1.64E+08 | 0.038009 | 1        |
| 2 | 1.64E+08 | 1.64E+08 | NM_00101 chr2 | 1.64E+08 | 1.64E+08 | 0.087177 | 1        |
| 2 | 1.64E+08 | 1.64E+08 | AY757956 chr2 | 1.64E+08 | 1.64E+08 | 0.087177 | 1        |
| 2 | 1.65E+08 | 1.65E+08 | NM_17070 chr2 | 1.65E+08 | 1.65E+08 | 0.108054 | 1        |
| 2 | 1.66E+08 | 1.66E+08 | BC023300 chr2 | 1.66E+08 | 1.66E+08 | 0.124235 | 1        |
| 2 | 1.67E+08 | 1.67E+08 | NM_00896 chr2 | 1.67E+08 | 1.67E+08 | 0.065083 | 1        |
| 2 | 1.7E+08  | 1.7E+08  | NM_02981 chr2 | 1.7E+08  | 1.7E+08  | 0.064801 | 1        |
| 2 | 1.7E+08  | 1.7E+08  | NM_00101 chr2 | 1.7E+08  | 1.7E+08  | 0.080588 | 1        |
| 2 | 1.72E+08 | 1.72E+08 | NM_00856 chr2 | 1.72E+08 | 1.72E+08 | 0.10462  | 1        |
| 2 | 1.73E+08 | 1.73E+08 | NM_01204 chr2 | 1.73E+08 | 1.73E+08 | 0.069228 | 1        |
| 2 | 1.73E+08 | 1.73E+08 | DQ153171 chr2 | 1.73E+08 | 1.73E+08 | 0.117059 | 1        |
| 2 | 1.74E+08 | 1.74E+08 | NM_17267 chr2 | 1.74E+08 | 1.74E+08 | 0.071529 | 1        |
| 2 | 1.74E+08 | 1.74E+08 | NM_21373 chr2 | 1.74E+08 | 1.74E+08 | 0.071647 | 1        |
| 2 | 1.8E+08  | 1.8E+08  | NM_17875 chr2 | 1.8E+08  | 1.8E+08  | 0.104277 | 1        |
| 2 | 1.8E+08  | 1.8E+08  | NM_17303 chr2 | 1.8E+08  | 1.8E+08  | 0.073034 | 1        |
| 2 | 1.8E+08  | 1.8E+08  | NM_01876 chr2 | 1.8E+08  | 1.8E+08  | 0.098353 | 1        |
| 2 | 1.8E+08  | 1.8E+08  | NM_01876 chr2 | 1.8E+08  | 1.8E+08  | 0.127882 | 1        |
| 2 | 1.81E+08 | 1.81E+08 | BC030945 chr2 | 1.81E+08 | 1.81E+08 | 0.065773 | 1        |
| 2 | 1.81E+08 | 1.81E+08 | BC030945 chr2 | 1.81E+08 | 1.81E+08 | 0.090804 | 1        |

|   |          |          |          |      |          |          |          |          |
|---|----------|----------|----------|------|----------|----------|----------|----------|
| 2 | 1.81E+08 | 1.81E+08 | BC044755 | chr2 | 1.81E+08 | 1.81E+08 | 0.087647 | 1        |
| 2 | 1.81E+08 | 1.81E+08 | BC024465 | chr2 | 1.81E+08 | 1.81E+08 | 0.104    | 1        |
| 2 | 1.82E+08 | 1.82E+08 | NM_01101 | chr2 | 1.82E+08 | 1.82E+08 | 0.083784 | 1        |
| 2 | 1.82E+08 | 1.82E+08 | NM_01101 | chr2 | 1.82E+08 | 1.82E+08 | 0.087032 | 1        |
| 3 | 10418298 | 10428632 | NM_02906 | chr3 | 10418416 | 10418794 | 0.036672 | 1        |
| 3 | 14504532 | 14513067 | NM_02891 | chr3 | 14509547 | 14510142 | 0.069822 | 1        |
| 3 | 20464303 | 20472802 | NM_02970 | chr3 | 20471338 | 20471965 | 0.073882 | 1        |
| 3 | 28084942 | 28093441 | BC119391 | chr3 | 28086572 | 28087208 | 0.074941 | 1        |
| 3 | 31498674 | 31507173 | NM_17286 | chr3 | 31499098 | 31499695 | 0.070353 | 1        |
| 3 | 32894275 | 32902806 | NM_01967 | chr3 | 32896177 | 32896700 | 0.061416 | 1        |
| 3 | 33985744 | 33994266 | NM_02597 | chr3 | 33990267 | 33990907 | 0.075208 | 1        |
| 3 | 36251549 | 36260127 | NM_17267 | chr3 | 36257821 | 36258816 | 0.116097 | 1        |
| 3 | 37504615 | 37513856 | NM_00100 | chr3 | 37511801 | 37512526 | 0.078554 | 1        |
| 3 | 37605847 | 37614346 | NM_02134 | chr3 | 37607566 | 37608163 | 0.070353 | 1        |
| 3 | 37900259 | 37908777 | NM_02417 | chr3 | 37904134 | 37904782 | 0.076183 | 1        |
| 3 | 37913410 | 37922039 | NM_19865 | chr3 | 37918583 | 37919234 | 0.07555  | 1        |
| 3 | 41646281 | 41662509 | BC020316 | chr3 | 41650181 | 41650795 | 0.037895 | 1        |
| 3 | 41671744 | 41680243 | NM_17230 | chr3 | 41676991 | 41678031 | 0.122471 | 1        |
| 3 | 45468806 | 45477868 | NM_01104 | chr3 | 45470866 | 45471478 | 0.067638 | 1        |
| 3 | 50537276 | 50545808 | NM_01199 | chr3 | 50543330 | 50544141 | 0.09516  | 1        |
| 3 | 51306376 | 51315383 | NM_00983 | chr3 | 51307131 | 51307746 | 0.068384 | 1        |
| 3 | 55140348 | 55148984 | NM_00762 | chr3 | 55141299 | 55142130 | 0.09633  | 1        |
| 3 | 55194069 | 55202568 | NM_14489 | chr3 | 55201197 | 55201809 | 0.072118 | 1        |
| 3 | 55864441 | 55872989 | NM_01075 | chr3 | 55867118 | 55867755 | 0.074629 | 1        |
| 3 | 57380303 | 57395848 | NM_00853 | chr3 | 57387408 | 57388388 | 0.063103 | 1        |
| 3 | 57380303 | 57395848 | NM_00853 | chr3 | 57393859 | 57394471 | 0.039431 | 1        |
| 3 | 58658610 | 58667210 | NM_00104 | chr3 | 58660512 | 58661291 | 0.090687 | 1        |
| 3 | 59216001 | 59225257 | NM_13320 | chr3 | 59219607 | 59220195 | 0.063628 | 1        |
| 3 | 63787784 | 63796283 | BC057610 | chr3 | 63788256 | 63789182 | 0.109059 | 1        |
| 3 | 65190943 | 65200071 | NM_01059 | chr3 | 65192116 | 65192752 | 0.069778 | 1        |
| 3 | 68772573 | 68781955 | NM_00835 | chr3 | 68774791 | 68775375 | 0.062347 | 1        |
| 3 | 69661392 | 69669891 | BC003835 | chr3 | 69663305 | 69664200 | 0.105412 | 1        |
| 3 | 84296266 | 84312788 | NM_03070 | chr3 | 84296527 | 84297390 | 0.052291 | 1        |
| 3 | 84296266 | 84312788 | NM_03070 | chr3 | 84305305 | 84306444 | 0.068995 | 1        |
| 3 | 85032138 | 85040715 | NM_08042 | chr3 | 85034298 | 85034893 | 0.06948  | 1        |
| 3 | 86085919 | 86094418 | NM_00100 | chr3 | 86090191 | 86091184 | 0.116941 | 1        |
| 3 | 86165250 | 86173749 | BC031117 | chr3 | 86169576 | 86170166 | 0.069529 | 1        |
| 3 | 87437855 | 87446401 | NM_00969 | chr3 | 87443440 | 87444185 | 0.087282 | 1        |
| 3 | 87698028 | 87707177 | NM_00100 | chr3 | 87705464 | 87706113 | 0.071038 | 1        |
| 3 | 87843816 | 87860880 | NM_02846 | chr3 | 87846043 | 87847194 | 0.067507 | 1        |
| 3 | 88416187 | 88424737 | NM_17824 | chr3 | 88423694 | 88424327 | 0.074143 | 1        |
| 3 | 88417861 | 88426390 | NM_02424 | chr3 | 88423694 | 88424327 | 0.074326 | 1        |
| 3 | 88452978 | 88461639 | NM_03136 | chr3 | 88454268 | 88455062 | 0.09178  | 1        |
| 3 | 88462127 | 88476391 | NM_00754 | chr3 | 88463275 | 88464061 | 0.05517  | 1        |
| 3 | 88462127 | 88476391 | NM_00754 | chr3 | 88469115 | 88469813 | 0.049001 | 1        |
| 3 | 88659598 | 88668113 | NM_02544 | chr3 | 88666504 | 88667379 | 0.102865 | 1        |
| 3 | 89033710 | 89042209 | NM_02299 | chr3 | 89033585 | 89034114 | 0.047647 | 0.764151 |



|   |          |          |          |      |          |          |          |   |
|---|----------|----------|----------|------|----------|----------|----------|---|
| 3 | 90082073 | 90090624 | NM_01182 | chr3 | 90083103 | 90083703 | 0.070276 | 1 |
| 3 | 90473355 | 90481865 | NM_01198 | chr3 | 90478690 | 90479330 | 0.075314 | 1 |
| 3 | 90680142 | 90702168 | NM_01131 | chr3 | 90681082 | 90681851 | 0.034957 | 1 |
| 3 | 90680142 | 90702168 | NM_01131 | chr3 | 90694877 | 90695789 | 0.041449 | 1 |
| 3 | 92431546 | 92440045 | NM_01147 | chr3 | 92437804 | 92438440 | 0.074941 | 1 |
| 3 | 92511985 | 92520484 | NM_01147 | chr3 | 92518506 | 92519366 | 0.101294 | 1 |
| 3 | 92512314 | 92520826 | BC031517 | chr3 | 92518506 | 92519366 | 0.101139 | 1 |
| 3 | 92567617 | 92577284 | NM_00926 | chr3 | 92569929 | 92570843 | 0.094642 | 1 |
| 3 | 92803254 | 92811753 | NM_02639 | chr3 | 92804168 | 92805303 | 0.133647 | 1 |
| 3 | 92934190 | 92942689 | NM_02862 | chr3 | 92935634 | 92936553 | 0.108235 | 1 |
| 3 | 93009134 | 93017633 | NM_00103 | chr3 | 93016873 | 93017587 | 0.084118 | 1 |
| 3 | 93012382 | 93020888 | NM_02550 | chr3 | 93016873 | 93017587 | 0.084048 | 1 |
| 3 | 93071629 | 93080128 | NM_00101 | chr3 | 93076498 | 93077223 | 0.085412 | 1 |
| 3 | 93634521 | 93643089 | NM_00911 | chr3 | 93638476 | 93639355 | 0.102696 | 1 |
| 3 | 94452190 | 94465408 | NM_01128 | chr3 | 94459725 | 94460723 | 0.075573 | 1 |
| 3 | 94478623 | 94487212 | NM_17725 | chr3 | 94483164 | 94483804 | 0.074622 | 1 |
| 3 | 96299321 | 96309045 | NM_17821 | chr3 | 96303062 | 96303675 | 0.063136 | 1 |
| 3 | 96725005 | 96733504 | BC115770 | chr3 | 96731674 | 96732547 | 0.102824 | 1 |
| 3 | 96909531 | 96918030 | NM_02151 | chr3 | 96917108 | 96917836 | 0.085765 | 1 |
| 3 | 97111821 | 97120320 | NM_00812 | chr3 | 97118917 | 97119535 | 0.072824 | 1 |
| 3 | 97238188 | 97246941 | NM_01980 | chr3 | 97244954 | 97245561 | 0.069454 | 1 |
| 3 | 98092943 | 98101442 | NM_01092 | chr3 | 98094627 | 98095314 | 0.080941 | 1 |
| 3 | 1.01E+08 | 1.01E+08 | NM_17859 | chr3 | 1.01E+08 | 1.01E+08 | 0.071043 | 1 |
| 3 | 1.02E+08 | 1.02E+08 | NM_14490 | chr3 | 1.02E+08 | 1.02E+08 | 0.079711 | 1 |
| 3 | 1.02E+08 | 1.02E+08 | NM_17877 | chr3 | 1.02E+08 | 1.02E+08 | 0.125246 | 1 |
| 3 | 1.03E+08 | 1.03E+08 | BC011123 | chr3 | 1.03E+08 | 1.03E+08 | 0.090588 | 1 |
| 3 | 1.03E+08 | 1.03E+08 | NM_19865 | chr3 | 1.03E+08 | 1.03E+08 | 0.116118 | 1 |
| 3 | 1.06E+08 | 1.06E+08 | NM_00103 | chr3 | 1.06E+08 | 1.06E+08 | 0.099177 | 1 |
| 3 | 1.07E+08 | 1.07E+08 | NM_17841 | chr3 | 1.07E+08 | 1.07E+08 | 0.087059 | 1 |
| 3 | 1.07E+08 | 1.07E+08 | NM_02601 | chr3 | 1.07E+08 | 1.07E+08 | 0.070334 | 1 |
| 3 | 1.07E+08 | 1.07E+08 | NM_00104 | chr3 | 1.07E+08 | 1.07E+08 | 0.151125 | 1 |
| 3 | 1.08E+08 | 1.08E+08 | NM_13386 | chr3 | 1.08E+08 | 1.08E+08 | 0.073957 | 1 |
| 3 | 1.08E+08 | 1.08E+08 | NM_01997 | chr3 | 1.08E+08 | 1.08E+08 | 0.130118 | 1 |
| 3 | 1.08E+08 | 1.08E+08 | NM_02683 | chr3 | 1.08E+08 | 1.08E+08 | 0.110315 | 1 |
| 3 | 1.09E+08 | 1.09E+08 | NM_17709 | chr3 | 1.09E+08 | 1.09E+08 | 0.085681 | 1 |
| 3 | 1.1E+08  | 1.1E+08  | NM_03069 | chr3 | 1.1E+08  | 1.1E+08  | 0.11555  | 1 |
| 3 | 1.18E+08 | 1.18E+08 | NM_02942 | chr3 | 1.18E+08 | 1.18E+08 | 0.072814 | 1 |
| 3 | 1.23E+08 | 1.23E+08 | NM_15342 | chr3 | 1.23E+08 | 1.23E+08 | 0.071219 | 1 |
| 3 | 1.23E+08 | 1.23E+08 | NM_02150 | chr3 | 1.23E+08 | 1.23E+08 | 0.095871 | 1 |
| 3 | 1.3E+08  | 1.3E+08  | NM_02319 | chr3 | 1.3E+08  | 1.3E+08  | 0.070139 | 1 |
| 3 | 1.3E+08  | 1.3E+08  | NM_19871 | chr3 | 1.3E+08  | 1.3E+08  | 0.100351 | 1 |
| 3 | 1.37E+08 | 1.37E+08 | NM_17766 | chr3 | 1.37E+08 | 1.37E+08 | 0.107882 | 1 |
| 3 | 1.38E+08 | 1.38E+08 | NM_17786 | chr3 | 1.38E+08 | 1.38E+08 | 0.096118 | 1 |
| 3 | 1.42E+08 | 1.43E+08 | NM_01873 | chr3 | 1.42E+08 | 1.42E+08 | 0.064822 | 1 |
| 3 | 1.46E+08 | 1.46E+08 | BC029847 | chr3 | 1.46E+08 | 1.46E+08 | 0.131176 | 1 |
| 3 | 1.47E+08 | 1.47E+08 | NM_02914 | chr3 | 1.47E+08 | 1.47E+08 | 0.071487 | 1 |
| 3 | 1.52E+08 | 1.52E+08 | NM_05717 | chr3 | 1.52E+08 | 1.52E+08 | 0.052749 | 1 |

|   |          |          |          |      |          |          |          |          |
|---|----------|----------|----------|------|----------|----------|----------|----------|
| 3 | 1.52E+08 | 1.52E+08 | NM_02728 | chr3 | 1.52E+08 | 1.52E+08 | 0.003882 | 0.073333 |
| 3 | 1.54E+08 | 1.54E+08 | BC068154 | chr3 | 1.54E+08 | 1.54E+08 | 0.078706 | 1        |
| 3 | 1.54E+08 | 1.54E+08 | BC068154 | chr3 | 1.54E+08 | 1.54E+08 | 0.114118 | 1        |
| 3 | 1.55E+08 | 1.55E+08 | NM_17706 | chr3 | 1.55E+08 | 1.55E+08 | 0.124471 | 1        |
| 3 | 1.6E+08  | 1.6E+08  | NM_02658 | chr3 | 1.6E+08  | 1.6E+08  | 0.087647 | 1        |
| 4 | 3898226  | 3906728  | BC080838 | chr4 | 3903549  | 3904036  | 0.057392 | 1        |
| 4 | 3944230  | 3952810  | NM_18198 | chr4 | 3944773  | 3945469  | 0.081226 | 1        |
| 4 | 3944230  | 3952810  | NM_18198 | chr4 | 3946749  | 3947691  | 0.109894 | 1        |
| 4 | 3944230  | 3952810  | NM_18198 | chr4 | 3950391  | 3951324  | 0.108845 | 1        |
| 4 | 8163663  | 8172188  | NM_00759 | chr4 | 8164173  | 8164821  | 0.07612  | 1        |
| 4 | 10932208 | 10940717 | NM_17517 | chr4 | 10938589 | 10939316 | 0.085546 | 1        |
| 4 | 13705929 | 13714428 | NM_00982 | chr4 | 13712445 | 13713037 | 0.069765 | 1        |
| 4 | 14546064 | 14554904 | NM_14594 | chr4 | 14546181 | 14546971 | 0.08947  | 1        |
| 4 | 15186967 | 15195477 | NM_18140 | chr4 | 15191173 | 15191801 | 0.073904 | 1        |
| 4 | 17774629 | 17783313 | NM_01972 | chr4 | 17776540 | 17777158 | 0.071272 | 1        |
| 4 | 21812536 | 21821108 | NM_01674 | chr4 | 21820146 | 21821014 | 0.101365 | 1        |
| 4 | 25058049 | 25066548 | NM_03073 | chr4 | 25062314 | 25062961 | 0.076235 | 1        |
| 4 | 32938126 | 32946625 | NM_01199 | chr4 | 32939940 | 32940745 | 0.094824 | 1        |
| 4 | 35334942 | 35343441 | NM_19915 | chr4 | 35338263 | 35338851 | 0.069294 | 1        |
| 4 | 41881585 | 41891712 | NM_01667 | chr4 | 41890370 | 41891540 | 0.11562  | 1        |
| 4 | 41979785 | 41988284 | BC051472 | chr4 | 41979837 | 41981381 | 0.181765 | 1        |
| 4 | 41979785 | 41988284 | BC051472 | chr4 | 41985807 | 41986549 | 0.087412 | 1        |
| 4 | 42775779 | 42784278 | NM_01188 | chr4 | 42776851 | 42777377 | 0.062    | 1        |
| 4 | 42775779 | 42784278 | NM_01188 | chr4 | 42781729 | 42782463 | 0.086471 | 1        |
| 4 | 42985046 | 42993559 | NM_02608 | chr4 | 42991810 | 42992611 | 0.094198 | 1        |
| 4 | 43502286 | 43510822 | NM_01943 | chr4 | 43504417 | 43505127 | 0.083285 | 1        |
| 4 | 43719408 | 43733666 | NM_01948 | chr4 | 43721882 | 43722608 | 0.050985 | 1        |
| 4 | 44186053 | 44195439 | NM_00103 | chr4 | 44192311 | 44193344 | 0.110152 | 1        |
| 4 | 44771668 | 44780255 | NM_17702 | chr4 | 44773116 | 44774087 | 0.113181 | 1        |
| 4 | 44939253 | 44949241 | NM_13859 | chr4 | 44945730 | 44946468 | 0.073981 | 1        |
| 4 | 45806022 | 45822717 | NM_02827 | chr4 | 45818538 | 45819181 | 0.038572 | 1        |
| 4 | 46076066 | 46084589 | NM_02188 | chr4 | 46080700 | 46081629 | 0.109104 | 1        |
| 4 | 48294902 | 48303470 | NM_01056 | chr4 | 48299524 | 48300107 | 0.068153 | 1        |
| 4 | 48298097 | 48306689 | NM_02957 | chr4 | 48299524 | 48300107 | 0.067962 | 1        |
| 4 | 52836588 | 52848998 | NM_14685 | chr4 | 52837917 | 52838911 | 0.080171 | 1        |
| 4 | 52985723 | 52994228 | NM_14660 | chr4 | 52991738 | 52992585 | 0.099694 | 1        |
| 4 | 53794805 | 53803334 | NM_00931 | chr4 | 53797267 | 53797940 | 0.079015 | 1        |
| 4 | 56890404 | 56898931 | BC026590 | chr4 | 56890846 | 56891565 | 0.084428 | 1        |
| 4 | 57038979 | 57047478 | NM_17551 | chr4 | 57043856 | 57044446 | 0.069529 | 1        |
| 4 | 58590923 | 58599422 | U48235   | chr4 | 58595260 | 58596393 | 0.133412 | 1        |
| 4 | 58590923 | 58599422 | U48235   | chr4 | 58597632 | 58598559 | 0.109176 | 1        |
| 4 | 60231412 | 60239951 | NM_00864 | chr4 | 60233560 | 60234311 | 0.088056 | 1        |
| 4 | 61914422 | 61927087 | NM_15350 | chr4 | 61926194 | 61926811 | 0.048792 | 1        |
| 4 | 63228949 | 63237474 | NM_17737 | chr4 | 63232001 | 63232639 | 0.074947 | 1        |
| 4 | 65669313 | 65677812 | AF116573 | chr4 | 65670643 | 65671233 | 0.069529 | 1        |
| 4 | 75602208 | 75611113 | NM_00101 | chr4 | 75604181 | 75604842 | 0.074332 | 1        |
| 4 | 75602208 | 75611113 | NM_00101 | chr4 | 75608413 | 75609016 | 0.067819 | 1        |

|   |          |          |          |      |          |          |          |          |
|---|----------|----------|----------|------|----------|----------|----------|----------|
| 4 | 82520899 | 82529398 | AB160986 | chr4 | 82524177 | 82524884 | 0.083294 | 1        |
| 4 | 82520899 | 82529398 | AB160986 | chr4 | 82525210 | 82525975 | 0.090118 | 1        |
| 4 | 85808015 | 85816523 | NM_17254 | chr4 | 85809318 | 85810258 | 0.110589 | 1        |
| 4 | 94225313 | 94233817 | NM_01369 | chr4 | 94226412 | 94227019 | 0.071487 | 1        |
| 4 | 95065479 | 95074020 | NM_02934 | chr4 | 95069852 | 95070476 | 0.073168 | 1        |
| 4 | 95838163 | 95846662 | NM_00100 | chr4 | 95844282 | 95844947 | 0.078353 | 1        |
| 4 | 98516973 | 98525505 | NM_01391 | chr4 | 98518568 | 98519179 | 0.071722 | 1        |
| 4 | 1.01E+08 | 1.01E+08 | BC064460 | chr4 | 1.01E+08 | 1.01E+08 | 0.101412 | 1        |
| 4 | 1.02E+08 | 1.02E+08 | NM_02610 | chr4 | 1.02E+08 | 1.02E+08 | 0.066753 | 1        |
| 4 | 1.06E+08 | 1.06E+08 | NM_14614 | chr4 | 1.06E+08 | 1.06E+08 | 0.072864 | 1        |
| 4 | 1.08E+08 | 1.08E+08 | NM_02672 | chr4 | 1.08E+08 | 1.08E+08 | 0.037938 | 1        |
| 4 | 1.08E+08 | 1.08E+08 | NM_17269 | chr4 | 1.08E+08 | 1.08E+08 | 0.042297 | 1        |
| 4 | 1.08E+08 | 1.08E+08 | NM_01101 | chr4 | 1.08E+08 | 1.08E+08 | 0.068927 | 1        |
| 4 | 1.09E+08 | 1.09E+08 | NM_13388 | chr4 | 1.09E+08 | 1.09E+08 | 0.075765 | 1        |
| 4 | 1.11E+08 | 1.11E+08 | BC051512 | chr4 | 1.11E+08 | 1.11E+08 | 0.099647 | 1        |
| 4 | 1.15E+08 | 1.15E+08 | AF499446 | chr4 | 1.15E+08 | 1.15E+08 | 0.066079 | 1        |
| 4 | 1.17E+08 | 1.17E+08 | AF178961 | chr4 | 1.17E+08 | 1.17E+08 | 0.079882 | 1        |
| 4 | 1.17E+08 | 1.17E+08 | NM_00813 | chr4 | 1.17E+08 | 1.17E+08 | 0.067876 | 1        |
| 4 | 1.18E+08 | 1.18E+08 | NM_00103 | chr4 | 1.18E+08 | 1.18E+08 | 0.08241  | 1        |
| 4 | 1.18E+08 | 1.18E+08 | NM_14630 | chr4 | 1.18E+08 | 1.18E+08 | 0.07     | 1        |
| 4 | 1.18E+08 | 1.18E+08 | NM_14630 | chr4 | 1.18E+08 | 1.18E+08 | 0.077647 | 1        |
| 4 | 1.18E+08 | 1.18E+08 | NM_20715 | chr4 | 1.18E+08 | 1.18E+08 | 0.160941 | 1        |
| 4 | 1.18E+08 | 1.18E+08 | NM_14633 | chr4 | 1.18E+08 | 1.18E+08 | 0.066471 | 1        |
| 4 | 1.18E+08 | 1.18E+08 | NM_20757 | chr4 | 1.18E+08 | 1.18E+08 | 0.183176 | 1        |
| 4 | 1.19E+08 | 1.19E+08 | NM_15310 | chr4 | 1.19E+08 | 1.19E+08 | 0.070612 | 1        |
| 4 | 1.19E+08 | 1.19E+08 | NM_17757 | chr4 | 1.19E+08 | 1.19E+08 | 0.093529 | 1        |
| 4 | 1.19E+08 | 1.19E+08 | NM_00100 | chr4 | 1.19E+08 | 1.19E+08 | 0.045607 | 1        |
| 4 | 1.19E+08 | 1.19E+08 | NM_17269 | chr4 | 1.19E+08 | 1.19E+08 | 0.084706 | 1        |
| 4 | 1.2E+08  | 1.2E+08  | AB029329 | chr4 | 1.2E+08  | 1.2E+08  | 0.046964 | 1        |
| 4 | 1.22E+08 | 1.22E+08 | BC099945 | chr4 | 1.22E+08 | 1.22E+08 | 0.100353 | 1        |
| 4 | 1.23E+08 | 1.23E+08 | NM_00755 | chr4 | 1.23E+08 | 1.23E+08 | 0.077728 | 1        |
| 4 | 1.23E+08 | 1.23E+08 | NM_18316 | chr4 | 1.23E+08 | 1.23E+08 | 0.082425 | 1        |
| 4 | 1.24E+08 | 1.24E+08 | NM_17767 | chr4 | 1.24E+08 | 1.24E+08 | 0.077728 | 1        |
| 4 | 1.27E+08 | 1.27E+08 | NM_01029 | chr4 | 1.27E+08 | 1.27E+08 | 0.084108 | 1        |
| 4 | 1.28E+08 | 1.28E+08 | NM_02703 | chr4 | 1.28E+08 | 1.28E+08 | 0.104211 | 1        |
| 4 | 1.28E+08 | 1.28E+08 | NM_17775 | chr4 | 1.28E+08 | 1.28E+08 | 0.05183  | 0.780804 |
| 4 | 1.28E+08 | 1.28E+08 | BC057571 | chr4 | 1.28E+08 | 1.28E+08 | 0.131294 | 1        |
| 4 | 1.28E+08 | 1.28E+08 | BC057571 | chr4 | 1.28E+08 | 1.28E+08 | 0.109529 | 1        |
| 4 | 1.28E+08 | 1.28E+08 | NM_01877 | chr4 | 1.28E+08 | 1.28E+08 | 0.100471 | 1        |
| 4 | 1.28E+08 | 1.28E+08 | BC071246 | chr4 | 1.28E+08 | 1.28E+08 | 0.044209 | 1        |
| 4 | 1.29E+08 | 1.29E+08 | NM_01069 | chr4 | 1.29E+08 | 1.29E+08 | 0.072118 | 1        |
| 4 | 1.29E+08 | 1.29E+08 | NM_18278 | chr4 | 1.29E+08 | 1.29E+08 | 0.05022  | 1        |
| 4 | 1.29E+08 | 1.29E+08 | NM_17307 | chr4 | 1.29E+08 | 1.29E+08 | 0.104235 | 1        |
| 4 | 1.3E+08  | 1.3E+08  | NM_19895 | chr4 | 1.3E+08  | 1.3E+08  | 0.072727 | 1        |
| 4 | 1.3E+08  | 1.3E+08  | NM_17270 | chr4 | 1.3E+08  | 1.3E+08  | 0.097229 | 1        |
| 4 | 1.3E+08  | 1.3E+08  | NM_01076 | chr4 | 1.3E+08  | 1.3E+08  | 0.087425 | 0.988079 |
| 4 | 1.32E+08 | 1.32E+08 | NM_13388 | chr4 | 1.32E+08 | 1.32E+08 | 0.099918 | 1        |

|   |          |          |          |      |          |          |          |          |
|---|----------|----------|----------|------|----------|----------|----------|----------|
| 4 | 1.33E+08 | 1.33E+08 | NM_01370 | chr4 | 1.33E+08 | 1.33E+08 | 0.071086 | 1        |
| 4 | 1.35E+08 | 1.35E+08 | NM_02298 | chr4 | 1.35E+08 | 1.35E+08 | 0.036477 | 1        |
| 4 | 1.35E+08 | 1.35E+08 | NM_00101 | chr4 | 1.35E+08 | 1.35E+08 | 0.081765 | 1        |
| 4 | 1.37E+08 | 1.37E+08 | M77174   | chr4 | 1.37E+08 | 1.37E+08 | 0.087412 | 1        |
| 4 | 1.37E+08 | 1.37E+08 | NM_00743 | chr4 | 1.37E+08 | 1.37E+08 | 0.0748   | 1        |
| 4 | 1.4E+08  | 1.4E+08  | NM_01106 | chr4 | 1.4E+08  | 1.4E+08  | 0.080118 | 1        |
| 4 | 1.4E+08  | 1.4E+08  | NM_00854 | chr4 | 1.4E+08  | 1.4E+08  | 0.069717 | 1        |
| 4 | 1.41E+08 | 1.41E+08 | BC006954 | chr4 | 1.41E+08 | 1.41E+08 | 0.095765 | 1        |
| 4 | 1.47E+08 | 1.47E+08 | BC010268 | chr4 | 1.47E+08 | 1.47E+08 | 0.070118 | 1        |
| 4 | 1.47E+08 | 1.47E+08 | NM_00872 | chr4 | 1.47E+08 | 1.47E+08 | 0.069168 | 1        |
| 4 | 1.49E+08 | 1.49E+08 | BC089357 | chr4 | 1.49E+08 | 1.49E+08 | 0.06996  | 1        |
| 4 | 1.51E+08 | 1.51E+08 | NM_02872 | chr4 | 1.51E+08 | 1.51E+08 | 0.072563 | 1        |
| 4 | 1.51E+08 | 1.51E+08 | NM_03186 | chr4 | 1.51E+08 | 1.51E+08 | 0.071928 | 1        |
| 4 | 1.51E+08 | 1.51E+08 | NM_00103 | chr4 | 1.51E+08 | 1.51E+08 | 0.053529 | 1        |
| 4 | 1.51E+08 | 1.51E+08 | NM_00907 | chr4 | 1.51E+08 | 1.51E+08 | 0.044373 | 1        |
| 4 | 1.51E+08 | 1.51E+08 | BC098195 | chr4 | 1.51E+08 | 1.51E+08 | 0.055395 | 1        |
| 4 | 1.51E+08 | 1.51E+08 | L48983   | chr4 | 1.51E+08 | 1.51E+08 | 0.073529 | 1        |
| 4 | 1.51E+08 | 1.51E+08 | L48983   | chr4 | 1.51E+08 | 1.51E+08 | 0.064706 | 1        |
| 4 | 1.53E+08 | 1.53E+08 | BC066045 | chr4 | 1.53E+08 | 1.53E+08 | 0.131765 | 1        |
| 4 | 1.53E+08 | 1.53E+08 | BC039980 | chr4 | 1.53E+08 | 1.53E+08 | 0.080484 | 1        |
| 4 | 1.54E+08 | 1.54E+08 | NM_02851 | chr4 | 1.54E+08 | 1.54E+08 | 0.139529 | 1        |
| 4 | 1.54E+08 | 1.54E+08 | NM_02851 | chr4 | 1.54E+08 | 1.54E+08 | 0.071529 | 1        |
| 4 | 1.55E+08 | 1.55E+08 | NM_08044 | chr4 | 1.55E+08 | 1.55E+08 | 0.096941 | 1        |
| 5 | 3806432  | 3814931  | NM_00100 | chr5 | 3813747  | 3814570  | 0.096941 | 1        |
| 5 | 8056581  | 8065080  | BC065790 | chr5 | 8061255  | 8061951  | 0.082    | 1        |
| 5 | 19413596 | 19422184 | AB029485 | chr5 | 19415738 | 19416558 | 0.095587 | 1        |
| 5 | 24726958 | 24735481 | NM_14490 | chr5 | 24727631 | 24728239 | 0.071445 | 1        |
| 5 | 26433602 | 26442101 | NM_20765 | chr5 | 26440257 | 26440890 | 0.074588 | 1        |
| 5 | 27374180 | 27382679 | NM_20728 | chr5 | 27381479 | 27382206 | 0.085647 | 1        |
| 5 | 27586871 | 27595370 | BC048383 | chr5 | 27594537 | 27595181 | 0.075882 | 1        |
| 5 | 29806758 | 29818418 | NM_01994 | chr5 | 29814567 | 29815181 | 0.05274  | 1        |
| 5 | 30337931 | 30346447 | NM_03116 | chr5 | 30339952 | 30340601 | 0.076318 | 1        |
| 5 | 31219562 | 31228061 | BC023116 | chr5 | 31220372 | 31221278 | 0.106706 | 1        |
| 5 | 31220653 | 31229152 | NM_02130 | chr5 | 31220372 | 31221278 | 0.073647 | 0.690187 |
| 5 | 33415076 | 33423607 | NM_01981 | chr5 | 33415211 | 33416257 | 0.122714 | 1        |
| 5 | 33531823 | 33541040 | NM_13390 | chr5 | 33532851 | 33533464 | 0.066609 | 1        |
| 5 | 33531823 | 33541040 | NM_13390 | chr5 | 33535221 | 33536215 | 0.107941 | 1        |
| 5 | 36204180 | 36212679 | NM_02737 | chr5 | 36207759 | 36208543 | 0.092353 | 1        |
| 5 | 36886635 | 36907919 | NM_13391 | chr5 | 36896722 | 36897312 | 0.027766 | 1        |
| 5 | 37333165 | 37341664 | NM_17839 | chr5 | 37335035 | 37335653 | 0.072824 | 1        |
| 5 | 37333165 | 37341664 | NM_17839 | chr5 | 37337952 | 37338583 | 0.074353 | 1        |
| 5 | 37524329 | 37536767 | NM_00776 | chr5 | 37525410 | 37526315 | 0.072835 | 1        |
| 5 | 37620736 | 37629256 | NM_14592 | chr5 | 37623913 | 37624624 | 0.083558 | 1        |
| 5 | 37622611 | 37631115 | NM_02129 | chr5 | 37623913 | 37624624 | 0.083716 | 1        |
| 5 | 38002813 | 38011388 | NM_02241 | chr5 | 38009108 | 38009928 | 0.095732 | 1        |
| 5 | 39930343 | 39938842 | BC009133 | chr5 | 39934440 | 39935046 | 0.071412 | 1        |
| 5 | 39930343 | 39938842 | BC009133 | chr5 | 39936771 | 39937633 | 0.101529 | 1        |

|   |          |          |          |      |          |          |          |          |
|---|----------|----------|----------|------|----------|----------|----------|----------|
| 5 | 44107387 | 44115886 | BC047214 | chr5 | 44112712 | 44113346 | 0.074706 | 1        |
| 5 | 53993273 | 54002350 | NM_00982 | chr5 | 53994525 | 53995236 | 0.078431 | 1        |
| 5 | 65429205 | 65437704 | BC026739 | chr5 | 65432219 | 65433099 | 0.103647 | 1        |
| 5 | 66136036 | 66144535 | BC094937 | chr5 | 66137848 | 66138938 | 0.128353 | 1        |
| 5 | 66579030 | 66587529 | AY650904 | chr5 | 66580959 | 66582115 | 0.136118 | 1        |
| 5 | 66579030 | 66587529 | AY650904 | chr5 | 66586549 | 66587391 | 0.099177 | 1        |
| 5 | 67375762 | 67384261 | NM_00888 | chr5 | 67381009 | 67381955 | 0.111412 | 1        |
| 5 | 71372236 | 71380984 | NM_00806 | chr5 | 71379706 | 71380318 | 0.070065 | 1        |
| 5 | 72895771 | 72904270 | M84742   | chr5 | 72895861 | 72896492 | 0.074353 | 1        |
| 5 | 72914478 | 72927887 | NM_00772 | chr5 | 72923596 | 72924181 | 0.043699 | 1        |
| 5 | 72920931 | 72929493 | BC125449 | chr5 | 72923596 | 72924181 | 0.068434 | 1        |
| 5 | 73029377 | 73037912 | U16145   | chr5 | 73036290 | 73036928 | 0.074859 | 1        |
| 5 | 73280039 | 73288538 | NM_17340 | chr5 | 73280782 | 73281395 | 0.072235 | 1        |
| 5 | 73830404 | 73838903 | BC031793 | chr5 | 73830424 | 73831065 | 0.075529 | 1        |
| 5 | 78072830 | 78081329 | NM_20693 | chr5 | 78078636 | 78079069 | 0.051059 | 1        |
| 5 | 87590639 | 87599161 | NM_17716 | chr5 | 87597511 | 87598552 | 0.122257 | 1        |
| 5 | 87889836 | 87899679 | BC048817 | chr5 | 87892114 | 87892765 | 0.066233 | 1        |
| 5 | 90003308 | 90011807 | NM_01876 | chr5 | 90005630 | 90006418 | 0.092824 | 1        |
| 5 | 91837718 | 91850212 | NM_02378 | chr5 | 91842728 | 91843682 | 0.076431 | 1        |
| 5 | 92475520 | 92484113 | NM_00756 | chr5 | 92475518 | 92476181 | 0.077031 | 0.996988 |
| 5 | 92475520 | 92484113 | NM_00756 | chr5 | 92477205 | 92477820 | 0.071678 | 1        |
| 5 | 93421551 | 93430079 | NM_02127 | chr5 | 93424137 | 93425236 | 0.128972 | 1        |
| 5 | 93457343 | 93465842 | NM_18172 | chr5 | 93462367 | 93462950 | 0.068706 | 1        |
| 5 | 95707855 | 95724394 | BC099941 | chr5 | 95719935 | 95720785 | 0.051451 | 1        |
| 5 | 1E+08    | 1E+08    | NM_18284 | chr5 | 1E+08    | 1E+08    | 0.068693 | 1        |
| 5 | 1.03E+08 | 1.03E+08 | AB005665 | chr5 | 1.03E+08 | 1.03E+08 | 0.100471 | 1        |
| 5 | 1.04E+08 | 1.04E+08 | NM_19803 | chr5 | 1.04E+08 | 1.04E+08 | 0.129412 | 1        |
| 5 | 1.04E+08 | 1.04E+08 | NM_19803 | chr5 | 1.04E+08 | 1.04E+08 | 0.076706 | 1        |
| 5 | 1.04E+08 | 1.04E+08 | NM_01008 | chr5 | 1.04E+08 | 1.04E+08 | 0.086967 | 1        |
| 5 | 1.04E+08 | 1.04E+08 | NM_01677 | chr5 | 1.04E+08 | 1.04E+08 | 0.031477 | 1        |
| 5 | 1.05E+08 | 1.05E+08 | NM_00926 | chr5 | 1.05E+08 | 1.05E+08 | 0.084432 | 1        |
| 5 | 1.05E+08 | 1.05E+08 | BC020078 | chr5 | 1.05E+08 | 1.05E+08 | 0.077059 | 1        |
| 5 | 1.07E+08 | 1.07E+08 | BC030844 | chr5 | 1.07E+08 | 1.07E+08 | 0.088706 | 1        |
| 5 | 1.08E+08 | 1.08E+08 | NM_01157 | chr5 | 1.08E+08 | 1.08E+08 | 0.072231 | 1        |
| 5 | 1.1E+08  | 1.1E+08  | NM_14514 | chr5 | 1.1E+08  | 1.1E+08  | 0.055646 | 1        |
| 5 | 1.1E+08  | 1.1E+08  | BC007165 | chr5 | 1.1E+08  | 1.1E+08  | 0.064235 | 1        |
| 5 | 1.12E+08 | 1.12E+08 | NM_02135 | chr5 | 1.12E+08 | 1.12E+08 | 0.071613 | 1        |
| 5 | 1.13E+08 | 1.13E+08 | DQ167195 | chr5 | 1.13E+08 | 1.13E+08 | 0.068772 | 1        |
| 5 | 1.13E+08 | 1.13E+08 | NM_00777 | chr5 | 1.13E+08 | 1.13E+08 | 0.077454 | 1        |
| 5 | 1.14E+08 | 1.14E+08 | NM_02552 | chr5 | 1.14E+08 | 1.14E+08 | 0.044579 | 1        |
| 5 | 1.14E+08 | 1.14E+08 | NM_14616 | chr5 | 1.14E+08 | 1.14E+08 | 0.06918  | 1        |
| 5 | 1.21E+08 | 1.21E+08 | NM_03354 | chr5 | 1.21E+08 | 1.21E+08 | 0.053712 | 1        |
| 5 | 1.21E+08 | 1.21E+08 | NM_01185 | chr5 | 1.21E+08 | 1.21E+08 | 0.076905 | 1        |
| 5 | 1.21E+08 | 1.21E+08 | NM_03354 | chr5 | 1.21E+08 | 1.21E+08 | 0.056246 | 1        |
| 5 | 1.21E+08 | 1.21E+08 | NM_01185 | chr5 | 1.21E+08 | 1.21E+08 | 0.080534 | 1        |
| 5 | 1.21E+08 | 1.21E+08 | NM_03354 | chr5 | 1.21E+08 | 1.21E+08 | 0.065402 | 1        |
| 5 | 1.21E+08 | 1.21E+08 | NM_01185 | chr5 | 1.21E+08 | 1.21E+08 | 0.093644 | 1        |

|   |          |          |          |      |          |          |          |          |
|---|----------|----------|----------|------|----------|----------|----------|----------|
| 5 | 1.21E+08 | 1.21E+08 | NM_03354 | chr5 | 1.21E+08 | 1.21E+08 | 0.050278 | 1        |
| 5 | 1.21E+08 | 1.21E+08 | NM_01185 | chr5 | 1.21E+08 | 1.21E+08 | 0.071989 | 1        |
| 5 | 1.21E+08 | 1.21E+08 | NM_01185 | chr5 | 1.21E+08 | 1.21E+08 | 0.071387 | 1        |
| 5 | 1.21E+08 | 1.21E+08 | BC003980 | chr5 | 1.21E+08 | 1.21E+08 | 0.077294 | 1        |
| 5 | 1.22E+08 | 1.22E+08 | NM_02822 | chr5 | 1.22E+08 | 1.22E+08 | 0.053601 | 1        |
| 5 | 1.22E+08 | 1.22E+08 | NM_02803 | chr5 | 1.22E+08 | 1.22E+08 | 0.091016 | 1        |
| 5 | 1.23E+08 | 1.23E+08 | NM_00103 | chr5 | 1.23E+08 | 1.23E+08 | 0.107882 | 1        |
| 5 | 1.26E+08 | 1.26E+08 | NM_20331 | chr5 | 1.26E+08 | 1.26E+08 | 0.075722 | 1        |
| 5 | 1.26E+08 | 1.26E+08 | NM_02975 | chr5 | 1.26E+08 | 1.26E+08 | 0.00397  | 0.052713 |
| 5 | 1.36E+08 | 1.36E+08 | NM_17875 | chr5 | 1.36E+08 | 1.36E+08 | 0.085141 | 1        |
| 5 | 1.37E+08 | 1.37E+08 | NM_02171 | chr5 | 1.37E+08 | 1.37E+08 | 0.081992 | 1        |
| 5 | 1.38E+08 | 1.38E+08 | NM_01579 | chr5 | 1.38E+08 | 1.38E+08 | 0.092931 | 1        |
| 5 | 1.38E+08 | 1.38E+08 | NM_00101 | chr5 | 1.38E+08 | 1.38E+08 | 0.058471 | 1        |
| 5 | 1.38E+08 | 1.38E+08 | NM_00101 | chr5 | 1.38E+08 | 1.38E+08 | 0.089294 | 1        |
| 5 | 1.38E+08 | 1.38E+08 | NM_00101 | chr5 | 1.38E+08 | 1.38E+08 | 0.058941 | 1        |
| 5 | 1.39E+08 | 1.39E+08 | NM_00103 | chr5 | 1.39E+08 | 1.39E+08 | 0.037604 | 1        |
| 5 | 1.39E+08 | 1.39E+08 | NM_01696 | chr5 | 1.39E+08 | 1.39E+08 | 0.069412 | 1        |
| 5 | 1.39E+08 | 1.39E+08 | NM_02969 | chr5 | 1.39E+08 | 1.39E+08 | 0.106941 | 1        |
| 5 | 1.39E+08 | 1.39E+08 | NM_02969 | chr5 | 1.39E+08 | 1.39E+08 | 0.118118 | 1        |
| 5 | 1.39E+08 | 1.39E+08 | NM_03056 | chr5 | 1.39E+08 | 1.39E+08 | 0.083119 | 1        |
| 5 | 1.43E+08 | 1.43E+08 | NM_01994 | chr5 | 1.43E+08 | 1.43E+08 | 0.09614  | 1        |
| 5 | 1.44E+08 | 1.44E+08 | NM_02573 | chr5 | 1.44E+08 | 1.44E+08 | 0.11784  | 1        |
| 5 | 1.45E+08 | 1.45E+08 | BC050105 | chr5 | 1.45E+08 | 1.45E+08 | 0.104353 | 1        |
| 5 | 1.46E+08 | 1.46E+08 | NM_00100 | chr5 | 1.46E+08 | 1.46E+08 | 0.088    | 1        |
| 5 | 1.47E+08 | 1.47E+08 | NM_00101 | chr5 | 1.47E+08 | 1.47E+08 | 0.06481  | 1        |
| 5 | 1.47E+08 | 1.47E+08 | BC049274 | chr5 | 1.47E+08 | 1.47E+08 | 0.063765 | 1        |
| 5 | 1.48E+08 | 1.48E+08 | BC082547 | chr5 | 1.48E+08 | 1.48E+08 | 0.071647 | 1        |
| 5 | 1.48E+08 | 1.48E+08 | NM_02562 | chr5 | 1.48E+08 | 1.48E+08 | 0.075567 | 1        |
| 5 | 1.49E+08 | 1.49E+08 | NM_01190 | chr5 | 1.49E+08 | 1.49E+08 | 0.101501 | 1        |
| 5 | 1.49E+08 | 1.49E+08 | NM_00101 | chr5 | 1.49E+08 | 1.49E+08 | 0.049579 | 1        |
| 5 | 1.5E+08  | 1.5E+08  | NM_02751 | chr5 | 1.5E+08  | 1.5E+08  | 0.071088 | 1        |
| 5 | 1.5E+08  | 1.5E+08  | NM_08046 | chr5 | 1.5E+08  | 1.5E+08  | 0.122846 | 1        |
| 6 | 3915855  | 3924359  | NM_00936 | chr6 | 3917120  | 3918054  | 0.109935 | 1        |
| 6 | 3947987  | 3956486  | NM_02533 | chr6 | 3949544  | 3950342  | 0.094    | 1        |
| 6 | 5057428  | 5065927  | BC048729 | chr6 | 5064063  | 5064739  | 0.079647 | 1        |
| 6 | 5178331  | 5186830  | BC005714 | chr6 | 5186006  | 5186796  | 0.093059 | 1        |
| 6 | 5669808  | 5678410  | NM_01006 | chr6 | 5677865  | 5678377  | 0.05963  | 1        |
| 6 | 8702253  | 8710752  | U26460   | chr6 | 8702344  | 8703198  | 0.100588 | 1        |
| 6 | 8725596  | 8734107  | NM_01049 | chr6 | 8726916  | 8727683  | 0.090226 | 1        |
| 6 | 11854910 | 11863450 | NM_01088 | chr6 | 11862783 | 11863408 | 0.073294 | 1        |
| 6 | 17581015 | 17589601 | NM_00760 | chr6 | 17582452 | 17583161 | 0.082683 | 1        |
| 6 | 21160110 | 21168609 | NM_01969 | chr6 | 21162486 | 21163445 | 0.112941 | 1        |
| 6 | 28073706 | 28090379 | NM_00817 | chr6 | 28080785 | 28081448 | 0.039823 | 1        |
| 6 | 29102602 | 29120679 | NM_13392 | chr6 | 29106658 | 29107493 | 0.046244 | 1        |
| 6 | 29263150 | 29271649 | NM_20725 | chr6 | 29267683 | 29268295 | 0.072118 | 1        |
| 6 | 30512379 | 30520885 | NM_02792 | chr6 | 30515853 | 30516692 | 0.098742 | 1        |
| 6 | 30512379 | 30520885 | NM_02792 | chr6 | 30519299 | 30520215 | 0.107794 | 1        |

|   |          |          |          |      |          |          |          |   |
|---|----------|----------|----------|------|----------|----------|----------|---|
| 6 | 30555020 | 30563519 | NM_14453 | chr6 | 30559165 | 30559770 | 0.071294 | 1 |
| 6 | 30841395 | 30851736 | NM_05407 | chr6 | 30849200 | 30849810 | 0.05908  | 1 |
| 6 | 31974448 | 31982964 | NM_02958 | chr6 | 31978510 | 31979113 | 0.070917 | 1 |
| 6 | 34844315 | 34853668 | NM_00929 | chr6 | 34849478 | 34850095 | 0.066068 | 1 |
| 6 | 35235756 | 35244278 | NM_17289 | chr6 | 35237589 | 35238934 | 0.157926 | 1 |
| 6 | 35235756 | 35244278 | NM_17289 | chr6 | 35240572 | 35241164 | 0.069576 | 1 |
| 6 | 35253763 | 35262293 | NM_17337 | chr6 | 35256309 | 35257257 | 0.111241 | 1 |
| 6 | 35253763 | 35262293 | NM_17337 | chr6 | 35257565 | 35258546 | 0.11511  | 1 |
| 6 | 37369219 | 37377747 | NM_17866 | chr6 | 37374954 | 37375818 | 0.101419 | 1 |
| 6 | 37453781 | 37462280 | NM_14536 | chr6 | 37455448 | 37456321 | 0.102824 | 1 |
| 6 | 38051489 | 38060182 | NM_08046 | chr6 | 38053281 | 38053890 | 0.070163 | 1 |
| 6 | 39516181 | 39524691 | NM_02661 | chr6 | 39522926 | 39523699 | 0.090941 | 1 |
| 6 | 39571490 | 39579989 | AF454556 | chr6 | 39577605 | 39578231 | 0.073765 | 1 |
| 6 | 40033860 | 40042359 | NM_00100 | chr6 | 40040167 | 40041174 | 0.118588 | 1 |
| 6 | 40494964 | 40503463 | NM_14638 | chr6 | 40501231 | 40502045 | 0.095882 | 1 |
| 6 | 40970947 | 40980469 | M16122   | chr6 | 40976345 | 40977427 | 0.113725 | 1 |
| 6 | 41225876 | 41234378 | NM_01164 | chr6 | 41233387 | 41234352 | 0.113607 | 1 |
| 6 | 41461824 | 41475330 | BC034887 | chr6 | 41473918 | 41474821 | 0.066928 | 1 |
| 6 | 42835132 | 42843631 | NM_14698 | chr6 | 42841775 | 42842389 | 0.072353 | 1 |
| 6 | 43125253 | 43133752 | NM_14665 | chr6 | 43131724 | 43132473 | 0.088235 | 1 |
| 6 | 47876987 | 47885597 | NM_17889 | chr6 | 47881041 | 47881753 | 0.082801 | 1 |
| 6 | 48635283 | 48643830 | NM_15317 | chr6 | 48636804 | 48637363 | 0.065512 | 1 |
| 6 | 48662633 | 48678381 | NM_17503 | chr6 | 48672147 | 48673024 | 0.05575  | 1 |
| 6 | 48910447 | 48919075 | NM_17288 | chr6 | 48917306 | 48917963 | 0.076255 | 1 |
| 6 | 50188856 | 50199448 | NM_01876 | chr6 | 50193419 | 50194280 | 0.081375 | 1 |
| 6 | 53528040 | 53536539 | BC029022 | chr6 | 53528653 | 53529379 | 0.085529 | 1 |
| 6 | 53747773 | 53756272 | NM_02581 | chr6 | 53751545 | 53752151 | 0.071412 | 1 |
| 6 | 54357300 | 54365799 | NM_19811 | chr6 | 54358147 | 54358746 | 0.070588 | 1 |
| 6 | 54961579 | 54970097 | NM_18067 | chr6 | 54962407 | 54963418 | 0.118793 | 1 |
| 6 | 55260010 | 55268523 | NM_00747 | chr6 | 55266738 | 55267513 | 0.091144 | 1 |
| 6 | 55375558 | 55384372 | NM_00740 | chr6 | 55383586 | 55384347 | 0.086444 | 1 |
| 6 | 58951581 | 58960080 | NM_15357 | chr6 | 58958109 | 58958692 | 0.068706 | 1 |
| 6 | 65071777 | 65080486 | NM_01945 | chr6 | 65073195 | 65073792 | 0.068657 | 1 |
| 6 | 65513976 | 65522672 | NM_00100 | chr6 | 65518217 | 65519628 | 0.162355 | 1 |
| 6 | 66704209 | 66712708 | NM_13416 | chr6 | 66711082 | 66711680 | 0.070471 | 1 |
| 6 | 70646143 | 70658513 | BC092064 | chr6 | 70647643 | 70648631 | 0.079945 | 1 |
| 6 | 70646143 | 70658513 | BC092064 | chr6 | 70649241 | 70649896 | 0.053027 | 1 |
| 6 | 71249243 | 71257742 | U76371   | chr6 | 71255467 | 71256171 | 0.082941 | 1 |
| 6 | 72467948 | 72487279 | NM_00104 | chr6 | 72473029 | 72473721 | 0.035847 | 1 |
| 6 | 78305855 | 78314374 | NM_01389 | chr6 | 78313411 | 78314088 | 0.079578 | 1 |
| 6 | 82362133 | 82370944 | NM_00931 | chr6 | 82365894 | 82367236 | 0.152406 | 1 |
| 6 | 83490638 | 83507890 | NM_00961 | chr6 | 83490990 | 83491967 | 0.056686 | 1 |
| 6 | 83490638 | 83507890 | NM_00961 | chr6 | 83503767 | 83504323 | 0.032284 | 1 |
| 6 | 83619235 | 83627774 | NM_01675 | chr6 | 83626564 | 83627156 | 0.069438 | 1 |
| 6 | 83722302 | 83730801 | NM_02924 | chr6 | 83727276 | 83727811 | 0.063059 | 1 |
| 6 | 83943541 | 83952040 | BC002281 | chr6 | 83948661 | 83949267 | 0.071412 | 1 |
| 6 | 85296578 | 85305077 | NM_17863 | chr6 | 85300373 | 85301459 | 0.127882 | 1 |

|   |          |          |          |      |          |          |          |          |
|---|----------|----------|----------|------|----------|----------|----------|----------|
| 6 | 85383587 | 85400146 | NM_14491 | chr6 | 85398418 | 85399409 | 0.059903 | 1        |
| 6 | 85466045 | 85474652 | NM_00100 | chr6 | 85466913 | 85467962 | 0.12198  | 1        |
| 6 | 85794994 | 85803740 | NM_02345 | chr6 | 85798339 | 85798953 | 0.07031  | 1        |
| 6 | 85868019 | 85876518 | NM_02933 | chr6 | 85872405 | 85873187 | 0.092118 | 1        |
| 6 | 85976825 | 85985324 | NM_01201 | chr6 | 85983517 | 85984108 | 0.069647 | 1        |
| 6 | 86222834 | 86231333 | BC031432 | chr6 | 86225740 | 86226792 | 0.123882 | 1        |
| 6 | 87332991 | 87341509 | NM_02546 | chr6 | 87339033 | 87339940 | 0.106585 | 1        |
| 6 | 87352070 | 87360569 | NM_02686 | chr6 | 87358666 | 87359303 | 0.075059 | 1        |
| 6 | 87388674 | 87397173 | NM_00975 | chr6 | 87392468 | 87393525 | 0.124471 | 1        |
| 6 | 89705928 | 89714485 | NM_05323 | chr6 | 89711840 | 89712513 | 0.078757 | 1        |
| 6 | 89935675 | 89944174 | NM_05322 | chr6 | 89941287 | 89941889 | 0.070941 | 1        |
| 6 | 90187443 | 90195942 | NM_05322 | chr6 | 90189346 | 90189956 | 0.071882 | 1        |
| 6 | 90564384 | 90572967 | NM_02786 | chr6 | 90566088 | 90566801 | 0.083178 | 1        |
| 6 | 91938382 | 91955113 | NM_17273 | chr6 | 91949282 | 91950193 | 0.054506 | 1        |
| 6 | 95681753 | 95690261 | NM_01150 | chr6 | 95688295 | 95688913 | 0.072747 | 1        |
| 6 | 97274984 | 97283483 | BC058262 | chr6 | 97282649 | 97283183 | 0.062941 | 1        |
| 6 | 99629730 | 99638234 | NM_02582 | chr6 | 99635709 | 99636464 | 0.088889 | 1        |
| 6 | 99652142 | 99660641 | NM_00815 | chr6 | 99654238 | 99654763 | 0.061882 | 1        |
| 6 | 99841357 | 99849856 | BC092381 | chr6 | 99842890 | 99843584 | 0.081765 | 1        |
| 6 | 99841357 | 99849856 | BC092381 | chr6 | 99847730 | 99848370 | 0.075412 | 1        |
| 6 | 1.01E+08 | 1.01E+08 | BC094903 | chr6 | 1.01E+08 | 1.01E+08 | 0.067027 | 1        |
| 6 | 1.01E+08 | 1.01E+08 | BC010329 | chr6 | 1.01E+08 | 1.01E+08 | 0.108118 | 1        |
| 6 | 1.08E+08 | 1.08E+08 | NM_01873 | chr6 | 1.08E+08 | 1.08E+08 | 0.121194 | 1        |
| 6 | 1.08E+08 | 1.08E+08 | NM_01058 | chr6 | 1.08E+08 | 1.08E+08 | 0.130353 | 1        |
| 6 | 1.12E+08 | 1.12E+08 | NM_17552 | chr6 | 1.12E+08 | 1.12E+08 | 0.105517 | 1        |
| 6 | 1.13E+08 | 1.13E+08 | AF496547 | chr6 | 1.13E+08 | 1.13E+08 | 0.129289 | 1        |
| 6 | 1.13E+08 | 1.13E+08 | AF496547 | chr6 | 1.13E+08 | 1.13E+08 | 0.068513 | 1        |
| 6 | 1.13E+08 | 1.13E+08 | BC083184 | chr6 | 1.13E+08 | 1.13E+08 | 0.076471 | 1        |
| 6 | 1.17E+08 | 1.17E+08 | NM_00101 | chr6 | 1.17E+08 | 1.17E+08 | 0.084824 | 1        |
| 6 | 1.17E+08 | 1.17E+08 | NM_14644 | chr6 | 1.17E+08 | 1.17E+08 | 0.079765 | 0.994135 |
| 6 | 1.17E+08 | 1.17E+08 | NM_14644 | chr6 | 1.17E+08 | 1.17E+08 | 0.075294 | 1        |
| 6 | 1.17E+08 | 1.17E+08 | NM_02605 | chr6 | 1.17E+08 | 1.17E+08 | 0.058255 | 1        |
| 6 | 1.17E+08 | 1.17E+08 | NM_17876 | chr6 | 1.17E+08 | 1.17E+08 | 0.100012 | 1        |
| 6 | 1.18E+08 | 1.18E+08 | NM_00100 | chr6 | 1.18E+08 | 1.18E+08 | 0.045687 | 1        |
| 6 | 1.18E+08 | 1.18E+08 | NM_02833 | chr6 | 1.18E+08 | 1.18E+08 | 0.075529 | 1        |
| 6 | 1.19E+08 | 1.19E+08 | NM_00978 | chr6 | 1.19E+08 | 1.19E+08 | 0.115059 | 1        |
| 6 | 1.22E+08 | 1.22E+08 | NM_00790 | chr6 | 1.22E+08 | 1.22E+08 | 0.076833 | 1        |
| 6 | 1.24E+08 | 1.24E+08 | NM_05309 | chr6 | 1.24E+08 | 1.24E+08 | 0.127704 | 1        |
| 6 | 1.25E+08 | 1.25E+08 | NM_01348 | chr6 | 1.25E+08 | 1.25E+08 | 0.055125 | 1        |
| 6 | 1.25E+08 | 1.25E+08 | NM_14539 | chr6 | 1.25E+08 | 1.25E+08 | 0.027219 | 1        |
| 6 | 1.25E+08 | 1.25E+08 | NM_01073 | chr6 | 1.25E+08 | 1.25E+08 | 0.019283 | 0.195238 |
| 6 | 1.25E+08 | 1.25E+08 | NM_01132 | chr6 | 1.25E+08 | 1.25E+08 | 0.097189 | 1        |
| 6 | 1.27E+08 | 1.27E+08 | NM_01020 | chr6 | 1.27E+08 | 1.27E+08 | 0.122824 | 1        |
| 6 | 1.27E+08 | 1.27E+08 | NM_01020 | chr6 | 1.27E+08 | 1.27E+08 | 0.124824 | 1        |
| 6 | 1.28E+08 | 1.28E+08 | NM_20137 | chr6 | 1.28E+08 | 1.28E+08 | 0.08441  | 1        |
| 6 | 1.29E+08 | 1.29E+08 | BC093520 | chr6 | 1.29E+08 | 1.29E+08 | 0.07649  | 1        |
| 6 | 1.29E+08 | 1.29E+08 | NM_18106 | chr6 | 1.29E+08 | 1.29E+08 | 0.099356 | 1        |



|   |          |          |               |          |          |          |          |
|---|----------|----------|---------------|----------|----------|----------|----------|
| 6 | 1.31E+08 | 1.31E+08 | NM_02556 chr6 | 1.31E+08 | 1.31E+08 | 0.104492 | 1        |
| 6 | 1.33E+08 | 1.33E+08 | NM_20702 chr6 | 1.33E+08 | 1.33E+08 | 0.096588 | 1        |
| 6 | 1.34E+08 | 1.34E+08 | NM_01059 chr6 | 1.34E+08 | 1.34E+08 | 0.072678 | 1        |
| 6 | 1.37E+08 | 1.37E+08 | U37465 chr6   | 1.37E+08 | 1.37E+08 | 0.082118 | 1        |
| 6 | 1.38E+08 | 1.38E+08 | BC057086 chr6 | 1.38E+08 | 1.38E+08 | 0.072941 | 1        |
| 6 | 1.39E+08 | 1.39E+08 | NM_20722 chr6 | 1.39E+08 | 1.39E+08 | 0.074588 | 1        |
| 6 | 1.4E+08  | 1.4E+08  | NM_00760 chr6 | 1.4E+08  | 1.4E+08  | 0.071915 | 1        |
| 6 | 1.4E+08  | 1.4E+08  | NM_05406 chr6 | 1.4E+08  | 1.4E+08  | 0.071957 | 1        |
| 6 | 1.4E+08  | 1.4E+08  | BC006653 chr6 | 1.4E+08  | 1.4E+08  | 0.073882 | 1        |
| 6 | 1.42E+08 | 1.42E+08 | NM_01049 chr6 | 1.42E+08 | 1.42E+08 | 0.074361 | 1        |
| 6 | 1.47E+08 | 1.47E+08 | NM_02531 chr6 | 1.47E+08 | 1.47E+08 | 0.107499 | 1        |
| 6 | 1.47E+08 | 1.47E+08 | NM_17230 chr6 | 1.47E+08 | 1.47E+08 | 0.086118 | 1        |
| 6 | 1.47E+08 | 1.47E+08 | NM_02562 chr6 | 1.47E+08 | 1.47E+08 | 0.090558 | 1        |
| 7 | 4353490  | 4362181  | NM_18340 chr7 | 4362114  | 4362825  | 0.007823 | 0.095506 |
| 7 | 4507016  | 4531430  | NM_17300 chr7 | 4525240  | 4525888  | 0.026582 | 1        |
| 7 | 9147598  | 9156244  | NM_13423 chr7 | 9149678  | 9150707  | 0.119116 | 1        |
| 7 | 15968411 | 15977344 | NM_13378 chr7 | 15976355 | 15977107 | 0.084285 | 1        |
| 7 | 15971147 | 15981254 | NM_17343 chr7 | 15976355 | 15977107 | 0.074495 | 1        |
| 7 | 16112317 | 16120816 | NM_00100 chr7 | 16116893 | 16117532 | 0.075294 | 1        |
| 7 | 17162411 | 17170923 | NM_02721 chr7 | 17163985 | 17164637 | 0.076706 | 1        |
| 7 | 17218449 | 17227012 | NM_02608 chr7 | 17225146 | 17225775 | 0.073564 | 1        |
| 7 | 23705871 | 23714370 | NM_20761 chr7 | 23708993 | 23709956 | 0.113412 | 1        |
| 7 | 23757534 | 23766033 | NM_20348 chr7 | 23763025 | 23763973 | 0.111647 | 1        |
| 7 | 24412019 | 24420518 | NM_19915 chr7 | 24417599 | 24418193 | 0.07     | 1        |
| 7 | 24430551 | 24440823 | NM_17759 chr7 | 24431164 | 24431852 | 0.067069 | 1        |
| 7 | 25004187 | 25012715 | NM_00877 chr7 | 25012626 | 25013369 | 0.010552 | 0.120968 |
| 7 | 27356683 | 27365183 | NM_02841 chr7 | 27364166 | 27365124 | 0.11281  | 1        |
| 7 | 27826014 | 27841075 | NM_17692 chr7 | 27833715 | 27834581 | 0.057562 | 1        |
| 7 | 28937562 | 28947253 | NM_00103 chr7 | 28939611 | 28940226 | 0.063558 | 1        |
| 7 | 29968908 | 29977407 | BC057041 chr7 | 29975854 | 29976568 | 0.084118 | 1        |
| 7 | 30454231 | 30462801 | NM_17220 chr7 | 30460933 | 30461599 | 0.077821 | 1        |
| 7 | 30479162 | 30487661 | NM_02861 chr7 | 30483443 | 30484372 | 0.109412 | 1        |
| 7 | 33445573 | 33454072 | NM_17744 chr7 | 33447055 | 33447886 | 0.097882 | 1        |
| 7 | 33445573 | 33454072 | NM_17744 chr7 | 33452667 | 33453257 | 0.069529 | 1        |
| 7 | 33724327 | 33732826 | NM_00959 chr7 | 33731485 | 33732146 | 0.077882 | 1        |
| 7 | 35151852 | 35160438 | NM_02129 chr7 | 35153540 | 35154647 | 0.129032 | 1        |
| 7 | 41051480 | 41059979 | NM_00103 chr7 | 41059032 | 41060206 | 0.111529 | 0.806809 |
| 7 | 42218734 | 42227233 | NM_02770 chr7 | 42222397 | 42222953 | 0.065529 | 1        |
| 7 | 43213325 | 43221824 | NM_14558 chr7 | 43220205 | 43221273 | 0.125765 | 1        |
| 7 | 43496781 | 43505280 | NM_02823 chr7 | 43499639 | 43500233 | 0.07     | 1        |
| 7 | 43838103 | 43846623 | NM_01011 chr7 | 43839572 | 43840880 | 0.15362  | 1        |
| 7 | 43838103 | 43846623 | NM_01011 chr7 | 43844129 | 43844739 | 0.071705 | 1        |
| 7 | 43838103 | 43846623 | NM_01011 chr7 | 43845148 | 43845835 | 0.080742 | 1        |
| 7 | 43857921 | 43866420 | NM_01064 chr7 | 43861717 | 43862379 | 0.078    | 1        |
| 7 | 43874720 | 43883245 | NM_01064 chr7 | 43878336 | 43879088 | 0.088318 | 1        |
| 7 | 43914332 | 43922835 | NM_02026 chr7 | 43918214 | 43918850 | 0.074906 | 1        |
| 7 | 43914332 | 43922835 | NM_02026 chr7 | 43921482 | 43922216 | 0.08643  | 1        |

|   |          |          |          |      |          |          |          |          |
|---|----------|----------|----------|------|----------|----------|----------|----------|
| 7 | 43964334 | 43972833 | NM_01064 | chr7 | 43965978 | 43966604 | 0.073765 | 1        |
| 7 | 43974721 | 43983224 | NM_01011 | chr7 | 43975071 | 43976009 | 0.110419 | 1        |
| 7 | 43974721 | 43983224 | NM_01011 | chr7 | 43981793 | 43982444 | 0.07667  | 1        |
| 7 | 44060272 | 44068771 | NM_00869 | chr7 | 44060792 | 44061392 | 0.070706 | 1        |
| 7 | 44069477 | 44077980 | NM_01091 | chr7 | 44069491 | 44070105 | 0.072319 | 1        |
| 7 | 44069477 | 44077980 | NM_01091 | chr7 | 44075044 | 44075643 | 0.070555 | 1        |
| 7 | 44172437 | 44180944 | NM_00913 | chr7 | 44180913 | 44181792 | 0.003761 | 0.036364 |
| 7 | 44358713 | 44367212 | BC049752 | chr7 | 44365531 | 44366159 | 0.074    | 1        |
| 7 | 44361949 | 44370450 | NM_19799 | chr7 | 44365531 | 44366159 | 0.073983 | 1        |
| 7 | 44390177 | 44406113 | NM_17806 | chr7 | 44402405 | 44403182 | 0.048817 | 1        |
| 7 | 44989923 | 45018697 | NM_01352 | chr7 | 45013022 | 45014095 | 0.037324 | 1        |
| 7 | 45580199 | 45599855 | NM_02001 | chr7 | 45597705 | 45598444 | 0.037646 | 1        |
| 7 | 45645989 | 45655921 | NM_00100 | chr7 | 45652396 | 45653488 | 0.110037 | 1        |
| 7 | 45650010 | 45658509 | NM_00103 | chr7 | 45652396 | 45653488 | 0.128588 | 1        |
| 7 | 46238516 | 46247081 | NM_01086 | chr7 | 46240791 | 46241634 | 0.098529 | 1        |
| 7 | 63317722 | 63326221 | NM_13088 | chr7 | 63324937 | 63325711 | 0.091177 | 1        |
| 7 | 65564119 | 65574913 | NM_17805 | chr7 | 65564686 | 65565388 | 0.065123 | 1        |
| 7 | 66264741 | 66273291 | NM_14619 | chr7 | 66270479 | 66271094 | 0.072038 | 1        |
| 7 | 66581054 | 66589553 | NM_15281 | chr7 | 66586278 | 66586968 | 0.081294 | 1        |
| 7 | 67512328 | 67524744 | NM_17512 | chr7 | 67516717 | 67517320 | 0.048643 | 1        |
| 7 | 67514954 | 67523453 | NM_02590 | chr7 | 67516717 | 67517320 | 0.071059 | 1        |
| 7 | 67630698 | 67639206 | NM_20163 | chr7 | 67631050 | 67631709 | 0.077565 | 1        |
| 7 | 68485969 | 68494468 | NM_00101 | chr7 | 68489582 | 68490328 | 0.087882 | 1        |
| 7 | 68485969 | 68494468 | NM_00101 | chr7 | 68493090 | 68493938 | 0.099882 | 1        |
| 7 | 74425627 | 74434293 | NM_02390 | chr7 | 74430081 | 74430794 | 0.082381 | 1        |
| 7 | 79140779 | 79149308 | NM_01881 | chr7 | 79141848 | 79142464 | 0.072333 | 1        |
| 7 | 79140779 | 79149308 | NM_01881 | chr7 | 79142751 | 79143441 | 0.081008 | 1        |
| 7 | 79713298 | 79721865 | NM_00848 | chr7 | 79718306 | 79719162 | 0.100023 | 1        |
| 7 | 82518826 | 82528206 | NM_17531 | chr7 | 82528019 | 82528574 | 0.020041 | 0.338129 |
| 7 | 82522209 | 82530713 | NM_17789 | chr7 | 82528019 | 82528574 | 0.065373 | 1        |
| 7 | 84283600 | 84292144 | NM_00748 | chr7 | 84288187 | 84289082 | 0.104857 | 1        |
| 7 | 84283600 | 84292144 | NM_00748 | chr7 | 84290349 | 84290968 | 0.072557 | 1        |
| 7 | 84553037 | 84561536 | NM_02298 | chr7 | 84558698 | 84559310 | 0.072118 | 1        |
| 7 | 87366623 | 87375273 | NM_01166 | chr7 | 87367716 | 87368325 | 0.070512 | 1        |
| 7 | 90217891 | 90226390 | NM_00104 | chr7 | 90225776 | 90226358 | 0.068588 | 1        |
| 7 | 96305989 | 96314488 | AB025413 | chr7 | 96312431 | 96313139 | 0.083412 | 1        |
| 7 | 97386814 | 97395313 | BC013813 | chr7 | 97390787 | 97391396 | 0.071765 | 1        |
| 7 | 97386814 | 97395313 | BC013813 | chr7 | 97392141 | 97392735 | 0.07     | 1        |
| 7 | 98585577 | 98594076 | BC022684 | chr7 | 98586516 | 98587104 | 0.069294 | 1        |
| 7 | 98705321 | 98716589 | NM_00951 | chr7 | 98707218 | 98707836 | 0.05493  | 1        |
| 7 | 99635247 | 99643746 | NM_14635 | chr7 | 99641372 | 99642214 | 0.099177 | 1        |
| 7 | 1.01E+08 | 1.01E+08 | NM_17707 | chr7 | 1.01E+08 | 1.01E+08 | 0.070052 | 1        |
| 7 | 1.01E+08 | 1.01E+08 | NM_00749 | chr7 | 1.01E+08 | 1.01E+08 | 0.069294 | 1        |
| 7 | 1.03E+08 | 1.03E+08 | NM_14705 | chr7 | 1.03E+08 | 1.03E+08 | 0.078471 | 1        |
| 7 | 1.04E+08 | 1.04E+08 | NM_14705 | chr7 | 1.04E+08 | 1.04E+08 | 0.134824 | 1        |
| 7 | 1.04E+08 | 1.04E+08 | NM_14681 | chr7 | 1.04E+08 | 1.04E+08 | 0.121176 | 1        |
| 7 | 1.05E+08 | 1.05E+08 | NM_14704 | chr7 | 1.05E+08 | 1.05E+08 | 0.072471 | 1        |

|   |          |          |               |          |          |          |   |
|---|----------|----------|---------------|----------|----------|----------|---|
| 7 | 1.05E+08 | 1.05E+08 | NM_14635 chr7 | 1.05E+08 | 1.05E+08 | 0.071294 | 1 |
| 7 | 1.07E+08 | 1.07E+08 | NM_14635 chr7 | 1.07E+08 | 1.07E+08 | 0.03096  | 1 |
| 7 | 1.07E+08 | 1.07E+08 | NM_00100 chr7 | 1.07E+08 | 1.07E+08 | 0.101882 | 1 |
| 7 | 1.08E+08 | 1.08E+08 | NM_14673 chr7 | 1.08E+08 | 1.08E+08 | 0.054118 | 1 |
| 7 | 1.08E+08 | 1.08E+08 | NM_14674 chr7 | 1.08E+08 | 1.08E+08 | 0.035612 | 1 |
| 7 | 1.09E+08 | 1.09E+08 | NM_14672 chr7 | 1.09E+08 | 1.09E+08 | 0.094    | 1 |
| 7 | 1.09E+08 | 1.09E+08 | NM_14630 chr7 | 1.09E+08 | 1.09E+08 | 0.093529 | 1 |
| 7 | 1.09E+08 | 1.09E+08 | NM_02061 chr7 | 1.09E+08 | 1.09E+08 | 0.074118 | 1 |
| 7 | 1.12E+08 | 1.12E+08 | NM_17373 chr7 | 1.12E+08 | 1.12E+08 | 0.076824 | 1 |
| 7 | 1.13E+08 | 1.13E+08 | NM_17724 chr7 | 1.13E+08 | 1.13E+08 | 0.116235 | 1 |
| 7 | 1.14E+08 | 1.14E+08 | NM_01105 chr7 | 1.14E+08 | 1.14E+08 | 0.070717 | 1 |
| 7 | 1.16E+08 | 1.16E+08 | NM_01677 chr7 | 1.16E+08 | 1.16E+08 | 0.069058 | 1 |
| 7 | 1.18E+08 | 1.18E+08 | NM_01941 chr7 | 1.18E+08 | 1.18E+08 | 0.075324 | 1 |
| 7 | 1.19E+08 | 1.19E+08 | BC052772 chr7 | 1.19E+08 | 1.19E+08 | 0.073177 | 1 |
| 7 | 1.19E+08 | 1.19E+08 | NM_02242 chr7 | 1.19E+08 | 1.19E+08 | 0.050059 | 1 |
| 7 | 1.19E+08 | 1.19E+08 | NM_00102 chr7 | 1.19E+08 | 1.19E+08 | 0.080588 | 1 |
| 7 | 1.19E+08 | 1.19E+08 | BC095985 chr7 | 1.19E+08 | 1.19E+08 | 0.068797 | 1 |
| 7 | 1.21E+08 | 1.21E+08 | BC023188 chr7 | 1.21E+08 | 1.21E+08 | 0.069059 | 1 |
| 7 | 1.22E+08 | 1.22E+08 | BC048553 chr7 | 1.22E+08 | 1.22E+08 | 0.087882 | 1 |
| 7 | 1.23E+08 | 1.23E+08 | BC058379 chr7 | 1.23E+08 | 1.23E+08 | 0.155647 | 1 |
| 7 | 1.23E+08 | 1.23E+08 | NM_00747 chr7 | 1.23E+08 | 1.23E+08 | 0.075935 | 1 |
| 7 | 1.26E+08 | 1.26E+08 | NM_02371 chr7 | 1.26E+08 | 1.26E+08 | 0.035834 | 1 |
| 7 | 1.26E+08 | 1.26E+08 | NM_00984 chr7 | 1.26E+08 | 1.26E+08 | 0.124588 | 1 |
| 7 | 1.26E+08 | 1.26E+08 | NM_14563 chr7 | 1.26E+08 | 1.26E+08 | 0.097529 | 1 |
| 7 | 1.28E+08 | 1.28E+08 | BC067200 chr7 | 1.28E+08 | 1.28E+08 | 0.070588 | 1 |
| 7 | 1.3E+08  | 1.3E+08  | NM_01020 chr7 | 1.3E+08  | 1.3E+08  | 0.053928 | 1 |
| 7 | 1.31E+08 | 1.31E+08 | AB036742 chr7 | 1.31E+08 | 1.31E+08 | 0.097765 | 1 |
| 7 | 1.32E+08 | 1.32E+08 | NM_02993 chr7 | 1.32E+08 | 1.32E+08 | 0.062507 | 1 |
| 7 | 1.33E+08 | 1.33E+08 | BC017520 chr7 | 1.33E+08 | 1.33E+08 | 0.091765 | 1 |
| 7 | 1.34E+08 | 1.34E+08 | NM_13394 chr7 | 1.34E+08 | 1.34E+08 | 0.225681 | 1 |
| 7 | 1.35E+08 | 1.35E+08 | NM_18319 chr7 | 1.35E+08 | 1.35E+08 | 0.069868 | 1 |
| 7 | 1.35E+08 | 1.35E+08 | U36758 chr7   | 1.35E+08 | 1.35E+08 | 0.068706 | 1 |
| 7 | 1.37E+08 | 1.37E+08 | M84524 chr7   | 1.37E+08 | 1.37E+08 | 0.082941 | 1 |
| 7 | 1.39E+08 | 1.39E+08 | NM_00976 chr7 | 1.39E+08 | 1.39E+08 | 0.072274 | 1 |
| 7 | 1.39E+08 | 1.39E+08 | BC119557 chr7 | 1.39E+08 | 1.39E+08 | 0.069152 | 1 |
| 7 | 1.39E+08 | 1.39E+08 | NM_01199 chr7 | 1.39E+08 | 1.39E+08 | 0.095483 | 1 |
| 7 | 1.39E+08 | 1.39E+08 | NM_01199 chr7 | 1.39E+08 | 1.39E+08 | 0.107068 | 1 |
| 7 | 1.4E+08  | 1.4E+08  | BC056493 chr7 | 1.4E+08  | 1.4E+08  | 0.052058 | 1 |
| 7 | 1.4E+08  | 1.4E+08  | NM_01083 chr7 | 1.4E+08  | 1.4E+08  | 0.115882 | 1 |
| 7 | 1.4E+08  | 1.4E+08  | NM_19930 chr7 | 1.4E+08  | 1.4E+08  | 0.074118 | 1 |
| 7 | 1.4E+08  | 1.4E+08  | NM_00101 chr7 | 1.4E+08  | 1.4E+08  | 0.069177 | 1 |
| 7 | 1.4E+08  | 1.4E+08  | NM_17553 chr7 | 1.4E+08  | 1.4E+08  | 0.085765 | 1 |
| 7 | 1.41E+08 | 1.41E+08 | NM_14696 chr7 | 1.41E+08 | 1.41E+08 | 0.071529 | 1 |
| 7 | 1.41E+08 | 1.41E+08 | NM_14538 chr7 | 1.41E+08 | 1.41E+08 | 0.051848 | 1 |
| 7 | 1.41E+08 | 1.41E+08 | NM_17789 chr7 | 1.41E+08 | 1.41E+08 | 0.069765 | 1 |
| 7 | 1.41E+08 | 1.41E+08 | NM_01976 chr7 | 1.41E+08 | 1.41E+08 | 0.056102 | 1 |
| 7 | 1.41E+08 | 1.41E+08 | NM_02779 chr7 | 1.41E+08 | 1.41E+08 | 0.096073 | 1 |

|   |          |          |               |          |          |          |   |
|---|----------|----------|---------------|----------|----------|----------|---|
| 7 | 1.41E+08 | 1.41E+08 | NM_01687 chr7 | 1.41E+08 | 1.41E+08 | 0.096706 | 1 |
| 7 | 1.42E+08 | 1.42E+08 | NM_18172 chr7 | 1.42E+08 | 1.42E+08 | 0.092107 | 1 |
| 7 | 1.42E+08 | 1.42E+08 | NM_00103 chr7 | 1.42E+08 | 1.42E+08 | 0.108235 | 1 |
| 7 | 1.42E+08 | 1.42E+08 | NM_00103 chr7 | 1.42E+08 | 1.42E+08 | 0.092    | 1 |
| 7 | 1.42E+08 | 1.42E+08 | NM_01580 chr7 | 1.42E+08 | 1.42E+08 | 0.072353 | 1 |
| 7 | 1.42E+08 | 1.42E+08 | NM_01580 chr7 | 1.42E+08 | 1.42E+08 | 0.072353 | 1 |
| 7 | 1.42E+08 | 1.42E+08 | NM_01580 chr7 | 1.42E+08 | 1.42E+08 | 0.087177 | 1 |
| 7 | 1.42E+08 | 1.42E+08 | NM_01580 chr7 | 1.42E+08 | 1.42E+08 | 0.087177 | 1 |
| 7 | 1.42E+08 | 1.42E+08 | NM_00838 chr7 | 1.42E+08 | 1.42E+08 | 0.108143 | 1 |
| 7 | 1.43E+08 | 1.43E+08 | NM_00937 chr7 | 1.43E+08 | 1.43E+08 | 0.078118 | 1 |
| 7 | 1.43E+08 | 1.43E+08 | NM_02028 chr7 | 1.43E+08 | 1.43E+08 | 0.097765 | 1 |
| 7 | 1.43E+08 | 1.43E+08 | NM_00104 chr7 | 1.43E+08 | 1.43E+08 | 0.047069 | 1 |
| 7 | 1.43E+08 | 1.44E+08 | NM_02429 chr7 | 1.43E+08 | 1.43E+08 | 0.081177 | 1 |
| 7 | 1.43E+08 | 1.44E+08 | NM_02429 chr7 | 1.43E+08 | 1.43E+08 | 0.111529 | 1 |
| 7 | 1.44E+08 | 1.44E+08 | BC006062 chr7 | 1.44E+08 | 1.44E+08 | 0.074588 | 1 |
| 8 | 3659756  | 3668261  | NM_02698 chr8 | 3665614  | 3666223  | 0.071714 | 1 |
| 8 | 9971836  | 9980375  | BC043690 chr8 | 9974953  | 9975741  | 0.092389 | 1 |
| 8 | 9973796  | 9983658  | NM_17695 chr8 | 9974953  | 9975741  | 0.079996 | 1 |
| 8 | 9971836  | 9980375  | BC043690 chr8 | 9977561  | 9978419  | 0.100585 | 1 |
| 8 | 9973796  | 9983658  | NM_17695 chr8 | 9977561  | 9978419  | 0.087093 | 1 |
| 8 | 11306996 | 11315495 | NM_00993 chr8 | 11308439 | 11309426 | 0.116235 | 1 |
| 8 | 12909888 | 12918434 | NM_17807 chr8 | 12910108 | 12911203 | 0.128232 | 1 |
| 8 | 13015918 | 13028522 | NM_01017 chr8 | 13016727 | 13017979 | 0.099405 | 1 |
| 8 | 13031285 | 13039843 | NM_00797 chr8 | 13036207 | 13037192 | 0.1152   | 1 |
| 8 | 13251630 | 13260139 | NM_17275 chr8 | 13258801 | 13259686 | 0.104113 | 1 |
| 8 | 18840282 | 18849030 | NM_02679 chr8 | 18840994 | 18841608 | 0.070294 | 1 |
| 8 | 22573194 | 22588618 | AY746430 chr8 | 22574591 | 22575313 | 0.046872 | 1 |
| 8 | 22573194 | 22588618 | AY746430 chr8 | 22580365 | 22581100 | 0.047715 | 1 |
| 8 | 23166691 | 23175192 | NM_00100 chr8 | 23171023 | 23171619 | 0.070219 | 1 |
| 8 | 23397897 | 23414835 | NM_13922 chr8 | 23406183 | 23406813 | 0.037251 | 1 |
| 8 | 23994570 | 24003069 | AF196476 chr8 | 24001904 | 24002757 | 0.100471 | 1 |
| 8 | 24517820 | 24526319 | NM_03115 chr8 | 24521131 | 24521785 | 0.077059 | 1 |
| 8 | 26039379 | 26047878 | NM_14594 chr8 | 26044419 | 26045056 | 0.075059 | 1 |
| 8 | 26476798 | 26485328 | NM_02719 chr8 | 26483562 | 26484170 | 0.071387 | 1 |
| 8 | 26479834 | 26488450 | NM_00740 chr8 | 26483562 | 26484170 | 0.070674 | 1 |
| 8 | 32549597 | 32560084 | NM_02586 chr8 | 32559343 | 32560061 | 0.068555 | 1 |
| 8 | 33472545 | 33481044 | AY648975 chr8 | 33477558 | 33478106 | 0.064588 | 1 |
| 8 | 35113173 | 35121672 | NM_01034 chr8 | 35115236 | 35115647 | 0.048471 | 1 |
| 8 | 42711442 | 42719970 | NM_14559 chr8 | 42718958 | 42719696 | 0.086646 | 1 |
| 8 | 44637804 | 44648973 | NM_17774 chr8 | 44640592 | 44641273 | 0.061056 | 1 |
| 8 | 45195811 | 45204310 | NM_14574 chr8 | 45198497 | 45199173 | 0.079647 | 1 |
| 8 | 46878489 | 46887001 | NM_15353 chr8 | 46881729 | 46882367 | 0.075062 | 1 |
| 8 | 47378278 | 47386835 | NM_01679 chr8 | 47379908 | 47380531 | 0.072914 | 1 |
| 8 | 47378278 | 47386835 | NM_01679 chr8 | 47382233 | 47383402 | 0.136714 | 1 |
| 8 | 47378278 | 47386835 | NM_01679 chr8 | 47386254 | 47386783 | 0.06193  | 1 |
| 8 | 49210217 | 49218716 | NM_17240 chr8 | 49216126 | 49216758 | 0.074471 | 1 |
| 8 | 55004424 | 55012923 | NM_00100 chr8 | 55004450 | 55005098 | 0.076353 | 1 |

|   |          |          |          |      |          |          |          |   |
|---|----------|----------|----------|------|----------|----------|----------|---|
| 8 | 56214877 | 56229065 | NM_02822 | chr8 | 56219163 | 56219794 | 0.044542 | 1 |
| 8 | 65837638 | 65846165 | NM_02368 | chr8 | 65840626 | 65841300 | 0.079151 | 1 |
| 8 | 65837638 | 65846165 | NM_02368 | chr8 | 65842105 | 65842719 | 0.072115 | 1 |
| 8 | 68541514 | 68550013 | NM_17518 | chr8 | 68545723 | 68546853 | 0.133059 | 1 |
| 8 | 70413747 | 70432512 | NM_01087 | chr8 | 70424141 | 70424747 | 0.032346 | 1 |
| 8 | 72067443 | 72075942 | NM_19936 | chr8 | 72067950 | 72068509 | 0.065882 | 1 |
| 8 | 72067443 | 72075942 | NM_19936 | chr8 | 72072683 | 72073472 | 0.092941 | 1 |
| 8 | 72841088 | 72851346 | BC031407 | chr8 | 72843533 | 72844429 | 0.087435 | 1 |
| 8 | 73402388 | 73411934 | NM_17877 | chr8 | 73408358 | 73409002 | 0.067561 | 1 |
| 8 | 74620391 | 74639957 | NM_02818 | chr8 | 74627381 | 74628202 | 0.04201  | 1 |
| 8 | 75032557 | 75041056 | NM_14633 | chr8 | 75038718 | 75039412 | 0.081765 | 1 |
| 8 | 75058275 | 75066809 | NM_00100 | chr8 | 75060107 | 75060671 | 0.066198 | 1 |
| 8 | 81330225 | 81338724 | NM_13894 | chr8 | 81335896 | 81336638 | 0.087412 | 1 |
| 8 | 81380025 | 81388545 | BC002088 | chr8 | 81383562 | 81384509 | 0.111255 | 1 |
| 8 | 86425198 | 86433697 | NM_14627 | chr8 | 86429189 | 86430179 | 0.116588 | 1 |
| 8 | 87781308 | 87790026 | NM_00809 | chr8 | 87782570 | 87783241 | 0.077073 | 1 |
| 8 | 87944233 | 87975939 | NM_01076 | chr8 | 87957175 | 87957774 | 0.018923 | 1 |
| 8 | 89508212 | 89516711 | NM_02582 | chr8 | 89510480 | 89511266 | 0.092588 | 1 |
| 8 | 89633540 | 89642111 | NM_00917 | chr8 | 89637826 | 89638623 | 0.093094 | 1 |
| 8 | 90746919 | 90755418 | AF188609 | chr8 | 90750293 | 90751307 | 0.119412 | 1 |
| 8 | 90783341 | 90791840 | AY147407 | chr8 | 90789030 | 90789687 | 0.077412 | 1 |
| 8 | 96084380 | 96092932 | NM_05320 | chr8 | 96089318 | 96090022 | 0.082427 | 1 |
| 8 | 96693967 | 96702943 | NM_01030 | chr8 | 96699881 | 96700738 | 0.095578 | 1 |
| 8 | 96920367 | 96928919 | NM_17776 | chr8 | 96921188 | 96921818 | 0.073775 | 1 |
| 8 | 96920367 | 96928919 | NM_17776 | chr8 | 96923847 | 96924574 | 0.085116 | 1 |
| 8 | 96923628 | 96932168 | NM_02662 | chr8 | 96923847 | 96924574 | 0.085236 | 1 |
| 8 | 97628719 | 97637332 | NM_00913 | chr8 | 97635280 | 97635896 | 0.071628 | 1 |
| 8 | 98210461 | 98227079 | NM_02446 | chr8 | 98221048 | 98221631 | 0.035141 | 1 |
| 8 | 98215469 | 98223968 | NM_13395 | chr8 | 98221048 | 98221631 | 0.068706 | 1 |
| 8 | 1.08E+08 | 1.08E+08 | NM_13396 | chr8 | 1.08E+08 | 1.08E+08 | 0.082776 | 1 |
| 8 | 1.08E+08 | 1.08E+08 | NM_17275 | chr8 | 1.08E+08 | 1.08E+08 | 0.069358 | 1 |
| 8 | 1.08E+08 | 1.08E+08 | BC057188 | chr8 | 1.08E+08 | 1.08E+08 | 0.055398 | 1 |
| 8 | 1.08E+08 | 1.08E+08 | NM_14621 | chr8 | 1.08E+08 | 1.08E+08 | 0.060706 | 1 |
| 8 | 1.08E+08 | 1.08E+08 | NM_00103 | chr8 | 1.08E+08 | 1.08E+08 | 0.072235 | 1 |
| 8 | 1.09E+08 | 1.09E+08 | BC046980 | chr8 | 1.09E+08 | 1.09E+08 | 0.098471 | 1 |
| 8 | 1.1E+08  | 1.1E+08  | NM_00821 | chr8 | 1.1E+08  | 1.1E+08  | 0.099765 | 1 |
| 8 | 1.12E+08 | 1.13E+08 | NM_02004 | chr8 | 1.13E+08 | 1.13E+08 | 0.068032 | 1 |
| 8 | 1.12E+08 | 1.13E+08 | NM_00103 | chr8 | 1.13E+08 | 1.13E+08 | 0.070353 | 1 |
| 8 | 1.13E+08 | 1.13E+08 | NM_01199 | chr8 | 1.13E+08 | 1.13E+08 | 0.097457 | 1 |
| 8 | 1.13E+08 | 1.13E+08 | NM_14621 | chr8 | 1.13E+08 | 1.13E+08 | 0.070353 | 1 |
| 8 | 1.14E+08 | 1.14E+08 | NM_00791 | chr8 | 1.14E+08 | 1.14E+08 | 0.071405 | 1 |
| 8 | 1.22E+08 | 1.22E+08 | BC054837 | chr8 | 1.22E+08 | 1.22E+08 | 0.074471 | 1 |
| 8 | 1.23E+08 | 1.23E+08 | NM_03020 | chr8 | 1.23E+08 | 1.23E+08 | 0.087529 | 1 |
| 8 | 1.26E+08 | 1.26E+08 | NM_02327 | chr8 | 1.26E+08 | 1.26E+08 | 0.074173 | 1 |
| 8 | 1.27E+08 | 1.27E+08 | NM_00900 | chr8 | 1.27E+08 | 1.27E+08 | 0.125176 | 1 |
| 8 | 1.28E+08 | 1.28E+08 | BC017545 | chr8 | 1.28E+08 | 1.28E+08 | 0.083765 | 1 |
| 8 | 1.28E+08 | 1.28E+08 | NM_02685 | chr8 | 1.28E+08 | 1.28E+08 | 0.116901 | 1 |

|   |          |          |          |      |          |          |          |          |
|---|----------|----------|----------|------|----------|----------|----------|----------|
| 8 | 1.28E+08 | 1.28E+08 | BC094596 | chr8 | 1.28E+08 | 1.28E+08 | 0.068588 | 1        |
| 8 | 1.29E+08 | 1.29E+08 | NM_02563 | chr8 | 1.29E+08 | 1.29E+08 | 0.041968 | 1        |
| 8 | 1.29E+08 | 1.29E+08 | NM_00843 | chr8 | 1.29E+08 | 1.29E+08 | 0.07377  | 1        |
| 8 | 1.3E+08  | 1.3E+08  | NM_03362 | chr8 | 1.3E+08  | 1.3E+08  | 0.099294 | 1        |
| 8 | 1.32E+08 | 1.32E+08 | NM_02929 | chr8 | 1.32E+08 | 1.32E+08 | 0.074235 | 1        |
| 8 | 1.32E+08 | 1.32E+08 | NM_02906 | chr8 | 1.32E+08 | 1.32E+08 | 0.073853 | 1        |
| 9 | 5302860  | 5311373  | NM_00760 | chr9 | 5307838  | 5308887  | 0.123326 | 1        |
| 9 | 7552448  | 7560962  | NM_00861 | chr9 | 7553600  | 7554452  | 0.100176 | 1        |
| 9 | 7565458  | 7573957  | NM_00103 | chr9 | 7569291  | 7569931  | 0.075412 | 1        |
| 9 | 7686101  | 7694621  | NM_01081 | chr9 | 7689223  | 7690289  | 0.12522  | 1        |
| 9 | 7832972  | 7843585  | NM_00746 | chr9 | 7840316  | 7841206  | 0.083946 | 1        |
| 9 | 14792970 | 14801871 | NM_01948 | chr9 | 14796795 | 14797394 | 0.067401 | 1        |
| 9 | 20897809 | 20906348 | NM_01674 | chr9 | 20903194 | 20903946 | 0.088173 | 1        |
| 9 | 20941443 | 20949942 | NM_01979 | chr9 | 20947699 | 20948370 | 0.079059 | 1        |
| 9 | 22390365 | 22398864 | BC054441 | chr9 | 22392610 | 22393372 | 0.089765 | 1        |
| 9 | 22390365 | 22398864 | BC054441 | chr9 | 22394133 | 22394685 | 0.065059 | 1        |
| 9 | 31660139 | 31668827 | NM_01380 | chr9 | 31660134 | 31661007 | 0.100012 | 0.994279 |
| 9 | 31660139 | 31668827 | NM_01380 | chr9 | 31667704 | 31668322 | 0.07124  | 1        |
| 9 | 34676681 | 34685180 | NM_00100 | chr9 | 34679258 | 34679887 | 0.074118 | 1        |
| 9 | 35195747 | 35204247 | NM_02133 | chr9 | 35202869 | 35203473 | 0.071168 | 1        |
| 9 | 36576480 | 36584986 | NM_18317 | chr9 | 36577727 | 36578341 | 0.072293 | 1        |
| 9 | 36830436 | 36838950 | BC050865 | chr9 | 36832169 | 36832800 | 0.074222 | 1        |
| 9 | 37145703 | 37158167 | NM_02878 | chr9 | 37148391 | 37149345 | 0.076615 | 1        |
| 9 | 37145703 | 37158167 | NM_02878 | chr9 | 37149580 | 37150434 | 0.068592 | 1        |
| 9 | 37260950 | 37269449 | BC024479 | chr9 | 37266450 | 37267325 | 0.103059 | 1        |
| 9 | 37459449 | 37467948 | NM_03055 | chr9 | 37459740 | 37460770 | 0.121294 | 1        |
| 9 | 37598491 | 37606990 | NM_14641 | chr9 | 37603560 | 37604225 | 0.078353 | 1        |
| 9 | 38406462 | 38430052 | NM_14637 | chr9 | 38407906 | 38408739 | 0.035353 | 1        |
| 9 | 38406462 | 38430052 | NM_14637 | chr9 | 38423110 | 38423873 | 0.032385 | 1        |
| 9 | 38592687 | 38608134 | NM_14678 | chr9 | 38597399 | 38598068 | 0.043371 | 1        |
| 9 | 38731114 | 38739613 | NM_14644 | chr9 | 38735910 | 38736718 | 0.095177 | 1        |
| 9 | 38743505 | 38752004 | NM_14674 | chr9 | 38743599 | 38744649 | 0.123647 | 1        |
| 9 | 38928751 | 38937250 | NM_14632 | chr9 | 38929939 | 38930665 | 0.085529 | 1        |
| 9 | 39686833 | 39695332 | NM_14710 | chr9 | 39689330 | 39690125 | 0.093647 | 1        |
| 9 | 39876031 | 39884530 | NM_14685 | chr9 | 39879601 | 39880454 | 0.100471 | 1        |
| 9 | 39931650 | 39945458 | NM_03071 | chr9 | 39933578 | 39934324 | 0.054095 | 1        |
| 9 | 40013788 | 40023048 | NM_17822 | chr9 | 40021621 | 40022280 | 0.071267 | 1        |
| 9 | 42692867 | 42701366 | NM_17548 | chr9 | 42697207 | 42697814 | 0.071529 | 1        |
| 9 | 42692867 | 42701366 | NM_17548 | chr9 | 42699931 | 42700381 | 0.053059 | 1        |
| 9 | 43055843 | 43065025 | NM_02365 | chr9 | 43063333 | 43063998 | 0.072525 | 1        |
| 9 | 44152709 | 44161208 | NM_02426 | chr9 | 44160439 | 44161179 | 0.087177 | 1        |
| 9 | 44156003 | 44164543 | NM_02178 | chr9 | 44160439 | 44161179 | 0.086758 | 1        |
| 9 | 44824178 | 44837440 | NM_00100 | chr9 | 44828758 | 44829377 | 0.046747 | 1        |
| 9 | 44824178 | 44837440 | NM_00100 | chr9 | 44830299 | 44830915 | 0.04652  | 1        |
| 9 | 45115180 | 45123933 | NM_02200 | chr9 | 45117724 | 45118859 | 0.129769 | 1        |
| 9 | 45115180 | 45123933 | NM_02200 | chr9 | 45122157 | 45123013 | 0.097898 | 1        |
| 9 | 48660409 | 48668968 | NM_01356 | chr9 | 48668419 | 48668798 | 0.044393 | 1        |

|   |          |          |          |      |          |          |          |          |
|---|----------|----------|----------|------|----------|----------|----------|----------|
| 9 | 48848660 | 48863432 | NM_03070 | chr9 | 48857285 | 48857889 | 0.040953 | 1        |
| 9 | 48848660 | 48863432 | NM_03070 | chr9 | 48860887 | 48861760 | 0.059162 | 1        |
| 9 | 48848660 | 48863432 | NM_03070 | chr9 | 48862731 | 48863389 | 0.044608 | 1        |
| 9 | 49086857 | 49095391 | NM_01007 | chr9 | 49091169 | 49091850 | 0.079906 | 1        |
| 9 | 50363566 | 50372112 | NM_02830 | chr9 | 50364313 | 50365042 | 0.08541  | 1        |
| 9 | 50862231 | 50870746 | NM_01949 | chr9 | 50868586 | 50869254 | 0.078558 | 1        |
| 9 | 52436698 | 52447832 | NM_17790 | chr9 | 52442771 | 52443562 | 0.071127 | 1        |
| 9 | 53161681 | 53170192 | NM_02924 | chr9 | 53167775 | 53168388 | 0.072134 | 1        |
| 9 | 56480836 | 56489390 | NM_18107 | chr9 | 56483866 | 56484476 | 0.07142  | 1        |
| 9 | 57401855 | 57410388 | NM_14622 | chr9 | 57407095 | 57407716 | 0.072885 | 1        |
| 9 | 57921225 | 57929985 | NM_00929 | chr9 | 57928694 | 57929781 | 0.124187 | 1        |
| 9 | 58280740 | 58290244 | NM_17692 | chr9 | 58281471 | 58281976 | 0.053235 | 1        |
| 9 | 58336399 | 58345078 | NM_13398 | chr9 | 58339058 | 58339695 | 0.073502 | 1        |
| 9 | 59745448 | 59754085 | NM_01370 | chr9 | 59751153 | 59751669 | 0.059852 | 1        |
| 9 | 59936642 | 59945141 | NM_17244 | chr9 | 59938230 | 59938913 | 0.080471 | 1        |
| 9 | 61822266 | 61830796 | NM_02874 | chr9 | 61827305 | 61827902 | 0.070097 | 1        |
| 9 | 65146638 | 65155137 | BC022772 | chr9 | 65146632 | 65147270 | 0.074471 | 0.99061  |
| 9 | 66310083 | 66318595 | NM_17520 | chr9 | 66310718 | 66311307 | 0.069306 | 1        |
| 9 | 70959321 | 70967849 | NM_02202 | chr9 | 70965639 | 70966255 | 0.072341 | 1        |
| 9 | 71907680 | 71916363 | NM_01154 | chr9 | 71914598 | 71915182 | 0.067365 | 1        |
| 9 | 72855375 | 72863874 | AF304376 | chr9 | 72856508 | 72857186 | 0.079882 | 1        |
| 9 | 73726129 | 73736699 | BC030416 | chr9 | 73728905 | 73730091 | 0.112288 | 1        |
| 9 | 75127676 | 75136194 | NM_01347 | chr9 | 75130364 | 75131512 | 0.134875 | 1        |
| 9 | 75342976 | 75351566 | NM_01696 | chr9 | 75351067 | 75351522 | 0.053079 | 1        |
| 9 | 75381061 | 75391042 | NM_00103 | chr9 | 75386054 | 75386651 | 0.059908 | 1        |
| 9 | 76829133 | 76837658 | NM_01203 | chr9 | 76834674 | 76835698 | 0.120221 | 1        |
| 9 | 77131272 | 77139771 | BC089626 | chr9 | 77137916 | 77138513 | 0.070353 | 1        |
| 9 | 78107714 | 78116237 | NM_20582 | chr9 | 78115316 | 78116171 | 0.100422 | 1        |
| 9 | 78161724 | 78170272 | NM_02648 | chr9 | 78165163 | 78165973 | 0.094865 | 1        |
| 9 | 80259754 | 80268323 | NM_02201 | chr9 | 80262764 | 80263545 | 0.091249 | 1        |
| 9 | 82940744 | 82949323 | NM_17507 | chr9 | 82940747 | 82941532 | 0.091608 | 1        |
| 9 | 83600319 | 83608955 | NM_14894 | chr9 | 83605762 | 83606524 | 0.088341 | 1        |
| 9 | 86807483 | 86822509 | NM_02419 | chr9 | 86808862 | 86809978 | 0.074333 | 1        |
| 9 | 89533869 | 89542368 | NM_20726 | chr9 | 89535127 | 89535967 | 0.098941 | 1        |
| 9 | 89533869 | 89542368 | NM_20726 | chr9 | 89536310 | 89537291 | 0.115529 | 1        |
| 9 | 92048019 | 92056553 | AF159593 | chr9 | 92052413 | 92053206 | 0.093029 | 1        |
| 9 | 92340173 | 92348672 | NM_01196 | chr9 | 92342956 | 92343658 | 0.082706 | 1        |
| 9 | 97840020 | 97848519 | NM_02231 | chr9 | 97840540 | 97841157 | 0.072706 | 1        |
| 9 | 97840020 | 97848519 | NM_02231 | chr9 | 97846515 | 97847252 | 0.086824 | 1        |
| 9 | 98842543 | 98851042 | BC115956 | chr9 | 98845166 | 98846281 | 0.131294 | 1        |
| 9 | 99046794 | 99058116 | NM_02387 | chr9 | 99046271 | 99047312 | 0.045836 | 0.498081 |
| 9 | 99232749 | 99241248 | BC024389 | chr9 | 99240014 | 99240608 | 0.07     | 1        |
| 9 | 99416796 | 99425295 | NM_00107 | chr9 | 99423311 | 99424285 | 0.114706 | 1        |
| 9 | 1E+08    | 1E+08    | NM_00103 | chr9 | 1E+08    | 1E+08    | 0.066235 | 0.938333 |
| 9 | 1.04E+08 | 1.04E+08 | NM_02871 | chr9 | 1.04E+08 | 1.04E+08 | 0.080932 | 1        |
| 9 | 1.08E+08 | 1.08E+08 | NM_02380 | chr9 | 1.08E+08 | 1.08E+08 | 0.068918 | 1        |
| 9 | 1.08E+08 | 1.08E+08 | NM_00814 | chr9 | 1.08E+08 | 1.08E+08 | 0.104658 | 1        |

|    |          |          |                |          |          |          |   |
|----|----------|----------|----------------|----------|----------|----------|---|
| 9  | 1.08E+08 | 1.08E+08 | NM_01134 chr9  | 1.08E+08 | 1.08E+08 | 0.050376 | 1 |
| 9  | 1.09E+08 | 1.09E+08 | NM_13442 chr9  | 1.09E+08 | 1.09E+08 | 0.106728 | 1 |
| 9  | 1.09E+08 | 1.09E+08 | NM_00100 chr9  | 1.09E+08 | 1.09E+08 | 0.068471 | 1 |
| 9  | 1.11E+08 | 1.11E+08 | NM_19947 chr9  | 1.11E+08 | 1.11E+08 | 0.03909  | 1 |
| 9  | 1.11E+08 | 1.11E+08 | NM_14622 chr9  | 1.11E+08 | 1.11E+08 | 0.027868 | 1 |
| 9  | 1.11E+08 | 1.11E+08 | NM_01156 chr9  | 1.11E+08 | 1.11E+08 | 0.070717 | 1 |
| 9  | 1.11E+08 | 1.11E+08 | BC086653 chr9  | 1.11E+08 | 1.11E+08 | 0.093412 | 1 |
| 9  | 1.14E+08 | 1.14E+08 | NM_01369 chr9  | 1.14E+08 | 1.14E+08 | 0.073361 | 1 |
| 9  | 1.14E+08 | 1.14E+08 | NM_17862 chr9  | 1.14E+08 | 1.14E+08 | 0.054451 | 1 |
| 9  | 1.14E+08 | 1.14E+08 | BC047204 chr9  | 1.14E+08 | 1.14E+08 | 0.071177 | 1 |
| 9  | 1.14E+08 | 1.14E+08 | BC047204 chr9  | 1.14E+08 | 1.14E+08 | 0.114588 | 1 |
| 9  | 1.19E+08 | 1.19E+08 | NM_17542 chr9  | 1.19E+08 | 1.19E+08 | 0.084136 | 1 |
| 9  | 1.2E+08  | 1.2E+08  | NM_00861 chr9  | 1.2E+08  | 1.2E+08  | 0.051823 | 1 |
| 9  | 1.2E+08  | 1.2E+08  | NM_00861 chr9  | 1.2E+08  | 1.2E+08  | 0.062365 | 1 |
| 9  | 1.21E+08 | 1.21E+08 | BC006739 chr9  | 1.21E+08 | 1.21E+08 | 0.073412 | 1 |
| 9  | 1.21E+08 | 1.21E+08 | BC058971 chr9  | 1.21E+08 | 1.21E+08 | 0.074871 | 1 |
| 9  | 1.22E+08 | 1.22E+08 | NM_02909 chr9  | 1.22E+08 | 1.22E+08 | 0.09635  | 1 |
| 9  | 1.22E+08 | 1.22E+08 | NM_02160 chr9  | 1.22E+08 | 1.22E+08 | 0.047008 | 1 |
| 9  | 1.24E+08 | 1.24E+08 | NM_00991 chr9  | 1.24E+08 | 1.24E+08 | 0.069647 | 1 |
| 9  | 1.24E+08 | 1.24E+08 | NM_13914 chr9  | 1.24E+08 | 1.24E+08 | 0.069541 | 1 |
| 10 | 4418141  | 4426712  | NM_01995 chr10 | 4418931  | 4420114  | 0.138124 | 1 |
| 10 | 4535076  | 4543651  | NM_02599 chr10 | 4536046  | 4536589  | 0.063433 | 1 |
| 10 | 5633866  | 5642365  | M38651 chr10   | 5640110  | 5640720  | 0.071882 | 1 |
| 10 | 5996240  | 6005700  | AB070852 chr10 | 5998116  | 5998771  | 0.069337 | 1 |
| 10 | 11027594 | 11036134 | NM_01014 chr10 | 11029968 | 11030617 | 0.076104 | 1 |
| 10 | 17739420 | 17747919 | NM_00904 chr10 | 17746132 | 17746756 | 0.073529 | 1 |
| 10 | 20636080 | 20651599 | NM_02620 chr10 | 20649001 | 20649992 | 0.063918 | 1 |
| 10 | 21374261 | 21382760 | NM_00100 chr10 | 21380595 | 21381323 | 0.085765 | 1 |
| 10 | 21565600 | 21574099 | BC070401 chr10 | 21570493 | 21571090 | 0.070353 | 1 |
| 10 | 22507018 | 22515556 | NM_01154 chr10 | 22507052 | 22507644 | 0.069446 | 1 |
| 10 | 23632974 | 23641473 | NM_00100 chr10 | 23639485 | 23640147 | 0.078    | 1 |
| 10 | 23643910 | 23652409 | NM_00100 chr10 | 23650280 | 23651459 | 0.138824 | 1 |
| 10 | 23710638 | 23719137 | NM_00101 chr10 | 23716608 | 23717539 | 0.109647 | 1 |
| 10 | 23721030 | 23729529 | NM_00101 chr10 | 23727637 | 23728355 | 0.084588 | 1 |
| 10 | 23788829 | 23804950 | NM_00101 chr10 | 23792385 | 23793070 | 0.042551 | 1 |
| 10 | 23832733 | 23841302 | NM_01679 chr10 | 23837403 | 23838090 | 0.08028  | 1 |
| 10 | 24278923 | 24287511 | NM_01021 chr10 | 24281291 | 24281892 | 0.07009  | 1 |
| 10 | 25183174 | 25191673 | BC055044 chr10 | 25186086 | 25186743 | 0.077412 | 1 |
| 10 | 25765567 | 25774468 | NM_02988 chr10 | 25773586 | 25774259 | 0.075713 | 1 |
| 10 | 28351776 | 28360428 | NM_17866 chr10 | 28355305 | 28356086 | 0.090373 | 1 |
| 10 | 29386276 | 29394783 | NM_00907 chr10 | 29393506 | 29394578 | 0.126117 | 1 |
| 10 | 30529640 | 30538199 | NM_01390 chr10 | 30529859 | 30530695 | 0.09778  | 1 |
| 10 | 31132838 | 31141337 | NM_00941 chr10 | 31138757 | 31139360 | 0.071059 | 1 |
| 10 | 39673563 | 39682062 | NM_00100 chr10 | 39674867 | 39675467 | 0.070706 | 1 |
| 10 | 39673563 | 39682062 | NM_00100 chr10 | 39676049 | 39676757 | 0.083412 | 1 |
| 10 | 41741330 | 41749829 | NM_01156 chr10 | 41747234 | 41747878 | 0.075882 | 1 |
| 10 | 42269504 | 42278047 | NM_15222 chr10 | 42273439 | 42274339 | 0.105454 | 1 |



|    |          |          |          |       |          |          |          |   |
|----|----------|----------|----------|-------|----------|----------|----------|---|
| 10 | 45260304 | 45268846 | NM_17247 | chr10 | 45266535 | 45267499 | 0.112958 | 1 |
| 10 | 50578066 | 50586772 | NM_01137 | chr10 | 50579757 | 50580678 | 0.105892 | 1 |
| 10 | 57467338 | 57475854 | NM_02127 | chr10 | 57472989 | 57473712 | 0.085007 | 1 |
| 10 | 58785033 | 58801541 | NM_02353 | chr10 | 58786343 | 58787045 | 0.042583 | 1 |
| 10 | 58785033 | 58801541 | NM_02353 | chr10 | 58799185 | 58800143 | 0.05809  | 1 |
| 10 | 60224325 | 60232938 | NM_02977 | chr10 | 60227695 | 60229038 | 0.156025 | 1 |
| 10 | 62846868 | 62855367 | AF344871 | chr10 | 62850903 | 62851588 | 0.080706 | 1 |
| 10 | 63482600 | 63491612 | NM_17867 | chr10 | 63483436 | 63484497 | 0.11783  | 1 |
| 10 | 68113103 | 68121680 | NM_17779 | chr10 | 68115520 | 68116039 | 0.06062  | 1 |
| 10 | 71373491 | 71381994 | NM_17539 | chr10 | 71375138 | 71376775 | 0.192615 | 1 |
| 10 | 72044189 | 72052694 | NM_02563 | chr10 | 72049208 | 72049813 | 0.071244 | 1 |
| 10 | 73211183 | 73219682 | NM_02311 | chr10 | 73212411 | 73213565 | 0.135882 | 1 |
| 10 | 75001547 | 75010046 | NM_19886 | chr10 | 75003404 | 75004105 | 0.082588 | 1 |
| 10 | 75552235 | 75563581 | NM_02321 | chr10 | 75553813 | 75554802 | 0.087248 | 1 |
| 10 | 75691569 | 75700068 | NM_00911 | chr10 | 75697640 | 75698256 | 0.072588 | 1 |
| 10 | 76013383 | 76021901 | NM_08084 | chr10 | 76016235 | 76017281 | 0.122902 | 1 |
| 10 | 76064531 | 76073043 | NM_14600 | chr10 | 76070347 | 76071249 | 0.106073 | 1 |
| 10 | 76264014 | 76272513 | BC042440 | chr10 | 76265635 | 76266512 | 0.103294 | 1 |
| 10 | 77144360 | 77172719 | NM_01067 | chr10 | 77149332 | 77150444 | 0.039245 | 1 |
| 10 | 77144360 | 77172719 | NM_01067 | chr10 | 77151862 | 77152654 | 0.027962 | 1 |
| 10 | 77144360 | 77172719 | NM_01067 | chr10 | 77163517 | 77164202 | 0.024189 | 1 |
| 10 | 77444202 | 77452709 | NM_00964 | chr10 | 77448625 | 77449468 | 0.099201 | 1 |
| 10 | 77446971 | 77455643 | NM_01944 | chr10 | 77448625 | 77449468 | 0.097314 | 1 |
| 10 | 78431927 | 78440426 | NM_14704 | chr10 | 78437555 | 78438462 | 0.106824 | 1 |
| 10 | 79038405 | 79054867 | NM_00103 | chr10 | 79048538 | 79050499 | 0.119176 | 1 |
| 10 | 80031564 | 80040063 | BC005750 | chr10 | 80033048 | 80033924 | 0.103176 | 1 |
| 10 | 80415538 | 80424054 | NM_01031 | chr10 | 80418477 | 80419335 | 0.100857 | 1 |
| 10 | 80924605 | 80933354 | NM_01030 | chr10 | 80926819 | 80927430 | 0.069943 | 1 |
| 10 | 81919918 | 81928417 | AY702028 | chr10 | 81922315 | 81923089 | 0.091177 | 1 |
| 10 | 82117879 | 82126449 | NM_02910 | chr10 | 82119221 | 82120057 | 0.097655 | 1 |
| 10 | 86945736 | 86954272 | NM_00877 | chr10 | 86951239 | 86952007 | 0.090079 | 1 |
| 10 | 87390470 | 87398969 | M30774   | chr10 | 87397987 | 87398367 | 0.044824 | 1 |
| 10 | 88107875 | 88118821 | NM_01146 | chr10 | 88112137 | 88112967 | 0.075911 | 1 |
| 10 | 88107875 | 88118821 | NM_01146 | chr10 | 88113862 | 88114458 | 0.054536 | 1 |
| 10 | 88309791 | 88318335 | NM_14542 | chr10 | 88314945 | 88315952 | 0.117964 | 1 |
| 10 | 88685090 | 88693589 | NM_17877 | chr10 | 88689653 | 88690249 | 0.070235 | 1 |
| 10 | 89229952 | 89238451 | BC006745 | chr10 | 89230271 | 89231040 | 0.090588 | 1 |
| 10 | 89999526 | 90009385 | BC098373 | chr10 | 90002421 | 90003059 | 0.064807 | 1 |
| 10 | 89999526 | 90009385 | BC098373 | chr10 | 90006371 | 90007063 | 0.070284 | 1 |
| 10 | 92964431 | 92972930 | NM_17548 | chr10 | 92967980 | 92968630 | 0.076588 | 1 |
| 10 | 92967319 | 92975820 | BC118616 | chr10 | 92967980 | 92968630 | 0.07657  | 1 |
| 10 | 94991017 | 94999834 | NM_02772 | chr10 | 94994203 | 94994851 | 0.0736   | 1 |
| 10 | 95364351 | 95372937 | NM_00100 | chr10 | 95368373 | 95369198 | 0.096192 | 1 |
| 10 | 96989491 | 96998017 | NM_00852 | chr10 | 96989806 | 96990791 | 0.115633 | 1 |
| 10 | 98553510 | 98562009 | BC119390 | chr10 | 98554483 | 98555571 | 0.128118 | 1 |
| 10 | 99439512 | 99448139 | NM_01359 | chr10 | 99444235 | 99444853 | 0.071743 | 1 |
| 10 | 1.02E+08 | 1.02E+08 | NM_02624 | chr10 | 1.02E+08 | 1.02E+08 | 0.074809 | 1 |

|    |          |          |                |          |          |          |          |
|----|----------|----------|----------------|----------|----------|----------|----------|
| 10 | 1.02E+08 | 1.02E+08 | NM_02624 chr10 | 1.02E+08 | 1.02E+08 | 0.072343 | 1        |
| 10 | 1.08E+08 | 1.08E+08 | NM_00930 chr10 | 1.08E+08 | 1.08E+08 | 0.070183 | 1        |
| 10 | 1.1E+08  | 1.1E+08  | NM_00779 chr10 | 1.1E+08  | 1.1E+08  | 0.123505 | 1        |
| 10 | 1.1E+08  | 1.1E+08  | BC051527 chr10 | 1.1E+08  | 1.1E+08  | 0.092941 | 1        |
| 10 | 1.15E+08 | 1.15E+08 | NM_17339 chr10 | 1.15E+08 | 1.15E+08 | 0.092373 | 1        |
| 10 | 1.15E+08 | 1.15E+08 | NM_17339 chr10 | 1.15E+08 | 1.15E+08 | 0.14044  | 1        |
| 10 | 1.15E+08 | 1.15E+08 | NM_17339 chr10 | 1.15E+08 | 1.15E+08 | 0.060994 | 1        |
| 10 | 1.16E+08 | 1.16E+08 | BC010763 chr10 | 1.16E+08 | 1.16E+08 | 0.065349 | 1        |
| 10 | 1.16E+08 | 1.16E+08 | BC010763 chr10 | 1.16E+08 | 1.16E+08 | 0.066996 | 1        |
| 10 | 1.17E+08 | 1.17E+08 | NM_01737 chr10 | 1.17E+08 | 1.17E+08 | 0.068521 | 1        |
| 10 | 1.19E+08 | 1.19E+08 | AY255674 chr10 | 1.19E+08 | 1.19E+08 | 0.054701 | 1        |
| 10 | 1.2E+08  | 1.2E+08  | NM_01191 chr10 | 1.2E+08  | 1.2E+08  | 0.074834 | 1        |
| 10 | 1.25E+08 | 1.25E+08 | NM_17715 chr10 | 1.25E+08 | 1.25E+08 | 0.069342 | 1        |
| 10 | 1.27E+08 | 1.27E+08 | NM_17761 chr10 | 1.27E+08 | 1.27E+08 | 0.025494 | 1        |
| 10 | 1.27E+08 | 1.27E+08 | NM_00100 chr10 | 1.27E+08 | 1.27E+08 | 0.135613 | 1        |
| 10 | 1.27E+08 | 1.27E+08 | NM_14722 chr10 | 1.27E+08 | 1.27E+08 | 0.073647 | 1        |
| 10 | 1.27E+08 | 1.27E+08 | NM_14542 chr10 | 1.27E+08 | 1.27E+08 | 0.075651 | 1        |
| 10 | 1.28E+08 | 1.28E+08 | NM_14631 chr10 | 1.28E+08 | 1.28E+08 | 0.065765 | 1        |
| 10 | 1.29E+08 | 1.29E+08 | NM_14626 chr10 | 1.29E+08 | 1.29E+08 | 0.096588 | 1        |
| 10 | 1.29E+08 | 1.29E+08 | NM_14693 chr10 | 1.29E+08 | 1.29E+08 | 0.071647 | 1        |
| 11 | 3268880  | 3277395  | NM_17305 chr11 | 3269298  | 3269997  | 0.082198 | 1        |
| 11 | 3402325  | 3410824  | NM_17243 chr11 | 3407182  | 3407767  | 0.068941 | 1        |
| 11 | 6165233  | 6180862  | NM_02653 chr11 | 6176589  | 6177257  | 0.042802 | 1        |
| 11 | 6552536  | 6561039  | NM_01951 chr11 | 6559559  | 6560317  | 0.089252 | 1        |
| 11 | 7091782  | 7100281  | NM_00834 chr11 | 7092565  | 7093175  | 0.071882 | 1        |
| 11 | 8908632  | 8917167  | NM_00831 chr11 | 8909899  | 8910495  | 0.069939 | 1        |
| 11 | 8942595  | 8951096  | NM_00103 chr11 | 8947955  | 8949279  | 0.155846 | 1        |
| 11 | 8946409  | 8954994  | NM_17757 chr11 | 8947955  | 8949279  | 0.154321 | 1        |
| 11 | 11579928 | 11592868 | NM_00102 chr11 | 11579952 | 11580372 | 0.032532 | 1        |
| 11 | 12362304 | 12370807 | NM_17249 chr11 | 12364501 | 12365120 | 0.072907 | 1        |
| 11 | 20728561 | 20737070 | NM_17375 chr11 | 20732848 | 20733442 | 0.069918 | 1        |
| 11 | 26679108 | 26687607 | BC098095 chr11 | 26687101 | 26687701 | 0.059647 | 0.843594 |
| 11 | 28747204 | 28755709 | AY251056 chr11 | 28752136 | 28752730 | 0.069951 | 1        |
| 11 | 33402331 | 33410843 | NM_02314 chr11 | 33410408 | 33411134 | 0.051216 | 0.599725 |
| 11 | 34208822 | 34217321 | NM_00102 chr11 | 34209539 | 34210820 | 0.150824 | 1        |
| 11 | 36785167 | 36793666 | NM_01185 chr11 | 36788033 | 36788648 | 0.072471 | 1        |
| 11 | 42023224 | 42032353 | NM_01025 chr11 | 42027324 | 42028010 | 0.075246 | 1        |
| 11 | 43311729 | 43326816 | NM_02697 chr11 | 43314158 | 43315180 | 0.067802 | 1        |
| 11 | 43442456 | 43450955 | NM_00837 chr11 | 43447634 | 43448356 | 0.085059 | 1        |
| 11 | 44237486 | 44246008 | NM_00835 chr11 | 44244031 | 44244698 | 0.078376 | 1        |
| 11 | 45965327 | 45973826 | AB096093 chr11 | 45965534 | 45966218 | 0.080588 | 1        |
| 11 | 46007283 | 46015782 | NM_17252 chr11 | 46007830 | 46008516 | 0.080824 | 1        |
| 11 | 46648222 | 46656741 | NM_17875 chr11 | 46653596 | 46654214 | 0.072653 | 1        |
| 11 | 48650054 | 48666776 | BC020156 chr11 | 48664655 | 48665266 | 0.036596 | 1        |
| 11 | 48663563 | 48672062 | AF396656 chr11 | 48664655 | 48665266 | 0.072    | 1        |
| 11 | 48997439 | 49005938 | NM_14627 chr11 | 48997459 | 48999032 | 0.185176 | 1        |
| 11 | 49027969 | 49036512 | NM_17279 chr11 | 49030547 | 49031296 | 0.087781 | 1        |

|    |          |          |          |       |          |          |          |   |
|----|----------|----------|----------|-------|----------|----------|----------|---|
| 11 | 49130720 | 49139223 | NM_14647 | chr11 | 49132000 | 49133718 | 0.20214  | 1 |
| 11 | 49130720 | 49139223 | NM_14647 | chr11 | 49137973 | 49138858 | 0.104186 | 1 |
| 11 | 49281276 | 49293289 | NM_14646 | chr11 | 49287055 | 49287990 | 0.077909 | 1 |
| 11 | 49307576 | 49316075 | NM_00101 | chr11 | 49313651 | 49314323 | 0.079177 | 1 |
| 11 | 49331958 | 49340457 | NM_00101 | chr11 | 49337807 | 49338917 | 0.130706 | 1 |
| 11 | 49372610 | 49381109 | NM_00101 | chr11 | 49379017 | 49379546 | 0.062353 | 1 |
| 11 | 49389172 | 49397671 | NM_14646 | chr11 | 49395324 | 49395959 | 0.074824 | 1 |
| 11 | 49401346 | 49409845 | NM_20757 | chr11 | 49407509 | 49408214 | 0.083059 | 1 |
| 11 | 49684177 | 49700135 | NM_01696 | chr11 | 49693463 | 49694057 | 0.037283 | 1 |
| 11 | 50272035 | 50280534 | NM_17255 | chr11 | 50276890 | 50277584 | 0.081765 | 1 |
| 11 | 50794556 | 50803055 | NM_00893 | chr11 | 50797491 | 50798399 | 0.106941 | 1 |
| 11 | 50822126 | 50830625 | NM_14691 | chr11 | 50826152 | 50826774 | 0.073294 | 1 |
| 11 | 50896680 | 50905992 | NM_00932 | chr11 | 50901470 | 50902220 | 0.08064  | 1 |
| 11 | 51986855 | 51995354 | NM_20722 | chr11 | 51987763 | 51988782 | 0.12     | 1 |
| 11 | 52602129 | 52610628 | NM_17705 | chr11 | 52602985 | 52603664 | 0.08     | 1 |
| 11 | 54108198 | 54116702 | NM_01055 | chr11 | 54111760 | 54112482 | 0.085009 | 1 |
| 11 | 54141221 | 54150176 | NM_00103 | chr11 | 54149210 | 54149827 | 0.069004 | 1 |
| 11 | 54152326 | 54160858 | NM_00103 | chr11 | 54154868 | 54155542 | 0.079105 | 1 |
| 11 | 54152326 | 54160858 | NM_00103 | chr11 | 54157190 | 54157754 | 0.066214 | 1 |
| 11 | 56849379 | 56857878 | NM_00816 | chr11 | 56857057 | 56857860 | 0.094588 | 1 |
| 11 | 58304449 | 58312948 | NM_00101 | chr11 | 58308684 | 58309202 | 0.061059 | 1 |
| 11 | 58343766 | 58352265 | NM_14687 | chr11 | 58345862 | 58346776 | 0.107647 | 1 |
| 11 | 58391041 | 58399558 | NM_20715 | chr11 | 58396240 | 58396851 | 0.071848 | 1 |
| 11 | 58427166 | 58435665 | NM_14454 | chr11 | 58432650 | 58433371 | 0.084941 | 1 |
| 11 | 58450660 | 58459159 | NM_00103 | chr11 | 58454986 | 58455634 | 0.076353 | 1 |
| 11 | 58627123 | 58635622 | NM_14653 | chr11 | 58630933 | 58631590 | 0.077412 | 1 |
| 11 | 58641351 | 58649850 | NM_00101 | chr11 | 58646354 | 58646968 | 0.072353 | 1 |
| 11 | 58822306 | 58830805 | NM_00100 | chr11 | 58823055 | 58823720 | 0.078353 | 1 |
| 11 | 58977013 | 58985940 | NM_17378 | chr11 | 58978947 | 58980065 | 0.125336 | 1 |
| 11 | 59623469 | 59631968 | NM_14601 | chr11 | 59625198 | 59625827 | 0.074118 | 1 |
| 11 | 59915208 | 59923707 | NM_00902 | chr11 | 59922559 | 59923151 | 0.069765 | 1 |
| 11 | 59950277 | 59958778 | NM_00103 | chr11 | 59954663 | 59955614 | 0.111974 | 1 |
| 11 | 60279534 | 60288033 | NM_01086 | chr11 | 60284212 | 60285001 | 0.092941 | 1 |
| 11 | 61463516 | 61472020 | NM_02781 | chr11 | 61464844 | 61465734 | 0.104762 | 1 |
| 11 | 61534495 | 61542994 | NM_00103 | chr11 | 61535925 | 61536812 | 0.104471 | 1 |
| 11 | 62172713 | 62181212 | L78294   | chr11 | 62174542 | 62175284 | 0.087412 | 1 |
| 11 | 65549054 | 65557553 | BC029833 | chr11 | 65556102 | 65556718 | 0.072588 | 1 |
| 11 | 67608483 | 67616982 | NM_00101 | chr11 | 67614906 | 67616002 | 0.129059 | 1 |
| 11 | 68666749 | 68675313 | NM_02366 | chr11 | 68671489 | 68672148 | 0.077058 | 1 |
| 11 | 69390176 | 69405584 | NM_01164 | chr11 | 69400309 | 69401431 | 0.07288  | 1 |
| 11 | 69476338 | 69494510 | NM_14495 | chr11 | 69484347 | 69484957 | 0.033621 | 1 |
| 11 | 69476338 | 69494510 | NM_14495 | chr11 | 69489174 | 69489826 | 0.035932 | 1 |
| 11 | 70034467 | 70062041 | NM_00752 | chr11 | 70040423 | 70041040 | 0.022412 | 1 |
| 11 | 70069037 | 70077536 | NM_00744 | chr11 | 70069278 | 70070103 | 0.097177 | 1 |
| 11 | 70210626 | 70219125 | BC016444 | chr11 | 70218030 | 70218684 | 0.077059 | 1 |
| 11 | 70315472 | 70324008 | NM_02936 | chr11 | 70321763 | 70322468 | 0.082699 | 1 |
| 11 | 70432890 | 70441389 | NM_00960 | chr11 | 70433648 | 70434496 | 0.099882 | 1 |

|    |          |          |          |       |          |          |          |          |
|----|----------|----------|----------|-------|----------|----------|----------|----------|
| 11 | 70796661 | 70805221 | NM_00757 | chr11 | 70803381 | 70804002 | 0.072655 | 1        |
| 11 | 70829806 | 70838619 | NM_02599 | chr11 | 70835691 | 70836288 | 0.067847 | 1        |
| 11 | 71934489 | 71942988 | BC112411 | chr11 | 71935283 | 71935878 | 0.070118 | 1        |
| 11 | 72900778 | 72909289 | NM_00839 | chr11 | 72908007 | 72908503 | 0.058388 | 1        |
| 11 | 72951984 | 72960489 | NM_01035 | chr11 | 72959319 | 72959802 | 0.056901 | 1        |
| 11 | 73239677 | 73256419 | NM_14702 | chr11 | 73241455 | 73242349 | 0.053455 | 1        |
| 11 | 73403432 | 73411931 | NM_14702 | chr11 | 73408713 | 73409299 | 0.069059 | 1        |
| 11 | 73628776 | 73637275 | NM_14700 | chr11 | 73634855 | 73635685 | 0.097765 | 1        |
| 11 | 73798302 | 73806801 | NM_14671 | chr11 | 73803083 | 73804021 | 0.110471 | 1        |
| 11 | 73965310 | 73973809 | NM_14670 | chr11 | 73970641 | 73971463 | 0.096824 | 1        |
| 11 | 74098843 | 74107342 | NM_01100 | chr11 | 74103295 | 74104794 | 0.176471 | 1        |
| 11 | 74148925 | 74157424 | NM_14670 | chr11 | 74152786 | 74153526 | 0.087177 | 1        |
| 11 | 75724758 | 75733257 | NM_02954 | chr11 | 75726961 | 75727635 | 0.079412 | 1        |
| 11 | 76282145 | 76290649 | BC059064 | chr11 | 76282703 | 76283320 | 0.072663 | 1        |
| 11 | 76385070 | 76399922 | NM_19889 | chr11 | 76388677 | 76389262 | 0.039453 | 1        |
| 11 | 77345270 | 77353769 | BC019960 | chr11 | 77348044 | 77349165 | 0.132    | 1        |
| 11 | 77496350 | 77504849 | NM_00102 | chr11 | 77501589 | 77502228 | 0.075294 | 1        |
| 11 | 77925821 | 77934320 | NM_14543 | chr11 | 77929630 | 77930422 | 0.093294 | 1        |
| 11 | 77979223 | 77987722 | NM_00942 | chr11 | 77986710 | 77987354 | 0.075882 | 1        |
| 11 | 79055936 | 79065219 | NM_00104 | chr11 | 79059712 | 79060329 | 0.066566 | 1        |
| 11 | 79337386 | 79352804 | NM_14602 | chr11 | 79347028 | 79347710 | 0.044296 | 1        |
| 11 | 80668584 | 80677120 | NM_02936 | chr11 | 80669324 | 80670302 | 0.114677 | 1        |
| 11 | 80966497 | 80975098 | NM_00738 | chr11 | 80970691 | 80971491 | 0.093118 | 1        |
| 11 | 81868046 | 81876640 | NM_01133 | chr11 | 81872744 | 81873345 | 0.070041 | 1        |
| 11 | 82702319 | 82710839 | NM_03022 | chr11 | 82710728 | 82711763 | 0.013144 | 0.108108 |
| 11 | 82704285 | 82712806 | NM_01123 | chr11 | 82710728 | 82711763 | 0.121568 | 1        |
| 11 | 82845988 | 82862728 | NM_18154 | chr11 | 82850790 | 82851829 | 0.062123 | 1        |
| 11 | 82927040 | 82935543 | NM_01140 | chr11 | 82934334 | 82935011 | 0.079727 | 1        |
| 11 | 82985381 | 82995297 | NM_01141 | chr11 | 82987180 | 82988004 | 0.083191 | 1        |
| 11 | 82985381 | 82995297 | NM_01141 | chr11 | 82989429 | 82990435 | 0.101543 | 1        |
| 11 | 83001525 | 83010024 | NM_01140 | chr11 | 83004607 | 83005614 | 0.118588 | 1        |
| 11 | 83243151 | 83251650 | NM_00101 | chr11 | 83251023 | 83251697 | 0.073882 | 0.93037  |
| 11 | 83247889 | 83256390 | NM_02549 | chr11 | 83251023 | 83251697 | 0.079393 | 1        |
| 11 | 87639806 | 87648310 | NM_08042 | chr11 | 87642553 | 87643165 | 0.072075 | 1        |
| 11 | 87703590 | 87716117 | NM_14641 | chr11 | 87712476 | 87713202 | 0.05803  | 1        |
| 11 | 92908500 | 92918687 | NM_02829 | chr11 | 92916227 | 92917273 | 0.102768 | 1        |
| 11 | 93696307 | 93704808 | BC064014 | chr11 | 93699887 | 93700710 | 0.096918 | 1        |
| 11 | 93699330 | 93707856 | NM_00101 | chr11 | 93699887 | 93700710 | 0.096634 | 1        |
| 11 | 93722499 | 93730998 | NM_13401 | chr11 | 93726142 | 93726784 | 0.075647 | 1        |
| 11 | 94049984 | 94064639 | NM_18181 | chr11 | 94056628 | 94057825 | 0.081741 | 1        |
| 11 | 96591111 | 96599621 | NM_02896 | chr11 | 96592984 | 96593592 | 0.071555 | 1        |
| 11 | 97388717 | 97397216 | NM_01887 | chr11 | 97392716 | 97393417 | 0.082588 | 1        |
| 11 | 97809764 | 97818263 | NM_20723 | chr11 | 97810806 | 97811510 | 0.082941 | 1        |
| 11 | 99136532 | 99145041 | NM_13373 | chr11 | 99144429 | 99144997 | 0.066863 | 1        |
| 11 | 99151545 | 99160057 | NM_00103 | chr11 | 99152496 | 99152905 | 0.048162 | 1        |
| 11 | 99334849 | 99343348 | NM_21373 | chr11 | 99338794 | 99339451 | 0.077412 | 1        |
| 11 | 99334849 | 99343348 | NM_21373 | chr11 | 99341171 | 99341697 | 0.062    | 1        |

|    |          |          |          |       |          |          |          |          |
|----|----------|----------|----------|-------|----------|----------|----------|----------|
| 11 | 99665196 | 99673695 | NM_00101 | chr11 | 99667321 | 99667950 | 0.074118 | 1        |
| 11 | 99665196 | 99673695 | NM_00101 | chr11 | 99668992 | 99669997 | 0.118353 | 1        |
| 11 | 99718010 | 99733373 | NM_02756 | chr11 | 99730053 | 99730800 | 0.048685 | 1        |
| 11 | 99829786 | 99838302 | NM_02798 | chr11 | 99832049 | 99832690 | 0.075379 | 1        |
| 11 | 99901704 | 99918315 | NM_01688 | chr11 | 99907410 | 99907823 | 0.024922 | 1        |
| 11 | 99901704 | 99918315 | NM_01688 | chr11 | 99912057 | 99912875 | 0.049302 | 1        |
| 11 | 99901704 | 99918315 | NM_01688 | chr11 | 99914356 | 99915922 | 0.094329 | 1        |
| 11 | 99901704 | 99918315 | NM_01688 | chr11 | 99916180 | 99917526 | 0.081086 | 1        |
| 11 | 99919232 | 99927731 | NM_00847 | chr11 | 99921060 | 99921650 | 0.069529 | 1        |
| 11 | 99935101 | 99943656 | NM_01066 | chr11 | 99941736 | 99942334 | 0.070009 | 1        |
| 11 | 1E+08    | 1E+08    | NM_20125 | chr11 | 1E+08    | 1E+08    | 0.130824 | 1        |
| 11 | 1E+08    | 1E+08    | NM_01059 | chr11 | 1E+08    | 1E+08    | 0.064323 | 1        |
| 11 | 1.02E+08 | 1.02E+08 | NM_01079 | chr11 | 1.02E+08 | 1.02E+08 | 0.070471 | 1        |
| 11 | 1.02E+08 | 1.02E+08 | NM_17805 | chr11 | 1.02E+08 | 1.02E+08 | 0.064151 | 1        |
| 11 | 1.03E+08 | 1.03E+08 | NM_00812 | chr11 | 1.03E+08 | 1.03E+08 | 0.068706 | 1        |
| 11 | 1.03E+08 | 1.03E+08 | BC050840 | chr11 | 1.03E+08 | 1.03E+08 | 0.071452 | 1        |
| 11 | 1.03E+08 | 1.03E+08 | NM_02708 | chr11 | 1.03E+08 | 1.03E+08 | 0.045507 | 1        |
| 11 | 1.04E+08 | 1.04E+08 | NM_01171 | chr11 | 1.04E+08 | 1.04E+08 | 0.070517 | 1        |
| 11 | 1.07E+08 | 1.07E+08 | BC060114 | chr11 | 1.07E+08 | 1.07E+08 | 0.130824 | 1        |
| 11 | 1.07E+08 | 1.07E+08 | BC060114 | chr11 | 1.07E+08 | 1.07E+08 | 0.101647 | 1        |
| 11 | 1.08E+08 | 1.08E+08 | NM_01347 | chr11 | 1.08E+08 | 1.08E+08 | 0.068816 | 1        |
| 11 | 1.1E+08  | 1.1E+08  | NM_01385 | chr11 | 1.1E+08  | 1.1E+08  | 0.078235 | 1        |
| 11 | 1.11E+08 | 1.11E+08 | NM_01060 | chr11 | 1.11E+08 | 1.11E+08 | 0.05273  | 1        |
| 11 | 1.13E+08 | 1.13E+08 | BC006965 | chr11 | 1.13E+08 | 1.13E+08 | 0.070464 | 1        |
| 11 | 1.13E+08 | 1.13E+08 | NM_01358 | chr11 | 1.13E+08 | 1.13E+08 | 0.078449 | 1        |
| 11 | 1.15E+08 | 1.15E+08 | NM_14721 | chr11 | 1.15E+08 | 1.15E+08 | 0.067562 | 1        |
| 11 | 1.15E+08 | 1.15E+08 | NM_17205 | chr11 | 1.15E+08 | 1.15E+08 | 0.068    | 1        |
| 11 | 1.15E+08 | 1.15E+08 | NM_17803 | chr11 | 1.15E+08 | 1.15E+08 | 0.062588 | 1        |
| 11 | 1.15E+08 | 1.15E+08 | NM_17803 | chr11 | 1.15E+08 | 1.15E+08 | 0.005294 | 0.04644  |
| 11 | 1.15E+08 | 1.15E+08 | NM_17280 | chr11 | 1.15E+08 | 1.15E+08 | 0.114    | 1        |
| 11 | 1.15E+08 | 1.15E+08 | NM_17280 | chr11 | 1.15E+08 | 1.15E+08 | 0.075647 | 1        |
| 11 | 1.15E+08 | 1.15E+08 | NM_17280 | chr11 | 1.15E+08 | 1.15E+08 | 0.119765 | 1        |
| 11 | 1.16E+08 | 1.16E+08 | NM_00824 | chr11 | 1.16E+08 | 1.16E+08 | 0.032818 | 1        |
| 11 | 1.17E+08 | 1.17E+08 | NM_01135 | chr11 | 1.17E+08 | 1.17E+08 | 0.048245 | 1        |
| 11 | 1.19E+08 | 1.19E+08 | NM_17739 | chr11 | 1.19E+08 | 1.19E+08 | 0.072588 | 1        |
| 11 | 1.2E+08  | 1.2E+08  | NM_19842 | chr11 | 1.2E+08  | 1.2E+08  | 0.050608 | 1        |
| 11 | 1.2E+08  | 1.2E+08  | NM_01377 | chr11 | 1.2E+08  | 1.2E+08  | 0.042314 | 1        |
| 11 | 1.21E+08 | 1.21E+08 | NM_00985 | chr11 | 1.21E+08 | 1.21E+08 | 0.084361 | 1        |
| 11 | 1.21E+08 | 1.21E+08 | NM_00100 | chr11 | 1.21E+08 | 1.21E+08 | 0.079544 | 1        |
| 11 | 1.21E+08 | 1.21E+08 | NM_02540 | chr11 | 1.21E+08 | 1.21E+08 | 0.061057 | 0.769572 |
| 12 | 3829021  | 3837520  | AF068625 | chr12 | 3833911  | 3834548  | 0.075059 | 1        |
| 12 | 4127363  | 4136575  | NM_13830 | chr12 | 4130282  | 4130988  | 0.076739 | 1        |
| 12 | 4749571  | 4758070  | NM_02910 | chr12 | 4756647  | 4757364  | 0.084471 | 1        |
| 12 | 4859797  | 4868331  | NM_17341 | chr12 | 4860554  | 4861180  | 0.073462 | 1        |
| 12 | 8025737  | 8038909  | NM_00969 | chr12 | 8030923  | 8031561  | 0.048508 | 1        |
| 12 | 8622575  | 8631074  | NM_17780 | chr12 | 8628272  | 8629171  | 0.105882 | 1        |
| 12 | 10923772 | 10932304 | BC108372 | chr12 | 10924604 | 10925439 | 0.097973 | 1        |

|    |          |          |          |       |          |          |          |          |
|----|----------|----------|----------|-------|----------|----------|----------|----------|
| 12 | 12043004 | 12051510 | BC081441 | chr12 | 12048937 | 12049904 | 0.113789 | 1        |
| 12 | 12282163 | 12290662 | BC049664 | chr12 | 12285552 | 12286164 | 0.072118 | 1        |
| 12 | 14171987 | 14183578 | NM_02900 | chr12 | 14176635 | 14177441 | 0.069617 | 1        |
| 12 | 16780222 | 16788721 | NM_01576 | chr12 | 16783695 | 16784252 | 0.065647 | 1        |
| 12 | 35626272 | 35634788 | NM_00101 | chr12 | 35628418 | 35629281 | 0.101444 | 1        |
| 12 | 36720484 | 36734468 | NM_02769 | chr12 | 36731865 | 36732736 | 0.062353 | 1        |
| 12 | 37612812 | 37621412 | NM_00858 | chr12 | 37620042 | 37620998 | 0.111266 | 1        |
| 12 | 38384603 | 38393470 | NM_17868 | chr12 | 38391061 | 38392120 | 0.119531 | 1        |
| 12 | 52508977 | 52517574 | NM_00772 | chr12 | 52512565 | 52513446 | 0.102582 | 1        |
| 12 | 52880709 | 52889208 | BC086656 | chr12 | 52882827 | 52883421 | 0.07     | 1        |
| 12 | 70096818 | 70105317 | NM_14603 | chr12 | 70100973 | 70101867 | 0.105294 | 1        |
| 12 | 70100131 | 70108645 | NM_02558 | chr12 | 70100973 | 70101867 | 0.105109 | 1        |
| 12 | 70820441 | 70828940 | BC050784 | chr12 | 70826535 | 70827154 | 0.072941 | 1        |
| 12 | 71143723 | 71152230 | NM_13319 | chr12 | 71143987 | 71144636 | 0.076399 | 1        |
| 12 | 73152078 | 73161562 | NM_00100 | chr12 | 73159570 | 73160592 | 0.107855 | 1        |
| 12 | 74820742 | 74829367 | NM_01043 | chr12 | 74822037 | 74822685 | 0.075238 | 1        |
| 12 | 75075055 | 75083554 | AB102950 | chr12 | 75078525 | 75079608 | 0.127529 | 1        |
| 12 | 76221153 | 76229793 | NM_02327 | chr12 | 76223650 | 76224424 | 0.089689 | 1        |
| 12 | 76954229 | 76962728 | BC082586 | chr12 | 76958310 | 76959067 | 0.089177 | 1        |
| 12 | 81103423 | 81111922 | AF031663 | chr12 | 81104872 | 81105507 | 0.074824 | 1        |
| 12 | 81703407 | 81711906 | NM_17868 | chr12 | 81706303 | 81706993 | 0.081294 | 1        |
| 12 | 82544217 | 82552716 | NM_00103 | chr12 | 82545627 | 82546308 | 0.080235 | 1        |
| 12 | 83169433 | 83177932 | NM_17257 | chr12 | 83176851 | 83177764 | 0.107529 | 1        |
| 12 | 84327169 | 84335668 | BC048572 | chr12 | 84333503 | 84334111 | 0.071647 | 1        |
| 12 | 85948095 | 85956594 | BC055465 | chr12 | 85953589 | 85954569 | 0.115412 | 1        |
| 12 | 86357004 | 86365503 | NM_01023 | chr12 | 86357026 | 86357660 | 0.074706 | 1        |
| 12 | 87244220 | 87252719 | NM_01193 | chr12 | 87251843 | 87252606 | 0.089882 | 1        |
| 12 | 87989143 | 87997642 | NM_02241 | chr12 | 87996869 | 87997595 | 0.085529 | 1        |
| 12 | 89302456 | 89310955 | BC060719 | chr12 | 89302451 | 89303317 | 0.101412 | 0.994233 |
| 12 | 89302456 | 89310955 | BC060719 | chr12 | 89305557 | 89306245 | 0.081059 | 1        |
| 12 | 89302456 | 89310955 | BC060719 | chr12 | 89307083 | 89308124 | 0.122588 | 1        |
| 12 | 1.01E+08 | 1.01E+08 | NM_17549 | chr12 | 1.01E+08 | 1.01E+08 | 0.109366 | 1        |
| 12 | 1.05E+08 | 1.05E+08 | AB081470 | chr12 | 1.05E+08 | 1.05E+08 | 0.108941 | 1        |
| 12 | 1.05E+08 | 1.05E+08 | AB081470 | chr12 | 1.05E+08 | 1.05E+08 | 0.079412 | 1        |
| 12 | 1.05E+08 | 1.05E+08 | NM_05315 | chr12 | 1.05E+08 | 1.05E+08 | 0.022    | 0.308072 |
| 12 | 1.05E+08 | 1.05E+08 | NM_17250 | chr12 | 1.05E+08 | 1.05E+08 | 0.123529 | 1        |
| 12 | 1.1E+08  | 1.1E+08  | NM_18410 | chr12 | 1.1E+08  | 1.1E+08  | 0.082353 | 1        |
| 12 | 1.12E+08 | 1.12E+08 | BC115831 | chr12 | 1.12E+08 | 1.12E+08 | 0.075412 | 1        |
| 12 | 1.13E+08 | 1.13E+08 | NM_14545 | chr12 | 1.13E+08 | 1.13E+08 | 0.068763 | 1        |
| 12 | 1.13E+08 | 1.13E+08 | NM_01992 | chr12 | 1.13E+08 | 1.13E+08 | 0.061446 | 1        |
| 12 | 1.13E+08 | 1.13E+08 | NM_01992 | chr12 | 1.13E+08 | 1.13E+08 | 0.073455 | 1        |
| 12 | 1.14E+08 | 1.14E+08 | BC057672 | chr12 | 1.14E+08 | 1.14E+08 | 0.083177 | 1        |
| 12 | 1.14E+08 | 1.14E+08 | BC057672 | chr12 | 1.14E+08 | 1.14E+08 | 0.109529 | 1        |
| 12 | 1.14E+08 | 1.14E+08 | BC092066 | chr12 | 1.14E+08 | 1.14E+08 | 0.070588 | 1        |
| 12 | 1.17E+08 | 1.17E+08 | BC021371 | chr12 | 1.17E+08 | 1.17E+08 | 0.080353 | 1        |
| 12 | 1.17E+08 | 1.17E+08 | NM_01121 | chr12 | 1.17E+08 | 1.17E+08 | 0.075003 | 1        |
| 12 | 1.18E+08 | 1.18E+08 | NM_14604 | chr12 | 1.18E+08 | 1.18E+08 | 0.075294 | 1        |

|    |          |          |          |       |          |          |          |          |
|----|----------|----------|----------|-------|----------|----------|----------|----------|
| 12 | 1.2E+08  | 1.2E+08  | BC125343 | chr12 | 1.2E+08  | 1.2E+08  | 0.076941 | 1        |
| 13 | 3571939  | 3580853  | BC016423 | chr13 | 3572091  | 3572690  | 0.067302 | 1        |
| 13 | 3801049  | 3809562  | NM_02741 | chr13 | 3801830  | 3802435  | 0.071177 | 1        |
| 13 | 4605883  | 4614410  | NM_01885 | chr13 | 4605873  | 4606722  | 0.098499 | 0.988235 |
| 13 | 13852916 | 13861527 | NM_01028 | chr13 | 13860022 | 13860989 | 0.112401 | 1        |
| 13 | 14399380 | 14407892 | NM_00894 | chr13 | 14400585 | 14401499 | 0.107483 | 1        |
| 13 | 19186420 | 19194919 | M54990   | chr13 | 19189228 | 19190248 | 0.120118 | 1        |
| 13 | 19737917 | 19746416 | NM_17568 | chr13 | 19739784 | 19740659 | 0.103059 | 1        |
| 13 | 21078265 | 21086764 | NM_14653 | chr13 | 21084429 | 21085353 | 0.108824 | 1        |
| 13 | 21445867 | 21462920 | NM_00101 | chr13 | 21454493 | 21455175 | 0.040049 | 1        |
| 13 | 21506391 | 21518311 | BC099474 | chr13 | 21509976 | 21510569 | 0.049828 | 1        |
| 13 | 21579420 | 21587919 | NM_14654 | chr13 | 21580679 | 21581496 | 0.096235 | 1        |
| 13 | 21644487 | 21652986 | NM_14654 | chr13 | 21645993 | 21646972 | 0.115294 | 1        |
| 13 | 22384003 | 22392502 | NM_13421 | chr13 | 22388348 | 22389059 | 0.083765 | 1        |
| 13 | 22384003 | 22392502 | NM_13421 | chr13 | 22389331 | 22390393 | 0.125059 | 1        |
| 13 | 22476083 | 22484582 | NM_13422 | chr13 | 22479361 | 22479916 | 0.065412 | 1        |
| 13 | 22597896 | 22606395 | NM_13421 | chr13 | 22601365 | 22601967 | 0.070941 | 1        |
| 13 | 23164108 | 23172607 | NM_13423 | chr13 | 23168192 | 23169475 | 0.151059 | 1        |
| 13 | 23189490 | 23197989 | NM_13423 | chr13 | 23191540 | 23192628 | 0.128118 | 1        |
| 13 | 23189490 | 23197989 | NM_13423 | chr13 | 23193545 | 23194430 | 0.104235 | 1        |
| 13 | 23238085 | 23246584 | NM_13424 | chr13 | 23241334 | 23242509 | 0.138353 | 1        |
| 13 | 23374135 | 23382673 | NM_17258 | chr13 | 23374189 | 23374927 | 0.086544 | 1        |
| 13 | 23919973 | 23928474 | NM_17701 | chr13 | 23927922 | 23928457 | 0.063044 | 1        |
| 13 | 24418364 | 24426864 | NM_00771 | chr13 | 24424348 | 24425206 | 0.101047 | 1        |
| 13 | 27243895 | 27252409 | NM_00886 | chr13 | 27248607 | 27249347 | 0.087023 | 1        |
| 13 | 27314092 | 27322592 | NM_01116 | chr13 | 27321335 | 27321964 | 0.074109 | 1        |
| 13 | 28017687 | 28026187 | NM_01116 | chr13 | 28018920 | 28019942 | 0.120339 | 1        |
| 13 | 30337922 | 30346421 | NM_17732 | chr13 | 30338037 | 30338641 | 0.071177 | 1        |
| 13 | 33662868 | 33671367 | NM_00107 | chr13 | 33671023 | 33671710 | 0.040588 | 0.501453 |
| 13 | 33910674 | 33919173 | NM_14894 | chr13 | 33910694 | 33911353 | 0.077647 | 1        |
| 13 | 33966152 | 33977117 | NM_02028 | chr13 | 33973529 | 33974008 | 0.043772 | 1        |
| 13 | 38197950 | 38214932 | NM_02638 | chr13 | 38198494 | 38199239 | 0.043926 | 1        |
| 13 | 40296498 | 40304997 | AF548111 | chr13 | 40302045 | 40302654 | 0.071765 | 1        |
| 13 | 41088115 | 41096616 | BC050009 | chr13 | 41093997 | 41094767 | 0.090685 | 1        |
| 13 | 41654417 | 41662916 | NM_17780 | chr13 | 41655183 | 41655799 | 0.072588 | 1        |
| 13 | 43127811 | 43139359 | NM_00100 | chr13 | 43137674 | 43138831 | 0.100268 | 1        |
| 13 | 43790157 | 43798674 | NM_00985 | chr13 | 43792733 | 43793400 | 0.078422 | 1        |
| 13 | 46278693 | 46287192 | NM_00100 | chr13 | 46280282 | 46280969 | 0.080941 | 1        |
| 13 | 49613983 | 49623591 | NM_00876 | chr13 | 49619393 | 49620005 | 0.063794 | 1        |
| 13 | 50424374 | 50432873 | BC040428 | chr13 | 50424732 | 50425973 | 0.146118 | 1        |
| 13 | 50424374 | 50432873 | BC040428 | chr13 | 50428161 | 50428775 | 0.072353 | 1        |
| 13 | 50473804 | 50482303 | NM_00103 | chr13 | 50480485 | 50481316 | 0.097882 | 1        |
| 13 | 51415260 | 51423773 | NM_01010 | chr13 | 51417323 | 51418145 | 0.096664 | 1        |
| 13 | 51577081 | 51585580 | NM_00916 | chr13 | 51579706 | 51580334 | 0.074    | 1        |
| 13 | 52603314 | 52611813 | NM_01151 | chr13 | 52608297 | 52609266 | 0.114118 | 1        |
| 13 | 54374974 | 54390709 | NM_00994 | chr13 | 54376331 | 54377464 | 0.072064 | 1        |
| 13 | 55028027 | 55036956 | NM_00103 | chr13 | 55028554 | 55029167 | 0.068757 | 1        |

|    |          |          |          |       |          |          |          |          |
|----|----------|----------|----------|-------|----------|----------|----------|----------|
| 13 | 55156262 | 55167563 | NM_00801 | chr13 | 55165098 | 55165805 | 0.062644 | 1        |
| 13 | 56605325 | 56621730 | NM_00936 | chr13 | 56613463 | 56614309 | 0.051628 | 1        |
| 13 | 58222716 | 58231259 | NM_15223 | chr13 | 58227928 | 58228647 | 0.08427  | 1        |
| 13 | 58271297 | 58279796 | AB033130 | chr13 | 58272231 | 58272850 | 0.072941 | 1        |
| 13 | 59816630 | 59825129 | BC023880 | chr13 | 59816621 | 59817228 | 0.070471 | 0.985197 |
| 13 | 59816630 | 59825129 | BC023880 | chr13 | 59819211 | 59819832 | 0.073177 | 1        |
| 13 | 60809968 | 60818467 | NM_02734 | chr13 | 60814727 | 60815326 | 0.070588 | 1        |
| 13 | 60943675 | 60957558 | NM_00941 | chr13 | 60946155 | 60947111 | 0.068928 | 1        |
| 13 | 64095909 | 64104408 | NM_00829 | chr13 | 64096770 | 64097365 | 0.070118 | 1        |
| 13 | 64159902 | 64168421 | NM_17549 | chr13 | 64161294 | 64162162 | 0.101995 | 1        |
| 13 | 67660903 | 67674803 | NM_00101 | chr13 | 67668039 | 67668649 | 0.043954 | 1        |
| 13 | 67997106 | 68005605 | NM_00100 | chr13 | 67999162 | 67999814 | 0.076824 | 1        |
| 13 | 68356440 | 68364939 | BC048507 | chr13 | 68361619 | 68362291 | 0.079177 | 1        |
| 13 | 71066028 | 71079811 | BC026613 | chr13 | 71073543 | 71074423 | 0.063915 | 1        |
| 13 | 71066028 | 71079811 | BC026613 | chr13 | 71076618 | 71077291 | 0.048897 | 1        |
| 13 | 73791011 | 73799542 | NM_05316 | chr13 | 73791176 | 73791769 | 0.06962  | 1        |
| 13 | 74086992 | 74095512 | NM_00935 | chr13 | 74087315 | 74087806 | 0.05774  | 1        |
| 13 | 74164198 | 74172782 | NM_02887 | chr13 | 74165103 | 74165988 | 0.103203 | 1        |
| 13 | 74164198 | 74172782 | NM_02887 | chr13 | 74169966 | 74170590 | 0.072801 | 1        |
| 13 | 74397840 | 74406339 | NM_00102 | chr13 | 74401254 | 74402046 | 0.093294 | 1        |
| 13 | 74401169 | 74409769 | NM_02718 | chr13 | 74401254 | 74402046 | 0.092199 | 1        |
| 13 | 74423864 | 74432363 | NM_02770 | chr13 | 74432165 | 74432853 | 0.023412 | 0.288824 |
| 13 | 76221940 | 76230439 | BC006925 | chr13 | 76229092 | 76229771 | 0.08     | 1        |
| 13 | 82008219 | 82016718 | AF405694 | chr13 | 82011587 | 82012350 | 0.089882 | 1        |
| 13 | 82045478 | 82053977 | AF405693 | chr13 | 82051397 | 82052373 | 0.114941 | 1        |
| 13 | 90213949 | 90222522 | D16263   | chr13 | 90220795 | 90221614 | 0.095638 | 1        |
| 13 | 91680174 | 91688673 | BC023455 | chr13 | 91686992 | 91687976 | 0.115882 | 1        |
| 13 | 93674426 | 93682925 | NM_03023 | chr13 | 93674423 | 93675268 | 0.099177 | 0.996454 |
| 13 | 97179542 | 97195573 | BC058282 | chr13 | 97185022 | 97185618 | 0.037238 | 1        |
| 13 | 97179542 | 97195573 | BC058282 | chr13 | 97189635 | 97190379 | 0.04647  | 1        |
| 13 | 99790379 | 99800988 | NM_00102 | chr13 | 99791834 | 99792440 | 0.05721  | 1        |
| 13 | 1E+08    | 1E+08    | NM_00100 | chr13 | 1E+08    | 1E+08    | 0.100824 | 1        |
| 13 | 1.04E+08 | 1.04E+08 | NM_00853 | chr13 | 1.04E+08 | 1.04E+08 | 0.08136  | 1        |
| 13 | 1.06E+08 | 1.06E+08 | NM_02575 | chr13 | 1.06E+08 | 1.06E+08 | 0.088346 | 1        |
| 13 | 1.07E+08 | 1.07E+08 | NM_00830 | chr13 | 1.07E+08 | 1.07E+08 | 0.106018 | 1        |
| 13 | 1.09E+08 | 1.09E+08 | BC021311 | chr13 | 1.09E+08 | 1.09E+08 | 0.072941 | 1        |
| 13 | 1.11E+08 | 1.11E+08 | NM_17771 | chr13 | 1.11E+08 | 1.11E+08 | 0.063015 | 1        |
| 13 | 1.14E+08 | 1.14E+08 | AY509150 | chr13 | 1.14E+08 | 1.14E+08 | 0.133765 | 1        |
| 13 | 1.14E+08 | 1.14E+08 | NM_00819 | chr13 | 1.14E+08 | 1.14E+08 | 0.092941 | 1        |
| 13 | 1.18E+08 | 1.18E+08 | BC022679 | chr13 | 1.18E+08 | 1.18E+08 | 0.095647 | 1        |
| 13 | 1.18E+08 | 1.18E+08 | BC021881 | chr13 | 1.18E+08 | 1.18E+08 | 0.113873 | 1        |
| 14 | 4277097  | 4285596  | NM_02594 | chr14 | 4276759  | 4277871  | 0.091177 | 0.696316 |
| 14 | 12799758 | 12808839 | NM_13922 | chr14 | 12803430 | 12804146 | 0.078947 | 1        |
| 14 | 13115380 | 13123879 | NM_14702 | chr14 | 13119273 | 13119908 | 0.074824 | 1        |
| 14 | 17122380 | 17130962 | NM_00945 | chr14 | 17122374 | 17122961 | 0.067809 | 0.989796 |
| 14 | 18748893 | 18757392 | BC021599 | chr14 | 18749888 | 18750472 | 0.068824 | 1        |
| 14 | 18765446 | 18773945 | NM_01031 | chr14 | 18765237 | 18765916 | 0.055412 | 0.692647 |



|    |          |          |          |       |          |          |          |   |
|----|----------|----------|----------|-------|----------|----------|----------|---|
| 14 | 19130714 | 19139317 | NM_17237 | chr14 | 19134365 | 19134990 | 0.072757 | 1 |
| 14 | 19134123 | 19142636 | NM_02747 | chr14 | 19134365 | 19134990 | 0.073526 | 1 |
| 14 | 19332597 | 19341096 | NM_00891 | chr14 | 19338387 | 19339415 | 0.121059 | 1 |
| 14 | 19580072 | 19588640 | NM_17859 | chr14 | 19581797 | 19582422 | 0.073054 | 1 |
| 14 | 24521338 | 24529853 | NM_13408 | chr14 | 24522426 | 24523025 | 0.070456 | 1 |
| 14 | 25290867 | 25299366 | BC021457 | chr14 | 25296756 | 25297346 | 0.069529 | 1 |
| 14 | 26156950 | 26165468 | BC012262 | chr14 | 26159103 | 26160078 | 0.114567 | 1 |
| 14 | 28844312 | 28854141 | NM_17534 | chr14 | 28847948 | 28848649 | 0.071414 | 1 |
| 14 | 29702549 | 29718032 | NM_01874 | chr14 | 29709373 | 29710186 | 0.05257  | 1 |
| 14 | 31424628 | 31433127 | NM_17713 | chr14 | 31432309 | 31432897 | 0.069294 | 1 |
| 14 | 31831514 | 31840013 | BC061072 | chr14 | 31836360 | 31837216 | 0.100824 | 1 |
| 14 | 40089349 | 40099876 | NM_00916 | chr14 | 40093174 | 40094011 | 0.079597 | 1 |
| 14 | 43778753 | 43787252 | NM_00896 | chr14 | 43783758 | 43784744 | 0.116118 | 1 |
| 14 | 43904072 | 43913196 | NM_00896 | chr14 | 43912593 | 43913176 | 0.064    | 1 |
| 14 | 46388438 | 46396937 | NM_03023 | chr14 | 46394472 | 46395145 | 0.079294 | 1 |
| 14 | 46423229 | 46431728 | BC048149 | chr14 | 46424546 | 46425114 | 0.066941 | 1 |
| 14 | 48445289 | 48453788 | NM_02923 | chr14 | 48446290 | 48446969 | 0.08     | 1 |
| 14 | 49601097 | 49609596 | NM_20715 | chr14 | 49603197 | 49603935 | 0.086941 | 1 |
| 14 | 50078211 | 50086710 | NM_01939 | chr14 | 50082493 | 50083289 | 0.093765 | 1 |
| 14 | 50115375 | 50123874 | NM_00744 | chr14 | 50122129 | 50123376 | 0.146824 | 1 |
| 14 | 50119640 | 50128145 | NM_00101 | chr14 | 50122129 | 50123376 | 0.14672  | 1 |
| 14 | 50809591 | 50818090 | NM_00103 | chr14 | 50817257 | 50817893 | 0.074941 | 1 |
| 14 | 51090954 | 51099453 | BC012433 | chr14 | 51095714 | 51096155 | 0.052    | 1 |
| 14 | 51288916 | 51301002 | NM_14643 | chr14 | 51297073 | 51297529 | 0.037809 | 1 |
| 14 | 53733247 | 53742091 | NM_01697 | chr14 | 53733798 | 53734516 | 0.081289 | 1 |
| 14 | 54475763 | 54493519 | NM_00873 | chr14 | 54478392 | 54479139 | 0.042124 | 1 |
| 14 | 54966035 | 54974543 | NM_00857 | chr14 | 54973841 | 54974464 | 0.073334 | 1 |
| 14 | 54990194 | 54998711 | NM_00857 | chr14 | 54996678 | 54997444 | 0.090045 | 1 |
| 14 | 55036842 | 55045344 | NM_00857 | chr14 | 55039913 | 55040646 | 0.086323 | 1 |
| 14 | 55072197 | 55080696 | NM_01037 | chr14 | 55074026 | 55074800 | 0.091177 | 1 |
| 14 | 55084180 | 55092679 | NM_01037 | chr14 | 55085546 | 55086619 | 0.126353 | 1 |
| 14 | 56473017 | 56481816 | NM_14583 | chr14 | 56475085 | 56475970 | 0.100682 | 1 |
| 14 | 56685911 | 56694459 | AB023958 | chr14 | 56689235 | 56690126 | 0.10434  | 1 |
| 14 | 59326430 | 59334955 | NM_02811 | chr14 | 59326808 | 59327401 | 0.069669 | 1 |
| 14 | 59732692 | 59741197 | NM_02743 | chr14 | 59734926 | 59735378 | 0.053257 | 1 |
| 14 | 60547650 | 60564277 | NM_20697 | chr14 | 60559285 | 60560570 | 0.077339 | 1 |
| 14 | 62384565 | 62393064 | NM_17762 | chr14 | 62387096 | 62387855 | 0.089412 | 1 |
| 14 | 62400527 | 62409026 | BC060626 | chr14 | 62402117 | 62402676 | 0.065882 | 1 |
| 14 | 62808474 | 62817009 | NM_02822 | chr14 | 62808511 | 62809109 | 0.070173 | 1 |
| 14 | 62891816 | 62900315 | NM_01144 | chr14 | 62896549 | 62897552 | 0.118118 | 1 |
| 14 | 62939391 | 62947900 | NM_02635 | chr14 | 62940927 | 62941601 | 0.079318 | 1 |
| 14 | 62978720 | 62987219 | BC031365 | chr14 | 62980121 | 62980736 | 0.072471 | 1 |
| 14 | 63406505 | 63416013 | NM_02632 | chr14 | 63408102 | 63408693 | 0.062257 | 1 |
| 14 | 63928231 | 63936730 | BC055700 | chr14 | 63928969 | 63929601 | 0.074471 | 1 |
| 14 | 63928231 | 63936730 | BC055700 | chr14 | 63931821 | 63932412 | 0.069647 | 1 |
| 14 | 63928231 | 63936730 | BC055700 | chr14 | 63934252 | 63935010 | 0.089294 | 1 |
| 14 | 64362877 | 64371381 | BC119372 | chr14 | 64365057 | 64365875 | 0.096296 | 1 |

|    |          |          |          |       |          |          |          |          |
|----|----------|----------|----------|-------|----------|----------|----------|----------|
| 14 | 64889922 | 64898421 | BC051636 | chr14 | 64891646 | 64892327 | 0.080235 | 1        |
| 14 | 64916735 | 64931450 | NM_01349 | chr14 | 64925325 | 64925949 | 0.042471 | 1        |
| 14 | 67606548 | 67615172 | NM_01008 | chr14 | 67608917 | 67609651 | 0.085217 | 1        |
| 14 | 67606548 | 67615172 | NM_01008 | chr14 | 67614504 | 67615142 | 0.074087 | 1        |
| 14 | 69186597 | 69195096 | NM_14598 | chr14 | 69193657 | 69194267 | 0.071882 | 1        |
| 14 | 73460473 | 73472612 | NM_01690 | chr14 | 73462640 | 73463315 | 0.055684 | 1        |
| 14 | 73460473 | 73472612 | NM_01690 | chr14 | 73470524 | 73470931 | 0.033608 | 1        |
| 14 | 76108801 | 76117300 | BC052062 | chr14 | 76113506 | 76114041 | 0.063059 | 1        |
| 14 | 78393725 | 78402325 | NM_01070 | chr14 | 78398070 | 78399107 | 0.120684 | 1        |
| 14 | 87312825 | 87324675 | NM_17868 | chr14 | 87320712 | 87321241 | 0.044722 | 1        |
| 14 | 1.01E+08 | 1.01E+08 | AB033370 | chr14 | 1.01E+08 | 1.01E+08 | 0.091771 | 1        |
| 14 | 1.03E+08 | 1.03E+08 | NM_02604 | chr14 | 1.03E+08 | 1.03E+08 | 0.100305 | 1        |
| 14 | 1.08E+08 | 1.08E+08 | NM_19906 | chr14 | 1.08E+08 | 1.08E+08 | 0.076353 | 1        |
| 14 | 1.19E+08 | 1.19E+08 | BC075665 | chr14 | 1.19E+08 | 1.19E+08 | 0.074    | 1        |
| 14 | 1.21E+08 | 1.21E+08 | BC057692 | chr14 | 1.21E+08 | 1.21E+08 | 0.109765 | 1        |
| 14 | 1.21E+08 | 1.21E+08 | NM_18280 | chr14 | 1.21E+08 | 1.21E+08 | 0.107294 | 1        |
| 14 | 1.21E+08 | 1.21E+08 | NM_18303 | chr14 | 1.21E+08 | 1.21E+08 | 0.054736 | 1        |
| 14 | 1.21E+08 | 1.21E+08 | BC017635 | chr14 | 1.21E+08 | 1.21E+08 | 0.127647 | 1        |
| 14 | 1.22E+08 | 1.22E+08 | NM_17781 | chr14 | 1.22E+08 | 1.22E+08 | 0.098588 | 1        |
| 14 | 1.23E+08 | 1.23E+08 | NM_14546 | chr14 | 1.23E+08 | 1.23E+08 | 0.074169 | 1        |
| 15 | 4319491  | 4327990  | NM_17735 | chr15 | 4326125  | 4327242  | 0.131529 | 1        |
| 15 | 4671212  | 4679720  | NM_01670 | chr15 | 4676150  | 4676792  | 0.075567 | 1        |
| 15 | 6386548  | 6395047  | NM_01348 | chr15 | 6388133  | 6388764  | 0.074353 | 1        |
| 15 | 6818999  | 6828184  | NM_01101 | chr15 | 6819214  | 6819830  | 0.067167 | 1        |
| 15 | 8653524  | 8663945  | NM_14893 | chr15 | 8655103  | 8656007  | 0.086836 | 1        |
| 15 | 8653524  | 8663945  | NM_14893 | chr15 | 8659536  | 8660635  | 0.105546 | 1        |
| 15 | 10939446 | 10948024 | NM_05307 | chr15 | 10940238 | 10940923 | 0.079963 | 1        |
| 15 | 12260221 | 12268859 | NM_02567 | chr15 | 12264480 | 12265079 | 0.069453 | 1        |
| 15 | 12491578 | 12500077 | BC115886 | chr15 | 12491538 | 12492268 | 0.081294 | 0.94528  |
| 15 | 12513572 | 12522071 | BC085315 | chr15 | 12519880 | 12520734 | 0.100588 | 1        |
| 15 | 32115876 | 32124375 | NM_02050 | chr15 | 32123666 | 32124294 | 0.074    | 1        |
| 15 | 35234687 | 35243393 | NM_05404 | chr15 | 35236166 | 35236959 | 0.091191 | 1        |
| 15 | 36497658 | 36506162 | NM_02571 | chr15 | 36500901 | 36501454 | 0.065138 | 1        |
| 15 | 37171625 | 37180404 | NM_02649 | chr15 | 37174456 | 37175057 | 0.068565 | 1        |
| 15 | 37401426 | 37409932 | BC011162 | chr15 | 37408309 | 37409063 | 0.08875  | 1        |
| 15 | 38157792 | 38166291 | NM_00875 | chr15 | 38160711 | 38161587 | 0.103176 | 1        |
| 15 | 39684963 | 39693541 | NM_02272 | chr15 | 39687803 | 39688391 | 0.068656 | 1        |
| 15 | 44020307 | 44028823 | NM_01369 | chr15 | 44023226 | 44023865 | 0.075144 | 1        |
| 15 | 44020307 | 44028823 | NM_01369 | chr15 | 44026704 | 44027687 | 0.115534 | 1        |
| 15 | 44281627 | 44290126 | NM_13867 | chr15 | 44288957 | 44290026 | 0.125882 | 1        |
| 15 | 54747583 | 54756192 | NM_01574 | chr15 | 54754400 | 54755069 | 0.077817 | 1        |
| 15 | 58254074 | 58262573 | BC033609 | chr15 | 58255594 | 58256558 | 0.113529 | 1        |
| 15 | 58254074 | 58262573 | BC033609 | chr15 | 58260940 | 58261692 | 0.088588 | 1        |
| 15 | 58757893 | 58766392 | NM_02317 | chr15 | 58760018 | 58760719 | 0.082588 | 1        |
| 15 | 60748448 | 60758294 | DQ520794 | chr15 | 60748023 | 60748696 | 0.025287 | 0.369436 |
| 15 | 61809007 | 61817506 | NM_01084 | chr15 | 61811012 | 61811619 | 0.071529 | 1        |
| 15 | 65736227 | 65748070 | NM_01095 | chr15 | 65737327 | 65739359 | 0.171648 | 1        |

|    |          |          |          |       |          |          |          |   |
|----|----------|----------|----------|-------|----------|----------|----------|---|
| 15 | 66658999 | 66667498 | NM_00102 | chr15 | 66660203 | 66661340 | 0.133882 | 1 |
| 15 | 66658999 | 66667498 | NM_00102 | chr15 | 66662642 | 66663499 | 0.100941 | 1 |
| 15 | 72371036 | 72379535 | NM_00103 | chr15 | 72377069 | 72377827 | 0.089294 | 1 |
| 15 | 73430836 | 73439335 | BC056501 | chr15 | 73435810 | 73436410 | 0.070706 | 1 |
| 15 | 74530416 | 74550988 | NM_19860 | chr15 | 74540484 | 74541300 | 0.039712 | 1 |
| 15 | 74532218 | 74542552 | NM_00841 | chr15 | 74540484 | 74541300 | 0.079052 | 1 |
| 15 | 74552781 | 74567584 | NM_02051 | chr15 | 74563559 | 74564243 | 0.046271 | 1 |
| 15 | 74624289 | 74633223 | NM_02962 | chr15 | 74625290 | 74625999 | 0.079463 | 1 |
| 15 | 74624289 | 74633223 | NM_02962 | chr15 | 74632609 | 74633080 | 0.052826 | 1 |
| 15 | 74681074 | 74689573 | NM_00999 | chr15 | 74682121 | 74682767 | 0.076118 | 1 |
| 15 | 74808108 | 74816685 | NM_02049 | chr15 | 74810874 | 74811864 | 0.115528 | 1 |
| 15 | 74822372 | 74831159 | NM_01073 | chr15 | 74825612 | 74826256 | 0.073396 | 1 |
| 15 | 74873586 | 74882085 | NM_01074 | chr15 | 74876342 | 74877158 | 0.096118 | 1 |
| 15 | 75256585 | 75265084 | NM_00103 | chr15 | 75259111 | 75260265 | 0.135882 | 1 |
| 15 | 75417897 | 75426412 | NM_02673 | chr15 | 75420839 | 75421476 | 0.074918 | 1 |
| 15 | 75719237 | 75727736 | NM_17260 | chr15 | 75725153 | 75725626 | 0.055765 | 1 |
| 15 | 75790474 | 75798973 | BC026404 | chr15 | 75791606 | 75792284 | 0.079882 | 1 |
| 15 | 76742818 | 76758703 | NM_17281 | chr15 | 76746639 | 76747592 | 0.060053 | 1 |
| 15 | 76875424 | 76883925 | NM_01359 | chr15 | 76875724 | 76876400 | 0.079628 | 1 |
| 15 | 77298302 | 77306801 | NM_17774 | chr15 | 77302143 | 77302729 | 0.069059 | 1 |
| 15 | 77550327 | 77558826 | NM_17374 | chr15 | 77551053 | 77552179 | 0.132588 | 1 |
| 15 | 77550327 | 77558826 | NM_17374 | chr15 | 77557182 | 77557600 | 0.049294 | 1 |
| 15 | 78066089 | 78074746 | NM_00867 | chr15 | 78072501 | 78073091 | 0.068261 | 1 |
| 15 | 78220472 | 78229140 | BC107198 | chr15 | 78226558 | 78227161 | 0.069674 | 1 |
| 15 | 78418302 | 78426874 | NM_02819 | chr15 | 78426049 | 78426671 | 0.07267  | 1 |
| 15 | 79492123 | 79500622 | NM_17260 | chr15 | 79492284 | 79493380 | 0.129059 | 1 |
| 15 | 79629396 | 79637964 | NM_03068 | chr15 | 79637174 | 79637919 | 0.087058 | 1 |
| 15 | 79658978 | 79667588 | NM_02876 | chr15 | 79664471 | 79664957 | 0.056556 | 1 |
| 15 | 82096657 | 82105269 | NM_01188 | chr15 | 82101119 | 82101865 | 0.086729 | 1 |
| 15 | 82232437 | 82240946 | NM_01000 | chr15 | 82233731 | 82234825 | 0.128672 | 1 |
| 15 | 82274158 | 82285833 | NM_01000 | chr15 | 82281247 | 82282018 | 0.066119 | 1 |
| 15 | 82446174 | 82454673 | NM_14547 | chr15 | 82447685 | 82448652 | 0.113882 | 1 |
| 15 | 82467292 | 82475791 | NM_13369 | chr15 | 82471562 | 82472217 | 0.077177 | 1 |
| 15 | 82589389 | 82597949 | BC087906 | chr15 | 82591190 | 82591937 | 0.087373 | 1 |
| 15 | 82589389 | 82597949 | BC087906 | chr15 | 82592204 | 82593039 | 0.097652 | 1 |
| 15 | 82737401 | 82745900 | NM_01383 | chr15 | 82743448 | 82744065 | 0.072706 | 1 |
| 15 | 82921979 | 82930496 | NM_02347 | chr15 | 82925953 | 82926716 | 0.089692 | 1 |
| 15 | 82997457 | 83005974 | NM_02978 | chr15 | 82997650 | 82998374 | 0.085114 | 1 |
| 15 | 83773242 | 83781741 | BC056955 | chr15 | 83774637 | 83775655 | 0.119882 | 1 |
| 15 | 84146486 | 84155031 | NM_02232 | chr15 | 84147650 | 84148109 | 0.053826 | 1 |
| 15 | 84272326 | 84280863 | BC062953 | chr15 | 84276486 | 84277343 | 0.100492 | 1 |
| 15 | 84379517 | 84391589 | NM_17763 | chr15 | 84389298 | 84389675 | 0.03131  | 1 |
| 15 | 88779326 | 88788176 | NM_17281 | chr15 | 88784674 | 88785608 | 0.105638 | 1 |
| 15 | 88803820 | 88812773 | NM_13324 | chr15 | 88808199 | 88809268 | 0.1195   | 1 |
| 15 | 88807324 | 88815823 | NM_03126 | chr15 | 88808199 | 88809268 | 0.125882 | 1 |
| 15 | 89021742 | 89030258 | NM_02708 | chr15 | 89027174 | 89027737 | 0.066221 | 1 |
| 15 | 90589946 | 90598456 | BC055720 | chr15 | 90593169 | 90593755 | 0.06897  | 1 |

|    |          |          |          |       |          |          |          |          |
|----|----------|----------|----------|-------|----------|----------|----------|----------|
| 15 | 91660093 | 91668594 | NM_20724 | chr15 | 91663702 | 91664576 | 0.102917 | 1        |
| 15 | 96449632 | 96458204 | NM_13408 | chr15 | 96451987 | 96452428 | 0.051557 | 1        |
| 15 | 96856695 | 96865245 | AB055004 | chr15 | 96860233 | 96861060 | 0.096831 | 1        |
| 15 | 97183047 | 97191546 | BC038822 | chr15 | 97184777 | 97185427 | 0.076588 | 1        |
| 15 | 97183047 | 97191546 | BC038822 | chr15 | 97188622 | 97189309 | 0.080941 | 1        |
| 15 | 97206100 | 97214599 | BC086317 | chr15 | 97213790 | 97214484 | 0.081765 | 1        |
| 15 | 97786313 | 97794812 | NM_20135 | chr15 | 97786793 | 97787480 | 0.080941 | 1        |
| 15 | 97830149 | 97838691 | NM_03116 | chr15 | 97836384 | 97836985 | 0.070467 | 1        |
| 15 | 98204732 | 98213231 | NM_14703 | chr15 | 98208350 | 98208939 | 0.069412 | 1        |
| 15 | 98759922 | 98768458 | NM_01165 | chr15 | 98765000 | 98765619 | 0.072625 | 1        |
| 15 | 98989124 | 98997623 | BC023432 | chr15 | 98997077 | 98997574 | 0.058588 | 1        |
| 15 | 99477135 | 99485665 | NM_01202 | chr15 | 99483237 | 99483903 | 0.078185 | 1        |
| 15 | 99645607 | 99654106 | NM_02306 | chr15 | 99647742 | 99648333 | 0.069647 | 1        |
| 15 | 99976430 | 99984929 | NM_17281 | chr15 | 99983135 | 99983828 | 0.081647 | 1        |
| 15 | 1E+08    | 1E+08    | BC085139 | chr15 | 1E+08    | 1E+08    | 0.044535 | 1        |
| 15 | 1.01E+08 | 1.01E+08 | NM_02548 | chr15 | 1.01E+08 | 1.01E+08 | 0.04973  | 1        |
| 15 | 1.01E+08 | 1.01E+08 | NM_01066 | chr15 | 1.01E+08 | 1.01E+08 | 0.101529 | 1        |
| 15 | 1.01E+08 | 1.01E+08 | NM_05324 | chr15 | 1.01E+08 | 1.01E+08 | 0.099436 | 1        |
| 15 | 1.01E+08 | 1.01E+08 | NM_05324 | chr15 | 1.01E+08 | 1.01E+08 | 0.049013 | 1        |
| 15 | 1.01E+08 | 1.01E+08 | NM_17771 | chr15 | 1.01E+08 | 1.01E+08 | 0.098232 | 1        |
| 15 | 1.02E+08 | 1.02E+08 | NM_00847 | chr15 | 1.02E+08 | 1.02E+08 | 0.076471 | 1        |
| 15 | 1.02E+08 | 1.02E+08 | NM_00100 | chr15 | 1.02E+08 | 1.02E+08 | 0.092941 | 1        |
| 15 | 1.02E+08 | 1.02E+08 | NM_21372 | chr15 | 1.02E+08 | 1.02E+08 | 0.069059 | 1        |
| 15 | 1.02E+08 | 1.02E+08 | NM_00100 | chr15 | 1.02E+08 | 1.02E+08 | 0.11     | 1        |
| 15 | 1.02E+08 | 1.02E+08 | NM_00100 | chr15 | 1.02E+08 | 1.02E+08 | 0.070706 | 1        |
| 15 | 1.02E+08 | 1.02E+08 | NM_13045 | chr15 | 1.02E+08 | 1.02E+08 | 0.117018 | 1        |
| 15 | 1.02E+08 | 1.02E+08 | NM_00958 | chr15 | 1.02E+08 | 1.02E+08 | 0.021249 | 1        |
| 15 | 1.03E+08 | 1.03E+08 | NM_17763 | chr15 | 1.03E+08 | 1.03E+08 | 0.069529 | 1        |
| 15 | 1.03E+08 | 1.03E+08 | NM_15350 | chr15 | 1.03E+08 | 1.03E+08 | 0.069147 | 1        |
| 15 | 1.03E+08 | 1.03E+08 | NM_00813 | chr15 | 1.03E+08 | 1.03E+08 | 0.079883 | 1        |
| 16 | 3653331  | 3662020  | NM_14892 | chr16 | 3656557  | 3657186  | 0.072497 | 1        |
| 16 | 4631788  | 4640340  | NM_02639 | chr16 | 4639176  | 4640041  | 0.101251 | 1        |
| 16 | 4635617  | 4644116  | BC002011 | chr16 | 4639176  | 4640041  | 0.101882 | 1        |
| 16 | 6948489  | 6956988  | AF107204 | chr16 | 6949901  | 6950510  | 0.071765 | 1        |
| 16 | 10968523 | 10988129 | NM_00922 | chr16 | 10981195 | 10982023 | 0.042281 | 1        |
| 16 | 11313226 | 11321725 | NM_02896 | chr16 | 11313241 | 11315207 | 0.231412 | 1        |
| 16 | 13688277 | 13696776 | NM_00103 | chr16 | 13690934 | 13691549 | 0.072471 | 1        |
| 16 | 13894184 | 13902735 | NM_14451 | chr16 | 13899235 | 13900224 | 0.115762 | 1        |
| 16 | 13894996 | 13904199 | NM_02896 | chr16 | 13899235 | 13900224 | 0.107562 | 1        |
| 16 | 14067204 | 14085552 | NM_02331 | chr16 | 14081008 | 14081603 | 0.032481 | 1        |
| 16 | 15548385 | 15556936 | NM_00856 | chr16 | 15548306 | 15548945 | 0.065599 | 0.876562 |
| 16 | 16471213 | 16479759 | NM_13923 | chr16 | 16471881 | 16472662 | 0.091494 | 1        |
| 16 | 16773610 | 16788813 | NM_01698 | chr16 | 16778299 | 16778937 | 0.042028 | 1        |
| 16 | 16778454 | 16793916 | NM_01162 | chr16 | 16778299 | 16778937 | 0.031301 | 0.757433 |
| 16 | 16778454 | 16793916 | NM_01162 | chr16 | 16791071 | 16792171 | 0.071202 | 1        |
| 16 | 17667234 | 17678870 | NM_14547 | chr16 | 17678598 | 17679279 | 0.02346  | 0.400293 |
| 16 | 17801766 | 17814776 | NM_00943 | chr16 | 17810719 | 17811344 | 0.048113 | 1        |

|    |          |          |          |       |          |          |          |          |
|----|----------|----------|----------|-------|----------|----------|----------|----------|
| 16 | 17802687 | 17811234 | NM_01004 | chr16 | 17810719 | 17811344 | 0.060365 | 0.824281 |
| 16 | 19441982 | 19450481 | NM_14635 | chr16 | 19441971 | 19442462 | 0.056588 | 0.977642 |
| 16 | 19441982 | 19450481 | NM_14635 | chr16 | 19449491 | 19450092 | 0.070824 | 1        |
| 16 | 19517730 | 19526229 | NM_14695 | chr16 | 19522868 | 19523862 | 0.117059 | 1        |
| 16 | 19536165 | 19544664 | NM_14695 | chr16 | 19543973 | 19544634 | 0.077882 | 1        |
| 16 | 19667797 | 19677116 | NM_05405 | chr16 | 19670085 | 19670754 | 0.071888 | 1        |
| 16 | 20213406 | 20221905 | NM_00100 | chr16 | 20216848 | 20217600 | 0.088588 | 1        |
| 16 | 22535049 | 22543548 | NM_13865 | chr16 | 22537255 | 22538084 | 0.097647 | 1        |
| 16 | 22535049 | 22543548 | NM_13865 | chr16 | 22538420 | 22539363 | 0.111059 | 1        |
| 16 | 23055870 | 23064445 | NM_00960 | chr16 | 23061583 | 23062554 | 0.11334  | 1        |
| 16 | 23338467 | 23346966 | NM_00100 | chr16 | 23345352 | 23345973 | 0.073177 | 1        |
| 16 | 23433438 | 23441937 | NM_00855 | chr16 | 23438723 | 23439415 | 0.081529 | 1        |
| 16 | 24592996 | 24601495 | BC005613 | chr16 | 24593953 | 24594544 | 0.069647 | 1        |
| 16 | 24592996 | 24601495 | BC005613 | chr16 | 24597933 | 24598751 | 0.096353 | 1        |
| 16 | 26902708 | 26911207 | NM_00101 | chr16 | 26904164 | 26904755 | 0.069647 | 1        |
| 16 | 26902708 | 26911207 | NM_00101 | chr16 | 26905160 | 26905771 | 0.072    | 1        |
| 16 | 29295915 | 29304479 | NM_17565 | chr16 | 29295990 | 29297040 | 0.122709 | 1        |
| 16 | 32714656 | 32723181 | NM_14607 | chr16 | 32714817 | 32715401 | 0.068614 | 1        |
| 16 | 32970235 | 32984767 | NM_17282 | chr16 | 32978480 | 32979081 | 0.041423 | 1        |
| 16 | 32970944 | 32979443 | NM_17837 | chr16 | 32978480 | 32979081 | 0.070824 | 1        |
| 16 | 33432085 | 33440841 | NM_13425 | chr16 | 33432204 | 33432680 | 0.054471 | 1        |
| 16 | 33639203 | 33647702 | NM_17525 | chr16 | 33645906 | 33646782 | 0.103176 | 1        |
| 16 | 43806477 | 43815008 | NM_02912 | chr16 | 43813758 | 43814173 | 0.048758 | 1        |
| 16 | 45742934 | 45751433 | BC060683 | chr16 | 45749804 | 45750605 | 0.094353 | 1        |
| 16 | 48344863 | 48353431 | NM_01081 | chr16 | 48350418 | 48351453 | 0.120901 | 1        |
| 16 | 56993804 | 57002303 | NM_18328 | chr16 | 56995919 | 56996734 | 0.096    | 1        |
| 16 | 56993804 | 57002303 | NM_18328 | chr16 | 56998086 | 56998843 | 0.089177 | 1        |
| 16 | 58658768 | 58667267 | BC119518 | chr16 | 58659344 | 58660213 | 0.102353 | 1        |
| 16 | 58737669 | 58746168 | NM_14700 | chr16 | 58740983 | 58741519 | 0.063177 | 1        |
| 16 | 59224252 | 59232751 | NM_14699 | chr16 | 59227842 | 59228481 | 0.075294 | 1        |
| 16 | 59301973 | 59310472 | NM_00101 | chr16 | 59305923 | 59306534 | 0.072    | 1        |
| 16 | 62786754 | 62795253 | NM_02657 | chr16 | 62793576 | 62794332 | 0.089059 | 1        |
| 16 | 62790590 | 62799123 | NM_01117 | chr16 | 62793576 | 62794332 | 0.088704 | 1        |
| 16 | 63803838 | 63812360 | NM_01014 | chr16 | 63810181 | 63810648 | 0.05491  | 1        |
| 16 | 65478458 | 65486986 | NM_02687 | chr16 | 65481826 | 65482442 | 0.072341 | 1        |
| 16 | 75789405 | 75797946 | NM_02338 | chr16 | 75797334 | 75797920 | 0.068719 | 1        |
| 16 | 78807540 | 78816368 | NM_13913 | chr16 | 78814114 | 78814792 | 0.076906 | 1        |
| 16 | 87436526 | 87445251 | NM_14485 | chr16 | 87442955 | 87443803 | 0.097295 | 1        |
| 16 | 88711868 | 88720368 | NM_01371 | chr16 | 88714393 | 88715238 | 0.099518 | 1        |
| 16 | 88712478 | 88720993 | NM_01370 | chr16 | 88714393 | 88715238 | 0.099342 | 1        |
| 16 | 88755770 | 88779948 | NM_13087 | chr16 | 88757655 | 88758517 | 0.035692 | 1        |
| 16 | 88755770 | 88779948 | NM_13087 | chr16 | 88762458 | 88763376 | 0.038008 | 1        |
| 16 | 88755770 | 88779948 | NM_13087 | chr16 | 88765996 | 88766669 | 0.027875 | 1        |
| 16 | 88782809 | 88791309 | NM_01067 | chr16 | 88790166 | 88791215 | 0.123515 | 1        |
| 16 | 88810577 | 88827123 | NM_13335 | chr16 | 88823114 | 88824015 | 0.054511 | 1        |
| 16 | 89290128 | 89298663 | NM_02862 | chr16 | 89296497 | 89297377 | 0.10321  | 1        |
| 16 | 89847187 | 89855686 | NM_00938 | chr16 | 89851726 | 89853301 | 0.185412 | 1        |

|    |          |          |          |       |          |          |          |          |
|----|----------|----------|----------|-------|----------|----------|----------|----------|
| 16 | 89847187 | 89855686 | NM_00938 | chr16 | 89854449 | 89855462 | 0.119294 | 1        |
| 16 | 90621183 | 90629910 | NM_02984 | chr16 | 90626535 | 90627154 | 0.071036 | 1        |
| 16 | 90942877 | 90951376 | BC032975 | chr16 | 90942885 | 90943474 | 0.069412 | 1        |
| 16 | 91152628 | 91161168 | NM_01696 | chr16 | 91153202 | 91154011 | 0.094837 | 1        |
| 16 | 91529500 | 91541831 | NM_01025 | chr16 | 91530320 | 91531254 | 0.075819 | 1        |
| 16 | 91529500 | 91541831 | NM_01025 | chr16 | 91540845 | 91541450 | 0.04914  | 1        |
| 16 | 92344818 | 92360984 | AY325904 | chr16 | 92345277 | 92346371 | 0.067731 | 1        |
| 16 | 93894878 | 93903377 | NM_01950 | chr16 | 93894874 | 93896097 | 0.143529 | 0.996732 |
| 16 | 94714258 | 94722757 | NM_00789 | chr16 | 94721299 | 94722030 | 0.086118 | 1        |
| 16 | 97952217 | 97960717 | BC046433 | chr16 | 97952349 | 97952947 | 0.070462 | 1        |
| 17 | 5394226  | 5402741  | NM_02745 | chr17 | 5397646  | 5398338  | 0.081376 | 1        |
| 17 | 8172580  | 8181079  | NM_17877 | chr17 | 8179504  | 8180121  | 0.072706 | 1        |
| 17 | 8228803  | 8237302  | NM_01368 | chr17 | 8235451  | 8236506  | 0.124235 | 1        |
| 17 | 8682159  | 8690658  | AF110507 | chr17 | 8686799  | 8687789  | 0.116588 | 1        |
| 17 | 9510532  | 9519053  | NM_02622 | chr17 | 9513098  | 9513711  | 0.072049 | 1        |
| 17 | 13141000 | 13149499 | BC061173 | chr17 | 13140997 | 13142259 | 0.148235 | 0.997625 |
| 17 | 13141000 | 13149499 | BC061173 | chr17 | 13145022 | 13146119 | 0.129176 | 1        |
| 17 | 13937857 | 13946691 | NM_17282 | chr17 | 13945666 | 13946340 | 0.076401 | 1        |
| 17 | 17586058 | 17594557 | NM_01352 | chr17 | 17589645 | 17590326 | 0.080235 | 1        |
| 17 | 17586442 | 17599850 | NM_00803 | chr17 | 17589645 | 17590326 | 0.050861 | 1        |
| 17 | 20927523 | 20936022 | NM_13419 | chr17 | 20928078 | 20929222 | 0.134706 | 1        |
| 17 | 21355904 | 21364403 | BC064464 | chr17 | 21361835 | 21362770 | 0.110118 | 1        |
| 17 | 22569305 | 22577816 | BC078460 | chr17 | 22576016 | 22576615 | 0.070489 | 1        |
| 17 | 23723206 | 23731720 | NM_13373 | chr17 | 23723879 | 23724465 | 0.068937 | 1        |
| 17 | 23976426 | 23984947 | NM_00763 | chr17 | 23983445 | 23984489 | 0.122624 | 1        |
| 17 | 24210383 | 24218882 | NM_02793 | chr17 | 24217222 | 24218120 | 0.105765 | 1        |
| 17 | 24840829 | 24849375 | NM_02788 | chr17 | 24846898 | 24847713 | 0.095472 | 1        |
| 17 | 24842377 | 24850876 | BC107381 | chr17 | 24846898 | 24847713 | 0.096    | 1        |
| 17 | 24876047 | 24884546 | BC005749 | chr17 | 24879995 | 24880791 | 0.093765 | 1        |
| 17 | 25070480 | 25079127 | NM_03118 | chr17 | 25075361 | 25075825 | 0.05377  | 1        |
| 17 | 25300787 | 25309288 | NM_02962 | chr17 | 25306665 | 25307499 | 0.098212 | 1        |
| 17 | 27453979 | 27462540 | NM_01389 | chr17 | 27454460 | 27455090 | 0.073698 | 1        |
| 17 | 27911409 | 27919908 | BC058346 | chr17 | 27917848 | 27918511 | 0.078118 | 1        |
| 17 | 28211167 | 28219738 | NM_01022 | chr17 | 28213340 | 28213987 | 0.075595 | 1        |
| 17 | 32546285 | 32554784 | NM_18317 | chr17 | 32553862 | 32554500 | 0.075177 | 1        |
| 17 | 32802267 | 32810766 | NM_00100 | chr17 | 32804010 | 32805070 | 0.124824 | 1        |
| 17 | 33605710 | 33616743 | NM_01990 | chr17 | 33607251 | 33607991 | 0.067156 | 1        |
| 17 | 33802583 | 33817290 | NM_01153 | chr17 | 33812102 | 33812809 | 0.048137 | 1        |
| 17 | 33865432 | 33873967 | NM_20710 | chr17 | 33868249 | 33868876 | 0.073571 | 1        |
| 17 | 33949727 | 33958226 | NM_01038 | chr17 | 33950988 | 33951663 | 0.079529 | 1        |
| 17 | 33978867 | 33987366 | NM_20140 | chr17 | 33985221 | 33986342 | 0.132    | 1        |
| 17 | 34231742 | 34241185 | NM_03089 | chr17 | 34233481 | 34234226 | 0.078992 | 1        |
| 17 | 34232654 | 34241402 | NM_01944 | chr17 | 34233481 | 34234226 | 0.085267 | 1        |
| 17 | 35135293 | 35143821 | NM_02057 | chr17 | 35137071 | 35137679 | 0.071403 | 1        |
| 17 | 35795703 | 35804204 | NM_00820 | chr17 | 35799007 | 35799547 | 0.063632 | 1        |
| 17 | 36149128 | 36157627 | NM_17763 | chr17 | 36150785 | 36151374 | 0.069412 | 1        |
| 17 | 36691790 | 36707925 | NM_18271 | chr17 | 36706837 | 36707590 | 0.046728 | 1        |

|    |          |          |          |       |          |          |          |          |
|----|----------|----------|----------|-------|----------|----------|----------|----------|
| 17 | 37505601 | 37514100 | NM_14637 | chr17 | 37510072 | 37510663 | 0.069647 | 1        |
| 17 | 37661145 | 37669644 | NM_14632 | chr17 | 37668469 | 37669448 | 0.115294 | 1        |
| 17 | 37669226 | 37677725 | NM_14648 | chr17 | 37668469 | 37669448 | 0.026235 | 0.227551 |
| 17 | 42153269 | 42161768 | BC089564 | chr17 | 42154267 | 42155159 | 0.105059 | 1        |
| 17 | 42153269 | 42161768 | BC089564 | chr17 | 42157638 | 42158208 | 0.067177 | 1        |
| 17 | 43258906 | 43269564 | NM_20764 | chr17 | 43267162 | 43268111 | 0.089127 | 1        |
| 17 | 44973199 | 44981698 | BC110699 | chr17 | 44977315 | 44977913 | 0.070471 | 1        |
| 17 | 46212892 | 46221392 | NM_02806 | chr17 | 46219388 | 46219992 | 0.071168 | 1        |
| 17 | 52938163 | 52946919 | NM_02588 | chr17 | 52943012 | 52943611 | 0.068517 | 1        |
| 17 | 56143625 | 56152191 | NM_01148 | chr17 | 56150705 | 56151332 | 0.073305 | 1        |
| 17 | 56554627 | 56563256 | BC116283 | chr17 | 56557455 | 56558106 | 0.07555  | 1        |
| 17 | 56557072 | 56565571 | NM_00103 | chr17 | 56557455 | 56558106 | 0.076706 | 1        |
| 17 | 68172772 | 68181271 | NM_17727 | chr17 | 68174690 | 68175307 | 0.072706 | 1        |
| 17 | 71612129 | 71620628 | NM_17708 | chr17 | 71618884 | 71619487 | 0.071059 | 1        |
| 17 | 71680804 | 71689303 | NM_03017 | chr17 | 71685607 | 71686564 | 0.112706 | 1        |
| 17 | 73703746 | 73712478 | NM_02057 | chr17 | 73707343 | 73708279 | 0.107294 | 1        |
| 17 | 79770563 | 79779062 | BC055466 | chr17 | 79772832 | 79773566 | 0.086471 | 1        |
| 17 | 80932974 | 80941473 | BC065413 | chr17 | 80934004 | 80934885 | 0.103765 | 1        |
| 17 | 86070111 | 86079415 | NM_01110 | chr17 | 86077284 | 86078066 | 0.084148 | 1        |
| 17 | 87010005 | 87018504 | NM_01965 | chr17 | 87012217 | 87012855 | 0.075177 | 1        |
| 17 | 88571003 | 88582018 | NM_02363 | chr17 | 88578892 | 88579548 | 0.059641 | 1        |
| 18 | 3377029  | 3385821  | NM_02940 | chr18 | 3382819  | 3383526  | 0.080519 | 1        |
| 18 | 7002255  | 7010754  | NM_17759 | chr18 | 7006619  | 7007249  | 0.074235 | 1        |
| 18 | 9616967  | 9625493  | NM_00759 | chr18 | 9624944  | 9625439  | 0.058168 | 1        |
| 18 | 11046506 | 11056992 | NM_01025 | chr18 | 11049972 | 11050628 | 0.062649 | 1        |
| 18 | 12377395 | 12385922 | NM_00872 | chr18 | 12384251 | 12385324 | 0.125938 | 1        |
| 18 | 13144159 | 13152659 | NM_15308 | chr18 | 13152221 | 13152600 | 0.044701 | 1        |
| 18 | 13985079 | 13993578 | NM_18132 | chr18 | 13987984 | 13988695 | 0.083765 | 1        |
| 18 | 20384350 | 20392849 | NM_18168 | chr18 | 20390568 | 20391271 | 0.082824 | 1        |
| 18 | 20513739 | 20522344 | NM_18168 | chr18 | 20520020 | 20520607 | 0.068324 | 1        |
| 18 | 20573185 | 20581684 | NM_18156 | chr18 | 20574380 | 20575344 | 0.113529 | 1        |
| 18 | 20695117 | 20703755 | NM_00788 | chr18 | 20697413 | 20698007 | 0.068874 | 1        |
| 18 | 32989941 | 33000288 | BC021497 | chr18 | 32991492 | 32992313 | 0.079436 | 1        |
| 18 | 33076170 | 33084867 | NM_00979 | chr18 | 33081980 | 33082603 | 0.071741 | 1        |
| 18 | 35826581 | 35835095 | NM_02966 | chr18 | 35831874 | 35832643 | 0.090429 | 1        |
| 18 | 35890292 | 35900080 | NM_01991 | chr18 | 35893842 | 35894408 | 0.057922 | 1        |
| 18 | 36792246 | 36802269 | NM_02529 | chr18 | 36798328 | 36800113 | 0.178172 | 1        |
| 18 | 36799566 | 36810068 | NM_02640 | chr18 | 36798328 | 36800113 | 0.052176 | 0.306831 |
| 18 | 37384972 | 37393471 | NM_05312 | chr18 | 37390849 | 37391510 | 0.077882 | 1        |
| 18 | 37454002 | 37470213 | NM_05313 | chr18 | 37462449 | 37463613 | 0.07186  | 1        |
| 18 | 37633626 | 37646832 | NM_05314 | chr18 | 37640098 | 37641425 | 0.100553 | 1        |
| 18 | 37794309 | 37822874 | NM_03358 | chr18 | 37815035 | 37815798 | 0.026745 | 1        |
| 18 | 37935053 | 37948127 | NM_03358 | chr18 | 37945752 | 37946353 | 0.046042 | 1        |
| 18 | 39893471 | 39901991 | NM_01103 | chr18 | 39899935 | 39901076 | 0.134022 | 1        |
| 18 | 40342803 | 40351373 | NM_02331 | chr18 | 40347391 | 40348000 | 0.07117  | 1        |
| 18 | 42353501 | 42362000 | BC006060 | chr18 | 42359375 | 42360135 | 0.089529 | 1        |
| 18 | 42419094 | 42427593 | BC054080 | chr18 | 42425499 | 42426115 | 0.072588 | 1        |

|    |          |          |          |       |          |          |          |          |
|----|----------|----------|----------|-------|----------|----------|----------|----------|
| 18 | 42514616 | 42523115 | NM_13894 | chr18 | 42522676 | 42523098 | 0.049765 | 1        |
| 18 | 42703106 | 42711625 | NM_18154 | chr18 | 42705930 | 42706481 | 0.064789 | 1        |
| 18 | 42703106 | 42711625 | NM_18154 | chr18 | 42709696 | 42710289 | 0.069718 | 1        |
| 18 | 43022463 | 43030962 | NM_02753 | chr18 | 43027316 | 43028141 | 0.097177 | 1        |
| 18 | 43182241 | 43190802 | NM_02839 | chr18 | 43182853 | 43184071 | 0.142373 | 1        |
| 18 | 46969370 | 46977878 | BC113158 | chr18 | 46976281 | 46976896 | 0.072394 | 1        |
| 18 | 48164666 | 48174573 | NM_00102 | chr18 | 48173235 | 48173942 | 0.071457 | 1        |
| 18 | 50397699 | 50406198 | NM_00100 | chr18 | 50405269 | 50406151 | 0.103882 | 1        |
| 18 | 50691362 | 50699873 | NM_02610 | chr18 | 50693644 | 50694246 | 0.070841 | 1        |
| 18 | 52765585 | 52774088 | NM_03009 | chr18 | 52767587 | 52768204 | 0.072672 | 1        |
| 18 | 52765585 | 52774088 | NM_03009 | chr18 | 52769236 | 52770033 | 0.093838 | 1        |
| 18 | 59181878 | 59190401 | NM_17375 | chr18 | 59188735 | 59189698 | 0.113092 | 1        |
| 18 | 61158918 | 61167568 | NM_00988 | chr18 | 61159620 | 61160221 | 0.069587 | 1        |
| 18 | 61282675 | 61291174 | BC066029 | chr18 | 61283384 | 61284019 | 0.074824 | 1        |
| 18 | 65143263 | 65151774 | NM_03188 | chr18 | 65143266 | 65143882 | 0.072486 | 1        |
| 18 | 65589707 | 65598206 | BC046536 | chr18 | 65596376 | 65596990 | 0.072353 | 1        |
| 18 | 67324792 | 67333291 | NM_02419 | chr18 | 67326897 | 67327615 | 0.084588 | 1        |
| 18 | 76380486 | 76390302 | BC089184 | chr18 | 76385054 | 76385673 | 0.063156 | 1        |
| 18 | 78338711 | 78347210 | AF367359 | chr18 | 78344333 | 78345127 | 0.093529 | 1        |
| 18 | 79246519 | 79255018 | NM_05309 | chr18 | 79249345 | 79249990 | 0.076    | 1        |
| 18 | 79246519 | 79255018 | NM_05309 | chr18 | 79253610 | 79254465 | 0.100706 | 1        |
| 18 | 82538706 | 82547205 | NM_00808 | chr18 | 82546022 | 82546627 | 0.071294 | 1        |
| 18 | 82682891 | 82691473 | NM_00102 | chr18 | 82686166 | 82686984 | 0.095421 | 1        |
| 18 | 82682891 | 82691473 | NM_00102 | chr18 | 82690587 | 82691359 | 0.090062 | 1        |
| 18 | 86839303 | 86849740 | NM_17263 | chr18 | 86843554 | 86844651 | 0.105193 | 1        |
| 18 | 89018975 | 89034409 | NM_01882 | chr18 | 89027740 | 89028531 | 0.051312 | 1        |
| 18 | 89325620 | 89334287 | NM_17868 | chr18 | 89332129 | 89333544 | 0.163359 | 1        |
| 19 | 4303456  | 4312014  | NM_13086 | chr19 | 4303742  | 4304333  | 0.069167 | 1        |
| 19 | 4588361  | 4596860  | NM_00879 | chr19 | 4590366  | 4591360  | 0.117059 | 1        |
| 19 | 4987367  | 4995971  | NM_15355 | chr19 | 4993379  | 4993967  | 0.068449 | 1        |
| 19 | 5017860  | 5028605  | NM_00785 | chr19 | 5026237  | 5026681  | 0.041411 | 1        |
| 19 | 5595873  | 5604374  | NM_02661 | chr19 | 5600198  | 5600801  | 0.071042 | 1        |
| 19 | 8196528  | 8205027  | NM_00101 | chr19 | 8197069  | 8198012  | 0.111059 | 1        |
| 19 | 10043748 | 10052311 | NM_01023 | chr19 | 10045767 | 10046730 | 0.112564 | 1        |
| 19 | 10079273 | 10087807 | NM_14453 | chr19 | 10084097 | 10084741 | 0.075571 | 1        |
| 19 | 10102593 | 10111209 | NM_02189 | chr19 | 10103921 | 10104596 | 0.07845  | 1        |
| 19 | 10742575 | 10751116 | NM_02145 | chr19 | 10750803 | 10751438 | 0.03676  | 0.493711 |
| 19 | 10749860 | 10758359 | NM_18140 | chr19 | 10750803 | 10751438 | 0.074824 | 1        |
| 19 | 11688189 | 11696688 | NM_01351 | chr19 | 11689827 | 11690966 | 0.134118 | 1        |
| 19 | 11755576 | 11764101 | NM_13335 | chr19 | 11764048 | 11765025 | 0.006334 | 0.055215 |
| 19 | 11756086 | 11766599 | NM_00103 | chr19 | 11764048 | 11765025 | 0.093019 | 1        |
| 19 | 11756086 | 11766599 | NM_00103 | chr19 | 11765295 | 11766135 | 0.079989 | 1        |
| 19 | 11808604 | 11817117 | NM_00811 | chr19 | 11815547 | 11816193 | 0.075993 | 1        |
| 19 | 11893570 | 11902069 | NM_14693 | chr19 | 11895189 | 11895928 | 0.087059 | 1        |
| 19 | 12156393 | 12172682 | NM_14680 | chr19 | 12165535 | 12166547 | 0.062185 | 1        |
| 19 | 12483356 | 12497481 | NM_01954 | chr19 | 12485241 | 12486033 | 0.056138 | 1        |
| 19 | 12944902 | 12953401 | NM_14669 | chr19 | 12945646 | 12946293 | 0.076235 | 1        |



|    |          |          |          |       |          |          |          |   |
|----|----------|----------|----------|-------|----------|----------|----------|---|
| 19 | 13160166 | 13176303 | NM_14657 | chr19 | 13163533 | 13164254 | 0.044739 | 1 |
| 19 | 13646325 | 13654824 | NM_14629 | chr19 | 13652750 | 13653650 | 0.106    | 1 |
| 19 | 13765848 | 13774347 | NM_14634 | chr19 | 13767596 | 13768196 | 0.070706 | 1 |
| 19 | 13829326 | 13837825 | NM_14634 | chr19 | 13830706 | 13831530 | 0.097059 | 1 |
| 19 | 13880108 | 13888607 | NM_14679 | chr19 | 13882871 | 13883483 | 0.072118 | 1 |
| 19 | 13892914 | 13901413 | NM_00101 | chr19 | 13897247 | 13897855 | 0.071647 | 1 |
| 19 | 15974232 | 15982731 | BC005657 | chr19 | 15981397 | 15982210 | 0.095765 | 1 |
| 19 | 16938230 | 16946849 | NM_00802 | chr19 | 16945296 | 16946450 | 0.133991 | 1 |
| 19 | 21741733 | 21750232 | BC032261 | chr19 | 21744362 | 21745152 | 0.093059 | 1 |
| 19 | 24238586 | 24247145 | AF113005 | chr19 | 24243864 | 24244458 | 0.069509 | 1 |
| 19 | 25470405 | 25479215 | BC079563 | chr19 | 25472482 | 25473098 | 0.070026 | 1 |
| 19 | 25733508 | 25747302 | NM_14583 | chr19 | 25741942 | 25742792 | 0.061689 | 1 |
| 19 | 26666257 | 26674756 | NM_01141 | chr19 | 26667931 | 26668550 | 0.072941 | 1 |
| 19 | 27278117 | 27287192 | NM_01370 | chr19 | 27282398 | 27283272 | 0.096408 | 1 |
| 19 | 28603918 | 28612417 | AY220846 | chr19 | 28604132 | 28605013 | 0.103765 | 1 |
| 19 | 29023917 | 29032449 | NM_02892 | chr19 | 29026664 | 29027247 | 0.06844  | 1 |
| 19 | 29023917 | 29032449 | NM_02892 | chr19 | 29028050 | 29028761 | 0.083441 | 1 |
| 19 | 29687156 | 29695655 | BC031519 | chr19 | 29688149 | 29688698 | 0.064706 | 1 |
| 19 | 29687156 | 29695655 | BC031519 | chr19 | 29692029 | 29692770 | 0.087294 | 1 |
| 19 | 30063787 | 30072286 | NM_02574 | chr19 | 30069492 | 30070323 | 0.097882 | 1 |
| 19 | 30292939 | 30301453 | NM_01077 | chr19 | 30293844 | 30294587 | 0.087375 | 1 |
| 19 | 33455623 | 33464122 | BC052355 | chr19 | 33461749 | 33462532 | 0.092235 | 1 |
| 19 | 34160965 | 34169469 | BC031933 | chr19 | 34164438 | 34165178 | 0.087125 | 1 |
| 19 | 34229401 | 34238038 | NM_02420 | chr19 | 34231397 | 34232052 | 0.075944 | 1 |
| 19 | 34610943 | 34619442 | NM_00833 | chr19 | 34611850 | 34612716 | 0.102    | 1 |
| 19 | 34630312 | 34638811 | U43085   | chr19 | 34634493 | 34634927 | 0.051177 | 1 |
| 19 | 34810609 | 34819108 | NM_17283 | chr19 | 34814818 | 34815462 | 0.075882 | 1 |
| 19 | 38583341 | 38591840 | NM_01958 | chr19 | 38585568 | 38586271 | 0.082824 | 1 |
| 19 | 40238072 | 40246597 | NM_14549 | chr19 | 40238934 | 40239540 | 0.071194 | 1 |
| 19 | 40878590 | 40887118 | NM_17283 | chr19 | 40879590 | 40880696 | 0.129792 | 1 |
| 19 | 40878590 | 40887118 | NM_17283 | chr19 | 40882492 | 40883143 | 0.076445 | 1 |
| 19 | 42294885 | 42311593 | NM_02769 | chr19 | 42298920 | 42299776 | 0.05129  | 1 |
| 19 | 44250599 | 44259200 | NM_02445 | chr19 | 44256464 | 44257155 | 0.080446 | 1 |
| 19 | 46904211 | 46912710 | BC052513 | chr19 | 46910963 | 46911623 | 0.077765 | 1 |
| 19 | 47062009 | 47070512 | NM_14610 | chr19 | 47062161 | 47062753 | 0.069732 | 1 |
| 19 | 47115059 | 47123558 | NM_17734 | chr19 | 47115265 | 47115737 | 0.055647 | 1 |
| 19 | 47138077 | 47146589 | NM_01105 | chr19 | 47139268 | 47140367 | 0.129214 | 1 |
| 19 | 47175600 | 47184586 | BC051231 | chr19 | 47180675 | 47181308 | 0.070546 | 1 |
| 19 | 50729297 | 50737796 | NM_02137 | chr19 | 50734812 | 50735426 | 0.072353 | 1 |
| 19 | 54034764 | 54043263 | BC049775 | chr19 | 54042417 | 54043094 | 0.079765 | 1 |
| 19 | 55150198 | 55158697 | NM_00814 | chr19 | 55155292 | 55156014 | 0.085059 | 1 |
| 19 | 56335173 | 56343687 | NM_14610 | chr19 | 56340079 | 56340682 | 0.070934 | 1 |
| 19 | 56444379 | 56460164 | NM_00761 | chr19 | 56457074 | 56457735 | 0.041936 | 1 |
| 19 | 56921666 | 56930216 | NM_17284 | chr19 | 56929438 | 56930140 | 0.082213 | 1 |
| 19 | 57058928 | 57067478 | NM_14610 | chr19 | 57059218 | 57059854 | 0.074494 | 1 |
| 19 | 57169745 | 57178244 | AF404776 | chr19 | 57170085 | 57170690 | 0.071294 | 1 |
| 19 | 57700223 | 57708722 | BC050020 | chr19 | 57704346 | 57704959 | 0.072235 | 1 |

|           |          |          |                    |          |          |          |   |
|-----------|----------|----------|--------------------|----------|----------|----------|---|
| 19        | 58776137 | 58784724 | NM_01887 chr19     | 58777184 | 58777957 | 0.090126 | 1 |
| 19        | 60278660 | 60287360 | NM_02964 chr19     | 60285983 | 60286824 | 0.096771 | 1 |
| Un_random | 821754   | 830253   | NM_00100 chrUn_ran | 825952   | 826548   | 0.070235 | 1 |
| X         | 6974802  | 6983301  | NM_00842 chrX      | 6980426  | 6981042  | 0.072588 | 1 |
| X         | 7029265  | 7043783  | NM_14573 chrX      | 7031827  | 7032412  | 0.040361 | 1 |
| X         | 8141132  | 8149631  | BC104363 chrX      | 8141283  | 8142392  | 0.130588 | 1 |
| X         | 8184444  | 8192951  | NM_03126 chrX      | 8192011  | 8192607  | 0.070169 | 1 |
| X         | 10450183 | 10484020 | BC049545 chrX      | 10459293 | 10460347 | 0.031178 | 1 |
| X         | 10450183 | 10484020 | BC049545 chrX      | 10462066 | 10463513 | 0.042792 | 1 |
| X         | 10450183 | 10484020 | BC049545 chrX      | 10472639 | 10473016 | 0.011171 | 1 |
| X         | 10450183 | 10484020 | BC049545 chrX      | 10475129 | 10476183 | 0.031178 | 1 |
| X         | 10450183 | 10484020 | BC049545 chrX      | 10477977 | 10478817 | 0.024854 | 1 |
| X         | 10450183 | 10484020 | BC049545 chrX      | 10481907 | 10482517 | 0.018057 | 1 |
| X         | 13362071 | 13370606 | BC100482 chrX      | 13367189 | 13368803 | 0.189199 | 1 |
| X         | 19999537 | 20012777 | NM_00970 chrX      | 20005366 | 20006442 | 0.081338 | 1 |
| X         | 20075356 | 20083870 | NM_01368 chrX      | 20082926 | 20083821 | 0.105226 | 1 |
| X         | 33616726 | 33625287 | NM_15350 chrX      | 33622545 | 33623124 | 0.067741 | 1 |
| X         | 33620093 | 33628683 | NM_01944 chrX      | 33622545 | 33623124 | 0.067513 | 1 |
| X         | 33670437 | 33683863 | NM_19406 chrX      | 33675282 | 33676012 | 0.054443 | 1 |
| X         | 33670437 | 33683863 | NM_19406 chrX      | 33681760 | 33682318 | 0.041633 | 1 |
| X         | 33690820 | 33699404 | NM_00103 chrX      | 33694023 | 33694712 | 0.080373 | 1 |
| X         | 33690820 | 33699404 | NM_00103 chrX      | 33695525 | 33696173 | 0.075597 | 1 |
| X         | 33732451 | 33740970 | NM_02130 chrX      | 33735629 | 33736353 | 0.085094 | 1 |
| X         | 33732451 | 33740970 | NM_02130 chrX      | 33737177 | 33737951 | 0.090962 | 1 |
| X         | 33732451 | 33740970 | NM_02130 chrX      | 33738694 | 33739602 | 0.10669  | 1 |
| X         | 33814492 | 33822991 | NM_00103 chrX      | 33819200 | 33819822 | 0.073294 | 1 |
| X         | 33965142 | 33979333 | NM_00104 chrX      | 33968498 | 33969150 | 0.046012 | 1 |
| X         | 33965142 | 33979333 | NM_00104 chrX      | 33977480 | 33978173 | 0.048901 | 1 |
| X         | 34121072 | 34129571 | NM_00100 chrX      | 34121670 | 34122268 | 0.070471 | 1 |
| X         | 34143837 | 34152397 | NM_02389 chrX      | 34147098 | 34147957 | 0.100456 | 1 |
| X         | 44385154 | 44393668 | NM_02877 chrX      | 44386218 | 44387000 | 0.091955 | 1 |
| X         | 47447960 | 47456617 | NM_13416 chrX      | 47450775 | 47451370 | 0.068838 | 1 |
| X         | 47922597 | 47932229 | NM_00107 chrX      | 47927897 | 47928535 | 0.066335 | 1 |
| X         | 48213175 | 48223399 | BC109337 chrX      | 48216874 | 48217529 | 0.064157 | 1 |
| X         | 53163222 | 53175110 | NM_17729 chrX      | 53163607 | 53164192 | 0.049289 | 1 |
| X         | 64179602 | 64188115 | NM_02576 chrX      | 64181141 | 64181997 | 0.100658 | 1 |
| X         | 69345296 | 69355761 | NM_01172 chrX      | 69347543 | 69349200 | 0.158418 | 1 |
| X         | 69363767 | 69378335 | NM_00102 chrX      | 69370231 | 69370925 | 0.047704 | 1 |
| X         | 69367923 | 69376422 | NM_00104 chrX      | 69370231 | 69370925 | 0.081765 | 1 |
| X         | 69399671 | 69408170 | NM_00102 chrX      | 69407518 | 69408119 | 0.070824 | 1 |
| X         | 69438936 | 69447441 | BC064787 chrX      | 69445342 | 69447406 | 0.24277  | 1 |
| X         | 69513675 | 69524110 | NM_01172 chrX      | 69516556 | 69517639 | 0.103871 | 1 |
| X         | 69540736 | 69549235 | NM_03149 chrX      | 69541676 | 69542281 | 0.071294 | 1 |
| X         | 70374184 | 70382713 | NM_00810 chrX      | 70376192 | 70376809 | 0.07245  | 1 |
| X         | 97495929 | 97504428 | NM_17293 chrX      | 97497910 | 97498914 | 0.118235 | 1 |
| X         | 97836783 | 97845438 | NM_13914 chrX      | 97840052 | 97840635 | 0.067468 | 1 |
| X         | 98705339 | 98713867 | NM_02738 chrX      | 98706430 | 98707137 | 0.083011 | 1 |

|   |          |          |          |      |          |          |          |   |
|---|----------|----------|----------|------|----------|----------|----------|---|
| X | 98999682 | 99009451 | BC116811 | chrX | 98999696 | 99000583 | 0.090891 | 1 |
| X | 98999682 | 99009451 | BC116811 | chrX | 99001237 | 99001876 | 0.065507 | 1 |
| X | 98999682 | 99009451 | BC116811 | chrX | 99003051 | 99003889 | 0.085875 | 1 |
| X | 98999682 | 99009451 | BC116811 | chrX | 99006926 | 99007916 | 0.101433 | 1 |
| X | 99108907 | 99117406 | NM_02759 | chrX | 99114347 | 99114918 | 0.067294 | 1 |
| X | 1.15E+08 | 1.15E+08 | BC111833 | chrX | 1.15E+08 | 1.15E+08 | 0.09111  | 1 |
| X | 1.3E+08  | 1.3E+08  | NM_18331 | chrX | 1.3E+08  | 1.3E+08  | 0.116118 | 1 |
| X | 1.31E+08 | 1.31E+08 | NM_18332 | chrX | 1.31E+08 | 1.31E+08 | 0.071303 | 1 |
| X | 1.31E+08 | 1.31E+08 | NM_03010 | chrX | 1.31E+08 | 1.31E+08 | 0.073395 | 1 |
| X | 1.32E+08 | 1.32E+08 | NM_17697 | chrX | 1.32E+08 | 1.32E+08 | 0.080898 | 1 |
| X | 1.39E+08 | 1.39E+08 | U39738   | chrX | 1.39E+08 | 1.39E+08 | 0.089294 | 1 |
| X | 1.4E+08  | 1.4E+08  | NM_02624 | chrX | 1.4E+08  | 1.4E+08  | 0.075018 | 1 |
| X | 1.43E+08 | 1.43E+08 | NM_00835 | chrX | 1.43E+08 | 1.43E+08 | 0.052276 | 1 |
| X | 1.46E+08 | 1.46E+08 | NM_00100 | chrX | 1.46E+08 | 1.46E+08 | 0.049976 | 1 |
| X | 1.46E+08 | 1.46E+08 | NM_00100 | chrX | 1.46E+08 | 1.46E+08 | 0.053016 | 1 |
| X | 1.5E+08  | 1.5E+08  | NM_02001 | chrX | 1.5E+08  | 1.5E+08  | 0.074135 | 1 |
| X | 1.53E+08 | 1.53E+08 | NM_02535 | chrX | 1.53E+08 | 1.53E+08 | 0.113335 | 1 |
| X | 1.56E+08 | 1.56E+08 | AF285577 | chrX | 1.56E+08 | 1.56E+08 | 0.053355 | 1 |
| X | 1.63E+08 | 1.63E+08 | NM_02127 | chrX | 1.63E+08 | 1.63E+08 | 0.073392 | 1 |
| Y | 1946029  | 1954528  | NM_01156 | chrY | 1952691  | 1953280  | 0.069412 | 1 |

length(bps) probes in r p-value(reg Fraction of MAT-score on T(H3K14acWTHF vs. control)

|      |    |          |   |         |
|------|----|----------|---|---------|
| 586  | 16 | 0.048728 | 0 | 5.30623 |
| 1210 | 32 | 0.024647 | 0 | 7.03993 |
| 617  | 10 | 0.038197 | 0 | 5.86969 |
| 606  | 16 | 0.045303 | 0 | 5.46901 |
| 639  | 12 | 0.044553 | 0 | 5.50629 |
| 766  | 20 | 0.033342 | 0 | 6.19781 |
| 598  | 11 | 0.043996 | 0 | 5.53741 |
| 593  | 15 | 0.042611 | 0 | 5.61493 |
| 568  | 16 | 0.024797 | 0 | 7.02807 |
| 787  | 14 | 0.017479 | 0 | 8.14185 |
| 787  | 14 | 0.017479 | 0 | 8.14185 |
| 739  | 20 | 0.035531 | 0 | 6.05649 |
| 1074 | 28 | 0.017443 | 0 | 8.14865 |
| 606  | 16 | 0.048931 | 0 | 5.29627 |
| 599  | 15 | 0.048587 | 0 | 5.31714 |
| 618  | 12 | 0.047907 | 0 | 5.34622 |
| 452  | 13 | 0.039556 | 0 | 5.79096 |
| 604  | 17 | 0.049355 | 0 | 5.27894 |
| 1208 | 34 | 0.02349  | 0 | 7.18503 |
| 619  | 14 | 0.03667  | 0 | 5.97639 |
| 586  | 11 | 0.033227 | 0 | 6.21055 |
| 1684 | 45 | 0.036237 | 0 | 6.00323 |
| 829  | 19 | 0.013418 | 0 | 9.14928 |
| 661  | 18 | 0.042072 | 0 | 5.65025 |
| 646  | 11 | 0.049726 | 0 | 5.26166 |
| 796  | 22 | 0.022139 | 0 | 7.37296 |
| 613  | 17 | 0.049187 | 0 | 5.28746 |
| 642  | 17 | 0.041569 | 0 | 5.67348 |
| 801  | 21 | 0.024161 | 0 | 7.0966  |
| 705  | 19 | 0.047836 | 0 | 5.35013 |
| 1034 | 25 | 0.02914  | 0 | 6.55345 |
| 599  | 11 | 0.019429 | 0 | 7.79722 |
| 1093 | 30 | 0.025088 | 0 | 6.99248 |
| 1020 | 27 | 0.031585 | 0 | 6.34008 |
| 745  | 19 | 0.048754 | 0 | 5.30397 |
| 906  | 20 | 0.034586 | 0 | 6.12069 |
| 886  | 22 | 0.018335 | 0 | 7.99856 |
| 1059 | 26 | 0.017946 | 0 | 8.06326 |
| 709  | 20 | 0.039283 | 0 | 5.80484 |
| 922  | 26 | 0.049478 | 0 | 5.27388 |
| 661  | 19 | 0.04894  | 0 | 5.29599 |
| 661  | 19 | 0.04894  | 0 | 5.29599 |
| 611  | 14 | 0.040059 | 0 | 5.75781 |
| 597  | 11 | 0.039247 | 0 | 5.80683 |

|      |    |          |   |         |
|------|----|----------|---|---------|
| 751  | 17 | 0.03448  | 0 | 6.13004 |
| 876  | 16 | 0.0256   | 0 | 6.93693 |
| 709  | 20 | 0.034763 | 0 | 6.10637 |
| 665  | 19 | 0.038956 | 0 | 5.82903 |
| 623  | 13 | 0.049249 | 0 | 5.28445 |
| 1004 | 27 | 0.029343 | 0 | 6.53217 |
| 512  | 13 | 0.041083 | 0 | 5.69551 |
| 957  | 27 | 0.035125 | 0 | 6.08133 |
| 957  | 27 | 0.035125 | 0 | 6.08133 |
| 679  | 14 | 0.036096 | 0 | 6.01321 |
| 615  | 15 | 0.046786 | 0 | 5.39387 |
| 603  | 12 | 0.035937 | 0 | 6.02219 |
| 597  | 12 | 0.022307 | 0 | 7.34489 |
| 585  | 16 | 0.049143 | 0 | 5.28982 |
| 820  | 23 | 0.01634  | 0 | 8.3675  |
| 1061 | 29 | 0.013568 | 0 | 9.09244 |
| 588  | 17 | 0.043246 | 0 | 5.57163 |
| 729  | 19 | 0.035425 | 0 | 6.05957 |
| 398  | 11 | 0.047845 | 0 | 5.34892 |
| 1040 | 22 | 0.021248 | 0 | 7.50646 |
| 608  | 12 | 0.047448 | 0 | 5.36836 |
| 1113 | 30 | 0.030835 | 0 | 6.40468 |
| 778  | 22 | 0.016764 | 0 | 8.28179 |
| 1680 | 46 | 0.035531 | 0 | 6.05588 |
| 689  | 19 | 0.033077 | 0 | 6.2253  |
| 1145 | 32 | 0.035019 | 0 | 6.0883  |
| 629  | 17 | 0.049249 | 0 | 5.28435 |
| 588  | 13 | 0.043123 | 0 | 5.58251 |
| 1072 | 30 | 0.017443 | 0 | 8.1536  |
| 450  | 13 | 0.049567 | 0 | 5.27092 |
| 588  | 17 | 0.045727 | 0 | 5.44843 |
| 605  | 17 | 0.049814 | 0 | 5.25646 |
| 590  | 16 | 0.043025 | 0 | 5.58768 |
| 997  | 27 | 0.018185 | 0 | 8.02509 |
| 816  | 22 | 0.033403 | 0 | 6.19412 |
| 982  | 27 | 0.016755 | 0 | 8.28317 |
| 630  | 15 | 0.037182 | 0 | 5.93825 |
| 1888 | 47 | 0.000556 | 0 | 38.9511 |
| 614  | 18 | 0.0399   | 0 | 5.76628 |
| 955  | 26 | 0.012879 | 0 | 9.33324 |
| 677  | 12 | 0.019606 | 0 | 7.76873 |
| 817  | 23 | 0.027127 | 0 | 6.74874 |
| 404  | 12 | 0.046724 | 0 | 5.39675 |
| 797  | 19 | 0.03569  | 0 | 6.04185 |
| 406  | 11 | 0.04201  | 0 | 5.65255 |
| 592  | 15 | 0.049072 | 0 | 5.29207 |
| 722  | 15 | 0.031682 | 0 | 6.3312  |

|      |    |          |   |         |
|------|----|----------|---|---------|
| 587  | 14 | 0.04563  | 0 | 5.45611 |
| 840  | 24 | 0.030217 | 0 | 6.45428 |
| 947  | 21 | 0.032918 | 0 | 6.23979 |
| 608  | 13 | 0.038038 | 0 | 5.88098 |
| 629  | 18 | 0.048446 | 0 | 5.32229 |
| 616  | 10 | 0.033368 | 0 | 6.19542 |
| 665  | 18 | 0.035919 | 0 | 6.02332 |
| 956  | 26 | 0.023826 | 0 | 7.13457 |
| 737  | 20 | 0.032141 | 0 | 6.29207 |
| 771  | 15 | 0.048022 | 0 | 5.33999 |
| 1032 | 27 | 0.020242 | 0 | 7.65058 |
| 652  | 19 | 0.04856  | 0 | 5.31757 |
| 603  | 17 | 0.037729 | 0 | 5.89723 |
| 637  | 18 | 0.044888 | 0 | 5.49198 |
| 599  | 16 | 0.043961 | 0 | 5.54035 |
| 1122 | 24 | 0.01717  | 0 | 8.19769 |
| 904  | 25 | 0.033483 | 0 | 6.18728 |
| 820  | 20 | 0.030111 | 0 | 6.46396 |
| 961  | 26 | 0.01024  | 0 | 10.3123 |
| 818  | 23 | 0.020798 | 0 | 7.58282 |
| 581  | 15 | 0.04984  | 0 | 5.25559 |
| 845  | 23 | 0.028919 | 0 | 6.56976 |
| 585  | 16 | 0.046671 | 0 | 5.39821 |
| 787  | 15 | 0.029405 | 0 | 6.52832 |
| 611  | 11 | 0.046857 | 0 | 5.39126 |
| 1125 | 25 | 0.023967 | 0 | 7.12062 |
| 1176 | 30 | 0.032229 | 0 | 6.28396 |
| 620  | 16 | 0.038947 | 0 | 5.82939 |
| 613  | 17 | 0.045727 | 0 | 5.44838 |
| 1146 | 26 | 0.013797 | 0 | 9.03254 |
| 1092 | 26 | 0.015854 | 0 | 8.46168 |
| 744  | 14 | 0.007583 | 0 | 11.8782 |
| 505  | 13 | 0.048225 | 0 | 5.3304  |
| 348  | 10 | 0.048657 | 0 | 5.31081 |
| 615  | 15 | 0.043431 | 0 | 5.56272 |
| 823  | 22 | 0.041587 | 0 | 5.67217 |
| 689  | 15 | 0.036246 | 0 | 6.00314 |
| 1034 | 29 | 0.038108 | 0 | 5.87672 |
| 1216 | 31 | 0.010849 | 0 | 10.0779 |
| 700  | 13 | 0.04224  | 0 | 5.64007 |
| 662  | 14 | 0.01965  | 0 | 7.76278 |
| 592  | 10 | 0.046971 | 0 | 5.38604 |
| 821  | 20 | 0.046645 | 0 | 5.39911 |
| 779  | 22 | 0.027533 | 0 | 6.70327 |
| 693  | 19 | 0.0323   | 0 | 6.28057 |
| 787  | 20 | 0.045788 | 0 | 5.44589 |
| 646  | 15 | 0.034922 | 0 | 6.09891 |

|      |    |          |       |         |
|------|----|----------|-------|---------|
| 617  | 15 | 0.038038 | 0     | 5.8811  |
| 624  | 12 | 0.027692 | 0     | 6.68724 |
| 870  | 18 | 0.017223 | 0     | 8.18595 |
| 738  | 18 | 0.032424 | 0     | 6.27267 |
| 666  | 19 | 0.024346 | 0     | 7.07343 |
| 887  | 24 | 0.023172 | 0     | 7.22577 |
| 731  | 20 | 0.024991 | 0     | 7.00728 |
| 676  | 17 | 0.043935 | 0     | 5.54238 |
| 666  | 15 | 0.039344 | 0     | 5.79861 |
| 616  | 14 | 0.049072 | 0     | 5.29202 |
| 606  | 17 | 0.040704 | 0     | 5.71678 |
| 759  | 17 | 0.04751  | 0     | 5.36622 |
| 631  | 14 | 0.024285 | 0     | 7.0828  |
| 636  | 13 | 0.048596 | 0     | 5.31423 |
| 604  | 17 | 0.049443 | 0     | 5.27576 |
| 825  | 23 | 0.026483 | 0     | 6.82461 |
| 702  | 20 | 0.031347 | 0     | 6.36116 |
| 948  | 26 | 0.046459 | 0     | 5.40657 |
| 814  | 23 | 0.032662 | 0     | 6.2589  |
| 397  | 11 | 0.02997  | 0     | 6.47774 |
| 397  | 11 | 0.02997  | 0     | 6.47774 |
| 965  | 27 | 0.021592 | 0     | 7.45214 |
| 965  | 27 | 0.021592 | 0     | 7.45214 |
| 1061 | 30 | 0.020109 | 0     | 7.67499 |
| 413  | 12 | 0.045294 | 0     | 5.46949 |
| 1548 | 41 | 0.022863 | 0.375 | 7.27394 |
| 1548 | 41 | 0.022863 | 0.375 | 7.27394 |
| 685  | 15 | 0.033041 | 0     | 6.22695 |
| 723  | 20 | 0.047051 | 0     | 5.38222 |
| 639  | 13 | 0.040474 | 0     | 5.73138 |
| 882  | 23 | 0.013277 | 0     | 9.18819 |
| 693  | 13 | 0.047819 | 0     | 5.3503  |
| 838  | 19 | 0.016225 | 0     | 8.3878  |
| 735  | 21 | 0.045303 | 0     | 5.46921 |
| 589  | 15 | 0.042805 | 0     | 5.60066 |
| 775  | 22 | 0.026589 | 0     | 6.8101  |
| 1071 | 31 | 0.018211 | 0     | 8.02112 |
| 727  | 20 | 0.024832 | 0     | 7.02522 |
| 1132 | 24 | 0.024673 | 0     | 7.03825 |
| 871  | 24 | 0.020665 | 0     | 7.59978 |
| 950  | 21 | 0.024832 | 0     | 7.02528 |
| 605  | 15 | 0.033209 | 0     | 6.21273 |
| 993  | 28 | 0.018291 | 0     | 8.00671 |
| 652  | 16 | 0.046362 | 0     | 5.412   |
| 840  | 24 | 0.036987 | 0     | 5.94986 |
| 660  | 14 | 0.046945 | 0     | 5.38736 |
| 1102 | 26 | 0.014027 | 0     | 8.97327 |

|      |    |          |   |         |
|------|----|----------|---|---------|
| 907  | 17 | 0.035001 | 0 | 6.09141 |
| 849  | 24 | 0.035328 | 0 | 6.06358 |
| 611  | 13 | 0.043546 | 0 | 5.55714 |
| 615  | 16 | 0.039018 | 0 | 5.82488 |
| 596  | 13 | 0.047616 | 0 | 5.36164 |
| 658  | 19 | 0.029581 | 0 | 6.51851 |
| 685  | 20 | 0.048604 | 0 | 5.3133  |
| 872  | 24 | 0.01009  | 0 | 10.3779 |
| 591  | 17 | 0.045833 | 0 | 5.4439  |
| 1026 | 26 | 0.025882 | 0 | 6.90047 |
| 861  | 24 | 0.019271 | 0 | 7.81958 |
| 631  | 18 | 0.044632 | 0 | 5.50436 |
| 682  | 19 | 0.039848 | 0 | 5.77175 |
| 623  | 13 | 0.04246  | 0 | 5.62901 |
| 561  | 16 | 0.047633 | 0 | 5.36061 |
| 679  | 18 | 0.033721 | 0 | 6.17135 |
| 808  | 22 | 0.032353 | 0 | 6.27685 |
| 944  | 25 | 0.019818 | 0 | 7.72913 |
| 1068 | 29 | 0.036555 | 0 | 5.98644 |
| 620  | 10 | 0.019147 | 0 | 7.85039 |
| 590  | 13 | 0.048446 | 0 | 5.32217 |
| 593  | 15 | 0.03569  | 0 | 6.04059 |
| 716  | 13 | 0.039291 | 0 | 5.80444 |
| 926  | 25 | 0.035213 | 0 | 6.07197 |
| 829  | 23 | 0.025935 | 0 | 6.89377 |
| 609  | 16 | 0.045788 | 0 | 5.44559 |
| 788  | 22 | 0.029369 | 0 | 6.53032 |
| 678  | 15 | 0.032997 | 0 | 6.2356  |
| 733  | 21 | 0.01054  | 0 | 10.192  |
| 1078 | 29 | 0.006532 | 0 | 12.7084 |
| 980  | 27 | 0.036122 | 0 | 6.01022 |
| 599  | 15 | 0.04728  | 0 | 5.37567 |
| 798  | 22 | 0.032079 | 0 | 6.29814 |
| 751  | 25 | 0.032397 | 0 | 6.27352 |
| 597  | 11 | 0.04999  | 0 | 5.24789 |
| 597  | 11 | 0.04999  | 0 | 5.24789 |
| 610  | 17 | 0.047678 | 0 | 5.358   |
| 847  | 23 | 0.03102  | 0 | 6.38354 |
| 600  | 12 | 0.04954  | 0 | 5.27214 |
| 597  | 14 | 0.048719 | 0 | 5.30745 |
| 692  | 19 | 0.042328 | 0 | 5.63668 |
| 598  | 16 | 0.048754 | 0 | 5.30521 |
| 598  | 16 | 0.048754 | 0 | 5.30521 |
| 602  | 17 | 0.04992  | 0 | 5.25104 |
| 791  | 19 | 0.035222 | 0 | 6.07043 |
| 936  | 25 | 0.034604 | 0 | 6.11958 |
| 1011 | 27 | 0.043202 | 0 | 5.57638 |



|      |    |          |   |         |
|------|----|----------|---|---------|
| 634  | 18 | 0.029881 | 0 | 6.49113 |
| 827  | 21 | 0.033139 | 0 | 6.21773 |
| 594  | 11 | 0.04992  | 0 | 5.25068 |
| 639  | 16 | 0.03682  | 0 | 5.96269 |
| 662  | 17 | 0.040713 | 0 | 5.7159  |
| 516  | 12 | 0.037676 | 0 | 5.8998  |
| 587  | 12 | 0.048931 | 0 | 5.29603 |
| 751  | 20 | 0.031611 | 0 | 6.33738 |
| 606  | 17 | 0.047218 | 0 | 5.37693 |
| 714  | 20 | 0.016702 | 0 | 8.29777 |
| 719  | 16 | 0.032529 | 0 | 6.26822 |
| 888  | 14 | 0.031002 | 0 | 6.38567 |
| 537  | 15 | 0.048754 | 0 | 5.30517 |
| 628  | 15 | 0.049116 | 0 | 5.29086 |
| 883  | 24 | 0.033915 | 0 | 6.1637  |
| 883  | 24 | 0.033915 | 0 | 6.1637  |
| 619  | 11 | 0.040068 | 0 | 5.75614 |
| 582  | 14 | 0.049231 | 0 | 5.28508 |
| 971  | 27 | 0.024488 | 0 | 7.05928 |
| 1482 | 35 | 0.0122   | 0 | 9.578   |
| 1169 | 26 | 0.008342 | 0 | 11.399  |
| 528  | 15 | 0.049699 | 0 | 5.26397 |
| 680  | 13 | 0.019368 | 0 | 7.80458 |
| 593  | 16 | 0.041428 | 0 | 5.67785 |
| 716  | 15 | 0.030702 | 0 | 6.41113 |
| 641  | 18 | 0.025741 | 0 | 6.91433 |
| 1104 | 30 | 0.022837 | 0 | 7.28059 |
| 593  | 17 | 0.040289 | 0 | 5.74214 |
| 643  | 19 | 0.029987 | 0 | 6.47631 |
| 741  | 21 | 0.028186 | 0 | 6.63001 |
| 741  | 21 | 0.028186 | 0 | 6.63001 |
| 923  | 16 | 0.048931 | 0 | 5.29641 |
| 1056 | 22 | 0.018202 | 0 | 8.02427 |
| 559  | 14 | 0.048022 | 0 | 5.34001 |
| 551  | 10 | 0.04728  | 0 | 5.37545 |
| 685  | 18 | 0.02447  | 0 | 7.06216 |
| 890  | 23 | 0.04352  | 0 | 5.55889 |
| 591  | 10 | 0.020303 | 0 | 7.64083 |
| 995  | 22 | 0.020815 | 0 | 7.57694 |
| 608  | 17 | 0.041613 | 0 | 5.67156 |
| 609  | 17 | 0.040801 | 0 | 5.71051 |
| 902  | 21 | 0.023287 | 0 | 7.21212 |
| 624  | 16 | 0.042072 | 0 | 5.64994 |
| 836  | 21 | 0.008386 | 0 | 11.3569 |
| 1087 | 30 | 0.032212 | 0 | 6.28542 |
| 628  | 13 | 0.035884 | 0 | 6.02997 |
| 867  | 24 | 0.015307 | 0 | 8.59971 |

|      |    |          |   |         |
|------|----|----------|---|---------|
| 745  | 21 | 0.043237 | 0 | 5.57397 |
| 884  | 21 | 0.049346 | 0 | 5.27978 |
| 774  | 22 | 0.022457 | 0 | 7.3267  |
| 804  | 16 | 0.01242  | 0 | 9.49956 |
| 379  | 11 | 0.047845 | 0 | 5.34882 |
| 596  | 17 | 0.046124 | 0 | 5.42936 |
| 628  | 14 | 0.041534 | 0 | 5.67532 |
| 637  | 15 | 0.049884 | 0 | 5.25251 |
| 598  | 17 | 0.039247 | 0 | 5.80723 |
| 524  | 13 | 0.036996 | 0 | 5.94949 |
| 641  | 11 | 0.040165 | 0 | 5.75172 |
| 996  | 25 | 0.024797 | 0 | 7.02804 |
| 726  | 21 | 0.045894 | 0 | 5.441   |
| 598  | 17 | 0.04578  | 0 | 5.44622 |
| 649  | 18 | 0.040977 | 0 | 5.7006  |
| 652  | 18 | 0.031576 | 0 | 6.3411  |
| 615  | 12 | 0.04984  | 0 | 5.25447 |
| 1041 | 28 | 0.035522 | 0 | 6.05717 |
| 613  | 17 | 0.036175 | 0 | 6.006   |
| 812  | 23 | 0.029758 | 0 | 6.50373 |
| 616  | 11 | 0.042805 | 0 | 5.60054 |
| 832  | 22 | 0.049602 | 0 | 5.2678  |
| 613  | 10 | 0.048587 | 0 | 5.31519 |
| 638  | 18 | 0.040518 | 0 | 5.72983 |
| 981  | 24 | 0.008916 | 0 | 11.0575 |
| 613  | 17 | 0.045285 | 0 | 5.4713  |
| 780  | 18 | 0.035893 | 0 | 6.0271  |
| 589  | 15 | 0.03923  | 0 | 5.80878 |
| 927  | 25 | 0.035822 | 0 | 6.03385 |
| 637  | 18 | 0.035919 | 0 | 6.02309 |
| 585  | 13 | 0.046345 | 0 | 5.41384 |
| 896  | 22 | 0.032997 | 0 | 6.23518 |
| 864  | 21 | 0.03268  | 0 | 6.25735 |
| 1140 | 31 | 0.022025 | 0 | 7.38308 |
| 596  | 14 | 0.047607 | 0 | 5.36207 |
| 994  | 25 | 0.037596 | 0 | 5.90574 |
| 591  | 17 | 0.047757 | 0 | 5.35288 |
| 746  | 21 | 0.031091 | 0 | 6.37911 |
| 650  | 16 | 0.034154 | 0 | 6.14677 |
| 1152 | 31 | 0.017991 | 0 | 8.06032 |
| 634  | 15 | 0.017196 | 0 | 8.193   |
| 634  | 15 | 0.017196 | 0 | 8.193   |
| 795  | 21 | 0.033033 | 0 | 6.22976 |
| 787  | 21 | 0.03463  | 0 | 6.11841 |
| 699  | 19 | 0.047907 | 0 | 5.3461  |
| 876  | 20 | 0.03328  | 0 | 6.20736 |
| 530  | 11 | 0.02823  | 0 | 6.62528 |

|      |    |          |   |         |
|------|----|----------|---|---------|
| 601  | 17 | 0.044835 | 0 | 5.49492 |
| 641  | 18 | 0.044129 | 0 | 5.53069 |
| 770  | 22 | 0.029811 | 0 | 6.49725 |
| 913  | 23 | 0.027101 | 0 | 6.75169 |
| 637  | 18 | 0.034957 | 0 | 6.09588 |
| 861  | 24 | 0.023393 | 0 | 7.19733 |
| 861  | 24 | 0.023393 | 0 | 7.19733 |
| 915  | 26 | 0.024991 | 0 | 7.00576 |
| 1136 | 25 | 0.03569  | 0 | 6.042   |
| 920  | 23 | 0.016278 | 0 | 8.37721 |
| 715  | 20 | 0.047007 | 0 | 5.38548 |
| 715  | 20 | 0.047007 | 0 | 5.38548 |
| 726  | 17 | 0.047633 | 0 | 5.36116 |
| 880  | 17 | 0.023331 | 0 | 7.20861 |
| 999  | 25 | 0.020339 | 0 | 7.63523 |
| 641  | 18 | 0.048649 | 0 | 5.31143 |
| 614  | 11 | 0.046362 | 0 | 5.41234 |
| 874  | 25 | 0.032529 | 0 | 6.26818 |
| 729  | 20 | 0.022113 | 0 | 7.37568 |
| 619  | 17 | 0.045735 | 0 | 5.44827 |
| 608  | 15 | 0.048587 | 0 | 5.31706 |
| 688  | 19 | 0.042275 | 0 | 5.63841 |
| 606  | 16 | 0.04849  | 0 | 5.31999 |
| 684  | 20 | 0.048348 | 0 | 5.32581 |
| 1081 | 31 | 0.017461 | 0 | 8.14306 |
| 770  | 20 | 0.035663 | 0 | 6.0441  |
| 987  | 27 | 0.026527 | 0 | 6.81475 |
| 843  | 21 | 0.036246 | 0 | 6.00309 |
| 740  | 17 | 0.030799 | 0 | 6.40714 |
| 601  | 14 | 0.049266 | 0 | 5.28373 |
| 1444 | 40 | 0.022501 | 0 | 7.32026 |
| 629  | 18 | 0.047845 | 0 | 5.34881 |
| 1106 | 28 | 0.034304 | 0 | 6.13833 |
| 939  | 21 | 0.029087 | 0 | 6.55862 |
| 733  | 20 | 0.033156 | 0 | 6.21631 |
| 1073 | 28 | 0.03561  | 0 | 6.04784 |
| 642  | 18 | 0.041128 | 0 | 5.69171 |
| 608  | 16 | 0.044279 | 0 | 5.52436 |
| 815  | 21 | 0.049717 | 0 | 5.26233 |
| 777  | 19 | 0.025044 | 0 | 6.99991 |
| 887  | 21 | 0.021204 | 0 | 7.51208 |
| 917  | 22 | 0.048684 | 0 | 5.30833 |
| 817  | 21 | 0.01995  | 0 | 7.70551 |
| 581  | 17 | 0.04141  | 0 | 5.67965 |
| 1115 | 28 | 0.029881 | 0 | 6.49021 |
| 608  | 15 | 0.047969 | 0 | 5.34159 |
| 450  | 13 | 0.048666 | 0 | 5.30992 |

|      |    |          |   |         |
|------|----|----------|---|---------|
| 450  | 13 | 0.048666 | 0 | 5.30992 |
| 669  | 15 | 0.015801 | 0 | 8.47264 |
| 970  | 21 | 0.030632 | 0 | 6.41544 |
| 1058 | 29 | 0.008986 | 0 | 11.0166 |
| 745  | 21 | 0.047572 | 0 | 5.36395 |
| 488  | 11 | 0.046821 | 0 | 5.39265 |
| 697  | 20 | 0.031973 | 0 | 6.30912 |
| 943  | 26 | 0.043988 | 0 | 5.5378  |
| 934  | 24 | 0.041675 | 0 | 5.66873 |
| 649  | 18 | 0.046424 | 0 | 5.41092 |
| 728  | 16 | 0.048657 | 0 | 5.31068 |
| 593  | 17 | 0.031373 | 0 | 6.35828 |
| 791  | 22 | 0.03524  | 0 | 6.06844 |
| 629  | 18 | 0.046265 | 0 | 5.41699 |
| 619  | 17 | 0.032556 | 0 | 6.2672  |
| 869  | 19 | 0.035134 | 0 | 6.07789 |
| 648  | 16 | 0.043326 | 0 | 5.56776 |
| 806  | 19 | 0.042708 | 0 | 5.60474 |
| 589  | 12 | 0.043211 | 0 | 5.57518 |
| 1171 | 27 | 0.020242 | 0 | 7.65088 |
| 1545 | 43 | 0.013065 | 0 | 9.27689 |
| 743  | 19 | 0.015784 | 0 | 8.48451 |
| 527  | 15 | 0.045612 | 0 | 5.45698 |
| 735  | 19 | 0.034586 | 0 | 6.11973 |
| 802  | 23 | 0.031276 | 0 | 6.36505 |
| 711  | 20 | 0.029837 | 0 | 6.49383 |
| 727  | 20 | 0.030331 | 0 | 6.44186 |
| 1034 | 25 | 0.036069 | 0 | 6.01448 |
| 972  | 26 | 0.015925 | 0 | 8.44996 |
| 739  | 17 | 0.024187 | 0 | 7.09481 |
| 644  | 18 | 0.038629 | 0 | 5.8464  |
| 930  | 26 | 0.015386 | 0 | 8.58564 |
| 584  | 17 | 0.04954  | 0 | 5.272   |
| 584  | 17 | 0.04954  | 0 | 5.272   |
| 995  | 25 | 0.018688 | 0 | 7.93075 |
| 848  | 24 | 0.022139 | 0 | 7.37231 |
| 674  | 19 | 0.048684 | 0 | 5.30832 |
| 720  | 20 | 0.040192 | 0 | 5.74857 |
| 591  | 17 | 0.041984 | 0 | 5.65302 |
| 1134 | 26 | 0.015192 | 0 | 8.63044 |
| 928  | 26 | 0.035116 | 0 | 6.08322 |
| 752  | 20 | 0.03569  | 0 | 6.04231 |
| 618  | 15 | 0.045665 | 0 | 5.45246 |
| 639  | 13 | 0.033483 | 0 | 6.18721 |
| 591  | 11 | 0.041745 | 0 | 5.66297 |
| 662  | 19 | 0.033642 | 0 | 6.17536 |
| 604  | 15 | 0.040898 | 0 | 5.70456 |

|      |    |          |   |         |
|------|----|----------|---|---------|
| 708  | 16 | 0.035601 | 0 | 6.05047 |
| 766  | 22 | 0.03576  | 0 | 6.03633 |
| 941  | 21 | 0.035381 | 0 | 6.06126 |
| 608  | 17 | 0.049346 | 0 | 5.27993 |
| 625  | 18 | 0.036493 | 0 | 5.99095 |
| 666  | 18 | 0.038568 | 0 | 5.85227 |
| 612  | 16 | 0.049867 | 0 | 5.25332 |
| 862  | 18 | 0.023508 | 0 | 7.18086 |
| 568  | 10 | 0.046309 | 0 | 5.41587 |
| 620  | 15 | 0.03132  | 0 | 6.36367 |
| 605  | 11 | 0.036793 | 0 | 5.96467 |
| 618  | 10 | 0.048596 | 0 | 5.3139  |
| 618  | 10 | 0.048596 | 0 | 5.3139  |
| 644  | 13 | 0.048031 | 0 | 5.3391  |
| 847  | 21 | 0.018167 | 0 | 8.02867 |
| 682  | 14 | 0.026562 | 0 | 6.81301 |
| 679  | 14 | 0.022872 | 0 | 7.27202 |
| 640  | 17 | 0.035663 | 0 | 6.04365 |
| 833  | 17 | 0.038126 | 0 | 5.87412 |
| 595  | 17 | 0.04992  | 0 | 5.251   |
| 660  | 13 | 0.041119 | 0 | 5.69389 |
| 1368 | 32 | 0.022298 | 0 | 7.34792 |
| 565  | 14 | 0.049884 | 0 | 5.25255 |
| 1557 | 38 | 0.014583 | 0 | 8.81671 |
| 605  | 14 | 0.046106 | 0 | 5.4301  |
| 795  | 18 | 0.010469 | 0 | 10.219  |
| 720  | 13 | 0.027295 | 0 | 6.73638 |
| 720  | 13 | 0.027295 | 0 | 6.73638 |
| 423  | 11 | 0.047289 | 0 | 5.37484 |
| 853  | 22 | 0.040713 | 0 | 5.71601 |
| 661  | 16 | 0.047969 | 0 | 5.34244 |
| 703  | 18 | 0.048693 | 0 | 5.30811 |
| 735  | 19 | 0.04254  | 0 | 5.62009 |
| 1194 | 32 | 0.022219 | 0 | 7.35855 |
| 886  | 26 | 0.035142 | 0 | 6.07558 |
| 771  | 22 | 0.022731 | 0 | 7.29608 |
| 1116 | 27 | 0.020877 | 0 | 7.56407 |
| 931  | 24 | 0.01528  | 0 | 8.60542 |
| 854  | 18 | 0.049902 | 0 | 5.25183 |
| 376  | 11 | 0.041198 | 0 | 5.68733 |
| 613  | 13 | 0.043449 | 0 | 5.56195 |
| 675  | 19 | 0.04992  | 0 | 5.25076 |
| 886  | 23 | 0.011652 | 0 | 9.74806 |
| 688  | 16 | 0.034869 | 0 | 6.10259 |
| 828  | 18 | 0.022925 | 0 | 7.26229 |
| 755  | 15 | 0.03125  | 0 | 6.36585 |
| 855  | 20 | 0.029502 | 0 | 6.52219 |

|      |    |          |   |         |
|------|----|----------|---|---------|
| 607  | 17 | 0.045965 | 0 | 5.43638 |
| 617  | 11 | 0.040068 | 0 | 5.75698 |
| 695  | 19 | 0.048428 | 0 | 5.32379 |
| 743  | 21 | 0.034683 | 0 | 6.11446 |
| 637  | 14 | 0.035716 | 0 | 6.03878 |
| 681  | 19 | 0.039018 | 0 | 5.82503 |
| 742  | 21 | 0.031523 | 0 | 6.34643 |
| 814  | 17 | 0.048313 | 0 | 5.32737 |
| 596  | 17 | 0.039812 | 0 | 5.77293 |
| 588  | 17 | 0.049319 | 0 | 5.28269 |
| 769  | 19 | 0.036008 | 0 | 6.01947 |
| 617  | 16 | 0.047757 | 0 | 5.35379 |
| 617  | 16 | 0.047757 | 0 | 5.35379 |
| 455  | 13 | 0.049434 | 0 | 5.27604 |
| 455  | 13 | 0.049434 | 0 | 5.27604 |
| 688  | 16 | 0.005208 | 0 | 14.0361 |
| 625  | 11 | 0.047148 | 0 | 5.37896 |
| 550  | 16 | 0.048525 | 0 | 5.31933 |
| 1120 | 31 | 0.023667 | 0 | 7.15936 |
| 852  | 17 | 0.017991 | 0 | 8.05784 |
| 1186 | 23 | 0.006665 | 0 | 12.5909 |
| 608  | 17 | 0.048278 | 0 | 5.32904 |
| 824  | 24 | 0.031567 | 0 | 6.34329 |
| 824  | 18 | 0.03132  | 0 | 6.36276 |
| 697  | 18 | 0.040871 | 0 | 5.70672 |
| 821  | 22 | 0.048534 | 0 | 5.3189  |
| 609  | 16 | 0.031567 | 0 | 6.34335 |
| 634  | 15 | 0.035601 | 0 | 6.05021 |
| 728  | 19 | 0.034957 | 0 | 6.09588 |
| 645  | 16 | 0.039256 | 0 | 5.8061  |
| 615  | 17 | 0.047969 | 0 | 5.343   |
| 650  | 18 | 0.046662 | 0 | 5.39853 |
| 907  | 19 | 0.02161  | 0 | 7.44527 |
| 907  | 19 | 0.02161  | 0 | 7.44527 |
| 1047 | 27 | 0.021451 | 0 | 7.473   |
| 614  | 17 | 0.047519 | 0 | 5.3659  |
| 995  | 27 | 0.034869 | 0 | 6.10159 |
| 785  | 22 | 0.035955 | 0 | 6.02167 |
| 591  | 16 | 0.042761 | 0 | 5.60264 |
| 619  | 16 | 0.04164  | 0 | 5.67075 |
| 632  | 18 | 0.046742 | 0 | 5.39664 |
| 906  | 15 | 0.023976 | 0 | 7.11807 |
| 712  | 18 | 0.044305 | 0 | 5.52278 |
| 712  | 18 | 0.044305 | 0 | 5.52278 |
| 821  | 23 | 0.046318 | 0 | 5.41501 |
| 607  | 16 | 0.041189 | 0 | 5.68886 |
| 863  | 24 | 0.031682 | 0 | 6.33198 |

|      |    |          |   |         |
|------|----|----------|---|---------|
| 635  | 11 | 0.04615  | 0 | 5.42725 |
| 712  | 20 | 0.036008 | 0 | 6.01844 |
| 881  | 25 | 0.01973  | 0 | 7.74823 |
| 1091 | 27 | 0.008951 | 0 | 11.0484 |
| 1157 | 28 | 0.013427 | 0 | 9.14123 |
| 843  | 24 | 0.03328  | 0 | 6.20686 |
| 947  | 25 | 0.022837 | 0 | 7.28349 |
| 613  | 13 | 0.046706 | 0 | 5.39761 |
| 632  | 35 | 0.043105 | 0 | 5.58419 |
| 586  | 10 | 0.045409 | 0 | 5.4655  |
| 586  | 10 | 0.045409 | 0 | 5.4655  |
| 639  | 18 | 0.046142 | 0 | 5.42869 |
| 614  | 11 | 0.048834 | 0 | 5.30032 |
| 642  | 16 | 0.035045 | 0 | 6.08689 |
| 434  | 12 | 0.045841 | 0 | 5.44357 |
| 1042 | 28 | 0.021283 | 0 | 7.5012  |
| 652  | 17 | 0.028795 | 0 | 6.58113 |
| 789  | 20 | 0.043096 | 0 | 5.58459 |
| 955  | 26 | 0.017346 | 0 | 8.16796 |
| 664  | 17 | 0.024196 | 0 | 7.09327 |
| 616  | 12 | 0.049964 | 0 | 5.24864 |
| 1100 | 30 | 0.005747 | 0 | 13.4841 |
| 584  | 17 | 0.044129 | 0 | 5.53078 |
| 851  | 20 | 0.016031 | 0 | 8.43636 |
| 599  | 17 | 0.045612 | 0 | 5.4569  |
| 854  | 24 | 0.017417 | 0 | 8.15692 |
| 1100 | 24 | 0.016949 | 0 | 8.2373  |
| 652  | 15 | 0.02372  | 0 | 7.14905 |
| 740  | 18 | 0.047792 | 0 | 5.35088 |
| 408  | 12 | 0.043114 | 0 | 5.5835  |
| 807  | 16 | 0.016402 | 0 | 8.35367 |
| 655  | 19 | 0.043334 | 0 | 5.56608 |
| 754  | 21 | 0.021001 | 0 | 7.54024 |
| 624  | 18 | 0.043334 | 0 | 5.56601 |
| 546  | 10 | 0.042946 | 0 | 5.59221 |
| 546  | 10 | 0.042946 | 0 | 5.59221 |
| 609  | 31 | 0.03591  | 0 | 6.02415 |
| 599  | 13 | 0.048313 | 0 | 5.32728 |
| 763  | 16 | 0.034966 | 0 | 6.09425 |
| 634  | 17 | 0.043175 | 0 | 5.57889 |
| 589  | 14 | 0.035487 | 0 | 6.05785 |
| 657  | 16 | 0.046186 | 0 | 5.42241 |
| 657  | 16 | 0.046186 | 0 | 5.42241 |
| 688  | 17 | 0.031982 | 0 | 6.3079  |
| 688  | 17 | 0.031982 | 0 | 6.3079  |
| 800  | 21 | 0.032212 | 0 | 6.28671 |
| 800  | 21 | 0.032212 | 0 | 6.28671 |

|      |    |          |   |         |
|------|----|----------|---|---------|
| 615  | 10 | 0.049161 | 0 | 5.28887 |
| 615  | 10 | 0.049161 | 0 | 5.28887 |
| 609  | 12 | 0.039962 | 0 | 5.76067 |
| 657  | 19 | 0.039044 | 0 | 5.82333 |
| 774  | 22 | 0.015607 | 0 | 8.51972 |
| 774  | 22 | 0.015607 | 0 | 8.51972 |
| 917  | 17 | 0.030102 | 0 | 6.46457 |
| 645  | 17 | 0.042143 | 0 | 5.64674 |
| 645  | 17 | 0.042143 | 0 | 5.64674 |
| 730  | 14 | 0.019659 | 0 | 7.76084 |
| 1172 | 32 | 0.014901 | 0 | 8.73097 |
| 894  | 25 | 0.033041 | 0 | 6.2273  |
| 497  | 11 | 0.043793 | 0 | 5.54979 |
| 759  | 16 | 0.048287 | 0 | 5.32876 |
| 501  | 10 | 0.037897 | 0 | 5.88582 |
| 590  | 16 | 0.046124 | 0 | 5.42945 |
| 590  | 16 | 0.046124 | 0 | 5.42945 |
| 909  | 24 | 0.046106 | 0 | 5.43009 |
| 1004 | 26 | 0.023702 | 0 | 7.15474 |
| 710  | 18 | 0.033041 | 0 | 6.22905 |
| 822  | 23 | 0.02387  | 0 | 7.13156 |
| 1006 | 24 | 0.017249 | 0 | 8.18167 |
| 887  | 22 | 0.045427 | 0 | 5.46396 |
| 748  | 19 | 0.040827 | 0 | 5.70896 |
| 605  | 17 | 0.043184 | 0 | 5.57809 |
| 542  | 16 | 0.049858 | 0 | 5.25389 |
| 609  | 11 | 0.023066 | 0 | 7.24212 |
| 643  | 16 | 0.02786  | 0 | 6.66711 |
| 940  | 25 | 0.047925 | 0 | 5.34446 |
| 424  | 12 | 0.049982 | 0 | 5.24821 |
| 611  | 15 | 0.043087 | 0 | 5.58498 |
| 1048 | 28 | 0.048666 | 0 | 5.30979 |
| 935  | 26 | 0.0183   | 0 | 8.00463 |
| 799  | 22 | 0.032989 | 0 | 6.2357  |
| 677  | 19 | 0.049214 | 0 | 5.2868  |
| 791  | 16 | 0.024832 | 0 | 7.02542 |
| 513  | 14 | 0.048225 | 0 | 5.3301  |
| 855  | 20 | 0.030331 | 0 | 6.44071 |
| 768  | 21 | 0.01724  | 0 | 8.18373 |
| 626  | 12 | 0.019809 | 0 | 7.73003 |
| 710  | 19 | 0.029299 | 0 | 6.53774 |
| 960  | 27 | 0.036069 | 0 | 6.01412 |
| 664  | 19 | 0.035955 | 0 | 6.02163 |
| 836  | 17 | 0.0378   | 0 | 5.89102 |
| 613  | 17 | 0.041895 | 0 | 5.65656 |
| 840  | 18 | 0.013568 | 0 | 9.08966 |
| 917  | 26 | 0.035699 | 0 | 6.04041 |



|      |    |          |     |         |
|------|----|----------|-----|---------|
| 606  | 10 | 0.031656 | 0   | 6.33434 |
| 611  | 17 | 0.038868 | 0   | 5.83357 |
| 604  | 17 | 0.049337 | 0   | 5.28074 |
| 618  | 17 | 0.045241 | 0   | 5.4748  |
| 1346 | 36 | 0.035213 | 0.5 | 6.07094 |
| 593  | 16 | 0.046194 | 0   | 5.42197 |
| 949  | 26 | 0.015139 | 0   | 8.6467  |
| 982  | 26 | 0.024867 | 0   | 7.02131 |
| 865  | 22 | 0.03328  | 0   | 6.20644 |
| 874  | 23 | 0.024461 | 0   | 7.06292 |
| 610  | 17 | 0.047854 | 0   | 5.34782 |
| 774  | 14 | 0.033174 | 0   | 6.2141  |
| 627  | 15 | 0.037676 | 0   | 5.90021 |
| 1008 | 22 | 0.032424 | 0   | 6.27279 |
| 815  | 23 | 0.012835 | 0   | 9.33808 |
| 1083 | 30 | 0.034101 | 0   | 6.15135 |
| 966  | 27 | 0.023137 | 0   | 7.23273 |
| 904  | 26 | 0.033659 | 0   | 6.1739  |
| 615  | 15 | 0.042637 | 0   | 5.6128  |
| 750  | 21 | 0.030799 | 0   | 6.40686 |
| 713  | 20 | 0.047015 | 0   | 5.38516 |
| 560  | 10 | 0.030084 | 0   | 6.46513 |
| 878  | 25 | 0.02771  | 0   | 6.6866  |
| 658  | 19 | 0.045427 | 0   | 5.46411 |
| 862  | 19 | 0.026792 | 0   | 6.78139 |
| 727  | 20 | 0.024982 | 0   | 7.00843 |
| 607  | 17 | 0.039644 | 0   | 5.78345 |
| 600  | 17 | 0.025644 | 0   | 6.93029 |
| 1012 | 27 | 0.038453 | 0   | 5.86112 |
| 776  | 22 | 0.029422 | 0   | 6.52751 |
| 762  | 20 | 0.042663 | 0   | 5.60904 |
| 584  | 16 | 0.044403 | 0   | 5.51725 |
| 598  | 17 | 0.033598 | 0   | 6.17815 |
| 1412 | 37 | 0.008775 | 0   | 11.1353 |
| 599  | 13 | 0.037508 | 0   | 5.91264 |
| 989  | 28 | 0.023278 | 0   | 7.21343 |
| 656  | 17 | 0.048057 | 0   | 5.33682 |
| 705  | 17 | 0.04743  | 0   | 5.36893 |
| 693  | 12 | 0.033289 | 0   | 6.20529 |
| 678  | 19 | 0.035125 | 0   | 6.08064 |
| 1343 | 38 | 0.017443 | 0   | 8.14965 |
| 978  | 23 | 0.024523 | 0   | 7.05512 |
| 557  | 12 | 0.043246 | 0   | 5.57199 |
| 593  | 14 | 0.044632 | 0   | 5.50421 |
| 536  | 15 | 0.049249 | 0   | 5.28454 |
| 607  | 16 | 0.049319 | 0   | 5.28277 |
| 1087 | 29 | 0.032909 | 0   | 6.24051 |

|      |    |          |   |         |
|------|----|----------|---|---------|
| 992  | 24 | 0.033059 | 0 | 6.22632 |
| 1050 | 29 | 0.033315 | 0 | 6.20108 |
| 615  | 17 | 0.04254  | 0 | 5.61841 |
| 783  | 21 | 0.045983 | 0 | 5.43603 |
| 592  | 13 | 0.048931 | 0 | 5.29606 |
| 1053 | 27 | 0.01265  | 0 | 9.4065  |
| 908  | 25 | 0.022263 | 0 | 7.35121 |
| 638  | 18 | 0.049346 | 0 | 5.28019 |
| 1058 | 28 | 0.036034 | 0 | 6.01691 |
| 674  | 19 | 0.033156 | 0 | 6.21605 |
| 603  | 17 | 0.048101 | 0 | 5.33485 |
| 611  | 18 | 0.049567 | 0 | 5.27066 |
| 714  | 18 | 0.021663 | 0 | 7.44145 |
| 912  | 16 | 0.035328 | 0 | 6.06464 |
| 619  | 18 | 0.042513 | 0 | 5.62439 |
| 535  | 14 | 0.049717 | 0 | 5.26234 |
| 756  | 20 | 0.049072 | 0 | 5.29253 |
| 526  | 14 | 0.049346 | 0 | 5.28031 |
| 695  | 18 | 0.037579 | 0 | 5.90829 |
| 641  | 18 | 0.030994 | 0 | 6.38624 |
| 570  | 15 | 0.033871 | 0 | 6.16517 |
| 919  | 22 | 0.015775 | 0 | 8.48619 |
| 1031 | 26 | 0.018052 | 0 | 8.04926 |
| 1108 | 31 | 0.040068 | 0 | 5.75724 |
| 897  | 25 | 0.022713 | 0 | 7.29795 |
| 1153 | 29 | 0.034021 | 0 | 6.15864 |
| 611  | 10 | 0.044155 | 0 | 5.52855 |
| 650  | 18 | 0.044694 | 0 | 5.50085 |
| 721  | 14 | 0.033659 | 0 | 6.1736  |
| 682  | 19 | 0.030173 | 0 | 6.45659 |
| 640  | 18 | 0.038029 | 0 | 5.88137 |
| 603  | 11 | 0.030067 | 0 | 6.46835 |
| 866  | 23 | 0.022237 | 0 | 7.35757 |
| 760  | 15 | 0.030596 | 0 | 6.42171 |
| 642  | 15 | 0.028645 | 0 | 6.59337 |
| 978  | 26 | 0.013815 | 0 | 9.02006 |
| 856  | 24 | 0.039044 | 0 | 5.82358 |
| 1092 | 30 | 0.029096 | 0 | 6.5572  |
| 938  | 23 | 0.048737 | 0 | 5.30534 |
| 372  | 11 | 0.031453 | 0 | 6.35294 |
| 840  | 24 | 0.033077 | 0 | 6.22553 |
| 840  | 24 | 0.033077 | 0 | 6.22553 |
| 1044 | 23 | 0.019677 | 0 | 7.75982 |
| 1061 | 27 | 0.035663 | 0 | 6.04331 |
| 719  | 20 | 0.045939 | 0 | 5.43941 |
| 652  | 18 | 0.048913 | 0 | 5.2969  |
| 848  | 21 | 0.03388  | 0 | 6.16427 |

|      |    |          |     |         |
|------|----|----------|-----|---------|
| 891  | 17 | 0.029352 | 0   | 6.53196 |
| 821  | 16 | 0.01724  | 0   | 8.18317 |
| 619  | 10 | 0.042019 | 0   | 5.65219 |
| 698  | 14 | 0.003884 | 0   | 16.0674 |
| 620  | 18 | 0.049443 | 0   | 5.27536 |
| 634  | 18 | 0.048401 | 0   | 5.32459 |
| 613  | 14 | 0.047033 | 0   | 5.38379 |
| 613  | 14 | 0.047033 | 0   | 5.38379 |
| 628  | 18 | 0.040386 | 0   | 5.73571 |
| 634  | 17 | 0.034931 | 0   | 6.09807 |
| 916  | 21 | 0.035707 | 0   | 6.04003 |
| 732  | 16 | 0.02959  | 0   | 6.51485 |
| 774  | 20 | 0.048958 | 0   | 5.2949  |
| 712  | 15 | 0.047881 | 0   | 5.34685 |
| 649  | 18 | 0.044358 | 0   | 5.51966 |
| 1030 | 29 | 0.016649 | 0   | 8.30825 |
| 753  | 17 | 0.020197 | 0.5 | 7.65686 |
| 753  | 17 | 0.020197 | 0.5 | 7.65686 |
| 640  | 16 | 0.035213 | 0   | 6.07105 |
| 653  | 19 | 0.049814 | 0   | 5.25645 |
| 630  | 18 | 0.040668 | 0   | 5.71826 |
| 964  | 21 | 0.019209 | 0   | 7.83358 |
| 949  | 27 | 0.024452 | 0   | 7.06312 |
| 595  | 17 | 0.041295 | 0   | 5.68381 |
| 689  | 19 | 0.034445 | 0   | 6.13219 |
| 744  | 17 | 0.033174 | 0   | 6.21399 |
| 959  | 27 | 0.017752 | 0   | 8.09248 |
| 867  | 23 | 0.02906  | 0   | 6.56149 |
| 616  | 13 | 0.034092 | 0   | 6.15296 |
| 715  | 16 | 0.031788 | 0   | 6.32464 |
| 667  | 19 | 0.039318 | 0   | 5.80383 |
| 930  | 24 | 0.043228 | 0   | 5.57444 |
| 832  | 24 | 0.044199 | 0   | 5.52738 |
| 591  | 17 | 0.044138 | 0   | 5.53041 |
| 662  | 19 | 0.043864 | 0   | 5.54611 |
| 1108 | 24 | 0.020674 | 0   | 7.59603 |
| 1175 | 33 | 0.035663 | 0   | 6.04437 |
| 557  | 13 | 0.0326   | 0   | 6.26171 |
| 1069 | 26 | 0.032062 | 0   | 6.30083 |
| 595  | 17 | 0.045771 | 0   | 5.44717 |
| 1309 | 37 | 0.020771 | 0   | 7.58652 |
| 611  | 18 | 0.047713 | 0   | 5.35601 |
| 688  | 19 | 0.00437  | 0   | 15.0282 |
| 663  | 17 | 0.035019 | 0   | 6.08876 |
| 753  | 18 | 0.044297 | 0   | 5.52317 |
| 637  | 17 | 0.048463 | 0   | 5.32037 |
| 735  | 18 | 0.024514 | 0   | 7.05686 |

|      |    |          |   |         |
|------|----|----------|---|---------|
| 627  | 18 | 0.046724 | 0 | 5.39708 |
| 939  | 27 | 0.029925 | 0 | 6.48555 |
| 652  | 18 | 0.043467 | 0 | 5.5611  |
| 601  | 17 | 0.046971 | 0 | 5.38675 |
| 615  | 18 | 0.038974 | 0 | 5.82701 |
| 600  | 17 | 0.043326 | 0 | 5.56734 |
| 880  | 25 | 0.027745 | 0 | 6.68294 |
| 629  | 18 | 0.023764 | 0 | 7.14426 |
| 629  | 18 | 0.023764 | 0 | 7.14426 |
| 778  | 21 | 0.03561  | 0 | 6.04958 |
| 1074 | 30 | 0.027718 | 0 | 6.68549 |
| 740  | 16 | 0.048304 | 0 | 5.32803 |
| 1093 | 26 | 0.021371 | 0 | 7.48681 |
| 1093 | 26 | 0.021371 | 0 | 7.48681 |
| 844  | 24 | 0.042787 | 0 | 5.60183 |
| 775  | 22 | 0.035222 | 0 | 6.07036 |
| 703  | 14 | 0.026421 | 0 | 6.83167 |
| 616  | 18 | 0.045462 | 0 | 5.46336 |
| 691  | 17 | 0.032079 | 0 | 6.29789 |
| 604  | 17 | 0.048031 | 0 | 5.33963 |
| 604  | 17 | 0.048031 | 0 | 5.33963 |
| 660  | 18 | 0.045665 | 0 | 5.45202 |
| 747  | 20 | 0.022387 | 0 | 7.3342  |
| 849  | 24 | 0.035142 | 0 | 6.07761 |
| 714  | 16 | 0.023128 | 0 | 7.23357 |
| 617  | 13 | 0.036246 | 0 | 6.00265 |
| 691  | 19 | 0.022087 | 0 | 7.37775 |
| 857  | 23 | 0.013427 | 0 | 9.14294 |
| 556  | 16 | 0.035319 | 0 | 6.06553 |
| 556  | 16 | 0.035319 | 0 | 6.06553 |
| 896  | 21 | 0.015166 | 0 | 8.63811 |
| 620  | 18 | 0.03682  | 0 | 5.96201 |
| 613  | 17 | 0.040748 | 0 | 5.71259 |
| 610  | 14 | 0.038594 | 0 | 5.84941 |
| 583  | 17 | 0.047607 | 0 | 5.36207 |
| 709  | 20 | 0.029299 | 0 | 6.53753 |
| 610  | 12 | 0.046089 | 0 | 5.43081 |
| 595  | 13 | 0.040165 | 0 | 5.75094 |
| 589  | 14 | 0.048754 | 0 | 5.30411 |
| 619  | 16 | 0.044358 | 0 | 5.51991 |
| 843  | 24 | 0.03147  | 0 | 6.35154 |
| 596  | 13 | 0.044191 | 0 | 5.52775 |
| 589  | 17 | 0.049699 | 0 | 5.26332 |
| 667  | 19 | 0.029122 | 0 | 6.5551  |
| 1146 | 32 | 0.029193 | 0 | 6.54704 |
| 1030 | 22 | 0.022925 | 0 | 7.26027 |
| 616  | 17 | 0.048287 | 0 | 5.32878 |

|      |    |          |   |         |
|------|----|----------|---|---------|
| 606  | 17 | 0.030782 | 0 | 6.40772 |
| 427  | 12 | 0.044058 | 0 | 5.53509 |
| 866  | 23 | 0.023781 | 0 | 7.14105 |
| 460  | 12 | 0.043246 | 0 | 5.57168 |
| 594  | 17 | 0.048031 | 0 | 5.33946 |
| 799  | 22 | 0.048463 | 0 | 5.32059 |
| 795  | 22 | 0.049567 | 0 | 5.27035 |
| 630  | 17 | 0.040324 | 0 | 5.73905 |
| 653  | 16 | 0.039336 | 0 | 5.79971 |
| 988  | 22 | 0.024064 | 0 | 7.10326 |
| 603  | 17 | 0.038241 | 0 | 5.86842 |
| 593  | 14 | 0.033297 | 0 | 6.20455 |
| 645  | 18 | 0.049752 | 0 | 5.25926 |
| 622  | 18 | 0.047519 | 0 | 5.36556 |
| 426  | 11 | 0.048287 | 0 | 5.32875 |
| 685  | 20 | 0.049752 | 0 | 5.26021 |
| 590  | 15 | 0.045788 | 0 | 5.4454  |
| 587  | 16 | 0.047713 | 0 | 5.35589 |
| 747  | 18 | 0.048207 | 0 | 5.33129 |
| 1323 | 32 | 0.010372 | 0 | 10.2698 |
| 650  | 18 | 0.041189 | 0 | 5.68804 |
| 589  | 12 | 0.048596 | 0 | 5.31359 |
| 1059 | 22 | 0.013736 | 0 | 9.05525 |
| 829  | 16 | 0.024187 | 0 | 7.09451 |
| 600  | 15 | 0.03569  | 0 | 6.04211 |
| 714  | 20 | 0.046583 | 0 | 5.40164 |
| 831  | 20 | 0.009957 | 0 | 10.4374 |
| 534  | 10 | 0.048587 | 0 | 5.31473 |
| 780  | 20 | 0.029978 | 0 | 6.47664 |
| 3255 | 67 | 0.016304 | 0 | 8.37382 |
| 598  | 17 | 0.049999 | 0 | 5.24786 |
| 584  | 12 | 0.044138 | 0 | 5.5306  |
| 705  | 20 | 0.033439 | 0 | 6.19074 |
| 617  | 16 | 0.034586 | 0 | 6.12007 |
| 588  | 10 | 0.043264 | 0 | 5.57119 |
| 816  | 23 | 0.022793 | 0 | 7.28973 |
| 915  | 26 | 0.026474 | 0 | 6.82656 |
| 760  | 16 | 0.034683 | 0 | 6.11454 |
| 985  | 24 | 0.008201 | 0 | 11.4809 |
| 630  | 15 | 0.030932 | 0 | 6.39542 |
| 588  | 17 | 0.041648 | 0 | 5.67022 |
| 729  | 17 | 0.031894 | 0 | 6.31571 |
| 608  | 17 | 0.047678 | 0 | 5.35875 |
| 491  | 14 | 0.045877 | 0 | 5.44229 |
| 593  | 10 | 0.048799 | 0 | 5.30238 |
| 1010 | 22 | 0.006321 | 0 | 12.9107 |
| 822  | 21 | 0.023358 | 0 | 7.20337 |

|      |    |          |   |         |
|------|----|----------|---|---------|
| 822  | 21 | 0.023358 | 0 | 7.20337 |
| 783  | 22 | 0.020162 | 0 | 7.66005 |
| 920  | 26 | 0.021857 | 0 | 7.40487 |
| 782  | 22 | 0.01077  | 0 | 10.1089 |
| 615  | 17 | 0.048587 | 0 | 5.31702 |
| 615  | 17 | 0.048587 | 0 | 5.31702 |
| 741  | 19 | 0.032009 | 0 | 6.30525 |
| 741  | 19 | 0.032009 | 0 | 6.30525 |
| 923  | 22 | 0.015589 | 0 | 8.52111 |
| 664  | 19 | 0.046874 | 0 | 5.39012 |
| 831  | 23 | 0.034639 | 0 | 6.11688 |
| 509  | 15 | 0.032741 | 0 | 6.25347 |
| 690  | 20 | 0.04465  | 0 | 5.50315 |
| 948  | 25 | 0.016331 | 0 | 8.36875 |
| 634  | 18 | 0.035999 | 0 | 6.02031 |
| 610  | 18 | 0.046768 | 0 | 5.39575 |
| 789  | 22 | 0.035884 | 0 | 6.02985 |
| 789  | 22 | 0.035884 | 0 | 6.02985 |
| 859  | 21 | 0.011723 | 0 | 9.72357 |
| 859  | 21 | 0.011723 | 0 | 9.72357 |
| 988  | 27 | 0.031223 | 0 | 6.36896 |
| 1096 | 31 | 0.024532 | 0 | 7.05463 |
| 1253 | 34 | 0.017752 | 0 | 8.09117 |
| 986  | 28 | 0.036246 | 0 | 6.00311 |
| 886  | 25 | 0.036246 | 0 | 6.00225 |
| 615  | 12 | 0.049425 | 0 | 5.27632 |
| 723  | 20 | 0.024903 | 0 | 7.01574 |
| 736  | 21 | 0.035142 | 0 | 6.0761  |
| 597  | 17 | 0.038929 | 0 | 5.83018 |
| 631  | 18 | 0.039071 | 0 | 5.82206 |
| 854  | 23 | 0.044976 | 0 | 5.48858 |
| 655  | 16 | 0.024346 | 0 | 7.07194 |
| 638  | 18 | 0.027807 | 0 | 6.67797 |
| 609  | 17 | 0.043123 | 0 | 5.5823  |
| 609  | 17 | 0.043123 | 0 | 5.5823  |
| 719  | 14 | 0.019888 | 0 | 7.71875 |
| 549  | 15 | 0.043935 | 0 | 5.54212 |
| 412  | 12 | 0.047881 | 0 | 5.34657 |
| 739  | 14 | 0.024002 | 0 | 7.112   |
| 682  | 19 | 0.034586 | 0 | 6.12031 |
| 677  | 19 | 0.031117 | 0 | 6.37694 |
| 639  | 16 | 0.024779 | 0 | 7.02927 |
| 624  | 13 | 0.03418  | 0 | 6.14423 |
| 1170 | 28 | 0.007221 | 0 | 12.1338 |
| 530  | 15 | 0.049514 | 0 | 5.27286 |
| 633  | 13 | 0.028319 | 0 | 6.61672 |
| 649  | 16 | 0.03923  | 0 | 5.80888 |

|      |    |          |   |         |
|------|----|----------|---|---------|
| 632  | 18 | 0.048728 | 0 | 5.30662 |
| 675  | 18 | 0.026085 | 0 | 6.87511 |
| 615  | 17 | 0.048763 | 0 | 5.30304 |
| 1131 | 26 | 0.030552 | 0 | 6.42549 |
| 607  | 17 | 0.049205 | 0 | 5.28682 |
| 560  | 12 | 0.045179 | 0 | 5.47997 |
| 790  | 22 | 0.031797 | 0 | 6.3239  |
| 897  | 23 | 0.013541 | 0 | 9.11288 |
| 645  | 11 | 0.033183 | 0 | 6.21373 |
| 822  | 16 | 0.023464 | 0 | 7.18755 |
| 695  | 20 | 0.031488 | 0 | 6.35115 |
| 565  | 16 | 0.031682 | 0 | 6.33184 |
| 743  | 21 | 0.048878 | 0 | 5.29906 |
| 948  | 27 | 0.016154 | 0 | 8.40656 |
| 991  | 23 | 0.013241 | 0 | 9.20972 |
| 672  | 19 | 0.03524  | 0 | 6.06855 |
| 600  | 17 | 0.042531 | 0 | 5.62222 |
| 787  | 20 | 0.023137 | 0 | 7.23054 |
| 798  | 18 | 0.04984  | 0 | 5.25547 |
| 1015 | 27 | 0.029237 | 0 | 6.54412 |
| 658  | 19 | 0.038506 | 0 | 5.85678 |
| 705  | 17 | 0.026412 | 0 | 6.83407 |
| 858  | 23 | 0.021513 | 0 | 7.46545 |
| 631  | 18 | 0.045241 | 0 | 5.47517 |
| 728  | 20 | 0.022793 | 0 | 7.29109 |
| 728  | 20 | 0.022793 | 0 | 7.29109 |
| 617  | 18 | 0.049796 | 0 | 5.25743 |
| 584  | 16 | 0.045718 | 0 | 5.44884 |
| 584  | 16 | 0.045718 | 0 | 5.44884 |
| 706  | 20 | 0.031982 | 0 | 6.30668 |
| 591  | 15 | 0.024567 | 0 | 7.05045 |
| 662  | 18 | 0.044976 | 0 | 5.48806 |
| 516  | 15 | 0.031117 | 0 | 6.37619 |
| 614  | 15 | 0.042822 | 0 | 5.60028 |
| 837  | 18 | 0.034577 | 0 | 6.12131 |
| 848  | 20 | 0.034277 | 0 | 6.13998 |
| 598  | 17 | 0.041675 | 0 | 5.66919 |
| 598  | 17 | 0.041675 | 0 | 5.66919 |
| 866  | 17 | 0.027551 | 0 | 6.70227 |
| 598  | 16 | 0.041895 | 0 | 5.65624 |
| 1090 | 31 | 0.018123 | 0 | 8.04039 |
| 633  | 18 | 0.039812 | 0 | 5.77269 |
| 744  | 18 | 0.018044 | 0 | 8.05035 |
| 940  | 19 | 0.01257  | 0 | 9.44535 |
| 1064 | 24 | 0.007336 | 0 | 12.0303 |
| 712  | 14 | 0.035425 | 0 | 6.05955 |
| 996  | 27 | 0.024947 | 0 | 7.01223 |

|      |    |          |   |         |
|------|----|----------|---|---------|
| 583  | 12 | 0.042796 | 0 | 5.60099 |
| 360  | 10 | 0.022263 | 0 | 7.35396 |
| 646  | 16 | 0.039486 | 0 | 5.79454 |
| 844  | 20 | 0.022122 | 0 | 7.37348 |
| 631  | 12 | 0.042478 | 0 | 5.62655 |
| 631  | 12 | 0.042478 | 0 | 5.62655 |
| 1050 | 30 | 0.04879  | 0 | 5.30249 |
| 853  | 24 | 0.030499 | 0 | 6.42937 |
| 641  | 17 | 0.048331 | 0 | 5.32659 |
| 1067 | 29 | 0.020665 | 0 | 7.59971 |
| 891  | 18 | 0.022863 | 0 | 7.27421 |
| 600  | 17 | 0.045206 | 0 | 5.47745 |
| 753  | 21 | 0.049937 | 0 | 5.24958 |
| 672  | 18 | 0.03591  | 0 | 6.02402 |
| 763  | 21 | 0.048737 | 0 | 5.30566 |
| 553  | 10 | 0.043202 | 0 | 5.57702 |
| 874  | 24 | 0.013056 | 0 | 9.28143 |
| 619  | 11 | 0.044817 | 0 | 5.4963  |
| 630  | 16 | 0.049893 | 0 | 5.2525  |
| 605  | 17 | 0.04984  | 0 | 5.25563 |
| 615  | 18 | 0.032397 | 0 | 6.27354 |
| 632  | 16 | 0.040139 | 0 | 5.75331 |
| 955  | 25 | 0.029634 | 0 | 6.51251 |
| 855  | 20 | 0.023658 | 0 | 7.16023 |
| 876  | 23 | 0.043352 | 0 | 5.56442 |
| 1031 | 25 | 0.023058 | 0 | 7.24507 |
| 666  | 36 | 0.048569 | 0 | 5.31724 |
| 834  | 24 | 0.022907 | 0 | 7.26295 |
| 764  | 21 | 0.029828 | 0 | 6.49481 |
| 670  | 18 | 0.028734 | 0 | 6.58705 |
| 809  | 22 | 0.024744 | 0 | 7.03215 |
| 1051 | 30 | 0.021186 | 0 | 7.51822 |
| 727  | 15 | 0.047563 | 0 | 5.36444 |
| 796  | 22 | 0.04563  | 0 | 5.4563  |
| 854  | 20 | 0.028098 | 0 | 6.64355 |
| 747  | 21 | 0.035937 | 0 | 6.02201 |
| 660  | 19 | 0.030243 | 0 | 6.45184 |
| 608  | 17 | 0.042964 | 0 | 5.59112 |
| 451  | 13 | 0.042867 | 0 | 5.59781 |
| 666  | 19 | 0.034339 | 0 | 6.13639 |
| 741  | 21 | 0.0262   | 0 | 6.85791 |
| 741  | 21 | 0.0262   | 0 | 6.85791 |
| 620  | 14 | 0.042681 | 0 | 5.60729 |
| 617  | 18 | 0.04743  | 0 | 5.36897 |
| 1136 | 32 | 0.00986  | 0 | 10.4962 |
| 857  | 18 | 0.049699 | 0 | 5.26347 |
| 380  | 11 | 0.049567 | 0 | 5.27133 |



|      |    |          |   |         |
|------|----|----------|---|---------|
| 605  | 15 | 0.039124 | 0 | 5.8205  |
| 874  | 19 | 0.034092 | 0 | 6.15331 |
| 659  | 15 | 0.049355 | 0 | 5.27877 |
| 682  | 17 | 0.042134 | 0 | 5.64758 |
| 730  | 17 | 0.044923 | 0 | 5.49046 |
| 669  | 19 | 0.049443 | 0 | 5.27557 |
| 792  | 22 | 0.035142 | 0 | 6.07614 |
| 614  | 17 | 0.041366 | 0 | 5.68137 |
| 611  | 17 | 0.047836 | 0 | 5.34918 |
| 622  | 18 | 0.040801 | 0 | 5.70982 |
| 1088 | 30 | 0.018997 | 0 | 7.8792  |
| 506  | 14 | 0.034922 | 0 | 6.09894 |
| 638  | 18 | 0.031567 | 0 | 6.34267 |
| 517  | 12 | 0.047695 | 0 | 5.35691 |
| 684  | 19 | 0.042187 | 0 | 5.64424 |
| 598  | 17 | 0.047942 | 0 | 5.34368 |
| 639  | 18 | 0.006656 | 0 | 12.598  |
| 590  | 17 | 0.049214 | 0 | 5.28555 |
| 617  | 17 | 0.044756 | 0 | 5.49832 |
| 585  | 15 | 0.032062 | 0 | 6.30063 |
| 679  | 17 | 0.017735 | 0 | 8.09445 |
| 1187 | 33 | 0.023587 | 0 | 7.17258 |
| 1149 | 31 | 0.027365 | 0 | 6.72661 |
| 456  | 13 | 0.036122 | 0 | 6.01103 |
| 598  | 15 | 0.045541 | 0 | 5.46067 |
| 1025 | 29 | 0.033315 | 0 | 6.20027 |
| 598  | 12 | 0.04359  | 0 | 5.55507 |
| 856  | 22 | 0.034092 | 0 | 6.15351 |
| 811  | 18 | 0.031753 | 0 | 6.32693 |
| 782  | 15 | 0.021433 | 0 | 7.47439 |
| 786  | 21 | 0.005164 | 0 | 14.0952 |
| 763  | 21 | 0.030411 | 0 | 6.43641 |
| 1117 | 23 | 0.008192 | 0 | 11.5079 |
| 841  | 23 | 0.026412 | 0 | 6.83439 |
| 982  | 25 | 0.024346 | 0 | 7.07111 |
| 794  | 23 | 0.042663 | 0 | 5.60964 |
| 703  | 20 | 0.039503 | 0 | 5.79418 |
| 618  | 16 | 0.043979 | 0 | 5.53859 |
| 738  | 21 | 0.023949 | 0 | 7.12315 |
| 1116 | 27 | 0.024099 | 0 | 7.10041 |
| 1042 | 24 | 0.017055 | 0 | 8.22055 |
| 595  | 14 | 0.038982 | 0 | 5.82649 |
| 975  | 27 | 0.023349 | 0 | 7.20452 |
| 600  | 13 | 0.040174 | 0 | 5.75054 |
| 688  | 19 | 0.040518 | 0 | 5.72921 |
| 696  | 16 | 0.035707 | 0 | 6.03953 |
| 892  | 25 | 0.032565 | 0 | 6.26551 |

|      |    |          |   |         |
|------|----|----------|---|---------|
| 676  | 19 | 0.04179  | 0 | 5.66151 |
| 982  | 22 | 0.032724 | 0 | 6.25542 |
| 582  | 17 | 0.049231 | 0 | 5.28524 |
| 641  | 15 | 0.031099 | 0 | 6.37898 |
| 612  | 16 | 0.041216 | 0 | 5.68628 |
| 603  | 12 | 0.048772 | 0 | 5.30282 |
| 794  | 23 | 0.024903 | 0 | 7.01672 |
| 659  | 13 | 0.035531 | 0 | 6.05692 |
| 463  | 11 | 0.045603 | 0 | 5.45723 |
| 605  | 16 | 0.04593  | 0 | 5.43957 |
| 974  | 20 | 0.017311 | 0 | 8.17442 |
| 725  | 21 | 0.035134 | 0 | 6.07791 |
| 698  | 19 | 0.047236 | 0 | 5.37642 |
| 840  | 19 | 0.035893 | 0 | 6.02705 |
| 624  | 18 | 0.046327 | 0 | 5.41485 |
| 640  | 18 | 0.048799 | 0 | 5.30205 |
| 821  | 23 | 0.008183 | 0 | 11.5149 |
| 776  | 22 | 0.028946 | 0 | 6.56876 |
| 592  | 16 | 0.049337 | 0 | 5.28081 |
| 592  | 16 | 0.049337 | 0 | 5.28081 |
| 1184 | 33 | 0.012517 | 0 | 9.46444 |
| 544  | 12 | 0.044147 | 0 | 5.5293  |
| 611  | 12 | 0.049876 | 0 | 5.25293 |
| 656  | 12 | 0.045612 | 0 | 5.45698 |
| 650  | 13 | 0.031329 | 0 | 6.362   |
| 625  | 15 | 0.042628 | 0 | 5.61369 |
| 992  | 28 | 0.027869 | 0 | 6.66547 |
| 729  | 15 | 0.032238 | 0 | 6.28371 |
| 598  | 15 | 0.045647 | 0 | 5.45297 |
| 593  | 15 | 0.039803 | 0 | 5.77344 |
| 663  | 16 | 0.020983 | 0 | 7.54866 |
| 1180 | 26 | 0.01062  | 0 | 10.1714 |
| 932  | 26 | 0.018035 | 0 | 8.05135 |
| 719  | 20 | 0.045577 | 0 | 5.45881 |
| 686  | 19 | 0.047422 | 0 | 5.37037 |
| 688  | 13 | 0.03576  | 0 | 6.03697 |
| 602  | 17 | 0.04352  | 0 | 5.55885 |
| 658  | 14 | 0.048596 | 0 | 5.31444 |
| 674  | 19 | 0.039848 | 0 | 5.77084 |
| 782  | 20 | 0.031947 | 0 | 6.31237 |
| 1073 | 30 | 0.015113 | 0 | 8.65584 |
| 837  | 20 | 0.031611 | 0 | 6.33789 |
| 604  | 14 | 0.049628 | 0 | 5.26646 |
| 601  | 17 | 0.039909 | 0 | 5.76421 |
| 709  | 16 | 0.034154 | 0 | 6.14645 |
| 645  | 17 | 0.030331 | 0 | 6.44265 |
| 901  | 25 | 0.029925 | 0 | 6.48676 |

|      |    |          |   |         |
|------|----|----------|---|---------|
| 965  | 17 | 0.018008 | 0 | 8.05495 |
| 922  | 25 | 0.043661 | 0 | 5.55304 |
| 724  | 20 | 0.049699 | 0 | 5.26363 |
| 703  | 20 | 0.044941 | 0 | 5.4895  |
| 959  | 27 | 0.021186 | 0 | 7.51938 |
| 1344 | 36 | 0.010575 | 0 | 10.1831 |
| 686  | 18 | 0.03019  | 0 | 6.45553 |
| 1062 | 30 | 0.024523 | 0 | 7.05519 |
| 520  | 15 | 0.048145 | 0 | 5.33314 |
| 1638 | 43 | 0.018273 | 0 | 8.01024 |
| 606  | 17 | 0.044297 | 0 | 5.52338 |
| 1155 | 26 | 0.01363  | 0 | 9.07911 |
| 702  | 16 | 0.034648 | 0 | 6.11658 |
| 990  | 25 | 0.017629 | 0 | 8.11381 |
| 617  | 16 | 0.046097 | 0 | 5.43026 |
| 1047 | 28 | 0.024699 | 0 | 7.03657 |
| 903  | 25 | 0.043935 | 0 | 5.54176 |
| 878  | 25 | 0.021778 | 0 | 7.41685 |
| 1113 | 31 | 0.030561 | 0 | 6.42407 |
| 793  | 17 | 0.027551 | 0 | 6.7008  |
| 686  | 16 | 0.046556 | 0 | 5.40257 |
| 844  | 24 | 0.029996 | 0 | 6.47573 |
| 844  | 24 | 0.029996 | 0 | 6.47573 |
| 908  | 19 | 0.031373 | 0 | 6.35774 |
| 1962 | 42 | 0.018017 | 0 | 8.05419 |
| 877  | 24 | 0.032353 | 0 | 6.27639 |
| 859  | 18 | 0.029175 | 0 | 6.54912 |
| 612  | 17 | 0.046857 | 0 | 5.39132 |
| 775  | 18 | 0.049514 | 0 | 5.27281 |
| 837  | 23 | 0.034348 | 0 | 6.13611 |
| 769  | 22 | 0.031735 | 0 | 6.32946 |
| 381  | 11 | 0.042708 | 0 | 5.6049  |
| 831  | 19 | 0.022466 | 0 | 7.32568 |
| 597  | 17 | 0.042875 | 0 | 5.5975  |
| 1008 | 27 | 0.012606 | 0 | 9.42261 |
| 597  | 16 | 0.048048 | 0 | 5.33836 |
| 770  | 22 | 0.030994 | 0 | 6.38626 |
| 639  | 18 | 0.023993 | 0 | 7.11336 |
| 693  | 20 | 0.048754 | 0 | 5.30377 |
| 651  | 18 | 0.036493 | 0 | 5.9912  |
| 651  | 18 | 0.036493 | 0 | 5.9912  |
| 649  | 11 | 0.035019 | 0 | 6.08857 |
| 826  | 23 | 0.024338 | 0 | 7.07554 |
| 986  | 23 | 0.010999 | 0 | 10.0153 |
| 1089 | 21 | 0.016931 | 0 | 8.24231 |
| 619  | 14 | 0.046424 | 0 | 5.41056 |
| 637  | 15 | 0.049214 | 0 | 5.28638 |

|      |    |          |       |         |
|------|----|----------|-------|---------|
| 616  | 13 | 0.048525 | 0     | 5.31938 |
| 620  | 16 | 0.04947  | 0     | 5.27454 |
| 1053 | 29 | 0.017143 | 0     | 8.20196 |
| 790  | 22 | 0.042602 | 0     | 5.61538 |
| 786  | 22 | 0.020083 | 0     | 7.68761 |
| 1195 | 31 | 0.023976 | 0     | 7.11756 |
| 519  | 14 | 0.023852 | 0     | 7.1327  |
| 595  | 17 | 0.047713 | 0     | 5.35553 |
| 610  | 15 | 0.047757 | 0     | 5.35378 |
| 584  | 15 | 0.04412  | 0     | 5.53102 |
| 466  | 14 | 0.045285 | 0     | 5.47047 |
| 653  | 19 | 0.049567 | 0     | 5.27087 |
| 591  | 17 | 0.044358 | 0     | 5.51899 |
| 575  | 13 | 0.047863 | 0     | 5.34768 |
| 1158 | 33 | 0.013806 | 0     | 9.02757 |
| 626  | 18 | 0.048216 | 0     | 5.33082 |
| 645  | 17 | 0.045965 | 0     | 5.43694 |
| 559  | 11 | 0.041922 | 0     | 5.65558 |
| 821  | 22 | 0.031647 | 0     | 6.33468 |
| 609  | 17 | 0.04984  | 0     | 5.25452 |
| 700  | 20 | 0.031867 | 0     | 6.31777 |
| 586  | 17 | 0.037446 | 0     | 5.9181  |
| 669  | 19 | 0.033165 | 0     | 6.21566 |
| 759  | 22 | 0.047633 | 0     | 5.36049 |
| 611  | 17 | 0.047015 | 0     | 5.38528 |
| 597  | 13 | 0.02394  | 0     | 7.12384 |
| 1325 | 32 | 0.02417  | 0.125 | 7.09619 |
| 1325 | 32 | 0.02417  | 0.125 | 7.09619 |
| 421  | 12 | 0.03524  | 0     | 6.06883 |
| 620  | 14 | 0.04728  | 0     | 5.37525 |
| 595  | 13 | 0.045638 | 0     | 5.45429 |
| 601  | 12 | 0.04947  | 0     | 5.27454 |
| 595  | 16 | 0.046    | 0     | 5.43404 |
| 727  | 16 | 0.042196 | 0     | 5.64405 |
| 1282 | 36 | 0.014354 | 0     | 8.88373 |
| 616  | 10 | 0.043149 | 0     | 5.58092 |
| 687  | 19 | 0.046203 | 0     | 5.42084 |
| 1023 | 23 | 0.021557 | 0     | 7.4554  |
| 723  | 20 | 0.047377 | 0     | 5.37213 |
| 668  | 19 | 0.049752 | 0     | 5.25997 |
| 685  | 19 | 0.047678 | 0     | 5.35896 |
| 687  | 18 | 0.048666 | 0     | 5.30927 |
| 619  | 15 | 0.036025 | 0     | 6.01767 |
| 612  | 13 | 0.04254  | 0     | 5.61764 |
| 612  | 13 | 0.04254  | 0     | 5.61764 |
| 1574 | 39 | 0.005694 | 0     | 13.5493 |
| 750  | 21 | 0.018202 | 0     | 8.02448 |

|      |    |          |   |         |
|------|----|----------|---|---------|
| 1719 | 40 | 0.008686 | 0 | 11.1807 |
| 886  | 25 | 0.021725 | 0 | 7.42695 |
| 936  | 26 | 0.038921 | 0 | 5.83074 |
| 673  | 19 | 0.039336 | 0 | 5.80007 |
| 1111 | 30 | 0.021469 | 0 | 7.47044 |
| 530  | 15 | 0.047916 | 0 | 5.34577 |
| 636  | 18 | 0.040068 | 0 | 5.75751 |
| 706  | 19 | 0.042681 | 0 | 5.60729 |
| 595  | 17 | 0.048048 | 0 | 5.33741 |
| 695  | 20 | 0.036034 | 0 | 6.01665 |
| 909  | 26 | 0.016605 | 0 | 8.31179 |
| 623  | 11 | 0.047607 | 0 | 5.36221 |
| 751  | 19 | 0.030411 | 0 | 6.43506 |
| 1020 | 24 | 0.023737 | 0 | 7.14718 |
| 680  | 15 | 0.041136 | 0 | 5.69166 |
| 723  | 20 | 0.037208 | 0 | 5.9357  |
| 618  | 17 | 0.049284 | 0 | 5.28334 |
| 675  | 18 | 0.033174 | 0 | 6.21442 |
| 565  | 16 | 0.044482 | 0 | 5.51198 |
| 804  | 21 | 0.035566 | 0 | 6.05432 |
| 519  | 15 | 0.033024 | 0 | 6.23105 |
| 915  | 24 | 0.021407 | 0 | 7.48148 |
| 612  | 15 | 0.044526 | 0 | 5.50876 |
| 722  | 17 | 0.033395 | 0 | 6.19431 |
| 649  | 12 | 0.036069 | 0 | 6.01526 |
| 658  | 18 | 0.047316 | 0 | 5.37408 |
| 615  | 15 | 0.047757 | 0 | 5.35353 |
| 666  | 19 | 0.036122 | 0 | 6.0101  |
| 1119 | 31 | 0.024099 | 0 | 7.1006  |
| 630  | 16 | 0.044358 | 0 | 5.52079 |
| 593  | 16 | 0.043175 | 0 | 5.57938 |
| 952  | 23 | 0.02462  | 0 | 7.04439 |
| 790  | 21 | 0.033033 | 0 | 6.22961 |
| 891  | 21 | 0.013692 | 0 | 9.07077 |
| 888  | 25 | 0.023058 | 0 | 7.24456 |
| 743  | 16 | 0.034092 | 0 | 6.15297 |
| 617  | 14 | 0.049655 | 0 | 5.26529 |
| 1097 | 31 | 0.024611 | 0 | 7.04594 |
| 660  | 18 | 0.031117 | 0 | 6.37652 |
| 1123 | 28 | 0.013453 | 0 | 9.12434 |
| 611  | 17 | 0.046548 | 0 | 5.403   |
| 653  | 17 | 0.045894 | 0 | 5.4413  |
| 618  | 18 | 0.042867 | 0 | 5.59883 |
| 826  | 23 | 0.010964 | 0 | 10.0295 |
| 655  | 15 | 0.047042 | 0 | 5.38245 |
| 706  | 15 | 0.046565 | 0 | 5.40226 |
| 849  | 20 | 0.022687 | 0 | 7.30292 |

|      |    |          |   |         |
|------|----|----------|---|---------|
| 622  | 15 | 0.033315 | 0 | 6.20328 |
| 598  | 17 | 0.038453 | 0 | 5.86023 |
| 596  | 13 | 0.04751  | 0 | 5.36618 |
| 497  | 14 | 0.048551 | 0 | 5.31834 |
| 484  | 14 | 0.03396  | 0 | 6.16236 |
| 895  | 26 | 0.049602 | 0 | 5.26729 |
| 587  | 17 | 0.048666 | 0 | 5.31061 |
| 831  | 15 | 0.018935 | 0 | 7.88479 |
| 939  | 26 | 0.014106 | 0 | 8.96024 |
| 823  | 19 | 0.021239 | 0 | 7.50783 |
| 1500 | 38 | 0.048719 | 0 | 5.3078  |
| 741  | 21 | 0.04284  | 0 | 5.59958 |
| 675  | 15 | 0.045453 | 0 | 5.46343 |
| 618  | 14 | 0.046742 | 0 | 5.39644 |
| 586  | 17 | 0.044464 | 0 | 5.51385 |
| 1122 | 30 | 0.013241 | 0 | 9.2015  |
| 640  | 15 | 0.045983 | 0 | 5.43532 |
| 793  | 22 | 0.018026 | 0 | 8.05237 |
| 645  | 19 | 0.009728 | 0 | 10.5964 |
| 618  | 15 | 0.045126 | 0 | 5.48322 |
| 683  | 18 | 0.026721 | 0 | 6.79198 |
| 979  | 25 | 0.034719 | 0 | 6.11041 |
| 801  | 15 | 0.047298 | 0 | 5.37482 |
| 602  | 17 | 0.04992  | 0 | 5.25095 |
| 1036 | 19 | 0.02424  | 0 | 7.08926 |
| 1036 | 19 | 0.02424  | 0 | 7.08926 |
| 1040 | 26 | 0.016172 | 0 | 8.39668 |
| 678  | 15 | 0.045365 | 0 | 5.46713 |
| 825  | 20 | 0.033854 | 0 | 6.16658 |
| 1007 | 28 | 0.02018  | 0 | 7.65836 |
| 1008 | 28 | 0.021319 | 0 | 7.49396 |
| 675  | 19 | 0.034498 | 0 | 6.12812 |
| 675  | 19 | 0.034498 | 0 | 6.12812 |
| 613  | 13 | 0.029175 | 0 | 6.55102 |
| 727  | 21 | 0.04691  | 0 | 5.38768 |
| 1047 | 27 | 0.02477  | 0 | 7.03076 |
| 824  | 22 | 0.031885 | 0 | 6.31722 |
| 824  | 22 | 0.031885 | 0 | 6.31722 |
| 643  | 17 | 0.033227 | 0 | 6.21037 |
| 1198 | 33 | 0.010849 | 0 | 10.0774 |
| 609  | 16 | 0.045365 | 0 | 5.46792 |
| 702  | 15 | 0.045833 | 0 | 5.44429 |
| 705  | 20 | 0.030331 | 0 | 6.44327 |
| 569  | 16 | 0.049249 | 0 | 5.28435 |
| 410  | 10 | 0.048587 | 0 | 5.31468 |
| 658  | 16 | 0.017735 | 0 | 8.09623 |
| 527  | 14 | 0.045135 | 0 | 5.48246 |

|      |    |          |   |         |
|------|----|----------|---|---------|
| 630  | 18 | 0.032397 | 0 | 6.27437 |
| 1006 | 23 | 0.02756  | 0 | 6.70054 |
| 748  | 21 | 0.033598 | 0 | 6.17775 |
| 642  | 18 | 0.045003 | 0 | 5.48688 |
| 414  | 12 | 0.043802 | 0 | 5.54933 |
| 819  | 22 | 0.009922 | 0 | 10.4659 |
| 1567 | 38 | 0.030596 | 0 | 6.42208 |
| 1347 | 37 | 0.017514 | 0 | 8.13506 |
| 591  | 17 | 0.048454 | 0 | 5.32128 |
| 599  | 17 | 0.024293 | 0 | 7.08163 |
| 1112 | 29 | 0.028063 | 0 | 6.6469  |
| 547  | 11 | 0.042628 | 0 | 5.61369 |
| 599  | 16 | 0.048022 | 0 | 5.34036 |
| 600  | 17 | 0.048807 | 0 | 5.30106 |
| 584  | 10 | 0.03576  | 0 | 6.03617 |
| 645  | 17 | 0.041895 | 0 | 5.65721 |
| 475  | 13 | 0.023993 | 0 | 7.11493 |
| 602  | 17 | 0.04984  | 0 | 5.25517 |
| 1112 | 22 | 0.03862  | 0 | 5.84744 |
| 864  | 23 | 0.028116 | 0 | 6.64037 |
| 587  | 17 | 0.029449 | 0 | 6.5253  |
| 665  | 19 | 0.04171  | 0 | 5.66805 |
| 705  | 20 | 0.023976 | 0 | 7.11809 |
| 600  | 12 | 0.045427 | 0 | 5.46447 |
| 684  | 15 | 0.044976 | 0 | 5.48839 |
| 609  | 12 | 0.033209 | 0 | 6.21274 |
| 578  | 10 | 0.016428 | 0 | 8.34791 |
| 532  | 15 | 0.047686 | 0 | 5.35769 |
| 969  | 17 | 0.032009 | 0 | 6.30467 |
| 969  | 17 | 0.032009 | 0 | 6.30467 |
| 643  | 14 | 0.031567 | 0 | 6.3429  |
| 1018 | 23 | 0.040898 | 0 | 5.70436 |
| 596  | 17 | 0.043352 | 0 | 5.56469 |
| 411  | 12 | 0.049443 | 0 | 5.27538 |
| 617  | 12 | 0.038682 | 0 | 5.8443  |
| 699  | 20 | 0.034975 | 0 | 6.09291 |
| 667  | 16 | 0.048684 | 0 | 5.30858 |
| 718  | 20 | 0.026032 | 0 | 6.88772 |
| 677  | 15 | 0.040201 | 0 | 5.7482  |
| 677  | 15 | 0.040201 | 0 | 5.7482  |
| 638  | 12 | 0.033121 | 0 | 6.2197  |
| 707  | 20 | 0.046839 | 0 | 5.39215 |
| 718  | 21 | 0.029961 | 0 | 6.48198 |
| 627  | 11 | 0.044923 | 0 | 5.49062 |
| 639  | 19 | 0.03659  | 0 | 5.98396 |
| 900  | 25 | 0.035663 | 0 | 6.0444  |
| 836  | 23 | 0.030967 | 0 | 6.38943 |

|      |    |          |   |         |
|------|----|----------|---|---------|
| 968  | 23 | 0.023199 | 0 | 7.22415 |
| 613  | 17 | 0.044261 | 0 | 5.52513 |
| 807  | 21 | 0.036158 | 0 | 6.00695 |
| 558  | 13 | 0.047978 | 0 | 5.34154 |
| 864  | 20 | 0.028954 | 0 | 6.5676  |
| 872  | 25 | 0.036096 | 0 | 6.01356 |
| 957  | 17 | 0.042646 | 0 | 5.61183 |
| 1060 | 29 | 0.030632 | 0 | 6.41601 |
| 882  | 21 | 0.032053 | 0 | 6.30183 |
| 595  | 17 | 0.049655 | 0 | 5.26534 |
| 895  | 22 | 0.023269 | 0 | 7.21489 |
| 895  | 22 | 0.023269 | 0 | 7.21489 |
| 620  | 18 | 0.046168 | 0 | 5.42406 |
| 650  | 18 | 0.049319 | 0 | 5.28238 |
| 1023 | 29 | 0.032168 | 0 | 6.28863 |
| 649  | 18 | 0.037994 | 0 | 5.88241 |
| 1084 | 24 | 0.035134 | 0 | 6.07784 |
| 775  | 16 | 0.040545 | 0 | 5.72673 |
| 758  | 22 | 0.042672 | 0 | 5.60836 |
| 636  | 18 | 0.029581 | 0 | 6.51643 |
| 691  | 19 | 0.023428 | 0 | 7.19067 |
| 682  | 14 | 0.03569  | 0 | 6.04084 |
| 914  | 23 | 0.020321 | 0 | 7.63705 |
| 609  | 12 | 0.041745 | 0 | 5.66322 |
| 981  | 22 | 0.041428 | 0 | 5.67797 |
| 635  | 18 | 0.024647 | 0 | 7.04017 |
| 764  | 17 | 0.04615  | 0 | 5.42549 |
| 727  | 20 | 0.024955 | 0 | 7.01031 |
| 867  | 15 | 0.039733 | 0 | 5.77892 |
| 689  | 19 | 0.042867 | 0 | 5.59885 |
| 1042 | 25 | 0.024011 | 0 | 7.11072 |
| 933  | 25 | 0.035654 | 0 | 6.04489 |
| 926  | 25 | 0.017055 | 0 | 8.21899 |
| 675  | 19 | 0.029034 | 0 | 6.56398 |
| 607  | 17 | 0.034118 | 0 | 6.15023 |
| 1050 | 25 | 0.030146 | 0 | 6.45896 |
| 700  | 17 | 0.031391 | 0 | 6.35607 |
| 641  | 18 | 0.045285 | 0 | 5.47026 |
| 608  | 17 | 0.028178 | 0 | 6.6326  |
| 834  | 22 | 0.023596 | 0 | 7.17001 |
| 997  | 28 | 0.03561  | 0 | 6.04759 |
| 707  | 20 | 0.049505 | 0 | 5.27322 |
| 931  | 26 | 0.030411 | 0 | 6.43567 |
| 600  | 17 | 0.043908 | 0 | 5.54327 |
| 683  | 19 | 0.024117 | 0 | 7.09895 |
| 646  | 19 | 0.03155  | 0 | 6.34386 |
| 640  | 18 | 0.043935 | 0 | 5.54187 |



|      |    |          |      |         |
|------|----|----------|------|---------|
| 654  | 17 | 0.035937 | 0    | 6.02219 |
| 600  | 11 | 0.046556 | 0    | 5.40285 |
| 606  | 14 | 0.042222 | 0    | 5.6419  |
| 850  | 24 | 0.005341 | 0    | 13.9499 |
| 968  | 25 | 0.013736 | 0    | 9.05801 |
| 915  | 26 | 0.01852  | 0.75 | 7.96058 |
| 1021 | 28 | 0.017849 | 0    | 8.07575 |
| 876  | 25 | 0.02771  | 0    | 6.68619 |
| 925  | 25 | 0.028698 | 0    | 6.58984 |
| 683  | 13 | 0.035195 | 0    | 6.0734  |
| 594  | 12 | 0.038056 | 0    | 5.88057 |
| 818  | 23 | 0.033006 | 0    | 6.23462 |
| 980  | 27 | 0.028884 | 0    | 6.57153 |
| 712  | 20 | 0.036184 | 0    | 6.00543 |
| 1063 | 29 | 0.031629 | 0    | 6.33612 |
| 556  | 16 | 0.03388  | 0    | 6.16449 |
| 603  | 17 | 0.048587 | 0    | 5.31583 |
| 1284 | 32 | 0.013868 | 0    | 9.01066 |
| 1089 | 28 | 0.036008 | 0    | 6.01942 |
| 886  | 25 | 0.024514 | 0    | 7.05669 |
| 1176 | 32 | 0.029961 | 0    | 6.48119 |
| 739  | 17 | 0.011864 | 0    | 9.68478 |
| 536  | 15 | 0.035884 | 0    | 6.02901 |
| 859  | 24 | 0.028822 | 0    | 6.57824 |
| 741  | 18 | 0.047792 | 0    | 5.35071 |
| 630  | 18 | 0.04563  | 0    | 5.4551  |
| 1023 | 24 | 0.024037 | 0    | 7.10897 |
| 605  | 17 | 0.048728 | 0    | 5.30647 |
| 688  | 14 | 0.045285 | 0    | 5.47152 |
| 660  | 18 | 0.00572  | 0    | 13.5175 |
| 480  | 10 | 0.049125 | 0    | 5.29073 |
| 746  | 20 | 0.033342 | 0    | 6.19656 |
| 610  | 15 | 0.047316 | 0    | 5.37383 |
| 771  | 21 | 0.048754 | 0    | 5.30411 |
| 617  | 16 | 0.03486  | 0    | 6.10277 |
| 1158 | 32 | 0.018141 | 0    | 8.03358 |
| 668  | 19 | 0.049814 | 0    | 5.25672 |
| 688  | 13 | 0.042875 | 0    | 5.59651 |
| 613  | 12 | 0.0378   | 0    | 5.89093 |
| 1242 | 35 | 0.023984 | 0    | 7.11617 |
| 615  | 10 | 0.039424 | 0    | 5.7959  |
| 832  | 23 | 0.04058  | 0    | 5.72389 |
| 823  | 13 | 0.015801 | 0    | 8.4754  |
| 629  | 18 | 0.048622 | 0    | 5.31249 |
| 970  | 22 | 0.018414 | 0    | 7.98377 |
| 1134 | 32 | 0.035831 | 0    | 6.03294 |
| 614  | 17 | 0.038417 | 0    | 5.86211 |

|      |    |          |   |         |
|------|----|----------|---|---------|
| 708  | 19 | 0.035575 | 0 | 6.05243 |
| 847  | 20 | 0.023428 | 0 | 7.19222 |
| 720  | 13 | 0.025026 | 0 | 7.00063 |
| 620  | 13 | 0.049028 | 0 | 5.29306 |
| 608  | 10 | 0.02289  | 0 | 7.27011 |
| 622  | 13 | 0.043167 | 0 | 5.58024 |
| 600  | 17 | 0.027277 | 0 | 6.73953 |
| 957  | 27 | 0.034692 | 0 | 6.11199 |
| 596  | 16 | 0.037385 | 0 | 5.92357 |
| 869  | 20 | 0.048878 | 0 | 5.29802 |
| 611  | 16 | 0.048225 | 0 | 5.33004 |
| 653  | 18 | 0.044155 | 0 | 5.52874 |
| 673  | 14 | 0.040977 | 0 | 5.69855 |
| 881  | 25 | 0.018123 | 0 | 8.0375  |
| 674  | 19 | 0.0445   | 0 | 5.51043 |
| 594  | 17 | 0.039565 | 0 | 5.78971 |
| 492  | 14 | 0.048578 | 0 | 5.3172  |
| 886  | 24 | 0.04984  | 0 | 5.25554 |
| 625  | 17 | 0.048604 | 0 | 5.3131  |
| 793  | 20 | 0.035963 | 0 | 6.02142 |
| 793  | 20 | 0.035963 | 0 | 6.02142 |
| 689  | 19 | 0.030075 | 0 | 6.46684 |
| 680  | 16 | 0.046283 | 0 | 5.41669 |
| 764  | 21 | 0.044553 | 0 | 5.50698 |
| 977  | 26 | 0.033501 | 0 | 6.18685 |
| 820  | 23 | 0.04563  | 0 | 5.45549 |
| 985  | 20 | 0.013436 | 0 | 9.13283 |
| 846  | 24 | 0.02364  | 0 | 7.16235 |
| 597  | 17 | 0.04954  | 0 | 5.27212 |
| 745  | 18 | 0.023146 | 0 | 7.2292  |
| 607  | 16 | 0.04058  | 0 | 5.72424 |
| 857  | 22 | 0.032424 | 0 | 6.27195 |
| 694  | 15 | 0.039592 | 0 | 5.78613 |
| 752  | 19 | 0.024797 | 0 | 7.02787 |
| 946  | 25 | 0.035928 | 0 | 6.02307 |
| 620  | 17 | 0.049637 | 0 | 5.26563 |
| 703  | 19 | 0.035019 | 0 | 6.08862 |
| 1137 | 32 | 0.017832 | 0 | 8.07966 |
| 790  | 19 | 0.045515 | 0 | 5.46099 |
| 813  | 23 | 0.044985 | 0 | 5.48757 |
| 985  | 17 | 0.028283 | 0 | 6.61838 |
| 1113 | 29 | 0.017664 | 0 | 8.10574 |
| 717  | 20 | 0.030914 | 0 | 6.39789 |
| 636  | 18 | 0.032565 | 0 | 6.26452 |
| 588  | 17 | 0.049505 | 0 | 5.2732  |
| 585  | 15 | 0.047695 | 0 | 5.35704 |
| 680  | 18 | 0.014548 | 0 | 8.82631 |

|      |    |          |   |         |
|------|----|----------|---|---------|
| 626  | 15 | 0.022307 | 0 | 7.34506 |
| 626  | 15 | 0.022307 | 0 | 7.34506 |
| 1029 | 27 | 0.044694 | 0 | 5.50043 |
| 626  | 17 | 0.047633 | 0 | 5.36079 |
| 600  | 12 | 0.049973 | 0 | 5.24826 |
| 591  | 17 | 0.048454 | 0 | 5.3216  |
| 976  | 25 | 0.034339 | 0 | 6.13626 |
| 702  | 20 | 0.02665  | 0 | 6.80381 |
| 814  | 23 | 0.042337 | 0 | 5.63643 |
| 589  | 15 | 0.048958 | 0 | 5.29534 |
| 857  | 23 | 0.033121 | 0 | 6.22191 |
| 838  | 22 | 0.042875 | 0 | 5.59658 |
| 987  | 18 | 0.02778  | 0 | 6.68012 |
| 584  | 15 | 0.046406 | 0 | 5.41116 |
| 674  | 17 | 0.033342 | 0 | 6.19759 |
| 569  | 11 | 0.021945 | 0 | 7.39525 |
| 680  | 15 | 0.047068 | 0 | 5.38158 |
| 739  | 21 | 0.036228 | 0 | 6.00396 |
| 797  | 21 | 0.035654 | 0 | 6.0449  |
| 1248 | 33 | 0.048145 | 0 | 5.33384 |
| 1248 | 33 | 0.048145 | 0 | 5.33384 |
| 637  | 18 | 0.042372 | 0 | 5.63337 |
| 442  | 12 | 0.033509 | 0 | 6.18624 |
| 457  | 12 | 0.046177 | 0 | 5.42302 |
| 719  | 20 | 0.032335 | 0 | 6.27744 |
| 748  | 21 | 0.034039 | 0 | 6.15658 |
| 624  | 18 | 0.031982 | 0 | 6.30773 |
| 767  | 20 | 0.034931 | 0 | 6.09811 |
| 734  | 21 | 0.030022 | 0 | 6.47213 |
| 775  | 20 | 0.049584 | 0 | 5.26841 |
| 1074 | 26 | 0.017532 | 0 | 8.12894 |
| 886  | 25 | 0.021786 | 0 | 7.41202 |
| 892  | 20 | 0.023702 | 0 | 7.1525  |
| 594  | 17 | 0.047695 | 0 | 5.35684 |
| 453  | 11 | 0.03448  | 0 | 6.12919 |
| 1286 | 34 | 0.018291 | 0 | 8.00661 |
| 760  | 14 | 0.023128 | 0 | 7.23576 |
| 560  | 16 | 0.047422 | 0 | 5.36977 |
| 599  | 17 | 0.012412 | 0 | 9.51523 |
| 1004 | 27 | 0.020136 | 0 | 7.66633 |
| 675  | 19 | 0.037455 | 0 | 5.91627 |
| 616  | 17 | 0.035222 | 0 | 6.06997 |
| 592  | 17 | 0.040139 | 0 | 5.75369 |
| 633  | 15 | 0.049055 | 0 | 5.29277 |
| 592  | 10 | 0.043299 | 0 | 5.56965 |
| 759  | 19 | 0.019703 | 0 | 7.75548 |
| 819  | 20 | 0.025026 | 0 | 7.00132 |

|      |    |          |   |         |
|------|----|----------|---|---------|
| 682  | 19 | 0.038956 | 0 | 5.82835 |
| 625  | 18 | 0.047245 | 0 | 5.37611 |
| 735  | 19 | 0.028336 | 0 | 6.61473 |
| 639  | 18 | 0.03162  | 0 | 6.33657 |
| 611  | 17 | 0.044279 | 0 | 5.52436 |
| 676  | 15 | 0.044941 | 0 | 5.48924 |
| 408  | 10 | 0.041472 | 0 | 5.67734 |
| 536  | 10 | 0.044138 | 0 | 5.53038 |
| 1038 | 22 | 0.036228 | 0 | 6.00373 |
| 530  | 15 | 0.04992  | 0 | 5.25058 |
| 784  | 18 | 0.032229 | 0 | 6.2848  |
| 856  | 20 | 0.023128 | 0 | 7.23404 |
| 649  | 17 | 0.045744 | 0 | 5.44817 |
| 629  | 14 | 0.048039 | 0 | 5.33909 |
| 933  | 26 | 0.011317 | 0 | 9.87224 |
| 912  | 25 | 0.034039 | 0 | 6.15632 |
| 471  | 10 | 0.041322 | 0 | 5.6827  |
| 1085 | 24 | 0.035222 | 0 | 6.06959 |
| 838  | 21 | 0.049982 | 0 | 5.248   |
| 634  | 17 | 0.043846 | 0 | 5.54781 |
| 1118 | 31 | 0.014654 | 0 | 8.79158 |
| 643  | 18 | 0.039715 | 0 | 5.77984 |
| 632  | 18 | 0.032106 | 0 | 6.29627 |
| 617  | 17 | 0.039159 | 0 | 5.81525 |
| 905  | 20 | 0.048401 | 0 | 5.32465 |
| 1100 | 25 | 0.018044 | 0 | 8.05013 |
| 686  | 18 | 0.039106 | 0 | 5.82076 |
| 600  | 11 | 0.032477 | 0 | 6.26985 |
| 731  | 18 | 0.030049 | 0 | 6.46966 |
| 855  | 14 | 0.031108 | 0 | 6.3778  |
| 629  | 16 | 0.043635 | 0 | 5.55381 |
| 794  | 20 | 0.045709 | 0 | 5.44922 |
| 554  | 13 | 0.049364 | 0 | 5.27824 |
| 602  | 12 | 0.039124 | 0 | 5.81951 |
| 755  | 20 | 0.025573 | 0 | 6.93812 |
| 877  | 25 | 0.026633 | 0 | 6.80605 |
| 589  | 15 | 0.04984  | 0 | 5.25562 |
| 640  | 18 | 0.049902 | 0 | 5.25175 |
| 984  | 26 | 0.027056 | 0 | 6.75476 |
| 1070 | 28 | 0.030932 | 0 | 6.39649 |
| 670  | 13 | 0.035001 | 0 | 6.09155 |
| 965  | 24 | 0.049575 | 0 | 5.26939 |
| 753  | 21 | 0.033174 | 0 | 6.21433 |
| 702  | 13 | 0.021319 | 0 | 7.49175 |
| 674  | 18 | 0.034286 | 0 | 6.13949 |
| 608  | 17 | 0.044147 | 0 | 5.52974 |
| 2033 | 46 | 0.024523 | 0 | 7.05596 |

|      |    |          |   |         |
|------|----|----------|---|---------|
| 1138 | 32 | 0.008474 | 0 | 11.3128 |
| 858  | 22 | 0.018141 | 0 | 8.03366 |
| 759  | 19 | 0.036016 | 0 | 6.01825 |
| 601  | 12 | 0.043114 | 0 | 5.58311 |
| 817  | 21 | 0.03418  | 0 | 6.14433 |
| 817  | 21 | 0.03418  | 0 | 6.14433 |
| 685  | 19 | 0.048039 | 0 | 5.33892 |
| 710  | 13 | 0.034039 | 0 | 6.15769 |
| 472  | 14 | 0.049611 | 0 | 5.26672 |
| 647  | 18 | 0.047422 | 0 | 5.37052 |
| 991  | 23 | 0.033033 | 0 | 6.23028 |
| 645  | 18 | 0.038594 | 0 | 5.84798 |
| 817  | 20 | 0.02289  | 0 | 7.27068 |
| 1155 | 27 | 0.021327 | 0 | 7.49118 |
| 638  | 18 | 0.020127 | 0 | 7.67341 |
| 474  | 13 | 0.046362 | 0 | 5.41191 |
| 679  | 14 | 0.024717 | 0 | 7.03384 |
| 954  | 17 | 0.024717 | 0 | 7.0333  |
| 677  | 15 | 0.030958 | 0 | 6.39242 |
| 587  | 15 | 0.047925 | 0 | 5.34437 |
| 1127 | 31 | 0.022431 | 0 | 7.32955 |
| 419  | 12 | 0.04427  | 0 | 5.52455 |
| 591  | 17 | 0.047916 | 0 | 5.34504 |
| 604  | 14 | 0.046795 | 0 | 5.39373 |
| 623  | 17 | 0.039786 | 0 | 5.77502 |
| 1097 | 27 | 0.009481 | 0 | 10.7358 |
| 746  | 21 | 0.030049 | 0 | 6.47031 |
| 487  | 10 | 0.042602 | 0 | 5.61533 |
| 747  | 18 | 0.041348 | 0 | 5.68215 |
| 1095 | 27 | 0.035893 | 0 | 6.02781 |
| 772  | 21 | 0.048534 | 0 | 5.31885 |
| 968  | 24 | 0.020091 | 0 | 7.68259 |
| 656  | 14 | 0.046963 | 0 | 5.38687 |
| 748  | 21 | 0.04563  | 0 | 5.45533 |
| 836  | 23 | 0.034224 | 0 | 6.14273 |
| 618  | 15 | 0.046883 | 0 | 5.38942 |
| 764  | 21 | 0.030861 | 0 | 6.40176 |
| 725  | 20 | 0.024037 | 0 | 7.10714 |
| 1019 | 23 | 0.013718 | 0 | 9.059   |
| 460  | 13 | 0.04999  | 0 | 5.24791 |
| 858  | 24 | 0.02101  | 0 | 7.53901 |
| 378  | 11 | 0.029828 | 0 | 6.49565 |
| 935  | 26 | 0.030985 | 0 | 6.38717 |
| 1070 | 25 | 0.030446 | 0 | 6.43372 |
| 1070 | 25 | 0.030446 | 0 | 6.43372 |
| 564  | 16 | 0.02741  | 0 | 6.71768 |
| 587  | 11 | 0.045241 | 0 | 5.47551 |

|      |    |          |   |         |
|------|----|----------|---|---------|
| 875  | 24 | 0.029069 | 0 | 6.5607  |
| 442  | 13 | 0.044985 | 0 | 5.48745 |
| 828  | 23 | 0.047907 | 0 | 5.34605 |
| 651  | 18 | 0.033342 | 0 | 6.1982  |
| 688  | 20 | 0.033342 | 0 | 6.19828 |
| 695  | 13 | 0.017637 | 0 | 8.11149 |
| 688  | 17 | 0.039168 | 0 | 5.8142  |
| 602  | 15 | 0.043467 | 0 | 5.56125 |
| 590  | 16 | 0.048852 | 0 | 5.29969 |
| 620  | 17 | 0.023305 | 0 | 7.20963 |
| 498  | 14 | 0.032803 | 0 | 6.24875 |
| 667  | 15 | 0.034966 | 0 | 6.0932  |
| 592  | 17 | 0.048446 | 0 | 5.32222 |
| 694  | 18 | 0.034692 | 0 | 6.11259 |
| 599  | 17 | 0.045647 | 0 | 5.45384 |
| 423  | 12 | 0.031347 | 0 | 6.36024 |
| 863  | 24 | 0.034957 | 0 | 6.09646 |
| 846  | 24 | 0.02605  | 0 | 6.88432 |
| 417  | 12 | 0.047166 | 0 | 5.37832 |
| 839  | 24 | 0.023658 | 0 | 7.16072 |
| 650  | 19 | 0.035707 | 0 | 6.04001 |
| 790  | 22 | 0.020012 | 0 | 7.69778 |
| 587  | 17 | 0.047678 | 0 | 5.35852 |
| 935  | 21 | 0.005844 | 0 | 13.3479 |
| 601  | 14 | 0.044526 | 0 | 5.50858 |
| 1061 | 26 | 0.024117 | 0 | 7.09767 |
| 679  | 19 | 0.041737 | 0 | 5.66603 |
| 591  | 12 | 0.044764 | 0 | 5.49816 |
| 591  | 12 | 0.044764 | 0 | 5.49816 |
| 681  | 19 | 0.049072 | 0 | 5.29192 |
| 630  | 13 | 0.049814 | 0 | 5.25657 |
| 866  | 21 | 0.032565 | 0 | 6.26408 |
| 866  | 21 | 0.032565 | 0 | 6.26408 |
| 610  | 10 | 0.035831 | 0 | 6.03307 |
| 829  | 23 | 0.037561 | 0 | 5.9094  |
| 1967 | 50 | 0.016455 | 0 | 8.34281 |
| 616  | 17 | 0.046177 | 0 | 5.42302 |
| 990  | 20 | 0.016605 | 0 | 8.31185 |
| 990  | 20 | 0.016605 | 0 | 8.31185 |
| 596  | 11 | 0.049867 | 0 | 5.25336 |
| 640  | 18 | 0.046177 | 0 | 5.42299 |
| 782  | 22 | 0.033509 | 0 | 6.18558 |
| 639  | 18 | 0.048878 | 0 | 5.29778 |
| 639  | 18 | 0.048878 | 0 | 5.29778 |
| 1101 | 31 | 0.017752 | 0 | 8.09361 |
| 682  | 20 | 0.030217 | 0 | 6.45407 |
| 626  | 18 | 0.017117 | 0 | 8.21118 |

|      |    |          |   |         |
|------|----|----------|---|---------|
| 626  | 18 | 0.017117 | 0 | 8.21118 |
| 492  | 14 | 0.040218 | 0 | 5.74733 |
| 602  | 17 | 0.049575 | 0 | 5.2699  |
| 995  | 24 | 0.035125 | 0 | 6.08197 |
| 662  | 19 | 0.013762 | 0 | 9.04698 |
| 670  | 19 | 0.048075 | 0 | 5.33574 |
| 753  | 21 | 0.048763 | 0 | 5.30327 |
| 830  | 23 | 0.023428 | 0 | 7.19008 |
| 944  | 25 | 0.035566 | 0 | 6.05336 |
| 972  | 28 | 0.024391 | 0 | 7.06636 |
| 622  | 14 | 0.038779 | 0 | 5.84016 |
| 693  | 19 | 0.035955 | 0 | 6.02155 |
| 592  | 17 | 0.049443 | 0 | 5.27556 |
| 819  | 22 | 0.033245 | 0 | 6.20997 |
| 592  | 11 | 0.046327 | 0 | 5.41466 |
| 612  | 15 | 0.044853 | 0 | 5.49407 |
| 1051 | 18 | 0.022016 | 0 | 7.38938 |
| 585  | 16 | 0.04194  | 0 | 5.65444 |
| 602  | 12 | 0.04164  | 0 | 5.67089 |
| 602  | 12 | 0.04164  | 0 | 5.67089 |
| 477  | 14 | 0.049319 | 0 | 5.28237 |
| 877  | 25 | 0.049072 | 0 | 5.29242 |
| 416  | 12 | 0.049902 | 0 | 5.25241 |
| 802  | 23 | 0.023984 | 0 | 7.11591 |
| 1036 | 23 | 0.021663 | 0 | 7.44048 |
| 816  | 23 | 0.045921 | 0 | 5.43968 |
| 758  | 21 | 0.033377 | 0 | 6.19506 |
| 870  | 24 | 0.022139 | 0 | 7.37279 |
| 537  | 13 | 0.044147 | 0 | 5.53018 |
| 640  | 17 | 0.047925 | 0 | 5.34411 |
| 612  | 17 | 0.049567 | 0 | 5.26999 |
| 757  | 20 | 0.029175 | 0 | 6.54992 |
| 757  | 20 | 0.029175 | 0 | 6.54992 |
| 468  | 14 | 0.049964 | 0 | 5.24855 |
| 617  | 13 | 0.046097 | 0 | 5.43051 |
| 587  | 17 | 0.048163 | 0 | 5.33289 |
| 679  | 19 | 0.048454 | 0 | 5.32109 |
| 849  | 23 | 0.02658  | 0 | 6.81144 |
| 846  | 24 | 0.023958 | 0 | 7.1211  |
| 846  | 24 | 0.023958 | 0 | 7.1211  |
| 863  | 23 | 0.042355 | 0 | 5.63602 |
| 919  | 25 | 0.029837 | 0 | 6.49417 |
| 674  | 17 | 0.035902 | 0 | 6.02435 |
| 1050 | 27 | 0.011705 | 0 | 9.72978 |
| 902  | 25 | 0.020665 | 0 | 7.60166 |
| 881  | 25 | 0.030799 | 0 | 6.40687 |
| 1576 | 33 | 0.004343 | 0 | 15.0886 |

|      |    |          |   |         |
|------|----|----------|---|---------|
| 1014 | 29 | 0.030243 | 0 | 6.45168 |
| 620  | 18 | 0.034869 | 0 | 6.10228 |
| 590  | 17 | 0.044138 | 0 | 5.5305  |
| 810  | 23 | 0.016525 | 0 | 8.32187 |
| 935  | 26 | 0.0259   | 0 | 6.89836 |
| 606  | 17 | 0.041869 | 0 | 5.65872 |
| 1095 | 30 | 0.017867 | 0 | 8.0715  |
| 1224 | 34 | 0.024699 | 0 | 7.0361  |
| 732  | 20 | 0.049637 | 0 | 5.26582 |
| 599  | 17 | 0.048852 | 0 | 5.29958 |
| 693  | 15 | 0.033633 | 0 | 6.17653 |
| 618  | 17 | 0.049726 | 0 | 5.26138 |
| 1056 | 22 | 0.011105 | 0 | 9.97196 |
| 991  | 21 | 0.046583 | 0 | 5.40155 |
| 614  | 11 | 0.048331 | 0 | 5.32666 |
| 1263 | 29 | 0.024708 | 0 | 7.03467 |
| 1098 | 31 | 0.00572  | 0 | 13.507  |
| 675  | 17 | 0.029113 | 0 | 6.5553  |
| 682  | 19 | 0.032079 | 0 | 6.29745 |
| 682  | 19 | 0.032079 | 0 | 6.29745 |
| 1145 | 32 | 0.021168 | 0 | 7.52021 |
| 936  | 27 | 0.021116 | 0 | 7.52538 |
| 600  | 16 | 0.04058  | 0 | 5.72374 |
| 587  | 17 | 0.045223 | 0 | 5.4767  |
| 1045 | 25 | 0.021557 | 0 | 7.45533 |
| 899  | 21 | 0.03358  | 0 | 6.18012 |
| 816  | 19 | 0.048807 | 0 | 5.30148 |
| 816  | 19 | 0.048807 | 0 | 5.30148 |
| 797  | 23 | 0.03471  | 0 | 6.11136 |
| 465  | 13 | 0.027833 | 0 | 6.67309 |
| 835  | 23 | 0.025856 | 0 | 6.90339 |
| 631  | 11 | 0.047598 | 0 | 5.36269 |
| 664  | 14 | 0.023984 | 0 | 7.11594 |
| 648  | 13 | 0.047033 | 0 | 5.38444 |
| 639  | 13 | 0.023534 | 0 | 7.17795 |
| 1061 | 30 | 0.023887 | 0 | 7.12856 |
| 741  | 21 | 0.016764 | 0 | 8.28161 |
| 708  | 20 | 0.046609 | 0 | 5.40044 |
| 628  | 13 | 0.049284 | 0 | 5.28316 |
| 676  | 19 | 0.035884 | 0 | 6.02895 |
| 1122 | 26 | 0.01062  | 0 | 10.1709 |
| 746  | 16 | 0.03328  | 0 | 6.20653 |
| 746  | 16 | 0.03328  | 0 | 6.20653 |
| 609  | 11 | 0.041269 | 0 | 5.68459 |
| 541  | 15 | 0.038391 | 0 | 5.86354 |
| 590  | 14 | 0.044729 | 0 | 5.49993 |
| 754  | 19 | 0.046556 | 0 | 5.40275 |



|      |    |          |   |         |
|------|----|----------|---|---------|
| 592  | 16 | 0.048587 | 0 | 5.31546 |
| 980  | 27 | 0.029299 | 0 | 6.53817 |
| 980  | 27 | 0.029299 | 0 | 6.53817 |
| 893  | 23 | 0.03614  | 0 | 6.00929 |
| 571  | 16 | 0.033677 | 0 | 6.17265 |
| 950  | 26 | 0.024408 | 0 | 7.06543 |
| 599  | 10 | 0.02741  | 0 | 6.7194  |
| 605  | 17 | 0.04382  | 0 | 5.54857 |
| 600  | 15 | 0.044985 | 0 | 5.48752 |
| 628  | 15 | 0.02793  | 0 | 6.65774 |
| 652  | 15 | 0.04081  | 0 | 5.70957 |
| 652  | 15 | 0.04081  | 0 | 5.70957 |
| 618  | 18 | 0.045974 | 0 | 5.43615 |
| 604  | 17 | 0.046203 | 0 | 5.42047 |
| 958  | 21 | 0.022307 | 0 | 7.34728 |
| 937  | 26 | 0.018017 | 0 | 8.05435 |
| 735  | 21 | 0.045488 | 0 | 5.46218 |
| 882  | 17 | 0.030411 | 0 | 6.4351  |
| 783  | 22 | 0.043087 | 0 | 5.58475 |
| 639  | 18 | 0.045232 | 0 | 5.47581 |
| 657  | 19 | 0.031841 | 0 | 6.31996 |
| 708  | 20 | 0.029104 | 0 | 6.55614 |
| 631  | 15 | 0.024858 | 0 | 7.02167 |
| 496  | 11 | 0.034021 | 0 | 6.15976 |
| 657  | 17 | 0.033598 | 0 | 6.17821 |
| 1074 | 29 | 0.034586 | 0 | 6.12057 |
| 380  | 11 | 0.043202 | 0 | 5.57697 |
| 712  | 20 | 0.020957 | 0 | 7.55324 |
| 704  | 20 | 0.031673 | 0 | 6.33255 |
| 588  | 15 | 0.044023 | 0 | 5.53652 |
| 965  | 26 | 0.024196 | 0 | 7.09341 |
| 595  | 17 | 0.043237 | 0 | 5.57305 |
| 822  | 23 | 0.048754 | 0 | 5.30513 |
| 624  | 15 | 0.037243 | 0 | 5.93455 |
| 770  | 17 | 0.035125 | 0 | 6.08264 |
| 567  | 10 | 0.023252 | 0 | 7.21683 |
| 1786 | 44 | 0.007362 | 0 | 12.0136 |
| 1786 | 44 | 0.007362 | 0 | 12.0136 |
| 662  | 19 | 0.046671 | 0 | 5.39834 |
| 1165 | 32 | 0.017805 | 0 | 8.08451 |
| 1328 | 37 | 0.021151 | 0 | 7.52159 |
| 764  | 20 | 0.045241 | 0 | 5.47515 |
| 602  | 17 | 0.048587 | 0 | 5.31691 |
| 1142 | 32 | 0.024346 | 0 | 7.07148 |
| 610  | 17 | 0.039592 | 0 | 5.78644 |
| 761  | 19 | 0.034975 | 0 | 6.093   |
| 617  | 10 | 0.043193 | 0 | 5.57738 |

|      |    |          |   |         |
|------|----|----------|---|---------|
| 423  | 12 | 0.049796 | 0 | 5.25751 |
| 552  | 13 | 0.046345 | 0 | 5.41369 |
| 594  | 16 | 0.049214 | 0 | 5.28665 |
| 826  | 23 | 0.020409 | 0 | 7.62332 |
| 1219 | 34 | 0.023826 | 0 | 7.13486 |
| 616  | 17 | 0.046706 | 0 | 5.39744 |
| 708  | 19 | 0.013436 | 0 | 9.13242 |
| 883  | 25 | 0.002313 | 0 | 20.2254 |
| 603  | 16 | 0.047916 | 0 | 5.3454  |
| 618  | 16 | 0.031135 | 0 | 6.37446 |
| 798  | 21 | 0.032132 | 0 | 6.29339 |
| 964  | 25 | 0.017426 | 0 | 8.15647 |
| 602  | 14 | 0.040898 | 0 | 5.70417 |
| 636  | 14 | 0.038135 | 0 | 5.87279 |
| 617  | 18 | 0.04713  | 0 | 5.38001 |
| 615  | 14 | 0.040748 | 0 | 5.71303 |
| 719  | 20 | 0.029175 | 0 | 6.55168 |
| 620  | 18 | 0.024876 | 0 | 7.01923 |
| 795  | 22 | 0.020921 | 0 | 7.55917 |
| 646  | 15 | 0.030614 | 0 | 6.42002 |
| 856  | 23 | 0.032733 | 0 | 6.25376 |
| 606  | 16 | 0.042805 | 0 | 5.60057 |
| 819  | 23 | 0.031364 | 0 | 6.35858 |
| 773  | 20 | 0.021822 | 0 | 7.40718 |
| 1098 | 29 | 0.013815 | 0 | 9.0223  |
| 792  | 21 | 0.032662 | 0 | 6.25874 |
| 1416 | 40 | 0.049893 | 0 | 5.25247 |
| 592  | 17 | 0.042363 | 0 | 5.63543 |
| 995  | 27 | 0.020347 | 0 | 7.63301 |
| 589  | 17 | 0.04992  | 0 | 5.25113 |
| 445  | 13 | 0.045744 | 0 | 5.44773 |
| 604  | 17 | 0.04691  | 0 | 5.38779 |
| 944  | 25 | 0.020745 | 0 | 7.59081 |
| 964  | 27 | 0.043193 | 0 | 5.57729 |
| 645  | 18 | 0.020983 | 0 | 7.54823 |
| 676  | 17 | 0.028186 | 0 | 6.63032 |
| 636  | 18 | 0.034145 | 0 | 6.14755 |
| 636  | 18 | 0.034145 | 0 | 6.14755 |
| 1140 | 32 | 0.031973 | 0 | 6.30957 |
| 978  | 27 | 0.021407 | 0 | 7.48102 |
| 978  | 27 | 0.021407 | 0 | 7.48102 |
| 841  | 18 | 0.015016 | 0 | 8.67945 |
| 647  | 18 | 0.045471 | 0 | 5.46303 |
| 740  | 21 | 0.049364 | 0 | 5.27824 |
| 1013 | 29 | 0.035222 | 0 | 6.07035 |
| 793  | 22 | 0.035752 | 0 | 6.03763 |
| 648  | 19 | 0.044809 | 0 | 5.49693 |

|      |    |          |   |         |
|------|----|----------|---|---------|
| 722  | 20 | 0.030464 | 0 | 6.43149 |
| 901  | 25 | 0.025741 | 0 | 6.91695 |
| 601  | 15 | 0.049319 | 0 | 5.28144 |
| 825  | 22 | 0.034516 | 0 | 6.12581 |
| 613  | 16 | 0.044058 | 0 | 5.53403 |
| 609  | 16 | 0.04615  | 0 | 5.42592 |
| 814  | 21 | 0.033642 | 0 | 6.17561 |
| 1155 | 32 | 0.014963 | 0 | 8.70109 |
| 791  | 21 | 0.027816 | 0 | 6.67432 |
| 595  | 17 | 0.04834  | 0 | 5.32648 |
| 617  | 12 | 0.04683  | 0 | 5.39235 |
| 851  | 22 | 0.041075 | 0 | 5.69583 |
| 620  | 18 | 0.048075 | 0 | 5.33576 |
| 875  | 25 | 0.027401 | 0 | 6.72003 |
| 882  | 24 | 0.035045 | 0 | 6.08643 |
| 584  | 16 | 0.045577 | 0 | 5.45859 |
| 712  | 20 | 0.030005 | 0 | 6.47416 |
| 550  | 13 | 0.049425 | 0 | 5.27678 |
| 742  | 21 | 0.033465 | 0 | 6.18873 |
| 832  | 23 | 0.024205 | 0 | 7.09209 |
| 744  | 21 | 0.017443 | 0 | 8.14824 |
| 784  | 22 | 0.021133 | 0 | 7.52431 |
| 741  | 20 | 0.042867 | 0 | 5.59774 |
| 656  | 18 | 0.039132 | 0 | 5.81869 |
| 867  | 23 | 0.023887 | 0 | 7.12755 |
| 435  | 11 | 0.034304 | 0 | 6.13864 |
| 645  | 17 | 0.048754 | 0 | 5.30367 |
| 704  | 20 | 0.016684 | 0 | 8.30215 |
| 607  | 10 | 0.043484 | 0 | 5.56004 |
| 1107 | 29 | 0.048728 | 0 | 5.30646 |
| 652  | 18 | 0.043087 | 0 | 5.58497 |
| 857  | 20 | 0.014919 | 0 | 8.71758 |
| 692  | 16 | 0.034542 | 0 | 6.12483 |
| 661  | 15 | 0.043476 | 0 | 5.56074 |
| 593  | 15 | 0.043175 | 0 | 5.57893 |
| 473  | 12 | 0.030146 | 0 | 6.45859 |
| 1100 | 27 | 0.031673 | 0 | 6.33283 |
| 634  | 17 | 0.049319 | 0 | 5.28241 |
| 615  | 12 | 0.048878 | 0 | 5.29792 |
| 678  | 20 | 0.032891 | 0 | 6.2419  |
| 723  | 14 | 0.022757 | 0 | 7.2939  |
| 604  | 16 | 0.033121 | 0 | 6.21965 |
| 662  | 12 | 0.046389 | 0 | 5.41153 |
| 703  | 20 | 0.035831 | 0 | 6.03276 |
| 637  | 15 | 0.041198 | 0 | 5.68704 |
| 606  | 12 | 0.046124 | 0 | 5.4297  |
| 614  | 17 | 0.04984  | 0 | 5.25483 |

|      |    |          |   |         |
|------|----|----------|---|---------|
| 774  | 15 | 0.049902 | 0 | 5.25217 |
| 842  | 24 | 0.029978 | 0 | 6.47642 |
| 597  | 15 | 0.049575 | 0 | 5.2693  |
| 617  | 16 | 0.024276 | 0 | 7.08606 |
| 586  | 17 | 0.039945 | 0 | 5.76152 |
| 1110 | 30 | 0.018776 | 0 | 7.92311 |
| 597  | 17 | 0.049884 | 0 | 5.25254 |
| 1055 | 30 | 0.013294 | 0 | 9.18223 |
| 1448 | 36 | 0.014724 | 0 | 8.77334 |
| 378  | 11 | 0.04465  | 0 | 5.50332 |
| 1055 | 30 | 0.013815 | 0 | 9.02181 |
| 841  | 24 | 0.030146 | 0 | 6.45818 |
| 611  | 18 | 0.036052 | 0 | 6.01641 |
| 1615 | 39 | 0.035328 | 0 | 6.06354 |
| 1077 | 30 | 0.030861 | 0 | 6.40244 |
| 896  | 20 | 0.033518 | 0 | 6.1853  |
| 580  | 16 | 0.045179 | 0 | 5.47958 |
| 580  | 16 | 0.045179 | 0 | 5.47958 |
| 731  | 18 | 0.031947 | 0 | 6.31187 |
| 559  | 13 | 0.04984  | 0 | 5.2554  |
| 690  | 13 | 0.030278 | 0 | 6.44923 |
| 649  | 18 | 0.047386 | 0 | 5.37175 |
| 725  | 14 | 0.043988 | 0 | 5.53783 |
| 775  | 21 | 0.030499 | 0 | 6.42982 |
| 909  | 22 | 0.044438 | 0 | 5.51427 |
| 623  | 17 | 0.023781 | 0 | 7.1416  |
| 653  | 17 | 0.019924 | 0 | 7.70877 |
| 694  | 19 | 0.03426  | 0 | 6.14128 |
| 599  | 11 | 0.043167 | 0 | 5.58081 |
| 860  | 20 | 0.035319 | 0 | 6.0652  |
| 783  | 22 | 0.009878 | 0 | 10.4832 |
| 596  | 17 | 0.027807 | 0 | 6.67714 |
| 639  | 13 | 0.035125 | 0 | 6.08203 |
| 656  | 19 | 0.04359  | 0 | 5.55557 |
| 586  | 16 | 0.048666 | 0 | 5.31038 |
| 857  | 23 | 0.034869 | 0 | 6.10071 |
| 1658 | 46 | 0.031338 | 0 | 6.36172 |
| 695  | 19 | 0.038647 | 0 | 5.84545 |
| 695  | 19 | 0.038647 | 0 | 5.84545 |
| 602  | 17 | 0.049161 | 0 | 5.28858 |
| 2065 | 57 | 0.013127 | 0 | 9.25121 |
| 1084 | 30 | 0.024523 | 0 | 7.05641 |
| 606  | 12 | 0.046892 | 0 | 5.38906 |
| 618  | 17 | 0.032194 | 0 | 6.28712 |
| 1005 | 25 | 0.003628 | 0 | 16.5513 |
| 584  | 13 | 0.048666 | 0 | 5.30945 |
| 708  | 18 | 0.018273 | 0 | 8.01165 |

|      |    |          |   |         |
|------|----|----------|---|---------|
| 888  | 25 | 0.047448 | 0 | 5.36819 |
| 640  | 18 | 0.042134 | 0 | 5.64778 |
| 839  | 22 | 0.019933 | 0 | 7.70807 |
| 991  | 22 | 0.033165 | 0 | 6.21559 |
| 572  | 11 | 0.048587 | 0 | 5.31715 |
| 782  | 21 | 0.023128 | 0 | 7.23574 |
| 987  | 21 | 0.031135 | 0 | 6.37401 |
| 607  | 13 | 0.048754 | 0 | 5.3049  |
| 624  | 18 | 0.031735 | 0 | 6.3291  |
| 692  | 20 | 0.015854 | 0 | 8.46111 |
| 759  | 20 | 0.031929 | 0 | 6.31317 |
| 639  | 13 | 0.036149 | 0 | 6.00851 |
| 596  | 13 | 0.032009 | 0 | 6.30505 |
| 822  | 22 | 0.045285 | 0 | 5.4705  |
| 872  | 24 | 0.035372 | 0 | 6.06206 |
| 1080 | 28 | 0.031046 | 0 | 6.38007 |
| 974  | 22 | 0.016304 | 0 | 8.37342 |
| 831  | 22 | 0.032565 | 0 | 6.26588 |
| 630  | 12 | 0.033324 | 0 | 6.19926 |
| 590  | 14 | 0.042469 | 0 | 5.62813 |

## Gene List WT H3K9me3 Control Diet

| chromosome | feature start | feature end | feature      | chromosome | region start | region end |
|------------|---------------|-------------|--------------|------------|--------------|------------|
| 1          | 193768741     | 193781114   | NM_181796    | chr1       | 193780169    | 193780850  |
| 1          | 192875592     | 192889955   | NM_007498    | chr1       | 192882673    | 192883623  |
| 1          | 191860602     | 191877468   | NM_008937    | chr1       | 191873644    | 191874266  |
| 1          | 189956811     | 189965322   | NM_021408    | chr1       | 189958542    | 189959174  |
| 1          | 189692647     | 189701224   | NM_011935    | chr1       | 189695841    | 189696527  |
| 1          | 188655296     | 188670703   | NM_033077    | chr1       | 188668519    | 188670432  |
| 1          | 188655296     | 188670703   | NM_033077    | chr1       | 188667023    | 188668289  |
| 1          | 188655296     | 188670703   | NM_033077    | chr1       | 188657780    | 188658562  |
| 1          | 187149636     | 187158785   | NM_001033286 | chr1       | 187156741    | 187157678  |
| 1          | 186502357     | 186517985   | BC028441     | chr1       | 186502385    | 186503068  |
| 1          | 183183303     | 183192176   | NM_028408    | chr1       | 183190286    | 183191161  |
| 1          | 182399648     | 182408149   | NM_007415    | chr1       | 182404358    | 182404967  |
| 2          | 181787852     | 181796351   | NM_025901    | chr2       | 181793359    | 181794257  |
| 2          | 181386310     | 181394833   | NM_028125    | chr2       | 181388033    | 181388767  |
| 2          | 181288335     | 181297422   | NM_144894    | chr2       | 181293373    | 181294154  |
| 2          | 181292247     | 181300768   | NM_029702    | chr2       | 181293373    | 181294154  |
| 2          | 181110712     | 181119270   | NM_025598    | chr2       | 181118364    | 181119140  |
| 2          | 180890673     | 180899193   | NM_145760    | chr2       | 180895375    | 180895989  |
| 2          | 180569391     | 180578099   | NM_178254    | chr2       | 180573186    | 180573964  |
| 2          | 180569391     | 180578099   | NM_178254    | chr2       | 180572144    | 180572696  |
| 2          | 180569391     | 180578099   | NM_178254    | chr2       | 180570389    | 180571097  |
| 1          | 180359800     | 180368636   | NM_177724    | chr1       | 180364894    | 180365714  |
| 1          | 178645335     | 178654064   | NM_029756    | chr1       | 178645450    | 178646259  |
| 2          | 178354015     | 178362514   | NM_198656    | chr2       | 178361869    | 178362465  |
| 2          | 178334567     | 178349615   | NM_177191    | chr2       | 178347110    | 178347983  |
| 1          | 177459754     | 177468263   | NM_010209    | chr1       | 177468232    | 177468954  |
| 1          | 177462868     | 177471367   | NM_133809    | chr1       | 177468232    | 177468954  |
| 2          | 177433628     | 177446649   | BC124559     | chr2       | 177443432    | 177444032  |
| 1          | 176261105     | 176269604   | NM_146761    | chr1       | 176267508    | 176268174  |
| 1          | 176221746     | 176230245   | NM_146714    | chr1       | 176228560    | 176229149  |
| 1          | 175982156     | 175997949   | NM_146305    | chr1       | 175994449    | 175995046  |
| 1          | 175872608     | 175889549   | NM_146717    | chr1       | 175874624    | 175875240  |
| 1          | 175292822     | 175301321   | NM_001013779 | chr1       | 175297560    | 175298167  |
| 1          | 175046282     | 175054781   | NM_146881    | chr1       | 175049535    | 175050267  |
| 1          | 175018608     | 175027107   | NM_146763    | chr1       | 175026419    | 175027011  |
| 1          | 174787443     | 174795942   | NM_008763    | chr1       | 174791431    | 174792301  |
| 1          | 174330722     | 174344293   | NM_178598    | chr1       | 174341310    | 174341975  |
| 1          | 174132151     | 174148391   | NM_178405    | chr1       | 174138847    | 174139548  |
| 2          | 174113381     | 174121880   | NM_025531    | chr2       | 174114422    | 174115319  |
| 2          | 174104504     | 174113040   | NM_025983    | chr2       | 174106546    | 174107198  |
| 2          | 173964707     | 173975778   | BC062654     | chr2       | 173969164    | 173970118  |
| 1          | 173512684     | 173521229   | NM_007649    | chr1       | 173516065    | 173517221  |
| 1          | 173115088     | 173137657   | NM_013919    | chr1       | 173122644    | 173123247  |
| 1          | 173081275     | 173089787   | NM_153064    | chr1       | 173084063    | 173084866  |

|   |   |           |           |              |      |           |           |
|---|---|-----------|-----------|--------------|------|-----------|-----------|
|   | 1 | 173055764 | 173064282 | NM_013474    | chr1 | 173057400 | 173058141 |
|   | 1 | 173056360 | 173065189 | NM_001037170 | chr1 | 173057400 | 173058141 |
|   | 2 | 172616781 | 172625317 | NM_012046    | chr2 | 172622680 | 172623186 |
|   | 2 | 172030814 | 172039321 | NM_025912    | chr2 | 172034980 | 172035666 |
|   | 2 | 172030814 | 172039321 | NM_025912    | chr2 | 172032884 | 172034603 |
|   | 2 | 170181633 | 170190132 | NM_001013369 | chr2 | 170182768 | 170183362 |
|   | 1 | 168832150 | 168840649 | NM_175461    | chr1 | 168832703 | 168833455 |
|   | 2 | 168455907 | 168464406 | NM_175303    | chr2 | 168457751 | 168458407 |
|   | 1 | 167961103 | 167969641 | NM_021610    | chr1 | 167964646 | 167965272 |
|   | 1 | 167962055 | 167970573 | NM_001033344 | chr1 | 167964646 | 167965272 |
|   | 1 | 167619364 | 167627942 | NM_031162    | chr1 | 167625041 | 167625623 |
|   | 1 | 165945939 | 165954438 | NM_011347    | chr1 | 165952132 | 165952703 |
| X |   | 165317556 | 165326055 | BC059027     | chrX | 165322334 | 165326013 |
| X |   | 165317556 | 165326055 | BC059027     | chrX | 165319493 | 165320167 |
| X |   | 165317556 | 165326055 | BC059027     | chrX | 165318519 | 165319174 |
|   | 1 | 165146989 | 165156325 | NM_175686    | chr1 | 165151717 | 165152720 |
|   | 1 | 165146989 | 165156325 | NM_175686    | chr1 | 165148231 | 165149058 |
|   | 2 | 164653459 | 164662023 | NM_020333    | chr2 | 164661203 | 164661988 |
|   | 1 | 164469841 | 164478379 | NM_010865    | chr1 | 164469230 | 164469922 |
|   | 2 | 162776725 | 162787042 | NM_026630    | chr2 | 162778436 | 162779163 |
|   | 2 | 162349999 | 162358588 | NM_021464    | chr2 | 162355445 | 162356074 |
| X |   | 159775099 | 159784709 | NM_026853    | chrX | 159776314 | 159777057 |
| X |   | 159599785 | 159608298 | NM_009759    | chrX | 159603617 | 159604273 |
| X |   | 159247265 | 159255764 | NM_026887    | chrX | 159254991 | 159255674 |
| X |   | 159247265 | 159255764 | NM_026887    | chrX | 159253821 | 159254539 |
| X |   | 159247265 | 159255764 | NM_026887    | chrX | 159252177 | 159252789 |
| X |   | 159102866 | 159111434 | NM_028842    | chrX | 159104416 | 159105282 |
|   | 2 | 158453534 | 158462039 | BC068129     | chr2 | 158459143 | 158459770 |
|   | 2 | 158453534 | 158462039 | BC068129     | chr2 | 158455326 | 158456232 |
|   | 2 | 158350839 | 158361078 | NM_153089    | chr2 | 158358474 | 158359081 |
| X |   | 158171001 | 158179559 | NM_178935    | chrX | 158175970 | 158176551 |
| X |   | 158098538 | 158107063 | NM_009031    | chrX | 158105262 | 158106065 |
|   | 2 | 157991934 | 158000545 | NM_008489    | chr2 | 157995649 | 157996307 |
|   | 3 | 157463680 | 157478860 | NM_017381    | chr3 | 157468158 | 157469592 |
|   | 3 | 157463680 | 157478860 | NM_017381    | chr3 | 157467151 | 157468098 |
| X |   | 155840312 | 155849294 | NM_172783    | chrX | 155847077 | 155847875 |
|   | 2 | 155750668 | 155759254 | NM_139151    | chr2 | 155754403 | 155755009 |
|   | 2 | 155508170 | 155532295 | NM_027788    | chr2 | 155518544 | 155519253 |
| X |   | 155479942 | 155488461 | NM_008810    | chrX | 155484944 | 155485824 |
| X |   | 155479942 | 155488461 | NM_008810    | chrX | 155481396 | 155482008 |
|   | 4 | 154669446 | 154693771 | NM_010091    | chr4 | 154684593 | 154685630 |
| X |   | 154594225 | 154602724 | NM_148945    | chrX | 154598466 | 154599357 |
|   | 2 | 153885821 | 153894320 | NM_153418    | chr2 | 153891909 | 153892551 |
|   | 4 | 153798723 | 153810432 | NM_172990    | chr4 | 153804558 | 153805636 |
| X |   | 153384716 | 153393215 | NM_177751    | chrX | 153385490 | 153386215 |
|   | 1 | 153184866 | 153193382 | NM_026876    | chr1 | 153189485 | 153190091 |
|   | 1 | 153188094 | 153196654 | NM_025819    | chr1 | 153189485 | 153190091 |

|   |   |           |           |              |      |           |           |
|---|---|-----------|-----------|--------------|------|-----------|-----------|
|   | 2 | 152372589 | 152382842 | NM_025543    | chr2 | 152377412 | 152378508 |
|   | 1 | 152225317 | 152234383 | AB034730     | chr1 | 152227049 | 152227681 |
|   | 3 | 152201142 | 152209648 | NM_199465    | chr3 | 152202708 | 152203363 |
|   | 1 | 152185582 | 152194081 | BC029834     | chr1 | 152190825 | 152191436 |
|   | 2 | 152101028 | 152109527 | NM_177656    | chr2 | 152108903 | 152109558 |
|   | 2 | 152103969 | 152112468 | NM_175126    | chr2 | 152108903 | 152109558 |
|   | 1 | 152025771 | 152037479 | BC086491     | chr1 | 152027649 | 152028245 |
| X |   | 150961539 | 150970041 | BC116312     | chrX | 150966105 | 150966962 |
| X |   | 150961539 | 150970041 | BC116312     | chrX | 150961891 | 150963183 |
|   | 5 | 150805381 | 150813880 | BC059904     | chr5 | 150809955 | 150810961 |
| X |   | 150597226 | 150605811 | NM_019736    | chrX | 150599924 | 150600310 |
| X |   | 150486066 | 150497970 | BC100353     | chrX | 150496107 | 150497267 |
| X |   | 150428007 | 150437540 | NM_020015    | chrX | 150430587 | 150431182 |
| X |   | 150428007 | 150437540 | NM_020015    | chrX | 150429278 | 150430135 |
| X |   | 150393702 | 150408269 | NM_020018    | chrX | 150405155 | 150405941 |
| X |   | 150393702 | 150408269 | NM_020018    | chrX | 150403254 | 150404033 |
| X |   | 150393702 | 150408269 | NM_020018    | chrX | 150399860 | 150400885 |
| X |   | 150370717 | 150380008 | NM_020016    | chrX | 150378333 | 150379490 |
| X |   | 150370717 | 150380008 | NM_020016    | chrX | 150373227 | 150374621 |
| X |   | 150370717 | 150380008 | NM_020016    | chrX | 150371933 | 150372543 |
|   | 2 | 150297465 | 150305983 | NM_027977    | chr2 | 150303659 | 150304047 |
| X |   | 150287786 | 150296285 | NM_020017    | chrX | 150291463 | 150292188 |
| X |   | 150287786 | 150296285 | NM_020017    | chrX | 150290558 | 150291222 |
| X |   | 150287786 | 150296285 | NM_020017    | chrX | 150288906 | 150289965 |
| X |   | 150263339 | 150272837 | NM_020019    | chrX | 150264999 | 150266420 |
|   | 4 | 149897544 | 149907753 | NM_009498    | chr4 | 149903273 | 149904044 |
|   | 4 | 149897544 | 149907753 | NM_009498    | chr4 | 149902143 | 149903256 |
| X |   | 149816718 | 149825217 | NM_029199    | chrX | 149824664 | 149825180 |
| X |   | 148893309 | 148901808 | NM_173367    | chrX | 148900219 | 148900761 |
|   | 5 | 148859878 | 148869138 | NM_011908    | chr5 | 148863013 | 148864092 |
| X |   | 148572761 | 148581260 | NM_173780    | chrX | 148578778 | 148579688 |
|   | 2 | 148421336 | 148429908 | NM_019632    | chr2 | 148425567 | 148426405 |
|   | 6 | 148399023 | 148407522 | NM_198967    | chr6 | 148405617 | 148406735 |
|   | 4 | 148356043 | 148364623 | NM_023465    | chr4 | 148361464 | 148362196 |
|   | 4 | 148267679 | 148276549 | NM_022022    | chr4 | 148269320 | 148270440 |
|   | 2 | 147734849 | 147744410 | NM_010446    | chr2 | 147737789 | 147738420 |
| X |   | 147138043 | 147146560 | NM_021523    | chrX | 147144586 | 147146335 |
| X |   | 147138043 | 147146560 | NM_021523    | chrX | 147142779 | 147144123 |
| X |   | 147138043 | 147146560 | NM_021523    | chrX | 147139730 | 147140344 |
|   | 4 | 146993022 | 147009686 | NM_015797    | chr4 | 147000060 | 147000686 |
|   | 4 | 146998468 | 147006967 | NM_176848    | chr4 | 147000060 | 147000686 |
|   | 2 | 146875301 | 146883843 | NM_010919    | chr2 | 146879503 | 146880121 |
|   | 2 | 146713601 | 146722100 | BC004028     | chr2 | 146719443 | 146720054 |
|   | 4 | 146709763 | 146718347 | NM_001025365 | chr4 | 146716088 | 146716691 |
|   | 6 | 146709628 | 146718130 | AY292400     | chr6 | 146713941 | 146714668 |
|   | 4 | 146483799 | 146492298 | BC058858     | chr4 | 146490258 | 146491112 |
|   | 4 | 146483799 | 146492298 | BC058858     | chr4 | 146488330 | 146488811 |



|   |   |           |                        |      |           |           |
|---|---|-----------|------------------------|------|-----------|-----------|
|   | 4 | 146483799 | 146492298 BC058858     | chr4 | 146486463 | 146487545 |
|   | 4 | 146483799 | 146492298 BC058858     | chr4 | 146485477 | 146486203 |
|   | 4 | 146456730 | 146465229 NM_145078    | chr4 | 146460064 | 146463069 |
|   | 4 | 146456730 | 146465229 NM_145078    | chr4 | 146458551 | 146459451 |
|   | 3 | 146456295 | 146464804 NM_027371    | chr3 | 146458119 | 146458898 |
|   | 4 | 146456730 | 146465229 NM_145078    | chr4 | 146457446 | 146457906 |
|   | 4 | 146391107 | 146399606 NM_001014397 | chr4 | 146395433 | 146399300 |
|   | 3 | 146053064 | 146061676 NM_134160    | chr3 | 146060585 | 146061243 |
|   | 3 | 146042923 | 146059640 NM_172864    | chr3 | 146044154 | 146044871 |
|   | 4 | 145969893 | 145978392 BC024323     | chr4 | 145977173 | 145978056 |
|   | 4 | 145969893 | 145978392 BC024323     | chr4 | 145974823 | 145975922 |
|   | 4 | 145969893 | 145978392 BC024323     | chr4 | 145974045 | 145974501 |
|   | 4 | 145969893 | 145978392 BC024323     | chr4 | 145971805 | 145972698 |
|   | 4 | 145969893 | 145978392 BC024323     | chr4 | 145970257 | 145970970 |
|   | 4 | 145890306 | 145898805 NM_009051    | chr4 | 145895332 | 145898781 |
|   | 4 | 145890306 | 145898805 NM_009051    | chr4 | 145894493 | 145895074 |
|   | 4 | 145809847 | 145818346 AF051348     | chr4 | 145817020 | 145817928 |
|   | 4 | 145809847 | 145818346 AF051348     | chr4 | 145815960 | 145816860 |
|   | 4 | 145809847 | 145818346 AF051348     | chr4 | 145814143 | 145815909 |
|   | 4 | 145809847 | 145818346 AF051348     | chr4 | 145811963 | 145812757 |
|   | 3 | 145584852 | 145593367 NM_010516    | chr3 | 145586941 | 145587708 |
|   | 4 | 145528370 | 145536936 NM_001037926 | chr4 | 145536606 | 145536959 |
|   | 4 | 145528370 | 145536936 NM_001037926 | chr4 | 145534836 | 145536291 |
|   | 4 | 145528370 | 145536936 NM_001037926 | chr4 | 145532795 | 145534485 |
|   | 4 | 145528370 | 145536936 NM_001037926 | chr4 | 145530544 | 145531422 |
|   | 4 | 145528370 | 145536936 NM_001037926 | chr4 | 145528479 | 145529057 |
|   | 3 | 145049975 | 145058505 NM_025714    | chr3 | 145052975 | 145053737 |
|   | 4 | 144931384 | 144939883 BC096593     | chr4 | 144938722 | 144939599 |
|   | 4 | 144931384 | 144939883 BC096593     | chr4 | 144935702 | 144938352 |
| X |   | 144929317 | 144937816 NM_001037716 | chrX | 144934698 | 144937251 |
|   | 4 | 144931384 | 144939883 BC096593     | chr4 | 144933497 | 144934251 |
| X |   | 144929317 | 144937816 NM_001037716 | chrX | 144930007 | 144934073 |
|   | 3 | 144784189 | 144792688 NM_139148    | chr3 | 144785099 | 144785703 |
|   | 4 | 144771482 | 144784069 NM_001013808 | chr4 | 144781927 | 144783203 |
|   | 4 | 144771482 | 144784069 NM_001013808 | chr4 | 144777632 | 144778831 |
|   | 4 | 144771482 | 144784069 NM_001013808 | chr4 | 144775890 | 144777611 |
| X |   | 144328683 | 144337182 NM_011022    | chrX | 144334458 | 144335320 |
| X |   | 144328683 | 144337182 NM_011022    | chrX | 144331529 | 144333428 |
| X |   | 144328683 | 144337182 NM_011022    | chrX | 144329367 | 144330521 |
|   | 4 | 143780509 | 143789008 NM_198662    | chr4 | 143787754 | 143788522 |
|   | 4 | 143780509 | 143789008 NM_198662    | chr4 | 143786510 | 143787166 |
|   | 4 | 143544654 | 143553153 BC052827     | chr4 | 143549982 | 143551065 |
|   | 5 | 143494348 | 143502893 NM_177681    | chr5 | 143501029 | 143501618 |
|   | 4 | 143451416 | 143459915 NM_198661    | chr4 | 143451440 | 143452403 |
|   | 4 | 143426824 | 143435323 NM_201258    | chr4 | 143432497 | 143433574 |
|   | 4 | 143426824 | 143435323 NM_201258    | chr4 | 143430173 | 143430792 |
|   | 4 | 143426824 | 143435323 NM_201258    | chr4 | 143426950 | 143428004 |

|   |   |           |           |              |      |           |           |
|---|---|-----------|-----------|--------------|------|-----------|-----------|
|   | 7 | 143267773 | 143276386 | NM_009876    | chr7 | 143270661 | 143271273 |
|   | 7 | 143267773 | 143276386 | NM_009876    | chr7 | 143267773 | 143268488 |
| X |   | 143233392 | 143241891 | BC109131     | chrX | 143239019 | 143241657 |
| X |   | 143233392 | 143241891 | BC109131     | chrX | 143237657 | 143238702 |
| X |   | 143233392 | 143241891 | BC109131     | chrX | 143234764 | 143237151 |
| X |   | 143233392 | 143241891 | BC109131     | chrX | 143233398 | 143233968 |
|   | 5 | 143219495 | 143228010 | NM_007984    | chr5 | 143224997 | 143225733 |
|   | 5 | 143169348 | 143177864 | NM_007393    | chr5 | 143170733 | 143171504 |
|   | 5 | 143080028 | 143088527 | NM_178242    | chr5 | 143081865 | 143082874 |
|   | 6 | 142759225 | 142767724 | NM_001033417 | chr6 | 142761880 | 142762805 |
|   | 4 | 142673113 | 142682173 | NM_172877    | chr4 | 142680901 | 142681576 |
|   | 7 | 142464303 | 142474879 | NM_010514    | chr7 | 142472730 | 142476717 |
|   | 7 | 142383906 | 142392849 | BC025150     | chr7 | 142388188 | 142391781 |
|   | 7 | 142264202 | 142272759 | D49691       | chr7 | 142271609 | 142272500 |
|   | 7 | 142238367 | 142254357 | NM_018802    | chr7 | 142241604 | 142242380 |
| X |   | 142202881 | 142211380 | NM_008312    | chrX | 142210114 | 142210824 |
|   | 7 | 142036862 | 142045361 | NM_001037822 | chr7 | 142043704 | 142044820 |
|   | 7 | 141709278 | 141717805 | NM_023764    | chr7 | 141713125 | 141713774 |
|   | 3 | 141146663 | 141155742 | NM_008811    | chr3 | 141147743 | 141148842 |
|   | 7 | 141039477 | 141048963 | NM_153777    | chr7 | 141046926 | 141047666 |
|   | 7 | 141042703 | 141051314 | NM_008284    | chr7 | 141046926 | 141047666 |
|   | 7 | 140906594 | 140915093 | NM_177897    | chr7 | 140912988 | 140913675 |
|   | 5 | 140853815 | 140870668 | NM_008494    | chr5 | 140857474 | 140858060 |
|   | 7 | 140749211 | 140757743 | NM_007751    | chr7 | 140750269 | 140751817 |
|   | 7 | 140549485 | 140557984 | NM_146962    | chr7 | 140555722 | 140556351 |
|   | 7 | 140337937 | 140346436 | NM_146954    | chr7 | 140344092 | 140344801 |
|   | 7 | 140337937 | 140346436 | NM_146954    | chr7 | 140342923 | 140343706 |
|   | 7 | 140268592 | 140277091 | NM_147026    | chr7 | 140270238 | 140270825 |
|   | 5 | 140217633 | 140226132 | BC059029     | chr5 | 140221181 | 140221811 |
|   | 7 | 140194808 | 140203307 | NM_146955    | chr7 | 140198147 | 140198777 |
|   | 7 | 140181184 | 140189683 | NM_001011776 | chr7 | 140185593 | 140186190 |
|   | 7 | 140168021 | 140176520 | NM_146956    | chr7 | 140175238 | 140175828 |
|   | 6 | 139997963 | 140006486 | NM_007605    | chr6 | 140005442 | 140006081 |
|   | 6 | 140001319 | 140009837 | NM_054066    | chr6 | 140005442 | 140006081 |
|   | 6 | 139997963 | 140006486 | NM_007605    | chr6 | 140003290 | 140004374 |
|   | 6 | 140001319 | 140009837 | NM_054066    | chr6 | 140003290 | 140004374 |
|   | 7 | 139897907 | 139906406 | NM_010836    | chr7 | 139901635 | 139902246 |
|   | 7 | 139881725 | 139890608 | BC065404     | chr7 | 139881752 | 139882393 |
|   | 5 | 139417816 | 139426347 | BC053401     | chr5 | 139424880 | 139425805 |
|   | 3 | 139137280 | 139145779 | NM_198659    | chr3 | 139143294 | 139143898 |
|   | 3 | 139137280 | 139145779 | NM_198659    | chr3 | 139140228 | 139141234 |
| X |   | 138933653 | 138942154 | NM_008778    | chrX | 138940833 | 138941569 |
|   | 5 | 138846664 | 138855181 | NM_183025    | chr5 | 138846680 | 138847779 |
|   | 5 | 138847016 | 138855531 | NM_013844    | chr5 | 138846680 | 138847779 |
| X |   | 138803637 | 138812136 | BC053403     | chrX | 138811158 | 138811812 |
|   | 3 | 138673582 | 138682191 | NM_019571    | chr3 | 138678535 | 138679337 |
| X |   | 138634017 | 138646552 | NM_031258    | chrX | 138638417 | 138639194 |

|   |   |           |           |              |      |           |           |
|---|---|-----------|-----------|--------------|------|-----------|-----------|
|   | 5 | 138500043 | 138515732 | NM_001033416 | chr5 | 138510374 | 138511009 |
|   | 5 | 138504339 | 138512838 | NM_016964    | chr5 | 138510374 | 138511009 |
|   | 5 | 138099047 | 138107546 | NM_001024932 | chr5 | 138106034 | 138106688 |
|   | 4 | 138006744 | 138015243 | NM_178671    | chr4 | 138008032 | 138008520 |
|   | 5 | 137742656 | 137751167 | NM_031408    | chr5 | 137744217 | 137745046 |
|   | 1 | 137629009 | 137637849 | NM_133664    | chr1 | 137633973 | 137635068 |
|   | 4 | 137620873 | 137629372 | BC056179     | chr4 | 137621645 | 137622235 |
|   | 1 | 137609850 | 137618743 | NM_021467    | chr1 | 137615529 | 137616128 |
|   | 1 | 137530472 | 137538971 | AF092921     | chr1 | 137537838 | 137538440 |
|   | 5 | 137512065 | 137526956 | NM_009599    | chr5 | 137517305 | 137517893 |
|   | 5 | 137398325 | 137406834 | NM_201373    | chr5 | 137398315 | 137399905 |
|   | 5 | 137165235 | 137173811 | NM_024474    | chr5 | 137165731 | 137166344 |
|   | 1 | 137135224 | 137143723 | NM_053106    | chr1 | 137139745 | 137140447 |
| X |   | 136969086 | 136977585 | NM_010572    | chrX | 136971446 | 136972635 |
|   | 4 | 136860265 | 136868805 | NM_130879    | chr4 | 136865704 | 136866271 |
|   | 6 | 136789805 | 136805646 | NM_021714    | chr6 | 136803784 | 136804666 |
|   | 1 | 136457092 | 136465591 | NM_009307    | chr1 | 136464151 | 136465026 |
|   | 6 | 136446950 | 136455449 | BC081439     | chr6 | 136447369 | 136448345 |
|   | 4 | 136226393 | 136234894 | NM_007939    | chr4 | 136230984 | 136231740 |
|   | 5 | 136026300 | 136034799 | NM_172541    | chr5 | 136033161 | 136033771 |
|   | 5 | 136026300 | 136034799 | NM_172541    | chr5 | 136031682 | 136032644 |
| X |   | 136005320 | 136013819 | NM_011845    | chrX | 136010096 | 136010834 |
| X |   | 135796977 | 135805536 | NM_021463    | chrX | 135803512 | 135804444 |
| X |   | 135796977 | 135805536 | NM_021463    | chrX | 135802322 | 135803267 |
| X |   | 135722335 | 135730834 | NM_177750    | chrX | 135722706 | 135723449 |
|   | 4 | 135689600 | 135698105 | NM_008309    | chr4 | 135696428 | 135697195 |
|   | 4 | 135552145 | 135564368 | NM_009557    | chr4 | 135562774 | 135563629 |
|   | 7 | 135532015 | 135540514 | BC053453     | chr7 | 135535854 | 135537635 |
| X |   | 135403243 | 135411745 | NM_177921    | chrX | 135408755 | 135410563 |
| X |   | 135342416 | 135350915 | NM_153586    | chrX | 135342419 | 135343311 |
|   | 6 | 135322624 | 135335685 | NM_010128    | chr6 | 135332057 | 135332933 |
|   | 1 | 135249081 | 135257580 | BC007130     | chr1 | 135256280 | 135256877 |
| X |   | 135141192 | 135157524 | NM_016675    | chrX | 135156899 | 135157507 |
| X |   | 135141192 | 135157524 | NM_016675    | chrX | 135147183 | 135147917 |
|   | 1 | 135143421 | 135157272 | NM_178260    | chr1 | 135147104 | 135147829 |
|   | 5 | 134970529 | 134979217 | NM_010717    | chr5 | 134973141 | 134973780 |
|   | 4 | 134843197 | 134851696 | NM_001013756 | chr4 | 134850599 | 134851671 |
|   | 1 | 134758617 | 134767116 | AY362823     | chr1 | 134761378 | 134762003 |
|   | 4 | 134694998 | 134711912 | NM_022980    | chr4 | 134705839 | 134706428 |
| X |   | 134674047 | 134682753 | NM_011635    | chrX | 134678814 | 134681081 |
| X |   | 134575254 | 134583753 | NM_175541    | chrX | 134582290 | 134583222 |
| X |   | 134254869 | 134263368 | NM_013724    | chrX | 134261136 | 134262086 |
|   | 2 | 134243294 | 134251793 | NM_010403    | chr2 | 134244109 | 134245230 |
|   | 1 | 134137684 | 134146207 | NM_028778    | chr1 | 134143048 | 134144061 |
|   | 4 | 133802331 | 133819013 | NM_029759    | chr4 | 133807955 | 133808502 |
|   | 1 | 133784513 | 133800654 | NM_145977    | chr1 | 133793900 | 133794498 |
|   | 6 | 133726269 | 133739088 | AB256662     | chr6 | 133735384 | 133736019 |

|   |    |           |           |              |       |           |           |
|---|----|-----------|-----------|--------------|-------|-----------|-----------|
|   | 1  | 133420660 | 133429159 | NM_011924    | chr1  | 133425426 | 133426669 |
|   | 3  | 133169696 | 133178195 | NM_029953    | chr3  | 133173325 | 133173930 |
|   | 4  | 133157327 | 133165860 | NM_009097    | chr4  | 133158830 | 133159520 |
|   | 4  | 133026346 | 133034845 | AF268912     | chr4  | 133034153 | 133034646 |
|   | 6  | 132921038 | 132929537 | NM_207030    | chr6  | 132924878 | 132925533 |
| X |    | 132911913 | 132920462 | NM_030688    | chrX  | 132914140 | 132914740 |
|   | 6  | 132806835 | 132823630 | NM_207025    | chr6  | 132812388 | 132813068 |
|   | 6  | 132762594 | 132771093 | NM_207021    | chr6  | 132762900 | 132763421 |
|   | 6  | 132714423 | 132730324 | NM_199153    | chr6  | 132720381 | 132721109 |
|   | 6  | 132714423 | 132730324 | NM_199153    | chr6  | 132717051 | 132717612 |
|   | 6  | 132524669 | 132538034 | NM_011174    | chr6  | 132534796 | 132535572 |
|   | 6  | 132524669 | 132538034 | NM_011174    | chr6  | 132533077 | 132534146 |
| X |    | 132463985 | 132472690 | NM_007957    | chrX  | 132469593 | 132470212 |
| X |    | 132463985 | 132472690 | NM_007957    | chrX  | 132467034 | 132468065 |
| X |    | 132463985 | 132472690 | NM_007957    | chrX  | 132465820 | 132466621 |
|   | 6  | 132404930 | 132413429 | NM_001004160 | chr6  | 132409846 | 132410558 |
|   | 6  | 132404930 | 132413429 | NM_001004160 | chr6  | 132405805 | 132406421 |
|   | 2  | 131948666 | 131957285 | NM_138651    | chr2  | 131954368 | 131955361 |
|   | 6  | 131642080 | 131661756 | NM_207019    | chr6  | 131655860 | 131656500 |
|   | 6  | 131642080 | 131661756 | NM_207019    | chr6  | 131652214 | 131653000 |
| X |    | 131479409 | 131488004 | NM_212457    | chrX  | 131485854 | 131486518 |
|   | 7  | 131328111 | 131354053 | NM_009774    | chr7  | 131337490 | 131338050 |
|   | 3  | 131289883 | 131298382 | NM_027816    | chr3  | 131297513 | 131298147 |
|   | 3  | 131289883 | 131298382 | NM_027816    | chr3  | 131296840 | 131297398 |
|   | 6  | 131208574 | 131225742 | NM_008462    | chr6  | 131222045 | 131222835 |
| X |    | 130713648 | 130722160 | NM_183320    | chrX  | 130719484 | 130720126 |
|   | 6  | 130343903 | 130358667 | NM_016659    | chr6  | 130350215 | 130351035 |
| X |    | 130307762 | 130317118 | NM_031259    | chrX  | 130309951 | 130310626 |
|   | 6  | 130299015 | 130309319 | NM_010648    | chr6  | 130307345 | 130307966 |
|   | 5  | 130285032 | 130293668 | NM_010368    | chr5  | 130290242 | 130291381 |
|   | 6  | 130269640 | 130280101 | NM_013794    | chr6  | 130276306 | 130276973 |
|   | 2  | 130249198 | 130257697 | NM_207207    | chr2  | 130253867 | 130254466 |
|   | 6  | 130194832 | 130209508 | NM_014194    | chr6  | 130202090 | 130202744 |
|   | 6  | 130156230 | 130164805 | NM_010651    | chr6  | 130163123 | 130164304 |
|   | 2  | 130125755 | 130134254 | BC003944     | chr2  | 130130976 | 130131557 |
|   | 6  | 130093029 | 130101591 | NM_053151    | chr6  | 130101032 | 130101563 |
|   | 4  | 130058613 | 130067221 | NM_011520    | chr4  | 130062057 | 130062977 |
|   | 5  | 130033807 | 130042338 | NM_008095    | chr5  | 130040112 | 130040500 |
|   | 6  | 130028550 | 130038951 | NM_053153    | chr6  | 130036302 | 130036677 |
|   | 6  | 129990125 | 129998653 | NM_053154    | chr6  | 129996974 | 129998226 |
|   | 2  | 129981380 | 129989879 | NM_152993    | chr2  | 129987972 | 129988666 |
| X |    | 129926039 | 129934548 | NM_019865    | chrX  | 129930036 | 129931212 |
| X |    | 129926915 | 129935466 | NM_013482    | chrX  | 129930036 | 129931212 |
|   | 2  | 129880635 | 129889134 | NM_138655    | chr2  | 129887653 | 129888771 |
|   | 2  | 129880635 | 129889134 | NM_138655    | chr2  | 129880640 | 129881124 |
|   | 2  | 129808726 | 129817238 | NM_177726    | chr2  | 129810091 | 129811137 |
|   | 10 | 129744137 | 129760889 | NM_183264    | chr10 | 129758640 | 129759361 |

|   |    |           |           |              |       |           |           |
|---|----|-----------|-----------|--------------|-------|-----------|-----------|
| X |    | 129745187 | 129753769 | NM_010078    | chrX  | 129750989 | 129751765 |
|   | 6  | 129623778 | 129632382 | NM_010653    | chr6  | 129625969 | 129626758 |
|   | 10 | 129581328 | 129589827 | NM_146676    | chr10 | 129583818 | 129584575 |
|   | 1  | 129550959 | 129559458 | NM_001033041 | chr1  | 129558675 | 129559222 |
|   | 10 | 129527505 | 129536004 | NM_146674    | chr10 | 129530423 | 129532022 |
|   | 3  | 129518408 | 129527062 | NM_130450    | chr3  | 129525372 | 129526479 |
| X |    | 129505779 | 129514278 | NM_183319    | chrX  | 129511954 | 129512852 |
| X |    | 129505779 | 129514278 | NM_183319    | chrX  | 129510105 | 129510863 |
|   | 2  | 129486002 | 129494501 | NM_183262    | chr2  | 129486199 | 129486825 |
|   | 6  | 129470348 | 129478847 | NM_138648    | chr6  | 129470338 | 129471522 |
| X |    | 129399563 | 129408198 | NM_133196    | chrX  | 129405919 | 129406538 |
| X |    | 129399563 | 129408198 | NM_133196    | chrX  | 129404407 | 129405112 |
| X |    | 129249046 | 129259442 | NM_026838    | chrX  | 129253962 | 129254586 |
|   | 10 | 129070967 | 129079466 | NM_146285    | chr10 | 129072798 | 129073716 |
| X |    | 129032000 | 129040499 | BC118529     | chrX  | 129037376 | 129038051 |
| X |    | 129032000 | 129040499 | BC118529     | chrX  | 129031932 | 129033404 |
|   | 10 | 128784584 | 128793083 | NM_146729    | chr10 | 128790377 | 128791213 |
|   | 10 | 128784584 | 128793083 | NM_146729    | chr10 | 128788149 | 128788756 |
|   | 10 | 128718574 | 128727073 | NM_146284    | chr10 | 128720636 | 128721407 |
|   | 10 | 128635100 | 128643599 | NM_207620    | chr10 | 128638700 | 128639413 |
|   | 8  | 128549956 | 128558455 | NM_028908    | chr8  | 128556181 | 128558421 |
|   | 8  | 128549956 | 128558455 | NM_028908    | chr8  | 128554822 | 128555447 |
|   | 10 | 128534216 | 128542715 | NM_146863    | chr10 | 128536404 | 128537295 |
|   | 10 | 128512961 | 128521460 | NM_146267    | chr10 | 128519875 | 128520700 |
|   | 10 | 128512961 | 128521460 | NM_146267    | chr10 | 128514312 | 128516279 |
|   | 10 | 128480411 | 128488910 | NM_146318    | chr10 | 128485367 | 128485968 |
|   | 4  | 128380444 | 128388943 | NM_178110    | chr4  | 128383259 | 128383867 |
|   | 4  | 128223889 | 128232393 | BC071246     | chr4  | 128228299 | 128228891 |
|   | 4  | 128104518 | 128126793 | NM_205823    | chr4  | 128119809 | 128120582 |
|   | 7  | 128031960 | 128042066 | NM_009365    | chr7  | 128035362 | 128036075 |
|   | 3  | 127775941 | 127784637 | NM_145133    | chr3  | 127776452 | 127777347 |
|   | 7  | 127664295 | 127673971 | NM_146259    | chr7  | 127672385 | 127673352 |
|   | 7  | 127662849 | 127671745 | NM_172749    | chr7  | 127669615 | 127672369 |
|   | 7  | 127664295 | 127673971 | NM_146259    | chr7  | 127669615 | 127672369 |
|   | 7  | 127662849 | 127671745 | NM_172749    | chr7  | 127667498 | 127668340 |
|   | 7  | 127664295 | 127673971 | NM_146259    | chr7  | 127667498 | 127668340 |
|   | 8  | 127546960 | 127555459 | NM_175149    | chr8  | 127548786 | 127549881 |
|   | 3  | 127531250 | 127549816 | BC085187     | chr3  | 127538098 | 127538824 |
|   | 3  | 127533772 | 127551371 | NM_138593    | chr3  | 127538098 | 127538824 |
|   | 2  | 127418839 | 127427373 | NM_145532    | chr2  | 127421104 | 127422101 |
|   | 10 | 127246877 | 127255376 | NM_147222    | chr10 | 127250266 | 127251438 |
|   | 7  | 127210130 | 127219175 | NM_026999    | chr7  | 127212780 | 127213691 |
|   | 10 | 127198103 | 127206632 | NM_009040    | chr10 | 127198805 | 127199813 |
|   | 7  | 127175785 | 127190767 | NM_030226    | chr7  | 127175782 | 127176921 |
|   | 7  | 127133963 | 127142532 | NM_146202    | chr7  | 127136041 | 127136772 |
|   | 6  | 126899585 | 126910428 | NM_138594    | chr6  | 126905194 | 126905794 |
|   | 6  | 126902665 | 126911174 | NM_009013    | chr6  | 126905194 | 126905794 |

|   |    |           |           |              |       |           |           |
|---|----|-----------|-----------|--------------|-------|-----------|-----------|
|   | 7  | 126831069 | 126839568 | NM_145588    | chr7  | 126833042 | 126834048 |
|   | 10 | 126752052 | 126760721 | NM_008382    | chr10 | 126754289 | 126754955 |
|   | 6  | 126703271 | 126712460 | NM_013568    | chr6  | 126707164 | 126707828 |
|   | 10 | 126689221 | 126697720 | NM_033072    | chr10 | 126696697 | 126697122 |
|   | 7  | 126581120 | 126596331 | NM_007438    | chr7  | 126589445 | 126590402 |
|   | 6  | 126128041 | 126136540 | NM_008742    | chr6  | 126132823 | 126133614 |
|   | 4  | 125821174 | 125833612 | NM_011902    | chr4  | 125826359 | 125827011 |
|   | 5  | 125677188 | 125685707 | NM_019639    | chr5  | 125679520 | 125680114 |
|   | 8  | 125655595 | 125674481 | NM_144932    | chr8  | 125673071 | 125673886 |
|   | 4  | 125644048 | 125653492 | NM_172145    | chr4  | 125647198 | 125647919 |
|   | 6  | 125506595 | 125521258 | NM_011708    | chr6  | 125519734 | 125520591 |
|   | 6  | 125457813 | 125466379 | NM_007657    | chr6  | 125460312 | 125460897 |
|   | 8  | 125448105 | 125456625 | NM_026014    | chr8  | 125453590 | 125454208 |
|   | 6  | 125309374 | 125318047 | NM_011609    | chr6  | 125313349 | 125314064 |
|   | 2  | 124932699 | 124941675 | NM_023595    | chr2  | 124938948 | 124939790 |
|   | 6  | 124622747 | 124631294 | NM_145130    | chr6  | 124627894 | 124629073 |
|   | 4  | 124377203 | 124386658 | NM_177671    | chr4  | 124384542 | 124385214 |
|   | 4  | 124377203 | 124386658 | NM_177671    | chr4  | 124381569 | 124382223 |
|   | 4  | 124347079 | 124355586 | NM_153566    | chr4  | 124352538 | 124353517 |
|   | 9  | 123964372 | 123975648 | NM_009917    | chr9  | 123966240 | 123966695 |
|   | 5  | 123765078 | 123773622 | NM_198611    | chr5  | 123769196 | 123769844 |
|   | 9  | 123372515 | 123381084 | NM_030692    | chr9  | 123377741 | 123378675 |
|   | 9  | 123106988 | 123115487 | NM_001002267 | chr9  | 123107021 | 123108054 |
| X |    | 122855888 | 122864428 | NM_207250    | chrX  | 122863361 | 122864176 |
|   | 4  | 122823420 | 122831919 | NM_022033    | chr4  | 122823882 | 122824780 |
|   | 14 | 122789305 | 122797852 | NM_145467    | chr14 | 122792957 | 122793868 |
|   | 9  | 122708363 | 122720649 | NM_173364    | chr9  | 122714605 | 122715811 |
|   | 9  | 122708363 | 122720649 | NM_173364    | chr9  | 122710424 | 122711519 |
|   | 9  | 122699594 | 122708093 | BC055684     | chr9  | 122705591 | 122706750 |
|   | 9  | 122699594 | 122708093 | BC055684     | chr9  | 122704340 | 122704915 |
|   | 9  | 122699594 | 122708093 | BC055684     | chr9  | 122701699 | 122703899 |
|   | 9  | 122699594 | 122708093 | BC055684     | chr9  | 122700183 | 122701555 |
|   | 4  | 122612562 | 122621066 | NM_181859    | chr4  | 122619529 | 122620191 |
|   | 7  | 122456922 | 122465421 | NM_019430    | chr7  | 122457397 | 122458200 |
|   | 6  | 122416496 | 122425004 | BC096392     | chr6  | 122416829 | 122417476 |
| X |    | 122280797 | 122289460 | NM_177705    | chrX  | 122281513 | 122282582 |
|   | 6  | 121966417 | 121974916 | NM_008646    | chr6  | 121973688 | 121974288 |
|   | 6  | 121966417 | 121974916 | NM_008646    | chr6  | 121968361 | 121969328 |
|   | 6  | 121798160 | 121806729 | NM_008645    | chr6  | 121805514 | 121806700 |
|   | 6  | 121798160 | 121806729 | NM_008645    | chr6  | 121802106 | 121802748 |
|   | 9  | 121741162 | 121757669 | NM_021609    | chr9  | 121745369 | 121745954 |
|   | 3  | 121709560 | 121718203 | NM_010171    | chr3  | 121714720 | 121715453 |
|   | 2  | 121641587 | 121650470 | NM_212450    | chr2  | 121647769 | 121648356 |
|   | 2  | 121644302 | 121653533 | NM_008545    | chr2  | 121647769 | 121648356 |
|   | 11 | 121640351 | 121648892 | AB235902     | chr11 | 121647564 | 121648256 |
|   | 11 | 121640351 | 121648892 | AB235902     | chr11 | 121646413 | 121647470 |
|   | 11 | 121640351 | 121648892 | AB235902     | chr11 | 121644220 | 121644792 |

|    |           |           |           |       |           |           |
|----|-----------|-----------|-----------|-------|-----------|-----------|
| 11 | 121640351 | 121648892 | AB235902  | chr11 | 121640768 | 121641717 |
| 6  | 121595846 | 121604351 | NM_175628 | chr6  | 121598979 | 121599697 |
| 9  | 121430698 | 121439197 | AY572449  | chr9  | 121433030 | 121433696 |
| 5  | 121391188 | 121399687 | BC003980  | chr5  | 121396851 | 121397513 |
| 1  | 121347713 | 121356212 | NM_146103 | chr1  | 121354296 | 121355575 |
| 8  | 121163722 | 121172273 | NM_019707 | chr8  | 121168023 | 121168851 |
| 14 | 121123544 | 121132043 | BC017635  | chr14 | 121131209 | 121131703 |
| 2  | 121099343 | 121107960 | NM_007952 | chr2  | 121105018 | 121105607 |
| 5  | 120843633 | 120852145 | NM_029408 | chr5  | 120847897 | 120848558 |
| 5  | 120846731 | 120855266 | NM_145853 | chr5  | 120847897 | 120848558 |
| 11 | 120524063 | 120540059 | NM_153545 | chr11 | 120537041 | 120537998 |
| 1  | 120449491 | 120457999 | NM_023755 | chr1  | 120455092 | 120455849 |
| 11 | 120431475 | 120455637 | NM_024229 | chr11 | 120440685 | 120441542 |
| 4  | 120420134 | 120428640 | NM_028457 | chr4  | 120426391 | 120426967 |
| 11 | 120386444 | 120403692 | NM_133796 | chr11 | 120393671 | 120394348 |
| 6  | 120324077 | 120332576 | BC010717  | chr6  | 120329847 | 120330439 |
| 2  | 120294877 | 120303376 | NM_025475 | chr2  | 120300572 | 120301239 |
| 2  | 120298216 | 120313149 | NM_025657 | chr2  | 120300572 | 120301239 |
| 9  | 120146771 | 120155270 | NM_144557 | chr9  | 120151084 | 120151665 |
| 6  | 120000899 | 120010226 | NM_198703 | chr6  | 120003937 | 120004529 |
| 6  | 120000899 | 120010226 | NM_198703 | chr6  | 120002337 | 120003323 |
| 7  | 119989113 | 119997681 | NM_026458 | chr7  | 119989578 | 119990162 |
| 13 | 119827907 | 119836406 | NM_008002 | chr13 | 119829704 | 119830529 |
| 4  | 119782485 | 119790984 | NM_194060 | chr4  | 119785126 | 119785740 |
| 4  | 119590610 | 119599109 | L07911    | chr4  | 119596058 | 119597270 |
| 6  | 119534254 | 119542753 | BC002272  | chr6  | 119538047 | 119539034 |
| 7  | 119525075 | 119533724 | U53456    | chr7  | 119531339 | 119532959 |
| 6  | 119439390 | 119447904 | NM_133940 | chr6  | 119442861 | 119443597 |
| 7  | 119339618 | 119355380 | NM_146197 | chr7  | 119347587 | 119348179 |
| 6  | 119293853 | 119302352 | NM_172492 | chr6  | 119298320 | 119299064 |
| 9  | 119186174 | 119194738 | NM_010851 | chr9  | 119188486 | 119189331 |
| 2  | 119011265 | 119019773 | NM_019454 | chr2  | 119012028 | 119012619 |
|    | 118511727 | 118520329 | NM_138742 | chrX  | 118512437 | 118513677 |
| 11 | 118229385 | 118241176 | NM_029502 | chr11 | 118237288 | 118237873 |
| 13 | 118142169 | 118150818 | BC021881  | chr13 | 118144426 | 118145102 |
| 6  | 118102260 | 118110759 | NM_030165 | chr6  | 118109149 | 118109743 |
| 6  | 118102260 | 118110759 | NM_030165 | chr6  | 118104158 | 118104775 |
| 13 | 117996116 | 118004615 | BC022679  | chr13 | 117998777 | 117999405 |
| 4  | 117901269 | 117911310 | NM_020000 | chr4  | 117907425 | 117908016 |
| 3  | 117858299 | 117866940 | BC087942  | chr3  | 117858347 | 117858939 |
| 11 | 117796947 | 117805446 | NM_133757 | chr11 | 117804141 | 117804521 |
| 11 | 117796947 | 117805446 | NM_133757 | chr11 | 117802515 | 117803106 |
| 14 | 117117055 | 117126137 | NM_177753 | chr14 | 117125118 | 117125731 |
| 4  | 116992348 | 117000847 | NM_025739 | chr4  | 116993809 | 116994411 |
| 3  | 116958161 | 116966956 | NM_023245 | chr3  | 116960337 | 116961122 |
| 14 | 116931728 | 116940531 | NM_010024 | chr14 | 116938362 | 116939456 |
| 5  | 116705340 | 116713839 | BC024130  | chr5  | 116707848 | 116708609 |

X

|   |    |           |           |              |       |           |           |
|---|----|-----------|-----------|--------------|-------|-----------|-----------|
|   | 6  | 116590246 | 116600596 | NM_026057    | chr6  | 116591868 | 116592997 |
|   | 5  | 116547463 | 116555984 | NM_177759    | chr5  | 116555288 | 116555961 |
|   | 5  | 116547463 | 116555984 | NM_177759    | chr5  | 116551852 | 116552398 |
|   | 11 | 116403777 | 116414165 | NM_009591    | chr11 | 116413178 | 116413792 |
| X |    | 116401203 | 116409846 | BC126930     | chrX  | 116407442 | 116408187 |
|   | 10 | 116351991 | 116360490 | NM_001003950 | chr10 | 116359154 | 116360357 |
|   | 11 | 116303928 | 116312438 | BC029621     | chr11 | 116306275 | 116306890 |
|   | 5  | 116181085 | 116189584 | U39904       | chr5  | 116187531 | 116188635 |
|   | 11 | 116120304 | 116128815 | NM_016857    | chr11 | 116122608 | 116123171 |
|   | 6  | 115958084 | 115966583 | NM_026376    | chr6  | 115960706 | 115961787 |
|   | 6  | 115958084 | 115966583 | NM_026376    | chr6  | 115959549 | 115960256 |
|   | 12 | 115953327 | 115961826 | BC110689     | chr12 | 115957572 | 115958249 |
|   | 12 | 115953327 | 115961826 | BC110689     | chr12 | 115955448 | 115956071 |
|   | 11 | 115817345 | 115825844 | BC080751     | chr11 | 115820748 | 115821677 |
|   | 5  | 115814514 | 115828761 | NM_172719    | chr5  | 115820372 | 115821098 |
|   | 10 | 115699606 | 115708114 | NM_029928    | chr10 | 115701709 | 115702354 |
|   | 7  | 115613357 | 115621856 | BC067407     | chr7  | 115614345 | 115615024 |
|   | 12 | 115604181 | 115612680 | BC103785     | chr12 | 115608256 | 115609119 |
|   | 12 | 115604181 | 115612680 | BC103785     | chr12 | 115605777 | 115607089 |
|   | 6  | 115504323 | 115515938 | NM_199033    | chr6  | 115514294 | 115514894 |
|   | 8  | 115450020 | 115458562 | NM_130457    | chr8  | 115454575 | 115455387 |
|   | 11 | 115426094 | 115435019 | NM_027162    | chr11 | 115427966 | 115428985 |
|   | 10 | 115416509 | 115425039 | NM_011217    | chr10 | 115423373 | 115424142 |
|   | 13 | 115269971 | 115278470 | NM_177004    | chr13 | 115274701 | 115275369 |
|   | 12 | 115182025 | 115190524 | BC094065     | chr12 | 115188100 | 115188743 |
|   | 12 | 115182025 | 115190524 | BC094065     | chr12 | 115183552 | 115184523 |
|   | 12 | 115103130 | 115111630 | BC098504     | chr12 | 115104392 | 115105391 |
|   | 12 | 115029341 | 115037840 | BC018315     | chr12 | 115031129 | 115032281 |
|   | 12 | 114733921 | 114742420 | BC002091     | chr12 | 114735794 | 114736809 |
| X |    | 114595174 | 114603673 | NM_153109    | chrX  | 114599281 | 114600311 |
| X |    | 114595174 | 114603673 | NM_153109    | chrX  | 114597005 | 114597598 |
| X |    | 114538179 | 114546761 | BC111833     | chrX  | 114545852 | 114546413 |
| X |    | 114538179 | 114546761 | BC111833     | chrX  | 114543960 | 114544573 |
|   | 12 | 114539677 | 114548216 | BC003844     | chr12 | 114542029 | 114542915 |
|   | 12 | 114539677 | 114548216 | BC003844     | chr12 | 114540032 | 114540718 |
|   | 7  | 114503786 | 114512291 | NM_054084    | chr7  | 114504145 | 114505297 |
|   | 12 | 114410160 | 114418669 | BC085312     | chr12 | 114414408 | 114414999 |
|   | 5  | 114385376 | 114395491 | NM_001040691 | chr5  | 114391619 | 114392282 |
|   | 5  | 114386676 | 114395175 | NM_175016    | chr5  | 114391619 | 114392282 |
|   | 6  | 114090836 | 114099335 | NM_172890    | chr6  | 114095299 | 114095889 |
|   | 12 | 114071307 | 114079806 | AF466767     | chr12 | 114077525 | 114078133 |
|   | 14 | 113968089 | 113976759 | NM_175500    | chr14 | 113974283 | 113974963 |
|   | 13 | 113770680 | 113779179 | NM_010029    | chr13 | 113772406 | 113773021 |
|   | 2  | 113702561 | 113711060 | NM_010290    | chr2  | 113703000 | 113704153 |
|   | 1  | 113687874 | 113698465 | BC120567     | chr1  | 113691342 | 113691960 |
|   | 6  | 113657276 | 113665775 | NM_001033463 | chr6  | 113662972 | 113663570 |
|   | 9  | 113636078 | 113644577 | BC030468     | chr9  | 113644093 | 113644537 |



|    |           |           |              |       |           |           |
|----|-----------|-----------|--------------|-------|-----------|-----------|
| 9  | 113554400 | 113562927 | NM_011052    | chr9  | 113556025 | 113556629 |
| 12 | 113516310 | 113525095 | NM_029381    | chr12 | 113516319 | 113516911 |
| 13 | 113403329 | 113412197 | NM_029898    | chr13 | 113407569 | 113408188 |
| 2  | 113122575 | 113131074 | NM_010230    | chr2  | 113124725 | 113125310 |
| 8  | 113101118 | 113109617 | NM_146215    | chr8  | 113102710 | 113103105 |
| 12 | 113086397 | 113095219 | NM_013929    | chr12 | 113093333 | 113093925 |
| 6  | 113064814 | 113073313 | BC083184     | chr6  | 113065202 | 113065858 |
| 6  | 113037416 | 113045915 | NM_028385    | chr6  | 113043671 | 113044463 |
| 13 | 112876542 | 112885041 | L13103       | chr13 | 112883533 | 112884118 |
| 12 | 112548664 | 112557172 | BC126962     | chr12 | 112555091 | 112556018 |
| 8  | 112465678 | 112474177 | NM_017370    | chr8  | 112470713 | 112471230 |
| 12 | 112353364 | 112361889 | NM_011625    | chr12 | 112355636 | 112356220 |
| 2  | 112160348 | 112174866 | NM_026519    | chr2  | 112170218 | 112170868 |
| 12 | 112155077 | 112163578 | NM_026511    | chr12 | 112155764 | 112156296 |
| 4  | 112105527 | 112116947 | NM_177865    | chr4  | 112113840 | 112114829 |
| 2  | 112034680 | 112043224 | NM_207206    | chr2  | 112039688 | 112040816 |
| 2  | 111891039 | 111899538 | NM_146450    | chr2  | 111896060 | 111896739 |
| 2  | 111891039 | 111899538 | NM_146450    | chr2  | 111892149 | 111893249 |
| 2  | 111782436 | 111790935 | NM_146447    | chr2  | 111788904 | 111789598 |
| 2  | 111759411 | 111767910 | NM_207151    | chr2  | 111764795 | 111765829 |
| 2  | 111759411 | 111767910 | NM_207151    | chr2  | 111761098 | 111761890 |
| 2  | 111613064 | 111621563 | NM_146402    | chr2  | 111614649 | 111615275 |
| 2  | 111575152 | 111583651 | NM_146889    | chr2  | 111581462 | 111582620 |
| 2  | 111549090 | 111557589 | NM_146887    | chr2  | 111555417 | 111556263 |
| 5  | 111522512 | 111531924 | BC002262     | chr5  | 111525420 | 111526006 |
| 2  | 111420412 | 111428911 | NM_146888    | chr2  | 111422470 | 111423069 |
| 12 | 111339888 | 111348404 | BC086938     | chr12 | 111345869 | 111346387 |
| 2  | 111336627 | 111345126 | NM_146885    | chr2  | 111338258 | 111338938 |
| 9  | 111277929 | 111286428 | NM_172928    | chr9  | 111284921 | 111285715 |
| 2  | 111243981 | 111252480 | NM_001011773 | chr2  | 111252013 | 111252464 |
| 2  | 111219289 | 111227788 | NM_207254    | chr2  | 111220537 | 111221495 |
| 2  | 111087109 | 111095608 | NM_146394    | chr2  | 111093273 | 111094120 |
| 2  | 111068728 | 111077231 | NM_146396    | chr2  | 111069857 | 111070855 |
| X  | 111015956 | 111027025 | NM_207241    | chrX  | 111020802 | 111021385 |
| 5  | 110370162 | 110378677 | NM_172717    | chr5  | 110373701 | 110374302 |
| 5  | 110370162 | 110378677 | NM_172717    | chr5  | 110372581 | 110372926 |
| 5  | 110370162 | 110378677 | NM_172717    | chr5  | 110370517 | 110371629 |
| 12 | 109987425 | 109995924 | BC048191     | chr12 | 109987681 | 109988836 |
| 7  | 109907236 | 109915748 | NM_009516    | chr7  | 109912921 | 109913592 |
| 11 | 109905211 | 109913710 | NM_153145    | chr11 | 109907598 | 109908600 |
| 4  | 109847342 | 109855841 | AF041341     | chr4  | 109849792 | 109850410 |
| 2  | 109812678 | 109825277 | NM_026613    | chr2  | 109818302 | 109819263 |
| 11 | 109809407 | 109817906 | NM_013851    | chr11 | 109816246 | 109816862 |
| 11 | 109641613 | 109650115 | BC048675     | chr11 | 109643358 | 109644194 |
| 2  | 109487275 | 109497807 | NM_001048142 | chr2  | 109489902 | 109491191 |
| 4  | 109469957 | 109478484 | NM_172296    | chr4  | 109473275 | 109474236 |
| 2  | 109469539 | 109480432 | NM_007540    | chr2  | 109471332 | 109472001 |

|   |    |           |           |              |       |           |           |
|---|----|-----------|-----------|--------------|-------|-----------|-----------|
|   | 1  | 109411562 | 109420117 | NM_011459    | chr1  | 109417885 | 109418669 |
|   | 1  | 109332970 | 109345519 | NM_011111    | chr1  | 109336872 | 109337492 |
|   | 5  | 108928570 | 108937790 | NM_054071    | chr5  | 108932115 | 108932760 |
|   | 1  | 108908528 | 108917027 | NM_201376    | chr1  | 108910167 | 108910859 |
| X |    | 108813096 | 108821595 | NM_181579    | chrX  | 108818069 | 108818875 |
|   | 7  | 108657830 | 108666386 | NM_001011846 | chr7  | 108660872 | 108661560 |
|   | 7  | 108614675 | 108623174 | NM_146726    | chr7  | 108621917 | 108622781 |
|   | 3  | 108541051 | 108549550 | NM_017392    | chr3  | 108541350 | 108543340 |
|   | 8  | 108500009 | 108512504 | BC030451     | chr8  | 108501664 | 108502303 |
|   | 7  | 108435252 | 108443751 | NM_146372    | chr7  | 108441468 | 108442069 |
|   | 7  | 108406991 | 108423670 | NM_146743    | chr7  | 108421267 | 108422639 |
|   | 12 | 108416933 | 108425432 | NM_176964    | chr12 | 108418319 | 108418979 |
|   | 7  | 108397486 | 108405985 | NM_001011871 | chr7  | 108403558 | 108404707 |
|   | 8  | 108357997 | 108366518 | NM_026481    | chr8  | 108362419 | 108363022 |
|   | 7  | 108354471 | 108362970 | NM_001011858 | chr7  | 108354928 | 108355746 |
|   | 4  | 108339717 | 108348288 | NM_029571    | chr4  | 108346728 | 108347517 |
|   | 3  | 108336491 | 108344990 | NM_175183    | chr3  | 108337771 | 108338370 |
|   | 7  | 108329704 | 108338203 | NM_001011527 | chr7  | 108336273 | 108336983 |
|   | 7  | 108312645 | 108321144 | NM_146739    | chr7  | 108317993 | 108319737 |
|   | 7  | 108312645 | 108321144 | NM_146739    | chr7  | 108314143 | 108315306 |
|   | 7  | 108250503 | 108259002 | NM_146307    | chr7  | 108253794 | 108254539 |
|   | 7  | 108207750 | 108216249 | NM_146738    | chr7  | 108213770 | 108214655 |
|   | 7  | 108207750 | 108216249 | NM_146738    | chr7  | 108208516 | 108209258 |
|   | 9  | 108191368 | 108199883 | NM_008160    | chr9  | 108197495 | 108198502 |
|   | 8  | 108147859 | 108168075 | NM_030152    | chr8  | 108159581 | 108160541 |
|   | 7  | 108135657 | 108144156 | NM_146310    | chr7  | 108136933 | 108138076 |
|   | 7  | 108112352 | 108120851 | NM_146497    | chr7  | 108113918 | 108114902 |
|   | 4  | 108068649 | 108083259 | NM_172697    | chr4  | 108076851 | 108077437 |
|   | 4  | 108070996 | 108079961 | NM_011015    | chr4  | 108076851 | 108077437 |
|   | 8  | 108053803 | 108062534 | NM_022309    | chr8  | 108053986 | 108054578 |
|   | 7  | 108044814 | 108053313 | NM_146732    | chr7  | 108046667 | 108047261 |
|   | 7  | 107884246 | 107892745 | NM_146733    | chr7  | 107886137 | 107886766 |
|   | 9  | 107827662 | 107843887 | NM_023738    | chr9  | 107829621 | 107830034 |
|   | 3  | 107821934 | 107830565 | NM_145542    | chr3  | 107826697 | 107827421 |
|   | 7  | 107739820 | 107748319 | NM_146495    | chr7  | 107745919 | 107746669 |
|   | 3  | 107680569 | 107689129 | NM_026261    | chr3  | 107681092 | 107681687 |
|   | 9  | 107386046 | 107448373 | NM_008317    | chr9  | 107446548 | 107447487 |
|   | 8  | 107421211 | 107429738 | NM_144931    | chr8  | 107428146 | 107429329 |
|   | 8  | 107423936 | 107432447 | NM_053070    | chr8  | 107428146 | 107429329 |
|   | 9  | 107386046 | 107448373 | NM_008317    | chr9  | 107406226 | 107406877 |
|   | 9  | 107386046 | 107448373 | NM_008317    | chr9  | 107394714 | 107395359 |
|   | 1  | 107277514 | 107286013 | NM_009797    | chr1  | 107280649 | 107281310 |
|   | 8  | 107196058 | 107205411 | NM_181990    | chr8  | 107201558 | 107202201 |
| X |    | 107011184 | 107019683 | NM_008901    | chrX  | 107017857 | 107018861 |
|   | 7  | 106994622 | 107003121 | NM_029660    | chr7  | 107001864 | 107002472 |
|   | 7  | 106861479 | 106869978 | NM_147033    | chr7  | 106862230 | 106862861 |
|   | 2  | 106768731 | 106781236 | NM_001025102 | chr2  | 106777610 | 106778241 |

|   |    |           |           |              |       |           |           |
|---|----|-----------|-----------|--------------|-------|-----------|-----------|
|   | 7  | 106748084 | 106756583 | NM_206897    | chr7  | 106750140 | 106750735 |
|   | 9  | 106737469 | 106756047 | NM_029103    | chr9  | 106749460 | 106750107 |
|   | 11 | 106733986 | 106742485 | NM_025481    | chr11 | 106736145 | 106736775 |
|   | 7  | 106701849 | 106710348 | NM_001011542 | chr7  | 106708020 | 106708614 |
|   | 3  | 106669883 | 106678427 | NM_026013    | chr3  | 106676109 | 106676737 |
|   | 3  | 106673288 | 106681817 | NM_133869    | chr3  | 106676109 | 106676737 |
|   | 13 | 106558148 | 106567070 | NM_008308    | chr13 | 106559744 | 106560328 |
|   | 11 | 106301387 | 106309886 | NM_023913    | chr11 | 106303709 | 106304381 |
|   | 9  | 106293830 | 106302337 | NM_025371    | chr9  | 106298045 | 106298603 |
|   | 3  | 106036192 | 106044691 | BC038878     | chr3  | 106041830 | 106042668 |
|   | 12 | 105621257 | 105629764 | NM_009337    | chr12 | 105627014 | 105627767 |
|   | 2  | 105463735 | 105488220 | NM_013627    | chr2  | 105485347 | 105486356 |
|   | 2  | 105463735 | 105488220 | NM_013627    | chr2  | 105474758 | 105475461 |
|   | 13 | 105293209 | 105301979 | NM_030731    | chr13 | 105297862 | 105298729 |
|   | 13 | 105296290 | 105304821 | NM_025879    | chr13 | 105297862 | 105298729 |
|   | 12 | 105263627 | 105272126 | NM_053155    | chr12 | 105267628 | 105268240 |
| X |    | 105213541 | 105222078 | NM_016710    | chrX  | 105216148 | 105216757 |
|   | 3  | 104987130 | 104995636 | NM_153091    | chr3  | 104992814 | 104993599 |
|   | 7  | 104806349 | 104814848 | NM_147043    | chr7  | 104812241 | 104812891 |
| X |    | 104642984 | 104651483 | BC099952     | chrX  | 104647875 | 104648583 |
|   | 7  | 104538525 | 104555038 | NM_147050    | chr7  | 104546763 | 104547479 |
|   | 2  | 104541141 | 104549640 | NM_144804    | chr2  | 104543563 | 104544386 |
|   | 7  | 104518627 | 104527126 | NM_147049    | chr7  | 104522441 | 104523092 |
|   | 7  | 104503497 | 104511996 | NM_146312    | chr7  | 104509456 | 104510337 |
|   | 5  | 104281299 | 104289826 | NM_028794    | chr5  | 104286405 | 104287021 |
|   | 12 | 104093208 | 104102579 | NM_026687    | chr12 | 104093510 | 104094121 |
|   | 7  | 103893638 | 103902137 | NM_146822    | chr7  | 103897773 | 103898374 |
|   | 7  | 103893638 | 103902137 | NM_146822    | chr7  | 103894922 | 103895955 |
|   | 7  | 103884022 | 103892521 | NM_147084    | chr7  | 103885352 | 103886997 |
|   | 4  | 103859492 | 103868002 | NM_177259    | chr4  | 103863311 | 103863932 |
|   | 7  | 103846997 | 103855496 | NM_147118    | chr7  | 103853563 | 103854394 |
|   | 7  | 103846997 | 103855496 | NM_147118    | chr7  | 103850498 | 103851104 |
|   | 7  | 103846997 | 103855496 | NM_147118    | chr7  | 103847360 | 103848060 |
|   | 7  | 103805203 | 103813702 | NM_147119    | chr7  | 103810387 | 103810954 |
|   | 7  | 103805203 | 103813702 | NM_147119    | chr7  | 103808985 | 103809875 |
|   | 13 | 103807940 | 103816469 | NM_008533    | chr13 | 103808725 | 103809312 |
|   | 7  | 103612644 | 103621143 | NM_146821    | chr7  | 103613886 | 103614748 |
| X |    | 103603547 | 103612079 | NM_008409    | chrX  | 103610940 | 103611810 |
| X |    | 103603547 | 103612079 | NM_008409    | chrX  | 103604495 | 103605090 |
|   | 11 | 103584314 | 103592813 | NM_009521    | chr11 | 103586704 | 103587666 |
|   | 11 | 103563375 | 103571911 | NM_011719    | chr11 | 103567382 | 103568098 |
|   | 7  | 103451845 | 103460344 | NM_146841    | chr7  | 103454339 | 103454994 |
|   | 7  | 103418189 | 103426688 | NM_147100    | chr7  | 103425446 | 103426054 |
|   | 14 | 103405812 | 103414345 | NM_026047    | chr14 | 103408928 | 103409791 |
|   | 14 | 103351179 | 103359678 | NM_011143    | chr14 | 103358347 | 103359049 |
|   | 14 | 103351179 | 103359678 | NM_011143    | chr14 | 103357224 | 103358079 |
|   | 9  | 103304747 | 103313246 | BC062815     | chr9  | 103307919 | 103308764 |

|   |    |           |           |              |       |           |           |
|---|----|-----------|-----------|--------------|-------|-----------|-----------|
|   | 5  | 103276493 | 103284992 | AB005665     | chr5  | 103281044 | 103281844 |
|   | 7  | 103230514 | 103239013 | NM_146314    | chr7  | 103233757 | 103234535 |
|   | 7  | 103230514 | 103239013 | NM_146314    | chr7  | 103232861 | 103233565 |
| X |    | 103040863 | 103049362 | NM_199468    | chrX  | 103040891 | 103041511 |
|   | 7  | 102953341 | 102961840 | NM_147054    | chr7  | 102953811 | 102954707 |
|   | 7  | 102845312 | 102853811 | NM_147109    | chr7  | 102846683 | 102847633 |
|   | 12 | 102768819 | 102777318 | BC058432     | chr12 | 102771955 | 102772561 |
|   | 15 | 102758791 | 102767290 | NM_010463    | chr15 | 102762860 | 102763623 |
|   | 2  | 102699691 | 102708504 | NM_009851    | chr2  | 102706649 | 102707691 |
| X |    | 102685448 | 102693993 | NM_001007580 | chrX  | 102688666 | 102689353 |
|   | 11 | 102639968 | 102654885 | NM_080846    | chr11 | 102647113 | 102647978 |
|   | 9  | 102476144 | 102488074 | NM_181394    | chr9  | 102483184 | 102484095 |
|   | 7  | 102460063 | 102468562 | NM_146755    | chr7  | 102464458 | 102465415 |
|   | 10 | 102455948 | 102464465 | NM_172553    | chr10 | 102462062 | 102462883 |
|   | 2  | 102453499 | 102462441 | NM_001077514 | chr2  | 102461644 | 102462262 |
|   | 2  | 102453499 | 102462441 | NM_001077514 | chr2  | 102458251 | 102459040 |
| X |    | 102419853 | 102428352 | NM_001001176 | chrX  | 102423067 | 102423867 |
|   | 12 | 102371038 | 102379548 | NM_016856    | chr12 | 102376861 | 102377452 |
|   | 5  | 102307724 | 102316223 | NM_172882    | chr5  | 102314437 | 102315067 |
|   | 8  | 102302949 | 102311586 | NM_001039154 | chr8  | 102305306 | 102306095 |
|   | 3  | 102209571 | 102218102 | NM_009814    | chr3  | 102211211 | 102212281 |
| X |    | 102129562 | 102138061 | NM_009530    | chrX  | 102131737 | 102132615 |
|   | 13 | 102044663 | 102053168 | BC012687     | chr13 | 102045104 | 102047147 |
|   | 7  | 101933332 | 101959436 | NM_011644    | chr7  | 101938860 | 101939449 |
|   | 7  | 101936454 | 101945288 | NM_029211    | chr7  | 101938860 | 101939449 |
|   | 10 | 101917602 | 101926123 | NM_024435    | chr10 | 101925404 | 101926024 |
|   | 13 | 101842373 | 101850892 | NM_025369    | chr13 | 101844249 | 101845121 |
|   | 15 | 101568627 | 101577143 | NM_019956    | chr15 | 101570385 | 101571201 |
|   | 15 | 101519840 | 101528339 | NM_008476    | chr15 | 101523570 | 101524319 |
|   | 15 | 101472915 | 101481414 | NM_001004170 | chr15 | 101473644 | 101474467 |
|   | 2  | 101419587 | 101428142 | NM_009020    | chr2  | 101426747 | 101427350 |
|   | 2  | 101427326 | 101435829 | NM_026592    | chr2  | 101426747 | 101427350 |
|   | 15 | 101234436 | 101242982 | NM_033073    | chr15 | 101241625 | 101242365 |
|   | 12 | 101174156 | 101189691 | NM_145448    | chr12 | 101185711 | 101186341 |
| X |    | 101057376 | 101065875 | NM_053206    | chrX  | 101059768 | 101060371 |
|   | 15 | 100937789 | 100946288 | NM_144790    | chr15 | 100942499 | 100943113 |
|   | 11 | 100636108 | 100644607 | NM_011489    | chr11 | 100638407 | 100638904 |
|   | 3  | 100615745 | 100624247 | BC120719     | chr3  | 100617272 | 100618032 |
|   | 15 | 100513453 | 100521952 | NM_033612    | chr15 | 100519784 | 100520385 |
| X |    | 100401337 | 100409836 | NM_001077354 | chrX  | 100404495 | 100405357 |
|   | 6  | 100250322 | 100258904 | NM_019743    | chr6  | 100258368 | 100258864 |
|   | 1  | 100245530 | 100254059 | BC112423     | chr1  | 100251092 | 100251710 |
| X |    | 100181468 | 100190003 | NM_011276    | chrX  | 100184664 | 100185281 |
|   | 15 | 100049893 | 100063265 | NM_007497    | chr15 | 100051091 | 100051803 |
| X |    | 100022044 | 100030707 | NM_009197    | chrX  | 100028833 | 100029529 |
|   | 13 | 100024042 | 100032541 | NM_178716    | chr13 | 100025905 | 100026502 |
|   | 10 | 100016398 | 100024903 | NM_175128    | chr10 | 100023388 | 100024195 |

|   |    |           |           |              |       |           |           |
|---|----|-----------|-----------|--------------|-------|-----------|-----------|
|   | 10 | 100016398 | 100024903 | NM_175128    | chr10 | 100020168 | 100020769 |
|   | 11 | 99718010  | 99733373  | NM_027568    | chr11 | 99729271  | 99730005  |
|   | 7  | 99635247  | 99643746  | NM_146356    | chr7  | 99639069  | 99640219  |
|   | 7  | 99635247  | 99643746  | NM_146356    | chr7  | 99637276  | 99637959  |
|   | 6  | 99629730  | 99638234  | NM_025829    | chr6  | 99632238  | 99633104  |
|   | 13 | 99448412  | 99456911  | NM_008242    | chr13 | 99453247  | 99453942  |
|   | 13 | 99414620  | 99423124  | NM_145455    | chr13 | 99416863  | 99417526  |
|   | 15 | 99117273  | 99133814  | NM_018786    | chr15 | 99133050  | 99133781  |
|   | 9  | 98842543  | 98851042  | BC115956     | chr9  | 98848939  | 98849714  |
| X |    | 98844362  | 98852917  | NM_173021    | chrX  | 98846694  | 98847534  |
|   | 3  | 98772089  | 98780595  | NM_008295    | chr3  | 98777855  | 98778983  |
|   | 9  | 98759013  | 98767512  | NM_012020    | chr9  | 98765906  | 98766890  |
|   | 10 | 98530859  | 98540348  | NM_015737    | chr10 | 98538908  | 98539977  |
|   | 7  | 98529262  | 98537761  | BC089304     | chr7  | 98532049  | 98532672  |
| X |    | 98451989  | 98460882  | NM_007709    | chrX  | 98455305  | 98456024  |
| X |    | 98451989  | 98460882  | NM_007709    | chrX  | 98454161  | 98455290  |
|   | 5  | 98415171  | 98423670  | NM_029947    | chr5  | 98419409  | 98420016  |
|   | 15 | 98319508  | 98328007  | NM_001001807 | chr15 | 98325241  | 98325888  |
|   | 3  | 98301558  | 98310077  | NM_026328    | chr3  | 98303885  | 98304331  |
|   | 9  | 98293905  | 98302419  | NM_009034    | chr9  | 98300491  | 98301461  |
|   | 15 | 98082814  | 98091336  | NM_027304    | chr15 | 98089133  | 98089900  |
|   | 11 | 97866900  | 97875552  | NM_146028    | chr11 | 97868058  | 97868704  |
|   | 3  | 97850874  | 97859419  | NM_178080    | chr3  | 97855097  | 97855714  |
|   | 9  | 97840020  | 97848519  | NM_022319    | chr9  | 97846515  | 97847221  |
|   | 9  | 97840020  | 97848519  | NM_022319    | chr9  | 97842574  | 97843377  |
| X |    | 97836783  | 97845438  | NM_139144    | chrX  | 97841878  | 97844105  |
|   | 7  | 97789147  | 97797646  | NM_177696    | chr7  | 97791443  | 97792050  |
|   | 16 | 97763483  | 97772111  | NM_015775    | chr16 | 97763763  | 97764309  |
|   | 3  | 97708280  | 97716954  | NM_010232    | chr3  | 97712220  | 97712846  |
|   | 8  | 97655309  | 97663874  | NM_009142    | chr8  | 97662173  | 97662959  |
|   | 8  | 97628719  | 97637332  | NM_009137    | chr8  | 97636461  | 97637287  |
| X |    | 97626405  | 97642425  | NM_023144    | chrX  | 97635988  | 97636572  |
|   | 8  | 97549780  | 97558734  | NM_024191    | chr8  | 97555521  | 97556444  |
|   | 3  | 97494085  | 97502584  | NM_146275    | chr3  | 97502099  | 97502549  |
|   | 13 | 97483047  | 97491578  | NM_026173    | chr13 | 97485286  | 97486173  |
| X |    | 97482743  | 97491242  | BC057085     | chrX  | 97484080  | 97484942  |
|   | 13 | 97483047  | 97491578  | NM_026173    | chr13 | 97483885  | 97484760  |
| X |    | 97451247  | 97459966  | NM_018789    | chrX  | 97456240  | 97457022  |
|   | 7  | 97449098  | 97457597  | BC085127     | chr7  | 97454690  | 97455333  |
|   | 7  | 97452108  | 97460644  | NM_183251    | chr7  | 97454690  | 97455333  |
| X |    | 97259855  | 97268358  | NM_031384    | chrX  | 97262252  | 97263457  |
|   | 10 | 97116747  | 97125321  | NM_025724    | chr10 | 97123854  | 97124455  |
|   | 8  | 97097726  | 97106231  | NM_172410    | chr8  | 97098618  | 97099240  |
|   | 4  | 97067884  | 97076383  | D90173       | chr4  | 97075473  | 97076103  |
|   | 15 | 97069141  | 97077640  | NM_172293    | chr15 | 97072962  | 97073932  |
|   | 15 | 97072480  | 97081321  | NM_178114    | chr15 | 97072962  | 97073932  |
|   | 8  | 97055913  | 97070883  | NM_013602    | chr8  | 97068562  | 97069269  |

|   |    |          |                       |       |          |          |
|---|----|----------|-----------------------|-------|----------|----------|
|   | 8  | 97055913 | 97070883 NM_013602    | chr8  | 97060276 | 97060886 |
|   | 10 | 96989491 | 96998017 NM_008524    | chr10 | 96991161 | 96991816 |
|   | 8  | 96985100 | 96993940 NM_026116    | chr8  | 96986931 | 96987842 |
|   | 9  | 96917886 | 96926393 NM_138756    | chr9  | 96924981 | 96925664 |
|   | 15 | 96881491 | 96889990 NM_027052    | chr15 | 96887836 | 96888599 |
|   | 15 | 96881491 | 96889990 NM_027052    | chr15 | 96882832 | 96884618 |
|   | 8  | 96693967 | 96702943 NM_010308    | chr8  | 96696333 | 96696947 |
|   | 3  | 96677037 | 96685548 NM_027241    | chr3  | 96680272 | 96680830 |
|   | 11 | 96659966 | 96668465 NM_019877    | chr11 | 96660655 | 96661209 |
| X |    | 96612782 | 96621306 NM_177746    | chrX  | 96619320 | 96619932 |
|   | 12 | 96168509 | 96177008 AY495669     | chr12 | 96175768 | 96176422 |
|   | 12 | 96168509 | 96177008 AY495669     | chr12 | 96172823 | 96173552 |
|   | 6  | 96072617 | 96081315 NM_182808    | chr6  | 96077126 | 96078161 |
|   | 3  | 96008696 | 96017486 NM_023210    | chr3  | 96015284 | 96016167 |
|   | 13 | 95970326 | 95978825 NM_011021    | chr13 | 95974677 | 95975372 |
|   | 3  | 95901664 | 95910181 BC067054     | chr3  | 95904543 | 95905639 |
|   | 8  | 95843207 | 95852857 NM_009209    | chr8  | 95851996 | 95852764 |
|   | 8  | 95843207 | 95852857 NM_009209    | chr8  | 95849560 | 95850241 |
|   | 1  | 95844899 | 95853398 NM_173772    | chr1  | 95845344 | 95845974 |
|   | 5  | 95707855 | 95724394 BC099941     | chr5  | 95723603 | 95724384 |
|   | 11 | 95652385 | 95661307 NM_001038664 | chr11 | 95656741 | 95657409 |
|   | 11 | 95655751 | 95664250 NM_025659    | chr11 | 95656741 | 95657409 |
|   | 4  | 95561128 | 95575558 NM_145548    | chr4  | 95567566 | 95568166 |
|   | 4  | 95561128 | 95575558 NM_145548    | chr4  | 95563328 | 95564338 |
|   | 3  | 95361249 | 95371021 NM_133858    | chr3  | 95367711 | 95368678 |
|   | 3  | 95364710 | 95373480 NM_173347    | chr3  | 95367711 | 95368678 |
| X |    | 95332849 | 95341855 NM_010110    | chrX  | 95338179 | 95338794 |
|   | 1  | 95270141 | 95278656 BC035301     | chr1  | 95274829 | 95275539 |
|   | 13 | 95268823 | 95277322 BC040389     | chr13 | 95273831 | 95274447 |
| X |    | 95239384 | 95247883 NM_199018    | chrX  | 95244857 | 95245558 |
|   | 3  | 95216893 | 95233764 NM_027206    | chr3  | 95226941 | 95227656 |
|   | 9  | 95213510 | 95222074 NM_018763    | chr9  | 95220437 | 95221041 |
|   | 3  | 95213514 | 95222080 NM_028134    | chr3  | 95219155 | 95220326 |
|   | 3  | 95216893 | 95233764 NM_027206    | chr3  | 95219155 | 95220326 |
|   | 9  | 95213510 | 95222074 NM_018763    | chr9  | 95214703 | 95215319 |
|   | 11 | 94959854 | 94968353 NM_007867    | chr11 | 94965731 | 94966545 |
|   | 1  | 94797601 | 94812181 NM_022320    | chr1  | 94803169 | 94803823 |
|   | 3  | 94478623 | 94487212 NM_177250    | chr3  | 94486706 | 94487810 |
|   | 9  | 94473270 | 94481769 NM_177909    | chr9  | 94480475 | 94481079 |
|   | 1  | 94432245 | 94440744 NM_146491    | chr1  | 94435521 | 94436453 |
|   | 1  | 94412738 | 94429426 NM_146490    | chr1  | 94424275 | 94424895 |
|   | 11 | 94375157 | 94383663 NM_007689    | chr11 | 94377611 | 94378370 |
|   | 10 | 94371767 | 94380266 NM_018797    | chr10 | 94373752 | 94374639 |
|   | 15 | 94365840 | 94374399 NM_029926    | chr15 | 94371344 | 94372002 |
|   | 15 | 94366655 | 94377670 NM_172437    | chr15 | 94371344 | 94372002 |
|   | 5  | 94336461 | 94345470 NM_007635    | chr5  | 94336609 | 94337219 |
|   | 1  | 94301665 | 94317025 NM_024197    | chr1  | 94314404 | 94315277 |

|   |    |          |          |              |       |          |          |
|---|----|----------|----------|--------------|-------|----------|----------|
|   | 13 | 93893012 | 93901511 | NM_011582    | chr13 | 93896358 | 93896980 |
|   | 11 | 93806181 | 93814760 | NM_027569    | chr11 | 93810927 | 93811997 |
|   | 8  | 93712942 | 93721441 | NM_177224    | chr8  | 93718546 | 93719285 |
|   | 13 | 93629052 | 93637563 | NM_173392    | chr13 | 93632540 | 93633249 |
|   | 5  | 93578217 | 93586808 | NM_007644    | chr5  | 93580127 | 93580957 |
|   | 16 | 93565755 | 93574297 | NM_173047    | chr16 | 93566197 | 93567185 |
|   | 17 | 93497312 | 93506212 | NM_009625    | chr17 | 93502902 | 93504703 |
|   | 5  | 93400768 | 93409317 | NM_008599    | chr5  | 93407337 | 93408105 |
|   | 1  | 93364971 | 93373985 | NM_001039126 | chr1  | 93370662 | 93371457 |
| X |    | 93269315 | 93281146 | NM_001033361 | chrX  | 93280292 | 93281208 |
|   | 2  | 93260751 | 93269335 | NM_007656    | chr2  | 93262446 | 93263422 |
|   | 2  | 93132790 | 93141346 | NM_183180    | chr2  | 93134019 | 93134721 |
|   | 1  | 93120451 | 93131283 | NM_016717    | chr1  | 93129970 | 93130568 |
|   | 3  | 93098569 | 93110463 | NM_025420    | chr3  | 93100236 | 93100858 |
|   | 3  | 93009134 | 93017633 | NM_001039594 | chr3  | 93011318 | 93012057 |
|   | 3  | 92934190 | 92942689 | NM_028628    | chr3  | 92937152 | 92937869 |
|   | 10 | 92877195 | 92885735 | NM_008517    | chr10 | 92882980 | 92884078 |
|   | 4  | 92825030 | 92833529 | NM_026954    | chr4  | 92829670 | 92830374 |
|   | 6  | 92775982 | 92784481 | NM_175209    | chr6  | 92783102 | 92784218 |
|   | 3  | 92739830 | 92748329 | NM_026822    | chr3  | 92740525 | 92741460 |
|   | 3  | 92444590 | 92453089 | NM_011472    | chr3  | 92448371 | 92449371 |
|   | 3  | 92396108 | 92405188 | NM_011469    | chr3  | 92399038 | 92399661 |
|   | 16 | 92344818 | 92360984 | AY325904     | chr16 | 92354785 | 92355440 |
|   | 13 | 92348625 | 92357124 | NM_198415    | chr13 | 92349852 | 92350550 |
| X |    | 92292764 | 92301281 | NM_010833    | chrX  | 92297191 | 92298150 |
|   | 16 | 92207801 | 92216300 | NM_029252    | chr16 | 92213613 | 92214337 |
|   | 12 | 92189494 | 92197993 | NM_175367    | chr12 | 92193175 | 92193518 |
|   | 3  | 92166558 | 92175069 | NM_008508    | chr3  | 92168233 | 92168988 |
|   | 9  | 92048019 | 92056553 | AF159593     | chr9  | 92048541 | 92049512 |
|   | 15 | 91950308 | 91958873 | NM_007727    | chr15 | 91952170 | 91952783 |
|   | 16 | 91941180 | 91949694 | NM_017391    | chr16 | 91942015 | 91942635 |
|   | 1  | 91843249 | 91851748 | NM_139152    | chr1  | 91844348 | 91844897 |
|   | 2  | 91722057 | 91730556 | NM_007699    | chr2  | 91723124 | 91723851 |
|   | 16 | 91529500 | 91541831 | NM_010256    | chr16 | 91533114 | 91534154 |
|   | 11 | 91391122 | 91399645 | NM_028547    | chr11 | 91398656 | 91399248 |
|   | 11 | 91391122 | 91399645 | NM_028547    | chr11 | 91391947 | 91392579 |
|   | 4  | 91296085 | 91304592 | BC033506     | chr4  | 91297373 | 91297969 |
|   | 16 | 91289102 | 91297601 | NM_008349    | chr16 | 91290609 | 91291705 |
| X |    | 91226857 | 91235401 | NM_178753    | chrX  | 91228374 | 91229395 |
|   | 9  | 91170104 | 91178603 | D78174       | chr9  | 91172694 | 91173458 |
|   | 9  | 91160877 | 91169376 | NM_009576    | chr9  | 91160889 | 91162148 |
|   | 9  | 91160951 | 91169704 | NM_009573    | chr9  | 91160889 | 91162148 |
|   | 6  | 91079824 | 91088330 | NM_018815    | chr6  | 91086991 | 91087658 |
|   | 2  | 90891636 | 90900238 | NM_011355    | chr2  | 90897267 | 90897931 |
|   | 8  | 90847100 | 90855700 | NM_033327    | chr8  | 90848849 | 90849895 |
| X |    | 90615953 | 90625496 | BC115707     | chrX  | 90624263 | 90625092 |
|   | 10 | 90509998 | 90518569 | NM_001042558 | chr10 | 90516516 | 90517559 |

|   |    |          |          |              |       |          |          |
|---|----|----------|----------|--------------|-------|----------|----------|
|   | 11 | 90448263 | 90456762 | NM_199008    | chr11 | 90453420 | 90454070 |
|   | 11 | 90451653 | 90460174 | NM_011505    | chr11 | 90453420 | 90454070 |
|   | 3  | 90142723 | 90161120 | NM_022314    | chr3  | 90147662 | 90148474 |
|   | 1  | 90034388 | 90042919 | NM_008299    | chr1  | 90035887 | 90036645 |
|   | 6  | 89999846 | 90008345 | NM_053218    | chr6  | 90004941 | 90007900 |
|   | 6  | 89999846 | 90008345 | NM_053218    | chr6  | 90001375 | 90003591 |
|   | 6  | 89981392 | 89989891 | NM_053219    | chr6  | 89986483 | 89988486 |
|   | 6  | 89981392 | 89989891 | NM_053219    | chr6  | 89982097 | 89984437 |
|   | 6  | 89935675 | 89944174 | NM_053229    | chr6  | 89941251 | 89942275 |
|   | 8  | 89931815 | 89940314 | BC090397     | chr8  | 89938160 | 89938830 |
| X |    | 89921831 | 89930493 | NM_211138    | chrX  | 89926681 | 89927280 |
|   | 3  | 89911297 | 89919824 | NM_172530    | chr3  | 89919384 | 89919760 |
|   | 3  | 89911297 | 89919824 | NM_172530    | chr3  | 89918321 | 89919119 |
|   | 9  | 89910063 | 89918655 | NM_001039147 | chr9  | 89911567 | 89912530 |
|   | 18 | 89900835 | 89909334 | NM_001039173 | chr18 | 89903933 | 89904715 |
|   | 16 | 89847187 | 89855686 | NM_009384    | chr16 | 89854449 | 89855642 |
|   | 16 | 89847187 | 89855686 | NM_009384    | chr16 | 89851947 | 89853550 |
|   | 6  | 89833534 | 89842033 | NM_053220    | chr6  | 89835370 | 89835980 |
|   | 2  | 89788202 | 89796701 | NM_146474    | chr2  | 89792823 | 89793451 |
|   | 9  | 89701668 | 89710314 | NM_011245    | chr9  | 89708490 | 89709301 |
|   | 15 | 89667070 | 89675573 | NM_018803    | chr15 | 89673848 | 89674462 |
|   | 15 | 89667070 | 89675573 | NM_018803    | chr15 | 89669694 | 89670434 |
|   | 5  | 89652074 | 89661184 | NM_027530    | chr5  | 89658435 | 89659309 |
|   | 6  | 89558744 | 89567256 | NM_025351    | chr6  | 89560538 | 89561438 |
| X |    | 89533241 | 89541864 | NM_007492    | chrX  | 89539548 | 89540593 |
| X |    | 89533241 | 89541864 | NM_007492    | chrX  | 89538326 | 89539076 |
|   | 3  | 89510188 | 89527940 | NM_026869    | chr3  | 89525989 | 89526329 |
|   | 2  | 89374064 | 89382563 | NM_146788    | chr2  | 89377376 | 89378282 |
|   | 12 | 89302456 | 89310955 | BC060719     | chr12 | 89305965 | 89307103 |
|   | 2  | 89281473 | 89289972 | NM_146455    | chr2  | 89283515 | 89284142 |
|   | 2  | 89238617 | 89247116 | NM_146808    | chr2  | 89245038 | 89245756 |
|   | 2  | 89205417 | 89213916 | NM_146790    | chr2  | 89206738 | 89207518 |
|   | 1  | 89152213 | 89160723 | NM_146112    | chr1  | 89152555 | 89153241 |
|   | 2  | 89138688 | 89147187 | NM_146972    | chr2  | 89140381 | 89141056 |
|   | 17 | 89106502 | 89115001 | NM_013523    | chr17 | 89107098 | 89107712 |
|   | 2  | 89095608 | 89110429 | NM_146454    | chr2  | 89107003 | 89107779 |
|   | 1  | 89089534 | 89098049 | NM_028889    | chr1  | 89094813 | 89095617 |
|   | 16 | 89033998 | 89049310 | BC048518     | chr16 | 89045238 | 89046281 |
|   | 16 | 89033998 | 89049310 | BC048518     | chr16 | 89039616 | 89040513 |
|   | 1  | 88983697 | 88993527 | NM_021306    | chr1  | 88984980 | 88985986 |
|   | 2  | 88910850 | 88919349 | NM_146902    | chr2  | 88917357 | 88917993 |
|   | 15 | 88910873 | 88919372 | NM_027905    | chr15 | 88913447 | 88914048 |
|   | 2  | 88822341 | 88830840 | NM_146901    | chr2  | 88824198 | 88824845 |
|   | 4  | 88750924 | 88759423 | NM_001040654 | chr4  | 88756799 | 88758067 |
|   | 4  | 88750924 | 88759423 | NM_001040654 | chr4  | 88755467 | 88756227 |
|   | 2  | 88753307 | 88761806 | NM_207140    | chr2  | 88754683 | 88755309 |
|   | 2  | 88708731 | 88717230 | NM_146461    | chr2  | 88710123 | 88711077 |



|   |    |          |          |              |       |          |          |
|---|----|----------|----------|--------------|-------|----------|----------|
|   | 6  | 88684125 | 88692968 | NM_011844    | chr6  | 88687651 | 88688239 |
|   | 2  | 88646791 | 88655290 | NM_146463    | chr2  | 88652325 | 88653036 |
|   | 16 | 88637988 | 88646494 | NM_010671    | chr16 | 88644807 | 88645472 |
|   | 16 | 88641706 | 88650223 | NM_054100    | chr16 | 88644807 | 88645472 |
|   | 3  | 88631643 | 88644854 | NM_016899    | chr3  | 88641770 | 88642378 |
|   | 16 | 88637988 | 88646494 | NM_010671    | chr16 | 88640454 | 88641389 |
|   | 2  | 88612012 | 88620511 | NM_146462    | chr2  | 88614794 | 88615412 |
|   | 5  | 88607208 | 88618756 | NM_019878    | chr5  | 88612642 | 88612991 |
|   | 15 | 88601285 | 88609784 | BC092524     | chr15 | 88608749 | 88609478 |
|   | 15 | 88601285 | 88609784 | BC092524     | chr15 | 88607465 | 88608063 |
|   | 6  | 88590587 | 88599086 | NM_029013    | chr6  | 88592487 | 88593392 |
|   | 2  | 88566653 | 88575152 | NM_001005227 | chr2  | 88568397 | 88568993 |
|   | 2  | 88555013 | 88563512 | NM_146458    | chr2  | 88556460 | 88557118 |
|   | 16 | 88534156 | 88542655 | NM_027105    | chr16 | 88534820 | 88535732 |
|   | 2  | 88527937 | 88536436 | NM_001005225 | chr2  | 88529751 | 88530867 |
|   | 12 | 88485798 | 88498389 | NM_178657    | chr12 | 88496381 | 88497915 |
|   | 17 | 88432584 | 88441083 | NM_028658    | chr17 | 88432811 | 88433590 |
|   | 6  | 88409633 | 88418180 | NM_023060    | chr6  | 88412871 | 88413518 |
|   | 2  | 88281573 | 88290072 | NM_146823    | chr2  | 88287778 | 88288771 |
| X |    | 88266553 | 88275052 | NM_010759    | chrX  | 88271369 | 88275010 |
| X |    | 88266553 | 88275052 | NM_010759    | chrX  | 88270488 | 88271318 |
| X |    | 88266553 | 88275052 | NM_010759    | chrX  | 88268716 | 88269461 |
|   | 2  | 88256181 | 88264680 | NM_146529    | chr2  | 88261961 | 88262650 |
|   | 4  | 88145588 | 88168499 | NM_008336    | chr4  | 88163420 | 88164015 |
|   | 1  | 87998811 | 88007310 | BC028964     | chr1  | 88002471 | 88003118 |
|   | 2  | 87979718 | 87988217 | NM_146531    | chr2  | 87985141 | 87985729 |
|   | 8  | 87944233 | 87975939 | NM_010764    | chr8  | 87960436 | 87960939 |
|   | 2  | 87892274 | 87908824 | NM_146641    | chr2  | 87901871 | 87902490 |
|   | 18 | 87884543 | 87893042 | AF033381     | chr18 | 87891231 | 87891833 |
|   | 3  | 87876989 | 87885488 | NM_011832    | chr3  | 87881715 | 87882401 |
|   | 17 | 87877401 | 87885935 | NM_010830    | chr17 | 87879724 | 87880187 |
|   | 8  | 87866301 | 87874853 | NM_008416    | chr8  | 87870603 | 87871278 |
|   | 1  | 87847114 | 87855631 | NM_027300    | chr1  | 87846698 | 87847173 |
| X |    | 87578474 | 87587073 | NM_031171    | chrX  | 87583861 | 87585024 |
| X |    | 87578474 | 87587073 | NM_031171    | chrX  | 87580369 | 87583702 |
| X |    | 87578474 | 87587073 | NM_031171    | chrX  | 87578488 | 87579893 |
|   | 8  | 87550443 | 87558958 | NM_010499    | chr8  | 87551657 | 87552327 |
|   | 3  | 87515700 | 87524208 | NM_183222    | chr3  | 87521980 | 87522697 |
|   | 2  | 87470705 | 87479204 | NM_146660    | chr2  | 87472213 | 87473229 |
|   | 2  | 87444461 | 87452960 | NM_146351    | chr2  | 87446256 | 87447416 |
|   | 2  | 87423304 | 87431803 | NM_146658    | chr2  | 87430783 | 87431416 |
|   | 2  | 87402229 | 87410728 | NM_146838    | chr2  | 87408138 | 87408874 |
|   | 7  | 87366623 | 87375273 | NM_011661    | chr7  | 87371102 | 87371699 |
|   | 2  | 87303297 | 87311796 | NM_178249    | chr2  | 87308567 | 87309639 |
|   | 8  | 87299469 | 87308195 | NM_007578    | chr8  | 87303466 | 87304847 |
|   | 10 | 87282867 | 87297027 | NM_184052    | chr10 | 87294690 | 87295649 |
|   | 10 | 87282867 | 87297027 | NM_184052    | chr10 | 87293231 | 87294418 |

|   |    |          |                       |       |          |          |
|---|----|----------|-----------------------|-------|----------|----------|
|   | 2  | 87290755 | 87299257 NM_178250    | chr2  | 87291031 | 87291977 |
|   | 10 | 87282867 | 87297027 NM_184052    | chr10 | 87290342 | 87292826 |
|   | 2  | 87166373 | 87174872 NM_146348    | chr2  | 87172264 | 87173008 |
|   | 2  | 87103603 | 87112102 NM_207632    | chr2  | 87109494 | 87110916 |
|   | 2  | 87046778 | 87055277 NM_146297    | chr2  | 87049831 | 87050413 |
|   | 2  | 86948999 | 86957498 NM_146593    | chr2  | 86953121 | 86953629 |
|   | 2  | 86934659 | 86943158 NM_146769    | chr2  | 86939173 | 86939844 |
|   | 2  | 86796810 | 86805309 NM_207154    | chr2  | 86802819 | 86803852 |
|   | 2  | 86796810 | 86805309 NM_207154    | chr2  | 86797910 | 86798662 |
|   | 2  | 86777134 | 86785633 NM_146594    | chr2  | 86779076 | 86779662 |
|   | 11 | 86621273 | 86629832 NM_026191    | chr11 | 86626933 | 86627889 |
|   | 2  | 86456796 | 86465295 NM_146590    | chr2  | 86459830 | 86460613 |
|   | 7  | 86396520 | 86405019 NM_146618    | chr7  | 86403095 | 86403677 |
|   | 11 | 86355186 | 86367477 NM_019756    | chr11 | 86361245 | 86361852 |
|   | 11 | 86358453 | 86366969 NM_028259    | chr11 | 86361245 | 86361852 |
|   | 2  | 86282080 | 86290579 NM_146405    | chr2  | 86283150 | 86283754 |
|   | 7  | 86268758 | 86277257 NM_146619    | chr7  | 86269543 | 86270158 |
| X |    | 86183072 | 86191571 NM_001033880 | chrX  | 86184237 | 86184901 |
|   | 2  | 86173750 | 86182249 NM_207563    | chr2  | 86175903 | 86176839 |
|   | 12 | 86152888 | 86165679 BC079861     | chr12 | 86155793 | 86156386 |
|   | 7  | 86143049 | 86151548 NM_001011520 | chr7  | 86147298 | 86147705 |
|   | 11 | 86070242 | 86079763 NM_027421    | chr11 | 86073283 | 86074368 |
|   | 2  | 86027309 | 86043672 NM_147014    | chr2  | 86036706 | 86037418 |
|   | 2  | 86016048 | 86024547 NM_146582    | chr2  | 86018099 | 86018819 |
|   | 17 | 85946258 | 85954757 NM_030133    | chr17 | 85950520 | 85951447 |
|   | 2  | 85930001 | 85938500 NM_001011784 | chr2  | 85931423 | 85932198 |
|   | 2  | 85841323 | 85849822 NM_001011872 | chr2  | 85846421 | 85847100 |
|   | 2  | 85802617 | 85811116 NM_146579    | chr2  | 85808044 | 85809096 |
|   | 2  | 85778681 | 85795157 NM_001011759 | chr2  | 85784527 | 85785369 |
|   | 6  | 85773022 | 85781521 NM_053097    | chr6  | 85773162 | 85773637 |
|   | 2  | 85745904 | 85754403 NM_001011774 | chr2  | 85751444 | 85752470 |
| X |    | 85659909 | 85668408 NM_008821    | chrX  | 85661142 | 85662149 |
|   | 15 | 85647000 | 85655499 NM_011105    | chr15 | 85647015 | 85648338 |
|   | 15 | 85636316 | 85644815 NM_197998    | chr15 | 85642955 | 85645379 |
|   | 2  | 85640129 | 85649075 NM_147015    | chr2  | 85641948 | 85642960 |
|   | 2  | 85580313 | 85588812 NM_146571    | chr2  | 85585794 | 85586404 |
|   | 2  | 85580313 | 85588812 NM_146571    | chr2  | 85583395 | 85584224 |
|   | 2  | 85558714 | 85567213 NM_146568    | chr2  | 85560323 | 85561443 |
|   | 2  | 85516246 | 85524745 NM_146572    | chr2  | 85522355 | 85523363 |
|   | 2  | 85484270 | 85492769 NM_146866    | chr2  | 85489054 | 85490165 |
|   | 12 | 85453588 | 85462110 NM_007701    | chr12 | 85454080 | 85455113 |
|   | 2  | 85385381 | 85393880 NM_146436    | chr2  | 85385405 | 85386018 |
|   | 11 | 85121449 | 85130069 NM_016910    | chr11 | 85127038 | 85128582 |
|   | 18 | 85083193 | 85091717 NM_025969    | chr18 | 85083885 | 85084884 |
|   | 7  | 84785960 | 84794465 NM_146416    | chr7  | 84788988 | 84789892 |
|   | 2  | 84685032 | 84693531 NM_199223    | chr2  | 84686965 | 84687572 |
|   | 15 | 84485010 | 84499885 BC024991     | chr15 | 84497083 | 84497856 |

|   |    |          |          |              |       |          |          |
|---|----|----------|----------|--------------|-------|----------|----------|
|   | 7  | 84283600 | 84292144 | NM_007488    | chr7  | 84291064 | 84291602 |
|   | 15 | 83989594 | 83998102 | NM_054088    | chr15 | 83995703 | 83996846 |
|   | 8  | 83773077 | 83782225 | NM_021356    | chr8  | 83776054 | 83776888 |
|   | 6  | 83670922 | 83679429 | NM_011912    | chr6  | 83675775 | 83676547 |
|   | 8  | 83609763 | 83618262 | BC021922     | chr8  | 83614834 | 83615685 |
|   | 9  | 83600319 | 83608955 | NM_148941    | chr9  | 83600882 | 83601542 |
|   | 7  | 83526616 | 83537581 | AF017111     | chr7  | 83536352 | 83536986 |
|   | 7  | 83455112 | 83463615 | NM_177695    | chr7  | 83458674 | 83459364 |
|   | 15 | 83175441 | 83184013 | NM_025445    | chr15 | 83177615 | 83178302 |
|   | 2  | 83152297 | 83160796 | BC009100     | chr2  | 83153899 | 83154788 |
|   | 17 | 83117628 | 83126127 | NM_134117    | chr17 | 83123803 | 83124542 |
|   | 1  | 83032786 | 83041285 | NM_027725    | chr1  | 83039676 | 83040652 |
|   | 6  | 83033302 | 83041883 | NM_009392    | chr6  | 83034883 | 83035496 |
|   | 6  | 82993863 | 83002387 | NM_013586    | chr6  | 82997872 | 82998475 |
|   | 6  | 82996624 | 83005123 | NM_010070    | chr6  | 82997872 | 82998475 |
|   | 11 | 82985381 | 82995297 | NM_011410    | chr11 | 82986602 | 82987200 |
|   | 1  | 82914956 | 82923472 | NM_030556    | chr1  | 82920575 | 82921105 |
|   | 11 | 82834470 | 82843005 | NM_181545    | chr11 | 82839609 | 82840178 |
|   | 11 | 82834470 | 82843005 | NM_181545    | chr11 | 82838457 | 82839103 |
|   | 10 | 82784037 | 82792551 | NM_026579    | chr10 | 82789817 | 82790575 |
|   | 8  | 82605188 | 82613812 | NM_015751    | chr8  | 82607231 | 82608579 |
|   | 1  | 82460000 | 82468499 | NM_007734    | chr1  | 82466037 | 82467103 |
|   | 1  | 82463317 | 82471816 | NM_007735    | chr1  | 82466037 | 82467103 |
|   | 15 | 82446174 | 82454673 | NM_145474    | chr15 | 82447685 | 82448508 |
| X |    | 82438494 | 82447005 | NM_007430    | chrX  | 82440286 | 82440824 |
|   | 10 | 82282978 | 82298957 | NM_001042514 | chr10 | 82297069 | 82297964 |
|   | 15 | 82274158 | 82285833 | NM_010006    | chr15 | 82280390 | 82281143 |
|   | 15 | 82201286 | 82213926 | NM_019823    | chr15 | 82209320 | 82210077 |
|   | 3  | 82158113 | 82166616 | NM_017469    | chr3  | 82166116 | 82166564 |
|   | 3  | 82158113 | 82166616 | NM_017469    | chr3  | 82158291 | 82159065 |
|   | 3  | 82059143 | 82067655 | NM_019911    | chr3  | 82066292 | 82066979 |
|   | 15 | 81968515 | 81977023 | NM_033218    | chr15 | 81975144 | 81976252 |
|   | 12 | 81939676 | 81948178 | NM_022316    | chr12 | 81947479 | 81947859 |
|   | 9  | 81654420 | 81662961 | NM_175213    | chr9  | 81662065 | 81662472 |
|   | 10 | 80956689 | 80965231 | NM_010347    | chr10 | 80964079 | 80964647 |
|   | 10 | 80573788 | 80589546 | NM_007907    | chr10 | 80584466 | 80586042 |
|   | 10 | 80573788 | 80589546 | NM_007907    | chr10 | 80580460 | 80581278 |
|   | 8  | 80344498 | 80352997 | AF297029     | chr8  | 80345326 | 80346924 |
|   | 10 | 80252386 | 80260903 | NM_175195    | chr10 | 80257148 | 80257744 |
|   | 10 | 80244660 | 80253159 | NM_001013758 | chr10 | 80248819 | 80249413 |
|   | 7  | 80128733 | 80145956 | NM_178070    | chr7  | 80134931 | 80135528 |
|   | 15 | 80089048 | 80097561 | NM_175109    | chr15 | 80096393 | 80097079 |
|   | 2  | 79927279 | 79936314 | NM_016744    | chr2  | 79932859 | 79933838 |
| X |    | 79738144 | 79746643 | AB032764     | chrX  | 79739888 | 79740972 |
|   | 15 | 79658978 | 79667588 | NM_028763    | chr15 | 79661014 | 79661996 |
|   | 10 | 79564970 | 79585370 | NM_007909    | chr10 | 79570341 | 79571427 |
|   | 15 | 79429750 | 79438343 | NM_010059    | chr15 | 79431416 | 79433293 |

|    |          |          |              |       |          |          |
|----|----------|----------|--------------|-------|----------|----------|
| 7  | 79336282 | 79345786 | NM_017462    | chr7  | 79342693 | 79343461 |
| 15 | 79337723 | 79346229 | NM_134090    | chr15 | 79341025 | 79341628 |
| 15 | 79310576 | 79319075 | U11075       | chr15 | 79312192 | 79312785 |
| 10 | 79251734 | 79267645 | NM_001077363 | chr10 | 79256905 | 79257787 |
| 7  | 79255795 | 79264298 | NM_020599    | chr7  | 79256350 | 79257008 |
| 10 | 79038405 | 79054867 | NM_001033473 | chr10 | 79040983 | 79041583 |
| 10 | 79038405 | 79054867 | NM_001033473 | chr10 | 79039392 | 79040173 |
| 7  | 79001974 | 79010531 | NM_178255    | chr7  | 79002964 | 79003874 |
| 11 | 78798527 | 78807046 | NM_010708    | chr11 | 78804910 | 78806798 |
| 11 | 78730982 | 78740914 | NM_010927    | chr11 | 78734536 | 78735122 |
| 2  | 78663886 | 78672385 | NM_009454    | chr2  | 78670685 | 78671542 |
| 2  | 78663886 | 78672385 | NM_009454    | chr2  | 78666211 | 78666840 |
| 15 | 78627425 | 78636297 | NM_130859    | chr15 | 78629747 | 78630841 |
| 15 | 78499123 | 78507622 | BC079588     | chr15 | 78507008 | 78507616 |
| 10 | 78431927 | 78440426 | NM_147041    | chr10 | 78438186 | 78438987 |
| 10 | 78414453 | 78422952 | NM_147040    | chr10 | 78420829 | 78421653 |
| 15 | 78379604 | 78396067 | BC114397     | chr15 | 78381636 | 78382153 |
| 6  | 78349492 | 78358293 | NM_009042    | chr6  | 78353398 | 78354634 |
| 18 | 78338711 | 78347210 | AF367359     | chr18 | 78345669 | 78346570 |
| 5  | 78336716 | 78345215 | NM_011263    | chr5  | 78341301 | 78341955 |
| 6  | 78294394 | 78302910 | NM_011036    | chr6  | 78299911 | 78300926 |
| 10 | 78276303 | 78284802 | NM_207571    | chr10 | 78280624 | 78281504 |
| 5  | 78167298 | 78176030 | AF492704     | chr5  | 78172967 | 78173434 |
| 14 | 78154666 | 78163165 | NM_001024135 | chr14 | 78161180 | 78162716 |
| 15 | 78147113 | 78155774 | NM_007780    | chr15 | 78153834 | 78154437 |
| 5  | 78084798 | 78093297 | NM_027970    | chr5  | 78091083 | 78092026 |
| 1  | 78077455 | 78086283 | NM_008781    | chr1  | 78080687 | 78081417 |
| 1  | 78077455 | 78086283 | NM_008781    | chr1  | 78078697 | 78079659 |
| 2  | 78032386 | 78040885 | NM_177843    | chr2  | 78035031 | 78035759 |
| 12 | 77626888 | 77635387 | NM_013675    | chr12 | 77627292 | 77627934 |
| 5  | 77403387 | 77411888 | NM_023508    | chr5  | 77408584 | 77409358 |
| 12 | 77317016 | 77325742 | NM_008301    | chr12 | 77322913 | 77323516 |
| 10 | 77144360 | 77172719 | NM_010670    | chr10 | 77163192 | 77164808 |
| 10 | 77144360 | 77172719 | NM_010670    | chr10 | 77159319 | 77160057 |
| 10 | 77144360 | 77172719 | NM_010670    | chr10 | 77157529 | 77158402 |
| 10 | 77144360 | 77172719 | NM_010670    | chr10 | 77155733 | 77156820 |
| 10 | 77144360 | 77172719 | NM_010670    | chr10 | 77154503 | 77155494 |
| 10 | 77144360 | 77172719 | NM_010670    | chr10 | 77151862 | 77152314 |
| 10 | 77144360 | 77172719 | NM_010670    | chr10 | 77149404 | 77150654 |
| 15 | 76978406 | 76987005 | AF229055     | chr15 | 76984135 | 76984786 |
| 15 | 76978406 | 76987005 | AF229055     | chr15 | 76981132 | 76981748 |
| 15 | 76481821 | 76490410 | NM_010630    | chr15 | 76484126 | 76484711 |
| 6  | 76424743 | 76433293 | NM_153762    | chr6  | 76428982 | 76429617 |
| 8  | 75613370 | 75621875 | NM_009188    | chr8  | 75619382 | 75620219 |
| 9  | 75467425 | 75475926 | NM_009130    | chr9  | 75473766 | 75475515 |
| 15 | 75391570 | 75400114 | NM_011837    | chr15 | 75394844 | 75395600 |
| 13 | 75197707 | 75206206 | AF190152     | chr13 | 75197791 | 75198705 |

|   |    |          |                       |       |          |          |
|---|----|----------|-----------------------|-------|----------|----------|
|   | 9  | 75181817 | 75190549 BC048779     | chr9  | 75183432 | 75184069 |
|   | 1  | 75158992 | 75167528 NM_009049    | chr1  | 75165461 | 75166076 |
|   | 12 | 75075055 | 75083554 AB102950     | chr12 | 75077114 | 75077588 |
|   | 1  | 74782305 | 74790804 NM_009872    | chr1  | 74785871 | 74786459 |
|   | 8  | 74648350 | 74656849 NM_028715    | chr8  | 74648792 | 74649848 |
|   | 15 | 74624289 | 74633223 NM_029627    | chr15 | 74630961 | 74631446 |
|   | 8  | 74620391 | 74639957 NM_028189    | chr8  | 74625821 | 74626710 |
|   | 2  | 74557819 | 74566419 NM_010467    | chr2  | 74558909 | 74559331 |
|   | 8  | 74551368 | 74562598 BC058348     | chr8  | 74556176 | 74556858 |
|   | 2  | 74548846 | 74557345 NM_207266    | chr2  | 74552893 | 74553642 |
|   | 15 | 74530416 | 74550988 NM_198607    | chr15 | 74547259 | 74547946 |
|   | 8  | 74533987 | 74542621 NM_146211    | chr8  | 74540510 | 74541153 |
|   | 2  | 74516817 | 74530412 NM_010469    | chr2  | 74521686 | 74522459 |
|   | 2  | 74486787 | 74508827 NM_013555    | chr2  | 74506644 | 74508054 |
|   | 2  | 74486787 | 74508827 NM_013555    | chr2  | 74504842 | 74505536 |
|   | 13 | 74401169 | 74409769 NM_027182    | chr13 | 74408617 | 74409392 |
|   | 2  | 74390244 | 74398746 BC038626     | chr2  | 74392203 | 74392718 |
| X |    | 74341581 | 74350093 NM_008754    | chrX  | 74341785 | 74342857 |
|   | 1  | 74205757 | 74220761 NM_001039509 | chr1  | 74217943 | 74218536 |
|   | 1  | 74214677 | 74223873 NM_146110    | chr1  | 74217943 | 74218536 |
|   | 18 | 74187819 | 74196318 NM_172632    | chr18 | 74189305 | 74189906 |
| X |    | 74103720 | 74112219 NM_017471    | chrX  | 74111826 | 74112555 |
|   | 11 | 74098843 | 74107342 NM_011002    | chr11 | 74101035 | 74101701 |
|   | 11 | 74020985 | 74029484 NM_146711    | chr11 | 74022270 | 74023720 |
|   | 11 | 74005700 | 74014199 NM_207622    | chr11 | 74013304 | 74013983 |
|   | 11 | 74005700 | 74014199 NM_207622    | chr11 | 74012236 | 74013012 |
|   | 11 | 74005700 | 74014199 NM_207622    | chr11 | 74011010 | 74011963 |
|   | 11 | 73965310 | 73973809 NM_146708    | chr11 | 73971697 | 73972707 |
|   | 11 | 73965310 | 73973809 NM_146708    | chr11 | 73969101 | 73969982 |
|   | 14 | 73926223 | 73934722 D37837       | chr14 | 73931912 | 73932368 |
|   | 11 | 73868474 | 73876973 NM_147004    | chr11 | 73870520 | 73871341 |
|   | 11 | 73868474 | 73876973 NM_147004    | chr11 | 73869540 | 73870472 |
|   | 11 | 73858968 | 73867467 NM_147003    | chr11 | 73860666 | 73863253 |
|   | 11 | 73798302 | 73806801 NM_146710    | chr11 | 73802829 | 73803883 |
|   | 17 | 73703746 | 73712478 NM_020578    | chr17 | 73708049 | 73708869 |
|   | 11 | 73628776 | 73637275 NM_147006    | chr11 | 73630510 | 73631095 |
|   | 17 | 73612618 | 73621117 NM_027864    | chr17 | 73617034 | 73617473 |
|   | 17 | 73612618 | 73621117 NM_027864    | chr17 | 73612589 | 73613621 |
|   | 11 | 73591021 | 73599520 NM_147009    | chr11 | 73592627 | 73593261 |
|   | 8  | 73586157 | 73594670 NM_023217    | chr8  | 73588858 | 73589468 |
|   | 4  | 73419522 | 73428077 NM_027104    | chr4  | 73423034 | 73423985 |
|   | 11 | 73412777 | 73421276 NM_207224    | chr11 | 73419224 | 73419927 |
|   | 11 | 73403432 | 73411931 NM_147023    | chr11 | 73408751 | 73409368 |
|   | 11 | 73403432 | 73411931 NM_147023    | chr11 | 73406323 | 73407097 |
|   | 11 | 73403432 | 73411931 NM_147023    | chr11 | 73405069 | 73405698 |
|   | 11 | 73330893 | 73339392 NM_146443    | chr11 | 73337130 | 73337877 |
|   | 15 | 73247867 | 73262166 BC030180     | chr15 | 73260697 | 73261380 |

|   |    |          |          |              |       |          |          |
|---|----|----------|----------|--------------|-------|----------|----------|
|   | 5  | 73145067 | 73153618 | NM_013689    | chr5  | 73145861 | 73146458 |
|   | 2  | 73066764 | 73075263 | NM_001005343 | chr2  | 73072816 | 73073719 |
|   | 2  | 73066764 | 73075263 | NM_001005343 | chr2  | 73071695 | 73072514 |
|   | 5  | 72914478 | 72927887 | NM_007723    | chr5  | 72925277 | 72925943 |
|   | 5  | 72920931 | 72929493 | BC125449     | chr5  | 72925277 | 72925943 |
|   | 5  | 72857714 | 72872685 | NM_001024147 | chr5  | 72861033 | 72861791 |
|   | 5  | 72793932 | 72809364 | BC022652     | chr5  | 72805976 | 72806586 |
|   | 8  | 72731676 | 72740200 | NM_198101    | chr8  | 72736217 | 72737016 |
|   | 1  | 72631272 | 72639771 | NM_176980    | chr1  | 72631504 | 72632175 |
|   | 6  | 72467948 | 72487279 | NM_001042534 | chr6  | 72482436 | 72483317 |
|   | 13 | 72426980 | 72435479 | NM_010573    | chr13 | 72433065 | 72433720 |
|   | 6  | 72270843 | 72288161 | NM_144916    | chr6  | 72282295 | 72282936 |
|   | 2  | 72271047 | 72279557 | NM_025866    | chr2  | 72271042 | 72271409 |
|   | 1  | 72211581 | 72220080 | NM_175564    | chr1  | 72220009 | 72220616 |
|   | 1  | 72214947 | 72223512 | NM_023523    | chr1  | 72220009 | 72220616 |
|   | 7  | 72177609 | 72186108 | NM_001024703 | chr7  | 72178947 | 72179825 |
|   | 12 | 72052740 | 72061280 | NM_013896    | chr12 | 72055319 | 72056139 |
|   | 11 | 72017749 | 72033866 | NM_026559    | chr11 | 72028063 | 72028689 |
|   | 5  | 71934572 | 71943443 | NM_010251    | chr5  | 71935443 | 71936083 |
|   | 8  | 71716943 | 71725455 | NM_027590    | chr8  | 71717550 | 71718199 |
|   | 6  | 71559579 | 71568414 | NM_173001    | chr6  | 71563419 | 71564137 |
|   | 6  | 71467363 | 71475941 | NM_025783    | chr6  | 71473135 | 71473942 |
|   | 10 | 71373491 | 71381994 | NM_175390    | chr10 | 71374012 | 71374865 |
|   | 6  | 71367498 | 71375997 | NM_024288    | chr6  | 71369766 | 71370540 |
|   | 2  | 71248177 | 71256676 | NM_025633    | chr2  | 71252977 | 71253831 |
|   | 17 | 71213274 | 71222323 | NM_145158    | chr17 | 71214957 | 71215591 |
|   | 6  | 71189333 | 71197838 | NM_009762    | chr6  | 71195069 | 71195621 |
|   | 12 | 71143723 | 71152230 | NM_133198    | chr12 | 71145328 | 71146311 |
|   | 9  | 70959321 | 70967849 | NM_022026    | chr9  | 70963883 | 70964553 |
| X |    | 70841048 | 70849547 | NM_146398    | chrX  | 70847031 | 70847691 |
|   | 12 | 70805874 | 70814373 | NM_178628    | chr12 | 70810801 | 70811410 |
|   | 12 | 70809118 | 70817768 | NM_201519    | chr12 | 70810801 | 70811410 |
|   | 12 | 70805874 | 70814373 | NM_178628    | chr12 | 70807109 | 70808022 |
|   | 12 | 70637567 | 70646066 | NM_026536    | chr12 | 70639739 | 70640349 |
| X |    | 70529470 | 70568289 | NM_177234    | chrX  | 70533978 | 70534615 |
| X |    | 70531851 | 70541053 | NM_027109    | chrX  | 70533978 | 70534615 |
|   | 11 | 70460689 | 70476830 | NM_024211    | chr11 | 70474838 | 70475556 |
|   | 11 | 70467399 | 70476490 | NM_007933    | chr11 | 70474838 | 70475556 |
|   | 8  | 70413747 | 70432512 | NM_010874    | chr8  | 70418011 | 70418533 |
|   | 11 | 70373076 | 70381711 | NM_001045964 | chr11 | 70380107 | 70380724 |
|   | 12 | 70284755 | 70293311 | NM_007481    | chr12 | 70290496 | 70291086 |
|   | 2  | 70269762 | 70278504 | NM_022435    | chr2  | 70276771 | 70277527 |
| X |    | 70274134 | 70282656 | NM_008363    | chrX  | 70276339 | 70276965 |
|   | 11 | 70165713 | 70174212 | NM_009660    | chr11 | 70173077 | 70173893 |
|   | 11 | 70069037 | 70077536 | NM_007440    | chr11 | 70072856 | 70073343 |
|   | 11 | 70034467 | 70062041 | NM_007528    | chr11 | 70055960 | 70056709 |
|   | 4  | 70018699 | 70027289 | NM_172694    | chr4  | 70020635 | 70021687 |

|   |    |          |          |              |       |          |          |
|---|----|----------|----------|--------------|-------|----------|----------|
| X |    | 69963317 | 69971987 | NM_007435    | chrX  | 69971138 | 69972069 |
| X |    | 69965150 | 69974895 | NM_012060    | chrX  | 69971138 | 69972069 |
|   | 11 | 69794138 | 69802705 | NM_018740    | chr11 | 69795230 | 69795851 |
|   | 11 | 69775696 | 69784552 | NM_016887    | chr11 | 69782386 | 69782976 |
| X |    | 69749806 | 69758305 | NM_177236    | chrX  | 69753994 | 69754610 |
|   | 10 | 69634633 | 69643177 | NM_025807    | chr10 | 69641036 | 69641900 |
|   | 11 | 69632136 | 69657044 | NM_198862    | chr11 | 69633656 | 69634505 |
|   | 8  | 69620411 | 69635336 | NM_010934    | chr8  | 69632724 | 69633574 |
|   | 8  | 69620411 | 69635336 | NM_010934    | chr8  | 69625702 | 69626508 |
|   | 11 | 69609639 | 69627819 | NM_009601    | chr11 | 69620769 | 69621447 |
| X |    | 69540736 | 69549235 | NM_031493    | chrX  | 69548531 | 69548989 |
| X |    | 69513675 | 69524110 | NM_011727    | chrX  | 69518107 | 69518892 |
| X |    | 69438936 | 69447441 | BC064787     | chrX  | 69444104 | 69444848 |
|   | 11 | 69390176 | 69405584 | NM_011640    | chr11 | 69394517 | 69395664 |
| X |    | 69363767 | 69378335 | NM_001025383 | chrX  | 69369397 | 69370215 |
| X |    | 69367923 | 69376422 | NM_001045539 | chrX  | 69369397 | 69370215 |
|   | 14 | 69362735 | 69371234 | NM_013514    | chr14 | 69368337 | 69369158 |
| X |    | 69345296 | 69355761 | NM_011726    | chrX  | 69349854 | 69350617 |
|   | 10 | 69287488 | 69295987 | U89275       | chr10 | 69295415 | 69295969 |
|   | 14 | 69252769 | 69265156 | NM_009755    | chr14 | 69254432 | 69254998 |
| X |    | 69243754 | 69253000 | NM_009549    | chrX  | 69251618 | 69252771 |
| X |    | 69116087 | 69124586 | NM_181855    | chrX  | 69122416 | 69123088 |
|   | 9  | 69083056 | 69091555 | BC003757     | chr9  | 69090436 | 69091178 |
|   | 13 | 69043617 | 69052146 | NM_027123    | chr13 | 69049042 | 69050113 |
|   | 13 | 69045588 | 69055492 | NM_172480    | chr13 | 69049042 | 69050113 |
|   | 8  | 68541514 | 68550013 | NM_175188    | chr8  | 68548802 | 68549753 |
|   | 8  | 68541514 | 68550013 | NM_175188    | chr8  | 68545404 | 68546308 |
|   | 4  | 68438211 | 68446758 | NM_019967    | chr4  | 68441009 | 68442177 |
|   | 4  | 68438211 | 68446758 | NM_019967    | chr4  | 68439161 | 68439744 |
|   | 12 | 68423326 | 68431837 | BC090990     | chr12 | 68428049 | 68428740 |
|   | 13 | 68356440 | 68364939 | BC048507     | chr13 | 68361437 | 68362563 |
|   | 13 | 68325833 | 68334332 | NM_001015506 | chr13 | 68326923 | 68328073 |
|   | 11 | 68199832 | 68209021 | NM_008744    | chr11 | 68206314 | 68206920 |
|   | 11 | 68199832 | 68209021 | NM_008744    | chr11 | 68203230 | 68203881 |
|   | 6  | 68165962 | 68188659 | AF043688     | chr6  | 68186711 | 68187318 |
|   | 6  | 68165962 | 68188659 | AF043688     | chr6  | 68183424 | 68184192 |
|   | 17 | 68172772 | 68181271 | NM_177278    | chr17 | 68173246 | 68173971 |
|   | 14 | 68138022 | 68146521 | NM_010921    | chr14 | 68138403 | 68139016 |
|   | 14 | 68119132 | 68127631 | NM_010920    | chr14 | 68126599 | 68127266 |
|   | 18 | 67960896 | 67969395 | BC064462     | chr18 | 67965815 | 67966764 |
| X |    | 67918323 | 67926822 | NM_010340    | chrX  | 67923553 | 67925009 |
| X |    | 67918323 | 67926822 | NM_010340    | chrX  | 67918619 | 67919226 |
|   | 2  | 67912567 | 67921066 | NM_020283    | chr2  | 67918293 | 67919343 |
|   | 5  | 67881018 | 67890009 | NM_001033415 | chr5  | 67887253 | 67887878 |
| X |    | 67810510 | 67821105 | NM_008253    | chrX  | 67815178 | 67816103 |
|   | 18 | 67760968 | 67769488 | NM_134138    | chr18 | 67766755 | 67767360 |
|   | 18 | 67764087 | 67772586 | BC119216     | chr18 | 67766755 | 67767360 |

|   |    |          |                       |       |          |          |
|---|----|----------|-----------------------|-------|----------|----------|
|   | 16 | 67536647 | 67545146 NM_178721    | chr16 | 67536667 | 67537809 |
|   | 6  | 67462865 | 67471400 NM_020047    | chr6  | 67467336 | 67467964 |
|   | 10 | 67430758 | 67439257 AY036116     | chr10 | 67431161 | 67432003 |
|   | 13 | 67362579 | 67371671 NM_008959    | chr13 | 67368154 | 67369072 |
|   | 13 | 67366280 | 67374816 NM_025547    | chr13 | 67368154 | 67369072 |
|   | 11 | 67343193 | 67351772 NM_008088    | chr11 | 67345654 | 67346250 |
|   | 13 | 67303803 | 67312323 BC089319     | chr13 | 67305932 | 67307790 |
|   | 13 | 67303803 | 67312323 BC089319     | chr13 | 67303945 | 67304787 |
|   | 17 | 67256519 | 67265402 NM_008984    | chr17 | 67258690 | 67259299 |
|   | 6  | 67129088 | 67137587 BC086886     | chr6  | 67135634 | 67136410 |
|   | 14 | 67075835 | 67084334 NM_008691    | chr14 | 67077194 | 67078348 |
| X |    | 66640469 | 66649023 NM_026787    | chrX  | 66645865 | 66646752 |
| X |    | 66623041 | 66631640 NM_010498    | chrX  | 66625606 | 66626540 |
|   | 15 | 66388148 | 66396715 NM_172514    | chr15 | 66394855 | 66395507 |
|   | 14 | 66181402 | 66191721 NM_010095    | chr14 | 66184486 | 66185583 |
|   | 14 | 66181402 | 66191721 NM_010095    | chr14 | 66182106 | 66184034 |
|   | 5  | 66136036 | 66144535 BC094937     | chr5  | 66137236 | 66137868 |
|   | 17 | 66017063 | 66025562 NM_001003919 | chr17 | 66017247 | 66017849 |
|   | 17 | 65974068 | 65982589 NM_001025572 | chr17 | 65978411 | 65979171 |
|   | 1  | 65854798 | 65863318 NM_027010    | chr1  | 65861811 | 65862643 |
|   | 8  | 65837638 | 65846165 NM_023689    | chr8  | 65844774 | 65845624 |
|   | 18 | 65744672 | 65753171 BC046409     | chr18 | 65748035 | 65749034 |
|   | 17 | 65669725 | 65678224 NM_133685    | chr17 | 65672215 | 65672956 |
| X |    | 65614996 | 65623495 NM_008032    | chrX  | 65619585 | 65620174 |
|   | 17 | 65510585 | 65519084 NM_013933    | chr17 | 65511126 | 65511849 |
|   | 9  | 65375541 | 65384046 NM_153119    | chr9  | 65376569 | 65377176 |
|   | 6  | 65304963 | 65313470 NM_175524    | chr6  | 65306825 | 65307449 |
|   | 2  | 65296939 | 65305438 L42337       | chr2  | 65304331 | 65305055 |
|   | 1  | 65107146 | 65119390 NM_010497    | chr1  | 65113452 | 65114565 |
|   | 13 | 65085921 | 65094420 BC018395     | chr13 | 65091716 | 65092314 |
|   | 9  | 65086301 | 65094814 NM_011802    | chr9  | 65086794 | 65087430 |
| X |    | 65016504 | 65025003 NM_174993    | chrX  | 65024058 | 65024742 |
| X |    | 64933220 | 64941864 NM_008031    | chrX  | 64940090 | 64940972 |
|   | 9  | 64933160 | 64941717 NM_008988    | chr9  | 64938898 | 64939558 |
|   | 9  | 64892952 | 64901991 NM_020043    | chr9  | 64895243 | 64895750 |
|   | 16 | 64726024 | 64734523 NM_028059    | chr16 | 64727514 | 64728266 |
|   | 18 | 64611918 | 64620435 NM_007998    | chr18 | 64616333 | 64616919 |
|   | 14 | 64614537 | 64623119 NM_028903    | chr14 | 64615998 | 64616770 |
|   | 18 | 64572559 | 64581058 NM_007444    | chr18 | 64573505 | 64575047 |
|   | 18 | 64384757 | 64393256 NM_009182    | chr18 | 64389128 | 64389718 |
|   | 7  | 64265721 | 64274220 NM_028626    | chr7  | 64271441 | 64272043 |
|   | 7  | 64268663 | 64277186 NM_026483    | chr7  | 64271441 | 64272043 |
|   | 5  | 64085499 | 64093998 NM_029554    | chr5  | 64086928 | 64087540 |
|   | 5  | 64085499 | 64093998 NM_029554    | chr5  | 64085518 | 64086324 |
|   | 15 | 63887622 | 63896121 NM_144846    | chr15 | 63890313 | 63890943 |
|   | 8  | 63844375 | 63852912 NM_173876    | chr8  | 63846825 | 63847604 |
|   | 15 | 63825136 | 63833635 BC011343     | chr15 | 63827702 | 63828440 |



|   |    |          |                       |       |          |          |
|---|----|----------|-----------------------|-------|----------|----------|
|   | 9  | 63816828 | 63826065 NM_008542    | chr9  | 63817238 | 63817906 |
|   | 1  | 63658927 | 63668174 NM_172422    | chr1  | 63660232 | 63660830 |
|   | 18 | 63153288 | 63161787 NM_001039485 | chr18 | 63156463 | 63157109 |
|   | 18 | 63097285 | 63105784 NM_028017    | chr18 | 63101485 | 63102124 |
|   | 2  | 62982627 | 62991126 NM_133207    | chr2  | 62984056 | 62984652 |
| X |    | 62907824 | 62916323 NM_198863    | chrX  | 62911607 | 62912355 |
|   | 4  | 62882102 | 62895723 NM_001045514 | chr4  | 62890761 | 62891566 |
|   | 16 | 62726473 | 62735014 NM_178925    | chr16 | 62728790 | 62729669 |
|   | 11 | 62597462 | 62611612 NM_138949    | chr11 | 62598213 | 62598958 |
|   | 18 | 62302829 | 62311328 NM_007420    | chr18 | 62303803 | 62304620 |
|   | 7  | 62296590 | 62305089 NM_011746    | chr7  | 62301997 | 62302652 |
|   | 7  | 62296590 | 62305089 NM_011746    | chr7  | 62298987 | 62300240 |
|   | 11 | 62268481 | 62276980 NM_001039536 | chr11 | 62273881 | 62274499 |
|   | 11 | 62271028 | 62280001 NM_011308    | chr11 | 62273881 | 62274499 |
|   | 7  | 62249944 | 62261136 BC054763     | chr7  | 62255341 | 62255925 |
|   | 5  | 62091080 | 62099579 NM_019468    | chr5  | 62097080 | 62098755 |
|   | 11 | 62059179 | 62067763 NM_007413    | chr11 | 62062933 | 62063679 |
|   | 18 | 61849190 | 61857700 NM_021296    | chr18 | 61851198 | 61851814 |
|   | 9  | 61822266 | 61830796 NM_028748    | chr9  | 61824215 | 61824809 |
|   | 13 | 61577189 | 61585747 NM_026906    | chr13 | 61581796 | 61582794 |
|   | 13 | 61577189 | 61585747 NM_026906    | chr13 | 61578371 | 61579251 |
|   | 13 | 61548920 | 61557432 NM_022326    | chr13 | 61553652 | 61554237 |
|   | 13 | 61548920 | 61557432 NM_022326    | chr13 | 61548938 | 61549843 |
|   | 2  | 61387966 | 61396497 BC026148     | chr2  | 61394467 | 61395062 |
|   | 14 | 61280214 | 61288714 NM_026001    | chr14 | 61286393 | 61287236 |
|   | 13 | 61170368 | 61179879 NM_020284    | chr13 | 61173739 | 61174798 |
|   | 9  | 61164864 | 61174177 NM_009389    | chr9  | 61171817 | 61172420 |
|   | 4  | 61157932 | 61166497 BC012259     | chr4  | 61159272 | 61160847 |
|   | 13 | 61047721 | 61056248 NM_029636    | chr13 | 61051822 | 61052475 |
|   | 13 | 61011688 | 61021548 NM_012007    | chr13 | 61015432 | 61016204 |
|   | 13 | 61011688 | 61021548 NM_012007    | chr13 | 61012251 | 61013254 |
|   | 4  | 61003341 | 61011840 BC037152     | chr4  | 61004671 | 61006219 |
|   | 19 | 60939003 | 60947638 NM_018869    | chr19 | 60943858 | 60944865 |
|   | 1  | 60916460 | 60924975 NM_017480    | chr1  | 60923392 | 60923744 |
|   | 13 | 60871527 | 60880039 NM_178098    | chr13 | 60876523 | 60877089 |
|   | 10 | 60865190 | 60873689 NM_153542    | chr10 | 60868788 | 60869537 |
|   | 4  | 60634199 | 60642721 BC099597     | chr4  | 60635545 | 60637136 |
|   | 3  | 60611078 | 60619577 AF231110     | chr3  | 60616018 | 60616800 |
|   | 11 | 60538593 | 60547203 NM_001009927 | chr11 | 60546768 | 60547426 |
|   | 11 | 60540898 | 60549416 NM_022009    | chr11 | 60546768 | 60547426 |
|   | 11 | 60538593 | 60547203 NM_001009927 | chr11 | 60542926 | 60543512 |
|   | 11 | 60540898 | 60549416 NM_022009    | chr11 | 60542926 | 60543512 |
|   | 4  | 60231412 | 60239951 NM_008647    | chr4  | 60232520 | 60234311 |
|   | 2  | 60181598 | 60190103 NM_013825    | chr2  | 60184354 | 60184943 |
|   | 4  | 60161900 | 60170419 BC100586     | chr4  | 60163156 | 60164796 |
|   | 14 | 59989502 | 60006600 NM_013869    | chr14 | 59999406 | 60000004 |
|   | 4  | 59893704 | 59902407 NM_172468    | chr4  | 59900141 | 59900746 |

|    |          |          |              |       |          |          |
|----|----------|----------|--------------|-------|----------|----------|
| 13 | 59713305 | 59721804 | NM_028157    | chr13 | 59716903 | 59717545 |
| 10 | 59581565 | 59595596 | NM_016803    | chr10 | 59582065 | 59582692 |
| 9  | 59428715 | 59437214 | BC030184     | chr9  | 59432144 | 59432862 |
| 11 | 59189349 | 59197848 | NM_001045521 | chr11 | 59190306 | 59190985 |
| 18 | 59181878 | 59190401 | NM_173759    | chr18 | 59186723 | 59187435 |
| 16 | 59156368 | 59164867 | NM_207550    | chr16 | 59158838 | 59159453 |
| 16 | 59156368 | 59164867 | NM_207550    | chr16 | 59157353 | 59158007 |
| 16 | 59126238 | 59134737 | NM_146484    | chr16 | 59127822 | 59128409 |
| 2  | 58955859 | 58964360 | NM_026361    | chr2  | 58961689 | 58962910 |
| 2  | 58958967 | 58967466 | BC062650     | chr2  | 58961689 | 58962910 |
| 19 | 58845165 | 58853664 | NM_026208    | chr19 | 58849208 | 58849849 |
| 6  | 58834144 | 58842654 | NM_021432    | chr6  | 58836708 | 58838125 |
| 16 | 58812905 | 58821404 | NM_146993    | chr16 | 58814031 | 58814792 |
| 11 | 58773976 | 58782475 | NM_031172    | chr11 | 58777634 | 58778366 |
| 19 | 58717615 | 58726114 | NM_026925    | chr19 | 58723773 | 58724542 |
| 10 | 58712725 | 58721229 | NM_011030    | chr10 | 58718561 | 58719127 |
| 11 | 58669630 | 58685934 | NM_172403    | chr11 | 58678690 | 58679392 |
| 18 | 58675609 | 58684125 | BC115435     | chr18 | 58678341 | 58679298 |
| 1  | 58650054 | 58660362 | NM_207653    | chr1  | 58657470 | 58658060 |
| 3  | 58607945 | 58616460 | NM_001005509 | chr3  | 58613284 | 58613923 |
| 3  | 58611160 | 58619683 | NM_030685    | chr3  | 58613284 | 58613923 |
| 6  | 58520249 | 58528749 | NM_011920    | chr6  | 58523719 | 58527111 |
| 11 | 58450660 | 58459159 | NM_001039047 | chr11 | 58457577 | 58458228 |
| 1  | 58446966 | 58455473 | NM_008765    | chr1  | 58451696 | 58452808 |
| 1  | 58446966 | 58455473 | NM_008765    | chr1  | 58449702 | 58450821 |
| 13 | 58405891 | 58414830 | NM_028904    | chr13 | 58412039 | 58412648 |
| 13 | 58409230 | 58418966 | NM_025279    | chr13 | 58412039 | 58412648 |
| 14 | 58389091 | 58397606 | NM_026908    | chr14 | 58393959 | 58394573 |
| 4  | 58374014 | 58382621 | NM_001037127 | chr4  | 58374456 | 58375071 |
| 11 | 58357152 | 58365669 | NM_001011531 | chr11 | 58363337 | 58363969 |
| 1  | 58331673 | 58340196 | NM_025824    | chr1  | 58338434 | 58339355 |
| 15 | 57926360 | 57934859 | BC032211     | chr15 | 57929988 | 57930505 |
| 13 | 57915399 | 57923898 | NM_009262    | chr13 | 57915464 | 57917381 |
| 10 | 57836209 | 57844708 | NM_011240    | chr10 | 57841676 | 57842859 |
| 1  | 57713471 | 57721973 | NM_144882    | chr1  | 57720026 | 57720849 |
| 19 | 57700223 | 57708722 | BC050020     | chr19 | 57700283 | 57701820 |
| 10 | 57616384 | 57638017 | NM_001034869 | chr10 | 57629016 | 57631082 |
| 10 | 57616384 | 57638017 | NM_001034869 | chr10 | 57625214 | 57627484 |
| 10 | 57616384 | 57638017 | NM_001034869 | chr10 | 57624421 | 57624843 |
| 10 | 57616384 | 57638017 | NM_001034869 | chr10 | 57621265 | 57624148 |
| 10 | 57616384 | 57638017 | NM_001034869 | chr10 | 57616800 | 57620007 |
| 3  | 57507388 | 57515887 | NM_145539    | chr3  | 57508013 | 57508617 |
| 10 | 57476959 | 57485458 | NM_020561    | chr10 | 57477380 | 57477990 |
| 12 | 57450619 | 57460920 | NM_009385    | chr12 | 57455677 | 57456586 |
| X  | 57151371 | 57159870 | NM_009237    | chrX  | 57159117 | 57159730 |
| X  | 57151371 | 57159870 | NM_009237    | chrX  | 57154369 | 57155490 |
| 6  | 56994520 | 57003019 | NM_134185    | chr6  | 56996450 | 56997263 |

|   |    |          |                       |       |          |          |
|---|----|----------|-----------------------|-------|----------|----------|
|   | 9  | 56952777 | 56962394 NM_025417    | chr9  | 56959898 | 56960678 |
|   | 14 | 56950866 | 56959372 NM_028643    | chr14 | 56957726 | 56958716 |
|   | 2  | 56928142 | 56936641 NM_013613    | chr2  | 56928270 | 56929396 |
|   | 14 | 56841873 | 56850389 NM_029492    | chr14 | 56849514 | 56849940 |
|   | 14 | 56523180 | 56531679 NM_026526    | chr14 | 56528377 | 56529189 |
|   | 12 | 56511603 | 56520102 NM_020287    | chr12 | 56516661 | 56517270 |
|   | 12 | 56511603 | 56520102 NM_020287    | chr12 | 56515247 | 56515982 |
|   | 8  | 56447541 | 56456414 NM_153581    | chr8  | 56452333 | 56453262 |
|   | 12 | 56408211 | 56416725 NM_010907    | chr12 | 56410407 | 56411070 |
|   | 16 | 56396851 | 56405350 NM_001014423 | chr16 | 56398735 | 56399327 |
|   | 17 | 56143625 | 56152191 NM_011483    | chr17 | 56150046 | 56151018 |
|   | 17 | 56143625 | 56152191 NM_011483    | chr17 | 56145831 | 56146892 |
|   | 14 | 56076832 | 56093687 NM_001010937 | chr14 | 56091682 | 56092386 |
|   | 8  | 56026161 | 56034680 BC054817     | chr8  | 56031565 | 56032433 |
|   | 7  | 55912272 | 55920907 NM_010418    | chr7  | 55915724 | 55916328 |
|   | 16 | 55857300 | 55871662 NM_028815    | chr16 | 55867365 | 55868008 |
|   | 16 | 55761106 | 55769805 NM_030612    | chr16 | 55763668 | 55764561 |
|   | 17 | 55700597 | 55721239 NM_020568    | chr17 | 55715003 | 55715875 |
|   | 7  | 55630203 | 55638779 NM_178706    | chr7  | 55635176 | 55635605 |
|   | 13 | 55556536 | 55565082 BC021381     | chr13 | 55559810 | 55560807 |
| X |    | 55478721 | 55487220 NM_010200    | chrX  | 55482809 | 55483572 |
| X |    | 55478721 | 55487220 NM_010200    | chrX  | 55481203 | 55481821 |
|   | 15 | 55381491 | 55389990 NM_134092    | chr15 | 55388058 | 55388675 |
|   | 15 | 55384880 | 55393401 NM_026759    | chr15 | 55388058 | 55388675 |
|   | 13 | 55329009 | 55345367 NM_016662    | chr13 | 55339902 | 55340689 |
|   | 9  | 55307731 | 55316380 NM_145615    | chr9  | 55311937 | 55312801 |
|   | 3  | 55219268 | 55227767 NM_177203    | chr3  | 55223233 | 55223833 |
|   | 13 | 55156262 | 55167563 NM_008011    | chr13 | 55160884 | 55161477 |
|   | 6  | 55044992 | 55053563 AY445512     | chr6  | 55050922 | 55051597 |
|   | 11 | 55041793 | 55050292 NM_153139    | chr11 | 55045070 | 55045712 |
|   | 14 | 54982067 | 54990566 NM_010782    | chr14 | 54987803 | 54988457 |
|   | 9  | 54844167 | 54852727 NM_148944    | chr9  | 54846516 | 54847177 |
|   | 13 | 54773563 | 54782062 NM_033610    | chr13 | 54778857 | 54779453 |
|   | 9  | 54709420 | 54717958 NM_177351    | chr9  | 54714808 | 54715454 |
|   | 14 | 54709499 | 54722601 NM_008519    | chr14 | 54713941 | 54714538 |
|   | 14 | 54709949 | 54718529 NM_009894    | chr14 | 54713941 | 54714538 |
|   | 9  | 54709420 | 54717958 NM_177351    | chr9  | 54712095 | 54712697 |
|   | 14 | 54523745 | 54535064 NM_011189    | chr14 | 54530140 | 54531164 |
|   | 6  | 54493437 | 54501960 NM_027268    | chr6  | 54494214 | 54494977 |
|   | 9  | 54491521 | 54500195 NM_021422    | chr9  | 54493755 | 54495025 |
|   | 9  | 54457319 | 54466022 NM_053178    | chr9  | 54457329 | 54457962 |
| X |    | 54371412 | 54379926 NM_009575    | chrX  | 54376233 | 54377109 |
|   | 7  | 54278036 | 54286538 BC096397     | chr7  | 54284960 | 54285570 |
|   | 3  | 54276581 | 54285080 AF011543     | chr3  | 54278840 | 54279765 |
|   | 11 | 54141221 | 54150176 NM_001033597 | chr11 | 54143271 | 54144024 |
|   | 11 | 53909870 | 53918391 NM_019417    | chr11 | 53917560 | 53918201 |
|   | 14 | 53842359 | 53850858 NM_019402    | chr14 | 53847300 | 53848050 |

|   |    |          |          |              |       |          |          |
|---|----|----------|----------|--------------|-------|----------|----------|
|   | 3  | 53742785 | 53751284 | NM_172862    | chr3  | 53741508 | 53743549 |
|   | 4  | 53729098 | 53743604 | NM_139309    | chr4  | 53738840 | 53739657 |
|   | 11 | 53607501 | 53616417 | NM_008390    | chr11 | 53615872 | 53616504 |
|   | 11 | 53475626 | 53484125 | NM_008355    | chr11 | 53480767 | 53481521 |
|   | 11 | 53475626 | 53484125 | NM_008355    | chr11 | 53479776 | 53480395 |
| X |    | 53428890 | 53437389 | NM_133251    | chrX  | 53430086 | 53430703 |
| X |    | 53394399 | 53402898 | NM_028242    | chrX  | 53399841 | 53400445 |
|   | 13 | 53382396 | 53390899 | NM_009269    | chr13 | 53389363 | 53390345 |
|   | 1  | 53252206 | 53260707 | NM_028091    | chr1  | 53257893 | 53258494 |
| X |    | 53120472 | 53137271 | NM_001077362 | chrX  | 53125648 | 53126448 |
| X |    | 53120472 | 53137271 | NM_001077362 | chrX  | 53120702 | 53121386 |
| X |    | 53072571 | 53081240 | NM_001077361 | chrX  | 53075591 | 53076192 |
|   | 13 | 52974665 | 52987346 | BC100384     | chr13 | 52979750 | 52980541 |
|   | 17 | 52925751 | 52934250 | NM_172497    | chr17 | 52928320 | 52929302 |
|   | 18 | 52887078 | 52895962 | NM_026408    | chr18 | 52894399 | 52895157 |
|   | 14 | 52695171 | 52703680 | M16119       | chr14 | 52701127 | 52701906 |
|   | 5  | 52646052 | 52658688 | NM_011435    | chr5  | 52653124 | 52653677 |
|   | 18 | 52652461 | 52661072 | NM_010728    | chr18 | 52652899 | 52653923 |
|   | 14 | 52618007 | 52626506 | NM_177288    | chr14 | 52620857 | 52621688 |
|   | 2  | 52561659 | 52570209 | NM_019667    | chr2  | 52567194 | 52567606 |
|   | 15 | 52305817 | 52314316 | BC100335     | chr15 | 52308531 | 52309111 |
|   | 6  | 52274057 | 52282882 | NM_001048058 | chr6  | 52281780 | 52282537 |
|   | 6  | 52237076 | 52245819 | NM_007966    | chr6  | 52242640 | 52243410 |
|   | 6  | 52128026 | 52170522 | NM_008263    | chr6  | 52166065 | 52166989 |
|   | 17 | 52061692 | 52070191 | NM_001031811 | chr17 | 52065506 | 52066572 |
|   | 1  | 51946788 | 51958825 | NM_011487    | chr1  | 51948889 | 51949594 |
|   | 9  | 51820244 | 51828743 | NM_001001500 | chr9  | 51822811 | 51823321 |
|   | 2  | 51792513 | 51801105 | NM_019401    | chr2  | 51798260 | 51798873 |
|   | 13 | 51577081 | 51585580 | NM_009167    | chr13 | 51582779 | 51583442 |
|   | 13 | 51577081 | 51585580 | NM_009167    | chr13 | 51579106 | 51579908 |
|   | 11 | 51476674 | 51485319 | NM_025346    | chr11 | 51479045 | 51479832 |
|   | 14 | 51330379 | 51338878 | NM_146431    | chr14 | 51333280 | 51333865 |
|   | 13 | 51177519 | 51186055 | NM_029173    | chr13 | 51181495 | 51182476 |
|   | 11 | 50794556 | 50803055 | NM_008936    | chr11 | 50796693 | 50797399 |
|   | 11 | 50771877 | 50780408 | NM_013744    | chr11 | 50779759 | 50780209 |
|   | 11 | 50728367 | 50736924 | NM_172794    | chr11 | 50733320 | 50734084 |
|   | 10 | 50578066 | 50586772 | NM_011376    | chr10 | 50584209 | 50585303 |
|   | 9  | 50514468 | 50530059 | NM_133981    | chr9  | 50519681 | 50520630 |
|   | 9  | 50517857 | 50526382 | NM_023483    | chr9  | 50519681 | 50520630 |
|   | 7  | 50461209 | 50469708 | NM_172901    | chr7  | 50465293 | 50465969 |
|   | 9  | 50409232 | 50418010 | NM_145614    | chr9  | 50410877 | 50411552 |
|   | 14 | 50277707 | 50286206 | NM_001039250 | chr14 | 50280549 | 50281226 |
|   | 14 | 49844267 | 49858800 | NM_001033271 | chr14 | 49856435 | 49857005 |
|   | 3  | 49850958 | 49859476 | NM_130448    | chr3  | 49851343 | 49852505 |
|   | 14 | 49840929 | 49849471 | NM_009687    | chr14 | 49841430 | 49842023 |
| X |    | 49835810 | 49844309 | NM_024170    | chrX  | 49839291 | 49839868 |
|   | 14 | 49626283 | 49634782 | NM_001011837 | chr14 | 49632797 | 49633326 |

|   |    |          |          |              |       |          |          |
|---|----|----------|----------|--------------|-------|----------|----------|
|   | 2  | 49603695 | 49612194 | NM_027990    | chr2  | 49604194 | 49604803 |
|   | 14 | 49601097 | 49609596 | NM_207156    | chr14 | 49602849 | 49603680 |
|   | 14 | 49569190 | 49577689 | NM_146298    | chr14 | 49575669 | 49576389 |
|   | 13 | 49550424 | 49566082 | NM_025711    | chr13 | 49555576 | 49556174 |
|   | 4  | 49536325 | 49544909 | NM_145547    | chr4  | 49541494 | 49542386 |
|   | 4  | 49539661 | 49548183 | NM_178603    | chr4  | 49541494 | 49542386 |
|   | 7  | 49502357 | 49510856 | NM_001005232 | chr7  | 49506821 | 49507484 |
|   | 10 | 49469325 | 49483082 | NM_010349    | chr10 | 49479085 | 49479730 |
|   | 10 | 49469325 | 49483082 | NM_010349    | chr10 | 49469951 | 49470563 |
|   | 11 | 49401346 | 49409845 | NM_207573    | chr11 | 49408194 | 49408902 |
|   | 11 | 49401346 | 49409845 | NM_207573    | chr11 | 49402282 | 49402821 |
|   | 11 | 49401346 | 49409845 | NM_207573    | chr11 | 49401356 | 49402085 |
| X |    | 49356519 | 49365032 | NM_019538    | chrX  | 49362845 | 49363430 |
| X |    | 49356519 | 49365032 | NM_019538    | chrX  | 49356841 | 49357874 |
|   | 14 | 49329497 | 49337996 | NM_146420    | chr14 | 49335248 | 49336164 |
|   | 14 | 49329497 | 49337996 | NM_146420    | chr14 | 49333105 | 49333801 |
|   | 11 | 49297104 | 49305603 | NM_146473    | chr11 | 49298147 | 49299229 |
|   | 11 | 49281276 | 49293289 | NM_146467    | chr11 | 49286427 | 49287330 |
|   | 6  | 49242939 | 49251490 | NM_175098    | chr6  | 49245074 | 49245653 |
| X |    | 49226705 | 49235328 | NM_013556    | chrX  | 49233291 | 49233893 |
| X |    | 49150867 | 49159434 | NM_027642    | chrX  | 49157593 | 49158451 |
| X |    | 49150867 | 49159434 | NM_027642    | chrX  | 49156143 | 49157095 |
| X |    | 49014884 | 49023399 | NM_009092    | chrX  | 49018852 | 49019693 |
|   | 9  | 48996463 | 49004962 | NM_177701    | chr9  | 49002489 | 49003483 |
|   | 16 | 48911062 | 48919716 | BC117954     | chr16 | 48910487 | 48911104 |
|   | 14 | 48880548 | 48889047 | NM_146492    | chr14 | 48883620 | 48884411 |
| X |    | 48856042 | 48864548 | NM_016697    | chrX  | 48857129 | 48857837 |
|   | 11 | 48833014 | 48847103 | NM_011579    | chr11 | 48840314 | 48841047 |
|   | 16 | 48689083 | 48697761 | NM_198297    | chr16 | 48695312 | 48696160 |
|   | 6  | 48662633 | 48678381 | NM_175035    | chr6  | 48676277 | 48677465 |
|   | 13 | 48668971 | 48679479 | NM_007526    | chr13 | 48675539 | 48676530 |
|   | 7  | 48651024 | 48659604 | NM_028031    | chr7  | 48655543 | 48656579 |
|   | 2  | 48630166 | 48639210 | NM_007396    | chr2  | 48635486 | 48636350 |
|   | 4  | 48555035 | 48564098 | NM_028137    | chr4  | 48558011 | 48558702 |
|   | 8  | 48479742 | 48488270 | NM_177304    | chr8  | 48486411 | 48487060 |
| X |    | 48407051 | 48415879 | NM_008150    | chrX  | 48407042 | 48407817 |
|   | 16 | 48344863 | 48353431 | NM_010816    | chr16 | 48348614 | 48349311 |
|   | 18 | 48164666 | 48174573 | NM_001025388 | chr18 | 48172361 | 48173145 |
|   | 7  | 48064701 | 48073200 | NM_205795    | chr7  | 48068196 | 48068841 |
| X |    | 47922597 | 47932229 | NM_001077202 | chrX  | 47927379 | 47927989 |
| X |    | 47922597 | 47932229 | NM_001077202 | chrX  | 47924638 | 47925715 |
|   | 9  | 47907968 | 47916559 | NM_172921    | chr9  | 47911489 | 47912089 |
|   | 19 | 47902300 | 47910861 | NM_010362    | chr19 | 47902538 | 47903128 |
|   | 7  | 47893120 | 47901623 | NM_207540    | chr7  | 47900264 | 47900900 |
|   | 7  | 47893120 | 47901623 | NM_207540    | chr7  | 47894141 | 47894686 |
|   | 7  | 47847618 | 47856318 | NM_153524    | chr7  | 47854644 | 47855228 |
|   | 7  | 47847618 | 47856318 | NM_153524    | chr7  | 47850887 | 47852118 |

|   |    |          |          |              |       |          |          |
|---|----|----------|----------|--------------|-------|----------|----------|
|   | 7  | 47847618 | 47856318 | NM_153524    | chr7  | 47848571 | 47849520 |
|   | 8  | 47656506 | 47670872 | NM_025747    | chr8  | 47666458 | 47667039 |
|   | 6  | 47522014 | 47530606 | NM_007971    | chr6  | 47525030 | 47525819 |
|   | 18 | 47491104 | 47500199 | NM_018744    | chr18 | 47492172 | 47492843 |
|   | 4  | 47489761 | 47498300 | NM_024171    | chr4  | 47490020 | 47490921 |
|   | 7  | 47466894 | 47475394 | NM_153067    | chr7  | 47471933 | 47472873 |
|   | 7  | 47466894 | 47475394 | NM_153067    | chr7  | 47468921 | 47469773 |
| X |    | 47447960 | 47456617 | NM_134163    | chrX  | 47451676 | 47452726 |
| X |    | 47447960 | 47456617 | NM_134163    | chrX  | 47450386 | 47451476 |
| X |    | 47447960 | 47456617 | NM_134163    | chrX  | 47448846 | 47449447 |
|   | 7  | 47394385 | 47402884 | NM_153101    | chr7  | 47399257 | 47400258 |
|   | 4  | 47368405 | 47376904 | NM_009370    | chr4  | 47374694 | 47375559 |
|   | 19 | 47309478 | 47318114 | NM_177833    | chr19 | 47311375 | 47312147 |
| X |    | 47260107 | 47268645 | NM_172413    | chrX  | 47266371 | 47266936 |
| X |    | 47260107 | 47268645 | NM_172413    | chrX  | 47263937 | 47264627 |
| X |    | 47260107 | 47268645 | NM_172413    | chrX  | 47261056 | 47262110 |
|   | 17 | 47242935 | 47251455 | NM_011549    | chr17 | 47249151 | 47249829 |
|   | 19 | 47226131 | 47235061 | NM_021360    | chr19 | 47233700 | 47234409 |
|   | 7  | 47219763 | 47228262 | NM_153095    | chr7  | 47225791 | 47226618 |
|   | 7  | 47219763 | 47228262 | NM_153095    | chr7  | 47221562 | 47222666 |
|   | 19 | 47175600 | 47184586 | BC051231     | chr19 | 47180013 | 47180935 |
|   | 4  | 47107042 | 47115552 | NM_172693    | chr4  | 47113838 | 47114452 |
|   | 14 | 47100957 | 47109456 | BC027062     | chr14 | 47103356 | 47103957 |
|   | 17 | 46861128 | 46869775 | NM_008189    | chr17 | 46863803 | 46864501 |
|   | 17 | 46751260 | 46759759 | AY081774     | chr17 | 46755543 | 46757495 |
|   | 7  | 46598087 | 46617022 | NM_011316    | chr7  | 46602633 | 46603572 |
|   | 19 | 46444229 | 46452768 | NM_015752    | chr19 | 46450540 | 46451342 |
|   | 19 | 46446538 | 46455052 | NM_016860    | chr19 | 46450540 | 46451342 |
|   | 4  | 46359294 | 46367793 | NM_183298    | chr4  | 46366231 | 46367278 |
|   | 7  | 46258970 | 46268172 | NM_008421    | chr7  | 46265128 | 46265899 |
| X |    | 46252363 | 46260862 | NM_146390    | chrX  | 46257876 | 46258466 |
| X |    | 46252363 | 46260862 | NM_146390    | chrX  | 46253091 | 46253923 |
|   | 7  | 46238516 | 46247081 | NM_010866    | chr7  | 46245769 | 46246424 |
|   | 11 | 46153217 | 46161773 | NM_133769    | chr11 | 46158203 | 46158989 |
|   | 19 | 46123174 | 46131823 | NM_001039352 | chr19 | 46128678 | 46129617 |
|   | 4  | 46076066 | 46084589 | NM_021883    | chr4  | 46077087 | 46078165 |
|   | 17 | 45998766 | 46007265 | BC041674     | chr17 | 46002119 | 46002812 |
|   | 9  | 45978928 | 46000417 | NM_023114    | chr9  | 45983505 | 45984107 |
| X |    | 45970127 | 45978626 | NM_207631    | chrX  | 45978067 | 45978528 |
| X |    | 45970127 | 45978626 | NM_207631    | chrX  | 45973923 | 45974532 |
| X |    | 45922131 | 45930630 | NM_207240    | chrX  | 45928048 | 45929163 |
|   | 17 | 45898319 | 45916403 | NM_144856    | chr17 | 45902011 | 45902668 |
|   | 4  | 45845416 | 45853915 | NM_018741    | chr4  | 45848289 | 45848908 |
|   | 4  | 45806022 | 45822717 | NM_028270    | chr4  | 45815419 | 45816180 |
|   | 16 | 45761216 | 45769715 | NM_153412    | chr16 | 45763855 | 45764753 |
|   | 14 | 45741550 | 45758367 | NM_022023    | chr14 | 45747884 | 45748828 |
|   | 14 | 45748108 | 45756620 | NM_026832    | chr14 | 45747884 | 45748828 |

|   |    |          |                       |       |          |          |
|---|----|----------|-----------------------|-------|----------|----------|
|   | 9  | 45651564 | 45662050 NM_008794    | chr9  | 45656928 | 45657937 |
|   | 9  | 45653418 | 45663882 NM_178709    | chr9  | 45656928 | 45657937 |
|   | 7  | 45562009 | 45575825 NM_016974    | chr7  | 45574505 | 45575264 |
|   | 7  | 45531851 | 45540436 NM_018876    | chr7  | 45532701 | 45533498 |
| X |    | 45530344 | 45538869 NM_145951    | chrX  | 45531005 | 45531655 |
|   | 7  | 45479648 | 45512317 NM_028544    | chr7  | 45503515 | 45504133 |
|   | 12 | 45447332 | 45455831 AY528242     | chr12 | 45450877 | 45451545 |
|   | 12 | 45447332 | 45455831 AY528242     | chr12 | 45449772 | 45450789 |
|   | 7  | 45418086 | 45440904 NM_009737    | chr7  | 45435819 | 45436683 |
|   | 7  | 45388372 | 45400534 NM_148927    | chr7  | 45391405 | 45392027 |
|   | 7  | 45391756 | 45400255 NM_008654    | chr7  | 45391405 | 45392027 |
|   | 13 | 45087635 | 45096134 BC099463     | chr13 | 45089805 | 45090397 |
|   | 13 | 45087635 | 45096134 BC099463     | chr13 | 45086583 | 45087772 |
|   | 17 | 45053406 | 45071648 NM_022880    | chr17 | 45059119 | 45059787 |
|   | 7  | 45016396 | 45040099 NM_182993    | chr7  | 45036131 | 45040065 |
|   | 8  | 45018281 | 45026780 NM_001009547 | chr8  | 45020137 | 45021003 |
|   | 7  | 45016396 | 45040099 NM_182993    | chr7  | 45019860 | 45020473 |
|   | 7  | 45020081 | 45028580 NM_145954    | chr7  | 45019860 | 45020473 |
|   | 8  | 45018281 | 45026780 NM_001009547 | chr8  | 45018643 | 45019225 |
|   | 16 | 45007385 | 45015995 NM_026439    | chr16 | 45014456 | 45015067 |
| X |    | 44862205 | 44871123 NM_011398    | chrX  | 44868810 | 44869813 |
|   | 9  | 44787552 | 44796057 NM_007962    | chr9  | 44790497 | 44791090 |
|   | 4  | 44771668 | 44780255 NM_177027    | chr4  | 44773532 | 44774161 |
| X |    | 44755517 | 44764053 NM_012019    | chrX  | 44756904 | 44757568 |
|   | 2  | 44575876 | 44584375 BC052069     | chr2  | 44582347 | 44583307 |
| X |    | 44495535 | 44504036 NM_028276    | chrX  | 44501000 | 44502051 |
|   | 16 | 44414042 | 44422541 BC056138     | chr16 | 44420923 | 44421533 |
|   | 18 | 44389458 | 44398099 NM_010935    | chr18 | 44391457 | 44392052 |
| X |    | 44385154 | 44393668 NM_028773    | chrX  | 44391213 | 44391858 |
|   | 9  | 44244131 | 44262370 NM_030256    | chr9  | 44257706 | 44258532 |
|   | 16 | 44249671 | 44258528 NM_198034    | chr16 | 44252487 | 44253519 |
|   | 19 | 44243185 | 44251753 NM_181422    | chr19 | 44249991 | 44250842 |
|   | 19 | 44250599 | 44259200 NM_024450    | chr19 | 44249991 | 44250842 |
|   | 9  | 44244131 | 44262370 NM_030256    | chr9  | 44246060 | 44246943 |
| X |    | 44198916 | 44207415 BC054840     | chrX  | 44205923 | 44206604 |
|   | 1  | 44086393 | 44095096 NM_011729    | chr1  | 44091486 | 44092072 |
|   | 4  | 43998604 | 44007103 NM_001002787 | chr4  | 44000278 | 44000868 |
|   | 4  | 43447735 | 43456234 NM_177377    | chr4  | 43447998 | 43448736 |
|   | 13 | 43403348 | 43411847 NM_023554    | chr13 | 43405659 | 43407680 |
|   | 10 | 43261584 | 43270103 NM_009846    | chr10 | 43268511 | 43269657 |
|   | 18 | 43182241 | 43190802 NM_028392    | chr18 | 43188959 | 43189672 |
|   | 17 | 43090855 | 43099354 NM_198418    | chr17 | 43090850 | 43092139 |
|   | 6  | 43076869 | 43085368 NM_146654    | chr6  | 43078640 | 43079326 |
|   | 4  | 43019012 | 43027555 NM_009503    | chr4  | 43021316 | 43021978 |
|   | 15 | 42997735 | 43006892 NM_172815    | chr15 | 43002160 | 43003221 |
|   | 6  | 42741080 | 42749579 NM_146445    | chr6  | 42747539 | 42748240 |
|   | 6  | 42713648 | 42722147 NM_001011869 | chr6  | 42717071 | 42717705 |

|    |          |          |              |       |          |          |
|----|----------|----------|--------------|-------|----------|----------|
| 6  | 42685661 | 42694160 | NM_146986    | chr6  | 42691727 | 42692461 |
| 10 | 42543132 | 42551631 | NM_172938    | chr10 | 42545003 | 42545648 |
| 13 | 42306448 | 42315355 | NM_010104    | chr13 | 42309098 | 42309757 |
| 7  | 42218734 | 42227233 | NM_027702    | chr7  | 42218748 | 42219407 |
| 19 | 42179805 | 42188338 | NM_027106    | chr19 | 42183242 | 42183840 |
| 10 | 42164330 | 42172830 | NM_145743    | chr10 | 42165392 | 42166004 |
| 9  | 42148425 | 42156924 | NM_009347    | chr9  | 42153755 | 42154355 |
| 8  | 42131104 | 42139609 | NM_001040699 | chr8  | 42132563 | 42133560 |
| 5  | 42049969 | 42058748 | NM_007524    | chr5  | 42055377 | 42056044 |
| 5  | 42049969 | 42058748 | NM_007524    | chr5  | 42051875 | 42052944 |
| 4  | 41979785 | 41988284 | BC051472     | chr4  | 41985807 | 41986478 |
| 4  | 41927285 | 41935824 | NM_011014    | chr4  | 41934353 | 41935531 |
| 9  | 41872785 | 41881284 | NM_011436    | chr9  | 41874785 | 41875500 |
| 11 | 41841243 | 41850101 | NM_177408    | chr11 | 41845755 | 41846388 |
| 11 | 41841243 | 41850101 | NM_177408    | chr11 | 41843790 | 41844405 |
| 13 | 41654417 | 41662916 | NM_177808    | chr13 | 41658586 | 41658958 |
| 4  | 41318687 | 41327191 | NM_026275    | chr4  | 41323508 | 41324415 |
| 13 | 41228861 | 41237367 | NM_019423    | chr13 | 41231101 | 41232517 |
| 6  | 41225876 | 41234378 | NM_011646    | chr6  | 41230052 | 41230664 |
| 13 | 41088115 | 41096616 | BC050009     | chr13 | 41090178 | 41090761 |
| 7  | 41051480 | 41059979 | NM_001033782 | chr7  | 41056075 | 41056877 |
| 6  | 40983013 | 40994450 | BC055922     | chr6  | 40987644 | 40988233 |
| 9  | 40906036 | 40914563 | NM_176860    | chr9  | 40908944 | 40909640 |
| 19 | 40878590 | 40887118 | NM_172839    | chr19 | 40884373 | 40885423 |
| 13 | 40742273 | 40751894 | NM_011547    | chr13 | 40745349 | 40746284 |
| 7  | 40666353 | 40674852 | NM_021387    | chr7  | 40671654 | 40672288 |
| 12 | 40642107 | 40650613 | NM_009132    | chr12 | 40642891 | 40643562 |
| 1  | 40620171 | 40628757 | NM_001033289 | chr1  | 40626749 | 40627354 |
| X  | 40610470 | 40618969 | NM_175539    | chrX  | 40610814 | 40611740 |
| 6  | 40249102 | 40257614 | NM_023538    | chr6  | 40255396 | 40255988 |
| 14 | 40089349 | 40099876 | NM_009160    | chr14 | 40098243 | 40098946 |
| 9  | 39931650 | 39945458 | NM_030713    | chr9  | 39939053 | 39939768 |
| 9  | 39931650 | 39945458 | NM_030713    | chr9  | 39934753 | 39935620 |
| 18 | 39893471 | 39901991 | NM_011033    | chr18 | 39900043 | 39901358 |
| 9  | 39818868 | 39827367 | NM_146854    | chr9  | 39824035 | 39824962 |
| 9  | 39698841 | 39713640 | NM_146367    | chr9  | 39707505 | 39708191 |
| 9  | 39450839 | 39459338 | NM_207138    | chr9  | 39452334 | 39454154 |
| 9  | 39367696 | 39376195 | NM_146279    | chr9  | 39374035 | 39374661 |
| 9  | 39298941 | 39307440 | NM_146330    | chr9  | 39300516 | 39301327 |
| 9  | 39233323 | 39241822 | NM_146830    | chr9  | 39238294 | 39239081 |
| 7  | 39184821 | 39193364 | NM_177890    | chr7  | 39187685 | 39188572 |
| 7  | 39184821 | 39193364 | NM_177890    | chr7  | 39185672 | 39186324 |
| 10 | 39138331 | 39146830 | BC032149     | chr10 | 39144762 | 39145420 |
| 13 | 38965496 | 38973998 | NM_134060    | chr13 | 38968495 | 38969159 |
| 9  | 38826888 | 38835387 | NM_146438    | chr9  | 38828437 | 38829200 |
| 9  | 38743505 | 38752004 | NM_146746    | chr9  | 38743849 | 38744465 |
| 9  | 38731114 | 38739613 | NM_146442    | chr9  | 38732641 | 38733596 |



|    |          |          |              |       |          |          |
|----|----------|----------|--------------|-------|----------|----------|
| 9  | 38720222 | 38728721 | NM_146441    | chr9  | 38722966 | 38723925 |
| 9  | 38674660 | 38683161 | NM_146272    | chr9  | 38680887 | 38681491 |
| 13 | 38640033 | 38648575 | NM_139063    | chr13 | 38642164 | 38643176 |
| 19 | 38583341 | 38591840 | NM_019588    | chr19 | 38589005 | 38590347 |
| 2  | 38530297 | 38542513 | NM_139051    | chr2  | 38532866 | 38533555 |
| 9  | 38446448 | 38454947 | NM_146440    | chr9  | 38447818 | 38448613 |
| 9  | 38406462 | 38430052 | NM_146375    | chr9  | 38406822 | 38407421 |
| 9  | 38283468 | 38291967 | NM_146811    | chr9  | 38284171 | 38284855 |
| 13 | 38197950 | 38214932 | NM_026382    | chr13 | 38201993 | 38205586 |
| 13 | 38197950 | 38214932 | NM_026382    | chr13 | 38198297 | 38200471 |
| 19 | 38191925 | 38200424 | NM_033614    | chr19 | 38197618 | 38198502 |
| 9  | 38122454 | 38130953 | NM_146874    | chr9  | 38128367 | 38128994 |
| 9  | 38093656 | 38102155 | NM_146871    | chr9  | 38099519 | 38100157 |
| 13 | 38038748 | 38047260 | NM_024242    | chr13 | 38044723 | 38045312 |
| 13 | 38042036 | 38050535 | NM_027724    | chr13 | 38044723 | 38045312 |
| 6  | 38032961 | 38041468 | BC119477     | chr6  | 38038270 | 38038858 |
| 6  | 38036658 | 38045157 | BC046979     | chr6  | 38038270 | 38038858 |
| 18 | 37935053 | 37948127 | NM_033582    | chr18 | 37946444 | 37947206 |
| 17 | 37937212 | 37945711 | NM_146807    | chr17 | 37943057 | 37944462 |
| 17 | 37911013 | 37919512 | NM_146488    | chr17 | 37915521 | 37916390 |
| 17 | 37911013 | 37919512 | NM_146488    | chr17 | 37912129 | 37913515 |
| 9  | 37853259 | 37868868 | NM_146424    | chr9  | 37863871 | 37864555 |
| 1  | 37858540 | 37867039 | NM_001033427 | chr1  | 37860470 | 37861058 |
| 9  | 37829409 | 37837908 | NM_146423    | chr9  | 37830656 | 37831693 |
| 16 | 37829735 | 37838234 | NM_153394    | chr16 | 37830060 | 37830901 |
| 18 | 37794309 | 37822874 | NM_033586    | chr18 | 37819538 | 37822832 |
| 18 | 37794309 | 37822874 | NM_033586    | chr18 | 37817851 | 37819148 |
| 17 | 37810222 | 37818721 | NM_146332    | chr17 | 37816191 | 37817178 |
| 18 | 37794309 | 37822874 | NM_033586    | chr18 | 37814500 | 37817799 |
| 18 | 37794309 | 37822874 | NM_033586    | chr18 | 37811397 | 37813698 |
| 18 | 37794309 | 37822874 | NM_033586    | chr18 | 37809707 | 37811308 |
| 18 | 37794309 | 37822874 | NM_033586    | chr18 | 37808318 | 37809494 |
| 18 | 37794309 | 37822874 | NM_033586    | chr18 | 37805591 | 37808230 |
| 18 | 37794309 | 37822874 | NM_033586    | chr18 | 37802533 | 37803760 |
| 6  | 37794419 | 37803180 | NM_145076    | chr6  | 37802413 | 37803150 |
| 18 | 37794309 | 37822874 | NM_033586    | chr18 | 37799471 | 37801961 |
| 18 | 37794309 | 37822874 | NM_033586    | chr18 | 37794309 | 37796489 |
| 18 | 37776379 | 37790418 | NM_033585    | chr18 | 37788379 | 37789725 |
| 18 | 37776379 | 37790418 | NM_033585    | chr18 | 37787450 | 37788034 |
| 18 | 37776379 | 37790418 | NM_033585    | chr18 | 37785551 | 37786217 |
| 18 | 37776379 | 37790418 | NM_033585    | chr18 | 37782240 | 37782842 |
| 18 | 37776405 | 37784904 | BC082294     | chr18 | 37782240 | 37782842 |
| 18 | 37776379 | 37790418 | NM_033585    | chr18 | 37778539 | 37779251 |
| 18 | 37776405 | 37784904 | BC082294     | chr18 | 37778539 | 37779251 |
| 18 | 37762040 | 37776140 | NM_175770    | chr18 | 37769208 | 37769845 |
| 18 | 37762040 | 37776140 | NM_175770    | chr18 | 37763320 | 37764461 |
| 17 | 37688530 | 37697029 | NM_146867    | chr17 | 37689926 | 37690739 |

|    |          |          |           |       |          |          |
|----|----------|----------|-----------|-------|----------|----------|
| 17 | 37661145 | 37669644 | NM_146327 | chr17 | 37668284 | 37668866 |
| 17 | 37661145 | 37669644 | NM_146327 | chr17 | 37662434 | 37663628 |
| 18 | 37633626 | 37646832 | NM_053147 | chr18 | 37642904 | 37646324 |
| 18 | 37633626 | 37646832 | NM_053147 | chr18 | 37640167 | 37641459 |
| 18 | 37633626 | 37646832 | NM_053147 | chr18 | 37638959 | 37639780 |
| 18 | 37593514 | 37632802 | NM_053143 | chr18 | 37631133 | 37632031 |
| 18 | 37593514 | 37632802 | NM_053143 | chr18 | 37626819 | 37627987 |
| 18 | 37593514 | 37632802 | NM_053143 | chr18 | 37624855 | 37625910 |
| 18 | 37593514 | 37632802 | NM_053143 | chr18 | 37623129 | 37624728 |
| 18 | 37593514 | 37632802 | NM_053143 | chr18 | 37621751 | 37622834 |
| 18 | 37593514 | 37632802 | NM_053143 | chr18 | 37617621 | 37619842 |
| 18 | 37593514 | 37632802 | NM_053143 | chr18 | 37615380 | 37617216 |
| 18 | 37593514 | 37632802 | NM_053143 | chr18 | 37614498 | 37615293 |
| 12 | 37612812 | 37621412 | NM_008584 | chr12 | 37614230 | 37614900 |
| 18 | 37593514 | 37632802 | NM_053143 | chr18 | 37610926 | 37612796 |
| 18 | 37593514 | 37632802 | NM_053143 | chr18 | 37604348 | 37605535 |
| 18 | 37593514 | 37632802 | NM_053143 | chr18 | 37599737 | 37602974 |
| 18 | 37555759 | 37576153 | NM_053139 | chr18 | 37574267 | 37575417 |
| 18 | 37555759 | 37576153 | NM_053139 | chr18 | 37572345 | 37573315 |
| 3  | 37566304 | 37574803 | AY027557  | chr3  | 37570161 | 37570676 |
| 18 | 37555759 | 37576153 | NM_053139 | chr18 | 37568127 | 37570234 |
| 8  | 37557378 | 37570967 | NM_172911 | chr8  | 37565914 | 37566512 |
| 18 | 37555759 | 37576153 | NM_053139 | chr18 | 37565353 | 37566061 |
| 18 | 37555759 | 37576153 | NM_053139 | chr18 | 37561342 | 37563544 |
| 18 | 37555759 | 37576153 | NM_053139 | chr18 | 37560343 | 37561190 |
| 18 | 37541392 | 37549891 | NM_053136 | chr18 | 37547102 | 37549348 |
| 18 | 37541392 | 37549891 | NM_053136 | chr18 | 37542602 | 37543313 |
| 18 | 37531648 | 37540147 | NM_053135 | chr18 | 37537677 | 37539468 |
| 5  | 37524329 | 37536767 | NM_007765 | chr5  | 37533391 | 37534658 |
| 18 | 37531648 | 37540147 | NM_053135 | chr18 | 37532112 | 37532525 |
| 5  | 37524329 | 37536767 | NM_007765 | chr5  | 37531169 | 37531796 |
| 5  | 37524329 | 37536767 | NM_007765 | chr5  | 37529557 | 37530619 |
| 17 | 37505601 | 37514100 | NM_146377 | chr17 | 37512968 | 37513576 |
| 17 | 37505601 | 37514100 | NM_146377 | chr17 | 37510827 | 37511721 |
| 18 | 37475245 | 37483744 | NM_053133 | chr18 | 37481044 | 37482909 |
| 18 | 37454002 | 37470213 | NM_053132 | chr18 | 37467039 | 37469659 |
| 18 | 37454002 | 37470213 | NM_053132 | chr18 | 37463413 | 37463999 |
| 18 | 37454002 | 37470213 | NM_053132 | chr18 | 37462014 | 37463114 |
| 18 | 37454002 | 37470213 | NM_053132 | chr18 | 37459466 | 37461805 |
| 18 | 37440355 | 37448912 | NM_053130 | chr18 | 37446826 | 37448368 |
| 18 | 37440355 | 37448912 | NM_053130 | chr18 | 37445637 | 37446407 |
| 18 | 37414814 | 37435955 | NM_053128 | chr18 | 37433522 | 37435056 |
| 18 | 37414814 | 37435955 | NM_053128 | chr18 | 37427731 | 37428620 |
| 18 | 37414814 | 37435955 | NM_053128 | chr18 | 37421790 | 37422387 |
| 17 | 37407122 | 37415621 | NM_147062 | chr17 | 37413565 | 37414157 |
| 17 | 37407122 | 37415621 | NM_147062 | chr17 | 37412439 | 37413046 |
| 17 | 37397499 | 37405998 | NM_146630 | chr17 | 37403427 | 37404105 |

|    |          |          |              |       |          |          |
|----|----------|----------|--------------|-------|----------|----------|
| 17 | 37350919 | 37359418 | NM_146629    | chr17 | 37356424 | 37357038 |
| 17 | 37328052 | 37336551 | NM_146631    | chr17 | 37334201 | 37334946 |
| 17 | 37274078 | 37282577 | NM_213721    | chr17 | 37280232 | 37280942 |
| 17 | 37265885 | 37274384 | NM_207155    | chr17 | 37267286 | 37268266 |
| 17 | 37230187 | 37238686 | NM_146632    | chr17 | 37237287 | 37237902 |
| 17 | 37195905 | 37204404 | NM_146287    | chr17 | 37198176 | 37198810 |
| 17 | 37175003 | 37189474 | NM_001013575 | chr17 | 37182510 | 37183487 |
| 17 | 37100706 | 37109205 | NM_146328    | chr17 | 37106223 | 37106837 |
| 18 | 37087605 | 37102275 | NM_001003672 | chr18 | 37099834 | 37101291 |
| 18 | 37087605 | 37102275 | NM_001003672 | chr18 | 37098429 | 37099387 |
| 18 | 37087605 | 37102275 | NM_001003672 | chr18 | 37094001 | 37095123 |
| 18 | 37087605 | 37102275 | NM_001003672 | chr18 | 37088364 | 37088906 |
| 18 | 37072649 | 37081214 | NM_007766    | chr18 | 37079161 | 37079988 |
| 17 | 37068261 | 37076760 | NM_146835    | chr17 | 37074159 | 37075154 |
| 18 | 37072649 | 37081214 | NM_007766    | chr18 | 37072643 | 37073426 |
| 18 | 37050158 | 37058657 | NM_198117    | chr18 | 37055450 | 37057587 |
| 13 | 37054171 | 37062670 | NM_028784    | chr13 | 37054461 | 37055640 |
| 2  | 37035500 | 37043999 | NM_001005569 | chr2  | 37036720 | 37037216 |
| 17 | 37007603 | 37016102 | NM_146511    | chr17 | 37013886 | 37014609 |
| 17 | 36984560 | 36993059 | NM_001011744 | chr17 | 36985187 | 36985941 |
| 9  | 36952004 | 36960503 | NM_025464    | chr9  | 36956745 | 36957409 |
| 2  | 36905256 | 36913755 | NM_146368    | chr2  | 36912515 | 36913246 |
| 17 | 36885972 | 36894471 | NM_146515    | chr17 | 36891639 | 36892257 |
| 2  | 36825157 | 36833656 | NM_207235    | chr2  | 36831768 | 36832376 |
| 2  | 36825157 | 36833656 | NM_207235    | chr2  | 36826661 | 36827371 |
| 18 | 36799566 | 36810068 | NM_026404    | chr18 | 36807829 | 36808547 |
| 18 | 36802841 | 36811340 | NM_146085    | chr18 | 36807829 | 36808547 |
| 2  | 36747622 | 36756121 | NM_146625    | chr2  | 36748512 | 36749252 |
| 2  | 36722920 | 36733603 | NM_146939    | chr2  | 36727238 | 36727856 |
| 2  | 36710356 | 36718855 | NM_146941    | chr2  | 36713085 | 36713880 |
| 2  | 36666057 | 36674556 | NM_146627    | chr2  | 36672399 | 36673430 |
| 10 | 36657960 | 36666499 | NM_008229    | chr10 | 36663106 | 36663799 |
| 2  | 36602536 | 36617746 | NM_146944    | chr2  | 36610311 | 36610769 |
| 2  | 36602536 | 36617746 | NM_146944    | chr2  | 36608805 | 36609833 |
| 17 | 36586791 | 36603577 | NM_029747    | chr17 | 36588590 | 36589191 |
| 1  | 36531337 | 36543878 | BC114576     | chr1  | 36537199 | 36537916 |
| 2  | 36456050 | 36464549 | NM_146945    | chr2  | 36462152 | 36463142 |
| 6  | 36447362 | 36455861 | NM_203491    | chr6  | 36452931 | 36454726 |
| 2  | 36384609 | 36393108 | NM_146628    | chr2  | 36387391 | 36388429 |
| 2  | 36343397 | 36351896 | NM_146948    | chr2  | 36343942 | 36344849 |
| 17 | 36277751 | 36286250 | NM_177636    | chr17 | 36278129 | 36278732 |
| 2  | 36268596 | 36277095 | NM_146951    | chr2  | 36274578 | 36275607 |
| 1  | 36246300 | 36254826 | NM_145996    | chr1  | 36252277 | 36252949 |
| 17 | 36248198 | 36256697 | NM_008205    | chr17 | 36249072 | 36249800 |
| 2  | 36192787 | 36201286 | NM_146947    | chr2  | 36198769 | 36199720 |
| 19 | 36182440 | 36190986 | NM_013468    | chr19 | 36187705 | 36189448 |
| 5  | 35993834 | 36002643 | NM_030127    | chr5  | 35997298 | 35997947 |

|   |    |          |                       |       |          |          |
|---|----|----------|-----------------------|-------|----------|----------|
|   | 18 | 35949792 | 35958291 NM_133687    | chr18 | 35954767 | 35955430 |
|   | 17 | 35481872 | 35490377 NM_026987    | chr17 | 35487790 | 35488391 |
|   | 2  | 35477501 | 35486000 AY305656     | chr2  | 35485226 | 35485824 |
|   | 4  | 35412511 | 35421010 BC076612     | chr4  | 35414976 | 35415592 |
|   | 5  | 35367723 | 35376444 NM_172708    | chr5  | 35373170 | 35373837 |
|   | 5  | 35352417 | 35360948 NM_019447    | chr5  | 35356418 | 35357037 |
|   | 6  | 35253763 | 35262293 NM_173375    | chr6  | 35254506 | 35255309 |
|   | 15 | 35234687 | 35243393 NM_054049    | chr15 | 35240536 | 35241473 |
|   | 18 | 35238863 | 35247405 NM_009818    | chr18 | 35239865 | 35240546 |
|   | 15 | 35234687 | 35243393 NM_054049    | chr15 | 35238600 | 35239190 |
|   | 5  | 35226772 | 35236203 NM_207277    | chr5  | 35229476 | 35230119 |
|   | 12 | 35111622 | 35120121 NM_024124    | chr12 | 35117828 | 35118453 |
|   | 2  | 35072420 | 35080919 BC060377     | chr2  | 35077395 | 35078558 |
|   | 18 | 34979797 | 34989704 NM_007913    | chr18 | 34986178 | 34987011 |
|   | 11 | 34958881 | 34967380 NM_011412    | chr11 | 34964328 | 34964929 |
|   | 16 | 34936168 | 34944691 NM_023587    | chr16 | 34942589 | 34943114 |
|   | 14 | 34918406 | 34926953 NM_175008    | chr14 | 34925418 | 34926280 |
|   | 7  | 34889178 | 34897730 NM_017394    | chr7  | 34893202 | 34893790 |
|   | 9  | 34676681 | 34685180 NM_001002772 | chr9  | 34681940 | 34682549 |
|   | 2  | 34642691 | 34661686 NM_013890    | chr2  | 34659149 | 34659740 |
|   | 2  | 34642691 | 34661686 NM_013890    | chr2  | 34655083 | 34655699 |
|   | 2  | 34642691 | 34661686 NM_013890    | chr2  | 34652677 | 34653204 |
|   | 14 | 34638966 | 34647467 NM_001033766 | chr14 | 34641073 | 34641967 |
|   | 15 | 34620794 | 34629801 NM_145469    | chr15 | 34624512 | 34625699 |
|   | 2  | 34619298 | 34627800 NM_145522    | chr2  | 34624048 | 34624648 |
|   | 7  | 34615153 | 34623686 NM_008820    | chr7  | 34617030 | 34617642 |
|   | 5  | 34602682 | 34611183 NM_001015039 | chr5  | 34606783 | 34607380 |
|   | 12 | 34507672 | 34516179 NM_033522    | chr12 | 34512660 | 34513340 |
|   | 17 | 34496615 | 34509054 NM_145830    | chr17 | 34502001 | 34502613 |
|   | 17 | 34452447 | 34460994 NM_001045864 | chr17 | 34452620 | 34453217 |
|   | 17 | 34439139 | 34447638 NM_033613    | chr17 | 34444209 | 34444939 |
|   | 6  | 34400489 | 34409013 NM_007563    | chr6  | 34402166 | 34402643 |
|   | 5  | 34306841 | 34316259 NM_001001985 | chr5  | 34312954 | 34313730 |
| X |    | 34305102 | 34313657 NM_001024850 | chrX  | 34310122 | 34311106 |
|   | 4  | 34266163 | 34274707 BC079564     | chr4  | 34267327 | 34268244 |
|   | 17 | 34231742 | 34241185 NM_030890    | chr17 | 34238320 | 34239048 |
|   | 17 | 34232654 | 34241402 NM_019441    | chr17 | 34238320 | 34239048 |
|   | 9  | 34232296 | 34241000 NM_026324    | chr9  | 34235005 | 34235798 |
|   | 2  | 34191446 | 34200047 NM_016768    | chr2  | 34193511 | 34194217 |
| X |    | 34143837 | 34152397 NM_023894    | chrX  | 34145421 | 34146144 |
|   | 1  | 34098878 | 34107377 AF396877     | chr1  | 34102434 | 34103079 |
| X |    | 34065674 | 34078812 NM_001025086 | chrX  | 34071003 | 34072081 |
|   | 5  | 34032581 | 34041754 NM_008010    | chr5  | 34038306 | 34039015 |
|   | 17 | 33956403 | 33964902 NM_079835    | chr17 | 33961371 | 33961958 |
| X |    | 33814492 | 33822991 NM_001039695 | chrX  | 33814445 | 33815106 |
| X |    | 33732451 | 33740970 NM_021300    | chrX  | 33732643 | 33733241 |
|   | 7  | 33724327 | 33732826 NM_009596    | chr7  | 33730442 | 33732374 |

|   |    |          |          |              |       |          |          |
|---|----|----------|----------|--------------|-------|----------|----------|
|   | 7  | 33724327 | 33732826 | NM_009596    | chr7  | 33729805 | 33730421 |
|   | 7  | 33720144 | 33728702 | NM_203502    | chr7  | 33726256 | 33726853 |
|   | 7  | 33724327 | 33732826 | NM_009596    | chr7  | 33726256 | 33726853 |
|   | 7  | 33720144 | 33728702 | NM_203502    | chr7  | 33721499 | 33722375 |
|   | 10 | 33706415 | 33715032 | NM_025614    | chr10 | 33708672 | 33709473 |
| X |    | 33690820 | 33699404 | NM_001039688 | chrX  | 33690850 | 33691574 |
|   | 7  | 33651242 | 33659745 | NM_178308    | chr7  | 33656492 | 33657644 |
|   | 7  | 33651242 | 33659745 | NM_178308    | chr7  | 33652344 | 33653402 |
|   | 7  | 33651242 | 33659745 | NM_178308    | chr7  | 33651250 | 33652008 |
| X |    | 33616726 | 33625287 | NM_153503    | chrX  | 33623104 | 33624006 |
| X |    | 33620093 | 33628683 | NM_019443    | chrX  | 33623104 | 33624006 |
|   | 4  | 33574901 | 33583400 | NM_001033225 | chr4  | 33576806 | 33577391 |
|   | 13 | 33486255 | 33494779 | NM_011455    | chr13 | 33489366 | 33490013 |
| X |    | 33474290 | 33482791 | NM_173779    | chrX  | 33474313 | 33474969 |
|   | 7  | 33445573 | 33454072 | NM_177446    | chr7  | 33452238 | 33454030 |
|   | 7  | 33445573 | 33454072 | NM_177446    | chr7  | 33451093 | 33451758 |
|   | 7  | 33445573 | 33454072 | NM_177446    | chr7  | 33450098 | 33450751 |
|   | 7  | 33445573 | 33454072 | NM_177446    | chr7  | 33446777 | 33448293 |
|   | 14 | 33426735 | 33435234 | NM_013887    | chr14 | 33433833 | 33434461 |
|   | 5  | 33415076 | 33423607 | NM_019810    | chr5  | 33421234 | 33422203 |
|   | 13 | 33325542 | 33334041 | NM_183197    | chr13 | 33331012 | 33331607 |
|   | 13 | 33325542 | 33334041 | NM_183197    | chr13 | 33328500 | 33330300 |
| X |    | 33221094 | 33229616 | NM_007451    | chrX  | 33225755 | 33226945 |
|   | 11 | 33100960 | 33109459 | NM_019916    | chr11 | 33104491 | 33105126 |
|   | 18 | 33076170 | 33084867 | NM_009793    | chr18 | 33081589 | 33082565 |
|   | 14 | 33043139 | 33051638 | NM_181529    | chr14 | 33046019 | 33046652 |
|   | 18 | 32952393 | 32966202 | NM_021367    | chr18 | 32955966 | 32956598 |
|   | 3  | 32922611 | 32931118 | NM_025316    | chr3  | 32926574 | 32927801 |
|   | 3  | 32925825 | 32934932 | NM_029017    | chr3  | 32926574 | 32927801 |
|   | 2  | 32780761 | 32789260 | NM_199302    | chr2  | 32788740 | 32789243 |
|   | 2  | 32692204 | 32700732 | NM_146119    | chr2  | 32697341 | 32698166 |
|   | 8  | 32647267 | 32663388 | NM_001012517 | chr8  | 32652639 | 32653458 |
|   | 2  | 32603915 | 32612437 | NM_025619    | chr2  | 32605647 | 32606265 |
|   | 8  | 32549597 | 32560084 | NM_025869    | chr8  | 32554950 | 32555659 |
|   | 19 | 32311533 | 32320032 | NM_144792    | chr19 | 32318074 | 32318731 |
|   | 15 | 32285853 | 32294352 | BC065137     | chr15 | 32288175 | 32289107 |
|   | 14 | 32273721 | 32282249 | NM_016700    | chr14 | 32276895 | 32277485 |
|   | 18 | 32177472 | 32185971 | NM_032394    | chr18 | 32180829 | 32181415 |
|   | 2  | 31903215 | 31911716 | NM_175511    | chr2  | 31905854 | 31906475 |
|   | 2  | 31790490 | 31799001 | BC039282     | chr2  | 31796046 | 31796651 |
|   | 5  | 31723042 | 31731594 | NM_172993    | chr5  | 31729578 | 31730161 |
|   | 5  | 31723042 | 31731594 | NM_172993    | chr5  | 31723304 | 31724050 |
|   | 16 | 31577190 | 31586484 | NM_007862    | chr16 | 31585885 | 31586460 |
|   | 15 | 31507494 | 31516000 | NM_181588    | chr15 | 31509786 | 31510375 |
|   | 6  | 31491482 | 31500074 | NM_013723    | chr6  | 31493320 | 31493995 |
|   | 17 | 31306404 | 31314903 | NM_016670    | chr17 | 31307570 | 31308170 |
|   | 14 | 31287288 | 31300918 | NM_009891    | chr14 | 31293258 | 31294281 |

|    |          |          |              |       |          |          |
|----|----------|----------|--------------|-------|----------|----------|
| 17 | 31108961 | 31117493 | NM_008804    | chr17 | 31115311 | 31116065 |
| 7  | 31005521 | 31014020 | NM_207262    | chr7  | 31012085 | 31013134 |
| 7  | 31005521 | 31014020 | NM_207262    | chr7  | 31010685 | 31011352 |
| 7  | 31005521 | 31014020 | NM_207262    | chr7  | 31007384 | 31008620 |
| 5  | 30982145 | 30990981 | NM_023047    | chr5  | 30987448 | 30988041 |
| 6  | 30886646 | 30895145 | DQ534758     | chr6  | 30893594 | 30894333 |
| 6  | 30886646 | 30895145 | DQ534758     | chr6  | 30891586 | 30892187 |
| 6  | 30886646 | 30895145 | DQ534758     | chr6  | 30889016 | 30890867 |
| 6  | 30886646 | 30895145 | DQ534758     | chr6  | 30886374 | 30888242 |
| 2  | 30768981 | 30777510 | NM_133673    | chr2  | 30775244 | 30776017 |
| 8  | 30683073 | 30691572 | NM_153135    | chr8  | 30689620 | 30690225 |
| 6  | 30677516 | 30690576 | NM_008590    | chr6  | 30688201 | 30690351 |
| 8  | 30683073 | 30691572 | NM_153135    | chr8  | 30686976 | 30687827 |
| 6  | 30677516 | 30690576 | NM_008590    | chr6  | 30684629 | 30688180 |
| 6  | 30677516 | 30690576 | NM_008590    | chr6  | 30682320 | 30682997 |
| 13 | 30661561 | 30670073 | NM_001037955 | chr13 | 30661640 | 30662137 |
| 7  | 30479162 | 30487661 | NM_028618    | chr7  | 30484352 | 30484940 |
| 16 | 30467657 | 30476325 | NM_172614    | chr16 | 30475352 | 30475981 |
| 16 | 30227109 | 30239781 | NM_008148    | chr16 | 30228018 | 30228775 |
| 3  | 30182277 | 30190776 | NM_007963    | chr3  | 30188000 | 30188605 |
| 13 | 29991029 | 29999528 | NM_010093    | chr13 | 29996562 | 29997158 |
| 2  | 29987533 | 29996033 | NM_007931    | chr2  | 29987755 | 29989424 |
| 7  | 29938023 | 29950219 | NM_025548    | chr7  | 29944434 | 29945224 |
| 7  | 29797836 | 29815832 | NM_011981    | chr7  | 29814951 | 29815787 |
| 7  | 29797836 | 29815832 | NM_011981    | chr7  | 29812515 | 29813784 |
| 7  | 29433257 | 29441792 | NM_029714    | chr7  | 29439037 | 29439696 |
| 10 | 29222718 | 29231241 | NM_028351    | chr10 | 29229061 | 29229676 |
| 19 | 29050364 | 29058996 | NM_025950    | chr19 | 29056257 | 29056920 |
| 17 | 28962304 | 28970809 | NM_153166    | chr17 | 28964918 | 28965528 |
| 7  | 28917345 | 28928795 | NM_001039721 | chr7  | 28923670 | 28924262 |
| 7  | 28917345 | 28928795 | NM_001039721 | chr7  | 28920446 | 28922770 |
| 14 | 28546376 | 28554875 | NM_009785    | chr14 | 28548108 | 28549267 |
| 2  | 28516173 | 28524682 | NM_001033874 | chr2  | 28518249 | 28518876 |
| 17 | 28412931 | 28421599 | NM_011951    | chr17 | 28418978 | 28420116 |
| 17 | 28415077 | 28423576 | NM_146076    | chr17 | 28418978 | 28420116 |
| 16 | 28357961 | 28366504 | NM_183064    | chr16 | 28358177 | 28358878 |
| 3  | 28209231 | 28217730 | NM_008875    | chr3  | 28210942 | 28211567 |
| 7  | 28095756 | 28104274 | NM_019458    | chr7  | 28101012 | 28101785 |
| 7  | 28098934 | 28107433 | NM_026042    | chr7  | 28101012 | 28101785 |
| 17 | 28050188 | 28058693 | BC006039     | chr17 | 28055848 | 28056681 |
| 13 | 28017687 | 28026187 | NM_011165    | chr13 | 28019321 | 28019906 |
| 7  | 28008023 | 28016545 | NM_007866    | chr7  | 28014226 | 28014819 |
| 7  | 27970641 | 27979140 | NM_198425    | chr7  | 27976622 | 27977645 |
| 13 | 27587094 | 27595636 | NM_028477    | chr13 | 27588236 | 27588920 |
| 7  | 27563345 | 27571844 | NM_001024726 | chr7  | 27564685 | 27565199 |
| 7  | 27455587 | 27464086 | BC094367     | chr7  | 27458826 | 27460214 |
| 7  | 27455587 | 27464086 | BC094367     | chr7  | 27456934 | 27457801 |

|    |          |          |              |       |          |          |
|----|----------|----------|--------------|-------|----------|----------|
| 13 | 27314092 | 27322592 | NM_011166    | chr13 | 27318622 | 27319595 |
| 17 | 27278171 | 27295200 | NM_016660    | chr17 | 27292907 | 27293806 |
| 13 | 27243895 | 27252409 | NM_008865    | chr13 | 27250797 | 27251335 |
| 13 | 27198124 | 27206636 | NM_013766    | chr13 | 27202829 | 27203538 |
| 8  | 27056559 | 27070350 | BC064447     | chr8  | 27067235 | 27067888 |
| 8  | 27060533 | 27069041 | NM_173012    | chr8  | 27067235 | 27067888 |
| 2  | 26981242 | 26989741 | NM_138942    | chr2  | 26984182 | 26984811 |
| 9  | 26902327 | 26910839 | NM_023277    | chr9  | 26904181 | 26905119 |
| 13 | 26775072 | 26783584 | NM_008232    | chr13 | 26779281 | 26780097 |
| 7  | 26511682 | 26520181 | NM_013809    | chr7  | 26516977 | 26518025 |
| 7  | 26511682 | 26520181 | NM_013809    | chr7  | 26514900 | 26515314 |
| 2  | 26490791 | 26499291 | NM_010695    | chr2  | 26493036 | 26494037 |
| 16 | 26284631 | 26293188 | NM_016674    | chr16 | 26287111 | 26287838 |
| 2  | 26026051 | 26036258 | NM_001039653 | chr2  | 26029659 | 26030617 |
| 2  | 25942291 | 25950820 | NM_026495    | chr2  | 25949988 | 25950440 |
| 15 | 25879612 | 25888111 | NM_025459    | chr15 | 25884308 | 25885031 |
| 4  | 25797246 | 25805745 | AB015426     | chr4  | 25801969 | 25802682 |
| 2  | 25693870 | 25702369 | NM_175462    | chr2  | 25696417 | 25697588 |
| 2  | 25666758 | 25675257 | NM_001001714 | chr2  | 25670272 | 25670919 |
| 15 | 25561651 | 25570150 | NM_019472    | chr15 | 25566844 | 25567457 |
| 2  | 25389321 | 25408108 | NM_001005424 | chr2  | 25402115 | 25402769 |
| 15 | 25307135 | 25315634 | NM_027395    | chr15 | 25309230 | 25309954 |
| 2  | 25211912 | 25231538 | NM_009849    | chr2  | 25223069 | 25223658 |
| 17 | 25158869 | 25167385 | NM_021415    | chr17 | 25161482 | 25162297 |
| 13 | 25025345 | 25033844 | NM_001013389 | chr13 | 25027127 | 25027757 |
| 17 | 24998451 | 25007897 | NM_011665    | chr17 | 25001571 | 25002468 |
| 7  | 24985570 | 24994069 | NM_027882    | chr7  | 24989211 | 24989973 |
| 19 | 24965907 | 24974406 | NM_008022    | chr19 | 24968906 | 24969624 |
| 19 | 24965907 | 24974406 | NM_008022    | chr19 | 24965982 | 24966742 |
| 17 | 24738323 | 24746822 | NM_134126    | chr17 | 24743028 | 24743805 |
| 17 | 24740861 | 24749382 | BC057153     | chr17 | 24743028 | 24743805 |
| 18 | 24607869 | 24616370 | NM_026529    | chr18 | 24610243 | 24610860 |
| 16 | 24592996 | 24601495 | BC005613     | chr16 | 24594916 | 24595617 |
| 10 | 24523030 | 24531552 | NM_134005    | chr10 | 24528205 | 24529736 |
| 8  | 24517820 | 24526319 | NM_031158    | chr8  | 24520956 | 24521553 |
| 5  | 24349919 | 24358478 | NM_053075    | chr5  | 24351805 | 24352401 |
| 8  | 24267149 | 24277172 | NM_029505    | chr8  | 24268436 | 24269039 |
| 8  | 24217292 | 24225812 | NM_008872    | chr8  | 24218691 | 24220629 |
| 5  | 24109467 | 24118077 | NM_025891    | chr5  | 24116756 | 24117458 |
| 2  | 23969170 | 23977695 | BC119517     | chr2  | 23974354 | 23974960 |
| 8  | 23939901 | 23948400 | NM_001012667 | chr8  | 23946951 | 23947829 |
| 2  | 23916062 | 23924604 | NM_199059    | chr2  | 23922965 | 23923666 |
| 7  | 23815050 | 23823583 | NM_021307    | chr7  | 23815067 | 23817131 |
| 16 | 23803684 | 23812193 | NM_009215    | chr16 | 23804957 | 23806689 |
| 13 | 23740272 | 23773659 | NM_015786    | chr13 | 23771297 | 23771957 |
| 13 | 23761456 | 23775851 | NM_013550    | chr13 | 23771297 | 23771957 |
| 7  | 23757534 | 23766033 | NM_203489    | chr7  | 23763203 | 23765056 |

|    |          |          |              |       |          |          |
|----|----------|----------|--------------|-------|----------|----------|
| 7  | 23705871 | 23714370 | NM_207619    | chr7  | 23713399 | 23713819 |
| 17 | 23700335 | 23708852 | NM_013921    | chr17 | 23700637 | 23701636 |
| 7  | 23686822 | 23695321 | NM_207546    | chr7  | 23692411 | 23693595 |
| 7  | 23655174 | 23663673 | NM_206869    | chr7  | 23660756 | 23662230 |
| 10 | 23603772 | 23612271 | NM_053205    | chr10 | 23605866 | 23606723 |
| 7  | 23596289 | 23604788 | NM_206868    | chr7  | 23602108 | 23602698 |
| 10 | 23578273 | 23586788 | NM_011704    | chr10 | 23581978 | 23582837 |
| 10 | 23578273 | 23586788 | NM_011704    | chr10 | 23581119 | 23581465 |
| 17 | 23541895 | 23550394 | BC027781     | chr17 | 23545188 | 23547814 |
| 17 | 23447906 | 23456405 | NM_177132    | chr17 | 23453233 | 23453923 |
| 17 | 23447958 | 23462455 | NM_023058    | chr17 | 23453233 | 23453923 |
| 7  | 23361076 | 23369575 | NM_030735    | chr7  | 23367712 | 23369364 |
| 19 | 23195997 | 23210822 | NM_010638    | chr19 | 23208254 | 23208955 |
| 6  | 23195766 | 23204265 | BC119565     | chr6  | 23197286 | 23197877 |
| 6  | 23195766 | 23204265 | BC119565     | chr6  | 23195950 | 23196920 |
| 18 | 23179167 | 23190659 | NM_199024    | chr18 | 23184961 | 23185558 |
| 18 | 23179167 | 23190659 | NM_199024    | chr18 | 23182237 | 23183209 |
| 8  | 23166691 | 23175192 | NM_001007582 | chr8  | 23173405 | 23174149 |
| 11 | 23150041 | 23158540 | NM_134014    | chr11 | 23155463 | 23156390 |
| 13 | 23137950 | 23146449 | NM_134222    | chr13 | 23142425 | 23143259 |
| 13 | 23100614 | 23109113 | NM_134245    | chr13 | 23108448 | 23109088 |
| 8  | 22968801 | 22977300 | NM_183268    | chr8  | 22973964 | 22974741 |
| 8  | 22968801 | 22977300 | NM_183268    | chr8  | 22971651 | 22972241 |
| 16 | 22941844 | 22950402 | NM_201375    | chr16 | 22948014 | 22948683 |
| 17 | 22903662 | 22912161 | D10632       | chr17 | 22907240 | 22908086 |
| 17 | 22903662 | 22912161 | D10632       | chr17 | 22904599 | 22906109 |
| 11 | 22866037 | 22874536 | D17407       | chr11 | 22872227 | 22874515 |
| 1  | 22757500 | 22765999 | NM_053270    | chr1  | 22758552 | 22759198 |
| 4  | 22572887 | 22584966 | NM_008899    | chr4  | 22581176 | 22582032 |
| X  | 22516136 | 22528022 | NM_026167    | chrX  | 22520010 | 22521087 |
| 12 | 22450725 | 22459224 | NM_001004167 | chr12 | 22458609 | 22459169 |
| 12 | 22450725 | 22459224 | NM_001004167 | chr12 | 22456424 | 22457994 |
| 12 | 22450725 | 22459224 | NM_001004167 | chr12 | 22453315 | 22454829 |
| 12 | 22450725 | 22459224 | NM_001004167 | chr12 | 22451422 | 22452645 |
| 11 | 22406286 | 22414795 | NM_153596    | chr11 | 22412371 | 22413290 |
| 13 | 22396494 | 22404993 | NM_134212    | chr13 | 22402236 | 22403009 |
| 13 | 22355811 | 22364310 | NM_134220    | chr13 | 22361664 | 22362251 |
| 5  | 22059643 | 22068182 | NM_011959    | chr5  | 22066683 | 22067311 |
| 9  | 22007798 | 22016297 | NM_181419    | chr9  | 22008343 | 22009029 |
| 10 | 21969106 | 21977605 | NM_010400    | chr10 | 21972202 | 21972807 |
| 9  | 21862072 | 21873571 | NM_170777    | chr9  | 21866248 | 21867025 |
| 13 | 21785520 | 21800683 | NM_020034    | chr13 | 21793650 | 21794240 |
| 13 | 21788953 | 21797452 | NM_178202    | chr13 | 21793650 | 21794240 |
| 13 | 21736527 | 21745060 | NM_178210    | chr13 | 21736687 | 21737202 |
| 13 | 21664287 | 21672786 | NM_146541    | chr13 | 21665453 | 21666388 |
| 10 | 21565600 | 21574099 | BC070401     | chr10 | 21570821 | 21571657 |
| 13 | 21364292 | 21373543 | NM_016684    | chr13 | 21365228 | 21365998 |



|   |    |          |          |              |       |          |          |
|---|----|----------|----------|--------------|-------|----------|----------|
|   | 6  | 21160110 | 21168609 | NM_019697    | chr6  | 21166520 | 21167149 |
|   | 18 | 21081635 | 21090134 | NM_026301    | chr18 | 21087492 | 21088134 |
|   | 2  | 21052674 | 21061173 | NM_001002781 | chr2  | 21058701 | 21059329 |
|   | 2  | 21052674 | 21061173 | NM_001002781 | chr2  | 21057353 | 21057926 |
|   | 10 | 20990767 | 20999266 | AF087672     | chr10 | 20998428 | 20999076 |
|   | 5  | 20878497 | 20887026 | NM_008013    | chr5  | 20879065 | 20879680 |
|   | 11 | 20728561 | 20737070 | NM_173752    | chr11 | 20731291 | 20732088 |
|   | 18 | 20647284 | 20655813 | NM_030596    | chr18 | 20654161 | 20654735 |
|   | 15 | 20608967 | 20617475 | NM_022816    | chr15 | 20616217 | 20617069 |
|   | 16 | 20537394 | 20545952 | NM_139293    | chr16 | 20537352 | 20538033 |
|   | 3  | 20431728 | 20440231 | NM_007753    | chr3  | 20436399 | 20437013 |
|   | 17 | 20386205 | 20394704 | NM_134191    | chr17 | 20386894 | 20387731 |
| X |    | 20216463 | 20224962 | NM_001013387 | chrX  | 20218788 | 20219386 |
| X |    | 20116421 | 20124937 | NM_013840    | chrX  | 20118746 | 20119255 |
|   | 9  | 19956703 | 19965202 | NM_146903    | chr9  | 19959048 | 19959571 |
|   | 9  | 19956703 | 19965202 | NM_146903    | chr9  | 19957328 | 19957924 |
|   | 4  | 19929390 | 19938075 | NM_015767    | chr4  | 19935753 | 19936393 |
|   | 9  | 19919472 | 19927971 | NM_146904    | chr9  | 19921656 | 19922295 |
|   | 11 | 19916630 | 19925129 | BC030460     | chr11 | 19920579 | 19922011 |
|   | 11 | 19916630 | 19925129 | BC030460     | chr11 | 19917738 | 19918406 |
| X |    | 19839393 | 19848220 | NM_011049    | chrX  | 19844300 | 19845232 |
|   | 16 | 19536165 | 19544664 | NM_146958    | chr16 | 19541887 | 19542623 |
|   | 8  | 19445084 | 19453583 | NM_153108    | chr8  | 19446000 | 19446455 |
|   | 8  | 19445084 | 19453583 | NM_153108    | chr8  | 19445078 | 19445667 |
|   | 16 | 19426698 | 19435197 | NM_146935    | chr16 | 19431609 | 19432469 |
|   | 16 | 19319142 | 19327641 | NM_146466    | chr16 | 19324580 | 19325158 |
|   | 16 | 19319142 | 19327641 | NM_146466    | chr16 | 19319374 | 19320019 |
|   | 7  | 19295111 | 19303610 | NM_207547    | chr7  | 19298827 | 19299724 |
|   | 7  | 19295111 | 19303610 | NM_207547    | chr7  | 19296201 | 19297827 |
|   | 8  | 19233893 | 19250068 | NM_001025351 | chr8  | 19247394 | 19248114 |
|   | 9  | 19185317 | 19193816 | NM_146527    | chr9  | 19188070 | 19188533 |
|   | 1  | 19082234 | 19090735 | NM_153154    | chr1  | 19090337 | 19090718 |
|   | 13 | 18949836 | 18958335 | NM_175007    | chr13 | 18953093 | 18953688 |
|   | 9  | 18865359 | 18873858 | NM_146564    | chr9  | 18870348 | 18871217 |
|   | 9  | 18689052 | 18697551 | NM_001011824 | chr9  | 18692126 | 18692991 |
|   | 16 | 18684410 | 18693037 | NM_013805    | chr16 | 18691238 | 18691936 |
|   | 14 | 18611995 | 18620519 | NM_026528    | chr14 | 18614864 | 18615474 |
|   | 2  | 18584191 | 18597657 | NM_007552    | chr2  | 18584547 | 18585214 |
|   | 3  | 18240476 | 18249355 | NM_021560    | chr3  | 18244582 | 18245473 |
|   | 9  | 18036669 | 18045180 | NM_025844    | chr9  | 18042292 | 18042911 |
|   | 7  | 17977611 | 17986129 | NM_007677    | chr7  | 17981376 | 17981722 |
|   | 10 | 17739420 | 17747919 | NM_009048    | chr10 | 17743272 | 17743696 |
|   | 7  | 17723328 | 17731827 | NM_001037168 | chr7  | 17726975 | 17728028 |
|   | 6  | 17581015 | 17589601 | NM_007604    | chr6  | 17587083 | 17587709 |
|   | 17 | 17528806 | 17538181 | NM_029205    | chr17 | 17530852 | 17531607 |
|   | 7  | 17510898 | 17519397 | NM_011963    | chr7  | 17516260 | 17518325 |
|   | 7  | 17510898 | 17519397 | NM_011963    | chr7  | 17511783 | 17512898 |

|   |    |          |          |              |       |          |          |
|---|----|----------|----------|--------------|-------|----------|----------|
|   | 13 | 17474555 | 17483068 | NM_025479    | chr13 | 17479726 | 17480431 |
|   | 13 | 17477382 | 17485881 | NM_138654    | chr13 | 17479726 | 17480431 |
|   | 17 | 17326565 | 17335259 | NM_172827    | chr17 | 17329109 | 17329833 |
|   | 7  | 17218449 | 17227012 | NM_026087    | chr7  | 17226021 | 17226810 |
|   | 7  | 17218449 | 17227012 | NM_026087    | chr7  | 17221145 | 17221732 |
|   | 7  | 17162411 | 17170923 | NM_027210    | chr7  | 17170094 | 17170769 |
|   | 7  | 17162411 | 17170923 | NM_027210    | chr7  | 17165058 | 17166264 |
|   | 7  | 17124646 | 17133200 | NM_023289    | chr7  | 17128438 | 17129076 |
|   | 7  | 17124646 | 17133200 | NM_023289    | chr7  | 17127395 | 17128016 |
|   | 1  | 17080513 | 17089103 | NM_020604    | chr1  | 17082576 | 17083213 |
|   | 17 | 17073190 | 17081708 | NM_025934    | chr17 | 17078689 | 17079302 |
|   | 7  | 16965204 | 16973773 | NM_025957    | chr7  | 16971441 | 16972021 |
|   | 16 | 16773610 | 16788813 | NM_016982    | chr16 | 16784986 | 16785831 |
|   | 16 | 16778454 | 16793916 | NM_011624    | chr16 | 16784986 | 16785831 |
|   | 12 | 16612730 | 16621250 | NM_172950    | chr12 | 16618857 | 16619931 |
|   | 11 | 16533611 | 16551541 | NM_024475    | chr11 | 16543058 | 16543752 |
|   | 11 | 16533611 | 16551541 | NM_024475    | chr11 | 16542175 | 16542818 |
| X |    | 16473763 | 16482292 | NM_028916    | chrX  | 16475223 | 16475820 |
|   | 7  | 16183893 | 16192407 | NM_011155    | chr7  | 16185995 | 16186606 |
|   | 16 | 16120923 | 16129422 | NM_026163    | chr16 | 16128460 | 16129092 |
| X |    | 16066224 | 16074723 | NM_010883    | chrX  | 16066828 | 16067822 |
|   | 4  | 15938525 | 15947024 | NM_145950    | chr4  | 15941501 | 15942056 |
|   | 7  | 15933868 | 15942864 | NM_009201    | chr7  | 15939542 | 15940414 |
|   | 7  | 15874451 | 15882950 | NM_011927    | chr7  | 15874335 | 15875008 |
|   | 4  | 15802411 | 15810987 | NM_009788    | chr4  | 15808737 | 15809284 |
| X |    | 15770657 | 15779286 | NM_173740    | chrX  | 15777676 | 15778336 |
|   | 9  | 15360050 | 15368549 | NM_181816    | chr9  | 15360069 | 15360825 |
|   | 7  | 15123475 | 15132057 | NM_153068    | chr7  | 15129886 | 15130503 |
|   | 17 | 15077800 | 15086550 | NM_007865    | chr17 | 15084961 | 15085884 |
|   | 2  | 14961149 | 14975615 | NM_029466    | chr2  | 14973379 | 14973963 |
|   | 2  | 14964535 | 14978638 | NM_028950    | chr2  | 14973379 | 14973963 |
|   | 8  | 14905694 | 14914193 | NM_172751    | chr8  | 14907605 | 14908369 |
|   | 6  | 14702747 | 14711246 | NM_080464    | chr6  | 14706321 | 14706857 |
|   | 17 | 14673760 | 14682356 | NM_026451    | chr17 | 14679652 | 14680433 |
|   | 17 | 14677201 | 14685700 | NM_175173    | chr17 | 14679652 | 14680433 |
|   | 1  | 14287285 | 14301413 | NM_010164    | chr1  | 14294511 | 14295233 |
|   | 16 | 14228411 | 14236910 | NM_025345    | chr16 | 14230455 | 14231065 |
|   | 9  | 14128890 | 14137639 | NM_028013    | chr9  | 14130885 | 14132024 |
|   | 8  | 14084440 | 14098565 | NM_172910    | chr8  | 14093920 | 14094441 |
|   | 8  | 14087779 | 14096278 | NM_001034862 | chr8  | 14093920 | 14094441 |
|   | 5  | 14025282 | 14034150 | NM_011348    | chr5  | 14025439 | 14026022 |
|   | 18 | 13985079 | 13993578 | NM_181326    | chr18 | 13985618 | 13986564 |
|   | 19 | 13829326 | 13837825 | NM_146344    | chr19 | 13835201 | 13836451 |
|   | 19 | 13810127 | 13818626 | NM_146990    | chr19 | 13816106 | 13816806 |
|   | 19 | 13715465 | 13723964 | NM_001011832 | chr19 | 13721317 | 13722580 |
|   | 19 | 13694132 | 13702631 | NM_146635    | chr19 | 13699873 | 13700760 |
|   | 13 | 13592183 | 13600682 | U37527       | chr13 | 13600084 | 13600653 |

|          |    |          |                       |             |          |          |
|----------|----|----------|-----------------------|-------------|----------|----------|
|          | 6  | 13555483 | 13564063 NM_028990    | chr6        | 13563278 | 13563917 |
|          | 19 | 13531991 | 13540490 NM_001011842 | chr19       | 13537733 | 13539206 |
|          | 19 | 13519035 | 13527534 NM_146690    | chr19       | 13526422 | 13527869 |
|          | 19 | 13471590 | 13480089 NM_146695    | chr19       | 13476158 | 13477213 |
|          | 3  | 13448214 | 13456713 NM_178631    | chr3        | 13452770 | 13453450 |
|          | 19 | 13425649 | 13434148 NM_146691    | chr19       | 13430380 | 13431313 |
|          | 19 | 13425649 | 13434148 NM_146691    | chr19       | 13429020 | 13429604 |
|          | 19 | 13402779 | 13411278 NM_146694    | chr19       | 13410745 | 13411248 |
|          | 7  | 13336178 | 13352766 NM_175250    | chr7        | 13347362 | 13348275 |
|          | 19 | 13251688 | 13260187 NM_146693    | chr19       | 13258511 | 13259109 |
|          | 13 | 13223817 | 13232316 NM_010917    | chr13       | 13228182 | 13228751 |
|          | 19 | 13211177 | 13219676 NM_146689    | chr19       | 13215654 | 13216357 |
|          | 19 | 13211177 | 13219676 NM_146689    | chr19       | 13210092 | 13211228 |
|          | 17 | 13141000 | 13149499 BC061173     | chr17       | 13146589 | 13149375 |
|          | 17 | 13141000 | 13149499 BC061173     | chr17       | 13145022 | 13146387 |
|          | 17 | 13141000 | 13149499 BC061173     | chr17       | 13142755 | 13144147 |
|          | 17 | 13141000 | 13149499 BC061173     | chr17       | 13141577 | 13142547 |
|          | 19 | 13124432 | 13132931 NM_146692    | chr19       | 13128535 | 13129346 |
|          | 19 | 13124432 | 13132931 NM_146692    | chr19       | 13127328 | 13127983 |
|          | 19 | 13092847 | 13101346 NM_146700    | chr19       | 13094518 | 13095288 |
|          | 19 | 13060007 | 13068506 NM_146705    | chr19       | 13066275 | 13067136 |
|          | 19 | 13014610 | 13023109 NM_146371    | chr19       | 13018525 | 13019215 |
|          | 19 | 12966381 | 12974880 NM_146703    | chr19       | 12967972 | 12968681 |
|          | 19 | 12857212 | 12868161 NM_134152    | chr19       | 12863467 | 12864089 |
|          | 19 | 12860642 | 12869141 NM_053009    | chr19       | 12863467 | 12864089 |
|          | 10 | 12774986 | 12783606 NM_009538    | chr10       | 12782115 | 12782611 |
|          | 10 | 12774986 | 12783606 NM_009538    | chr10       | 12779865 | 12781050 |
|          | 19 | 12661133 | 12669632 NM_001013762 | chr19       | 12667617 | 12668319 |
|          | 17 | 12610523 | 12619022 NM_010515    | chr17       | 12613196 | 12613786 |
|          | 17 | 12578760 | 12587259 BC009123     | chr17       | 12585425 | 12586715 |
|          | 17 | 12578760 | 12587259 BC009123     | chr17       | 12584311 | 12585045 |
|          | 17 | 12516552 | 12525196 NM_009202    | chr17       | 12522175 | 12522953 |
|          | 19 | 12483356 | 12497481 NM_019540    | chr19       | 12491918 | 12492738 |
|          | 8  | 12379743 | 12388242 NM_001013812 | chr8        | 12380616 | 12381313 |
|          | 7  | 12292311 | 12300873 NM_013877    | chr7        | 12295424 | 12296099 |
| X        |    | 12222457 | 12230995 NM_009481    | chrX        | 12228090 | 12228686 |
| Y_random |    | 12127745 | 12137642 BC100413     | chrY_random | 12136072 | 12136523 |
| Y_random |    | 12127745 | 12137642 BC100413     | chrY_random | 12135013 | 12135984 |
| Y_random |    | 12127745 | 12137642 BC100413     | chrY_random | 12133088 | 12133871 |
| Y_random |    | 12127745 | 12137642 BC100413     | chrY_random | 12127743 | 12128398 |
| Y_random |    | 12059277 | 12069118 BC100414     | chrY_random | 12064694 | 12065858 |
|          | 11 | 11925475 | 11933974 BC016111     | chr11       | 11927876 | 11929229 |
|          | 11 | 11925475 | 11933974 BC016111     | chr11       | 11925493 | 11926300 |
| X        |    | 11916431 | 11925032 NM_001048208 | chrX        | 11919354 | 11920370 |
|          | 7  | 11860043 | 11868542 NM_178732    | chr7        | 11861403 | 11862030 |
|          | 16 | 11820482 | 11829023 NM_146067    | chr16       | 11820827 | 11821914 |
|          | 7  | 11729240 | 11737739 NM_022981    | chr7        | 11736725 | 11737620 |

|          |    |          |          |              |             |          |          |
|----------|----|----------|----------|--------------|-------------|----------|----------|
|          | 8  | 11676215 | 11684722 | NM_024271    | chr8        | 11684211 | 11685478 |
|          | 8  | 11676215 | 11684722 | NM_024271    | chr8        | 11682058 | 11682661 |
|          | 8  | 11633162 | 11641726 | NM_133971    | chr8        | 11634503 | 11635070 |
|          | 11 | 11579928 | 11592868 | NM_001025597 | chr11       | 11587232 | 11588219 |
| Y_random |    | 11349402 | 11359374 | NM_023546    | chrY_random | 11350627 | 11352069 |
|          | 8  | 11306996 | 11315495 | NM_009932    | chr8        | 11313547 | 11314285 |
|          | 8  | 11310162 | 11318702 | NM_009931    | chr8        | 11313547 | 11314285 |
| Y_random |    | 11275195 | 11283694 | NM_001017394 | chrY_random | 11282196 | 11282729 |
| Y_random |    | 11275195 | 11283694 | NM_001017394 | chrY_random | 11280797 | 11281690 |
| Y_random |    | 11275195 | 11283694 | NM_001017394 | chrY_random | 11277135 | 11277748 |
| Y_random |    | 11275195 | 11283694 | NM_001017394 | chrY_random | 11275350 | 11275951 |
|          | 7  | 11266129 | 11274628 | NM_134233    | chr7        | 11267984 | 11268778 |
| X        |    | 11234328 | 11243013 | NM_175045    | chrX        | 11234324 | 11235249 |
|          | 7  | 11204666 | 11213168 | NM_134234    | chr7        | 11210616 | 11211218 |
|          | 4  | 11077588 | 11086087 | NM_021897    | chr4        | 11077996 | 11078624 |
|          | 12 | 10923772 | 10932304 | BC108372     | chr12       | 10929800 | 10930391 |
|          | 7  | 10780207 | 10788706 | NM_134207    | chr7        | 10786535 | 10787266 |
|          | 7  | 10780207 | 10788706 | NM_134207    | chr7        | 10784995 | 10785745 |
|          | 10 | 10768647 | 10778546 | NM_016976    | chr10       | 10769604 | 10770672 |
|          | 7  | 10746639 | 10755138 | NM_134206    | chr7        | 10750234 | 10750906 |
|          | 18 | 10719623 | 10728623 | NM_144860    | chr18       | 10725881 | 10726888 |
|          | 14 | 10341279 | 10349778 | NM_008981    | chr14       | 10347070 | 10347657 |
|          | 3  | 10309043 | 10324188 | NM_001010834 | chr3        | 10312725 | 10313313 |
|          | 19 | 10260234 | 10275657 | BC024923     | chr19       | 10271451 | 10272107 |
|          | 19 | 10265646 | 10276988 | NM_007999    | chr19       | 10271451 | 10272107 |
|          | 16 | 10077806 | 10086377 | NM_026594    | chr16       | 10084700 | 10085728 |
|          | 2  | 9793130  | 9801629  | NM_008091    | chr2        | 9793983  | 9794590  |
| X        |    | 9730352  | 9738851  | BC026516     | chrX        | 9732922  | 9733846  |
|          | 7  | 9621932  | 9630431  | NM_145848    | chr7        | 9621859  | 9622642  |
|          | 1  | 9580481  | 9589218  | NM_178399    | chr1        | 9585671  | 9586451  |
|          | 17 | 9510532  | 9519053  | NM_026226    | chr17       | 9510854  | 9511400  |
|          | 7  | 9453881  | 9462380  | NM_145842    | chr7        | 9459415  | 9460253  |
|          | 7  | 9453881  | 9462380  | NM_145842    | chr7        | 9454683  | 9455499  |
| X        |    | 9403318  | 9411825  | NM_008769    | chrX        | 9408177  | 9409098  |
|          | 11 | 9195290  | 9203789  | AY160971     | chr11       | 9199443  | 9200099  |
|          | 7  | 9147598  | 9156244  | NM_134230    | chr7        | 9152569  | 9153306  |
|          | 7  | 9147598  | 9156244  | NM_134230    | chr7        | 9149165  | 9149769  |
|          | 19 | 9014883  | 9023440  | NM_197993    | chr19       | 9020410  | 9021108  |
|          | 5  | 8893723  | 8902222  | NM_008830    | chr5        | 8897233  | 8897875  |
|          | 19 | 8881317  | 8889826  | DQ000354     | chr19       | 8886326  | 8886940  |
|          | 19 | 8883470  | 8892339  | NM_027412    | chr19       | 8886326  | 8886940  |
| X        |    | 8817370  | 8825942  | NM_025975    | chrX        | 8819137  | 8819963  |
|          | 12 | 8718099  | 8726598  | BC041773     | chr12       | 8719635  | 8720248  |
|          | 12 | 8694429  | 8703188  | NM_030723    | chr12       | 8696710  | 8697391  |
|          | 15 | 8653524  | 8663945  | NM_148938    | chr15       | 8654660  | 8655198  |
|          | 12 | 8622575  | 8631074  | NM_177802    | chr12       | 8623713  | 8624870  |
| X        |    | 8423763  | 8432372  | NM_023500    | chrX        | 8429028  | 8429970  |

|   |    |         |         |              |       |         |         |
|---|----|---------|---------|--------------|-------|---------|---------|
| X |    | 8214049 | 8222548 | NM_001038697 | chrX  | 8218264 | 8220816 |
| X |    | 8214049 | 8222548 | NM_001038697 | chrX  | 8216089 | 8216847 |
|   | 19 | 8196528 | 8205027 | NM_001013820 | chr19 | 8200597 | 8201519 |
|   | 19 | 8196528 | 8205027 | NM_001013820 | chr19 | 8196936 | 8197637 |
| X |    | 8184444 | 8192951 | NM_031261    | chrX  | 8192011 | 8192651 |
| X |    | 8184444 | 8192951 | NM_031261    | chrX  | 8190489 | 8191572 |
|   | 17 | 8172580 | 8181079 | NM_178774    | chr17 | 8180101 | 8180969 |
| X |    | 8141132 | 8149631 | BC104363     | chrX  | 8142482 | 8143798 |
| X |    | 8141132 | 8149631 | BC104363     | chrX  | 8141700 | 8142359 |
| X |    | 7954650 | 7963149 | NM_199319    | chrX  | 7962264 | 7962853 |
| X |    | 7954650 | 7963149 | NM_199319    | chrX  | 7960963 | 7961823 |
| X |    | 7954650 | 7963149 | NM_199319    | chrX  | 7959699 | 7960158 |
| X |    | 7954650 | 7963149 | NM_199319    | chrX  | 7957356 | 7959125 |
|   | 7  | 7953991 | 7962519 | BC071238     | chr7  | 7955741 | 7956424 |
|   | 17 | 7758194 | 7766693 | NM_145968    | chr17 | 7758222 | 7758839 |
|   | 9  | 7686101 | 7694621 | NM_010810    | chr9  | 7686123 | 7686740 |
|   | 3  | 7593910 | 7602500 | NM_008371    | chr3  | 7595260 | 7595861 |
| X |    | 7564264 | 7575343 | NM_026492    | chrX  | 7572767 | 7574723 |
| X |    | 7564264 | 7575343 | NM_026492    | chrX  | 7569568 | 7571298 |
|   | 3  | 7414409 | 7422908 | M63554       | chr3  | 7416417 | 7416776 |
| X |    | 7406736 | 7415365 | NM_133991    | chrX  | 7414066 | 7414662 |
| X |    | 7406736 | 7415365 | NM_133991    | chrX  | 7409035 | 7409730 |
| X |    | 7347340 | 7356471 | NM_007898    | chrX  | 7354326 | 7354935 |
| X |    | 7347340 | 7356471 | NM_007898    | chrX  | 7349534 | 7350274 |
| X |    | 7122275 | 7130835 | NM_008089    | chrX  | 7122792 | 7123380 |
| X |    | 7082983 | 7091566 | NM_181548    | chrX  | 7087196 | 7088087 |
| X |    | 7050357 | 7058874 | NM_011591    | chrX  | 7055372 | 7056158 |
| X |    | 7029265 | 7043783 | NM_145737    | chrX  | 7040271 | 7041051 |
|   | 11 | 6957492 | 6965991 | NM_009622    | chr11 | 6962747 | 6963354 |
| X |    | 6940954 | 6949453 | NM_207670    | chrX  | 6946329 | 6946927 |
|   | 14 | 6866246 | 6874763 | NM_025938    | chr14 | 6866563 | 6867285 |
| X |    | 6530286 | 6538785 | NM_019461    | chrX  | 6531225 | 6532347 |
|   | 19 | 6511177 | 6519676 | BC060272     | chr19 | 6511916 | 6512505 |
|   | 15 | 6358021 | 6366520 | BC006588     | chr15 | 6358459 | 6359042 |
|   | 7  | 6328669 | 6337326 | NM_021323    | chr7  | 6334469 | 6335477 |
|   | 7  | 6331991 | 6340505 | NM_008817    | chr7  | 6334469 | 6335477 |
|   | 7  | 6328669 | 6337326 | NM_021323    | chr7  | 6332739 | 6333653 |
|   | 7  | 6331991 | 6340505 | NM_008817    | chr7  | 6332739 | 6333653 |
|   | 11 | 6309869 | 6318372 | NM_008907    | chr11 | 6312399 | 6313085 |
|   | 19 | 6233132 | 6241840 | NM_198168    | chr19 | 6241058 | 6241864 |
|   | 19 | 6235668 | 6244226 | NM_194348    | chr19 | 6241058 | 6241864 |
| X |    | 6218474 | 6227701 | NM_001042542 | chrX  | 6226757 | 6227382 |
| X |    | 6218474 | 6227701 | NM_001042542 | chrX  | 6224562 | 6225534 |
| X |    | 6196079 | 6204578 | NM_183015    | chrX  | 6198325 | 6199015 |
|   | 7  | 6058596 | 6067095 | NM_146915    | chr7  | 6062057 | 6062622 |
|   | 11 | 5963054 | 5971751 | NM_007595    | chr11 | 5965923 | 5966553 |
|   | 11 | 5812628 | 5821127 | BC011139     | chr11 | 5814247 | 5815005 |

|   |    |         |                      |       |         |         |
|---|----|---------|----------------------|-------|---------|---------|
|   | 5  | 5787092 | 5795628 BC006722     | chr5  | 5793717 | 5794390 |
|   | 5  | 5787092 | 5795628 BC006722     | chr5  | 5788804 | 5789752 |
|   | 2  | 5756306 | 5765064 NM_016918    | chr2  | 5756416 | 5757127 |
|   | 11 | 5735293 | 5743799 NM_017401    | chr11 | 5739825 | 5740461 |
|   | 7  | 5662802 | 5671301 NM_031389    | chr7  | 5669426 | 5670373 |
|   | 7  | 5662802 | 5671301 NM_031389    | chr7  | 5663655 | 5664430 |
|   | 19 | 5659136 | 5669651 NM_011379    | chr19 | 5663602 | 5664283 |
|   | 7  | 5642248 | 5650747 AY596194     | chr7  | 5647458 | 5648105 |
|   | 7  | 5642248 | 5650747 AY596194     | chr7  | 5646027 | 5646601 |
|   | 7  | 5642248 | 5650747 AY596194     | chr7  | 5644854 | 5645771 |
|   | 2  | 5629437 | 5637936 NM_177343    | chr2  | 5634533 | 5635238 |
|   | 7  | 5611598 | 5620097 NM_030738    | chr7  | 5611607 | 5612245 |
|   | 19 | 5555052 | 5570573 NM_001033448 | chr19 | 5567848 | 5568485 |
|   | 19 | 5555052 | 5570573 NM_001033448 | chr19 | 5559592 | 5560431 |
|   | 19 | 5558058 | 5566646 NM_019935    | chr19 | 5559592 | 5560431 |
|   | 7  | 5404933 | 5414532 NM_030742    | chr7  | 5409828 | 5411049 |
|   | 7  | 5404933 | 5414532 NM_030742    | chr7  | 5406052 | 5406721 |
|   | 17 | 5394226 | 5402741 NM_027457    | chr17 | 5402091 | 5402700 |
| X |    | 5216983 | 5225736 NM_021431    | chrX  | 5223267 | 5225472 |
|   | 19 | 5142652 | 5151151 BC034670     | chr19 | 5150528 | 5151125 |
|   | 19 | 5142652 | 5151151 BC034670     | chr19 | 5148258 | 5149516 |
|   | 16 | 5045232 | 5053802 NM_008909    | chr16 | 5051103 | 5051746 |
|   | 18 | 4914565 | 4923064 NM_178046    | chr18 | 4916070 | 4916957 |
|   | 12 | 4780043 | 4788971 NM_028376    | chr12 | 4785610 | 4786701 |
|   | 12 | 4783568 | 4792253 NM_175431    | chr12 | 4785610 | 4786701 |
|   | 19 | 4750525 | 4759119 NM_025717    | chr19 | 4756517 | 4757311 |
|   | 10 | 4750255 | 4758882 NM_026793    | chr10 | 4750777 | 4751765 |
|   | 6  | 4691306 | 4699879 NM_130877    | chr6  | 4697830 | 4698884 |
|   | 6  | 4694538 | 4703100 NM_011360    | chr6  | 4697830 | 4698884 |
|   | 7  | 4507016 | 4531430 NM_173008    | chr7  | 4521885 | 4522526 |
| X |    | 4509172 | 4517671 BC117727     | chrX  | 4514350 | 4515856 |
| X |    | 4509172 | 4517671 BC117727     | chrX  | 4512973 | 4514259 |
|   | 19 | 4474644 | 4483143 NM_134164    | chr19 | 4476289 | 4477366 |
|   | 10 | 4418141 | 4426712 NM_019958    | chr10 | 4425038 | 4425758 |
|   | 9  | 4303833 | 4316194 NM_026962    | chr9  | 4309482 | 4310438 |
|   | 9  | 4306955 | 4315469 NM_026276    | chr9  | 4309482 | 4310438 |
|   | 19 | 4280549 | 4289137 NM_026720    | chr19 | 4282907 | 4283659 |
|   | 11 | 4130423 | 4139335 NM_001013365 | chr11 | 4137395 | 4138493 |
|   | 4  | 4063087 | 4071592 NM_001002927 | chr4  | 4066294 | 4067441 |
|   | 19 | 4035413 | 4048221 NM_013541    | chr19 | 4045626 | 4046067 |
|   | 16 | 3946329 | 3955084 NM_010061    | chr16 | 3946681 | 3947270 |
|   | 12 | 3885758 | 3894257 NM_153743    | chr12 | 3887232 | 3887835 |
|   | 8  | 3746431 | 3754984 NM_133238    | chr8  | 3752540 | 3754656 |
|   | 11 | 3544467 | 3562794 BC057363     | chr11 | 3544493 | 3545296 |
|   | 3  | 3487753 | 3496358 NM_013920    | chr3  | 3489676 | 3490337 |
|   | 9  | 3329478 | 3340944 NM_026303    | chr9  | 3335332 | 3336132 |
|   | 6  | 3322919 | 3333268 BC031151     | chr6  | 3325686 | 3326504 |

|           |    |         |                      |              |         |         |
|-----------|----|---------|----------------------|--------------|---------|---------|
|           | 6  | 3322919 | 3333268 BC031151     | chr6         | 3324484 | 3325612 |
| X         |    | 3241098 | 3249629 BC089532     | chrX         | 3246258 | 3247428 |
| X         |    | 3241098 | 3249629 BC089532     | chrX         | 3241473 | 3244008 |
|           | 11 | 3090915 | 3099463 BC046305     | chr11        | 3097688 | 3098373 |
|           | 11 | 3096395 | 3105264 NM_023743    | chr11        | 3097688 | 3098373 |
|           | 11 | 3090915 | 3099463 BC046305     | chr11        | 3095386 | 3097086 |
|           | 11 | 3096395 | 3105264 NM_023743    | chr11        | 3095386 | 3097086 |
|           | 11 | 3090915 | 3099463 BC046305     | chr11        | 3092387 | 3094310 |
|           | 11 | 3090915 | 3099463 BC046305     | chr11        | 3091179 | 3091778 |
|           | 17 | 3065454 | 3074309 BC075621     | chr17        | 3070910 | 3071497 |
|           | 11 | 3042349 | 3050848 BC048950     | chr11        | 3049477 | 3050422 |
|           | 11 | 3042349 | 3050848 BC048950     | chr11        | 3048067 | 3048872 |
|           | 11 | 3042349 | 3050848 BC048950     | chr11        | 3041657 | 3044660 |
|           | 11 | 3018018 | 3032526 NM_001004146 | chr11        | 3027491 | 3032464 |
|           | 11 | 3018018 | 3032526 NM_001004146 | chr11        | 3025310 | 3026930 |
|           | 5  | 3004565 | 3013064 NM_134232    | chr5         | 3006037 | 3006641 |
| Y         |    | 1946029 | 1954528 NM_011564    | chrY         | 1951815 | 1952535 |
| Y         |    | 1946029 | 1954528 NM_011564    | chrY         | 1949290 | 1950041 |
| Un_random |    | 1499370 | 1512168 NM_030175    | chrUn_random | 1511175 | 1511760 |
| Y_random  |    | 1402748 | 1411247 NM_001037748 | chrY_random  | 1408505 | 1409670 |
| Y_random  |    | 1402748 | 1411247 NM_001037748 | chrY_random  | 1403934 | 1404590 |

| gene overlap percent | region overlap percent | length(bps) | probes in region | p-value(region) |            |
|----------------------|------------------------|-------------|------------------|-----------------|------------|
| 0.0551156            |                        | 1           | 682              | 12              | 0.0402977  |
| 0.0662072            |                        | 1           | 951              | 21              | 0.025132   |
| 0.036936             |                        | 1           | 623              | 17              | 0.0475539  |
| 0.0743656            |                        | 1           | 633              | 16              | 0.0370668  |
| 0.0800886            |                        | 1           | 687              | 18              | 0.043864   |
| 0.124221             |                        | 1           | 1914             | 53              | 0.00659416 |
| 0.08223              |                        | 1           | 1267             | 29              | 0.0361222  |
| 0.0508178            |                        | 1           | 783              | 21              | 0.0301372  |
| 0.102514             |                        | 1           | 938              | 27              | 0.0249643  |
| 0.0437648            |                        | 1           | 684              | 12              | 0.0481718  |
| 0.0987154            |                        | 1           | 876              | 25              | 0.0476951  |
| 0.0717478            |                        | 1           | 610              | 14              | 0.0414717  |
| 0.105765             |                        | 1           | 899              | 25              | 0.0496637  |
| 0.0862271            |                        | 1           | 735              | 17              | 0.0304197  |
| 0.0860475            |                        | 1           | 782              | 22              | 0.0322558  |
| 0.0917625            |                        | 1           | 782              | 22              | 0.0322558  |
| 0.0907816            |                        | 1           | 777              | 22              | 0.0378348  |
| 0.0721746            |                        | 1           | 615              | 10              | 0.0360781  |
| 0.0894477            |                        | 1           | 779              | 13              | 0.0156159  |
| 0.0634975            |                        | 1           | 553              | 13              | 0.0358751  |
| 0.08141              |                        | 1           | 709              | 21              | 0.0443142  |
| 0.0929048            |                        | 1           | 821              | 21              | 0.0349923  |
| 0.0927835            |                        | 1           | 810              | 23              | 0.0331562  |
| 0.0702353            |                        | 1           | 597              | 15              | 0.0343214  |
| 0.0580769            |                        | 1           | 874              | 19              | 0.0444025  |
| 0.00376028           | 0.04426                |             | 723              | 20              | 0.0275507  |
| 0.0850588            |                        | 1           | 723              | 20              | 0.0275507  |
| 0.0461527            |                        | 1           | 601              | 18              | 0.0449321  |
| 0.0784706            |                        | 1           | 667              | 19              | 0.0358398  |
| 0.0694118            |                        | 1           | 590              | 15              | 0.0465917  |
| 0.0378625            |                        | 1           | 598              | 12              | 0.0399887  |
| 0.0364184            |                        | 1           | 617              | 12              | 0.0445172  |
| 0.0715294            |                        | 1           | 608              | 15              | 0.0390265  |
| 0.0862353            |                        | 1           | 733              | 21              | 0.0467947  |
| 0.0697647            |                        | 1           | 593              | 13              | 0.038744   |
| 0.102471             |                        | 1           | 871              | 16              | 0.0493371  |
| 0.0490716            |                        | 1           | 666              | 19              | 0.0452587  |
| 0.0432239            |                        | 1           | 702              | 20              | 0.0372963  |
| 0.105647             |                        | 1           | 898              | 25              | 0.0351777  |
| 0.0764906            |                        | 1           | 653              | 18              | 0.034701   |
| 0.0862536            |                        | 1           | 955              | 26              | 0.0311877  |
| 0.135385             |                        | 1           | 1157             | 30              | 0.00971028 |
| 0.0267612            |                        | 1           | 604              | 17              | 0.0291838  |
| 0.0944438            |                        | 1           | 804              | 23              | 0.0319645  |



|           |          |      |    |            |
|-----------|----------|------|----|------------|
| 0.0870994 | 1        | 742  | 21 | 0.0237637  |
| 0.0840317 | 1        | 742  | 21 | 0.0237637  |
| 0.0593885 | 1        | 507  | 15 | 0.0333592  |
| 0.0807475 | 1        | 687  | 17 | 0.0490369  |
| 0.202163  | 1        | 1720 | 46 | 0.00512879 |
| 0.07      | 1        | 595  | 13 | 0.0475539  |
| 0.0885882 | 1        | 753  | 21 | 0.022775   |
| 0.0772941 | 1        | 657  | 19 | 0.0366254  |
| 0.0734278 | 1        | 627  | 18 | 0.0346392  |
| 0.0736002 | 1        | 627  | 18 | 0.0346392  |
| 0.0679566 | 1        | 583  | 15 | 0.0498932  |
| 0.0672941 | 1        | 572  | 13 | 0.0457884  |
| 0.432941  | 1        | 3680 | 92 | 0.00343391 |
| 0.0794118 | 1        | 675  | 18 | 0.0244611  |
| 0.0771765 | 1        | 656  | 16 | 0.04156    |
| 0.107529  | 1        | 1004 | 28 | 0.0375964  |
| 0.0886794 | 1        | 828  | 23 | 0.0422309  |
| 0.0917688 | 1        | 786  | 21 | 0.0484102  |
| 0.009603  | 0.118326 | 693  | 14 | 0.0479511  |
| 0.0705563 | 1        | 728  | 20 | 0.0291397  |
| 0.0733411 | 1        | 630  | 18 | 0.0397768  |
| 0.0774113 | 1        | 744  | 18 | 0.0420985  |
| 0.077167  | 1        | 657  | 18 | 0.0255204  |
| 0.0804706 | 1        | 684  | 19 | 0.035213   |
| 0.0845882 | 1        | 719  | 18 | 0.0474921  |
| 0.0721176 | 1        | 613  | 15 | 0.0445084  |
| 0.101179  | 1        | 867  | 24 | 0.017196   |
| 0.0738302 | 1        | 628  | 18 | 0.0363076  |
| 0.106631  | 1        | 907  | 25 | 0.0454     |
| 0.059375  | 1        | 608  | 17 | 0.0348599  |
| 0.0679986 | 1        | 582  | 11 | 0.0481542  |
| 0.0942998 | 1        | 804  | 23 | 0.0332445  |
| 0.0765211 | 1        | 659  | 12 | 0.0361399  |
| 0.0945261 | 1        | 1435 | 34 | 0.0136474  |
| 0.0624465 | 1        | 948  | 18 | 0.0262089  |
| 0.0889458 | 1        | 799  | 22 | 0.0460356  |
| 0.0706882 | 1        | 607  | 13 | 0.0490457  |
| 0.0294288 | 1        | 710  | 20 | 0.0353807  |
| 0.103404  | 1        | 881  | 25 | 0.0264208  |
| 0.0719484 | 1        | 613  | 17 | 0.0479688  |
| 0.0426704 | 1        | 1038 | 28 | 0.0217687  |
| 0.104941  | 1        | 892  | 21 | 0.0340566  |
| 0.0756471 | 1        | 643  | 18 | 0.0392825  |
| 0.0921435 | 1        | 1079 | 27 | 0.0190057  |
| 0.0854118 | 1        | 726  | 20 | 0.0485955  |
| 0.0712692 | 1        | 607  | 16 | 0.047395   |
| 0.0709029 | 1        | 607  | 16 | 0.047395   |

|           |          |      |    |            |
|-----------|----------|------|----|------------|
| 0.106983  | 1        | 1097 | 28 | 0.0167546  |
| 0.0698136 | 1        | 633  | 14 | 0.0391501  |
| 0.077113  | 1        | 656  | 17 | 0.0469007  |
| 0.072     | 1        | 612  | 15 | 0.0472538  |
| 0.0735294 | 0.952744 | 656  | 14 | 0.0171166  |
| 0.0771765 | 1        | 656  | 14 | 0.0171166  |
| 0.0509864 | 1        | 597  | 17 | 0.0331032  |
| 0.100906  | 1        | 858  | 23 | 0.0244434  |
| 0.152064  | 1        | 1293 | 35 | 0.0178934  |
| 0.118471  | 1        | 1007 | 28 | 0.0225543  |
| 0.0450734 | 1        | 387  | 11 | 0.037773   |
| 0.0975221 | 1        | 1161 | 32 | 0.0331562  |
| 0.0625131 | 1        | 596  | 17 | 0.0426987  |
| 0.0899937 | 1        | 858  | 24 | 0.0254586  |
| 0.0540225 | 1        | 787  | 20 | 0.0249025  |
| 0.053542  | 1        | 780  | 22 | 0.0355661  |
| 0.0704283 | 1        | 1026 | 24 | 0.0235165  |
| 0.124623  | 1        | 1158 | 32 | 0.0179552  |
| 0.150129  | 1        | 1395 | 39 | 0.0107343  |
| 0.0657555 | 1        | 611  | 17 | 0.0441023  |
| 0.0456626 | 1        | 389  | 11 | 0.045144   |
| 0.0854118 | 1        | 726  | 20 | 0.0362547  |
| 0.0782353 | 1        | 665  | 19 | 0.0410833  |
| 0.124706  | 1        | 1060 | 30 | 0.0334387  |
| 0.1497    | 1        | 1422 | 40 | 0.047854   |
| 0.0756121 | 1        | 772  | 22 | 0.0381879  |
| 0.109109  | 1        | 1114 | 24 | 0.0279391  |
| 0.0608235 | 1        | 517  | 15 | 0.0475804  |
| 0.0638824 | 1        | 543  | 16 | 0.0497431  |
| 0.116618  | 1        | 1080 | 30 | 0.0332621  |
| 0.107176  | 1        | 911  | 25 | 0.0301372  |
| 0.0978654 | 1        | 839  | 17 | 0.0388146  |
| 0.131647  | 1        | 1119 | 30 | 0.00572024 |
| 0.0854213 | 1        | 733  | 18 | 0.0377377  |
| 0.126367  | 1        | 1121 | 31 | 0.0368373  |
| 0.066095  | 1        | 632  | 18 | 0.0388323  |
| 0.205447  | 1        | 1750 | 47 | 0.0097809  |
| 0.157901  | 1        | 1345 | 31 | 0.0110521  |
| 0.0722    | 1        | 615  | 18 | 0.0459473  |
| 0.0376238 | 1        | 627  | 18 | 0.0204799  |
| 0.0737647 | 1        | 627  | 18 | 0.0204799  |
| 0.072457  | 1        | 619  | 17 | 0.0475098  |
| 0.072     | 1        | 612  | 15 | 0.0219099  |
| 0.0703553 | 1        | 604  | 17 | 0.0401564  |
| 0.0856168 | 1        | 728  | 21 | 0.0189439  |
| 0.100588  | 1        | 855  | 22 | 0.0048728  |
| 0.0567059 | 1        | 482  | 14 | 0.0137356  |

|           |          |      |    |            |
|-----------|----------|------|----|------------|
| 0.127412  | 1        | 1083 | 23 | 0.00510231 |
| 0.0855294 | 1        | 727  | 19 | 0.0388411  |
| 0.353647  | 1        | 3006 | 82 | 0.00646175 |
| 0.106     | 1        | 901  | 25 | 0.0242316  |
| 0.0916569 | 1        | 780  | 19 | 0.0245758  |
| 0.0542353 | 1        | 461  | 13 | 0.00741512 |
| 0.455059  | 1        | 3868 | 97 | 0.00643527 |
| 0.0765122 | 1        | 659  | 19 | 0.0402977  |
| 0.0429477 | 1        | 718  | 20 | 0.0207005  |
| 0.104     | 1        | 884  | 25 | 0.0172578  |
| 0.129412  | 1        | 1100 | 28 | 0.0127469  |
| 0.0537647 | 1        | 457  | 13 | 0.0260412  |
| 0.105176  | 1        | 894  | 23 | 0.0230134  |
| 0.084     | 1        | 714  | 13 | 0.0367137  |
| 0.405882  | 1        | 3450 | 89 | 0.00915415 |
| 0.0684706 | 1        | 582  | 11 | 0.0451616  |
| 0.106941  | 1        | 909  | 21 | 0.0136827  |
| 0.106     | 1        | 901  | 26 | 0.0197384  |
| 0.207882  | 1        | 1767 | 43 | 0.0111933  |
| 0.0935294 | 1        | 795  | 20 | 0.012182   |
| 0.0901832 | 1        | 768  | 21 | 0.0140976  |
| 0.0386366 | 0.935028 | 354  | 10 | 0.0461856  |
| 0.169954  | 1        | 1456 | 34 | 0.00899525 |
| 0.197385  | 1        | 1691 | 42 | 0.00496107 |
| 0.102603  | 1        | 879  | 20 | 0.0150244  |
| 0.0675849 | 1        | 579  | 13 | 0.0237814  |
| 0.0894385 | 1        | 763  | 20 | 0.0455059  |
| 0.103294  | 1        | 878  | 20 | 0.0111845  |
| 0.311882  | 1        | 2651 | 63 | 0.00878339 |
| 0.300471  | 1        | 2554 | 61 | 0.00575555 |
| 0.0888235 | 1        | 755  | 19 | 0.00915415 |
| 0.478471  | 1        | 4067 | 91 | 0.00646175 |
| 0.0711765 | 1        | 605  | 17 | 0.0422839  |
| 0.101446  | 1        | 1277 | 36 | 0.011926   |
| 0.0953289 | 1        | 1200 | 27 | 0.0134708  |
| 0.136797  | 1        | 1722 | 44 | 0.0137092  |
| 0.101529  | 1        | 863  | 16 | 0.00914532 |
| 0.223529  | 1        | 1900 | 36 | 0.0166399  |
| 0.135882  | 1        | 1155 | 26 | 0.0183171  |
| 0.0904706 | 1        | 769  | 22 | 0.0282481  |
| 0.0772941 | 1        | 657  | 19 | 0.0355573  |
| 0.127529  | 1        | 1084 | 28 | 0.0156335  |
| 0.0690381 | 1        | 590  | 16 | 0.0384968  |
| 0.113412  | 1        | 964  | 23 | 0.013921   |
| 0.126824  | 1        | 1078 | 27 | 0.0353454  |
| 0.0729412 | 1        | 620  | 18 | 0.0415512  |
| 0.124118  | 1        | 1055 | 24 | 0.011211   |

|           |          |      |     |            |
|-----------|----------|------|-----|------------|
| 0.0711632 | 1        | 613  | 16  | 0.0489133  |
| 0.0831205 | 1        | 716  | 19  | 0.0220688  |
| 0.310471  | 1        | 2639 | 61  | 0.0190939  |
| 0.123059  | 1        | 1046 | 27  | 0.0107608  |
| 0.280941  | 1        | 2388 | 60  | 0.0134178  |
| 0.0671765 | 1        | 571  | 14  | 0.0223601  |
| 0.086543  | 1        | 737  | 18  | 0.0359457  |
| 0.0906422 | 1        | 772  | 21  | 0.0389559  |
| 0.118824  | 1        | 1010 | 24  | 0.0373581  |
| 0.108941  | 1        | 926  | 21  | 0.00694727 |
| 0.0746055 | 1        | 676  | 12  | 0.0154394  |
| 0.203271  | 0.539117 | 3988 | 104 | 0.0263325  |
| 0.401834  | 1        | 3594 | 93  | 0.00287777 |
| 0.10423   | 1        | 892  | 25  | 0.0440141  |
| 0.0485898 | 1        | 777  | 22  | 0.0294575  |
| 0.0836471 | 1        | 711  | 20  | 0.0483042  |
| 0.131412  | 1        | 1117 | 26  | 0.0127116  |
| 0.0762195 | 1        | 650  | 11  | 0.0328119  |
| 0.121145  | 1        | 1100 | 30  | 0.0112639  |
| 0.0781069 | 1        | 741  | 16  | 0.0385498  |
| 0.0860427 | 1        | 741  | 16  | 0.0385498  |
| 0.0809412 | 1        | 688  | 20  | 0.0464593  |
| 0.0348285 | 1        | 587  | 15  | 0.0488162  |
| 0.181531  | 1        | 1549 | 43  | 0.00892463 |
| 0.0741176 | 1        | 630  | 18  | 0.0472184  |
| 0.0835294 | 1        | 710  | 20  | 0.0306139  |
| 0.0922353 | 1        | 784  | 22  | 0.0279038  |
| 0.0691765 | 1        | 588  | 17  | 0.0324235  |
| 0.0742353 | 1        | 631  | 18  | 0.0454618  |
| 0.0742353 | 1        | 631  | 18  | 0.0396179  |
| 0.0703529 | 1        | 598  | 12  | 0.0442789  |
| 0.0695294 | 1        | 591  | 17  | 0.0411363  |
| 0.0750821 | 1        | 640  | 13  | 0.0348599  |
| 0.0751262 | 1        | 640  | 13  | 0.0348599  |
| 0.127288  | 1        | 1085 | 26  | 0.0245582  |
| 0.127362  | 1        | 1085 | 26  | 0.0245582  |
| 0.072     | 1        | 612  | 16  | 0.047598   |
| 0.0722647 | 1        | 642  | 17  | 0.0403418  |
| 0.108533  | 1        | 926  | 20  | 0.0240197  |
| 0.0711765 | 1        | 605  | 16  | 0.0476951  |
| 0.118471  | 1        | 1007 | 28  | 0.0256351  |
| 0.0866855 | 1        | 737  | 21  | 0.0457884  |
| 0.129138  | 1        | 1100 | 30  | 0.013921   |
| 0.0897135 | 0.694545 | 1100 | 30  | 0.013921   |
| 0.0770588 | 1        | 655  | 18  | 0.0448174  |
| 0.0932636 | 1        | 803  | 21  | 0.00833319 |
| 0.0620613 | 1        | 778  | 21  | 0.0389824  |

|           |          |      |    |            |
|-----------|----------|------|----|------------|
| 0.0405354 | 1        | 636  | 14 | 0.0356367  |
| 0.0748235 | 1        | 636  | 14 | 0.0356367  |
| 0.0770588 | 1        | 655  | 19 | 0.0359633  |
| 0.0575294 | 1        | 489  | 14 | 0.0258647  |
| 0.0975094 | 1        | 830  | 19 | 0.0474833  |
| 0.123968  | 1        | 1096 | 26 | 0.0246376  |
| 0.0695294 | 1        | 591  | 10 | 0.0459031  |
| 0.0674612 | 1        | 600  | 17 | 0.0441553  |
| 0.0709412 | 1        | 603  | 13 | 0.0389294  |
| 0.0395514 | 1        | 589  | 17 | 0.0332533  |
| 0.185781  | 0.993715 | 1591 | 38 | 0.0195088  |
| 0.0715868 | 1        | 614  | 12 | 0.0478275  |
| 0.0827059 | 1        | 703  | 20 | 0.0320263  |
| 0.14      | 1        | 1190 | 31 | 0.0213714  |
| 0.0665027 | 1        | 568  | 16 | 0.0470507  |
| 0.0557379 | 1        | 883  | 25 | 0.0245229  |
| 0.103059  | 1        | 876  | 24 | 0.0492399  |
| 0.114941  | 1        | 977  | 18 | 0.0152981  |
| 0.0890379 | 1        | 757  | 19 | 0.0387617  |
| 0.0718824 | 1        | 611  | 12 | 0.0337741  |
| 0.113294  | 1        | 963  | 21 | 0.00844794 |
| 0.0869412 | 1        | 739  | 20 | 0.0342067  |
| 0.108995  | 1        | 933  | 23 | 0.037826   |
| 0.110514  | 1        | 946  | 27 | 0.0183083  |
| 0.0875294 | 1        | 744  | 17 | 0.038541   |
| 0.0902892 | 1        | 768  | 21 | 0.0386999  |
| 0.0700262 | 1        | 856  | 20 | 0.0241786  |
| 0.209647  | 1        | 1782 | 49 | 0.0375611  |
| 0.212748  | 1        | 1809 | 43 | 0.00692078 |
| 0.105059  | 1        | 893  | 25 | 0.0232429  |
| 0.0671413 | 1        | 877  | 23 | 0.00569376 |
| 0.0703529 | 1        | 598  | 10 | 0.0488251  |
| 0.0372865 | 1        | 609  | 17 | 0.0286188  |
| 0.0450009 | 1        | 735  | 20 | 0.0470154  |
| 0.0524112 | 1        | 726  | 19 | 0.0381614  |
| 0.0736564 | 1        | 640  | 16 | 0.0360958  |
| 0.126235  | 1        | 1073 | 29 | 0.0378966  |
| 0.0736471 | 1        | 626  | 15 | 0.0495754  |
| 0.0348803 | 1        | 590  | 16 | 0.0445437  |
| 0.26048   | 1        | 2268 | 54 | 0.0138857  |
| 0.109765  | 1        | 933  | 26 | 0.0388411  |
| 0.111882  | 1        | 951  | 25 | 0.0307992  |
| 0.132     | 1        | 1122 | 26 | 0.0179022  |
| 0.118958  | 1        | 1014 | 28 | 0.0483484  |
| 0.0328478 | 1        | 548  | 16 | 0.0232252  |
| 0.0371082 | 1        | 599  | 17 | 0.0468035  |
| 0.04961   | 1        | 636  | 18 | 0.0382055  |

|           |   |      |    |            |
|-----------|---|------|----|------------|
| 0.146353  | 1 | 1244 | 34 | 0.0133737  |
| 0.0712941 | 1 | 606  | 15 | 0.00863332 |
| 0.0809702 | 1 | 691  | 20 | 0.0322293  |
| 0.0581176 | 1 | 494  | 10 | 0.037976   |
| 0.0771765 | 1 | 656  | 18 | 0.0410745  |
| 0.0702924 | 1 | 601  | 17 | 0.049496   |
| 0.0405454 | 1 | 681  | 19 | 0.048622   |
| 0.0614118 | 1 | 522  | 15 | 0.0459031  |
| 0.0458433 | 1 | 729  | 21 | 0.0413217  |
| 0.0353415 | 1 | 562  | 16 | 0.0379407  |
| 0.0581326 | 1 | 777  | 22 | 0.0483042  |
| 0.0800539 | 1 | 1070 | 30 | 0.0205858  |
| 0.0712153 | 1 | 620  | 17 | 0.0364224  |
| 0.118539  | 1 | 1032 | 23 | 0.0328649  |
| 0.0921204 | 1 | 802  | 22 | 0.0403418  |
| 0.0838824 | 1 | 713  | 20 | 0.049443   |
| 0.0725882 | 1 | 617  | 17 | 0.0450204  |
| 0.115313  | 1 | 994  | 28 | 0.0257322  |
| 0.0325761 | 1 | 641  | 18 | 0.0329532  |
| 0.0399959 | 1 | 787  | 23 | 0.0497343  |
| 0.0773616 | 1 | 665  | 19 | 0.0477834  |
| 0.0216243 | 1 | 561  | 15 | 0.0411716  |
| 0.0747059 | 1 | 635  | 18 | 0.0189174  |
| 0.0657647 | 1 | 559  | 11 | 0.037208   |
| 0.0460714 | 1 | 791  | 17 | 0.0332798  |
| 0.0755315 | 1 | 643  | 18 | 0.0487103  |
| 0.0556045 | 1 | 821  | 17 | 0.0316555  |
| 0.0722454 | 1 | 676  | 19 | 0.0363959  |
| 0.060359  | 1 | 622  | 16 | 0.0470066  |
| 0.13199   | 1 | 1140 | 26 | 0.00914532 |
| 0.0638501 | 1 | 668  | 14 | 0.0247612  |
| 0.0705882 | 1 | 600  | 13 | 0.04683    |
| 0.0446276 | 1 | 655  | 19 | 0.049902   |
| 0.137826  | 1 | 1182 | 33 | 0.0388941  |
| 0.0684706 | 1 | 582  | 17 | 0.0494695  |
| 0.0621278 | 1 | 532  | 13 | 0.0470154  |
| 0.106981  | 1 | 921  | 21 | 0.00885401 |
| 0.0455931 | 1 | 389  | 10 | 0.0448968  |
| 0.0361469 | 1 | 376  | 11 | 0.0428665  |
| 0.146911  | 1 | 1253 | 33 | 0.0253968  |
| 0.0817647 | 1 | 695  | 20 | 0.0442259  |
| 0.138308  | 1 | 1177 | 25 | 0.00901291 |
| 0.137629  | 1 | 1177 | 25 | 0.00901291 |
| 0.131647  | 1 | 1119 | 29 | 0.04156    |
| 0.0570588 | 1 | 485  | 14 | 0.0273918  |
| 0.122988  | 1 | 1047 | 24 | 0.0262354  |
| 0.0430968 | 1 | 722  | 19 | 0.0348511  |

|           |          |      |    |            |
|-----------|----------|------|----|------------|
| 0.0905278 | 1        | 777  | 18 | 0.0373581  |
| 0.0918071 | 1        | 790  | 20 | 0.0358398  |
| 0.0891765 | 1        | 758  | 19 | 0.0258117  |
| 0.0644706 | 1        | 548  | 14 | 0.0476775  |
| 0.188235  | 1        | 1600 | 33 | 0.018529   |
| 0.128018  | 1        | 1108 | 30 | 0.0340301  |
| 0.105765  | 1        | 899  | 22 | 0.0369785  |
| 0.0892941 | 1        | 759  | 15 | 0.0496548  |
| 0.0737647 | 1        | 627  | 18 | 0.0426105  |
| 0.138235  | 0.991561 | 1185 | 28 | 0.00863332 |
| 0.0717925 | 1        | 620  | 13 | 0.0488162  |
| 0.0817508 | 1        | 706  | 20 | 0.0475009  |
| 0.0601135 | 1        | 625  | 13 | 0.0453558  |
| 0.108118  | 1        | 919  | 24 | 0.0364665  |
| 0.0795294 | 1        | 676  | 19 | 0.0474744  |
| 0.165294  | 0.953836 | 1473 | 42 | 0.0120496  |
| 0.0984706 | 1        | 837  | 23 | 0.0380202  |
| 0.0715294 | 1        | 608  | 17 | 0.0479511  |
| 0.0908235 | 1        | 772  | 20 | 0.0353807  |
| 0.084     | 1        | 714  | 20 | 0.0434226  |
| 0.263647  | 1        | 2241 | 62 | 0.00651472 |
| 0.0736471 | 1        | 626  | 14 | 0.0460885  |
| 0.104941  | 1        | 892  | 24 | 0.0463887  |
| 0.0971765 | 1        | 826  | 23 | 0.0383644  |
| 0.231529  | 1        | 1968 | 55 | 0.0039106  |
| 0.0708235 | 1        | 602  | 17 | 0.048366   |
| 0.0716471 | 1        | 609  | 18 | 0.0480306  |
| 0.0697237 | 1        | 593  | 11 | 0.0414541  |
| 0.0347459 | 1        | 774  | 22 | 0.0176639  |
| 0.0706441 | 1        | 714  | 20 | 0.0379407  |
| 0.103024  | 1        | 896  | 25 | 0.0156424  |
| 0.100031  | 1        | 968  | 27 | 0.0298988  |
| 0.239519  | 0.773503 | 2755 | 77 | 0.00726506 |
| 0.284696  | 1        | 2755 | 77 | 0.00726506 |
| 0.094751  | 1        | 843  | 19 | 0.0157836  |
| 0.0871138 | 1        | 843  | 19 | 0.0157836  |
| 0.128941  | 1        | 1096 | 28 | 0.0243022  |
| 0.0391555 | 1        | 727  | 20 | 0.0364577  |
| 0.0413068 | 1        | 727  | 20 | 0.0364577  |
| 0.11693   | 1        | 998  | 27 | 0.0214156  |
| 0.138     | 1        | 1173 | 27 | 0.0240462  |
| 0.100818  | 1        | 912  | 26 | 0.0316467  |
| 0.118288  | 1        | 1009 | 23 | 0.00797126 |
| 0.075886  | 0.997368 | 1140 | 32 | 0.034701   |
| 0.0854142 | 1        | 732  | 21 | 0.0347098  |
| 0.0554224 | 1        | 601  | 17 | 0.0464946  |
| 0.0706228 | 1        | 601  | 17 | 0.0464946  |

|           |   |      |    |            |
|-----------|---|------|----|------------|
| 0.118471  | 1 | 1007 | 27 | 0.0258735  |
| 0.0769319 | 1 | 667  | 17 | 0.0335005  |
| 0.0723613 | 1 | 665  | 19 | 0.0373493  |
| 0.0501176 | 1 | 426  | 12 | 0.0376582  |
| 0.0629766 | 1 | 958  | 27 | 0.0317791  |
| 0.0931765 | 1 | 792  | 22 | 0.0376406  |
| 0.0524962 | 1 | 653  | 18 | 0.0353189  |
| 0.0698357 | 1 | 595  | 16 | 0.0483307  |
| 0.0432043 | 1 | 816  | 23 | 0.013921   |
| 0.0764426 | 1 | 722  | 16 | 0.0388853  |
| 0.0585106 | 1 | 858  | 20 | 0.0328119  |
| 0.068402  | 1 | 586  | 15 | 0.0495666  |
| 0.0726441 | 1 | 619  | 18 | 0.0417101  |
| 0.0825455 | 1 | 716  | 18 | 0.0340213  |
| 0.0939066 | 1 | 843  | 23 | 0.0234018  |
| 0.138044  | 1 | 1180 | 30 | 0.0310817  |
| 0.0711717 | 1 | 673  | 20 | 0.0295722  |
| 0.0692682 | 1 | 655  | 19 | 0.0338271  |
| 0.115186  | 1 | 980  | 26 | 0.0235342  |
| 0.0404363 | 1 | 456  | 13 | 0.0369432  |
| 0.0759508 | 1 | 649  | 18 | 0.0361134  |
| 0.109102  | 1 | 935  | 24 | 0.0182906  |
| 0.121647  | 1 | 1034 | 20 | 0.0330061  |
| 0.0955392 | 1 | 816  | 22 | 0.0377377  |
| 0.105765  | 1 | 899  | 25 | 0.0266503  |
| 0.106692  | 1 | 912  | 21 | 0.0245847  |
| 0.0982339 | 1 | 1207 | 28 | 0.0132325  |
| 0.0892    | 1 | 1096 | 29 | 0.0153422  |
| 0.136471  | 1 | 1160 | 33 | 0.0250878  |
| 0.0677647 | 1 | 576  | 11 | 0.0244258  |
| 0.258941  | 1 | 2201 | 54 | 0.0104341  |
| 0.161529  | 1 | 1373 | 36 | 0.00921594 |
| 0.0779541 | 1 | 663  | 19 | 0.0360516  |
| 0.0945882 | 1 | 804  | 17 | 0.0389294  |
| 0.0761547 | 1 | 648  | 18 | 0.0454176  |
| 0.1235    | 1 | 1070 | 30 | 0.0188115  |
| 0.0707059 | 1 | 601  | 14 | 0.0496637  |
| 0.113882  | 1 | 968  | 27 | 0.033933   |
| 0.138506  | 1 | 1187 | 33 | 0.0243816  |
| 0.0750292 | 1 | 643  | 14 | 0.0447291  |
| 0.0354979 | 1 | 586  | 17 | 0.0471831  |
| 0.0849144 | 1 | 734  | 20 | 0.0295016  |
| 0.0661864 | 1 | 588  | 17 | 0.0404566  |
| 0.0636915 | 1 | 588  | 17 | 0.0404566  |
| 0.0811285 | 1 | 693  | 20 | 0.0366695  |
| 0.123859  | 1 | 1058 | 30 | 0.0215303  |
| 0.0670803 | 1 | 573  | 16 | 0.0425575  |



|           |   |      |    |            |
|-----------|---|------|----|------------|
| 0.111215  | 1 | 950  | 26 | 0.0238255  |
| 0.0845286 | 1 | 719  | 21 | 0.0257322  |
| 0.0784706 | 1 | 667  | 15 | 0.0412334  |
| 0.078     | 1 | 663  | 14 | 0.0292279  |
| 0.150588  | 1 | 1280 | 36 | 0.0181847  |
| 0.0969364 | 1 | 829  | 16 | 0.0238873  |
| 0.0582353 | 1 | 495  | 14 | 0.0390265  |
| 0.0684614 | 1 | 590  | 15 | 0.0425045  |
| 0.0777634 | 1 | 662  | 19 | 0.0322558  |
| 0.0775539 | 1 | 662  | 19 | 0.0322558  |
| 0.0598862 | 1 | 958  | 26 | 0.0211331  |
| 0.0890822 | 1 | 758  | 21 | 0.0335005  |
| 0.0355088 | 1 | 858  | 24 | 0.0369167  |
| 0.0678265 | 1 | 577  | 10 | 0.0329178  |
| 0.0393066 | 1 | 678  | 19 | 0.0392472  |
| 0.0697647 | 1 | 593  | 17 | 0.0485955  |
| 0.0785882 | 1 | 668  | 19 | 0.0353454  |
| 0.0447301 | 1 | 668  | 19 | 0.0353454  |
| 0.0684706 | 1 | 582  | 10 | 0.0414011  |
| 0.063572  | 1 | 593  | 14 | 0.0488604  |
| 0.10581   | 1 | 987  | 26 | 0.0132148  |
| 0.0682693 | 1 | 585  | 12 | 0.0458414  |
| 0.0971765 | 1 | 826  | 23 | 0.0240992  |
| 0.0723529 | 1 | 615  | 13 | 0.0464505  |
| 0.142706  | 1 | 1213 | 31 | 0.0178934  |
| 0.116235  | 1 | 988  | 28 | 0.0361311  |
| 0.187399  | 1 | 1621 | 45 | 0.00580851 |
| 0.0865531 | 1 | 737  | 15 | 0.0213626  |
| 0.0376197 | 1 | 593  | 14 | 0.0471831  |
| 0.0876471 | 1 | 745  | 21 | 0.0245229  |
| 0.0987741 | 1 | 846  | 24 | 0.0472361  |
| 0.0695734 | 1 | 592  | 17 | 0.0476775  |
| 0.144252  | 1 | 1241 | 34 | 0.0231723  |
| 0.0496947 | 1 | 586  | 10 | 0.0440935  |
| 0.0782659 | 1 | 677  | 16 | 0.0337123  |
| 0.07      | 1 | 595  | 17 | 0.0436786  |
| 0.0727059 | 1 | 618  | 16 | 0.0214244  |
| 0.074     | 1 | 629  | 18 | 0.0423545  |
| 0.0589524 | 1 | 592  | 17 | 0.0488604  |
| 0.0686184 | 1 | 593  | 17 | 0.0488251  |
| 0.0448235 | 1 | 381  | 11 | 0.0472891  |
| 0.0696471 | 1 | 592  | 17 | 0.0451087  |
| 0.0675988 | 1 | 614  | 15 | 0.0459826  |
| 0.0709412 | 1 | 603  | 17 | 0.0448703  |
| 0.0893588 | 1 | 786  | 19 | 0.0364224  |
| 0.124375  | 1 | 1095 | 31 | 0.0474215  |
| 0.0896471 | 1 | 762  | 21 | 0.0140976  |

|           |   |      |    |            |
|-----------|---|------|----|------------|
| 0.109168  | 1 | 1130 | 26 | 0.0170813  |
| 0.0790894 | 1 | 674  | 16 | 0.0140358  |
| 0.0641868 | 1 | 547  | 12 | 0.0408714  |
| 0.0591972 | 1 | 615  | 17 | 0.0446496  |
| 0.0863026 | 1 | 746  | 21 | 0.0482336  |
| 0.141647  | 1 | 1204 | 27 | 0.037314   |
| 0.0723769 | 1 | 616  | 17 | 0.0431313  |
| 0.13      | 1 | 1105 | 29 | 0.0262001  |
| 0.0662594 | 1 | 564  | 13 | 0.0467153  |
| 0.127294  | 1 | 1082 | 26 | 0.0178581  |
| 0.0832941 | 1 | 708  | 17 | 0.0447291  |
| 0.0797647 | 1 | 678  | 19 | 0.0465122  |
| 0.0734118 | 1 | 624  | 18 | 0.0459561  |
| 0.109412  | 1 | 930  | 26 | 0.0215833  |
| 0.0510247 | 1 | 727  | 18 | 0.0377377  |
| 0.0759196 | 1 | 646  | 18 | 0.0438287  |
| 0.08      | 1 | 680  | 19 | 0.0486397  |
| 0.101647  | 1 | 864  | 24 | 0.037976   |
| 0.154471  | 1 | 1313 | 37 | 0.00986918 |
| 0.051739  | 1 | 601  | 16 | 0.0473244  |
| 0.0951656 | 1 | 813  | 19 | 0.0358486  |
| 0.114273  | 1 | 1020 | 26 | 0.0250702  |
| 0.0902591 | 1 | 770  | 20 | 0.0258823  |
| 0.0787059 | 1 | 669  | 18 | 0.0496107  |
| 0.0757647 | 1 | 644  | 17 | 0.0426811  |
| 0.114353  | 1 | 972  | 28 | 0.0494253  |
| 0.117633  | 1 | 1000 | 25 | 0.0189439  |
| 0.135647  | 1 | 1153 | 30 | 0.0134178  |
| 0.119529  | 1 | 1016 | 29 | 0.0389824  |
| 0.121294  | 1 | 1031 | 29 | 0.0168253  |
| 0.0698824 | 1 | 594  | 17 | 0.0448703  |
| 0.0654783 | 1 | 562  | 15 | 0.0446938  |
| 0.0715368 | 1 | 614  | 18 | 0.039565   |
| 0.103864  | 1 | 887  | 25 | 0.0240285  |
| 0.080445  | 1 | 687  | 19 | 0.0458943  |
| 0.135551  | 1 | 1153 | 26 | 0.0257058  |
| 0.0695652 | 1 | 592  | 17 | 0.0470684  |
| 0.0656386 | 1 | 664  | 19 | 0.0364665  |
| 0.0781176 | 1 | 664  | 19 | 0.0364665  |
| 0.0695294 | 1 | 591  | 17 | 0.044835   |
| 0.0716471 | 1 | 609  | 17 | 0.0486838  |
| 0.0785377 | 1 | 681  | 19 | 0.0361664  |
| 0.0724706 | 1 | 616  | 10 | 0.030711   |
| 0.135765  | 1 | 1154 | 30 | 0.0180435  |
| 0.0584403 | 1 | 619  | 17 | 0.0493635  |
| 0.0704706 | 1 | 599  | 15 | 0.0458678  |
| 0.0523529 | 1 | 445  | 13 | 0.0462209  |

|           |   |      |    |            |
|-----------|---|------|----|------------|
| 0.0709428 | 1 | 605  | 14 | 0.0436521  |
| 0.0674937 | 1 | 593  | 17 | 0.0479688  |
| 0.0699064 | 1 | 620  | 10 | 0.040792   |
| 0.0689412 | 1 | 586  | 17 | 0.0492046  |
| 0.0465882 | 1 | 396  | 10 | 0.0485426  |
| 0.0672107 | 1 | 593  | 13 | 0.0479953  |
| 0.0772941 | 1 | 657  | 19 | 0.0388146  |
| 0.0932941 | 1 | 793  | 22 | 0.0361487  |
| 0.0689412 | 1 | 586  | 17 | 0.0235872  |
| 0.109061  | 1 | 928  | 26 | 0.0378348  |
| 0.0609412 | 1 | 518  | 13 | 0.0295987  |
| 0.0686137 | 1 | 585  | 10 | 0.0406066  |
| 0.0448378 | 1 | 651  | 14 | 0.0469271  |
| 0.0626911 | 1 | 533  | 15 | 0.0389824  |
| 0.0866824 | 1 | 990  | 27 | 0.0243463  |
| 0.132124  | 1 | 1129 | 30 | 0.0249289  |
| 0.08      | 1 | 680  | 19 | 0.0475098  |
| 0.129529  | 1 | 1101 | 30 | 0.0132325  |
| 0.0817647 | 1 | 695  | 20 | 0.0258735  |
| 0.121765  | 1 | 1035 | 29 | 0.0264208  |
| 0.0932941 | 1 | 793  | 23 | 0.0387617  |
| 0.0737647 | 1 | 627  | 18 | 0.0470949  |
| 0.136353  | 1 | 1159 | 33 | 0.0160661  |
| 0.0996471 | 1 | 847  | 24 | 0.0389382  |
| 0.0623606 | 1 | 587  | 16 | 0.049646   |
| 0.0705882 | 1 | 600  | 17 | 0.0492753  |
| 0.060937  | 1 | 519  | 15 | 0.0481453  |
| 0.0801177 | 1 | 681  | 19 | 0.0402359  |
| 0.0935294 | 1 | 795  | 23 | 0.0179552  |
| 0.0531765 | 1 | 452  | 12 | 0.0488604  |
| 0.112824  | 1 | 959  | 27 | 0.0189527  |
| 0.0997647 | 1 | 848  | 24 | 0.0474038  |
| 0.117474  | 1 | 999  | 26 | 0.0254586  |
| 0.0527552 | 1 | 584  | 10 | 0.0438728  |
| 0.0706905 | 1 | 602  | 11 | 0.0302519  |
| 0.0406294 | 1 | 346  | 10 | 0.026818   |
| 0.130695  | 1 | 1113 | 20 | 0.00643527 |
| 0.136     | 1 | 1156 | 32 | 0.0236048  |
| 0.0789381 | 1 | 672  | 18 | 0.0419925  |
| 0.118     | 1 | 1003 | 28 | 0.0211331  |
| 0.0728235 | 1 | 619  | 18 | 0.0437492  |
| 0.0763492 | 1 | 962  | 27 | 0.00920711 |
| 0.0725882 | 1 | 617  | 13 | 0.0493017  |
| 0.0984358 | 1 | 837  | 20 | 0.0428135  |
| 0.122472  | 1 | 1290 | 35 | 0.0287777  |
| 0.112805  | 1 | 962  | 21 | 0.0183789  |
| 0.0615017 | 1 | 670  | 19 | 0.047448   |

|           |   |      |    |            |
|-----------|---|------|----|------------|
| 0.0917485 | 1 | 785  | 21 | 0.0320263  |
| 0.0494821 | 1 | 621  | 18 | 0.0291926  |
| 0.0700575 | 1 | 646  | 16 | 0.0387175  |
| 0.0815294 | 1 | 693  | 19 | 0.0105842  |
| 0.0949412 | 1 | 807  | 21 | 0.0349217  |
| 0.0805189 | 1 | 689  | 19 | 0.0350365  |
| 0.101765  | 1 | 865  | 24 | 0.0338094  |
| 0.234235  | 1 | 1991 | 56 | 0.0104871  |
| 0.0512164 | 1 | 640  | 13 | 0.0454176  |
| 0.0708235 | 1 | 602  | 11 | 0.0471655  |
| 0.0823141 | 1 | 1373 | 38 | 0.0371992  |
| 0.0777647 | 1 | 661  | 18 | 0.0333945  |
| 0.135294  | 1 | 1150 | 32 | 0.00840381 |
| 0.0708754 | 1 | 604  | 17 | 0.0479158  |
| 0.0963529 | 1 | 819  | 23 | 0.0258029  |
| 0.0921605 | 1 | 790  | 22 | 0.0261118  |
| 0.0705882 | 1 | 600  | 14 | 0.0498579  |
| 0.0836471 | 1 | 711  | 20 | 0.0469007  |
| 0.205294  | 1 | 1745 | 48 | 0.0174432  |
| 0.136941  | 1 | 1164 | 32 | 0.0219629  |
| 0.0877647 | 1 | 746  | 21 | 0.0242845  |
| 0.104235  | 1 | 886  | 25 | 0.0252114  |
| 0.0874118 | 1 | 743  | 21 | 0.0356191  |
| 0.118365  | 1 | 1008 | 28 | 0.0233047  |
| 0.0475343 | 1 | 961  | 27 | 0.0120761  |
| 0.134588  | 1 | 1144 | 32 | 0.0166046  |
| 0.115882  | 1 | 985  | 28 | 0.0343921  |
| 0.0401752 | 1 | 587  | 16 | 0.0381438  |
| 0.0654695 | 1 | 587  | 16 | 0.0381438  |
| 0.0679111 | 1 | 593  | 17 | 0.0499903  |
| 0.07      | 1 | 595  | 17 | 0.0494695  |
| 0.0741176 | 1 | 630  | 18 | 0.0389294  |
| 0.0255146 | 1 | 414  | 12 | 0.0362017  |
| 0.0839898 | 1 | 725  | 20 | 0.0400328  |
| 0.0883529 | 1 | 751  | 21 | 0.0476598  |
| 0.069618  | 1 | 596  | 17 | 0.0497166  |
| 0.0150815 | 1 | 940  | 26 | 0.0222277  |
| 0.138837  | 1 | 1184 | 29 | 0.00569376 |
| 0.139098  | 1 | 1184 | 29 | 0.00569376 |
| 0.0104608 | 1 | 652  | 18 | 0.0355043  |
| 0.0103645 | 1 | 646  | 18 | 0.0454     |
| 0.0778823 | 1 | 662  | 14 | 0.0459385  |
| 0.0688476 | 1 | 644  | 18 | 0.0472273  |
| 0.118235  | 1 | 1005 | 25 | 0.0488251  |
| 0.0716471 | 1 | 609  | 16 | 0.0339772  |
| 0.0743529 | 1 | 632  | 18 | 0.0354867  |
| 0.0505357 | 1 | 632  | 18 | 0.0369079  |

|           |   |      |    |           |
|-----------|---|------|----|-----------|
| 0.0701176 | 1 | 596  | 17 | 0.0452941 |
| 0.0348781 | 1 | 648  | 18 | 0.0427076 |
| 0.0742353 | 1 | 631  | 15 | 0.0384792 |
| 0.07      | 1 | 595  | 17 | 0.0471478 |
| 0.0736103 | 1 | 629  | 18 | 0.044835  |
| 0.0737397 | 1 | 629  | 18 | 0.044835  |
| 0.0655609 | 1 | 585  | 12 | 0.0209654 |
| 0.0791765 | 1 | 673  | 18 | 0.031682  |
| 0.0657029 | 1 | 559  | 16 | 0.0394149 |
| 0.0987059 | 1 | 839  | 23 | 0.0360428 |
| 0.0886225 | 1 | 754  | 17 | 0.018732  |
| 0.0412481 | 1 | 1010 | 28 | 0.0356191 |
| 0.0287511 | 1 | 704  | 19 | 0.043758  |
| 0.0989625 | 1 | 868  | 24 | 0.0380202 |
| 0.101735  | 1 | 868  | 24 | 0.0380202 |
| 0.0721176 | 1 | 613  | 17 | 0.0479953 |
| 0.0714453 | 1 | 610  | 17 | 0.0467682 |
| 0.0923945 | 1 | 786  | 21 | 0.0356367 |
| 0.0765882 | 1 | 651  | 18 | 0.0436521 |
| 0.0834118 | 1 | 709  | 19 | 0.0242139 |
| 0.0434177 | 1 | 717  | 21 | 0.0377112 |
| 0.0969412 | 1 | 824  | 23 | 0.0304197 |
| 0.0767059 | 1 | 652  | 18 | 0.0435374 |
| 0.103765  | 1 | 882  | 25 | 0.0270211 |
| 0.0723499 | 1 | 617  | 17 | 0.0433343 |
| 0.0653009 | 1 | 612  | 14 | 0.0461238 |
| 0.0708235 | 1 | 602  | 17 | 0.0470949 |
| 0.121647  | 1 | 1034 | 27 | 0.0263325 |
| 0.193647  | 1 | 1646 | 46 | 0.0237284 |
| 0.0730819 | 1 | 622  | 18 | 0.0307639 |
| 0.0978824 | 1 | 832  | 23 | 0.0369079 |
| 0.0714118 | 1 | 607  | 17 | 0.0470684 |
| 0.0824706 | 1 | 701  | 20 | 0.0331562 |
| 0.0668235 | 1 | 568  | 15 | 0.0488692 |
| 0.104824  | 1 | 891  | 25 | 0.0307198 |
| 0.0689332 | 1 | 588  | 12 | 0.0485426 |
| 0.101529  | 1 | 863  | 23 | 0.0434314 |
| 0.102074  | 1 | 871  | 23 | 0.0259618 |
| 0.0698465 | 1 | 596  | 17 | 0.0429459 |
| 0.113294  | 1 | 963  | 27 | 0.0196589 |
| 0.0839873 | 1 | 717  | 20 | 0.0443407 |
| 0.0771765 | 1 | 656  | 15 | 0.034445  |
| 0.0716471 | 1 | 609  | 17 | 0.0436521 |
| 0.101242  | 1 | 864  | 19 | 0.0458149 |
| 0.0827059 | 1 | 703  | 20 | 0.0307021 |
| 0.100706  | 1 | 856  | 24 | 0.0310023 |
| 0.0995294 | 1 | 846  | 24 | 0.0224749 |

|            |           |      |    |            |
|------------|-----------|------|----|------------|
| 0.0942353  | 1         | 801  | 23 | 0.0346392  |
| 0.0916471  | 1         | 779  | 22 | 0.0299871  |
| 0.0829412  | 1         | 705  | 19 | 0.0385057  |
| 0.0730588  | 1         | 621  | 18 | 0.0217775  |
| 0.105529   | 1         | 897  | 19 | 0.0476069  |
| 0.111882   | 1         | 951  | 27 | 0.0259     |
| 0.0714118  | 1         | 607  | 17 | 0.0451263  |
| 0.0898824  | 1         | 764  | 19 | 0.0360869  |
| 0.118334   | 1         | 1043 | 28 | 0.0318674  |
| 0.0805055  | 1         | 688  | 19 | 0.0400858  |
| 0.0580507  | 1         | 866  | 25 | 0.0365018  |
| 0.0764395  | 1         | 912  | 15 | 0.0201532  |
| 0.112706   | 1         | 958  | 27 | 0.0187762  |
| 0.0965015  | 1         | 822  | 20 | 0.013718   |
| 0.0692161  | 1         | 619  | 16 | 0.0323264  |
| 0.0883373  | 1         | 790  | 19 | 0.0444819  |
| 0.0942353  | 1         | 801  | 21 | 0.00923359 |
| 0.069557   | 1         | 592  | 16 | 0.031938   |
| 0.0742353  | 1         | 631  | 11 | 0.0471831  |
| 0.0914564  | 1         | 790  | 22 | 0.0392472  |
| 0.125527   | 1         | 1071 | 24 | 0.025794   |
| 0.103412   | 1         | 879  | 21 | 0.047854   |
| 0.240301   | 1         | 2044 | 50 | 0.0189439  |
| 0.022601   | 1         | 590  | 15 | 0.0444731  |
| 0.0667799  | 1         | 590  | 15 | 0.0444731  |
| 0.0728702  | 1         | 621  | 18 | 0.0402888  |
| 0.102465   | 1         | 873  | 25 | 0.0377377  |
| 0.0959258  | 1         | 817  | 23 | 0.0315408  |
| 0.0882353  | 1         | 750  | 21 | 0.043299   |
| 0.0969412  | 1         | 824  | 23 | 0.0388764  |
| 0.0705937  | 1         | 604  | 16 | 0.037976   |
| 0.00293979 | 0.0413907 | 604  | 16 | 0.037976   |
| 0.0866971  | 1         | 741  | 21 | 0.035213   |
| 0.0406153  | 1         | 631  | 18 | 0.0416924  |
| 0.0710588  | 1         | 604  | 17 | 0.0482248  |
| 0.0723529  | 1         | 615  | 10 | 0.0497078  |
| 0.0585882  | 1         | 498  | 14 | 0.0355926  |
| 0.0894978  | 1         | 761  | 21 | 0.0475362  |
| 0.0708235  | 1         | 602  | 15 | 0.047854   |
| 0.101529   | 1         | 863  | 22 | 0.0414276  |
| 0.0579052  | 1         | 497  | 14 | 0.0491605  |
| 0.0725674  | 1         | 619  | 16 | 0.0428841  |
| 0.0723993  | 1         | 618  | 12 | 0.0472008  |
| 0.0533164  | 1         | 713  | 16 | 0.0297753  |
| 0.0804478  | 1         | 697  | 20 | 0.0294045  |
| 0.0703529  | 1         | 598  | 17 | 0.048984   |
| 0.0949918  | 1         | 808  | 21 | 0.0479776  |

|           |   |      |    |           |
|-----------|---|------|----|-----------|
| 0.0707736 | 1 | 602  | 16 | 0.0351777 |
| 0.0478391 | 1 | 735  | 20 | 0.039565  |
| 0.135412  | 1 | 1151 | 32 | 0.0260942 |
| 0.0804706 | 1 | 684  | 19 | 0.0348599 |
| 0.10194   | 1 | 867  | 20 | 0.0374287 |
| 0.0818824 | 1 | 696  | 18 | 0.0308257 |
| 0.0780717 | 1 | 664  | 19 | 0.040845  |
| 0.044251  | 1 | 732  | 21 | 0.0256616 |
| 0.0912941 | 1 | 776  | 22 | 0.0260765 |
| 0.0982936 | 1 | 841  | 22 | 0.0324941 |
| 0.132714  | 1 | 1129 | 27 | 0.0363165 |
| 0.115882  | 1 | 985  | 25 | 0.0338889 |
| 0.11275   | 1 | 1070 | 30 | 0.0389294 |
| 0.0734118 | 1 | 624  | 18 | 0.0452499 |
| 0.0809534 | 1 | 720  | 20 | 0.0441023 |
| 0.127052  | 1 | 1130 | 30 | 0.0177345 |
| 0.0715294 | 1 | 608  | 15 | 0.0493989 |
| 0.0762353 | 1 | 648  | 18 | 0.0344362 |
| 0.0524648 | 1 | 447  | 11 | 0.0486044 |
| 0.114034  | 1 | 971  | 24 | 0.0233223 |
| 0.0901091 | 1 | 768  | 17 | 0.0262531 |
| 0.0747718 | 1 | 647  | 18 | 0.0351159 |
| 0.0723145 | 1 | 618  | 11 | 0.0485955 |
| 0.0831765 | 1 | 707  | 20 | 0.0426811 |
| 0.0945882 | 1 | 804  | 22 | 0.0249731 |
| 0.257394  | 1 | 2228 | 60 | 0.0346745 |
| 0.0715294 | 1 | 608  | 17 | 0.0411363 |
| 0.0633909 | 1 | 547  | 11 | 0.0486838 |
| 0.0722767 | 1 | 627  | 11 | 0.0336417 |
| 0.0918749 | 1 | 787  | 22 | 0.0247789 |
| 0.0960065 | 1 | 827  | 15 | 0.0341449 |
| 0.0365146 | 1 | 585  | 13 | 0.0453558 |
| 0.103183  | 1 | 924  | 25 | 0.0377024 |
| 0.0530588 | 1 | 451  | 13 | 0.0419925 |
| 0.104079  | 1 | 888  | 18 | 0.0183259 |
| 0.101529  | 1 | 863  | 24 | 0.0396621 |
| 0.102672  | 1 | 876  | 25 | 0.0261736 |
| 0.0897936 | 1 | 783  | 21 | 0.0438375 |
| 0.0757647 | 1 | 644  | 16 | 0.0316555 |
| 0.0754363 | 1 | 644  | 16 | 0.0316555 |
| 0.141816  | 1 | 1206 | 28 | 0.0180346 |
| 0.0702041 | 1 | 602  | 12 | 0.0485161 |
| 0.0732424 | 1 | 623  | 18 | 0.0354867 |
| 0.0742353 | 1 | 631  | 17 | 0.0486838 |
| 0.114235  | 1 | 971  | 27 | 0.0263943 |
| 0.109817  | 1 | 971  | 27 | 0.0263943 |
| 0.0472914 | 1 | 708  | 20 | 0.0429459 |

|           |          |      |    |           |
|-----------|----------|------|----|-----------|
| 0.0408122 | 1        | 611  | 17 | 0.0487456 |
| 0.0769321 | 1        | 656  | 15 | 0.0432549 |
| 0.103156  | 1        | 912  | 26 | 0.0387175 |
| 0.0803949 | 1        | 684  | 14 | 0.0302255 |
| 0.0898824 | 1        | 764  | 21 | 0.0457884 |
| 0.210235  | 1        | 1787 | 47 | 0.0108755 |
| 0.0685084 | 1        | 615  | 15 | 0.0485955 |
| 0.065672  | 1        | 559  | 11 | 0.0393002 |
| 0.0652941 | 1        | 555  | 16 | 0.0246818 |
| 0.0719062 | 1        | 613  | 17 | 0.0339154 |
| 0.0770588 | 1        | 655  | 19 | 0.0472008 |
| 0.0858824 | 1        | 730  | 20 | 0.0444996 |
| 0.119094  | 1        | 1036 | 26 | 0.0204004 |
| 0.100557  | 1        | 884  | 23 | 0.0321057 |
| 0.0818824 | 1        | 696  | 18 | 0.0418425 |
| 0.128786  | 1        | 1097 | 25 | 0.0339154 |
| 0.0796809 | 1        | 769  | 22 | 0.0375258 |
| 0.0706663 | 1        | 682  | 20 | 0.0486044 |
| 0.0742353 | 1        | 631  | 13 | 0.0300577 |
| 0.0472793 | 1        | 782  | 18 | 0.0103194 |
| 0.0749748 | 1        | 669  | 18 | 0.0338271 |
| 0.0787059 | 1        | 669  | 18 | 0.0338271 |
| 0.0416465 | 1        | 601  | 17 | 0.0410568 |
| 0.0700575 | 1        | 1011 | 24 | 0.0386116 |
| 0.0990484 | 1        | 968  | 27 | 0.0220688 |
| 0.110364  | 1        | 968  | 27 | 0.0220688 |
| 0.0683912 | 1        | 616  | 17 | 0.0442171 |
| 0.0834899 | 1        | 711  | 20 | 0.0273388 |
| 0.0725882 | 1        | 617  | 17 | 0.0464681 |
| 0.0825882 | 1        | 702  | 20 | 0.036184  |
| 0.0424372 | 1        | 716  | 20 | 0.0361134 |
| 0.0706363 | 1        | 605  | 17 | 0.046627  |
| 0.136804  | 1        | 1172 | 32 | 0.0277802 |
| 0.0694642 | 1        | 1172 | 32 | 0.0277802 |
| 0.0720374 | 1        | 617  | 18 | 0.0497078 |
| 0.0958824 | 1        | 815  | 22 | 0.0476157 |
| 0.0449215 | 1        | 655  | 19 | 0.0330326 |
| 0.0590221 | 0.458824 | 1105 | 31 | 0.0386999 |
| 0.0711765 | 1        | 605  | 17 | 0.0420808 |
| 0.109765  | 1        | 933  | 26 | 0.0351777 |
| 0.0372101 | 1        | 621  | 17 | 0.0472184 |
| 0.0893382 | 1        | 760  | 16 | 0.0298724 |
| 0.104471  | 1        | 888  | 20 | 0.0463092 |
| 0.076986  | 1        | 659  | 18 | 0.0467682 |
| 0.0598221 | 1        | 659  | 18 | 0.0467682 |
| 0.0678135 | 1        | 611  | 13 | 0.0254145 |
| 0.0568973 | 1        | 874  | 23 | 0.0238608 |



|           |          |      |    |            |
|-----------|----------|------|----|------------|
| 0.0732941 | 1        | 623  | 18 | 0.0376229  |
| 0.124825  | 1        | 1071 | 27 | 0.0102664  |
| 0.0870588 | 1        | 740  | 21 | 0.0497431  |
| 0.0834117 | 1        | 710  | 19 | 0.0339065  |
| 0.0967179 | 1        | 831  | 21 | 0.0358309  |
| 0.115767  | 1        | 989  | 16 | 0.031885   |
| 0.202449  | 1        | 1802 | 48 | 0.0358574  |
| 0.0899415 | 1        | 769  | 22 | 0.0384615  |
| 0.0882973 | 1        | 796  | 22 | 0.0366695  |
| 0.0722617 | 0.932388 | 917  | 26 | 0.0343479  |
| 0.113803  | 1        | 977  | 27 | 0.025282   |
| 0.082155  | 1        | 703  | 19 | 0.0388853  |
| 0.055294  | 1        | 599  | 17 | 0.0491252  |
| 0.0523749 | 1        | 623  | 16 | 0.0476775  |
| 0.0870588 | 1        | 740  | 21 | 0.047854   |
| 0.0844706 | 1        | 718  | 20 | 0.0449145  |
| 0.128673  | 1        | 1099 | 30 | 0.0215921  |
| 0.0829412 | 1        | 705  | 19 | 0.0498049  |
| 0.131412  | 1        | 1117 | 24 | 0.00652354 |
| 0.110118  | 1        | 936  | 23 | 0.0470331  |
| 0.117765  | 1        | 1001 | 27 | 0.0306139  |
| 0.0687149 | 1        | 624  | 17 | 0.0330591  |
| 0.0405765 | 1        | 656  | 18 | 0.0388764  |
| 0.0822353 | 1        | 699  | 20 | 0.0474215  |
| 0.112703  | 1        | 960  | 19 | 0.0165869  |
| 0.0852941 | 1        | 725  | 15 | 0.0227397  |
| 0.0404706 | 1        | 344  | 10 | 0.0466093  |
| 0.0888158 | 1        | 756  | 21 | 0.0368108  |
| 0.113884  | 1        | 972  | 23 | 0.0385498  |
| 0.0716787 | 1        | 614  | 12 | 0.0444643  |
| 0.0729301 | 1        | 621  | 14 | 0.0377642  |
| 0.0647059 | 1        | 550  | 13 | 0.0360869  |
| 0.0856471 | 1        | 728  | 20 | 0.0229869  |
| 0.0844145 | 1        | 1041 | 19 | 0.0297753  |
| 0.0695683 | 1        | 593  | 17 | 0.0275242  |
| 0.0742609 | 1        | 633  | 18 | 0.0423015  |
| 0.0701693 | 1        | 597  | 17 | 0.0368108  |
| 0.129059  | 1        | 1097 | 24 | 0.0222895  |
| 0.119602  | 1        | 1022 | 29 | 0.0235783  |
| 0.09      | 1        | 765  | 20 | 0.0257234  |
| 0.148235  | 1        | 1260 | 35 | 0.0385233  |
| 0.136852  | 0.950794 | 1260 | 35 | 0.0385233  |
| 0.0785236 | 1        | 668  | 14 | 0.0182288  |
| 0.0772986 | 1        | 665  | 19 | 0.0439964  |
| 0.12173   | 1        | 1047 | 18 | 0.0322028  |
| 0.0869656 | 1        | 830  | 20 | 0.0261736  |
| 0.121792  | 1        | 1044 | 23 | 0.0135503  |

|           |   |      |    |            |
|-----------|---|------|----|------------|
| 0.0765882 | 1 | 651  | 18 | 0.0458149  |
| 0.0763905 | 1 | 651  | 18 | 0.0458149  |
| 0.0441896 | 1 | 813  | 23 | 0.0349923  |
| 0.0889592 | 1 | 759  | 21 | 0.0459296  |
| 0.348235  | 1 | 2960 | 71 | 0.0131883  |
| 0.260824  | 1 | 2217 | 62 | 0.0033368  |
| 0.235765  | 1 | 2004 | 56 | 0.00443142 |
| 0.275412  | 1 | 2341 | 59 | 0.00606451 |
| 0.120588  | 1 | 1025 | 29 | 0.033783   |
| 0.0789412 | 1 | 671  | 12 | 0.0347981  |
| 0.0692601 | 1 | 600  | 12 | 0.0488957  |
| 0.0442073 | 1 | 377  | 11 | 0.0378348  |
| 0.0936914 | 1 | 799  | 18 | 0.018785   |
| 0.112184  | 1 | 964  | 25 | 0.0190057  |
| 0.0921176 | 1 | 783  | 19 | 0.0249643  |
| 0.140471  | 1 | 1194 | 34 | 0.0187585  |
| 0.188706  | 1 | 1604 | 34 | 0.0183259  |
| 0.0718824 | 1 | 611  | 17 | 0.0414011  |
| 0.074     | 1 | 629  | 18 | 0.0390265  |
| 0.0939054 | 1 | 812  | 18 | 0.0290955  |
| 0.0723189 | 1 | 615  | 15 | 0.049646   |
| 0.0871355 | 1 | 741  | 20 | 0.0170989  |
| 0.0960378 | 1 | 875  | 22 | 0.0124556  |
| 0.105838  | 1 | 901  | 25 | 0.0367313  |
| 0.121289  | 1 | 1046 | 28 | 0.0386557  |
| 0.0870826 | 1 | 751  | 21 | 0.0366078  |
| 0.019208  | 1 | 341  | 10 | 0.0490457  |
| 0.106706  | 1 | 907  | 24 | 0.0368461  |
| 0.134     | 1 | 1139 | 32 | 0.0222454  |
| 0.0738824 | 1 | 628  | 18 | 0.0477658  |
| 0.0845882 | 1 | 719  | 21 | 0.0244611  |
| 0.0918824 | 1 | 781  | 22 | 0.047854   |
| 0.0807191 | 1 | 687  | 14 | 0.0128087  |
| 0.0795294 | 1 | 676  | 19 | 0.037261   |
| 0.0723529 | 1 | 615  | 15 | 0.0471302  |
| 0.0524221 | 1 | 777  | 17 | 0.0179022  |
| 0.0945279 | 1 | 805  | 21 | 0.0484102  |
| 0.0681774 | 1 | 1044 | 28 | 0.0216627  |
| 0.058643  | 1 | 898  | 22 | 0.0243993  |
| 0.102431  | 1 | 1007 | 28 | 0.0257322  |
| 0.0749412 | 1 | 637  | 16 | 0.0457884  |
| 0.0708235 | 1 | 602  | 17 | 0.0495401  |
| 0.0762353 | 1 | 648  | 18 | 0.0434844  |
| 0.149294  | 1 | 1269 | 31 | 0.00678837 |
| 0.0895294 | 1 | 761  | 18 | 0.00749457 |
| 0.0737647 | 1 | 627  | 13 | 0.0441553  |
| 0.112353  | 1 | 955  | 27 | 0.0234371  |

|            |         |      |    |            |
|------------|---------|------|----|------------|
| 0.0665988  | 1       | 589  | 16 | 0.0483925  |
| 0.0837647  | 1       | 712  | 20 | 0.0481542  |
| 0.0782885  | 1       | 666  | 17 | 0.0319115  |
| 0.0781874  | 1       | 666  | 17 | 0.0319115  |
| 0.0460945  | 1       | 609  | 12 | 0.0464946  |
| 0.110027   | 1       | 936  | 23 | 0.0258558  |
| 0.0728235  | 1       | 619  | 18 | 0.046627   |
| 0.0303057  | 1       | 350  | 10 | 0.0480659  |
| 0.0858824  | 1       | 730  | 19 | 0.0429106  |
| 0.0704706  | 1       | 599  | 15 | 0.0496548  |
| 0.106588   | 1       | 906  | 25 | 0.0340389  |
| 0.0702353  | 1       | 597  | 17 | 0.0496548  |
| 0.0775294  | 1       | 659  | 18 | 0.0439787  |
| 0.107412   | 1       | 913  | 26 | 0.0375435  |
| 0.131412   | 1       | 1117 | 31 | 0.0200826  |
| 0.121903   | 1       | 1535 | 42 | 0.00735333 |
| 0.0917647  | 1       | 780  | 20 | 0.014892   |
| 0.0758072  | 1       | 648  | 14 | 0.0439081  |
| 0.116941   | 1       | 994  | 28 | 0.0208595  |
| 0.428471   | 1       | 3642 | 99 | 0.00722974 |
| 0.0977647  | 1       | 831  | 24 | 0.0351865  |
| 0.0877647  | 1       | 746  | 21 | 0.0341007  |
| 0.0811765  | 1       | 690  | 19 | 0.0333592  |
| 0.0260126  | 1       | 596  | 14 | 0.0472096  |
| 0.0762353  | 1       | 648  | 11 | 0.0437492  |
| 0.0692941  | 1       | 589  | 17 | 0.0445349  |
| 0.0158955  | 1       | 504  | 10 | 0.0238255  |
| 0.03746    | 1       | 620  | 18 | 0.0389647  |
| 0.0709412  | 1       | 603  | 17 | 0.0460179  |
| 0.0808235  | 1       | 687  | 15 | 0.0298547  |
| 0.0543644  | 1       | 464  | 13 | 0.00694727 |
| 0.0790366  | 1       | 676  | 18 | 0.0429018  |
| 0.00704391 | 0.12605 | 476  | 10 | 0.00997511 |
| 0.135349   | 1       | 1164 | 32 | 0.0249025  |
| 0.387674   | 1       | 3334 | 87 | 0.0076005  |
| 0.163488   | 1       | 1406 | 38 | 0.00791829 |
| 0.0787929  | 1       | 671  | 19 | 0.0403418  |
| 0.0843812  | 1       | 718  | 15 | 0.0479246  |
| 0.119647   | 1       | 1017 | 29 | 0.0329355  |
| 0.136588   | 1       | 1161 | 33 | 0.0195265  |
| 0.0745882  | 1       | 634  | 18 | 0.0486308  |
| 0.0867059  | 1       | 737  | 21 | 0.043864   |
| 0.069125   | 1       | 598  | 17 | 0.0484102  |
| 0.126235   | 1       | 1073 | 30 | 0.038285   |
| 0.158359   | 1       | 1382 | 34 | 0.0201532  |
| 0.0677918  | 1       | 960  | 27 | 0.0315849  |
| 0.0838924  | 1       | 1188 | 29 | 0.0382585  |

|           |          |      |    |            |
|-----------|----------|------|----|------------|
| 0.111372  | 1        | 947  | 27 | 0.0384792  |
| 0.175482  | 1        | 2485 | 68 | 0.00309846 |
| 0.0876471 | 1        | 745  | 21 | 0.0492576  |
| 0.167412  | 1        | 1423 | 39 | 0.0131265  |
| 0.0685882 | 1        | 583  | 16 | 0.0466623  |
| 0.0598824 | 1        | 509  | 15 | 0.0164192  |
| 0.0790588 | 1        | 672  | 14 | 0.0482248  |
| 0.121647  | 1        | 1034 | 29 | 0.0236136  |
| 0.0885882 | 1        | 753  | 20 | 0.0330414  |
| 0.0690588 | 1        | 587  | 17 | 0.0396179  |
| 0.111799  | 1        | 957  | 23 | 0.0264031  |
| 0.0922353 | 1        | 784  | 17 | 0.0387617  |
| 0.0685882 | 1        | 583  | 16 | 0.0386116  |
| 0.0494631 | 1        | 608  | 10 | 0.0201356  |
| 0.0713866 | 1        | 608  | 10 | 0.0201356  |
| 0.0711765 | 1        | 605  | 17 | 0.0410127  |
| 0.0724706 | 1        | 616  | 15 | 0.0406949  |
| 0.0782353 | 1        | 665  | 19 | 0.0401476  |
| 0.110235  | 1        | 937  | 25 | 0.0255557  |
| 0.0464353 | 1        | 594  | 17 | 0.0432725  |
| 0.048     | 1        | 408  | 11 | 0.0459473  |
| 0.114052  | 1        | 1086 | 26 | 0.0370933  |
| 0.0435713 | 1        | 713  | 20 | 0.0464946  |
| 0.0848235 | 1        | 721  | 20 | 0.0329532  |
| 0.109176  | 1        | 928  | 23 | 0.0237549  |
| 0.0912941 | 1        | 776  | 22 | 0.0375964  |
| 0.08      | 1        | 680  | 20 | 0.038488   |
| 0.123882  | 1        | 1053 | 28 | 0.0358486  |
| 0.0511622 | 1        | 843  | 24 | 0.0258029  |
| 0.056     | 1        | 476  | 14 | 0.0462033  |
| 0.120824  | 1        | 1027 | 23 | 0.0378613  |
| 0.118588  | 1        | 1008 | 20 | 0.0341802  |
| 0.155765  | 1        | 1324 | 37 | 0.0189704  |
| 0.218941  | 0.767423 | 2425 | 67 | 0.00737099 |
| 0.113222  | 1        | 1013 | 27 | 0.0451528  |
| 0.0718824 | 1        | 611  | 17 | 0.0475716  |
| 0.0976471 | 1        | 830  | 22 | 0.0296693  |
| 0.131882  | 1        | 1121 | 31 | 0.0179375  |
| 0.118706  | 1        | 1009 | 28 | 0.0235077  |
| 0.130824  | 1        | 1112 | 32 | 0.046627   |
| 0.121319  | 1        | 1034 | 21 | 0.0389294  |
| 0.0722353 | 1        | 614  | 17 | 0.0458943  |
| 0.179214  | 1        | 1545 | 41 | 0.0261118  |
| 0.117302  | 1        | 1000 | 22 | 0.0255734  |
| 0.106395  | 1        | 905  | 25 | 0.0295722  |
| 0.0715294 | 1        | 608  | 17 | 0.0486662  |
| 0.0520301 | 1        | 774  | 20 | 0.0130383  |

|           |   |      |    |            |
|-----------|---|------|----|------------|
| 0.0630778 | 1 | 539  | 15 | 0.0483837  |
| 0.134446  | 1 | 1144 | 32 | 0.0362194  |
| 0.0912668 | 1 | 835  | 20 | 0.0260147  |
| 0.0908557 | 1 | 773  | 22 | 0.0449321  |
| 0.100235  | 1 | 852  | 22 | 0.0262089  |
| 0.0765312 | 1 | 661  | 18 | 0.0353366  |
| 0.0579063 | 1 | 635  | 18 | 0.0387529  |
| 0.0812559 | 1 | 691  | 19 | 0.0370668  |
| 0.080252  | 1 | 688  | 20 | 0.0356103  |
| 0.104706  | 1 | 890  | 26 | 0.0353366  |
| 0.0870588 | 1 | 740  | 14 | 0.0191999  |
| 0.114941  | 1 | 977  | 27 | 0.0356985  |
| 0.0715451 | 1 | 614  | 17 | 0.0474744  |
| 0.0708504 | 1 | 604  | 17 | 0.0473685  |
| 0.0710588 | 1 | 604  | 17 | 0.0473685  |
| 0.0604013 | 1 | 599  | 17 | 0.0405007  |
| 0.0623459 | 1 | 531  | 15 | 0.0494695  |
| 0.066776  | 1 | 570  | 11 | 0.035981   |
| 0.0757966 | 1 | 647  | 16 | 0.0387617  |
| 0.0891368 | 1 | 759  | 21 | 0.0470066  |
| 0.156406  | 1 | 1349 | 37 | 0.029687   |
| 0.125529  | 1 | 1067 | 26 | 0.0235872  |
| 0.125529  | 1 | 1067 | 26 | 0.0235872  |
| 0.0969412 | 1 | 824  | 20 | 0.0124203  |
| 0.0633224 | 1 | 539  | 15 | 0.0495401  |
| 0.0560701 | 1 | 896  | 25 | 0.022113   |
| 0.0645769 | 1 | 754  | 17 | 0.0253968  |
| 0.0599636 | 1 | 758  | 16 | 0.0238343  |
| 0.0527987 | 1 | 449  | 13 | 0.0475274  |
| 0.0911336 | 1 | 775  | 22 | 0.0349835  |
| 0.0808176 | 1 | 688  | 20 | 0.0384704  |
| 0.130333  | 1 | 1109 | 27 | 0.0379319  |
| 0.0448077 | 1 | 381  | 10 | 0.048675   |
| 0.047764  | 1 | 408  | 11 | 0.044782   |
| 0.0666042 | 1 | 569  | 12 | 0.0480571  |
| 0.10007   | 1 | 1577 | 40 | 0.00549955 |
| 0.0519703 | 1 | 819  | 23 | 0.0468212  |
| 0.188118  | 1 | 1599 | 41 | 0.00451087 |
| 0.0700869 | 1 | 597  | 10 | 0.048675   |
| 0.07      | 1 | 595  | 15 | 0.0408979  |
| 0.034719  | 1 | 598  | 17 | 0.0480571  |
| 0.0806906 | 1 | 687  | 19 | 0.0315849  |
| 0.108455  | 1 | 980  | 27 | 0.0260589  |
| 0.127647  | 1 | 1085 | 30 | 0.0176374  |
| 0.114156  | 1 | 983  | 25 | 0.0453558  |
| 0.0532817 | 1 | 1087 | 25 | 0.0254056  |
| 0.218525  | 1 | 1878 | 44 | 0.0323794  |

|           |   |      |    |            |
|-----------|---|------|----|------------|
| 0.0809048 | 1 | 769  | 18 | 0.0259441  |
| 0.0710004 | 1 | 604  | 12 | 0.0465652  |
| 0.0698824 | 1 | 594  | 17 | 0.0458678  |
| 0.0554927 | 1 | 883  | 25 | 0.0381173  |
| 0.0774929 | 1 | 659  | 16 | 0.0449321  |
| 0.0365061 | 1 | 601  | 17 | 0.0492311  |
| 0.0475005 | 1 | 782  | 16 | 0.0317085  |
| 0.10645   | 1 | 911  | 23 | 0.0137798  |
| 0.221714  | 1 | 1889 | 44 | 0.00565844 |
| 0.0590959 | 1 | 587  | 17 | 0.0485602  |
| 0.100941  | 1 | 858  | 24 | 0.0263943  |
| 0.0741176 | 1 | 630  | 16 | 0.0334563  |
| 0.123408  | 1 | 1095 | 30 | 0.0128705  |
| 0.0716471 | 1 | 609  | 15 | 0.0480747  |
| 0.0943529 | 1 | 802  | 22 | 0.0376406  |
| 0.0970588 | 1 | 825  | 23 | 0.0456207  |
| 0.0314626 | 1 | 518  | 15 | 0.0468212  |
| 0.140536  | 1 | 1237 | 33 | 0.0290426  |
| 0.106118  | 1 | 902  | 25 | 0.0248848  |
| 0.0770588 | 1 | 655  | 18 | 0.0373581  |
| 0.119291  | 1 | 1016 | 28 | 0.0217422  |
| 0.103647  | 1 | 881  | 23 | 0.019041   |
| 0.0535898 | 1 | 468  | 10 | 0.0468389  |
| 0.180824  | 1 | 1537 | 41 | 0.0234547  |
| 0.0697299 | 1 | 604  | 11 | 0.0265179  |
| 0.111059  | 1 | 944  | 21 | 0.0180876  |
| 0.0827953 | 1 | 731  | 20 | 0.0240727  |
| 0.109072  | 1 | 963  | 27 | 0.0363782  |
| 0.0857647 | 1 | 729  | 20 | 0.0362194  |
| 0.0756471 | 1 | 643  | 18 | 0.040739   |
| 0.091155  | 1 | 775  | 16 | 0.0262089  |
| 0.0692105 | 1 | 604  | 17 | 0.0478893  |
| 0.0570169 | 1 | 1617 | 40 | 0.00573789 |
| 0.0260578 | 1 | 739  | 21 | 0.035213   |
| 0.0308181 | 1 | 874  | 25 | 0.0264296  |
| 0.0383639 | 1 | 1088 | 31 | 0.0325559  |
| 0.0349788 | 1 | 992  | 28 | 0.0251143  |
| 0.0159732 | 1 | 453  | 13 | 0.0468035  |
| 0.0441114 | 1 | 1251 | 35 | 0.0067972  |
| 0.075814  | 1 | 652  | 19 | 0.0388235  |
| 0.0717442 | 1 | 617  | 17 | 0.0475009  |
| 0.0682189 | 1 | 586  | 16 | 0.0300136  |
| 0.0743773 | 1 | 636  | 16 | 0.0462651  |
| 0.0985187 | 1 | 838  | 21 | 0.0313377  |
| 0.205834  | 1 | 1750 | 49 | 0.0166929  |
| 0.0885898 | 1 | 757  | 21 | 0.0133825  |
| 0.107647  | 1 | 915  | 25 | 0.0326001  |

|           |          |      |    |            |
|-----------|----------|------|----|------------|
| 0.0730562 | 1        | 638  | 18 | 0.0422839  |
| 0.0721565 | 1        | 616  | 17 | 0.0392472  |
| 0.0558824 | 1        | 475  | 13 | 0.0329002  |
| 0.0692941 | 1        | 589  | 13 | 0.0438993  |
| 0.124353  | 1        | 1057 | 29 | 0.0261736  |
| 0.0543928 | 1        | 486  | 13 | 0.047854   |
| 0.0454847 | 1        | 890  | 17 | 0.0183789  |
| 0.0491803 | 1        | 423  | 12 | 0.0456913  |
| 0.0608138 | 1        | 683  | 17 | 0.0362458  |
| 0.0882353 | 1        | 750  | 21 | 0.0479246  |
| 0.0334419 | 1        | 688  | 20 | 0.0329443  |
| 0.0745802 | 1        | 644  | 18 | 0.0445525  |
| 0.0569285 | 1        | 774  | 22 | 0.0249731  |
| 0.0640171 | 1        | 1411 | 36 | 0.00736216 |
| 0.0315321 | 1        | 695  | 20 | 0.0388411  |
| 0.0902221 | 1        | 776  | 22 | 0.0366254  |
| 0.0606845 | 1        | 516  | 15 | 0.0135856  |
| 0.126043  | 1        | 1073 | 29 | 0.0389294  |
| 0.0395868 | 1        | 594  | 15 | 0.0477216  |
| 0.0645863 | 1        | 594  | 15 | 0.0477216  |
| 0.0708235 | 1        | 602  | 17 | 0.0437492  |
| 0.0463529 | 0.539726 | 730  | 18 | 0.0294398  |
| 0.0784706 | 1        | 667  | 19 | 0.0490457  |
| 0.170706  | 1        | 1451 | 41 | 0.0258029  |
| 0.08      | 1        | 680  | 19 | 0.0482866  |
| 0.0914118 | 1        | 777  | 20 | 0.0344803  |
| 0.112235  | 1        | 954  | 27 | 0.044579   |
| 0.118941  | 1        | 1011 | 28 | 0.025132   |
| 0.103765  | 1        | 882  | 23 | 0.0462474  |
| 0.0537647 | 1        | 457  | 13 | 0.0434579  |
| 0.0967059 | 1        | 822  | 23 | 0.0261913  |
| 0.109765  | 1        | 933  | 21 | 0.0270475  |
| 0.304471  | 1        | 2588 | 67 | 0.0189086  |
| 0.124118  | 1        | 1055 | 29 | 0.0336682  |
| 0.0940112 | 1        | 821  | 23 | 0.0348599  |
| 0.0689412 | 1        | 586  | 17 | 0.046627   |
| 0.0517647 | 1        | 440  | 13 | 0.0371992  |
| 0.118118  | 0.971926 | 1033 | 29 | 0.01039    |
| 0.0747059 | 1        | 635  | 18 | 0.0454176  |
| 0.0717642 | 1        | 611  | 17 | 0.0449321  |
| 0.111267  | 1        | 952  | 27 | 0.0172225  |
| 0.0828235 | 1        | 704  | 17 | 0.0133296  |
| 0.0727059 | 1        | 618  | 18 | 0.040227   |
| 0.0911765 | 1        | 775  | 22 | 0.025282   |
| 0.0741176 | 1        | 630  | 18 | 0.0437845  |
| 0.088     | 1        | 748  | 22 | 0.0246906  |
| 0.0478322 | 1        | 684  | 19 | 0.0459385  |

|            |          |      |    |           |
|------------|----------|------|----|-----------|
| 0.0699252  | 1        | 598  | 16 | 0.0413305 |
| 0.106353   | 1        | 904  | 23 | 0.038541  |
| 0.0964706  | 1        | 820  | 23 | 0.0228809 |
| 0.049739   | 1        | 667  | 15 | 0.0301548 |
| 0.0778933  | 1        | 667  | 15 | 0.0301548 |
| 0.0506946  | 1        | 759  | 40 | 0.0373846 |
| 0.0395905  | 1        | 611  | 11 | 0.0394502 |
| 0.0938416  | 1        | 800  | 21 | 0.0270475 |
| 0.0790588  | 1        | 672  | 19 | 0.0360958 |
| 0.0456238  | 1        | 882  | 21 | 0.0189792 |
| 0.0771765  | 1        | 656  | 19 | 0.0441023 |
| 0.0370691  | 1        | 642  | 16 | 0.0361399 |
| 0.0426507  | 0.986413 | 368  | 11 | 0.0238785 |
| 0.00847059 | 0.118421 | 608  | 16 | 0.0446938 |
| 0.0709783  | 1        | 608  | 16 | 0.0446938 |
| 0.103412   | 1        | 879  | 25 | 0.0381791 |
| 0.0961246  | 1        | 821  | 21 | 0.028663  |
| 0.0389006  | 1        | 627  | 13 | 0.0477658 |
| 0.0722498  | 1        | 641  | 18 | 0.0375347 |
| 0.0763538  | 1        | 650  | 15 | 0.0434226 |
| 0.0813717  | 1        | 719  | 16 | 0.0443583 |
| 0.0941835  | 1        | 808  | 23 | 0.0350365 |
| 0.100423   | 1        | 854  | 23 | 0.0469271 |
| 0.0911765  | 1        | 775  | 17 | 0.0445084 |
| 0.100588   | 1        | 855  | 20 | 0.0221747 |
| 0.0701657  | 1        | 635  | 18 | 0.0381879 |
| 0.0650129  | 1        | 553  | 16 | 0.0287777 |
| 0.115656   | 1        | 984  | 27 | 0.0473773 |
| 0.0786728  | 1        | 671  | 15 | 0.0277626 |
| 0.0777647  | 1        | 661  | 19 | 0.0389559 |
| 0.0717647  | 1        | 610  | 17 | 0.0473244 |
| 0.0705121  | 1        | 610  | 17 | 0.0473244 |
| 0.107529   | 1        | 914  | 25 | 0.0346922 |
| 0.0718824  | 1        | 611  | 16 | 0.0317526 |
| 0.0164348  | 1        | 638  | 17 | 0.0254145 |
| 0.0693252  | 1        | 638  | 17 | 0.0254145 |
| 0.0445422  | 1        | 719  | 15 | 0.0256175 |
| 0.0790805  | 1        | 719  | 15 | 0.0256175 |
| 0.0278696  | 1        | 523  | 15 | 0.0349658 |
| 0.0715609  | 1        | 618  | 14 | 0.0438728 |
| 0.0690663  | 1        | 591  | 16 | 0.0378613 |
| 0.0865836  | 1        | 757  | 20 | 0.0278773 |
| 0.0735656  | 1        | 627  | 16 | 0.0398122 |
| 0.0961176  | 1        | 817  | 17 | 0.035213  |
| 0.0574118  | 1        | 488  | 12 | 0.0488604 |
| 0.0271985  | 1        | 750  | 20 | 0.0442789 |
| 0.12257    | 1        | 1053 | 29 | 0.0334828 |



|           |          |      |    |            |
|-----------|----------|------|----|------------|
| 0.0980279 | 0.912017 | 932  | 26 | 0.0255204  |
| 0.095629  | 1        | 932  | 26 | 0.0255204  |
| 0.0725957 | 1        | 622  | 13 | 0.0465122  |
| 0.0667269 | 1        | 591  | 15 | 0.0466447  |
| 0.0725882 | 1        | 617  | 13 | 0.0472714  |
| 0.101229  | 1        | 865  | 24 | 0.0377377  |
| 0.0341242 | 1        | 850  | 24 | 0.024823   |
| 0.0570146 | 1        | 851  | 24 | 0.0485955  |
| 0.0540667 | 1        | 807  | 22 | 0.0455059  |
| 0.0373467 | 1        | 679  | 19 | 0.0488515  |
| 0.054     | 1        | 459  | 13 | 0.037976   |
| 0.0753162 | 1        | 786  | 22 | 0.0382938  |
| 0.0875852 | 1        | 745  | 21 | 0.0309581  |
| 0.0745019 | 1        | 1148 | 31 | 0.0353631  |
| 0.0562153 | 1        | 819  | 21 | 0.0365107  |
| 0.0963529 | 1        | 819  | 21 | 0.0365107  |
| 0.0967059 | 1        | 822  | 17 | 0.0170195  |
| 0.0729983 | 1        | 764  | 22 | 0.0237196  |
| 0.0652941 | 1        | 555  | 13 | 0.0321057  |
| 0.0457701 | 1        | 567  | 11 | 0.04683    |
| 0.124797  | 1        | 1154 | 32 | 0.0365901  |
| 0.0791765 | 1        | 673  | 19 | 0.0454     |
| 0.0874118 | 1        | 743  | 21 | 0.0389735  |
| 0.125674  | 1        | 1072 | 30 | 0.0390353  |
| 0.108228  | 1        | 1072 | 30 | 0.0390353  |
| 0.112     | 1        | 952  | 25 | 0.0343656  |
| 0.106471  | 1        | 905  | 20 | 0.0245847  |
| 0.136757  | 1        | 1169 | 29 | 0.0238343  |
| 0.0683201 | 1        | 584  | 16 | 0.0481542  |
| 0.081297  | 1        | 692  | 20 | 0.0338977  |
| 0.132588  | 1        | 1127 | 27 | 0.00642644 |
| 0.135412  | 1        | 1151 | 26 | 0.024876   |
| 0.0660501 | 1        | 607  | 13 | 0.0369873  |
| 0.0709467 | 1        | 652  | 17 | 0.0345951  |
| 0.0267865 | 1        | 608  | 18 | 0.0487456  |
| 0.0338796 | 1        | 769  | 20 | 0.0369344  |
| 0.0854118 | 1        | 726  | 21 | 0.0382408  |
| 0.0722353 | 1        | 614  | 17 | 0.048675   |
| 0.0785882 | 1        | 668  | 19 | 0.0491164  |
| 0.111765  | 1        | 950  | 21 | 0.00915415 |
| 0.171412  | 1        | 1457 | 39 | 0.00483749 |
| 0.0715294 | 1        | 608  | 17 | 0.0438463  |
| 0.123647  | 1        | 1051 | 30 | 0.0135767  |
| 0.0696174 | 1        | 626  | 18 | 0.0412422  |
| 0.0873915 | 1        | 926  | 25 | 0.0364224  |
| 0.0711184 | 1        | 606  | 17 | 0.0473332  |
| 0.0712941 | 1        | 606  | 17 | 0.0473332  |

|           |   |      |    |            |
|-----------|---|------|----|------------|
| 0.134471  | 1 | 1143 | 27 | 0.0181141  |
| 0.0736879 | 1 | 629  | 18 | 0.034701   |
| 0.0991765 | 1 | 843  | 23 | 0.0228103  |
| 0.101067  | 1 | 919  | 26 | 0.0331562  |
| 0.107649  | 1 | 919  | 26 | 0.0331562  |
| 0.0695804 | 1 | 597  | 11 | 0.0470949  |
| 0.218167  | 1 | 1859 | 49 | 0.0138945  |
| 0.0989321 | 1 | 843  | 22 | 0.0251938  |
| 0.0686628 | 1 | 610  | 17 | 0.0475716  |
| 0.0914118 | 1 | 777  | 17 | 0.0254056  |
| 0.135882  | 1 | 1155 | 32 | 0.0225014  |
| 0.103799  | 1 | 888  | 24 | 0.0243463  |
| 0.108721  | 1 | 935  | 27 | 0.0352483  |
| 0.0762138 | 1 | 653  | 15 | 0.0461856  |
| 0.106395  | 1 | 1098 | 29 | 0.0477746  |
| 0.186919  | 1 | 1929 | 53 | 0.0110697  |
| 0.0744706 | 1 | 633  | 13 | 0.0345863  |
| 0.0709412 | 1 | 603  | 17 | 0.0447556  |
| 0.0892983 | 1 | 761  | 18 | 0.0391236  |
| 0.0977585 | 1 | 833  | 18 | 0.0256263  |
| 0.0997889 | 1 | 851  | 24 | 0.0343921  |
| 0.117647  | 1 | 1000 | 26 | 0.0251231  |
| 0.0872941 | 1 | 742  | 20 | 0.0401829  |
| 0.0694118 | 1 | 590  | 17 | 0.0345509  |
| 0.0851765 | 1 | 724  | 17 | 0.031682   |
| 0.071479  | 1 | 608  | 15 | 0.0466005  |
| 0.0734603 | 1 | 625  | 18 | 0.0426723  |
| 0.0852941 | 1 | 725  | 17 | 0.0317085  |
| 0.0909759 | 1 | 1114 | 31 | 0.0111933  |
| 0.0704706 | 1 | 599  | 17 | 0.0452852  |
| 0.0748179 | 1 | 637  | 18 | 0.00807719 |
| 0.0805882 | 1 | 685  | 19 | 0.0450292  |
| 0.10214   | 1 | 883  | 24 | 0.0332003  |
| 0.0772377 | 1 | 661  | 12 | 0.0477746  |
| 0.0561947 | 1 | 508  | 14 | 0.0366695  |
| 0.0885882 | 1 | 753  | 20 | 0.0383203  |
| 0.0689129 | 1 | 587  | 17 | 0.0489133  |
| 0.0900617 | 1 | 773  | 22 | 0.00890698 |
| 0.181529  | 1 | 1543 | 39 | 0.0257058  |
| 0.0695294 | 1 | 591  | 17 | 0.0486662  |
| 0.0709412 | 1 | 603  | 17 | 0.0475098  |
| 0.0707414 | 1 | 603  | 17 | 0.0475098  |
| 0.0721176 | 1 | 613  | 18 | 0.0447644  |
| 0.0949412 | 1 | 807  | 23 | 0.0178846  |
| 0.0742353 | 1 | 631  | 17 | 0.0356191  |
| 0.0913563 | 1 | 780  | 21 | 0.0176639  |
| 0.0869412 | 1 | 739  | 20 | 0.0464769  |

|           |          |      |    |            |
|-----------|----------|------|----|------------|
| 0.0724183 | 1        | 669  | 18 | 0.0341007  |
| 0.0647708 | 1        | 599  | 14 | 0.0431931  |
| 0.0761176 | 1        | 647  | 13 | 0.0465299  |
| 0.0752941 | 1        | 640  | 12 | 0.036749   |
| 0.0702353 | 1        | 597  | 16 | 0.0479246  |
| 0.0881176 | 1        | 749  | 21 | 0.030658   |
| 0.059169  | 1        | 806  | 23 | 0.0298724  |
| 0.10302   | 1        | 880  | 25 | 0.0376582  |
| 0.0527171 | 1        | 746  | 17 | 0.0361311  |
| 0.0962353 | 1        | 818  | 23 | 0.034957   |
| 0.0771765 | 1        | 656  | 19 | 0.0464858  |
| 0.147529  | 1        | 1254 | 35 | 0.00562313 |
| 0.0728235 | 1        | 619  | 13 | 0.0486044  |
| 0.068977  | 1        | 619  | 13 | 0.0486044  |
| 0.0522648 | 1        | 585  | 16 | 0.0459826  |
| 0.197176  | 1        | 1676 | 47 | 0.0189439  |
| 0.0870122 | 1        | 747  | 20 | 0.0260059  |
| 0.0724944 | 1        | 617  | 17 | 0.0470242  |
| 0.0697456 | 1        | 595  | 17 | 0.0476333  |
| 0.116719  | 1        | 999  | 43 | 0.0188203  |
| 0.102933  | 1        | 881  | 20 | 0.0319115  |
| 0.0688359 | 1        | 586  | 16 | 0.0497078  |
| 0.106425  | 1        | 906  | 25 | 0.0195088  |
| 0.0698547 | 1        | 596  | 17 | 0.0433785  |
| 0.0992824 | 1        | 844  | 24 | 0.0228015  |
| 0.111438  | 1        | 1060 | 29 | 0.0172578  |
| 0.0648486 | 1        | 604  | 16 | 0.0491252  |
| 0.183983  | 1        | 1576 | 42 | 0.00847443 |
| 0.0766886 | 1        | 654  | 18 | 0.0373846  |
| 0.0783896 | 1        | 773  | 22 | 0.038232   |
| 0.101815  | 1        | 1004 | 28 | 0.0252114  |
| 0.182235  | 1        | 1549 | 40 | 0.00571141 |
| 0.116721  | 1        | 1008 | 27 | 0.0253791  |
| 0.0414514 | 1        | 353  | 10 | 0.0462916  |
| 0.066604  | 1        | 567  | 16 | 0.0293604  |
| 0.0882353 | 1        | 750  | 18 | 0.0383468  |
| 0.186789  | 1        | 1592 | 41 | 0.00203033 |
| 0.0921176 | 1        | 783  | 19 | 0.0364312  |
| 0.0506329 | 0.661609 | 659  | 19 | 0.0491252  |
| 0.0773565 | 1        | 659  | 19 | 0.0491252  |
| 0.0681686 | 1        | 587  | 13 | 0.0458943  |
| 0.0689048 | 1        | 587  | 13 | 0.0458943  |
| 0.209836  | 1        | 1792 | 49 | 0.0048728  |
| 0.0693628 | 1        | 590  | 16 | 0.0458502  |
| 0.192606  | 1        | 1641 | 43 | 0.00424604 |
| 0.0350313 | 1        | 599  | 17 | 0.0499903  |
| 0.0696232 | 1        | 606  | 17 | 0.0485779  |

|           |   |      |    |            |
|-----------|---|------|----|------------|
| 0.0756471 | 1 | 643  | 12 | 0.0472184  |
| 0.0447548 | 1 | 628  | 18 | 0.0344362  |
| 0.0845882 | 1 | 719  | 13 | 0.0183083  |
| 0.08      | 1 | 680  | 19 | 0.0333592  |
| 0.0836462 | 1 | 713  | 20 | 0.0352042  |
| 0.0724706 | 1 | 616  | 17 | 0.0462739  |
| 0.0770588 | 1 | 655  | 17 | 0.0366607  |
| 0.0691765 | 1 | 588  | 17 | 0.0437845  |
| 0.143731  | 1 | 1222 | 32 | 0.0190939  |
| 0.143765  | 1 | 1222 | 32 | 0.0190939  |
| 0.0755294 | 1 | 642  | 18 | 0.0475892  |
| 0.166608  | 1 | 1418 | 38 | 0.0104165  |
| 0.0896471 | 1 | 762  | 20 | 0.0348599  |
| 0.0862353 | 1 | 733  | 21 | 0.0408361  |
| 0.0905882 | 1 | 770  | 16 | 0.0260412  |
| 0.0666667 | 1 | 567  | 15 | 0.0325118  |
| 0.0431156 | 1 | 703  | 19 | 0.0239403  |
| 0.112481  | 1 | 958  | 27 | 0.0355926  |
| 0.0573285 | 1 | 591  | 15 | 0.0423721  |
| 0.0751527 | 1 | 640  | 18 | 0.0454618  |
| 0.0750821 | 1 | 640  | 18 | 0.0454618  |
| 0.39913   | 1 | 3393 | 86 | 0.00735333 |
| 0.0767059 | 1 | 652  | 19 | 0.0388146  |
| 0.130818  | 1 | 1113 | 28 | 0.00236578 |
| 0.131641  | 1 | 1120 | 30 | 0.0241786  |
| 0.0682327 | 1 | 610  | 16 | 0.0464769  |
| 0.0626476 | 1 | 610  | 16 | 0.0464769  |
| 0.072217  | 1 | 615  | 14 | 0.0140269  |
| 0.0715613 | 1 | 616  | 10 | 0.0490281  |
| 0.0743132 | 1 | 633  | 18 | 0.0492311  |
| 0.108165  | 1 | 922  | 24 | 0.0260412  |
| 0.0609412 | 1 | 518  | 11 | 0.0332621  |
| 0.225647  | 1 | 1918 | 52 | 0.00652354 |
| 0.139294  | 1 | 1184 | 33 | 0.0120761  |
| 0.096907  | 1 | 824  | 23 | 0.0231369  |
| 0.180941  | 1 | 1538 | 43 | 0.0133825  |
| 0.095544  | 1 | 2067 | 48 | 0.00183613 |
| 0.104974  | 1 | 2271 | 61 | 0.0106636  |
| 0.0195526 | 1 | 423  | 11 | 0.0196677  |
| 0.133309  | 1 | 2884 | 68 | 0.00158013 |
| 0.148285  | 1 | 3208 | 82 | 0.00143889 |
| 0.0711765 | 1 | 605  | 17 | 0.0364577  |
| 0.0718824 | 1 | 611  | 15 | 0.0418425  |
| 0.0883324 | 1 | 910  | 26 | 0.0226867  |
| 0.0722353 | 1 | 614  | 17 | 0.0491252  |
| 0.132     | 1 | 1122 | 31 | 0.0228986  |
| 0.0957647 | 1 | 814  | 23 | 0.0474303  |

|           |   |      |    |            |
|-----------|---|------|----|------------|
| 0.0812019 | 1 | 781  | 22 | 0.0139034  |
| 0.116492  | 1 | 991  | 28 | 0.0263149  |
| 0.132588  | 1 | 1127 | 30 | 0.0335269  |
| 0.050135  | 1 | 427  | 11 | 0.0474833  |
| 0.0956471 | 1 | 813  | 14 | 0.0351071  |
| 0.0717647 | 1 | 610  | 17 | 0.0390353  |
| 0.0865882 | 1 | 736  | 18 | 0.0240462  |
| 0.104801  | 1 | 930  | 24 | 0.0221306  |
| 0.07798   | 1 | 664  | 18 | 0.0489133  |
| 0.0697647 | 1 | 593  | 17 | 0.0113699  |
| 0.113575  | 1 | 973  | 24 | 0.034957   |
| 0.123964  | 1 | 1062 | 30 | 0.0220335  |
| 0.0418249 | 1 | 705  | 20 | 0.0388146  |
| 0.101995  | 1 | 869  | 25 | 0.0100634  |
| 0.0700556 | 1 | 605  | 15 | 0.0493371  |
| 0.0448374 | 1 | 644  | 15 | 0.0162691  |
| 0.102759  | 1 | 894  | 23 | 0.0369432  |
| 0.0422904 | 1 | 873  | 21 | 0.0316026  |
| 0.0501341 | 1 | 430  | 10 | 0.0404919  |
| 0.116766  | 1 | 998  | 28 | 0.013356   |
| 0.0898824 | 1 | 764  | 20 | 0.0481718  |
| 0.0728235 | 1 | 619  | 13 | 0.040024   |
| 0.0727059 | 1 | 618  | 17 | 0.0351777  |
| 0.0725182 | 1 | 618  | 17 | 0.0351777  |
| 0.0481692 | 1 | 788  | 18 | 0.0183171  |
| 0.1       | 1 | 865  | 21 | 0.0253968  |
| 0.0707059 | 1 | 601  | 17 | 0.0433255  |
| 0.0525571 | 1 | 594  | 15 | 0.0457884  |
| 0.0788614 | 1 | 676  | 19 | 0.0475009  |
| 0.0756471 | 1 | 643  | 18 | 0.0331827  |
| 0.0770588 | 1 | 655  | 18 | 0.0377377  |
| 0.0773274 | 1 | 662  | 19 | 0.0367843  |
| 0.0702353 | 1 | 597  | 17 | 0.0252997  |
| 0.07577   | 1 | 647  | 18 | 0.0452941  |
| 0.0456384 | 1 | 598  | 13 | 0.0322028  |
| 0.0696888 | 1 | 598  | 13 | 0.0322028  |
| 0.0706172 | 1 | 603  | 11 | 0.0470154  |
| 0.0905477 | 1 | 1025 | 28 | 0.0347805  |
| 0.0896293 | 1 | 764  | 20 | 0.0497078  |
| 0.146513  | 1 | 1271 | 34 | 0.0138592  |
| 0.0728401 | 1 | 634  | 18 | 0.0458943  |
| 0.102995  | 1 | 877  | 25 | 0.0264738  |
| 0.071857  | 1 | 611  | 17 | 0.046627   |
| 0.108941  | 1 | 926  | 19 | 0.0313377  |
| 0.0841894 | 1 | 754  | 21 | 0.0384439  |
| 0.0753344 | 1 | 642  | 18 | 0.00994862 |
| 0.0883529 | 1 | 751  | 16 | 0.0354072  |

|           |          |      |    |            |
|-----------|----------|------|----|------------|
| 0.09      | 0.374633 | 2042 | 57 | 0.0182377  |
| 0.0563866 | 1        | 818  | 16 | 0.0183171  |
| 0.0612314 | 0.862559 | 633  | 18 | 0.0457884  |
| 0.0888235 | 1        | 755  | 14 | 0.0259794  |
| 0.0729412 | 1        | 620  | 10 | 0.0343038  |
| 0.0727059 | 1        | 618  | 16 | 0.042531   |
| 0.0711765 | 1        | 605  | 17 | 0.0438375  |
| 0.115593  | 1        | 983  | 19 | 0.0403153  |
| 0.0708069 | 1        | 602  | 17 | 0.0382762  |
| 0.0476786 | 1        | 801  | 22 | 0.0250967  |
| 0.0407738 | 1        | 685  | 19 | 0.0476687  |
| 0.0694348 | 1        | 602  | 16 | 0.0422397  |
| 0.0624507 | 1        | 792  | 22 | 0.038232   |
| 0.115647  | 1        | 983  | 21 | 0.0254056  |
| 0.0854249 | 1        | 759  | 21 | 0.0429459  |
| 0.0916569 | 1        | 780  | 22 | 0.0467859  |
| 0.0438395 | 1        | 554  | 10 | 0.0477746  |
| 0.11902   | 1        | 1025 | 27 | 0.0131707  |
| 0.0978824 | 1        | 832  | 23 | 0.0376582  |
| 0.0482984 | 1        | 413  | 12 | 0.0480924  |
| 0.0683529 | 1        | 581  | 10 | 0.044835   |
| 0.0858826 | 1        | 758  | 21 | 0.0174785  |
| 0.0881747 | 1        | 771  | 20 | 0.0218746  |
| 0.0217662 | 1        | 925  | 23 | 0.0240727  |
| 0.125529  | 1        | 1067 | 30 | 0.0103988  |
| 0.0586476 | 1        | 706  | 20 | 0.0106636  |
| 0.0601176 | 1        | 511  | 14 | 0.049134   |
| 0.0714535 | 1        | 614  | 14 | 0.00617927 |
| 0.0781176 | 1        | 664  | 13 | 0.026306   |
| 0.0944706 | 1        | 803  | 21 | 0.0343656  |
| 0.0911404 | 1        | 788  | 17 | 0.0363782  |
| 0.0689412 | 1        | 586  | 17 | 0.0490457  |
| 0.115029  | 1        | 982  | 24 | 0.00880104 |
| 0.0831765 | 1        | 707  | 19 | 0.046115   |
| 0.0528598 | 1        | 451  | 11 | 0.0444819  |
| 0.08939   | 1        | 765  | 20 | 0.0348158  |
| 0.125761  | 1        | 1095 | 30 | 0.022775   |
| 0.0609287 | 1        | 950  | 26 | 0.0278508  |
| 0.111424  | 1        | 950  | 26 | 0.0278508  |
| 0.0796471 | 1        | 677  | 13 | 0.0425575  |
| 0.0770019 | 1        | 676  | 19 | 0.0388853  |
| 0.0797647 | 1        | 678  | 19 | 0.02334    |
| 0.0392872 | 1        | 571  | 16 | 0.0466005  |
| 0.136518  | 1        | 1163 | 33 | 0.0328737  |
| 0.0695306 | 1        | 594  | 17 | 0.0499903  |
| 0.068     | 1        | 578  | 14 | 0.0460885  |
| 0.0623529 | 1        | 530  | 15 | 0.0457884  |

|            |           |      |    |            |
|------------|-----------|------|----|------------|
| 0.0717647  | 1         | 610  | 17 | 0.0497343  |
| 0.0978824  | 1         | 832  | 24 | 0.0330326  |
| 0.0848235  | 1         | 721  | 17 | 0.0380466  |
| 0.0382528  | 1         | 599  | 17 | 0.0488692  |
| 0.104019   | 1         | 893  | 25 | 0.0264384  |
| 0.104775   | 1         | 893  | 25 | 0.0264384  |
| 0.0781176  | 1         | 664  | 15 | 0.0385763  |
| 0.0469545  | 1         | 646  | 18 | 0.0486838  |
| 0.0445559  | 1         | 613  | 18 | 0.048675   |
| 0.0834118  | 1         | 709  | 20 | 0.0489486  |
| 0.0635294  | 1         | 540  | 15 | 0.044782   |
| 0.0858824  | 1         | 730  | 21 | 0.0338889  |
| 0.0688278  | 1         | 586  | 16 | 0.0434314  |
| 0.121447   | 1         | 1034 | 29 | 0.0356809  |
| 0.107882   | 1         | 917  | 26 | 0.0267474  |
| 0.082      | 1         | 697  | 17 | 0.0444731  |
| 0.127412   | 1         | 1083 | 30 | 0.0131089  |
| 0.0752455  | 1         | 904  | 23 | 0.0208241  |
| 0.0678204  | 1         | 580  | 13 | 0.0152981  |
| 0.0699212  | 1         | 603  | 16 | 0.0484366  |
| 0.100257   | 1         | 859  | 22 | 0.0184142  |
| 0.111228   | 1         | 953  | 27 | 0.0215833  |
| 0.0988727  | 1         | 842  | 14 | 0.0498932  |
| 0.117059   | 1         | 995  | 22 | 0.0170371  |
| 0.00496823 | 0.0695793 | 618  | 18 | 0.0362811  |
| 0.0931765  | 1         | 792  | 23 | 0.0471567  |
| 0.0833431  | 1         | 709  | 20 | 0.0369167  |
| 0.0520937  | 1         | 734  | 19 | 0.0293515  |
| 0.0978223  | 1         | 849  | 17 | 0.0440582  |
| 0.0754969  | 1         | 1189 | 30 | 0.00573789 |
| 0.0943953  | 1         | 992  | 28 | 0.0188556  |
| 0.120848   | 1         | 1037 | 23 | 0.0084656  |
| 0.0956329  | 1         | 865  | 18 | 0.0413305  |
| 0.076346   | 1         | 692  | 20 | 0.0369962  |
| 0.0762106  | 1         | 650  | 19 | 0.0487103  |
| 0.0868728  | 0.988402  | 776  | 22 | 0.0320351  |
| 0.0814564  | 1         | 698  | 20 | 0.0328649  |
| 0.0792289  | 1         | 785  | 22 | 0.0313642  |
| 0.076      | 1         | 646  | 18 | 0.040739   |
| 0.0634278  | 1         | 611  | 17 | 0.0455412  |
| 0.111907   | 1         | 1078 | 30 | 0.0335711  |
| 0.0699488  | 1         | 601  | 17 | 0.0412599  |
| 0.0690259  | 1         | 591  | 13 | 0.0353278  |
| 0.0749059  | 1         | 637  | 18 | 0.0374993  |
| 0.0642051  | 1         | 546  | 16 | 0.0129941  |
| 0.0672337  | 1         | 585  | 17 | 0.0364224  |
| 0.141593   | 1         | 1232 | 35 | 0.036237   |

|           |          |      |    |           |
|-----------|----------|------|----|-----------|
| 0.109183  | 1        | 950  | 27 | 0.0174255 |
| 0.0405095 | 1        | 582  | 12 | 0.0465122 |
| 0.0919353 | 1        | 790  | 20 | 0.0447379 |
| 0.0738786 | 1        | 672  | 19 | 0.0317703 |
| 0.105621  | 1        | 902  | 23 | 0.0378613 |
| 0.110693  | 1        | 941  | 20 | 0.0135856 |
| 0.100341  | 1        | 853  | 24 | 0.0107608 |
| 0.121391  | 1        | 1051 | 29 | 0.0313024 |
| 0.126011  | 1        | 1091 | 31 | 0.0236578 |
| 0.0695311 | 1        | 602  | 13 | 0.0462474 |
| 0.117882  | 1        | 1002 | 25 | 0.0156777 |
| 0.101882  | 1        | 866  | 24 | 0.020215  |
| 0.0894987 | 1        | 773  | 22 | 0.0459561 |
| 0.0662841 | 1        | 566  | 10 | 0.0330061 |
| 0.0809228 | 1        | 691  | 20 | 0.048675  |
| 0.123551  | 1        | 1055 | 30 | 0.0236754 |
| 0.0796855 | 1        | 679  | 18 | 0.0452676 |
| 0.0794984 | 1        | 710  | 19 | 0.0126587 |
| 0.0974118 | 1        | 828  | 22 | 0.0164369 |
| 0.13      | 1        | 1105 | 27 | 0.0127469 |
| 0.102704  | 1        | 923  | 24 | 0.0466093 |
| 0.0722594 | 1        | 615  | 17 | 0.036237  |
| 0.0708235 | 1        | 602  | 15 | 0.0370844 |
| 0.0808279 | 1        | 699  | 20 | 0.0262619 |
| 0.229765  | 1        | 1953 | 41 | 0.013974  |
| 0.0496409 | 1        | 940  | 25 | 0.0325383 |
| 0.0940281 | 1        | 803  | 21 | 0.0436874 |
| 0.0943042 | 1        | 803  | 21 | 0.0436874 |
| 0.123294  | 1        | 1048 | 29 | 0.0188026 |
| 0.0838857 | 1        | 772  | 20 | 0.0330414 |
| 0.0695294 | 1        | 591  | 13 | 0.0474038 |
| 0.098     | 1        | 833  | 23 | 0.0296693 |
| 0.0765818 | 1        | 656  | 18 | 0.0332003 |
| 0.0919715 | 1        | 787  | 17 | 0.026818  |
| 0.108671  | 1        | 940  | 26 | 0.0239844 |
| 0.126584  | 1        | 1079 | 27 | 0.013718  |
| 0.0816471 | 1        | 694  | 20 | 0.0351777 |
| 0.0280596 | 1        | 603  | 17 | 0.0495666 |
| 0.0543529 | 1        | 462  | 10 | 0.0397768 |
| 0.0717647 | 1        | 610  | 17 | 0.0403859 |
| 0.131294  | 1        | 1116 | 31 | 0.0361134 |
| 0.0363837 | 1        | 658  | 12 | 0.0345951 |
| 0.0729412 | 1        | 620  | 14 | 0.0493724 |
| 0.0456397 | 1        | 762  | 21 | 0.043405  |
| 0.105765  | 1        | 899  | 24 | 0.0330414 |
| 0.0561898 | 1        | 945  | 21 | 0.0422309 |
| 0.084694  | 0.762963 | 945  | 21 | 0.0422309 |



|           |          |      |    |            |
|-----------|----------|------|----|------------|
| 0.0963097 | 1        | 1010 | 22 | 0.0246288  |
| 0.0965122 | 1        | 1010 | 22 | 0.0246288  |
| 0.0550047 | 1        | 760  | 20 | 0.0431666  |
| 0.092942  | 1        | 798  | 15 | 0.0429724  |
| 0.0763547 | 1        | 651  | 15 | 0.0457619  |
| 0.018947  | 1        | 619  | 17 | 0.0491075  |
| 0.0787059 | 1        | 669  | 19 | 0.0140976  |
| 0.119765  | 1        | 1018 | 28 | 0.0180788  |
| 0.037907  | 1        | 865  | 21 | 0.026306   |
| 0.0512209 | 1        | 623  | 16 | 0.0490193  |
| 0.032     | 0.436597 | 623  | 16 | 0.0490193  |
| 0.0697647 | 1        | 593  | 17 | 0.0384439  |
| 0.0162353 | 0.115966 | 1190 | 28 | 0.0179022  |
| 0.0366716 | 1        | 669  | 17 | 0.0363165  |
| 0.166006  | 1        | 3935 | 99 | 0.00064441 |
| 0.102     | 1        | 867  | 24 | 0.0152981  |
| 0.0259028 | 1        | 614  | 11 | 0.0279568  |
| 0.0462353 | 0.640065 | 614  | 11 | 0.0279568  |
| 0.0685882 | 1        | 583  | 16 | 0.0488251  |
| 0.0710719 | 1        | 612  | 17 | 0.0426546  |
| 0.112569  | 1        | 1004 | 23 | 0.033933   |
| 0.0698331 | 1        | 594  | 16 | 0.0497078  |
| 0.0733582 | 1        | 630  | 18 | 0.0422839  |
| 0.0778962 | 1        | 665  | 14 | 0.0477216  |
| 0.113059  | 1        | 961  | 20 | 0.0239049  |
| 0.123736  | 1        | 1052 | 29 | 0.0137798  |
| 0.0718824 | 1        | 611  | 17 | 0.0401829  |
| 0.0689655 | 1        | 596  | 17 | 0.0479511  |
| 0.0758661 | 1        | 646  | 18 | 0.0441553  |
| 0.0453399 | 1        | 827  | 22 | 0.0470949  |
| 0.116618  | 1        | 1033 | 23 | 0.0289013  |
| 0.0994282 | 1        | 852  | 24 | 0.0247083  |
| 0.0283655 | 0.286385 | 852  | 24 | 0.0247083  |
| 0.0484649 | 1        | 884  | 24 | 0.0245935  |
| 0.0802353 | 1        | 682  | 19 | 0.0370933  |
| 0.0674403 | 1        | 587  | 17 | 0.0495842  |
| 0.0695294 | 1        | 591  | 14 | 0.0497784  |
| 0.0869412 | 1        | 739  | 20 | 0.0377024  |
| 0.237882  | 1        | 2022 | 47 | 0.0139387  |
| 0.134624  | 1        | 1147 | 31 | 0.0317879  |
| 0.0833917 | 1        | 714  | 20 | 0.0425222  |
| 0.151176  | 0.996124 | 1290 | 34 | 0.0075034  |
| 0.0808235 | 1        | 687  | 14 | 0.0406243  |
| 0.0775983 | 1        | 663  | 19 | 0.0242934  |
| 0.115964  | 1        | 1062 | 23 | 0.0331562  |
| 0.0825882 | 1        | 702  | 20 | 0.0357074  |
| 0.0747059 | 1        | 635  | 18 | 0.0371109  |

|           |   |      |    |            |
|-----------|---|------|----|------------|
| 0.0864706 | 1 | 735  | 21 | 0.048366   |
| 0.076     | 1 | 646  | 15 | 0.0331562  |
| 0.0740907 | 1 | 660  | 18 | 0.0466447  |
| 0.0776471 | 1 | 660  | 16 | 0.0406596  |
| 0.0701898 | 1 | 599  | 14 | 0.0357515  |
| 0.0721092 | 1 | 613  | 12 | 0.0493724  |
| 0.0707059 | 1 | 601  | 10 | 0.0475716  |
| 0.117329  | 1 | 998  | 27 | 0.0171077  |
| 0.076082  | 1 | 668  | 19 | 0.0431754  |
| 0.121868  | 1 | 1070 | 30 | 0.0352571  |
| 0.0790588 | 1 | 672  | 17 | 0.0257146  |
| 0.138056  | 1 | 1179 | 31 | 0.0136032  |
| 0.0842353 | 1 | 716  | 17 | 0.0409244  |
| 0.0715656 | 1 | 634  | 16 | 0.0347981  |
| 0.0695338 | 1 | 616  | 15 | 0.0417277  |
| 0.0438824 | 1 | 373  | 11 | 0.0452323  |
| 0.106761  | 1 | 908  | 21 | 0.00480217 |
| 0.166569  | 1 | 1417 | 28 | 0.0352307  |
| 0.0720922 | 1 | 613  | 17 | 0.0492753  |
| 0.0686897 | 1 | 584  | 12 | 0.0491164  |
| 0.0944706 | 1 | 803  | 22 | 0.0360604  |
| 0.0515824 | 1 | 590  | 11 | 0.0454882  |
| 0.0817308 | 1 | 697  | 17 | 0.0426105  |
| 0.123227  | 1 | 1051 | 28 | 0.0465476  |
| 0.0972771 | 1 | 936  | 25 | 0.0238167  |
| 0.0747059 | 1 | 635  | 15 | 0.0400152  |
| 0.0789938 | 1 | 672  | 19 | 0.0311435  |
| 0.0705718 | 1 | 606  | 17 | 0.0469007  |
| 0.109059  | 1 | 927  | 23 | 0.0469801  |
| 0.0696582 | 1 | 593  | 12 | 0.0409333  |
| 0.0668693 | 1 | 704  | 20 | 0.0134178  |
| 0.0518502 | 1 | 716  | 20 | 0.0452941  |
| 0.0628576 | 1 | 868  | 17 | 0.0341714  |
| 0.154442  | 1 | 1316 | 37 | 0.0181847  |
| 0.109176  | 1 | 928  | 26 | 0.0454     |
| 0.0464189 | 1 | 687  | 19 | 0.0271711  |
| 0.214235  | 1 | 1821 | 51 | 0.0178228  |
| 0.0737647 | 1 | 627  | 18 | 0.0436521  |
| 0.0955294 | 1 | 812  | 23 | 0.0213803  |
| 0.0927059 | 1 | 788  | 20 | 0.0333945  |
| 0.103933  | 1 | 888  | 24 | 0.0261295  |
| 0.0764279 | 1 | 653  | 16 | 0.028663   |
| 0.0775294 | 1 | 659  | 15 | 0.0454529  |
| 0.0782077 | 1 | 665  | 18 | 0.0365107  |
| 0.0898824 | 1 | 764  | 22 | 0.0397857  |
| 0.0725882 | 1 | 617  | 18 | 0.0492046  |
| 0.112471  | 1 | 956  | 27 | 0.0307728  |

|           |   |      |    |            |
|-----------|---|------|----|------------|
| 0.112941  | 1 | 960  | 27 | 0.0202327  |
| 0.0711597 | 1 | 605  | 17 | 0.0431666  |
| 0.118577  | 1 | 1013 | 23 | 0.0464858  |
| 0.158     | 1 | 1343 | 37 | 0.00868629 |
| 0.0564787 | 1 | 690  | 16 | 0.0378348  |
| 0.0936471 | 1 | 796  | 22 | 0.0306845  |
| 0.0254334 | 1 | 600  | 14 | 0.0482336  |
| 0.0805882 | 1 | 685  | 18 | 0.0383379  |
| 0.211623  | 1 | 3594 | 99 | 0.00193323 |
| 0.128069  | 1 | 2175 | 58 | 0.00632051 |
| 0.104118  | 1 | 885  | 25 | 0.0140799  |
| 0.0738824 | 1 | 628  | 18 | 0.0301019  |
| 0.0751765 | 1 | 639  | 18 | 0.0297223  |
| 0.0693058 | 1 | 590  | 16 | 0.049902   |
| 0.0694118 | 1 | 590  | 16 | 0.049902   |
| 0.069229  | 1 | 589  | 17 | 0.0462474  |
| 0.0692941 | 1 | 589  | 17 | 0.0462474  |
| 0.0583556 | 1 | 763  | 21 | 0.0451263  |
| 0.165412  | 1 | 1406 | 38 | 0.0140358  |
| 0.102353  | 1 | 870  | 18 | 0.0240727  |
| 0.163176  | 1 | 1387 | 38 | 0.00774174 |
| 0.0438821 | 1 | 685  | 12 | 0.0384439  |
| 0.0692941 | 1 | 589  | 17 | 0.0467594  |
| 0.122118  | 1 | 1038 | 21 | 0.0455412  |
| 0.0990588 | 1 | 842  | 23 | 0.0386028  |
| 0.115347  | 1 | 3295 | 91 | 0.00868629 |
| 0.0454386 | 1 | 1298 | 30 | 0.0181494  |
| 0.116235  | 1 | 988  | 28 | 0.0313465  |
| 0.115522  | 1 | 3300 | 90 | 0.00109461 |
| 0.0805853 | 1 | 2302 | 64 | 0.0106813  |
| 0.0560807 | 1 | 1602 | 42 | 0.00911001 |
| 0.0412028 | 1 | 1177 | 28 | 0.0189527  |
| 0.0924176 | 1 | 2640 | 72 | 0.00221571 |
| 0.0429882 | 1 | 1228 | 33 | 0.0170901  |
| 0.0842273 | 1 | 738  | 16 | 0.0184407  |
| 0.0872016 | 1 | 2491 | 69 | 0.00834201 |
| 0.0763495 | 1 | 2181 | 59 | 0.00914532 |
| 0.0959402 | 1 | 1347 | 38 | 0.0140005  |
| 0.0416667 | 1 | 585  | 14 | 0.0410833  |
| 0.0475071 | 1 | 667  | 18 | 0.0246465  |
| 0.0429487 | 1 | 603  | 15 | 0.0440494  |
| 0.0709412 | 1 | 603  | 15 | 0.0440494  |
| 0.0507835 | 1 | 713  | 19 | 0.0293515  |
| 0.0838824 | 1 | 713  | 19 | 0.0293515  |
| 0.045245  | 1 | 638  | 17 | 0.0273212  |
| 0.0809872 | 1 | 1142 | 32 | 0.0257499  |
| 0.0957647 | 1 | 814  | 23 | 0.0376494  |

|           |   |      |    |            |
|-----------|---|------|----|------------|
| 0.0685882 | 1 | 583  | 16 | 0.0475098  |
| 0.140588  | 1 | 1195 | 34 | 0.0159513  |
| 0.259029  | 1 | 3421 | 93 | 0.00301019 |
| 0.0979026 | 1 | 1293 | 36 | 0.00808601 |
| 0.0622397 | 1 | 822  | 22 | 0.0471567  |
| 0.0228817 | 1 | 899  | 25 | 0.019703   |
| 0.0297539 | 1 | 1169 | 24 | 0.0252026  |
| 0.0268778 | 1 | 1056 | 28 | 0.0181847  |
| 0.0407239 | 1 | 1600 | 44 | 0.0189792  |
| 0.0275904 | 1 | 1084 | 31 | 0.0361487  |
| 0.0565553 | 1 | 2222 | 55 | 0.0214421  |
| 0.0467561 | 1 | 1837 | 51 | 0.0182377  |
| 0.0202601 | 1 | 796  | 22 | 0.0297753  |
| 0.0780142 | 1 | 671  | 16 | 0.0433343  |
| 0.0476215 | 1 | 1871 | 52 | 0.0141152  |
| 0.0302375 | 1 | 1188 | 33 | 0.0189174  |
| 0.0824149 | 1 | 3238 | 87 | 0.0140358  |
| 0.0564354 | 1 | 1151 | 32 | 0.0190675  |
| 0.0476097 | 1 | 971  | 25 | 0.0134796  |
| 0.0607059 | 1 | 516  | 15 | 0.0498844  |
| 0.103359  | 1 | 2108 | 59 | 0.0107872  |
| 0.0440765 | 1 | 599  | 17 | 0.0488515  |
| 0.0347634 | 1 | 709  | 18 | 0.0379407  |
| 0.108017  | 1 | 2203 | 61 | 0.010955   |
| 0.0415788 | 1 | 848  | 24 | 0.0348599  |
| 0.264353  | 1 | 2247 | 62 | 0.00659416 |
| 0.0837647 | 1 | 712  | 17 | 0.0485779  |
| 0.210824  | 1 | 1792 | 50 | 0.0236931  |
| 0.101937  | 1 | 1268 | 35 | 0.0351247  |
| 0.0487059 | 1 | 414  | 12 | 0.0190939  |
| 0.0504864 | 1 | 628  | 18 | 0.032397   |
| 0.085457  | 1 | 1063 | 28 | 0.0379142  |
| 0.0716471 | 1 | 609  | 15 | 0.0476687  |
| 0.105294  | 1 | 895  | 23 | 0.0231723  |
| 0.219529  | 1 | 1866 | 52 | 0.00557017 |
| 0.16167   | 1 | 2621 | 72 | 0.00919828 |
| 0.0362077 | 1 | 587  | 16 | 0.0421603  |
| 0.0679127 | 1 | 1101 | 30 | 0.0252291  |
| 0.144338  | 1 | 2340 | 65 | 0.00694727 |
| 0.180299  | 1 | 1543 | 42 | 0.0111933  |
| 0.0900911 | 1 | 771  | 22 | 0.0316555  |
| 0.0726043 | 1 | 1535 | 43 | 0.0369079  |
| 0.0420963 | 1 | 890  | 25 | 0.0377377  |
| 0.0282849 | 1 | 598  | 17 | 0.0476333  |
| 0.0697647 | 1 | 593  | 17 | 0.0488427  |
| 0.0715294 | 1 | 608  | 17 | 0.0443671  |
| 0.0798824 | 1 | 679  | 19 | 0.045144   |

|           |          |      |    |            |
|-----------|----------|------|----|------------|
| 0.0723529 | 1        | 615  | 12 | 0.0495401  |
| 0.0877647 | 1        | 746  | 21 | 0.0411363  |
| 0.0836471 | 1        | 711  | 20 | 0.0358574  |
| 0.115412  | 1        | 981  | 27 | 0.0369785  |
| 0.0724706 | 1        | 616  | 13 | 0.0217422  |
| 0.0747059 | 1        | 635  | 18 | 0.0388499  |
| 0.0675788 | 1        | 978  | 28 | 0.0348599  |
| 0.0723529 | 1        | 615  | 18 | 0.0436874  |
| 0.0993797 | 1        | 1458 | 41 | 0.00775057 |
| 0.0653671 | 1        | 959  | 27 | 0.0240903  |
| 0.0765456 | 1        | 1123 | 32 | 0.0254763  |
| 0.0370118 | 1        | 543  | 16 | 0.0467682  |
| 0.0966612 | 1        | 828  | 22 | 0.0379407  |
| 0.117176  | 1        | 996  | 27 | 0.0378966  |
| 0.0908242 | 0.992347 | 784  | 22 | 0.0233223  |
| 0.251529  | 1        | 2138 | 56 | 0.00900408 |
| 0.138824  | 1        | 1180 | 33 | 0.0177168  |
| 0.0584706 | 1        | 497  | 11 | 0.0448703  |
| 0.0851765 | 1        | 724  | 21 | 0.0134796  |
| 0.0888235 | 1        | 755  | 18 | 0.0292544  |
| 0.0782353 | 1        | 665  | 13 | 0.041507   |
| 0.0861176 | 1        | 732  | 20 | 0.0371639  |
| 0.0728235 | 1        | 619  | 18 | 0.0470949  |
| 0.0716471 | 1        | 609  | 16 | 0.04668    |
| 0.0836471 | 1        | 711  | 20 | 0.0470419  |
| 0.0684566 | 1        | 719  | 20 | 0.0487721  |
| 0.0845882 | 1        | 719  | 20 | 0.0487721  |
| 0.0871765 | 1        | 741  | 19 | 0.045144   |
| 0.0579371 | 1        | 619  | 18 | 0.0378083  |
| 0.0936471 | 1        | 796  | 22 | 0.0231281  |
| 0.121412  | 1        | 1032 | 29 | 0.034648   |
| 0.0812646 | 1        | 694  | 19 | 0.0140358  |
| 0.0301755 | 1        | 459  | 13 | 0.0379937  |
| 0.0676484 | 1        | 1029 | 29 | 0.0180435  |
| 0.0358611 | 1        | 602  | 17 | 0.0487279  |
| 0.0572476 | 1        | 718  | 19 | 0.0454     |
| 0.116588  | 1        | 991  | 28 | 0.0189704  |
| 0.211294  | 1        | 1796 | 49 | 0.0233047  |
| 0.122235  | 1        | 1039 | 16 | 0.0416659  |
| 0.106824  | 1        | 908  | 24 | 0.0270475  |
| 0.0710588 | 1        | 604  | 17 | 0.0436256  |
| 0.121176  | 1        | 1030 | 29 | 0.0155011  |
| 0.0789258 | 1        | 673  | 17 | 0.0447467  |
| 0.0857647 | 1        | 729  | 20 | 0.0174432  |
| 0.112     | 1        | 952  | 27 | 0.0235872  |
| 0.204048  | 1        | 1744 | 48 | 0.017558   |
| 0.0737798 | 1        | 650  | 18 | 0.0491252  |

|           |          |      |    |            |
|-----------|----------|------|----|------------|
| 0.0781176 | 1        | 664  | 17 | 0.0195971  |
| 0.0707736 | 1        | 602  | 15 | 0.0404919  |
| 0.0704706 | 1        | 599  | 17 | 0.048878   |
| 0.0725882 | 1        | 617  | 16 | 0.0496195  |
| 0.0765879 | 1        | 668  | 18 | 0.0388323  |
| 0.0726676 | 1        | 620  | 16 | 0.0465652  |
| 0.0942445 | 1        | 804  | 21 | 0.0305874  |
| 0.107729  | 1        | 938  | 26 | 0.0471037  |
| 0.0798314 | 1        | 682  | 19 | 0.0328649  |
| 0.0678764 | 1        | 591  | 16 | 0.0437316  |
| 0.0682782 | 1        | 644  | 18 | 0.0433696  |
| 0.0736471 | 1        | 626  | 17 | 0.0402888  |
| 0.136941  | 1        | 1164 | 28 | 0.0214244  |
| 0.0841744 | 1        | 834  | 23 | 0.0237814  |
| 0.0708235 | 1        | 602  | 14 | 0.0412422  |
| 0.0617081 | 1        | 526  | 12 | 0.0491428  |
| 0.100959  | 1        | 863  | 25 | 0.0376935  |
| 0.0688647 | 1        | 589  | 16 | 0.0427341  |
| 0.0717647 | 1        | 610  | 15 | 0.0483484  |
| 0.0311645 | 1        | 592  | 14 | 0.0445172  |
| 0.0324805 | 1        | 617  | 10 | 0.0265532  |
| 0.0277953 | 1        | 528  | 15 | 0.0180876  |
| 0.105269  | 1        | 895  | 23 | 0.00894229 |
| 0.131883  | 1        | 1188 | 31 | 0.0161191  |
| 0.0706809 | 1        | 601  | 17 | 0.0478364  |
| 0.0718303 | 1        | 613  | 17 | 0.0492223  |
| 0.0703364 | 1        | 598  | 11 | 0.0421161  |
| 0.0800423 | 1        | 681  | 19 | 0.0459296  |
| 0.0492765 | 1        | 613  | 14 | 0.0479688  |
| 0.0699579 | 1        | 598  | 17 | 0.0354425  |
| 0.086     | 1        | 731  | 19 | 0.0298724  |
| 0.0560704 | 1        | 478  | 10 | 0.0130294  |
| 0.0824928 | 1        | 777  | 20 | 0.0373846  |
| 0.115124  | 1        | 985  | 20 | 0.0310729  |
| 0.107431  | 1        | 918  | 20 | 0.0256351  |
| 0.0771919 | 1        | 729  | 20 | 0.034957   |
| 0.0833238 | 1        | 729  | 20 | 0.034957   |
| 0.0912119 | 1        | 794  | 21 | 0.0300842  |
| 0.0821902 | 1        | 707  | 16 | 0.019041   |
| 0.0845696 | 1        | 724  | 21 | 0.0425752  |
| 0.076     | 1        | 646  | 18 | 0.0418601  |
| 0.0821219 | 1        | 1079 | 31 | 0.0224043  |
| 0.0773926 | 1        | 710  | 20 | 0.0476775  |
| 0.0691765 | 1        | 588  | 16 | 0.0398651  |
| 0.0723529 | 0.929003 | 662  | 19 | 0.0242492  |
| 0.0703052 | 1        | 599  | 17 | 0.0422574  |
| 0.227412  | 1        | 1933 | 54 | 0.0113963  |

|           |   |      |    |            |
|-----------|---|------|----|------------|
| 0.0725882 | 1 | 617  | 18 | 0.0195265  |
| 0.069868  | 1 | 598  | 17 | 0.0492311  |
| 0.0703529 | 1 | 598  | 17 | 0.0492311  |
| 0.102465  | 1 | 877  | 24 | 0.0234812  |
| 0.093061  | 1 | 802  | 20 | 0.0299606  |
| 0.0844496 | 1 | 725  | 21 | 0.0190233  |
| 0.135583  | 1 | 1153 | 31 | 0.0298724  |
| 0.12453   | 1 | 1059 | 30 | 0.017196   |
| 0.0892521 | 1 | 759  | 18 | 0.0138504  |
| 0.105466  | 1 | 903  | 25 | 0.0343479  |
| 0.10511   | 1 | 903  | 25 | 0.0343479  |
| 0.0689412 | 1 | 586  | 17 | 0.0495401  |
| 0.0760117 | 1 | 648  | 14 | 0.0462474  |
| 0.0772759 | 1 | 657  | 14 | 0.0356014  |
| 0.210941  | 1 | 1793 | 50 | 0.00711499 |
| 0.0783529 | 1 | 666  | 13 | 0.0298106  |
| 0.0769412 | 1 | 654  | 15 | 0.0378524  |
| 0.178471  | 1 | 1517 | 43 | 0.00996628 |
| 0.074     | 1 | 629  | 16 | 0.0257146  |
| 0.11369   | 1 | 970  | 27 | 0.0197472  |
| 0.0701176 | 1 | 596  | 17 | 0.0493371  |
| 0.211882  | 1 | 1801 | 44 | 0.0161985  |
| 0.13974   | 1 | 1191 | 30 | 0.0348599  |
| 0.0748235 | 1 | 636  | 18 | 0.0426634  |
| 0.112325  | 1 | 977  | 25 | 0.0153334  |
| 0.0745882 | 1 | 634  | 15 | 0.0400417  |
| 0.0458364 | 1 | 633  | 18 | 0.0431225  |
| 0.144335  | 1 | 1228 | 27 | 0.036749   |
| 0.134827  | 1 | 1228 | 27 | 0.036749   |
| 0.0592941 | 1 | 504  | 14 | 0.0377377  |
| 0.0968461 | 1 | 826  | 22 | 0.0488427  |
| 0.0508622 | 1 | 820  | 23 | 0.021857   |
| 0.072627  | 1 | 619  | 12 | 0.0488869  |
| 0.0676964 | 1 | 710  | 13 | 0.0177698  |
| 0.0774118 | 1 | 658  | 12 | 0.0452587  |
| 0.109765  | 1 | 933  | 26 | 0.0416571  |
| 0.069293  | 1 | 591  | 17 | 0.0470949  |
| 0.0690588 | 1 | 587  | 17 | 0.0328561  |
| 0.0731593 | 1 | 622  | 17 | 0.0405095  |
| 0.0711936 | 1 | 606  | 17 | 0.047854   |
| 0.0682801 | 1 | 584  | 11 | 0.0494077  |
| 0.0873378 | 1 | 747  | 21 | 0.0363165  |
| 0.0619688 | 1 | 576  | 16 | 0.0382762  |
| 0.0693546 | 1 | 590  | 15 | 0.0424428  |
| 0.0786687 | 1 | 676  | 19 | 0.0460356  |
| 0.0707059 | 1 | 601  | 12 | 0.0403242  |
| 0.0751229 | 1 | 1024 | 27 | 0.0344803  |

|           |          |      |    |             |
|-----------|----------|------|----|-------------|
| 0.08848   | 1        | 755  | 20 | 0.0349835   |
| 0.123529  | 1        | 1050 | 25 | 0.0131707   |
| 0.0785882 | 1        | 668  | 19 | 0.0386999   |
| 0.145529  | 1        | 1237 | 32 | 0.00888049  |
| 0.0672174 | 1        | 594  | 12 | 0.0432461   |
| 0.0870588 | 1        | 740  | 21 | 0.0240992   |
| 0.0708235 | 1        | 602  | 17 | 0.0436521   |
| 0.217882  | 1        | 1852 | 50 | 0.0196766   |
| 0.187882  | 0.854468 | 1869 | 50 | 0.000794478 |
| 0.0907386 | 1        | 774  | 22 | 0.0364312   |
| 0.0712941 | 1        | 606  | 17 | 0.0473773   |
| 0.164689  | 1        | 2151 | 58 | 0.00659416  |
| 0.100235  | 1        | 852  | 24 | 0.038232    |
| 0.271955  | 1        | 3552 | 94 | 0.00434314  |
| 0.0519103 | 1        | 678  | 20 | 0.0337741   |
| 0.0584988 | 1        | 498  | 14 | 0.0375258   |
| 0.0692941 | 1        | 589  | 12 | 0.039459    |
| 0.0726727 | 1        | 630  | 11 | 0.0166929   |
| 0.0598122 | 1        | 758  | 22 | 0.0348687   |
| 0.0712941 | 1        | 606  | 12 | 0.0369697   |
| 0.0702353 | 1        | 597  | 17 | 0.039309    |
| 0.196447  | 1        | 1670 | 34 | 0.00236578  |
| 0.064852  | 1        | 791  | 21 | 0.0307463   |
| 0.0465077 | 1        | 837  | 20 | 0.0231458   |
| 0.0705673 | 1        | 1270 | 32 | 0.00398121  |
| 0.0773196 | 1        | 660  | 15 | 0.0348599   |
| 0.0722665 | 1        | 616  | 17 | 0.0437492   |
| 0.0769142 | 1        | 664  | 19 | 0.0492753   |
| 0.0718317 | 1        | 611  | 14 | 0.0446408   |
| 0.0517859 | 1        | 593  | 13 | 0.0325383   |
| 0.203039  | 1        | 2325 | 62 | 0.0305079   |
| 0.136471  | 1        | 1160 | 30 | 0.0138945   |
| 0.0737955 | 1        | 628  | 17 | 0.0441553   |
| 0.131388  | 1        | 1139 | 29 | 0.0355661   |
| 0.134     | 1        | 1139 | 29 | 0.0355661   |
| 0.0821629 | 1        | 702  | 20 | 0.034701    |
| 0.0736471 | 1        | 626  | 18 | 0.0324147   |
| 0.0908557 | 1        | 774  | 22 | 0.0299871   |
| 0.0910588 | 1        | 774  | 22 | 0.0299871   |
| 0.0980484 | 1        | 834  | 23 | 0.0383733   |
| 0.0689331 | 1        | 586  | 12 | 0.0474391   |
| 0.0696938 | 1        | 594  | 16 | 0.0380113   |
| 0.120471  | 1        | 1024 | 26 | 0.0267827   |
| 0.0801826 | 1        | 685  | 20 | 0.037773    |
| 0.0605882 | 1        | 515  | 11 | 0.0494695   |
| 0.163412  | 1        | 1389 | 39 | 0.0240727   |
| 0.102118  | 1        | 868  | 17 | 0.0355926   |



|           |   |      |    |            |
|-----------|---|------|----|------------|
| 0.114575  | 1 | 974  | 27 | 0.0262619  |
| 0.0528479 | 1 | 900  | 25 | 0.0333416  |
| 0.0633001 | 1 | 539  | 15 | 0.0299871  |
| 0.0834019 | 1 | 710  | 20 | 0.0180435  |
| 0.0474188 | 1 | 654  | 17 | 0.0339065  |
| 0.0768598 | 1 | 654  | 17 | 0.0339065  |
| 0.0741176 | 1 | 630  | 18 | 0.0481542  |
| 0.110302  | 1 | 939  | 26 | 0.0183171  |
| 0.0959709 | 1 | 817  | 23 | 0.0335534  |
| 0.123412  | 1 | 1049 | 28 | 0.0494695  |
| 0.0488235 | 1 | 415  | 12 | 0.0479158  |
| 0.117868  | 1 | 1002 | 28 | 0.0345774  |
| 0.0850666 | 1 | 728  | 20 | 0.035778   |
| 0.0939459 | 1 | 959  | 27 | 0.038285   |
| 0.0531067 | 1 | 453  | 13 | 0.043096   |
| 0.0851765 | 1 | 724  | 14 | 0.0384351  |
| 0.084     | 1 | 714  | 33 | 0.0220953  |
| 0.137882  | 1 | 1172 | 33 | 0.0327766  |
| 0.0762353 | 1 | 648  | 15 | 0.0497784  |
| 0.0722353 | 1 | 614  | 17 | 0.0474038  |
| 0.0348627 | 1 | 655  | 19 | 0.0462474  |
| 0.0852941 | 1 | 725  | 18 | 0.0356985  |
| 0.0300606 | 1 | 590  | 16 | 0.0179552  |
| 0.0958084 | 1 | 816  | 23 | 0.0284688  |
| 0.0742353 | 1 | 631  | 14 | 0.0355043  |
| 0.0950566 | 1 | 898  | 24 | 0.0169312  |
| 0.0897647 | 1 | 763  | 17 | 0.0479423  |
| 0.0845882 | 1 | 719  | 20 | 0.0257411  |
| 0.0895294 | 1 | 761  | 22 | 0.038488   |
| 0.0915294 | 1 | 778  | 22 | 0.0353896  |
| 0.0912931 | 1 | 778  | 22 | 0.0353896  |
| 0.0726888 | 1 | 618  | 18 | 0.0461238  |
| 0.0825882 | 1 | 702  | 15 | 0.0220865  |
| 0.179749  | 1 | 1532 | 35 | 0.0137798  |
| 0.0703529 | 1 | 598  | 17 | 0.0452852  |
| 0.069743  | 1 | 597  | 16 | 0.0470507  |
| 0.0602554 | 1 | 604  | 11 | 0.0435727  |
| 0.227555  | 1 | 1939 | 44 | 0.0171342  |
| 0.0816398 | 1 | 703  | 20 | 0.0434756  |
| 0.071194  | 1 | 607  | 17 | 0.0498579  |
| 0.103412  | 1 | 879  | 20 | 0.0332445  |
| 0.0821725 | 1 | 702  | 14 | 0.0271005  |
| 0.241973  | 1 | 2065 | 48 | 0.00148303 |
| 0.203643  | 1 | 1733 | 48 | 0.0131177  |
| 0.0197975 | 1 | 661  | 19 | 0.0470949  |
| 0.0459155 | 1 | 661  | 19 | 0.0470949  |
| 0.218118  | 1 | 1854 | 52 | 0.0180788  |

|           |   |      |    |            |
|-----------|---|------|----|------------|
| 0.0495294 | 1 | 421  | 12 | 0.0459826  |
| 0.117398  | 1 | 1000 | 25 | 0.0200208  |
| 0.139412  | 1 | 1185 | 33 | 0.0328119  |
| 0.173529  | 1 | 1475 | 41 | 0.0138945  |
| 0.100941  | 1 | 858  | 25 | 0.0438728  |
| 0.0695294 | 1 | 591  | 17 | 0.0450292  |
| 0.100986  | 1 | 860  | 15 | 0.0233665  |
| 0.0407468 | 1 | 347  | 10 | 0.0356014  |
| 0.309059  | 1 | 2627 | 73 | 0.00571141 |
| 0.0812941 | 1 | 691  | 16 | 0.0457796  |
| 0.0476617 | 1 | 691  | 16 | 0.0457796  |
| 0.194471  | 1 | 1653 | 46 | 0.0260412  |
| 0.0473493 | 1 | 702  | 17 | 0.0387175  |
| 0.0696471 | 1 | 592  | 17 | 0.0467682  |
| 0.114235  | 1 | 971  | 27 | 0.026306   |
| 0.0520317 | 1 | 598  | 17 | 0.0484102  |
| 0.0846602 | 1 | 973  | 28 | 0.0374464  |
| 0.0876264 | 1 | 745  | 21 | 0.0348599  |
| 0.109176  | 1 | 928  | 21 | 0.0484013  |
| 0.0982353 | 1 | 835  | 24 | 0.0382585  |
| 0.0754118 | 1 | 641  | 18 | 0.0348687  |
| 0.0915294 | 1 | 778  | 22 | 0.0330061  |
| 0.0695294 | 1 | 591  | 14 | 0.0419749  |
| 0.0782802 | 1 | 670  | 19 | 0.0270299  |
| 0.0996471 | 1 | 847  | 18 | 0.0361929  |
| 0.177765  | 1 | 1511 | 35 | 0.0250702  |
| 0.269294  | 1 | 2289 | 57 | 0.00475804 |
| 0.0761176 | 1 | 647  | 18 | 0.0498932  |
| 0.0709437 | 1 | 857  | 20 | 0.0451528  |
| 0.0906873 | 1 | 1078 | 30 | 0.0189439  |
| 0.066     | 1 | 561  | 12 | 0.0474656  |
| 0.184824  | 1 | 1571 | 31 | 0.00609982 |
| 0.178235  | 1 | 1515 | 32 | 0.0140887  |
| 0.144     | 1 | 1224 | 33 | 0.00857153 |
| 0.108108  | 1 | 920  | 25 | 0.0349394  |
| 0.0910588 | 1 | 774  | 21 | 0.0317703  |
| 0.0691765 | 1 | 588  | 17 | 0.0441553  |
| 0.0736534 | 1 | 629  | 18 | 0.0285041  |
| 0.0808235 | 1 | 687  | 17 | 0.0268798  |
| 0.0712941 | 1 | 606  | 17 | 0.0407126  |
| 0.0676522 | 1 | 778  | 18 | 0.0333681  |
| 0.0389739 | 1 | 591  | 17 | 0.0487898  |
| 0.0695294 | 1 | 591  | 17 | 0.0487898  |
| 0.060464  | 1 | 516  | 10 | 0.0491605  |
| 0.110118  | 1 | 936  | 26 | 0.0181847  |
| 0.0984706 | 1 | 837  | 23 | 0.0185555  |
| 0.0833333 | 1 | 771  | 22 | 0.0285041  |

|           |          |      |    |            |
|-----------|----------|------|----|------------|
| 0.0741176 | 1        | 630  | 18 | 0.0485602  |
| 0.0756471 | 1        | 643  | 18 | 0.0445967  |
| 0.074     | 1        | 629  | 18 | 0.0377906  |
| 0.0675294 | 1        | 574  | 16 | 0.0370138  |
| 0.0763529 | 1        | 649  | 18 | 0.0406243  |
| 0.0722157 | 1        | 616  | 12 | 0.0497255  |
| 0.093772  | 1        | 798  | 23 | 0.0220335  |
| 0.0674091 | 1        | 575  | 14 | 0.0386028  |
| 0.100247  | 1        | 853  | 22 | 0.0366695  |
| 0.0747751 | 0.938416 | 682  | 13 | 0.0317614  |
| 0.0723189 | 1        | 615  | 12 | 0.0329532  |
| 0.0985882 | 1        | 838  | 24 | 0.0495401  |
| 0.0704706 | 1        | 599  | 17 | 0.0489486  |
| 0.0598802 | 1        | 510  | 14 | 0.0498932  |
| 0.0616471 | 1        | 524  | 15 | 0.0496901  |
| 0.0702353 | 1        | 597  | 17 | 0.0343214  |
| 0.0737969 | 1        | 641  | 18 | 0.0481718  |
| 0.0752941 | 1        | 640  | 18 | 0.0430077  |
| 0.168588  | 1        | 1433 | 38 | 0.0346745  |
| 0.0787059 | 1        | 669  | 14 | 0.0240462  |
| 0.105686  | 1        | 933  | 27 | 0.0275242  |
| 0.0867059 | 1        | 737  | 19 | 0.0474126  |
| 0.0536471 | 1        | 456  | 13 | 0.0461856  |
| 0.0687059 | 0.98983  | 590  | 17 | 0.0222807  |
| 0.101294  | 1        | 861  | 20 | 0.0338624  |
| 0.0681176 | 1        | 579  | 17 | 0.0429106  |
| 0.076     | 1        | 646  | 18 | 0.0232341  |
| 0.105647  | 1        | 898  | 24 | 0.0468742  |
| 0.191412  | 1        | 1627 | 45 | 0.00565844 |
| 0.0445722 | 1        | 721  | 14 | 0.0296693  |
| 0.0545882 | 1        | 464  | 13 | 0.0445525  |
| 0.0449306 | 1        | 382  | 11 | 0.0453294  |
| 0.0701176 | 1        | 596  | 17 | 0.0392825  |
| 0.102353  | 1        | 870  | 24 | 0.0222807  |
| 0.101882  | 1        | 866  | 22 | 0.00164192 |
| 0.0810153 | 1        | 699  | 20 | 0.0495401  |
| 0.0716716 | 1        | 611  | 17 | 0.0473773  |
| 0.0496027 | 1        | 668  | 17 | 0.0477658  |
| 0.10045   | 1        | 892  | 25 | 0.0371992  |
| 0.0728383 | 1        | 620  | 17 | 0.0498667  |
| 0.0407325 | 1        | 347  | 10 | 0.0489575  |
| 0.05      | 1        | 425  | 11 | 0.0455147  |
| 0.124     | 1        | 1054 | 30 | 0.0131707  |
| 0.0730174 | 1        | 627  | 14 | 0.0312053  |
| 0.0806314 | 1        | 756  | 21 | 0.0258647  |
| 0.243059  | 1        | 2066 | 52 | 0.0131089  |
| 0.131294  | 1        | 1116 | 27 | 0.0223336  |

|           |          |      |    |            |
|-----------|----------|------|----|------------|
| 0.0829222 | 1        | 706  | 15 | 0.0384615  |
| 0.0830588 | 1        | 706  | 15 | 0.0384615  |
| 0.0833813 | 1        | 725  | 20 | 0.0352748  |
| 0.0922466 | 1        | 790  | 22 | 0.025335   |
| 0.0686595 | 1        | 588  | 17 | 0.0439964  |
| 0.079408  | 1        | 676  | 19 | 0.0332092  |
| 0.141783  | 1        | 1207 | 34 | 0.0170813  |
| 0.0746932 | 1        | 639  | 18 | 0.039512   |
| 0.072706  | 1        | 622  | 17 | 0.0466093  |
| 0.0742638 | 1        | 638  | 15 | 0.0388146  |
| 0.0720742 | 1        | 614  | 17 | 0.0495401  |
| 0.0677946 | 1        | 581  | 16 | 0.0450292  |
| 0.0556433 | 1        | 846  | 14 | 0.0497078  |
| 0.0547112 | 1        | 846  | 14 | 0.0497078  |
| 0.126159  | 1        | 1075 | 27 | 0.0306845  |
| 0.0387597 | 1        | 695  | 19 | 0.048622   |
| 0.0359155 | 1        | 644  | 18 | 0.0299165  |
| 0.0701055 | 1        | 598  | 17 | 0.0426193  |
| 0.0718732 | 1        | 612  | 16 | 0.0462739  |
| 0.0744706 | 1        | 633  | 17 | 0.0324853  |
| 0.117059  | 1        | 995  | 27 | 0.0261471  |
| 0.0654118 | 1        | 556  | 12 | 0.0486573  |
| 0.0970323 | 1        | 873  | 24 | 0.0469536  |
| 0.0656471 | 0.827893 | 674  | 13 | 0.013868   |
| 0.0638918 | 1        | 548  | 16 | 0.044632   |
| 0.0765933 | 1        | 661  | 17 | 0.0442347  |
| 0.0890588 | 1        | 757  | 22 | 0.039106   |
| 0.0720028 | 1        | 618  | 17 | 0.0470949  |
| 0.105588  | 1        | 924  | 23 | 0.0223778  |
| 0.0404369 | 1        | 585  | 16 | 0.0473509  |
| 0.0414776 | 1        | 585  | 16 | 0.0473509  |
| 0.09      | 1        | 765  | 21 | 0.0377112  |
| 0.0631765 | 1        | 537  | 15 | 0.0464416  |
| 0.090962  | 1        | 782  | 18 | 0.0324147  |
| 0.092     | 1        | 782  | 18 | 0.0324147  |
| 0.0511714 | 1        | 723  | 20 | 0.0476775  |
| 0.0718824 | 1        | 611  | 17 | 0.0421868  |
| 0.130286  | 1        | 1140 | 30 | 0.00646175 |
| 0.0369531 | 1        | 522  | 14 | 0.048622   |
| 0.0614118 | 1        | 522  | 14 | 0.048622   |
| 0.0658473 | 1        | 584  | 14 | 0.0366607  |
| 0.111412  | 1        | 947  | 23 | 0.0389912  |
| 0.147176  | 1        | 1251 | 34 | 0.0183966  |
| 0.0824706 | 1        | 701  | 20 | 0.0429106  |
| 0.148706  | 1        | 1264 | 35 | 0.018529   |
| 0.104471  | 1        | 888  | 25 | 0.0300224  |
| 0.0670588 | 1        | 570  | 12 | 0.0209036  |

|            |           |      |    |             |
|------------|-----------|------|----|-------------|
| 0.0745834  | 1         | 640  | 14 | 0.036749    |
| 0.173412   | 1         | 1474 | 40 | 0.0120849   |
| 0.130941   | 0.768646  | 1448 | 34 | 0.010955    |
| 0.124235   | 1         | 1056 | 30 | 0.0170813   |
| 0.0801177  | 1         | 681  | 19 | 0.0495489   |
| 0.109882   | 1         | 934  | 26 | 0.034904    |
| 0.0688235  | 1         | 585  | 17 | 0.0394944   |
| 0.0592941  | 1         | 504  | 13 | 0.036952    |
| 0.0550967  | 1         | 914  | 20 | 0.0228986   |
| 0.0704706  | 1         | 599  | 17 | 0.0351071   |
| 0.0670588  | 1         | 570  | 16 | 0.0414982   |
| 0.0828235  | 1         | 704  | 20 | 0.0315231   |
| 0.00611765 | 0.0457344 | 1137 | 23 | 0.00874808  |
| 0.327882   | 1         | 2787 | 76 | 0.018017    |
| 0.160706   | 1         | 1366 | 38 | 0.00570258  |
| 0.163882   | 1         | 1393 | 34 | 0.00798891  |
| 0.114235   | 1         | 971  | 23 | 0.0261913   |
| 0.0955294  | 1         | 812  | 21 | 0.0156512   |
| 0.0771765  | 1         | 656  | 18 | 0.040792    |
| 0.0907059  | 1         | 771  | 22 | 0.0399093   |
| 0.101412   | 1         | 862  | 24 | 0.0458943   |
| 0.0812941  | 1         | 691  | 19 | 0.0351512   |
| 0.0835294  | 1         | 710  | 20 | 0.0322028   |
| 0.056895   | 1         | 623  | 17 | 0.0488515   |
| 0.0732941  | 1         | 623  | 17 | 0.0488515   |
| 0.0576499  | 1         | 497  | 12 | 0.049902    |
| 0.137571   | 1         | 1186 | 33 | 0.013868    |
| 0.0827059  | 1         | 703  | 20 | 0.0382673   |
| 0.0695294  | 1         | 591  | 13 | 0.034701    |
| 0.151882   | 1         | 1291 | 36 | 0.000423721 |
| 0.0864706  | 1         | 735  | 21 | 0.0353807   |
| 0.0901099  | 1         | 779  | 19 | 0.0320351   |
| 0.0581198  | 1         | 821  | 18 | 0.017814    |
| 0.0821176  | 1         | 698  | 13 | 0.030658    |
| 0.0789443  | 1         | 676  | 19 | 0.0469713   |
| 0.0699145  | 1         | 597  | 14 | 0.0456825   |
| 0.0456658  | 1         | 452  | 15 | 0.0339154   |
| 0.0982017  | 1         | 972  | 61 | 0.0251231   |
| 0.0792079  | 1         | 784  | 48 | 0.0499197   |
| 0.066074   | 0.996951  | 656  | 16 | 0.0396974   |
| 0.11837    | 1         | 1165 | 75 | 0.0355661   |
| 0.159294   | 1         | 1354 | 37 | 0.00876573  |
| 0.0950588  | 1         | 808  | 23 | 0.0140093   |
| 0.118228   | 1         | 1017 | 17 | 0.0160485   |
| 0.0738824  | 1         | 628  | 18 | 0.0305874   |
| 0.127371   | 1         | 1088 | 26 | 0.0172755   |
| 0.105412   | 1         | 896  | 22 | 0.00827139  |

|           |          |      |    |            |
|-----------|----------|------|----|------------|
| 0.0601787 | 0.403785 | 1268 | 35 | 0.0234724  |
| 0.070992  | 1        | 604  | 10 | 0.0298724  |
| 0.0663164 | 1        | 568  | 16 | 0.0459031  |
| 0.0763465 | 1        | 988  | 25 | 0.0497519  |
| 0.144691  | 1        | 1443 | 58 | 0.0370403  |
| 0.0869412 | 1        | 739  | 21 | 0.0361399  |
| 0.0865238 | 1        | 739  | 21 | 0.0361399  |
| 0.0628235 | 1        | 534  | 24 | 0.0448791  |
| 0.105176  | 1        | 894  | 48 | 0.019041   |
| 0.0722353 | 1        | 614  | 19 | 0.0436963  |
| 0.0708235 | 1        | 602  | 16 | 0.0160838  |
| 0.0935294 | 1        | 795  | 22 | 0.0345333  |
| 0.106148  | 0.99568  | 926  | 25 | 0.0383379  |
| 0.0709161 | 1        | 603  | 17 | 0.0465652  |
| 0.074     | 1        | 629  | 11 | 0.0255557  |
| 0.0693777 | 1        | 592  | 11 | 0.0410745  |
| 0.0861176 | 1        | 732  | 21 | 0.031938   |
| 0.0883529 | 1        | 751  | 14 | 0.0481453  |
| 0.10798   | 1        | 1069 | 30 | 0.0373581  |
| 0.0791765 | 1        | 673  | 18 | 0.0413305  |
| 0.111988  | 1        | 1008 | 24 | 0.0203033  |
| 0.0691765 | 1        | 588  | 17 | 0.048675   |
| 0.0388882 | 1        | 589  | 17 | 0.0229869  |
| 0.042596  | 1        | 657  | 18 | 0.0183171  |
| 0.0579212 | 1        | 657  | 18 | 0.0183171  |
| 0.120042  | 1        | 1029 | 26 | 0.0163574  |
| 0.0715294 | 1        | 608  | 15 | 0.0449762  |
| 0.108824  | 1        | 925  | 26 | 0.0389559  |
| 0.0836471 | 0.906888 | 784  | 21 | 0.0348864  |
| 0.0893797 | 1        | 781  | 22 | 0.0353542  |
| 0.0641868 | 1        | 547  | 15 | 0.0493989  |
| 0.0987059 | 1        | 839  | 23 | 0.0387175  |
| 0.0961176 | 1        | 817  | 23 | 0.0445172  |
| 0.108369  | 1        | 922  | 23 | 0.0374817  |
| 0.0772941 | 1        | 657  | 19 | 0.0396533  |
| 0.0853475 | 1        | 738  | 21 | 0.0351512  |
| 0.0699665 | 1        | 605  | 17 | 0.0486485  |
| 0.081678  | 1        | 699  | 20 | 0.0438287  |
| 0.0756471 | 1        | 643  | 15 | 0.0201886  |
| 0.0722679 | 1        | 615  | 17 | 0.0475716  |
| 0.0693348 | 1        | 615  | 17 | 0.0475716  |
| 0.0964656 | 1        | 827  | 23 | 0.0308964  |
| 0.0722353 | 1        | 614  | 12 | 0.043149   |
| 0.0778539 | 1        | 682  | 15 | 0.0246641  |
| 0.0517175 | 1        | 539  | 15 | 0.0466005  |
| 0.136235  | 1        | 1158 | 32 | 0.00894229 |
| 0.109524  | 1        | 943  | 24 | 0.0389294  |

|           |         |      |    |            |
|-----------|---------|------|----|------------|
| 0.300353  | 1       | 2553 | 68 | 0.0149891  |
| 0.0892941 | 1       | 759  | 15 | 0.0435285  |
| 0.108588  | 1       | 923  | 26 | 0.0263943  |
| 0.0825882 | 1       | 702  | 20 | 0.0367578  |
| 0.0753409 | 1       | 641  | 18 | 0.0477922  |
| 0.12741   | 1       | 1084 | 23 | 0.0140976  |
| 0.102235  | 1       | 869  | 20 | 0.0227574  |
| 0.154941  | 1       | 1317 | 31 | 0.00921594 |
| 0.0776471 | 1       | 660  | 19 | 0.0452941  |
| 0.0694118 | 1       | 590  | 11 | 0.0412334  |
| 0.101294  | 1       | 861  | 24 | 0.0150421  |
| 0.0541176 | 1       | 460  | 10 | 0.0464593  |
| 0.208235  | 1       | 1770 | 49 | 0.00864215 |
| 0.080197  | 1       | 684  | 15 | 0.0466976  |
| 0.0727059 | 1       | 618  | 17 | 0.040739   |
| 0.0725267 | 1       | 618  | 18 | 0.0476951  |
| 0.0700733 | 1       | 602  | 17 | 0.0444907  |
| 0.176625  | 1       | 1957 | 50 | 0.00762698 |
| 0.156227  | 1       | 1731 | 46 | 0.0183701  |
| 0.0423529 | 1       | 360  | 10 | 0.0490104  |
| 0.0691773 | 1       | 597  | 13 | 0.041507   |
| 0.0806489 | 1       | 696  | 19 | 0.0491252  |
| 0.0667981 | 1       | 610  | 10 | 0.0379231  |
| 0.0811432 | 1       | 741  | 21 | 0.0450469  |
| 0.0688004 | 1       | 589  | 10 | 0.0446055  |
| 0.103914  | 1       | 892  | 25 | 0.0351159  |
| 0.0923926 | 1       | 787  | 21 | 0.0283187  |
| 0.0537916 | 1       | 781  | 21 | 0.0359898  |
| 0.0715294 | 1       | 608  | 15 | 0.0326089  |
| 0.0704706 | 1       | 599  | 15 | 0.0452411  |
| 0.0848791 | 1       | 723  | 15 | 0.025591   |
| 0.132118  | 1       | 1123 | 27 | 0.0306227  |
| 0.0694118 | 1       | 590  | 13 | 0.0415512  |
| 0.0687059 | 1       | 584  | 16 | 0.0481718  |
| 0.11654   | 1       | 1009 | 27 | 0.0189439  |
| 0.118497  | 1       | 1009 | 27 | 0.0189439  |
| 0.105683  | 1       | 915  | 26 | 0.0239049  |
| 0.107457  | 1       | 915  | 26 | 0.0239049  |
| 0.0807855 | 1       | 687  | 13 | 0.00711499 |
| 0.089907  | 0.97026 | 807  | 18 | 0.0358309  |
| 0.0942867 | 1       | 807  | 18 | 0.0358309  |
| 0.067837  | 1       | 626  | 18 | 0.0472096  |
| 0.10544   | 1       | 973  | 27 | 0.0253968  |
| 0.0812941 | 1       | 691  | 17 | 0.0353542  |
| 0.0665882 | 1       | 566  | 16 | 0.0488692  |
| 0.0725454 | 1       | 631  | 18 | 0.0385145  |
| 0.0892941 | 1       | 759  | 22 | 0.0363782  |

|           |   |      |    |            |
|-----------|---|------|----|------------|
| 0.0789504 | 1 | 674  | 19 | 0.0495401  |
| 0.111163  | 1 | 949  | 29 | 0.0177257  |
| 0.0812878 | 1 | 712  | 20 | 0.0312583  |
| 0.0748795 | 1 | 637  | 18 | 0.0382497  |
| 0.111529  | 1 | 948  | 25 | 0.030146   |
| 0.0912941 | 1 | 776  | 20 | 0.0374022  |
| 0.0648536 | 1 | 682  | 16 | 0.0349923  |
| 0.0762353 | 1 | 648  | 12 | 0.0488427  |
| 0.0676471 | 1 | 575  | 12 | 0.0449762  |
| 0.108     | 1 | 918  | 17 | 0.00913649 |
| 0.0830588 | 1 | 706  | 14 | 0.0208859  |
| 0.0751765 | 1 | 639  | 18 | 0.0424781  |
| 0.0411029 | 1 | 638  | 15 | 0.0310641  |
| 0.0541167 | 1 | 840  | 24 | 0.0498932  |
| 0.0977995 | 1 | 840  | 24 | 0.0498932  |
| 0.127292  | 1 | 1222 | 31 | 0.00843912 |
| 0.0697917 | 1 | 670  | 17 | 0.00935718 |
| 0.0716299 | 1 | 610  | 18 | 0.0181847  |
| 0.251999  | 1 | 2206 | 57 | 0.0171077  |
| 0.0703529 | 1 | 598  | 12 | 0.049443   |
| 0.148118  | 1 | 1259 | 26 | 0.0183701  |
| 0.0751371 | 1 | 644  | 18 | 0.0490987  |
| 0.104471  | 1 | 888  | 25 | 0.0110256  |
| 0.122298  | 1 | 1092 | 30 | 0.0363782  |
| 0.12572   | 1 | 1092 | 30 | 0.0363782  |
| 0.0924956 | 1 | 795  | 20 | 0.0381614  |
| 0.114627  | 1 | 989  | 28 | 0.0138857  |
| 0.123046  | 1 | 1055 | 30 | 0.0209742  |
| 0.123204  | 1 | 1055 | 30 | 0.0209742  |
| 0.0262953 | 1 | 642  | 18 | 0.0472979  |
| 0.177294  | 1 | 1507 | 43 | 0.01039    |
| 0.151412  | 1 | 1287 | 32 | 0.0065412  |
| 0.126824  | 1 | 1078 | 27 | 0.0183436  |
| 0.0841111 | 1 | 721  | 20 | 0.031938   |
| 0.0774147 | 1 | 957  | 26 | 0.02462    |
| 0.11239   | 1 | 957  | 26 | 0.02462    |
| 0.0876703 | 1 | 753  | 21 | 0.0470772  |
| 0.123303  | 1 | 1099 | 30 | 0.025132   |
| 0.134964  | 1 | 1148 | 27 | 0.0154482  |
| 0.034507  | 1 | 442  | 10 | 0.0285041  |
| 0.0673824 | 1 | 590  | 11 | 0.0346922  |
| 0.0710588 | 1 | 604  | 17 | 0.0370844  |
| 0.247487  | 1 | 2117 | 57 | 0.017196   |
| 0.0438673 | 1 | 804  | 22 | 0.0245052  |
| 0.0769231 | 1 | 662  | 19 | 0.0429812  |
| 0.0698526 | 1 | 801  | 22 | 0.0387175  |
| 0.0791304 | 1 | 819  | 23 | 0.0242934  |



|           |          |      |     |            |
|-----------|----------|------|-----|------------|
| 0.109082  | 1        | 1129 | 32  | 0.0389206  |
| 0.137248  | 1        | 1171 | 32  | 0.0107872  |
| 0.297234  | 1        | 2536 | 66  | 0.00868629 |
| 0.0802433 | 1        | 686  | 19  | 0.00520824 |
| 0.0773393 | 1        | 686  | 19  | 0.00520824 |
| 0.198971  | 1        | 1701 | 43  | 0.00472273 |
| 0.0780158 | 0.40682  | 1701 | 43  | 0.00472273 |
| 0.225056  | 1        | 1924 | 59  | 0.0039106  |
| 0.0701836 | 1        | 600  | 13  | 0.0319998  |
| 0.0663957 | 1        | 588  | 17  | 0.0462298  |
| 0.111294  | 1        | 946  | 34  | 0.0043608  |
| 0.0948235 | 1        | 806  | 18  | 0.00293074 |
| 0.272     | 0.769641 | 3004 | 94  | 0.00416659 |
| 0.342822  | 1        | 4974 | 155 | 0.00334563 |
| 0.111724  | 1        | 1621 | 41  | 0.00994862 |
| 0.0711765 | 1        | 605  | 17  | 0.0422839  |
| 0.0848235 | 1        | 721  | 19  | 0.0493459  |
| 0.0884706 | 1        | 752  | 20  | 0.0353189  |
| 0.0457848 | 1        | 586  | 12  | 0.0481895  |
| 0.137176  | 1        | 1166 | 38  | 0.0255204  |
| 0.0772941 | 1        | 657  | 15  | 0.0337653  |

| Fraction of negatively enriched windows in region | MAT-score on T(H3K9me3WTC vs. control) |
|---------------------------------------------------|----------------------------------------|
| 0                                                 | 5.91723                                |
| 0                                                 | 7.13257                                |
| 0                                                 | 5.54136                                |
| 0                                                 | 6.11453                                |
| 0                                                 | 5.71992                                |
| 0                                                 | 13.0401                                |
| 0                                                 | 6.1713                                 |
| 0                                                 | 6.62624                                |
| 0                                                 | 7.14767                                |
| 0                                                 | 5.51391                                |
| 0                                                 | 5.53459                                |
| 0                                                 | 5.84492                                |
| 0                                                 | 5.44506                                |
| 0                                                 | 6.60752                                |
| 0                                                 | 6.45673                                |
| 0                                                 | 6.45673                                |
| 0                                                 | 6.06555                                |
| 0                                                 | 6.17813                                |
| 0                                                 | 8.6572                                 |
| 0                                                 | 6.18492                                |
| 0                                                 | 5.69844                                |
| 0                                                 | 6.2555                                 |
| 0                                                 | 6.38844                                |
| 0                                                 | 6.30242                                |
| 0                                                 | 5.69311                                |
| 0                                                 | 6.88168                                |
| 0                                                 | 6.88168                                |
| 0                                                 | 5.6715                                 |
| 0                                                 | 6.18905                                |
| 0                                                 | 5.59131                                |
| 0                                                 | 5.937                                  |
| 0                                                 | 5.68858                                |
| 0                                                 | 5.99631                                |
| 0                                                 | 5.58134                                |
| 0                                                 | 6.02129                                |
| 0                                                 | 5.45963                                |
| 0                                                 | 5.65584                                |
| 0                                                 | 6.10145                                |
| 0                                                 | 6.24265                                |
| 0                                                 | 6.28223                                |
| 0                                                 | 6.54585                                |
| 0                                                 | 10.782                                 |
| 0                                                 | 6.70962                                |
| 0                                                 | 6.47788                                |

|   |         |
|---|---------|
| 0 | 7.28926 |
| 0 | 7.28926 |
| 0 | 6.36775 |
| 0 | 5.47357 |
| 0 | 14.9487 |
| 0 | 5.5413  |
| 0 | 7.41733 |
| 0 | 6.14046 |
| 0 | 6.28694 |
| 0 | 6.28694 |
| 0 | 5.43442 |
| 0 | 5.63442 |
| 0 | 18.0562 |
| 0 | 7.2017  |
| 0 | 5.84008 |
| 0 | 6.08404 |
| 0 | 5.80025 |
| 0 | 5.50419 |
| 0 | 5.52403 |
| 0 | 6.7161  |
| 0 | 5.9506  |
| 0 | 5.8079  |
| 0 | 7.08898 |
| 0 | 6.23924 |
| 0 | 5.54573 |
| 0 | 5.68961 |
| 0 | 8.33385 |
| 0 | 6.1587  |
| 0 | 5.64673 |
| 0 | 6.2676  |
| 0 | 5.51575 |
| 0 | 6.37528 |
| 0 | 6.17006 |
| 0 | 9.15832 |
| 0 | 7.02399 |
| 0 | 5.61713 |
| 0 | 5.47302 |
| 0 | 6.22415 |
| 0 | 7.00685 |
| 0 | 5.52227 |
| 0 | 7.5436  |
| 0 | 6.31844 |
| 0 | 5.98067 |
| 0 | 8.0108  |
| 0 | 5.49668 |
| 0 | 5.55183 |
| 0 | 5.55183 |

|   |         |
|---|---------|
| 0 | 8.42121 |
| 0 | 5.98782 |
| 0 | 5.5772  |
| 0 | 5.55677 |
| 0 | 8.34611 |
| 0 | 8.34611 |
| 0 | 6.39094 |
| 0 | 7.20574 |
| 0 | 8.21174 |
| 0 | 7.4411  |
| 0 | 6.0702  |
| 0 | 6.3882  |
| 0 | 5.77689 |
| 0 | 7.101   |
| 0 | 7.15148 |
| 0 | 6.2118  |
| 0 | 7.31935 |
| 0 | 8.20082 |
| 0 | 10.238  |
| 0 | 5.70836 |
| 0 | 5.66314 |
| 0 | 6.16127 |
| 0 | 5.86793 |
| 0 | 6.36058 |
| 0 | 5.52817 |
| 0 | 6.0513  |
| 0 | 6.83782 |
| 0 | 5.53953 |
| 0 | 5.43929 |
| 0 | 6.37394 |
| 0 | 6.62592 |
| 0 | 6.0141  |
| 0 | 14.0836 |
| 0 | 6.07354 |
| 0 | 6.12779 |
| 0 | 6.01197 |
| 0 | 10.7322 |
| 0 | 10.1008 |
| 0 | 5.62339 |
| 0 | 7.76403 |
| 0 | 7.76403 |
| 0 | 5.5439  |
| 0 | 7.52756 |
| 0 | 5.92783 |
| 0 | 8.02992 |
| 0 | 15.2805 |
| 0 | 9.13755 |

|   |         |
|---|---------|
| 0 | 15.0259 |
| 0 | 6.0118  |
| 0 | 13.1998 |
| 0 | 7.22672 |
| 0 | 7.18861 |
| 0 | 12.3782 |
| 0 | 13.2343 |
| 0 | 5.91691 |
| 0 | 7.72839 |
| 0 | 8.31728 |
| 0 | 9.46124 |
| 0 | 7.03654 |
| 0 | 7.38686 |
| 0 | 6.13381 |
| 0 | 11.066  |
| 0 | 5.66144 |
| 0 | 9.15004 |
| 0 | 7.88646 |
| 0 | 10.0309 |
| 0 | 9.6081  |
| 0 | 9.01801 |
| 0 | 5.61105 |
| 0 | 11.1516 |
| 0 | 15.1586 |
| 0 | 8.77329 |
| 0 | 7.28831 |
| 0 | 5.6433  |
| 0 | 10.0394 |
| 0 | 11.3054 |
| 0 | 14.043  |
| 0 | 11.055  |
| 0 | 13.1698 |
| 0 | 5.79565 |
| 0 | 9.74944 |
| 0 | 9.21407 |
| 0 | 9.14556 |
| 0 | 11.0735 |
| 0 | 8.43476 |
| 0 | 8.12301 |
| 0 | 6.80584 |
| 0 | 6.21307 |
| 0 | 8.65015 |
| 0 | 6.03315 |
| 0 | 9.07024 |
| 0 | 6.22752 |
| 0 | 5.84072 |
| 0 | 10.0155 |

|          |         |
|----------|---------|
| 0        | 5.47811 |
| 0        | 7.50578 |
| 0        | 8.00245 |
| 0        | 10.2203 |
| 0        | 9.22783 |
| 0        | 7.46394 |
| 0        | 6.18338 |
| 0        | 6.00313 |
| 0        | 6.09525 |
| 0        | 12.7733 |
| 0        | 8.69738 |
| 0        | 7.01213 |
| 0        | 19.451  |
| 0        | 5.71348 |
| 0        | 6.68517 |
| 0        | 5.50847 |
| 0        | 9.47734 |
| 0        | 6.41707 |
| 0        | 10.0013 |
| 0        | 6.02971 |
| 0        | 6.02971 |
| 0        | 5.59802 |
| 0        | 5.48507 |
| 0.266667 | 11.2176 |
| 0        | 5.55924 |
| 0        | 6.59308 |
| 0        | 6.84226 |
| 0        | 6.44589 |
| 0        | 5.64418 |
| 0        | 5.96047 |
| 0        | 5.70074 |
| 0        | 5.86404 |
| 0        | 6.26764 |
| 0        | 6.26764 |
| 0        | 7.18945 |
| 0        | 7.18945 |
| 0        | 5.53853 |
| 0        | 5.91369 |
| 0        | 7.25585 |
| 0        | 5.53447 |
| 0        | 7.08089 |
| 0        | 5.63409 |
| 0        | 9.07298 |
| 0        | 9.07298 |
| 0        | 5.67726 |
| 0        | 11.5961 |
| 0        | 6.00074 |

|   |         |
|---|---------|
| 0 | 6.20589 |
| 0 | 6.20589 |
| 0 | 6.18268 |
| 0 | 7.05873 |
| 0 | 5.54629 |
| 0 | 7.18151 |
| 0 | 5.62524 |
| 0 | 5.70739 |
| 0 | 6.00585 |
| 0 | 6.37499 |
| 0 | 7.92279 |
| 0 | 5.52953 |
| 0 | 6.47388 |
| 0 | 7.61658 |
| 0 | 5.57051 |
| 0 | 7.1928  |
| 0 | 5.46205 |
| 0 | 8.72963 |
| 0 | 6.02012 |
| 0 | 6.33713 |
| 0 | 11.5169 |
| 0 | 6.30783 |
| 0 | 6.06674 |
| 0 | 8.12739 |
| 0 | 6.03025 |
| 0 | 6.02432 |
| 0 | 7.23183 |
| 0 | 6.08546 |
| 0 | 12.8036 |
| 0 | 7.36615 |
| 0 | 14.1419 |
| 0 | 5.48454 |
| 0 | 6.76745 |
| 0 | 5.57164 |
| 0 | 6.05269 |
| 0 | 6.17611 |
| 0 | 6.06283 |
| 0 | 5.44859 |
| 0 | 5.687   |
| 0 | 9.09074 |
| 0 | 6.01099 |
| 0 | 6.5753  |
| 0 | 8.20509 |
| 0 | 5.50732 |
| 0 | 7.36709 |
| 0 | 5.58055 |
| 0 | 6.05095 |

|   |         |
|---|---------|
| 0 | 9.24597 |
| 0 | 11.402  |
| 0 | 6.46089 |
| 0 | 6.05882 |
| 0 | 5.8697  |
| 0 | 5.45141 |
| 0 | 5.49496 |
| 0 | 5.62606 |
| 0 | 5.85333 |
| 0 | 6.06092 |
| 0 | 5.50847 |
| 0 | 7.74755 |
| 0 | 6.15029 |
| 0 | 6.41344 |
| 0 | 5.91339 |
| 0 | 5.45551 |
| 0 | 5.66844 |
| 0 | 7.06937 |
| 0 | 6.40596 |
| 0 | 5.43956 |
| 0 | 5.53014 |
| 0 | 5.86141 |
| 0 | 8.03529 |
| 0 | 6.10567 |
| 0 | 6.37353 |
| 0 | 5.4896  |
| 0 | 6.50362 |
| 0 | 6.15224 |
| 0 | 5.57298 |
| 0 | 11.0746 |
| 0 | 7.16671 |
| 0 | 5.57934 |
| 0 | 5.43347 |
| 0 | 6.00823 |
| 0 | 5.45482 |
| 0 | 5.57263 |
| 0 | 11.2736 |
| 0 | 5.673   |
| 0 | 5.77025 |
| 0 | 7.10785 |
| 0 | 5.70309 |
| 0 | 11.1409 |
| 0 | 11.1409 |
| 0 | 5.84013 |
| 0 | 6.90347 |
| 0 | 7.02315 |
| 0 | 6.27092 |



|   |         |
|---|---------|
| 0 | 6.09584 |
| 0 | 6.18866 |
| 0 | 7.06053 |
| 0 | 5.53554 |
| 0 | 8.08535 |
| 0 | 6.32084 |
| 0 | 6.11898 |
| 0 | 5.44566 |
| 0 | 5.78453 |
| 0 | 11.4008 |
| 0 | 5.48494 |
| 0 | 5.5444  |
| 0 | 5.65026 |
| 0 | 6.14803 |
| 0 | 5.54661 |
| 0 | 9.65497 |
| 0 | 6.05647 |
| 0 | 5.52414 |
| 0 | 6.22487 |
| 0 | 5.74316 |
| 0 | 13.121  |
| 0 | 5.61593 |
| 0 | 5.60047 |
| 0 | 6.0423  |
| 0 | 17.1197 |
| 0 | 5.50533 |
| 0 | 5.52029 |
| 0 | 5.84622 |
| 0 | 8.25493 |
| 0 | 6.06071 |
| 0 | 8.64974 |
| 0 | 6.64748 |
| 0 | 12.536  |
| 0 | 12.536  |
| 0 | 8.62066 |
| 0 | 8.62066 |
| 0 | 7.22002 |
| 0 | 6.14922 |
| 0 | 6.14922 |
| 0 | 7.60944 |
| 0 | 7.25301 |
| 0 | 6.50714 |
| 0 | 11.9564 |
| 0 | 6.28174 |
| 0 | 6.28052 |
| 0 | 5.59499 |
| 0 | 5.59499 |

|   |         |
|---|---------|
| 0 | 7.05679 |
| 0 | 6.35507 |
| 0 | 6.09837 |
| 0 | 6.07894 |
| 0 | 6.49073 |
| 0 | 6.07991 |
| 0 | 6.23128 |
| 0 | 5.50812 |
| 0 | 9.06874 |
| 0 | 6.00858 |
| 0 | 6.41703 |
| 0 | 5.44889 |
| 0 | 5.83297 |
| 0 | 6.32144 |
| 0 | 7.34229 |
| 0 | 6.55228 |
| 0 | 6.67886 |
| 0 | 6.3311  |
| 0 | 7.31721 |
| 0 | 6.1204  |
| 0 | 6.17396 |
| 0 | 8.13216 |
| 0 | 6.40106 |
| 0 | 6.07223 |
| 0 | 6.97939 |
| 0 | 7.18691 |
| 0 | 9.29042 |
| 0 | 8.71655 |
| 0 | 7.13619 |
| 0 | 7.20652 |
| 0 | 10.3812 |
| 0 | 11.022  |
| 0 | 6.17946 |
| 0 | 6.00678 |
| 0 | 5.6457  |
| 0 | 8.04757 |
| 0 | 5.44483 |
| 0 | 6.32545 |
| 0 | 7.2095  |
| 0 | 5.68096 |
| 0 | 5.56195 |
| 0 | 6.68351 |
| 0 | 5.90632 |
| 0 | 5.90632 |
| 0 | 6.13569 |
| 0 | 7.58747 |
| 0 | 5.788   |

|   |         |
|---|---------|
| 0 | 7.28332 |
| 0 | 7.06856 |
| 0 | 5.85638 |
| 0 | 6.70487 |
| 0 | 8.14892 |
| 0 | 7.26554 |
| 0 | 5.99675 |
| 0 | 5.79014 |
| 0 | 6.45675 |
| 0 | 6.45675 |
| 0 | 7.64913 |
| 0 | 6.35454 |
| 0 | 6.12207 |
| 0 | 6.40845 |
| 0 | 5.98247 |
| 0 | 5.49674 |
| 0 | 6.22747 |
| 0 | 6.22747 |
| 0 | 5.84979 |
| 0 | 5.48219 |
| 0 | 9.30299 |
| 0 | 5.6302  |
| 0 | 7.23914 |
| 0 | 5.59842 |
| 0 | 8.21258 |
| 0 | 6.17077 |
| 0 | 13.9661 |
| 0 | 7.62159 |
| 0 | 5.56213 |
| 0 | 7.19354 |
| 0 | 5.55721 |
| 0 | 5.5356  |
| 0 | 7.37    |
| 0 | 5.70997 |
| 0 | 6.34068 |
| 0 | 5.73093 |
| 0 | 7.60723 |
| 0 | 5.79363 |
| 0 | 5.48214 |
| 0 | 5.48399 |
| 0 | 5.55613 |
| 0 | 5.66577 |
| 0 | 5.6202  |
| 0 | 5.67461 |
| 0 | 6.15076 |
| 0 | 5.54976 |
| 0 | 9.01201 |

|   |         |
|---|---------|
| 0 | 8.3548  |
| 0 | 9.03773 |
| 0 | 5.88237 |
| 0 | 5.68344 |
| 0 | 5.51113 |
| 0 | 6.09989 |
| 0 | 5.75803 |
| 0 | 7.02526 |
| 0 | 5.58343 |
| 0 | 8.2188  |
| 0 | 5.68121 |
| 0 | 5.59401 |
| 0 | 5.62166 |
| 0 | 7.5804  |
| 0 | 6.0725  |
| 0 | 5.72296 |
| 0 | 5.49443 |
| 0 | 6.0593  |
| 0 | 10.6838 |
| 0 | 5.55499 |
| 0 | 6.18766 |
| 0 | 7.13759 |
| 0 | 7.0545  |
| 0 | 5.44765 |
| 0 | 5.77736 |
| 0 | 5.45626 |
| 0 | 8.02505 |
| 0 | 9.22756 |
| 0 | 6.00124 |
| 0 | 8.4057  |
| 0 | 5.67467 |
| 0 | 5.68221 |
| 0 | 5.963   |
| 0 | 7.25481 |
| 0 | 5.62704 |
| 0 | 7.07461 |
| 0 | 5.56986 |
| 0 | 6.14741 |
| 0 | 6.14741 |
| 0 | 5.67634 |
| 0 | 5.49162 |
| 0 | 6.16809 |
| 0 | 6.58624 |
| 0 | 8.18235 |
| 0 | 5.45884 |
| 0 | 5.62926 |
| 0 | 5.61016 |

|      |         |
|------|---------|
| 0    | 5.73227 |
| 0    | 5.52219 |
| 0    | 5.88688 |
| 0    | 5.4632  |
| 0    | 5.50108 |
| 0    | 5.52163 |
| 0    | 6.01306 |
| 0    | 6.16937 |
| 0    | 7.30742 |
| 0    | 6.06563 |
| 0    | 6.67573 |
| 0    | 5.89874 |
| 0    | 5.57645 |
| 0    | 6.00074 |
| 0    | 7.21492 |
| 0    | 7.14998 |
| 0    | 5.5437  |
| 0    | 9.29154 |
| 0    | 7.05706 |
| 0    | 7.00734 |
| 0    | 6.02    |
| 0    | 5.56715 |
| 0    | 8.55754 |
| 0    | 6.00381 |
| 0    | 5.4459  |
| 0    | 5.46103 |
| 0    | 5.51608 |
| 0    | 5.92154 |
| 0    | 8.20123 |
| 0    | 5.48135 |
| 0    | 8.0221  |
| 0    | 5.55158 |
| 0    | 7.10061 |
| 0    | 5.7188  |
| 0    | 6.61703 |
| 0    | 6.96503 |
| 0    | 13.221  |
| 0    | 7.30493 |
| 0    | 5.81319 |
| 0    | 7.64859 |
| 0    | 5.72718 |
| 0    | 11.0265 |
| 0    | 5.45989 |
| 0    | 5.77286 |
| 0.25 | 6.75048 |
| 0    | 8.10425 |
| 0    | 5.54765 |

|   |         |
|---|---------|
| 0 | 6.47475 |
| 0 | 6.70796 |
| 0 | 6.02305 |
| 0 | 10.301  |
| 0 | 6.26196 |
| 0 | 6.25123 |
| 0 | 6.3323  |
| 0 | 10.3508 |
| 0 | 5.64603 |
| 0 | 5.56245 |
| 0 | 6.10575 |
| 0 | 6.36308 |
| 0 | 11.545  |
| 0 | 5.52684 |
| 0 | 7.06148 |
| 0 | 7.03108 |
| 0 | 5.4354  |
| 0 | 5.57744 |
| 0 | 8.28484 |
| 0 | 7.52138 |
| 0 | 7.2214  |
| 0 | 7.12843 |
| 0 | 6.20682 |
| 0 | 7.36056 |
| 0 | 9.65292 |
| 0 | 8.44213 |
| 0 | 6.29936 |
| 0 | 6.05341 |
| 0 | 6.05341 |
| 0 | 5.43145 |
| 0 | 5.45443 |
| 0 | 6.0047  |
| 0 | 6.16605 |
| 0 | 5.93287 |
| 0 | 5.53656 |
| 0 | 5.44086 |
| 0 | 7.48286 |
| 0 | 14.1409 |
| 0 | 14.1409 |
| 0 | 6.21616 |
| 0 | 5.64641 |
| 0 | 5.62443 |
| 0 | 5.55791 |
| 0 | 5.48474 |
| 0 | 6.32395 |
| 0 | 6.21737 |
| 0 | 6.1227  |

|   |         |
|---|---------|
| 0 | 5.65199 |
| 0 | 5.77638 |
| 0 | 6.03493 |
| 0 | 5.56396 |
| 0 | 5.6762  |
| 0 | 5.6762  |
| 0 | 7.681   |
| 0 | 6.50057 |
| 0 | 5.97183 |
| 0 | 6.17998 |
| 0 | 8.06284 |
| 0 | 6.20708 |
| 0 | 5.72649 |
| 0 | 6.05674 |
| 0 | 6.05674 |
| 0 | 5.52171 |
| 0 | 5.58175 |
| 0 | 6.20584 |
| 0 | 5.73187 |
| 0 | 7.22843 |
| 0 | 6.07588 |
| 0 | 6.60673 |
| 0 | 5.73737 |
| 0 | 6.94111 |
| 0 | 5.74832 |
| 0 | 5.61429 |
| 0 | 5.5675  |
| 0 | 7.01236 |
| 0 | 7.29215 |
| 0 | 6.58085 |
| 0 | 6.12336 |
| 0 | 5.56963 |
| 0 | 6.38636 |
| 0 | 5.48096 |
| 0 | 6.58521 |
| 0 | 5.50051 |
| 0 | 5.74283 |
| 0 | 7.04664 |
| 0 | 5.76531 |
| 0 | 7.89723 |
| 0 | 5.69655 |
| 0 | 6.2959  |
| 0 | 5.73278 |
| 0 | 5.63223 |
| 0 | 6.58711 |
| 0 | 6.55771 |
| 0 | 7.4503  |

|      |         |
|------|---------|
| 0    | 6.28626 |
| 0    | 6.6399  |
| 0    | 6.03178 |
| 0    | 7.54318 |
| 0    | 5.53816 |
| 0    | 7.05287 |
| 0    | 5.66503 |
| 0    | 6.17677 |
| 0    | 6.48568 |
| 0    | 5.93044 |
| 0    | 6.14632 |
| 0    | 7.81824 |
| 0    | 8.05753 |
| 0    | 9.14459 |
| 0    | 6.4508  |
| 0    | 5.69101 |
| 0    | 11.0191 |
| 0    | 6.48036 |
| 0    | 5.56119 |
| 0    | 5.98305 |
| 0    | 7.06235 |
| 0    | 5.52762 |
| 0.25 | 8.028   |
| 0    | 5.69139 |
| 0    | 5.69139 |
| 0    | 5.91889 |
| 0    | 6.07281 |
| 0    | 6.51558 |
| 0    | 5.75021 |
| 0    | 6.01012 |
| 0    | 6.05865 |
| 0    | 6.05865 |
| 0    | 6.24051 |
| 0    | 5.83383 |
| 0    | 5.51153 |
| 0    | 5.44271 |
| 0    | 6.2102  |
| 0    | 5.54143 |
| 0    | 5.52783 |
| 0    | 5.84749 |
| 0    | 5.46476 |
| 0    | 5.76855 |
| 0    | 5.56039 |
| 0    | 6.65881 |
| 0    | 6.68844 |
| 0    | 5.47552 |
| 0    | 5.52209 |



|   |         |
|---|---------|
| 0 | 6.24294 |
| 0 | 5.96302 |
| 0 | 7.03339 |
| 0 | 6.26747 |
| 0 | 6.09327 |
| 0 | 6.57229 |
| 0 | 5.88301 |
| 0 | 7.07964 |
| 0 | 7.03441 |
| 0 | 6.44127 |
| 0 | 6.15787 |
| 0 | 6.32818 |
| 0 | 6.00647 |
| 0 | 5.65649 |
| 0 | 5.70908 |
| 0 | 8.2427  |
| 0 | 5.45741 |
| 0 | 6.29782 |
| 0 | 5.4956  |
| 0 | 7.35752 |
| 0 | 7.02206 |
| 0 | 6.24676 |
| 0 | 5.49694 |
| 0 | 5.77738 |
| 0 | 7.14671 |
| 0 | 6.28404 |
| 0 | 5.86379 |
| 0 | 5.49146 |
| 0 | 6.34361 |
| 0 | 7.16171 |
| 0 | 6.31045 |
| 0 | 5.65012 |
| 0 | 6.07605 |
| 0 | 5.8135  |
| 0 | 8.11827 |
| 0 | 5.95612 |
| 0 | 7.0266  |
| 0 | 5.72176 |
| 0 | 6.50471 |
| 0 | 6.50471 |
| 0 | 8.18649 |
| 0 | 5.50141 |
| 0 | 6.21754 |
| 0 | 5.4907  |
| 0 | 7.00889 |
| 0 | 7.00889 |
| 0 | 5.76543 |

|   |         |
|---|---------|
| 0 | 5.48758 |
| 0 | 5.752   |
| 0 | 6.02357 |
| 0 | 6.6209  |
| 0 | 5.63463 |
| 0 | 10.1777 |
| 0 | 5.49695 |
| 0 | 5.97835 |
| 0 | 7.17592 |
| 0 | 6.32597 |
| 0 | 5.56049 |
| 0 | 5.6898  |
| 0 | 7.77555 |
| 0 | 6.46841 |
| 0 | 5.82561 |
| 0 | 6.32628 |
| 0 | 6.08912 |
| 0 | 5.49603 |
| 0 | 6.63259 |
| 0 | 10.4319 |
| 0 | 6.33094 |
| 0 | 6.33094 |
| 0 | 5.87046 |
| 0 | 6.02636 |
| 0 | 7.50672 |
| 0 | 7.50672 |
| 0 | 5.70319 |
| 0 | 6.91142 |
| 0 | 5.59704 |
| 0 | 6.16656 |
| 0 | 6.17421 |
| 0 | 5.58861 |
| 0 | 6.85993 |
| 0 | 6.85993 |
| 0 | 5.44212 |
| 0 | 5.53785 |
| 0 | 6.39793 |
| 0 | 6.02404 |
| 0 | 5.80942 |
| 0 | 6.24229 |
| 0 | 5.55903 |
| 0 | 6.64847 |
| 0 | 5.60323 |
| 0 | 5.58171 |
| 0 | 5.58171 |
| 0 | 7.10484 |
| 0 | 7.27513 |

|   |         |
|---|---------|
| 0 | 6.08197 |
| 0 | 10.4491 |
| 0 | 5.43947 |
| 0 | 6.3271  |
| 0 | 6.18955 |
| 0 | 6.48501 |
| 0 | 6.18584 |
| 0 | 6.03667 |
| 0 | 6.13556 |
| 0 | 6.30156 |
| 0 | 7.12056 |
| 0 | 6.00943 |
| 0 | 5.46715 |
| 0 | 5.53498 |
| 0 | 5.52866 |
| 0 | 5.67265 |
| 0 | 7.57192 |
| 0 | 5.43697 |
| 0 | 13.1006 |
| 0 | 5.57131 |
| 0 | 6.59291 |
| 0 | 6.3935  |
| 0 | 6.01012 |
| 0 | 5.54973 |
| 0 | 8.44563 |
| 0 | 7.42274 |
| 0 | 5.59061 |
| 0 | 6.12867 |
| 0 | 6.02952 |
| 0 | 5.69168 |
| 0 | 6.07155 |
| 0 | 6.17664 |
| 0 | 7.39158 |
| 0 | 6.65865 |
| 0 | 6.88769 |
| 0 | 5.79484 |
| 0 | 6.12881 |
| 0 | 7.47359 |
| 0 | 7.31032 |
| 0 | 7.07119 |
| 0 | 6.03059 |
| 0 | 6.03059 |
| 0 | 8.14205 |
| 0 | 5.7148  |
| 0 | 6.46483 |
| 0 | 7.02723 |
| 0 | 9.18751 |

|   |         |
|---|---------|
| 0 | 5.6326  |
| 0 | 5.6326  |
| 0 | 6.25507 |
| 0 | 5.62493 |
| 0 | 9.31832 |
| 0 | 18.2382 |
| 0 | 16.0998 |
| 0 | 13.6349 |
| 0 | 6.33533 |
| 0 | 6.27402 |
| 0 | 5.47942 |
| 0 | 6.06624 |
| 0 | 8.05446 |
| 0 | 8.01172 |
| 0 | 7.148   |
| 0 | 8.06037 |
| 0 | 8.11801 |
| 0 | 5.84952 |
| 0 | 5.99715 |
| 0 | 6.71961 |
| 0 | 5.44572 |
| 0 | 8.34886 |
| 0 | 9.5512  |
| 0 | 6.13192 |
| 0 | 6.0257  |
| 0 | 6.14103 |
| 0 | 5.47306 |
| 0 | 6.12694 |
| 0 | 7.47947 |
| 0 | 5.53253 |
| 0 | 7.20175 |
| 0 | 5.52752 |
| 0 | 9.44295 |
| 0 | 6.10303 |
| 0 | 5.56561 |
| 0 | 8.20548 |
| 0 | 5.50391 |
| 0 | 7.5621  |
| 0 | 7.20859 |
| 0 | 7.0696  |
| 0 | 5.63471 |
| 0 | 5.45003 |
| 0 | 5.73953 |
| 0 | 12.8863 |
| 0 | 12.3257 |
| 0 | 5.70713 |
| 0 | 7.33314 |

|   |         |
|---|---------|
| 0 | 5.50454 |
| 0 | 5.51591 |
| 0 | 6.48208 |
| 0 | 6.48208 |
| 0 | 5.59466 |
| 0 | 7.05933 |
| 0 | 5.58849 |
| 0 | 5.5185  |
| 0 | 5.76711 |
| 0 | 5.44558 |
| 0 | 6.31966 |
| 0 | 5.44525 |
| 0 | 5.71546 |
| 0 | 6.08592 |
| 0 | 7.832   |
| 0 | 12.476  |
| 0 | 8.81633 |
| 0 | 5.71835 |
| 0 | 7.69864 |
| 0 | 12.562  |
| 0 | 6.24214 |
| 0 | 6.31448 |
| 0 | 6.3675  |
| 0 | 5.55949 |
| 0 | 5.72747 |
| 0 | 5.68726 |
| 0 | 7.28207 |
| 0 | 6.00214 |
| 0 | 5.61939 |
| 0 | 6.65248 |
| 0 | 12.7852 |
| 0 | 5.76778 |
| 0 | 10.5933 |
| 0 | 7.1517  |
| 0 | 12.2657 |
| 0 | 12.0391 |
| 0 | 5.91365 |
| 0 | 5.52529 |
| 0 | 6.40782 |
| 0 | 7.91364 |
| 0 | 5.49485 |
| 0 | 5.71992 |
| 0 | 5.50402 |
| 0 | 6.04659 |
| 0 | 7.81854 |
| 0 | 6.51131 |
| 0 | 6.04825 |

|   |         |
|---|---------|
| 0 | 6.0349  |
| 0 | 18.8861 |
| 0 | 5.46164 |
| 0 | 9.34369 |
| 0 | 5.58613 |
| 0 | 8.4778  |
| 0 | 5.51184 |
| 0 | 7.30381 |
| 0 | 6.39583 |
| 0 | 5.95996 |
| 0 | 7.00823 |
| 0 | 6.01904 |
| 0 | 6.02638 |
| 0 | 7.81987 |
| 0 | 7.81987 |
| 0 | 5.87259 |
| 0 | 5.89185 |
| 0 | 5.92873 |
| 0 | 7.08677 |
| 0 | 5.75102 |
| 0 | 5.62313 |
| 0 | 6.11181 |
| 0 | 5.59483 |
| 0 | 6.40562 |
| 0 | 7.29062 |
| 0 | 6.08395 |
| 0 | 6.03343 |
| 0 | 6.18753 |
| 0 | 7.06117 |
| 0 | 5.61028 |
| 0 | 6.06467 |
| 0 | 6.30866 |
| 0 | 8.01758 |
| 0 | 12.4118 |
| 0 | 5.66206 |
| 0 | 5.54029 |
| 0 | 6.67007 |
| 0 | 8.20175 |
| 0 | 7.32169 |
| 0 | 5.58882 |
| 0 | 6.00606 |
| 0 | 5.62794 |
| 0 | 7.03137 |
| 0 | 7.08465 |
| 0 | 6.67928 |
| 0 | 5.49317 |
| 0 | 9.37634 |

|          |         |
|----------|---------|
| 0        | 5.50486 |
| 0        | 6.1656  |
| 0        | 7.04027 |
| 0        | 5.67159 |
| 0        | 7.02419 |
| 0        | 6.22839 |
| 0        | 6.02059 |
| 0        | 6.11426 |
| 0        | 6.20806 |
| 0        | 6.22872 |
| 0        | 7.97943 |
| 0        | 6.20145 |
| 0        | 5.54659 |
| 0        | 5.55344 |
| 0        | 5.55344 |
| 0        | 5.90366 |
| 0        | 5.45343 |
| 0        | 6.18225 |
| 0        | 6.01983 |
| 0        | 5.5731  |
| 0.428571 | 6.66905 |
| 0        | 7.30671 |
| 0        | 7.30671 |
| 0        | 9.55523 |
| 0        | 5.45041 |
| 0        | 7.50002 |
| 0        | 7.10926 |
| 0        | 7.28059 |
| 0        | 5.54163 |
| 0        | 6.25719 |
| 0        | 6.03565 |
| 0        | 6.06123 |
| 0        | 5.49234 |
| 0        | 5.67846 |
| 0        | 5.51947 |
| 0        | 14.4464 |
| 0        | 5.57983 |
| 0        | 15.9533 |
| 0        | 5.49273 |
| 0        | 5.88068 |
| 0        | 5.51913 |
| 0        | 6.5122  |
| 0        | 7.03611 |
| 0        | 8.25933 |
| 0        | 5.65012 |
| 0        | 7.10543 |
| 0        | 6.44823 |

|   |         |
|---|---------|
| 0 | 7.04836 |
| 0 | 5.59199 |
| 0 | 5.62951 |
| 0 | 6.05383 |
| 0 | 5.6718  |
| 0 | 5.46259 |
| 0 | 6.49776 |
| 0 | 9.12865 |
| 0 | 14.1735 |
| 0 | 5.49932 |
| 0 | 7.00903 |
| 0 | 6.36013 |
| 0 | 9.43097 |
| 0 | 5.51793 |
| 0 | 6.08132 |
| 0 | 5.63971 |
| 0 | 5.5796  |
| 0 | 6.72741 |
| 0 | 7.15309 |
| 0 | 6.0957  |
| 0 | 7.54878 |
| 0 | 8.00798 |
| 0 | 5.57919 |
| 0 | 7.33076 |
| 0 | 7.00077 |
| 0 | 8.16926 |
| 0 | 7.24814 |
| 0 | 6.15351 |
| 0 | 6.16464 |
| 0 | 5.88964 |
| 0 | 7.02465 |
| 0 | 5.52718 |
| 0 | 14.0605 |
| 0 | 6.24125 |
| 0 | 7.00599 |
| 0 | 6.43305 |
| 0 | 7.13429 |
| 0 | 5.58074 |
| 0 | 12.8787 |
| 0 | 6.01221 |
| 0 | 5.54448 |
| 0 | 6.6351  |
| 0 | 5.60677 |
| 0 | 6.52848 |
| 0 | 8.42669 |
| 0 | 9.23962 |
| 0 | 6.42936 |



|   |         |
|---|---------|
| 0 | 5.7952  |
| 0 | 5.98292 |
| 0 | 6.40994 |
| 0 | 5.71848 |
| 0 | 7.02726 |
| 0 | 5.5276  |
| 0 | 8.1046  |
| 0 | 5.63736 |
| 0 | 6.16165 |
| 0 | 5.52572 |
| 0 | 6.40689 |
| 0 | 5.68685 |
| 0 | 7.14653 |
| 0 | 12.4241 |
| 0 | 6.01107 |
| 0 | 6.14019 |
| 0 | 9.17264 |
| 0 | 6.00613 |
| 0 | 5.53379 |
| 0 | 5.53379 |
| 0 | 5.72758 |
| 0 | 6.68562 |
| 0 | 5.4725  |
| 0 | 7.06066 |
| 0 | 5.50946 |
| 0 | 6.29406 |
| 0 | 5.68541 |
| 0 | 7.1319  |
| 0 | 5.60803 |
| 0 | 5.74136 |
| 0 | 7.02596 |
| 0 | 6.93473 |
| 0 | 8.03643 |
| 0 | 6.34194 |
| 0 | 6.26999 |
| 0 | 5.58832 |
| 0 | 6.10639 |
| 0 | 10.4058 |
| 0 | 5.64576 |
| 0 | 5.67177 |
| 0 | 8.32991 |
| 0 | 9.26659 |
| 0 | 5.92282 |
| 0 | 7.11969 |
| 0 | 5.72575 |
| 0 | 7.17488 |
| 0 | 5.62389 |

|   |         |
|---|---------|
| 0 | 5.85266 |
| 0 | 6.03031 |
| 0 | 7.40499 |
| 0 | 6.62437 |
| 0 | 6.62437 |
| 0 | 6.09468 |
| 0 | 5.96963 |
| 0 | 6.93311 |
| 0 | 6.17645 |
| 0 | 8.0161  |
| 0 | 5.70827 |
| 0 | 6.1702  |
| 0 | 7.26963 |
| 0 | 5.68259 |
| 0 | 5.68259 |
| 0 | 6.052   |
| 0 | 6.76351 |
| 0 | 5.53279 |
| 0 | 6.08768 |
| 0 | 5.74327 |
| 0 | 5.6948  |
| 0 | 6.25128 |
| 0 | 5.57618 |
| 0 | 5.68888 |
| 0 | 7.48982 |
| 0 | 6.05139 |
| 0 | 6.75041 |
| 0 | 5.55241 |
| 0 | 6.86347 |
| 0 | 6.00252 |
| 0 | 5.55484 |
| 0 | 5.55484 |
| 0 | 6.28299 |
| 0 | 6.49564 |
| 0 | 7.10536 |
| 0 | 7.10536 |
| 0 | 7.08218 |
| 0 | 7.08218 |
| 0 | 6.25879 |
| 0 | 5.71939 |
| 0 | 6.06431 |
| 0 | 6.84672 |
| 0 | 5.94735 |
| 0 | 6.24022 |
| 0 | 5.48229 |
| 0 | 5.70086 |
| 0 | 6.35671 |

|   |         |
|---|---------|
| 0 | 7.08972 |
| 0 | 7.08972 |
| 0 | 5.59406 |
| 0 | 5.58701 |
| 0 | 5.55637 |
| 0 | 6.07274 |
| 0 | 7.15709 |
| 0 | 5.497   |
| 0 | 5.64219 |
| 0 | 5.48287 |
| 0 | 6.05907 |
| 0 | 6.04632 |
| 0 | 6.56136 |
| 0 | 6.22577 |
| 0 | 6.14522 |
| 0 | 6.14522 |
| 0 | 8.37817 |
| 0 | 7.29411 |
| 0 | 6.46872 |
| 0 | 5.57939 |
| 0 | 6.14233 |
| 0 | 5.64652 |
| 0 | 6.00136 |
| 0 | 5.99525 |
| 0 | 5.99525 |
| 0 | 6.30004 |
| 0 | 7.18675 |
| 0 | 7.27948 |
| 0 | 5.51556 |
| 0 | 6.32763 |
| 0 | 13.2409 |
| 0 | 7.15327 |
| 0 | 6.11673 |
| 0 | 6.28872 |
| 0 | 5.48707 |
| 0 | 6.12087 |
| 0 | 6.04878 |
| 0 | 5.49239 |
| 0 | 5.46923 |
| 0 | 11.0518 |
| 0 | 15.3156 |
| 0 | 5.72097 |
| 0 | 9.18263 |
| 0 | 5.85607 |
| 0 | 6.15085 |
| 0 | 5.55421 |
| 0 | 5.55421 |

|   |         |
|---|---------|
| 0 | 8.16439 |
| 0 | 6.28125 |
| 0 | 7.41146 |
| 0 | 6.38617 |
| 0 | 6.38617 |
| 0 | 5.5665  |
| 0 | 9.08275 |
| 0 | 7.12996 |
| 0 | 5.53988 |
| 0 | 7.10571 |
| 0 | 7.44681 |
| 0 | 7.21508 |
| 0 | 6.23758 |
| 0 | 5.61116 |
| 0 | 5.53141 |
| 0 | 10.0761 |
| 0 | 6.28965 |
| 0 | 5.67955 |
| 0 | 5.99002 |
| 0 | 7.08159 |
| 0 | 6.29942 |
| 0 | 7.1329  |
| 0 | 5.92474 |
| 0 | 6.29177 |
| 0 | 6.50016 |
| 0 | 5.59107 |
| 0 | 5.77866 |
| 0 | 6.49761 |
| 0 | 10.0192 |
| 0 | 5.6538  |
| 0 | 11.8686 |
| 0 | 5.66792 |
| 0 | 6.38089 |
| 0 | 5.5318  |
| 0 | 6.1363  |
| 0 | 6.04547 |
| 0 | 5.47807 |
| 0 | 11.2385 |
| 0 | 7.07531 |
| 0 | 5.49318 |
| 0 | 5.54415 |
| 0 | 5.54415 |
| 0 | 5.67914 |
| 0 | 8.21454 |
| 0 | 6.20667 |
| 0 | 8.2536  |
| 0 | 5.59614 |

|   |         |
|---|---------|
| 0 | 6.31568 |
| 0 | 5.75408 |
| 0 | 5.59337 |
| 0 | 6.13089 |
| 0 | 5.52533 |
| 0 | 6.59037 |
| 0 | 6.64893 |
| 0 | 6.07808 |
| 0 | 6.17065 |
| 0 | 6.2598  |
| 0 | 5.59542 |
| 0 | 14.2538 |
| 0 | 5.49552 |
| 0 | 5.49552 |
| 0 | 5.62084 |
| 0 | 8.02584 |
| 0 | 7.04253 |
| 0 | 5.57158 |
| 0 | 5.5374  |
| 0 | 8.04543 |
| 0 | 6.48117 |
| 0 | 5.44281 |
| 0 | 7.92859 |
| 0 | 5.74632 |
| 0 | 7.41361 |
| 0 | 8.31787 |
| 0 | 5.46701 |
| 0 | 11.4944 |
| 0 | 6.09458 |
| 0 | 6.04915 |
| 0 | 7.12848 |
| 0 | 14.0919 |
| 0 | 7.11132 |
| 0 | 5.60422 |
| 0 | 6.69174 |
| 0 | 6.04334 |
| 0 | 23.038  |
| 0 | 6.1502  |
| 0 | 5.468   |
| 0 | 5.468   |
| 0 | 5.62695 |
| 0 | 5.62695 |
| 0 | 15.291  |
| 0 | 5.63002 |
| 0 | 16.3877 |
| 0 | 5.43155 |
| 0 | 5.49864 |

|   |         |
|---|---------|
| 0 | 5.55893 |
| 0 | 6.29729 |
| 0 | 8.12773 |
| 0 | 6.36695 |
| 0 | 6.24155 |
| 0 | 5.60574 |
| 0 | 6.13725 |
| 0 | 5.7257  |
| 0 | 7.99997 |
| 0 | 7.99997 |
| 0 | 5.5389  |
| 0 | 10.3926 |
| 0 | 6.26741 |
| 0 | 5.88476 |
| 0 | 7.03701 |
| 0 | 6.43931 |
| 0 | 7.26136 |
| 0 | 6.2108  |
| 0 | 5.79338 |
| 0 | 5.6441  |
| 0 | 5.6441  |
| 0 | 12.4474 |
| 0 | 6.0142  |
| 0 | 21.1545 |
| 0 | 7.22994 |
| 0 | 5.59582 |
| 0 | 5.59582 |
| 0 | 9.04441 |
| 0 | 5.47406 |
| 0 | 5.4627  |
| 0 | 7.03791 |
| 0 | 6.37384 |
| 0 | 13.1052 |
| 0 | 9.65034 |
| 0 | 7.37346 |
| 0 | 9.23531 |
| 0 | 24.0077 |
| 0 | 10.2779 |
| 0 | 7.89551 |
| 0 | 25.9868 |
| 0 | 28.1712 |
| 0 | 6.14902 |
| 0 | 5.82517 |
| 0 | 7.42644 |
| 0 | 5.46839 |
| 0 | 7.40175 |
| 0 | 5.54873 |

|   |         |
|---|---------|
| 0 | 9.07836 |
| 0 | 7.01409 |
| 0 | 6.35176 |
| 0 | 5.54628 |
| 0 | 6.24836 |
| 0 | 5.99515 |
| 0 | 7.25142 |
| 0 | 7.49845 |
| 0 | 5.47853 |
| 0 | 9.9612  |
| 0 | 6.25964 |
| 0 | 7.51062 |
| 0 | 6.01363 |
| 0 | 10.5548 |
| 0 | 5.45924 |
| 0 | 8.50778 |
| 0 | 6.11994 |
| 0 | 6.50988 |
| 0 | 5.90429 |
| 0 | 9.2483  |
| 0 | 5.51432 |
| 0 | 5.9334  |
| 0 | 6.24299 |
| 0 | 6.24299 |
| 0 | 8.12527 |
| 0 | 7.10775 |
| 0 | 5.74882 |
| 0 | 5.63389 |
| 0 | 5.54426 |
| 0 | 6.38505 |
| 0 | 6.07391 |
| 0 | 6.12998 |
| 0 | 7.11784 |
| 0 | 5.65141 |
| 0 | 6.46537 |
| 0 | 6.46537 |
| 0 | 5.57267 |
| 0 | 6.27613 |
| 0 | 5.44193 |
| 0 | 9.10058 |
| 0 | 5.6282  |
| 0 | 7.00225 |
| 0 | 5.58826 |
| 0 | 6.52879 |
| 0 | 6.03881 |
| 0 | 10.6248 |
| 0 | 6.22184 |

|   |         |
|---|---------|
| 0 | 8.13915 |
| 0 | 8.12452 |
| 0 | 5.63352 |
| 0 | 7.04511 |
| 0 | 6.30384 |
| 0 | 5.78925 |
| 0 | 5.72178 |
| 0 | 5.91438 |
| 0 | 6.04715 |
| 0 | 7.13503 |
| 0 | 5.53634 |
| 0 | 5.79926 |
| 0 | 6.04897 |
| 0 | 7.10558 |
| 0 | 5.76563 |
| 0 | 5.58148 |
| 0 | 5.53119 |
| 0 | 9.33237 |
| 0 | 6.07854 |
| 0 | 5.51774 |
| 0 | 5.67659 |
| 0 | 8.28101 |
| 0 | 7.53026 |
| 0 | 7.24515 |
| 0 | 10.4006 |
| 0 | 10.2808 |
| 0 | 5.46607 |
| 0 | 13.5025 |
| 0 | 7.01612 |
| 0 | 6.30025 |
| 0 | 6.15355 |
| 0 | 5.47302 |
| 0 | 11.2952 |
| 0 | 5.6151  |
| 0 | 5.69122 |
| 0 | 6.27246 |
| 0 | 7.41655 |
| 0 | 6.84834 |
| 0 | 6.84834 |
| 0 | 5.78839 |
| 0 | 6.00934 |
| 0 | 7.35229 |
| 0 | 5.59087 |
| 0 | 6.4121  |
| 0 | 5.4316  |
| 0 | 5.61575 |
| 0 | 5.63481 |



|   |         |
|---|---------|
| 0 | 5.43951 |
| 0 | 6.39782 |
| 0 | 6.05527 |
| 0 | 5.4807  |
| 0 | 7.00556 |
| 0 | 7.00556 |
| 0 | 6.02754 |
| 0 | 5.49112 |
| 0 | 5.49215 |
| 0 | 5.47715 |
| 0 | 5.67865 |
| 0 | 6.32815 |
| 0 | 5.7429  |
| 0 | 6.20188 |
| 0 | 6.9746  |
| 0 | 5.69149 |
| 0 | 9.3567  |
| 0 | 7.70187 |
| 0 | 8.72899 |
| 0 | 5.50325 |
| 0 | 8.0972  |
| 0 | 7.57877 |
| 0 | 5.43439 |
| 0 | 8.37588 |
| 0 | 6.16046 |
| 0 | 5.56315 |
| 0 | 6.12232 |
| 0 | 6.69472 |
| 0 | 5.71188 |
| 0 | 14.0483 |
| 0 | 8.041   |
| 0 | 11.5061 |
| 0 | 5.85289 |
| 0 | 6.11609 |
| 0 | 5.48946 |
| 0 | 6.47339 |
| 0 | 6.41275 |
| 0 | 6.52684 |
| 0 | 5.89004 |
| 0 | 5.64118 |
| 0 | 6.34869 |
| 0 | 5.85566 |
| 0 | 6.23096 |
| 0 | 6.08987 |
| 0 | 9.39972 |
| 0 | 6.15074 |
| 0 | 6.16265 |

|   |         |
|---|---------|
| 0 | 8.28923 |
| 0 | 5.59436 |
| 0 | 5.68059 |
| 0 | 6.49217 |
| 0 | 6.06494 |
| 0 | 9.17781 |
| 0 | 10.2271 |
| 0 | 6.53183 |
| 0 | 7.29973 |
| 0 | 5.60851 |
| 0 | 8.64071 |
| 0 | 7.80841 |
| 0 | 5.62163 |
| 0 | 6.40098 |
| 0 | 5.49181 |
| 0 | 7.29828 |
| 0 | 5.65542 |
| 0 | 9.48982 |
| 0 | 8.47509 |
| 0 | 9.46166 |
| 0 | 5.58986 |
| 0 | 6.16307 |
| 0 | 6.11322 |
| 0 | 7.01888 |
| 0 | 9.06105 |
| 0 | 6.43743 |
| 0 | 5.73013 |
| 0 | 5.73013 |
| 0 | 8.05114 |
| 0 | 6.3961  |
| 0 | 5.55158 |
| 0 | 6.67055 |
| 0 | 6.38126 |
| 0 | 6.96491 |
| 0 | 7.258   |
| 0 | 9.14401 |
| 0 | 6.24303 |
| 0 | 5.44872 |
| 0 | 5.95028 |
| 0 | 5.91145 |
| 0 | 6.17466 |
| 0 | 6.2885  |
| 0 | 5.45839 |
| 0 | 5.74447 |
| 0 | 6.39502 |
| 0 | 5.79964 |
| 0 | 5.79964 |

|   |         |
|---|---------|
| 0 | 7.18356 |
| 0 | 7.18356 |
| 0 | 5.75585 |
| 0 | 5.76441 |
| 0 | 5.63603 |
| 0 | 5.47    |
| 0 | 9.0195  |
| 0 | 8.17434 |
| 0 | 7.01591 |
| 0 | 5.47488 |
| 0 | 5.47488 |
| 0 | 6.03876 |
| 0 | 8.20834 |
| 0 | 6.15766 |
| 0 | 39.7762 |
| 0 | 8.73167 |
| 0 | 6.83407 |
| 0 | 6.83407 |
| 0 | 5.48448 |
| 0 | 5.78021 |
| 0 | 6.32536 |
| 0 | 5.44258 |
| 0 | 5.79633 |
| 0 | 5.53385 |
| 0 | 7.26477 |
| 0 | 9.12895 |
| 0 | 5.92495 |
| 0 | 5.52443 |
| 0 | 5.70734 |
| 0 | 5.56735 |
| 0 | 6.73938 |
| 0 | 7.16961 |
| 0 | 7.16961 |
| 0 | 7.1847  |
| 0 | 6.11178 |
| 0 | 5.44815 |
| 0 | 5.43765 |
| 0 | 6.07593 |
| 0 | 9.06474 |
| 0 | 6.49037 |
| 0 | 5.78976 |
| 0 | 12.3114 |
| 0 | 5.89805 |
| 0 | 7.22134 |
| 0 | 6.38716 |
| 0 | 6.19963 |
| 0 | 6.11041 |

|   |         |
|---|---------|
| 0 | 5.50528 |
| 0 | 6.38892 |
| 0 | 5.58673 |
| 0 | 5.89546 |
| 0 | 6.19654 |
| 0 | 5.45824 |
| 0 | 5.53993 |
| 0 | 8.34677 |
| 0 | 5.75518 |
| 0 | 6.23568 |
| 0 | 7.07293 |
| 0 | 9.16613 |
| 0 | 5.87888 |
| 0 | 6.27446 |
| 0 | 5.83175 |
| 0 | 5.65811 |
| 0 | 15.3815 |
| 0 | 6.23825 |
| 0 | 5.46059 |
| 0 | 5.46897 |
| 0 | 6.17866 |
| 0 | 5.6436  |
| 0 | 5.78487 |
| 0 | 5.59268 |
| 0 | 7.28497 |
| 0 | 5.93351 |
| 0 | 6.54887 |
| 0 | 5.57745 |
| 0 | 5.57425 |
| 0 | 5.8782  |
| 0 | 9.22713 |
| 0 | 5.65323 |
| 0 | 6.30903 |
| 0 | 8.15539 |
| 0 | 5.64698 |
| 0 | 6.92741 |
| 0 | 8.23099 |
| 0 | 5.7328  |
| 0 | 7.61498 |
| 0 | 6.36389 |
| 0 | 7.02965 |
| 0 | 6.7644  |
| 0 | 5.64447 |
| 0 | 6.1453  |
| 0 | 5.95006 |
| 0 | 5.46327 |
| 0 | 6.57786 |

|   |         |
|---|---------|
| 0 | 7.80367 |
| 0 | 5.75601 |
| 0 | 5.59537 |
| 0 | 11.37   |
| 0 | 6.06574 |
| 0 | 6.58879 |
| 0 | 5.5108  |
| 0 | 6.04381 |
| 0 | 23.5487 |
| 0 | 13.3567 |
| 0 | 9.02554 |
| 0 | 6.62876 |
| 0 | 6.66739 |
| 0 | 5.4337  |
| 0 | 5.4337  |
| 0 | 5.60893 |
| 0 | 5.60893 |
| 0 | 5.66522 |
| 0 | 9.03784 |
| 0 | 7.24475 |
| 0 | 12.1768 |
| 0 | 6.03895 |
| 0 | 5.58226 |
| 0 | 5.64116 |
| 0 | 6.02639 |
| 0 | 11.3779 |
| 0 | 8.16077 |
| 0 | 6.52767 |
| 0 | 32.0407 |
| 0 | 10.2676 |
| 0 | 11.0899 |
| 0 | 8.02136 |
| 0 | 22.203  |
| 0 | 8.35228 |
| 0 | 8.09428 |
| 0 | 11.5878 |
| 0 | 11.0739 |
| 0 | 9.05375 |
| 0 | 5.8683  |
| 0 | 7.17966 |
| 0 | 5.71291 |
| 0 | 5.71291 |
| 0 | 6.6928  |
| 0 | 6.6928  |
| 0 | 6.91277 |
| 0 | 7.06575 |
| 0 | 6.07926 |

|   |         |
|---|---------|
| 0 | 5.54416 |
| 0 | 8.58879 |
| 0 | 19.0125 |
| 0 | 11.8604 |
| 0 | 5.5636  |
| 0 | 7.88892 |
| 0 | 7.12884 |
| 0 | 8.15102 |
| 0 | 8.01566 |
| 0 | 6.16941 |
| 0 | 7.60242 |
| 0 | 8.1403  |
| 0 | 6.65871 |
| 0 | 5.74858 |
| 0 | 9.00605 |
| 0 | 8.03547 |
| 0 | 9.03411 |
| 0 | 8.00474 |
| 0 | 9.20548 |
| 0 | 5.43476 |
| 0 | 10.2088 |
| 0 | 5.48257 |
| 0 | 6.06087 |
| 0 | 10.1454 |
| 0 | 6.26847 |
| 0 | 13.0416 |
| 0 | 5.49753 |
| 0 | 7.29788 |
| 0 | 6.24576 |
| 0 | 7.99861 |
| 0 | 6.44756 |
| 0 | 6.06173 |
| 0 | 5.53588 |
| 0 | 7.37034 |
| 0 | 14.3253 |
| 0 | 11.034  |
| 0 | 5.80315 |
| 0 | 7.12715 |
| 0 | 12.7761 |
| 0 | 10.0276 |
| 0 | 6.50306 |
| 0 | 6.12282 |
| 0 | 6.07253 |
| 0 | 5.53748 |
| 0 | 5.48328 |
| 0 | 5.69468 |
| 0 | 5.66352 |

|   |         |
|---|---------|
| 0 | 5.45002 |
| 0 | 5.86484 |
| 0 | 6.18683 |
| 0 | 6.118   |
| 0 | 7.55066 |
| 0 | 6.01073 |
| 0 | 6.26969 |
| 0 | 5.73038 |
| 0 | 12.1734 |
| 0 | 7.24229 |
| 0 | 7.09788 |
| 0 | 5.58181 |
| 0 | 6.06035 |
| 0 | 6.06216 |
| 0 | 7.35751 |
| 0 | 11.1477 |
| 0 | 8.24497 |
| 0 | 5.67478 |
| 0 | 9.20844 |
| 0 | 6.70435 |
| 0 | 5.84249 |
| 0 | 6.10744 |
| 0 | 5.56715 |
| 0 | 5.5851  |
| 0 | 5.57061 |
| 0 | 5.48694 |
| 0 | 5.48694 |
| 0 | 5.66354 |
| 0 | 6.0681  |
| 0 | 7.3758  |
| 0 | 6.28538 |
| 0 | 9.03856 |
| 0 | 6.05742 |
| 0 | 8.17842 |
| 0 | 5.48889 |
| 0 | 5.64661 |
| 0 | 8.01749 |
| 0 | 7.35956 |
| 0 | 5.835   |
| 0 | 6.93467 |
| 0 | 5.73421 |
| 0 | 8.68162 |
| 0 | 5.68048 |
| 0 | 8.28434 |
| 0 | 7.30889 |
| 0 | 8.2669  |
| 0 | 5.46755 |

|   |         |
|---|---------|
| 0 | 7.90513 |
| 0 | 5.90522 |
| 0 | 5.48027 |
| 0 | 5.44711 |
| 0 | 6.0119  |
| 0 | 5.59195 |
| 0 | 6.59434 |
| 0 | 5.56647 |
| 0 | 6.41314 |
| 0 | 5.72798 |
| 0 | 5.74756 |
| 0 | 5.91808 |
| 0 | 7.60532 |
| 0 | 7.28756 |
| 0 | 5.85603 |
| 0 | 5.46538 |
| 0 | 6.0768  |
| 0 | 5.7754  |
| 0 | 5.50683 |
| 0 | 5.68795 |
| 0 | 6.99854 |
| 0 | 8.17136 |
| 0 | 11.1938 |
| 0 | 8.54393 |
| 0 | 5.52895 |
| 0 | 5.46295 |
| 0 | 5.80566 |
| 0 | 5.62492 |
| 0 | 5.52238 |
| 0 | 6.21949 |
| 0 | 6.6504  |
| 0 | 9.38763 |
| 0 | 6.09447 |
| 0 | 6.55254 |
| 0 | 7.08083 |
| 0 | 6.25975 |
| 0 | 6.25975 |
| 0 | 6.63031 |
| 0 | 8.00761 |
| 0 | 5.78683 |
| 0 | 5.82261 |
| 0 | 7.4536  |
| 0 | 5.53555 |
| 0 | 5.94498 |
| 0 | 7.22536 |
| 0 | 5.79761 |
| 0 | 9.94673 |



|          |         |
|----------|---------|
| 0        | 7.9113  |
| 0        | 5.46287 |
| 0        | 5.46287 |
| 0        | 7.32589 |
| 0        | 6.64195 |
| 0        | 8.00858 |
| 0        | 6.64912 |
| 0        | 8.33069 |
| 0        | 9.10592 |
| 0        | 6.30133 |
| 0        | 6.30133 |
| 0        | 5.45034 |
| 0        | 5.60786 |
| 0        | 6.20905 |
| 0        | 12.6425 |
| 0        | 6.65414 |
| 0        | 6.06519 |
| 0        | 10.6163 |
| 0        | 7.07299 |
| 0        | 7.88578 |
| 0        | 5.45932 |
| 0        | 8.52326 |
| 0        | 6.26717 |
| 0        | 5.77936 |
| 0        | 8.71804 |
| 0        | 5.93213 |
| 0        | 5.75819 |
| 0.333333 | 6.13139 |
| 0.333333 | 6.13139 |
| 0        | 6.07308 |
| 0        | 5.48332 |
| 0        | 7.53218 |
| 0        | 5.48002 |
| 0        | 8.23648 |
| 0        | 5.65605 |
| 0        | 5.8353  |
| 0        | 5.5677  |
| 0        | 6.414   |
| 0        | 5.90362 |
| 0        | 5.52883 |
| 0        | 5.45703 |
| 0        | 6.15745 |
| 0        | 6.04699 |
| 0        | 5.79139 |
| 0        | 5.6181  |
| 0        | 5.91416 |
| 0        | 6.29442 |

|   |         |
|---|---------|
| 0 | 6.25694 |
| 0 | 9.32323 |
| 0 | 6.02406 |
| 0 | 11.2651 |
| 0 | 5.75212 |
| 0 | 7.23771 |
| 0 | 5.73233 |
| 0 | 7.89449 |
| 0 | 36.5675 |
| 0 | 6.15019 |
| 0 | 5.55276 |
| 0 | 13.0216 |
| 0 | 6.04912 |
| 0 | 16.2547 |
| 0 | 6.33701 |
| 0 | 6.08951 |
| 0 | 5.96939 |
| 0 | 8.42934 |
| 0 | 6.26608 |
| 0 | 6.11952 |
| 0 | 5.97564 |
| 0 | 21.1355 |
| 0 | 6.58278 |
| 0 | 7.37289 |
| 0 | 16.9665 |
| 0 | 6.27003 |
| 0 | 5.72764 |
| 0 | 5.46106 |
| 0 | 5.68388 |
| 0 | 6.43603 |
| 0 | 6.59826 |
| 0 | 9.08343 |
| 0 | 5.70694 |
| 0 | 6.21238 |
| 0 | 6.21238 |
| 0 | 6.28218 |
| 0 | 6.44666 |
| 0 | 6.63936 |
| 0 | 6.63936 |
| 0 | 6.04204 |
| 0 | 5.54795 |
| 0 | 6.05692 |
| 0 | 6.96893 |
| 0 | 6.0707  |
| 0 | 5.45369 |
| 0 | 7.24473 |
| 0 | 6.21043 |

|   |         |
|---|---------|
| 0 | 7.01936 |
| 0 | 6.36807 |
| 0 | 6.63903 |
| 0 | 8.18564 |
| 0 | 6.32706 |
| 0 | 6.32706 |
| 0 | 5.51581 |
| 0 | 8.12424 |
| 0 | 6.34948 |
| 0 | 5.45313 |
| 0 | 5.52639 |
| 0 | 6.29071 |
| 0 | 6.19465 |
| 0 | 6.04652 |
| 0 | 5.75939 |
| 0 | 6.03996 |
| 0 | 7.50077 |
| 0 | 6.41884 |
| 0 | 5.43768 |
| 0 | 5.55119 |
| 0 | 5.6086  |
| 0 | 6.201   |
| 0 | 8.19642 |
| 0 | 6.78619 |
| 0 | 6.21545 |
| 0 | 8.38692 |
| 0 | 5.52468 |
| 0 | 7.06754 |
| 0 | 6.03336 |
| 0 | 6.22272 |
| 0 | 6.22272 |
| 0 | 5.61412 |
| 0 | 7.50136 |
| 0 | 9.12867 |
| 0 | 5.65452 |
| 0 | 5.57059 |
| 0 | 5.73549 |
| 0 | 8.34325 |
| 0 | 5.73968 |
| 0 | 5.43554 |
| 0 | 6.37543 |
| 0 | 6.93187 |
| 0 | 27.8878 |
| 0 | 9.34488 |
| 0 | 5.56691 |
| 0 | 5.56691 |
| 0 | 8.17656 |

|   |         |
|---|---------|
| 0 | 5.62002 |
| 0 | 7.8433  |
| 0 | 6.41672 |
| 0 | 9.08287 |
| 0 | 5.71889 |
| 0 | 5.66843 |
| 0 | 7.34986 |
| 0 | 6.20953 |
| 0 | 14.1006 |
| 0 | 5.6357  |
| 0 | 5.6357  |
| 0 | 7.03735 |
| 0 | 6.02293 |
| 0 | 5.58218 |
| 0 | 7.01459 |
| 0 | 5.50378 |
| 0 | 6.09259 |
| 0 | 6.26791 |
| 0 | 5.50431 |
| 0 | 6.04812 |
| 0 | 6.26581 |
| 0 | 6.40081 |
| 0 | 5.81618 |
| 0 | 6.93844 |
| 0 | 6.16617 |
| 0 | 7.13778 |
| 0 | 15.4811 |
| 0 | 5.43462 |
| 0 | 5.66246 |
| 0 | 8.02295 |
| 0 | 5.54679 |
| 0 | 13.609  |
| 0 | 9.02129 |
| 0 | 11.4341 |
| 0 | 6.26074 |
| 0 | 6.49268 |
| 0 | 5.7068  |
| 0 | 6.78408 |
| 0 | 6.96027 |
| 0 | 5.89131 |
| 0 | 6.36538 |
| 0 | 5.48598 |
| 0 | 5.48598 |
| 0 | 5.46467 |
| 0 | 8.15304 |
| 0 | 8.07876 |
| 0 | 6.78423 |

|   |         |
|---|---------|
| 0 | 5.49922 |
| 0 | 5.68474 |
| 0 | 6.06863 |
| 0 | 6.11537 |
| 0 | 5.89863 |
| 0 | 5.4404  |
| 0 | 7.51187 |
| 0 | 6.02648 |
| 0 | 6.13598 |
| 0 | 6.49528 |
| 0 | 6.40552 |
| 0 | 5.44962 |
| 0 | 5.47714 |
| 0 | 5.43422 |
| 0 | 5.44378 |
| 0 | 6.3031  |
| 0 | 5.51429 |
| 0 | 5.76286 |
| 0 | 6.28397 |
| 0 | 7.24943 |
| 0 | 6.88989 |
| 0 | 5.55069 |
| 0 | 5.61056 |
| 0 | 7.47699 |
| 0 | 6.32942 |
| 0 | 5.76705 |
| 0 | 7.36672 |
| 0 | 5.57791 |
| 0 | 14.1752 |
| 0 | 6.6703  |
| 0 | 5.68665 |
| 0 | 5.65103 |
| 0 | 5.98106 |
| 0 | 7.47571 |
| 0 | 25.5969 |
| 0 | 5.44984 |
| 0 | 5.55279 |
| 0 | 5.53291 |
| 0 | 6.10569 |
| 0 | 5.43501 |
| 0 | 5.47675 |
| 0 | 5.64186 |
| 0 | 9.33017 |
| 0 | 6.54313 |
| 0 | 7.05833 |
| 0 | 9.35047 |
| 0 | 7.46844 |

|   |         |
|---|---------|
| 0 | 6.03673 |
| 0 | 6.03673 |
| 0 | 6.23441 |
| 0 | 7.11498 |
| 0 | 5.71468 |
| 0 | 6.38066 |
| 0 | 8.36532 |
| 0 | 5.96524 |
| 0 | 5.59045 |
| 0 | 6.01399 |
| 0 | 5.45042 |
| 0 | 5.66836 |
| 0 | 5.44303 |
| 0 | 5.44303 |
| 0 | 6.58823 |
| 0 | 5.49498 |
| 0 | 6.64509 |
| 0 | 5.78413 |
| 0 | 5.60514 |
| 0 | 6.44211 |
| 0 | 7.02893 |
| 0 | 5.49341 |
| 0 | 5.57504 |
| 0 | 9.09388 |
| 0 | 5.68414 |
| 0 | 5.70232 |
| 0 | 5.99202 |
| 0 | 5.56737 |
| 0 | 7.45786 |
| 0 | 5.5539  |
| 0 | 5.5539  |
| 0 | 6.07558 |
| 0 | 5.59868 |
| 0 | 6.44637 |
| 0 | 6.44637 |
| 0 | 5.53548 |
| 0 | 5.80157 |
| 0 | 13.1787 |
| 0 | 5.49504 |
| 0 | 5.49504 |
| 0 | 6.13802 |
| 0 | 6.00025 |
| 0 | 8.09981 |
| 0 | 5.76731 |
| 0 | 8.08119 |
| 0 | 6.63489 |
| 0 | 7.69131 |

|   |         |
|---|---------|
| 0 | 6.13153 |
| 0 | 9.64846 |
| 0 | 10.1378 |
| 0 | 8.35444 |
| 0 | 5.44949 |
| 0 | 6.26247 |
| 0 | 5.96634 |
| 0 | 6.11976 |
| 0 | 7.40139 |
| 0 | 6.24864 |
| 0 | 5.84377 |
| 0 | 6.5171  |
| 0 | 11.3299 |
| 0 | 8.19129 |
| 0 | 14.1211 |
| 0 | 11.9398 |
| 0 | 7.02567 |
| 0 | 8.64777 |
| 0 | 5.88669 |
| 0 | 5.94239 |
| 0 | 5.62737 |
| 0 | 6.24385 |
| 0 | 6.46327 |
| 0 | 5.48273 |
| 0 | 5.48273 |
| 0 | 5.43343 |
| 0 | 9.09271 |
| 0 | 6.04792 |
| 0 | 6.28085 |
| 0 | 50.2908 |
| 0 | 6.22319 |
| 0 | 6.47188 |
| 0 | 8.2332  |
| 0 | 6.59066 |
| 0 | 5.57429 |
| 0 | 5.63747 |
| 0 | 6.32612 |
| 0 | 7.13292 |
| 0 | 5.43318 |
| 0 | 5.95274 |
| 0 | 6.21251 |
| 0 | 11.3149 |
| 0 | 9.04885 |
| 0 | 8.56413 |
| 0 | 6.5941  |
| 0 | 8.31096 |
| 0 | 11.6782 |

|   |         |
|---|---------|
| 0 | 7.32776 |
| 0 | 6.65106 |
| 0 | 5.62643 |
| 0 | 5.43866 |
| 0 | 6.11476 |
| 0 | 6.16986 |
| 0 | 6.16986 |
| 0 | 5.67364 |
| 0 | 8.00802 |
| 0 | 5.73007 |
| 0 | 8.55295 |
| 0 | 6.29251 |
| 0 | 6.04411 |
| 0 | 5.59219 |
| 0 | 7.08657 |
| 0 | 5.86947 |
| 0 | 6.47901 |
| 0 | 5.51617 |
| 0 | 6.09604 |
| 0 | 5.853   |
| 0 | 7.79357 |
| 0 | 5.49204 |
| 0 | 7.39191 |
| 0 | 8.12551 |
| 0 | 8.12551 |
| 0 | 8.49208 |
| 0 | 5.67024 |
| 0 | 6.00315 |
| 0 | 6.26343 |
| 0 | 6.22618 |
| 0 | 5.45764 |
| 0 | 6.02281 |
| 0 | 5.68807 |
| 0 | 6.09116 |
| 0 | 5.95765 |
| 0 | 6.2441  |
| 0 | 5.49405 |
| 0 | 5.72418 |
| 0 | 7.81233 |
| 0 | 5.53971 |
| 0 | 5.53971 |
| 0 | 6.56422 |
| 0 | 5.75701 |
| 0 | 7.17794 |
| 0 | 5.59093 |
| 0 | 11.2016 |
| 0 | 6.0074  |



|   |         |
|---|---------|
| 0 | 8.784   |
| 0 | 5.73752 |
| 0 | 7.00923 |
| 0 | 6.1307  |
| 0 | 5.53008 |
| 0 | 9.01401 |
| 0 | 7.42076 |
| 0 | 11.0227 |
| 0 | 5.65139 |
| 0 | 5.85692 |
| 0 | 8.76958 |
| 0 | 5.59826 |
| 0 | 11.3974 |
| 0 | 5.58431 |
| 0 | 5.88901 |
| 0 | 5.53444 |
| 0 | 5.69001 |
| 0 | 12.2419 |
| 0 | 8.10665 |
| 0 | 5.47499 |
| 0 | 5.84291 |
| 0 | 5.46837 |
| 0 | 6.06168 |
| 0 | 5.66694 |
| 0 | 5.6846  |
| 0 | 6.24746 |
| 0 | 6.80166 |
| 0 | 6.18191 |
| 0 | 6.42732 |
| 0 | 5.65662 |
| 0 | 7.08375 |
| 0 | 6.59219 |
| 0 | 5.84076 |
| 0 | 5.51406 |
| 0 | 8.02587 |
| 0 | 8.02587 |
| 0 | 7.26351 |
| 0 | 7.26351 |
| 0 | 12.6416 |
| 0 | 6.19108 |
| 0 | 6.19108 |
| 0 | 5.55939 |
| 0 | 7.10893 |
| 0 | 6.22639 |
| 0 | 5.48099 |
| 0 | 6.03136 |
| 0 | 6.15332 |

|   |         |
|---|---------|
| 0 | 5.45015 |
| 0 | 8.24406 |
| 0 | 6.53856 |
| 0 | 6.04848 |
| 0 | 6.62583 |
| 0 | 6.09415 |
| 0 | 6.25437 |
| 0 | 5.48296 |
| 0 | 5.6702  |
| 0 | 11.0787 |
| 0 | 7.69544 |
| 0 | 5.79104 |
| 0 | 6.55544 |
| 0 | 5.43415 |
| 0 | 5.43415 |
| 0 | 11.5183 |
| 0 | 10.94   |
| 0 | 8.15342 |
| 0 | 8.34713 |
| 0 | 5.45522 |
| 0 | 8.1073  |
| 0 | 5.47064 |
| 0 | 10.1125 |
| 0 | 6.15384 |
| 0 | 6.15384 |
| 0 | 6.05286 |
| 0 | 9.08983 |
| 0 | 7.67789 |
| 0 | 7.67789 |
| 0 | 5.55575 |
| 0 | 10.4064 |
| 0 | 13.0771 |
| 0 | 8.11491 |
| 0 | 6.4793  |
| 0 | 7.18404 |
| 0 | 7.18404 |
| 0 | 5.56882 |
| 0 | 7.13257 |
| 0 | 8.69431 |
| 0 | 6.78376 |
| 0 | 6.28291 |
| 0 | 6.11302 |
| 0 | 8.33173 |
| 0 | 7.19511 |
| 0 | 5.76425 |
| 0 | 6.02304 |
| 0 | 7.22104 |

|   |         |
|---|---------|
| 0 | 6.00784 |
| 0 | 10.2088 |
| 0 | 11.3821 |
| 0 | 14.8405 |
| 0 | 14.8405 |
| 0 | 15.5132 |
| 0 | 15.5132 |
| 0 | 17.0883 |
| 0 | 6.47678 |
| 0 | 5.60987 |
| 0 | 16.235  |
| 0 | 19.3073 |
| 0 | 16.5573 |
| 0 | 18.184  |
| 0 | 10.6275 |
| 0 | 5.79605 |
| 0 | 5.45906 |
| 0 | 6.23129 |
| 0 | 5.51319 |
| 0 | 7.09023 |
| 0 | 6.33877 |

## Gene List WT H3K9me3 High Fat Diet

| chromosome | feature start | feature end | feature      | chromosome | region start | region end |
|------------|---------------|-------------|--------------|------------|--------------|------------|
| 2          | 86282080      | 86290579    | NM_146405    | chr2       | 86286586     | 86287641   |
| 5          | 91559937      | 91568450    | NM_007423    | chr5       | 91563457     | 91564639   |
| 18         | 6133597       | 6142096     | NM_001039692 | chr18      | 6138115      | 6138970    |
| 7          | 23815050      | 23823583    | NM_021307    | chr7       | 23815067     | 23816303   |
| 11         | 3042349       | 3050848     | BC048950     | chr11      | 3049477      | 3050458    |
| 18         | 39893471      | 39901991    | NM_011033    | chr18      | 39899758     | 39901145   |
| 11         | 3090915       | 3099463     | BC046305     | chr11      | 3093119      | 3094310    |
| 18         | 37475245      | 37483744    | NM_053133    | chr18      | 37480550     | 37483059   |
| 7          | 142383906     | 142392849   | BC025150     | chr7       | 142389433    | 142390771  |
| 7          | 29797836      | 29815832    | NM_011981    | chr7       | 29812515     | 29813784   |
| 7          | 112011037     | 112019570   | NM_177282    | chr7       | 112016541    | 112017474  |
| 4          | 43840034      | 43848538    | NM_019474    | chr4       | 43840968     | 43841917   |
| 7          | 57452398      | 57461555    | NM_008071    | chr7       | 57460445     | 57461553   |
| 11         | 99683530      | 99697776    | NM_015741    | chr11      | 99691164     | 99692369   |
| 11         | 60538593      | 60547203    | NM_001009927 | chr11      | 60542351     | 60543208   |
| 11         | 60540898      | 60549416    | NM_022009    | chr11      | 60542351     | 60543208   |
| 18         | 37794309      | 37822874    | NM_033586    | chr18      | 37814724     | 37817586   |
| 8          | 69412987      | 69421509    | NM_025465    | chr8       | 69414745     | 69415896   |
| 2          | 90641994      | 90650595    | NM_019758    | chr2       | 90648191     | 90649079   |
| 11         | 3018018       | 3032526     | NM_001004146 | chr11      | 3027416      | 3032324    |
| 11         | 3090915       | 3099463     | BC046305     | chr11      | 3095386      | 3097086    |
| 11         | 3096395       | 3105264     | NM_023743    | chr11      | 3095386      | 3097086    |
| 2          | 152103969     | 152112468   | NM_175126    | chr2       | 152110890    | 152111583  |
| 12         | 114162429     | 114170928   | BC085241     | chr12      | 114164293    | 114165177  |
| 7          | 108207750     | 108216249   | NM_146738    | chr7       | 108208365    | 108209450  |
| 6          | 30886646      | 30895145    | DQ534758     | chr6       | 30886374     | 30887772   |
| 18         | 48164666      | 48174573    | NM_001025388 | chr18      | 48173343     | 48173942   |
| 7          | 47847618      | 47856318    | NM_153524    | chr7       | 47854644     | 47855228   |
| 11         | 58728147      | 58736751    | NM_138678    | chr11      | 58730289     | 58731211   |
| 16         | 91255758      | 91264386    | NM_010509    | chr16      | 91262920     | 91263892   |
| 9          | 122699594     | 122708093   | BC055684     | chr9       | 122704340    | 122704915  |
| 14         | 23119829      | 23128328    | NM_001033214 | chr14      | 23127050     | 23127741   |
| 1          | 95060247      | 95068756    | NM_172463    | chr1       | 95061939     | 95063465   |
| 7          | 88403602      | 88412101    | BC106137     | chr7       | 88406741     | 88407753   |
| 6          | 145030743     | 145039242   | NM_007532    | chr6       | 145031713    | 145032832  |
| X          | 4509172       | 4517671     | BC117727     | chrX       | 4514350      | 4516770    |
| 18         | 37633626      | 37646832    | NM_053147    | chr18      | 37644625     | 37646117   |
| 6          | 85794994      | 85803740    | NM_023455    | chr6       | 85800760     | 85801615   |
| 6          | 85466045      | 85474652    | NM_001001160 | chr6       | 85467687     | 85468481   |
| 4          | 145809847     | 145818346   | AF051348     | chr4       | 145816032    | 145817148  |
| 2          | 173374510     | 173383020   | NM_019806    | chr2       | 173374660    | 173375566  |
| 6          | 115771863     | 115780366   | NM_172086    | chr6       | 115777776    | 115778875  |
| 2          | 111575152     | 111583651   | NM_146889    | chr2       | 111580672    | 111582259  |
| 2          | 88545226      | 88553725    | NM_207567    | chr2       | 88553280     | 88553699   |

|   |    |           |           |              |       |           |           |
|---|----|-----------|-----------|--------------|-------|-----------|-----------|
|   | 17 | 46962979  | 46971478  | NM_022015    | chr17 | 46967575  | 46968611  |
|   | 18 | 37794309  | 37822874  | NM_033586    | chr18 | 37810014  | 37811269  |
|   | 11 | 3090915   | 3099463   | BC046305     | chr11 | 3097688   | 3098373   |
|   | 11 | 3096395   | 3105264   | NM_023743    | chr11 | 3097688   | 3098373   |
|   | 10 | 82409296  | 82417832  | NM_021439    | chr10 | 82413048  | 82414082  |
|   | 9  | 38232602  | 38241101  | NM_146803    | chr9  | 38237739  | 38238845  |
|   | 3  | 117561364 | 117570180 | NM_029425    | chr3  | 117565315 | 117566232 |
|   | 10 | 77570391  | 77578897  | NM_138601    | chr10 | 77573935  | 77574719  |
|   | 16 | 89847187  | 89855686  | NM_009384    | chr16 | 89851796  | 89853550  |
|   | 18 | 37555759  | 37576153  | NM_053139    | chr18 | 37561816  | 37563507  |
|   | 2  | 132569787 | 132578303 | NM_177303    | chr2  | 132572659 | 132573787 |
|   | 7  | 11164044  | 11172543  | NM_134210    | chr7  | 11165396  | 11166652  |
|   | 18 | 37794309  | 37822874  | NM_033586    | chr18 | 37806151  | 37807289  |
|   | 17 | 23976426  | 23984947  | NM_007634    | chr17 | 23983028  | 23984006  |
|   | 10 | 57616384  | 57638017  | NM_001034869 | chr10 | 57628944  | 57630424  |
|   | 1  | 188655296 | 188670703 | NM_033077    | chr1  | 188668519 | 188669715 |
|   | 7  | 39184821  | 39193364  | NM_177890    | chr7  | 39185600  | 39187455  |
|   | 7  | 47394385  | 47402884  | NM_153101    | chr7  | 47396441  | 47397558  |
|   | 7  | 45016396  | 45040099  | NM_182993    | chr7  | 45037240  | 45038566  |
| X |    | 69438936  | 69447441  | BC064787     | chrX  | 69446413  | 69447406  |
|   | 11 | 119165647 | 119174146 | NM_178743    | chr11 | 119168914 | 119169637 |
|   | 11 | 119169101 | 119177628 | NM_018822    | chr11 | 119168914 | 119169637 |
|   | 14 | 121310884 | 121319383 | NM_029556    | chr14 | 121314308 | 121315178 |
|   | 11 | 19916630  | 19925129  | BC030460     | chr11 | 19921451  | 19922565  |
|   | 9  | 30686127  | 30694627  | NM_013906    | chr9  | 30693492  | 30694594  |
|   | 19 | 13378803  | 13387302  | NM_001011841 | chr19 | 13380746  | 13381865  |
|   | 15 | 98706856  | 98715440  | NM_026967    | chr15 | 98711714  | 98712450  |
|   | 1  | 87847114  | 87855631  | NM_027300    | chr1  | 87846698  | 87847173  |
|   | 5  | 143616478 | 143637731 | NM_133355    | chr5  | 143624087 | 143625135 |
|   | 3  | 14549415  | 14557914  | NM_007892    | chr3  | 14555031  | 14555866  |
|   | 1  | 190976123 | 190984622 | BC056167     | chr1  | 190984239 | 190984591 |
|   | 1  | 87889790  | 87898289  | NM_027357    | chr1  | 87897141  | 87897996  |
|   | 2  | 111444335 | 111452834 | NM_146886    | chr2  | 111445989 | 111446679 |
|   | 18 | 37541392  | 37549891  | NM_053136    | chr18 | 37548176  | 37549198  |
|   | 4  | 61157932  | 61166497  | BC012259     | chr4  | 61159379  | 61160354  |
| X |    | 7564264   | 7575343   | NM_026492    | chrX  | 7569756   | 7571298   |
|   | 12 | 8622575   | 8631074   | NM_177802    | chr12 | 8625543   | 8626368   |
|   | 2  | 10282363  | 10292934  | NM_177386    | chr2  | 10286651  | 10287840  |
|   | 8  | 91581180  | 91597828  | NM_173369    | chr8  | 91584035  | 91585059  |
|   | 1  | 132736333 | 132744997 | NM_021380    | chr1  | 132737184 | 132738586 |
|   | 4  | 34997944  | 35006443  | AF017806     | chr4  | 35004569  | 35005325  |
|   | 7  | 105504777 | 105522297 | NM_018880    | chr7  | 105510248 | 105511235 |
|   | 7  | 105508269 | 105516860 | NM_019502    | chr7  | 105510248 | 105511235 |
| X |    | 69603873  | 69612372  | BC019962     | chrX  | 69604142  | 69605148  |
|   | 8  | 108546881 | 108555380 | BC046398     | chr8  | 108552783 | 108553717 |
|   | 4  | 146391107 | 146399606 | NM_001014397 | chr4  | 146395780 | 146397098 |
|   | 7  | 26318339  | 26326838  | NM_134231    | chr7  | 26321451  | 26322618  |

|          |    |           |                        |             |           |           |
|----------|----|-----------|------------------------|-------------|-----------|-----------|
|          | 18 | 65744672  | 65753171 BC046409      | chr18       | 65747969  | 65749034  |
|          | 7  | 33724327  | 33732826 NM_009596     | chr7        | 33729805  | 33730862  |
|          | 10 | 117111168 | 117119709 NM_010786    | chr10       | 117113116 | 117114032 |
|          | 13 | 105981776 | 105990275 NM_029984    | chr13       | 105981386 | 105982525 |
|          | 13 | 23470190  | 23479374 NM_013483     | chr13       | 23473257  | 23474310  |
|          | 14 | 50115375  | 50123874 NM_007449     | chr14       | 50117448  | 50118210  |
|          | 6  | 88181909  | 88190430 NM_019964     | chr6        | 88188072  | 88189068  |
| X        |    | 46668710  | 46677209 NM_146292     | chrX        | 46670467  | 46671164  |
|          | 15 | 100554911 | 100564885 NM_172451    | chr15       | 100556263 | 100557267 |
|          | 6  | 124427836 | 124436343 NM_153508    | chr6        | 124429516 | 124430581 |
|          | 5  | 138500043 | 138515732 NM_001033416 | chr5        | 138510707 | 138511560 |
|          | 5  | 138504339 | 138512838 NM_016964    | chr5        | 138510707 | 138511560 |
|          | 2  | 111219289 | 111227788 NM_207254    | chr2        | 111220611 | 111221750 |
|          | 12 | 99315639  | 99324161 NM_198311     | chr12       | 99321580  | 99322401  |
|          | 14 | 68138022  | 68146521 NM_010921     | chr14       | 68139494  | 68140281  |
|          | 16 | 88660566  | 88669065 NM_027170     | chr16       | 88664927  | 88665865  |
|          | 11 | 78798527  | 78807046 NM_010708     | chr11       | 78804697  | 78805702  |
|          | 5  | 25264062  | 25272590 NM_001004365  | chr5        | 25264425  | 25265352  |
|          | 16 | 97916170  | 97924669 NM_023663     | chr16       | 97916166  | 97916958  |
|          | 7  | 107687896 | 107696395 NM_146774    | chr7        | 107693810 | 107694820 |
|          | 7  | 33724327  | 33732826 NM_009596     | chr7        | 33731306  | 33732517  |
|          | 12 | 115604181 | 115612680 BC103785     | chr12       | 115606034 | 115607089 |
|          | 2  | 90993351  | 91001955 NM_013839     | chr2        | 90998594  | 90999232  |
|          | 2  | 90997758  | 91006268 NM_007387     | chr2        | 90998594  | 90999232  |
|          | 13 | 38197950  | 38214932 NM_026382     | chr13       | 38202488  | 38204529  |
| Y_random |    | 13974415  | 13982914 L04848        | chrY_random | 13975458  | 13976858  |
|          | 18 | 37794309  | 37822874 NM_033586     | chr18       | 37820597  | 37821723  |
|          | 5  | 142780001 | 142788550 NM_019943    | chr5        | 142781152 | 142782153 |
|          | 17 | 89816245  | 89824755 D55720        | chr17       | 89817317  | 89818089  |
|          | 1  | 192677315 | 192685839 NM_144879    | chr1        | 192682411 | 192683351 |
|          | 8  | 24700685  | 24709204 NM_024240     | chr8        | 24707672  | 24708566  |
|          | 11 | 91391122  | 91399645 NM_028547     | chr11       | 91393199  | 91393796  |
|          | 1  | 168832150 | 168840649 NM_175461    | chr1        | 168834080 | 168835106 |
|          | 2  | 85869581  | 85878080 NM_207142     | chr2        | 85875729  | 85876790  |
|          | 15 | 100409647 | 100420399 NM_010127    | chr15       | 100411968 | 100412709 |
|          | 13 | 54747311  | 54755810 AF146569      | chr13       | 54749007  | 54749944  |
|          | 8  | 42245025  | 42253524 NM_011781     | chr8        | 42246689  | 42247344  |
|          | 18 | 37794309  | 37822874 NM_033586     | chr18       | 37799153  | 37800539  |
|          | 12 | 76221153  | 76229793 NM_023275     | chr12       | 76229142  | 76229753  |
|          | 1  | 172849601 | 172858135 NM_144559    | chr1        | 172853858 | 172854937 |
|          | 9  | 97840020  | 97848519 NM_022319     | chr9        | 97846515  | 97847288  |
|          | 7  | 43371359  | 43379858 NM_028737     | chr7        | 43378881  | 43379650  |
|          | 6  | 61104115  | 61112616 BC107399      | chr6        | 61108704  | 61109809  |
|          | 11 | 107530067 | 107538566 NM_007582    | chr11       | 107533975 | 107534743 |
| Y_random |    | 1402748   | 1411247 NM_001037748   | chrY_random | 1407337   | 1408022   |
|          | 19 | 45198026  | 45206525 NM_021901     | chr19       | 45205806  | 45206506  |
|          | 4  | 153001949 | 153010484 NM_026388    | chr4        | 153007079 | 153008091 |

|          |    |           |           |              |             |           |           |
|----------|----|-----------|-----------|--------------|-------------|-----------|-----------|
|          | 7  | 62296590  | 62305089  | NM_011746    | chr7        | 62299134  | 62300204  |
|          | 4  | 49700584  | 49709117  | NM_001004025 | chr4        | 49705325  | 49706038  |
|          | 11 | 3042349   | 3050848   | BC048950     | chr11       | 3041922   | 3043762   |
|          | 19 | 44080009  | 44088510  | NM_001001446 | chr19       | 44082630  | 44083228  |
|          | 18 | 37593514  | 37632802  | NM_053143    | chr18       | 37621786  | 37623504  |
|          | 7  | 29658154  | 29666653  | NM_178384    | chr7        | 29658171  | 29658794  |
|          | 7  | 5485130   | 5493629   | NM_207544    | chr7        | 5486564   | 5487594   |
|          | 2  | 86016048  | 86024547  | NM_146582    | chr2        | 86022720  | 86023373  |
|          | 4  | 94418313  | 94426830  | NM_027089    | chr4        | 94419740  | 94420392  |
|          | 5  | 89748233  | 89756732  | NM_178700    | chr5        | 89749257  | 89750253  |
|          | 18 | 37454002  | 37470213  | NM_053132    | chr18       | 37468615  | 37469543  |
|          | 5  | 104669436 | 104678993 | NM_009263    | chr5        | 104676504 | 104677470 |
|          | 10 | 88309791  | 88318335  | NM_145423    | chr10       | 88311632  | 88312351  |
|          | 4  | 111211938 | 111220441 | NM_026470    | chr4        | 111217318 | 111218052 |
|          | 4  | 60231412  | 60239951  | NM_008647    | chr4        | 60232879  | 60233690  |
|          | 8  | 87299469  | 87308195  | NM_007578    | chr8        | 87306439  | 87307449  |
|          | 12 | 36720484  | 36734468  | NM_027699    | chr12       | 36732371  | 36733396  |
|          | 2  | 88646791  | 88655290  | NM_146463    | chr2        | 88652945  | 88654047  |
|          | 18 | 37531648  | 37540147  | NM_053135    | chr18       | 37538505  | 37539468  |
|          | 6  | 89999846  | 90008345  | NM_053218    | chr6        | 90006251  | 90007619  |
|          | 7  | 18333704  | 18342203  | BC055476     | chr7        | 18337154  | 18338132  |
|          | 6  | 29343153  | 29358378  | BC006583     | chr6        | 29349335  | 29350030  |
|          | 14 | 63898155  | 63906654  | NM_153414    | chr14       | 63904553  | 63905569  |
|          | 14 | 63901458  | 63909960  | NM_177338    | chr14       | 63904553  | 63905569  |
|          | 10 | 57616384  | 57638017  | NM_001034869 | chr10       | 57621656  | 57622768  |
| X        |    | 88033196  | 88041737  | BC116773     | chrX        | 88036994  | 88037712  |
|          | 9  | 38446448  | 38454947  | NM_146440    | chr9        | 38447937  | 38448800  |
|          | 7  | 114503786 | 114512291 | NM_054084    | chr7        | 114504109 | 114505060 |
|          | 7  | 108634686 | 108643185 | NM_146725    | chr7        | 108636241 | 108637207 |
|          | 17 | 12578760  | 12587259  | BC009123     | chr17       | 12585858  | 12586715  |
|          | 2  | 143231620 | 143240347 | NM_008792    | chr2        | 143239630 | 143240318 |
| Y_random |    | 11275195  | 11283694  | NM_001017394 | chrY_random | 11281005  | 11281690  |
|          | 19 | 13160166  | 13176303  | NM_146575    | chr19       | 13163497  | 13164399  |
|          | 6  | 52187881  | 52196458  | NM_008264    | chr6        | 52194353  | 52195108  |
|          | 18 | 37633626  | 37646832  | NM_053147    | chr18       | 37643744  | 37644471  |
|          | 14 | 54057700  | 54066620  | NM_007455    | chr14       | 54064335  | 54065334  |
|          | 12 | 109987425 | 109995924 | BC048191     | chr12       | 109988221 | 109988979 |
|          | 2  | 18610755  | 18619275  | NM_001001334 | chr2        | 18615217  | 18616101  |
|          | 17 | 71082835  | 71091334  | AF286723     | chr17       | 71088007  | 71088721  |
|          | 10 | 129092489 | 129100988 | NM_146554    | chr10       | 129098440 | 129099409 |
| Y_random |    | 13974415  | 13982914  | L04848       | chrY_random | 13980325  | 13981253  |
|          | 5  | 62091080  | 62099579  | NM_019468    | chr5        | 62097471  | 62098755  |
|          | 11 | 73965310  | 73973809  | NM_146708    | chr11       | 73971556  | 73973152  |
|          | 17 | 51295063  | 51304129  | NM_009122    | chr17       | 51299222  | 51300053  |
|          | 4  | 118278016 | 118286515 | NM_146309    | chr4        | 118278096 | 118278806 |
|          | 17 | 89816245  | 89824755  | D55720       | chr17       | 89819420  | 89820088  |
|          | 7  | 31005521  | 31014020  | NM_207262    | chr7        | 31009330  | 31009960  |

|   |    |           |           |              |       |           |           |
|---|----|-----------|-----------|--------------|-------|-----------|-----------|
|   | 2  | 42472477  | 42481607  | NM_053011    | chr2  | 42473794  | 42474554  |
|   | 1  | 74302410  | 74310995  | NM_013612    | chr1  | 74308531  | 74309524  |
|   | 9  | 108647217 | 108655853 | NM_029634    | chr9  | 108653561 | 108654435 |
|   | 8  | 109914455 | 109922954 | NM_126165    | chr8  | 109921329 | 109922100 |
|   | 7  | 30454231  | 30462801  | NM_172205    | chr7  | 30461401  | 30462397  |
|   | 7  | 82518826  | 82528206  | NM_175317    | chr7  | 82526922  | 82527922  |
|   | 7  | 82522209  | 82530713  | NM_177894    | chr7  | 82526922  | 82527922  |
|   | 19 | 24238586  | 24247145  | AF113005     | chr19 | 24241945  | 24242531  |
|   | 2  | 157255258 | 157263802 | NM_016916    | chr2  | 157258623 | 157259339 |
|   | 4  | 127760696 | 127769197 | NM_027036    | chr4  | 127768501 | 127769170 |
|   | 13 | 118715981 | 118724480 | NM_010408    | chr13 | 118722696 | 118723491 |
|   | 2  | 111759411 | 111767910 | NM_207151    | chr2  | 111761903 | 111762572 |
|   | 4  | 117224754 | 117233253 | AF178961     | chr4  | 117223905 | 117224969 |
|   | 9  | 72803176  | 72811675  | BC006717     | chr9  | 72808579  | 72810113  |
|   | 10 | 7489144   | 7497643   | BC004652     | chr10 | 7489639   | 7490263   |
|   | 8  | 24517820  | 24526319  | NM_031158    | chr8  | 24520923  | 24521785  |
|   | 1  | 169139345 | 169147970 | NM_001039483 | chr1  | 169144011 | 169144663 |
| X |    | 3241098   | 3249629   | BC089532     | chrX  | 3241433   | 3243154   |
|   | 10 | 13185226  | 13193810  | NM_025799    | chr10 | 13190867  | 13191686  |
| X |    | 46128529  | 46137028  | NM_001011794 | chrX  | 46136115  | 46136716  |
|   | 7  | 75734576  | 75743075  | BC022600     | chr7  | 75736557  | 75737210  |
|   | 4  | 148615543 | 148624067 | NM_027460    | chr4  | 148616180 | 148617023 |
|   | 2  | 89238617  | 89247116  | NM_146808    | chr2  | 89240186  | 89241206  |
|   | 6  | 132664201 | 132672700 | NM_207024    | chr6  | 132665709 | 132666656 |
|   | 11 | 114609014 | 114617513 | NM_181749    | chr11 | 114614815 | 114615599 |
|   | 11 | 114609466 | 114617982 | NM_028055    | chr11 | 114614815 | 114615599 |
|   | 6  | 129349028 | 129357527 | BC117712     | chr6  | 129353379 | 129354267 |
|   | 2  | 111134416 | 111142915 | NM_146907    | chr2  | 111135810 | 111136943 |
|   | 4  | 122823420 | 122831919 | NM_022033    | chr4  | 122823664 | 122824672 |
|   | 6  | 130156230 | 130164805 | NM_010651    | chr6  | 130162386 | 130163357 |
|   | 10 | 57616384  | 57638017  | NM_001034869 | chr10 | 57616800  | 57617882  |
|   | 6  | 31146097  | 31154596  | NM_144555    | chr6  | 31152625  | 31153703  |
|   | 4  | 41956224  | 41968645  | NM_001048179 | chr4  | 41959893  | 41960817  |
|   | 19 | 9050329   | 9058828   | NM_009643    | chr19 | 9055849   | 9056589   |
|   | 6  | 123132641 | 123141140 | NM_001004159 | chr6  | 123139127 | 123139828 |
|   | 7  | 33720144  | 33728702  | NM_203502    | chr7  | 33721537  | 33722375  |
|   | 12 | 13382553  | 13391052  | BC057020     | chr12 | 13388048  | 13388702  |
|   | 10 | 77144360  | 77172719  | NM_010670    | chr10 | 77149765  | 77150762  |
|   | 6  | 43039351  | 43047850  | NM_146655    | chr6  | 43044219  | 43044913  |
|   | 2  | 85770084  | 85778583  | NM_001011852 | chr2  | 85777695  | 85778802  |
|   | 2  | 85778681  | 85795157  | NM_001011759 | chr2  | 85777695  | 85778802  |
|   | 10 | 4418141   | 4426712   | NM_019958    | chr10 | 4418896   | 4419818   |
|   | 7  | 25383918  | 25398814  | NM_011577    | chr7  | 25394745  | 25395604  |
|   | 11 | 68685551  | 68694055  | BC021434     | chr11 | 68687342  | 68688112  |
|   | 11 | 69632136  | 69657044  | NM_198862    | chr11 | 69641759  | 69642727  |
|   | 11 | 3042349   | 3050848   | BC048950     | chr11 | 3048315   | 3048872   |
|   | 12 | 111043259 | 111051758 | NM_030238    | chr12 | 111046892 | 111048074 |



|   |    |           |           |              |       |           |           |
|---|----|-----------|-----------|--------------|-------|-----------|-----------|
|   | 17 | 88571003  | 88582018  | NM_023630    | chr17 | 88574813  | 88575856  |
|   | 1  | 74123943  | 74133838  | NM_178241    | chr1  | 74124999  | 74125976  |
|   | 2  | 148132477 | 148140985 | NM_010740    | chr2  | 148133897 | 148134935 |
|   | 14 | 53375114  | 53388323  | NM_008608    | chr14 | 53379896  | 53380834  |
|   | 5  | 88607208  | 88618756  | NM_019878    | chr5  | 88613532  | 88614214  |
|   | 9  | 123824707 | 123833206 | NM_007718    | chr9  | 123828232 | 123829355 |
|   | 1  | 93319073  | 93327599  | NM_028718    | chr1  | 93327147  | 93328045  |
| X |    | 8184444   | 8192951   | NM_031261    | chrX  | 8191552   | 8192607   |
| X |    | 165317556 | 165326055 | BC059027     | chrX  | 165325105 | 165326013 |
|   | 10 | 20411766  | 20420494  | NM_013875    | chr10 | 20414430  | 20415075  |
|   | 18 | 37776379  | 37790418  | NM_033585    | chr18 | 37785363  | 37786547  |
|   | 11 | 22866037  | 22874536  | D17407       | chr11 | 22873780  | 22874515  |
|   | 6  | 89981392  | 89989891  | NM_053219    | chr6  | 89983338  | 89984359  |
|   | 11 | 120162048 | 120170582 | M21495       | chr11 | 120168838 | 120169792 |
|   | 14 | 54458694  | 54467930  | NM_009947    | chr14 | 54459004  | 54459634  |
|   | 16 | 57673224  | 57681756  | NM_007739    | chr16 | 57677480  | 57678381  |
|   | 13 | 28017687  | 28026187  | NM_011165    | chr13 | 28019099  | 28020052  |
|   | 19 | 25733508  | 25747302  | NM_145831    | chr19 | 25741813  | 25742548  |
|   | 10 | 62044056  | 62052575  | NM_053183    | chr10 | 62049903  | 62051050  |
|   | 15 | 84838907  | 84847457  | NM_023478    | chr15 | 84843283  | 84844336  |
|   | 9  | 76829133  | 76837658  | NM_012033    | chr9  | 76831194  | 76831786  |
|   | 1  | 135143421 | 135157272 | NM_178260    | chr1  | 135156391 | 135157208 |
|   | 1  | 175919717 | 175928216 | NM_146722    | chr1  | 175925489 | 175926185 |
|   | 13 | 67303803  | 67312323  | BC089319     | chr13 | 67306200  | 67307317  |
|   | 12 | 74820742  | 74829367  | NM_010431    | chr12 | 74826394  | 74827045  |
|   | 19 | 36142875  | 36151374  | NM_019428    | chr19 | 36145287  | 36145995  |
|   | 19 | 8196528   | 8205027   | NM_001013820 | chr19 | 8199957   | 8200724   |
| X |    | 10450183  | 10484020  | BC049545     | chrX  | 10467357  | 10467922  |
|   | 18 | 37414814  | 37435955  | NM_053128    | chr18 | 37433449  | 37435199  |
|   | 15 | 96192970  | 96201469  | BC027180     | chr15 | 96197252  | 96199156  |
| X |    | 34788938  | 34797437  | BC010347     | chrX  | 34789365  | 34790107  |
|   | 15 | 11847900  | 11856399  | NM_008728    | chr15 | 11851080  | 11851701  |
|   | 19 | 42179805  | 42188338  | NM_027106    | chr19 | 42186336  | 42186963  |
|   | 5  | 136026300 | 136034799 | NM_172541    | chr5  | 136031459 | 136032295 |
|   | 16 | 42821005  | 42829504  | BC056446     | chr16 | 42826047  | 42826938  |
|   | 7  | 39184821  | 39193364  | NM_177890    | chr7  | 39187722  | 39188572  |
|   | 11 | 75003995  | 75012687  | NM_177708    | chr11 | 75009253  | 75010167  |
|   | 7  | 5662802   | 5671301   | NM_031389    | chr7  | 5668207   | 5669167   |
| X |    | 8997906   | 9009161   | NM_026096    | chrX  | 9003526   | 9004414   |
|   | 3  | 28123768  | 28132267  | U87868       | chr3  | 28129680  | 28130367  |
|   | 2  | 105463735 | 105488220 | NM_013627    | chr2  | 105487128 | 105488073 |
|   | 4  | 118713601 | 118722149 | NM_029198    | chr4  | 118714618 | 118715392 |
|   | 15 | 83175441  | 83184013  | NM_025445    | chr15 | 83177329  | 83178200  |
|   | 18 | 37555759  | 37576153  | NM_053139    | chr18 | 37572493  | 37573467  |
|   | 6  | 129470348 | 129478847 | NM_138648    | chr6  | 129470338 | 129471484 |
|   | 11 | 73661819  | 73670318  | NM_147008    | chr11 | 73664014  | 73665094  |
|   | 8  | 19445084  | 19453583  | NM_153108    | chr8  | 19445683  | 19446692  |

|    |           |           |              |       |           |           |
|----|-----------|-----------|--------------|-------|-----------|-----------|
| 11 | 99356749  | 99378943  | NM_001039666 | chr11 | 99371709  | 99372891  |
| 2  | 49267525  | 49276024  | NM_172663    | chr2  | 49270655  | 49271474  |
| 1  | 175034033 | 175042532 | NM_001001809 | chr1  | 175034055 | 175034776 |
| 6  | 130028550 | 130038951 | NM_053153    | chr6  | 130035249 | 130035857 |
| 11 | 85121449  | 85130069  | NM_016910    | chr11 | 85126624  | 85127687  |
| 12 | 113593820 | 113611608 | NM_134041    | chr12 | 113599262 | 113600155 |
| 11 | 109535847 | 109544346 | NM_153782    | chr11 | 109540257 | 109541418 |
| 9  | 122699594 | 122708093 | BC055684     | chr9  | 122701431 | 122702954 |
| 11 | 67087319  | 67095818  | NM_177369    | chr11 | 67092017  | 67092696  |
| 13 | 18949836  | 18958335  | NM_175007    | chr13 | 18953848  | 18954536  |
| 6  | 85383587  | 85400146  | NM_144918    | chr6  | 85394553  | 85395370  |
| 11 | 75252156  | 75261698  | NM_008878    | chr11 | 75253607  | 75254299  |
| 2  | 110392137 | 110400636 | NM_001003915 | chr2  | 110398255 | 110399021 |
| 4  | 122492402 | 122500901 | NM_008506    | chr4  | 122499217 | 122499950 |
| 4  | 135514058 | 135522557 | NM_011542    | chr4  | 135521809 | 135522518 |
| 7  | 47847618  | 47856318  | NM_153524    | chr7  | 47848607  | 47849408  |
| 4  | 145890306 | 145898805 | NM_009051    | chr4  | 145896558 | 145897639 |
| 9  | 118895476 | 118914645 | NM_011700    | chr9  | 118906258 | 118907162 |
| 7  | 30661456  | 30671563  | NM_011680    | chr7  | 30662554  | 30663336  |
| 6  | 148399023 | 148407522 | NM_198967    | chr6  | 148402461 | 148403064 |
| 3  | 88452978  | 88461639  | NM_031368    | chr3  | 88454268  | 88455134  |
| 2  | 87923333  | 87931832  | NM_146650    | chr2  | 87925002  | 87925749  |
| 6  | 23195766  | 23204265  | BC119565     | chr6  | 23202844  | 23203740  |
| 1  | 94319660  | 94328159  | NM_001011525 | chr1  | 94323178  | 94324022  |
| 10 | 19617888  | 19626441  | NM_008580    | chr10 | 19623784  | 19624693  |
| 6  | 130125806 | 130134306 | NM_001039117 | chr6  | 130128737 | 130129427 |
| 9  | 15050653  | 15060618  | NM_029248    | chr9  | 15053515  | 15054146  |
| 6  | 56828947  | 56837446  | BC038029     | chr6  | 56832053  | 56832754  |
| 2  | 164723485 | 164732022 | NM_144892    | chr2  | 164729247 | 164729923 |
| 12 | 94326981  | 94335755  | NM_153121    | chr12 | 94328756  | 94329509  |
| 9  | 91160877  | 91169376  | NM_009576    | chr9  | 91160889  | 91161712  |
| 9  | 91160951  | 91169704  | NM_009573    | chr9  | 91160889  | 91161712  |
| 18 | 37593514  | 37632802  | NM_053143    | chr18 | 37601571  | 37602422  |
| 3  | 57380303  | 57395848  | NM_008536    | chr3  | 57382526  | 57383191  |
| 1  | 164129814 | 164138313 | BC024584     | chr1  | 164130907 | 164131576 |
| 11 | 29374594  | 29383093  | BC037020     | chr11 | 29379124  | 29380102  |
| 7  | 40666353  | 40674852  | NM_021387    | chr7  | 40668404  | 40669151  |
| 12 | 114539677 | 114548216 | BC003844     | chr12 | 114539720 | 114540312 |
| 5  | 95707855  | 95724394  | BC099941     | chr5  | 95722769  | 95723515  |
| 1  | 30891765  | 30900301  | NM_011200    | chr1  | 30899793  | 30900245  |
| 7  | 104186777 | 104195316 | NM_023835    | chr7  | 104193326 | 104194207 |
| 10 | 12689541  | 12701151  | NM_175102    | chr10 | 12697606  | 12698222  |
| 19 | 46723685  | 46732285  | NM_007809    | chr19 | 46725591  | 46726562  |
| 2  | 130249198 | 130257697 | NM_207207    | chr2  | 130253091 | 130253749 |
| X  | 144929317 | 144937816 | NM_001037716 | chrX  | 144935775 | 144936840 |
| 3  | 75637474  | 75645999  | NM_009250    | chr3  | 75642981  | 75643668  |
| 3  | 75640183  | 75648726  | NM_019745    | chr3  | 75642981  | 75643668  |

|   |    |           |           |              |       |           |           |
|---|----|-----------|-----------|--------------|-------|-----------|-----------|
|   | 15 | 40479116  | 40488088  | NM_011766    | chr15 | 40484323  | 40485207  |
|   | 3  | 89476631  | 89485130  | NM_009565    | chr3  | 89480323  | 89481109  |
|   | 16 | 31996521  | 32005020  | NM_177326    | chr16 | 31999666  | 32000243  |
|   | 6  | 89935675  | 89944174  | NM_053229    | chr6  | 89937023  | 89937662  |
| X |    | 129926039 | 129934548 | NM_019865    | chrX  | 129933520 | 129934398 |
| X |    | 129926915 | 129935466 | NM_013482    | chrX  | 129933520 | 129934398 |
|   | 4  | 144931384 | 144939883 | BC096593     | chr4  | 144936517 | 144937272 |
|   | 11 | 28761773  | 28770272  | NM_146015    | chr11 | 28766405  | 28767451  |
| X |    | 19999537  | 20012777  | NM_009703    | chrX  | 20011149  | 20011811  |
|   | 10 | 23474117  | 23482616  | NM_011295    | chr10 | 23476976  | 23477862  |
|   | 16 | 76283872  | 76292391  | AF147745     | chr16 | 76285524  | 76286514  |
|   | 16 | 14814215  | 14822723  | NM_025769    | chr16 | 14817579  | 14818303  |
|   | 2  | 17976438  | 17984940  | AF010135     | chr2  | 17979493  | 17980195  |
|   | 7  | 104051728 | 104060227 | NM_146751    | chr7  | 104053422 | 104054234 |
|   | 3  | 129744830 | 129753338 | NM_010113    | chr3  | 129747606 | 129748454 |
|   | 5  | 24048014  | 24056522  | NM_080444    | chr5  | 24047843  | 24048478  |
|   | 18 | 50081972  | 50090471  | BC020141     | chr18 | 50082946  | 50083799  |
|   | 2  | 164740841 | 164749382 | NM_170701    | chr2  | 164743459 | 164744069 |
|   | 2  | 31903215  | 31911716  | NM_175511    | chr2  | 31910947  | 31911776  |
|   | 2  | 31911660  | 31920228  | NM_145521    | chr2  | 31910947  | 31911776  |
|   | 2  | 88256181  | 88264680  | NM_146529    | chr2  | 88262304  | 88263082  |
|   | 8  | 61797897  | 61806396  | NM_173411    | chr8  | 61798006  | 61798764  |
| X |    | 33670437  | 33683863  | NM_194063    | chrX  | 33680785  | 33681530  |
|   | 2  | 36905256  | 36913755  | NM_146368    | chr2  | 36906777  | 36907656  |
|   | 2  | 164600456 | 164608955 | BC062921     | chr2  | 164601753 | 164602727 |
|   | 11 | 101567681 | 101576180 | BC022656     | chr11 | 101573185 | 101574104 |
|   | 14 | 87312825  | 87324675  | NM_178685    | chr14 | 87319265  | 87320097  |
|   | 18 | 37555759  | 37576153  | NM_053139    | chr18 | 37568795  | 37569804  |
|   | 13 | 105224172 | 105232671 | NM_144838    | chr13 | 105232324 | 105233068 |
|   | 13 | 105227458 | 105235957 | NM_029447    | chr13 | 105232324 | 105233068 |
|   | 10 | 57218335  | 57226919  | NM_019760    | chr10 | 57221185  | 57221836  |
|   | 17 | 36837922  | 36846421  | NM_146512    | chr17 | 36841068  | 36841829  |
| X |    | 165317556 | 165326055 | BC059027     | chrX  | 165319379 | 165320167 |
| X |    | 142202881 | 142211380 | NM_008312    | chrX  | 142207825 | 142208435 |
|   | 2  | 128549419 | 128557940 | NM_024237    | chr2  | 128556250 | 128556995 |
|   | 9  | 106737469 | 106756047 | NM_029103    | chr9  | 106754270 | 106755738 |
|   | 17 | 33956403  | 33964902  | NM_079835    | chr17 | 33961337  | 33962221  |
|   | 5  | 72857714  | 72872685  | NM_001024147 | chr5  | 72861106  | 72862076  |
|   | 4  | 120320803 | 120335210 | NM_008692    | chr4  | 120321902 | 120322838 |
|   | 11 | 74148925  | 74157424  | NM_146707    | chr11 | 74151823  | 74152657  |
|   | 15 | 98082814  | 98091336  | NM_027304    | chr15 | 98089165  | 98090181  |
|   | 7  | 17510898  | 17519397  | NM_011963    | chr7  | 17515969  | 17516679  |
|   | 18 | 37454002  | 37470213  | NM_053132    | chr18 | 37460748  | 37461483  |
|   | 3  | 103181290 | 103189933 | NM_010937    | chr3  | 103185092 | 103185668 |
|   | 16 | 45523755  | 45532307  | NM_008099    | chr16 | 45531325  | 45531958  |
|   | 1  | 53727200  | 53735715  | NM_133810    | chr1  | 53732512  | 53733177  |
|   | 9  | 114211114 | 114219652 | BC020150     | chr9  | 114211467 | 114212512 |

|   |    |           |           |              |       |           |           |
|---|----|-----------|-----------|--------------|-------|-----------|-----------|
|   | 9  | 19919472  | 19927971  | NM_146904    | chr9  | 19926723  | 19927399  |
|   | 10 | 128361323 | 128369937 | NM_027853    | chr10 | 128367803 | 128368659 |
|   | 2  | 158466849 | 158479006 | NM_027975    | chr2  | 158476394 | 158477072 |
|   | 18 | 53807351  | 53815850  | BC048590     | chr18 | 53811100  | 53812050  |
|   | 10 | 93317059  | 93327001  | NM_019648    | chr10 | 93320135  | 93321038  |
|   | 18 | 24740973  | 24749478  | NM_021448    | chr18 | 24742344  | 24743086  |
|   | 4  | 88750924  | 88759423  | NM_001040654 | chr4  | 88756799  | 88757452  |
|   | 9  | 104421887 | 104430387 | NM_028719    | chr9  | 104428436 | 104429123 |
|   | 1  | 9281288   | 9290452   | NM_027671    | chr1  | 9286138   | 9287093   |
|   | 7  | 44108768  | 44117983  | NM_025880    | chr7  | 44115527  | 44116677  |
|   | 4  | 143544654 | 143553153 | BC052827     | chr4  | 143550317 | 143551025 |
|   | 4  | 143451416 | 143459915 | NM_198661    | chr4  | 143451686 | 143452444 |
|   | 9  | 45115180  | 45123933  | NM_022004    | chr9  | 45121546  | 45122633  |
|   | 13 | 76562114  | 76570636  | NM_029847    | chr13 | 76568690  | 76569352  |
|   | 14 | 66181402  | 66191721  | NM_010095    | chr14 | 66182106  | 66183412  |
|   | 1  | 65239533  | 65248032  | NM_139270    | chr1  | 65246214  | 65246954  |
|   | 3  | 107223623 | 107232122 | NM_008417    | chr3  | 107224150 | 107225047 |
|   | 15 | 83601789  | 83610288  | NM_172610    | chr15 | 83601797  | 83602508  |
|   | 2  | 87229328  | 87237827  | NM_147028    | chr2  | 87230066  | 87230746  |
|   | 11 | 53459568  | 53468088  | NM_021283    | chr11 | 53461896  | 53462732  |
|   | 2  | 88612012  | 88620511  | NM_146462    | chr2  | 88618518  | 88619478  |
|   | 16 | 27216722  | 27225385  | NM_198112    | chr16 | 27223283  | 27224198  |
|   | 13 | 38640033  | 38648575  | NM_139063    | chr13 | 38646498  | 38647430  |
|   | 17 | 72506185  | 72515164  | NM_007439    | chr17 | 72509199  | 72509887  |
|   | 5  | 29520865  | 29529364  | NM_021470    | chr5  | 29525628  | 29526390  |
|   | 19 | 42252943  | 42261563  | NM_018780    | chr19 | 42259986  | 42260721  |
|   | 6  | 136895475 | 136911913 | NM_007486    | chr6  | 136897547 | 136898311 |
|   | 19 | 13841633  | 13850132  | NM_146989    | chr19 | 13847142  | 13848145  |
|   | 13 | 33662868  | 33671367  | NM_001076790 | chr13 | 33671023  | 33672035  |
|   | 16 | 13688277  | 13696776  | NM_001039521 | chr16 | 13690896  | 13691585  |
| X |    | 69363767  | 69378335  | NM_001025383 | chrX  | 69365402  | 69366101  |
|   | 7  | 45531851  | 45540436  | NM_018876    | chr7  | 45532554  | 45533213  |
|   | 2  | 76158788  | 76167288  | NM_009989    | chr2  | 76161469  | 76162156  |
|   | 7  | 140512609 | 140521108 | NM_146961    | chr7  | 140519890 | 140520613 |
|   | 2  | 25280604  | 25297745  | NM_153557    | chr2  | 25297265  | 25297704  |
|   | 18 | 37593514  | 37632802  | NM_053143    | chr18 | 37614462  | 37615262  |
|   | 11 | 79401407  | 79409906  | NM_175543    | chr11 | 79405795  | 79406578  |
|   | 2  | 36925158  | 36934592  | NM_147051    | chr2  | 36926459  | 36927415  |
|   | 10 | 5731996   | 5740495   | NM_007956    | chr10 | 5738641   | 5739222   |
|   | 17 | 3511696   | 3520195   | NM_146074    | chr17 | 3518782   | 3519556   |
| X |    | 58040039  | 58048538  | BC010759     | chrX  | 58046287  | 58047149  |
|   | 11 | 78798527  | 78807046  | NM_010708    | chr11 | 78805716  | 78806731  |
|   | 8  | 35393227  | 35401776  | NM_019733    | chr8  | 35396407  | 35397438  |
|   | 2  | 24152868  | 24161391  | NM_031167    | chr2  | 24158840  | 24159753  |
|   | 4  | 144931384 | 144939883 | BC096593     | chr4  | 144935702 | 144936358 |
|   | 2  | 180569391 | 180578099 | NM_178254    | chr2  | 180569969 | 180570887 |
|   | 12 | 32217237  | 32225846  | NM_007530    | chr12 | 32220872  | 32221664  |

|          |    |           |           |              |             |           |           |
|----------|----|-----------|-----------|--------------|-------------|-----------|-----------|
| X        |    | 159478585 | 159487236 | NM_027286    | chrX        | 159485063 | 159485861 |
|          | 2  | 25693870  | 25702369  | NM_175462    | chr2        | 25696704  | 25697731  |
|          | 13 | 73089295  | 73097975  | NM_010574    | chr13       | 73092530  | 73093360  |
| Y_random |    | 12127745  | 12137642  | BC100413     | chrY_random | 12127743  | 12128461  |
| Y_random |    | 12059277  | 12069118  | BC100414     | chrY_random | 12066501  | 12067144  |
|          | 2  | 74516817  | 74530412  | NM_010469    | chr2        | 74521724  | 74522530  |
|          | 18 | 37794309  | 37822874  | NM_033586    | chr18       | 37808394  | 37809423  |
|          | 11 | 69205986  | 69220207  | NM_030083    | chr11       | 69210729  | 69211468  |
|          | 11 | 69209042  | 69220429  | NM_025915    | chr11       | 69210729  | 69211468  |
| X        |    | 100022044 | 100030707 | NM_009197    | chrX        | 100023829 | 100024806 |
|          | 4  | 91296085  | 91304592  | BC033506     | chr4        | 91297373  | 91298077  |
|          | 19 | 5659136   | 5669651   | NM_011379    | chr19       | 5665737   | 5666455   |
|          | 14 | 29873201  | 29881700  | BC055456     | chr14       | 29876921  | 29877597  |
| X        |    | 104642984 | 104651483 | BC099952     | chrX        | 104650669 | 104651451 |
|          | 11 | 73267906  | 73276405  | NM_147025    | chr11       | 73269542  | 73270418  |
|          | 3  | 88251423  | 88259922  | BC022753     | chr3        | 88255007  | 88256123  |
|          | 18 | 37593514  | 37632802  | NM_053143    | chr18       | 37616223  | 37617180  |
|          | 12 | 84871638  | 84880137  | NM_134188    | chr12       | 84878452  | 84879090  |
|          | 7  | 57375372  | 57383873  | NM_176942    | chr7        | 57378500  | 57379562  |
|          | 7  | 108044814 | 108053313 | NM_146732    | chr7        | 108046195 | 108047013 |
|          | 7  | 80162030  | 80170529  | NM_145150    | chr7        | 80169101  | 80169922  |
| X        |    | 4509172   | 4517671   | BC117727     | chrX        | 4513238   | 4514294   |
|          | 7  | 103598172 | 103608163 | NM_147097    | chr7        | 103603947 | 103604720 |
|          | 19 | 13715465  | 13723964  | NM_001011832 | chr19       | 13722895  | 13723916  |
|          | 3  | 50537276  | 50545808  | NM_011990    | chr3        | 50544045  | 50544845  |
|          | 18 | 35238863  | 35247405  | NM_009818    | chr18       | 35239925  | 35240767  |
|          | 14 | 52758592  | 52767091  | U07662       | chr14       | 52764279  | 52764965  |
| X        |    | 85659909  | 85668408  | NM_008821    | chrX        | 85660004  | 85660785  |
|          | 1  | 93146481  | 93154980  | NM_001033292 | chr1        | 93151038  | 93151637  |
|          | 12 | 22450725  | 22459224  | NM_001004167 | chr12       | 22454211  | 22454829  |
|          | 13 | 60184391  | 60192988  | NM_008086    | chr13       | 60190647  | 60191414  |
| X        |    | 135722335 | 135730834 | NM_177750    | chrX        | 135722706 | 135723275 |
|          | 10 | 80797762  | 80806261  | BC055405     | chr10       | 80800525  | 80801354  |
|          | 12 | 29201332  | 29215558  | NM_027866    | chr12       | 29205471  | 29206251  |
|          | 7  | 27563345  | 27571844  | NM_001024726 | chr7        | 27564147  | 27565199  |
|          | 16 | 43160672  | 43169171  | BC031114     | chr16       | 43162755  | 43163433  |
|          | 6  | 132524669 | 132538034 | NM_011174    | chr6        | 132533839 | 132534574 |
|          | 1  | 169179700 | 169189419 | NM_019993    | chr1        | 169186440 | 169187366 |
|          | 13 | 61011688  | 61021548  | NM_012007    | chr13       | 61012503  | 61013254  |
|          | 2  | 36192787  | 36201286  | NM_146947    | chr2        | 36196782  | 36197696  |
|          | 7  | 119525075 | 119533724 | U53456       | chr7        | 119531554 | 119532485 |
|          | 3  | 97708280  | 97716954  | NM_010232    | chr3        | 97712785  | 97713639  |
|          | 7  | 17162411  | 17170923  | NM_027210    | chr7        | 17164472  | 17165615  |
|          | 16 | 58976511  | 58985013  | NM_146322    | chr16       | 58979211  | 58980069  |
|          | 7  | 79140779  | 79149308  | NM_018811    | chr7        | 79146165  | 79146911  |
|          | 10 | 57616384  | 57638017  | NM_001034869 | chr10       | 57624421  | 57624843  |
| X        |    | 7954650   | 7963149   | NM_199319    | chrX        | 7957950   | 7958881   |

|          |    |           |           |              |             |           |           |
|----------|----|-----------|-----------|--------------|-------------|-----------|-----------|
|          | 14 | 49990843  | 49999342  | NM_207558    | chr14       | 49994106  | 49994778  |
|          | 11 | 72017749  | 72033866  | NM_026559    | chr11       | 72024851  | 72025437  |
|          | 10 | 83867771  | 83876270  | NM_001004363 | chr10       | 83873620  | 83874235  |
|          | 1  | 191860602 | 191877468 | NM_008937    | chr1        | 191862442 | 191863113 |
| X        |    | 134254869 | 134263368 | NM_013724    | chrX        | 134261889 | 134262666 |
|          | 6  | 140579069 | 140591790 | NM_001005605 | chr6        | 140582548 | 140583423 |
|          | 13 | 58617989  | 58626500  | NM_022317    | chr13       | 58625453  | 58626346  |
|          | 7  | 9621932   | 9630431   | NM_145848    | chr7        | 9622264   | 9623447   |
|          | 10 | 80573788  | 80589546  | NM_007907    | chr10       | 80584148  | 80586304  |
|          | 10 | 129008929 | 129017428 | NM_146931    | chr10       | 129010866 | 129011791 |
| Y_random |    | 11275195  | 11283694  | NM_001017394 | chrY_random | 11277135  | 11278075  |
|          | 11 | 78309315  | 78322207  | NM_011707    | chr11       | 78310069  | 78310870  |
|          | 10 | 80573788  | 80589546  | NM_007907    | chr10       | 80580647  | 80581471  |
|          | 1  | 193885596 | 193894142 | NM_010600    | chr1        | 193893442 | 193894067 |
|          | 8  | 12909888  | 12918434  | NM_178076    | chr8        | 12911701  | 12912394  |
|          | 2  | 109469539 | 109480432 | NM_007540    | chr2        | 109476483 | 109477216 |
|          | 15 | 63887622  | 63896121  | NM_144846    | chr15       | 63892292  | 63893085  |
|          | 11 | 74992504  | 75001004  | NM_027136    | chr11       | 74993876  | 74994474  |
|          | 8  | 98461827  | 98470326  | NM_027640    | chr8        | 98463511  | 98464364  |
|          | 17 | 37175003  | 37189474  | NM_001013575 | chr17       | 37182439  | 37183606  |
|          | 9  | 26743168  | 26751698  | NM_144543    | chr9        | 26748817  | 26749529  |
|          | 11 | 81868046  | 81876640  | NM_011330    | chr11       | 81875921  | 81876511  |
|          | 2  | 125720225 | 125728724 | NM_008008    | chr2        | 125727107 | 125727982 |
|          | 18 | 37794309  | 37822874  | NM_033586    | chr18       | 37795205  | 37796111  |
|          | 11 | 116664105 | 116672604 | NM_178620    | chr11       | 116664967 | 116665657 |
|          | 1  | 176261105 | 176269604 | NM_146761    | chr1        | 176266326 | 176267462 |
|          | 6  | 89999846  | 90008345  | NM_053218    | chr6        | 90001375  | 90002801  |
|          | 7  | 99635247  | 99643746  | NM_146356    | chr7        | 99637235  | 99637959  |
|          | 2  | 164018206 | 164026705 | NM_009301    | chr2        | 164023915 | 164024954 |
|          | 14 | 49240285  | 49248784  | NM_146664    | chr14       | 49241965  | 49242661  |
|          | 18 | 22307048  | 22320406  | NM_027616    | chr18       | 22313255  | 22313951  |
|          | 7  | 51608666  | 51617166  | BC083065     | chr7        | 51613686  | 51614360  |
|          | 6  | 116590246 | 116600596 | NM_026057    | chr6        | 116592083 | 116592888 |
|          | 15 | 56522082  | 56530602  | NM_008216    | chr15       | 56525180  | 56525782  |
|          | 11 | 3090915   | 3099463   | BC046305     | chr11       | 3091143   | 3091778   |
|          | 2  | 85997090  | 86005589  | NM_147017    | chr2        | 86000283  | 86001024  |
|          | 5  | 139791551 | 139800077 | NM_013702    | chr5        | 139799175 | 139800027 |
|          | 2  | 155436784 | 155445284 | NM_011171    | chr2        | 155443406 | 155444239 |
|          | 3  | 85995649  | 86004167  | BC021594     | chr3        | 85998547  | 85999158  |
|          | 5  | 67375762  | 67384261  | NM_008888    | chr5        | 67375986  | 67376775  |
|          | 11 | 121640351 | 121648892 | AB235902     | chr11       | 121647488 | 121648256 |
|          | 14 | 49060089  | 49076823  | NM_146278    | chr14       | 49068055  | 49068701  |
|          | 11 | 4160587   | 4169597   | NM_001039537 | chr11       | 4164893   | 4165638   |
|          | 9  | 103854949 | 103863498 | NM_028721    | chr9        | 103859107 | 103859875 |
|          | 11 | 77345270  | 77353769  | BC019960     | chr11       | 77346508  | 77347587  |
|          | 2  | 66116479  | 66125125  | L42339       | chr2        | 66122906  | 66123529  |
|          | 10 | 74472084  | 74483329  | NM_029781    | chr10       | 74482720  | 74483266  |

|    |           |           |              |       |           |           |
|----|-----------|-----------|--------------|-------|-----------|-----------|
| 3  | 94917111  | 94925610  | BC085188     | chr3  | 94918563  | 94919157  |
| 7  | 104447445 | 104464039 | NM_146379    | chr7  | 104453648 | 104454314 |
| 13 | 22597896  | 22606395  | NM_134217    | chr13 | 22599631  | 22600384  |
| 7  | 47219763  | 47228262  | NM_153095    | chr7  | 47221958  | 47222994  |
| 7  | 48064701  | 48073200  | NM_205795    | chr7  | 48072525  | 48073174  |
| 1  | 193836012 | 193844754 | NM_144814    | chr1  | 193839137 | 193839985 |
| 2  | 85802617  | 85811116  | NM_146579    | chr2  | 85809151  | 85809916  |
| 14 | 20526454  | 20543174  | NM_001007268 | chr14 | 20531004  | 20531673  |
| 4  | 118325871 | 118334370 | NM_207157    | chr4  | 118327711 | 118328803 |
| 17 | 30337104  | 30345627  | NM_025374    | chr17 | 30339236  | 30340073  |
| 17 | 25070480  | 25079127  | NM_031187    | chr17 | 25071932  | 25072701  |
| 1  | 122098235 | 122106734 | AY214462     | chr1  | 122106098 | 122106655 |
| 4  | 62638004  | 62646516  | NM_007443    | chr4  | 62643502  | 62644129  |
| 19 | 13680183  | 13688682  | NM_146636    | chr19 | 13686312  | 13687354  |
| 5  | 30918535  | 30927043  | NM_175675    | chr5  | 30925897  | 30926610  |
| 8  | 87299469  | 87308195  | NM_007578    | chr8  | 87302284  | 87302939  |
| X  | 137550045 | 137558566 | NM_021487    | chrX  | 137556851 | 137557561 |
| 14 | 104985804 | 104994305 | NM_198601    | chr14 | 104991121 | 104991982 |
| 7  | 105015631 | 105024130 | NM_147045    | chr7  | 105022087 | 105022848 |
| 6  | 30677516  | 30690576  | NM_008590    | chr6  | 30684812  | 30685470  |
| 17 | 69055712  | 69064211  | NM_013813    | chr17 | 69056152  | 69056896  |
| 3  | 139137280 | 139145779 | NM_198659    | chr3  | 139141065 | 139141943 |
| 14 | 30074483  | 30083095  | NM_027088    | chr14 | 30079690  | 30080539  |
| 14 | 30077575  | 30086227  | NM_027949    | chr14 | 30079690  | 30080539  |
| 17 | 46751260  | 46759759  | AY081774     | chr17 | 46756580  | 46757495  |
| 11 | 119753182 | 119761723 | NM_130862    | chr11 | 119758056 | 119758710 |
| 8  | 107730197 | 107742350 | NM_145603    | chr8  | 107737401 | 107737919 |
| 4  | 112105527 | 112116947 | NM_177865    | chr4  | 112113917 | 112114571 |
| 17 | 37100706  | 37109205  | NM_146328    | chr17 | 37106817  | 37107673  |
| 6  | 70139262  | 70147761  | BC094049     | chr6  | 70146032  | 70146736  |
| 9  | 24171356  | 24179855  | BC116782     | chr9  | 24176573  | 24177180  |
| 6  | 55299921  | 55308442  | NM_001003685 | chr6  | 55301332  | 55301937  |
| 7  | 104806349 | 104814848 | NM_147043    | chr7  | 104812031 | 104812891 |
| 2  | 74990189  | 74998689  | BC092050     | chr2  | 74992916  | 74993612  |
| 12 | 87989143  | 87997642  | NM_022414    | chr12 | 87991881  | 87992399  |
| 9  | 104193514 | 104202067 | NM_207668    | chr9  | 104194217 | 104195087 |
| 6  | 42741080  | 42749579  | NM_146445    | chr6  | 42743534  | 42744118  |
| 1  | 34378446  | 34393807  | NM_178601    | chr1  | 34381952  | 34382953  |
| 1  | 34381719  | 34390218  | NM_027159    | chr1  | 34381952  | 34382953  |
| 3  | 129864628 | 129875705 | NM_023196    | chr3  | 129865908 | 129866934 |
| 15 | 79429750  | 79438343  | NM_010059    | chr15 | 79435212  | 79435978  |
| 10 | 79167554  | 79176053  | NM_144528    | chr10 | 79167914  | 79168564  |
| 7  | 130817224 | 130825723 | NM_007769    | chr7  | 130821874 | 130822979 |
| 6  | 141205675 | 141214174 | NM_018779    | chr6  | 141207675 | 141208318 |
| 13 | 72426980  | 72435479  | NM_010573    | chr13 | 72430920  | 72431652  |
| 2  | 130863692 | 130884723 | NM_007682    | chr2  | 130884029 | 130884682 |
| 9  | 106511684 | 106520183 | BC115866     | chr9  | 106515349 | 106516223 |

|   |    |           |           |              |       |           |           |
|---|----|-----------|-----------|--------------|-------|-----------|-----------|
| X |    | 131559303 | 131567877 | NM_009052    | chrX  | 131560178 | 131560766 |
|   | 1  | 182765697 | 182785739 | NM_144794    | chr1  | 182778293 | 182778980 |
|   | 13 | 4226986   | 4235485   | NM_001013785 | chr13 | 4229686   | 4230395   |
|   | 7  | 103805203 | 103813702 | NM_147119    | chr7  | 103810352 | 103811158 |
|   | 1  | 58912117  | 58920849  | NM_172656    | chr1  | 58919425  | 58920228  |
|   | 14 | 66693600  | 66702099  | NM_008145    | chr14 | 66699112  | 66699963  |
|   | 2  | 172030814 | 172039321 | NM_025912    | chr2  | 172032919 | 172033692 |
| X |    | 88266553  | 88275052  | NM_010759    | chrX  | 88266754  | 88267509  |
|   | 3  | 139137280 | 139145779 | NM_198659    | chr3  | 139143840 | 139144751 |
|   | 2  | 110161322 | 110169832 | NM_026271    | chr2  | 110163591 | 110164464 |
|   | 6  | 140491581 | 140500080 | BC033481     | chr6  | 140496833 | 140497608 |
|   | 18 | 37593514  | 37632802  | NM_053143    | chr18 | 37630175  | 37630901  |
|   | 11 | 100752971 | 100761601 | NM_213659    | chr11 | 100760292 | 100761065 |
|   | 6  | 43159185  | 43167684  | NM_146370    | chr6  | 43165412  | 43166244  |
|   | 19 | 43488522  | 43497021  | NM_031396    | chr19 | 43495864  | 43496536  |
|   | 5  | 124123605 | 124132114 | NM_030701    | chr5  | 124125200 | 124126233 |
|   | 17 | 23945870  | 23954369  | NM_028056    | chr17 | 23950367  | 23951150  |
|   | 11 | 100933388 | 100941933 | NM_028933    | chr11 | 100935295 | 100936282 |
|   | 14 | 55072197  | 55080696  | NM_010373    | chr14 | 55072612  | 55073497  |
|   | 11 | 6366372   | 6381920   | NM_011221    | chr11 | 6380580   | 6381364   |
|   | 14 | 98175825  | 98184787  | NM_009769    | chr14 | 98181755  | 98182510  |
|   | 6  | 99652142  | 99660641  | NM_008158    | chr6  | 99652136  | 99652770  |
|   | 11 | 55302055  | 55310561  | NM_009720    | chr11 | 55304301  | 55305023  |
|   | 10 | 58785033  | 58801541  | NM_023530    | chr10 | 58791560  | 58792163  |
|   | 16 | 16057867  | 16066411  | NM_146068    | chr16 | 16062825  | 16063571  |
|   | 2  | 36456050  | 36464549  | NM_146945    | chr2  | 36459734  | 36460620  |
|   | 11 | 121245050 | 121253561 | NM_001038699 | chr11 | 121248857 | 121249396 |
| X |    | 87578474  | 87587073  | NM_031171    | chrX  | 87581622  | 87582480  |
|   | 15 | 72371036  | 72379535  | NM_001033876 | chr15 | 72376921  | 72377579  |
|   | 14 | 4277097   | 4285596   | NM_025940    | chr14 | 4280837   | 4281729   |
|   | 15 | 76089344  | 76097883  | NM_028852    | chr15 | 76095767  | 76096364  |
|   | 2  | 111110277 | 111118776 | NM_146908    | chr2  | 111113238 | 111113935 |
| X |    | 5216983   | 5225736   | NM_021431    | chrX  | 5224641   | 5225369   |
|   | 17 | 37298717  | 37311224  | NM_001011830 | chr17 | 37305948  | 37306808  |
|   | 15 | 95480306  | 95488805  | NM_207533    | chr15 | 95480782  | 95481475  |
|   | 13 | 22355811  | 22364310  | NM_134220    | chr13 | 22362727  | 22363252  |
|   | 7  | 140609059 | 140617651 | NM_021282    | chr7  | 140615724 | 140616474 |
|   | 3  | 53949200  | 53957735  | NM_026435    | chr3  | 53951928  | 53953122  |
|   | 4  | 147440344 | 147448965 | NM_001003893 | chr4  | 147443991 | 147444680 |
| X |    | 10450183  | 10484020  | BC049545     | chrX  | 10474702  | 10475436  |
|   | 2  | 39045849  | 39054348  | NM_024209    | chr2  | 39050695  | 39051343  |
|   | 19 | 13544716  | 13553215  | NM_146301    | chr19 | 13546346  | 13547566  |
|   | 7  | 45479648  | 45512317  | NM_028544    | chr7  | 45493780  | 45494433  |
|   | 11 | 16533611  | 16551541  | NM_024475    | chr11 | 16543506  | 16544005  |
|   | 12 | 77446422  | 77454921  | NM_153804    | chr12 | 77453434  | 77454216  |
|   | 18 | 37593514  | 37632802  | NM_053143    | chr18 | 37611246  | 37612724  |
|   | 1  | 169300956 | 169309455 | NM_001013382 | chr1  | 169305201 | 169305837 |



|          |    |           |           |              |             |           |           |
|----------|----|-----------|-----------|--------------|-------------|-----------|-----------|
|          | 4  | 94537889  | 94550205  | NM_010591    | chr4        | 94543049  | 94543933  |
|          | 16 | 59050365  | 59058864  | NM_001011791 | chr16       | 59052089  | 59052720  |
|          | 15 | 40479116  | 40488088  | NM_011766    | chr15       | 40482859  | 40483556  |
|          | 17 | 31581989  | 31590502  | NM_010831    | chr17       | 31584666  | 31585316  |
|          | 14 | 64614537  | 64623119  | NM_028903    | chr14       | 64616098  | 64616701  |
|          | 1  | 79735146  | 79743660  | NM_009255    | chr1        | 79742414  | 79742945  |
|          | 8  | 74598137  | 74611651  | NM_001029873 | chr8        | 74607611  | 74608628  |
|          | 8  | 74599521  | 74609816  | NM_010589    | chr8        | 74607611  | 74608628  |
|          | 18 | 37633626  | 37646832  | NM_053147    | chr18       | 37640355  | 37641425  |
|          | 8  | 48784529  | 48793028  | BC099949     | chr8        | 48788589  | 48789223  |
|          | 18 | 87884543  | 87893042  | AF033381     | chr18       | 87891125  | 87892096  |
|          | 3  | 145690113 | 145698626 | NM_026993    | chr3        | 145692305 | 145693049 |
|          | 6  | 42835132  | 42843631  | NM_146988    | chr6        | 42841318  | 42842389  |
|          | 7  | 133515905 | 133524404 | NM_152944    | chr7        | 133522932 | 133523648 |
|          | 11 | 16533611  | 16551541  | NM_024475    | chr11       | 16542175  | 16542893  |
|          | 2  | 24201406  | 24209905  | NM_177611    | chr2        | 24206957  | 24207599  |
|          | 9  | 69782665  | 69797120  | NM_016787    | chr9        | 69795148  | 69795726  |
| Y_random |    | 11275195  | 11283694  | NM_001017394 | chrY_random | 11278282  | 11279051  |
|          | 4  | 132850456 | 132858955 | NM_133884    | chr4        | 132852100 | 132852853 |
|          | 10 | 82784037  | 82792551  | NM_026579    | chr10       | 82789663  | 82790686  |
|          | 9  | 106074699 | 106083265 | NM_031178    | chr9        | 106074921 | 106075698 |
|          | 2  | 74557819  | 74566419  | NM_010467    | chr2        | 74563830  | 74564504  |
|          | 4  | 148424228 | 148432937 | NM_023051    | chr4        | 148426438 | 148427053 |
| X        |    | 3241098   | 3249629   | BC089532     | chrX        | 3243199   | 3244470   |
|          | 7  | 107948549 | 107957048 | NM_001011810 | chr7        | 107949816 | 107950563 |
| X        |    | 10450183  | 10484020  | BC049545     | chrX        | 10457856  | 10458417  |
|          | 6  | 5669808   | 5678410   | NM_010063    | chr6        | 5677565   | 5678377   |
|          | 11 | 70796661  | 70805221  | NM_007573    | chr11       | 70803617  | 70804415  |
|          | 16 | 91529500  | 91541831  | NM_010256    | chr16       | 91531048  | 91531863  |
|          | 18 | 72473911  | 72482410  | NM_007831    | chr18       | 72476693  | 72477213  |
|          | 15 | 83890616  | 83899115  | NM_029946    | chr15       | 83891699  | 83892773  |
|          | 2  | 163232629 | 163241128 | NM_008261    | chr2        | 163235418 | 163236283 |
|          | 4  | 134952600 | 134961099 | NM_174851    | chr4        | 134957232 | 134957917 |
|          | 5  | 112814779 | 112823488 | DQ167195     | chr5        | 112814798 | 112815463 |
|          | 1  | 40620171  | 40628757  | NM_001033289 | chr1        | 40620595  | 40621214  |
|          | 2  | 111027891 | 111038630 | NM_026248    | chr2        | 111028565 | 111029304 |
|          | 13 | 21348395  | 21356894  | NM_146533    | chr13       | 21351161  | 21352241  |
|          | 19 | 58505217  | 58514609  | NM_010279    | chr19       | 58511158  | 58512176  |
|          | 7  | 107821019 | 107829518 | NM_146734    | chr7        | 107822603 | 107823438 |
|          | 9  | 54500539  | 54509038  | BC022948     | chr9        | 54506224  | 54507038  |
|          | 1  | 113687874 | 113698465 | BC120567     | chr1        | 113694591 | 113695273 |
|          | 4  | 88750924  | 88759423  | NM_001040654 | chr4        | 88755616  | 88756227  |
|          | 1  | 54381017  | 54389516  | NM_001033194 | chr1        | 54384833  | 54385503  |
|          | 11 | 83661064  | 83671654  | NM_009330    | chr11       | 83666006  | 83666746  |
|          | 10 | 40313427  | 40323519  | NM_027442    | chr10       | 40319234  | 40320265  |
|          | 2  | 101427326 | 101435829 | NM_026592    | chr2        | 101434766 | 101435361 |
|          | 11 | 44237486  | 44246008  | NM_008352    | chr11       | 44241019  | 44241682  |

|   |    |           |           |              |       |           |           |
|---|----|-----------|-----------|--------------|-------|-----------|-----------|
|   | 16 | 13266217  | 13274716  | NM_153588    | chr16 | 13272440  | 13273080  |
|   | 1  | 66628068  | 66636600  | NM_025683    | chr1  | 66628469  | 66629140  |
|   | 3  | 88083579  | 88092157  | NM_007529    | chr3  | 88087726  | 88088532  |
|   | 6  | 18810319  | 18818818  | NM_029202    | chr6  | 18810330  | 18810862  |
|   | 15 | 103325068 | 103333831 | NM_008800    | chr15 | 103325150 | 103325774 |
|   | 19 | 11609538  | 11618037  | AF237915     | chr19 | 11615555  | 11616149  |
|   | 11 | 66866266  | 66874789  | NM_025510    | chr11 | 66871621  | 66872216  |
|   | 2  | 111173806 | 111182305 | NM_146381    | chr2  | 111180048 | 111180686 |
|   | 5  | 128909639 | 128918350 | NM_175284    | chr5  | 128912556 | 128913204 |
|   | 2  | 11630116  | 11643516  | BC095982     | chr2  | 11632294  | 11632910  |
|   | 13 | 53477815  | 53486608  | NM_013601    | chr13 | 53478676  | 53479311  |
|   | 1  | 192623160 | 192631659 | NM_021421    | chr1  | 192623379 | 192623973 |
|   | 19 | 57700223  | 57708722  | BC050020     | chr19 | 57700283  | 57701064  |
|   | 2  | 65296939  | 65305438  | L42337       | chr2  | 65297337  | 65297953  |
|   | 17 | 84585457  | 84593956  | NM_026180    | chr17 | 84585681  | 84586270  |
|   | 14 | 121583796 | 121592295 | NM_177817    | chr14 | 121590104 | 121590739 |
|   | 2  | 55245356  | 55255049  | NM_008426    | chr2  | 55246448  | 55247077  |
|   | 11 | 76385070  | 76399922  | NM_198895    | chr11 | 76389024  | 76389645  |
|   | 4  | 45027930  | 45042245  | NM_022811    | chr4  | 45040358  | 45040882  |
|   | 1  | 191860602 | 191877468 | NM_008937    | chr1  | 191871713 | 191872310 |
|   | 6  | 126975161 | 126983660 | NM_010204    | chr6  | 126982611 | 126983214 |
|   | 10 | 19039949  | 19048454  | NM_053008    | chr10 | 19044042  | 19044685  |
|   | 14 | 45741550  | 45758367  | NM_022023    | chr14 | 45748439  | 45749050  |
|   | 14 | 45748108  | 45756620  | NM_026832    | chr14 | 45748439  | 45749050  |
|   | 4  | 118430273 | 118438772 | NM_207570    | chr4  | 118437704 | 118438491 |
|   | 2  | 165770250 | 165778749 | BC027238     | chr2  | 165775777 | 165776402 |
|   | 13 | 70073425  | 70087277  | NM_145354    | chr13 | 70086233  | 70086899  |
|   | 18 | 53295734  | 53304233  | NM_026386    | chr18 | 53299605  | 53300173  |
|   | 10 | 40757500  | 40765999  | NM_199058    | chr10 | 40761379  | 40761978  |
| X |    | 49356519  | 49365032  | NM_019538    | chrX  | 49362997  | 49363607  |
|   | 8  | 73764207  | 73774709  | NM_027560    | chr8  | 73769821  | 73770928  |
|   | 9  | 38243242  | 38251741  | NM_146805    | chr9  | 38247999  | 38248761  |
|   | 13 | 33028879  | 33037518  | NM_011452    | chr13 | 33030493  | 33031111  |
|   | 5  | 140853815 | 140870668 | NM_008494    | chr5  | 140866504 | 140867139 |
|   | 15 | 102758791 | 102767290 | NM_010463    | chr15 | 102758882 | 102759522 |
|   | 12 | 22450725  | 22459224  | NM_001004167 | chr12 | 22456978  | 22457923  |
|   | 5  | 53023839  | 53032414  | NM_025951    | chr5  | 53030929  | 53031620  |
|   | 11 | 53607501  | 53616417  | NM_008390    | chr11 | 53613666  | 53614327  |
|   | 4  | 61003341  | 61011840  | BC037152     | chr4  | 61004913  | 61005713  |
|   | 11 | 85700258  | 85708757  | NM_011536    | chr11 | 85707724  | 85708320  |
| X |    | 3241098   | 3249629   | BC089532     | chrX  | 3246258   | 3247428   |
|   | 13 | 101544269 | 101559126 | NM_008670    | chr13 | 101551383 | 101552065 |
|   | 11 | 101056424 | 101079231 | NM_175638    | chr11 | 101076421 | 101077054 |
|   | 6  | 37453781  | 37462280  | NM_145364    | chr6  | 37455072  | 37455761  |
|   | 9  | 13566584  | 13583449  | NM_026665    | chr9  | 13579588  | 13580243  |
| X |    | 103040863 | 103049362 | NM_199468    | chrX  | 103048680 | 103049338 |
|   | 8  | 26039379  | 26047878  | NM_145949    | chr8  | 26039744  | 26040384  |

|    |           |           |              |       |           |           |
|----|-----------|-----------|--------------|-------|-----------|-----------|
| 7  | 107612145 | 107620644 | NM_146426    | chr7  | 107613922 | 107614567 |
| 8  | 28665984  | 28674483  | NM_029674    | chr8  | 28670029  | 28670688  |
| 17 | 34807458  | 34819403  | NM_013693    | chr17 | 34818209  | 34818844  |
| 7  | 143573884 | 143582383 | NM_203492    | chr7  | 143575218 | 143575903 |
| 1  | 58446966  | 58455473  | NM_008765    | chr1  | 58451696  | 58452634  |
| 1  | 193768741 | 193781114 | NM_181796    | chr1  | 193775001 | 193775839 |
| 4  | 146483799 | 146492298 | BC058858     | chr4  | 146490437 | 146491112 |
| 1  | 177711473 | 177719988 | NM_012012    | chr1  | 177711474 | 177712126 |
| 13 | 26775072  | 26783584  | NM_008232    | chr13 | 26779317  | 26779954  |
| 8  | 64110313  | 64118913  | NM_021506    | chr8  | 64111361  | 64111967  |
| 12 | 70846998  | 70855497  | BC057068     | chr12 | 70848703  | 70849324  |
| 2  | 111051956 | 111060455 | NM_146395    | chr2  | 111057660 | 111058507 |
| 6  | 115320570 | 115329262 | U01841       | chr6  | 115327545 | 115328446 |
| 2  | 66116479  | 66125125  | L42339       | chr2  | 66119721  | 66120340  |
| 1  | 157177048 | 157185662 | NM_011273    | chr1  | 157179066 | 157179769 |
| 17 | 37688530  | 37697029  | NM_146867    | chr17 | 37689778  | 37690557  |
| 17 | 25558009  | 25585342  | NM_145999    | chr17 | 25567906  | 25568496  |
| 5  | 87399798  | 87408297  | AF539752     | chr5  | 87403163  | 87403932  |
| 6  | 118721094 | 118729593 | U17869       | chr6  | 118726141 | 118727027 |
| 12 | 15838707  | 15848335  | NM_144551    | chr12 | 15844575  | 15845208  |
| 7  | 81364669  | 81377794  | NM_021492    | chr7  | 81366067  | 81366702  |
| 15 | 84146486  | 84155031  | NM_022321    | chr15 | 84148746  | 84149352  |
| 9  | 38767611  | 38776110  | NM_146747    | chr9  | 38772956  | 38773708  |
| 6  | 49242939  | 49251490  | NM_175098    | chr6  | 49245074  | 49245653  |
| 2  | 144054476 | 144062975 | NM_181417    | chr2  | 144061618 | 144061965 |
| 6  | 129642122 | 129650629 | NM_010652    | chr6  | 129645915 | 129646614 |
| 2  | 90195502  | 90204001  | NM_146333    | chr2  | 90200466  | 90201149  |
| 2  | 26891597  | 26900170  | NM_025376    | chr2  | 26892611  | 26893247  |
| 15 | 102026711 | 102038800 | NM_153194    | chr15 | 102030416 | 102031044 |
| 6  | 71189333  | 71197838  | NM_009762    | chr6  | 71195069  | 71195621  |
| 17 | 84860325  | 84869135  | NM_011151    | chr17 | 84865757  | 84866358  |
| 6  | 142233559 | 142242058 | BC013594     | chr6  | 142234519 | 142235127 |
| 1  | 74052748  | 74061247  | NM_001034060 | chr1  | 74058803  | 74059429  |
| 9  | 108288585 | 108297084 | NM_001004192 | chr9  | 108293537 | 108294154 |
| 15 | 6327980   | 6336537   | NM_023118    | chr15 | 6330391   | 6330990   |
| 19 | 4705223   | 4713722   | NM_021287    | chr19 | 4711433   | 4712032   |
| 1  | 168516011 | 168524520 | NM_172844    | chr1  | 168517550 | 168518166 |
| X  | 70671332  | 70688024  | NM_178590    | chrX  | 70680177  | 70680774  |
| X  | 70679382  | 70687881  | NM_008062    | chrX  | 70680177  | 70680774  |
| 1  | 196874873 | 196883439 | NM_007758    | chr1  | 196882390 | 196883143 |
| 3  | 89308979  | 89317532  | NM_013605    | chr3  | 89308968  | 89309600  |
| 6  | 85773022  | 85781521  | NM_053097    | chr6  | 85774392  | 85774998  |
| 15 | 94451365  | 94459929  | NM_178789    | chr15 | 94453934  | 94454624  |
| 10 | 119513451 | 119522047 | NM_080446    | chr10 | 119521201 | 119521816 |
| 18 | 37794309  | 37822874  | NM_033586    | chr18 | 37800743  | 37801603  |
| 9  | 103916048 | 103924583 | NM_175324    | chr9  | 103917559 | 103918167 |
| 7  | 41051480  | 41059979  | NM_001033782 | chr7  | 41058681  | 41059266  |

|          |    |           |           |              |             |           |           |
|----------|----|-----------|-----------|--------------|-------------|-----------|-----------|
|          | 7  | 103921674 | 103930173 | NM_146329    | chr7        | 103923368 | 103924241 |
|          | 10 | 61624025  | 61632583  | NM_197996    | chr10       | 61629168  | 61629793  |
| X        |    | 98999682  | 99009451  | BC116811     | chrX        | 99007346  | 99008007  |
|          | 17 | 23541895  | 23550394  | BC027781     | chr17       | 23545620  | 23546224  |
|          | 19 | 41257647  | 41266146  | NM_011904    | chr19       | 41260400  | 41261114  |
|          | 9  | 40203836  | 40212335  | NM_172768    | chr9        | 40208677  | 40209323  |
|          | 13 | 60943675  | 60957558  | NM_009411    | chr13       | 60951316  | 60952009  |
|          | 18 | 63097285  | 63105784  | NM_028017    | chr18       | 63102491  | 63103465  |
|          | 8  | 22514294  | 22522795  | NM_007845    | chr8        | 22521773  | 22522413  |
|          | 1  | 55023828  | 55038390  | NM_010477    | chr1        | 55037367  | 55037940  |
|          | 7  | 139037286 | 139045793 | NM_021302    | chr7        | 139038100 | 139038803 |
| X        |    | 98904623  | 98916395  | NM_001039116 | chrX        | 98909940  | 98910647  |
|          | 8  | 122224465 | 122233014 | NM_024219    | chr8        | 122229070 | 122229461 |
|          | 9  | 25224993  | 25233542  | NM_026189    | chr9        | 25231771  | 25232504  |
|          | 16 | 96566516  | 96575015  | NM_008791    | chr16       | 96574366  | 96574964  |
|          | 15 | 74666375  | 74674874  | NM_001033229 | chr15       | 74666059  | 74666652  |
| Y_random |    | 11275195  | 11283694  | NM_001017394 | chrY_random | 11282196  | 11282729  |
|          | 11 | 43311729  | 43326816  | NM_026979    | chr11       | 43321190  | 43321799  |
|          | 9  | 38338794  | 38347293  | NM_001011523 | chr9        | 38342511  | 38343108  |
|          | 1  | 175930135 | 175938634 | NM_001011844 | chr1        | 175933965 | 175934779 |
|          | 7  | 28095756  | 28104274  | NM_019458    | chr7        | 28101444  | 28102038  |
|          | 7  | 28098934  | 28107433  | NM_026042    | chr7        | 28101444  | 28102038  |
|          | 10 | 77144360  | 77172719  | NM_010670    | chr10       | 77163517  | 77164274  |
|          | 11 | 100573196 | 100593047 | NM_031871    | chr11       | 100581199 | 100581716 |
|          | 9  | 34676681  | 34685180  | NM_001002772 | chr9        | 34678231  | 34678677  |
|          | 14 | 117117055 | 117126137 | NM_177753    | chr14       | 117117401 | 117118056 |
|          | 2  | 127540069 | 127548568 | NM_028765    | chr2        | 127546228 | 127546907 |
|          | 6  | 147488611 | 147497110 | BC024946     | chr6        | 147490633 | 147491677 |
|          | 18 | 67672043  | 67684146  | NM_194355    | chr18       | 67675644  | 67676313  |
|          | 2  | 23994876  | 24011667  | NM_153511    | chr2        | 24008813  | 24009457  |
|          | 4  | 85808015  | 85816523  | NM_172542    | chr4        | 85815202  | 85815795  |
|          | 7  | 101764238 | 101782293 | NM_025605    | chr7        | 101780740 | 101781313 |
|          | 12 | 104801779 | 104810308 | NM_009252    | chr12       | 104804340 | 104804953 |
|          | 5  | 26433602  | 26442101  | NM_207657    | chr5        | 26434755  | 26435692  |
|          | 7  | 23815050  | 23823583  | NM_021307    | chr7        | 23816488  | 23817131  |
|          | 2  | 129981380 | 129989879 | NM_152993    | chr2        | 129984329 | 129984918 |
|          | 5  | 98415171  | 98423670  | NM_029947    | chr5        | 98415786  | 98416574  |
|          | 5  | 146487039 | 146495538 | NM_001008547 | chr5        | 146489241 | 146489879 |
|          | 1  | 129550959 | 129559458 | NM_001033041 | chr1        | 129558406 | 129558986 |
|          | 13 | 38197950  | 38214932  | NM_026382    | chr13       | 38200142  | 38201002  |
|          | 11 | 49631610  | 49640111  | NM_013529    | chr11       | 49638670  | 49639278  |
|          | 13 | 98335788  | 98344672  | NM_007930    | chr13       | 98341795  | 98342474  |
|          | 17 | 36648019  | 36661357  | NM_019439    | chr17       | 36656700  | 36657294  |
|          | 9  | 44883748  | 44892247  | NM_001013390 | chr9        | 44884771  | 44885382  |
|          | 10 | 51360225  | 51376432  | NM_177306    | chr10       | 51366302  | 51366934  |
|          | 2  | 111243981 | 111252480 | NM_001011773 | chr2        | 111251337 | 111251997 |
|          | 15 | 97206100  | 97214599  | BC086317     | chr15       | 97209956  | 97210535  |

|   |    |           |           |              |       |           |           |
|---|----|-----------|-----------|--------------|-------|-----------|-----------|
|   | 6  | 89673844  | 89682343  | NM_053228    | chr6  | 89675396  | 89676124  |
|   | 2  | 163439103 | 163447630 | NM_007398    | chr2  | 163442202 | 163442806 |
|   | 5  | 88843128  | 88851627  | NM_007785    | chr5  | 88843129  | 88843642  |
|   | 15 | 6270771   | 6279270   | NM_198643    | chr15 | 6278586   | 6279241   |
|   | 9  | 20941443  | 20949942  | NM_019798    | chr9  | 20947548  | 20948199  |
|   | 8  | 96084380  | 96092932  | NM_053200    | chr8  | 96090888  | 96091476  |
|   | 7  | 107913939 | 107922438 | NM_146499    | chr7  | 107915533 | 107916361 |
|   | 1  | 75090093  | 75108401  | NM_009447    | chr1  | 75104238  | 75104834  |
|   | 7  | 17124646  | 17133200  | NM_023289    | chr7  | 17131843  | 17132696  |
| X |    | 129505779 | 129514278 | NM_183319    | chrX  | 129510447 | 129511053 |
|   | 6  | 87352070  | 87360569  | NM_026860    | chr6  | 87352754  | 87353346  |
|   | 11 | 58231304  | 58239833  | NM_027239    | chr11 | 58238214  | 58238806  |
|   | 5  | 33415076  | 33423607  | NM_019810    | chr5  | 33421161  | 33421842  |
|   | 3  | 117561364 | 117570180 | NM_029425    | chr3  | 117568838 | 117569433 |
|   | 9  | 21337124  | 21345623  | NM_178619    | chr9  | 21343774  | 21344427  |
|   | 9  | 21340649  | 21349174  | NM_138303    | chr9  | 21343774  | 21344427  |
|   | 7  | 126434519 | 126443018 | NM_029339    | chr7  | 126440206 | 126440871 |
|   | 15 | 74666375  | 74674874  | NM_001033229 | chr15 | 74668415  | 74669299  |
|   | 1  | 37984261  | 37992760  | BC055393     | chr1  | 37987040  | 37987445  |
|   | 16 | 18333980  | 18342500  | NM_013711    | chr16 | 18333976  | 18334688  |
|   | 6  | 78305855  | 78314374  | NM_013893    | chr6  | 78313591  | 78314190  |
|   | 1  | 44160921  | 44169477  | NM_207281    | chr1  | 44163187  | 44163810  |
|   | 9  | 58108611  | 58117334  | NM_010729    | chr9  | 58109142  | 58109825  |
|   | 6  | 113418261 | 113439850 | NM_145826    | chr6  | 113430341 | 113430934 |
|   | 10 | 80415538  | 80424054  | NM_010319    | chr10 | 80418362  | 80419299  |
|   | 6  | 43125253  | 43133752  | NM_146653    | chr6  | 43131113  | 43131823  |
|   | 3  | 141917139 | 141925638 | NM_007560    | chr3  | 141922548 | 141923278 |
|   | 7  | 67630698  | 67639206  | NM_201639    | chr7  | 67630974  | 67631636  |
|   | 16 | 91941180  | 91949694  | NM_017391    | chr16 | 91942211  | 91942900  |
|   | 10 | 41495784  | 41504290  | NM_026643    | chr10 | 41502564  | 41503253  |
|   | 19 | 30292939  | 30301453  | NM_010776    | chr19 | 30295511  | 30296146  |
|   | 8  | 23429320  | 23438640  | NM_026459    | chr8  | 23434228  | 23434921  |
|   | 11 | 83001525  | 83010024  | NM_011409    | chr11 | 83004755  | 83005393  |
|   | 12 | 34536918  | 34545596  | NM_011658    | chr12 | 34541996  | 34542780  |
|   | 7  | 33651242  | 33659745  | NM_178308    | chr7  | 33651250  | 33651973  |
|   | 2  | 162776725 | 162787042 | NM_026630    | chr2  | 162785245 | 162785851 |
|   | 2  | 122300201 | 122308709 | NM_025961    | chr2  | 122307604 | 122308216 |
|   | 11 | 83283303  | 83291802  | NM_027427    | chr11 | 83287134  | 83287753  |
|   | 6  | 35253763  | 35262293  | NM_173375    | chr6  | 35254149  | 35254746  |
|   | 15 | 8237870   | 8246369   | BC055787     | chr15 | 8238105   | 8238765   |
|   | 2  | 146774287 | 146782786 | NM_023504    | chr2  | 146781902 | 146782506 |
|   | 9  | 54527076  | 54538665  | NM_001025375 | chr9  | 54536182  | 54536745  |
|   | 6  | 119534254 | 119542753 | BC002272     | chr6  | 119537193 | 119537955 |
|   | 6  | 82362133  | 82370944  | NM_009313    | chr6  | 82366394  | 82367087  |
|   | 19 | 11957044  | 11965543  | NM_146410    | chr19 | 11957836  | 11958484  |
|   | 7  | 79336282  | 79345786  | NM_017462    | chr7  | 79337782  | 79338366  |
|   | 9  | 115098862 | 115107361 | BC013054     | chr9  | 115101253 | 115101906 |

|   |    |           |           |              |       |           |           |
|---|----|-----------|-----------|--------------|-------|-----------|-----------|
|   | 11 | 82762297  | 82773437  | NM_183201    | chr11 | 82771068  | 82771669  |
| X |    | 10450183  | 10484020  | BC049545     | chrX  | 10470705  | 10471085  |
| X |    | 54371412  | 54379926  | NM_009575    | chrX  | 54376719  | 54377839  |
|   | 11 | 119301790 | 119310289 | NM_177394    | chr11 | 119307170 | 119307816 |
|   | 4  | 144771482 | 144784069 | NM_001013808 | chr4  | 144778351 | 144778979 |
|   | 13 | 117996116 | 118004615 | BC022679     | chr13 | 117999133 | 117999732 |
|   | 2  | 21117478  | 21132850  | NM_177588    | chr2  | 21127754  | 21128552  |
|   | 2  | 21120519  | 21129119  | AY454124     | chr2  | 21127754  | 21128552  |
|   | 5  | 73280039  | 73288538  | NM_173403    | chr5  | 73285787  | 73286404  |
|   | 17 | 25510434  | 25530645  | NM_133719    | chr17 | 25510168  | 25510801  |
|   | 2  | 25074888  | 25083387  | NM_178239    | chr2  | 25077713  | 25078366  |
|   | 12 | 30956881  | 30965380  | NM_172951    | chr12 | 30961514  | 30962109  |
|   | 19 | 57248142  | 57256641  | AF404775     | chr19 | 57251463  | 57252096  |
|   | 3  | 93071629  | 93080128  | NM_001018079 | chr3  | 93079292  | 93079902  |
|   | 10 | 80896986  | 80909266  | NM_134009    | chr10 | 80906038  | 80906628  |
|   | 15 | 80089048  | 80097561  | NM_175109    | chr15 | 80096503  | 80097079  |
|   | 2  | 148421336 | 148429908 | NM_019632    | chr2  | 148425859 | 148426541 |
|   | 8  | 127602229 | 127610748 | NM_026855    | chr8  | 127604049 | 127604709 |
|   | 9  | 105495130 | 105504797 | BC017537     | chr9  | 105497253 | 105497896 |
|   | 16 | 11313226  | 11321725  | NM_028964    | chr16 | 11313649  | 11314416  |
|   | 4  | 41927285  | 41935824  | NM_011014    | chr4  | 41934539  | 41935149  |
|   | 13 | 38197950  | 38214932  | NM_026382    | chr13 | 38198870  | 38199458  |
|   | 1  | 99489872  | 99498382  | NM_133825    | chr1  | 99495124  | 99495725  |
|   | 2  | 87152265  | 87160764  | NM_147029    | chr2  | 87152677  | 87153327  |
|   | 18 | 37794309  | 37822874  | NM_033586    | chr18 | 37819538  | 37820327  |
|   | 6  | 85414407  | 85422926  | NM_028505    | chr6  | 85421435  | 85422064  |
|   | 7  | 126562123 | 126575130 | NM_011538    | chr7  | 126571437 | 126572024 |
|   | 9  | 39321386  | 39329885  | NM_146508    | chr9  | 39323364  | 39323982  |
|   | 1  | 182681826 | 182690325 | NM_145943    | chr1  | 182685956 | 182686572 |
|   | 14 | 20773831  | 20784153  | NM_145459    | chr14 | 20781365  | 20782009  |
|   | 17 | 74311262  | 74319761  | BC005753     | chr17 | 74318419  | 74319015  |
|   | 2  | 68656353  | 68664895  | NM_172856    | chr2  | 68658327  | 68659028  |
|   | 8  | 112925984 | 112934869 | NM_011998    | chr8  | 112934616 | 112935213 |
|   | 7  | 83818022  | 83833782  | BC056981     | chr7  | 83829260  | 83829973  |
|   | 8  | 19188334  | 19201182  | NM_019728    | chr8  | 19191761  | 19192423  |
|   | 6  | 85875372  | 85897258  | NM_176842    | chr6  | 85889737  | 85890373  |
|   | 2  | 155677075 | 155685574 | U33198       | chr2  | 155683728 | 155684320 |
|   | 9  | 14983438  | 14991975  | NM_026955    | chr9  | 14983657  | 14984114  |
|   | 2  | 74557819  | 74566419  | NM_010467    | chr2  | 74558339  | 74558967  |
|   | 11 | 36785167  | 36793666  | NM_011856    | chr11 | 36787619  | 36788336  |
|   | 3  | 92396108  | 92405188  | NM_011469    | chr3  | 92401725  | 92402893  |
|   | 14 | 67031214  | 67039788  | NM_010910    | chr14 | 67033535  | 67034133  |
|   | 13 | 64159902  | 64168421  | NM_175494    | chr13 | 64162074  | 64162848  |
|   | 18 | 36098287  | 36106786  | BC062930     | chr18 | 36105926  | 36106456  |
|   | 7  | 126158123 | 126174559 | NM_023712    | chr7  | 126172714 | 126173374 |
|   | 1  | 93319073  | 93327599  | NM_028718    | chr1  | 93324841  | 93325273  |
|   | 9  | 50094699  | 50103212  | NM_052835    | chr9  | 50096449  | 50097058  |

|   |    |           |           |              |       |           |           |
|---|----|-----------|-----------|--------------|-------|-----------|-----------|
|   | 5  | 139735531 | 139744059 | NM_133349    | chr5  | 139742440 | 139743122 |
|   | 5  | 33415076  | 33423607  | NM_019810    | chr5  | 33415211  | 33415836  |
|   | 7  | 17510898  | 17519397  | NM_011963    | chr7  | 17512327  | 17512939  |
| X |    | 95239384  | 95247883  | NM_199018    | chrX  | 95245217  | 95245989  |
|   | 5  | 121710592 | 121719091 | NM_026129    | chr5  | 121718560 | 121719261 |
|   | 5  | 121717814 | 121726313 | NM_029912    | chr5  | 121718560 | 121719261 |
|   | 9  | 39654376  | 39662875  | NM_146613    | chr9  | 39657275  | 39658017  |
|   | 5  | 135648580 | 135657086 | NM_145414    | chr5  | 135655836 | 135656467 |
|   | 17 | 37100706  | 37109205  | NM_146328    | chr17 | 37105502  | 37106012  |
|   | 7  | 103205877 | 103214376 | NM_146731    | chr7  | 103211430 | 103212119 |
|   | 9  | 7686101   | 7694621   | NM_010810    | chr9  | 7691160   | 7691845   |
|   | 7  | 44698329  | 44706841  | NM_010215    | chr7  | 44703626  | 44704260  |
|   | 14 | 49369005  | 49377504  | NM_146667    | chr14 | 49373439  | 49373819  |
|   | 5  | 122962174 | 122970754 | NM_011026    | chr5  | 122966960 | 122967602 |
|   | 1  | 174171885 | 174180575 | NM_001039484 | chr1  | 174176949 | 174177662 |
|   | 3  | 131289883 | 131298382 | NM_027816    | chr3  | 131297378 | 131298147 |
|   | 10 | 129275205 | 129283704 | NM_207159    | chr10 | 129276124 | 129276737 |
|   | 7  | 120863177 | 120871679 | NM_030691    | chr7  | 120866803 | 120867486 |
|   | 1  | 164644110 | 164655224 | NM_144878    | chr1  | 164644987 | 164645830 |
|   | 7  | 23361076  | 23369575  | NM_030735    | chr7  | 23363274  | 23363851  |
|   | 4  | 95838163  | 95846662  | NM_001004141 | chr4  | 95844178  | 95844767  |
|   | 16 | 90942877  | 90951376  | BC032975     | chr16 | 90942885  | 90943474  |
|   | 1  | 58446966  | 58455473  | NM_008765    | chr1  | 58449843  | 58450457  |
| X |    | 44933631  | 44942205  | NM_173376    | chrX  | 44939883  | 44940476  |
|   | 2  | 58958967  | 58967466  | BC062650     | chr2  | 58964617  | 58965307  |
|   | 4  | 145969893 | 145978392 | BC024323     | chr4  | 145970512 | 145970970 |
| X |    | 88736668  | 88745167  | NM_001034103 | chrX  | 88742136  | 88742734  |
|   | 13 | 61047721  | 61056248  | NM_029636    | chr13 | 61051941  | 61052475  |
|   | 10 | 58203460  | 58211959  | NM_172788    | chr10 | 58206366  | 58206970  |
|   | 7  | 140943715 | 140965994 | NM_178381    | chr7  | 140959730 | 140960377 |
|   | 8  | 87831096  | 87842796  | NM_144929    | chr8  | 87840393  | 87840853  |
|   | 6  | 40983013  | 40994450  | BC055922     | chr6  | 40988915  | 40989689  |
|   | 10 | 43261584  | 43270103  | NM_009846    | chr10 | 43269274  | 43269871  |
|   | 16 | 23230413  | 23238912  | BC027833     | chr16 | 23233531  | 23234288  |
|   | 3  | 131258683 | 131267198 | NM_008212    | chr3  | 131259936 | 131260562 |
|   | 7  | 81364669  | 81377794  | NM_021492    | chr7  | 81370114  | 81370816  |
|   | 5  | 138500043 | 138515732 | NM_001033416 | chr5  | 138512083 | 138512686 |
|   | 5  | 138504339 | 138512838 | NM_016964    | chr5  | 138512083 | 138512686 |
|   | 10 | 97067756  | 97081872  | NM_007884    | chr10 | 97076522  | 97077389  |
|   | 11 | 46530463  | 46538962  | AF399828     | chr11 | 46537201  | 46537820  |
|   | 17 | 28856339  | 28864838  | NM_001002786 | chr17 | 28860382  | 28860999  |
|   | 14 | 68537731  | 68546606  | NM_153514    | chr14 | 68545572  | 68546205  |
|   | 2  | 89048115  | 89056614  | NM_146971    | chr2  | 89049536  | 89050245  |
|   | 11 | 69390176  | 69405584  | NM_011640    | chr11 | 69401668  | 69402342  |
|   | 17 | 9510532   | 9519053   | NM_026226    | chr17 | 9512029   | 9512675   |
|   | 19 | 10547419  | 10555973  | NM_133689    | chr19 | 10548871  | 10549461  |
|   | 7  | 103123827 | 103132348 | NM_001001559 | chr7  | 103124760 | 103125524 |

|    |           |           |              |       |           |           |
|----|-----------|-----------|--------------|-------|-----------|-----------|
| 15 | 75256585  | 75265084  | NM_001039720 | chr15 | 75259519  | 75260161  |
| 3  | 107821934 | 107830565 | NM_145542    | chr3  | 107828783 | 107829131 |
| 12 | 84665722  | 84674221  | BC005747     | chr12 | 84669475  | 84670066  |
| 7  | 142464303 | 142474879 | NM_010514    | chr7  | 142465598 | 142466383 |
| 1  | 62631593  | 62640480  | NM_001077403 | chr1  | 62637405  | 62637985  |
| 9  | 121638562 | 121647082 | NM_029095    | chr9  | 121643527 | 121644099 |
| 19 | 44080009  | 44088510  | NM_001001446 | chr19 | 44086816  | 44087467  |
| 6  | 116679862 | 116688520 | NM_178768    | chr6  | 116682970 | 116683987 |
| 13 | 93229748  | 93238247  | NM_009027    | chr13 | 93231257  | 93231989  |
| 14 | 28844312  | 28854141  | NM_175343    | chr14 | 28846191  | 28846866  |
| 4  | 43855118  | 43863617  | NM_019475    | chr4  | 43860668  | 43861366  |
| 1  | 121347713 | 121356212 | NM_146103    | chr1  | 121354404 | 121354997 |
| 3  | 88891564  | 88908824  | BC059914     | chr3  | 88906847  | 88907531  |
| 4  | 60231412  | 60239951  | NM_008647    | chr4  | 60233821  | 60234311  |
| 18 | 37555759  | 37576153  | NM_053139    | chr18 | 37574585  | 37575306  |
| 10 | 76607713  | 76616217  | NM_009929    | chr10 | 76610305  | 76611023  |
| 17 | 8682159   | 8690658   | AF110507     | chr17 | 8686799   | 8687394   |
| 11 | 89115611  | 89124110  | NM_008711    | chr11 | 89118361  | 89119081  |
| 14 | 27326339  | 27335221  | NM_009524    | chr14 | 27333571  | 27334368  |
| 18 | 37794309  | 37822874  | NM_033586    | chr18 | 37807308  | 37807980  |
| 5  | 31884549  | 31893065  | NM_025796    | chr5  | 31890831  | 31891443  |
| 7  | 27872470  | 27881007  | NM_007991    | chr7  | 27873086  | 27873696  |
| 10 | 84179847  | 84188492  | NM_001024918 | chr10 | 84187998  | 84188461  |
| 8  | 10000605  | 10009125  | NM_033622    | chr8  | 10007844  | 10008459  |
| 19 | 13519035  | 13527534  | NM_146690    | chr19 | 13527258  | 13527869  |
| 4  | 145528370 | 145536936 | NM_001037926 | chr4  | 145535467 | 145536077 |
| 11 | 74983215  | 74991714  | NM_010430    | chr11 | 74987406  | 74988087  |
| 8  | 72194069  | 72202568  | NM_172491    | chr8  | 72200428  | 72201026  |
| 4  | 62695773  | 62704272  | NM_025685    | chr4  | 62699497  | 62700105  |
| 1  | 74816127  | 74839928  | NM_153111    | chr1  | 74826251  | 74826889  |
| 3  | 80995547  | 81005544  | NM_010298    | chr3  | 80997685  | 80998323  |
| 3  | 136260881 | 136269442 | NM_001033350 | chr3  | 136266216 | 136266822 |
| 6  | 83302715  | 83317641  | NM_175277    | chr6  | 83314707  | 83315401  |
| 17 | 73612618  | 73621117  | NM_027864    | chr17 | 73612660  | 73613253  |
| 12 | 77475087  | 77483586  | BC030417     | chr12 | 77482136  | 77482793  |
| 19 | 60520400  | 60528967  | NM_201615    | chr19 | 60527492  | 60528117  |
| 14 | 49558234  | 49566733  | NM_146299    | chr14 | 49561440  | 49562036  |
| 18 | 24091696  | 24101850  | NM_027007    | chr18 | 24099647  | 24100237  |
| 4  | 145969893 | 145978392 | BC024323     | chr4  | 145971873 | 145972551 |
| X  | 10450183  | 10484020  | BC049545     | chrX  | 10465482  | 10466092  |
| 15 | 9472015   | 9480583   | NM_008372    | chr15 | 9479999   | 9480546   |
| 7  | 5404933   | 5414532   | NM_030742    | chr7  | 5406052   | 5406685   |
| 8  | 75242022  | 75250521  | NM_008452    | chr8  | 75243317  | 75244007  |
| 12 | 81431319  | 81440150  | BC110634     | chr12 | 81437976  | 81438627  |
| 1  | 135847926 | 135856452 | NM_021355    | chr1  | 135848486 | 135849489 |
| 2  | 165089068 | 165097599 | NM_029021    | chr2  | 165095685 | 165096233 |
| 16 | 21799952  | 21808451  | NM_172821    | chr16 | 21801933  | 21802376  |



|    |           |           |              |       |           |           |
|----|-----------|-----------|--------------|-------|-----------|-----------|
| 15 | 27405402  | 27414198  | NM_020332    | chr15 | 27411102  | 27411892  |
| 2  | 93132790  | 93141346  | NM_183180    | chr2  | 93133695  | 93134309  |
| 11 | 93851237  | 93859762  | NM_011289    | chr11 | 93855284  | 93855893  |
| 11 | 93854295  | 93862866  | NM_001025428 | chr11 | 93855284  | 93855893  |
| 3  | 100008493 | 100016992 | NM_028892    | chr3  | 100014907 | 100015524 |
| 2  | 36627922  | 36641099  | NM_206903    | chr2  | 36632853  | 36633451  |
| 8  | 47790440  | 47799488  | NM_173789    | chr8  | 47792763  | 47793726  |
| 3  | 157463680 | 157478860 | NM_017381    | chr3  | 157466862 | 157467552 |
| 2  | 58380044  | 58388543  | L15436       | chr2  | 58383894  | 58384706  |
| 4  | 143426824 | 143435323 | NM_201258    | chr4  | 143432732 | 143433499 |
| 8  | 72194069  | 72202568  | NM_172491    | chr8  | 72194506  | 72195124  |
| 8  | 83903273  | 83911772  | NM_173782    | chr8  | 83907606  | 83908255  |
| 8  | 83908081  | 83916652  | NM_027554    | chr8  | 83907606  | 83908255  |
| 9  | 38674660  | 38683161  | NM_146272    | chr9  | 38677689  | 38678348  |
| 5  | 27374180  | 27382679  | NM_207282    | chr5  | 27376280  | 27376927  |
| 4  | 55365157  | 55373682  | NM_009011    | chr4  | 55370752  | 55371449  |
| 17 | 33585946  | 33594445  | NM_001013793 | chr17 | 33590939  | 33591658  |
| 7  | 108112352 | 108120851 | NM_146497    | chr7  | 108114030 | 108114623 |
| 1  | 99589456  | 99606434  | NM_173760    | chr1  | 99590623  | 99591259  |
| 17 | 83537722  | 83546221  | NM_153512    | chr17 | 83542283  | 83543329  |
| 9  | 72803176  | 72811675  | BC006717     | chr9  | 72804566  | 72805173  |
| 15 | 73247867  | 73262166  | BC030180     | chr15 | 73249528  | 73250287  |
| 3  | 37566304  | 37574803  | AY027557     | chr3  | 37568231  | 37568704  |
| 7  | 11951364  | 11960902  | NM_145819    | chr7  | 11954024  | 11954635  |
| 9  | 39206004  | 39214503  | NM_146331    | chr9  | 39212979  | 39213544  |
| 3  | 133023257 | 133031758 | NM_027927    | chr3  | 133030947 | 133031532 |
| 3  | 133026547 | 133035339 | NM_026231    | chr3  | 133030947 | 133031532 |
| 7  | 104224660 | 104238467 | NM_175648    | chr7  | 104229865 | 104230461 |
| 2  | 74557819  | 74566419  | NM_010467    | chr2  | 74562555  | 74563535  |
| 17 | 35135293  | 35143821  | NM_020576    | chr17 | 35135411  | 35136030  |
| 17 | 20386205  | 20394704  | NM_134191    | chr17 | 20393260  | 20393928  |
| 9  | 107087461 | 107095960 | NM_153413    | chr9  | 107090078 | 107090667 |
| 18 | 20384350  | 20392849  | NM_181680    | chr18 | 20388287  | 20388624  |
| 12 | 89302456  | 89310955  | BC060719     | chr12 | 89302451  | 89303030  |
| 16 | 59239408  | 59247910  | NM_146486    | chr16 | 59245695  | 59246438  |
| 9  | 5302860   | 5311373   | NM_007609    | chr9  | 5308268   | 5308963   |
| 10 | 78498187  | 78506686  | NM_001004362 | chr10 | 78504285  | 78505164  |
| 17 | 37505601  | 37514100  | NM_146377    | chr17 | 37505617  | 37506178  |
| 8  | 87901185  | 87921383  | NM_145388    | chr8  | 87909233  | 87909839  |
| 11 | 44356387  | 44370863  | NM_028862    | chr11 | 44365458  | 44366074  |
| 6  | 43140490  | 43148989  | NM_146369    | chr6  | 43146857  | 43147465  |
| 15 | 8653524   | 8663945   | NM_148938    | chr15 | 8656434   | 8657044   |
| 18 | 37794309  | 37822874  | NM_033586    | chr18 | 37811497  | 37812099  |
| 7  | 81726514  | 81735143  | NM_145375    | chr7  | 81729482  | 81729877  |
| 2  | 90830466  | 90839029  | NM_009023    | chr2  | 90831436  | 90832025  |
| 2  | 177433628 | 177446649 | BC124559     | chr2  | 177439750 | 177440280 |
| 13 | 41836816  | 41845315  | BC027755     | chr13 | 41838735  | 41839327  |

|   |    |           |           |              |       |           |           |
|---|----|-----------|-----------|--------------|-------|-----------|-----------|
|   | 6  | 40363241  | 40371740  | NM_175528    | chr6  | 40370290  | 40370980  |
|   | 6  | 40366548  | 40375148  | NM_201370    | chr6  | 40370290  | 40370980  |
|   | 13 | 25057469  | 25065968  | NM_177577    | chr13 | 25062150  | 25062735  |
|   | 19 | 5142652   | 5151151   | BC034670     | chr19 | 5148845   | 5149516   |
|   | 11 | 106886324 | 106894823 | BC060715     | chr11 | 106886663 | 106887261 |
|   | 18 | 7863237   | 7871914   | NM_153085    | chr18 | 7868618   | 7869257   |
|   | 8  | 24217292  | 24225812  | NM_008872    | chr8  | 24218829  | 24219519  |
|   | 7  | 140222429 | 140230928 | NM_146519    | chr7  | 140226374 | 140227198 |
|   | 17 | 23976426  | 23984947  | NM_007634    | chr17 | 23984271  | 23984890  |
|   | 7  | 33445573  | 33454072  | NM_177446    | chr7  | 33453504  | 33454030  |
|   | 3  | 40996560  | 41005092  | NM_028494    | chr3  | 40997970  | 40998561  |
|   | 2  | 87869747  | 87878246  | NM_146644    | chr2  | 87870716  | 87871337  |
|   | 17 | 53150502  | 53160241  | NM_028232    | chr17 | 53152941  | 53153710  |
|   | 11 | 99623483  | 99631982  | NM_027087    | chr11 | 99623094  | 99623691  |
|   | 9  | 54491521  | 54500195  | NM_021422    | chr9  | 54494421  | 54495025  |
|   | 6  | 40814602  | 40823101  | NM_139296    | chr6  | 40815795  | 40816405  |
|   | 10 | 10768647  | 10778546  | NM_016976    | chr10 | 10770000  | 10770781  |
|   | 13 | 55422355  | 55430854  | NM_029303    | chr13 | 55424017  | 55424608  |
|   | 14 | 11136002  | 11145111  | NM_080433    | chr14 | 11137215  | 11137899  |
|   | 17 | 34652179  | 34660782  | NM_013600    | chr17 | 34653145  | 34654067  |
| X |    | 62907824  | 62916323  | NM_198863    | chrX  | 62914652  | 62915334  |
|   | 10 | 80099313  | 80108395  | NM_027829    | chr10 | 80104171  | 80104768  |
|   | 10 | 80102450  | 80119355  | BC058238     | chr10 | 80104171  | 80104768  |
|   | 2  | 79927279  | 79936314  | NM_016744    | chr2  | 79932894  | 79933621  |
|   | 6  | 14845349  | 14854219  | NM_053242    | chr6  | 14847228  | 14847838  |
|   | 10 | 79251734  | 79267645  | NM_001077363 | chr10 | 79256086  | 79256893  |
|   | 6  | 24692356  | 24705379  | NM_029848    | chr6  | 24693332  | 24693996  |
|   | 9  | 14604647  | 14613146  | NM_010287    | chr9  | 14610652  | 14611330  |
|   | 7  | 25075964  | 25084484  | BC059093     | chr7  | 25081880  | 25082668  |
|   | 3  | 89295134  | 89303659  | NM_013691    | chr3  | 89300163  | 89300801  |
|   | 3  | 89297333  | 89305853  | NM_013604    | chr3  | 89300163  | 89300801  |
|   | 4  | 106052970 | 106061581 | NM_053272    | chr4  | 106060088 | 106060680 |
|   | 1  | 164401398 | 164413475 | NM_016796    | chr1  | 164412385 | 164412982 |
| X |    | 143233392 | 143241891 | BC109131     | chrX  | 143237996 | 143238627 |
|   | 6  | 87332991  | 87341509  | NM_025467    | chr6  | 87336429  | 87337059  |
|   | 2  | 60351601  | 60360117  | NM_008867    | chr2  | 60355028  | 60355654  |
|   | 2  | 25389321  | 25408108  | NM_001005424 | chr2  | 25395374  | 25395966  |
|   | 18 | 37440355  | 37448912  | NM_053130    | chr18 | 37446428  | 37447354  |
| X |    | 57151371  | 57159870  | NM_009237    | chrX  | 57152496  | 57153078  |
|   | 6  | 89981392  | 89989891  | NM_053219    | chr6  | 89987270  | 89987944  |
| X |    | 69749806  | 69758305  | NM_177236    | chrX  | 69753957  | 69754543  |
|   | 14 | 49042530  | 49051029  | NM_146319    | chr14 | 49048704  | 49049383  |
|   | 8  | 48232590  | 48241107  | NM_008391    | chr8  | 48235839  | 48236495  |
|   | 7  | 16183893  | 16192407  | NM_011155    | chr7  | 16183534  | 16184184  |
|   | 7  | 47893120  | 47901623  | NM_207540    | chr7  | 47893108  | 47893532  |
|   | 19 | 59396531  | 59405030  | NM_001033222 | chr19 | 59398102  | 59398808  |
|   | 17 | 26928838  | 26938007  | NM_146075    | chr17 | 26937197  | 26937827  |

|          |    |           |           |              |             |           |           |
|----------|----|-----------|-----------|--------------|-------------|-----------|-----------|
|          | 17 | 37407122  | 37415621  | NM_147062    | chr17       | 37410787  | 37411587  |
|          | 10 | 60478716  | 60489919  | NM_025273    | chr10       | 60481771  | 60482256  |
| Y_random |    | 11608280  | 11616797  | NM_001017393 | chrY_random | 11616735  | 11617371  |
| X        |    | 96926659  | 96935219  | NM_023608    | chrX        | 96933586  | 96934215  |
|          | 10 | 78431927  | 78440426  | NM_147041    | chr10       | 78438263  | 78438914  |
|          | 14 | 50326873  | 50335372  | NM_009495    | chr14       | 50332034  | 50332708  |
|          | 7  | 24778518  | 24787058  | NM_008168    | chr7        | 24777960  | 24778596  |
|          | 5  | 123743943 | 123752442 | NM_001033461 | chr5        | 123749204 | 123749828 |
|          | 3  | 49850958  | 49859476  | NM_130448    | chr3        | 49851488  | 49852082  |
|          | 10 | 126935009 | 126943508 | NM_183297    | chr10       | 126935465 | 126935990 |
|          | 5  | 124228257 | 124236756 | NM_145070    | chr5        | 124233078 | 124233683 |
|          | 10 | 120431064 | 120439789 | NM_011915    | chr10       | 120438693 | 120439310 |
|          | 11 | 65617370  | 65626657  | NM_026107    | chr11       | 65620035  | 65620624  |
|          | 8  | 13031285  | 13039843  | NM_007972    | chr8        | 13039464  | 13039802  |
|          | 18 | 37593514  | 37632802  | NM_053143    | chr18       | 37606056  | 37606692  |
|          | 11 | 97897758  | 97906257  | BC004087     | chr11       | 97900301  | 97900907  |
|          | 19 | 58990676  | 58999175  | NM_178689    | chr19       | 58990732  | 58991339  |
|          | 7  | 104432044 | 104440543 | NM_147048    | chr7        | 104438045 | 104438669 |
|          | 2  | 5590819   | 5599318   | AY273822     | chr2        | 5595370   | 5596011   |
|          | 17 | 37274078  | 37282577  | NM_213721    | chr17       | 37280373  | 37281191  |
|          | 15 | 84541836  | 84550367  | NM_028455    | chr15       | 84549552  | 84550041  |
| X        |    | 34143837  | 34152397  | NM_023894    | chrX        | 34144679  | 34145337  |
|          | 1  | 155309429 | 155317932 | NM_028749    | chr1        | 155315071 | 155315670 |
|          | 2  | 130752487 | 130761255 | NM_033615    | chr2        | 130753233 | 130753822 |
|          | 10 | 75263737  | 75272259  | NM_029472    | chr10       | 75268405  | 75268933  |
|          | 7  | 78446343  | 78454842  | BC006942     | chr7        | 78452187  | 78453064  |
|          | 7  | 78448989  | 78457488  | NM_008746    | chr7        | 78452187  | 78453064  |
|          | 7  | 113299043 | 113307566 | NM_026143    | chr7        | 113304569 | 113305198 |
|          | 2  | 38530297  | 38542513  | NM_139051    | chr2        | 38533193  | 38533812  |
| X        |    | 87578474  | 87587073  | NM_031171    | chrX        | 87580369  | 87580978  |
|          | 7  | 67630698  | 67639206  | NM_201639    | chr7        | 67632266  | 67632997  |
|          | 15 | 102331105 | 102363059 | NM_009582    | chr15       | 102360295 | 102361033 |
|          | 13 | 61011688  | 61021548  | NM_012007    | chr13       | 61015959  | 61016568  |
|          | 4  | 41881585  | 41891712  | NM_016673    | chr4        | 41890370  | 41891039  |
|          | 11 | 78510206  | 78519568  | NM_008702    | chr11       | 78512414  | 78513055  |
|          | 11 | 54108198  | 54116702  | NM_010556    | chr11       | 54109638  | 54110230  |
|          | 18 | 64572559  | 64581058  | NM_007444    | chr18       | 64574118  | 64574798  |
|          | 5  | 89385873  | 89394381  | NM_008644    | chr5        | 89393669  | 89394333  |
|          | 18 | 24081940  | 24090450  | BC092539     | chr18       | 24087943  | 24088540  |
|          | 2  | 181304642 | 181313801 | NM_023684    | chr2        | 181309060 | 181309662 |
|          | 10 | 77144360  | 77172719  | NM_010670    | chr10       | 77157643  | 77158402  |
|          | 3  | 20431728  | 20440231  | NM_007753    | chr3        | 20433581  | 20434374  |
|          | 1  | 58148943  | 58157515  | NM_023631    | chr1        | 58154150  | 58154728  |
|          | 12 | 33727027  | 33735526  | NM_028139    | chr12       | 33733578  | 33734569  |
|          | 4  | 108492619 | 108501236 | NM_146150    | chr4        | 108497346 | 108497936 |
|          | 19 | 22502137  | 22517804  | NM_177341    | chr19       | 22508194  | 22508783  |
|          | 10 | 72044189  | 72052694  | NM_025635    | chr10       | 72049474  | 72050177  |

|   |    |           |           |              |       |           |           |
|---|----|-----------|-----------|--------------|-------|-----------|-----------|
|   | 11 | 82875307  | 82883806  | NM_011408    | chr11 | 82879847  | 82880674  |
|   | 18 | 37633626  | 37646832  | NM_053147    | chr18 | 37638059  | 37638736  |
|   | 11 | 61307600  | 61316434  | NM_011841    | chr11 | 61310832  | 61311707  |
|   | 8  | 86930148  | 86941084  | NM_016671    | chr8  | 86934914  | 86935380  |
|   | 12 | 57607651  | 57616210  | NM_011041    | chr12 | 57610887  | 57611489  |
|   | 9  | 111213636 | 111222135 | BC086653     | chr9  | 111216669 | 111217266 |
|   | 13 | 95152549  | 95161048  | NM_172589    | chr13 | 95156257  | 95156857  |
|   | 2  | 158466849 | 158479006 | NM_027975    | chr2  | 158473487 | 158474090 |
|   | 7  | 23757534  | 23766033  | NM_203489    | chr7  | 23761136  | 23761751  |
|   | 14 | 118135543 | 118148646 | BC055394     | chr14 | 118137559 | 118138170 |
|   | 15 | 97733799  | 97742330  | NM_009504    | chr15 | 97739822  | 97740241  |
|   | 12 | 114410160 | 114418669 | BC085312     | chr12 | 114412270 | 114412958 |
|   | 11 | 74020985  | 74029484  | NM_146711    | chr11 | 74024751  | 74025391  |
|   | 2  | 90064768  | 90073267  | NM_146793    | chr2  | 90066525  | 90067173  |
|   | 7  | 107888456 | 107896955 | NM_146735    | chr7  | 107894795 | 107895453 |
|   | 2  | 165050825 | 165059324 | NM_001005425 | chr2  | 165055609 | 165056063 |
| X |    | 20865859  | 20874416  | NM_020049    | chrX  | 20869976  | 20870655  |
|   | 14 | 112190445 | 112198968 | BC092045     | chr14 | 112196502 | 112197103 |
|   | 11 | 92908500  | 92918687  | NM_028296    | chr11 | 92908519  | 92909112  |
|   | 8  | 13835850  | 13844349  | NM_153093    | chr8  | 13840204  | 13841186  |
|   | 16 | 36582733  | 36591298  | NM_019388    | chr16 | 36584270  | 36584838  |
|   | 17 | 33385819  | 33394455  | NM_020581    | chr17 | 33387686  | 33388624  |
|   | 11 | 73163950  | 73172449  | NM_146923    | chr11 | 73170242  | 73170831  |
| X |    | 89921831  | 89930493  | NM_211138    | chrX  | 89924968  | 89925621  |
|   | 10 | 79939720  | 79948253  | NM_026094    | chr10 | 79941827  | 79942430  |
|   | 19 | 55177967  | 55192788  | M77003       | chr19 | 55178794  | 55179430  |
|   | 13 | 102044663 | 102053168 | BC012687     | chr13 | 102045399 | 102046201 |
|   | 2  | 25044144  | 25052653  | NM_146116    | chr2  | 25044194  | 25044795  |
|   | 13 | 35742778  | 35751277  | BC062123     | chr13 | 35746272  | 35747402  |
|   | 19 | 12955178  | 12963677  | NM_146704    | chr19 | 12956769  | 12957369  |
|   | 2  | 146774287 | 146782786 | NM_023504    | chr2  | 146774671 | 146775256 |
|   | 2  | 30232059  | 30240718  | NM_138748    | chr2  | 30238425  | 30239191  |
|   | 2  | 30235005  | 30243757  | NM_007760    | chr2  | 30238425  | 30239191  |
|   | 6  | 7640681   | 7649199   | NM_012055    | chr6  | 7643039   | 7643643   |
|   | 18 | 37050158  | 37058657  | NM_198117    | chr18 | 37056533  | 37057294  |
|   | 9  | 39876031  | 39884530  | NM_146855    | chr9  | 39877633  | 39878226  |
|   | 8  | 89748919  | 89757418  | BC004022     | chr8  | 89751034  | 89751664  |
|   | 6  | 132404930 | 132413429 | NM_001004160 | chr6  | 132409742 | 132410447 |
|   | 15 | 98139083  | 98147582  | NM_001011778 | chr15 | 98140531  | 98141123  |
|   | 2  | 11162398  | 11170897  | AB062122     | chr2  | 11165976  | 11166576  |
|   | 7  | 131328111 | 131354053 | NM_009774    | chr7  | 131332156 | 131333062 |
|   | 19 | 12156393  | 12172682  | NM_146809    | chr19 | 12156547  | 12157062  |
|   | 5  | 3004565   | 3013064   | NM_134232    | chr5  | 3007704   | 3008371   |
|   | 1  | 54991315  | 54999814  | NM_001039710 | chr1  | 54997752  | 54998303  |
|   | 4  | 11309021  | 11320619  | NM_194055    | chr4  | 11311995  | 11312601  |
|   | 19 | 45123450  | 45131960  | NM_178929    | chr19 | 45131269  | 45131910  |
|   | 6  | 13784561  | 13795848  | NM_145066    | chr6  | 13786901  | 13787750  |

|          |    |           |           |              |             |           |           |
|----------|----|-----------|-----------|--------------|-------------|-----------|-----------|
|          | 18 | 46335233  | 46343856  | NM_178872    | chr18       | 46335975  | 46336582  |
|          | 11 | 106128120 | 106136760 | NM_008339    | chr11       | 106134520 | 106135117 |
|          | 5  | 33415076  | 33423607  | NM_019810    | chr5        | 33418443  | 33419036  |
|          | 7  | 9315704   | 9324203   | NM_134229    | chr7        | 9321742   | 9322339   |
|          | 6  | 115638978 | 115648254 | NM_029780    | chr6        | 115642028 | 115642591 |
|          | 15 | 86011408  | 86019907  | NM_145475    | chr15       | 86018279  | 86019011  |
|          | 11 | 87703590  | 87716117  | NM_146413    | chr11       | 87705715  | 87706358  |
|          | 2  | 67240841  | 67249340  | NM_001024618 | chr2        | 67248861  | 67249318  |
|          | 8  | 3746431   | 3754984   | NM_133238    | chr8        | 3753073   | 3753662   |
|          | 4  | 106806309 | 106814862 | NM_145550    | chr4        | 106811861 | 106812458 |
|          | 11 | 118156091 | 118164624 | NM_021440    | chr11       | 118158350 | 118159144 |
|          | 4  | 120023866 | 120033151 | NM_177570    | chr4        | 120029529 | 120030173 |
| X        |    | 130521479 | 130529978 | BC115763     | chrX        | 130527782 | 130528368 |
|          | 10 | 23759916  | 23768415  | NM_001010830 | chr10       | 23761232  | 23761822  |
|          | 5  | 38110119  | 38118834  | NM_010835    | chr5        | 38117451  | 38117937  |
|          | 1  | 91843249  | 91851748  | NM_139152    | chr1        | 91849454  | 91849994  |
|          | 11 | 73184946  | 73193445  | NM_146922    | chr11       | 73193047  | 73193409  |
|          | 15 | 97069141  | 97077640  | NM_172293    | chr15       | 97072211  | 97072798  |
|          | 15 | 97072480  | 97081321  | NM_178114    | chr15       | 97072211  | 97072798  |
| X        |    | 19839393  | 19848220  | NM_011049    | chrX        | 19839672  | 19840202  |
|          | 11 | 54935534  | 54944073  | NM_010299    | chr11       | 54940570  | 54941165  |
|          | 8  | 108401884 | 108410482 | NM_008289    | chr8        | 108407524 | 108408109 |
|          | 2  | 111027891 | 111038630 | NM_026248    | chr2        | 111030237 | 111030831 |
|          | 2  | 148435802 | 148444301 | NM_177655    | chr2        | 148442922 | 148443518 |
|          | 11 | 9085945   | 9094444   | NM_178259    | chr11       | 9093216   | 9093943   |
|          | 18 | 37555759  | 37576153  | NM_053139    | chr18       | 37567872  | 37568638  |
|          | 1  | 94469892  | 94485247  | NM_153114    | chr1        | 94476741  | 94477449  |
|          | 2  | 67912567  | 67921066  | NM_020283    | chr2        | 67914227  | 67914922  |
|          | 18 | 21081635  | 21090134  | NM_026301    | chr18       | 21081708  | 21082383  |
|          | 4  | 49700584  | 49709117  | NM_001004025 | chr4        | 49700945  | 49701561  |
| Y_random |    | 12059277  | 12069118  | BC100414     | chrY_random | 12068016  | 12068871  |
|          | 11 | 80966497  | 80975098  | NM_007384    | chr11       | 80967028  | 80967986  |
|          | 6  | 55375558  | 55384372  | NM_007407    | chr6        | 55379499  | 55380120  |
|          | 17 | 25019994  | 25039476  | NM_178372    | chr17       | 25036673  | 25037287  |
|          | 6  | 24692356  | 24705379  | NM_029848    | chr6        | 24699284  | 24699887  |
|          | 6  | 89981392  | 89989891  | NM_053219    | chr6        | 89988319  | 89989082  |
|          | 10 | 27758236  | 27766735  | NM_008983    | chr10       | 27760175  | 27760799  |
|          | 10 | 57616384  | 57638017  | NM_001034869 | chr10       | 57625214  | 57625849  |
|          | 10 | 61176722  | 61185303  | NM_207000    | chr10       | 61178155  | 61178765  |
|          | 1  | 154146331 | 154154900 | NM_025677    | chr1        | 154151694 | 154152157 |
| X        |    | 129399563 | 129408198 | NM_133196    | chrX        | 129400059 | 129400806 |
|          | 11 | 59423161  | 59431660  | NM_001011740 | chr11       | 59430058  | 59430602  |
| X        |    | 74341581  | 74350093  | NM_008754    | chrX        | 74346836  | 74347446  |
|          | 19 | 56769622  | 56778121  | NM_007419    | chr19       | 56777373  | 56778071  |
|          | 19 | 13590694  | 13599193  | NM_207575    | chr19       | 13596816  | 13597506  |
|          | 11 | 109172884 | 109181529 | NM_010303    | chr11       | 109179186 | 109179805 |
|          | 17 | 22569305  | 22577816  | BC078460     | chr17       | 22577364  | 22577895  |

|    |           |           |              |       |           |           |
|----|-----------|-----------|--------------|-------|-----------|-----------|
| 17 | 22903662  | 22912161  | D10632       | chr17 | 22909812  | 22910337  |
| 7  | 28536750  | 28545429  | NM_010706    | chr7  | 28538363  | 28538958  |
| 4  | 65669313  | 65677812  | AF116573     | chr4  | 65673646  | 65674230  |
| 16 | 57673224  | 57681756  | NM_007739    | chr16 | 57674509  | 57675106  |
| 6  | 136136705 | 136145204 | NM_008171    | chr6  | 136137685 | 136138296 |
| 10 | 3585449   | 3594035   | AF400247     | chr10 | 3587060   | 3587661   |
| 16 | 56808315  | 56817117  | NM_019631    | chr16 | 56815680  | 56816274  |
| 7  | 140268592 | 140277091 | NM_147026    | chr7  | 140270915 | 140271506 |
| 9  | 57479273  | 57487792  | NM_009993    | chr9  | 57480963  | 57481334  |
| 16 | 92380993  | 92389505  | NM_172469    | chr16 | 92383276  | 92383834  |
| 15 | 32285853  | 32294352  | BC065137     | chr15 | 32290153  | 32290793  |
| 6  | 43140490  | 43148989  | NM_146369    | chr6  | 43143579  | 43144365  |
|    | 13362071  | 13370606  | BC100482     | chrX  | 13367189  | 13367889  |
| 17 | 36776199  | 36784698  | BC104057     | chr17 | 36783876  | 36784601  |
| 5  | 40041225  | 40049724  | NM_010474    | chr5  | 40044007  | 40044743  |
| 5  | 36776278  | 36784777  | NM_024478    | chr5  | 36782300  | 36782899  |
| 7  | 106582149 | 106590648 | NM_001011862 | chr7  | 106585687 | 106586770 |
| 6  | 99689325  | 99697855  | NM_015768    | chr6  | 99691207  | 99691773  |
| 13 | 58810219  | 58820428  | NM_008745    | chr13 | 58816450  | 58817105  |
| 3  | 157463680 | 157478860 | NM_017381    | chr3  | 157468041 | 157468650 |
| 2  | 89048115  | 89056614  | NM_146971    | chr2  | 89048255  | 89048840  |
| 2  | 73458694  | 73467213  | NM_175752    | chr2  | 73461603  | 73462214  |
| 18 | 37414814  | 37435955  | NM_053128    | chr18 | 37427654  | 37428544  |
| 16 | 87237381  | 87245929  | NM_026366    | chr16 | 87244986  | 87245582  |
| 13 | 43489446  | 43497945  | NM_019930    | chr13 | 43492334  | 43492937  |
| 7  | 127664295 | 127673971 | NM_146259    | chr7  | 127672635 | 127673243 |
| 3  | 60611078  | 60619577  | AF231110     | chr3  | 60614704  | 60615314  |
| 9  | 39067684  | 39076183  | NM_001011756 | chr9  | 39068898  | 39069654  |
| 11 | 72080300  | 72088799  | NM_001004148 | chr11 | 72086158  | 72086713  |
| 12 | 84871638  | 84880137  | NM_134188    | chr12 | 84877573  | 84878237  |
| 9  | 19109256  | 19117755  | NM_146282    | chr9  | 19113377  | 19114465  |
| 3  | 57380303  | 57395848  | NM_008536    | chr3  | 57383358  | 57384134  |
| 6  | 76424743  | 76433293  | NM_153762    | chr6  | 76429129  | 76430002  |
| 3  | 106948139 | 106956638 | NM_146489    | chr3  | 106953718 | 106954318 |
| 3  | 19454609  | 19463108  | NM_008802    | chr3  | 19457010  | 19457863  |
| 4  | 84349558  | 84358164  | NM_175275    | chr4  | 84355998  | 84356610  |
| 1  | 88411132  | 88419672  | NM_008801    | chr1  | 88418930  | 88419668  |
| 11 | 78071951  | 78080488  | NM_001002004 | chr11 | 78079102  | 78079854  |
| 2  | 87434085  | 87442584  | NM_146836    | chr2  | 87435578  | 87436221  |
| 12 | 113582339 | 113590868 | NM_024223    | chr12 | 113590453 | 113590825 |
| 17 | 43090855  | 43099354  | NM_198418    | chr17 | 43090990  | 43091640  |
| 17 | 23888860  | 23903038  | NM_172935    | chr17 | 23898976  | 23899568  |
| 3  | 102133207 | 102141837 | NM_178777    | chr3  | 102136876 | 102137571 |
| 9  | 15360050  | 15368549  | NM_181816    | chr9  | 15360069  | 15360682  |
| 13 | 74469480  | 74477979  | NM_182839    | chr13 | 74477523  | 74477861  |
| 6  | 30677516  | 30690576  | NM_008590    | chr6  | 30686317  | 30686935  |
| 2  | 88527937  | 88536436  | NM_001005225 | chr2  | 88528937  | 88529542  |

X

|          |    |           |           |              |             |           |           |
|----------|----|-----------|-----------|--------------|-------------|-----------|-----------|
|          | 7  | 108397486 | 108405985 | NM_001011871 | chr7        | 108403697 | 108404367 |
|          | 6  | 50493561  | 50509848  | NM_007808    | chr6        | 50493835  | 50494441  |
|          | 4  | 128086652 | 128098266 | NM_177758    | chr4        | 128088530 | 128089121 |
|          | 3  | 55000461  | 55009816  | NM_177854    | chr3        | 55000874  | 55001478  |
|          | 7  | 101262209 | 101270708 | NM_198096    | chr7        | 101263924 | 101264531 |
|          | 1  | 74816127  | 74839928  | NM_153111    | chr1        | 74816416  | 74817017  |
|          | 9  | 113751480 | 113759979 | BC026688     | chr9        | 113757584 | 113758225 |
|          | 11 | 83576320  | 83584819  | BC003942     | chr11       | 83581744  | 83582337  |
|          | 6  | 89981392  | 89989891  | NM_053219    | chr6        | 89986115  | 89986717  |
|          | 4  | 100988611 | 100997110 | BC064460     | chr4        | 100989305 | 100990166 |
| X        |    | 159775099 | 159784709 | NM_026853    | chrX        | 159780651 | 159781280 |
|          | 1  | 74816127  | 74839928  | NM_153111    | chr1        | 74838302  | 74838900  |
|          | 18 | 37593514  | 37632802  | NM_053143    | chr18       | 37600171  | 37600976  |
|          | 15 | 94366655  | 94377670  | NM_172437    | chr15       | 94374993  | 94375612  |
|          | 4  | 69410012  | 69418519  | NM_019641    | chr4        | 69411026  | 69411710  |
|          | 19 | 3761421   | 3770665   | NM_144871    | chr19       | 3765185   | 3765779   |
|          | 4  | 45845416  | 45853915  | NM_018741    | chr4        | 45848325  | 45848908  |
|          | 9  | 38462869  | 38476984  | NM_172767    | chr9        | 38476190  | 38476880  |
|          | 3  | 134760394 | 134768922 | NM_021382    | chr3        | 134767972 | 134768586 |
|          | 3  | 107401084 | 107409583 | BC028547     | chr3        | 107408657 | 107409252 |
|          | 15 | 82848405  | 82856904  | NM_028728    | chr15       | 82853471  | 82854075  |
|          | 12 | 84871638  | 84880137  | NM_134188    | chr12       | 84874620  | 84875386  |
| Y_random |    | 1402748   | 1411247   | NM_001037748 | chrY_random | 1404249   | 1404910   |
|          | 2  | 136076880 | 136085401 | NM_172858    | chr2        | 136077936 | 136078523 |
|          | 15 | 89415695  | 89425672  | NM_026817    | chr15       | 89416063  | 89416761  |
|          | 1  | 108802531 | 108811040 | NM_172852    | chr1        | 108805570 | 108806174 |
|          | 3  | 92418543  | 92428136  | NM_011470    | chr3        | 92423712  | 92424530  |
|          | 18 | 37593514  | 37632802  | NM_053143    | chr18       | 37603836  | 37604513  |
|          | 11 | 62542514  | 62551288  | NM_133208    | chr11       | 62543957  | 62544641  |
|          | 14 | 61244572  | 61253073  | NM_173419    | chr14       | 61250202  | 61250796  |
|          | 9  | 50758704  | 50767303  | NM_178710    | chr9        | 50766147  | 50766691  |
|          | 13 | 74423864  | 74432363  | NM_027704    | chr13       | 74427193  | 74427703  |
|          | 1  | 132287731 | 132296286 | NM_010016    | chr1        | 132289304 | 132289922 |
|          | 8  | 74551368  | 74562598  | BC058348     | chr8        | 74561017  | 74561616  |
|          | 7  | 43426681  | 43435180  | NM_001008549 | chr7        | 43429537  | 43430262  |
|          | 7  | 35102871  | 35111527  | NM_178643    | chr7        | 35109757  | 35110407  |
|          | 14 | 51330379  | 51338878  | NM_146431    | chr14       | 51333494  | 51334046  |
|          | 10 | 12774986  | 12783606  | NM_009538    | chr10       | 12781202  | 12781861  |
|          | 6  | 40512872  | 40521412  | NM_001038604 | chr6        | 40515913  | 40516577  |
|          | 2  | 86016048  | 86024547  | NM_146582    | chr2        | 86017216  | 86018232  |
|          | 19 | 4833415   | 4841914   | NM_207268    | chr19       | 4841265   | 4841865   |
|          | 19 | 4836788   | 4845322   | NM_016892    | chr19       | 4841265   | 4841865   |
|          | 10 | 128386798 | 128395297 | NM_146861    | chr10       | 128391657 | 128392582 |
|          | 3  | 88083579  | 88092157  | NM_007529    | chr3        | 88085017  | 88085726  |
|          | 7  | 135484280 | 135492779 | U36758       | chr7        | 135489340 | 135489957 |
|          | 16 | 56396851  | 56405350  | NM_001014423 | chr16       | 56397952  | 56398548  |
|          | 4  | 49536325  | 49544909  | NM_145547    | chr4        | 49543115  | 49543888  |

|   |    |           |           |              |       |           |           |
|---|----|-----------|-----------|--------------|-------|-----------|-----------|
|   | 4  | 49539661  | 49548183  | NM_178603    | chr4  | 49543115  | 49543888  |
|   | 14 | 50929492  | 50948684  | NM_027248    | chr14 | 50938630  | 50939157  |
|   | 14 | 50932816  | 50941315  | NM_001033805 | chr14 | 50938630  | 50939157  |
|   | 17 | 20386205  | 20394704  | NM_134191    | chr17 | 20387119  | 20387731  |
|   | 10 | 84526542  | 84535072  | NM_001013028 | chr10 | 84527374  | 84527977  |
|   | 10 | 84526719  | 84538287  | NM_010214    | chr10 | 84527374  | 84527977  |
|   | 1  | 94412738  | 94429426  | NM_146490    | chr1  | 94419502  | 94420091  |
|   | 17 | 56443902  | 56452407  | NM_144858    | chr17 | 56448006  | 56448659  |
|   | 17 | 37350919  | 37359418  | NM_146629    | chr17 | 37356845  | 37357527  |
|   | 8  | 11633162  | 11641726  | NM_133971    | chr8  | 11638206  | 11638685  |
|   | 4  | 144771482 | 144784069 | NM_001013808 | chr4  | 144782488 | 144783136 |
|   | 2  | 181156706 | 181176405 | BC052532     | chr2  | 181165951 | 181166542 |
|   | 2  | 6044907   | 6056844   | NM_144883    | chr2  | 6046227   | 6046969   |
|   | 3  | 88586621  | 88595234  | NM_001002011 | chr3  | 88588257  | 88588918  |
|   | 17 | 15403664  | 15414145  | NM_007690    | chr17 | 15412532  | 15413215  |
|   | 19 | 13765848  | 13774347  | NM_146345    | chr19 | 13770297  | 13770910  |
|   | 16 | 23134096  | 23142675  | NM_145933    | chr16 | 23136463  | 23137099  |
| X |    | 74235010  | 74243509  | NM_027768    | chrX  | 74241643  | 74242291  |
|   | 7  | 108354471 | 108362970 | NM_001011858 | chr7  | 108354928 | 108355527 |
|   | 13 | 59589034  | 59597546  | NM_030153    | chr13 | 59594499  | 59595155  |
|   | 9  | 18036669  | 18045180  | NM_025844    | chr9  | 18042923  | 18043541  |
|   | 10 | 36825804  | 36834342  | NM_008538    | chr10 | 36829221  | 36829809  |
|   | 9  | 69557316  | 69566049  | NM_022378    | chr9  | 69558448  | 69559410  |
|   | 6  | 30886646  | 30895145  | DQ534758     | chr6  | 30893803  | 30894408  |
|   | 19 | 6220401   | 6228900   | NM_130453    | chr19 | 6225819   | 6226422   |
|   | 5  | 122962174 | 122970754 | NM_011026    | chr5  | 122969048 | 122969653 |
|   | 4  | 122679807 | 122693514 | NM_174998    | chr4  | 122683953 | 122684538 |
|   | 10 | 24523030  | 24531552  | NM_134005    | chr10 | 24528286  | 24528920  |
|   | 17 | 13141000  | 13149499  | BC061173     | chr17 | 13147869  | 13148475  |
|   | 8  | 72015650  | 72024211  | NM_153054    | chr8  | 72021988  | 72022601  |
|   | 7  | 17688250  | 17696749  | NM_054060    | chr7  | 17693669  | 17694259  |
|   | 18 | 66982975  | 66991841  | NM_016977    | chr18 | 66983674  | 66984280  |
|   | 13 | 22089343  | 22097842  | NM_145850    | chr13 | 22095217  | 22096082  |
|   | 7  | 47893120  | 47901623  | NM_207540    | chr7  | 47894283  | 47894686  |
|   | 19 | 43716786  | 43725285  | BC023172     | chr19 | 43724558  | 43725192  |
|   | 7  | 63815308  | 63823865  | NM_021366    | chr7  | 63823068  | 63823554  |
|   | 6  | 140376577 | 140389004 | NM_144920    | chr6  | 140383838 | 140384351 |
|   | 13 | 33325542  | 33334041  | NM_183197    | chr13 | 33328640  | 33329454  |
|   | 2  | 111243981 | 111252480 | NM_001011773 | chr2  | 111249272 | 111249928 |
|   | 6  | 42761490  | 42769989  | NM_147064    | chr6  | 42767686  | 42768400  |
|   | 19 | 53991618  | 54000691  | NM_019658    | chr19 | 53994573  | 53995204  |
|   | 9  | 37489807  | 37498306  | NM_146882    | chr9  | 37491277  | 37491807  |
|   | 17 | 37661145  | 37669644  | NM_146327    | chr17 | 37666619  | 37667204  |
|   | 9  | 57557506  | 57569997  | NM_007713    | chr9  | 57563838  | 57564443  |
|   | 19 | 44158257  | 44166780  | NM_007700    | chr19 | 44165190  | 44166007  |
|   | 4  | 60634199  | 60642721  | BC099597     | chr4  | 60635868  | 60636616  |
|   | 15 | 98921518  | 98930017  | NM_176835    | chr15 | 98925375  | 98926159  |



|   |    |           |                        |       |           |           |
|---|----|-----------|------------------------|-------|-----------|-----------|
|   | 11 | 17086847  | 17095346 BC002267      | chr11 | 17094690  | 17095183  |
|   | 12 | 57607651  | 57616210 NM_011041     | chr12 | 57609859  | 57610465  |
| X |    | 79738144  | 79746643 AB032764      | chrX  | 79740443  | 79740972  |
|   | 9  | 123697768 | 123706267 NM_148925    | chr9  | 123698854 | 123699458 |
|   | 7  | 27308618  | 27318595 NM_007434     | chr7  | 27316879  | 27317511  |
|   | 1  | 58331673  | 58340196 NM_025824     | chr1  | 58335746  | 58336417  |
| X |    | 69540736  | 69549235 NM_031493     | chrX  | 69544639  | 69545255  |
|   | 15 | 52305817  | 52314316 BC100335      | chr15 | 52307643  | 52308342  |
|   | 2  | 24792071  | 24800596 NM_146251     | chr2  | 24796055  | 24796655  |
|   | 2  | 24794547  | 24803107 NM_001031808  | chr2  | 24796055  | 24796655  |
|   | 1  | 39344957  | 39355915 U88873        | chr1  | 39347135  | 39347728  |
|   | 11 | 114609014 | 114617513 NM_181749    | chr11 | 114610888 | 114611478 |
|   | 11 | 114609466 | 114617982 NM_028055    | chr11 | 114610888 | 114611478 |
|   | 7  | 33720144  | 33728702 NM_203502     | chr7  | 33720827  | 33721449  |
|   | 11 | 73798302  | 73806801 NM_146710     | chr11 | 73803377  | 73803987  |
|   | 11 | 4054371   | 4062896 NM_026175      | chr11 | 4061037   | 4061635   |
|   | 11 | 4057797   | 4066296 NM_177616      | chr11 | 4061037   | 4061635   |
|   | 6  | 126498473 | 126507056 NM_145983    | chr6  | 126504637 | 126505494 |
|   | 7  | 44989923  | 45018697 NM_013520     | chr7  | 45017591  | 45018210  |
|   | 7  | 45016396  | 45040099 NM_182993     | chr7  | 45017591  | 45018210  |
|   | 5  | 106695687 | 106704752 NM_001005477 | chr5  | 106702692 | 106703285 |
|   | 15 | 101472915 | 101481414 NM_001004170 | chr15 | 101474149 | 101474750 |
|   | 13 | 20474558  | 20483057 NM_198093     | chr13 | 20480152  | 20480739  |
|   | 11 | 40571091  | 40579822 NM_026023     | chr11 | 40575040  | 40575643  |
|   | 11 | 40574310  | 40582845 NM_013552     | chr11 | 40575040  | 40575643  |
|   | 10 | 118851094 | 118859873 NM_133442    | chr10 | 118856105 | 118856851 |
|   | 11 | 73591021  | 73599520 NM_147009     | chr11 | 73596023  | 73596625  |
|   | 19 | 36182440  | 36190986 NM_013468     | chr19 | 36188602  | 36189187  |
|   | 5  | 120968622 | 120978286 NM_008052    | chr5  | 120973481 | 120974073 |
| X |    | 92652180  | 92661591 NM_010417     | chrX  | 92660489  | 92661100  |
|   | 9  | 38519828  | 38528327 NM_146782     | chr9  | 38525891  | 38526513  |
|   | 12 | 66138122  | 66146834 NM_027614     | chr12 | 66138139  | 66138814  |
|   | 1  | 193885596 | 193894142 NM_010600    | chr1  | 193890810 | 193891455 |
|   | 18 | 20513739  | 20522344 NM_181682     | chr18 | 20519909  | 20520607  |
|   | 7  | 97565883  | 97574382 NM_023671     | chr7  | 97567784  | 97568390  |
|   | 12 | 79604515  | 79613014 NM_027597     | chr12 | 79606796  | 79607393  |
|   | 2  | 120693849 | 120702451 NM_010761    | chr2  | 120695771 | 120696369 |
|   | 8  | 126287498 | 126300170 NM_023279    | chr8  | 126288933 | 126289499 |
|   | 9  | 107535194 | 107543716 NM_008140    | chr9  | 107538670 | 107539258 |
|   | 17 | 56143625  | 56152191 NM_011483     | chr17 | 56150557  | 56151156  |
|   | 1  | 79548488  | 79556996 NM_183027     | chr1  | 79552989  | 79553483  |
|   | 2  | 174397558 | 174406211 NM_007903    | chr2  | 174398053 | 174398447 |
| X |    | 98316184  | 98324683 NM_027181     | chrX  | 98322308  | 98322893  |
|   | 13 | 4520076   | 4528579 NM_054080      | chr13 | 4525875   | 4526490   |
|   | 7  | 104485478 | 104493977 NM_147075    | chr7  | 104492118 | 104492717 |
|   | 12 | 104297940 | 104312000 NM_009245    | chr12 | 104300121 | 104300560 |
|   | 5  | 143591861 | 143600366 NM_028379    | chr5  | 143594047 | 143594721 |

|          |    |           |                        |             |           |           |
|----------|----|-----------|------------------------|-------------|-----------|-----------|
|          | 1  | 46774758  | 46783257 BC059214      | chr1        | 46782422  | 46782987  |
|          | 4  | 42775779  | 42784278 NM_011888     | chr4        | 42783806  | 42784362  |
|          | 10 | 19305444  | 19313943 NM_178258     | chr10       | 19312459  | 19313186  |
| Y_random |    | 12127745  | 12137642 BC100413      | chrY_random | 12135662  | 12136198  |
|          | 2  | 71324284  | 71332925 NM_010053     | chr2        | 71327667  | 71328546  |
|          | 10 | 19594566  | 19603078 NM_008822     | chr10       | 19597998  | 19598612  |
|          | 16 | 87436526  | 87445251 NM_144854     | chr16       | 87438977  | 87439574  |
|          | 6  | 89981392  | 89989891 NM_053219     | chr6        | 89982371  | 89983245  |
|          | 9  | 30815167  | 30823666 NM_177768     | chr9        | 30823077  | 30823623  |
|          | 1  | 184802852 | 184811974 AF186107     | chr1        | 184805886 | 184806482 |
|          | 19 | 38973124  | 38981623 BC033574      | chr19       | 38978533  | 38979144  |
|          | 8  | 127400876 | 127409416 NM_029746    | chr8        | 127406317 | 127406927 |
|          | 7  | 104555838 | 104564337 NM_146748    | chr7        | 104555891 | 104556504 |
|          | 12 | 111304242 | 111312741 BC024365     | chr12       | 111309924 | 111310317 |
|          | 2  | 71324284  | 71332925 NM_010053     | chr2        | 71324607  | 71325153  |
|          | 6  | 87459442  | 87467941 NM_175476     | chr6        | 87466637  | 87467286  |
|          | 2  | 152228983 | 152237482 NM_001001444 | chr2        | 152229468 | 152230077 |
|          | 18 | 43883658  | 43892165 NM_054038     | chr18       | 43888642  | 43889239  |
|          | 1  | 120449491 | 120457999 NM_023755    | chr1        | 120455304 | 120455886 |
|          | 2  | 132499577 | 132513496 NM_175113    | chr2        | 132508388 | 132509077 |
|          | 15 | 83420377  | 83428886 NM_183017     | chr15       | 83427070  | 83427755  |
|          | 7  | 33445573  | 33454072 NM_177446     | chr7        | 33452528  | 33453341  |
|          | 4  | 47223263  | 47231792 NM_009928     | chr4        | 47227531  | 47227930  |
|          | 7  | 30236886  | 30249772 NM_178252     | chr7        | 30243282  | 30243880  |
|          | 14 | 64905355  | 64913854 NM_172604     | chr14       | 64906341  | 64906957  |
|          | 1  | 94444287  | 94452786 NM_206896     | chr1        | 94450326  | 94450930  |
|          | 17 | 13141000  | 13149499 BC061173      | chr17       | 13145022  | 13145613  |
|          | 1  | 10702645  | 10711157 NM_177834     | chr1        | 10708622  | 10709207  |
|          | 9  | 103617468 | 103625967 NM_178638    | chr9        | 103623452 | 103624111 |
|          | 4  | 47489761  | 47498300 NM_024171     | chr4        | 47490477  | 47491082  |
| X        |    | 6530286   | 6538785 NM_019461      | chrX        | 6530632   | 6531459   |
| X        |    | 34143837  | 34152397 NM_023894     | chrX        | 34147759  | 34148346  |
|          | 7  | 44452928  | 44461661 NM_008422     | chr7        | 44454647  | 44455238  |
|          | 2  | 25516047  | 25531387 NM_023326     | chr2        | 25529790  | 25530391  |
|          | 13 | 55100405  | 55115917 NM_011307     | chr13       | 55108992  | 55109593  |
|          | 5  | 33415076  | 33423607 NM_019810     | chr5        | 33422592  | 33423301  |

| gene overlap percent | region overlap percent | length(bps) | probes in region | p-value(region) |            |
|----------------------|------------------------|-------------|------------------|-----------------|------------|
| 0.124235             |                        | 1           | 1056             | 26              | 0.00118289 |
| 0.138948             |                        | 1           | 1183             | 28              | 0.00336329 |
| 0.100706             |                        | 1           | 856              | 18              | 0.00342508 |
| 0.14495              |                        | 1           | 1237             | 31              | 0.00488162 |
| 0.115529             |                        | 1           | 982              | 35              | 0.00492576 |
| 0.162892             |                        | 1           | 1388             | 39              | 0.00492576 |
| 0.139432             |                        | 1           | 1192             | 41              | 0.00534948 |
| 0.295294             |                        | 1           | 2510             | 70              | 0.00560548 |
| 0.149709             |                        | 1           | 1339             | 38              | 0.00597624 |
| 0.0705673            |                        | 1           | 1270             | 32              | 0.00599389 |
| 0.109445             |                        | 1           | 934              | 26              | 0.00694727 |
| 0.111699             |                        | 1           | 950              | 26              | 0.00700023 |
| 0.121096             |                        | 1           | 1109             | 30              | 0.00717678 |
| 0.0846494            |                        | 1           | 1206             | 33              | 0.00718561 |
| 0.09964              |                        | 1           | 858              | 19              | 0.00782119 |
| 0.100716             |                        | 1           | 858              | 19              | 0.00782119 |
| 0.100224             |                        | 1           | 2863             | 78              | 0.00793595 |
| 0.135164             |                        | 1           | 1152             | 29              | 0.00798008 |
| 0.103348             |                        | 1           | 889              | 25              | 0.0081125  |
| 0.338342             |                        | 1           | 4909             | 153             | 0.00839498 |
| 0.198971             |                        | 1           | 1701             | 43              | 0.00867746 |
| 0.0780158            | 0.40682                | 1           | 1701             | 43              | 0.00867746 |
| 0.0816471            |                        | 1           | 694              | 13              | 0.0091718  |
| 0.104118             |                        | 1           | 885              | 25              | 0.00926008 |
| 0.127765             |                        | 1           | 1086             | 30              | 0.00931304 |
| 0.132588             | 0.805575               | 1           | 1399             | 37              | 0.00948959 |
| 0.0605571            |                        | 1           | 600              | 16              | 0.00959552 |
| 0.0672337            |                        | 1           | 585              | 17              | 0.00965731 |
| 0.107263             |                        | 1           | 923              | 25              | 0.00997511 |
| 0.112759             |                        | 1           | 973              | 23              | 0.00998393 |
| 0.0677647            |                        | 1           | 576              | 11              | 0.00999276 |
| 0.0814118            |                        | 1           | 692              | 20              | 0.00999276 |
| 0.179436             |                        | 1           | 1527             | 43              | 0.0100104  |
| 0.119176             |                        | 1           | 1013             | 24              | 0.010187   |
| 0.131765             |                        | 1           | 1120             | 26              | 0.0101958  |
| 0.284824             |                        | 1           | 2421             | 67              | 0.0102311  |
| 0.113046             |                        | 1           | 1493             | 42              | 0.0102576  |
| 0.0978621            |                        | 1           | 856              | 22              | 0.0102752  |
| 0.092356             |                        | 1           | 795              | 21              | 0.0103106  |
| 0.131412             |                        | 1           | 1117             | 32              | 0.0103635  |
| 0.106568             |                        | 1           | 907              | 26              | 0.0104253  |
| 0.129351             |                        | 1           | 1100             | 20              | 0.0107961  |
| 0.186824             |                        | 1           | 1588             | 45              | 0.0108402  |
| 0.0494118            |                        | 1           | 420              | 11              | 0.0108932  |

|            |          |      |    |           |
|------------|----------|------|----|-----------|
| 0.122      | 1        | 1037 | 26 | 0.0109108 |
| 0.0439684  | 1        | 1256 | 32 | 0.0114581 |
| 0.0802433  | 1        | 686  | 19 | 0.011723  |
| 0.0773393  | 1        | 686  | 19 | 0.011723  |
| 0.121237   | 1        | 1035 | 29 | 0.0117583 |
| 0.130235   | 1        | 1107 | 30 | 0.0118201 |
| 0.104117   | 1        | 918  | 25 | 0.0120937 |
| 0.0922769  | 1        | 785  | 22 | 0.0121908 |
| 0.206471   | 1        | 1755 | 38 | 0.0121908 |
| 0.0829615  | 1        | 1692 | 47 | 0.0122614 |
| 0.132558   | 1        | 1129 | 32 | 0.0124468 |
| 0.147882   | 1        | 1257 | 36 | 0.0124733 |
| 0.0398726  | 1        | 1139 | 32 | 0.0125439 |
| 0.114879   | 1        | 979  | 22 | 0.0126057 |
| 0.0684571  | 1        | 1481 | 32 | 0.0126322 |
| 0.0776869  | 1        | 1197 | 33 | 0.0126498 |
| 0.217228   | 1        | 1856 | 44 | 0.0126587 |
| 0.131529   | 1        | 1118 | 27 | 0.0128264 |
| 0.0559821  | 1        | 1327 | 37 | 0.0128617 |
| 0.116859   | 1        | 994  | 28 | 0.012897  |
| 0.0851765  | 1        | 724  | 20 | 0.0129323 |
| 0.062969   | 0.741713 | 724  | 20 | 0.0129323 |
| 0.102471   | 1        | 871  | 21 | 0.0129323 |
| 0.131176   | 1        | 1115 | 29 | 0.0129676 |
| 0.129749   | 1        | 1103 | 31 | 0.0130736 |
| 0.131765   | 1        | 1120 | 30 | 0.0133031 |
| 0.0858474  | 1        | 737  | 17 | 0.0134973 |
| 0.00704391 | 0.12605  | 476  | 10 | 0.0137003 |
| 0.0493554  | 1        | 1049 | 29 | 0.0137092 |
| 0.0983529  | 1        | 836  | 24 | 0.0138769 |
| 0.0415294  | 1        | 353  | 10 | 0.0147508 |
| 0.100706   | 1        | 856  | 24 | 0.0149273 |
| 0.0812941  | 1        | 691  | 20 | 0.0152893 |
| 0.120353   | 1        | 1023 | 29 | 0.0153069 |
| 0.113939   | 1        | 976  | 26 | 0.0153422 |
| 0.13926    | 1        | 1543 | 41 | 0.015404  |
| 0.0971765  | 1        | 826  | 22 | 0.0154394 |
| 0.112561   | 1        | 1190 | 33 | 0.0155188 |
| 0.0615653  | 1        | 1025 | 28 | 0.0155364 |
| 0.161916   | 1        | 1403 | 36 | 0.0155806 |
| 0.0890588  | 1        | 757  | 19 | 0.0155982 |
| 0.0563895  | 1        | 988  | 28 | 0.01566   |
| 0.114991   | 1        | 988  | 28 | 0.01566   |
| 0.118471   | 1        | 1007 | 22 | 0.0156689 |
| 0.11       | 1        | 935  | 25 | 0.015713  |
| 0.155176   | 1        | 1319 | 32 | 0.0158101 |
| 0.137412   | 1        | 1168 | 33 | 0.0158366 |

|           |          |      |    |           |
|-----------|----------|------|----|-----------|
| 0.125412  | 1        | 1066 | 28 | 0.015916  |
| 0.124471  | 1        | 1058 | 30 | 0.0159866 |
| 0.107352  | 1        | 917  | 21 | 0.0159955 |
| 0.0882353 | 0.657895 | 1140 | 32 | 0.0160573 |
| 0.114752  | 1        | 1054 | 24 | 0.0164104 |
| 0.0897647 | 1        | 763  | 19 | 0.0164369 |
| 0.116991  | 1        | 997  | 28 | 0.016534  |
| 0.0821176 | 1        | 698  | 20 | 0.0165516 |
| 0.100752  | 1        | 1005 | 28 | 0.0166222 |
| 0.125294  | 1        | 1066 | 29 | 0.0166929 |
| 0.0544296 | 1        | 854  | 19 | 0.0166929 |
| 0.100471  | 1        | 854  | 19 | 0.0166929 |
| 0.134118  | 1        | 1140 | 32 | 0.0167105 |
| 0.0964449 | 1        | 822  | 23 | 0.0167105 |
| 0.0927059 | 1        | 788  | 22 | 0.016737  |
| 0.110471  | 1        | 939  | 26 | 0.0167811 |
| 0.118075  | 1        | 1006 | 27 | 0.0167988 |
| 0.108805  | 1        | 928  | 26 | 0.0168606 |
| 0.0928235 | 0.994956 | 793  | 22 | 0.0168694 |
| 0.118941  | 1        | 1011 | 27 | 0.0168782 |
| 0.142588  | 1        | 1212 | 34 | 0.0169577 |
| 0.124235  | 1        | 1056 | 30 | 0.0171431 |
| 0.0742592 | 1        | 639  | 18 | 0.0171519 |
| 0.0750793 | 1        | 639  | 18 | 0.0171519 |
| 0.120238  | 1        | 2042 | 57 | 0.0171695 |
| 0.164824  | 1        | 1401 | 39 | 0.0171695 |
| 0.0394525 | 1        | 1127 | 31 | 0.0171695 |
| 0.117193  | 1        | 1002 | 28 | 0.0171784 |
| 0.0908236 | 1        | 773  | 22 | 0.0172049 |
| 0.110381  | 1        | 941  | 22 | 0.0172666 |
| 0.105047  | 1        | 895  | 22 | 0.0172666 |
| 0.0701549 | 1        | 598  | 17 | 0.0172755 |
| 0.120824  | 1        | 1027 | 29 | 0.0172843 |
| 0.124941  | 1        | 1062 | 30 | 0.0172843 |
| 0.069004  | 1        | 742  | 21 | 0.0173284 |
| 0.110353  | 1        | 938  | 26 | 0.0173284 |
| 0.0771765 | 1        | 656  | 19 | 0.0173637 |
| 0.0485542 | 1        | 1387 | 34 | 0.0173902 |
| 0.0708251 | 1        | 612  | 18 | 0.0173991 |
| 0.126538  | 1        | 1080 | 30 | 0.0174432 |
| 0.0910588 | 1        | 774  | 22 | 0.017505  |
| 0.0905882 | 1        | 770  | 22 | 0.0177522 |
| 0.130087  | 1        | 1106 | 30 | 0.0177786 |
| 0.0904706 | 1        | 769  | 16 | 0.0177875 |
| 0.0807059 | 1        | 686  | 12 | 0.0178846 |
| 0.0824706 | 1        | 701  | 19 | 0.0183171 |
| 0.118674  | 1        | 1013 | 24 | 0.0184407 |

|           |          |      |    |           |
|-----------|----------|------|----|-----------|
| 0.126     | 1        | 1071 | 30 | 0.0186084 |
| 0.0836653 | 1        | 714  | 20 | 0.0189086 |
| 0.166353  | 0.768061 | 1841 | 52 | 0.0190057 |
| 0.070454  | 1        | 599  | 10 | 0.0190057 |
| 0.0437527 | 1        | 1719 | 48 | 0.0190675 |
| 0.0734118 | 1        | 624  | 11 | 0.0191469 |
| 0.121294  | 1        | 1031 | 29 | 0.0191469 |
| 0.0769412 | 1        | 654  | 11 | 0.0192175 |
| 0.0766612 | 1        | 653  | 12 | 0.0193323 |
| 0.117294  | 1        | 997  | 25 | 0.0193676 |
| 0.0573032 | 1        | 929  | 26 | 0.0194735 |
| 0.101172  | 1        | 967  | 26 | 0.0195618 |
| 0.0842598 | 1        | 720  | 14 | 0.0198355 |
| 0.0864299 | 1        | 735  | 20 | 0.0199502 |
| 0.095082  | 1        | 812  | 23 | 0.0199944 |
| 0.115847  | 1        | 1011 | 28 | 0.0200914 |
| 0.0733643 | 1        | 1026 | 29 | 0.0202768 |
| 0.129765  | 1        | 1103 | 28 | 0.0204269 |
| 0.113412  | 1        | 964  | 27 | 0.0204357 |
| 0.161059  | 1        | 1369 | 38 | 0.0204975 |
| 0.115176  | 1        | 979  | 25 | 0.0206299 |
| 0.0457113 | 1        | 696  | 17 | 0.0206388 |
| 0.119647  | 1        | 1017 | 26 | 0.0206829 |
| 0.119605  | 1        | 1017 | 26 | 0.0206829 |
| 0.0514468 | 1        | 1113 | 27 | 0.0207535 |
| 0.0841723 | 1        | 719  | 20 | 0.0207535 |
| 0.101647  | 1        | 864  | 24 | 0.0208859 |
| 0.111921  | 1        | 952  | 25 | 0.0210713 |
| 0.113765  | 1        | 967  | 27 | 0.0210713 |
| 0.100941  | 1        | 858  | 24 | 0.021089  |
| 0.0789413 | 1        | 689  | 19 | 0.0212479 |
| 0.0807059 | 1        | 686  | 45 | 0.0212743 |
| 0.0559549 | 1        | 903  | 25 | 0.0212832 |
| 0.0881324 | 1        | 756  | 19 | 0.0213096 |
| 0.0551223 | 1        | 728  | 19 | 0.0213096 |
| 0.112095  | 1        | 1000 | 23 | 0.0213803 |
| 0.0892941 | 1        | 759  | 21 | 0.0214156 |
| 0.103861  | 1        | 885  | 24 | 0.0214421 |
| 0.0841176 | 1        | 715  | 19 | 0.0215127 |
| 0.114118  | 1        | 970  | 24 | 0.021601  |
| 0.109294  | 1        | 929  | 21 | 0.0216363 |
| 0.151176  | 1        | 1285 | 36 | 0.0216716 |
| 0.187882  | 1        | 1597 | 44 | 0.0217952 |
| 0.0917613 | 1        | 832  | 20 | 0.0218834 |
| 0.0836471 | 1        | 711  | 20 | 0.0218923 |
| 0.0786042 | 1        | 669  | 17 | 0.0218923 |
| 0.0742353 | 1        | 631  | 16 | 0.0219629 |

|            |          |      |    |           |
|------------|----------|------|----|-----------|
| 0.0833425  | 1        | 761  | 21 | 0.022007  |
| 0.11577    | 1        | 994  | 25 | 0.022007  |
| 0.101308   | 1        | 875  | 24 | 0.0220158 |
| 0.0908235  | 1        | 772  | 22 | 0.0220247 |
| 0.116322   | 1        | 997  | 27 | 0.0220423 |
| 0.106705   | 1        | 1001 | 28 | 0.0220512 |
| 0.117695   | 1        | 1001 | 28 | 0.0220512 |
| 0.0685748  | 1        | 587  | 17 | 0.0220512 |
| 0.0839087  | 1        | 717  | 20 | 0.0221041 |
| 0.078805   | 1        | 670  | 20 | 0.0221659 |
| 0.0936471  | 1        | 796  | 21 | 0.0221747 |
| 0.0788235  | 1        | 670  | 19 | 0.0222189 |
| 0.0254118  | 0.202817 | 1065 | 30 | 0.0222277 |
| 0.180588   | 1        | 1535 | 43 | 0.0222454 |
| 0.0735294  | 1        | 625  | 13 | 0.0222454 |
| 0.101529   | 1        | 863  | 22 | 0.0223425 |
| 0.0757014  | 1        | 653  | 16 | 0.0223866 |
| 0.201828   | 1        | 1722 | 48 | 0.0224131 |
| 0.0955154  | 1        | 820  | 20 | 0.0224661 |
| 0.0708235  | 1        | 602  | 17 | 0.0225102 |
| 0.0769412  | 1        | 654  | 16 | 0.022572  |
| 0.0990029  | 1        | 844  | 23 | 0.0225985 |
| 0.120118   | 1        | 1021 | 29 | 0.0227397 |
| 0.111529   | 1        | 948  | 27 | 0.0227574 |
| 0.0923529  | 1        | 785  | 17 | 0.022775  |
| 0.0921686  | 1        | 785  | 17 | 0.022775  |
| 0.104588   | 1        | 889  | 25 | 0.0227838 |
| 0.133412   | 1        | 1134 | 31 | 0.0228368 |
| 0.118706   | 1        | 1009 | 28 | 0.0229781 |
| 0.11334    | 1        | 972  | 21 | 0.0229781 |
| 0.0500601  | 1        | 1083 | 23 | 0.023031  |
| 0.126941   | 1        | 1079 | 24 | 0.023031  |
| 0.0744647  | 1        | 925  | 26 | 0.023031  |
| 0.0871765  | 1        | 741  | 21 | 0.023031  |
| 0.0825882  | 1        | 702  | 14 | 0.0230487 |
| 0.0980255  | 1        | 839  | 23 | 0.0230487 |
| 0.0770588  | 1        | 655  | 18 | 0.0230752 |
| 0.0351904  | 1        | 998  | 28 | 0.0231016 |
| 0.0817647  | 1        | 695  | 17 | 0.0231193 |
| 0.104588   | 0.802347 | 1108 | 27 | 0.0231193 |
| 0.00740426 | 0.110108 | 1108 | 27 | 0.0231193 |
| 0.107676   | 1        | 923  | 26 | 0.0231193 |
| 0.0577297  | 1        | 860  | 22 | 0.0231458 |
| 0.0906526  | 1        | 771  | 22 | 0.0232429 |
| 0.0389016  | 1        | 969  | 24 | 0.0232429 |
| 0.0656471  | 1        | 558  | 16 | 0.0232694 |
| 0.139176   | 1        | 1183 | 29 | 0.0232782 |

|           |          |      |    |           |
|-----------|----------|------|----|-----------|
| 0.0947712 | 1        | 1044 | 29 | 0.0233665 |
| 0.0988278 | 1        | 978  | 27 | 0.0233929 |
| 0.122106  | 1        | 1039 | 29 | 0.0234459 |
| 0.0710825 | 1        | 939  | 21 | 0.0234547 |
| 0.0591393 | 1        | 683  | 17 | 0.0234812 |
| 0.132235  | 1        | 1124 | 20 | 0.0234812 |
| 0.0531254 | 0.503893 | 899  | 25 | 0.0234989 |
| 0.124118  | 1        | 1056 | 27 | 0.0235077 |
| 0.106941  | 1        | 909  | 25 | 0.0235077 |
| 0.0740062 | 1        | 646  | 18 | 0.0235077 |
| 0.0844017 | 1        | 1185 | 27 | 0.0235165 |
| 0.0865882 | 1        | 736  | 21 | 0.0235254 |
| 0.120235  | 1        | 1022 | 22 | 0.0235254 |
| 0.111892  | 1        | 955  | 26 | 0.0236931 |
| 0.0683122 | 1        | 631  | 17 | 0.0236931 |
| 0.105707  | 1        | 902  | 19 | 0.0237284 |
| 0.112222  | 1        | 954  | 22 | 0.0237284 |
| 0.0533527 | 1        | 736  | 19 | 0.0237284 |
| 0.134742  | 1        | 1148 | 22 | 0.0237461 |
| 0.12326   | 1        | 1054 | 29 | 0.0237637 |
| 0.069552  | 1        | 593  | 17 | 0.0238255 |
| 0.0590528 | 1        | 818  | 23 | 0.0238343 |
| 0.082     | 1        | 697  | 20 | 0.0238608 |
| 0.131205  | 1        | 1118 | 28 | 0.0238785 |
| 0.0755854 | 1        | 652  | 18 | 0.0238785 |
| 0.0834118 | 1        | 709  | 13 | 0.0239049 |
| 0.0903529 | 1        | 768  | 22 | 0.0239226 |
| 0.0167268 | 1        | 566  | 16 | 0.0239314 |
| 0.0828209 | 1        | 1751 | 49 | 0.0239667 |
| 0.224118  | 1        | 1905 | 48 | 0.0239756 |
| 0.0874118 | 1        | 743  | 16 | 0.0239756 |
| 0.0731765 | 1        | 622  | 17 | 0.0239756 |
| 0.073588  | 1        | 628  | 12 | 0.0239756 |
| 0.0984706 | 1        | 837  | 13 | 0.0240109 |
| 0.104941  | 1        | 892  | 21 | 0.0240374 |
| 0.0996021 | 1        | 851  | 23 | 0.0240374 |
| 0.105257  | 1        | 915  | 23 | 0.0240462 |
| 0.113059  | 1        | 961  | 26 | 0.0244258 |
| 0.0789801 | 1        | 889  | 25 | 0.0245582 |
| 0.0809412 | 1        | 688  | 19 | 0.0246818 |
| 0.0386343 | 1        | 946  | 25 | 0.0246818 |
| 0.0906539 | 1        | 775  | 22 | 0.0247171 |
| 0.101715  | 1        | 872  | 25 | 0.0247347 |
| 0.0478058 | 1        | 975  | 26 | 0.024823  |
| 0.133765  | 0.991282 | 1147 | 27 | 0.0248407 |
| 0.127176  | 1        | 1081 | 30 | 0.024876  |
| 0.118824  | 1        | 1010 | 23 | 0.0249201 |



|           |          |      |    |           |
|-----------|----------|------|----|-----------|
| 0.0533003 | 1        | 1183 | 29 | 0.0249378 |
| 0.0964706 | 1        | 820  | 23 | 0.0249554 |
| 0.0849412 | 1        | 722  | 20 | 0.0251143 |
| 0.0585464 | 1        | 609  | 15 | 0.0251143 |
| 0.12342   | 1        | 1064 | 30 | 0.0252291 |
| 0.0502558 | 1        | 894  | 23 | 0.0254498 |
| 0.136706  | 1        | 1162 | 33 | 0.0255027 |
| 0.179294  | 1        | 1524 | 36 | 0.0255292 |
| 0.08      | 1        | 680  | 18 | 0.0255557 |
| 0.0810588 | 1        | 689  | 19 | 0.0256175 |
| 0.0493961 | 1        | 818  | 17 | 0.0256351 |
| 0.0726187 | 1        | 693  | 14 | 0.0258735 |
| 0.0902353 | 1        | 767  | 22 | 0.0259353 |
| 0.0863529 | 1        | 734  | 20 | 0.0259706 |
| 0.0835294 | 1        | 710  | 20 | 0.0260854 |
| 0.0921733 | 1        | 802  | 23 | 0.0260854 |
| 0.127294  | 1        | 1082 | 30 | 0.0261648 |
| 0.0472092 | 1        | 905  | 25 | 0.0262089 |
| 0.0774634 | 1        | 783  | 22 | 0.0262884 |
| 0.0710588 | 1        | 604  | 16 | 0.0263325 |
| 0.100092  | 1        | 867  | 23 | 0.0263325 |
| 0.088     | 1        | 748  | 21 | 0.0263413 |
| 0.105529  | 1        | 897  | 24 | 0.026359  |
| 0.0994118 | 1        | 845  | 24 | 0.026359  |
| 0.106383  | 1        | 910  | 24 | 0.0263855 |
| 0.0812846 | 1        | 691  | 19 | 0.0263855 |
| 0.0634156 | 1        | 632  | 11 | 0.0264031 |
| 0.0825882 | 1        | 702  | 15 | 0.0265444 |
| 0.0792926 | 1        | 677  | 14 | 0.0265709 |
| 0.0859259 | 1        | 754  | 21 | 0.0265709 |
| 0.0969412 | 1        | 824  | 23 | 0.0265885 |
| 0.0870459 | 0.924757 | 824  | 23 | 0.0265885 |
| 0.0216855 | 1        | 852  | 24 | 0.0265973 |
| 0.0428406 | 1        | 666  | 19 | 0.0266326 |
| 0.0788235 | 1        | 670  | 19 | 0.0267209 |
| 0.115176  | 1        | 979  | 17 | 0.0267209 |
| 0.088     | 1        | 748  | 21 | 0.0268269 |
| 0.0694379 | 1        | 593  | 16 | 0.0268357 |
| 0.0451632 | 1        | 747  | 21 | 0.0270828 |
| 0.0530631 | 1        | 453  | 13 | 0.02718   |
| 0.103279  | 1        | 882  | 20 | 0.0272947 |
| 0.0531393 | 1        | 617  | 11 | 0.027436  |
| 0.11301   | 1        | 972  | 26 | 0.0274448 |
| 0.0775294 | 1        | 659  | 15 | 0.0274448 |
| 0.125412  | 1        | 1066 | 24 | 0.0275066 |
| 0.0806943 | 1        | 688  | 19 | 0.0276037 |
| 0.0805243 | 1        | 688  | 19 | 0.0276037 |

|           |          |      |    |           |
|-----------|----------|------|----|-----------|
| 0.0986292 | 1        | 885  | 25 | 0.0276478 |
| 0.0925882 | 1        | 787  | 20 | 0.0276566 |
| 0.068     | 1        | 578  | 11 | 0.0277449 |
| 0.0752941 | 1        | 640  | 18 | 0.0277449 |
| 0.10329   | 1        | 879  | 24 | 0.0277449 |
| 0.102783  | 1        | 879  | 24 | 0.0277449 |
| 0.0889412 | 1        | 756  | 19 | 0.0277714 |
| 0.123176  | 1        | 1047 | 29 | 0.0277802 |
| 0.0500717 | 1        | 663  | 19 | 0.0278244 |
| 0.104353  | 1        | 887  | 25 | 0.027842  |
| 0.116315  | 1        | 991  | 22 | 0.0278773 |
| 0.0852039 | 1        | 725  | 14 | 0.0279391 |
| 0.0826767 | 1        | 703  | 18 | 0.0280539 |
| 0.0956471 | 1        | 813  | 23 | 0.0280627 |
| 0.0997767 | 1        | 849  | 24 | 0.0280892 |
| 0.054648  | 0.731132 | 636  | 15 | 0.0280892 |
| 0.100471  | 1        | 854  | 21 | 0.0281157 |
| 0.0715289 | 1        | 611  | 10 | 0.0281422 |
| 0.0905669 | 0.927711 | 830  | 19 | 0.0282393 |
| 0.0136539 | 0.140964 | 830  | 19 | 0.0282393 |
| 0.0916471 | 1        | 779  | 22 | 0.0282481 |
| 0.0892941 | 1        | 759  | 14 | 0.0282746 |
| 0.0555597 | 1        | 746  | 21 | 0.0282746 |
| 0.103529  | 1        | 880  | 25 | 0.0282922 |
| 0.114706  | 1        | 975  | 26 | 0.0283187 |
| 0.108235  | 1        | 920  | 26 | 0.0283187 |
| 0.0702894 | 1        | 833  | 23 | 0.0283187 |
| 0.0495219 | 1        | 1010 | 29 | 0.0283275 |
| 0.0409412 | 0.467114 | 745  | 21 | 0.0283364 |
| 0.0876471 | 1        | 745  | 21 | 0.0283364 |
| 0.0759464 | 1        | 652  | 11 | 0.0283893 |
| 0.0896471 | 1        | 762  | 19 | 0.0283893 |
| 0.0928235 | 1        | 789  | 21 | 0.0284158 |
| 0.0718824 | 1        | 611  | 16 | 0.0284246 |
| 0.0875381 | 1        | 746  | 20 | 0.0284246 |
| 0.0790678 | 1        | 1469 | 41 | 0.0284511 |
| 0.104118  | 1        | 885  | 24 | 0.0284511 |
| 0.0648544 | 1        | 971  | 54 | 0.0285747 |
| 0.0650333 | 1        | 937  | 25 | 0.0285835 |
| 0.0982353 | 1        | 835  | 21 | 0.0285924 |
| 0.119324  | 1        | 1017 | 18 | 0.0286277 |
| 0.0836471 | 1        | 711  | 20 | 0.028663  |
| 0.0453985 | 1        | 736  | 21 | 0.0287071 |
| 0.0667515 | 1        | 577  | 16 | 0.0287954 |
| 0.074126  | 1        | 634  | 13 | 0.0288484 |
| 0.0782057 | 1        | 666  | 13 | 0.028866  |
| 0.122497  | 1        | 1046 | 26 | 0.0288925 |

|           |          |      |    |           |
|-----------|----------|------|----|-----------|
| 0.0796471 | 1        | 677  | 18 | 0.0289631 |
| 0.0994777 | 1        | 857  | 23 | 0.0289631 |
| 0.055848  | 1        | 679  | 19 | 0.0289896 |
| 0.111882  | 1        | 951  | 26 | 0.0289896 |
| 0.0909182 | 1        | 904  | 23 | 0.0290161 |
| 0.0873501 | 1        | 743  | 21 | 0.0290249 |
| 0.0769412 | 1        | 654  | 14 | 0.0290779 |
| 0.0809317 | 1        | 688  | 19 | 0.029122  |
| 0.10431   | 1        | 956  | 26 | 0.0291485 |
| 0.124891  | 1        | 1151 | 30 | 0.0292103 |
| 0.0834118 | 1        | 709  | 20 | 0.0292897 |
| 0.0892941 | 1        | 759  | 17 | 0.0292986 |
| 0.124286  | 1        | 1088 | 27 | 0.0293868 |
| 0.0777895 | 1        | 663  | 18 | 0.0294045 |
| 0.126647  | 1        | 1307 | 37 | 0.0294751 |
| 0.0871765 | 1        | 741  | 20 | 0.0294839 |
| 0.105647  | 1        | 898  | 25 | 0.0295193 |
| 0.0837647 | 1        | 712  | 20 | 0.0295281 |
| 0.0801177 | 1        | 681  | 14 | 0.0295634 |
| 0.0982279 | 1        | 837  | 23 | 0.0296252 |
| 0.113059  | 1        | 961  | 26 | 0.0296517 |
| 0.105725  | 1        | 916  | 24 | 0.0296781 |
| 0.109212  | 1        | 933  | 20 | 0.0297135 |
| 0.0767261 | 1        | 689  | 16 | 0.0297135 |
| 0.0897647 | 1        | 763  | 21 | 0.0297488 |
| 0.0853729 | 1        | 736  | 20 | 0.0297929 |
| 0.0465357 | 1        | 765  | 22 | 0.029943  |
| 0.118118  | 1        | 1004 | 28 | 0.0299606 |
| 0.0405882 | 0.340573 | 1013 | 23 | 0.0299783 |
| 0.0811765 | 1        | 690  | 19 | 0.0300048 |
| 0.0480472 | 1        | 700  | 20 | 0.0300313 |
| 0.0768693 | 1        | 660  | 14 | 0.0300313 |
| 0.0809317 | 1        | 688  | 15 | 0.0300313 |
| 0.0851765 | 1        | 724  | 14 | 0.0300313 |
| 0.025668  | 1        | 440  | 13 | 0.0300577 |
| 0.0203874 | 1        | 801  | 22 | 0.0300577 |
| 0.0922353 | 1        | 784  | 21 | 0.030093  |
| 0.101431  | 1        | 957  | 27 | 0.0301372 |
| 0.0684706 | 1        | 582  | 17 | 0.030146  |
| 0.0911765 | 1        | 775  | 22 | 0.0301901 |
| 0.101529  | 1        | 863  | 24 | 0.0302166 |
| 0.119249  | 1        | 1016 | 21 | 0.0302166 |
| 0.120702  | 1        | 1032 | 24 | 0.0302255 |
| 0.107227  | 1        | 914  | 26 | 0.0302255 |
| 0.0772941 | 1        | 657  | 14 | 0.0302255 |
| 0.105523  | 1        | 919  | 24 | 0.0302255 |
| 0.0921022 | 1        | 793  | 15 | 0.0302784 |

|           |          |      |    |           |
|-----------|----------|------|----|-----------|
| 0.0923486 | 1        | 799  | 23 | 0.0302784 |
| 0.120941  | 1        | 1028 | 29 | 0.0302961 |
| 0.0957263 | 1        | 831  | 21 | 0.0303755 |
| 0.0724389 | 0.997218 | 719  | 17 | 0.0303755 |
| 0.0654339 | 1        | 644  | 31 | 0.0304108 |
| 0.0593557 | 1        | 807  | 23 | 0.030455  |
| 0.0360569 | 1        | 1030 | 24 | 0.0304638 |
| 0.0520321 | 1        | 740  | 20 | 0.0304726 |
| 0.0649807 | 1        | 740  | 20 | 0.0304726 |
| 0.112881  | 1        | 978  | 21 | 0.0305079 |
| 0.0828632 | 1        | 705  | 20 | 0.0305168 |
| 0.068372  | 1        | 719  | 20 | 0.0305168 |
| 0.0796471 | 1        | 677  | 14 | 0.0305256 |
| 0.0921176 | 1        | 783  | 22 | 0.030605  |
| 0.103176  | 1        | 877  | 25 | 0.030658  |
| 0.131412  | 1        | 1117 | 31 | 0.0306668 |
| 0.0243834 | 1        | 958  | 27 | 0.0306757 |
| 0.0751765 | 1        | 639  | 12 | 0.0306933 |
| 0.125029  | 1        | 1063 | 24 | 0.0307198 |
| 0.0963529 | 1        | 819  | 23 | 0.0307816 |
| 0.0967059 | 1        | 822  | 16 | 0.0308169 |
| 0.124353  | 1        | 1057 | 29 | 0.0308169 |
| 0.077462  | 1        | 774  | 21 | 0.0308169 |
| 0.120235  | 1        | 1022 | 23 | 0.0308346 |
| 0.0938709 | 1        | 801  | 15 | 0.0308346 |
| 0.0986773 | 1        | 843  | 21 | 0.0308346 |
| 0.0808235 | 1        | 687  | 19 | 0.0308434 |
| 0.092     | 1        | 782  | 16 | 0.030861  |
| 0.0705882 | 1        | 600  | 17 | 0.0308699 |
| 0.0728235 | 1        | 619  | 16 | 0.0308964 |
| 0.0893231 | 1        | 768  | 22 | 0.0309052 |
| 0.0670588 | 1        | 570  | 16 | 0.030914  |
| 0.0976471 | 1        | 830  | 16 | 0.0309581 |
| 0.0548956 | 1        | 781  | 22 | 0.030967  |
| 0.123882  | 1        | 1053 | 23 | 0.0310199 |
| 0.0798824 | 1        | 679  | 16 | 0.0310376 |
| 0.0550651 | 1        | 736  | 20 | 0.0310552 |
| 0.0953704 | 1        | 927  | 26 | 0.0310552 |
| 0.07626   | 1        | 752  | 21 | 0.0310906 |
| 0.107647  | 1        | 915  | 26 | 0.0311612 |
| 0.107746  | 1        | 932  | 26 | 0.03117   |
| 0.0985591 | 1        | 855  | 20 | 0.031223  |
| 0.134383  | 1        | 1144 | 33 | 0.031223  |
| 0.101023  | 1        | 859  | 24 | 0.0312406 |
| 0.0875733 | 1        | 747  | 21 | 0.0313907 |
| 0.0195526 | 1        | 423  | 11 | 0.0314525 |
| 0.109647  | 1        | 932  | 26 | 0.0314613 |

|           |   |      |    |           |
|-----------|---|------|----|-----------|
| 0.0791765 | 1 | 673  | 19 | 0.031479  |
| 0.0364189 | 1 | 587  | 17 | 0.031479  |
| 0.0724706 | 1 | 616  | 14 | 0.031479  |
| 0.0398411 | 1 | 672  | 19 | 0.0315231 |
| 0.0915294 | 1 | 778  | 22 | 0.0316114 |
| 0.0688571 | 1 | 876  | 20 | 0.0316114 |
| 0.105028  | 1 | 894  | 20 | 0.031629  |
| 0.139294  | 1 | 1184 | 32 | 0.0316379 |
| 0.136874  | 1 | 2157 | 56 | 0.0316379 |
| 0.108941  | 1 | 926  | 22 | 0.0316379 |
| 0.110706  | 1 | 941  | 21 | 0.0316379 |
| 0.0622043 | 1 | 802  | 16 | 0.0316467 |
| 0.052351  | 1 | 825  | 23 | 0.0316555 |
| 0.0732421 | 1 | 626  | 17 | 0.0316555 |
| 0.0811981 | 1 | 694  | 19 | 0.0317791 |
| 0.0673765 | 1 | 734  | 20 | 0.0317879 |
| 0.0934118 | 1 | 794  | 15 | 0.0317967 |
| 0.0704623 | 1 | 599  | 17 | 0.0317967 |
| 0.100471  | 1 | 854  | 22 | 0.0318144 |
| 0.0807076 | 1 | 1168 | 33 | 0.0318144 |
| 0.0835775 | 1 | 713  | 20 | 0.0318144 |
| 0.0687609 | 1 | 591  | 16 | 0.0318232 |
| 0.103059  | 1 | 876  | 24 | 0.0318497 |
| 0.031751  | 1 | 907  | 25 | 0.0318497 |
| 0.0812941 | 1 | 691  | 19 | 0.0318497 |
| 0.133765  | 1 | 1137 | 29 | 0.0319027 |
| 0.167882  | 1 | 1427 | 40 | 0.0320263 |
| 0.0852941 | 1 | 725  | 20 | 0.0320616 |
| 0.122353  | 1 | 1040 | 29 | 0.0321057 |
| 0.082     | 1 | 697  | 20 | 0.0321146 |
| 0.0521746 | 1 | 697  | 20 | 0.0321499 |
| 0.0794024 | 1 | 675  | 19 | 0.0321499 |
| 0.0778669 | 1 | 806  | 18 | 0.0321587 |
| 0.0707663 | 1 | 603  | 14 | 0.0322117 |
| 0.0743947 | 1 | 636  | 14 | 0.0322293 |
| 0.0872941 | 1 | 742  | 21 | 0.0322293 |
| 0.100035  | 1 | 853  | 23 | 0.0322381 |
| 0.0981061 | 1 | 834  | 17 | 0.0322381 |
| 0.0718394 | 1 | 612  | 17 | 0.032247  |
| 0.0929412 | 1 | 790  | 18 | 0.0322558 |
| 0.0900258 | 1 | 769  | 22 | 0.0322999 |
| 0.0386615 | 1 | 647  | 16 | 0.0322999 |
| 0.0827877 | 1 | 746  | 21 | 0.0323176 |
| 0.0899415 | 1 | 769  | 17 | 0.0323352 |
| 0.127059  | 1 | 1080 | 27 | 0.0323441 |
| 0.0721638 | 1 | 624  | 18 | 0.0324588 |
| 0.0486395 | 1 | 547  | 16 | 0.0324676 |

|           |   |      |    |           |
|-----------|---|------|----|-----------|
| 0.07      | 1 | 595  | 12 | 0.0324853 |
| 0.0401928 | 1 | 667  | 19 | 0.032503  |
| 0.0887059 | 1 | 754  | 20 | 0.032503  |
| 0.122     | 1 | 1037 | 23 | 0.032503  |
| 0.0764706 | 1 | 650  | 18 | 0.0325206 |
| 0.0971063 | 1 | 849  | 23 | 0.0325206 |
| 0.0901176 | 1 | 766  | 21 | 0.0325206 |
| 0.0400694 | 1 | 670  | 19 | 0.0325648 |
| 0.128588  | 1 | 1093 | 28 | 0.0325912 |
| 0.0983106 | 1 | 838  | 23 | 0.032653  |
| 0.0890379 | 1 | 770  | 22 | 0.032653  |
| 0.0656471 | 1 | 558  | 11 | 0.0327325 |
| 0.0737695 | 1 | 628  | 18 | 0.032759  |
| 0.122706  | 1 | 1043 | 28 | 0.0327678 |
| 0.0839112 | 1 | 714  | 20 | 0.0327854 |
| 0.075169  | 1 | 656  | 15 | 0.0327943 |
| 0.0834311 | 1 | 711  | 20 | 0.0327943 |
| 0.101388  | 1 | 862  | 24 | 0.0328208 |
| 0.0896471 | 1 | 762  | 22 | 0.0328208 |
| 0.0504556 | 1 | 659  | 18 | 0.0328472 |
| 0.0876471 | 1 | 745  | 21 | 0.0329178 |
| 0.103412  | 1 | 879  | 18 | 0.0329355 |
| 0.098688  | 1 | 850  | 20 | 0.032962  |
| 0.0982318 | 1 | 850  | 20 | 0.032962  |
| 0.107765  | 1 | 916  | 23 | 0.032962  |
| 0.0766799 | 1 | 655  | 17 | 0.032962  |
| 0.042702  | 1 | 519  | 15 | 0.0329973 |
| 0.0573505 | 1 | 655  | 18 | 0.0330149 |
| 0.100824  | 1 | 857  | 24 | 0.0330679 |
| 0.0829412 | 1 | 705  | 20 | 0.0330944 |
| 0.0715294 | 1 | 608  | 17 | 0.0331032 |
| 0.0711101 | 1 | 606  | 17 | 0.0331032 |
| 0.101294  | 1 | 861  | 24 | 0.0331209 |
| 0.0819904 | 1 | 697  | 16 | 0.0331474 |
| 0.0610588 | 1 | 519  | 14 | 0.0331562 |
| 0.101824  | 1 | 871  | 24 | 0.0331739 |
| 0.0688235 | 1 | 585  | 17 | 0.0331827 |
| 0.0652259 | 1 | 1002 | 23 | 0.0331915 |
| 0.117882  | 1 | 1002 | 23 | 0.0331915 |
| 0.0927063 | 1 | 1027 | 23 | 0.0332268 |
| 0.0892483 | 1 | 767  | 16 | 0.0332356 |
| 0.0765882 | 1 | 651  | 14 | 0.0332356 |
| 0.130118  | 1 | 1106 | 31 | 0.0332356 |
| 0.0757647 | 1 | 644  | 18 | 0.0332356 |
| 0.0862353 | 1 | 733  | 21 | 0.033271  |
| 0.0310955 | 1 | 654  | 18 | 0.0332974 |
| 0.102941  | 1 | 875  | 25 | 0.0332974 |

|           |          |      |    |           |
|-----------|----------|------|----|-----------|
| 0.068688  | 1        | 589  | 16 | 0.0332974 |
| 0.0343262 | 1        | 688  | 18 | 0.0333151 |
| 0.0835294 | 1        | 710  | 20 | 0.0333328 |
| 0.0949412 | 1        | 807  | 20 | 0.0333328 |
| 0.0920646 | 1        | 804  | 14 | 0.0333592 |
| 0.100235  | 1        | 852  | 24 | 0.0333592 |
| 0.0909732 | 1        | 774  | 22 | 0.0333945 |
| 0.0889412 | 1        | 756  | 21 | 0.0333945 |
| 0.107294  | 1        | 912  | 25 | 0.0334034 |
| 0.102691  | 1        | 874  | 22 | 0.033421  |
| 0.0912941 | 1        | 776  | 17 | 0.0334387 |
| 0.0185039 | 1        | 727  | 19 | 0.0334387 |
| 0.0896767 | 1        | 774  | 17 | 0.0334475 |
| 0.098     | 1        | 833  | 24 | 0.0334475 |
| 0.0791765 | 1        | 673  | 19 | 0.033474  |
| 0.121504  | 1        | 1034 | 29 | 0.0334828 |
| 0.0922353 | 1        | 784  | 22 | 0.0334828 |
| 0.11561   | 1        | 988  | 27 | 0.0334916 |
| 0.104235  | 1        | 886  | 24 | 0.0334916 |
| 0.0504856 | 1        | 785  | 22 | 0.0335005 |
| 0.0843468 | 1        | 756  | 20 | 0.0335005 |
| 0.074     | 0.990551 | 635  | 13 | 0.0335093 |
| 0.0849888 | 1        | 723  | 20 | 0.0335181 |
| 0.0365861 | 1        | 604  | 16 | 0.0335446 |
| 0.0874195 | 1        | 747  | 15 | 0.0335711 |
| 0.104353  | 1        | 887  | 23 | 0.0335799 |
| 0.0634398 | 1        | 540  | 15 | 0.0335976 |
| 0.0998837 | 1        | 859  | 24 | 0.0336064 |
| 0.0775294 | 1        | 659  | 16 | 0.0336064 |
| 0.105059  | 1        | 893  | 20 | 0.0336064 |
| 0.0700234 | 1        | 598  | 17 | 0.0336329 |
| 0.0821176 | 1        | 698  | 15 | 0.0336417 |
| 0.0832762 | 1        | 729  | 21 | 0.0336594 |
| 0.0688359 | 1        | 861  | 20 | 0.0336594 |
| 0.0816471 | 1        | 694  | 19 | 0.0336594 |
| 0.0618824 | 1        | 526  | 14 | 0.0336682 |
| 0.0873967 | 1        | 751  | 21 | 0.0336682 |
| 0.139995  | 1        | 1195 | 34 | 0.033677  |
| 0.0800278 | 1        | 690  | 16 | 0.0336858 |
| 0.0217211 | 1        | 735  | 21 | 0.03373   |
| 0.0763529 | 1        | 649  | 16 | 0.0337388 |
| 0.143647  | 1        | 1221 | 43 | 0.0337388 |
| 0.0200184 | 1        | 654  | 17 | 0.0337476 |
| 0.0278847 | 1        | 500  | 14 | 0.0337565 |
| 0.0921176 | 1        | 783  | 22 | 0.0337653 |
| 0.0376441 | 1        | 1479 | 41 | 0.0337918 |
| 0.0749412 | 1        | 637  | 11 | 0.0338271 |

|           |   |      |    |           |
|-----------|---|------|----|-----------|
| 0.0718519 | 1 | 885  | 25 | 0.0338536 |
| 0.0743529 | 1 | 632  | 18 | 0.0338536 |
| 0.0777889 | 1 | 698  | 19 | 0.0338624 |
| 0.0764623 | 1 | 651  | 16 | 0.0338801 |
| 0.0703717 | 1 | 604  | 17 | 0.0339418 |
| 0.062478  | 1 | 532  | 15 | 0.0339418 |
| 0.0753237 | 1 | 1018 | 24 | 0.0340389 |
| 0.0988733 | 1 | 1018 | 24 | 0.0340389 |
| 0.0810934 | 1 | 1071 | 30 | 0.0340566 |
| 0.0747059 | 1 | 635  | 18 | 0.0340566 |
| 0.114353  | 1 | 972  | 27 | 0.0340743 |
| 0.0875029 | 1 | 745  | 16 | 0.0340743 |
| 0.126118  | 1 | 1072 | 28 | 0.0340919 |
| 0.0843529 | 1 | 717  | 14 | 0.0341007 |
| 0.0400982 | 1 | 719  | 20 | 0.0341096 |
| 0.0756471 | 1 | 643  | 19 | 0.0341184 |
| 0.0400526 | 1 | 579  | 13 | 0.0341184 |
| 0.0905882 | 1 | 770  | 39 | 0.0341184 |
| 0.0887059 | 1 | 754  | 21 | 0.0341184 |
| 0.120258  | 1 | 1024 | 28 | 0.0341272 |
| 0.0908136 | 1 | 778  | 16 | 0.0341272 |
| 0.0784792 | 1 | 675  | 19 | 0.0341272 |
| 0.0707233 | 1 | 616  | 15 | 0.0341449 |
| 0.149086  | 1 | 1272 | 30 | 0.0341802 |
| 0.088     | 1 | 748  | 21 | 0.0341802 |
| 0.0166085 | 1 | 562  | 16 | 0.034189  |
| 0.0945019 | 1 | 813  | 22 | 0.034189  |
| 0.0933302 | 1 | 799  | 19 | 0.034189  |
| 0.0661693 | 1 | 816  | 23 | 0.0341978 |
| 0.0612941 | 1 | 521  | 14 | 0.0342067 |
| 0.126471  | 1 | 1075 | 23 | 0.0342243 |
| 0.101882  | 1 | 866  | 25 | 0.0342596 |
| 0.0807059 | 1 | 686  | 17 | 0.0342861 |
| 0.0764638 | 1 | 666  | 19 | 0.0343038 |
| 0.0722022 | 1 | 620  | 18 | 0.0343214 |
| 0.0689013 | 1 | 740  | 21 | 0.0343391 |
| 0.127176  | 1 | 1081 | 30 | 0.0343391 |
| 0.108485  | 1 | 1019 | 26 | 0.0343391 |
| 0.0983529 | 1 | 836  | 24 | 0.0343479 |
| 0.0958824 | 1 | 815  | 23 | 0.0343479 |
| 0.0644826 | 1 | 683  | 14 | 0.0343832 |
| 0.072     | 1 | 612  | 14 | 0.0344009 |
| 0.0789412 | 1 | 671  | 18 | 0.0344009 |
| 0.0699651 | 1 | 741  | 21 | 0.0344009 |
| 0.102249  | 1 | 1032 | 29 | 0.0344009 |
| 0.0700847 | 1 | 596  | 17 | 0.0345245 |
| 0.0779068 | 1 | 664  | 19 | 0.0347098 |



|           |   |      |    |           |
|-----------|---|------|----|-----------|
| 0.0754118 | 1 | 641  | 18 | 0.0347275 |
| 0.0787531 | 1 | 672  | 19 | 0.0348069 |
| 0.0940669 | 1 | 807  | 23 | 0.0348158 |
| 0.0627059 | 1 | 533  | 15 | 0.0350718 |
| 0.0713145 | 1 | 625  | 17 | 0.0351512 |
| 0.07      | 1 | 595  | 12 | 0.0351777 |
| 0.0699202 | 1 | 596  | 16 | 0.0352218 |
| 0.0751765 | 1 | 639  | 18 | 0.0352571 |
| 0.074495  | 1 | 649  | 17 | 0.0352836 |
| 0.0460413 | 1 | 617  | 13 | 0.0353101 |
| 0.072322  | 1 | 636  | 18 | 0.0354249 |
| 0.07      | 1 | 595  | 17 | 0.0354337 |
| 0.092     | 1 | 782  | 22 | 0.035522  |
| 0.0725882 | 1 | 617  | 15 | 0.0355308 |
| 0.0694118 | 1 | 590  | 17 | 0.0355485 |
| 0.0748235 | 1 | 636  | 17 | 0.0356103 |
| 0.0649887 | 1 | 630  | 18 | 0.0357338 |
| 0.0418771 | 1 | 622  | 17 | 0.0357868 |
| 0.0366723 | 1 | 525  | 10 | 0.0358839 |
| 0.0354538 | 1 | 598  | 15 | 0.0358839 |
| 0.0710588 | 1 | 604  | 14 | 0.0361575 |
| 0.0757113 | 1 | 644  | 18 | 0.0361575 |
| 0.0363896 | 1 | 612  | 13 | 0.0364047 |
| 0.07189   | 1 | 612  | 13 | 0.0364047 |
| 0.0927059 | 1 | 788  | 16 | 0.0364136 |
| 0.0736471 | 1 | 626  | 16 | 0.0364842 |
| 0.0481484 | 1 | 667  | 15 | 0.036546  |
| 0.0669412 | 1 | 569  | 15 | 0.0365989 |
| 0.0705882 | 1 | 600  | 16 | 0.0366166 |
| 0.0717642 | 1 | 611  | 17 | 0.0367578 |
| 0.105494  | 1 | 1108 | 30 | 0.0367755 |
| 0.0897647 | 1 | 763  | 15 | 0.0367843 |
| 0.0716435 | 1 | 619  | 17 | 0.036802  |
| 0.0377358 | 1 | 636  | 16 | 0.0368373 |
| 0.0754118 | 1 | 641  | 18 | 0.0369256 |
| 0.111294  | 1 | 946  | 19 | 0.0371021 |
| 0.0806903 | 1 | 692  | 20 | 0.0371286 |
| 0.0742402 | 1 | 662  | 19 | 0.0371727 |
| 0.0942353 | 1 | 801  | 22 | 0.0371727 |
| 0.0702353 | 1 | 597  | 16 | 0.0371815 |
| 0.137248  | 1 | 1171 | 32 | 0.037208  |
| 0.0459685 | 1 | 683  | 17 | 0.0372169 |
| 0.0277973 | 1 | 634  | 18 | 0.0372169 |
| 0.0811765 | 1 | 690  | 19 | 0.0372522 |
| 0.0388948 | 1 | 656  | 15 | 0.0373316 |
| 0.0775294 | 1 | 659  | 19 | 0.0374199 |
| 0.0754118 | 1 | 641  | 15 | 0.0374729 |

|           |          |     |    |           |
|-----------|----------|-----|----|-----------|
| 0.076     | 1        | 646 | 17 | 0.037517  |
| 0.0776471 | 1        | 660 | 16 | 0.0375788 |
| 0.0532396 | 1        | 636 | 18 | 0.0375876 |
| 0.0807059 | 1        | 686 | 17 | 0.0376141 |
| 0.110367  | 1        | 939 | 26 | 0.0376229 |
| 0.0678035 | 1        | 839 | 24 | 0.0376406 |
| 0.0795294 | 1        | 676 | 17 | 0.0376759 |
| 0.0766792 | 1        | 653 | 13 | 0.0377642 |
| 0.0749442 | 1        | 638 | 18 | 0.0377818 |
| 0.0705732 | 1        | 607 | 17 | 0.0378524 |
| 0.0731765 | 1        | 622 | 11 | 0.037976  |
| 0.0997647 | 1        | 848 | 24 | 0.0380378 |
| 0.103762  | 1        | 902 | 25 | 0.0380555 |
| 0.0717012 | 1        | 620 | 14 | 0.0380555 |
| 0.0817179 | 1        | 704 | 20 | 0.0382408 |
| 0.0917647 | 1        | 780 | 22 | 0.038285  |
| 0.0216214 | 1        | 591 | 17 | 0.0385675 |
| 0.0905882 | 1        | 770 | 20 | 0.0385763 |
| 0.104353  | 1        | 887 | 25 | 0.0386028 |
| 0.0658428 | 1        | 634 | 12 | 0.0386911 |
| 0.0484535 | 1        | 636 | 18 | 0.0387529 |
| 0.0710274 | 1        | 607 | 17 | 0.0387793 |
| 0.0885882 | 1        | 753 | 20 | 0.0388146 |
| 0.0678204 | 1        | 580 | 13 | 0.0388235 |
| 0.0409412 | 1        | 348 | 10 | 0.0388853 |
| 0.0822755 | 1        | 700 | 20 | 0.0388941 |
| 0.0804706 | 1        | 684 | 19 | 0.0389029 |
| 0.0742944 | 1        | 637 | 12 | 0.0389294 |
| 0.0520265 | 1        | 629 | 12 | 0.0389735 |
| 0.0650129 | 1        | 553 | 16 | 0.0390088 |
| 0.0683237 | 1        | 602 | 15 | 0.0390177 |
| 0.0716471 | 1        | 609 | 16 | 0.0390353 |
| 0.0737647 | 1        | 627 | 13 | 0.0391148 |
| 0.0727059 | 1        | 618 | 10 | 0.0392119 |
| 0.0701098 | 1        | 600 | 11 | 0.0392384 |
| 0.0705882 | 1        | 600 | 17 | 0.039256  |
| 0.0725029 | 1        | 617 | 15 | 0.0392913 |
| 0.0358234 | 1        | 598 | 17 | 0.0392913 |
| 0.0703529 | 1        | 598 | 17 | 0.0392913 |
| 0.0880121 | 1        | 754 | 14 | 0.0392913 |
| 0.0727145 | 0.982622 | 633 | 18 | 0.0393973 |
| 0.0714118 | 1        | 607 | 16 | 0.0395738 |
| 0.0806772 | 1        | 691 | 19 | 0.0396797 |
| 0.0716529 | 1        | 616 | 17 | 0.0397768 |
| 0.0301407 | 1        | 861 | 24 | 0.0397768 |
| 0.0713449 | 1        | 609 | 12 | 0.039971  |
| 0.0689412 | 1        | 586 | 14 | 0.0399799 |

|           |          |      |    |           |
|-----------|----------|------|----|-----------|
| 0.102824  | 1        | 874  | 25 | 0.0399887 |
| 0.0731394 | 1        | 626  | 12 | 0.0400064 |
| 0.0677584 | 1        | 662  | 17 | 0.0401917 |
| 0.0711765 | 1        | 605  | 17 | 0.0402447 |
| 0.0841176 | 1        | 715  | 20 | 0.0402623 |
| 0.0761176 | 1        | 647  | 12 | 0.0402977 |
| 0.0499856 | 1        | 694  | 20 | 0.0403065 |
| 0.114706  | 1        | 975  | 27 | 0.0403595 |
| 0.075394  | 1        | 641  | 16 | 0.0403595 |
| 0.039415  | 1        | 574  | 16 | 0.0403683 |
| 0.0827456 | 1        | 704  | 19 | 0.0403683 |
| 0.0601376 | 1        | 708  | 20 | 0.0403771 |
| 0.045848  | 1        | 392  | 11 | 0.0404477 |
| 0.085848  | 1        | 734  | 21 | 0.0404742 |
| 0.0704706 | 1        | 599  | 17 | 0.040483  |
| 0.0327059 | 0.468013 | 594  | 17 | 0.040483  |
| 0.0628235 | 1        | 534  | 24 | 0.0405184 |
| 0.0404295 | 1        | 610  | 11 | 0.0405184 |
| 0.0703529 | 1        | 598  | 15 | 0.0405448 |
| 0.0958824 | 1        | 815  | 21 | 0.0407214 |
| 0.0698439 | 1        | 595  | 17 | 0.0407214 |
| 0.07      | 1        | 595  | 17 | 0.0407214 |
| 0.0267278 | 1        | 758  | 18 | 0.0407655 |
| 0.0260931 | 1        | 518  | 14 | 0.0407832 |
| 0.0525882 | 1        | 447  | 11 | 0.040792  |
| 0.0722228 | 1        | 656  | 18 | 0.0408008 |
| 0.08      | 1        | 680  | 12 | 0.0408626 |
| 0.122941  | 1        | 1045 | 28 | 0.0408714 |
| 0.0553536 | 1        | 670  | 14 | 0.0408714 |
| 0.0384111 | 1        | 645  | 18 | 0.0409597 |
| 0.0698084 | 1        | 594  | 15 | 0.0409862 |
| 0.03179   | 1        | 574  | 11 | 0.040995  |
| 0.0719812 | 1        | 614  | 17 | 0.040995  |
| 0.110353  | 1        | 938  | 26 | 0.040995  |
| 0.0754629 | 1        | 644  | 12 | 0.0410039 |
| 0.0694118 | 1        | 590  | 17 | 0.0410215 |
| 0.0928235 | 1        | 789  | 20 | 0.0410304 |
| 0.0751765 | 1        | 639  | 18 | 0.0410304 |
| 0.0683529 | 1        | 581  | 11 | 0.041048  |
| 0.0506978 | 1        | 861  | 25 | 0.041101  |
| 0.0716302 | 1        | 609  | 17 | 0.0411098 |
| 0.0765335 | 1        | 680  | 19 | 0.0411098 |
| 0.044606  | 1        | 595  | 16 | 0.0411981 |
| 0.072     | 1        | 612  | 15 | 0.0412157 |
| 0.0390548 | 1        | 633  | 18 | 0.0412687 |
| 0.0777647 | 1        | 661  | 19 | 0.0413481 |
| 0.0682353 | 1        | 580  | 10 | 0.0414364 |

|           |         |     |    |           |
|-----------|---------|-----|----|-----------|
| 0.0857647 | 1       | 729 | 21 | 0.0414541 |
| 0.0709428 | 1       | 605 | 17 | 0.0414541 |
| 0.0604706 | 1       | 514 | 15 | 0.0415159 |
| 0.0771765 | 1       | 656 | 13 | 0.0415335 |
| 0.0767059 | 1       | 652 | 18 | 0.0415777 |
| 0.0688647 | 1       | 589 | 16 | 0.0416483 |
| 0.0975294 | 1       | 829 | 23 | 0.0416571 |
| 0.0326069 | 1       | 597 | 14 | 0.0417101 |
| 0.0998247 | 1       | 854 | 24 | 0.0417189 |
| 0.0714118 | 1       | 607 | 17 | 0.0417189 |
| 0.0697647 | 1       | 593 | 17 | 0.0418072 |
| 0.0695193 | 1       | 593 | 15 | 0.0418072 |
| 0.0799344 | 1       | 682 | 19 | 0.041816  |
| 0.0675967 | 1       | 596 | 16 | 0.0418513 |
| 0.0769412 | 1       | 654 | 18 | 0.041869  |
| 0.0767065 | 1       | 654 | 18 | 0.041869  |
| 0.0783529 | 1       | 666 | 19 | 0.041869  |
| 0.104118  | 1       | 885 | 25 | 0.0418778 |
| 0.0477647 | 1       | 406 | 10 | 0.0419131 |
| 0.0832062 | 0.99439 | 713 | 18 | 0.0419219 |
| 0.0704225 | 1       | 600 | 17 | 0.0419308 |
| 0.0729228 | 1       | 624 | 18 | 0.0419396 |
| 0.0784044 | 1       | 684 | 16 | 0.0420014 |
| 0.0275127 | 1       | 594 | 14 | 0.042019  |
| 0.110133  | 1       | 938 | 20 | 0.0420543 |
| 0.0836471 | 1       | 711 | 20 | 0.0421161 |
| 0.086     | 1       | 731 | 17 | 0.0421161 |
| 0.0779175 | 1       | 663 | 18 | 0.0421691 |
| 0.0810335 | 1       | 690 | 13 | 0.0422309 |
| 0.0811097 | 1       | 690 | 20 | 0.0422662 |
| 0.0746917 | 1       | 636 | 17 | 0.0422662 |
| 0.0744555 | 1       | 694 | 15 | 0.0423457 |
| 0.0751765 | 1       | 639 | 18 | 0.0423545 |
| 0.0904482 | 1       | 785 | 20 | 0.0423721 |
| 0.0851364 | 1       | 724 | 17 | 0.0424074 |
| 0.0588292 | 1       | 607 | 10 | 0.0425487 |
| 0.0720414 | 1       | 613 | 17 | 0.0425487 |
| 0.0729412 | 1       | 620 | 17 | 0.0425928 |
| 0.0700973 | 1       | 598 | 17 | 0.0426016 |
| 0.0777647 | 1       | 661 | 17 | 0.0426016 |
| 0.0711765 | 1       | 605 | 12 | 0.0426105 |
| 0.0486626 | 1       | 564 | 16 | 0.0426634 |
| 0.0897647 | 1       | 763 | 21 | 0.0426723 |
| 0.0787562 | 1       | 694 | 20 | 0.0426723 |
| 0.0763529 | 1       | 649 | 16 | 0.0427252 |
| 0.0615466 | 1       | 585 | 16 | 0.0428135 |
| 0.0769412 | 1       | 654 | 18 | 0.0428488 |

|           |          |      |    |           |
|-----------|----------|------|----|-----------|
| 0.0540346 | 1        | 602  | 11 | 0.0428841 |
| 0.0112595 | 1        | 381  | 11 | 0.0428841 |
| 0.13165   | 1        | 1121 | 29 | 0.0429018 |
| 0.0761176 | 1        | 647  | 17 | 0.0429283 |
| 0.0499682 | 1        | 629  | 16 | 0.0429459 |
| 0.0705882 | 1        | 600  | 17 | 0.0429459 |
| 0.0519742 | 1        | 799  | 22 | 0.0429459 |
| 0.0928962 | 1        | 799  | 22 | 0.0429459 |
| 0.0727059 | 1        | 618  | 18 | 0.0430342 |
| 0.018207  | 0.580442 | 634  | 18 | 0.0430607 |
| 0.0769412 | 1        | 654  | 18 | 0.043096  |
| 0.0701176 | 1        | 596  | 17 | 0.0431136 |
| 0.0745882 | 1        | 634  | 18 | 0.0431666 |
| 0.0718824 | 1        | 611  | 17 | 0.0431666 |
| 0.0481231 | 1        | 591  | 11 | 0.0432107 |
| 0.0677707 | 1        | 577  | 16 | 0.0432196 |
| 0.0796687 | 1        | 683  | 13 | 0.0432461 |
| 0.0775822 | 1        | 661  | 18 | 0.0432461 |
| 0.0666115 | 1        | 644  | 18 | 0.0432461 |
| 0.0903529 | 1        | 768  | 17 | 0.0432461 |
| 0.0715457 | 1        | 611  | 17 | 0.0432461 |
| 0.0346817 | 1        | 589  | 17 | 0.0432461 |
| 0.070732  | 1        | 602  | 11 | 0.0432461 |
| 0.0765882 | 1        | 651  | 18 | 0.0432725 |
| 0.0276553 | 1        | 790  | 22 | 0.0432725 |
| 0.0739437 | 1        | 630  | 18 | 0.0432902 |
| 0.045203  | 1        | 588  | 16 | 0.043299  |
| 0.0728235 | 1        | 619  | 18 | 0.0433961 |
| 0.0725882 | 1        | 617  | 17 | 0.0434138 |
| 0.0624818 | 1        | 645  | 15 | 0.0434756 |
| 0.0702353 | 1        | 597  | 11 | 0.0434844 |
| 0.0821725 | 1        | 702  | 20 | 0.0435374 |
| 0.0285843 | 0.424749 | 598  | 17 | 0.0435462 |
| 0.0453017 | 1        | 714  | 16 | 0.043555  |
| 0.0515993 | 1        | 663  | 18 | 0.0435727 |
| 0.029104  | 1        | 637  | 18 | 0.0436168 |
| 0.0697647 | 1        | 593  | 17 | 0.0436786 |
| 0.0536425 | 1        | 458  | 12 | 0.0436874 |
| 0.073131  | 1        | 629  | 16 | 0.0437139 |
| 0.0844706 | 1        | 718  | 16 | 0.0437227 |
| 0.12873   | 1        | 1169 | 33 | 0.0437227 |
| 0.0698542 | 1        | 599  | 17 | 0.0437404 |
| 0.0909624 | 1        | 775  | 22 | 0.043758  |
| 0.0624706 | 1        | 531  | 13 | 0.0437669 |
| 0.0402142 | 1        | 661  | 16 | 0.0437757 |
| 0.0507799 | 1        | 433  | 12 | 0.0437757 |
| 0.0716467 | 1        | 610  | 13 | 0.0437757 |

|           |          |     |    |           |
|-----------|----------|-----|----|-----------|
| 0.0800797 | 1        | 683 | 13 | 0.0437757 |
| 0.0733708 | 1        | 626 | 17 | 0.0437845 |
| 0.0721176 | 1        | 613 | 13 | 0.043811  |
| 0.0909412 | 1        | 773 | 22 | 0.043811  |
| 0.0625882 | 0.757835 | 702 | 13 | 0.043811  |
| 0.0825882 | 1        | 702 | 13 | 0.043811  |
| 0.0874118 | 1        | 743 | 19 | 0.043811  |
| 0.0742918 | 1        | 632 | 17 | 0.0439081 |
| 0.0601176 | 1        | 511 | 10 | 0.0439258 |
| 0.0811765 | 1        | 690 | 20 | 0.0439346 |
| 0.080507  | 1        | 686 | 14 | 0.0439434 |
| 0.0745918 | 1        | 635 | 18 | 0.0439434 |
| 0.0448235 | 1        | 381 | 10 | 0.0439434 |
| 0.074933  | 1        | 643 | 18 | 0.0439523 |
| 0.082154  | 1        | 714 | 19 | 0.0439523 |
| 0.0905882 | 1        | 770 | 19 | 0.0439611 |
| 0.0722353 | 1        | 614 | 16 | 0.0439611 |
| 0.0804422 | 1        | 684 | 19 | 0.0439611 |
| 0.0759334 | 1        | 844 | 24 | 0.0440052 |
| 0.068     | 1        | 578 | 14 | 0.0440141 |
| 0.0694118 | 1        | 590 | 16 | 0.0440229 |
| 0.0694118 | 1        | 590 | 17 | 0.0440229 |
| 0.0722849 | 1        | 615 | 17 | 0.0440405 |
| 0.0692711 | 1        | 594 | 12 | 0.0440759 |
| 0.0812941 | 1        | 691 | 18 | 0.0440935 |
| 0.054     | 1        | 459 | 11 | 0.0440935 |
| 0.0704706 | 1        | 599 | 17 | 0.04412   |
| 0.0627345 | 1        | 535 | 15 | 0.04412   |
| 0.0711765 | 1        | 605 | 17 | 0.0441288 |
| 0.0290844 | 1        | 648 | 18 | 0.0441465 |
| 0.0393983 | 1        | 461 | 13 | 0.0441465 |
| 0.0677566 | 1        | 775 | 22 | 0.044173  |
| 0.0701878 | 1        | 598 | 17 | 0.044173  |
| 0.0891765 | 1        | 758 | 14 | 0.0441906 |
| 0.0736261 | 1        | 627 | 18 | 0.0441906 |
| 0.0535578 | 1        | 703 | 15 | 0.0441906 |
| 0.0384959 | 1        | 604 | 17 | 0.0441906 |
| 0.0710588 | 1        | 604 | 17 | 0.0441906 |
| 0.0614862 | 1        | 868 | 23 | 0.0442171 |
| 0.0729412 | 1        | 620 | 10 | 0.0442436 |
| 0.0727059 | 1        | 618 | 14 | 0.0442524 |
| 0.0714286 | 1        | 634 | 18 | 0.0442524 |
| 0.0835294 | 1        | 710 | 20 | 0.0442612 |
| 0.0438056 | 1        | 675 | 17 | 0.0442612 |
| 0.0759211 | 1        | 647 | 18 | 0.0442612 |
| 0.0690824 | 1        | 591 | 16 | 0.04427   |
| 0.0897677 | 1        | 765 | 21 | 0.0442877 |

|           |          |      |    |           |
|-----------|----------|------|----|-----------|
| 0.0756471 | 1        | 643  | 18 | 0.0443054 |
| 0.040431  | 1        | 349  | 10 | 0.0443495 |
| 0.0696471 | 1        | 592  | 12 | 0.0444025 |
| 0.0743122 | 1        | 786  | 21 | 0.0444378 |
| 0.065369  | 1        | 581  | 15 | 0.0444378 |
| 0.0672456 | 1        | 573  | 16 | 0.0444554 |
| 0.0766878 | 1        | 652  | 16 | 0.0444554 |
| 0.117566  | 1        | 1018 | 27 | 0.0444907 |
| 0.0862353 | 1        | 733  | 19 | 0.0444996 |
| 0.0687691 | 1        | 676  | 19 | 0.0445172 |
| 0.0822353 | 1        | 699  | 20 | 0.0445878 |
| 0.0698824 | 1        | 594  | 17 | 0.0446143 |
| 0.0396848 | 1        | 685  | 20 | 0.0447291 |
| 0.0574941 | 1        | 491  | 13 | 0.0447291 |
| 0.0354008 | 1        | 722  | 20 | 0.0447291 |
| 0.0845385 | 1        | 719  | 20 | 0.0447291 |
| 0.0701176 | 1        | 596  | 13 | 0.0447467 |
| 0.0848235 | 1        | 721  | 16 | 0.0447556 |
| 0.0898345 | 1        | 798  | 21 | 0.0447556 |
| 0.0235595 | 1        | 673  | 19 | 0.0447556 |
| 0.0719737 | 1        | 613  | 15 | 0.0447644 |
| 0.0715624 | 1        | 611  | 17 | 0.0447644 |
| 0.0536664 | 1        | 464  | 13 | 0.0447644 |
| 0.072292  | 1        | 616  | 17 | 0.0448262 |
| 0.0325882 | 0.452614 | 612  | 13 | 0.0448262 |
| 0.0713202 | 1        | 611  | 17 | 0.044835  |
| 0.0802353 | 1        | 682  | 16 | 0.0448703 |
| 0.0704706 | 1        | 599  | 17 | 0.0448703 |
| 0.0716471 | 1        | 609  | 16 | 0.0448968 |
| 0.0268465 | 1        | 639  | 18 | 0.0449674 |
| 0.0639128 | 1        | 639  | 18 | 0.0449762 |
| 0.0708947 | 1        | 607  | 17 | 0.0449851 |
| 0.0465599 | 1        | 695  | 20 | 0.0450292 |
| 0.0698824 | 1        | 594  | 17 | 0.0450292 |
| 0.0774118 | 1        | 658  | 18 | 0.0450469 |
| 0.0730626 | 1        | 626  | 13 | 0.0450469 |
| 0.0702353 | 1        | 597  | 17 | 0.0450469 |
| 0.0581979 | 1        | 591  | 17 | 0.0450557 |
| 0.0798824 | 1        | 679  | 17 | 0.0450645 |
| 0.0180566 | 1        | 611  | 17 | 0.0450822 |
| 0.0639515 | 1        | 548  | 14 | 0.045091  |
| 0.0660417 | 1        | 634  | 16 | 0.045091  |
| 0.0812941 | 1        | 691  | 19 | 0.045091  |
| 0.0738225 | 1        | 652  | 18 | 0.0451087 |
| 0.117744  | 1        | 1004 | 28 | 0.0451175 |
| 0.064346  | 1        | 549  | 16 | 0.0451263 |
| 0.0522353 | 1        | 444  | 13 | 0.0451263 |

|           |          |      |    |           |
|-----------|----------|------|----|-----------|
| 0.089917  | 1        | 791  | 15 | 0.0451263 |
| 0.071871  | 1        | 615  | 17 | 0.0451528 |
| 0.0715459 | 1        | 610  | 17 | 0.0451793 |
| 0.0711619 | 1        | 610  | 17 | 0.0451793 |
| 0.0727059 | 1        | 618  | 10 | 0.0452058 |
| 0.0454545 | 1        | 599  | 17 | 0.0452234 |
| 0.106531  | 1        | 964  | 26 | 0.0452323 |
| 0.0455174 | 1        | 691  | 17 | 0.0452764 |
| 0.0956471 | 1        | 813  | 13 | 0.0452852 |
| 0.0903529 | 1        | 768  | 22 | 0.0453029 |
| 0.0728235 | 1        | 619  | 14 | 0.0453029 |
| 0.0764706 | 1        | 650  | 17 | 0.0453117 |
| 0.0204153 | 0.269231 | 650  | 17 | 0.0453117 |
| 0.0776288 | 1        | 660  | 19 | 0.0453205 |
| 0.0762353 | 1        | 648  | 12 | 0.0453382 |
| 0.0818672 | 1        | 698  | 19 | 0.0453382 |
| 0.0847059 | 1        | 720  | 15 | 0.0453647 |
| 0.0698824 | 1        | 594  | 17 | 0.0453823 |
| 0.0375169 | 1        | 637  | 18 | 0.0454    |
| 0.123176  | 1        | 1047 | 22 | 0.0454    |
| 0.0715294 | 1        | 608  | 17 | 0.0454    |
| 0.0531469 | 1        | 760  | 18 | 0.0454265 |
| 0.0557647 | 1        | 474  | 14 | 0.0454353 |
| 0.0641577 | 1        | 612  | 17 | 0.0454618 |
| 0.0665882 | 1        | 566  | 14 | 0.0454618 |
| 0.068925  | 1        | 586  | 16 | 0.0454706 |
| 0.0666439 | 1        | 586  | 16 | 0.0454706 |
| 0.0432358 | 1        | 597  | 15 | 0.0454971 |
| 0.114057  | 1        | 981  | 27 | 0.0455147 |
| 0.0726932 | 1        | 620  | 18 | 0.0455942 |
| 0.0787059 | 1        | 669  | 19 | 0.0456118 |
| 0.0694118 | 1        | 590  | 17 | 0.0456118 |
| 0.0397647 | 1        | 338  | 10 | 0.0456207 |
| 0.0676471 | 0.991379 | 580  | 10 | 0.045656  |
| 0.0874985 | 1        | 744  | 21 | 0.045656  |
| 0.0817477 | 1        | 696  | 20 | 0.045656  |
| 0.103529  | 1        | 880  | 25 | 0.0456648 |
| 0.0661176 | 1        | 562  | 16 | 0.0456736 |
| 0.030051  | 1        | 607  | 15 | 0.0456913 |
| 0.0426193 | 1        | 617  | 12 | 0.0456913 |
| 0.0716471 | 1        | 609  | 17 | 0.0457001 |
| 0.058626  | 1        | 611  | 17 | 0.0457178 |
| 0.021109  | 1        | 603  | 17 | 0.0457531 |
| 0.0458864 | 1        | 396  | 11 | 0.0457619 |
| 0.068893  | 1        | 590  | 17 | 0.0457707 |
| 0.0407771 | 1        | 531  | 29 | 0.0457707 |
| 0.0697647 | 1        | 593  | 16 | 0.0457796 |



|           |          |     |    |           |
|-----------|----------|-----|----|-----------|
| 0.0812941 | 1        | 691 | 20 | 0.0457884 |
| 0.0803395 | 1        | 691 | 20 | 0.0457884 |
| 0.0689412 | 1        | 586 | 14 | 0.0458149 |
| 0.0790588 | 1        | 672 | 13 | 0.0458414 |
| 0.0704706 | 1        | 599 | 13 | 0.0458414 |
| 0.0737497 | 1        | 640 | 17 | 0.0458414 |
| 0.0810938 | 1        | 691 | 16 | 0.045912  |
| 0.0970588 | 1        | 825 | 23 | 0.0459561 |
| 0.0727529 | 1        | 620 | 16 | 0.0459561 |
| 0.062     | 1        | 527 | 15 | 0.0459914 |
| 0.0693777 | 1        | 592 | 17 | 0.0459914 |
| 0.0731765 | 1        | 622 | 16 | 0.0459914 |
| 0.0790554 | 1        | 770 | 16 | 0.0459914 |
| 0.0245882 | 0.349498 | 598 | 16 | 0.0460091 |
| 0.0697406 | 1        | 605 | 17 | 0.0460091 |
| 0.0718824 | 1        | 611 | 11 | 0.0460091 |
| 0.0789899 | 1        | 782 | 22 | 0.0460444 |
| 0.0696471 | 1        | 592 | 17 | 0.0460444 |
| 0.0751921 | 1        | 685 | 18 | 0.0460444 |
| 0.107276  | 1        | 923 | 22 | 0.0460532 |
| 0.0803529 | 1        | 683 | 19 | 0.046062  |
| 0.0658373 | 1        | 598 | 11 | 0.046062  |
| 0.0353721 | 1        | 598 | 11 | 0.046062  |
| 0.0805666 | 1        | 728 | 20 | 0.046062  |
| 0.0688761 | 1        | 611 | 16 | 0.0460885 |
| 0.0507793 | 1        | 808 | 18 | 0.0460885 |
| 0.0510596 | 1        | 665 | 19 | 0.0460885 |
| 0.0798824 | 1        | 679 | 19 | 0.0460973 |
| 0.0925948 | 1        | 789 | 12 | 0.0460973 |
| 0.0749472 | 1        | 639 | 17 | 0.0460973 |
| 0.0749912 | 1        | 639 | 17 | 0.0460973 |
| 0.0688574 | 1        | 593 | 17 | 0.046115  |
| 0.0495115 | 1        | 598 | 17 | 0.0461238 |
| 0.0743529 | 1        | 632 | 17 | 0.0461327 |
| 0.0740697 | 1        | 631 | 17 | 0.0461327 |
| 0.0736175 | 1        | 627 | 18 | 0.046168  |
| 0.0315627 | 1        | 593 | 17 | 0.0461944 |
| 0.10832   | 1        | 927 | 26 | 0.0461944 |
| 0.0685882 | 1        | 583 | 13 | 0.0462033 |
| 0.0794118 | 1        | 675 | 19 | 0.0462121 |
| 0.0690588 | 1        | 587 | 12 | 0.0462298 |
| 0.08      | 1        | 680 | 19 | 0.0462298 |
| 0.0771308 | 1        | 657 | 19 | 0.0462474 |
| 0.0342924 | 0.448541 | 651 | 19 | 0.0462739 |
| 0.0485654 | 0.971765 | 425 | 10 | 0.0462739 |
| 0.0831765 | 1        | 707 | 20 | 0.0462739 |
| 0.0688113 | 1        | 631 | 17 | 0.0462739 |

|           |           |     |    |           |
|-----------|-----------|-----|----|-----------|
| 0.0942353 | 1         | 801 | 19 | 0.0462827 |
| 0.0433774 | 1         | 486 | 14 | 0.0462827 |
| 0.0073961 | 0.0989011 | 637 | 23 | 0.0462916 |
| 0.0735895 | 1         | 630 | 17 | 0.0463092 |
| 0.0767059 | 1         | 652 | 18 | 0.046318  |
| 0.0794118 | 1         | 675 | 19 | 0.046318  |
| 0.0092495 | 0.124019  | 637 | 17 | 0.0463445 |
| 0.0735294 | 1         | 625 | 13 | 0.0463622 |
| 0.0698439 | 1         | 595 | 17 | 0.0463622 |
| 0.0618824 | 1         | 526 | 15 | 0.046371  |
| 0.0712941 | 1         | 606 | 15 | 0.046371  |
| 0.0708228 | 1         | 618 | 18 | 0.0463798 |
| 0.0635228 | 1         | 590 | 11 | 0.0463798 |
| 0.0396074 | 1         | 339 | 10 | 0.0463887 |
| 0.0162132 | 1         | 637 | 17 | 0.046424  |
| 0.0714118 | 1         | 607 | 17 | 0.046424  |
| 0.0715294 | 1         | 608 | 14 | 0.046424  |
| 0.0735294 | 1         | 625 | 18 | 0.0464328 |
| 0.0755294 | 1         | 642 | 12 | 0.0464328 |
| 0.0963529 | 1         | 819 | 23 | 0.0464681 |
| 0.0574308 | 1         | 490 | 10 | 0.0464769 |
| 0.076977  | 1         | 659 | 18 | 0.0464769 |
| 0.070555  | 1         | 600 | 17 | 0.0465034 |
| 0.0672825 | 1         | 590 | 11 | 0.0465211 |
| 0.0620673 | 1         | 529 | 11 | 0.0465652 |
| 0.103294  | 1         | 878 | 24 | 0.046574  |
| 0.103294  | 1         | 878 | 24 | 0.046574  |
| 0.073909  | 1         | 630 | 17 | 0.0466005 |
| 0.050749  | 1         | 620 | 14 | 0.0466005 |
| 0.0709302 | 1         | 610 | 13 | 0.0466182 |
| 0.0860266 | 1         | 732 | 20 | 0.0466447 |
| 0.0231263 | 1         | 739 | 21 | 0.0466447 |
| 0.0618599 | 1         | 610 | 15 | 0.0466447 |
| 0.0661532 | 1         | 670 | 13 | 0.0466447 |
| 0.0685678 | 1         | 642 | 16 | 0.0466447 |
| 0.0697237 | 1         | 593 | 17 | 0.0466447 |
| 0.0801177 | 1         | 681 | 15 | 0.0467064 |
| 0.0781525 | 1         | 665 | 18 | 0.0467418 |
| 0.070262  | 1         | 598 | 13 | 0.0467418 |
| 0.0658297 | 1         | 603 | 17 | 0.0467418 |
| 0.0267983 | 1         | 760 | 22 | 0.0467418 |
| 0.0933678 | 1         | 794 | 22 | 0.0467506 |
| 0.0675376 | 1         | 579 | 11 | 0.0467771 |
| 0.116706  | 1         | 992 | 25 | 0.0467947 |
| 0.0685774 | 1         | 591 | 12 | 0.0468124 |
| 0.0376564 | 1         | 590 | 16 | 0.0468124 |
| 0.0827651 | 1         | 704 | 20 | 0.0468124 |

|           |   |      |    |           |
|-----------|---|------|----|-----------|
| 0.0974118 | 1 | 828  | 20 | 0.04683   |
| 0.0513364 | 1 | 678  | 18 | 0.04683   |
| 0.0991511 | 1 | 876  | 18 | 0.04683   |
| 0.0426991 | 1 | 467  | 12 | 0.04683   |
| 0.0704439 | 1 | 603  | 17 | 0.0468565 |
| 0.0703529 | 1 | 598  | 15 | 0.0468565 |
| 0.0707059 | 1 | 601  | 17 | 0.0468565 |
| 0.0496792 | 1 | 604  | 14 | 0.0468565 |
| 0.0724706 | 1 | 616  | 17 | 0.0468918 |
| 0.0467033 | 1 | 612  | 14 | 0.0469271 |
| 0.0492264 | 1 | 420  | 12 | 0.0469271 |
| 0.0809636 | 1 | 689  | 19 | 0.0469713 |
| 0.0754118 | 1 | 641  | 18 | 0.0469801 |
| 0.0763529 | 1 | 649  | 18 | 0.0469889 |
| 0.0775294 | 1 | 659  | 18 | 0.0469889 |
| 0.0535294 | 1 | 455  | 13 | 0.0469889 |
| 0.0794578 | 1 | 680  | 19 | 0.0469889 |
| 0.0706241 | 1 | 602  | 17 | 0.0469889 |
| 0.0583039 | 1 | 594  | 17 | 0.0469889 |
| 0.115647  | 1 | 983  | 28 | 0.0469978 |
| 0.0664254 | 1 | 569  | 11 | 0.0470154 |
| 0.108718  | 1 | 939  | 25 | 0.0470154 |
| 0.0694118 | 1 | 590  | 17 | 0.0470154 |
| 0.0754935 | 1 | 654  | 13 | 0.0470154 |
| 0.0707757 | 1 | 604  | 16 | 0.0470596 |
| 0.0429767 | 1 | 637  | 18 | 0.0470596 |
| 0.094404  | 1 | 803  | 20 | 0.0470596 |
| 0.0707403 | 1 | 602  | 17 | 0.0470596 |
| 0.133059  | 1 | 1131 | 31 | 0.0470684 |
| 0.0707059 | 1 | 601  | 17 | 0.0471125 |
| 0.0689412 | 1 | 586  | 17 | 0.0471302 |
| 0.0885681 | 1 | 767  | 22 | 0.0471302 |
| 0.0876271 | 1 | 767  | 22 | 0.0471302 |
| 0.0710177 | 1 | 605  | 16 | 0.0471302 |
| 0.0896471 | 1 | 762  | 22 | 0.0471743 |
| 0.0698824 | 1 | 594  | 17 | 0.0471743 |
| 0.0742353 | 1 | 631  | 18 | 0.0472008 |
| 0.0830588 | 1 | 706  | 20 | 0.0472008 |
| 0.0697647 | 1 | 593  | 17 | 0.0472008 |
| 0.0707059 | 1 | 601  | 17 | 0.0472096 |
| 0.0349613 | 1 | 907  | 25 | 0.0472096 |
| 0.0316759 | 1 | 516  | 14 | 0.0472449 |
| 0.0785882 | 1 | 668  | 18 | 0.0472449 |
| 0.0649412 | 1 | 552  | 12 | 0.0472714 |
| 0.0523321 | 1 | 607  | 17 | 0.0472891 |
| 0.0754318 | 1 | 642  | 17 | 0.0472891 |
| 0.0753012 | 1 | 850  | 22 | 0.0472891 |

|           |          |     |    |           |
|-----------|----------|-----|----|-----------|
| 0.0705009 | 1        | 608 | 10 | 0.0473332 |
| 0.069205  | 1        | 598 | 13 | 0.047342  |
| 0.0696203 | 1        | 594 | 13 | 0.047342  |
| 0.0703529 | 1        | 598 | 17 | 0.047342  |
| 0.0607955 | 1        | 564 | 16 | 0.047342  |
| 0.0862353 | 1        | 733 | 21 | 0.0473773 |
| 0.0514049 | 1        | 644 | 18 | 0.0473773 |
| 0.0538824 | 1        | 458 | 12 | 0.0473862 |
| 0.0689736 | 1        | 590 | 17 | 0.0473862 |
| 0.0699088 | 1        | 598 | 17 | 0.0473862 |
| 0.0931568 | 1        | 795 | 22 | 0.0473862 |
| 0.0694594 | 1        | 645 | 18 | 0.0473862 |
| 0.0690588 | 1        | 587 | 12 | 0.0474126 |
| 0.0695294 | 1        | 591 | 16 | 0.047448  |
| 0.0558743 | 1        | 487 | 10 | 0.0475098 |
| 0.0636471 | 1        | 541 | 16 | 0.0475451 |
| 0.0427059 | 1        | 363 | 10 | 0.0475451 |
| 0.0691765 | 1        | 588 | 15 | 0.0475804 |
| 0.0360778 | 0.542517 | 588 | 15 | 0.0475804 |
| 0.0601495 | 1        | 531 | 10 | 0.0475804 |
| 0.0697892 | 1        | 596 | 16 | 0.0475804 |
| 0.0681475 | 1        | 586 | 15 | 0.0475804 |
| 0.0554004 | 1        | 595 | 15 | 0.0475892 |
| 0.0702353 | 1        | 597 | 17 | 0.047598  |
| 0.0856471 | 1        | 728 | 17 | 0.047598  |
| 0.0376073 | 1        | 767 | 21 | 0.0476245 |
| 0.0461709 | 1        | 709 | 20 | 0.0476245 |
| 0.0818824 | 1        | 696 | 20 | 0.0476333 |
| 0.0795294 | 1        | 676 | 19 | 0.0476422 |
| 0.072299  | 1        | 617 | 18 | 0.047651  |
| 0.0869742 | 1        | 856 | 32 | 0.0476775 |
| 0.111486  | 1        | 959 | 23 | 0.0476775 |
| 0.0705615 | 1        | 622 | 18 | 0.047704  |
| 0.031566  | 1        | 615 | 17 | 0.047704  |
| 0.0463759 | 1        | 604 | 12 | 0.0477216 |
| 0.0898824 | 1        | 764 | 20 | 0.0477481 |
| 0.0735294 | 1        | 625 | 17 | 0.0477569 |
| 0.0293982 | 1        | 636 | 15 | 0.0477746 |
| 0.0711955 | 1        | 611 | 17 | 0.0477922 |
| 0.0541424 | 1        | 464 | 13 | 0.0478011 |
| 0.0866142 | 1        | 748 | 21 | 0.0478187 |
| 0.0641176 | 1        | 545 | 15 | 0.0478187 |
| 0.0717726 | 1        | 611 | 17 | 0.0478364 |
| 0.0822353 | 1        | 699 | 18 | 0.0478717 |
| 0.0812941 | 1        | 691 | 20 | 0.0478805 |
| 0.0717095 | 1        | 620 | 17 | 0.0478805 |
| 0.053219  | 0.851504 | 532 | 12 | 0.0478982 |

|           |   |      |    |           |
|-----------|---|------|----|-----------|
| 0.0618824 | 1 | 526  | 14 | 0.047907  |
| 0.0686636 | 1 | 596  | 17 | 0.0479158 |
| 0.0688235 | 1 | 585  | 16 | 0.0479246 |
| 0.0700809 | 1 | 598  | 16 | 0.0479246 |
| 0.072     | 1 | 612  | 14 | 0.0479246 |
| 0.070106  | 1 | 602  | 14 | 0.0479335 |
| 0.0675906 | 1 | 595  | 13 | 0.0479335 |
| 0.0696471 | 1 | 592  | 17 | 0.0479423 |
| 0.043662  | 1 | 372  | 11 | 0.0479511 |
| 0.0656643 | 1 | 559  | 16 | 0.04796   |
| 0.0754118 | 1 | 641  | 18 | 0.04796   |
| 0.0925882 | 1 | 787  | 22 | 0.0479864 |
| 0.0821228 | 1 | 701  | 13 | 0.0479864 |
| 0.0854118 | 1 | 726  | 19 | 0.0479953 |
| 0.0867059 | 1 | 737  | 21 | 0.0480041 |
| 0.0705882 | 1 | 600  | 17 | 0.0480041 |
| 0.127529  | 1 | 1084 | 30 | 0.0480129 |
| 0.0664635 | 1 | 567  | 15 | 0.0480306 |
| 0.0642507 | 1 | 656  | 17 | 0.0480306 |
| 0.0401818 | 1 | 610  | 11 | 0.0480394 |
| 0.0689412 | 1 | 586  | 16 | 0.0480571 |
| 0.071831  | 1 | 612  | 13 | 0.0480659 |
| 0.0421436 | 1 | 891  | 25 | 0.0480659 |
| 0.0698327 | 1 | 597  | 17 | 0.0480747 |
| 0.0710588 | 1 | 604  | 17 | 0.0480835 |
| 0.0629327 | 1 | 609  | 17 | 0.0480924 |
| 0.0718824 | 1 | 611  | 17 | 0.0480924 |
| 0.0890588 | 1 | 757  | 21 | 0.0480924 |
| 0.0654118 | 1 | 556  | 16 | 0.0480924 |
| 0.0782353 | 1 | 665  | 19 | 0.04811   |
| 0.128118  | 1 | 1089 | 31 | 0.04811   |
| 0.0499807 | 1 | 777  | 22 | 0.0481365 |
| 0.10221   | 1 | 874  | 15 | 0.0481718 |
| 0.0707059 | 1 | 601  | 17 | 0.0481895 |
| 0.100471  | 1 | 854  | 24 | 0.0481895 |
| 0.0712211 | 1 | 613  | 17 | 0.0482071 |
| 0.0865238 | 1 | 739  | 12 | 0.0482071 |
| 0.088194  | 1 | 753  | 17 | 0.0482071 |
| 0.0757647 | 1 | 644  | 18 | 0.0482601 |
| 0.043728  | 1 | 373  | 11 | 0.0482689 |
| 0.0765882 | 1 | 651  | 18 | 0.0482954 |
| 0.0418224 | 1 | 593  | 17 | 0.0483219 |
| 0.0806396 | 1 | 696  | 20 | 0.048366  |
| 0.0722353 | 1 | 614  | 18 | 0.0483925 |
| 0.0398824 | 1 | 339  | 10 | 0.0483925 |
| 0.047393  | 1 | 619  | 16 | 0.0483925 |
| 0.0712941 | 1 | 606  | 16 | 0.0484013 |

|           |   |      |    |           |
|-----------|---|------|----|-----------|
| 0.0789412 | 1 | 671  | 19 | 0.0484278 |
| 0.0372667 | 1 | 607  | 17 | 0.0484366 |
| 0.0509686 | 1 | 592  | 11 | 0.0484366 |
| 0.0646644 | 1 | 605  | 17 | 0.0484366 |
| 0.0715294 | 1 | 608  | 14 | 0.0484366 |
| 0.025292  | 1 | 602  | 16 | 0.0484455 |
| 0.0755294 | 1 | 642  | 12 | 0.0485073 |
| 0.0698824 | 1 | 594  | 14 | 0.0485249 |
| 0.0709412 | 1 | 603  | 17 | 0.0485426 |
| 0.101412  | 1 | 862  | 18 | 0.0485426 |
| 0.0655499 | 1 | 630  | 12 | 0.0485426 |
| 0.025166  | 1 | 599  | 17 | 0.0485514 |
| 0.0205146 | 1 | 806  | 23 | 0.0485514 |
| 0.0562818 | 1 | 620  | 10 | 0.0485602 |
| 0.0805125 | 1 | 685  | 19 | 0.0485691 |
| 0.0643591 | 1 | 595  | 17 | 0.0485691 |
| 0.0687059 | 1 | 584  | 13 | 0.0485691 |
| 0.0489515 | 1 | 691  | 16 | 0.0485691 |
| 0.0721069 | 1 | 615  | 16 | 0.0485691 |
| 0.0701176 | 1 | 596  | 13 | 0.0485779 |
| 0.0711765 | 1 | 605  | 18 | 0.0485779 |
| 0.0902353 | 1 | 767  | 21 | 0.0486132 |
| 0.0778823 | 1 | 662  | 19 | 0.048622  |
| 0.0689979 | 1 | 588  | 17 | 0.048622  |
| 0.0700541 | 1 | 699  | 20 | 0.048622  |
| 0.0710928 | 1 | 605  | 17 | 0.048622  |
| 0.0853659 | 1 | 819  | 22 | 0.048622  |
| 0.0172567 | 1 | 678  | 19 | 0.0486397 |
| 0.0780627 | 1 | 685  | 18 | 0.0486662 |
| 0.0699835 | 1 | 595  | 12 | 0.0486662 |
| 0.0633721 | 1 | 545  | 10 | 0.0486662 |
| 0.0601176 | 1 | 511  | 15 | 0.0486662 |
| 0.0723469 | 1 | 619  | 17 | 0.048675  |
| 0.0534236 | 1 | 600  | 16 | 0.048675  |
| 0.0854118 | 1 | 726  | 18 | 0.048675  |
| 0.0751993 | 1 | 651  | 17 | 0.0487368 |
| 0.0650588 | 1 | 553  | 16 | 0.0487456 |
| 0.0765572 | 1 | 660  | 18 | 0.0487456 |
| 0.0778597 | 1 | 665  | 19 | 0.0487544 |
| 0.119647  | 1 | 1017 | 28 | 0.0487544 |
| 0.0707059 | 1 | 601  | 17 | 0.0487721 |
| 0.0704159 | 1 | 601  | 17 | 0.0487721 |
| 0.108941  | 1 | 926  | 25 | 0.0487721 |
| 0.0827602 | 1 | 710  | 20 | 0.0487898 |
| 0.0727059 | 1 | 618  | 14 | 0.0488162 |
| 0.0702353 | 1 | 597  | 17 | 0.0488162 |
| 0.0901572 | 1 | 774  | 19 | 0.0488251 |

|           |   |     |    |           |
|-----------|---|-----|----|-----------|
| 0.0908131 | 1 | 774 | 19 | 0.0488251 |
| 0.02751   | 1 | 528 | 15 | 0.0488339 |
| 0.0621176 | 1 | 528 | 15 | 0.0488339 |
| 0.0721176 | 1 | 613 | 18 | 0.0488604 |
| 0.0708006 | 1 | 604 | 17 | 0.0488604 |
| 0.0522085 | 1 | 604 | 17 | 0.0488604 |
| 0.0353526 | 1 | 590 | 16 | 0.0488604 |
| 0.0768869 | 1 | 654 | 18 | 0.0488604 |
| 0.0803529 | 1 | 683 | 18 | 0.0488604 |
| 0.056042  | 1 | 480 | 10 | 0.0488604 |
| 0.051557  | 1 | 649 | 18 | 0.0488604 |
| 0.0300508 | 1 | 592 | 16 | 0.0488604 |
| 0.0622382 | 1 | 743 | 18 | 0.0488692 |
| 0.0768516 | 1 | 662 | 18 | 0.0488692 |
| 0.0652547 | 1 | 684 | 15 | 0.0488692 |
| 0.0722353 | 1 | 614 | 17 | 0.0488692 |
| 0.0742424 | 1 | 637 | 18 | 0.0488692 |
| 0.0763529 | 1 | 649 | 16 | 0.048878  |
| 0.0705882 | 1 | 600 | 17 | 0.048878  |
| 0.0771761 | 1 | 657 | 16 | 0.048878  |
| 0.0727209 | 1 | 619 | 18 | 0.0488869 |
| 0.0689776 | 1 | 589 | 17 | 0.0488869 |
| 0.110259  | 1 | 963 | 25 | 0.0489222 |
| 0.0712941 | 1 | 606 | 17 | 0.0489398 |
| 0.0710588 | 1 | 604 | 13 | 0.0489398 |
| 0.0706211 | 1 | 606 | 12 | 0.0489575 |
| 0.0427488 | 1 | 586 | 16 | 0.0489751 |
| 0.0745043 | 1 | 635 | 18 | 0.048984  |
| 0.0714118 | 1 | 607 | 17 | 0.0489928 |
| 0.0717122 | 1 | 614 | 13 | 0.0489928 |
| 0.0695294 | 1 | 591 | 17 | 0.0489928 |
| 0.0684561 | 1 | 607 | 17 | 0.0490193 |
| 0.101882  | 1 | 866 | 25 | 0.0490369 |
| 0.0475071 | 1 | 404 | 12 | 0.0490457 |
| 0.0747059 | 1 | 635 | 18 | 0.049081  |
| 0.0569058 | 1 | 487 | 11 | 0.0490899 |
| 0.0413582 | 1 | 514 | 14 | 0.0491164 |
| 0.0958824 | 1 | 815 | 15 | 0.0491164 |
| 0.0772941 | 1 | 657 | 18 | 0.0491252 |
| 0.0841176 | 1 | 715 | 20 | 0.0491428 |
| 0.0696495 | 1 | 632 | 18 | 0.0491428 |
| 0.0624706 | 1 | 531 | 11 | 0.0491428 |
| 0.0689412 | 1 | 586 | 17 | 0.0491428 |
| 0.048511  | 1 | 606 | 17 | 0.0491693 |
| 0.0959643 | 1 | 818 | 18 | 0.0491782 |
| 0.0878799 | 1 | 749 | 21 | 0.0491782 |
| 0.0923529 | 1 | 785 | 22 | 0.0491782 |

|           |   |     |    |           |
|-----------|---|-----|----|-----------|
| 0.0581176 | 1 | 494 | 10 | 0.0492135 |
| 0.0709112 | 1 | 607 | 15 | 0.0492223 |
| 0.0623529 | 1 | 530 | 15 | 0.0492223 |
| 0.0711765 | 1 | 605 | 14 | 0.0492576 |
| 0.0634396 | 1 | 633 | 18 | 0.0493194 |
| 0.0788362 | 1 | 672 | 16 | 0.0493282 |
| 0.0725882 | 1 | 617 | 17 | 0.0493547 |
| 0.0823529 | 1 | 700 | 20 | 0.0493635 |
| 0.0704903 | 1 | 601 | 17 | 0.04939   |
| 0.0702021 | 1 | 601 | 17 | 0.04939   |
| 0.054202  | 1 | 594 | 17 | 0.04939   |
| 0.0695294 | 1 | 591 | 13 | 0.0494165 |
| 0.0693906 | 1 | 591 | 13 | 0.0494165 |
| 0.0727889 | 1 | 623 | 18 | 0.0494342 |
| 0.0718824 | 1 | 611 | 17 | 0.0494342 |
| 0.0702557 | 1 | 599 | 17 | 0.0494518 |
| 0.0704706 | 1 | 599 | 17 | 0.0494518 |
| 0.0999534 | 1 | 858 | 24 | 0.049496  |
| 0.0215465 | 1 | 620 | 18 | 0.0495136 |
| 0.0261559 | 1 | 620 | 18 | 0.0495136 |
| 0.0655195 | 1 | 594 | 17 | 0.0495136 |
| 0.0708235 | 1 | 602 | 17 | 0.0495136 |
| 0.0691765 | 1 | 588 | 17 | 0.0495224 |
| 0.0691709 | 1 | 604 | 14 | 0.0495401 |
| 0.0707591 | 1 | 604 | 14 | 0.0495401 |
| 0.0850797 | 1 | 747 | 17 | 0.0495401 |
| 0.0709412 | 1 | 603 | 17 | 0.0495489 |
| 0.0685621 | 1 | 586 | 16 | 0.0495489 |
| 0.0613554 | 1 | 593 | 15 | 0.0495577 |
| 0.0650234 | 1 | 612 | 16 | 0.0495666 |
| 0.0732941 | 1 | 623 | 17 | 0.0495842 |
| 0.0775852 | 1 | 676 | 17 | 0.0495842 |
| 0.0755821 | 1 | 646 | 18 | 0.0495842 |
| 0.0812224 | 1 | 699 | 18 | 0.0495842 |
| 0.0714118 | 1 | 607 | 16 | 0.0495842 |
| 0.0703529 | 1 | 598 | 16 | 0.0495931 |
| 0.0696269 | 1 | 599 | 12 | 0.0496019 |
| 0.0447408 | 1 | 567 | 14 | 0.0496284 |
| 0.0691071 | 1 | 589 | 17 | 0.0496284 |
| 0.0700362 | 1 | 600 | 14 | 0.0496372 |
| 0.0581737 | 1 | 495 | 10 | 0.0496372 |
| 0.0456436 | 1 | 395 | 11 | 0.0496637 |
| 0.0689412 | 1 | 586 | 16 | 0.0496637 |
| 0.0724365 | 1 | 616 | 17 | 0.0496637 |
| 0.0705882 | 1 | 600 | 17 | 0.0496725 |
| 0.0312922 | 1 | 440 | 13 | 0.0496901 |
| 0.0793557 | 1 | 675 | 18 | 0.0496901 |



|           |          |     |    |           |
|-----------|----------|-----|----|-----------|
| 0.0665882 | 1        | 566 | 13 | 0.0497166 |
| 0.0556471 | 0.849192 | 557 | 16 | 0.0497255 |
| 0.0856471 | 1        | 728 | 21 | 0.0497255 |
| 0.0542534 | 1        | 537 | 38 | 0.0497608 |
| 0.101828  | 1        | 880 | 25 | 0.0497608 |
| 0.0722425 | 1        | 615 | 17 | 0.0497608 |
| 0.0685308 | 1        | 598 | 12 | 0.0497608 |
| 0.102941  | 1        | 875 | 25 | 0.0497696 |
| 0.0643529 | 1        | 547 | 14 | 0.0497784 |
| 0.065439  | 1        | 597 | 17 | 0.0498226 |
| 0.072     | 1        | 612 | 17 | 0.0498226 |
| 0.0715373 | 1        | 611 | 17 | 0.0498226 |
| 0.0722353 | 1        | 614 | 15 | 0.0498314 |
| 0.0463529 | 1        | 394 | 11 | 0.0498402 |
| 0.0632955 | 1        | 547 | 15 | 0.0498402 |
| 0.0764706 | 1        | 650 | 18 | 0.0498579 |
| 0.0717647 | 1        | 610 | 14 | 0.0498755 |
| 0.0702868 | 1        | 598 | 11 | 0.0498844 |
| 0.0685157 | 1        | 583 | 16 | 0.0498844 |
| 0.049569  | 1        | 690 | 15 | 0.0498844 |
| 0.080611  | 1        | 686 | 17 | 0.0498932 |
| 0.0957647 | 1        | 814 | 23 | 0.0499285 |
| 0.0468933 | 1        | 400 | 12 | 0.0499285 |
| 0.0464809 | 1        | 599 | 10 | 0.0499285 |
| 0.0725882 | 1        | 617 | 14 | 0.0499285 |
| 0.0711765 | 1        | 605 | 17 | 0.0499285 |
| 0.0696471 | 1        | 592 | 17 | 0.0499462 |
| 0.0688359 | 1        | 586 | 16 | 0.049955  |
| 0.0776471 | 1        | 660 | 17 | 0.049955  |
| 0.0709602 | 1        | 606 | 14 | 0.0499638 |
| 0.0974118 | 1        | 828 | 23 | 0.0499638 |
| 0.0686836 | 1        | 588 | 17 | 0.0499815 |
| 0.0677811 | 1        | 592 | 16 | 0.0499815 |
| 0.0392413 | 1        | 602 | 14 | 0.0499903 |
| 0.0388062 | 1        | 602 | 14 | 0.0499903 |
| 0.0832161 | 1        | 710 | 20 | 0.0499991 |

Fraction of negatively enriched windows in region

MAT-score on T(H3K9me3WTFH vs. control)

|   |         |
|---|---------|
| 0 | 30.0439 |
| 0 | 17.6748 |
| 0 | 17.4832 |
| 0 | 14.4979 |
| 0 | 14.4241 |
| 0 | 14.4182 |
| 0 | 13.7909 |
| 0 | 13.4972 |
| 0 | 13.0951 |
| 0 | 13.0645 |
| 0 | 12.0556 |
| 0 | 12.0148 |
| 0 | 11.875  |
| 0 | 11.8501 |
| 0 | 11.3908 |
| 0 | 11.3908 |
| 0 | 11.2991 |
| 0 | 11.2692 |
| 0 | 11.1766 |
| 0 | 11.0064 |
| 0 | 10.8868 |
| 0 | 10.8868 |
| 0 | 10.5692 |
| 0 | 10.5293 |
| 0 | 10.5061 |
| 0 | 10.4466 |
| 0 | 10.3294 |
| 0 | 10.3005 |
| 0 | 10.1605 |
| 0 | 10.1538 |
| 0 | 10.1475 |
| 0 | 10.1439 |
| 0 | 10.1406 |
| 0 | 10.0754 |
| 0 | 10.073  |
| 0 | 10.0573 |
| 0 | 10.0433 |
| 0 | 10.0363 |
| 0 | 10.0283 |
| 0 | 10.0045 |
| 0 | 9.97339 |
| 0 | 9.81791 |
| 0 | 9.80177 |
| 0 | 9.78055 |

|   |         |
|---|---------|
| 0 | 9.77258 |
| 0 | 9.59842 |
| 0 | 9.49463 |
| 0 | 9.49463 |
| 0 | 9.48337 |
| 0 | 9.45307 |
| 0 | 9.34862 |
| 0 | 9.32652 |
| 0 | 9.3219  |
| 0 | 9.29736 |
| 0 | 9.23742 |
| 0 | 9.23022 |
| 0 | 9.21864 |
| 0 | 9.16942 |
| 0 | 9.16436 |
| 0 | 9.15871 |
| 0 | 9.15404 |
| 0 | 9.11317 |
| 0 | 9.10715 |
| 0 | 9.08449 |
| 0 | 9.0768  |
| 0 | 9.0768  |
| 0 | 9.0759  |
| 0 | 9.0671  |
| 0 | 9.04418 |
| 0 | 9.00285 |
| 0 | 8.91114 |
| 0 | 8.85823 |
| 0 | 8.85082 |
| 0 | 8.81036 |
| 0 | 8.59531 |
| 0 | 8.54944 |
| 0 | 8.4706  |
| 0 | 8.45881 |
| 0 | 8.44333 |
| 0 | 8.43416 |
| 0 | 8.42352 |
| 0 | 8.40765 |
| 0 | 8.40325 |
| 0 | 8.39537 |
| 0 | 8.38999 |
| 0 | 8.37252 |
| 0 | 8.37252 |
| 0 | 8.37016 |
| 0 | 8.36231 |
| 0 | 8.3399  |
| 0 | 8.32472 |

|   |         |
|---|---------|
| 0 | 8.306   |
| 0 | 8.29062 |
| 0 | 8.29009 |
| 0 | 8.26645 |
| 0 | 8.19278 |
| 0 | 8.18598 |
| 0 | 8.16832 |
| 0 | 8.16327 |
| 0 | 8.15284 |
| 0 | 8.13864 |
| 0 | 8.13734 |
| 0 | 8.13734 |
| 0 | 8.13094 |
| 0 | 8.12811 |
| 0 | 8.12535 |
| 0 | 8.11509 |
| 0 | 8.11348 |
| 0 | 8.10309 |
| 0 | 8.10119 |
| 0 | 8.09734 |
| 0 | 8.08056 |
| 0 | 8.05437 |
| 0 | 8.05184 |
| 0 | 8.05184 |
| 0 | 8.04888 |
| 0 | 8.04697 |
| 0 | 8.04592 |
| 0 | 8.03995 |
| 0 | 8.03265 |
| 0 | 8.02477 |
| 0 | 8.024   |
| 0 | 8.02269 |
| 0 | 8.0198  |
| 0 | 8.01943 |
| 0 | 8.01429 |
| 0 | 8.01242 |
| 0 | 8.007   |
| 0 | 8.00245 |
| 0 | 8.00027 |
| 0 | 7.9934  |
| 0 | 7.97568 |
| 0 | 7.92886 |
| 0 | 7.92183 |
| 0 | 7.91998 |
| 0 | 7.90717 |
| 0 | 7.82099 |
| 0 | 7.79573 |

|   |         |
|---|---------|
| 0 | 7.77218 |
| 0 | 7.72266 |
| 0 | 7.70204 |
| 0 | 7.70183 |
| 0 | 7.69032 |
| 0 | 7.66888 |
| 0 | 7.66825 |
| 0 | 7.65585 |
| 0 | 7.63702 |
| 0 | 7.6285  |
| 0 | 7.61366 |
| 0 | 7.59761 |
| 0 | 7.5652  |
| 0 | 7.54663 |
| 0 | 7.53774 |
| 0 | 7.52099 |
| 0 | 7.48519 |
| 0 | 7.46589 |
| 0 | 7.46416 |
| 0 | 7.44769 |
| 0 | 7.43471 |
| 0 | 7.43093 |
| 0 | 7.42681 |
| 0 | 7.42681 |
| 0 | 7.41744 |
| 0 | 7.41667 |
| 0 | 7.4007  |
| 0 | 7.37916 |
| 0 | 7.37683 |
| 0 | 7.3743  |
| 0 | 7.36059 |
| 0 | 7.35909 |
| 0 | 7.35846 |
| 0 | 7.34787 |
| 0 | 7.34739 |
| 0 | 7.33957 |
| 0 | 7.33647 |
| 0 | 7.33246 |
| 0 | 7.3233  |
| 0 | 7.31846 |
| 0 | 7.31292 |
| 0 | 7.3071  |
| 0 | 7.29716 |
| 0 | 7.2889  |
| 0 | 7.28656 |
| 0 | 7.28647 |
| 0 | 7.27984 |

|   |         |
|---|---------|
| 0 | 7.27819 |
| 0 | 7.27664 |
| 0 | 7.27549 |
| 0 | 7.27451 |
| 0 | 7.26989 |
| 0 | 7.26915 |
| 0 | 7.26915 |
| 0 | 7.26739 |
| 0 | 7.26299 |
| 0 | 7.25799 |
| 0 | 7.25728 |
| 0 | 7.25173 |
| 0 | 7.24679 |
| 0 | 7.24342 |
| 0 | 7.24308 |
| 0 | 7.23478 |
| 0 | 7.22793 |
| 0 | 7.22341 |
| 0 | 7.21583 |
| 0 | 7.21246 |
| 0 | 7.20868 |
| 0 | 7.20458 |
| 0 | 7.19183 |
| 0 | 7.18965 |
| 0 | 7.18826 |
| 0 | 7.18826 |
| 0 | 7.17964 |
| 0 | 7.17195 |
| 0 | 7.16126 |
| 0 | 7.15988 |
| 0 | 7.15453 |
| 0 | 7.15405 |
| 0 | 7.15345 |
| 0 | 7.15172 |
| 0 | 7.14998 |
| 0 | 7.14957 |
| 0 | 7.14522 |
| 0 | 7.13831 |
| 0 | 7.13573 |
| 0 | 7.13538 |
| 0 | 7.13538 |
| 0 | 7.13441 |
| 0 | 7.13263 |
| 0 | 7.12157 |
| 0 | 7.12107 |
| 0 | 7.11509 |
| 0 | 7.1139  |

|          |         |
|----------|---------|
| 0        | 7.10291 |
| 0        | 7.09676 |
| 0        | 7.08693 |
| 0        | 7.08322 |
| 0        | 7.07973 |
| 0        | 7.07898 |
| 0        | 7.07631 |
| 0        | 7.07337 |
| 0        | 7.07245 |
| 0        | 7.07027 |
| 0        | 7.06731 |
| 0        | 7.06496 |
| 0        | 7.06441 |
| 0        | 7.05022 |
| 0        | 7.04878 |
| 0        | 7.04563 |
| 0        | 7.04556 |
| 0        | 7.04448 |
| 0        | 7.04293 |
| 0        | 7.04203 |
| 0        | 7.03851 |
| 0        | 7.03803 |
| 0        | 7.03139 |
| 0        | 7.03068 |
| 0        | 7.03062 |
| 0        | 7.01507 |
| 0        | 7.0142  |
| 0        | 7.01328 |
| 0        | 7.0089  |
| 0.590909 | 7.00804 |
| 0        | 7.00755 |
| 0        | 7.00712 |
| 0        | 7.00698 |
| 0        | 7.00427 |
| 0        | 7.00201 |
| 0        | 7.00074 |
| 0        | 7.00027 |
| 0        | 6.9503  |
| 0        | 6.93336 |
| 0        | 6.91991 |
| 0        | 6.91902 |
| 0        | 6.9063  |
| 0        | 6.90064 |
| 0        | 6.88917 |
| 0        | 6.88667 |
| 0        | 6.88419 |
| 0        | 6.87685 |

|   |         |
|---|---------|
| 0 | 6.8743  |
| 0 | 6.87114 |
| 0 | 6.85535 |
| 0 | 6.85414 |
| 0 | 6.84286 |
| 0 | 6.82514 |
| 0 | 6.81191 |
| 0 | 6.80958 |
| 0 | 6.80706 |
| 0 | 6.80181 |
| 0 | 6.79724 |
| 0 | 6.77156 |
| 0 | 6.76519 |
| 0 | 6.75972 |
| 0 | 6.75035 |
| 0 | 6.7498  |
| 0 | 6.74096 |
| 0 | 6.73055 |
| 0 | 6.7221  |
| 0 | 6.71841 |
| 0 | 6.71832 |
| 0 | 6.71712 |
| 0 | 6.71445 |
| 0 | 6.71356 |
| 0 | 6.70973 |
| 0 | 6.70783 |
| 0 | 6.70639 |
| 0 | 6.68922 |
| 0 | 6.6848  |
| 0 | 6.68415 |
| 0 | 6.68117 |
| 0 | 6.68117 |
| 0 | 6.67877 |
| 0 | 6.67254 |
| 0 | 6.65897 |
| 0 | 6.65775 |
| 0 | 6.6441  |
| 0 | 6.64373 |
| 0 | 6.62323 |
| 0 | 6.61823 |
| 0 | 6.6099  |
| 0 | 6.59771 |
| 0 | 6.59575 |
| 0 | 6.59573 |
| 0 | 6.59141 |
| 0 | 6.58077 |
| 0 | 6.58077 |



|      |         |
|------|---------|
| 0    | 6.57847 |
| 0    | 6.57713 |
| 0    | 6.57141 |
| 0    | 6.5703  |
| 0    | 6.56974 |
| 0    | 6.56974 |
| 0    | 6.56679 |
| 0    | 6.56532 |
| 0    | 6.56177 |
| 0    | 6.56023 |
| 0    | 6.55517 |
| 0    | 6.54787 |
| 0    | 6.53755 |
| 0    | 6.53749 |
| 0    | 6.53427 |
| 0    | 6.53313 |
| 0    | 6.53071 |
| 0    | 6.52677 |
| 0    | 6.51959 |
| 0    | 6.51959 |
| 0    | 6.51933 |
| 0    | 6.51561 |
| 0    | 6.51546 |
| 0    | 6.5123  |
| 0    | 6.51014 |
| 0    | 6.50898 |
| 0    | 6.50886 |
| 0    | 6.50836 |
| 0    | 6.50715 |
| 0    | 6.50715 |
| 0    | 6.50346 |
| 0    | 6.50281 |
| 0    | 6.50072 |
| 0    | 6.49979 |
| 0    | 6.49938 |
| 0.25 | 6.49641 |
| 0    | 6.49601 |
| 0    | 6.48512 |
| 0    | 6.48473 |
| 0    | 6.48275 |
| 0    | 6.48044 |
| 0    | 6.47777 |
| 0    | 6.47429 |
| 0    | 6.46892 |
| 0    | 6.46358 |
| 0    | 6.45975 |
| 0    | 6.45413 |

|   |         |
|---|---------|
| 0 | 6.4502  |
| 0 | 6.45014 |
| 0 | 6.447   |
| 0 | 6.44682 |
| 0 | 6.44263 |
| 0 | 6.44227 |
| 0 | 6.44051 |
| 0 | 6.43844 |
| 0 | 6.4372  |
| 0 | 6.43337 |
| 0 | 6.42739 |
| 0 | 6.42511 |
| 0 | 6.41856 |
| 0 | 6.41539 |
| 0 | 6.41075 |
| 0 | 6.41028 |
| 0 | 6.40536 |
| 0 | 6.4029  |
| 0 | 6.39942 |
| 0 | 6.39225 |
| 0 | 6.38957 |
| 0 | 6.38401 |
| 0 | 6.38114 |
| 0 | 6.38108 |
| 0 | 6.37689 |
| 0 | 6.37239 |
| 0 | 6.36166 |
| 0 | 6.35979 |
| 0 | 6.35828 |
| 0 | 6.35724 |
| 0 | 6.35425 |
| 0 | 6.35378 |
| 0 | 6.35343 |
| 0 | 6.35333 |
| 0 | 6.35125 |
| 0 | 6.35116 |
| 0 | 6.34934 |
| 0 | 6.34172 |
| 0 | 6.3396  |
| 0 | 6.33338 |
| 0 | 6.33087 |
| 0 | 6.33075 |
| 0 | 6.33014 |
| 0 | 6.33013 |
| 0 | 6.32969 |
| 0 | 6.32898 |
| 0 | 6.3243  |

|   |         |
|---|---------|
| 0 | 6.32356 |
| 0 | 6.31783 |
| 0 | 6.31249 |
| 0 | 6.31182 |
| 0 | 6.31012 |
| 0 | 6.30625 |
| 0 | 6.30191 |
| 0 | 6.30098 |
| 0 | 6.30098 |
| 0 | 6.29692 |
| 0 | 6.29554 |
| 0 | 6.29549 |
| 0 | 6.29524 |
| 0 | 6.28887 |
| 0 | 6.28452 |
| 0 | 6.28262 |
| 0 | 6.28224 |
| 0 | 6.28197 |
| 0 | 6.28114 |
| 0 | 6.27741 |
| 0 | 6.27543 |
| 0 | 6.2752  |
| 0 | 6.27514 |
| 0 | 6.27476 |
| 0 | 6.27445 |
| 0 | 6.27442 |
| 0 | 6.27394 |
| 0 | 6.27286 |
| 0 | 6.27126 |
| 0 | 6.27085 |
| 0 | 6.26891 |
| 0 | 6.26642 |
| 0 | 6.26265 |
| 0 | 6.26149 |
| 0 | 6.2568  |
| 0 | 6.25583 |
| 0 | 6.25444 |
| 0 | 6.25409 |
| 0 | 6.25126 |
| 0 | 6.24434 |
| 0 | 6.24332 |
| 0 | 6.24105 |
| 0 | 6.2405  |
| 0 | 6.23825 |
| 0 | 6.22645 |
| 0 | 6.22223 |
| 0 | 6.22125 |

|   |         |
|---|---------|
| 0 | 6.21964 |
| 0 | 6.21717 |
| 0 | 6.21675 |
| 0 | 6.21405 |
| 0 | 6.20956 |
| 0 | 6.2077  |
| 0 | 6.20707 |
| 0 | 6.20631 |
| 0 | 6.20449 |
| 0 | 6.20443 |
| 0 | 6.20437 |
| 0 | 6.20318 |
| 0 | 6.20119 |
| 0 | 6.20092 |
| 0 | 6.19511 |
| 0 | 6.1947  |
| 0 | 6.19243 |
| 0 | 6.19216 |
| 0 | 6.19185 |
| 0 | 6.19152 |
| 0 | 6.19148 |
| 0 | 6.19052 |
| 0 | 6.18929 |
| 0 | 6.18843 |
| 0 | 6.18765 |
| 0 | 6.18435 |
| 0 | 6.17735 |
| 0 | 6.17406 |
| 0 | 6.17137 |
| 0 | 6.17066 |
| 0 | 6.1691  |
| 0 | 6.16888 |
| 0 | 6.16769 |
| 0 | 6.16487 |
| 0 | 6.16363 |
| 0 | 6.16307 |
| 0 | 6.16281 |
| 0 | 6.16254 |
| 0 | 6.16182 |
| 0 | 6.16167 |
| 0 | 6.15718 |
| 0 | 6.15695 |
| 0 | 6.15596 |
| 0 | 6.1552  |
| 0 | 6.15396 |
| 0 | 6.14922 |
| 0 | 6.14878 |

|   |         |
|---|---------|
| 0 | 6.14814 |
| 0 | 6.14631 |
| 0 | 6.14569 |
| 0 | 6.14553 |
| 0 | 6.14518 |
| 0 | 6.14515 |
| 0 | 6.14454 |
| 0 | 6.1422  |
| 0 | 6.14071 |
| 0 | 6.13585 |
| 0 | 6.13575 |
| 0 | 6.13146 |
| 0 | 6.12921 |
| 0 | 6.12853 |
| 0 | 6.128   |
| 0 | 6.12756 |
| 0 | 6.12702 |
| 0 | 6.12501 |
| 0 | 6.12486 |
| 0 | 6.12395 |
| 0 | 6.12069 |
| 0 | 6.11767 |
| 0 | 6.11543 |
| 0 | 6.11543 |
| 0 | 6.11511 |
| 0 | 6.11498 |
| 0 | 6.11341 |
| 0 | 6.11202 |
| 0 | 6.10963 |
| 0 | 6.10804 |
| 0 | 6.10686 |
| 0 | 6.10566 |
| 0 | 6.1044  |
| 0 | 6.10332 |
| 0 | 6.10307 |
| 0 | 6.10249 |
| 0 | 6.10168 |
| 0 | 6.10054 |
| 0 | 6.10054 |
| 0 | 6.09832 |
| 0 | 6.0969  |
| 0 | 6.09625 |
| 0 | 6.09623 |
| 0 | 6.09576 |
| 0 | 6.09366 |
| 0 | 6.09015 |
| 0 | 6.08969 |

|   |         |
|---|---------|
| 0 | 6.08942 |
| 0 | 6.08825 |
| 0 | 6.0874  |
| 0 | 6.08709 |
| 0 | 6.08656 |
| 0 | 6.0865  |
| 0 | 6.08383 |
| 0 | 6.08339 |
| 0 | 6.08234 |
| 0 | 6.08173 |
| 0 | 6.08122 |
| 0 | 6.08107 |
| 0 | 6.08079 |
| 0 | 6.08045 |
| 0 | 6.07909 |
| 0 | 6.07851 |
| 0 | 6.07848 |
| 0 | 6.07812 |
| 0 | 6.07764 |
| 0 | 6.07688 |
| 0 | 6.07669 |
| 0 | 6.07571 |
| 0 | 6.07483 |
| 0 | 6.07397 |
| 0 | 6.07288 |
| 0 | 6.0715  |
| 0 | 6.07053 |
| 0 | 6.06985 |
| 0 | 6.0698  |
| 0 | 6.06912 |
| 0 | 6.06768 |
| 0 | 6.067   |
| 0 | 6.06669 |
| 0 | 6.06647 |
| 0 | 6.0653  |
| 0 | 6.06428 |
| 0 | 6.06427 |
| 0 | 6.06244 |
| 0 | 6.06216 |
| 0 | 6.05926 |
| 0 | 6.05857 |
| 0 | 6.05755 |
| 0 | 6.05649 |
| 0 | 6.05598 |
| 0 | 6.05544 |
| 0 | 6.05424 |
| 0 | 6.05281 |

|   |         |
|---|---------|
| 0 | 6.05074 |
| 0 | 6.0501  |
| 0 | 6.04978 |
| 0 | 6.04955 |
| 0 | 6.04679 |
| 0 | 6.04555 |
| 0 | 6.03784 |
| 0 | 6.03784 |
| 0 | 6.0365  |
| 0 | 6.03632 |
| 0 | 6.0355  |
| 0 | 6.03523 |
| 0 | 6.03468 |
| 0 | 6.03386 |
| 0 | 6.03285 |
| 0 | 6.03116 |
| 0 | 6.03014 |
| 0 | 6.02995 |
| 0 | 6.02962 |
| 0 | 6.02742 |
| 0 | 6.02731 |
| 0 | 6.02717 |
| 0 | 6.02637 |
| 0 | 6.02429 |
| 0 | 6.02387 |
| 0 | 6.02337 |
| 0 | 6.02317 |
| 0 | 6.02303 |
| 0 | 6.02283 |
| 0 | 6.02217 |
| 0 | 6.02021 |
| 0 | 6.01872 |
| 0 | 6.01496 |
| 0 | 6.01227 |
| 0 | 6.0104  |
| 0 | 6.00924 |
| 0 | 6.00788 |
| 0 | 6.00783 |
| 0 | 6.00686 |
| 0 | 6.00629 |
| 0 | 6.00428 |
| 0 | 6.00179 |
| 0 | 6.00069 |
| 0 | 6.00062 |
| 0 | 6.00062 |
| 0 | 5.99617 |
| 0 | 5.98169 |

|   |         |
|---|---------|
| 0 | 5.98041 |
| 0 | 5.97385 |
| 0 | 5.97316 |
| 0 | 5.95186 |
| 0 | 5.94644 |
| 0 | 5.94413 |
| 0 | 5.94308 |
| 0 | 5.93758 |
| 0 | 5.93723 |
| 0 | 5.93472 |
| 0 | 5.92894 |
| 0 | 5.92787 |
| 0 | 5.92529 |
| 0 | 5.92512 |
| 0 | 5.92391 |
| 0 | 5.91969 |
| 0 | 5.91035 |
| 0 | 5.90621 |
| 0 | 5.89962 |
| 0 | 5.89847 |
| 0 | 5.8794  |
| 0 | 5.8791  |
| 0 | 5.86041 |
| 0 | 5.86041 |
| 0 | 5.86014 |
| 0 | 5.85505 |
| 0 | 5.85232 |
| 0 | 5.84806 |
| 0 | 5.8462  |
| 0 | 5.83641 |
| 0 | 5.83496 |
| 0 | 5.83469 |
| 0 | 5.83392 |
| 0 | 5.83174 |
| 0 | 5.82677 |
| 0 | 5.81259 |
| 0 | 5.80957 |
| 0 | 5.80832 |
| 0 | 5.80824 |
| 0 | 5.80778 |
| 0 | 5.80678 |
| 0 | 5.80596 |
| 0 | 5.80526 |
| 0 | 5.8041  |
| 0 | 5.79968 |
| 0 | 5.79583 |
| 0 | 5.79282 |



|   |         |
|---|---------|
| 0 | 5.79089 |
| 0 | 5.78798 |
| 0 | 5.78724 |
| 0 | 5.78502 |
| 0 | 5.78438 |
| 0 | 5.78257 |
| 0 | 5.77699 |
| 0 | 5.77276 |
| 0 | 5.77163 |
| 0 | 5.7633  |
| 0 | 5.75863 |
| 0 | 5.75564 |
| 0 | 5.7536  |
| 0 | 5.7532  |
| 0 | 5.74595 |
| 0 | 5.74347 |
| 0 | 5.73142 |
| 0 | 5.73048 |
| 0 | 5.72917 |
| 0 | 5.72389 |
| 0 | 5.71775 |
| 0 | 5.71633 |
| 0 | 5.71425 |
| 0 | 5.71378 |
| 0 | 5.71078 |
| 0 | 5.7107  |
| 0 | 5.70912 |
| 0 | 5.70783 |
| 0 | 5.70276 |
| 0 | 5.70117 |
| 0 | 5.70048 |
| 0 | 5.69916 |
| 0 | 5.69605 |
| 0 | 5.68855 |
| 0 | 5.68724 |
| 0 | 5.68622 |
| 0 | 5.68502 |
| 0 | 5.6849  |
| 0 | 5.6849  |
| 0 | 5.68484 |
| 0 | 5.67606 |
| 0 | 5.66633 |
| 0 | 5.66189 |
| 0 | 5.65818 |
| 0 | 5.65739 |
| 0 | 5.64875 |
| 0 | 5.64818 |

|   |         |
|---|---------|
| 0 | 5.6475  |
| 0 | 5.64596 |
| 0 | 5.63851 |
| 0 | 5.6367  |
| 0 | 5.63572 |
| 0 | 5.63391 |
| 0 | 5.63269 |
| 0 | 5.62963 |
| 0 | 5.62891 |
| 0 | 5.62732 |
| 0 | 5.62731 |
| 0 | 5.62585 |
| 0 | 5.62214 |
| 0 | 5.62006 |
| 0 | 5.6199  |
| 0 | 5.61952 |
| 0 | 5.61372 |
| 0 | 5.61335 |
| 0 | 5.61206 |
| 0 | 5.60388 |
| 0 | 5.60381 |
| 0 | 5.60381 |
| 0 | 5.602   |
| 0 | 5.60134 |
| 0 | 5.60096 |
| 0 | 5.60042 |
| 0 | 5.59854 |
| 0 | 5.5971  |
| 0 | 5.59705 |
| 0 | 5.59321 |
| 0 | 5.59125 |
| 0 | 5.5901  |
| 0 | 5.58927 |
| 0 | 5.58909 |
| 0 | 5.58872 |
| 0 | 5.58847 |
| 0 | 5.58817 |
| 0 | 5.58813 |
| 0 | 5.58705 |
| 0 | 5.58345 |
| 0 | 5.5828  |
| 0 | 5.58276 |
| 0 | 5.57893 |
| 0 | 5.57872 |
| 0 | 5.57685 |
| 0 | 5.57275 |
| 0 | 5.56872 |

|   |         |
|---|---------|
| 0 | 5.56765 |
| 0 | 5.5674  |
| 0 | 5.56507 |
| 0 | 5.5644  |
| 0 | 5.56173 |
| 0 | 5.55694 |
| 0 | 5.55674 |
| 0 | 5.55357 |
| 0 | 5.55277 |
| 0 | 5.55268 |
| 0 | 5.548   |
| 0 | 5.54759 |
| 0 | 5.5461  |
| 0 | 5.54525 |
| 0 | 5.54447 |
| 0 | 5.54447 |
| 0 | 5.54443 |
| 0 | 5.54375 |
| 0 | 5.54232 |
| 0 | 5.54127 |
| 0 | 5.54073 |
| 0 | 5.54009 |
| 0 | 5.5357  |
| 0 | 5.5353  |
| 0 | 5.53367 |
| 0 | 5.52888 |
| 0 | 5.52886 |
| 0 | 5.52622 |
| 0 | 5.52376 |
| 0 | 5.52084 |
| 0 | 5.52062 |
| 0 | 5.5149  |
| 0 | 5.5143  |
| 0 | 5.51333 |
| 0 | 5.51107 |
| 0 | 5.50582 |
| 0 | 5.50559 |
| 0 | 5.50237 |
| 0 | 5.50179 |
| 0 | 5.5016  |
| 0 | 5.50135 |
| 0 | 5.49864 |
| 0 | 5.49859 |
| 0 | 5.49814 |
| 0 | 5.49575 |
| 0 | 5.49309 |
| 0 | 5.4913  |

|   |         |
|---|---------|
| 0 | 5.49041 |
| 0 | 5.49032 |
| 0 | 5.48929 |
| 0 | 5.48639 |
| 0 | 5.48554 |
| 0 | 5.48552 |
| 0 | 5.4855  |
| 0 | 5.4855  |
| 0 | 5.48285 |
| 0 | 5.48229 |
| 0 | 5.48125 |
| 0 | 5.48069 |
| 0 | 5.47802 |
| 0 | 5.47785 |
| 0 | 5.47666 |
| 0 | 5.47447 |
| 0 | 5.47313 |
| 0 | 5.47309 |
| 0 | 5.47291 |
| 0 | 5.47282 |
| 0 | 5.4724  |
| 0 | 5.4723  |
| 0 | 5.47221 |
| 0 | 5.47154 |
| 0 | 5.47088 |
| 0 | 5.46921 |
| 0 | 5.46836 |
| 0 | 5.46471 |
| 0 | 5.46368 |
| 0 | 5.462   |
| 0 | 5.46104 |
| 0 | 5.45665 |
| 0 | 5.45623 |
| 0 | 5.45566 |
| 0 | 5.45469 |
| 0 | 5.45237 |
| 0 | 5.45049 |
| 0 | 5.44976 |
| 0 | 5.44887 |
| 0 | 5.44828 |
| 0 | 5.4482  |
| 0 | 5.44754 |
| 0 | 5.44615 |
| 0 | 5.4453  |
| 0 | 5.44492 |
| 0 | 5.44488 |
| 0 | 5.44481 |

|   |         |
|---|---------|
| 0 | 5.44464 |
| 0 | 5.44366 |
| 0 | 5.44301 |
| 0 | 5.44286 |
| 0 | 5.44281 |
| 0 | 5.44281 |
| 0 | 5.44272 |
| 0 | 5.43851 |
| 0 | 5.43742 |
| 0 | 5.43603 |
| 0 | 5.43538 |
| 0 | 5.43536 |
| 0 | 5.43462 |
| 0 | 5.43408 |
| 0 | 5.43353 |
| 0 | 5.4333  |
| 0 | 5.43328 |
| 0 | 5.43301 |
| 0 | 5.43181 |
| 0 | 5.43155 |
| 0 | 5.43143 |
| 0 | 5.43121 |
| 0 | 5.42997 |
| 0 | 5.4293  |
| 0 | 5.42868 |
| 0 | 5.42866 |
| 0 | 5.42737 |
| 0 | 5.42692 |
| 0 | 5.42605 |
| 0 | 5.4252  |
| 0 | 5.42443 |
| 0 | 5.42391 |
| 0 | 5.42374 |
| 0 | 5.42309 |
| 0 | 5.42295 |
| 0 | 5.4229  |
| 0 | 5.42285 |
| 0 | 5.42285 |
| 0 | 5.42148 |
| 0 | 5.42055 |
| 0 | 5.41985 |
| 0 | 5.41963 |
| 0 | 5.41767 |
| 0 | 5.41765 |
| 0 | 5.41703 |
| 0 | 5.41658 |
| 0 | 5.41552 |

|   |         |
|---|---------|
| 0 | 5.41363 |
| 0 | 5.41055 |
| 0 | 5.40832 |
| 0 | 5.40741 |
| 0 | 5.40738 |
| 0 | 5.40703 |
| 0 | 5.40698 |
| 0 | 5.40599 |
| 0 | 5.40554 |
| 0 | 5.40493 |
| 0 | 5.40317 |
| 0 | 5.40282 |
| 0 | 5.39816 |
| 0 | 5.39806 |
| 0 | 5.398   |
| 0 | 5.39783 |
| 0 | 5.39626 |
| 0 | 5.39588 |
| 0 | 5.39571 |
| 0 | 5.39539 |
| 0 | 5.39527 |
| 0 | 5.39508 |
| 0 | 5.39503 |
| 0 | 5.39239 |
| 0 | 5.39171 |
| 0 | 5.39138 |
| 0 | 5.38925 |
| 0 | 5.38842 |
| 0 | 5.38721 |
| 0 | 5.38485 |
| 0 | 5.38459 |
| 0 | 5.38364 |
| 0 | 5.38235 |
| 0 | 5.38197 |
| 0 | 5.38136 |
| 0 | 5.38136 |
| 0 | 5.38071 |
| 0 | 5.37994 |
| 0 | 5.37909 |
| 0 | 5.37878 |
| 0 | 5.37848 |
| 0 | 5.37836 |
| 0 | 5.37796 |
| 0 | 5.37654 |
| 0 | 5.37575 |
| 0 | 5.37531 |
| 0 | 5.37481 |

|   |         |
|---|---------|
| 0 | 5.37479 |
| 0 | 5.37372 |
| 0 | 5.37244 |
| 0 | 5.37244 |
| 0 | 5.37108 |
| 0 | 5.36978 |
| 0 | 5.36905 |
| 0 | 5.36741 |
| 0 | 5.36716 |
| 0 | 5.36692 |
| 0 | 5.36658 |
| 0 | 5.36611 |
| 0 | 5.36611 |
| 0 | 5.36588 |
| 0 | 5.36471 |
| 0 | 5.36454 |
| 0 | 5.36424 |
| 0 | 5.3629  |
| 0 | 5.36205 |
| 0 | 5.36102 |
| 0 | 5.36095 |
| 0 | 5.35996 |
| 0 | 5.35939 |
| 0 | 5.35849 |
| 0 | 5.35813 |
| 0 | 5.35766 |
| 0 | 5.35766 |
| 0 | 5.35562 |
| 0 | 5.35541 |
| 0 | 5.35403 |
| 0 | 5.35285 |
| 0 | 5.35243 |
| 0 | 5.35233 |
| 0 | 5.35063 |
| 0 | 5.3505  |
| 0 | 5.35008 |
| 0 | 5.34958 |
| 0 | 5.3493  |
| 0 | 5.34833 |
| 0 | 5.34749 |
| 0 | 5.34671 |
| 0 | 5.34619 |
| 0 | 5.34457 |
| 0 | 5.34433 |
| 0 | 5.34368 |
| 0 | 5.34298 |
| 0 | 5.3425  |

|   |         |
|---|---------|
| 0 | 5.34185 |
| 0 | 5.34185 |
| 0 | 5.34093 |
| 0 | 5.3399  |
| 0 | 5.33987 |
| 0 | 5.33986 |
| 0 | 5.33739 |
| 0 | 5.33525 |
| 0 | 5.33452 |
| 0 | 5.33363 |
| 0 | 5.33251 |
| 0 | 5.33179 |
| 0 | 5.3317  |
| 0 | 5.33101 |
| 0 | 5.33088 |
| 0 | 5.33073 |
| 0 | 5.32952 |
| 0 | 5.32948 |
| 0 | 5.32932 |
| 0 | 5.32846 |
| 0 | 5.32823 |
| 0 | 5.32809 |
| 0 | 5.32809 |
| 0 | 5.3277  |
| 0 | 5.32655 |
| 0 | 5.3264  |
| 0 | 5.32569 |
| 0 | 5.32534 |
| 0 | 5.32488 |
| 0 | 5.32483 |
| 0 | 5.32483 |
| 0 | 5.32439 |
| 0 | 5.32357 |
| 0 | 5.32285 |
| 0 | 5.32233 |
| 0 | 5.32151 |
| 0 | 5.32029 |
| 0 | 5.3198  |
| 0 | 5.31786 |
| 0 | 5.31775 |
| 0 | 5.31757 |
| 0 | 5.31737 |
| 0 | 5.31689 |
| 0 | 5.3158  |
| 0 | 5.31575 |
| 0 | 5.31564 |
| 0 | 5.31508 |



|   |         |
|---|---------|
| 0 | 5.31503 |
| 0 | 5.315   |
| 0 | 5.3139  |
| 0 | 5.31331 |
| 0 | 5.31318 |
| 0 | 5.31299 |
| 0 | 5.31226 |
| 0 | 5.31123 |
| 0 | 5.311   |
| 0 | 5.30949 |
| 0 | 5.30947 |
| 0 | 5.30941 |
| 0 | 5.30913 |
| 0 | 5.30907 |
| 0 | 5.30769 |
| 0 | 5.30748 |
| 0 | 5.30726 |
| 0 | 5.30642 |
| 0 | 5.30641 |
| 0 | 5.30551 |
| 0 | 5.30497 |
| 0 | 5.30494 |
| 0 | 5.30383 |
| 0 | 5.30362 |
| 0 | 5.30114 |
| 0 | 5.30055 |
| 0 | 5.30055 |
| 0 | 5.29847 |
| 0 | 5.29829 |
| 0 | 5.29742 |
| 0 | 5.29602 |
| 0 | 5.29594 |
| 0 | 5.29589 |
| 0 | 5.29571 |
| 0 | 5.29548 |
| 0 | 5.29536 |
| 0 | 5.29338 |
| 0 | 5.29149 |
| 0 | 5.29133 |
| 0 | 5.29119 |
| 0 | 5.29119 |
| 0 | 5.29048 |
| 0 | 5.28953 |
| 0 | 5.28904 |
| 0 | 5.28819 |
| 0 | 5.2881  |
| 0 | 5.28801 |

|   |         |
|---|---------|
| 0 | 5.28728 |
| 0 | 5.28712 |
| 0 | 5.28678 |
| 0 | 5.28649 |
| 0 | 5.28542 |
| 0 | 5.28503 |
| 0 | 5.28484 |
| 0 | 5.28467 |
| 0 | 5.28404 |
| 0 | 5.28318 |
| 0 | 5.28309 |
| 0 | 5.28147 |
| 0 | 5.28122 |
| 0 | 5.28077 |
| 0 | 5.28065 |
| 0 | 5.28063 |
| 0 | 5.28008 |
| 0 | 5.27979 |
| 0 | 5.27916 |
| 0 | 5.27859 |
| 0 | 5.27804 |
| 0 | 5.27753 |
| 0 | 5.27749 |
| 0 | 5.27749 |
| 0 | 5.27531 |
| 0 | 5.27485 |
| 0 | 5.27484 |
| 0 | 5.27449 |
| 0 | 5.2733  |
| 0 | 5.26977 |
| 0 | 5.26858 |
| 0 | 5.26845 |
| 0 | 5.26845 |
| 0 | 5.26838 |
| 0 | 5.26731 |
| 0 | 5.26719 |
| 0 | 5.26687 |
| 0 | 5.26647 |
| 0 | 5.26585 |
| 0 | 5.26557 |
| 0 | 5.26541 |
| 0 | 5.26445 |
| 0 | 5.26425 |
| 0 | 5.26318 |
| 0 | 5.26176 |
| 0 | 5.26167 |
| 0 | 5.26132 |

|   |         |
|---|---------|
| 0 | 5.2597  |
| 0 | 5.25933 |
| 0 | 5.25902 |
| 0 | 5.25889 |
| 0 | 5.25865 |
| 0 | 5.25751 |
| 0 | 5.25743 |
| 0 | 5.25698 |
| 0 | 5.2569  |
| 0 | 5.25643 |
| 0 | 5.25633 |
| 0 | 5.25629 |
| 0 | 5.25582 |
| 0 | 5.25378 |
| 0 | 5.25228 |
| 0 | 5.2515  |
| 0 | 5.25141 |
| 0 | 5.24986 |
| 0 | 5.24986 |
| 0 | 5.24981 |
| 0 | 5.24912 |
| 0 | 5.24874 |
| 0 | 5.24861 |
| 0 | 5.24775 |
| 0 | 5.24737 |
| 0 | 5.24612 |
| 0 | 5.24595 |
| 0 | 5.24543 |
| 0 | 5.24527 |
| 0 | 5.24511 |
| 0 | 5.24453 |
| 0 | 5.24446 |
| 0 | 5.24362 |
| 0 | 5.24362 |
| 0 | 5.24307 |
| 0 | 5.24253 |
| 0 | 5.24213 |
| 0 | 5.24151 |
| 0 | 5.24077 |
| 0 | 5.24056 |
| 0 | 5.23979 |
| 0 | 5.23978 |
| 0 | 5.23851 |
| 0 | 5.23739 |
| 0 | 5.2368  |
| 0 | 5.23637 |
| 0 | 5.23541 |

|   |         |
|---|---------|
| 0 | 5.23404 |
| 0 | 5.23321 |
| 0 | 5.23298 |
| 0 | 5.23203 |
| 0 | 5.23184 |
| 0 | 5.23156 |
| 0 | 5.23152 |
| 0 | 5.23109 |
| 0 | 5.23055 |
| 0 | 5.23031 |
| 0 | 5.23024 |
| 0 | 5.22927 |
| 0 | 5.2289  |
| 0 | 5.22856 |
| 0 | 5.22806 |
| 0 | 5.22792 |
| 0 | 5.2272  |
| 0 | 5.22695 |
| 0 | 5.22685 |
| 0 | 5.22659 |
| 0 | 5.22627 |
| 0 | 5.22603 |
| 0 | 5.22602 |
| 0 | 5.22587 |
| 0 | 5.22553 |
| 0 | 5.22495 |
| 0 | 5.22458 |
| 0 | 5.22457 |
| 0 | 5.22425 |
| 0 | 5.2241  |
| 0 | 5.22396 |
| 0 | 5.22336 |
| 0 | 5.22195 |
| 0 | 5.22109 |
| 0 | 5.22077 |
| 0 | 5.22005 |
| 0 | 5.22    |
| 0 | 5.21989 |
| 0 | 5.21903 |
| 0 | 5.21824 |
| 0 | 5.21732 |
| 0 | 5.21673 |
| 0 | 5.21541 |
| 0 | 5.21514 |
| 0 | 5.21486 |
| 0 | 5.21456 |
| 0 | 5.21384 |

|   |         |
|---|---------|
| 0 | 5.21336 |
| 0 | 5.21327 |
| 0 | 5.21324 |
| 0 | 5.21314 |
| 0 | 5.21265 |
| 0 | 5.21222 |
| 0 | 5.21091 |
| 0 | 5.21034 |
| 0 | 5.21012 |
| 0 | 5.21005 |
| 0 | 5.21    |
| 0 | 5.20968 |
| 0 | 5.20931 |
| 0 | 5.20893 |
| 0 | 5.20863 |
| 0 | 5.2084  |
| 0 | 5.20838 |
| 0 | 5.2083  |
| 0 | 5.20736 |
| 0 | 5.20688 |
| 0 | 5.20664 |
| 0 | 5.20553 |
| 0 | 5.20513 |
| 0 | 5.20484 |
| 0 | 5.20483 |
| 0 | 5.20468 |
| 0 | 5.20465 |
| 0 | 5.20263 |
| 0 | 5.2012  |
| 0 | 5.20063 |
| 0 | 5.20038 |
| 0 | 5.20033 |
| 0 | 5.19884 |
| 0 | 5.1984  |
| 0 | 5.1982  |
| 0 | 5.1961  |
| 0 | 5.19541 |
| 0 | 5.19517 |
| 0 | 5.19501 |
| 0 | 5.19495 |
| 0 | 5.19445 |
| 0 | 5.19445 |
| 0 | 5.19436 |
| 0 | 5.19374 |
| 0 | 5.19284 |
| 0 | 5.19231 |
| 0 | 5.19126 |

|   |         |
|---|---------|
| 0 | 5.19126 |
| 0 | 5.19089 |
| 0 | 5.19089 |
| 0 | 5.19001 |
| 0 | 5.18982 |
| 0 | 5.18982 |
| 0 | 5.18947 |
| 0 | 5.18915 |
| 0 | 5.18893 |
| 0 | 5.18861 |
| 0 | 5.18843 |
| 0 | 5.18824 |
| 0 | 5.18777 |
| 0 | 5.1877  |
| 0 | 5.18765 |
| 0 | 5.18761 |
| 0 | 5.18731 |
| 0 | 5.18687 |
| 0 | 5.18684 |
| 0 | 5.18668 |
| 0 | 5.18578 |
| 0 | 5.18567 |
| 0 | 5.18499 |
| 0 | 5.18431 |
| 0 | 5.18431 |
| 0 | 5.1838  |
| 0 | 5.18365 |
| 0 | 5.18357 |
| 0 | 5.18288 |
| 0 | 5.18242 |
| 0 | 5.18174 |
| 0 | 5.18066 |
| 0 | 5.1804  |
| 0 | 5.17936 |
| 0 | 5.17858 |
| 0 | 5.17822 |
| 0 | 5.17752 |
| 0 | 5.1773  |
| 0 | 5.17721 |
| 0 | 5.17553 |
| 0 | 5.17533 |
| 0 | 5.17525 |
| 0 | 5.17483 |
| 0 | 5.17393 |
| 0 | 5.17385 |
| 0 | 5.17375 |
| 0 | 5.17374 |

|   |         |
|---|---------|
| 0 | 5.17216 |
| 0 | 5.17214 |
| 0 | 5.17195 |
| 0 | 5.17121 |
| 0 | 5.17018 |
| 0 | 5.16893 |
| 0 | 5.1686  |
| 0 | 5.16799 |
| 0 | 5.16777 |
| 0 | 5.16777 |
| 0 | 5.16709 |
| 0 | 5.16638 |
| 0 | 5.16638 |
| 0 | 5.16537 |
| 0 | 5.16516 |
| 0 | 5.16476 |
| 0 | 5.16476 |
| 0 | 5.16328 |
| 0 | 5.16279 |
| 0 | 5.16279 |
| 0 | 5.16276 |
| 0 | 5.16224 |
| 0 | 5.16207 |
| 0 | 5.16152 |
| 0 | 5.16152 |
| 0 | 5.16142 |
| 0 | 5.16097 |
| 0 | 5.16086 |
| 0 | 5.16041 |
| 0 | 5.16025 |
| 0 | 5.15978 |
| 0 | 5.15978 |
| 0 | 5.15972 |
| 0 | 5.15971 |
| 0 | 5.15959 |
| 0 | 5.15943 |
| 0 | 5.159   |
| 0 | 5.15827 |
| 0 | 5.15779 |
| 0 | 5.15746 |
| 0 | 5.15736 |
| 0 | 5.15683 |
| 0 | 5.15647 |
| 0 | 5.15646 |
| 0 | 5.15608 |
| 0 | 5.15471 |
| 0 | 5.1541  |

|   |         |
|---|---------|
| 0 | 5.15361 |
| 0 | 5.15301 |
| 0 | 5.15239 |
| 0 | 5.15113 |
| 0 | 5.15104 |
| 0 | 5.15088 |
| 0 | 5.15072 |
| 0 | 5.15034 |
| 0 | 5.14994 |
| 0 | 5.148   |
| 0 | 5.14783 |
| 0 | 5.14769 |
| 0 | 5.14731 |
| 0 | 5.1471  |
| 0 | 5.14708 |
| 0 | 5.14634 |
| 0 | 5.14534 |
| 0 | 5.14497 |
| 0 | 5.14455 |
| 0 | 5.1435  |
| 0 | 5.14261 |
| 0 | 5.14166 |
| 0 | 5.14146 |
| 0 | 5.14134 |
| 0 | 5.14121 |
| 0 | 5.14107 |
| 0 | 5.13982 |
| 0 | 5.13938 |
| 0 | 5.13913 |
| 0 | 5.13848 |
| 0 | 5.13822 |
| 0 | 5.13744 |
| 0 | 5.13725 |
| 0 | 5.13721 |
| 0 | 5.13656 |
| 0 | 5.13648 |



**Gene List G4+/- H3K14ac Control Diet**

| chromosome | feature start | feature end | feature      | chromosome | region start | region end |
|------------|---------------|-------------|--------------|------------|--------------|------------|
| 1          | 195060346     | 195077006   | NM_144817    | chr1       | 195071429    | 195072150  |
| 1          | 194899680     | 194908210   | NM_153137    | chr1       | 194903395    | 194903988  |
| 1          | 194828426     | 194836975   | NM_145415    | chr1       | 194834734    | 194835295  |
| 1          | 194469246     | 194477937   | NM_144881    | chr1       | 194476315    | 194476918  |
| 1          | 193885596     | 193894142   | NM_010600    | chr1       | 193886283    | 193886858  |
| 1          | 192875592     | 192889955   | NM_007498    | chr1       | 192888145    | 192888795  |
| 1          | 192875592     | 192889955   | NM_007498    | chr1       | 192880711    | 192881497  |
| 1          | 192793029     | 192801528   | NM_030060    | chr1       | 192800223    | 192801246  |
| 1          | 192623160     | 192631659   | NM_021421    | chr1       | 192627175    | 192627775  |
| 1          | 190976123     | 190984622   | BC056167     | chr1       | 190978968    | 190979674  |
| 1          | 188655296     | 188670703   | NM_033077    | chr1       | 188657856    | 188658562  |
| 1          | 188403189     | 188412777   | NM_009367    | chr1       | 188409085    | 188409691  |
| 1          | 188403189     | 188412777   | NM_009367    | chr1       | 188407703    | 188408377  |
| 1          | 187815599     | 187824098   | NM_146106    | chr1       | 187820450    | 187820927  |
| 1          | 184595571     | 184604080   | NM_144796    | chr1       | 184598988    | 184599598  |
| 1          | 182317535     | 182326143   | BC120654     | chr1       | 182324463    | 182325383  |
| 1          | 182164726     | 182173225   | NM_199472    | chr1       | 182172530    | 182173182  |
| 2          | 180936648     | 180945147   | BC016112     | chr2       | 180940061    | 180941139  |
| 2          | 180395837     | 180404336   | BC033602     | chr2       | 180397956    | 180398646  |
| 2          | 180395837     | 180404336   | BC033602     | chr2       | 180396963    | 180397647  |
| 1          | 179273082     | 179285993   | NM_013915    | chr1       | 179282484    | 179283102  |
| 1          | 176755976     | 176764494   | NM_011825    | chr1       | 176762047    | 176762709  |
| 1          | 175982156     | 175997949   | NM_146305    | chr1       | 175995646    | 175996366  |
| 1          | 175982156     | 175997949   | NM_146305    | chr1       | 175986165    | 175987486  |
| 1          | 175967421     | 175975920   | NM_146721    | chr1       | 175973306    | 175973924  |
| 1          | 175930135     | 175938634   | NM_001011844 | chr1       | 175936539    | 175937173  |
| 1          | 175919717     | 175928216   | NM_146722    | chr1       | 175921351    | 175922220  |
| 1          | 175872608     | 175889549   | NM_146717    | chr1       | 175885028    | 175885799  |
| 1          | 175872608     | 175889549   | NM_146717    | chr1       | 175882131    | 175882745  |
| 1          | 175872608     | 175889549   | NM_146717    | chr1       | 175880597    | 175881588  |
| 1          | 175872608     | 175889549   | NM_146717    | chr1       | 175877738    | 175878343  |
| 1          | 175872608     | 175889549   | NM_146717    | chr1       | 175876696    | 175877658  |
| 1          | 175292822     | 175301321   | NM_001013779 | chr1       | 175296689    | 175297321  |
| 1          | 175179229     | 175187728   | BC029659     | chr1       | 175185387    | 175186218  |
| 1          | 175179229     | 175187728   | BC029659     | chr1       | 175181889    | 175183321  |
| 1          | 175167620     | 175176348   | NM_010045    | chr1       | 175174250    | 175175026  |
| 2          | 174847297     | 174855796   | U62393       | chr2       | 174854030    | 174854635  |
| 1          | 174787443     | 174795942   | NM_008763    | chr1       | 174788862    | 174789759  |
| 1          | 174467138     | 174475637   | NM_026725    | chr1       | 174474779    | 174475466  |
| 1          | 174424664     | 174433243   | NM_029084    | chr1       | 174429819    | 174430422  |
| 1          | 174386613     | 174399080   | NM_177723    | chr1       | 174394923    | 174395987  |
| 1          | 174386613     | 174399080   | NM_177723    | chr1       | 174389487    | 174390487  |
| 1          | 174132151     | 174148391   | NM_178405    | chr1       | 174143584    | 174144200  |
| 1          | 174143082     | 174151599   | NM_080419    | chr1       | 174143584    | 174144200  |

|   |   |           |           |              |      |           |           |
|---|---|-----------|-----------|--------------|------|-----------|-----------|
|   | 2 | 173713260 | 173721759 | NM_172675    | chr2 | 173715304 | 173715893 |
|   | 1 | 173512684 | 173521229 | NM_007649    | chr1 | 173516359 | 173517185 |
|   | 2 | 173374510 | 173383020 | NM_019806    | chr2 | 173375087 | 173376336 |
|   | 1 | 172761745 | 172770258 | NM_145141    | chr1 | 172767900 | 172768462 |
|   | 2 | 172580733 | 172589232 | NM_007557    | chr2 | 172586120 | 172586751 |
|   | 2 | 172234819 | 172243459 | NM_009335    | chr2 | 172235388 | 172236041 |
|   | 1 | 172107995 | 172116498 | NM_012009    | chr1 | 172110050 | 172110481 |
|   | 1 | 171803345 | 171811880 | NM_010476    | chr1 | 171808384 | 171809123 |
|   | 1 | 171486176 | 171494714 | NM_009063    | chr1 | 171493838 | 171494451 |
|   | 1 | 171365573 | 171374139 | NM_023284    | chr1 | 171370477 | 171371139 |
|   | 2 | 170181633 | 170190132 | NM_001013369 | chr2 | 170184313 | 170184927 |
|   | 1 | 169429059 | 169437892 | NM_009107    | chr1 | 169436509 | 169437669 |
|   | 2 | 169318376 | 169327380 | NM_080455    | chr2 | 169325045 | 169326073 |
|   | 1 | 169300956 | 169309455 | NM_001013382 | chr1 | 169306243 | 169307318 |
|   | 1 | 169227973 | 169236472 | NM_025569    | chr1 | 169232702 | 169233301 |
|   | 2 | 168643965 | 168652474 | NM_009564    | chr2 | 168649914 | 168650533 |
|   | 1 | 167961103 | 167969641 | NM_021610    | chr1 | 167963762 | 167964484 |
|   | 1 | 167962055 | 167970573 | NM_001033344 | chr1 | 167963762 | 167964484 |
|   | 1 | 165892779 | 165901311 | NM_011346    | chr1 | 165899411 | 165900023 |
|   | 1 | 165825588 | 165834119 | NM_027279    | chr1 | 165829906 | 165830502 |
|   | 1 | 165828940 | 165837456 | NM_201364    | chr1 | 165829906 | 165830502 |
|   | 2 | 165573351 | 165581893 | NM_027230    | chr2 | 165580119 | 165580857 |
|   | 1 | 164644110 | 164655224 | NM_144878    | chr1 | 164655188 | 164655966 |
|   | 1 | 164644110 | 164655224 | NM_144878    | chr1 | 164652453 | 164653272 |
|   | 1 | 164644110 | 164655224 | NM_144878    | chr1 | 164648959 | 164649745 |
|   | 1 | 164644110 | 164655224 | NM_144878    | chr1 | 164645196 | 164646017 |
| X |   | 164527484 | 164537314 | NM_009666    | chrX | 164535920 | 164536528 |
|   | 2 | 164507891 | 164527521 | NM_008906    | chr2 | 164517892 | 164518505 |
|   | 2 | 164517202 | 164530661 | BC116354     | chr2 | 164517892 | 164518505 |
|   | 2 | 164298905 | 164307404 | NM_001012725 | chr2 | 164298341 | 164299312 |
|   | 2 | 164273883 | 164290799 | NM_001033240 | chr2 | 164274210 | 164274881 |
|   | 1 | 164129814 | 164138313 | BC024584     | chr1 | 164135085 | 164135753 |
|   | 2 | 163974724 | 163983223 | NM_021363    | chr2 | 163982538 | 163983126 |
|   | 2 | 163927207 | 163935706 | NM_017390    | chr2 | 163930451 | 163931335 |
|   | 2 | 163927207 | 163935706 | NM_017390    | chr2 | 163928592 | 163929405 |
|   | 2 | 163680638 | 163689138 | NM_018753    | chr2 | 163686486 | 163687172 |
|   | 1 | 163561783 | 163570359 | BC057865     | chr1 | 163568123 | 163569260 |
|   | 2 | 163539191 | 163547690 | NM_001030292 | chr2 | 163545627 | 163546243 |
|   | 2 | 163379478 | 163387982 | NM_011106    | chr2 | 163382155 | 163382816 |
|   | 2 | 163232629 | 163241128 | NM_008261    | chr2 | 163235418 | 163236184 |
|   | 2 | 163086892 | 163095391 | NM_021566    | chr2 | 163088202 | 163088852 |
|   | 2 | 162672987 | 162686890 | NM_013731    | chr2 | 162685453 | 162686051 |
|   | 2 | 162672987 | 162686890 | NM_013731    | chr2 | 162676039 | 162676739 |
| X |   | 162550740 | 162559323 | NM_021278    | chrX | 162552302 | 162553028 |
|   | 2 | 162349999 | 162358588 | NM_021464    | chr2 | 162357933 | 162358552 |
| X |   | 161821260 | 161833713 | NM_019773    | chrX | 161832675 | 161833290 |
|   | 2 | 160797998 | 160806516 | NM_173368    | chr2 | 160800715 | 160801354 |

|   |   |           |           |              |      |           |           |
|---|---|-----------|-----------|--------------|------|-----------|-----------|
|   | 2 | 160797998 | 160806516 | NM_173368    | chr2 | 160799385 | 160799995 |
|   | 2 | 160601270 | 160609769 | NM_182840    | chr2 | 160602629 | 160603239 |
| X |   | 160334006 | 160342505 | BC022692     | chrX | 160334021 | 160334660 |
| X |   | 159836008 | 159853010 | NM_027027    | chrX | 159846313 | 159846958 |
|   | 3 | 159802265 | 159810764 | BC018381     | chr3 | 159802713 | 159803775 |
| X |   | 159369567 | 159378102 | NM_019513    | chrX | 159369736 | 159370441 |
|   | 1 | 158669700 | 158678199 | NM_028333    | chr1 | 158669984 | 158671097 |
|   | 1 | 158553088 | 158561689 | NM_145413    | chr1 | 158560982 | 158561570 |
|   | 2 | 158188049 | 158196613 | NM_145635    | chr2 | 158195887 | 158196566 |
|   | 2 | 157943682 | 157952196 | NM_177850    | chr2 | 157948491 | 157949499 |
|   | 2 | 157026339 | 157034867 | M31658       | chr2 | 157026458 | 157027207 |
|   | 2 | 156695978 | 156704516 | NM_025853    | chr2 | 156701742 | 156702337 |
|   | 2 | 156576051 | 156584594 | BC052655     | chr2 | 156577826 | 156578444 |
| X |   | 156455298 | 156470872 | AF285577     | chrX | 156465625 | 156466258 |
|   | 2 | 156019301 | 156027800 | BC075727     | chr2 | 156022268 | 156022985 |
|   | 1 | 155496566 | 155505115 | NM_011267    | chr1 | 155497968 | 155498762 |
|   | 2 | 155460785 | 155469339 | NM_010808    | chr2 | 155468339 | 155468933 |
|   | 2 | 155276518 | 155290153 | NM_008180    | chr2 | 155287856 | 155288543 |
|   | 2 | 154698972 | 154707517 | NM_015770    | chr2 | 154705673 | 154706375 |
|   | 4 | 154669446 | 154693771 | NM_010091    | chr4 | 154691934 | 154692827 |
|   | 4 | 154615815 | 154624331 | NM_147776    | chr4 | 154622289 | 154623384 |
|   | 2 | 154581720 | 154590347 | NM_026030    | chr2 | 154584490 | 154585138 |
|   | 2 | 154292594 | 154301114 | NM_021534    | chr2 | 154300815 | 154301571 |
|   | 2 | 154298809 | 154307308 | NM_199304    | chr2 | 154300815 | 154301571 |
|   | 3 | 154186767 | 154195266 | BC068154     | chr3 | 154189652 | 154190283 |
|   | 3 | 154186767 | 154195266 | BC068154     | chr3 | 154187905 | 154188496 |
|   | 2 | 153992685 | 154001184 | NM_001025574 | chr2 | 153998576 | 153999882 |
|   | 2 | 153943295 | 153951819 | NM_175167    | chr2 | 153950802 | 153951638 |
|   | 2 | 153943295 | 153951819 | NM_175167    | chr2 | 153950011 | 153950679 |
|   | 2 | 153943295 | 153951819 | NM_175167    | chr2 | 153943936 | 153944656 |
|   | 3 | 153904822 | 153913321 | BC086641     | chr3 | 153912086 | 153912704 |
|   | 2 | 153828326 | 153836839 | NM_011126    | chr2 | 153833580 | 153834362 |
|   | 3 | 153799987 | 153808486 | AY351589     | chr3 | 153800988 | 153801564 |
|   | 2 | 153603671 | 153612170 | NM_194357    | chr2 | 153604747 | 153605361 |
|   | 2 | 153560026 | 153568525 | NM_029599    | chr2 | 153567625 | 153568360 |
|   | 2 | 153560486 | 153569030 | NM_025631    | chr2 | 153567625 | 153568360 |
|   | 2 | 153560026 | 153568525 | NM_029599    | chr2 | 153561108 | 153562095 |
|   | 2 | 153560486 | 153569030 | NM_025631    | chr2 | 153561108 | 153562095 |
| X |   | 153037223 | 153045816 | NM_025357    | chrX | 153041940 | 153042837 |
|   | 2 | 152926973 | 152935503 | NM_080463    | chr2 | 152929902 | 152930510 |
|   | 3 | 152917072 | 152925596 | NM_012028    | chr3 | 152923666 | 152924524 |
|   | 4 | 152813361 | 152821860 | NM_177673    | chr4 | 152818731 | 152819332 |
|   | 4 | 152816312 | 152824926 | NM_007859    | chr4 | 152818731 | 152819332 |
|   | 2 | 152751396 | 152759895 | NM_145536    | chr2 | 152757274 | 152757930 |
|   | 3 | 152434237 | 152442736 | AB060081     | chr3 | 152436139 | 152436961 |
|   | 3 | 152434237 | 152442736 | AB060081     | chr3 | 152434412 | 152435061 |
|   | 2 | 152269239 | 152277753 | NM_145157    | chr2 | 152276147 | 152276789 |

|   |   |           |           |              |      |           |           |
|---|---|-----------|-----------|--------------|------|-----------|-----------|
|   | 2 | 152269239 | 152277753 | NM_145157    | chr2 | 152275206 | 152275987 |
|   | 3 | 151772358 | 151781012 | NM_008966    | chr3 | 151775845 | 151776862 |
|   | 2 | 151596773 | 151605272 | NM_009641    | chr2 | 151598633 | 151599476 |
|   | 2 | 151528368 | 151536893 | NM_001040689 | chr2 | 151532765 | 151534315 |
|   | 4 | 151290114 | 151298613 | L48983       | chr4 | 151290409 | 151291033 |
|   | 4 | 151214373 | 151226792 | BC098195     | chr4 | 151217960 | 151218551 |
|   | 4 | 151159909 | 151168408 | NM_001033489 | chr4 | 151165289 | 151165849 |
|   | 4 | 151163526 | 151173779 | NM_009079    | chr4 | 151165289 | 151165849 |
|   | 5 | 150842871 | 150851370 | BC019754     | chr5 | 150848007 | 150848742 |
|   | 5 | 150842871 | 150851370 | BC019754     | chr5 | 150846434 | 150847176 |
| X |   | 150370717 | 150380008 | NM_020016    | chrX | 150375936 | 150376418 |
|   | 2 | 150297465 | 150305983 | NM_027977    | chr2 | 150305301 | 150305886 |
|   | 2 | 150255856 | 150264426 | NM_009977    | chr2 | 150262750 | 150263453 |
|   | 5 | 149702079 | 149710584 | BC120819     | chr5 | 149703826 | 149704359 |
|   | 5 | 149569407 | 149577906 | NM_009663    | chr5 | 149569506 | 149570144 |
|   | 6 | 149092744 | 149101290 | NM_177101    | chr6 | 149098882 | 149099497 |
| X |   | 148893309 | 148901808 | NM_173367    | chrX | 148899639 | 148900239 |
|   | 2 | 148564343 | 148572928 | NM_009976    | chr2 | 148571768 | 148572463 |
|   | 2 | 148484275 | 148492790 | NM_009978    | chr2 | 148490185 | 148491093 |
|   | 2 | 148460364 | 148468938 | NM_030059    | chr2 | 148465669 | 148466378 |
|   | 2 | 148460364 | 148468938 | NM_030059    | chr2 | 148463557 | 148464182 |
|   | 2 | 148421336 | 148429908 | NM_019632    | chr2 | 148425031 | 148425624 |
|   | 6 | 148305826 | 148314353 | NM_025405    | chr6 | 148305839 | 148306481 |
|   | 1 | 148270878 | 148279377 | BC030498     | chr1 | 148275347 | 148276455 |
|   | 5 | 148202652 | 148211164 | NM_027872    | chr5 | 148209960 | 148210571 |
|   | 5 | 147574475 | 147582979 | NM_008814    | chr5 | 147582147 | 147582943 |
|   | 4 | 146778002 | 146786504 | NM_011122    | chr4 | 146778002 | 146778715 |
|   | 4 | 146778695 | 146787221 | NM_029841    | chr4 | 146778002 | 146778715 |
|   | 6 | 146709628 | 146718130 | AY292400     | chr6 | 146711513 | 146712157 |
|   | 3 | 146094920 | 146103419 | BC029847     | chr3 | 146100325 | 146100965 |
|   | 3 | 146081219 | 146090059 | NM_026656    | chr3 | 146089090 | 146089724 |
| X |   | 145987852 | 146004299 | NM_001002272 | chrX | 145993758 | 145994810 |
|   | 1 | 145763851 | 145772499 | NM_009061    | chr1 | 145765283 | 145766070 |
|   | 6 | 145759542 | 145768070 | NM_027760    | chr6 | 145762064 | 145762624 |
|   | 6 | 145338785 | 145347284 | NM_001001987 | chr6 | 145344123 | 145345123 |
|   | 3 | 144784189 | 144792688 | NM_139148    | chr3 | 144786600 | 144787216 |
|   | 3 | 144754364 | 144762872 | NM_030601    | chr3 | 144756424 | 144757336 |
|   | 4 | 144511026 | 144519557 | NM_011610    | chr4 | 144516693 | 144517488 |
|   | 4 | 144511026 | 144519557 | NM_011610    | chr4 | 144511655 | 144512709 |
|   | 7 | 144418245 | 144426744 | BC006062     | chr7 | 144424921 | 144425569 |
|   | 2 | 144054476 | 144062975 | NM_181417    | chr2 | 144055901 | 144056674 |
|   | 5 | 143872086 | 143880711 | NM_011182    | chr5 | 143873899 | 143874489 |
|   | 7 | 143591187 | 143599708 | NM_175534    | chr7 | 143599057 | 143599660 |
|   | 7 | 143573884 | 143582383 | NM_203492    | chr7 | 143580192 | 143580905 |
|   | 7 | 143492763 | 143501262 | NM_024290    | chr7 | 143497350 | 143498216 |
|   | 7 | 142910644 | 142919337 | NM_008434    | chr7 | 142911272 | 142912287 |
|   | 5 | 142780001 | 142788550 | NM_019943    | chr5 | 142780500 | 142781103 |

|   |   |           |           |              |      |           |           |
|---|---|-----------|-----------|--------------|------|-----------|-----------|
|   | 6 | 142565817 | 142574316 | NM_177314    | chr6 | 142572139 | 142572722 |
|   | 6 | 142526032 | 142534581 | NM_008428    | chr6 | 142532317 | 142532990 |
|   | 3 | 142491531 | 142500493 | NM_018734    | chr3 | 142493296 | 142493876 |
|   | 7 | 142464303 | 142474879 | NM_010514    | chr7 | 142472772 | 142473803 |
|   | 6 | 142462666 | 142471179 | NM_008492    | chr6 | 142469684 | 142470863 |
|   | 7 | 142383906 | 142392849 | BC025150     | chr7 | 142387666 | 142388390 |
|   | 6 | 142277673 | 142286203 | NM_130861    | chr6 | 142278862 | 142279514 |
| X |   | 142202881 | 142211380 | NM_008312    | chrX | 142205549 | 142206290 |
|   | 7 | 142194746 | 142203290 | NM_009983    | chr7 | 142194856 | 142195794 |
|   | 3 | 142104106 | 142112605 | Z23143       | chr3 | 142108797 | 142109911 |
|   | 5 | 142103261 | 142111760 | NM_177879    | chr5 | 142103918 | 142104534 |
|   | 7 | 142036862 | 142045361 | NM_001037822 | chr7 | 142043817 | 142044500 |
|   | 6 | 141816078 | 141824577 | NM_030687    | chr6 | 141816636 | 141817290 |
|   | 7 | 141642460 | 141650959 | NM_028801    | chr7 | 141647186 | 141647822 |
|   | 7 | 141544512 | 141560657 | BC034197     | chr7 | 141558689 | 141559731 |
|   | 7 | 141544512 | 141560657 | BC034197     | chr7 | 141556245 | 141557412 |
|   | 7 | 141504140 | 141512640 | NM_181729    | chr7 | 141504670 | 141505421 |
|   | 7 | 141292976 | 141330256 | NM_009842    | chr7 | 141312035 | 141313138 |
|   | 3 | 141146663 | 141155742 | NM_008811    | chr3 | 141154738 | 141155404 |
|   | 7 | 141039477 | 141048963 | NM_153777    | chr7 | 141048656 | 141049328 |
|   | 7 | 141042703 | 141051314 | NM_008284    | chr7 | 141048656 | 141049328 |
|   | 5 | 140970601 | 140979100 | NM_173405    | chr5 | 140974317 | 140974939 |
|   | 7 | 140915595 | 140933597 | NM_019762    | chr7 | 140928056 | 140928636 |
|   | 7 | 140859517 | 140874228 | NM_025378    | chr7 | 140860926 | 140861531 |
|   | 7 | 140680599 | 140689315 | NM_029821    | chr7 | 140688233 | 140689067 |
|   | 7 | 140609059 | 140617651 | NM_021282    | chr7 | 140615796 | 140616785 |
|   | 7 | 140549485 | 140557984 | NM_146962    | chr7 | 140555652 | 140556808 |
|   | 7 | 140549485 | 140557984 | NM_146962    | chr7 | 140550895 | 140551483 |
|   | 7 | 140536204 | 140544703 | NM_146963    | chr7 | 140541134 | 140542046 |
|   | 7 | 140512609 | 140521108 | NM_146961    | chr7 | 140518727 | 140519983 |
|   | 1 | 140375692 | 140384191 | AF217650     | chr1 | 140376560 | 140377864 |
|   | 2 | 140360393 | 140368910 | NM_178382    | chr2 | 140366777 | 140367372 |
|   | 7 | 140311523 | 140320022 | NM_001011815 | chr7 | 140316477 | 140317167 |
|   | 7 | 140311523 | 140320022 | NM_001011815 | chr7 | 140313630 | 140314299 |
|   | 7 | 140268592 | 140277091 | NM_147026    | chr7 | 140271063 | 140271731 |
|   | 7 | 140222429 | 140230928 | NM_146519    | chr7 | 140224596 | 140225419 |
|   | 5 | 140217633 | 140226132 | BC059029     | chr5 | 140218462 | 140219361 |
|   | 7 | 140181184 | 140189683 | NM_001011776 | chr7 | 140185477 | 140186190 |
|   | 7 | 140168021 | 140176520 | NM_146956    | chr7 | 140171478 | 140172179 |
|   | 7 | 140051589 | 140060088 | NM_001011814 | chr7 | 140059158 | 140060059 |
|   | 7 | 140051589 | 140060088 | NM_001011814 | chr7 | 140057664 | 140058626 |
|   | 7 | 140021381 | 140029880 | NM_146518    | chr7 | 140022760 | 140023399 |
|   | 6 | 139997963 | 140006486 | NM_007605    | chr6 | 140005406 | 140006045 |
|   | 6 | 140001319 | 140009837 | NM_054066    | chr6 | 140005406 | 140006045 |
|   | 7 | 139897907 | 139906406 | NM_010836    | chr7 | 139904649 | 139905191 |
|   | 7 | 139679616 | 139694214 | BC056493     | chr7 | 139691201 | 139692072 |
|   | 7 | 139679616 | 139694214 | BC056493     | chr7 | 139687177 | 139687864 |

|   |   |           |           |              |      |           |           |
|---|---|-----------|-----------|--------------|------|-----------|-----------|
|   | 6 | 139574509 | 139583008 | NM_207683    | chr6 | 139582394 | 139582958 |
|   | 2 | 139179361 | 139188093 | NM_175467    | chr2 | 139185893 | 139186529 |
|   | 7 | 138931347 | 138939892 | NM_011993    | chr7 | 138933278 | 138933936 |
| X |   | 138906113 | 138914612 | U39738       | chrX | 138912757 | 138913374 |
|   | 7 | 138821623 | 138830125 | BC119557     | chr7 | 138826231 | 138826962 |
|   | 5 | 138791983 | 138800482 | NM_029693    | chr5 | 138794214 | 138794928 |
|   | 7 | 138672749 | 138681248 | BC069850     | chr7 | 138680957 | 138681730 |
|   | 7 | 138678702 | 138687320 | NM_026391    | chr7 | 138680957 | 138681730 |
|   | 5 | 138665292 | 138673791 | NM_028130    | chr5 | 138672939 | 138673585 |
| X |   | 138634017 | 138646552 | NM_031258    | chrX | 138638802 | 138639405 |
|   | 5 | 138453610 | 138462109 | NM_001013773 | chr5 | 138454125 | 138454587 |
|   | 6 | 138384567 | 138393066 | BC057086     | chr6 | 138390558 | 138391217 |
|   | 4 | 138006744 | 138015243 | NM_178671    | chr4 | 138010805 | 138011538 |
|   | 3 | 138002276 | 138010775 | NM_177860    | chr3 | 138009850 | 138010728 |
|   | 5 | 138002706 | 138011238 | NM_027242    | chr5 | 138007980 | 138008585 |
|   | 3 | 138002276 | 138010775 | NM_177860    | chr3 | 138002990 | 138003642 |
|   | 4 | 137994433 | 138002932 | BC027099     | chr4 | 138002183 | 138002820 |
|   | 1 | 137861182 | 137871694 | L06234       | chr1 | 137867202 | 137867805 |
|   | 1 | 137861182 | 137871694 | L06234       | chr1 | 137866453 | 137867043 |
|   | 5 | 137793639 | 137803258 | NM_015799    | chr5 | 137796303 | 137797155 |
|   | 5 | 137742656 | 137751167 | NM_031408    | chr5 | 137743832 | 137744972 |
|   | 1 | 137646765 | 137659767 | NM_011619    | chr1 | 137651302 | 137651949 |
|   | 1 | 137629009 | 137637849 | NM_133664    | chr1 | 137633141 | 137633814 |
|   | 5 | 137426039 | 137434538 | BC058768     | chr5 | 137426319 | 137426935 |
|   | 3 | 137272489 | 137281029 | NM_016885    | chr3 | 137278786 | 137279507 |
|   | 3 | 137272489 | 137281029 | NM_016885    | chr3 | 137275390 | 137276300 |
|   | 5 | 137240713 | 137255006 | NM_021719    | chr5 | 137253265 | 137254031 |
|   | 6 | 137210530 | 137219160 | NM_011216    | chr6 | 137218124 | 137218953 |
|   | 7 | 136783617 | 136792116 | M84524       | chr7 | 136790446 | 136791319 |
|   | 2 | 136398894 | 136407502 | NM_011428    | chr2 | 136403332 | 136403956 |
|   | 4 | 136226393 | 136234894 | NM_007939    | chr4 | 136232107 | 136233076 |
|   | 4 | 136155690 | 136176879 | NM_007574    | chr4 | 136166805 | 136167763 |
|   | 1 | 136100400 | 136108933 | NM_031189    | chr1 | 136102118 | 136102735 |
|   | 1 | 136003859 | 136012391 | NM_016749    | chr1 | 136004068 | 136004678 |
|   | 1 | 135949057 | 135957556 | AY536287     | chr1 | 135952126 | 135952755 |
|   | 1 | 135949057 | 135957556 | AY536287     | chr1 | 135949386 | 135950332 |
|   | 6 | 135322624 | 135335685 | NM_010128    | chr6 | 135332057 | 135332755 |
|   | 5 | 135264841 | 135273531 | NM_009902    | chr5 | 135264947 | 135265412 |
|   | 1 | 135249081 | 135257580 | BC007130     | chr1 | 135253140 | 135254275 |
|   | 6 | 135080095 | 135089976 | NM_053118    | chr6 | 135081880 | 135082592 |
| X |   | 134950984 | 134959506 | NM_023270    | chrX | 134956348 | 134957065 |
|   | 4 | 134667798 | 134681630 | NM_145555    | chr4 | 134678244 | 134678704 |
|   | 6 | 134529976 | 134538606 | NM_008514    | chr6 | 134536356 | 134537021 |
|   | 5 | 134511707 | 134520231 | NM_010876    | chr5 | 134517520 | 134518124 |
|   | 5 | 134454973 | 134471164 | NM_053266    | chr5 | 134468518 | 134469110 |
|   | 1 | 134428892 | 134437391 | BC062092     | chr1 | 134434365 | 134434954 |
| X |   | 134427566 | 134437581 | NM_177920    | chrX | 134430138 | 134430883 |

|   |   |           |           |              |      |           |           |
|---|---|-----------|-----------|--------------|------|-----------|-----------|
|   | 6 | 133816847 | 133825363 | NM_010594    | chr6 | 133822000 | 133822401 |
|   | 6 | 133816847 | 133825363 | NM_010594    | chr6 | 133817684 | 133818479 |
|   | 4 | 133763054 | 133771582 | NM_027995    | chr4 | 133766163 | 133767019 |
|   | 7 | 133612647 | 133627069 | NM_133941    | chr7 | 133621763 | 133625087 |
|   | 1 | 133565568 | 133580620 | NM_177243    | chr1 | 133565983 | 133566913 |
|   | 7 | 133538314 | 133553638 | NM_009479    | chr7 | 133552513 | 133553384 |
|   | 3 | 133169696 | 133178195 | NM_029953    | chr3 | 133171530 | 133172129 |
|   | 1 | 133025122 | 133033621 | AY261333     | chr1 | 133032626 | 133033320 |
|   | 7 | 132861636 | 132870135 | AF016508     | chr7 | 132865320 | 132866165 |
|   | 7 | 132861636 | 132870135 | AF016508     | chr7 | 132861899 | 132862510 |
|   | 7 | 132851334 | 132859833 | BC017520     | chr7 | 132859169 | 132859786 |
|   | 7 | 132851334 | 132859833 | BC017520     | chr7 | 132856011 | 132856690 |
|   | 1 | 132841393 | 132849915 | NM_010548    | chr1 | 132848513 | 132849182 |
|   | 1 | 132841393 | 132849915 | NM_010548    | chr1 | 132845556 | 132846539 |
|   | 6 | 132806835 | 132823630 | NM_207025    | chr6 | 132820640 | 132821291 |
|   | 1 | 132736333 | 132744997 | NM_021380    | chr1 | 132737107 | 132738930 |
|   | 1 | 132711043 | 132720885 | NM_053095    | chr1 | 132716870 | 132717390 |
|   | 1 | 132648297 | 132664418 | NM_011082    | chr1 | 132662687 | 132663713 |
|   | 7 | 132649040 | 132657539 | NM_212473    | chr7 | 132654520 | 132655164 |
|   | 1 | 132622448 | 132630947 | NM_144960    | chr1 | 132627358 | 132628331 |
|   | 4 | 132608682 | 132617181 | NM_199306    | chr4 | 132611063 | 132611750 |
|   | 4 | 132192088 | 132200587 | NM_145553    | chr4 | 132194682 | 132195372 |
|   | 7 | 132106443 | 132114942 | AF320786     | chr7 | 132114179 | 132114865 |
| X |   | 132048396 | 132056928 | NM_146236    | chrX | 132054564 | 132055483 |
| X |   | 132006824 | 132015327 | NM_001029978 | chrX | 132013298 | 132014138 |
|   | 8 | 131947224 | 131955723 | NM_029292    | chr8 | 131950193 | 131950672 |
|   | 8 | 131949064 | 131957607 | NM_029061    | chr8 | 131950193 | 131950672 |
|   | 2 | 131834004 | 131842549 | NM_018824    | chr2 | 131836358 | 131837276 |
|   | 7 | 131798803 | 131807444 | NM_173410    | chr7 | 131802631 | 131803579 |
|   | 7 | 131798803 | 131807444 | NM_173410    | chr7 | 131801074 | 131801781 |
|   | 2 | 131636303 | 131646949 | NM_023043    | chr2 | 131636423 | 131637094 |
| X |   | 131610691 | 131626368 | NM_009750    | chrX | 131618738 | 131619184 |
|   | 3 | 131331580 | 131340090 | NM_028943    | chr3 | 131333334 | 131334166 |
|   | 3 | 131258683 | 131267198 | NM_008212    | chr3 | 131261079 | 131261730 |
|   | 2 | 131251227 | 131259726 | NM_013460    | chr2 | 131258840 | 131259435 |
|   | 6 | 131208574 | 131225742 | NM_008462    | chr6 | 131222080 | 131222697 |
|   | 4 | 131139732 | 131148254 | BC019437     | chr4 | 131141528 | 131142616 |
|   | 7 | 130817224 | 130825723 | NM_007769    | chr7 | 130822335 | 130823328 |
|   | 7 | 130817224 | 130825723 | NM_007769    | chr7 | 130817248 | 130817971 |
|   | 2 | 130752487 | 130761255 | NM_033615    | chr2 | 130752756 | 130753357 |
| X |   | 130713648 | 130722160 | NM_183320    | chrX | 130714786 | 130716211 |
|   | 5 | 130648179 | 130656678 | AF282251     | chr5 | 130654430 | 130655023 |
|   | 7 | 130561301 | 130569800 | AB036742     | chr7 | 130567474 | 130568336 |
|   | 7 | 130477704 | 130486203 | NM_021314    | chr7 | 130485211 | 130485816 |
|   | 6 | 130343903 | 130358667 | NM_016659    | chr6 | 130345821 | 130346428 |
|   | 2 | 130113214 | 130122128 | NM_178762    | chr2 | 130121315 | 130121898 |
|   | 8 | 129944335 | 129952834 | NM_033620    | chr8 | 129946027 | 129946769 |

|   |    |           |           |           |       |           |           |
|---|----|-----------|-----------|-----------|-------|-----------|-----------|
|   | 3  | 129864628 | 129875705 | NM_023196 | chr3  | 129870060 | 129870792 |
|   | 1  | 129860058 | 129868584 | NM_009081 | chr1  | 129861145 | 129862160 |
|   | 6  | 129551475 | 129561680 | NM_010654 | chr6  | 129556778 | 129557381 |
|   | 4  | 129544192 | 129552765 | NM_028266 | chr4  | 129544439 | 129545591 |
|   | 3  | 129518408 | 129527062 | NM_130450 | chr3  | 129518407 | 129519110 |
|   | 4  | 129481468 | 129489967 | NM_173071 | chr4  | 129483178 | 129483952 |
| X |    | 129455559 | 129464058 | NM_172203 | chrX  | 129462962 | 129464034 |
|   | 6  | 129435957 | 129444465 | NM_020008 | chr6  | 129439727 | 129440344 |
|   | 4  | 129335708 | 129344276 | NM_008974 | chr4  | 129341271 | 129341954 |
|   | 2  | 129225544 | 129234043 | NM_177653 | chr2  | 129225919 | 129226632 |
|   | 2  | 129055338 | 129067069 | NM_177848 | chr2  | 129059348 | 129059981 |
|   | 6  | 129005520 | 129014054 | NM_181064 | chr6  | 129011486 | 129012151 |
|   | 8  | 128875260 | 128884016 | NM_008430 | chr8  | 128882399 | 128883054 |
|   | 6  | 128847207 | 128855732 | NM_020257 | chr6  | 128852589 | 128853274 |
|   | 10 | 128575469 | 128583968 | NM_146266 | chr10 | 128576842 | 128577468 |
|   | 10 | 128561432 | 128569931 | NM_146547 | chr10 | 128564351 | 128565038 |
|   | 8  | 128549956 | 128558455 | NM_028908 | chr8  | 128552342 | 128552953 |
|   | 10 | 128494422 | 128502921 | NM_146864 | chr10 | 128500871 | 128501508 |
|   | 4  | 128462222 | 128470743 | NM_172875 | chr4  | 128467482 | 128468328 |
|   | 10 | 128386798 | 128395297 | NM_146861 | chr10 | 128392898 | 128393543 |
|   | 7  | 128308764 | 128317419 | NM_013863 | chr7  | 128310199 | 128311092 |
|   | 4  | 128185099 | 128193598 | BC057571  | chr4  | 128186531 | 128187682 |
|   | 10 | 128137540 | 128153005 | NM_016811 | chr10 | 128148142 | 128148812 |
|   | 10 | 128144838 | 128153970 | NM_030100 | chr10 | 128148142 | 128148812 |
|   | 7  | 127994986 | 128003514 | NM_009943 | chr7  | 127995678 | 127996317 |
|   | 2  | 127811479 | 127821515 | NM_207680 | chr2  | 127817470 | 127818065 |
|   | 6  | 127731849 | 127740366 | NM_201371 | chr6  | 127736593 | 127737209 |
|   | 10 | 127622787 | 127659792 | NM_011589 | chr10 | 127634264 | 127635131 |
|   | 1  | 127498539 | 127507040 | BC085285  | chr1  | 127503831 | 127504428 |
|   | 10 | 127263425 | 127271950 | NM_145424 | chr10 | 127263595 | 127264260 |
|   | 1  | 127260465 | 127269234 | NM_023735 | chr1  | 127263342 | 127264100 |
|   | 10 | 127246877 | 127255376 | NM_147222 | chr10 | 127253095 | 127253833 |
|   | 10 | 127246877 | 127255376 | NM_147222 | chr10 | 127250266 | 127250870 |
|   | 2  | 127210252 | 127218811 | NM_019789 | chr2  | 127211622 | 127212497 |
|   | 10 | 127198103 | 127206632 | NM_009040 | chr10 | 127204348 | 127205436 |
|   | 7  | 127175785 | 127190767 | NM_030226 | chr7  | 127184930 | 127185551 |
|   | 10 | 127156759 | 127165258 | NM_080436 | chr10 | 127163051 | 127163652 |
|   | 10 | 127152143 | 127160747 | NM_007412 | chr10 | 127158333 | 127159231 |
|   | 10 | 127156759 | 127165258 | NM_080436 | chr10 | 127158333 | 127159231 |
|   | 10 | 127152143 | 127160747 | NM_007412 | chr10 | 127153783 | 127154645 |
|   | 10 | 127121427 | 127130874 | NM_009312 | chr10 | 127123668 | 127124355 |
|   | 6  | 127114057 | 127122667 | NM_009829 | chr6  | 127116291 | 127116980 |
|   | 7  | 126984636 | 127005616 | NM_144522 | chr7  | 126997160 | 126997974 |
|   | 7  | 126996756 | 127005371 | NM_016754 | chr7  | 126997160 | 126997974 |
|   | 3  | 126987926 | 126996474 | NM_178655 | chr3  | 126992137 | 126992838 |
|   | 3  | 126987926 | 126996474 | NM_178655 | chr3  | 126990896 | 126991488 |
|   | 6  | 126975161 | 126983660 | NM_010204 | chr6  | 126975932 | 126976551 |



|    |           |           |              |       |           |           |
|----|-----------|-----------|--------------|-------|-----------|-----------|
| 4  | 126852273 | 126866468 | NM_010291    | chr4  | 126852628 | 126853774 |
| 6  | 126703271 | 126712460 | NM_013568    | chr6  | 126711698 | 126712324 |
| 10 | 126687757 | 126696258 | NM_007837    | chr10 | 126696152 | 126696937 |
| 10 | 126689221 | 126697720 | NM_033072    | chr10 | 126696152 | 126696937 |
| 8  | 126686115 | 126694614 | NM_009003    | chr8  | 126689160 | 126689796 |
| 4  | 126665575 | 126677683 | NM_198618    | chr4  | 126672340 | 126673312 |
| 7  | 126414119 | 126422637 | NM_019738    | chr7  | 126420522 | 126421115 |
| 7  | 126203485 | 126211984 | NM_009844    | chr7  | 126207455 | 126208547 |
| 4  | 126173970 | 126182519 | NM_011970    | chr4  | 126174123 | 126174973 |
| 8  | 126041851 | 126050355 | NM_020564    | chr8  | 126042911 | 126043501 |
| 5  | 125759311 | 125767853 | NM_030210    | chr5  | 125759996 | 125760807 |
| 5  | 125720925 | 125729442 | NM_203319    | chr5  | 125721093 | 125721648 |
| 5  | 125627412 | 125636053 | NM_016741    | chr5  | 125631635 | 125632203 |
| 2  | 125544659 | 125560193 | NM_175154    | chr2  | 125549904 | 125550830 |
| 2  | 125547927 | 125556459 | NM_009939    | chr2  | 125549904 | 125550830 |
| 3  | 125423702 | 125432201 | NM_022565    | chr3  | 125424041 | 125424458 |
| 10 | 125363202 | 125371724 | NM_177152    | chr10 | 125369814 | 125370388 |
| 5  | 125286426 | 125294953 | NM_028443    | chr5  | 125288889 | 125289499 |
| 6  | 125276969 | 125285473 | NM_010736    | chr6  | 125285133 | 125285943 |
| 6  | 125281329 | 125289971 | NM_011324    | chr6  | 125285133 | 125285943 |
| 6  | 125194980 | 125208646 | NM_145391    | chr6  | 125207190 | 125207561 |
| 6  | 125089213 | 125113919 | NM_178787    | chr6  | 125111263 | 125111942 |
| 6  | 124874759 | 124889550 | NM_008479    | chr6  | 124876146 | 124876655 |
| 8  | 124828458 | 124837002 | NM_007608    | chr8  | 124836333 | 124836995 |
| 2  | 124753568 | 124762107 | NM_175034    | chr2  | 124760455 | 124761291 |
| 2  | 124753568 | 124762107 | NM_175034    | chr2  | 124758016 | 124758941 |
| 6  | 124696175 | 124712906 | NM_013535    | chr6  | 124706548 | 124707215 |
| 4  | 124627645 | 124636144 | NM_153159    | chr4  | 124633614 | 124634217 |
| 4  | 124627645 | 124636144 | NM_153159    | chr4  | 124628178 | 124629373 |
| 6  | 124452753 | 124461268 | NM_181344    | chr6  | 124458234 | 124459035 |
| 4  | 124298876 | 124307413 | NM_008636    | chr4  | 124304772 | 124305360 |
| 2  | 124295737 | 124304942 | NM_172537    | chr2  | 124299292 | 124299838 |
| 6  | 124264275 | 124272825 | NM_053094    | chr6  | 124270774 | 124271442 |
| 5  | 124161893 | 124170424 | NM_026603    | chr5  | 124167980 | 124168764 |
| 5  | 123870270 | 123878769 | AF185286     | chr5  | 123874836 | 123875756 |
| 9  | 123814694 | 123823364 | NM_009912    | chr9  | 123817161 | 123818216 |
| 5  | 123740219 | 123748719 | BC117082     | chr5  | 123741175 | 123741892 |
| 9  | 123697768 | 123706267 | NM_148925    | chr9  | 123704359 | 123704958 |
| 5  | 123599070 | 123607735 | NM_029850    | chr5  | 123599180 | 123599714 |
| 9  | 123536419 | 123544918 | BC083136     | chr9  | 123539617 | 123540657 |
| 9  | 123478588 | 123487174 | NM_011731    | chr9  | 123480181 | 123480765 |
| 1  | 123353410 | 123362011 | NM_010483    | chr1  | 123353545 | 123354194 |
| 6  | 123189476 | 123197992 | NM_020001    | chr6  | 123193761 | 123194920 |
| 7  | 123189571 | 123198070 | BC010316     | chr7  | 123191395 | 123191998 |
| 6  | 123132641 | 123141140 | NM_001004159 | chr6  | 123136976 | 123137590 |
| 6  | 122949986 | 122958485 | NM_001005860 | chr6  | 122953845 | 122954463 |
| 8  | 122872453 | 122880952 | NM_030209    | chr8  | 122874919 | 122875733 |

|    |           |           |              |       |           |           |
|----|-----------|-----------|--------------|-------|-----------|-----------|
| 7  | 122755967 | 122764574 | NM_175023    | chr7  | 122761471 | 122762185 |
| 6  | 122416496 | 122425004 | BC096392     | chr6  | 122422700 | 122423352 |
| 2  | 122391406 | 122400104 | NM_011774    | chr2  | 122394428 | 122395104 |
| 6  | 122300117 | 122311257 | NM_007905    | chr6  | 122306599 | 122307515 |
| 7  | 122074273 | 122082953 | NM_008855    | chr7  | 122081671 | 122082512 |
| 14 | 122042247 | 122050746 | NM_001039531 | chr14 | 122046039 | 122046671 |
| 14 | 122033216 | 122041715 | NM_145466    | chr14 | 122035812 | 122036813 |
| 5  | 121803409 | 121812509 | NM_010765    | chr5  | 121805021 | 121805939 |
| 9  | 121762489 | 121770995 | NM_010012    | chr9  | 121762486 | 121763097 |
| 11 | 121640351 | 121648892 | AB235902     | chr11 | 121644145 | 121644792 |
| 9  | 121638562 | 121647082 | NM_029095    | chr9  | 121643488 | 121644099 |
| 6  | 121595846 | 121604351 | NM_175628    | chr6  | 121603286 | 121604055 |
| 3  | 121521247 | 121530361 | NM_145394    | chr3  | 121521114 | 121521771 |
| 9  | 121430698 | 121439197 | AY572449     | chr9  | 121437907 | 121438573 |
| 9  | 121430698 | 121439197 | AY572449     | chr9  | 121431984 | 121432938 |
| 2  | 121274926 | 121283425 | BC057549     | chr2  | 121276445 | 121277479 |
| 9  | 121209666 | 121218213 | BC058971     | chr9  | 121213416 | 121214203 |
| 5  | 121169468 | 121177982 | NM_133893    | chr5  | 121176650 | 121177697 |
| 5  | 121165625 | 121174128 | NM_145211    | chr5  | 121169822 | 121170692 |
| 5  | 121169468 | 121177982 | NM_133893    | chr5  | 121169822 | 121170692 |
| 8  | 121163722 | 121172273 | NM_019707    | chr8  | 121168023 | 121168712 |
| 5  | 121145700 | 121154230 | NM_011852    | chr5  | 121149604 | 121150598 |
| 14 | 121123544 | 121132043 | BC017635     | chr14 | 121129688 | 121130348 |
| 14 | 121097769 | 121106373 | NM_183031    | chr14 | 121103295 | 121103765 |
| 11 | 120876823 | 120885659 | NM_026907    | chr11 | 120883556 | 120884484 |
| 7  | 120868587 | 120877086 | NM_139310    | chr7  | 120875770 | 120876828 |
| 11 | 120852998 | 120861508 | NM_009854    | chr11 | 120856023 | 120856828 |
| 11 | 120852998 | 120861508 | NM_009854    | chr11 | 120853003 | 120853784 |
| 11 | 120804910 | 120813423 | NM_027874    | chr11 | 120809036 | 120809753 |
| 6  | 120795849 | 120804348 | NM_153516    | chr6  | 120796845 | 120797356 |
| 14 | 120725125 | 120733624 | BC057692     | chr14 | 120729669 | 120730710 |
| 14 | 120725125 | 120733624 | BC057692     | chr14 | 120725655 | 120726716 |
| 8  | 120554993 | 120565619 | NM_028725    | chr8  | 120561881 | 120562654 |
| 8  | 120554993 | 120565619 | NM_028725    | chr8  | 120555030 | 120555560 |
| 11 | 120540835 | 120554085 | NM_007621    | chr11 | 120544989 | 120545927 |
| 10 | 120480815 | 120489314 | BC004048     | chr10 | 120488556 | 120489154 |
| 11 | 120431475 | 120455637 | NM_024229    | chr11 | 120447247 | 120448256 |
| 9  | 120382541 | 120391047 | NM_178676    | chr9  | 120388848 | 120389537 |
| 9  | 120146771 | 120155270 | NM_144557    | chr9  | 120147933 | 120149015 |
| 9  | 119992440 | 120005908 | NM_008614    | chr9  | 120002340 | 120002977 |
| 9  | 119992440 | 120005908 | NM_008614    | chr9  | 119995307 | 119996120 |
| 8  | 119975831 | 119984474 | NM_021486    | chr8  | 119979666 | 119980329 |
| 4  | 119944878 | 119953377 | BC034667     | chr4  | 119949561 | 119950145 |
| 8  | 119876927 | 119885430 | NM_026572    | chr8  | 119884571 | 119885387 |
| 11 | 119753182 | 119761723 | NM_130862    | chr11 | 119757797 | 119758395 |
| 10 | 119602059 | 119610597 | NM_028679    | chr10 | 119604717 | 119605784 |
| 7  | 119546072 | 119560538 | NM_016870    | chr7  | 119553427 | 119553983 |

|    |           |           |              |       |           |           |
|----|-----------|-----------|--------------|-------|-----------|-----------|
| 14 | 119454136 | 119462635 | BC075665     | chr14 | 119461047 | 119461678 |
| 14 | 119454136 | 119462635 | BC075665     | chr14 | 119457034 | 119457764 |
| 7  | 119402972 | 119411493 | NM_054094    | chr7  | 119407307 | 119407941 |
| 7  | 119339618 | 119355380 | NM_146197    | chr7  | 119353984 | 119354958 |
| 7  | 119311414 | 119319989 | BC095985     | chr7  | 119315964 | 119316652 |
| 6  | 119293853 | 119302352 | NM_172492    | chr6  | 119297662 | 119298483 |
| 12 | 119284431 | 119294157 | NM_177082    | chr12 | 119284519 | 119285128 |
| 7  | 119266962 | 119276404 | NM_009470    | chr7  | 119275126 | 119275785 |
| 7  | 119247917 | 119256421 | NM_025989    | chr7  | 119255287 | 119256377 |
| 6  | 119159351 | 119167850 | NM_009781    | chr6  | 119164088 | 119164678 |
| 14 | 119155529 | 119164028 | BC119200     | chr14 | 119161441 | 119162485 |
| 4  | 119129647 | 119138169 | NM_008190    | chr4  | 119133014 | 119133844 |
| 7  | 118973098 | 118981597 | NM_001024138 | chr7  | 118980441 | 118981059 |
| 7  | 118973098 | 118981597 | NM_001024138 | chr7  | 118975607 | 118976784 |
| 4  | 118747373 | 118755940 | NM_153105    | chr4  | 118749509 | 118750255 |
| 4  | 118453510 | 118462398 | NM_133892    | chr4  | 118460382 | 118460976 |
| 2  | 118417380 | 118425879 | NM_177568    | chr2  | 118425143 | 118425808 |
| 4  | 118385017 | 118393516 | NM_146334    | chr4  | 118390879 | 118392883 |
| 4  | 118360715 | 118369214 | NM_001011856 | chr4  | 118366841 | 118367444 |
| 4  | 118325871 | 118334370 | NM_207157    | chr4  | 118327354 | 118328105 |
| 4  | 118278016 | 118286515 | NM_146309    | chr4  | 118279933 | 118280803 |
| 14 | 118267483 | 118276021 | NM_015820    | chr14 | 118270567 | 118271381 |
| 4  | 118218181 | 118234962 | NM_146304    | chr4  | 118231189 | 118232039 |
| 4  | 118157451 | 118165950 | NM_146315    | chr4  | 118164115 | 118164694 |
| 4  | 118157451 | 118165950 | NM_146315    | chr4  | 118158735 | 118159375 |
| 4  | 118037733 | 118047660 | NM_172383    | chr4  | 118042595 | 118043561 |
| 13 | 118012563 | 118021062 | BC021315     | chr13 | 118016885 | 118017509 |
| 2  | 117945800 | 117954407 | NM_027759    | chr2  | 117948946 | 117949536 |
| 4  | 117868515 | 117878206 | BC059842     | chr4  | 117869718 | 117870331 |
| 10 | 117838040 | 117846610 | NM_008337    | chr10 | 117838279 | 117838894 |
| 11 | 117807535 | 117823957 | AF411101     | chr11 | 117820948 | 117821787 |
| 11 | 117683402 | 117695616 | NM_027919    | chr11 | 117692512 | 117693107 |
| 4  | 117042426 | 117050949 | NM_080469    | chr4  | 117050053 | 117050691 |
| 3  | 116958161 | 116966956 | NM_023245    | chr3  | 116961660 | 116962253 |
| 3  | 116958161 | 116966956 | NM_023245    | chr3  | 116959664 | 116960721 |
| 12 | 116851515 | 116860014 | AY455829     | chr12 | 116853942 | 116854567 |
| 10 | 116694479 | 116702993 | NM_013590    | chr10 | 116699567 | 116700207 |
| 10 | 116683875 | 116692397 | NM_017372    | chr10 | 116684442 | 116685162 |
| 2  | 116564149 | 116572667 | NM_026104    | chr2  | 116569147 | 116569933 |
| 3  | 116549026 | 116557581 | NM_175413    | chr3  | 116554697 | 116555675 |
| 5  | 116547463 | 116555984 | NM_177759    | chr5  | 116549887 | 116550741 |
| 6  | 116546151 | 116554650 | NM_146446    | chr6  | 116546147 | 116546756 |
| 4  | 116487280 | 116501285 | NM_175244    | chr4  | 116494098 | 116494858 |
| 4  | 116489131 | 116498307 | NM_009478    | chr4  | 116494098 | 116494858 |
| 6  | 116453230 | 116461729 | NM_146912    | chr6  | 116458882 | 116459727 |
| 6  | 116453230 | 116461729 | NM_146912    | chr6  | 116457229 | 116457808 |
| 6  | 116424298 | 116432797 | NM_009662    | chr6  | 116427295 | 116427909 |

|    |           |           |              |       |           |           |
|----|-----------|-----------|--------------|-------|-----------|-----------|
| 10 | 116384424 | 116392923 | NM_001007583 | chr10 | 116389027 | 116389679 |
| 10 | 116351991 | 116360490 | NM_001003950 | chr10 | 116358936 | 116359945 |
| 4  | 116147000 | 116155583 | NM_021473    | chr4  | 116151346 | 116151943 |
| 7  | 115978491 | 115986990 | NM_172743    | chr7  | 115985166 | 115985770 |
| 7  | 115978491 | 115986990 | NM_172743    | chr7  | 115979867 | 115980461 |
| 9  | 115887287 | 115895791 | BC053377     | chr9  | 115890652 | 115891870 |
| 7  | 115613357 | 115621856 | BC067407     | chr7  | 115619324 | 115619929 |
| 10 | 115515490 | 115523989 | NM_001033821 | chr10 | 115518394 | 115519423 |
| 4  | 115419250 | 115429570 | AF499446     | chr4  | 115422278 | 115423449 |
| 4  | 115320024 | 115328523 | NM_175308    | chr4  | 115325581 | 115326186 |
| 13 | 115269971 | 115278470 | NM_177004    | chr13 | 115272555 | 115273633 |
| 6  | 115214949 | 115223468 | NM_080639    | chr6  | 115220116 | 115220733 |
| 11 | 115117253 | 115125752 | NM_172801    | chr11 | 115124190 | 115125199 |
| 4  | 115010219 | 115018747 | NM_201640    | chr4  | 115013159 | 115014182 |
| 4  | 115010219 | 115018747 | NM_201640    | chr4  | 115012152 | 115012767 |
| 12 | 114901434 | 114909951 | BC108375     | chr12 | 114906365 | 114906977 |
| 11 | 114875630 | 114884129 | NM_172050    | chr11 | 114880947 | 114881524 |
| 11 | 114875630 | 114884129 | NM_172050    | chr11 | 114879957 | 114880563 |
| 11 | 114861921 | 114870420 | NM_199201    | chr11 | 114863650 | 114864490 |
| 11 | 114661631 | 114670644 | NM_147217    | chr11 | 114661642 | 114662264 |
| 11 | 114609014 | 114617513 | NM_181749    | chr11 | 114613673 | 114614421 |
| 11 | 114609466 | 114617982 | NM_028055    | chr11 | 114613673 | 114614421 |
| 10 | 114586624 | 114595132 | NM_173391    | chr10 | 114586645 | 114587469 |
| 8  | 114575184 | 114583683 | NM_025583    | chr8  | 114577842 | 114578295 |
| 7  | 114553882 | 114562381 | BC026405     | chr7  | 114561363 | 114562343 |
| X  | 114538179 | 114546761 | BC111833     | chrX  | 114545737 | 114546413 |
| 7  | 114424938 | 114433444 | NM_001033954 | chr7  | 114429675 | 114430731 |
| 13 | 114344287 | 114352786 | NM_008196    | chr13 | 114352045 | 114352719 |
| 12 | 114304973 | 114313478 | BC057688     | chr12 | 114306452 | 114307401 |
| 5  | 114088933 | 114097474 | NM_009151    | chr5  | 114094398 | 114095000 |
| 5  | 113990802 | 113999309 | NM_001010825 | chr5  | 113996649 | 113997273 |
| 6  | 113943861 | 113952360 | AF053471     | chr6  | 113951538 | 113952156 |
| 12 | 113753262 | 113761761 | BC057672     | chr12 | 113757155 | 113757489 |
| 12 | 113753262 | 113761761 | BC057672     | chr12 | 113755876 | 113757025 |
| 12 | 113753262 | 113761761 | BC057672     | chr12 | 113753367 | 113754002 |
| 2  | 113741742 | 113750252 | NM_009608    | chr2  | 113749139 | 113749805 |
| 2  | 113741742 | 113750252 | NM_009608    | chr2  | 113743345 | 113743993 |
| 8  | 113690050 | 113698580 | NM_029646    | chr8  | 113692881 | 113693550 |
| 13 | 113578987 | 113595986 | NM_010560    | chr13 | 113583706 | 113584746 |
| 11 | 113379353 | 113387858 | NM_027216    | chr11 | 113385637 | 113386416 |
| 5  | 113306570 | 113316420 | NM_007773    | chr5  | 113313601 | 113314199 |
| 12 | 113301188 | 113314760 | NM_019925    | chr12 | 113312236 | 113313004 |
| 12 | 113301188 | 113314760 | NM_019925    | chr12 | 113306143 | 113307102 |
| 5  | 113253318 | 113261817 | NM_177078    | chr5  | 113253617 | 113254408 |
| 6  | 113197670 | 113206169 | NM_026849    | chr6  | 113198964 | 113199653 |
| 2  | 113122575 | 113131074 | NM_010230    | chr2  | 113128709 | 113129855 |
| 8  | 113101118 | 113109617 | NM_146215    | chr8  | 113101395 | 113102066 |

|    |           |           |              |       |           |           |
|----|-----------|-----------|--------------|-------|-----------|-----------|
| 7  | 113059813 | 113068312 | BC025973     | chr7  | 113065298 | 113065940 |
| 7  | 113024935 | 113033434 | NM_177248    | chr7  | 113029919 | 113030703 |
| 7  | 113024935 | 113033434 | NM_177248    | chr7  | 113027725 | 113028313 |
| 8  | 112962891 | 112971390 | NM_175480    | chr8  | 112964186 | 112964797 |
| 8  | 112925984 | 112934869 | NM_011998    | chr8  | 112928758 | 112929749 |
| 6  | 112909774 | 112918691 | AF496547     | chr6  | 112913290 | 112913877 |
| 5  | 112659605 | 112668104 | AF220355     | chr5  | 112662049 | 112663178 |
| 11 | 112478266 | 112486765 | BC038907     | chr11 | 112485425 | 112486236 |
| 6  | 112419278 | 112427967 | NM_007617    | chr6  | 112423823 | 112424504 |
| 6  | 112351300 | 112359800 | NM_175525    | chr6  | 112351744 | 112352684 |
| 6  | 112233535 | 112242094 | NM_144799    | chr6  | 112240285 | 112241033 |
| 2  | 112174050 | 112182593 | NM_024254    | chr2  | 112176145 | 112176783 |
| 7  | 112159514 | 112168025 | BC031386     | chr7  | 112166939 | 112167637 |
| 2  | 112056808 | 112069652 | NM_133649    | chr2  | 112057046 | 112057752 |
| 2  | 112057611 | 112066130 | NM_172521    | chr2  | 112057046 | 112057752 |
| 7  | 112011037 | 112019570 | NM_177282    | chr7  | 112012638 | 112013412 |
| 8  | 111597773 | 111606272 | NM_007496    | chr8  | 111604590 | 111605496 |
| 4  | 110925160 | 110933659 | BC051512     | chr4  | 110925162 | 110926125 |
| 10 | 110871336 | 110887678 | NM_015781    | chr10 | 110887112 | 110887726 |
| 5  | 110849789 | 110858288 | NM_198306    | chr5  | 110851747 | 110852234 |
| 9  | 110683322 | 110705282 | NM_146227    | chr9  | 110689962 | 110690770 |
| 8  | 110475060 | 110483611 | NM_010817    | chr8  | 110476526 | 110477439 |
| 8  | 110149899 | 110158420 | BC093500     | chr8  | 110154761 | 110155496 |
| 10 | 110143575 | 110152077 | NM_178609    | chr10 | 110150282 | 110151263 |
| 11 | 110065319 | 110073818 | NM_147218    | chr11 | 110069556 | 110070163 |
| 11 | 109981744 | 109990243 | NM_147220    | chr11 | 109987647 | 109988199 |
| 11 | 109905211 | 109913710 | NM_153145    | chr11 | 109910737 | 109911374 |
| 4  | 109889723 | 109898222 | NM_001048189 | chr4  | 109893913 | 109894497 |
| 9  | 109891228 | 109899727 | BC042645     | chr9  | 109893105 | 109893563 |
| 4  | 109847342 | 109855841 | AF041341     | chr4  | 109849683 | 109850627 |
| 4  | 109782014 | 109791443 | NM_010488    | chr4  | 109790863 | 109791361 |
| 7  | 109749100 | 109757599 | NM_021494    | chr7  | 109753031 | 109754100 |
| 9  | 109668033 | 109676550 | NM_183136    | chr9  | 109672637 | 109673287 |
| 2  | 109518219 | 109526718 | BC034862     | chr2  | 109522525 | 109523695 |
| 7  | 109405246 | 109414324 | NM_001001326 | chr7  | 109407950 | 109408878 |
| 11 | 109353844 | 109362343 | BC039629     | chr11 | 109359610 | 109360132 |
| 9  | 109350761 | 109359260 | NM_177703    | chr9  | 109353432 | 109354473 |
| 9  | 109336701 | 109345200 | NM_177070    | chr9  | 109340518 | 109341165 |
| 9  | 109336701 | 109345200 | NM_177070    | chr9  | 109336860 | 109337844 |
| 11 | 109299970 | 109308469 | NM_028710    | chr11 | 109307450 | 109308298 |
| 8  | 109298468 | 109307009 | NM_011764    | chr8  | 109304814 | 109305484 |
| 11 | 109299970 | 109308469 | NM_028710    | chr11 | 109301441 | 109302175 |
| 8  | 109298468 | 109307009 | NM_011764    | chr8  | 109299624 | 109300256 |
| 11 | 109286800 | 109295686 | NM_001029842 | chr11 | 109293599 | 109294272 |
| 11 | 109236036 | 109244815 | NM_025275    | chr11 | 109241033 | 109241628 |
| 1  | 109183861 | 109199422 | NM_025867    | chr1  | 109188199 | 109188817 |
| 11 | 109111657 | 109120219 | NM_011268    | chr11 | 109112642 | 109113683 |

|    |           |           |              |       |           |           |
|----|-----------|-----------|--------------|-------|-----------|-----------|
| 9  | 109050869 | 109059381 | NM_177598    | chr9  | 109054687 | 109055709 |
| 5  | 109033166 | 109041665 | NM_026109    | chr5  | 109036485 | 109037460 |
| 8  | 108852736 | 108861235 | NM_009195    | chr8  | 108853310 | 108854117 |
| 7  | 108846502 | 108855001 | BC059258     | chr7  | 108851072 | 108851662 |
| 9  | 108837111 | 108851452 | NM_173019    | chr9  | 108840228 | 108840887 |
| 7  | 108796057 | 108811218 | NM_021885    | chr7  | 108804838 | 108805442 |
| 1  | 108768074 | 108776578 | BC062134     | chr1  | 108770388 | 108771204 |
| 7  | 108715824 | 108727335 | NM_175532    | chr7  | 108720460 | 108721508 |
| 7  | 108719593 | 108728092 | NM_025344    | chr7  | 108720460 | 108721508 |
| 7  | 108715824 | 108727335 | NM_175532    | chr7  | 108715820 | 108716464 |
| 5  | 108686679 | 108695193 | NM_172883    | chr5  | 108689850 | 108690690 |
| 7  | 108683083 | 108691597 | NM_207160    | chr7  | 108684612 | 108685432 |
| 7  | 108670282 | 108678781 | NM_146306    | chr7  | 108671664 | 108672641 |
| 7  | 108657830 | 108666386 | NM_001011846 | chr7  | 108659357 | 108660101 |
| 7  | 108657830 | 108666386 | NM_001011846 | chr7  | 108657442 | 108658207 |
| 7  | 108634686 | 108643185 | NM_146725    | chr7  | 108636129 | 108637101 |
| 5  | 108622675 | 108631174 | NM_008806    | chr5  | 108626306 | 108626941 |
| 5  | 108622675 | 108631174 | NM_008806    | chr5  | 108623895 | 108624919 |
| 3  | 108570705 | 108585711 | NM_011319    | chr3  | 108582011 | 108582627 |
| 3  | 108570705 | 108585711 | NM_011319    | chr3  | 108578444 | 108579230 |
| 7  | 108540035 | 108548534 | NM_146723    | chr7  | 108542428 | 108542995 |
| 1  | 108538227 | 108547849 | NM_009741    | chr1  | 108541669 | 108542504 |
| 7  | 108498497 | 108506996 | NM_146724    | chr7  | 108504677 | 108505431 |
| 12 | 108416933 | 108425432 | NM_176964    | chr12 | 108421310 | 108421910 |
| 12 | 108416933 | 108425432 | NM_176964    | chr12 | 108419279 | 108420001 |
| 7  | 108329704 | 108338203 | NM_001011527 | chr7  | 108331836 | 108332590 |
| 9  | 108307981 | 108316480 | BC048918     | chr9  | 108310532 | 108311149 |
| 7  | 108207750 | 108216249 | NM_146738    | chr7  | 108214017 | 108214829 |
| 6  | 108172895 | 108181394 | NM_010585    | chr6  | 108174313 | 108175199 |
| 6  | 108103777 | 108112283 | NM_018730    | chr6  | 108110890 | 108111549 |
| 3  | 108101665 | 108110164 | BC028749     | chr3  | 108105746 | 108106725 |
| 3  | 108069269 | 108077805 | NM_008184    | chr3  | 108069716 | 108070382 |
| 3  | 107999293 | 108007797 | NM_133867    | chr3  | 108006055 | 108007171 |
| 8  | 107928293 | 107940242 | BC057188     | chr8  | 107939502 | 107940028 |
| 4  | 107902146 | 107910646 | NM_024198    | chr4  | 107904726 | 107905662 |
| 8  | 107809399 | 107817919 | NM_172759    | chr8  | 107813059 | 107813616 |
| 14 | 107793591 | 107802090 | NM_199065    | chr14 | 107795468 | 107796135 |
| 8  | 107730197 | 107742350 | NM_145603    | chr8  | 107740667 | 107741727 |
| 3  | 107717087 | 107725586 | NM_007441    | chr3  | 107717124 | 107717732 |
| 9  | 107386046 | 107448373 | NM_008317    | chr9  | 107386679 | 107387331 |
| 3  | 107364209 | 107373763 | NM_001044382 | chr3  | 107366799 | 107367465 |
| 8  | 107239469 | 107247968 | BC022771     | chr8  | 107246639 | 107247497 |
| 1  | 107180202 | 107190217 | NM_178779    | chr1  | 107187485 | 107188261 |
| 8  | 106984815 | 106993327 | NM_009868    | chr8  | 106987152 | 106987568 |
| 7  | 106952167 | 106960666 | NM_001002894 | chr7  | 106958266 | 106959904 |
| 10 | 106887745 | 106896244 | NM_008656    | chr10 | 106894894 | 106895774 |
| 4  | 106745830 | 106754365 | NM_028394    | chr4  | 106746095 | 106746955 |

|    |           |           |              |       |           |           |
|----|-----------|-----------|--------------|-------|-----------|-----------|
| 7  | 106701849 | 106710348 | NM_001011542 | chr7  | 106707704 | 106708359 |
| 9  | 106674077 | 106682576 | NM_001015507 | chr9  | 106681612 | 106682222 |
| 7  | 106677965 | 106691756 | NM_146353    | chr7  | 106681383 | 106682046 |
| 3  | 106604506 | 106616605 | NM_028110    | chr3  | 106607753 | 106608252 |
| 7  | 106544536 | 106553035 | NM_146602    | chr7  | 106546235 | 106546898 |
| 10 | 106525239 | 106533778 | NM_198636    | chr10 | 106525513 | 106526178 |
| 7  | 106469634 | 106478133 | NM_146453    | chr7  | 106474775 | 106475605 |
| 9  | 106426569 | 106435097 | NM_026090    | chr9  | 106432272 | 106432754 |
| 9  | 106417227 | 106425732 | NM_026645    | chr9  | 106421521 | 106422198 |
| 4  | 106225838 | 106234346 | NM_146149    | chr4  | 106228525 | 106229216 |
| 4  | 106165975 | 106182838 | NM_028209    | chr4  | 106181387 | 106182287 |
| 3  | 106140203 | 106148702 | NM_029604    | chr3  | 106140511 | 106141102 |
| 11 | 106081213 | 106094798 | NM_031878    | chr11 | 106094270 | 106094833 |
| 11 | 106086762 | 106095337 | NM_029467    | chr11 | 106094270 | 106094833 |
| 3  | 106026477 | 106034976 | NM_009631    | chr3  | 106030783 | 106031394 |
| 3  | 105992914 | 106001462 | NM_027025    | chr3  | 105995455 | 105996135 |
| 3  | 105992914 | 106001462 | NM_027025    | chr3  | 105993234 | 105993846 |
| 12 | 105958222 | 105966721 | NM_009747    | chr12 | 105965907 | 105966706 |
| 4  | 105959762 | 105968261 | NM_153565    | chr4  | 105965547 | 105965990 |
| 11 | 105757738 | 105766277 | NM_007805    | chr11 | 105762840 | 105763652 |
| 11 | 105757738 | 105766277 | NM_007805    | chr11 | 105761236 | 105762196 |
| 2  | 105702840 | 105711339 | NM_023876    | chr2  | 105706213 | 105706804 |
| 7  | 105604473 | 105613434 | NM_010562    | chr7  | 105613170 | 105613781 |
| 7  | 105607813 | 105636302 | NM_009906    | chr7  | 105613170 | 105613781 |
| 12 | 105585910 | 105594594 | NM_013772    | chr12 | 105593899 | 105594482 |
| 12 | 105585910 | 105594594 | NM_013772    | chr12 | 105592180 | 105593636 |
| 7  | 105236051 | 105244550 | NM_146355    | chr7  | 105236753 | 105237190 |
| 7  | 105201530 | 105217535 | NM_147061    | chr7  | 105213385 | 105214155 |
| 7  | 105201530 | 105217535 | NM_147061    | chr7  | 105211446 | 105212220 |
| 2  | 105197579 | 105206158 | NM_009037    | chr2  | 105202309 | 105202902 |
| 7  | 105029041 | 105037540 | NM_207249    | chr7  | 105033063 | 105033654 |
| 7  | 105029041 | 105037540 | NM_207249    | chr7  | 105029587 | 105030271 |
| 7  | 104937290 | 104945789 | NM_146758    | chr7  | 104942781 | 104943726 |
| 7  | 104903021 | 104911520 | NM_147095    | chr7  | 104909247 | 104910023 |
| 11 | 104902311 | 104910810 | BC050801     | chr11 | 104903174 | 104903784 |
| 7  | 104806349 | 104814848 | NM_147043    | chr7  | 104811808 | 104812926 |
| 3  | 104761729 | 104770248 | NM_009196    | chr3  | 104767464 | 104768148 |
| 5  | 104669436 | 104678993 | NM_009263    | chr5  | 104677732 | 104678451 |
| 12 | 104609581 | 104620415 | NM_001033335 | chr12 | 104615970 | 104616649 |
| 4  | 104605302 | 104613801 | NM_178143    | chr4  | 104607416 | 104608152 |
| 5  | 104533599 | 104542106 | NM_008318    | chr5  | 104540845 | 104541714 |
| 7  | 104518627 | 104527126 | NM_147049    | chr7  | 104522441 | 104523270 |
| 12 | 104496163 | 104504699 | NM_172953    | chr12 | 104501546 | 104502261 |
| 4  | 104371816 | 104380330 | NM_146148    | chr4  | 104379533 | 104380147 |
| 4  | 104371816 | 104380330 | NM_146148    | chr4  | 104375194 | 104376690 |
| 5  | 104351489 | 104360035 | NM_010097    | chr5  | 104355957 | 104356778 |
| 5  | 104215167 | 104223666 | NM_198030    | chr5  | 104215802 | 104218192 |

|    |           |           |              |       |           |           |
|----|-----------|-----------|--------------|-------|-----------|-----------|
| 9  | 104193514 | 104202067 | NM_207668    | chr9  | 104196200 | 104197064 |
| 12 | 104166598 | 104182994 | NM_009246    | chr12 | 104172488 | 104173161 |
| 7  | 104036138 | 104044637 | NM_172905    | chr7  | 104039966 | 104040878 |
| 3  | 103983353 | 103991926 | NM_008979    | chr3  | 103988010 | 103988854 |
| 7  | 103956400 | 103964899 | NM_207144    | chr7  | 103960256 | 103960869 |
| 2  | 103917608 | 103926148 | NM_026634    | chr2  | 103919948 | 103920815 |
| 9  | 103916048 | 103924583 | NM_175324    | chr9  | 103919232 | 103919872 |
| 9  | 103918840 | 103927466 | NM_025692    | chr9  | 103919232 | 103919872 |
| 7  | 103893638 | 103902137 | NM_146822    | chr7  | 103900214 | 103900812 |
| 7  | 103884022 | 103892521 | NM_147084    | chr7  | 103885607 | 103886810 |
| 13 | 103807940 | 103816469 | NM_008533    | chr13 | 103812788 | 103813378 |
| 13 | 103807940 | 103816469 | NM_008533    | chr13 | 103808247 | 103809163 |
| 2  | 103765062 | 103773561 | NM_008505    | chr2  | 103770716 | 103771713 |
| 12 | 103640697 | 103649196 | NM_133364    | chr12 | 103647462 | 103648076 |
| 12 | 103640697 | 103649196 | NM_133364    | chr12 | 103644014 | 103644759 |
| 11 | 103563375 | 103571911 | NM_011719    | chr11 | 103566520 | 103567624 |
| 2  | 103361149 | 103369648 | NM_178890    | chr2  | 103362916 | 103363601 |
| 7  | 103314443 | 103322942 | NM_001011854 | chr7  | 103315847 | 103317252 |
| 12 | 103294356 | 103302855 | NM_001039049 | chr12 | 103300620 | 103301519 |
| 5  | 103276493 | 103284992 | AB005665     | chr5  | 103283983 | 103284661 |
| 7  | 103205877 | 103214376 | NM_146731    | chr7  | 103212539 | 103213134 |
| 7  | 103188222 | 103204808 | NM_001011793 | chr7  | 103194543 | 103195310 |
| 2  | 103101498 | 103110035 | NM_007914    | chr2  | 103107394 | 103108031 |
| 7  | 103079683 | 103096040 | NM_146380    | chr7  | 103090674 | 103091366 |
| 2  | 103082100 | 103090599 | AF035527     | chr2  | 103084035 | 103084702 |
| 11 | 103032009 | 103040522 | NM_177801    | chr11 | 103032022 | 103032475 |
| 3  | 102857590 | 102866330 | NM_027533    | chr3  | 102863625 | 102864242 |
| 7  | 102781159 | 102789658 | NM_147085    | chr7  | 102787818 | 102788443 |
| 7  | 102759473 | 102767972 | NM_147088    | chr7  | 102764795 | 102765520 |
| 7  | 102728593 | 102737092 | NM_001011536 | chr7  | 102733569 | 102734573 |
| 3  | 102632771 | 102641270 | BC011123     | chr3  | 102633516 | 102634489 |
| 7  | 102585733 | 102594232 | NM_147073    | chr7  | 102592425 | 102593192 |
| 2  | 102501277 | 102509787 | NM_011393    | chr2  | 102507506 | 102508627 |
| 4  | 102478305 | 102486813 | NM_026100    | chr4  | 102480604 | 102481445 |
| 7  | 102460063 | 102468562 | NM_146755    | chr7  | 102464458 | 102465347 |
| 15 | 102450956 | 102461919 | NM_146065    | chr15 | 102461198 | 102461676 |
| 15 | 102457013 | 102465543 | BC094645     | chr15 | 102461198 | 102461676 |
| 7  | 102446290 | 102454789 | NM_147104    | chr7  | 102452007 | 102452605 |
| 7  | 102422107 | 102430606 | NM_147101    | chr7  | 102421743 | 102422371 |
| 7  | 102402570 | 102418258 | NM_147079    | chr7  | 102406458 | 102407243 |
| 7  | 102402570 | 102418258 | NM_147079    | chr7  | 102403993 | 102405057 |
| 9  | 102356011 | 102364900 | NM_024291    | chr9  | 102360891 | 102361741 |
| 3  | 102209571 | 102218102 | NM_009814    | chr3  | 102216152 | 102216921 |
| 3  | 102133207 | 102141837 | NM_178777    | chr3  | 102136806 | 102137923 |
| 15 | 102071811 | 102091517 | NM_011244    | chr15 | 102084124 | 102084808 |
| 13 | 102044663 | 102053168 | BC012687     | chr13 | 102050078 | 102050751 |
| 7  | 101888942 | 101898511 | NM_010531    | chr7  | 101890626 | 101891397 |



|    |           |           |              |       |           |           |
|----|-----------|-----------|--------------|-------|-----------|-----------|
| 13 | 101763767 | 101772531 | NM_183115    | chr13 | 101769892 | 101770378 |
| 7  | 101728516 | 101750602 | NM_008034    | chr7  | 101746233 | 101746872 |
| 15 | 101695153 | 101703652 | NM_001003667 | chr15 | 101699069 | 101699927 |
| 15 | 101695153 | 101703652 | NM_001003667 | chr15 | 101696660 | 101697560 |
| 7  | 101658113 | 101666612 | BC092139     | chr7  | 101663949 | 101664548 |
| 15 | 101588972 | 101597471 | NM_001003669 | chr15 | 101595108 | 101595897 |
| 15 | 101568627 | 101577143 | NM_019956    | chr15 | 101575949 | 101576554 |
| 15 | 101519840 | 101528339 | NM_008476    | chr15 | 101524626 | 101525745 |
| 15 | 101519840 | 101528339 | NM_008476    | chr15 | 101522087 | 101522720 |
| 15 | 101376194 | 101384701 | NM_053249    | chr15 | 101380075 | 101380926 |
| 15 | 101316922 | 101325482 | NM_016879    | chr15 | 101322480 | 101323512 |
| 15 | 101316922 | 101325482 | NM_016879    | chr15 | 101321103 | 101321931 |
| 15 | 101295512 | 101304011 | NM_010667    | chr15 | 101300629 | 101301229 |
| 15 | 101295512 | 101304011 | NM_010667    | chr15 | 101297822 | 101298516 |
| 12 | 101286401 | 101294931 | NM_175493    | chr12 | 101286795 | 101287979 |
| 15 | 101195660 | 101204198 | BC120601     | chr15 | 101201141 | 101201776 |
| 12 | 101174156 | 101189691 | NM_145448    | chr12 | 101187756 | 101188807 |
| 6  | 101132815 | 101141314 | BC010329     | chr6  | 101138481 | 101139113 |
| 6  | 101132815 | 101141314 | BC010329     | chr6  | 101137228 | 101137903 |
| 6  | 101132815 | 101141314 | BC010329     | chr6  | 101134945 | 101135523 |
| 13 | 101113332 | 101121896 | NM_030026    | chr13 | 101114579 | 101115195 |
| 5  | 101080531 | 101089097 | NM_172715    | chr5  | 101086236 | 101086943 |
| 4  | 100988611 | 100997110 | BC064460     | chr4  | 100991452 | 100992059 |
| 4  | 100988611 | 100997110 | BC064460     | chr4  | 100989305 | 100990128 |
| 15 | 100950556 | 100959459 | NM_009612    | chr15 | 100950566 | 100951221 |
| 11 | 100669493 | 100679136 | NM_011488    | chr11 | 100673202 | 100673803 |
| 6  | 100564771 | 100573274 | BC094903     | chr6  | 100570270 | 100571439 |
| 7  | 100341073 | 100356010 | NM_009464    | chr7  | 100354751 | 100355334 |
| 13 | 100278980 | 100287479 | NM_001004149 | chr13 | 100279273 | 100280241 |
| 15 | 100119145 | 100135359 | NM_027334    | chr15 | 100119232 | 100120019 |
| 7  | 100046780 | 100057748 | NM_020574    | chr7  | 100054641 | 100055842 |
| 11 | 100006837 | 100015336 | NM_201255    | chr11 | 100011950 | 100013061 |
| 3  | 100008493 | 100016992 | NM_028892    | chr3  | 100008628 | 100009226 |
| 11 | 100006837 | 100015336 | NM_201255    | chr11 | 100008400 | 100009183 |
| 7  | 99993084  | 100001586 | NM_133692    | chr7  | 100000623 | 100001511 |
| 11 | 99935101  | 99943656  | NM_010662    | chr11 | 99941736  | 99942334  |
| 11 | 99901704  | 99918315  | NM_016880    | chr11 | 99915210  | 99915922  |
| 11 | 99901704  | 99918315  | NM_016880    | chr11 | 99906563  | 99907215  |
| 11 | 99901704  | 99918315  | NM_016880    | chr11 | 99905779  | 99906408  |
| 11 | 99855123  | 99863644  | NM_027563    | chr11 | 99857813  | 99858421  |
| 6  | 99841357  | 99849856  | BC092381     | chr6  | 99847876  | 99848370  |
| 11 | 99829786  | 99838302  | NM_027983    | chr11 | 99834665  | 99835417  |
| 15 | 99794903  | 99803402  | BC075726     | chr15 | 99801959  | 99802620  |
| 11 | 99718010  | 99733373  | NM_027568    | chr11 | 99729633  | 99730219  |
| 7  | 99635247  | 99643746  | NM_146356    | chr7  | 99636994  | 99637597  |
| 7  | 99635247  | 99643746  | NM_146356    | chr7  | 99635510  | 99636053  |
| 15 | 99597959  | 99606549  | NM_028015    | chr15 | 99599106  | 99599810  |

|   |    |          |          |              |       |          |          |
|---|----|----------|----------|--------------|-------|----------|----------|
| X |    | 99553222 | 99561774 | NM_009767    | chrX  | 99560734 | 99561678 |
|   | 11 | 99457655 | 99472271 | NM_029613    | chr11 | 99470923 | 99471513 |
|   | 11 | 99457655 | 99472271 | NM_029613    | chr11 | 99457683 | 99458243 |
|   | 11 | 99394607 | 99457174 | NM_001039502 | chr11 | 99436138 | 99437122 |
|   | 9  | 99416796 | 99425295 | NM_001077424 | chr9  | 99423311 | 99424391 |
|   | 11 | 99394607 | 99457174 | NM_001039502 | chr11 | 99419437 | 99420048 |
| X |    | 99386585 | 99395359 | NM_008671    | chrX  | 99389574 | 99390278 |
|   | 11 | 99334849 | 99343348 | NM_213730    | chr11 | 99336780 | 99337541 |
|   | 11 | 99306695 | 99315214 | NM_033373    | chr11 | 99312577 | 99313416 |
|   | 11 | 99306695 | 99315214 | NM_033373    | chr11 | 99310526 | 99312125 |
|   | 11 | 99306695 | 99315214 | NM_033373    | chr11 | 99309164 | 99309931 |
|   | 11 | 99164685 | 99173194 | NM_010666    | chr11 | 99164959 | 99165646 |
|   | 11 | 99151545 | 99160057 | NM_001033397 | chr11 | 99152496 | 99152905 |
| X |    | 99108907 | 99117406 | NM_027591    | chrX  | 99112339 | 99113044 |
|   | 5  | 99088741 | 99097627 | NM_173404    | chr5  | 99094258 | 99094853 |
|   | 15 | 99046986 | 99055485 | NM_010601    | chr15 | 99047098 | 99047697 |
| X |    | 98999682 | 99009451 | BC116811     | chrX  | 99002976 | 99003889 |
| X |    | 98999682 | 99009451 | BC116811     | chrX  | 99000990 | 99002960 |
|   | 3  | 98984756 | 98994855 | NM_008293    | chr3  | 98990130 | 98990476 |
|   | 3  | 98984756 | 98994855 | NM_008293    | chr3  | 98988703 | 98989615 |
|   | 12 | 98976491 | 98984990 | NM_029911    | chr12 | 98976400 | 98977137 |
|   | 11 | 98968660 | 98977167 | NM_007719    | chr11 | 98968667 | 98969767 |
|   | 3  | 98937670 | 98949498 | NM_013821    | chr3  | 98948527 | 98949163 |
|   | 3  | 98937670 | 98949498 | NM_013821    | chr3  | 98944159 | 98944945 |
|   | 3  | 98937670 | 98949498 | NM_013821    | chr3  | 98939708 | 98940292 |
| X |    | 98904623 | 98916395 | NM_001039116 | chrX  | 98915127 | 98916080 |
|   | 9  | 98842543 | 98851042 | BC115956     | chr9  | 98845314 | 98846201 |
|   | 15 | 98759922 | 98768458 | NM_011654    | chr15 | 98765000 | 98765619 |
|   | 11 | 98673899 | 98682398 | NM_197940    | chr11 | 98678802 | 98679761 |
|   | 12 | 98663707 | 98678575 | NM_008152    | chr12 | 98677355 | 98677928 |
|   | 11 | 98605606 | 98628423 | NM_138660    | chr11 | 98612696 | 98613499 |
|   | 11 | 98588413 | 98597332 | NM_145434    | chr11 | 98596319 | 98596761 |
|   | 13 | 98588956 | 98597455 | BC054101     | chr13 | 98591547 | 98592372 |
|   | 5  | 98563606 | 98572105 | NM_001024614 | chr5  | 98568884 | 98570006 |
|   | 15 | 98502993 | 98511495 | NM_172612    | chr15 | 98505301 | 98505912 |
|   | 8  | 98417229 | 98425730 | NM_172914    | chr8  | 98425014 | 98425707 |
|   | 15 | 98308218 | 98316717 | NM_010679    | chr15 | 98311597 | 98312204 |
|   | 11 | 98256924 | 98265680 | NM_010346    | chr11 | 98264203 | 98264820 |
|   | 14 | 98175825 | 98184787 | NM_009769    | chr14 | 98184368 | 98184748 |
|   | 15 | 98082814 | 98091336 | NM_027304    | chr15 | 98085337 | 98085981 |
|   | 16 | 98075014 | 98083537 | NM_174847    | chr16 | 98081683 | 98082357 |
|   | 11 | 98013404 | 98021911 | NM_026952    | chr11 | 98018709 | 98019494 |
|   | 14 | 97980375 | 97988874 | NM_028315    | chr14 | 97985935 | 97986691 |
|   | 16 | 97952217 | 97960717 | BC046433     | chr16 | 97952712 | 97953323 |
|   | 8  | 97938232 | 97947628 | NM_001042715 | chr8  | 97942153 | 97942693 |
|   | 8  | 97860238 | 97876231 | NM_018882    | chr8  | 97871404 | 97872254 |
|   | 8  | 97860238 | 97876231 | NM_018882    | chr8  | 97862287 | 97863069 |

|   |    |          |                       |       |          |          |
|---|----|----------|-----------------------|-------|----------|----------|
|   | 9  | 97840020 | 97848519 NM_022319    | chr9  | 97846515 | 97847288 |
|   | 7  | 97789147 | 97797646 NM_177696    | chr7  | 97794346 | 97794949 |
|   | 3  | 97708280 | 97716954 NM_010232    | chr3  | 97710406 | 97710913 |
|   | 15 | 97593201 | 97601706 NM_144850    | chr15 | 97600669 | 97601354 |
| X |    | 97574056 | 97589368 NM_008124    | chrX  | 97579858 | 97580866 |
|   | 16 | 97563358 | 97573815 NM_010846    | chr16 | 97572226 | 97572971 |
| X |    | 97495929 | 97504428 NM_172932    | chrX  | 97498085 | 97498649 |
|   | 3  | 97494085 | 97502584 NM_146275    | chr3  | 97496343 | 97497102 |
|   | 16 | 97455672 | 97464186 NM_019517    | chr16 | 97457748 | 97458332 |
|   | 8  | 97207440 | 97220854 NM_019415    | chr8  | 97214278 | 97215095 |
|   | 13 | 97179542 | 97195573 BC058282     | chr13 | 97191405 | 97192041 |
|   | 15 | 97183047 | 97191546 BC038822     | chr15 | 97184777 | 97185427 |
|   | 9  | 97176798 | 97185310 NM_030219    | chr9  | 97179303 | 97179935 |
|   | 14 | 97050161 | 97058677 NM_007826    | chr14 | 97053976 | 97054581 |
|   | 10 | 96989491 | 96998017 NM_008524    | chr10 | 96990073 | 96990964 |
|   | 3  | 96909531 | 96918030 NM_021517    | chr3  | 96916918 | 96917797 |
|   | 3  | 96909531 | 96918030 NM_021517    | chr3  | 96913325 | 96913975 |
|   | 10 | 96906055 | 96914554 NM_007833    | chr10 | 96905282 | 96906155 |
|   | 15 | 96856695 | 96865245 AB055004     | chr15 | 96860408 | 96861098 |
|   | 15 | 96856695 | 96865245 AB055004     | chr15 | 96859148 | 96859930 |
|   | 11 | 96823659 | 96832158 NM_031183    | chr11 | 96825802 | 96826877 |
|   | 11 | 96739392 | 96747983 NM_146026    | chr11 | 96743935 | 96744900 |
| X |    | 96691064 | 96699563 NM_008784    | chrX  | 96698063 | 96698708 |
|   | 13 | 96623408 | 96631917 NM_007974    | chr13 | 96629644 | 96630453 |
|   | 16 | 96379942 | 96388441 NM_033149    | chr16 | 96386536 | 96387215 |
|   | 3  | 96376875 | 96385374 NM_010186    | chr3  | 96383800 | 96384411 |
|   | 3  | 96241442 | 96249941 NM_181409    | chr3  | 96246173 | 96247296 |
|   | 3  | 96183932 | 96192431 NM_001025613 | chr3  | 96189709 | 96190538 |
|   | 12 | 96168509 | 96177008 AY495669     | chr12 | 96174669 | 96175429 |
|   | 8  | 96166340 | 96174839 NM_144930    | chr8  | 96166678 | 96167259 |
|   | 3  | 95987527 | 95996044 NM_011797    | chr3  | 95991100 | 95991779 |
|   | 1  | 95844899 | 95853398 NM_173772    | chr1  | 95851311 | 95851965 |
|   | 8  | 95843207 | 95852857 NM_009209    | chr8  | 95848297 | 95849142 |
|   | 16 | 95805284 | 95813843 NM_011809    | chr16 | 95810224 | 95810834 |
|   | 15 | 95480306 | 95488805 NM_207533    | chr15 | 95487723 | 95488362 |
|   | 15 | 95480306 | 95488805 NM_207533    | chr15 | 95485456 | 95486071 |
|   | 3  | 95389699 | 95399613 NM_023628    | chr3  | 95391913 | 95392516 |
|   | 10 | 95364351 | 95372937 NM_001001932 | chr10 | 95368483 | 95369461 |
|   | 16 | 95360449 | 95368995 NM_019664    | chr16 | 95367353 | 95368156 |
|   | 9  | 95363169 | 95371668 NM_198414    | chr9  | 95363181 | 95364193 |
|   | 15 | 95353557 | 95362739 NM_016743    | chr15 | 95354148 | 95354853 |
|   | 6  | 95077422 | 95086491 NM_001008785 | chr6  | 95083216 | 95083811 |
|   | 1  | 94988855 | 94997354 NM_172411    | chr1  | 94994838 | 94995344 |
|   | 16 | 94962971 | 94971488 NM_001025590 | chr16 | 94970367 | 94971046 |
|   | 11 | 94959854 | 94968353 NM_007867    | chr11 | 94967092 | 94967553 |
|   | 1  | 94959651 | 94968181 NM_016702    | chr1  | 94959786 | 94960164 |
|   | 6  | 94663109 | 94671608 NM_008377    | chr6  | 94670563 | 94671160 |

|   |    |          |          |           |       |          |          |
|---|----|----------|----------|-----------|-------|----------|----------|
|   | 1  | 94656092 | 94664762 | NM_016696 | chr1  | 94656678 | 94657315 |
|   | 16 | 94486710 | 94495209 | NM_009441 | chr16 | 94487608 | 94488274 |
|   | 3  | 94478623 | 94487212 | NM_177250 | chr3  | 94486597 | 94487199 |
|   | 3  | 94478623 | 94487212 | NM_177250 | chr3  | 94483746 | 94484526 |
|   | 16 | 94476519 | 94485813 | NM_019543 | chr16 | 94482370 | 94482900 |
|   | 6  | 94459811 | 94468315 | NM_026255 | chr6  | 94465451 | 94466065 |
|   | 1  | 94444287 | 94452786 | NM_206896 | chr1  | 94447185 | 94447790 |
|   | 1  | 94432245 | 94440744 | NM_146491 | chr1  | 94438604 | 94439597 |
|   | 1  | 94432245 | 94440744 | NM_146491 | chr1  | 94435418 | 94436306 |
|   | 1  | 94432245 | 94440744 | NM_146491 | chr1  | 94434020 | 94434662 |
|   | 1  | 94432245 | 94440744 | NM_146491 | chr1  | 94432244 | 94432937 |
|   | 1  | 94412738 | 94429426 | NM_146490 | chr1  | 94419680 | 94420384 |
|   | 13 | 94399248 | 94411286 | NM_152134 | chr13 | 94406941 | 94407610 |
|   | 1  | 94397531 | 94406030 | NM_147037 | chr1  | 94401590 | 94402209 |
|   | 1  | 94339970 | 94348469 | NM_147039 | chr1  | 94340444 | 94341062 |
|   | 5  | 94117656 | 94126155 | NM_175270 | chr5  | 94123926 | 94124609 |
|   | 16 | 93894878 | 93903377 | NM_019500 | chr16 | 93894874 | 93895917 |
|   | 3  | 93473103 | 93481602 | NM_009100 | chr3  | 93479270 | 93480076 |
|   | 5  | 93400768 | 93409317 | NM_008599 | chr5  | 93401674 | 93402709 |
|   | 5  | 93328979 | 93337478 | NM_011148 | chr5  | 93334169 | 93334766 |
|   | 8  | 93235584 | 93244637 | NM_172913 | chr8  | 93242845 | 93243453 |
|   | 15 | 93220538 | 93229076 | NM_146062 | chr15 | 93226645 | 93227040 |
|   | 15 | 93223954 | 93232502 | NM_026025 | chr15 | 93226645 | 93227040 |
|   | 1  | 93175479 | 93186509 | NM_027551 | chr1  | 93180526 | 93181136 |
|   | 2  | 93132790 | 93141346 | NM_183180 | chr2  | 93139672 | 93140280 |
|   | 3  | 93098569 | 93110463 | NM_025420 | chr3  | 93105104 | 93105885 |
|   | 3  | 93098569 | 93110463 | NM_025420 | chr3  | 93102361 | 93102966 |
|   | 3  | 93098569 | 93110463 | NM_025420 | chr3  | 93101205 | 93102061 |
|   | 10 | 93065000 | 93073665 | NM_021320 | chr10 | 93065993 | 93066749 |
|   | 1  | 93004229 | 93012980 | NM_016894 | chr1  | 93007252 | 93007925 |
|   | 11 | 92908500 | 92918687 | NM_028296 | chr11 | 92916367 | 92916986 |
| X |    | 92910160 | 92918823 | NM_029536 | chrX  | 92911491 | 92912080 |
|   | 3  | 92758650 | 92767149 | NM_028622 | chr3  | 92764110 | 92764734 |
|   | 16 | 92712052 | 92720551 | BC069929  | chr16 | 92718378 | 92719077 |
|   | 16 | 92712052 | 92720551 | BC069929  | chr16 | 92715197 | 92715971 |
|   | 3  | 92655684 | 92665118 | NM_008412 | chr3  | 92663496 | 92664100 |
|   | 3  | 92583397 | 92591896 | NM_173070 | chr3  | 92590293 | 92590963 |
|   | 3  | 92497485 | 92506013 | AY158994  | chr3  | 92501883 | 92502976 |
|   | 5  | 92475520 | 92484113 | NM_007568 | chr5  | 92475518 | 92476369 |
|   | 3  | 92453318 | 92461817 | NM_011473 | chr3  | 92457413 | 92458261 |
|   | 16 | 92380993 | 92389505 | NM_172469 | chr16 | 92388436 | 92389158 |
|   | 13 | 92348625 | 92357124 | NM_198415 | chr13 | 92351826 | 92352560 |
|   | 9  | 92340173 | 92348672 | NM_011961 | chr9  | 92342051 | 92342643 |
| X |    | 92292764 | 92301281 | NM_010833 | chrX  | 92294520 | 92295202 |
|   | 13 | 92209757 | 92218259 | NM_028790 | chr13 | 92215814 | 92217316 |
|   | 5  | 92208799 | 92217487 | NM_009704 | chr5  | 92210602 | 92211277 |
|   | 8  | 92075174 | 92083673 | BC098233  | chr8  | 92082378 | 92083057 |

|    |          |          |           |       |          |          |
|----|----------|----------|-----------|-------|----------|----------|
| 9  | 92073491 | 92082106 | NM_008880 | chr9  | 92073718 | 92074281 |
| 6  | 91938382 | 91955113 | NM_172731 | chr6  | 91948114 | 91949084 |
| 12 | 91800567 | 91809120 | NM_011648 | chr12 | 91805481 | 91806076 |
| 5  | 91713164 | 91721687 | NM_028478 | chr5  | 91719576 | 91720625 |
| 13 | 91680174 | 91688673 | BC023455  | chr13 | 91687236 | 91687976 |
| 13 | 91680174 | 91688673 | BC023455  | chr13 | 91685539 | 91686148 |
| 6  | 91643599 | 91652145 | NM_009320 | chr6  | 91644908 | 91645523 |
| 11 | 91391122 | 91399645 | NM_028547 | chr11 | 91394452 | 91394918 |
| 16 | 91255758 | 91264386 | NM_010509 | chr16 | 91255704 | 91256396 |
| 9  | 91160877 | 91169376 | NM_009576 | chr9  | 91167189 | 91167802 |
| 9  | 91160951 | 91169704 | NM_009573 | chr9  | 91167189 | 91167802 |
| 6  | 91079824 | 91088330 | NM_018815 | chr6  | 91082016 | 91082633 |
| 1  | 90932457 | 90940956 | BC034733  | chr1  | 90933509 | 90934304 |
| 2  | 90891636 | 90900238 | NM_011355 | chr2  | 90899847 | 90900192 |
| 8  | 90847100 | 90855700 | NM_033327 | chr8  | 90853751 | 90854376 |
| 3  | 90806838 | 90815337 | NM_207263 | chr3  | 90814687 | 90815299 |
| 3  | 90806838 | 90815337 | NM_207263 | chr3  | 90811348 | 90812012 |
| 8  | 90783341 | 90791840 | AY147407  | chr8  | 90789309 | 90789687 |
| 8  | 90746919 | 90755418 | AF188609  | chr8  | 90750408 | 90751343 |
| 5  | 90596628 | 90605127 | NM_133192 | chr5  | 90600410 | 90601572 |
| 3  | 90548942 | 90558265 | NM_008727 | chr3  | 90555375 | 90555749 |
| 5  | 90530461 | 90538964 | NM_008096 | chr5  | 90535319 | 90535931 |
| 6  | 90391437 | 90400291 | BC047211  | chr6  | 90399054 | 90399890 |
| 6  | 90372522 | 90381021 | BC079632  | chr6  | 90379939 | 90380546 |
| 6  | 90372522 | 90381021 | BC079632  | chr6  | 90374623 | 90375402 |
| 6  | 90292810 | 90301309 | NM_144940 | chr6  | 90300506 | 90301190 |
| 2  | 90195502 | 90204001 | NM_146333 | chr2  | 90201571 | 90202268 |
| 6  | 90187443 | 90195942 | NM_053226 | chr6  | 90189284 | 90190213 |
| 6  | 90162321 | 90170820 | NM_053223 | chr6  | 90162873 | 90163562 |
| 1  | 90128453 | 90140382 | NM_134252 | chr1  | 90130760 | 90131310 |
| 6  | 90066779 | 90075278 | NM_053225 | chr6  | 90072524 | 90073123 |
| 6  | 90066779 | 90075278 | NM_053225 | chr6  | 90069087 | 90070223 |
| 2  | 90064768 | 90073267 | NM_146793 | chr2  | 90068895 | 90069688 |
| 11 | 90059566 | 90068225 | NM_026178 | chr11 | 90065136 | 90065725 |
| 2  | 90051326 | 90059825 | NM_146984 | chr2  | 90055336 | 90056143 |
| 6  | 90036023 | 90044522 | NM_011911 | chr6  | 90037842 | 90038893 |
| 13 | 90008000 | 90017492 | NM_013500 | chr13 | 90008220 | 90008877 |
| 3  | 89996590 | 90005089 | NM_010559 | chr3  | 90004170 | 90004962 |
| 10 | 89999526 | 90009385 | BC098373  | chr10 | 90002421 | 90003268 |
| 1  | 89959980 | 89972048 | NM_145079 | chr1  | 89959991 | 89960889 |
| 6  | 89935675 | 89944174 | NM_053229 | chr6  | 89941686 | 89942769 |
| 2  | 89937535 | 89946034 | NM_010980 | chr2  | 89939414 | 89940186 |
| 1  | 89920249 | 89940532 | NM_201642 | chr1  | 89929377 | 89930191 |
| 1  | 89880582 | 89889122 | NM_201641 | chr1  | 89887519 | 89888260 |
| X  | 89882352 | 89890874 | NM_008892 | chrX  | 89882766 | 89883633 |
| 2  | 89850662 | 89859161 | NM_020515 | chr2  | 89856707 | 89857240 |
| 16 | 89847187 | 89855686 | NM_009384 | chr16 | 89852316 | 89853519 |

|    |          |          |              |       |          |          |
|----|----------|----------|--------------|-------|----------|----------|
| 3  | 89847854 | 89856512 | NM_009602    | chr3  | 89847873 | 89848451 |
| 6  | 89833534 | 89842033 | NM_053220    | chr6  | 89840730 | 89841437 |
| 2  | 89809730 | 89818229 | NM_146794    | chr2  | 89810770 | 89811864 |
| 6  | 89808620 | 89817119 | NM_053221    | chr6  | 89810090 | 89811211 |
| 6  | 89705928 | 89714485 | NM_053230    | chr6  | 89713545 | 89714202 |
| 6  | 89705928 | 89714485 | NM_053230    | chr6  | 89711742 | 89712684 |
| 6  | 89705928 | 89714485 | NM_053230    | chr6  | 89708189 | 89708886 |
| 5  | 89599862 | 89608362 | NM_152839    | chr5  | 89605580 | 89606382 |
| 3  | 89600348 | 89608848 | NM_080466    | chr3  | 89600587 | 89601179 |
| 3  | 89448667 | 89457166 | NM_029974    | chr3  | 89454067 | 89455056 |
| 1  | 89419721 | 89428220 | NM_015750    | chr1  | 89421693 | 89422387 |
| 1  | 89402542 | 89411041 | BC039279     | chr1  | 89403514 | 89404278 |
| 18 | 89325620 | 89334287 | NM_178687    | chr18 | 89332715 | 89333438 |
| 18 | 89325620 | 89334287 | NM_178687    | chr18 | 89331349 | 89331935 |
| 1  | 89311385 | 89319884 | BC022680     | chr1  | 89319086 | 89319682 |
| 1  | 89311385 | 89319884 | BC022680     | chr1  | 89315223 | 89316086 |
| 12 | 89302456 | 89310955 | BC060719     | chr12 | 89306368 | 89307366 |
| 12 | 89302456 | 89310955 | BC060719     | chr12 | 89302451 | 89303030 |
| 16 | 89290128 | 89298663 | NM_028621    | chr16 | 89294345 | 89295190 |
| 11 | 89232539 | 89241038 | NM_172534    | chr11 | 89236898 | 89237500 |
| 6  | 89179221 | 89187720 | NM_201356    | chr6  | 89187253 | 89187667 |
| 6  | 89179221 | 89187720 | NM_201356    | chr6  | 89179838 | 89180449 |
| 17 | 89106502 | 89115001 | NM_013523    | chr17 | 89113584 | 89114219 |
| 1  | 89089534 | 89098049 | NM_028889    | chr1  | 89097050 | 89098022 |
| 5  | 88994168 | 89002708 | NM_007786    | chr5  | 88998372 | 88998957 |
| 9  | 88991102 | 88999688 | NM_007534    | chr9  | 88995847 | 88996517 |
| 15 | 88803820 | 88812773 | NM_133241    | chr15 | 88812712 | 88813539 |
| 15 | 88807324 | 88815823 | NM_031260    | chr15 | 88812712 | 88813539 |
| 15 | 88803820 | 88812773 | NM_133241    | chr15 | 88808967 | 88809585 |
| 15 | 88807324 | 88815823 | NM_031260    | chr15 | 88808967 | 88809585 |
| 16 | 88782809 | 88791309 | NM_010676    | chr16 | 88790414 | 88791046 |
| 3  | 88736570 | 88745069 | NM_181817    | chr3  | 88741392 | 88742009 |
| 3  | 88701065 | 88709611 | NM_008487    | chr3  | 88702210 | 88703127 |
| 15 | 88573477 | 88585030 | NM_181412    | chr15 | 88583932 | 88584636 |
| 2  | 88566653 | 88575152 | NM_001005227 | chr2  | 88567844 | 88568591 |
| 12 | 88274802 | 88283344 | NM_011479    | chr12 | 88280302 | 88280948 |
| 2  | 88256181 | 88264680 | NM_146529    | chr2  | 88259760 | 88260535 |
| 8  | 88252930 | 88261429 | NM_175441    | chr8  | 88254142 | 88254773 |
| 4  | 88145588 | 88168499 | NM_008336    | chr4  | 88164846 | 88165534 |
| 7  | 88147327 | 88155851 | NM_009982    | chr7  | 88148169 | 88148966 |
| 10 | 88107875 | 88118821 | NM_011461    | chr10 | 88112333 | 88112967 |
| 12 | 88086833 | 88095332 | NM_001033475 | chr12 | 88088999 | 88090162 |
| 4  | 88061117 | 88080607 | NM_177361    | chr4  | 88070782 | 88071413 |
|    | 88033196 | 88041737 | BC116773     | chrX  | 88039658 | 88040073 |
| 4  | 88026977 | 88035476 | NM_206870    | chr4  | 88029549 | 88030100 |
| 1  | 87998811 | 88007310 | BC028964     | chr1  | 88005834 | 88006791 |
| 10 | 87931218 | 87939724 | NM_144807    | chr10 | 87937786 | 87938571 |

|    |          |          |              |       |          |          |
|----|----------|----------|--------------|-------|----------|----------|
| 3  | 87926682 | 87935471 | NM_001025571 | chr3  | 87931736 | 87932686 |
| 18 | 87884543 | 87893042 | AF033381     | chr18 | 87891362 | 87891952 |
| 1  | 87847114 | 87855631 | NM_027300    | chr1  | 87848734 | 87849393 |
| 5  | 87817869 | 87826376 | NM_172880    | chr5  | 87823777 | 87824390 |
| 5  | 87743975 | 87756911 | NM_177024    | chr5  | 87752197 | 87752786 |
| 11 | 87728699 | 87737198 | NM_146412    | chr11 | 87730802 | 87731686 |
| 1  | 87719736 | 87728302 | NM_022417    | chr1  | 87727063 | 87728245 |
| 11 | 87703590 | 87716117 | NM_146413    | chr11 | 87706974 | 87707793 |
| 11 | 87703590 | 87716117 | NM_146413    | chr11 | 87703642 | 87704238 |
| 11 | 87639806 | 87648310 | NM_080420    | chr11 | 87639817 | 87640399 |
| 5  | 87629108 | 87637615 | NM_178730    | chr5  | 87630126 | 87630741 |
| 12 | 87613073 | 87621574 | NM_144524    | chr12 | 87619726 | 87620407 |
| 11 | 87586326 | 87595787 | NM_172449    | chr11 | 87594517 | 87595634 |
| 16 | 87582145 | 87590649 | NM_007520    | chr16 | 87587610 | 87588189 |
| 16 | 87582145 | 87590649 | NM_007520    | chr16 | 87582620 | 87583223 |
| 1  | 87565237 | 87573747 | BC052931     | chr1  | 87571965 | 87572812 |
| 12 | 87561803 | 87571802 | NM_177354    | chr12 | 87562543 | 87563181 |
| 6  | 87496377 | 87504876 | NM_001037727 | chr6  | 87498937 | 87499557 |
| 6  | 87459442 | 87467941 | NM_175476    | chr6  | 87466782 | 87467888 |
| 5  | 87399798 | 87408297 | AF539752     | chr5  | 87405298 | 87406081 |
| 6  | 87388674 | 87397173 | NM_009756    | chr6  | 87392468 | 87393484 |
| 6  | 87352070 | 87360569 | NM_026860    | chr6  | 87358629 | 87359303 |
| 3  | 87346953 | 87355520 | NM_030707    | chr3  | 87354978 | 87355480 |
| 6  | 87332991 | 87341509 | NM_025467    | chr6  | 87340099 | 87340697 |
| 6  | 87332991 | 87341509 | NM_025467    | chr6  | 87338962 | 87340010 |
| 6  | 87332991 | 87341509 | NM_025467    | chr6  | 87336362 | 87337023 |
| 2  | 87303297 | 87311796 | NM_178249    | chr2  | 87310797 | 87311402 |
| 6  | 87298850 | 87307354 | NM_054041    | chr6  | 87303847 | 87304396 |
| 5  | 87269908 | 87278431 | NM_010323    | chr5  | 87274019 | 87274821 |
| 3  | 87257978 | 87266477 | BC023765     | chr3  | 87262397 | 87263355 |
| 12 | 87244220 | 87252719 | NM_011934    | chr12 | 87250997 | 87251600 |
| 12 | 87244220 | 87252719 | NM_011934    | chr12 | 87245766 | 87246739 |
| 17 | 87185212 | 87194034 | NM_028639    | chr17 | 87191416 | 87192199 |
| 17 | 87185212 | 87194034 | NM_028639    | chr17 | 87187798 | 87188457 |
| 5  | 87137533 | 87146032 | NM_007683    | chr5  | 87144004 | 87144458 |
| 5  | 87140335 | 87148888 | NM_019992    | chr5  | 87144004 | 87144458 |
| 3  | 87082732 | 87091264 | NM_007639    | chr3  | 87085605 | 87086557 |
| 8  | 87024394 | 87043858 | NM_145970    | chr8  | 87037541 | 87038136 |
| 8  | 87032264 | 87040763 | NM_029045    | chr8  | 87037541 | 87038136 |
| 17 | 86850897 | 86862213 | NM_029121    | chr17 | 86850959 | 86851921 |
| 6  | 86756691 | 86765190 | NM_013471    | chr6  | 86757825 | 86758427 |
| 2  | 86721870 | 86730369 | NM_146845    | chr2  | 86728637 | 86729227 |
| 7  | 86649070 | 86657593 | NM_016770    | chr7  | 86652107 | 86652746 |
| 6  | 86587808 | 86596307 | DQ841260     | chr6  | 86595410 | 86596051 |
| 9  | 86490414 | 86498945 | NM_008615    | chr9  | 86493725 | 86494364 |
| 2  | 86456796 | 86465295 | NM_146590    | chr2  | 86457048 | 86457630 |
| 8  | 86425198 | 86433697 | NM_146270    | chr8  | 86425465 | 86426162 |

|    |          |          |              |       |          |          |
|----|----------|----------|--------------|-------|----------|----------|
| 7  | 86259920 | 86268419 | NM_001011828 | chr7  | 86261628 | 86262291 |
| 6  | 86222834 | 86231333 | BC031432     | chr6  | 86230164 | 86230762 |
| 6  | 86222834 | 86231333 | BC031432     | chr6  | 86228945 | 86229320 |
| 2  | 86212390 | 86220889 | NM_207134    | chr2  | 86212985 | 86213672 |
| 7  | 86195312 | 86203811 | NM_146621    | chr7  | 86201763 | 86202313 |
| 3  | 86165250 | 86173749 | BC031117     | chr3  | 86172707 | 86173174 |
| 3  | 86085919 | 86094418 | NM_001001650 | chr3  | 86086870 | 86087611 |
| 15 | 86036225 | 86044724 | NM_145476    | chr15 | 86042535 | 86043179 |
| 6  | 85988381 | 85996880 | BC053032     | chr6  | 85995531 | 85996566 |
| 6  | 85988381 | 85996880 | BC053032     | chr6  | 85992026 | 85992689 |
| 17 | 85946258 | 85954757 | NM_030133    | chr17 | 85947971 | 85949647 |
| 6  | 85868019 | 85876518 | NM_029331    | chr6  | 85873495 | 85874425 |
| 6  | 85794994 | 85803740 | NM_023455    | chr6  | 85801344 | 85802205 |
| 6  | 85794994 | 85803740 | NM_023455    | chr6  | 85795083 | 85796008 |
| 6  | 85773022 | 85781521 | NM_053097    | chr6  | 85777745 | 85778628 |
| 6  | 85773022 | 85781521 | NM_053097    | chr6  | 85774724 | 85775362 |
| 2  | 85640129 | 85649075 | NM_147015    | chr2  | 85643582 | 85644336 |
| 2  | 85644259 | 85652760 | NM_146580    | chr2  | 85643582 | 85644336 |
| 9  | 85633128 | 85642101 | NM_011627    | chr9  | 85633463 | 85634064 |
| 2  | 85446659 | 85471294 | NM_013728    | chr2  | 85449190 | 85449834 |
| 2  | 85317275 | 85325863 | BC120879     | chr2  | 85321200 | 85321870 |
| 12 | 85286662 | 85304777 | NM_001026214 | chr12 | 85288558 | 85289163 |
| 2  | 85229167 | 85246076 | NM_146434    | chr2  | 85243755 | 85244628 |
| 17 | 84896003 | 84904502 | BC090963     | chr17 | 84896298 | 84897019 |
| 15 | 84838907 | 84847457 | NM_023478    | chr15 | 84843094 | 84843730 |
| 15 | 84838907 | 84847457 | NM_023478    | chr15 | 84839705 | 84840654 |
| 15 | 84838907 | 84847457 | NM_023478    | chr15 | 84839035 | 84839651 |
| 17 | 84646495 | 84654994 | BC004681     | chr17 | 84650745 | 84651375 |
| 17 | 84585457 | 84593956 | NM_026180    | chr17 | 84588337 | 84588936 |
| 17 | 84588727 | 84597337 | NM_031884    | chr17 | 84588337 | 84588936 |
| 2  | 84573152 | 84582243 | NM_009776    | chr2  | 84576106 | 84577121 |
| 17 | 84526730 | 84537324 | NM_172256    | chr17 | 84536918 | 84537525 |
| 12 | 84327169 | 84335668 | BC048572     | chr12 | 84333503 | 84335088 |
| 3  | 84296266 | 84312788 | NM_030706    | chr3  | 84310748 | 84311338 |
| 3  | 84296266 | 84312788 | NM_030706    | chr3  | 84304600 | 84305435 |
| 3  | 84296266 | 84312788 | NM_030706    | chr3  | 84303273 | 84304355 |
| 3  | 84296266 | 84312788 | NM_030706    | chr3  | 84296527 | 84297507 |
| 7  | 84283600 | 84292144 | NM_007488    | chr7  | 84289979 | 84290580 |
| 15 | 84272326 | 84280863 | BC062953     | chr15 | 84279122 | 84279853 |
| 9  | 84214676 | 84223570 | BC089624     | chr9  | 84218345 | 84218833 |
| 1  | 84161117 | 84169616 | NM_001003948 | chr1  | 84161808 | 84162495 |
| 4  | 84015054 | 84023564 | NM_172870    | chr4  | 84020092 | 84020648 |
| 10 | 83961188 | 83969687 | NM_175451    | chr10 | 83961133 | 83961808 |
| 15 | 83948442 | 83956941 | NM_029427    | chr15 | 83954050 | 83954684 |
| 15 | 83948442 | 83956941 | NM_029427    | chr15 | 83951507 | 83952503 |
| 7  | 83818022 | 83833782 | BC056981     | chr7  | 83822776 | 83823829 |
| 15 | 83773242 | 83781741 | BC056955     | chr15 | 83776521 | 83777821 |



|    |          |          |              |       |          |          |
|----|----------|----------|--------------|-------|----------|----------|
| 7  | 83668512 | 83677018 | NM_029335    | chr7  | 83676331 | 83677000 |
| 7  | 83668512 | 83677018 | NM_029335    | chr7  | 83671520 | 83672667 |
| 6  | 83619235 | 83627774 | NM_016751    | chr6  | 83625780 | 83626269 |
| 17 | 83608525 | 83617034 | NM_054082    | chr17 | 83614740 | 83615441 |
| 15 | 83550264 | 83558787 | NM_022723    | chr15 | 83551913 | 83552866 |
| 7  | 83526616 | 83537581 | AF017111     | chr7  | 83528888 | 83529857 |
| 17 | 83420128 | 83428656 | NM_009187    | chr17 | 83421798 | 83422398 |
| 8  | 83383289 | 83391788 | NM_010369    | chr8  | 83388966 | 83389631 |
| 9  | 83339048 | 83347547 | NM_172507    | chr9  | 83339930 | 83340624 |
| 11 | 83104499 | 83121419 | NM_001035854 | chr11 | 83114776 | 83115778 |
| 11 | 83112211 | 83121172 | NM_134025    | chr11 | 83114776 | 83115778 |
| 1  | 83032786 | 83041285 | NM_027725    | chr1  | 83039519 | 83040347 |
| 11 | 83001525 | 83010024 | NM_011409    | chr11 | 83002916 | 83003869 |
| 1  | 82989806 | 82998316 | NM_016960    | chr1  | 82994760 | 82995310 |
| 11 | 82985381 | 82995297 | NM_011410    | chr11 | 82989465 | 82990435 |
| 11 | 82985381 | 82995297 | NM_011410    | chr11 | 82986523 | 82987417 |
| 8  | 82951562 | 82960078 | NM_020259    | chr8  | 82953647 | 82954786 |
| 12 | 82831537 | 82840036 | AF096286     | chr12 | 82831980 | 82832582 |
| 11 | 82805416 | 82814025 | NM_172796    | chr11 | 82807838 | 82808830 |
| 18 | 82603551 | 82612119 | NM_001025245 | chr18 | 82605675 | 82606266 |
| 15 | 82589389 | 82597949 | BC087906     | chr15 | 82592392 | 82593249 |
| 15 | 82589389 | 82597949 | BC087906     | chr15 | 82590615 | 82591613 |
| 7  | 82518826 | 82528206 | NM_175317    | chr7  | 82525051 | 82525753 |
| 7  | 82522209 | 82530713 | NM_177894    | chr7  | 82525051 | 82525753 |
| 4  | 82520899 | 82529398 | AB160986     | chr4  | 82521357 | 82521987 |
| 1  | 82460000 | 82468499 | NM_007734    | chr1  | 82463046 | 82463652 |
| 1  | 82463317 | 82471816 | NM_007735    | chr1  | 82463046 | 82463652 |
| 15 | 82446174 | 82454673 | NM_145474    | chr15 | 82447685 | 82448613 |
| 6  | 82362133 | 82370944 | NM_009313    | chr6  | 82366004 | 82367426 |
| 4  | 82353856 | 82362382 | NM_009887    | chr4  | 82356639 | 82357250 |
| 1  | 82315981 | 82324480 | BC004711     | chr1  | 82323090 | 82323686 |
| 1  | 82315981 | 82324480 | BC004711     | chr1  | 82316139 | 82316754 |
| 10 | 82282978 | 82298957 | NM_001042514 | chr10 | 82283901 | 82284524 |
| 15 | 82274158 | 82285833 | NM_010006    | chr15 | 82275856 | 82276899 |
| 15 | 82274158 | 82285833 | NM_010006    | chr15 | 82274625 | 82275200 |
| 15 | 82201286 | 82213926 | NM_019823    | chr15 | 82203941 | 82204688 |
| 11 | 82199095 | 82207594 | NM_023438    | chr11 | 82199605 | 82200446 |
| 13 | 82182754 | 82191253 | NM_028372    | chr13 | 82189401 | 82190073 |
| 13 | 82185781 | 82194304 | BC066818     | chr13 | 82189401 | 82190073 |
| 10 | 82117879 | 82126449 | NM_029102    | chr10 | 82119289 | 82119879 |
| 1  | 82106131 | 82115378 | AY169784     | chr1  | 82112550 | 82113149 |
| 13 | 82107961 | 82116481 | NM_054053    | chr13 | 82108763 | 82109287 |
| 15 | 82096657 | 82105269 | NM_011889    | chr15 | 82097574 | 82098512 |
| 13 | 82045478 | 82053977 | AF405693     | chr13 | 82051248 | 82052024 |
| 13 | 82045478 | 82053977 | AF405693     | chr13 | 82047133 | 82047737 |
| 13 | 82008219 | 82016718 | AF405694     | chr13 | 82014311 | 82014973 |
| 13 | 82008219 | 82016718 | AF405694     | chr13 | 82011448 | 82012060 |

|    |          |          |              |       |          |          |
|----|----------|----------|--------------|-------|----------|----------|
| 12 | 81884333 | 81893553 | NM_011387    | chr12 | 81885836 | 81886657 |
| 11 | 81868046 | 81876640 | NM_011330    | chr11 | 81873085 | 81874228 |
| 11 | 81855909 | 81864444 | NM_013654    | chr11 | 81861956 | 81862974 |
| 15 | 81758150 | 81766695 | NM_145473    | chr15 | 81763014 | 81764010 |
| 10 | 81668569 | 81677068 | BC040349     | chr10 | 81673540 | 81674180 |
| 8  | 81380025 | 81388545 | BC002088     | chr8  | 81380305 | 81381001 |
| 17 | 81281670 | 81290169 | BC094585     | chr17 | 81288924 | 81289577 |
| 17 | 81281670 | 81290169 | BC094585     | chr17 | 81284073 | 81285324 |
| 17 | 81281670 | 81290169 | BC094585     | chr17 | 81283138 | 81283790 |
| 8  | 81103414 | 81111913 | NM_183096    | chr8  | 81110113 | 81110767 |
| 15 | 81015396 | 81023905 | NM_153049    | chr15 | 81022951 | 81023552 |
| 15 | 81015396 | 81023905 | NM_153049    | chr15 | 81018660 | 81019482 |
| 11 | 80966497 | 80975098 | NM_007384    | chr11 | 80970873 | 80971558 |
| 11 | 80620610 | 80629109 | NM_029537    | chr11 | 80626796 | 80627426 |
| 10 | 80493231 | 80508001 | NM_145365    | chr10 | 80495537 | 80496480 |
| 15 | 80393849 | 80402348 | BC052496     | chr15 | 80395395 | 80396326 |
| 18 | 80288119 | 80296618 | BC024969     | chr18 | 80294255 | 80295288 |
| 9  | 80259754 | 80268323 | NM_022016    | chr9  | 80260336 | 80260942 |
| 2  | 80245188 | 80254464 | NM_011356    | chr2  | 80249533 | 80250287 |
| 11 | 80238823 | 80247347 | NM_178616    | chr11 | 80240785 | 80241125 |
| 1  | 80090469 | 80098968 | NM_173425    | chr1  | 80096153 | 80097156 |
| 7  | 80066125 | 80074624 | DQ073331     | chr7  | 80071395 | 80072009 |
| 3  | 79965915 | 79974587 | NM_133187    | chr3  | 79966917 | 79967442 |
| 12 | 79897087 | 79905586 | BC079613     | chr12 | 79901289 | 79901882 |
| 2  | 79706739 | 79715238 | NM_001009979 | chr2  | 79711122 | 79711727 |
| 7  | 79661771 | 79673301 | NM_008588    | chr7  | 79667217 | 79667886 |
| 9  | 79542873 | 79551537 | NM_009945    | chr9  | 79545656 | 79546491 |
| 15 | 79511748 | 79521074 | NM_028792    | chr15 | 79515685 | 79516544 |
| 15 | 79512150 | 79520763 | NM_013818    | chr15 | 79515685 | 79516544 |
| 2  | 79502619 | 79511156 | NM_172420    | chr2  | 79509569 | 79510326 |
| 2  | 79453095 | 79461594 | BC018526     | chr2  | 79459698 | 79460584 |
| 11 | 79337386 | 79352804 | NM_146023    | chr11 | 79350172 | 79350875 |
| 18 | 79246519 | 79255018 | NM_053099    | chr18 | 79252641 | 79254390 |
| 15 | 78988525 | 78998495 | BC023356     | chr15 | 78995263 | 78996053 |
| 10 | 78951038 | 78964220 | NM_027422    | chr10 | 78958130 | 78958797 |
| 5  | 78583927 | 78592426 | AY487415     | chr5  | 78587950 | 78588624 |
| 11 | 78510206 | 78519568 | NM_008702    | chr11 | 78512377 | 78513019 |
| 9  | 78395230 | 78403960 | NM_153098    | chr9  | 78400462 | 78401262 |
| 14 | 78393725 | 78402325 | NM_010701    | chr14 | 78397299 | 78399357 |
| 18 | 78338711 | 78347210 | AF367359     | chr18 | 78344846 | 78345476 |
| 18 | 78338711 | 78347210 | AF367359     | chr18 | 78342694 | 78343362 |
| 5  | 78167298 | 78176030 | AF492704     | chr5  | 78175035 | 78175639 |
| 10 | 78116516 | 78127371 | NM_009809    | chr10 | 78122980 | 78123361 |
| 10 | 78116516 | 78127371 | NM_009809    | chr10 | 78119139 | 78120224 |
| 10 | 78116516 | 78127371 | NM_009809    | chr10 | 78117262 | 78117864 |
| 5  | 78084798 | 78093297 | NM_027970    | chr5  | 78091506 | 78092098 |
| 11 | 77707482 | 77716028 | NM_008952    | chr11 | 77714211 | 77715004 |

|    |          |          |              |       |          |          |
|----|----------|----------|--------------|-------|----------|----------|
| 15 | 77550327 | 77558826 | NM_173743    | chr15 | 77551014 | 77552073 |
| 10 | 77444202 | 77452709 | NM_009646    | chr10 | 77448661 | 77449244 |
| 10 | 77446971 | 77455643 | NM_019448    | chr10 | 77448661 | 77449244 |
| 12 | 77298605 | 77307104 | BC029005     | chr12 | 77299377 | 77300048 |
| 10 | 77144360 | 77172719 | NM_010670    | chr10 | 77165343 | 77165893 |
| 10 | 77144360 | 77172719 | NM_010670    | chr10 | 77163481 | 77164202 |
| 10 | 77144360 | 77172719 | NM_010670    | chr10 | 77157781 | 77158402 |
| 10 | 77144360 | 77172719 | NM_010670    | chr10 | 77154330 | 77155055 |
| 10 | 77144360 | 77172719 | NM_010670    | chr10 | 77152004 | 77152688 |
| 10 | 77144360 | 77172719 | NM_010670    | chr10 | 77149297 | 77150444 |
| 9  | 76829133 | 76837658 | NM_012033    | chr9  | 76832520 | 76833326 |
| 9  | 76829133 | 76837658 | NM_012033    | chr9  | 76829571 | 76830159 |
| 2  | 76780887 | 76789386 | NM_011652    | chr2  | 76787382 | 76787803 |
| 12 | 76652001 | 76660519 | NM_030750    | chr12 | 76658780 | 76659465 |
| 12 | 76547699 | 76556589 | BC055860     | chr12 | 76555827 | 76556440 |
| 15 | 76511727 | 76531304 | NM_027122    | chr15 | 76511807 | 76512513 |
| 15 | 76464667 | 76473166 | NM_183091    | chr15 | 76470419 | 76471644 |
| 11 | 76385070 | 76399922 | NM_198895    | chr11 | 76397828 | 76398425 |
| 11 | 76385070 | 76399922 | NM_198895    | chr11 | 76388102 | 76388738 |
| 16 | 76283872 | 76292391 | AF147745     | chr16 | 76291382 | 76292018 |
| 11 | 76282145 | 76290649 | BC059064     | chr11 | 76286071 | 76286792 |
| 10 | 76264014 | 76272513 | BC042440     | chr10 | 76270093 | 76270868 |
| 10 | 76264014 | 76272513 | BC042440     | chr10 | 76267793 | 76268366 |
| 16 | 76232706 | 76241205 | BC060232     | chr16 | 76239325 | 76240245 |
| 13 | 76221940 | 76230439 | BC006925     | chr13 | 76228955 | 76229843 |
| 12 | 76221153 | 76229793 | NM_023275    | chr12 | 76223650 | 76224386 |
| 18 | 76178823 | 76187322 | BC018187     | chr18 | 76179059 | 76179806 |
| 9  | 76106956 | 76115487 | NM_198962    | chr9  | 76111225 | 76112002 |
| 14 | 76108801 | 76117300 | BC052062     | chr14 | 76108831 | 76109430 |
| 12 | 76093018 | 76102172 | NM_172805    | chr12 | 76101075 | 76102116 |
| 9  | 75997067 | 76005566 | NM_205844    | chr9  | 75997389 | 75998121 |
| 5  | 75850705 | 75859224 | NM_021099    | chr5  | 75858250 | 75859190 |
| 11 | 75724758 | 75733257 | NM_029548    | chr11 | 75727223 | 75727898 |
| 4  | 75602208 | 75611113 | NM_001014288 | chr4  | 75603712 | 75604775 |
| 15 | 75572678 | 75581177 | NM_194350    | chr15 | 75573320 | 75573909 |
| 10 | 75552235 | 75563581 | NM_023219    | chr10 | 75553921 | 75554513 |
| 15 | 75417897 | 75426412 | NM_026730    | chr15 | 75420585 | 75421684 |
| 10 | 75373682 | 75390388 | NM_008606    | chr10 | 75387248 | 75387835 |
| 10 | 75386028 | 75400787 | NM_009514    | chr10 | 75387248 | 75387835 |
| 9  | 75381061 | 75391042 | NM_001038710 | chr9  | 75385557 | 75386319 |
| 9  | 75381061 | 75391042 | NM_001038710 | chr9  | 75383162 | 75384049 |
| 14 | 75368520 | 75377019 | AB241122     | chr14 | 75372249 | 75372954 |
| 3  | 75351425 | 75362004 | NM_026460    | chr3  | 75359015 | 75359869 |
| 15 | 75256585 | 75265084 | NM_001039720 | chr15 | 75259180 | 75260229 |
| 1  | 75237492 | 75245991 | NM_010043    | chr1  | 75240377 | 75241502 |
| 18 | 75176084 | 75184583 | BC018220     | chr18 | 75181516 | 75182111 |
| 12 | 75097950 | 75106449 | BC056932     | chr12 | 75098944 | 75099638 |

|    |          |          |              |       |          |          |
|----|----------|----------|--------------|-------|----------|----------|
| 9  | 75091286 | 75102650 | NM_138719    | chr9  | 75095175 | 75096082 |
| 15 | 75089676 | 75098175 | NM_008530    | chr15 | 75092979 | 75094142 |
| 8  | 75078348 | 75092688 | NM_023126    | chr8  | 75085870 | 75086668 |
| 12 | 75075055 | 75083554 | AB102950     | chr12 | 75077153 | 75077588 |
| 9  | 75067740 | 75076239 | BC003985     | chr9  | 75070736 | 75071112 |
| 8  | 75032557 | 75041056 | NM_146338    | chr8  | 75038718 | 75039372 |
| 10 | 75001547 | 75010046 | NM_198860    | chr10 | 75008990 | 75010106 |
| 10 | 75001547 | 75010046 | NM_198860    | chr10 | 75002902 | 75003498 |
| 2  | 74990189 | 74998689 | BC092050     | chr2  | 74996856 | 74998577 |
| 2  | 74990189 | 74998689 | BC092050     | chr2  | 74991782 | 74992498 |
| 5  | 74982084 | 74990593 | AF034745     | chr5  | 74986234 | 74987068 |
| 10 | 74958507 | 74967096 | NM_175133    | chr10 | 74959113 | 74960043 |
| 5  | 74956990 | 74965521 | NM_010727    | chr5  | 74958384 | 74959000 |
| 15 | 74873586 | 74882085 | NM_010741    | chr15 | 74876304 | 74877158 |
| 1  | 74816127 | 74839928 | NM_153111    | chr1  | 74839732 | 74841112 |
| 13 | 74827503 | 74836007 | NM_001033042 | chr13 | 74830437 | 74831492 |
| 15 | 74822372 | 74831159 | NM_010738    | chr15 | 74825410 | 74826558 |
| 15 | 74822372 | 74831159 | NM_010738    | chr15 | 74824294 | 74825295 |
| 1  | 74816127 | 74839928 | NM_153111    | chr1  | 74819425 | 74820584 |
| 15 | 74808108 | 74816685 | NM_020498    | chr15 | 74810874 | 74811704 |
| 15 | 74808108 | 74816685 | NM_020498    | chr15 | 74809533 | 74810429 |
| 15 | 74776872 | 74787529 | NM_008529    | chr15 | 74783348 | 74784248 |
| 15 | 74681074 | 74689573 | NM_009991    | chr15 | 74685735 | 74686310 |
| 15 | 74681074 | 74689573 | NM_009991    | chr15 | 74682007 | 74682803 |
| 15 | 74666375 | 74674874 | NM_001033229 | chr15 | 74666234 | 74666833 |
| 15 | 74588323 | 74596822 | NM_010742    | chr15 | 74595119 | 74595974 |
| 1  | 74474994 | 74483493 | NM_176972    | chr1  | 74477755 | 74478212 |
| 10 | 74472084 | 74483329 | NM_029781    | chr10 | 74475298 | 74475982 |
| 15 | 74459605 | 74469516 | BC111897     | chr15 | 74465377 | 74466465 |
| 13 | 74423864 | 74432363 | NM_027704    | chr13 | 74431912 | 74432853 |
| 1  | 74336613 | 74350773 | NM_009509    | chr1  | 74344284 | 74345024 |
| 14 | 74322644 | 74332140 | NM_026457    | chr14 | 74325657 | 74326462 |
| 16 | 74291401 | 74299900 | NM_175549    | chr16 | 74298829 | 74299282 |
| 1  | 74259817 | 74268316 | NM_019999    | chr1  | 74264754 | 74265384 |
| 1  | 74205757 | 74220761 | NM_001039509 | chr1  | 74206717 | 74207404 |
| 11 | 74174866 | 74183365 | NM_001011851 | chr11 | 74180746 | 74181444 |
| 13 | 74164198 | 74172782 | NM_028878    | chr13 | 74164663 | 74165558 |
| 11 | 74161278 | 74169777 | NM_146709    | chr11 | 74161298 | 74161936 |
| 18 | 74093659 | 74102158 | BC062911     | chr18 | 74099466 | 74100140 |
| 18 | 74093659 | 74102158 | BC062911     | chr18 | 74096136 | 74096941 |
| 18 | 74093659 | 74102158 | BC062911     | chr18 | 74093964 | 74095203 |
| 12 | 74036524 | 74045067 | NM_008612    | chr12 | 74036644 | 74037227 |
| 11 | 74020985 | 74029484 | NM_146711    | chr11 | 74025656 | 74026257 |
| 11 | 73965310 | 73973809 | NM_146708    | chr11 | 73973164 | 73973812 |
| 5  | 73830404 | 73838903 | BC031793     | chr5  | 73835808 | 73836557 |
| 5  | 73830404 | 73838903 | BC031793     | chr5  | 73834712 | 73835551 |
| 5  | 73830404 | 73838903 | BC031793     | chr5  | 73834109 | 73834696 |

|    |          |          |              |       |          |          |
|----|----------|----------|--------------|-------|----------|----------|
| 13 | 73720801 | 73733346 | NM_018885    | chr13 | 73727656 | 73728352 |
| 9  | 73726129 | 73736699 | BC030416     | chr9  | 73727042 | 73727761 |
| 17 | 73703746 | 73712478 | NM_020578    | chr17 | 73707343 | 73708494 |
| 14 | 73460473 | 73472612 | NM_016903    | chr14 | 73470132 | 73470809 |
| 2  | 73458694 | 73467213 | NM_175752    | chr2  | 73459266 | 73460066 |
| 11 | 73403432 | 73411931 | NM_147023    | chr11 | 73408677 | 73409434 |
| 6  | 73396629 | 73405176 | NM_025737    | chr6  | 73399245 | 73399837 |
| 6  | 73396629 | 73405176 | NM_025737    | chr6  | 73398209 | 73398807 |
| 5  | 73280039 | 73288538 | NM_173403    | chr5  | 73283130 | 73283643 |
| 11 | 73202726 | 73218215 | NM_146921    | chr11 | 73215779 | 73216455 |
| 12 | 73152078 | 73161562 | NM_001007596 | chr12 | 73159720 | 73160786 |
| 5  | 73062656 | 73071155 | BC062884     | chr5  | 73065316 | 73065918 |
| 11 | 73048415 | 73056920 | NM_001001445 | chr11 | 73050788 | 73051905 |
| 5  | 73013141 | 73021737 | NM_013698    | chr5  | 73017934 | 73018560 |
| 1  | 72946600 | 72955106 | NM_009407    | chr1  | 72953355 | 72954543 |
| 1  | 72946600 | 72955106 | NM_009407    | chr1  | 72950178 | 72950813 |
| 5  | 72914478 | 72927887 | NM_007723    | chr5  | 72923916 | 72924593 |
| 5  | 72920931 | 72929493 | BC125449     | chr5  | 72923916 | 72924593 |
| 5  | 72895771 | 72904270 | M84742       | chr5  | 72895747 | 72896659 |
| 5  | 72857714 | 72872685 | NM_001024147 | chr5  | 72857877 | 72859340 |
| 11 | 72809337 | 72817836 | NM_008771    | chr11 | 72809334 | 72810105 |
| 9  | 72803176 | 72811675 | BC006717     | chr9  | 72805888 | 72806404 |
| 5  | 72780844 | 72789608 | NM_016869    | chr5  | 72783095 | 72783752 |
| 11 | 72771423 | 72780005 | NM_016745    | chr11 | 72775992 | 72776596 |
| 1  | 72631272 | 72639771 | NM_176980    | chr1  | 72634333 | 72634909 |
| 5  | 72553182 | 72561681 | BC029551     | chr5  | 72558619 | 72559319 |
| 18 | 72473911 | 72482410 | NM_007831    | chr18 | 72479936 | 72480570 |
| 14 | 72279898 | 72288397 | NM_172527    | chr14 | 72283150 | 72283754 |
| 14 | 72280941 | 72289449 | NM_011506    | chr14 | 72283150 | 72283754 |
| 8  | 72194069 | 72202568 | NM_172491    | chr8  | 72200363 | 72201026 |
| 11 | 72111858 | 72120359 | NM_001037713 | chr11 | 72116636 | 72117344 |
| 14 | 72100161 | 72108660 | AB030204     | chr14 | 72104123 | 72104843 |
| 11 | 72080300 | 72088799 | NM_001004148 | chr11 | 72086008 | 72086713 |
| 11 | 72080300 | 72088799 | NM_001004148 | chr11 | 72084783 | 72085788 |
| 8  | 72067443 | 72075942 | NM_199364    | chr8  | 72074498 | 72075097 |
| 14 | 71870343 | 71878842 | NM_134083    | chr14 | 71872216 | 71872888 |
| 2  | 71776054 | 71784578 | NM_019688    | chr2  | 71777529 | 71777950 |
| 11 | 71569831 | 71578330 | BC048831     | chr11 | 71573022 | 71573703 |
| 5  | 71372236 | 71380984 | NM_008066    | chr5  | 71373492 | 71374207 |
| 17 | 71329882 | 71338381 | NM_028887    | chr17 | 71334594 | 71335151 |
| 17 | 71329882 | 71338381 | NM_028887    | chr17 | 71330250 | 71331072 |
| 2  | 71324284 | 71332925 | NM_010053    | chr2  | 71327529 | 71328478 |
| 6  | 71296936 | 71305571 | BC030679     | chr6  | 71298885 | 71299605 |
| 6  | 71249243 | 71257742 | U76371       | chr6  | 71255467 | 71256061 |
| 6  | 71189333 | 71197838 | NM_009762    | chr6  | 71193215 | 71193955 |
| 6  | 71123467 | 71131977 | NM_017399    | chr6  | 71125434 | 71126429 |
| 2  | 71006815 | 71015354 | NM_010064    | chr2  | 71006882 | 71007648 |

|   |    |          |                       |       |          |          |
|---|----|----------|-----------------------|-------|----------|----------|
|   | 11 | 70996563 | 71005062 DQ117590     | chr11 | 71000045 | 71000657 |
|   | 9  | 70959321 | 70967849 NM_022026    | chr9  | 70963557 | 70964184 |
|   | 2  | 70912891 | 70921450 AF354666     | chr2  | 70919730 | 70920439 |
|   | 11 | 70847151 | 70855708 NM_134022    | chr11 | 70854750 | 70855660 |
|   | 9  | 70731313 | 70740025 NM_008280    | chr9  | 70735928 | 70736541 |
|   | 10 | 70678034 | 70686533 NM_145420    | chr10 | 70678544 | 70679569 |
|   | 6  | 70646143 | 70658513 BC092064     | chr6  | 70655495 | 70656106 |
|   | 6  | 70646143 | 70658513 BC092064     | chr6  | 70647752 | 70648464 |
|   | 10 | 70628103 | 70639573 NM_009360    | chr10 | 70632828 | 70633635 |
|   | 11 | 70574642 | 70583159 NM_177565    | chr11 | 70582279 | 70582990 |
|   | 11 | 70449317 | 70466283 NM_010326    | chr11 | 70462472 | 70463350 |
|   | 11 | 70460689 | 70476830 NM_024211    | chr11 | 70462472 | 70463350 |
|   | 11 | 70373076 | 70381711 NM_001045964 | chr11 | 70381053 | 70381673 |
|   | 17 | 70323696 | 70332195 NM_177639    | chr17 | 70329254 | 70329766 |
|   | 17 | 70323696 | 70332195 NM_177639    | chr17 | 70327722 | 70328330 |
|   | 17 | 70323696 | 70332195 NM_177639    | chr17 | 70326371 | 70326967 |
|   | 18 | 70176165 | 70184957 NM_030554    | chr18 | 70182762 | 70183569 |
|   | 18 | 70176165 | 70184957 NM_030554    | chr18 | 70180308 | 70180909 |
|   | 6  | 70139262 | 70147761 BC094049     | chr6  | 70144720 | 70145361 |
|   | 10 | 69942343 | 69950842 BC003231     | chr10 | 69947567 | 69949206 |
| X |    | 69886161 | 69894660 NM_029352    | chrX  | 69886679 | 69887740 |
|   | 4  | 69733282 | 69741781 BC106164     | chr4  | 69739788 | 69740776 |
|   | 8  | 69614537 | 69623083 NM_016708    | chr8  | 69615392 | 69616043 |
| X |    | 69513675 | 69524110 NM_011727    | chrX  | 69516673 | 69517676 |
|   | 11 | 69509506 | 69518293 NM_001034097 | chr11 | 69509629 | 69509972 |
| X |    | 69438936 | 69447441 BC064787     | chrX  | 69446272 | 69447371 |
| X |    | 69438936 | 69447441 BC064787     | chrX  | 69442839 | 69443657 |
|   | 8  | 69434745 | 69443244 NM_028927    | chr8  | 69441227 | 69441935 |
| X |    | 69399671 | 69408170 NM_001025384 | chrX  | 69404843 | 69405493 |
| X |    | 69345296 | 69355761 NM_011726    | chrX  | 69346907 | 69349200 |
| X |    | 69332699 | 69341198 BC098242     | chrX  | 69337167 | 69337778 |
|   | 10 | 69314889 | 69323388 NM_170687    | chr10 | 69321939 | 69322387 |
|   | 14 | 69252769 | 69265156 NM_009755    | chr14 | 69262298 | 69263014 |
|   | 14 | 69259919 | 69268541 NM_145219    | chr14 | 69262298 | 69263014 |
| X |    | 69243754 | 69253000 NM_009549    | chrX  | 69252328 | 69253237 |
| X |    | 69165241 | 69173881 NM_010941    | chrX  | 69171525 | 69172232 |
| X |    | 69167073 | 69177064 NM_019405    | chrX  | 69171525 | 69172232 |
|   | 17 | 69055712 | 69064211 NM_013813    | chr17 | 69057410 | 69058022 |
|   | 2  | 68930662 | 68939185 NM_181547    | chr2  | 68936679 | 68937636 |
| X |    | 68906265 | 68914906 NM_008067    | chrX  | 68908147 | 68908863 |
|   | 3  | 68772573 | 68781955 NM_008351    | chr3  | 68780941 | 68781935 |
|   | 3  | 68772573 | 68781955 NM_008351    | chr3  | 68775963 | 68776901 |
|   | 11 | 68740745 | 68749266 NM_145746    | chr11 | 68742517 | 68743155 |
|   | 3  | 68654363 | 68662935 NM_013928    | chr3  | 68654473 | 68655061 |
|   | 7  | 68620202 | 68628751 NM_001042592 | chr7  | 68623313 | 68624333 |
|   | 13 | 68356440 | 68364939 BC048507     | chr13 | 68357693 | 68358400 |
|   | 14 | 68245130 | 68253629 NM_173420    | chr14 | 68247200 | 68247719 |

|   |    |          |                       |       |          |          |
|---|----|----------|-----------------------|-------|----------|----------|
|   | 14 | 68245130 | 68253629 NM_173420    | chr14 | 68246370 | 68247003 |
|   | 17 | 68172772 | 68181271 NM_177278    | chr17 | 68174728 | 68175573 |
|   | 10 | 67934733 | 67943232 NM_028491    | chr10 | 67937221 | 67937930 |
|   | 2  | 67912567 | 67921066 NM_020283    | chr2  | 67919647 | 67920678 |
|   | 11 | 67718124 | 67726623 BC021474     | chr11 | 67721274 | 67721861 |
|   | 3  | 67664697 | 67673214 NM_025813    | chr3  | 67664811 | 67665531 |
|   | 7  | 67630698 | 67639206 NM_201639    | chr7  | 67630907 | 67631498 |
|   | 14 | 67606548 | 67615172 NM_010082    | chr14 | 67612315 | 67612899 |
|   | 18 | 67510088 | 67518599 NM_026473    | chr18 | 67513039 | 67513666 |
|   | 14 | 67484520 | 67493019 NM_007402    | chr14 | 67486504 | 67487131 |
| X |    | 67465323 | 67478137 NM_019926    | chrX  | 67477399 | 67478096 |
|   | 11 | 67343193 | 67351772 NM_008088    | chr11 | 67343434 | 67344141 |
|   | 2  | 67240841 | 67249340 NM_001024618 | chr2  | 67246355 | 67246948 |
|   | 11 | 66981261 | 66989914 NM_001039545 | chr11 | 66984257 | 66985160 |
|   | 11 | 66722186 | 66730685 NM_178656    | chr11 | 66723893 | 66724667 |
|   | 14 | 66715790 | 66724289 BC016533     | chr14 | 66722763 | 66723792 |
|   | 6  | 66704209 | 66712708 NM_134168    | chr6  | 66709612 | 66710321 |
|   | 15 | 66658999 | 66667498 NM_001029841 | chr15 | 66663766 | 66664634 |
|   | 15 | 66628679 | 66637178 U29056       | chr15 | 66633881 | 66634695 |
|   | 1  | 66395621 | 66404121 NM_175510    | chr1  | 66395646 | 66396266 |
|   | 3  | 66382249 | 66390766 NM_145820    | chr3  | 66385835 | 66386426 |
|   | 15 | 66328011 | 66336530 NM_019457    | chr15 | 66333626 | 66334350 |
|   | 17 | 66288356 | 66296855 NM_172963    | chr17 | 66294166 | 66294823 |
|   | 7  | 66264741 | 66273291 NM_146191    | chr7  | 66271790 | 66272579 |
|   | 7  | 66264741 | 66273291 NM_146191    | chr7  | 66270727 | 66271695 |
|   | 5  | 66136036 | 66144535 BC094937     | chr5  | 66143607 | 66144387 |
|   | 12 | 66138122 | 66146834 NM_027614    | chr12 | 66143570 | 66143919 |
|   | 5  | 66136036 | 66144535 BC094937     | chr5  | 66138125 | 66138938 |
|   | 12 | 66068998 | 66077497 BC021832     | chr12 | 66073676 | 66074398 |
|   | 18 | 65992863 | 66001362 NM_175012    | chr18 | 66000448 | 66001037 |
|   | 18 | 65992863 | 66001362 NM_175012    | chr18 | 65993927 | 65994698 |
|   | 2  | 65922983 | 65931632 NM_015736    | chr2  | 65929685 | 65930294 |
|   | 15 | 65736227 | 65748070 NM_010953    | chr15 | 65743181 | 65743934 |
|   | 15 | 65736227 | 65748070 NM_010953    | chr15 | 65737434 | 65738244 |
|   | 17 | 65536800 | 65547711 NM_153519    | chr17 | 65537862 | 65539002 |
|   | 6  | 65513976 | 65522672 NM_001001495 | chr6  | 65518608 | 65519813 |
|   | 5  | 65472848 | 65481347 NM_153391    | chr5  | 65477983 | 65478696 |
|   | 14 | 65302462 | 65310961 AF105222     | chr14 | 65303962 | 65304891 |
|   | 2  | 65296939 | 65305438 L42337       | chr2  | 65300465 | 65301083 |
|   | 14 | 65292483 | 65300984 NM_019675    | chr14 | 65296166 | 65297165 |
|   | 9  | 65252943 | 65261442 NM_138584    | chr9  | 65258836 | 65259843 |
|   | 3  | 65190943 | 65200071 NM_010597    | chr3  | 65195931 | 65196875 |
|   | 3  | 65190943 | 65200071 NM_010597    | chr3  | 65194510 | 65195105 |
|   | 3  | 65190943 | 65200071 NM_010597    | chr3  | 65192440 | 65193258 |
|   | 9  | 65146638 | 65155137 BC022772     | chr9  | 65146632 | 65147270 |
|   | 4  | 65085379 | 65101989 NM_053084    | chr4  | 65085382 | 65086093 |
|   | 14 | 65063997 | 65072496 AY098585     | chr14 | 65064851 | 65065359 |

|    |          |          |              |       |          |          |
|----|----------|----------|--------------|-------|----------|----------|
| 16 | 65045557 | 65054056 | NM_008310    | chr16 | 65048527 | 65049143 |
| 16 | 65045557 | 65054056 | NM_008310    | chr16 | 65046452 | 65047046 |
| 14 | 65029334 | 65037845 | NM_009618    | chr14 | 65031889 | 65032507 |
| 14 | 64960768 | 64969317 | NM_178747    | chr14 | 64968028 | 64968895 |
| 7  | 64749416 | 64757990 | NM_023239    | chr7  | 64757352 | 64757937 |
| 14 | 64753949 | 64762520 | NM_023209    | chr14 | 64754529 | 64755209 |
| 7  | 64650089 | 64658602 | NM_183087    | chr7  | 64656770 | 64657715 |
| 4  | 64604535 | 64613034 | NM_021362    | chr4  | 64612896 | 64613592 |
| 14 | 64376780 | 64385582 | NM_010932    | chr14 | 64383255 | 64383968 |
| 14 | 64214765 | 64223352 | NM_015795    | chr14 | 64220196 | 64221153 |
| 15 | 64210093 | 64218592 | NM_010026    | chr15 | 64215659 | 64216268 |
| 9  | 64177689 | 64186195 | NM_172522    | chr9  | 64182139 | 64182933 |
| X  | 64179602 | 64188115 | NM_025763    | chrX  | 64179898 | 64180551 |
| 13 | 64095909 | 64104408 | NM_008291    | chr13 | 64098459 | 64098804 |
| 13 | 64095909 | 64104408 | NM_008291    | chr13 | 64096215 | 64097294 |
| 7  | 64058533 | 64067039 | AF047714     | chr7  | 64062035 | 64063010 |
| 14 | 63928231 | 63936730 | BC055700     | chr14 | 63931745 | 63932565 |
| 14 | 63898155 | 63906654 | NM_153414    | chr14 | 63902499 | 63903104 |
| 14 | 63901458 | 63909960 | NM_177338    | chr14 | 63902499 | 63903104 |
| 16 | 63803838 | 63812360 | NM_010140    | chr16 | 63806559 | 63807184 |
| 9  | 63553210 | 63562000 | NM_016769    | chr9  | 63558450 | 63559032 |
| 4  | 63530678 | 63539177 | D90343       | chr4  | 63531967 | 63532905 |
| 14 | 63406505 | 63416013 | NM_026322    | chr14 | 63408246 | 63408864 |
| 3  | 63377801 | 63386651 | NM_008604    | chr3  | 63380329 | 63381039 |
| 4  | 63345033 | 63353645 | NM_009403    | chr4  | 63345682 | 63346292 |
| 4  | 63096402 | 63104901 | NM_029324    | chr4  | 63103995 | 63104589 |
| 4  | 63039147 | 63051316 | NM_144905    | chr4  | 63050581 | 63051187 |
| 14 | 62978720 | 62987219 | BC031365     | chr14 | 62985671 | 62986635 |
| 4  | 62979813 | 62988312 | NM_001008791 | chr4  | 62984283 | 62985213 |
| 14 | 62978720 | 62987219 | BC031365     | chr14 | 62980083 | 62981031 |
| 14 | 62970000 | 62978520 | AY168340     | chr14 | 62974425 | 62975019 |
| 14 | 62939391 | 62947900 | NM_026359    | chr14 | 62940859 | 62941493 |
| 4  | 62836523 | 62851334 | NM_011016    | chr4  | 62849907 | 62850909 |
| 4  | 62836523 | 62851334 | NM_011016    | chr4  | 62843468 | 62844150 |
| 4  | 62836523 | 62851334 | NM_011016    | chr4  | 62841368 | 62842410 |
| 4  | 62836523 | 62851334 | NM_011016    | chr4  | 62836554 | 62837323 |
| 16 | 62744605 | 62759431 | NM_026588    | chr16 | 62753415 | 62754049 |
| 4  | 62695773 | 62704272 | NM_025685    | chr4  | 62699497 | 62700105 |
| 11 | 62689685 | 62698204 | NM_026210    | chr11 | 62696896 | 62697499 |
| 4  | 62695773 | 62704272 | NM_025685    | chr4  | 62696228 | 62696988 |
| 4  | 62655908 | 62664492 | NM_010616    | chr4  | 62662340 | 62662800 |
| 4  | 62655908 | 62664492 | NM_010616    | chr4  | 62656283 | 62657018 |
| 14 | 62460367 | 62469202 | NM_021480    | chr14 | 62466786 | 62467386 |
| 11 | 62458875 | 62467374 | BC096583     | chr11 | 62462719 | 62463446 |
| 11 | 62462219 | 62470718 | NM_198861    | chr11 | 62462719 | 62463446 |
| 14 | 62384565 | 62393064 | NM_177628    | chr14 | 62391993 | 62392596 |
| 14 | 62384565 | 62393064 | NM_177628    | chr14 | 62388637 | 62389511 |



|    |          |          |              |       |          |          |
|----|----------|----------|--------------|-------|----------|----------|
| 14 | 62384565 | 62393064 | NM_177628    | chr14 | 62387242 | 62388183 |
| 11 | 62384681 | 62394661 | NM_011706    | chr11 | 62385011 | 62385765 |
| 14 | 62081425 | 62089924 | M14222       | chr14 | 62082713 | 62083319 |
| 15 | 62046570 | 62055069 | NM_026230    | chr15 | 62049311 | 62050488 |
| 4  | 61954734 | 61963238 | NM_023597    | chr4  | 61962911 | 61963664 |
| 4  | 61960428 | 61975272 | NM_138653    | chr4  | 61962911 | 61963664 |
| 9  | 61822266 | 61830796 | NM_028748    | chr9  | 61823416 | 61824371 |
| 11 | 61668313 | 61677268 | NM_013881    | chr11 | 61670808 | 61671414 |
| 18 | 61632149 | 61640648 | NM_177828    | chr18 | 61635425 | 61636064 |
| 13 | 61577189 | 61585747 | NM_026906    | chr13 | 61578330 | 61579215 |
| 4  | 61571116 | 61579673 | NM_001039544 | chr4  | 61575610 | 61576150 |
| 10 | 61522447 | 61531031 | NM_009719    | chr10 | 61530336 | 61530908 |
| 14 | 61407900 | 61416399 | NM_172810    | chr14 | 61411631 | 61412325 |
| 4  | 61319042 | 61327541 | NM_008649    | chr4  | 61324834 | 61325271 |
| 18 | 61158918 | 61167568 | NM_009880    | chr18 | 61163031 | 61164281 |
| 4  | 61157932 | 61166497 | BC012259     | chr4  | 61162443 | 61162967 |
| 18 | 61158918 | 61167568 | NM_009880    | chr18 | 61159656 | 61160511 |
| 4  | 61157932 | 61166497 | BC012259     | chr4  | 61158136 | 61158763 |
| 6  | 61104115 | 61112616 | BC107399     | chr6  | 61107855 | 61108693 |
| 4  | 61003341 | 61011840 | BC037152     | chr4  | 61007647 | 61008171 |
| 11 | 60951030 | 60959529 | NM_021349    | chr11 | 60956409 | 60957005 |
| 1  | 60916460 | 60924975 | NM_017480    | chr1  | 60924215 | 60924929 |
| 1  | 60916460 | 60924975 | NM_017480    | chr1  | 60918411 | 60919397 |
| 2  | 60761532 | 60774952 | NM_020296    | chr2  | 60769382 | 60770067 |
| 15 | 60748448 | 60758294 | DQ520794     | chr15 | 60749993 | 60750606 |
| 4  | 60634199 | 60642721 | BC099597     | chr4  | 60634201 | 60635099 |
| 10 | 60561343 | 60573118 | NM_001017433 | chr10 | 60567153 | 60568073 |
| 11 | 60538593 | 60547203 | NM_001009927 | chr11 | 60543881 | 60544503 |
| 11 | 60540898 | 60549416 | NM_022009    | chr11 | 60543881 | 60544503 |
| X  | 60535027 | 60543661 | NM_178740    | chrX  | 60535410 | 60536062 |
| 10 | 60478716 | 60489919 | NM_025273    | chr10 | 60487349 | 60488324 |
| 2  | 60472001 | 60482905 | NM_021359    | chr2  | 60472012 | 60472899 |
| 8  | 60436386 | 60444896 | BC092294     | chr8  | 60437018 | 60437639 |
| 14 | 60257863 | 60266362 | NM_177337    | chr14 | 60258911 | 60259530 |
| 4  | 60231412 | 60239951 | NM_008647    | chr4  | 60233896 | 60234311 |
| 4  | 60231412 | 60239951 | NM_008647    | chr4  | 60232879 | 60233726 |
| 4  | 60161900 | 60170419 | BC100586     | chr4  | 60166386 | 60166905 |
| 2  | 60070539 | 60079038 | BC005501     | chr2  | 60074660 | 60075309 |
| 4  | 60052207 | 60060719 | NM_008648    | chr4  | 60052363 | 60053472 |
| 14 | 59976449 | 59984948 | AF247000     | chr14 | 59983221 | 59983834 |
| 11 | 59845517 | 59859059 | NM_008819    | chr11 | 59848661 | 59849329 |
| 10 | 59714443 | 59722942 | AY563163     | chr10 | 59721696 | 59722303 |
| 13 | 59713305 | 59721804 | NM_028157    | chr13 | 59716579 | 59717203 |
| 10 | 59581565 | 59595596 | NM_016803    | chr10 | 59588998 | 59590011 |
| 16 | 59578810 | 59587423 | NM_019665    | chr16 | 59581909 | 59582503 |
| 13 | 59551563 | 59560062 | BC082335     | chr13 | 59558324 | 59558928 |
| 16 | 59408098 | 59416823 | NM_025910    | chr16 | 59411308 | 59411932 |

|    |          |          |              |       |          |          |
|----|----------|----------|--------------|-------|----------|----------|
| 9  | 59370343 | 59378842 | NM_175235    | chr9  | 59372538 | 59373133 |
| 3  | 59296309 | 59304811 | NM_028808    | chr3  | 59300349 | 59301375 |
| 16 | 59285456 | 59293955 | NM_146991    | chr16 | 59289375 | 59290245 |
| 11 | 59260255 | 59268815 | NM_178659    | chr11 | 59265564 | 59266204 |
| 3  | 59216001 | 59225257 | NM_133200    | chr3  | 59222060 | 59222940 |
| 3  | 59187202 | 59195720 | NM_173398    | chr3  | 59191624 | 59192249 |
| 11 | 59189349 | 59197848 | NM_001045521 | chr11 | 59189054 | 59189649 |
| 18 | 59181878 | 59190401 | NM_173759    | chr18 | 59187233 | 59188198 |
| 15 | 59179711 | 59188210 | BC040815     | chr15 | 59182719 | 59183312 |
| 1  | 59100715 | 59112113 | NM_145143    | chr1  | 59108544 | 59109155 |
| 1  | 59100715 | 59112113 | NM_145143    | chr1  | 59101749 | 59102450 |
| 4  | 59078615 | 59087132 | NM_025968    | chr4  | 59082918 | 59083509 |
| 4  | 59083116 | 59100052 | NM_001033165 | chr4  | 59082918 | 59083509 |
| 16 | 59050365 | 59058864 | NM_001011791 | chr16 | 59055911 | 59056553 |
| 16 | 59050365 | 59058864 | NM_001011791 | chr16 | 59053317 | 59054284 |
| 19 | 59000427 | 59008926 | BC023285     | chr19 | 59002313 | 59002946 |
| 16 | 58976511 | 58985013 | NM_146322    | chr16 | 58979950 | 58980869 |
| 3  | 58970642 | 58979141 | NM_153384    | chr3  | 58973377 | 58973971 |
| 6  | 58951581 | 58960080 | NM_153574    | chr6  | 58959075 | 58959779 |
| 6  | 58951581 | 58960080 | NM_153574    | chr6  | 58952946 | 58953564 |
| 19 | 58911696 | 58920234 | NM_175199    | chr19 | 58919336 | 58920203 |
| 11 | 58843205 | 58865307 | BC044882     | chr11 | 58857076 | 58857667 |
| 11 | 58843205 | 58865307 | BC044882     | chr11 | 58846454 | 58847522 |
| 11 | 58843205 | 58865307 | BC044882     | chr11 | 58843228 | 58843840 |
| 10 | 58831749 | 58843136 | NM_010959    | chr10 | 58836972 | 58837567 |
| 19 | 58776137 | 58784724 | NM_018874    | chr19 | 58779694 | 58780207 |
| 19 | 58776137 | 58784724 | NM_018874    | chr19 | 58777002 | 58777659 |
| 11 | 58669630 | 58685934 | NM_172403    | chr11 | 58678690 | 58679580 |
| 11 | 58641351 | 58649850 | NM_001011819 | chr11 | 58646176 | 58647163 |
| 11 | 58627123 | 58635622 | NM_146536    | chr11 | 58631683 | 58632854 |
| 11 | 58615712 | 58624211 | BC117741     | chr11 | 58620844 | 58621598 |
| 11 | 58588284 | 58604930 | NM_001011760 | chr11 | 58596685 | 58597290 |
| 6  | 58579216 | 58587715 | AF140218     | chr6  | 58585210 | 58586002 |
| 6  | 58579216 | 58587715 | AF140218     | chr6  | 58583030 | 58583861 |
| 19 | 58559243 | 58567771 | NM_029372    | chr19 | 58561036 | 58561428 |
| 19 | 58505217 | 58514609 | NM_010279    | chr19 | 58511608 | 58512282 |
| 11 | 58427166 | 58435665 | NM_144544    | chr11 | 58432278 | 58433194 |
| 11 | 58391041 | 58399558 | NM_207153    | chr11 | 58396361 | 58397348 |
| 2  | 58350712 | 58359211 | AF332088     | chr2  | 58352639 | 58353286 |
| 11 | 58343766 | 58352265 | NM_146879    | chr11 | 58346251 | 58346809 |
| 11 | 58304449 | 58312948 | NM_001011770 | chr11 | 58308606 | 58309202 |
| 9  | 58280740 | 58290244 | NM_176921    | chr9  | 58281539 | 58281976 |
| 11 | 58266619 | 58278175 | NM_146878    | chr11 | 58274809 | 58275820 |
| 1  | 58216872 | 58225371 | NM_001008419 | chr1  | 58222382 | 58223319 |
| 1  | 58216872 | 58225371 | NM_001008419 | chr1  | 58221261 | 58222114 |
| 11 | 58189241 | 58197751 | NM_027339    | chr11 | 58192059 | 58192997 |
| 9  | 58166073 | 58174592 | BC100468     | chr9  | 58172093 | 58173092 |

|    |          |          |              |       |          |          |
|----|----------|----------|--------------|-------|----------|----------|
| 15 | 58151753 | 58160252 | NM_177755    | chr15 | 58158633 | 58159606 |
| 1  | 58148943 | 58157515 | NM_023631    | chr1  | 58153415 | 58154377 |
| 10 | 58068512 | 58077053 | NM_010100    | chr10 | 58074113 | 58075276 |
| 1  | 58051682 | 58060181 | NM_023617    | chr1  | 58058622 | 58059206 |
| 4  | 58007771 | 58016318 | NM_178727    | chr4  | 58009734 | 58010711 |
| 5  | 58000337 | 58008836 | NM_018764    | chr5  | 58003290 | 58004193 |
| 11 | 57997954 | 58006453 | DQ508487     | chr11 | 57999591 | 58000727 |
| 9  | 57954145 | 57963279 | NM_012043    | chr9  | 57961254 | 57962109 |
| 9  | 57921225 | 57929985 | NM_009291    | chr9  | 57928559 | 57929608 |
| 2  | 57865617 | 57874227 | NM_029972    | chr2  | 57868005 | 57869090 |
| 1  | 57784117 | 57792616 | BC014764     | chr1  | 57787461 | 57788171 |
| 1  | 57784117 | 57792616 | BC014764     | chr1  | 57785413 | 57786510 |
| 10 | 57616384 | 57638017 | NM_001034869 | chr10 | 57629335 | 57630465 |
| 9  | 57479273 | 57487792 | NM_009993    | chr9  | 57484633 | 57485249 |
| 10 | 57476959 | 57485458 | NM_020561    | chr10 | 57484560 | 57485265 |
| 10 | 57467338 | 57475854 | NM_021272    | chr10 | 57472849 | 57474068 |
| 3  | 57380303 | 57395848 | NM_008536    | chr3  | 57387558 | 57388168 |
| 3  | 57380303 | 57395848 | NM_008536    | chr3  | 57380297 | 57380896 |
| 15 | 57305209 | 57313708 | NM_172378    | chr15 | 57312385 | 57312980 |
| 12 | 57261381 | 57269886 | NM_145442    | chr12 | 57263376 | 57264031 |
| 18 | 57252844 | 57261343 | NM_001001979 | chr18 | 57254154 | 57254749 |
| 4  | 57038979 | 57047478 | NM_175518    | chr4  | 57043114 | 57043701 |
| 17 | 56958450 | 56966961 | NM_011691    | chr17 | 56965980 | 56966622 |
| 14 | 56950866 | 56959372 | NM_028643    | chr14 | 56952899 | 56953497 |
| 6  | 56925878 | 56934377 | NM_134175    | chr6  | 56932036 | 56933052 |
| 19 | 56921666 | 56930216 | NM_172840    | chr19 | 56924635 | 56925228 |
| 6  | 56908920 | 56917419 | NM_134174    | chr6  | 56916807 | 56917387 |
| 9  | 56868513 | 56881799 | NM_011378    | chr9  | 56872200 | 56872824 |
| 11 | 56849379 | 56857878 | NM_008165    | chr11 | 56856160 | 56857860 |
| 11 | 56849379 | 56857878 | NM_008165    | chr11 | 56850191 | 56850773 |
| 4  | 56828061 | 56840008 | NM_009611    | chr4  | 56835917 | 56836500 |
| 4  | 56832932 | 56841450 | NM_025271    | chr4  | 56835917 | 56836500 |
| 17 | 56832485 | 56841110 | NM_011617    | chr17 | 56832711 | 56833311 |
| 9  | 56787105 | 56796148 | NM_019651    | chr9  | 56793750 | 56794364 |
| 17 | 56761264 | 56769763 | NM_153551    | chr17 | 56762835 | 56763692 |
| 13 | 56706674 | 56715427 | AF063006     | chr13 | 56713619 | 56714291 |
| 19 | 56526937 | 56535436 | BC051054     | chr19 | 56534111 | 56535160 |
| 19 | 56526937 | 56535436 | BC051054     | chr19 | 56530586 | 56531262 |
| 19 | 56508890 | 56517408 | NM_172641    | chr19 | 56509698 | 56510657 |
| 19 | 56440762 | 56449285 | NM_008733    | chr19 | 56441198 | 56442152 |
| 13 | 56259286 | 56267785 | NM_010896    | chr13 | 56259357 | 56260161 |
| 12 | 56215391 | 56224414 | BC034876     | chr12 | 56221199 | 56221994 |
| 12 | 56218594 | 56227130 | NM_021529    | chr12 | 56221199 | 56221994 |
| 17 | 56107578 | 56116147 | NM_011218    | chr17 | 56114516 | 56115103 |
| 14 | 56076832 | 56093687 | NM_001010937 | chr14 | 56085096 | 56085844 |
| 10 | 55789323 | 55797831 | NM_133751    | chr10 | 55795353 | 55795917 |
| 14 | 55763244 | 55771807 | NM_144842    | chr14 | 55771509 | 55772076 |

|    |          |                       |       |          |          |
|----|----------|-----------------------|-------|----------|----------|
| 7  | 55704046 | 55712724 BC052713     | chr7  | 55708958 | 55709640 |
| 17 | 55700597 | 55721239 NM_020568    | chr17 | 55703100 | 55703949 |
| 13 | 55696746 | 55713722 NM_181278    | chr13 | 55697407 | 55698025 |
| 7  | 55630203 | 55638779 NM_178706    | chr7  | 55637882 | 55638427 |
| 7  | 55630203 | 55638779 NM_178706    | chr7  | 55631020 | 55631775 |
| 6  | 55608135 | 55616647 NM_009717    | chr6  | 55611363 | 55612085 |
| 6  | 55608135 | 55616647 NM_009717    | chr6  | 55608388 | 55609085 |
| 13 | 55433903 | 55442415 NM_021489    | chr13 | 55435434 | 55436305 |
| 6  | 55299921 | 55308442 NM_001003685 | chr6  | 55306672 | 55307404 |
| 3  | 55194069 | 55202568 NM_144895    | chr3  | 55196980 | 55197729 |
| 14 | 55186178 | 55194738 NM_010371    | chr14 | 55192638 | 55193381 |
| 3  | 55140348 | 55148984 NM_007628    | chr3  | 55141299 | 55141918 |
| 14 | 55111137 | 55119650 NM_010375    | chr14 | 55111465 | 55112216 |
| 14 | 55084180 | 55092679 NM_010372    | chr14 | 55091854 | 55092434 |
| 14 | 55084180 | 55092679 NM_010372    | chr14 | 55086564 | 55087454 |
| 11 | 55051218 | 55059717 AF453743     | chr11 | 55058562 | 55059224 |
| 14 | 55054061 | 55062645 NM_007800    | chr14 | 55056762 | 55057663 |
| 11 | 55025951 | 55034500 NM_153170    | chr11 | 55032814 | 55033399 |
| 13 | 55028027 | 55036956 NM_001033245 | chr13 | 55027697 | 55028785 |
| 8  | 55004424 | 55012923 NM_001005847 | chr8  | 55004450 | 55005098 |
| 14 | 54990194 | 54998711 NM_008571    | chr14 | 54996864 | 54997480 |
| 14 | 54982067 | 54990566 NM_010782    | chr14 | 54982373 | 54982998 |
| 6  | 54961579 | 54970097 NM_180678    | chr6  | 54962654 | 54963418 |
| 15 | 54936407 | 54945065 NM_145470    | chr15 | 54942707 | 54943330 |
| 14 | 54896132 | 54904809 NM_010780    | chr14 | 54900009 | 54900850 |
| 14 | 54899051 | 54907550 M68899       | chr14 | 54900009 | 54900850 |
| 14 | 54896132 | 54904809 NM_010780    | chr14 | 54897135 | 54897931 |
| 11 | 54874336 | 54882837 NM_013472    | chr11 | 54875185 | 54876395 |
| 9  | 54844167 | 54852727 NM_148944    | chr9  | 54846863 | 54847582 |
| 9  | 54822068 | 54830696 NM_145129    | chr9  | 54827619 | 54828207 |
| 13 | 54747311 | 54755810 AF146569     | chr13 | 54753934 | 54754552 |
| 14 | 54735591 | 54748879 NM_080435    | chr14 | 54737973 | 54739118 |
| 14 | 54566241 | 54574806 NM_020002    | chr14 | 54573606 | 54574273 |
| 3  | 54563352 | 54571857 BC023828     | chr3  | 54563488 | 54564084 |
| 9  | 54500539 | 54509038 BC022948     | chr9  | 54507384 | 54508020 |
| 9  | 54500539 | 54509038 BC022948     | chr9  | 54504585 | 54505298 |
| 9  | 54457319 | 54466022 NM_053178    | chr9  | 54459688 | 54460408 |
| 14 | 54458694 | 54467930 NM_009947    | chr14 | 54459369 | 54460383 |
| 6  | 54357300 | 54365799 NM_198118    | chr6  | 54358040 | 54358638 |
| 6  | 54196399 | 54204898 NM_023543    | chr6  | 54203715 | 54204608 |
| 6  | 54196399 | 54204898 NM_023543    | chr6  | 54201805 | 54202539 |
| 14 | 54170076 | 54180383 NM_027790    | chr14 | 54175568 | 54176319 |
| 13 | 54062780 | 54071279 NM_010076    | chr13 | 54069311 | 54070001 |
| 13 | 54062780 | 54071279 NM_010076    | chr13 | 54067460 | 54068111 |
| 14 | 54042906 | 54051523 NM_153083    | chr14 | 54043263 | 54044311 |
| 14 | 54043620 | 54052119 NM_001039198 | chr14 | 54043263 | 54044311 |
| 19 | 54034764 | 54043263 BC049775     | chr19 | 54042488 | 54043094 |

|    |          |                       |       |          |          |
|----|----------|-----------------------|-------|----------|----------|
| 19 | 54034764 | 54043263 BC049775     | chr19 | 54040550 | 54041202 |
| 14 | 53917549 | 53926798 NM_010856    | chr14 | 53921514 | 53922158 |
| 11 | 53909870 | 53918391 NM_019417    | chr11 | 53911819 | 53912386 |
| 2  | 53898262 | 53906938 NM_023396    | chr2  | 53898601 | 53899501 |
| 9  | 53864036 | 53872544 NM_001033535 | chr9  | 53868694 | 53869349 |
| 4  | 53794805 | 53803334 NM_009317    | chr4  | 53795269 | 53795782 |
| 15 | 53730020 | 53738519 NM_177225    | chr15 | 53730077 | 53730782 |
| 14 | 53634421 | 53643746 NM_021437    | chr14 | 53641026 | 53641845 |
| 14 | 53638637 | 53647136 NM_023190    | chr14 | 53641026 | 53641845 |
| 6  | 53528040 | 53536539 BC029022     | chr6  | 53528136 | 53529303 |
| 14 | 53412352 | 53432934 NM_022993    | chr14 | 53430871 | 53431564 |
| 11 | 53357223 | 53365722 NM_033144    | chr11 | 53359241 | 53359884 |
| 18 | 53295734 | 53304233 NM_026386    | chr18 | 53297133 | 53297765 |
| X  | 53120472 | 53137271 NM_001077362 | chrX  | 53133605 | 53134235 |
| 14 | 53074278 | 53082777 BC038285     | chr14 | 53079083 | 53079679 |
| 14 | 53027025 | 53035524 BC111819     | chr14 | 53029695 | 53031084 |
| 13 | 52990816 | 52999471 NM_017373    | chr13 | 52998054 | 52998889 |
| 5  | 52955450 | 52963955 NM_172490    | chr5  | 52956793 | 52957548 |
| 12 | 52947184 | 52955683 NM_008159    | chr12 | 52951216 | 52951809 |
| 4  | 52930393 | 52938892 NM_146839    | chr4  | 52935869 | 52936474 |
| 4  | 52930393 | 52938892 NM_146839    | chr4  | 52932024 | 52932894 |
| 1  | 52759479 | 52768120 NM_008384    | chr1  | 52762884 | 52763485 |
| 5  | 52661390 | 52669889 NM_001007590 | chr5  | 52661579 | 52662553 |
| 1  | 52651206 | 52659705 NM_133829    | chr1  | 52653828 | 52654435 |
| 4  | 52611374 | 52619873 NM_026652    | chr4  | 52619192 | 52619829 |
| 13 | 52603314 | 52611813 NM_011518    | chr13 | 52608511 | 52609336 |
| 18 | 52450905 | 52459452 NM_026286    | chr18 | 52457959 | 52458562 |
| 18 | 52450905 | 52459452 NM_026286    | chr18 | 52451531 | 52451962 |
| 19 | 52311634 | 52320274 NM_008386    | chr19 | 52313691 | 52314317 |
| 17 | 52061692 | 52070191 NM_001031811 | chr17 | 52066094 | 52066817 |
| 11 | 51986855 | 51995354 NM_207227    | chr11 | 51992315 | 51992995 |
| 11 | 51986855 | 51995354 NM_207227    | chr11 | 51987018 | 51987783 |
| 3  | 51941713 | 51950543 NM_001004176 | chr3  | 51946380 | 51947039 |
| 3  | 51941713 | 51950543 NM_001004176 | chr3  | 51942115 | 51942824 |
| 17 | 51924195 | 51932694 NM_177825    | chr17 | 51924797 | 51925675 |
| 5  | 51839565 | 51848109 NM_008904    | chr5  | 51845339 | 51846542 |
| 2  | 51754397 | 51763172 NM_030243    | chr2  | 51759779 | 51760420 |
| 7  | 51749937 | 51758436 BC013456     | chr7  | 51756130 | 51756714 |
| 9  | 51511717 | 51520216 NM_175535    | chr9  | 51512363 | 51512960 |
| 6  | 51468106 | 51476605 NM_028035    | chr6  | 51475842 | 51476588 |
| 13 | 51415260 | 51423773 NM_010101    | chr13 | 51417323 | 51418145 |
| 14 | 51410498 | 51418997 NM_020512    | chr14 | 51411985 | 51412718 |
| 14 | 51330379 | 51338878 NM_146431    | chr14 | 51332596 | 51333409 |
| 14 | 51288916 | 51301002 NM_146432    | chr14 | 51293680 | 51294526 |
| 14 | 50955561 | 50964060 NM_001001808 | chr14 | 50955554 | 50956104 |
| 14 | 50831001 | 50841302 NM_013864    | chr14 | 50836451 | 50837416 |
| 14 | 50834376 | 50842875 BC049709     | chr14 | 50836451 | 50837416 |

|   |    |          |                       |       |          |          |
|---|----|----------|-----------------------|-------|----------|----------|
|   | 11 | 50822126 | 50830625 NM_146911    | chr11 | 50823715 | 50824247 |
|   | 11 | 50794556 | 50803055 NM_008936    | chr11 | 50799434 | 50800620 |
|   | 14 | 50769719 | 50778218 NM_053111    | chr14 | 50776902 | 50777494 |
|   | 11 | 50728367 | 50736924 NM_172794    | chr11 | 50728705 | 50729519 |
|   | 14 | 50693042 | 50701541 NM_177544    | chr14 | 50700057 | 50701046 |
|   | 11 | 50688565 | 50702746 NM_173372    | chr11 | 50697217 | 50697892 |
|   | 18 | 50691362 | 50699873 NM_026108    | chr18 | 50693573 | 50694332 |
|   | 6  | 50581528 | 50590027 NM_021892    | chr6  | 50589508 | 50589935 |
|   | 6  | 50581528 | 50590027 NM_021892    | chr6  | 50586301 | 50586956 |
|   | 16 | 50508003 | 50516502 NM_027046    | chr16 | 50513895 | 50514815 |
|   | 9  | 50489178 | 50510523 NM_025865    | chr9  | 50500046 | 50500632 |
|   | 9  | 50497555 | 50507749 NM_009964    | chr9  | 50500046 | 50500632 |
|   | 13 | 50473804 | 50482303 NM_001033400 | chr13 | 50480378 | 50481930 |
|   | 10 | 50396691 | 50405190 BC059917     | chr10 | 50404092 | 50404824 |
|   | 18 | 50397699 | 50406198 NM_001004061 | chr18 | 50402175 | 50402939 |
|   | 6  | 50355498 | 50363997 BC044866     | chr6  | 50358352 | 50359186 |
|   | 6  | 50309924 | 50318423 NM_027881    | chr6  | 50314700 | 50315350 |
|   | 11 | 50272035 | 50280534 NM_172557    | chr11 | 50276595 | 50277584 |
|   | 14 | 50115375 | 50123874 NM_007449    | chr14 | 50122129 | 50122868 |
|   | 14 | 50119640 | 50128145 NM_001017422 | chr14 | 50122129 | 50122868 |
|   | 14 | 50115375 | 50123874 NM_007449    | chr14 | 50117970 | 50119017 |
|   | 11 | 50079395 | 50087921 NM_008521    | chr11 | 50080031 | 50080623 |
|   | 14 | 50032504 | 50041003 NM_203508    | chr14 | 50036543 | 50037194 |
|   | 6  | 50033835 | 50042462 NM_019939    | chr6  | 50035309 | 50036038 |
|   | 14 | 49923702 | 49932379 NM_029145    | chr14 | 49931024 | 49931900 |
| X |    | 49862536 | 49871035 NM_001018063 | chrX  | 49867962 | 49868643 |
|   | 11 | 49862754 | 49871293 NM_021540    | chr11 | 49863890 | 49864505 |
| X |    | 49796549 | 49805160 NM_028375    | chrX  | 49797943 | 49798592 |
|   | 11 | 49739256 | 49747757 NM_029004    | chr11 | 49744893 | 49745502 |
|   | 14 | 49601097 | 49609596 NM_207156    | chr14 | 49603197 | 49603860 |
|   | 4  | 49563519 | 49576589 NM_144903    | chr4  | 49570950 | 49571598 |
|   | 4  | 49563519 | 49576589 NM_144903    | chr4  | 49568925 | 49569901 |
|   | 4  | 49525063 | 49533606 NM_007519    | chr4  | 49528115 | 49528666 |
|   | 7  | 49502357 | 49510856 NM_001005232 | chr7  | 49509309 | 49509950 |
|   | 10 | 49469325 | 49483082 NM_010349    | chr10 | 49480821 | 49481473 |
|   | 11 | 49447150 | 49455649 NM_008029    | chr11 | 49448741 | 49449844 |
|   | 2  | 49435323 | 49443822 NM_008449    | chr2  | 49438505 | 49439439 |
|   | 11 | 49401346 | 49409845 NM_207573    | chr11 | 49407437 | 49408321 |
|   | 11 | 49401346 | 49409845 NM_207573    | chr11 | 49402282 | 49402821 |
|   | 11 | 49389172 | 49397671 NM_146469    | chr11 | 49395684 | 49396332 |
|   | 11 | 49372610 | 49381109 NM_001011790 | chr11 | 49378909 | 49379546 |
|   | 11 | 49372610 | 49381109 NM_001011790 | chr11 | 49374374 | 49374977 |
|   | 11 | 49361148 | 49369647 NM_207574    | chr11 | 49366758 | 49367488 |
|   | 11 | 49361148 | 49369647 NM_207574    | chr11 | 49363243 | 49363926 |
|   | 11 | 49307576 | 49316075 NM_001011741 | chr11 | 49307783 | 49308725 |
|   | 11 | 49281276 | 49293289 NM_146467    | chr11 | 49282971 | 49283918 |
|   | 2  | 49267525 | 49276024 NM_172663    | chr2  | 49274359 | 49275305 |

|    |          |          |              |       |          |          |
|----|----------|----------|--------------|-------|----------|----------|
| 11 | 49177957 | 49186456 | NM_147065    | chr11 | 49181325 | 49182044 |
| 11 | 49164836 | 49173335 | NM_146468    | chr11 | 49166500 | 49167946 |
| 11 | 49154971 | 49163470 | NM_206822    | chr11 | 49161334 | 49162428 |
| 11 | 49130720 | 49139223 | NM_146470    | chr11 | 49137128 | 49137722 |
| 11 | 49130720 | 49139223 | NM_146470    | chr11 | 49131714 | 49132667 |
| 11 | 49117573 | 49126072 | NM_146471    | chr11 | 49123873 | 49125160 |
| 9  | 49086857 | 49095391 | NM_010077    | chr9  | 49089526 | 49090094 |
| 4  | 49074562 | 49083085 | NM_178756    | chr4  | 49074966 | 49075680 |
| 11 | 49027969 | 49036512 | NM_172793    | chr11 | 49028446 | 49029204 |
| 11 | 48997439 | 49005938 | NM_146276    | chr11 | 48997745 | 48998765 |
| 11 | 48954681 | 48963180 | NM_146337    | chr11 | 48954670 | 48955300 |
| 11 | 48922379 | 48930895 | BC034256     | chr11 | 48922741 | 48923559 |
| 9  | 48848660 | 48863432 | NM_030709    | chr9  | 48861144 | 48861760 |
| 9  | 48848660 | 48863432 | NM_030709    | chr9  | 48856686 | 48857595 |
| 6  | 48828771 | 48837270 | BC034215     | chr6  | 48835945 | 48836621 |
| 6  | 48765095 | 48778962 | NM_025326    | chr6  | 48772668 | 48773280 |
| 6  | 48767635 | 48776614 | NM_023056    | chr6  | 48772668 | 48773280 |
| 7  | 48744227 | 48755617 | NM_001013368 | chr7  | 48752379 | 48753132 |
| 9  | 48714255 | 48722922 | NM_020274    | chr9  | 48718139 | 48718821 |
| 7  | 48709173 | 48722054 | NM_013808    | chr7  | 48711702 | 48712354 |
| 9  | 48660409 | 48668968 | NM_013561    | chr9  | 48661402 | 48662633 |
| 6  | 48635283 | 48643830 | NM_153175    | chr6  | 48635553 | 48636256 |
| 6  | 48599721 | 48618920 | NM_174990    | chr6  | 48616191 | 48616824 |
| 8  | 48479742 | 48488270 | NM_177304    | chr8  | 48487080 | 48487802 |
| 17 | 48391946 | 48400486 | NM_027452    | chr17 | 48399252 | 48400289 |
| 17 | 48391946 | 48400486 | NM_027452    | chr17 | 48395502 | 48396145 |
| 16 | 48344863 | 48353431 | NM_010816    | chr16 | 48349254 | 48349955 |
| 8  | 48232590 | 48241107 | NM_008391    | chr8  | 48236122 | 48236747 |
| 16 | 48223896 | 48232598 | NM_028615    | chr16 | 48230843 | 48231608 |
| X  | 48035511 | 48048380 | NM_031388    | chrX  | 48042103 | 48042564 |
| X  | 47922597 | 47932229 | NM_001077202 | chrX  | 47931098 | 47931712 |
| 17 | 47869647 | 47878890 | NM_207219    | chr17 | 47876048 | 47876636 |
| 17 | 47872776 | 47881332 | NM_010913    | chr17 | 47876048 | 47876636 |
| 6  | 47844272 | 47852780 | NM_145576    | chr6  | 47849359 | 47850037 |
| 17 | 47805968 | 47814600 | NM_031254    | chr17 | 47812348 | 47813145 |
| 6  | 47740491 | 47751276 | NM_009787    | chr6  | 47746151 | 47746759 |
| 9  | 47532976 | 47541475 | AF061260     | chr9  | 47532970 | 47533431 |
| 8  | 47378278 | 47386835 | NM_016798    | chr8  | 47382233 | 47382916 |
| 19 | 47309478 | 47318114 | NM_177833    | chr19 | 47309597 | 47310204 |
| 11 | 47220226 | 47228945 | NM_011891    | chr11 | 47225177 | 47226203 |
| 6  | 47168033 | 47176540 | NM_025771    | chr6  | 47174083 | 47174736 |
| 8  | 46905017 | 46915394 | NM_126166    | chr8  | 46914750 | 46915307 |
| 17 | 46898019 | 46906518 | NM_029296    | chr17 | 46906020 | 46906488 |
| 8  | 46878489 | 46887001 | NM_153535    | chr8  | 46881617 | 46882367 |
| 8  | 46804784 | 46813283 | NM_008455    | chr8  | 46804845 | 46805506 |
| 7  | 46785416 | 46793957 | NM_021884    | chr7  | 46786446 | 46786958 |
| 17 | 46771140 | 46779685 | NM_172622    | chr17 | 46779120 | 46779597 |

|   |    |          |                       |       |          |          |
|---|----|----------|-----------------------|-------|----------|----------|
|   | 13 | 46736060 | 46744559 NM_175749    | chr13 | 46738750 | 46739485 |
|   | 18 | 46717035 | 46725572 NM_010120    | chr18 | 46720709 | 46721589 |
| X |    | 46668710 | 46677209 NM_146292    | chrX  | 46668963 | 46669680 |
|   | 4  | 46585041 | 46593540 NM_178893    | chr4  | 46585699 | 46586372 |
|   | 11 | 46577641 | 46586149 NM_134248    | chr11 | 46577792 | 46578433 |
|   | 13 | 46507060 | 46515618 NM_026056    | chr13 | 46509098 | 46509875 |
|   | 19 | 46375520 | 46384019 NM_133694    | chr19 | 46378332 | 46379093 |
|   | 19 | 46377968 | 46386467 NM_028627    | chr19 | 46378332 | 46379093 |
|   | 17 | 46347812 | 46356311 NM_178385    | chr17 | 46348985 | 46349592 |
|   | 14 | 46337519 | 46346284 NM_144553    | chr14 | 46340056 | 46340701 |
|   | 11 | 46292358 | 46300895 NM_134250    | chr11 | 46292373 | 46293547 |
|   | 11 | 46274397 | 46282896 NM_025426    | chr11 | 46282487 | 46282864 |
|   | 13 | 46278693 | 46287192 NM_001005422 | chr13 | 46280355 | 46280969 |
|   | 7  | 46103029 | 46111528 U96411       | chr7  | 46109550 | 46110175 |
|   | 7  | 46104033 | 46112534 NM_153677    | chr7  | 46109550 | 46110175 |
|   | 7  | 46103029 | 46111528 U96411       | chr7  | 46103233 | 46103827 |
| X |    | 46030334 | 46048372 NM_177591    | chrX  | 46034129 | 46035094 |
|   | 1  | 45972516 | 45981015 NM_172504    | chr1  | 45973327 | 45973981 |
| X |    | 45970127 | 45978626 NM_207631    | chrX  | 45971396 | 45972008 |
|   | 9  | 45949199 | 45957698 BC082313     | chr9  | 45953731 | 45954390 |
|   | 19 | 45866615 | 45875333 NM_145703    | chr19 | 45868008 | 45868662 |
|   | 16 | 45742934 | 45751433 BC060683     | chr16 | 45749731 | 45750641 |
|   | 9  | 45684383 | 45692893 NM_011526    | chr9  | 45684471 | 45685098 |
|   | 16 | 45659737 | 45668236 NM_172511    | chr16 | 45662000 | 45662593 |
|   | 9  | 45543085 | 45551584 BC027092     | chr9  | 45548558 | 45549215 |
|   | 16 | 45325718 | 45334385 NM_010818    | chr16 | 45325197 | 45325847 |
|   | 8  | 45195811 | 45204310 NM_145745    | chr8  | 45198087 | 45199101 |
|   | 9  | 45115180 | 45123933 NM_022004    | chr9  | 45122121 | 45122744 |
|   | 9  | 45115180 | 45123933 NM_022004    | chr9  | 45117829 | 45118936 |
|   | 7  | 45104339 | 45113061 NM_007645    | chr7  | 45106746 | 45107595 |
|   | 19 | 45094985 | 45103627 NM_053197    | chr19 | 45101549 | 45102388 |
|   | 9  | 45017632 | 45026141 NM_008348    | chr9  | 45022888 | 45023668 |
|   | 9  | 45017632 | 45026141 NM_008348    | chr9  | 45020749 | 45021379 |
|   | 8  | 45018281 | 45026780 NM_001009547 | chr8  | 45018682 | 45019265 |
|   | 13 | 44991470 | 44999969 AY265461     | chr13 | 44999409 | 44999937 |
|   | 19 | 44990201 | 44998700 BC060679     | chr19 | 44996415 | 44997006 |
|   | 9  | 44883748 | 44892247 NM_001013390 | chr9  | 44888122 | 44888740 |
|   | 9  | 44824178 | 44837440 NM_001005421 | chr9  | 44830120 | 44830915 |
|   | 9  | 44787552 | 44796057 NM_007962    | chr9  | 44794163 | 44795262 |
|   | 9  | 44758086 | 44766585 NM_007648    | chr9  | 44759729 | 44760315 |
|   | 9  | 44728833 | 44737421 NM_009850    | chr9  | 44736510 | 44737207 |
|   | 9  | 44726876 | 44735375 NM_013487    | chr9  | 44730063 | 44731193 |
|   | 9  | 44728833 | 44737421 NM_009850    | chr9  | 44730063 | 44731193 |
|   | 15 | 44575492 | 44588532 NM_178765    | chr15 | 44580292 | 44581176 |
|   | 9  | 44547712 | 44559952 NM_027865    | chr9  | 44552719 | 44553404 |
|   | 9  | 44547712 | 44559952 NM_027865    | chr9  | 44549304 | 44549893 |
|   | 19 | 44540783 | 44549350 NM_011720    | chr19 | 44547053 | 44547908 |



|    |          |          |              |       |          |          |
|----|----------|----------|--------------|-------|----------|----------|
| 4  | 44316017 | 44324585 | NM_010790    | chr4  | 44316397 | 44317157 |
| 17 | 44275137 | 44283852 | NM_009820    | chr17 | 44277142 | 44277769 |
| 11 | 44237486 | 44246008 | NM_008352    | chr11 | 44243933 | 44244664 |
| 1  | 44160921 | 44169477 | NM_207281    | chr1  | 44165043 | 44165741 |
| 5  | 44107387 | 44115886 | BC047214     | chr5  | 44112743 | 44113346 |
| 7  | 44087479 | 44096011 | NM_010639    | chr7  | 44088033 | 44088918 |
| 16 | 44055830 | 44064351 | NM_007508    | chr16 | 44061906 | 44062532 |
| 15 | 44020307 | 44028823 | NM_013696    | chr15 | 44026489 | 44027766 |
| 7  | 43974721 | 43983224 | NM_010114    | chr7  | 43981760 | 43982411 |
| 14 | 43904072 | 43913196 | NM_008964    | chr14 | 43912511 | 43913176 |
| 7  | 43874720 | 43883245 | NM_010644    | chr7  | 43880376 | 43881020 |
| 4  | 43855118 | 43863617 | NM_019475    | chr4  | 43860492 | 43861110 |
| 4  | 43840034 | 43848538 | NM_019474    | chr4  | 43842866 | 43843834 |
| 19 | 43829619 | 43838118 | NM_013806    | chr19 | 43837513 | 43838172 |
| 13 | 43790157 | 43798674 | NM_009856    | chr13 | 43792771 | 43793364 |
| 14 | 43778753 | 43787252 | NM_008962    | chr14 | 43783984 | 43784851 |
| 15 | 43695333 | 43706103 | NM_175502    | chr15 | 43702029 | 43702620 |
| 7  | 43686600 | 43696154 | NM_011177    | chr7  | 43693525 | 43694309 |
| 4  | 43672153 | 43683550 | NM_001007463 | chr4  | 43680732 | 43681442 |
| 4  | 43679020 | 43687542 | BC092136     | chr4  | 43680732 | 43681442 |
| 16 | 43675553 | 43684052 | NM_007877    | chr16 | 43678090 | 43678886 |
| 7  | 43654003 | 43668118 | NM_008940    | chr7  | 43666683 | 43667445 |
| 4  | 43577734 | 43586277 | NM_013497    | chr4  | 43581710 | 43582613 |
| 4  | 43580856 | 43589355 | NM_011602    | chr4  | 43581710 | 43582613 |
| 5  | 43516207 | 43524726 | NM_175937    | chr5  | 43521998 | 43522634 |
| 7  | 43496781 | 43505280 | NM_028236    | chr7  | 43501591 | 43502266 |
| 1  | 43472096 | 43480595 | BC011071     | chr1  | 43478658 | 43479261 |
| 7  | 43469267 | 43480340 | NM_028913    | chr7  | 43476343 | 43477031 |
| 17 | 43410054 | 43418959 | NM_030598    | chr17 | 43417707 | 43418450 |
| 17 | 43410054 | 43418959 | NM_030598    | chr17 | 43410461 | 43411344 |
| 18 | 43327008 | 43335527 | NM_178749    | chr18 | 43333401 | 43334038 |
| 11 | 43311729 | 43326816 | NM_026979    | chr11 | 43314158 | 43315145 |
| 6  | 43236658 | 43245169 | NM_130869    | chr6  | 43238320 | 43239064 |
| 7  | 43213325 | 43221824 | NM_145581    | chr7  | 43220466 | 43221420 |
| 7  | 43213325 | 43221824 | NM_145581    | chr7  | 43219589 | 43220194 |
| 10 | 43206510 | 43215009 | BC096419     | chr10 | 43206548 | 43207099 |
| 18 | 43182241 | 43190802 | NM_028392    | chr18 | 43187089 | 43187890 |
| 18 | 43182241 | 43190802 | NM_028392    | chr18 | 43182603 | 43183749 |
| 6  | 43159185 | 43167684 | NM_146370    | chr6  | 43165740 | 43166347 |
| 13 | 43127811 | 43139359 | NM_001005748 | chr13 | 43137494 | 43138980 |
| 6  | 43125253 | 43133752 | NM_146653    | chr6  | 43131466 | 43132213 |
| 13 | 43127811 | 43139359 | NM_001005748 | chr13 | 43130665 | 43131668 |
| 17 | 43124480 | 43133088 | NM_018887    | chr17 | 43127161 | 43127853 |
| 17 | 43127571 | 43136237 | NM_028711    | chr17 | 43127161 | 43127853 |
| 1  | 43095289 | 43103801 | AF153340     | chr1  | 43095337 | 43096355 |
| 17 | 43090855 | 43099354 | NM_198418    | chr17 | 43090956 | 43091994 |
| 6  | 43076869 | 43085368 | NM_146654    | chr6  | 43083008 | 43084109 |

|    |          |          |              |       |          |          |
|----|----------|----------|--------------|-------|----------|----------|
| 6  | 43039351 | 43047850 | NM_146655    | chr6  | 43045629 | 43046546 |
| 17 | 43025500 | 43034260 | NM_013737    | chr17 | 43029591 | 43030128 |
| 4  | 42892796 | 42901303 | NM_177785    | chr4  | 42893121 | 42894031 |
| 6  | 42835132 | 42843631 | NM_146988    | chr6  | 42841814 | 42842564 |
| 14 | 42830936 | 42839435 | U72672       | chr14 | 42837893 | 42839073 |
| 14 | 42830936 | 42839435 | U72672       | chr14 | 42834274 | 42835182 |
| 4  | 42775779 | 42784278 | NM_011888    | chr4  | 42783806 | 42784784 |
| 4  | 42775779 | 42784278 | NM_011888    | chr4  | 42776706 | 42777705 |
| 6  | 42741080 | 42749579 | NM_146445    | chr6  | 42741166 | 42741817 |
| 9  | 42692867 | 42701366 | NM_175481    | chr9  | 42697130 | 42697709 |
| 6  | 42667646 | 42676145 | NM_001011799 | chr6  | 42672817 | 42674396 |
| 19 | 42659360 | 42672059 | NM_053083    | chr19 | 42659364 | 42660098 |
| 18 | 42631460 | 42640000 | NM_001039474 | chr18 | 42632287 | 42632759 |
| 8  | 42630044 | 42638543 | NM_001005863 | chr8  | 42632136 | 42632792 |
| 18 | 42560952 | 42569451 | BC089582     | chr18 | 42567515 | 42567925 |
| 18 | 42560952 | 42569451 | BC089582     | chr18 | 42561541 | 42562616 |
| 10 | 42543132 | 42551631 | NM_172938    | chr10 | 42550345 | 42551180 |
| 19 | 42482595 | 42491094 | NM_145123    | chr19 | 42487974 | 42488643 |
| 19 | 42482595 | 42491094 | NM_145123    | chr19 | 42482506 | 42483285 |
| 6  | 42399308 | 42407807 | NM_146987    | chr6  | 42401800 | 42402405 |
| 6  | 42323845 | 42337635 | NM_199159    | chr6  | 42336306 | 42337235 |
| 18 | 42320145 | 42328659 | BC110559     | chr18 | 42321547 | 42322128 |
| 6  | 42210292 | 42218826 | NM_013491    | chr6  | 42217461 | 42218147 |
| 18 | 42173640 | 42182182 | NM_172966    | chr18 | 42180487 | 42181169 |
| 9  | 42148425 | 42156924 | NM_009347    | chr9  | 42155242 | 42156008 |
| 9  | 42148425 | 42156924 | NM_009347    | chr9  | 42152646 | 42153464 |
| 9  | 42148425 | 42156924 | NM_009347    | chr9  | 42148619 | 42149340 |
| 4  | 41979785 | 41988284 | BC051472     | chr4  | 41985807 | 41986478 |
| 4  | 41979785 | 41988284 | BC051472     | chr4  | 41980611 | 41982544 |
| 4  | 41956224 | 41968645 | NM_001048179 | chr4  | 41957973 | 41959241 |
| 4  | 41927285 | 41935824 | NM_011014    | chr4  | 41932908 | 41933583 |
| 19 | 41898907 | 41907443 | NM_177603    | chr19 | 41904263 | 41904978 |
| 6  | 41875235 | 41883739 | NM_027832    | chr6  | 41882922 | 41883718 |
| 9  | 41872785 | 41881284 | NM_011436    | chr9  | 41879426 | 41880068 |
| 3  | 41833213 | 41843732 | NM_028667    | chr3  | 41836045 | 41836854 |
| 3  | 41836531 | 41845030 | BC060271     | chr3  | 41836045 | 41836854 |
| 6  | 41783846 | 41792345 | NM_032542    | chr6  | 41785431 | 41786106 |
| 4  | 41755681 | 41764180 | NM_027993    | chr4  | 41762193 | 41763224 |
| 10 | 41741330 | 41749829 | NM_011561    | chr10 | 41747125 | 41747878 |
| 4  | 41689229 | 41702435 | NM_028624    | chr4  | 41701135 | 41701891 |
| 6  | 41607831 | 41616376 | NM_001007572 | chr6  | 41608952 | 41609577 |
| 6  | 41563406 | 41571942 | NM_022413    | chr6  | 41569403 | 41570009 |
| 6  | 41529175 | 41545324 | NM_007680    | chr6  | 41538709 | 41539535 |
| 6  | 41461824 | 41475330 | BC034887     | chr6  | 41469550 | 41470287 |
| 10 | 41176256 | 41184767 | NM_009213    | chr10 | 41178286 | 41178919 |
| 13 | 41118463 | 41127157 | NM_008104    | chr13 | 41119093 | 41119792 |
| 13 | 41088115 | 41096616 | BC050009     | chr13 | 41088646 | 41089291 |

|    |          |          |              |       |          |          |
|----|----------|----------|--------------|-------|----------|----------|
| 19 | 41076586 | 41085232 | NM_009345    | chr19 | 41083357 | 41084313 |
| 13 | 41078934 | 41087433 | NM_008547    | chr13 | 41082232 | 41082873 |
| 19 | 41076586 | 41085232 | NM_009345    | chr19 | 41081393 | 41081874 |
| 13 | 41078934 | 41087433 | NM_008547    | chr13 | 41081070 | 41081825 |
| 19 | 41076586 | 41085232 | NM_009345    | chr19 | 41076989 | 41077359 |
| 4  | 40961938 | 40970444 | NM_025498    | chr4  | 40969910 | 40970395 |
| 13 | 40922575 | 40931125 | NM_133219    | chr13 | 40923930 | 40924560 |
| 3  | 40799420 | 40807980 | NM_178386    | chr3  | 40802660 | 40803348 |
| 11 | 40594916 | 40604709 | NM_009831    | chr11 | 40596784 | 40597806 |
| 19 | 40564548 | 40573123 | NM_178362    | chr19 | 40570699 | 40571535 |
| 6  | 40494964 | 40503463 | NM_146383    | chr6  | 40501083 | 40501942 |
| 9  | 40431033 | 40439718 | NM_133733    | chr9  | 40431541 | 40432078 |
| 1  | 40404222 | 40413051 | NM_008365    | chr1  | 40405301 | 40406214 |
| 13 | 40369917 | 40378416 | AF548110     | chr13 | 40374334 | 40375078 |
| 10 | 40313427 | 40323519 | NM_027442    | chr10 | 40320609 | 40321635 |
| 6  | 40249102 | 40257614 | NM_023538    | chr6  | 40250617 | 40251245 |
| 14 | 40089349 | 40099876 | NM_009160    | chr14 | 40092941 | 40094089 |
| 5  | 40041225 | 40049724 | NM_010474    | chr5  | 40046619 | 40047212 |
| 6  | 40033860 | 40042359 | NM_001004182 | chr6  | 40036934 | 40038018 |
| 14 | 40034501 | 40043000 | NM_023134    | chr14 | 40036016 | 40036632 |
| 1  | 40023314 | 40031837 | NM_010555    | chr1  | 40024856 | 40025443 |
| 5  | 39930343 | 39938842 | BC009133     | chr5  | 39936878 | 39937913 |
| 18 | 39893471 | 39901991 | NM_011033    | chr18 | 39900110 | 39901110 |
| 9  | 39876031 | 39884530 | NM_146855    | chr9  | 39879261 | 39879899 |
| 9  | 39876031 | 39884530 | NM_146855    | chr9  | 39876397 | 39877095 |
| 1  | 39839716 | 39848215 | NM_008696    | chr1  | 39847409 | 39848094 |
| 10 | 39767727 | 39776226 | BC052877     | chr10 | 39773967 | 39774559 |
| 10 | 39767727 | 39776226 | BC052877     | chr10 | 39772801 | 39773577 |
| 9  | 39749322 | 39763600 | NM_147108    | chr9  | 39751045 | 39751653 |
| 15 | 39684963 | 39693541 | NM_022722    | chr15 | 39687648 | 39688314 |
| 15 | 39684963 | 39693541 | NM_022722    | chr15 | 39686335 | 39687274 |
| 10 | 39673563 | 39682062 | NM_001001489 | chr10 | 39674867 | 39675579 |
| 8  | 39419075 | 39427574 | NM_145841    | chr8  | 39426547 | 39427290 |
| 9  | 39358115 | 39366614 | NM_146505    | chr9  | 39363351 | 39364151 |
| 1  | 39306695 | 39315194 | NM_053257    | chr1  | 39306761 | 39307483 |
| 6  | 38842593 | 38851221 | NM_011539    | chr6  | 38847314 | 38847985 |
| 2  | 38813485 | 38822839 | NM_029687    | chr2  | 38813710 | 38814323 |
| 1  | 38763262 | 38771761 | NM_001029878 | chr1  | 38770330 | 38770939 |
| X  | 38741189 | 38749796 | NM_011364    | chrX  | 38745418 | 38746069 |
| 9  | 38743505 | 38752004 | NM_146746    | chr9  | 38744052 | 38744649 |
| 9  | 38731114 | 38739613 | NM_146442    | chr9  | 38732491 | 38733447 |
| 16 | 38717014 | 38725533 | NM_178924    | chr16 | 38723266 | 38724052 |
| 10 | 38648993 | 38657756 | NM_010681    | chr10 | 38655743 | 38656346 |
| 2  | 38530297 | 38542513 | NM_139051    | chr2  | 38532977 | 38533739 |
| 9  | 38462869 | 38476984 | NM_172767    | chr9  | 38465604 | 38466403 |
| 9  | 38406462 | 38430052 | NM_146375    | chr9  | 38424000 | 38424587 |
| 12 | 38384603 | 38393470 | NM_178681    | chr12 | 38391309 | 38392087 |

|    |          |          |              |       |          |          |
|----|----------|----------|--------------|-------|----------|----------|
| 12 | 38384603 | 38393470 | NM_178681    | chr12 | 38389805 | 38390393 |
| 9  | 38283468 | 38291967 | NM_146811    | chr9  | 38283987 | 38284589 |
| 9  | 38260605 | 38276804 | NM_146873    | chr9  | 38264367 | 38265020 |
| 13 | 38197950 | 38214932 | NM_026382    | chr13 | 38198297 | 38199171 |
| 18 | 38121037 | 38129536 | NM_139206    | chr18 | 38125407 | 38126066 |
| 6  | 38051489 | 38060182 | NM_080467    | chr6  | 38052050 | 38053086 |
| 5  | 38002813 | 38011388 | NM_022416    | chr5  | 38009284 | 38009928 |
| 7  | 37928756 | 37943047 | NM_024413    | chr7  | 37941116 | 37941708 |
| 18 | 37935053 | 37948127 | NM_033582    | chr18 | 37935860 | 37936415 |
| 3  | 37900259 | 37908777 | NM_024175    | chr3  | 37907154 | 37908009 |
| 3  | 37900259 | 37908777 | NM_024175    | chr3  | 37904457 | 37904863 |
| 1  | 37810752 | 37819262 | NM_001037918 | chr1  | 37818305 | 37819091 |
| 16 | 37781628 | 37790138 | NM_177093    | chr16 | 37786979 | 37787903 |
| 19 | 37756998 | 37765527 | NM_007811    | chr19 | 37759801 | 37760521 |
| 15 | 37734497 | 37742996 | NM_134094    | chr15 | 37734846 | 37735706 |
| 17 | 37688530 | 37697029 | NM_146867    | chr17 | 37696639 | 37696993 |
| 16 | 37690294 | 37698812 | NM_008047    | chr16 | 37692562 | 37693255 |
| 17 | 37661145 | 37669644 | NM_146327    | chr17 | 37665438 | 37666057 |
| 19 | 37609562 | 37618102 | NM_175353    | chr19 | 37612589 | 37613413 |
| 9  | 37598491 | 37606990 | NM_146417    | chr9  | 37603559 | 37604639 |
| 3  | 37566304 | 37574803 | AY027557     | chr3  | 37572718 | 37573652 |
| 8  | 37557378 | 37570967 | NM_172911    | chr8  | 37558874 | 37559661 |
| 17 | 37525621 | 37534120 | NM_206816    | chr17 | 37530485 | 37531102 |
| 16 | 37493460 | 37502036 | NM_013547    | chr16 | 37495747 | 37496588 |
| 9  | 37478153 | 37486652 | NM_207664    | chr9  | 37482462 | 37483321 |
| 9  | 37459449 | 37467948 | NM_030553    | chr9  | 37462584 | 37463243 |
| 15 | 37401426 | 37409932 | BC011162     | chr15 | 37408449 | 37409063 |
| 18 | 37384972 | 37393471 | NM_053126    | chr18 | 37390915 | 37391546 |
| 5  | 37333165 | 37341664 | NM_178394    | chr5  | 37332855 | 37333963 |
| 9  | 37299369 | 37307868 | AF156856     | chr9  | 37307670 | 37308458 |
| 9  | 37299881 | 37308480 | NM_022029    | chr9  | 37307670 | 37308458 |
| 1  | 37157807 | 37166307 | NM_009918    | chr1  | 37158088 | 37159187 |
| 5  | 37150819 | 37159318 | NM_172994    | chr5  | 37151868 | 37152602 |
| 9  | 37145703 | 37158167 | NM_028783    | chr9  | 37151515 | 37152672 |
| 9  | 37111277 | 37119776 | NM_175189    | chr9  | 37111707 | 37112261 |
| 13 | 37054171 | 37062670 | NM_028784    | chr13 | 37059964 | 37060936 |
| 13 | 37054171 | 37062670 | NM_028784    | chr13 | 37054208 | 37054978 |
| 17 | 37007603 | 37016102 | NM_146511    | chr17 | 37013991 | 37014609 |
| 1  | 36965142 | 36976361 | NM_177334    | chr1  | 36971549 | 36972179 |
| 17 | 36869303 | 36881291 | NM_146510    | chr17 | 36872404 | 36873058 |
| 17 | 36872287 | 36880795 | NM_013819    | chr17 | 36872404 | 36873058 |
| 17 | 36803520 | 36812019 | NM_001011518 | chr17 | 36806943 | 36807595 |
| 19 | 36796991 | 36807797 | NM_016854    | chr19 | 36797505 | 36798118 |
| 2  | 36722920 | 36733603 | NM_146939    | chr2  | 36730488 | 36731213 |
| 12 | 36720484 | 36734468 | NM_027699    | chr12 | 36726025 | 36726550 |
| 2  | 36710356 | 36718855 | NM_146941    | chr2  | 36714540 | 36715304 |
| 2  | 36710356 | 36718855 | NM_146941    | chr2  | 36711055 | 36711901 |

|    |          |          |              |       |          |          |
|----|----------|----------|--------------|-------|----------|----------|
| 17 | 36691790 | 36707925 | NM_182714    | chr17 | 36706619 | 36707698 |
| 17 | 36691790 | 36707925 | NM_182714    | chr17 | 36694142 | 36694697 |
| 15 | 36550658 | 36559551 | NM_008774    | chr15 | 36551229 | 36551925 |
| 15 | 36497658 | 36506162 | NM_025712    | chr15 | 36502903 | 36503565 |
| 16 | 36478874 | 36487373 | NM_013803    | chr16 | 36486200 | 36487136 |
| 15 | 36438841 | 36447375 | NM_175134    | chr15 | 36445016 | 36445602 |
| 2  | 36384609 | 36393108 | NM_146628    | chr2  | 36390501 | 36391336 |
| 17 | 36277751 | 36286250 | NM_177636    | chr17 | 36278784 | 36279677 |
| 1  | 36246300 | 36254826 | NM_145996    | chr1  | 36254085 | 36254717 |
| 18 | 36226177 | 36234676 | BC100467     | chr18 | 36234057 | 36234686 |
| 15 | 36149103 | 36157602 | AF181253     | chr15 | 36152530 | 36153173 |
| 3  | 36119124 | 36130426 | NM_033623    | chr3  | 36128906 | 36129604 |
| 18 | 36098287 | 36106786 | BC062930     | chr18 | 36099568 | 36100181 |
| 5  | 36038308 | 36046958 | NM_194344    | chr5  | 36042927 | 36043514 |
| 4  | 36031584 | 36040083 | NM_175516    | chr4  | 36039711 | 36040057 |
| 14 | 36007091 | 36015703 | NM_130878    | chr14 | 36009022 | 36009631 |
| 13 | 35995782 | 36005013 | BC064755     | chr13 | 35999972 | 36000651 |
| 14 | 35989271 | 35997770 | BC049999     | chr14 | 35993189 | 35993980 |
| 14 | 35989271 | 35997770 | BC049999     | chr14 | 35992109 | 35992797 |
| 14 | 35973290 | 35981789 | NM_173418    | chr14 | 35978049 | 35978889 |
| 14 | 35957690 | 35966205 | NM_021340    | chr14 | 35960778 | 35961284 |
| 14 | 35960076 | 35968575 | NM_146245    | chr14 | 35960778 | 35961284 |
| 18 | 35863954 | 35872504 | BC046640     | chr18 | 35865421 | 35866044 |
| 18 | 35826581 | 35835095 | NM_029669    | chr18 | 35831837 | 35832465 |
| 7  | 35821007 | 35829514 | BC106165     | chr7  | 35826550 | 35827162 |
| 17 | 35795703 | 35804204 | NM_008208    | chr17 | 35802395 | 35802998 |
| 17 | 35795703 | 35804204 | NM_008208    | chr17 | 35799007 | 35799812 |
| 11 | 35639498 | 35647997 | NM_001004147 | chr11 | 35639602 | 35640516 |
| 12 | 35563833 | 35572344 | NM_029294    | chr12 | 35566195 | 35566777 |
| 7  | 35460612 | 35469198 | NM_178704    | chr7  | 35462178 | 35462845 |
| 6  | 35253763 | 35262293 | NM_173375    | chr6  | 35261700 | 35262090 |
| 6  | 35253763 | 35262293 | NM_173375    | chr6  | 35254693 | 35255603 |
| 6  | 35235756 | 35244278 | NM_172892    | chr6  | 35240572 | 35241164 |
| 18 | 35238863 | 35247405 | NM_009818    | chr18 | 35239865 | 35240727 |
| 18 | 34960632 | 34969131 | NM_144865    | chr18 | 34966786 | 34967500 |
| 14 | 34918406 | 34926953 | NM_175008    | chr14 | 34923826 | 34924497 |
| 2  | 34920170 | 34928682 | NM_178885    | chr2  | 34921966 | 34922753 |
| 16 | 34908611 | 34917110 | AF314149     | chr16 | 34913020 | 34913624 |
| 2  | 34880906 | 34889405 | NM_010406    | chr2  | 34887347 | 34888322 |
| 6  | 34844315 | 34853668 | NM_009292    | chr6  | 34849405 | 34850160 |
| 17 | 34807458 | 34819403 | NM_013693    | chr17 | 34818209 | 34819125 |
| 15 | 34775944 | 34785137 | NM_181317    | chr15 | 34777130 | 34777849 |
| 9  | 34676681 | 34685180 | NM_001002772 | chr9  | 34681264 | 34682262 |
| 9  | 34676681 | 34685180 | NM_001002772 | chr9  | 34676856 | 34677763 |
| 14 | 34638966 | 34647467 | NM_001033766 | chr14 | 34639259 | 34639900 |
| 16 | 34564958 | 34573457 | NM_030744    | chr16 | 34570261 | 34570876 |
| 17 | 34516536 | 34525035 | NM_023557    | chr17 | 34522896 | 34523715 |

|   |    |          |          |              |       |          |          |
|---|----|----------|----------|--------------|-------|----------|----------|
|   | 7  | 34454502 | 34463001 | AB106878     | chr7  | 34459539 | 34460157 |
|   | 7  | 34359102 | 34370269 | NM_146188    | chr7  | 34369436 | 34370048 |
|   | 6  | 34336518 | 34345047 | NM_009731    | chr6  | 34340938 | 34341557 |
|   | 19 | 34277621 | 34288682 | AB066213     | chr19 | 34280135 | 34280911 |
|   | 4  | 34266163 | 34274707 | BC079564     | chr4  | 34271729 | 34272339 |
|   | 19 | 34229401 | 34238038 | NM_024204    | chr19 | 34234001 | 34234657 |
|   | 11 | 34208822 | 34217321 | NM_001025382 | chr11 | 34209708 | 34210333 |
| X |    | 34143837 | 34152397 | NM_023894    | chrX  | 34147098 | 34147746 |
|   | 6  | 34104638 | 34113212 | NM_021435    | chr6  | 34111525 | 34112191 |
|   | 1  | 34098878 | 34107377 | AF396877     | chr1  | 34100414 | 34101189 |
|   | 17 | 33978867 | 33987366 | NM_201405    | chr17 | 33986119 | 33987038 |
|   | 17 | 33978867 | 33987366 | NM_201405    | chr17 | 33980995 | 33981577 |
|   | 17 | 33949727 | 33958226 | NM_010381    | chr17 | 33953637 | 33954274 |
|   | 13 | 33940929 | 33949461 | NM_009254    | chr13 | 33942072 | 33942772 |
|   | 17 | 33865432 | 33873967 | NM_207105    | chr17 | 33866348 | 33866854 |
|   | 1  | 33849668 | 33858167 | NM_177235    | chr1  | 33856329 | 33856924 |
|   | 1  | 33849668 | 33858167 | NM_177235    | chr1  | 33849015 | 33850096 |
|   | 10 | 33814889 | 33823398 | NM_175449    | chr10 | 33819943 | 33820932 |
| X |    | 33814492 | 33822991 | NM_001039695 | chrX  | 33819123 | 33819785 |
|   | 11 | 33740716 | 33749527 | NM_027398    | chr11 | 33744312 | 33745112 |
| X |    | 33732451 | 33740970 | NM_021300    | chrX  | 33737177 | 33737951 |
|   | 12 | 33727027 | 33735526 | NM_028139    | chr12 | 33729731 | 33730416 |
|   | 17 | 33689069 | 33705385 | NM_008206    | chr17 | 33696518 | 33697629 |
| X |    | 33690820 | 33699404 | NM_001039688 | chrX  | 33695525 | 33696288 |
|   | 12 | 33675623 | 33684122 | NM_001024478 | chr12 | 33680735 | 33681592 |
|   | 13 | 33662868 | 33671367 | NM_001076790 | chr13 | 33666417 | 33667050 |
|   | 16 | 33639203 | 33647702 | NM_175256    | chr16 | 33645545 | 33646260 |
| X |    | 33639987 | 33648486 | NM_001033234 | chrX  | 33644978 | 33645583 |
|   | 4  | 33515851 | 33524350 | NM_001034867 | chr4  | 33515365 | 33516247 |
| X |    | 33514130 | 33522629 | NM_026055    | chrX  | 33514744 | 33515473 |
|   | 13 | 33486255 | 33494779 | NM_011455    | chr13 | 33490136 | 33490792 |
|   | 5  | 33415076 | 33423607 | NM_019810    | chr5  | 33415077 | 33416109 |
|   | 17 | 33385819 | 33394455 | NM_020581    | chr17 | 33388244 | 33389231 |
|   | 17 | 33238828 | 33247327 | NM_001002842 | chr17 | 33246775 | 33247301 |
|   | 13 | 33194424 | 33202923 | NM_011460    | chr13 | 33199468 | 33200196 |
|   | 14 | 33181986 | 33190485 | NM_183278    | chr14 | 33186599 | 33187325 |
|   | 18 | 33076170 | 33084867 | NM_009793    | chr18 | 33083726 | 33084647 |
|   | 13 | 33028879 | 33037518 | NM_011452    | chr13 | 33030493 | 33031111 |
|   | 3  | 32925825 | 32934932 | NM_029017    | chr3  | 32932393 | 32933006 |
|   | 14 | 32909074 | 32917616 | NM_013473    | chr14 | 32909229 | 32909980 |
|   | 17 | 32873992 | 32882675 | NM_177719    | chr17 | 32874196 | 32874786 |
|   | 13 | 32803495 | 32812745 | NM_030215    | chr13 | 32809020 | 32809712 |
|   | 12 | 32790958 | 32799858 | NM_020272    | chr12 | 32797711 | 32798310 |
| X |    | 32753854 | 32762451 | NM_028894    | chrX  | 32758095 | 32758895 |
|   | 16 | 32714656 | 32723181 | NM_146071    | chr16 | 32721436 | 32721785 |
|   | 17 | 32683280 | 32691788 | NM_130882    | chr17 | 32685102 | 32686216 |
|   | 8  | 32549597 | 32560084 | NM_025869    | chr8  | 32559206 | 32560061 |

|    |          |          |              |       |          |          |
|----|----------|----------|--------------|-------|----------|----------|
| 2  | 32513628 | 32522161 | NM_010236    | chr2  | 32519439 | 32520335 |
| 2  | 32462604 | 32471201 | NM_007932    | chr2  | 32464915 | 32465626 |
| 17 | 32418969 | 32427488 | NM_134127    | chr17 | 32421756 | 32422295 |
| 18 | 32177472 | 32185971 | NM_032394    | chr18 | 32182793 | 32183369 |
| 17 | 32180858 | 32189357 | NM_177307    | chr17 | 32181015 | 32181358 |
| 11 | 32165771 | 32189466 | NM_001033981 | chr11 | 32180773 | 32181425 |
| 19 | 32166638 | 32180146 | NM_018830    | chr19 | 32168320 | 32168917 |
| 9  | 32137550 | 32148383 | NM_019659    | chr9  | 32145871 | 32146473 |
| 14 | 32129272 | 32137771 | AY541447     | chr14 | 32132030 | 32132831 |
| 15 | 32115876 | 32124375 | NM_020503    | chr15 | 32121839 | 32122620 |
| 19 | 31928761 | 31937309 | AY566862     | chr19 | 31934397 | 31935540 |
| 12 | 31845349 | 31853954 | NM_008482    | chr12 | 31853179 | 31853776 |
| 9  | 31660139 | 31668827 | NM_013800    | chr9  | 31660134 | 31661038 |
| 13 | 31627244 | 31635743 | NM_010225    | chr13 | 31628546 | 31629200 |
| 15 | 31507494 | 31516000 | NM_181588    | chr15 | 31513792 | 31514553 |
| 14 | 31422936 | 31431435 | NM_001001796 | chr14 | 31430464 | 31431176 |
| 14 | 31424628 | 31433127 | NM_177134    | chr14 | 31430464 | 31431176 |
| 5  | 31319240 | 31333891 | NM_023525    | chr5  | 31320363 | 31320989 |
| 5  | 31234300 | 31242843 | NM_016703    | chr5  | 31236715 | 31237350 |
| 16 | 31192470 | 31201024 | NM_025800    | chr16 | 31199101 | 31199759 |
| 17 | 31108961 | 31117493 | NM_008804    | chr17 | 31110637 | 31111343 |
| 17 | 31108961 | 31117493 | NM_008804    | chr17 | 31108937 | 31109728 |
| 7  | 31005521 | 31014020 | NM_207262    | chr7  | 31011831 | 31012676 |
| 17 | 30889563 | 30898065 | NM_009362    | chr17 | 30891057 | 30891738 |
| 3  | 30836157 | 30844707 | NM_027941    | chr3  | 30835764 | 30836547 |
| 12 | 30716162 | 30724661 | NM_009417    | chr12 | 30716849 | 30717478 |
| 17 | 30622879 | 30631378 | NM_021332    | chr17 | 30629807 | 30630636 |
| 7  | 30586528 | 30595102 | NM_009845    | chr7  | 30588128 | 30589478 |
| 6  | 30555020 | 30563519 | NM_144537    | chr6  | 30561378 | 30562207 |
| 12 | 30518088 | 30526587 | NM_181395    | chr12 | 30519386 | 30520113 |
| 5  | 30432400 | 30440900 | BC113783     | chr5  | 30437407 | 30438088 |
| 5  | 30432400 | 30440900 | BC113783     | chr5  | 30433140 | 30433747 |
| 7  | 30294987 | 30306663 | NM_029274    | chr7  | 30302805 | 30303626 |
| 19 | 30292939 | 30301453 | NM_010776    | chr19 | 30299182 | 30299770 |
| 7  | 30294987 | 30306663 | NM_029274    | chr7  | 30296536 | 30297290 |
| 19 | 30292939 | 30301453 | NM_010776    | chr19 | 30293435 | 30294945 |
| 17 | 30254879 | 30263378 | NM_172618    | chr17 | 30261076 | 30261730 |
| 16 | 30184780 | 30193279 | NM_027904    | chr16 | 30187660 | 30189087 |
| 2  | 30082558 | 30091245 | NM_172267    | chr2  | 30088576 | 30089429 |
| 19 | 30063787 | 30072286 | NM_025741    | chr19 | 30071327 | 30072016 |
| 19 | 30063787 | 30072286 | NM_025741    | chr19 | 30066358 | 30067428 |
| 16 | 29979104 | 29987603 | NM_008235    | chr16 | 29980130 | 29980762 |
| 7  | 29868997 | 29884487 | NM_011980    | chr7  | 29879163 | 29880330 |
| 11 | 29601316 | 29609815 | BC032192     | chr11 | 29601666 | 29602356 |
| 14 | 29477384 | 29485902 | NM_177815    | chr14 | 29477718 | 29478351 |
| 6  | 29411793 | 29420309 | NM_025381    | chr6  | 29414480 | 29415094 |
| 16 | 29295915 | 29304479 | NM_175650    | chr16 | 29298510 | 29299602 |

|    |          |                       |       |          |          |
|----|----------|-----------------------|-------|----------|----------|
| 17 | 28962304 | 28970809 NM_153166    | chr17 | 28969488 | 28970169 |
| 14 | 28909268 | 28917767 BC058783     | chr14 | 28913233 | 28914416 |
| 7  | 28886662 | 28895291 NM_026545    | chr7  | 28893767 | 28894474 |
| 14 | 28844312 | 28854141 NM_175343    | chr14 | 28847910 | 28849043 |
| 14 | 28835319 | 28843905 NM_019583    | chr14 | 28834703 | 28835829 |
| 11 | 28747204 | 28755709 AY251056     | chr11 | 28752068 | 28752649 |
| 19 | 28603918 | 28612417 AY220846     | chr19 | 28605988 | 28606490 |
| 19 | 28603918 | 28612417 AY220846     | chr19 | 28604287 | 28604899 |
| 11 | 28481247 | 28490324 NM_181577    | chr11 | 28486172 | 28486777 |
| 7  | 28469527 | 28478042 NM_022432    | chr7  | 28475557 | 28476307 |
| 17 | 28412931 | 28421599 NM_011951    | chr17 | 28420096 | 28420883 |
| 17 | 28415077 | 28423576 NM_146076    | chr17 | 28420096 | 28420883 |
| 2  | 28281960 | 28292583 NM_080452    | chr2  | 28283904 | 28284834 |
| 7  | 28216621 | 28225120 NM_001024673 | chr7  | 28224152 | 28224832 |
| 5  | 28166734 | 28175541 NM_008314    | chr5  | 28174057 | 28174667 |
| 5  | 28166734 | 28175541 NM_008314    | chr5  | 28167348 | 28168270 |
| 15 | 28142355 | 28150854 NM_133365    | chr15 | 28148715 | 28149559 |
| 6  | 28073706 | 28090379 NM_008174    | chr6  | 28080663 | 28081266 |
| 2  | 28021685 | 28030396 NM_019498    | chr2  | 28023152 | 28024198 |
| 13 | 28017687 | 28026187 NM_011165    | chr13 | 28018883 | 28020052 |
| 14 | 27839265 | 27847920 NM_176920    | chr14 | 27842776 | 27843798 |
| 5  | 27829680 | 27838227 NM_028561    | chr5  | 27830963 | 27831576 |
| 15 | 27623724 | 27632240 NM_198301    | chr15 | 27628814 | 27629492 |
| 15 | 27558696 | 27567195 NM_001013792 | chr15 | 27564536 | 27565276 |
| 2  | 27525301 | 27535091 U77684       | chr2  | 27527889 | 27528725 |
| 13 | 27518165 | 27526680 NM_023741    | chr13 | 27524329 | 27524978 |
| 13 | 27518165 | 27526680 NM_023741    | chr13 | 27520860 | 27521659 |
| 17 | 27453979 | 27462540 NM_013891    | chr17 | 27461469 | 27462257 |
| 5  | 27374180 | 27382679 NM_207282    | chr5  | 27375972 | 27376685 |
| 16 | 27298216 | 27306715 NM_026202    | chr16 | 27300643 | 27301273 |
| 16 | 27282920 | 27291472 NM_198166    | chr16 | 27288826 | 27289881 |
| 16 | 27216722 | 27225385 NM_198112    | chr16 | 27221916 | 27222569 |
| 7  | 27202084 | 27219081 NM_019412    | chr7  | 27206358 | 27206776 |
| 13 | 27123163 | 27131674 NM_172155    | chr13 | 27131050 | 27131643 |
| 13 | 27059041 | 27067541 NM_011164    | chr13 | 27067118 | 27067462 |
| 7  | 27062269 | 27070779 NM_138676    | chr7  | 27063594 | 27064183 |
| 16 | 26902708 | 26911207 NM_001013761 | chr16 | 26904440 | 26905110 |
| 13 | 26775072 | 26783584 NM_008232    | chr13 | 26778268 | 26779193 |
| 8  | 26551554 | 26560053 AF418551     | chr8  | 26555993 | 26556785 |
| 8  | 26551554 | 26560053 AF418551     | chr8  | 26554868 | 26555578 |
| 9  | 26495008 | 26507261 NM_029792    | chr9  | 26506186 | 26506678 |
| 9  | 26495008 | 26507261 NM_029792    | chr9  | 26501951 | 26502613 |
| 16 | 26491062 | 26499621 NM_008364    | chr16 | 26495901 | 26496994 |
| 9  | 26477261 | 26485867 AB055781     | chr9  | 26481084 | 26481729 |
| 5  | 26433602 | 26442101 NM_207657    | chr5  | 26440188 | 26440890 |
| 5  | 26433602 | 26442101 NM_207657    | chr5  | 26434891 | 26435660 |
| 5  | 26367737 | 26376290 NM_029376    | chr5  | 26374323 | 26374918 |



|    |          |          |              |       |          |          |
|----|----------|----------|--------------|-------|----------|----------|
| 3  | 26322340 | 26330839 | BC005523     | chr3  | 26326720 | 26327432 |
| 2  | 26114067 | 26122566 | NM_177841    | chr2  | 26114491 | 26115374 |
| 8  | 26039379 | 26047878 | NM_145949    | chr8  | 26045693 | 26046791 |
| 4  | 25887830 | 25896633 | NM_010243    | chr4  | 25892122 | 25892751 |
| 2  | 25495275 | 25507266 | NM_178036    | chr2  | 25500116 | 25500698 |
| 17 | 25471980 | 25487927 | NM_018857    | chr17 | 25482380 | 25482977 |
| 2  | 25469127 | 25482463 | NM_001042630 | chr2  | 25472371 | 25473461 |
| 2  | 25272847 | 25281351 | NM_027085    | chr2  | 25276497 | 25277268 |
| 12 | 25225612 | 25234116 | BC085296     | chr12 | 25230920 | 25231536 |
| 9  | 25224993 | 25233542 | NM_026189    | chr9  | 25228113 | 25228776 |
| 19 | 25201187 | 25209686 | BC030316     | chr19 | 25209121 | 25209642 |
| 19 | 25201187 | 25209686 | BC030316     | chr19 | 25207052 | 25207907 |
| 18 | 25203239 | 25211738 | BC060607     | chr18 | 25205738 | 25206759 |
| 7  | 25119147 | 25127646 | NM_153576    | chr7  | 25127158 | 25127795 |
| 7  | 25095485 | 25110747 | NM_010719    | chr7  | 25103461 | 25104219 |
| 17 | 25086973 | 25100728 | NM_012034    | chr17 | 25095608 | 25096981 |
| 17 | 25019994 | 25039476 | NM_178372    | chr17 | 25021587 | 25022057 |
| 2  | 24896331 | 24904969 | NM_028093    | chr2  | 24903771 | 24904511 |
| 17 | 24766703 | 24775202 | BC009019     | chr17 | 24771761 | 24772574 |
| 5  | 24751428 | 24760017 | BC034185     | chr5  | 24757222 | 24757956 |
| 8  | 24671392 | 24679891 | NM_018743    | chr8  | 24678651 | 24679427 |
| 5  | 24607996 | 24616495 | NM_145401    | chr5  | 24613548 | 24614196 |
| 8  | 24598575 | 24607114 | U73972       | chr8  | 24603429 | 24604047 |
| 10 | 24553455 | 24561962 | NM_027347    | chr10 | 24555291 | 24556105 |
| 8  | 24517820 | 24526319 | NM_031158    | chr8  | 24523092 | 24523890 |
| 7  | 24462985 | 24475071 | NM_026862    | chr7  | 24471719 | 24472377 |
| 7  | 24430551 | 24440823 | NM_177593    | chr7  | 24438403 | 24439002 |
| 13 | 24418364 | 24426864 | NM_007717    | chr13 | 24424382 | 24425093 |
| 10 | 24399019 | 24407518 | NM_008813    | chr10 | 24399651 | 24400407 |
| 17 | 24370029 | 24391806 | NM_023055    | chr17 | 24375798 | 24376539 |
| 19 | 24345166 | 24353683 | NM_008044    | chr19 | 24347405 | 24348000 |
| 16 | 24302839 | 24311338 | NM_178665    | chr16 | 24308026 | 24308777 |
| 19 | 24238586 | 24247145 | AF113005     | chr19 | 24244110 | 24244762 |
| 8  | 24217292 | 24225812 | NM_008872    | chr8  | 24223891 | 24224578 |
| 8  | 24217292 | 24225812 | NM_008872    | chr8  | 24222536 | 24223140 |
| 9  | 24171356 | 24179855 | BC116782     | chr9  | 24177877 | 24178582 |
| 2  | 24152868 | 24161391 | NM_031167    | chr2  | 24158702 | 24159965 |
| 13 | 24099399 | 24107898 | BC012229     | chr13 | 24102722 | 24103334 |
| 7  | 24073023 | 24081656 | NM_008433    | chr7  | 24074838 | 24075706 |
| 11 | 24057310 | 24065809 | BC010585     | chr11 | 24057324 | 24058367 |
| 7  | 24051982 | 24060483 | BC119486     | chr7  | 24053300 | 24053908 |
| 8  | 23994570 | 24003069 | AF196476     | chr8  | 24001904 | 24002757 |
| 18 | 23940994 | 23949557 | NM_153058    | chr18 | 23941990 | 23942724 |
| 6  | 23917563 | 23926062 | NM_207022    | chr6  | 23920391 | 23921074 |
| 13 | 23919973 | 23928474 | NM_177016    | chr13 | 23920023 | 23920948 |
| 6  | 23917563 | 23926062 | NM_207022    | chr6  | 23918476 | 23919512 |
| 13 | 23871797 | 23880296 | NM_009198    | chr13 | 23873815 | 23874803 |

|    |          |          |              |       |          |          |
|----|----------|----------|--------------|-------|----------|----------|
| 9  | 23842425 | 23850924 | NM_175678    | chr9  | 23849662 | 23850411 |
| 10 | 23832733 | 23841302 | NM_016797    | chr10 | 23839791 | 23840889 |
| 16 | 23803684 | 23812193 | NM_009215    | chr16 | 23810201 | 23810794 |
| 10 | 23788829 | 23804950 | NM_001010831 | chr10 | 23793858 | 23794505 |
| 7  | 23757534 | 23766033 | NM_203489    | chr7  | 23763097 | 23764193 |
| 13 | 23740272 | 23773659 | NM_015786    | chr13 | 23742915 | 23743496 |
| 19 | 23717395 | 23725911 | NM_026188    | chr19 | 23717619 | 23718128 |
| 7  | 23705871 | 23714370 | NM_207619    | chr7  | 23711447 | 23712169 |
| 17 | 23700335 | 23708852 | NM_013921    | chr17 | 23707804 | 23708398 |
| 10 | 23683355 | 23691854 | NM_001010827 | chr10 | 23689735 | 23690434 |
| 10 | 23672563 | 23688897 | NM_001010829 | chr10 | 23681949 | 23682635 |
| 7  | 23655174 | 23663673 | NM_206869    | chr7  | 23661125 | 23661812 |
| 17 | 23639080 | 23647579 | NM_001077633 | chr17 | 23645711 | 23647338 |
| 10 | 23632974 | 23641473 | NM_001008429 | chr10 | 23639270 | 23640147 |
| 7  | 23631146 | 23639645 | NM_207545    | chr7  | 23637029 | 23637733 |
| 13 | 23626090 | 23636023 | NM_178194    | chr13 | 23631486 | 23632326 |
| 17 | 23602201 | 23611117 | NM_019910    | chr17 | 23604148 | 23605095 |
| 19 | 23512920 | 23521449 | NM_174857    | chr19 | 23516200 | 23516782 |
| 19 | 23512920 | 23521449 | NM_174857    | chr19 | 23513033 | 23513684 |
| 16 | 23433438 | 23441937 | NM_008555    | chr16 | 23438657 | 23439308 |
| 16 | 23433438 | 23441937 | NM_008555    | chr16 | 23436134 | 23436919 |
| 8  | 23395756 | 23404255 | NM_139222    | chr8  | 23401649 | 23402246 |
| 8  | 23397897 | 23414835 | NM_139223    | chr8  | 23401649 | 23402246 |
| 8  | 23348463 | 23356966 | NM_139219    | chr8  | 23354075 | 23354688 |
| 8  | 23348463 | 23356966 | NM_139219    | chr8  | 23348873 | 23350114 |
| 16 | 23338467 | 23346966 | NM_001004151 | chr16 | 23339757 | 23340968 |
| 13 | 23164108 | 23172607 | NM_134238    | chr13 | 23165171 | 23165810 |
| 16 | 23064549 | 23073056 | U49915       | chr16 | 23065764 | 23066462 |
| 13 | 23035803 | 23044302 | NM_134214    | chr13 | 23039100 | 23040153 |
| 16 | 22967670 | 22976253 | NM_023125    | chr16 | 22971907 | 22972648 |
| 16 | 22941844 | 22950402 | NM_201375    | chr16 | 22944685 | 22945363 |
| 11 | 22757181 | 22766336 | NM_016888    | chr11 | 22760096 | 22760721 |
| 11 | 22734698 | 22743197 | AF092050     | chr11 | 22739590 | 22740190 |
| 19 | 22502137 | 22517804 | NM_177341    | chr19 | 22507915 | 22508668 |
| 13 | 22442737 | 22451236 | NM_134211    | chr13 | 22446978 | 22447954 |
| 13 | 22396494 | 22404993 | NM_134212    | chr13 | 22402283 | 22402971 |
| 3  | 22299602 | 22308101 | AF268195     | chr3  | 22307248 | 22308075 |
| 13 | 22279782 | 22288281 | NM_134223    | chr13 | 22281768 | 22282490 |
| 13 | 22089343 | 22097842 | NM_145850    | chr13 | 22093204 | 22094204 |
| 9  | 22078593 | 22087092 | BC011413     | chr9  | 22081202 | 22081945 |
| 13 | 22037352 | 22053194 | NM_175665    | chr13 | 22049718 | 22051052 |
| 13 | 22040518 | 22056414 | NM_175656    | chr13 | 22049718 | 22051052 |
| 16 | 21908296 | 21916795 | NM_153404    | chr16 | 21915992 | 21916649 |
| 4  | 21812536 | 21821108 | NM_016746    | chr4  | 21818195 | 21819017 |
| 16 | 21606098 | 21614597 | NM_001001881 | chr16 | 21609031 | 21609695 |
| 9  | 21579466 | 21587965 | BC057368     | chr9  | 21585414 | 21586207 |
| 17 | 21355904 | 21364403 | BC064464     | chr17 | 21356652 | 21357662 |

|   |    |          |          |              |       |          |          |
|---|----|----------|----------|--------------|-------|----------|----------|
|   | 13 | 21348395 | 21356894 | NM_146533    | chr13 | 21351478 | 21352241 |
|   | 1  | 21329065 | 21337564 | NM_183322    | chr1  | 21329346 | 21329733 |
|   | 13 | 21297652 | 21310183 | NM_010343    | chr13 | 21302353 | 21302970 |
|   | 1  | 21228900 | 21237399 | BC009805     | chr1  | 21232836 | 21233491 |
|   | 1  | 21228900 | 21237399 | BC009805     | chr1  | 21230656 | 21231484 |
|   | 13 | 21148047 | 21156546 | NM_146534    | chr13 | 21149598 | 21150302 |
|   | 13 | 21134163 | 21142662 | NM_010984    | chr13 | 21140465 | 21141191 |
|   | 16 | 21112777 | 21121277 | NM_010143    | chr16 | 21117296 | 21117907 |
|   | 18 | 21081635 | 21090134 | NM_026301    | chr18 | 21085453 | 21086361 |
|   | 13 | 21078265 | 21086764 | NM_146535    | chr13 | 21084715 | 21085353 |
|   | 16 | 21065379 | 21073927 | NM_025634    | chr16 | 21065664 | 21066529 |
|   | 15 | 21050177 | 21058676 | NM_001008420 | chr15 | 21055101 | 21055790 |
|   | 10 | 20972635 | 20987969 | NM_019702    | chr10 | 20978992 | 20979585 |
| X |    | 20865859 | 20874416 | NM_020049    | chrX  | 20871912 | 20872501 |
|   | 4  | 20867004 | 20875503 | NM_172987    | chr4  | 20869486 | 20870562 |
|   | 4  | 20867004 | 20875503 | NM_172987    | chr4  | 20867434 | 20868272 |
|   | 11 | 20728561 | 20737070 | NM_173752    | chr11 | 20732669 | 20733301 |
|   | 1  | 20710056 | 20718568 | NM_010552    | chr1  | 20715422 | 20716072 |
|   | 17 | 20707671 | 20718871 | NM_145483    | chr17 | 20714649 | 20715177 |
|   | 1  | 20710056 | 20718568 | NM_010552    | chr1  | 20714458 | 20715339 |
|   | 17 | 20696884 | 20705383 | NM_134202    | chr17 | 20698553 | 20699407 |
|   | 17 | 20616534 | 20625033 | NM_134193    | chr17 | 20618845 | 20619436 |
|   | 16 | 20580292 | 20588862 | NM_145941    | chr16 | 20587246 | 20588304 |
|   | 9  | 20476117 | 20484631 | NM_173777    | chr9  | 20480598 | 20481187 |
|   | 3  | 20464303 | 20472802 | NM_029706    | chr3  | 20465595 | 20466217 |
|   | 10 | 20411766 | 20420494 | NM_013875    | chr10 | 20414430 | 20415292 |
|   | 16 | 20213406 | 20221905 | NM_001005767 | chr16 | 20217106 | 20217600 |
|   | 18 | 20142608 | 20151107 | NM_007882    | chr18 | 20147287 | 20148232 |
|   | 10 | 19891886 | 19900385 | BC046339     | chr10 | 19899753 | 19900363 |
|   | 3  | 19884144 | 19893480 | NM_205769    | chr3  | 19890926 | 19891841 |
|   | 4  | 19847170 | 19855713 | NM_175406    | chr4  | 19854475 | 19855131 |
| X |    | 19769154 | 19780513 | NM_019435    | chrX  | 19775958 | 19776939 |
| X |    | 19770955 | 19779454 | NM_145627    | chrX  | 19775958 | 19776939 |
|   | 13 | 19757653 | 19766152 | BC125587     | chr13 | 19758249 | 19759161 |
|   | 13 | 19624609 | 19633268 | NM_134065    | chr13 | 19632381 | 19633156 |
|   | 13 | 19624648 | 19633180 | NM_016687    | chr13 | 19632381 | 19633156 |
|   | 16 | 19517730 | 19526229 | NM_146957    | chr16 | 19522719 | 19523934 |
|   | 3  | 19454609 | 19463108 | NM_008802    | chr3  | 19460116 | 19460683 |
|   | 9  | 19457231 | 19465730 | NM_001012265 | chr9  | 19460105 | 19461005 |
|   | 14 | 19442511 | 19451055 | NM_021508    | chr14 | 19444086 | 19444954 |
|   | 10 | 19396003 | 19404518 | NM_172786    | chr10 | 19401931 | 19402546 |
|   | 2  | 19357392 | 19372723 | NM_018809    | chr2  | 19360319 | 19360919 |
|   | 7  | 19295111 | 19303610 | NM_207547    | chr7  | 19296780 | 19297725 |
|   | 8  | 19219455 | 19227954 | NM_054074    | chr8  | 19220179 | 19220581 |
|   | 13 | 19186420 | 19194919 | M54990       | chr13 | 19189442 | 19190209 |
|   | 8  | 19188334 | 19201182 | NM_019728    | chr8  | 19188398 | 19189016 |
|   | 8  | 18988533 | 18997032 | NM_181683    | chr8  | 18989497 | 18990347 |

|   |    |          |                       |       |          |          |
|---|----|----------|-----------------------|-------|----------|----------|
|   | 16 | 18974324 | 18982823 BC002129     | chr16 | 18975305 | 18976078 |
|   | 8  | 18840282 | 18849030 NM_026792    | chr8  | 18846046 | 18846739 |
|   | 10 | 18702284 | 18710826 NM_009397    | chr10 | 18705797 | 18706560 |
|   | 2  | 18584191 | 18597657 NM_007552    | chr2  | 18590506 | 18591456 |
|   | 10 | 18472650 | 18482209 NM_177706    | chr10 | 18481041 | 18481641 |
|   | 10 | 18472650 | 18482209 NM_177706    | chr10 | 18473909 | 18474669 |
|   | 14 | 18390784 | 18399283 NM_001024706 | chr14 | 18391205 | 18391878 |
|   | 6  | 18056556 | 18065057 NM_023729    | chr6  | 18058002 | 18058586 |
|   | 7  | 17954509 | 17963032 NM_011964    | chr7  | 17958696 | 17959281 |
|   | 2  | 17646298 | 17654822 NM_028757    | chr2  | 17649957 | 17650586 |
|   | 6  | 17637997 | 17646531 BC024652     | chr6  | 17638904 | 17639461 |
| X |    | 17615734 | 17624233 NM_175228    | chrX  | 17617997 | 17618957 |
|   | 10 | 17479696 | 17488195 NM_138628    | chr10 | 17481551 | 17482372 |
|   | 13 | 17474555 | 17483068 NM_025479    | chr13 | 17475006 | 17475608 |
|   | 6  | 17435241 | 17443740 NM_008591    | chr6  | 17437872 | 17438510 |
|   | 12 | 17347684 | 17356230 NM_133699    | chr12 | 17352519 | 17353136 |
| X |    | 17313626 | 17322125 NM_009483    | chrX  | 17319176 | 17320068 |
| X |    | 17296816 | 17305328 NM_028568    | chrX  | 17303967 | 17304597 |
|   | 6  | 17250370 | 17260222 NM_007616    | chr6  | 17259545 | 17260137 |
|   | 6  | 16845827 | 16854441 NM_031198    | chr6  | 16845946 | 16846423 |
|   | 12 | 16780222 | 16788721 NM_015764    | chr12 | 16782046 | 16782637 |
|   | 11 | 16646206 | 16654935 NM_207655    | chr11 | 16649357 | 16650084 |
|   | 12 | 16612730 | 16621250 NM_172950    | chr12 | 16617718 | 16618488 |
|   | 16 | 16471213 | 16479759 NM_139232    | chr16 | 16471457 | 16472443 |
|   | 18 | 16415508 | 16424027 BC021916     | chr18 | 16419718 | 16420333 |
|   | 19 | 16332155 | 16340654 NM_018858    | chr19 | 16333185 | 16333840 |
|   | 19 | 16193850 | 16202809 NM_008139    | chr19 | 16195857 | 16196384 |
|   | 19 | 15974232 | 15982731 BC005657     | chr19 | 15981258 | 15982324 |
|   | 19 | 15974232 | 15982731 BC005657     | chr19 | 15979787 | 15980374 |
|   | 19 | 15974232 | 15982731 BC005657     | chr19 | 15977671 | 15978557 |
|   | 1  | 15875437 | 15883936 NM_001033288 | chr1  | 15882773 | 15883610 |
|   | 1  | 15875437 | 15883936 NM_001033288 | chr1  | 15879006 | 15879735 |
|   | 7  | 15831728 | 15840227 BC125404     | chr7  | 15832637 | 15833802 |
|   | 9  | 15622354 | 15630853 NM_145712    | chr9  | 15625312 | 15626203 |
|   | 18 | 15540522 | 15560000 NM_009700    | chr18 | 15559010 | 15559596 |
|   | 18 | 15540522 | 15560000 NM_009700    | chr18 | 15555943 | 15556593 |
|   | 18 | 15540522 | 15560000 NM_009700    | chr18 | 15549042 | 15550056 |
|   | 14 | 15365978 | 15374739 NM_011243    | chr14 | 15371885 | 15372706 |
|   | 9  | 15360050 | 15368549 NM_181816    | chr9  | 15363869 | 15364805 |
|   | 17 | 15095209 | 15109986 NM_024203    | chr17 | 15099590 | 15100186 |
|   | 4  | 15073762 | 15082278 NM_178617    | chr4  | 15076460 | 15077278 |
|   | 9  | 15027761 | 15036260 NM_144933    | chr9  | 15030415 | 15031137 |
|   | 8  | 14882513 | 14891557 NM_012000    | chr8  | 14886400 | 14887070 |
|   | 9  | 14792970 | 14801871 NM_019482    | chr9  | 14799724 | 14800352 |
|   | 9  | 14651778 | 14667311 NM_022888    | chr9  | 14658348 | 14658949 |
|   | 19 | 14514064 | 14522563 AF141905     | chr19 | 14514376 | 14514996 |
|   | 9  | 14488627 | 14497126 NM_177905    | chr9  | 14496464 | 14497028 |

|   |    |          |                       |       |          |          |
|---|----|----------|-----------------------|-------|----------|----------|
|   | 17 | 14428150 | 14436687 NM_011581    | chr17 | 14428789 | 14429717 |
|   | 2  | 14141168 | 14149667 NM_008625    | chr2  | 14145356 | 14146039 |
|   | 10 | 14126197 | 14134696 BC080779     | chr10 | 14133077 | 14133674 |
|   | 9  | 14020698 | 14029197 NM_030261    | chr9  | 14021857 | 14022724 |
|   | 17 | 13937857 | 13946691 NM_172826    | chr17 | 13945581 | 13946340 |
|   | 16 | 13894184 | 13902735 NM_144518    | chr16 | 13901733 | 13902914 |
|   | 16 | 13894996 | 13904199 NM_028968    | chr16 | 13901733 | 13902914 |
|   | 19 | 13892914 | 13901413 NM_001011831 | chr19 | 13896273 | 13896867 |
|   | 19 | 13880108 | 13888607 NM_146796    | chr19 | 13882585 | 13883631 |
|   | 19 | 13841633 | 13850132 NM_146989    | chr19 | 13845846 | 13846697 |
|   | 8  | 13491968 | 13500505 NM_019521    | chr8  | 13493139 | 13493742 |
|   | 2  | 13485805 | 13494746 NM_011701    | chr2  | 13486595 | 13487279 |
|   | 2  | 13460001 | 13468517 NM_010067    | chr2  | 13467063 | 13467632 |
|   | 12 | 13382553 | 13391052 BC057020     | chr12 | 13383928 | 13384529 |
| X |    | 13362071 | 13370606 BC100482     | chrX  | 13365902 | 13366521 |
|   | 13 | 13223817 | 13232316 NM_010917    | chr13 | 13228182 | 13228751 |
|   | 9  | 13174534 | 13183138 BC127147     | chr9  | 13174770 | 13175443 |
|   | 17 | 13141000 | 13149499 BC061173     | chr17 | 13147939 | 13148740 |
|   | 17 | 13141000 | 13149499 BC061173     | chr17 | 13145022 | 13146119 |
|   | 17 | 13141000 | 13149499 BC061173     | chr17 | 13140997 | 13141635 |
|   | 8  | 13099720 | 13108234 NM_146207    | chr8  | 13106527 | 13107204 |
|   | 16 | 13017314 | 13026022 NM_015769    | chr16 | 13023370 | 13024212 |
|   | 8  | 13015918 | 13028522 NM_010172    | chr8  | 13016795 | 13017804 |
| X |    | 13001016 | 13009515 NM_009806    | chrX  | 13004776 | 13005405 |
|   | 14 | 12966885 | 12975384 NM_146392    | chr14 | 12968011 | 12968657 |
|   | 19 | 12944902 | 12953401 NM_146699    | chr19 | 12947662 | 12948317 |
|   | 8  | 12909888 | 12918434 NM_178076    | chr8  | 12910537 | 12911242 |
|   | 10 | 12800894 | 12817556 AF147785     | chr10 | 12802066 | 12802893 |
|   | 17 | 12708576 | 12717075 NM_008552    | chr17 | 12710874 | 12711661 |
|   | 13 | 12615007 | 12623536 NM_026184    | chr13 | 12617325 | 12617914 |
|   | 19 | 12483356 | 12497481 NM_019540    | chr19 | 12493113 | 12493659 |
|   | 14 | 12458143 | 12466642 NM_177624    | chr14 | 12460509 | 12461726 |
|   | 13 | 12392558 | 12401065 NM_033268    | chr13 | 12400193 | 12400810 |
|   | 8  | 12390321 | 12398820 NM_009233    | chr8  | 12396654 | 12397279 |
|   | 8  | 12379743 | 12388242 NM_001013812 | chr8  | 12381982 | 12382991 |
|   | 19 | 12344089 | 12352594 NM_207626    | chr19 | 12349621 | 12350259 |
|   | 12 | 12296328 | 12304827 NM_029758    | chr12 | 12296786 | 12297389 |
|   | 12 | 12282163 | 12290662 BC049664     | chr12 | 12286913 | 12287757 |
|   | 12 | 12282163 | 12290662 BC049664     | chr12 | 12285445 | 12286347 |
|   | 19 | 12270613 | 12279112 NM_146414    | chr19 | 12270585 | 12271064 |
|   | 17 | 12215966 | 12224524 NM_008877    | chr17 | 12219849 | 12220441 |
|   | 19 | 12174090 | 12182589 NM_146678    | chr19 | 12177885 | 12178522 |
|   | 14 | 12075406 | 12083905 NM_177813    | chr14 | 12081401 | 12082137 |
|   | 7  | 11982895 | 11991394 NM_145847    | chr7  | 11987133 | 11987863 |
|   | 19 | 11973481 | 11982002 NM_172635    | chr19 | 11979324 | 11980385 |
|   | 19 | 11893570 | 11902069 NM_146936    | chr19 | 11894533 | 11895277 |
|   | 11 | 11778154 | 11786653 AF071068     | chr11 | 11784266 | 11784889 |

|    |          |                       |       |          |          |
|----|----------|-----------------------|-------|----------|----------|
| 11 | 11778154 | 11786653 AF071068     | chr11 | 11779631 | 11780752 |
| 19 | 11755576 | 11764101 NM_133353    | chr19 | 11764014 | 11764940 |
| 19 | 11756086 | 11766599 NM_001033283 | chr19 | 11764014 | 11764940 |
| 4  | 11688879 | 11697378 AF177669     | chr4  | 11694323 | 11695633 |
| 11 | 11579928 | 11592868 NM_001025597 | chr11 | 11581463 | 11582394 |
| 8  | 11476097 | 11484596 NM_011227    | chr8  | 11481706 | 11482447 |
| 2  | 11417379 | 11425920 NM_133232    | chr2  | 11423176 | 11423800 |
| 19 | 11330678 | 11339194 NM_007641    | chr19 | 11332424 | 11333082 |
| 19 | 11229852 | 11238365 NM_027074    | chr19 | 11230309 | 11230952 |
| 12 | 11174217 | 11182716 NM_173417    | chr12 | 11178123 | 11179321 |
| 2  | 11162398 | 11170897 AB062122     | chr2  | 11164228 | 11164846 |
| 2  | 11162398 | 11170897 AB062122     | chr2  | 11162459 | 11163188 |
| 14 | 11136002 | 11145111 NM_080433    | chr14 | 11140256 | 11141151 |
| 14 | 11071476 | 11081149 NM_146051    | chr14 | 11078076 | 11078987 |
| 18 | 11046506 | 11056992 NM_010258    | chr18 | 11050782 | 11051782 |
| 15 | 10979616 | 10988693 NM_178717    | chr15 | 10986417 | 10987121 |
| 19 | 10934277 | 10942824 NM_133804    | chr19 | 10934277 | 10934856 |
| 12 | 10923772 | 10932304 BC108372     | chr12 | 10929761 | 10930391 |
| 10 | 10768647 | 10778546 NM_016976    | chr10 | 10777852 | 10778445 |
| 16 | 10742666 | 10751165 NM_001033278 | chr16 | 10743664 | 10744266 |
| 16 | 10696004 | 10716404 NM_009896    | chr16 | 10711478 | 10712061 |
| 16 | 10696004 | 10716404 NM_009896    | chr16 | 10700126 | 10700888 |
| X  | 10450183 | 10484020 BC049545     | chrX  | 10480025 | 10480586 |
| X  | 10450183 | 10484020 BC049545     | chrX  | 10470559 | 10471085 |
| X  | 10450183 | 10484020 BC049545     | chrX  | 10464190 | 10464751 |
| X  | 10450183 | 10484020 BC049545     | chrX  | 10461021 | 10461582 |
| X  | 10450183 | 10484020 BC049545     | chrX  | 10459949 | 10460347 |
| 13 | 10357550 | 10366049 NM_033269    | chr13 | 10362843 | 10363518 |
| 3  | 10343505 | 10352014 NM_025519    | chr3  | 10350290 | 10350925 |
| 3  | 10343505 | 10352014 NM_025519    | chr3  | 10348496 | 10349140 |
| 3  | 10281216 | 10289715 NM_029310    | chr3  | 10287351 | 10287765 |
| 3  | 10281216 | 10289715 NM_029310    | chr3  | 10285928 | 10286834 |
| 15 | 10270780 | 10279279 BC096586     | chr15 | 10272198 | 10272792 |
| 3  | 10177255 | 10185754 NM_011598    | chr3  | 10185092 | 10185714 |
| 3  | 10177255 | 10185754 NM_011598    | chr3  | 10178063 | 10178782 |
| 19 | 10166037 | 10174548 NM_019699    | chr19 | 10166033 | 10166631 |
| 8  | 10147883 | 10156382 BC072580     | chr8  | 10152629 | 10153476 |
| 8  | 10147883 | 10156382 BC072580     | chr8  | 10148761 | 10149453 |
| 16 | 10077806 | 10086377 NM_026594    | chr16 | 10085064 | 10085728 |
| 16 | 10077806 | 10086377 NM_026594    | chr16 | 10078048 | 10078602 |
| 14 | 9952763  | 9961286 AF047699      | chr14 | 9954120  | 9954827  |
| 1  | 9847624  | 9856123 BC018363      | chr1  | 9854847  | 9855509  |
| 12 | 9594505  | 9607599 NM_011859     | chr12 | 9599241  | 9600086  |
| 3  | 9590659  | 9599158 NM_133218     | chr3  | 9595561  | 9596249  |
| 3  | 9590659  | 9599158 NM_133218     | chr3  | 9593574  | 9594461  |
| 1  | 9281288  | 9290452 NM_027671     | chr1  | 9286415  | 9287502  |
| 14 | 9244703  | 9253202 BC012662      | chr14 | 9246149  | 9246818  |

|   |    |         |                      |       |         |         |
|---|----|---------|----------------------|-------|---------|---------|
|   | 3  | 8944620 | 8953127 NM_001025261 | chr3  | 8946091 | 8946983 |
|   | 15 | 8909334 | 8917833 NM_198024    | chr15 | 8915746 | 8916642 |
|   | 6  | 8893815 | 8902314 NM_008751    | chr6  | 8896791 | 8897401 |
|   | 5  | 8798192 | 8806691 NM_011075    | chr5  | 8800072 | 8800545 |
|   | 19 | 8725066 | 8733895 NM_007698    | chr19 | 8733099 | 8733756 |
|   | 17 | 8682159 | 8690658 AF110507     | chr17 | 8687117 | 8687970 |
|   | 15 | 8653524 | 8663945 NM_148938    | chr15 | 8658795 | 8659737 |
| X |    | 8623727 | 8632250 NM_007807    | chrX  | 8626557 | 8627162 |
|   | 17 | 8228803 | 8237302 NM_013682    | chr17 | 8230474 | 8230968 |
|   | 4  | 8163663 | 8172188 NM_007592    | chr4  | 8163784 | 8164451 |
| X |    | 8141132 | 8149631 BC104363     | chrX  | 8141358 | 8142542 |
|   | 6  | 7640681 | 7649199 NM_012055    | chr6  | 7645261 | 7645931 |
|   | 9  | 7565458 | 7573957 NM_001030289 | chr9  | 7568947 | 7569586 |
|   | 3  | 7343677 | 7352242 NM_008862    | chr3  | 7351568 | 7352208 |
|   | 9  | 7341374 | 7349920 NM_008605    | chr9  | 7341423 | 7342149 |
| X |    | 7330641 | 7339140 NM_172478    | chrX  | 7336364 | 7336957 |
|   | 9  | 7266514 | 7275013 NM_008607    | chr9  | 7273596 | 7274197 |
|   | 19 | 7104480 | 7112987 NM_016737    | chr19 | 7106800 | 7107811 |
|   | 17 | 7013773 | 7022362 NM_011299    | chr17 | 7014562 | 7015521 |
|   | 18 | 7002255 | 7010754 NM_177595    | chr18 | 7005256 | 7005958 |
|   | 19 | 6986311 | 6998424 NM_007953    | chr19 | 6994489 | 6995335 |
|   | 4  | 6915158 | 6923870 NM_145711    | chr4  | 6917376 | 6917982 |
|   | 6  | 6829409 | 6838082 NM_010056    | chr6  | 6836288 | 6837048 |
|   | 15 | 6818999 | 6828184 NM_011019    | chr15 | 6825791 | 6826752 |
|   | 15 | 6818999 | 6828184 NM_011019    | chr15 | 6819323 | 6819830 |
|   | 10 | 6803763 | 6812285 NM_027391    | chr10 | 6807725 | 6808818 |
|   | 14 | 6783505 | 6792061 NM_007870    | chr14 | 6783587 | 6784454 |
|   | 15 | 6521086 | 6529593 NM_011815    | chr15 | 6528647 | 6529284 |
|   | 19 | 6511177 | 6519676 BC060272     | chr19 | 6515399 | 6515960 |
|   | 15 | 6327980 | 6336537 NM_023118    | chr15 | 6334388 | 6335183 |
|   | 15 | 6270771 | 6279270 NM_198643    | chr15 | 6274364 | 6274857 |
|   | 15 | 6241064 | 6249563 NM_001008702 | chr15 | 6244551 | 6245169 |
|   | 19 | 6233132 | 6241840 NM_198168    | chr19 | 6241277 | 6242079 |
|   | 19 | 6235668 | 6244226 NM_194348    | chr19 | 6241277 | 6242079 |
|   | 4  | 6200279 | 6208778 NM_007824    | chr4  | 6204637 | 6205384 |
|   | 2  | 6127748 | 6136266 NM_024208    | chr2  | 6132239 | 6132824 |
|   | 2  | 6044907 | 6056844 NM_144883    | chr2  | 6056540 | 6057116 |
|   | 10 | 5731996 | 5740495 NM_007956    | chr10 | 5737879 | 5738318 |
|   | 10 | 5731996 | 5740495 NM_007956    | chr10 | 5735453 | 5736143 |
|   | 10 | 5633866 | 5642365 M38651       | chr10 | 5640071 | 5640683 |
|   | 19 | 5607186 | 5616035 NM_178637    | chr19 | 5614877 | 5615552 |
| X |    | 5569621 | 5578120 NM_001040459 | chrX  | 5576932 | 5577712 |
|   | 11 | 5463688 | 5472411 AF294328     | chr11 | 5463233 | 5463865 |
|   | 11 | 5414644 | 5423469 NM_013842    | chr11 | 5421484 | 5422352 |
|   | 5  | 5383704 | 5392209 NM_011074    | chr5  | 5388829 | 5389456 |
| X |    | 5345925 | 5354467 NM_001031664 | chrX  | 5347946 | 5348469 |
|   | 9  | 5339489 | 5348980 NM_009808    | chr9  | 5346229 | 5347111 |

|          |         |                      |             |         |         |
|----------|---------|----------------------|-------------|---------|---------|
| 2        | 5212332 | 5220831 BC025011     | chr2        | 5212440 | 5213092 |
| 15       | 5188398 | 5197387 NM_008965    | chr15       | 5195194 | 5195863 |
| 11       | 5159062 | 5167613 NM_032396    | chr11       | 5167201 | 5167572 |
| 6        | 5057428 | 5065927 BC048729     | chr6        | 5064099 | 5065301 |
| 19       | 4987367 | 4995971 NM_153553    | chr19       | 4993238 | 4994079 |
| 19       | 4875376 | 4883884 NM_013456    | chr19       | 4882115 | 4882721 |
| 16       | 4848339 | 4856849 NM_025839    | chr16       | 4848728 | 4849725 |
| 12       | 4780043 | 4788971 NM_028376    | chr12       | 4787719 | 4788660 |
| 12       | 4783568 | 4792253 NM_175431    | chr12       | 4787719 | 4788660 |
| 16       | 4549188 | 4557721 NM_139307    | chr16       | 4552002 | 4552607 |
| 13       | 4520076 | 4528579 NM_054080    | chr13       | 4526140 | 4526700 |
| 7        | 4353490 | 4362181 NM_183405    | chr7        | 4361725 | 4362897 |
| 16       | 4332316 | 4341034 NM_009624    | chr16       | 4332519 | 4333100 |
| 14       | 4277097 | 4285596 NM_025940    | chr14       | 4284757 | 4285903 |
| 14       | 4277097 | 4285596 NM_025940    | chr14       | 4281430 | 4282388 |
| 14       | 4277097 | 4285596 NM_025940    | chr14       | 4276615 | 4277908 |
| 12       | 4127363 | 4136575 NM_138305    | chr12       | 4135804 | 4136502 |
| 2        | 4064143 | 4072643 NM_172475    | chr2        | 4068428 | 4069323 |
| 4        | 4002162 | 4010661 BC125450     | chr4        | 4007319 | 4007801 |
| 11       | 3958844 | 3967343 NM_001029937 | chr11       | 3961567 | 3962158 |
| 11       | 3958844 | 3967343 NM_001029937 | chr11       | 3959055 | 3959661 |
| 4        | 3944230 | 3952810 NM_181989    | chr4        | 3950354 | 3951467 |
| 12       | 3948967 | 3957466 NM_008895    | chr12       | 3948971 | 3949823 |
| 16       | 3946329 | 3955084 NM_010061    | chr16       | 3947860 | 3948635 |
| 4        | 3944230 | 3952810 NM_181989    | chr4        | 3947631 | 3948333 |
| 4        | 3898226 | 3906728 BC080838     | chr4        | 3903379 | 3904036 |
| 4        | 3830356 | 3838855 AF057366     | chr4        | 3831206 | 3832009 |
| 13       | 3831002 | 3839519 NM_020036    | chr13       | 3831019 | 3831683 |
| 11       | 3789250 | 3797783 NM_173745    | chr11       | 3797564 | 3798238 |
| 11       | 3792602 | 3801101 NM_026150    | chr11       | 3797564 | 3798238 |
| 8        | 3746431 | 3754984 NM_133238    | chr8        | 3752894 | 3753959 |
| 8        | 3659756 | 3668261 NM_026985    | chr8        | 3665858 | 3666338 |
| 1        | 3659080 | 3667579 NM_001011874 | chr1        | 3665408 | 3666106 |
| 5        | 3657010 | 3665651 NM_029141    | chr5        | 3660366 | 3661358 |
| 12       | 3420884 | 3429400 NM_172421    | chr12       | 3427144 | 3427854 |
| 5        | 3344318 | 3352828 NM_009873    | chr5        | 3351220 | 3352347 |
| 2        | 3281342 | 3289863 NM_145921    | chr2        | 3288001 | 3289027 |
| 8        | 3276677 | 3285176 NM_010568    | chr8        | 3277288 | 3278213 |
| 2        | 3247364 | 3255874 NM_001013376 | chr2        | 3249520 | 3250303 |
| 7_random | 98374   | 106873 NM_133190     | chr7_random | 99070   | 99935   |



| gene overlap percent | region overlap percent | length(bps) | probes in region | p-value(region) |
|----------------------|------------------------|-------------|------------------|-----------------|
| 0.0433347            | 1                      | 722         | 20               | 0.038947        |
| 0.0696284            | 1                      | 594         | 14               | 0.035928        |
| 0.065731             | 1                      | 562         | 16               | 0.0158984       |
| 0.0694892            | 1                      | 604         | 17               | 0.0246818       |
| 0.0673921            | 1                      | 576         | 15               | 0.0338359       |
| 0.0453216            | 1                      | 651         | 14               | 0.0210272       |
| 0.0547898            | 1                      | 787         | 22               | 0.0359987       |
| 0.120471             | 1                      | 1024        | 23               | 0.0352042       |
| 0.0707059            | 1                      | 601         | 11               | 0.046574        |
| 0.0831765            | 1                      | 707         | 17               | 0.0360958       |
| 0.0458853            | 1                      | 707         | 19               | 0.047395        |
| 0.0633017            | 1                      | 607         | 17               | 0.0434491       |
| 0.0703932            | 1                      | 675         | 18               | 0.0310994       |
| 0.0562353            | 1                      | 478         | 13               | 0.0247877       |
| 0.0717979            | 1                      | 611         | 15               | 0.0409244       |
| 0.106981             | 1                      | 921         | 23               | 0.024311        |
| 0.0768235            | 1                      | 653         | 15               | 0.0463534       |
| 0.126941             | 1                      | 1079        | 26               | 0.0332798       |
| 0.0812941            | 1                      | 691         | 20               | 0.0358398       |
| 0.0805882            | 1                      | 685         | 14               | 0.0303579       |
| 0.0479399            | 1                      | 619         | 16               | 0.0462121       |
| 0.077826             | 1                      | 663         | 19               | 0.021751        |
| 0.0456502            | 1                      | 721         | 20               | 0.0433608       |
| 0.0837027            | 1                      | 1322        | 33               | 0.046627        |
| 0.0728235            | 1                      | 619         | 17               | 0.0297576       |
| 0.0747059            | 1                      | 635         | 18               | 0.0489222       |
| 0.102353             | 1                      | 870         | 16               | 0.0340831       |
| 0.0455672            | 1                      | 772         | 21               | 0.0493547       |
| 0.0363003            | 1                      | 615         | 17               | 0.0429812       |
| 0.0585527            | 1                      | 992         | 24               | 0.0348776       |
| 0.0357691            | 1                      | 606         | 17               | 0.0376847       |
| 0.056841             | 1                      | 963         | 20               | 0.0483219       |
| 0.0744706            | 1                      | 633         | 18               | 0.0439787       |
| 0.0978824            | 1                      | 832         | 20               | 0.0335358       |
| 0.168588             | 1                      | 1433        | 40               | 0.0241521       |
| 0.0890136            | 1                      | 777         | 18               | 0.0349747       |
| 0.0712941            | 1                      | 606         | 12               | 0.0327325       |
| 0.105647             | 1                      | 898         | 20               | 0.0489751       |
| 0.0809412            | 1                      | 688         | 14               | 0.0441994       |
| 0.0703963            | 1                      | 604         | 17               | 0.0345686       |
| 0.0854187            | 1                      | 1065        | 24               | 0.0208595       |
| 0.0802855            | 1                      | 1001        | 25               | 0.0181671       |
| 0.0379903            | 1                      | 617         | 18               | 0.0431048       |
| 0.0724348            | 1                      | 617         | 18               | 0.0431048       |

|            |           |      |    |            |
|------------|-----------|------|----|------------|
| 0.0694118  | 1         | 590  | 14 | 0.0461944  |
| 0.0967704  | 1         | 827  | 21 | 0.0374464  |
| 0.146869   | 1         | 1250 | 35 | 0.0236666  |
| 0.0661264  | 1         | 563  | 10 | 0.0389294  |
| 0.0743529  | 1         | 632  | 14 | 0.0382055  |
| 0.0756857  | 1         | 654  | 15 | 0.0498844  |
| 0.0507996  | 1         | 432  | 10 | 0.0449498  |
| 0.0866917  | 1         | 740  | 21 | 0.0491693  |
| 0.0719054  | 1         | 614  | 17 | 0.0495313  |
| 0.07739    | 1         | 663  | 16 | 0.0360958  |
| 0.0723529  | 1         | 615  | 11 | 0.0389029  |
| 0.131424   | 1         | 1161 | 26 | 0.011723   |
| 0.11427    | 1         | 1029 | 25 | 0.0350453  |
| 0.126588   | 1         | 1076 | 24 | 0.0225985  |
| 0.0705882  | 1         | 600  | 17 | 0.0386381  |
| 0.0728555  | 1         | 620  | 18 | 0.0444289  |
| 0.0846703  | 1         | 723  | 20 | 0.0329796  |
| 0.0848691  | 1         | 723  | 20 | 0.0329796  |
| 0.0718387  | 1         | 613  | 16 | 0.0304638  |
| 0.0699719  | 1         | 597  | 12 | 0.0447379  |
| 0.0700951  | 1         | 597  | 12 | 0.0447379  |
| 0.0865036  | 1         | 739  | 17 | 0.0447114  |
| 0.00332883 | 0.0474968 | 779  | 19 | 0.0476333  |
| 0.0737742  | 1         | 820  | 22 | 0.0321675  |
| 0.0708052  | 1         | 787  | 22 | 0.00893346 |
| 0.0739541  | 1         | 822  | 23 | 0.0350012  |
| 0.0619469  | 1         | 609  | 17 | 0.0479864  |
| 0.0312771  | 1         | 614  | 13 | 0.0481012  |
| 0.0456166  | 1         | 614  | 13 | 0.0481012  |
| 0.048      | 0.419753  | 972  | 25 | 0.021751   |
| 0.0397234  | 1         | 672  | 19 | 0.0487721  |
| 0.0787059  | 1         | 669  | 19 | 0.032141   |
| 0.0692941  | 1         | 589  | 16 | 0.0442612  |
| 0.104118   | 1         | 885  | 25 | 0.0338006  |
| 0.0957647  | 1         | 814  | 23 | 0.0357074  |
| 0.080814   | 1         | 687  | 16 | 0.0239138  |
| 0.13268    | 1         | 1138 | 27 | 0.0246729  |
| 0.0725882  | 1         | 617  | 11 | 0.0491252  |
| 0.0778366  | 1         | 662  | 19 | 0.0326265  |
| 0.0902353  | 1         | 767  | 22 | 0.0473155  |
| 0.0765882  | 1         | 651  | 16 | 0.0336947  |
| 0.0430811  | 1         | 599  | 17 | 0.0289631  |
| 0.0504171  | 1         | 701  | 15 | 0.0183789  |
| 0.0846924  | 1         | 727  | 19 | 0.0172578  |
| 0.0721769  | 1         | 620  | 13 | 0.0437934  |
| 0.049462   | 1         | 616  | 10 | 0.035522   |
| 0.0751262  | 1         | 640  | 17 | 0.0317173  |

|           |          |      |    |           |
|-----------|----------|------|----|-----------|
| 0.071722  | 1        | 611  | 15 | 0.0318144 |
| 0.0718824 | 1        | 611  | 17 | 0.0453117 |
| 0.0752941 | 1        | 640  | 18 | 0.0438463 |
| 0.0379933 | 1        | 646  | 14 | 0.0444907 |
| 0.125059  | 1        | 1063 | 26 | 0.013153  |
| 0.0827085 | 1        | 706  | 20 | 0.0287689 |
| 0.131059  | 1        | 1114 | 30 | 0.0150774 |
| 0.0684724 | 1        | 589  | 14 | 0.0469448 |
| 0.0793929 | 1        | 680  | 13 | 0.0263678 |
| 0.118497  | 1        | 1009 | 27 | 0.0237107 |
| 0.0879353 | 1        | 750  | 21 | 0.0479335 |
| 0.0697974 | 1        | 596  | 17 | 0.0457531 |
| 0.0724485 | 1        | 619  | 17 | 0.0455412 |
| 0.0407063 | 1        | 634  | 18 | 0.0436609 |
| 0.0844706 | 1        | 718  | 13 | 0.0239138 |
| 0.0929825 | 1        | 795  | 20 | 0.0132501 |
| 0.06955   | 1        | 595  | 17 | 0.0408803 |
| 0.0504547 | 1        | 688  | 16 | 0.0414541 |
| 0.0822607 | 1        | 703  | 20 | 0.0233929 |
| 0.0367508 | 1        | 894  | 25 | 0.0493547 |
| 0.128684  | 1        | 1096 | 22 | 0.0174167 |
| 0.0752202 | 1        | 649  | 18 | 0.025644  |
| 0.0352071 | 0.396301 | 757  | 18 | 0.0451087 |
| 0.0890588 | 1        | 757  | 18 | 0.0451087 |
| 0.0743529 | 1        | 632  | 14 | 0.0444466 |
| 0.0696471 | 1        | 592  | 14 | 0.0483484 |
| 0.153765  | 1        | 1307 | 34 | 0.0491252 |
| 0.0981818 | 1        | 837  | 23 | 0.0191911 |
| 0.0784751 | 1        | 669  | 12 | 0.0398475 |
| 0.0845748 | 1        | 721  | 17 | 0.0479864 |
| 0.0728235 | 1        | 619  | 17 | 0.0427341 |
| 0.0919662 | 1        | 783  | 22 | 0.0301284 |
| 0.0678824 | 1        | 577  | 12 | 0.0483484 |
| 0.0723529 | 1        | 615  | 10 | 0.0432461 |
| 0.0865882 | 1        | 736  | 17 | 0.0222454 |
| 0.0861322 | 1        | 736  | 17 | 0.0222454 |
| 0.116235  | 1        | 988  | 27 | 0.0403418 |
| 0.115623  | 1        | 988  | 27 | 0.0403418 |
| 0.104492  | 1        | 898  | 20 | 0.0170548 |
| 0.0713867 | 1        | 609  | 15 | 0.0496019 |
| 0.100762  | 1        | 859  | 17 | 0.0131442 |
| 0.0708235 | 1        | 602  | 17 | 0.0416836 |
| 0.0698781 | 1        | 602  | 17 | 0.0416836 |
| 0.0772941 | 1        | 657  | 19 | 0.0449762 |
| 0.0968235 | 1        | 823  | 20 | 0.0497873 |
| 0.0764706 | 1        | 650  | 18 | 0.0481365 |
| 0.0755138 | 1        | 643  | 18 | 0.0332621 |

|            |           |      |    |            |
|------------|-----------|------|----|------------|
| 0.0918379  | 1         | 782  | 21 | 0.0308434  |
| 0.11762    | 1         | 1018 | 29 | 0.0333945  |
| 0.0992941  | 1         | 844  | 17 | 0.0359545  |
| 0.181914   | 1         | 1551 | 39 | 0.021857   |
| 0.0735294  | 1         | 625  | 11 | 0.0353101  |
| 0.0476651  | 1         | 592  | 13 | 0.0472184  |
| 0.066      | 1         | 561  | 16 | 0.0288925  |
| 0.0547104  | 1         | 561  | 16 | 0.0288925  |
| 0.0865882  | 1         | 736  | 20 | 0.016428   |
| 0.0874118  | 1         | 743  | 17 | 0.0242934  |
| 0.0519802  | 1         | 483  | 12 | 0.0487544  |
| 0.0687874  | 1         | 586  | 16 | 0.0474744  |
| 0.0821374  | 1         | 704  | 20 | 0.0442612  |
| 0.0627792  | 1         | 534  | 15 | 0.0459914  |
| 0.0751765  | 1         | 639  | 18 | 0.0300666  |
| 0.0720721  | 1         | 616  | 13 | 0.0451616  |
| 0.0707059  | 1         | 601  | 17 | 0.0481542  |
| 0.0810622  | 1         | 696  | 16 | 0.0349217  |
| 0.10674    | 1         | 909  | 25 | 0.042381   |
| 0.0827988  | 1         | 710  | 16 | 0.0414188  |
| 0.0730029  | 1         | 626  | 11 | 0.0436698  |
| 0.0692873  | 1         | 594  | 17 | 0.0463975  |
| 0.0753987  | 1         | 643  | 18 | 0.03516    |
| 0.130471   | 1         | 1109 | 29 | 0.00859801 |
| 0.07189    | 1         | 612  | 14 | 0.040995   |
| 0.0937096  | 1         | 797  | 21 | 0.0319115  |
| 0.0839704  | 1         | 714  | 17 | 0.0157571  |
| 0.00246277 | 0.0294118 | 714  | 17 | 0.0157571  |
| 0.0758556  | 1         | 645  | 18 | 0.00564079 |
| 0.0754118  | 1         | 641  | 18 | 0.0382232  |
| 0.0718245  | 1         | 635  | 17 | 0.044632   |
| 0.0640199  | 1         | 1053 | 30 | 0.00767112 |
| 0.0911088  | 1         | 788  | 22 | 0.0470684  |
| 0.0657756  | 1         | 561  | 11 | 0.0428488  |
| 0.117765   | 1         | 1001 | 28 | 0.0246553  |
| 0.0725882  | 1         | 617  | 17 | 0.0488251  |
| 0.107298   | 1         | 913  | 19 | 0.0435815  |
| 0.0932958  | 1         | 796  | 15 | 0.0138239  |
| 0.123652   | 1         | 1055 | 30 | 0.0198619  |
| 0.0763529  | 1         | 649  | 18 | 0.0497166  |
| 0.0910588  | 1         | 774  | 21 | 0.0343038  |
| 0.0685138  | 1         | 591  | 14 | 0.0414805  |
| 0.0708754  | 1         | 604  | 16 | 0.0466005  |
| 0.084      | 1         | 714  | 20 | 0.0149627  |
| 0.102      | 1         | 867  | 24 | 0.0303402  |
| 0.116862   | 1         | 1016 | 27 | 0.0159513  |
| 0.0706433  | 1         | 604  | 17 | 0.0437669  |

|           |          |      |    |            |
|-----------|----------|------|----|------------|
| 0.0687059 | 1        | 584  | 16 | 0.0460797  |
| 0.0788304 | 1        | 674  | 18 | 0.0245935  |
| 0.064822  | 1        | 581  | 17 | 0.0243022  |
| 0.0975702 | 1        | 1032 | 27 | 0.0441553  |
| 0.138595  | 1        | 1180 | 22 | 0.0351777  |
| 0.0810599 | 1        | 725  | 21 | 0.0307639  |
| 0.0765444 | 1        | 653  | 18 | 0.0322646  |
| 0.0872941 | 1        | 742  | 21 | 0.0468742  |
| 0.109889  | 1        | 939  | 26 | 0.031479   |
| 0.131176  | 1        | 1115 | 27 | 0.0220953  |
| 0.0725882 | 1        | 617  | 17 | 0.0310817  |
| 0.0804706 | 1        | 684  | 14 | 0.0489751  |
| 0.0770588 | 1        | 655  | 14 | 0.0341449  |
| 0.0749412 | 1        | 637  | 18 | 0.0362547  |
| 0.064598  | 1        | 1043 | 26 | 0.0229427  |
| 0.0723399 | 1        | 1168 | 29 | 0.0130824  |
| 0.0884602 | 1        | 752  | 21 | 0.0191646  |
| 0.0296129 | 1        | 1104 | 31 | 0.00812133 |
| 0.0734582 | 1        | 667  | 19 | 0.0325471  |
| 0.0324655 | 0.457652 | 673  | 19 | 0.0472449  |
| 0.0781468 | 1        | 673  | 19 | 0.0472449  |
| 0.0732941 | 1        | 623  | 15 | 0.0402712  |
| 0.0322724 | 1        | 581  | 17 | 0.0451263  |
| 0.0411909 | 1        | 606  | 17 | 0.0473155  |
| 0.0957898 | 1        | 835  | 24 | 0.0291485  |
| 0.11521   | 1        | 990  | 24 | 0.0354602  |
| 0.136118  | 1        | 1157 | 28 | 0.0152363  |
| 0.0692941 | 1        | 589  | 16 | 0.0485426  |
| 0.107412  | 1        | 913  | 26 | 0.0333945  |
| 0.147882  | 1        | 1257 | 35 | 0.0122438  |
| 0.153529  | 1        | 1305 | 35 | 0.00963083 |
| 0.0699695 | 1        | 596  | 17 | 0.0493812  |
| 0.0812941 | 1        | 691  | 20 | 0.0474391  |
| 0.0788235 | 1        | 670  | 17 | 0.0355043  |
| 0.0787059 | 1        | 669  | 19 | 0.0329178  |
| 0.0969412 | 1        | 824  | 23 | 0.0366166  |
| 0.105882  | 1        | 900  | 19 | 0.0276919  |
| 0.084     | 1        | 714  | 14 | 0.0336329  |
| 0.0825882 | 1        | 702  | 20 | 0.0498932  |
| 0.106118  | 1        | 902  | 25 | 0.0229339  |
| 0.113294  | 1        | 963  | 27 | 0.0482778  |
| 0.0752941 | 1        | 640  | 18 | 0.029122   |
| 0.0750821 | 1        | 640  | 13 | 0.0374287  |
| 0.0751262 | 1        | 640  | 13 | 0.0374287  |
| 0.0638824 | 1        | 543  | 16 | 0.0315231  |
| 0.0597301 | 1        | 872  | 19 | 0.0164722  |
| 0.0471265 | 1        | 688  | 19 | 0.0383556  |

|           |          |      |    |           |
|-----------|----------|------|----|-----------|
| 0.0664706 | 1        | 565  | 14 | 0.0350012 |
| 0.0729417 | 1        | 637  | 17 | 0.0496019 |
| 0.0771121 | 1        | 659  | 19 | 0.0358045 |
| 0.0727059 | 1        | 618  | 16 | 0.0431048 |
| 0.0860873 | 1        | 732  | 19 | 0.0240374 |
| 0.0841176 | 1        | 715  | 20 | 0.0316379 |
| 0.0343529 | 0.377261 | 774  | 22 | 0.0350629 |
| 0.0898016 | 1        | 774  | 22 | 0.0350629 |
| 0.0761176 | 1        | 647  | 15 | 0.0252644 |
| 0.0481812 | 1        | 604  | 17 | 0.0448527 |
| 0.0544706 | 1        | 463  | 10 | 0.0471478 |
| 0.0776471 | 1        | 660  | 19 | 0.0344097 |
| 0.0863529 | 1        | 734  | 15 | 0.0309052 |
| 0.103412  | 1        | 879  | 24 | 0.0208859 |
| 0.0710184 | 1        | 606  | 14 | 0.0468035 |
| 0.0768235 | 1        | 653  | 18 | 0.0497078 |
| 0.0750588 | 1        | 638  | 11 | 0.0403065 |
| 0.0574527 | 1        | 604  | 16 | 0.0441641 |
| 0.0562161 | 1        | 591  | 17 | 0.0463622 |
| 0.0886694 | 1        | 853  | 24 | 0.0237637 |
| 0.134046  | 1        | 1141 | 20 | 0.0244169 |
| 0.0498347 | 1        | 648  | 18 | 0.0329178 |
| 0.0762357 | 1        | 674  | 19 | 0.0391589 |
| 0.0725882 | 1        | 617  | 17 | 0.049443  |
| 0.0845334 | 1        | 722  | 19 | 0.0443583 |
| 0.106662  | 1        | 911  | 22 | 0.0227132 |
| 0.0536589 | 1        | 767  | 21 | 0.0337123 |
| 0.096165  | 1        | 830  | 23 | 0.0445702 |
| 0.102824  | 1        | 874  | 22 | 0.0479688 |
| 0.0725984 | 1        | 625  | 15 | 0.0220953 |
| 0.114091  | 1        | 970  | 27 | 0.0188909 |
| 0.0452572 | 1        | 959  | 26 | 0.0122438 |
| 0.0724162 | 1        | 618  | 17 | 0.0285747 |
| 0.0716044 | 1        | 611  | 17 | 0.0268533 |
| 0.0741176 | 1        | 630  | 13 | 0.0439964 |
| 0.111412  | 1        | 947  | 21 | 0.0216098 |
| 0.053514  | 1        | 699  | 18 | 0.0488692 |
| 0.0536187 | 1        | 466  | 10 | 0.0386293 |
| 0.133647  | 1        | 1136 | 26 | 0.0244611 |
| 0.0721514 | 1        | 713  | 20 | 0.0324765 |
| 0.0842426 | 1        | 718  | 18 | 0.0350806 |
| 0.0333261 | 1        | 461  | 11 | 0.0375082 |
| 0.0771637 | 1        | 666  | 15 | 0.0141064 |
| 0.0709677 | 1        | 605  | 11 | 0.0447026 |
| 0.036623  | 1        | 593  | 15 | 0.0422927 |
| 0.0694118 | 1        | 590  | 15 | 0.0492576 |
| 0.0744808 | 1        | 746  | 21 | 0.0236931 |

|           |   |      |    |            |
|-----------|---|------|----|------------|
| 0.0471997 | 1 | 402  | 11 | 0.0464769  |
| 0.0934601 | 1 | 796  | 20 | 0.0356897  |
| 0.100481  | 1 | 857  | 19 | 0.0453117  |
| 0.230535  | 1 | 3325 | 69 | 0.0170724  |
| 0.0618481 | 1 | 931  | 23 | 0.032653   |
| 0.0569005 | 1 | 872  | 22 | 0.023799   |
| 0.0705882 | 1 | 600  | 13 | 0.0375788  |
| 0.0817647 | 1 | 695  | 20 | 0.0237196  |
| 0.0995294 | 1 | 846  | 24 | 0.0410215  |
| 0.072     | 1 | 612  | 18 | 0.0484631  |
| 0.0727059 | 1 | 618  | 18 | 0.0488692  |
| 0.08      | 1 | 680  | 19 | 0.0459031  |
| 0.0786108 | 1 | 670  | 19 | 0.0474744  |
| 0.115452  | 1 | 984  | 28 | 0.0102311  |
| 0.0388188 | 1 | 652  | 19 | 0.0495313  |
| 0.210502  | 1 | 1824 | 48 | 0.0102929  |
| 0.052931  | 1 | 521  | 15 | 0.0333945  |
| 0.0637018 | 1 | 1027 | 21 | 0.0271182  |
| 0.0758824 | 1 | 645  | 18 | 0.0460356  |
| 0.114588  | 1 | 974  | 27 | 0.0497784  |
| 0.0809412 | 1 | 688  | 20 | 0.0354867  |
| 0.0812941 | 1 | 691  | 16 | 0.0493106  |
| 0.0808235 | 1 | 687  | 20 | 0.0492664  |
| 0.107817  | 1 | 920  | 26 | 0.0236931  |
| 0.0988946 | 1 | 841  | 24 | 0.0495048  |
| 0.0564706 | 1 | 480  | 14 | 0.0404477  |
| 0.0561798 | 1 | 480  | 14 | 0.0404477  |
| 0.107536  | 1 | 919  | 18 | 0.0408361  |
| 0.109813  | 1 | 949  | 20 | 0.049646   |
| 0.0819255 | 1 | 708  | 14 | 0.0422309  |
| 0.0631164 | 1 | 672  | 13 | 0.0212743  |
| 0.0285113 | 1 | 447  | 13 | 0.0431225  |
| 0.0978733 | 1 | 833  | 21 | 0.0339242  |
| 0.0765618 | 1 | 652  | 17 | 0.0361134  |
| 0.0701176 | 1 | 596  | 10 | 0.0463357  |
| 0.0359951 | 1 | 618  | 12 | 0.0267739  |
| 0.127772  | 1 | 1089 | 30 | 0.0341537  |
| 0.116941  | 1 | 994  | 28 | 0.0232782  |
| 0.0851765 | 1 | 724  | 19 | 0.0307463  |
| 0.0686509 | 1 | 602  | 17 | 0.0472361  |
| 0.167509  | 1 | 1426 | 35 | 0.0130206  |
| 0.0698824 | 1 | 594  | 13 | 0.036034   |
| 0.101529  | 1 | 863  | 21 | 0.00356632 |
| 0.0712941 | 1 | 606  | 17 | 0.0477569  |
| 0.0411785 | 1 | 608  | 15 | 0.0471567  |
| 0.0655076 | 1 | 584  | 13 | 0.0439258  |
| 0.0874118 | 1 | 743  | 15 | 0.0342596  |

|           |         |      |    |            |
|-----------|---------|------|----|------------|
| 0.0661672 | 1       | 733  | 13 | 0.0353896  |
| 0.119151  | 1       | 1016 | 15 | 0.01167    |
| 0.0591809 | 1       | 604  | 16 | 0.0468389  |
| 0.134476  | 1       | 1153 | 29 | 0.00498755 |
| 0.0812247 | 0.99858 | 704  | 20 | 0.0348334  |
| 0.0911765 | 1       | 775  | 20 | 0.0442524  |
| 0.126235  | 1       | 1073 | 22 | 0.0305697  |
| 0.072629  | 1       | 618  | 17 | 0.0494871  |
| 0.0798226 | 1       | 684  | 19 | 0.0424428  |
| 0.084     | 1       | 714  | 19 | 0.0426546  |
| 0.0540402 | 1       | 634  | 18 | 0.0430342  |
| 0.0780316 | 1       | 666  | 16 | 0.0461503  |
| 0.0749115 | 1       | 656  | 16 | 0.0396533  |
| 0.0804598 | 1       | 686  | 14 | 0.0361134  |
| 0.0737647 | 1       | 627  | 18 | 0.0348864  |
| 0.0809412 | 1       | 688  | 19 | 0.0351512  |
| 0.072     | 1       | 612  | 15 | 0.0420808  |
| 0.0750588 | 1       | 638  | 17 | 0.0484631  |
| 0.0993898 | 1       | 847  | 13 | 0.0470066  |
| 0.076     | 1       | 646  | 18 | 0.0381791  |
| 0.103281  | 1       | 894  | 22 | 0.0280715  |
| 0.135529  | 1       | 1152 | 28 | 0.0167105  |
| 0.0433855 | 1       | 671  | 16 | 0.0408361  |
| 0.0734698 | 1       | 671  | 16 | 0.0408361  |
| 0.0750381 | 1       | 640  | 18 | 0.0483484  |
| 0.0593803 | 1       | 596  | 17 | 0.0464681  |
| 0.0724348 | 1       | 617  | 17 | 0.0494695  |
| 0.0234557 | 1       | 868  | 23 | 0.027383   |
| 0.0703364 | 1       | 598  | 17 | 0.0479776  |
| 0.078114  | 1       | 666  | 19 | 0.0331739  |
| 0.086545  | 1       | 759  | 17 | 0.0492576  |
| 0.0869412 | 1       | 739  | 20 | 0.0277096  |
| 0.0711765 | 1       | 605  | 11 | 0.0363518  |
| 0.102336  | 1       | 876  | 24 | 0.0467771  |
| 0.127667  | 1       | 1089 | 28 | 0.0159337  |
| 0.0415137 | 1       | 622  | 18 | 0.0487721  |
| 0.0708235 | 1       | 602  | 17 | 0.0468389  |
| 0.104474  | 1       | 899  | 22 | 0.0333151  |
| 0.105765  | 1       | 899  | 22 | 0.0333151  |
| 0.100291  | 1       | 863  | 24 | 0.0279921  |
| 0.0728196 | 1       | 688  | 19 | 0.0367755  |
| 0.0801301 | 1       | 690  | 14 | 0.0452411  |
| 0.0388447 | 1       | 815  | 19 | 0.0158189  |
| 0.0945915 | 1       | 815  | 19 | 0.0158189  |
| 0.0821149 | 1       | 702  | 20 | 0.0284246  |
| 0.0693648 | 1       | 593  | 17 | 0.0490193  |
| 0.0729412 | 1       | 620  | 18 | 0.0495313  |



|           |          |      |    |           |
|-----------|----------|------|----|-----------|
| 0.0807974 | 1        | 1147 | 31 | 0.023596  |
| 0.0682263 | 1        | 627  | 12 | 0.0460797 |
| 0.0125853 | 0.136132 | 786  | 20 | 0.0332798 |
| 0.0924706 | 1        | 786  | 20 | 0.0332798 |
| 0.0749412 | 1        | 637  | 18 | 0.0499638 |
| 0.0803535 | 1        | 973  | 24 | 0.0206035 |
| 0.0697265 | 1        | 594  | 13 | 0.022007  |
| 0.128588  | 1        | 1093 | 23 | 0.024567  |
| 0.0995322 | 1        | 851  | 22 | 0.0343038 |
| 0.0694885 | 1        | 591  | 16 | 0.0461062 |
| 0.0950486 | 1        | 812  | 22 | 0.0353013 |
| 0.0652735 | 1        | 556  | 10 | 0.043608  |
| 0.0658412 | 1        | 569  | 16 | 0.0226338 |
| 0.0596717 | 1        | 927  | 26 | 0.0314172 |
| 0.108637  | 1        | 927  | 26 | 0.0314172 |
| 0.0491765 | 1        | 418  | 12 | 0.0492841 |
| 0.0674645 | 1        | 575  | 16 | 0.04668   |
| 0.0716463 | 1        | 611  | 15 | 0.0499108 |
| 0.0400941 | 0.420469 | 811  | 23 | 0.0222189 |
| 0.0938332 | 1        | 811  | 23 | 0.0222189 |
| 0.0272188 | 1        | 372  | 11 | 0.049443  |
| 0.0275226 | 1        | 680  | 19 | 0.0420014 |
| 0.0344781 | 1        | 510  | 15 | 0.0430519 |
| 0.0775892 | 1        | 663  | 15 | 0.0222101 |
| 0.0980094 | 1        | 837  | 20 | 0.0444907 |
| 0.108431  | 1        | 926  | 23 | 0.0298459 |
| 0.0399235 | 1        | 668  | 17 | 0.0357691 |
| 0.0710588 | 1        | 604  | 17 | 0.04284   |
| 0.140706  | 1        | 1196 | 29 | 0.019244  |
| 0.0941757 | 1        | 802  | 16 | 0.0475186 |
| 0.0689857 | 1        | 589  | 16 | 0.045806  |
| 0.0594178 | 1        | 547  | 15 | 0.0453294 |
| 0.0782365 | 1        | 669  | 19 | 0.0428665 |
| 0.0920066 | 1        | 785  | 22 | 0.0481983 |
| 0.108353  | 1        | 921  | 26 | 0.0163927 |
| 0.121785  | 1        | 1056 | 25 | 0.0237902 |
| 0.0844607 | 1        | 718  | 21 | 0.0499991 |
| 0.0705882 | 1        | 600  | 17 | 0.0472891 |
| 0.0617355 | 1        | 535  | 15 | 0.0493812 |
| 0.122471  | 1        | 1041 | 24 | 0.0322911 |
| 0.0681262 | 1        | 585  | 13 | 0.0476333 |
| 0.0755638 | 1        | 650  | 13 | 0.0214685 |
| 0.136198  | 1        | 1160 | 27 | 0.0232605 |
| 0.0710588 | 1        | 604  | 13 | 0.0420896 |
| 0.0723529 | 1        | 615  | 16 | 0.0463269 |
| 0.0728235 | 1        | 619  | 13 | 0.0480482 |
| 0.0958824 | 1        | 815  | 20 | 0.0105489 |

|           |          |      |    |           |
|-----------|----------|------|----|-----------|
| 0.0830623 | 1        | 715  | 20 | 0.0484631 |
| 0.0767423 | 1        | 653  | 22 | 0.0468212 |
| 0.077825  | 1        | 677  | 19 | 0.0184584 |
| 0.0823086 | 1        | 917  | 25 | 0.0312318 |
| 0.0969934 | 1        | 842  | 23 | 0.0317967 |
| 0.0744706 | 1        | 633  | 18 | 0.049902  |
| 0.117882  | 1        | 1002 | 28 | 0.0182553 |
| 0.100978  | 1        | 919  | 22 | 0.0233312 |
| 0.0715881 | 0.995098 | 612  | 17 | 0.0401299 |
| 0.0758605 | 1        | 648  | 17 | 0.033421  |
| 0.0718226 | 1        | 612  | 17 | 0.0341449 |
| 0.0905243 | 1        | 770  | 22 | 0.0435992 |
| 0.0575974 | 0.797872 | 658  | 15 | 0.0461238 |
| 0.0784706 | 1        | 667  | 15 | 0.0381438 |
| 0.112353  | 1        | 955  | 23 | 0.0332356 |
| 0.121765  | 1        | 1035 | 29 | 0.0154658 |
| 0.0921853 | 1        | 788  | 22 | 0.0230222 |
| 0.123077  | 1        | 1048 | 29 | 0.0216981 |
| 0.102422  | 1        | 871  | 21 | 0.0291397 |
| 0.10229   | 1        | 871  | 21 | 0.0291397 |
| 0.0806829 | 1        | 690  | 13 | 0.0191822 |
| 0.116633  | 1        | 995  | 25 | 0.0241345 |
| 0.0777647 | 1        | 661  | 18 | 0.0286453 |
| 0.0547356 | 1        | 471  | 10 | 0.0487721 |
| 0.105126  | 1        | 929  | 26 | 0.0462121 |
| 0.124588  | 1        | 1059 | 23 | 0.0113787 |
| 0.094701  | 1        | 806  | 23 | 0.0245847 |
| 0.0918811 | 1        | 782  | 16 | 0.0340389 |
| 0.0843317 | 1        | 718  | 20 | 0.0380555 |
| 0.0602353 | 1        | 512  | 14 | 0.0462121 |
| 0.122588  | 1        | 1042 | 29 | 0.0316026 |
| 0.124941  | 1        | 1062 | 26 | 0.0123144 |
| 0.0728334 | 1        | 774  | 22 | 0.0344362 |
| 0.0499671 | 1        | 531  | 14 | 0.0183083 |
| 0.0708626 | 1        | 939  | 26 | 0.0447909 |
| 0.0704706 | 1        | 599  | 17 | 0.0493989 |
| 0.0417994 | 1        | 1010 | 26 | 0.0237725 |
| 0.0811097 | 1        | 690  | 17 | 0.0486044 |
| 0.127412  | 1        | 1083 | 23 | 0.0114228 |
| 0.047368  | 1        | 638  | 15 | 0.0378701 |
| 0.0604351 | 1        | 814  | 17 | 0.0354867 |
| 0.0768163 | 1        | 664  | 14 | 0.035672  |
| 0.0688235 | 1        | 585  | 17 | 0.034957  |
| 0.0960724 | 1        | 817  | 23 | 0.0408803 |
| 0.0701241 | 1        | 599  | 16 | 0.0483837 |
| 0.125073  | 1        | 1068 | 29 | 0.0335181 |
| 0.0385014 | 1        | 557  | 16 | 0.0480041 |

|           |          |      |    |            |
|-----------|----------|------|----|------------|
| 0.0743529 | 1        | 632  | 18 | 0.0242227  |
| 0.086     | 1        | 731  | 20 | 0.0349129  |
| 0.074513  | 1        | 635  | 18 | 0.0408626  |
| 0.0618537 | 1        | 975  | 23 | 0.0148832  |
| 0.0803405 | 1        | 689  | 18 | 0.0349482  |
| 0.0967059 | 1        | 822  | 19 | 0.0456295  |
| 0.062712  | 1        | 610  | 15 | 0.0468742  |
| 0.069893  | 1        | 660  | 18 | 0.0239667  |
| 0.128277  | 1        | 1091 | 24 | 0.0173549  |
| 0.0695294 | 1        | 591  | 17 | 0.0379142  |
| 0.122941  | 1        | 1045 | 30 | 0.0194382  |
| 0.0975009 | 1        | 831  | 23 | 0.0466535  |
| 0.0728235 | 1        | 619  | 15 | 0.049646   |
| 0.138588  | 1        | 1178 | 32 | 0.0135856  |
| 0.0871849 | 1        | 747  | 21 | 0.0237725  |
| 0.0669367 | 1        | 595  | 17 | 0.04156    |
| 0.0783529 | 1        | 666  | 19 | 0.0479511  |
| 0.235882  | 1        | 2005 | 56 | 0.0240374  |
| 0.0710588 | 1        | 604  | 17 | 0.0494695  |
| 0.0884706 | 1        | 752  | 21 | 0.0475098  |
| 0.102471  | 1        | 871  | 19 | 0.0235783  |
| 0.0954444 | 1        | 815  | 16 | 0.034957   |
| 0.0507091 | 1        | 851  | 21 | 0.0476598  |
| 0.0682353 | 1        | 580  | 16 | 0.0454971  |
| 0.0754118 | 1        | 641  | 12 | 0.0434491  |
| 0.0974013 | 1        | 967  | 24 | 0.00810367 |
| 0.0735294 | 1        | 625  | 18 | 0.0453558  |
| 0.0686571 | 1        | 591  | 12 | 0.0395826  |
| 0.0633512 | 1        | 614  | 18 | 0.0428665  |
| 0.0718703 | 1        | 616  | 17 | 0.0453294  |
| 0.0511478 | 1        | 840  | 20 | 0.00890698 |
| 0.0487925 | 1        | 596  | 13 | 0.0298194  |
| 0.0749648 | 1        | 639  | 13 | 0.0336594  |
| 0.0675307 | 1        | 594  | 12 | 0.0458325  |
| 0.120282  | 1        | 1058 | 28 | 0.0308434  |
| 0.0736471 | 1        | 626  | 16 | 0.0437934  |
| 0.0752789 | 1        | 641  | 12 | 0.0423898  |
| 0.0845946 | 1        | 721  | 19 | 0.0350012  |
| 0.0923817 | 1        | 787  | 22 | 0.0297576  |
| 0.114423  | 1        | 979  | 27 | 0.0355838  |
| 0.100329  | 1        | 855  | 24 | 0.0468212  |
| 0.0712941 | 0.993443 | 610  | 17 | 0.0493724  |
| 0.0543339 | 1        | 761  | 21 | 0.047854   |
| 0.0829247 | 1        | 761  | 21 | 0.047854   |
| 0.0995294 | 1        | 846  | 24 | 0.0213096  |
| 0.0682353 | 1        | 580  | 16 | 0.0439611  |
| 0.0723529 | 1        | 615  | 17 | 0.0391677  |

|           |   |      |    |            |
|-----------|---|------|----|------------|
| 0.0768235 | 1 | 653  | 15 | 0.043864   |
| 0.118824  | 1 | 1010 | 28 | 0.0233929  |
| 0.0696645 | 1 | 598  | 16 | 0.0357515  |
| 0.0711765 | 1 | 605  | 12 | 0.044376   |
| 0.07      | 1 | 595  | 16 | 0.0441641  |
| 0.143327  | 1 | 1219 | 31 | 0.00766229 |
| 0.0712941 | 1 | 606  | 12 | 0.0482778  |
| 0.121176  | 1 | 1030 | 23 | 0.013868   |
| 0.113555  | 1 | 1172 | 32 | 0.0291662  |
| 0.0712941 | 1 | 606  | 17 | 0.032503   |
| 0.126941  | 1 | 1079 | 29 | 0.0169224  |
| 0.0725352 | 1 | 618  | 15 | 0.0430695  |
| 0.118824  | 1 | 1010 | 28 | 0.0307021  |
| 0.120061  | 1 | 1024 | 24 | 0.0126675  |
| 0.0722242 | 1 | 616  | 15 | 0.0403418  |
| 0.0719652 | 1 | 613  | 18 | 0.0280627  |
| 0.068     | 1 | 578  | 10 | 0.0153511  |
| 0.0714118 | 1 | 607  | 10 | 0.0442436  |
| 0.0989412 | 1 | 841  | 21 | 0.0252291  |
| 0.0691147 | 1 | 623  | 13 | 0.0398122  |
| 0.0881176 | 1 | 749  | 21 | 0.0447644  |
| 0.0879418 | 1 | 749  | 21 | 0.0447644  |
| 0.0969562 | 1 | 825  | 23 | 0.0123762  |
| 0.0534118 | 1 | 454  | 13 | 0.0355043  |
| 0.115412  | 1 | 981  | 18 | 0.0231723  |
| 0.0788769 | 1 | 677  | 18 | 0.0480306  |
| 0.124251  | 1 | 1057 | 29 | 0.0327413  |
| 0.0794118 | 1 | 675  | 16 | 0.0397239  |
| 0.111686  | 1 | 950  | 21 | 0.0239579  |
| 0.0705924 | 1 | 603  | 16 | 0.0236401  |
| 0.0734603 | 1 | 625  | 15 | 0.0443318  |
| 0.0728235 | 1 | 619  | 18 | 0.0483484  |
| 0.0394118 | 1 | 335  | 10 | 0.0462827  |
| 0.135294  | 1 | 1150 | 26 | 0.0169047  |
| 0.0748235 | 1 | 636  | 18 | 0.0378171  |
| 0.0783692 | 1 | 667  | 18 | 0.0360516  |
| 0.0762543 | 1 | 649  | 18 | 0.0465387  |
| 0.0785371 | 1 | 670  | 17 | 0.0484631  |
| 0.0612353 | 1 | 1041 | 28 | 0.0172225  |
| 0.0917    | 1 | 780  | 22 | 0.0290426  |
| 0.060806  | 1 | 599  | 14 | 0.042328   |
| 0.0566566 | 1 | 769  | 18 | 0.0485249  |
| 0.0707287 | 1 | 960  | 27 | 0.0325383  |
| 0.0931765 | 1 | 792  | 22 | 0.031682   |
| 0.0811765 | 1 | 690  | 13 | 0.0498755  |
| 0.134941  | 1 | 1147 | 24 | 0.0152804  |
| 0.0790588 | 1 | 672  | 18 | 0.0490104  |

|           |          |      |    |           |
|-----------|----------|------|----|-----------|
| 0.0756471 | 1        | 643  | 18 | 0.0314878 |
| 0.0923529 | 1        | 785  | 17 | 0.0403948 |
| 0.0692941 | 1        | 589  | 11 | 0.0292368 |
| 0.072     | 1        | 612  | 17 | 0.0499815 |
| 0.111636  | 1        | 992  | 21 | 0.0481188 |
| 0.0659341 | 1        | 588  | 14 | 0.0385851 |
| 0.132941  | 1        | 1130 | 32 | 0.0344715 |
| 0.0955294 | 1        | 812  | 22 | 0.024567  |
| 0.078481  | 1        | 682  | 19 | 0.0233929 |
| 0.110693  | 1        | 941  | 26 | 0.0326619 |
| 0.0875    | 1        | 749  | 21 | 0.0292279 |
| 0.0747893 | 1        | 639  | 15 | 0.0336947 |
| 0.0821194 | 1        | 699  | 18 | 0.0271005 |
| 0.0550409 | 1        | 707  | 20 | 0.0489222 |
| 0.0166667 | 0.200849 | 707  | 20 | 0.0489222 |
| 0.0908132 | 1        | 775  | 18 | 0.0308257 |
| 0.106706  | 1        | 907  | 21 | 0.0318674 |
| 0.113412  | 1        | 964  | 24 | 0.0224925 |
| 0.0346938 | 0.921951 | 615  | 17 | 0.0232782 |
| 0.0574118 | 1        | 488  | 14 | 0.0439258 |
| 0.036838  | 1        | 809  | 16 | 0.0331827 |
| 0.106876  | 1        | 914  | 24 | 0.0291485 |
| 0.0863647 | 1        | 736  | 18 | 0.0489222 |
| 0.115489  | 1        | 982  | 28 | 0.0354425 |
| 0.0715294 | 1        | 608  | 10 | 0.0432637 |
| 0.0650588 | 1        | 553  | 11 | 0.0444907 |
| 0.0750588 | 1        | 638  | 16 | 0.0436433 |
| 0.0688235 | 1        | 585  | 12 | 0.0417542 |
| 0.054     | 1        | 459  | 13 | 0.0493017 |
| 0.111176  | 1        | 945  | 26 | 0.0246994 |
| 0.0529162 | 1        | 499  | 14 | 0.0472802 |
| 0.125882  | 1        | 1070 | 25 | 0.0245317 |
| 0.0764264 | 1        | 651  | 17 | 0.049849  |
| 0.137765  | 1        | 1171 | 31 | 0.016737  |
| 0.102324  | 1        | 929  | 22 | 0.0261295 |
| 0.0615294 | 1        | 523  | 15 | 0.0486485 |
| 0.122588  | 1        | 1042 | 38 | 0.0233223 |
| 0.0762353 | 1        | 648  | 17 | 0.0365371 |
| 0.115882  | 1        | 985  | 20 | 0.012897  |
| 0.0998823 | 1        | 849  | 24 | 0.0192264 |
| 0.078553  | 1        | 671  | 19 | 0.0482778 |
| 0.0864706 | 1        | 735  | 21 | 0.0235783 |
| 0.0741044 | 1        | 633  | 15 | 0.0433873 |
| 0.0758411 | 1        | 674  | 19 | 0.0338447 |
| 0.0678815 | 1        | 596  | 14 | 0.0462739 |
| 0.0397764 | 1        | 619  | 15 | 0.0437845 |
| 0.121686  | 1        | 1042 | 30 | 0.0337653 |

|           |          |      |    |           |
|-----------|----------|------|----|-----------|
| 0.120169  | 1        | 1023 | 20 | 0.0203033 |
| 0.114824  | 1        | 976  | 21 | 0.0159425 |
| 0.0950588 | 1        | 808  | 21 | 0.0460002 |
| 0.0695294 | 1        | 591  | 11 | 0.0425222 |
| 0.0460187 | 1        | 660  | 18 | 0.0483042 |
| 0.0399024 | 1        | 605  | 11 | 0.0491693 |
| 0.0960611 | 1        | 817  | 20 | 0.0334122 |
| 0.0911223 | 1        | 1049 | 29 | 0.019809  |
| 0.123412  | 1        | 1049 | 29 | 0.019809  |
| 0.055681  | 0.993798 | 645  | 18 | 0.0294839 |
| 0.0987669 | 1        | 841  | 22 | 0.0310817 |
| 0.0964181 | 1        | 821  | 23 | 0.0477569 |
| 0.115059  | 1        | 978  | 27 | 0.0239844 |
| 0.0870632 | 1        | 745  | 21 | 0.0463357 |
| 0.0441744 | 0.493473 | 766  | 21 | 0.0461503 |
| 0.114471  | 1        | 973  | 27 | 0.020983  |
| 0.0748235 | 1        | 636  | 18 | 0.0405625 |
| 0.120588  | 1        | 1025 | 24 | 0.0323794 |
| 0.0411141 | 1        | 617  | 15 | 0.0482336 |
| 0.0524422 | 1        | 787  | 17 | 0.0320704 |
| 0.0668235 | 1        | 568  | 16 | 0.0446232 |
| 0.0868752 | 1        | 836  | 18 | 0.0292633 |
| 0.0888235 | 1        | 755  | 21 | 0.0307551 |
| 0.0707059 | 1        | 601  | 17 | 0.0443583 |
| 0.0850588 | 1        | 723  | 20 | 0.0435021 |
| 0.0888235 | 1        | 755  | 19 | 0.0242051 |
| 0.0727059 | 1        | 618  | 17 | 0.0452676 |
| 0.0956471 | 1        | 813  | 23 | 0.0296164 |
| 0.104353  | 1        | 887  | 25 | 0.0490634 |
| 0.0775832 | 1        | 660  | 18 | 0.0419396 |
| 0.115294  | 1        | 980  | 24 | 0.0269857 |
| 0.0781305 | 1        | 667  | 19 | 0.0437669 |
| 0.131335  | 1        | 1117 | 28 | 0.0278244 |
| 0.0441004 | 1        | 527  | 10 | 0.0493812 |
| 0.110222  | 1        | 937  | 24 | 0.0325648 |
| 0.0654853 | 1        | 558  | 14 | 0.0452146 |
| 0.0785882 | 1        | 668  | 19 | 0.0403859 |
| 0.0872964 | 1        | 1061 | 28 | 0.0218481 |
| 0.0716471 | 1        | 609  | 11 | 0.0477481 |
| 0.0104768 | 1        | 653  | 17 | 0.0499815 |
| 0.0698064 | 1        | 667  | 19 | 0.0440141 |
| 0.101059  | 1        | 859  | 24 | 0.0242757 |
| 0.0775759 | 1        | 777  | 22 | 0.0465387 |
| 0.0489839 | 1        | 417  | 12 | 0.04668   |
| 0.192824  | 1        | 1639 | 41 | 0.0213714 |
| 0.103647  | 1        | 881  | 24 | 0.0221836 |
| 0.100867  | 1        | 861  | 20 | 0.0237019 |

|           |          |      |    |           |
|-----------|----------|------|----|-----------|
| 0.0771765 | 1        | 656  | 19 | 0.0335093 |
| 0.0718824 | 1        | 611  | 13 | 0.0497343 |
| 0.0481439 | 1        | 664  | 19 | 0.0354867 |
| 0.0413223 | 1        | 500  | 12 | 0.0420808 |
| 0.0781176 | 1        | 664  | 19 | 0.0361399 |
| 0.0779859 | 1        | 666  | 13 | 0.0460002 |
| 0.0977647 | 1        | 831  | 16 | 0.0217863 |
| 0.0566303 | 1        | 483  | 13 | 0.0449498 |
| 0.0797084 | 1        | 678  | 18 | 0.0215127 |
| 0.0813257 | 1        | 692  | 12 | 0.0151657 |
| 0.0534274 | 1        | 901  | 20 | 0.0260942 |
| 0.0696471 | 1        | 592  | 17 | 0.0292279 |
| 0.0389371 | 0.937943 | 564  | 12 | 0.0475362 |
| 0.0657649 | 1        | 564  | 12 | 0.0475362 |
| 0.072     | 1        | 612  | 16 | 0.0398122 |
| 0.0796584 | 1        | 681  | 19 | 0.0473509 |
| 0.0717043 | 1        | 613  | 11 | 0.042787  |
| 0.0941176 | 1        | 800  | 21 | 0.0218923 |
| 0.0522353 | 1        | 444  | 13 | 0.035928  |
| 0.0951991 | 1        | 813  | 20 | 0.0461503 |
| 0.112529  | 1        | 961  | 21 | 0.0346922 |
| 0.0696471 | 1        | 592  | 11 | 0.0323441 |
| 0.0295693 | 0.433007 | 612  | 17 | 0.0447644 |
| 0.0214812 | 1        | 612  | 17 | 0.0447644 |
| 0.0672424 | 1        | 584  | 12 | 0.0400681 |
| 0.167761  | 1        | 1457 | 36 | 0.0128617 |
| 0.0515294 | 1        | 438  | 12 | 0.0480041 |
| 0.0481694 | 1        | 771  | 22 | 0.0286983 |
| 0.0484193 | 1        | 775  | 22 | 0.0358045 |
| 0.0692308 | 1        | 594  | 17 | 0.0462739 |
| 0.0696471 | 1        | 592  | 11 | 0.0445437 |
| 0.0805882 | 1        | 685  | 14 | 0.0231634 |
| 0.111294  | 1        | 946  | 25 | 0.0352483 |
| 0.0914118 | 1        | 777  | 22 | 0.0454265 |
| 0.0718824 | 1        | 611  | 11 | 0.0310906 |
| 0.131647  | 1        | 1119 | 29 | 0.0216892 |
| 0.0803991 | 1        | 685  | 18 | 0.0268798 |
| 0.0753296 | 1        | 720  | 14 | 0.0229427 |
| 0.0627596 | 1        | 680  | 15 | 0.0447644 |
| 0.0867059 | 1        | 737  | 18 | 0.0463357 |
| 0.102257  | 1        | 870  | 21 | 0.0199414 |
| 0.0976471 | 1        | 830  | 23 | 0.0107254 |
| 0.0838702 | 1        | 716  | 17 | 0.029122  |
| 0.0722255 | 1        | 615  | 18 | 0.0415953 |
| 0.175807  | 1        | 1497 | 37 | 0.0358221 |
| 0.0961741 | 1        | 822  | 23 | 0.0447644 |
| 0.281294  | 1        | 2391 | 52 | 0.0176551 |

|           |          |      |    |            |
|-----------|----------|------|----|------------|
| 0.101122  | 1        | 865  | 24 | 0.0222454  |
| 0.0411051 | 1        | 674  | 18 | 0.0185643  |
| 0.107412  | 1        | 913  | 26 | 0.00984269 |
| 0.0985538 | 1        | 845  | 20 | 0.0332356  |
| 0.0722353 | 1        | 614  | 17 | 0.0477922  |
| 0.101627  | 1        | 868  | 21 | 0.0266591  |
| 0.0750937 | 1        | 641  | 18 | 0.0365371  |
| 0.0743016 | 1        | 641  | 18 | 0.0365371  |
| 0.0704706 | 1        | 599  | 17 | 0.049134   |
| 0.141647  | 1        | 1204 | 34 | 0.0130912  |
| 0.0692849 | 1        | 591  | 11 | 0.0480041  |
| 0.107503  | 1        | 917  | 21 | 0.023543   |
| 0.117412  | 1        | 998  | 24 | 0.0172578  |
| 0.0723529 | 1        | 615  | 14 | 0.0457707  |
| 0.0877647 | 1        | 746  | 21 | 0.0340301  |
| 0.129437  | 1        | 1105 | 31 | 0.0229957  |
| 0.0807059 | 1        | 686  | 20 | 0.0406596  |
| 0.165412  | 1        | 1406 | 37 | 0.00839498 |
| 0.105882  | 1        | 900  | 20 | 0.0332886  |
| 0.0798824 | 1        | 679  | 17 | 0.0408714  |
| 0.0701176 | 1        | 596  | 16 | 0.0368108  |
| 0.0463013 | 1        | 768  | 22 | 0.0310994  |
| 0.0747248 | 1        | 638  | 16 | 0.0357074  |
| 0.0423646 | 1        | 693  | 14 | 0.0309405  |
| 0.0785882 | 1        | 668  | 16 | 0.0440317  |
| 0.0533239 | 1        | 454  | 13 | 0.0375788  |
| 0.0707013 | 1        | 618  | 15 | 0.0402535  |
| 0.0736471 | 1        | 626  | 14 | 0.046936   |
| 0.0854118 | 1        | 726  | 19 | 0.0158454  |
| 0.118235  | 1        | 1005 | 21 | 0.0373404  |
| 0.114588  | 1        | 974  | 21 | 0.0361134  |
| 0.0903529 | 1        | 768  | 21 | 0.0278244  |
| 0.131829  | 1        | 1122 | 32 | 0.0272241  |
| 0.0989541 | 1        | 842  | 21 | 0.031223   |
| 0.104706  | 1        | 890  | 25 | 0.0353896  |
| 0.0436884 | 1        | 479  | 10 | 0.0424604  |
| 0.0561482 | 1        | 479  | 10 | 0.0424604  |
| 0.0704706 | 1        | 599  | 17 | 0.0443583  |
| 0.0311765 | 0.421304 | 629  | 18 | 0.0386381  |
| 0.0500988 | 1        | 786  | 20 | 0.0437934  |
| 0.067882  | 1        | 1065 | 25 | 0.0408979  |
| 0.0957255 | 1        | 851  | 20 | 0.0210095  |
| 0.0902485 | 1        | 770  | 21 | 0.0201974  |
| 0.129533  | 1        | 1118 | 32 | 0.0247347  |
| 0.0347592 | 1        | 685  | 18 | 0.0377642  |
| 0.0792382 | 1        | 674  | 17 | 0.0436345  |
| 0.0806688 | 1        | 772  | 21 | 0.0338006  |



|           |   |      |    |           |
|-----------|---|------|----|-----------|
| 0.0555619 | 1 | 487  | 14 | 0.0302078 |
| 0.0289763 | 1 | 640  | 11 | 0.0480129 |
| 0.101059  | 1 | 859  | 20 | 0.0268798 |
| 0.106     | 1 | 901  | 20 | 0.0129941 |
| 0.0705882 | 1 | 600  | 10 | 0.0247347 |
| 0.0929412 | 1 | 790  | 22 | 0.0332268 |
| 0.0711518 | 1 | 606  | 17 | 0.0421603 |
| 0.131765  | 1 | 1120 | 28 | 0.0163662 |
| 0.0745882 | 1 | 634  | 18 | 0.0368108 |
| 0.100141  | 1 | 852  | 24 | 0.034957  |
| 0.120663  | 1 | 1033 | 29 | 0.0146802 |
| 0.0968345 | 1 | 829  | 22 | 0.0391501 |
| 0.0707059 | 1 | 601  | 17 | 0.0463357 |
| 0.0817647 | 1 | 695  | 20 | 0.0354425 |
| 0.138905  | 1 | 1185 | 32 | 0.0166399 |
| 0.0744818 | 1 | 636  | 18 | 0.0441288 |
| 0.0677137 | 1 | 1052 | 19 | 0.021089  |
| 0.0744706 | 1 | 633  | 14 | 0.0475274 |
| 0.0795294 | 1 | 676  | 17 | 0.035725  |
| 0.0681176 | 1 | 579  | 15 | 0.0305256 |
| 0.0720374 | 1 | 617  | 14 | 0.0463357 |
| 0.0826427 | 1 | 708  | 19 | 0.0344803 |
| 0.0715294 | 1 | 608  | 16 | 0.0391236 |
| 0.0969412 | 1 | 824  | 17 | 0.038488  |
| 0.0736748 | 1 | 656  | 19 | 0.0350629 |
| 0.0624222 | 1 | 602  | 10 | 0.0482866 |
| 0.137582  | 1 | 1170 | 30 | 0.0040077 |
| 0.0390949 | 1 | 584  | 17 | 0.0439258 |
| 0.114     | 1 | 969  | 27 | 0.0142035 |
| 0.048597  | 1 | 788  | 22 | 0.0264561 |
| 0.109582  | 1 | 1202 | 33 | 0.013153  |
| 0.130824  | 1 | 1112 | 29 | 0.0224749 |
| 0.0704706 | 1 | 599  | 14 | 0.0359987 |
| 0.0922353 | 1 | 784  | 17 | 0.0351247 |
| 0.104551  | 1 | 889  | 17 | 0.0336152 |
| 0.0700094 | 1 | 599  | 17 | 0.0219894 |
| 0.0429208 | 1 | 713  | 19 | 0.0289455 |
| 0.0393089 | 1 | 653  | 11 | 0.0338006 |
| 0.0379244 | 1 | 630  | 12 | 0.0437404 |
| 0.0714621 | 1 | 609  | 16 | 0.0492311 |
| 0.0582353 | 1 | 495  | 14 | 0.0463798 |
| 0.0884114 | 1 | 753  | 21 | 0.0282128 |
| 0.0778823 | 1 | 662  | 18 | 0.027127  |
| 0.0382062 | 1 | 587  | 17 | 0.0491693 |
| 0.0710588 | 1 | 604  | 17 | 0.0438287 |
| 0.064     | 1 | 544  | 11 | 0.0480482 |
| 0.0820626 | 1 | 705  | 20 | 0.0487721 |

|            |          |      |    |            |
|------------|----------|------|----|------------|
| 0.110488   | 1        | 945  | 23 | 0.0361575  |
| 0.0404324  | 1        | 591  | 16 | 0.027127   |
| 0.03838    | 1        | 561  | 12 | 0.0342067  |
| 0.0157429  | 1        | 985  | 27 | 0.0127028  |
| 0.127176   | 1        | 1081 | 30 | 0.0127911  |
| 0.00978136 | 1        | 612  | 11 | 0.0295104  |
| 0.0803419  | 1        | 705  | 14 | 0.0335358  |
| 0.0896471  | 1        | 762  | 22 | 0.01694    |
| 0.0985916  | 1        | 840  | 24 | 0.0151039  |
| 0.187793   | 1        | 1600 | 38 | 0.015254   |
| 0.0901408  | 1        | 768  | 22 | 0.0314172  |
| 0.0808461  | 1        | 688  | 16 | 0.0342067  |
| 0.0481616  | 1        | 410  | 10 | 0.0480041  |
| 0.0830588  | 1        | 706  | 18 | 0.0463622  |
| 0.0670642  | 1        | 596  | 13 | 0.047704   |
| 0.0705882  | 1        | 600  | 17 | 0.0475362  |
| 0.0935517  | 1        | 914  | 24 | 0.0244699  |
| 0.20174    | 1        | 1971 | 54 | 0.0222454  |
| 0.0343564  | 1        | 347  | 10 | 0.0477393  |
| 0.090396   | 1        | 913  | 25 | 0.00707085 |
| 0.0761176  | 0.876694 | 738  | 19 | 0.0482866  |
| 0.129408   | 1        | 1101 | 29 | 0.0492488  |
| 0.0538507  | 1        | 637  | 18 | 0.0408185  |
| 0.0665314  | 1        | 787  | 22 | 0.0399004  |
| 0.0494547  | 1        | 585  | 17 | 0.0388941  |
| 0.0810329  | 1        | 954  | 24 | 0.0426546  |
| 0.104471   | 1        | 888  | 21 | 0.0304638  |
| 0.072625   | 1        | 620  | 17 | 0.0163927  |
| 0.112941   | 1        | 960  | 24 | 0.0487456  |
| 0.0386038  | 1        | 574  | 16 | 0.0472361  |
| 0.0352353  | 1        | 804  | 23 | 0.0333769  |
| 0.0496637  | 1        | 443  | 13 | 0.042584   |
| 0.0971765  | 1        | 826  | 23 | 0.0348334  |
| 0.132118   | 1        | 1123 | 31 | 0.0246729  |
| 0.0719746  | 1        | 612  | 18 | 0.0466976  |
| 0.0816279  | 1        | 694  | 20 | 0.034189   |
| 0.0715294  | 1        | 608  | 17 | 0.0491252  |
| 0.0705721  | 1        | 618  | 14 | 0.0375964  |
| 0.0425081  | 1        | 381  | 11 | 0.0452852  |
| 0.0756776  | 1        | 645  | 16 | 0.0447909  |
| 0.0791882  | 1        | 675  | 18 | 0.0480747  |
| 0.0923836  | 1        | 786  | 19 | 0.0361399  |
| 0.0890588  | 1        | 757  | 17 | 0.0318762  |
| 0.0719915  | 1        | 612  | 17 | 0.0439964  |
| 0.0575716  | 1        | 541  | 12 | 0.0490369  |
| 0.0532075  | 1        | 851  | 24 | 0.0296517  |
| 0.0489559  | 1        | 783  | 22 | 0.034957   |

|           |          |      |    |           |
|-----------|----------|------|----|-----------|
| 0.0910588 | 1        | 774  | 22 | 0.0147596 |
| 0.0710588 | 1        | 604  | 15 | 0.0480041 |
| 0.0585591 | 1        | 508  | 14 | 0.0499815 |
| 0.080649  | 1        | 686  | 19 | 0.0497343 |
| 0.0658917 | 1        | 1009 | 24 | 0.0244876 |
| 0.071333  | 1        | 746  | 21 | 0.0451087 |
| 0.0664706 | 1        | 565  | 16 | 0.0498844 |
| 0.0894118 | 1        | 760  | 21 | 0.0242757 |
| 0.0687023 | 1        | 585  | 13 | 0.0349747 |
| 0.0609765 | 1        | 818  | 20 | 0.0437227 |
| 0.039733  | 1        | 637  | 18 | 0.0431136 |
| 0.0765882 | 1        | 651  | 18 | 0.0222807 |
| 0.0743569 | 1        | 633  | 18 | 0.0201356 |
| 0.0711518 | 1        | 606  | 17 | 0.0473244 |
| 0.104609  | 1        | 892  | 18 | 0.0251055 |
| 0.103529  | 1        | 880  | 20 | 0.0284335 |
| 0.0765882 | 1        | 651  | 18 | 0.0436609 |
| 0.0118824 | 0.115561 | 874  | 25 | 0.0410127 |
| 0.0808093 | 1        | 691  | 19 | 0.0413923 |
| 0.0915682 | 1        | 783  | 21 | 0.0455147 |
| 0.126588  | 1        | 1076 | 29 | 0.0188026 |
| 0.11243   | 1        | 966  | 20 | 0.0309935 |
| 0.076     | 1        | 646  | 18 | 0.0294486 |
| 0.0951821 | 1        | 810  | 18 | 0.035213  |
| 0.08      | 1        | 680  | 18 | 0.0326707 |
| 0.072     | 1        | 612  | 17 | 0.0467064 |
| 0.132235  | 1        | 1124 | 32 | 0.0354778 |
| 0.0976471 | 1        | 830  | 19 | 0.0322205 |
| 0.0895294 | 1        | 761  | 21 | 0.0266415 |
| 0.0684706 | 1        | 582  | 11 | 0.0414717 |
| 0.0798309 | 1        | 680  | 16 | 0.0471567 |
| 0.0770588 | 1        | 655  | 19 | 0.0487986 |
| 0.0876593 | 1        | 846  | 22 | 0.0163044 |
| 0.0713785 | 1        | 611  | 17 | 0.0488251 |
| 0.0752941 | 1        | 640  | 17 | 0.0491252 |
| 0.0724706 | 1        | 616  | 15 | 0.0470507 |
| 0.0609178 | 1        | 604  | 17 | 0.0473597 |
| 0.11401   | 1        | 979  | 27 | 0.0460532 |
| 0.0940681 | 1        | 804  | 22 | 0.0283452 |
| 0.119176  | 1        | 1013 | 23 | 0.0241521 |
| 0.0768812 | 1        | 706  | 18 | 0.0229781 |
| 0.0657111 | 1        | 596  | 17 | 0.039459  |
| 0.0596471 | 1        | 507  | 14 | 0.0492223 |
| 0.0798309 | 1        | 680  | 19 | 0.0344097 |
| 0.0543529 | 1        | 462  | 12 | 0.0487368 |
| 0.0444262 | 1        | 379  | 11 | 0.0438993 |
| 0.0703529 | 1        | 598  | 17 | 0.0465476 |

|           |          |      |    |           |
|-----------|----------|------|----|-----------|
| 0.0735786 | 1        | 638  | 14 | 0.0346922 |
| 0.0784706 | 1        | 667  | 14 | 0.0318497 |
| 0.0701979 | 1        | 603  | 17 | 0.0474391 |
| 0.0909197 | 1        | 781  | 20 | 0.0453911 |
| 0.0571275 | 1        | 531  | 11 | 0.0452411 |
| 0.0723104 | 1        | 615  | 18 | 0.0497961 |
| 0.0712941 | 1        | 606  | 17 | 0.0479776 |
| 0.116941  | 1        | 994  | 27 | 0.0193323 |
| 0.104588  | 1        | 889  | 25 | 0.0299871 |
| 0.0756471 | 1        | 643  | 18 | 0.0476422 |
| 0.0815294 | 0.998559 | 694  | 20 | 0.0313995 |
| 0.0422434 | 1        | 705  | 20 | 0.0449233 |
| 0.0556525 | 1        | 670  | 14 | 0.0261471 |
| 0.0729412 | 1        | 620  | 17 | 0.0465387 |
| 0.0728235 | 1        | 619  | 16 | 0.0435815 |
| 0.0804706 | 1        | 684  | 17 | 0.0306227 |
| 0.122353  | 0.996169 | 1044 | 29 | 0.0232517 |
| 0.0949412 | 1        | 807  | 22 | 0.0428577 |
| 0.12117   | 1        | 1036 | 29 | 0.0236931 |
| 0.0703529 | 1        | 598  | 17 | 0.0498932 |
| 0.0672631 | 1        | 609  | 17 | 0.0399622 |
| 0.0463755 | 1        | 396  | 11 | 0.0414717 |
| 0.0463212 | 1        | 396  | 11 | 0.0414717 |
| 0.0553894 | 1        | 611  | 17 | 0.0440229 |
| 0.0711698 | 1        | 609  | 16 | 0.0484631 |
| 0.0657419 | 1        | 782  | 22 | 0.0346834 |
| 0.0509458 | 1        | 606  | 15 | 0.041101  |
| 0.0720471 | 1        | 857  | 22 | 0.0418778 |
| 0.0873529 | 1        | 757  | 15 | 0.0461062 |
| 0.077011  | 1        | 674  | 19 | 0.040227  |
| 0.0608559 | 1        | 620  | 15 | 0.046574  |
| 0.0680979 | 1        | 590  | 17 | 0.0405625 |
| 0.0735294 | 1        | 625  | 18 | 0.0499108 |
| 0.0823529 | 1        | 700  | 16 | 0.0211508 |
| 0.0911765 | 1        | 775  | 22 | 0.0351512 |
| 0.0641229 | 1        | 605  | 17 | 0.0483837 |
| 0.0789412 | 1        | 671  | 19 | 0.0473244 |
| 0.128268  | 1        | 1094 | 23 | 0.047342  |
| 0.0989062 | 0.997653 | 852  | 22 | 0.0233135 |
| 0.0998823 | 1        | 849  | 24 | 0.0405537 |
| 0.0849289 | 1        | 723  | 19 | 0.0355043 |
| 0.0864706 | 1        | 735  | 20 | 0.0485161 |
| 0.0697647 | 1        | 593  | 16 | 0.0366872 |
| 0.0801831 | 1        | 683  | 19 | 0.0298106 |
| 0.176761  | 1        | 1503 | 34 | 0.0103282 |
| 0.0777995 | 1        | 676  | 19 | 0.0296605 |
| 0.08      | 1        | 680  | 19 | 0.0486485 |

|           |          |      |    |            |
|-----------|----------|------|----|------------|
| 0.0654596 | 1        | 564  | 16 | 0.032653   |
| 0.0580325 | 1        | 971  | 27 | 0.0295722  |
| 0.069675  | 1        | 596  | 17 | 0.0469271  |
| 0.123182  | 1        | 1050 | 24 | 0.032141   |
| 0.0871765 | 1        | 741  | 17 | 0.0170724  |
| 0.0717647 | 1        | 610  | 17 | 0.0492664  |
| 0.0720721 | 1        | 616  | 12 | 0.0414717  |
| 0.0547865 | 1        | 467  | 13 | 0.0498844  |
| 0.0740526 | 0.922078 | 693  | 20 | 0.0401829  |
| 0.0722353 | 1        | 614  | 14 | 0.0326972  |
| 0.0701394 | 1        | 614  | 14 | 0.0326972  |
| 0.0726461 | 1        | 618  | 17 | 0.0459914  |
| 0.0936471 | 1        | 796  | 22 | 0.0479688  |
| 0.0402185 | 1        | 346  | 10 | 0.0445878  |
| 0.0727822 | 1        | 626  | 17 | 0.0437845  |
| 0.0721176 | 1        | 613  | 17 | 0.0474038  |
| 0.0782353 | 1        | 665  | 19 | 0.0460532  |
| 0.0445882 | 1        | 379  | 11 | 0.0339065  |
| 0.110118  | 1        | 936  | 25 | 0.0215127  |
| 0.136824  | 1        | 1163 | 28 | 0.015766   |
| 0.0402188 | 1        | 375  | 11 | 0.047139   |
| 0.0720837 | 1        | 613  | 16 | 0.0216539  |
| 0.0945229 | 1        | 837  | 22 | 0.0344715  |
| 0.0715294 | 1        | 608  | 17 | 0.0490104  |
| 0.0917647 | 1        | 780  | 22 | 0.040739   |
| 0.0805882 | 1        | 685  | 19 | 0.0357427  |
| 0.0821176 | 1        | 698  | 20 | 0.0418248  |
| 0.109412  | 1        | 930  | 26 | 0.0219364  |
| 0.0811765 | 1        | 690  | 20 | 0.0325383  |
| 0.0461861 | 1        | 551  | 16 | 0.0478364  |
| 0.0705882 | 1        | 600  | 17 | 0.0465387  |
| 0.133765  | 1        | 1137 | 32 | 0.0302608  |
| 0.0934118 | 1        | 794  | 22 | 0.0297488  |
| 0.0681293 | 1        | 590  | 14 | 0.0394326  |
| 0.0950588 | 1        | 808  | 22 | 0.0329178  |
| 0.123765  | 1        | 1052 | 29 | 0.0123232  |
| 0.0693142 | 1        | 658  | 16 | 0.0402535  |
| 0.0932941 | 1        | 793  | 16 | 0.0158366  |
| 0.0860041 | 1        | 848  | 22 | 0.00850974 |
| 0.0744884 | 1        | 899  | 17 | 0.0319821  |
| 0.127529  | 1        | 1084 | 30 | 0.0277714  |
| 0.0909412 | 1        | 773  | 22 | 0.0495048  |
| 0.0401795 | 1        | 815  | 22 | 0.0451175  |
| 0.0868751 | 1        | 742  | 18 | 0.0349923  |
| 0.101842  | 1        | 868  | 19 | 0.0312318  |
| 0.0628235 | 1        | 534  | 12 | 0.0445261  |
| 0.141647  | 1        | 1204 | 25 | 0.0242051  |

|            |           |      |    |           |
|------------|-----------|------|----|-----------|
| 0.0668668  | 1         | 579  | 16 | 0.0463798 |
| 0.0832941  | 1         | 708  | 19 | 0.0347628 |
| 0.128824   | 1         | 1095 | 30 | 0.0130206 |
| 0.132      | 1         | 1122 | 32 | 0.0334122 |
| 0.0768871  | 1         | 658  | 19 | 0.0486044 |
| 0.110189   | 1         | 943  | 27 | 0.03501   |
| 0.0815611  | 1         | 698  | 20 | 0.0356103 |
| 0.0944595  | 1         | 803  | 16 | 0.0330238 |
| 0.0697565  | 1         | 593  | 13 | 0.0434491 |
| 0.116471   | 1         | 990  | 25 | 0.0173108 |
| 0.0817647  | 1         | 695  | 20 | 0.0492576 |
| 0.09       | 1         | 765  | 21 | 0.045806  |
| 0.0835256  | 1         | 724  | 21 | 0.034498  |
| 0.0677204  | 1         | 587  | 17 | 0.0329973 |
| 0.0702353  | 1         | 597  | 17 | 0.0431313 |
| 0.101647   | 1         | 864  | 24 | 0.0297046 |
| 0.117529   | 1         | 999  | 26 | 0.0347451 |
| 0.0676471  | 0.991379  | 580  | 10 | 0.0443142 |
| 0.0991096  | 1         | 846  | 23 | 0.0310817 |
| 0.0709412  | 1         | 603  | 17 | 0.0462916 |
| 0.0488235  | 1         | 415  | 12 | 0.0486926 |
| 0.072      | 1         | 612  | 17 | 0.0477393 |
| 0.0748235  | 1         | 636  | 18 | 0.0423457 |
| 0.114256   | 1         | 973  | 24 | 0.0123762 |
| 0.0686102  | 1         | 586  | 15 | 0.0464769 |
| 0.0781414  | 1         | 671  | 19 | 0.0296605 |
| 0.00692428 | 0.0748792 | 828  | 16 | 0.0131265 |
| 0.0974118  | 1         | 828  | 16 | 0.0131265 |
| 0.0691311  | 1         | 619  | 18 | 0.0473244 |
| 0.0728235  | 1         | 619  | 18 | 0.0473244 |
| 0.0744618  | 1         | 633  | 18 | 0.0347893 |
| 0.0727059  | 1         | 618  | 12 | 0.0430783 |
| 0.107406   | 1         | 918  | 26 | 0.024258  |
| 0.0610178  | 1         | 705  | 16 | 0.0070532 |
| 0.088      | 1         | 748  | 18 | 0.0400417 |
| 0.0757345  | 1         | 647  | 18 | 0.0458855 |
| 0.0912941  | 1         | 776  | 22 | 0.0126322 |
| 0.0743529  | 1         | 632  | 16 | 0.0490369 |
| 0.0300716  | 1         | 689  | 19 | 0.0420808 |
| 0.093607   | 1         | 798  | 22 | 0.0170195 |
| 0.0580068  | 1         | 635  | 18 | 0.0426634 |
| 0.136941   | 1         | 1164 | 30 | 0.0189792 |
| 0.0324252  | 1         | 632  | 18 | 0.0283187 |
| 0.0487005  | 1         | 416  | 12 | 0.0329443 |
| 0.0649412  | 1         | 552  | 13 | 0.0489222 |
| 0.112706   | 1         | 958  | 20 | 0.024876  |
| 0.0923945  | 1         | 786  | 18 | 0.0341184 |

|           |   |      |    |           |
|-----------|---|------|----|-----------|
| 0.108191  | 1 | 951  | 15 | 0.0151039 |
| 0.0695294 | 1 | 591  | 16 | 0.0443142 |
| 0.077483  | 1 | 660  | 13 | 0.046883  |
| 0.0721674 | 1 | 614  | 12 | 0.0120761 |
| 0.0456056 | 1 | 590  | 11 | 0.0450027 |
| 0.104118  | 1 | 885  | 23 | 0.0356897 |
| 0.138088  | 1 | 1183 | 31 | 0.0112816 |
| 0.0654534 | 1 | 820  | 21 | 0.0466182 |
| 0.0476533 | 1 | 597  | 17 | 0.0493724 |
| 0.0685479 | 1 | 583  | 12 | 0.0352925 |
| 0.0724024 | 1 | 616  | 10 | 0.0329708 |
| 0.0802164 | 1 | 682  | 16 | 0.021239  |
| 0.118157  | 1 | 1118 | 31 | 0.0168606 |
| 0.0681952 | 1 | 580  | 14 | 0.0357956 |
| 0.071017  | 1 | 604  | 17 | 0.0430872 |
| 0.0996358 | 1 | 848  | 14 | 0.031479  |
| 0.0639    | 1 | 639  | 11 | 0.0358309 |
| 0.0730588 | 1 | 621  | 18 | 0.0351777 |
| 0.130235  | 1 | 1107 | 31 | 0.0232517 |
| 0.0922353 | 1 | 784  | 23 | 0.0264561 |
| 0.119647  | 1 | 1017 | 27 | 0.0201797 |
| 0.0794118 | 1 | 675  | 19 | 0.0240197 |
| 0.0587068 | 1 | 503  | 14 | 0.0155541 |
| 0.0703134 | 1 | 599  | 17 | 0.0459561 |
| 0.123137  | 1 | 1049 | 29 | 0.0290955 |
| 0.0777087 | 1 | 662  | 18 | 0.0475009 |
| 0.0712941 | 1 | 606  | 17 | 0.0393002 |
| 0.0646678 | 1 | 550  | 15 | 0.0468389 |
| 0.0942046 | 1 | 803  | 20 | 0.0377024 |
| 0.112824  | 1 | 959  | 21 | 0.0492576 |
| 0.0710588 | 1 | 604  | 13 | 0.0459296 |
| 0.114588  | 1 | 974  | 21 | 0.0295193 |
| 0.0888587 | 1 | 784  | 22 | 0.0457707 |
| 0.0748045 | 1 | 660  | 18 | 0.0324676 |
| 0.0535294 | 1 | 455  | 13 | 0.016993  |
| 0.0531915 | 1 | 455  | 13 | 0.016993  |
| 0.111684  | 1 | 953  | 26 | 0.0170195 |
| 0.0306191 | 1 | 596  | 16 | 0.0402623 |
| 0.0701176 | 1 | 596  | 16 | 0.0402623 |
| 0.0850932 | 1 | 963  | 22 | 0.0432902 |
| 0.0709412 | 1 | 603  | 15 | 0.0487898 |
| 0.0695294 | 1 | 591  | 12 | 0.0475362 |
| 0.0750821 | 1 | 640  | 18 | 0.0336152 |
| 0.0755294 | 1 | 642  | 18 | 0.0335358 |
| 0.0750117 | 1 | 640  | 18 | 0.0361399 |
| 0.0685882 | 1 | 583  | 15 | 0.0451616 |
| 0.0821176 | 1 | 698  | 20 | 0.0491693 |

|            |          |      |    |           |
|------------|----------|------|----|-----------|
| 0.0781176  | 1        | 664  | 19 | 0.0483484 |
| 0.0704706  | 1        | 599  | 17 | 0.0372169 |
| 0.0442353  | 1        | 376  | 11 | 0.0466535 |
| 0.0809412  | 1        | 688  | 19 | 0.0351512 |
| 0.0648235  | 1        | 551  | 16 | 0.0242316 |
| 0.0550588  | 1        | 468  | 11 | 0.0431313 |
| 0.0872941  | 1        | 742  | 21 | 0.0359545 |
| 0.0758824  | 1        | 645  | 18 | 0.0430165 |
| 0.121882   | 1        | 1036 | 23 | 0.0424251 |
| 0.0781176  | 1        | 664  | 19 | 0.0439081 |
| 0.197294   | 1        | 1677 | 44 | 0.0241786 |
| 0.109529   | 1        | 931  | 27 | 0.0332003 |
| 0.0985481  | 1        | 862  | 22 | 0.0470772 |
| 0.105865   | 1        | 926  | 26 | 0.0283187 |
| 0.104      | 1        | 884  | 23 | 0.0324412 |
| 0.0751765  | 1        | 639  | 12 | 0.0440141 |
| 0.0843858  | 1        | 755  | 21 | 0.0317703 |
| 0.00917431 | 0.103311 | 755  | 21 | 0.0317703 |
| 0.0670827  | 1        | 602  | 17 | 0.0440582 |
| 0.0261812  | 1        | 645  | 17 | 0.0398475 |
| 0.0781232  | 1        | 671  | 19 | 0.0307904 |
| 0.0334511  | 1        | 606  | 17 | 0.0475186 |
| 0.0516854  | 1        | 874  | 18 | 0.0352925 |
| 0.0849412  | 1        | 722  | 16 | 0.0422927 |
| 0.0744942  | 1        | 637  | 18 | 0.0454618 |
| 0.111098   | 1        | 950  | 25 | 0.0481012 |
| 0.0721553  | 1        | 617  | 12 | 0.0464328 |
| 0.0742353  | 1        | 631  | 18 | 0.045806  |
| 0.0705882  | 1        | 600  | 12 | 0.0444289 |
| 0.0243874  | 0.35     | 600  | 12 | 0.0444289 |
| 0.111747   | 1        | 1016 | 24 | 0.0416395 |
| 0.0384143  | 0.669408 | 608  | 17 | 0.0336594 |
| 0.186588   | 1        | 1586 | 30 | 0.0230222 |
| 0.0357683  | 1        | 591  | 17 | 0.035672  |
| 0.0505961  | 1        | 836  | 24 | 0.0315143 |
| 0.065545   | 1        | 1083 | 26 | 0.013612  |
| 0.0593718  | 1        | 981  | 24 | 0.0244611 |
| 0.0704506  | 1        | 602  | 13 | 0.0407479 |
| 0.0857344  | 1        | 732  | 21 | 0.0478275 |
| 0.0549747  | 1        | 489  | 14 | 0.0473244 |
| 0.0809412  | 1        | 688  | 18 | 0.0422839 |
| 0.0654447  | 1        | 557  | 15 | 0.0407743 |
| 0.0730588  | 0.918639 | 676  | 12 | 0.02206   |
| 0.0747059  | 1        | 635  | 18 | 0.0463445 |
| 0.117294   | 1        | 997  | 20 | 0.0323617 |
| 0.0668739  | 1        | 1054 | 29 | 0.0470507 |
| 0.153059   | 1        | 1301 | 31 | 0.014742  |



|           |          |      |    |            |
|-----------|----------|------|----|------------|
| 0.0787587 | 1        | 670  | 19 | 0.0408803  |
| 0.134948  | 1        | 1148 | 30 | 0.0401476  |
| 0.057377  | 1        | 490  | 14 | 0.0447644  |
| 0.0824912 | 1        | 702  | 20 | 0.0498932  |
| 0.111919  | 1        | 954  | 23 | 0.0199767  |
| 0.0884552 | 1        | 970  | 27 | 0.0227574  |
| 0.0704655 | 1        | 601  | 16 | 0.0485249  |
| 0.0783529 | 1        | 666  | 19 | 0.0482248  |
| 0.0817647 | 1        | 695  | 20 | 0.0283275  |
| 0.0592755 | 1        | 1003 | 27 | 0.0346392  |
| 0.111917  | 1        | 1003 | 27 | 0.0346392  |
| 0.0975294 | 1        | 829  | 20 | 0.0291662  |
| 0.112235  | 1        | 954  | 27 | 0.0429018  |
| 0.0647397 | 1        | 551  | 15 | 0.0289631  |
| 0.0979127 | 1        | 971  | 27 | 0.0168517  |
| 0.0902491 | 1        | 895  | 25 | 0.0330944  |
| 0.13385   | 1        | 1140 | 30 | 0.0139298  |
| 0.0709412 | 1        | 603  | 12 | 0.0480306  |
| 0.115331  | 1        | 993  | 24 | 0.043811   |
| 0.0690862 | 1        | 592  | 15 | 0.038488   |
| 0.100222  | 1        | 858  | 24 | 0.0358133  |
| 0.116692  | 1        | 999  | 27 | 0.0306933  |
| 0.0749387 | 1        | 703  | 14 | 0.0247347  |
| 0.0826573 | 1        | 703  | 14 | 0.0247347  |
| 0.0742353 | 1        | 631  | 18 | 0.0491693  |
| 0.0714118 | 1        | 607  | 15 | 0.039256   |
| 0.0395294 | 0.553542 | 607  | 15 | 0.039256   |
| 0.109294  | 1        | 929  | 23 | 0.0125881  |
| 0.161484  | 1        | 1423 | 40 | 0.0170106  |
| 0.071772  | 1        | 612  | 15 | 0.0493547  |
| 0.0702353 | 1        | 597  | 12 | 0.0444907  |
| 0.0724706 | 1        | 616  | 17 | 0.0494783  |
| 0.0390488 | 1        | 624  | 18 | 0.0408803  |
| 0.0894142 | 1        | 1044 | 20 | 0.00655003 |
| 0.049332  | 1        | 576  | 16 | 0.0365901  |
| 0.0591725 | 1        | 748  | 20 | 0.0484631  |
| 0.0990588 | 1        | 842  | 18 | 0.0323352  |
| 0.0791765 | 1        | 673  | 19 | 0.0483131  |
| 0.0789535 | 1        | 673  | 19 | 0.0483131  |
| 0.0689534 | 1        | 591  | 16 | 0.0452676  |
| 0.0648789 | 1        | 600  | 17 | 0.0485426  |
| 0.0616125 | 1        | 525  | 11 | 0.0463887  |
| 0.109021  | 1        | 939  | 24 | 0.0102929  |
| 0.0914118 | 1        | 777  | 20 | 0.0242227  |
| 0.0711765 | 1        | 605  | 17 | 0.0388499  |
| 0.078     | 1        | 663  | 13 | 0.0478893  |
| 0.0721176 | 1        | 613  | 17 | 0.0379319  |

|           |   |      |    |            |
|-----------|---|------|----|------------|
| 0.0891443 | 1 | 822  | 23 | 0.0360163  |
| 0.133101  | 1 | 1144 | 32 | 0.0244699  |
| 0.119377  | 1 | 1019 | 29 | 0.0246994  |
| 0.116663  | 1 | 997  | 21 | 0.014892   |
| 0.0754118 | 1 | 641  | 15 | 0.0374376  |
| 0.0817979 | 1 | 697  | 19 | 0.0294222  |
| 0.0769412 | 1 | 654  | 19 | 0.0462121  |
| 0.147294  | 1 | 1252 | 32 | 0.0158101  |
| 0.0768235 | 1 | 653  | 17 | 0.0327854  |
| 0.0770588 | 1 | 655  | 18 | 0.0448174  |
| 0.0707403 | 1 | 602  | 13 | 0.0405537  |
| 0.0967098 | 1 | 823  | 16 | 0.0351777  |
| 0.0797489 | 1 | 686  | 16 | 0.0191734  |
| 0.0742353 | 1 | 631  | 16 | 0.039971   |
| 0.063909  | 1 | 944  | 26 | 0.0160749  |
| 0.109647  | 1 | 932  | 25 | 0.0354602  |
| 0.121647  | 1 | 1034 | 28 | 0.0235783  |
| 0.0708285 | 1 | 607  | 17 | 0.0453294  |
| 0.0813841 | 1 | 755  | 17 | 0.0435374  |
| 0.04      | 1 | 341  | 10 | 0.0463887  |
| 0.118118  | 1 | 1004 | 27 | 0.0482336  |
| 0.0723529 | 1 | 615  | 17 | 0.0473244  |
| 0.060648  | 1 | 526  | 15 | 0.0429283  |
| 0.0698824 | 1 | 594  | 12 | 0.0477922  |
| 0.0712941 | 1 | 606  | 17 | 0.0376847  |
| 0.0581042 | 1 | 670  | 15 | 0.0440405  |
| 0.0964801 | 1 | 836  | 23 | 0.0392119  |
| 0.0922054 | 1 | 860  | 23 | 0.0493371  |
| 0.0998375 | 1 | 860  | 23 | 0.0493371  |
| 0.0887796 | 1 | 758  | 22 | 0.0280627  |
| 0.104353  | 1 | 887  | 18 | 0.0313554  |
| 0.045658  | 1 | 704  | 20 | 0.0402447  |
| 0.205882  | 1 | 1750 | 47 | 0.0232429  |
| 0.0793301 | 1 | 791  | 17 | 0.0129853  |
| 0.0506713 | 1 | 668  | 19 | 0.0326972  |
| 0.0794118 | 1 | 675  | 17 | 0.0344538  |
| 0.0686746 | 1 | 643  | 16 | 0.038082   |
| 0.0917421 | 1 | 801  | 18 | 0.0247347  |
| 0.239391  | 1 | 2059 | 47 | 0.00444907 |
| 0.0742353 | 1 | 631  | 18 | 0.0448615  |
| 0.0787059 | 1 | 669  | 19 | 0.0467153  |
| 0.0692775 | 1 | 605  | 17 | 0.0432284  |
| 0.0351879 | 1 | 382  | 10 | 0.0483837  |
| 0.100037  | 1 | 1086 | 24 | 0.023287   |
| 0.0555453 | 1 | 603  | 13 | 0.0491693  |
| 0.0697647 | 1 | 593  | 11 | 0.0477922  |
| 0.0928981 | 1 | 794  | 21 | 0.0186437  |

|           |   |      |    |           |
|-----------|---|------|----|-----------|
| 0.124706  | 1 | 1060 | 29 | 0.0127734 |
| 0.0686413 | 1 | 584  | 17 | 0.0466005 |
| 0.0673354 | 1 | 584  | 17 | 0.0466005 |
| 0.0790588 | 1 | 672  | 19 | 0.0391589 |
| 0.0194288 | 1 | 551  | 16 | 0.0205417 |
| 0.0254584 | 1 | 722  | 17 | 0.0411186 |
| 0.0219323 | 1 | 622  | 18 | 0.0407302 |
| 0.0255994 | 1 | 726  | 20 | 0.0235254 |
| 0.0241537 | 1 | 685  | 14 | 0.0235254 |
| 0.0404795 | 1 | 1148 | 32 | 0.0286542 |
| 0.0946517 | 1 | 807  | 19 | 0.0355749 |
| 0.0690828 | 1 | 589  | 10 | 0.0457178 |
| 0.0496471 | 1 | 422  | 12 | 0.0408185 |
| 0.0805259 | 1 | 686  | 12 | 0.0159513 |
| 0.0690586 | 1 | 614  | 16 | 0.0267739 |
| 0.036112  | 1 | 707  | 20 | 0.0299871 |
| 0.144235  | 1 | 1226 | 31 | 0.0166664 |
| 0.0402612 | 1 | 598  | 14 | 0.0340654 |
| 0.042887  | 1 | 637  | 18 | 0.0486044 |
| 0.0747653 | 1 | 637  | 17 | 0.0225014 |
| 0.0848912 | 1 | 722  | 16 | 0.0354778 |
| 0.0912941 | 1 | 776  | 21 | 0.0349923 |
| 0.0675294 | 1 | 574  | 16 | 0.0396709 |
| 0.108353  | 1 | 921  | 26 | 0.0339242 |
| 0.104588  | 1 | 889  | 22 | 0.030605  |
| 0.0852911 | 1 | 737  | 15 | 0.0178228 |
| 0.088     | 1 | 748  | 21 | 0.041816  |
| 0.0911861 | 1 | 778  | 21 | 0.0399004 |
| 0.0705882 | 1 | 600  | 16 | 0.0444466 |
| 0.113818  | 1 | 1042 | 29 | 0.0148832 |
| 0.0862353 | 1 | 733  | 21 | 0.032706  |
| 0.110446  | 1 | 941  | 25 | 0.01423   |
| 0.0795294 | 1 | 676  | 15 | 0.042275  |
| 0.11947   | 1 | 1064 | 26 | 0.0215215 |
| 0.0694118 | 1 | 590  | 15 | 0.0323882 |
| 0.0522605 | 1 | 593  | 14 | 0.0463445 |
| 0.129169  | 1 | 1100 | 31 | 0.0174608 |
| 0.0351948 | 1 | 588  | 11 | 0.0368373 |
| 0.0398374 | 1 | 588  | 11 | 0.0368373 |
| 0.0764376 | 1 | 763  | 19 | 0.0462121 |
| 0.0889601 | 1 | 888  | 24 | 0.0281686 |
| 0.0830588 | 1 | 706  | 18 | 0.0212479 |
| 0.0808129 | 1 | 855  | 22 | 0.0383379 |
| 0.123529  | 1 | 1050 | 24 | 0.0471567 |
| 0.132471  | 1 | 1126 | 27 | 0.0237372 |
| 0.0701176 | 1 | 596  | 17 | 0.0227838 |
| 0.0817647 | 1 | 695  | 20 | 0.0290779 |

|            |          |      |    |            |
|------------|----------|------|----|------------|
| 0.0798944  | 1        | 908  | 21 | 0.0138857  |
| 0.136941   | 1        | 1164 | 28 | 0.0315761  |
| 0.0557144  | 1        | 799  | 18 | 0.0480394  |
| 0.0512941  | 1        | 436  | 12 | 0.0434314  |
| 0.0443529  | 1        | 377  | 11 | 0.0433343  |
| 0.0770588  | 1        | 655  | 19 | 0.0349305  |
| 0.124353   | 0.946285 | 1117 | 31 | 0.0284688  |
| 0.0702353  | 1        | 597  | 17 | 0.0444731  |
| 0.202564   | 1        | 1722 | 49 | 0.0464416  |
| 0.084343   | 1        | 717  | 19 | 0.0470684  |
| 0.0981199  | 1        | 835  | 23 | 0.0359545  |
| 0.108382   | 1        | 931  | 26 | 0.0171077  |
| 0.072316   | 1        | 617  | 15 | 0.0461238  |
| 0.100588   | 1        | 855  | 21 | 0.0263766  |
| 0.00827662 | 0.14265  | 1381 | 35 | 0.00903056 |
| 0.124162   | 1        | 1056 | 22 | 0.0201444  |
| 0.130746   | 1        | 1149 | 23 | 0.0198973  |
| 0.114019   | 1        | 1002 | 27 | 0.0175844  |
| 0.0487354  | 1        | 1160 | 32 | 0.0351159  |
| 0.0968757  | 1        | 831  | 20 | 0.0233047  |
| 0.10457    | 1        | 897  | 25 | 0.0241345  |
| 0.0845374  | 1        | 901  | 24 | 0.0225543  |
| 0.0677647  | 1        | 576  | 10 | 0.044579   |
| 0.0937647  | 1        | 797  | 22 | 0.0339242  |
| 0.054      | 0.765    | 600  | 17 | 0.0452764  |
| 0.100706   | 1        | 856  | 20 | 0.0434756  |
| 0.0538824  | 1        | 458  | 13 | 0.0476863  |
| 0.0609105  | 1        | 685  | 16 | 0.045859   |
| 0.109867   | 1        | 1089 | 30 | 0.0485161  |
| 0.0531765  | 0.47983  | 942  | 26 | 0.0244876  |
| 0.0523268  | 1        | 741  | 19 | 0.0350012  |
| 0.0848689  | 1        | 806  | 23 | 0.0322381  |
| 0.0534118  | 1        | 454  | 12 | 0.0419396  |
| 0.0742353  | 1        | 631  | 14 | 0.0419043  |
| 0.0458514  | 1        | 688  | 15 | 0.0402888  |
| 0.0822353  | 1        | 699  | 20 | 0.0323087  |
| 0.104368   | 1        | 896  | 25 | 0.0160661  |
| 0.0751765  | 1        | 639  | 11 | 0.0319645  |
| 0.0794118  | 1        | 675  | 19 | 0.0294222  |
| 0.0948235  | 1        | 806  | 23 | 0.0463269  |
| 0.145882   | 1        | 1240 | 32 | 0.0242139  |
| 0.0683521  | 1        | 584  | 15 | 0.0383644  |
| 0.0708235  | 1        | 602  | 17 | 0.0494606  |
| 0.076      | 0.995377 | 649  | 18 | 0.0238785  |
| 0.0882353  | 1        | 750  | 16 | 0.0178669  |
| 0.0988235  | 1        | 840  | 24 | 0.0328825  |
| 0.0691765  | 1        | 588  | 16 | 0.044888   |

|           |          |      |    |           |
|-----------|----------|------|----|-----------|
| 0.055556  | 1        | 697  | 20 | 0.0345774 |
| 0.0681109 | 1        | 720  | 20 | 0.0386999 |
| 0.131913  | 1        | 1152 | 32 | 0.0240638 |
| 0.0558484 | 1        | 678  | 18 | 0.0419396 |
| 0.0940141 | 1        | 801  | 21 | 0.0446496 |
| 0.0891765 | 1        | 758  | 22 | 0.0183789 |
| 0.069373  | 1        | 593  | 17 | 0.0499108 |
| 0.0700749 | 1        | 599  | 17 | 0.0477569 |
| 0.0604706 | 1        | 514  | 14 | 0.0440582 |
| 0.0437056 | 1        | 677  | 19 | 0.0127116 |
| 0.112493  | 1        | 1067 | 26 | 0.023852  |
| 0.0709412 | 1        | 603  | 14 | 0.0411716 |
| 0.131437  | 1        | 1118 | 30 | 0.0164898 |
| 0.0729324 | 1        | 627  | 12 | 0.0336947 |
| 0.139767  | 1        | 1189 | 33 | 0.0161455 |
| 0.074762  | 1        | 636  | 18 | 0.0388853 |
| 0.0505593 | 1        | 678  | 15 | 0.0486573 |
| 0.0791779 | 1        | 678  | 15 | 0.0486573 |
| 0.104588  | 0.973713 | 913  | 50 | 0.0152893 |
| 0.0977825 | 1        | 1464 | 59 | 0.0460002 |
| 0.0904706 | 0.996114 | 772  | 15 | 0.0188733 |
| 0.0608235 | 1        | 517  | 10 | 0.0376582 |
| 0.0750713 | 1        | 658  | 18 | 0.0281686 |
| 0.0704882 | 1        | 605  | 14 | 0.047342  |
| 0.0678824 | 1        | 577  | 14 | 0.0463357 |
| 0.0824706 | 1        | 701  | 17 | 0.0169047 |
| 0.0747059 | 1        | 635  | 14 | 0.0382232 |
| 0.0711765 | 1        | 605  | 14 | 0.0497078 |
| 0.0711012 | 1        | 605  | 14 | 0.0497078 |
| 0.0781176 | 1        | 664  | 19 | 0.0446232 |
| 0.0833921 | 1        | 709  | 20 | 0.0477304 |
| 0.0848235 | 1        | 721  | 17 | 0.0473685 |
| 0.0830588 | 1        | 706  | 20 | 0.0328561 |
| 0.118353  | 1        | 1006 | 20 | 0.0219276 |
| 0.0705882 | 1        | 600  | 17 | 0.0404036 |
| 0.0791765 | 1        | 673  | 18 | 0.0405537 |
| 0.0495015 | 1        | 422  | 12 | 0.0196148 |
| 0.0802353 | 1        | 682  | 18 | 0.0371197 |
| 0.0818379 | 1        | 716  | 19 | 0.01694   |
| 0.0656471 | 1        | 558  | 13 | 0.0477569 |
| 0.0968235 | 1        | 823  | 23 | 0.0333945 |
| 0.109928  | 1        | 950  | 26 | 0.0161455 |
| 0.0834877 | 1        | 721  | 21 | 0.0408803 |
| 0.07      | 1        | 595  | 14 | 0.046936  |
| 0.087115  | 1        | 741  | 19 | 0.0315231 |
| 0.117025  | 1        | 996  | 27 | 0.049902  |
| 0.0898126 | 1        | 767  | 22 | 0.0488162 |

|           |         |      |    |            |
|-----------|---------|------|----|------------|
| 0.0721176 | 1       | 613  | 12 | 0.0440582  |
| 0.0736311 | 1       | 628  | 18 | 0.0480835  |
| 0.0829439 | 1       | 710  | 18 | 0.0446585  |
| 0.10645   | 1       | 911  | 26 | 0.00996628 |
| 0.0704694 | 1       | 614  | 17 | 0.021292   |
| 0.120706  | 1       | 1026 | 24 | 0.0243463  |
| 0.0494705 | 1       | 612  | 17 | 0.0244611  |
| 0.0576348 | 1       | 713  | 20 | 0.0473332  |
| 0.0704385 | 1       | 808  | 23 | 0.0385057  |
| 0.0835877 | 1       | 712  | 20 | 0.0347716  |
| 0.0518064 | 1       | 879  | 25 | 0.0351424  |
| 0.0544542 | 1       | 879  | 25 | 0.0351424  |
| 0.0719083 | 1       | 621  | 18 | 0.0332003  |
| 0.0603529 | 1       | 513  | 14 | 0.0482778  |
| 0.0716471 | 1       | 609  | 16 | 0.0481188  |
| 0.0702353 | 1       | 597  | 13 | 0.0220512  |
| 0.0918913 | 1       | 808  | 19 | 0.0435462  |
| 0.0684635 | 1       | 602  | 17 | 0.0471478  |
| 0.0755294 | 1       | 642  | 18 | 0.0408097  |
| 0.192941  | 1       | 1640 | 45 | 0.0105401  |
| 0.124941  | 1       | 1062 | 27 | 0.0119083  |
| 0.116353  | 1       | 989  | 27 | 0.0295193  |
| 0.0762841 | 1       | 652  | 14 | 0.0273035  |
| 0.0962054 | 1       | 1004 | 28 | 0.0120231  |
| 0.0391443 | 1       | 344  | 10 | 0.0489663  |
| 0.12932   | 1       | 1100 | 31 | 0.0164986  |
| 0.096285  | 1       | 819  | 22 | 0.0487898  |
| 0.0834118 | 1       | 709  | 20 | 0.0328296  |
| 0.0765882 | 1       | 651  | 12 | 0.0297046  |
| 0.219186  | 1       | 2294 | 63 | 0.00451087 |
| 0.072     | 1       | 612  | 12 | 0.0334916  |
| 0.0528235 | 1       | 449  | 13 | 0.0485426  |
| 0.0578786 | 1       | 717  | 20 | 0.0276919  |
| 0.0831497 | 1       | 717  | 20 | 0.0276919  |
| 0.0727804 | 0.73956 | 910  | 25 | 0.0227132  |
| 0.081935  | 1       | 708  | 20 | 0.0499726  |
| 0.0708567 | 1       | 708  | 20 | 0.0499726  |
| 0.0721176 | 1       | 613  | 13 | 0.0212037  |
| 0.112389  | 1       | 958  | 27 | 0.0333592  |
| 0.0829669 | 1       | 717  | 20 | 0.016534   |
| 0.106043  | 1       | 995  | 21 | 0.0254145  |
| 0.100075  | 1       | 939  | 25 | 0.0242934  |
| 0.0749824 | 1       | 639  | 18 | 0.0481983  |
| 0.0687041 | 1       | 589  | 10 | 0.0444907  |
| 0.119415  | 1       | 1021 | 21 | 0.0187762  |
| 0.0832941 | 1       | 708  | 19 | 0.00839498 |
| 0.0611765 | 1       | 520  | 15 | 0.047704   |

|           |         |      |    |            |
|-----------|---------|------|----|------------|
| 0.0745882 | 1       | 634  | 18 | 0.0402623  |
| 0.0995294 | 1       | 846  | 24 | 0.0233929  |
| 0.0835294 | 1       | 710  | 16 | 0.0466711  |
| 0.121412  | 1       | 1032 | 29 | 0.0209742  |
| 0.0691765 | 1       | 588  | 14 | 0.0494077  |
| 0.0846443 | 1       | 721  | 16 | 0.0203828  |
| 0.0695734 | 1       | 592  | 16 | 0.0469801  |
| 0.0678261 | 1       | 585  | 10 | 0.0400593  |
| 0.0737782 | 1       | 628  | 18 | 0.0452411  |
| 0.0738824 | 1       | 628  | 18 | 0.0410039  |
| 0.0544674 | 1       | 698  | 19 | 0.0382055  |
| 0.0825175 | 1       | 708  | 20 | 0.0463798  |
| 0.0698824 | 1       | 594  | 17 | 0.045806   |
| 0.10446   | 1       | 904  | 21 | 0.0403153  |
| 0.0911765 | 1       | 775  | 19 | 0.0295281  |
| 0.121176  | 1       | 1030 | 27 | 0.0224219  |
| 0.0835294 | 1       | 710  | 20 | 0.0242845  |
| 0.102235  | 1       | 869  | 25 | 0.0159778  |
| 0.0958824 | 1       | 815  | 22 | 0.035928   |
| 0.0730502 | 1       | 621  | 18 | 0.0285835  |
| 0.0694999 | 1       | 592  | 15 | 0.0493282  |
| 0.0850939 | 1       | 725  | 18 | 0.0497255  |
| 0.0774118 | 1       | 658  | 18 | 0.0411628  |
| 0.0923869 | 1       | 790  | 22 | 0.0284688  |
| 0.11332   | 1       | 969  | 28 | 0.0253527  |
| 0.0918824 | 1       | 781  | 22 | 0.0317173  |
| 0.0401699 | 1       | 350  | 10 | 0.0482336  |
| 0.0957647 | 1       | 814  | 20 | 0.0466711  |
| 0.0850588 | 1       | 723  | 15 | 0.0166046  |
| 0.0694118 | 1       | 590  | 15 | 0.0402623  |
| 0.0908235 | 1       | 772  | 21 | 0.0350012  |
| 0.0705202 | 1       | 610  | 17 | 0.0432019  |
| 0.0636609 | 1       | 754  | 17 | 0.041613   |
| 0.0684735 | 1       | 811  | 18 | 0.0306404  |
| 0.104564  | 1       | 1141 | 26 | 0.0121114  |
| 0.138669  | 1       | 1206 | 31 | 0.00900408 |
| 0.084     | 1       | 714  | 20 | 0.0196148  |
| 0.109412  | 1       | 930  | 23 | 0.0332974  |
| 0.0728235 | 1       | 619  | 17 | 0.0473155  |
| 0.117619  | 1       | 1000 | 24 | 0.0354867  |
| 0.118588  | 1       | 1008 | 28 | 0.0228015  |
| 0.103516  | 1       | 945  | 26 | 0.0223336  |
| 0.0652865 | 1       | 596  | 17 | 0.0460797  |
| 0.0897141 | 1       | 819  | 22 | 0.0338359  |
| 0.0744706 | 0.99061 | 639  | 18 | 0.00667361 |
| 0.0428632 | 1       | 712  | 19 | 0.0143094  |
| 0.0598824 | 1       | 509  | 14 | 0.0449586  |

|           |          |      |    |           |
|-----------|----------|------|----|-----------|
| 0.0725882 | 1        | 617  | 18 | 0.0456471 |
| 0.07      | 1        | 595  | 17 | 0.0487721 |
| 0.0727209 | 1        | 619  | 18 | 0.0440141 |
| 0.10152   | 1        | 868  | 25 | 0.029122  |
| 0.0683382 | 1        | 586  | 16 | 0.0411804 |
| 0.0794447 | 1        | 681  | 17 | 0.0279215 |
| 0.111111  | 1        | 946  | 26 | 0.0359457 |
| 0.0163529 | 0.199426 | 697  | 17 | 0.0375082 |
| 0.0811087 | 1        | 714  | 21 | 0.0460179 |
| 0.111551  | 1        | 958  | 27 | 0.0182377 |
| 0.0717647 | 1        | 610  | 16 | 0.0482866 |
| 0.0934525 | 1        | 795  | 20 | 0.0149627 |
| 0.0768147 | 1        | 654  | 19 | 0.0403506 |
| 0.0407059 | 1        | 346  | 10 | 0.0478982 |
| 0.127059  | 1        | 1080 | 25 | 0.0152098 |
| 0.114729  | 1        | 976  | 21 | 0.035725  |
| 0.0965882 | 1        | 821  | 16 | 0.0257764 |
| 0.0712941 | 1        | 606  | 14 | 0.0461062 |
| 0.071269  | 1        | 606  | 14 | 0.0461062 |
| 0.0734483 | 1        | 626  | 17 | 0.0477304 |
| 0.0663178 | 1        | 583  | 15 | 0.0462827 |
| 0.110471  | 1        | 939  | 24 | 0.023287  |
| 0.0650962 | 1        | 619  | 18 | 0.0475362 |
| 0.0803299 | 1        | 711  | 20 | 0.0450557 |
| 0.0709393 | 1        | 611  | 17 | 0.048931  |
| 0.07      | 1        | 595  | 13 | 0.048984  |
| 0.0498767 | 1        | 607  | 17 | 0.0444025 |
| 0.113529  | 1        | 965  | 27 | 0.0325383 |
| 0.109529  | 1        | 931  | 23 | 0.0322911 |
| 0.111647  | 1        | 949  | 22 | 0.022263  |
| 0.0698275 | 1        | 595  | 17 | 0.0386557 |
| 0.0746181 | 1        | 635  | 18 | 0.030402  |
| 0.0677154 | 1        | 1003 | 28 | 0.022369  |
| 0.0461113 | 1        | 683  | 20 | 0.0373757 |
| 0.0704159 | 1        | 1043 | 27 | 0.0170636 |
| 0.0519849 | 1        | 770  | 22 | 0.0325471 |
| 0.0428273 | 1        | 635  | 15 | 0.0321852 |
| 0.0716471 | 1        | 609  | 16 | 0.0435992 |
| 0.070892  | 1        | 604  | 13 | 0.0257587 |
| 0.0895294 | 1        | 761  | 20 | 0.0357691 |
| 0.0536983 | 1        | 461  | 11 | 0.0242934 |
| 0.0857309 | 1        | 736  | 21 | 0.0387705 |
| 0.0680172 | 1        | 601  | 12 | 0.0340301 |
| 0.0856471 | 1        | 728  | 21 | 0.0335534 |
| 0.0856471 | 1        | 728  | 21 | 0.0335534 |
| 0.0710588 | 1        | 604  | 13 | 0.0392207 |
| 0.102941  | 1        | 875  | 18 | 0.0348864 |



|           |          |      |    |           |
|-----------|----------|------|----|-----------|
| 0.110824  | 1        | 942  | 19 | 0.0329796 |
| 0.0756437 | 1        | 755  | 21 | 0.0122879 |
| 0.0714118 | 1        | 607  | 17 | 0.0349129 |
| 0.138588  | 1        | 1178 | 31 | 0.017046  |
| 0.0385655 | 0.435013 | 754  | 20 | 0.0349923 |
| 0.0507915 | 1        | 754  | 20 | 0.0349923 |
| 0.112062  | 1        | 956  | 21 | 0.0462651 |
| 0.0677758 | 1        | 607  | 17 | 0.047854  |
| 0.0752941 | 1        | 640  | 18 | 0.0430077 |
| 0.103517  | 1        | 886  | 20 | 0.0214332 |
| 0.0632157 | 1        | 541  | 15 | 0.024258  |
| 0.0667443 | 1        | 573  | 15 | 0.0360958 |
| 0.0817647 | 1        | 695  | 19 | 0.0360163 |
| 0.0515294 | 1        | 438  | 10 | 0.0463798 |
| 0.144608  | 1        | 1251 | 35 | 0.0268533 |
| 0.0612888 | 1        | 525  | 14 | 0.0270475 |
| 0.0989481 | 1        | 856  | 21 | 0.0340389 |
| 0.0733131 | 1        | 628  | 17 | 0.0410127 |
| 0.0986827 | 1        | 839  | 21 | 0.0327854 |
| 0.0617647 | 1        | 525  | 14 | 0.0220953 |
| 0.0702353 | 1        | 597  | 17 | 0.040792  |
| 0.0839596 | 1        | 715  | 17 | 0.0406684 |
| 0.115899  | 1        | 987  | 25 | 0.0153687 |
| 0.0511139 | 1        | 686  | 16 | 0.038744  |
| 0.062354  | 1        | 614  | 18 | 0.0398651 |
| 0.105479  | 1        | 899  | 25 | 0.0103812 |
| 0.0782099 | 1        | 921  | 24 | 0.0377642 |
| 0.0723493 | 1        | 623  | 18 | 0.0350012 |
| 0.0731307 | 1        | 623  | 18 | 0.0350012 |
| 0.0756225 | 1        | 653  | 16 | 0.0408626 |
| 0.0871117 | 1        | 976  | 26 | 0.021751  |
| 0.0814305 | 1        | 888  | 19 | 0.0246994 |
| 0.0730819 | 1        | 622  | 17 | 0.0475627 |
| 0.0729412 | 1        | 620  | 18 | 0.0437139 |
| 0.0487119 | 1        | 416  | 11 | 0.0333945 |
| 0.0992974 | 1        | 848  | 24 | 0.048675  |
| 0.0610329 | 1        | 520  | 14 | 0.0358486 |
| 0.0764706 | 1        | 650  | 12 | 0.011158  |
| 0.130389  | 1        | 1110 | 29 | 0.0328472 |
| 0.0722353 | 1        | 614  | 13 | 0.0408273 |
| 0.0493982 | 1        | 669  | 15 | 0.0467947 |
| 0.0715294 | 1        | 608  | 17 | 0.0489398 |
| 0.0735294 | 1        | 625  | 18 | 0.0467418 |
| 0.0722634 | 1        | 1014 | 28 | 0.0132589 |
| 0.0690736 | 1        | 595  | 15 | 0.0468035 |
| 0.0711765 | 1        | 605  | 10 | 0.0291838 |
| 0.071625  | 1        | 625  | 14 | 0.0496107 |

|           |          |      |    |            |
|-----------|----------|------|----|------------|
| 0.0701176 | 1        | 596  | 14 | 0.0418248  |
| 0.120781  | 1        | 1027 | 24 | 0.0498402  |
| 0.102471  | 1        | 871  | 19 | 0.0352925  |
| 0.0748744 | 1        | 641  | 15 | 0.0396533  |
| 0.0951712 | 1        | 881  | 24 | 0.0465387  |
| 0.0734828 | 1        | 626  | 11 | 0.0489663  |
| 0.0354118 | 0.505034 | 596  | 17 | 0.0460002  |
| 0.113327  | 1        | 966  | 25 | 0.024567   |
| 0.0698824 | 1        | 594  | 17 | 0.0497961  |
| 0.0536889 | 1        | 612  | 17 | 0.0408803  |
| 0.0615843 | 1        | 702  | 19 | 0.0350983  |
| 0.0694999 | 1        | 592  | 10 | 0.0315672  |
| 0.0232627 | 0.665541 | 592  | 10 | 0.0315672  |
| 0.0756471 | 1        | 643  | 18 | 0.0418866  |
| 0.113882  | 1        | 968  | 27 | 0.0122261  |
| 0.0745882 | 1        | 634  | 14 | 0.0325559  |
| 0.108197  | 1        | 920  | 23 | 0.0194735  |
| 0.07      | 1        | 595  | 17 | 0.0478364  |
| 0.0829412 | 1        | 705  | 15 | 0.0221836  |
| 0.0728235 | 1        | 619  | 16 | 0.0428223  |
| 0.101651  | 1        | 868  | 21 | 0.0219364  |
| 0.0267837 | 1        | 592  | 17 | 0.0432107  |
| 0.0483645 | 1        | 1069 | 26 | 0.0206123  |
| 0.0277338 | 1        | 613  | 17 | 0.0462033  |
| 0.0523358 | 1        | 596  | 17 | 0.0285924  |
| 0.059851  | 1        | 514  | 15 | 0.0474391  |
| 0.0766185 | 1        | 658  | 19 | 0.0475716  |
| 0.0546458 | 1        | 891  | 24 | 0.0239226  |
| 0.116235  | 1        | 988  | 25 | 0.0101781  |
| 0.137882  | 1        | 1172 | 33 | 0.00986035 |
| 0.0888235 | 1        | 755  | 20 | 0.032141   |
| 0.036403  | 1        | 606  | 17 | 0.0453735  |
| 0.0932941 | 1        | 793  | 22 | 0.0246023  |
| 0.0978824 | 1        | 832  | 19 | 0.0359545  |
| 0.0460781 | 1        | 393  | 11 | 0.0487721  |
| 0.071862  | 1        | 675  | 19 | 0.0294222  |
| 0.107882  | 1        | 917  | 22 | 0.0224219  |
| 0.11599   | 1        | 988  | 27 | 0.0289455  |
| 0.0762353 | 1        | 648  | 19 | 0.0491605  |
| 0.0657647 | 1        | 559  | 14 | 0.0457443  |
| 0.0702353 | 1        | 597  | 17 | 0.0381967  |
| 0.046081  | 1        | 438  | 12 | 0.0462562  |
| 0.087566  | 1        | 1012 | 26 | 0.0187144  |
| 0.110353  | 1        | 938  | 23 | 0.0491252  |
| 0.100471  | 1        | 854  | 23 | 0.049443   |
| 0.110328  | 1        | 939  | 21 | 0.0156424  |
| 0.117371  | 1        | 1000 | 26 | 0.0150774  |

|           |          |      |    |           |
|-----------|----------|------|----|-----------|
| 0.114588  | 1        | 974  | 28 | 0.0213096 |
| 0.112329  | 1        | 963  | 21 | 0.0479335 |
| 0.136268  | 1        | 1164 | 31 | 0.0144065 |
| 0.0688235 | 1        | 585  | 16 | 0.0490104 |
| 0.114413  | 1        | 978  | 23 | 0.0358045 |
| 0.106353  | 1        | 904  | 24 | 0.0218481 |
| 0.133765  | 1        | 1137 | 25 | 0.0208859 |
| 0.0937055 | 1        | 856  | 25 | 0.0300136 |
| 0.119849  | 1        | 1050 | 27 | 0.0164104 |
| 0.126118  | 1        | 1086 | 31 | 0.0171077 |
| 0.0836471 | 1        | 711  | 14 | 0.0424428 |
| 0.129176  | 1        | 1098 | 31 | 0.0111757 |
| 0.0522788 | 1        | 1131 | 29 | 0.015766  |
| 0.0724178 | 1        | 617  | 13 | 0.0439081 |
| 0.0830588 | 1        | 706  | 18 | 0.0438816 |
| 0.143243  | 1        | 1220 | 34 | 0.0344715 |
| 0.0393027 | 1        | 611  | 16 | 0.0497255 |
| 0.0382092 | 0.99     | 600  | 11 | 0.0488957 |
| 0.0701176 | 1        | 596  | 13 | 0.0286806 |
| 0.077122  | 1        | 656  | 19 | 0.0389029 |
| 0.0701176 | 1        | 596  | 15 | 0.0472361 |
| 0.0691765 | 1        | 588  | 16 | 0.0461238 |
| 0.0755404 | 1        | 643  | 18 | 0.0460444 |
| 0.0704126 | 1        | 599  | 17 | 0.0479158 |
| 0.119647  | 1        | 1017 | 24 | 0.0260942 |
| 0.0694656 | 1        | 594  | 12 | 0.0428488 |
| 0.0683529 | 1        | 581  | 10 | 0.0461415 |
| 0.0470385 | 1        | 625  | 18 | 0.045806  |
| 0.200118  | 1        | 1701 | 44 | 0.0111933 |
| 0.0685882 | 1        | 583  | 16 | 0.031479  |
| 0.0488785 | 1        | 584  | 17 | 0.0323882 |
| 0.0685527 | 1        | 584  | 17 | 0.0323882 |
| 0.0696731 | 1        | 601  | 14 | 0.048216  |
| 0.0680009 | 1        | 615  | 17 | 0.0473155 |
| 0.100941  | 1        | 858  | 24 | 0.0106019 |
| 0.0768791 | 1        | 673  | 14 | 0.0491075 |
| 0.123529  | 1        | 1050 | 22 | 0.0235254 |
| 0.0796471 | 1        | 677  | 19 | 0.0460179 |
| 0.112689  | 1        | 960  | 26 | 0.0242934 |
| 0.112037  | 1        | 955  | 27 | 0.0244081 |
| 0.0947059 | 1        | 805  | 22 | 0.0420455 |
| 0.0882092 | 1        | 796  | 22 | 0.0168871 |
| 0.0932412 | 1        | 796  | 22 | 0.0168871 |
| 0.0686114 | 1        | 588  | 12 | 0.0414011 |
| 0.0444352 | 1        | 749  | 19 | 0.0461062 |
| 0.0664003 | 1        | 565  | 16 | 0.0359545 |
| 0.0349136 | 0.526408 | 568  | 14 | 0.0478364 |

|           |          |      |    |            |
|-----------|----------|------|----|------------|
| 0.0786957 | 1        | 683  | 15 | 0.0399004  |
| 0.0411762 | 1        | 850  | 21 | 0.0423457  |
| 0.0364611 | 1        | 619  | 17 | 0.0459738  |
| 0.0636586 | 1        | 546  | 12 | 0.0486573  |
| 0.0881427 | 1        | 756  | 15 | 0.0424428  |
| 0.0849289 | 1        | 723  | 20 | 0.0353454  |
| 0.0819922 | 1        | 698  | 18 | 0.0360781  |
| 0.102432  | 1        | 872  | 25 | 0.0331032  |
| 0.0860127 | 1        | 733  | 14 | 0.0223601  |
| 0.0882353 | 1        | 750  | 15 | 0.0248936  |
| 0.0869057 | 1        | 744  | 21 | 0.0426634  |
| 0.0717842 | 1        | 620  | 18 | 0.049187   |
| 0.0883251 | 1        | 752  | 21 | 0.0333328  |
| 0.0683529 | 1        | 581  | 10 | 0.0341449  |
| 0.104824  | 1        | 891  | 20 | 0.0223248  |
| 0.078     | 1        | 663  | 19 | 0.0346922  |
| 0.105067  | 1        | 902  | 25 | 0.0494783  |
| 0.068538  | 1        | 586  | 13 | 0.0482778  |
| 0.0849944 | 0.69697  | 1089 | 29 | 0.0232429  |
| 0.0763529 | 1        | 649  | 16 | 0.0459649  |
| 0.0724348 | 1        | 617  | 16 | 0.0446232  |
| 0.0736471 | 1        | 626  | 11 | 0.0284335  |
| 0.0897993 | 1        | 765  | 22 | 0.0336329  |
| 0.0720638 | 1        | 624  | 18 | 0.0318762  |
| 0.097027  | 1        | 842  | 17 | 0.0103282  |
| 0.0990588 | 1        | 842  | 17 | 0.0103282  |
| 0.0918414 | 1        | 797  | 22 | 0.0251849  |
| 0.142437  | 1        | 1211 | 30 | 0.00866863 |
| 0.0841023 | 1        | 720  | 20 | 0.0465476  |
| 0.0682582 | 1        | 589  | 17 | 0.0497166  |
| 0.0728235 | 1        | 619  | 15 | 0.0489045  |
| 0.0862367 | 1        | 1146 | 31 | 0.0352042  |
| 0.0779827 | 1        | 668  | 19 | 0.0434756  |
| 0.0701858 | 1        | 597  | 17 | 0.0488251  |
| 0.0749412 | 1        | 637  | 13 | 0.0499638  |
| 0.084     | 1        | 714  | 16 | 0.0155806  |
| 0.0828355 | 1        | 721  | 20 | 0.0445967  |
| 0.109884  | 1        | 1015 | 26 | 0.0321675  |
| 0.0704706 | 1        | 599  | 17 | 0.0466182  |
| 0.105176  | 1        | 894  | 25 | 0.0475362  |
| 0.0864706 | 1        | 735  | 20 | 0.0169312  |
| 0.072953  | 1        | 752  | 21 | 0.0340566  |
| 0.0812941 | 1        | 691  | 16 | 0.0232429  |
| 0.0767059 | 1        | 652  | 17 | 0.0462827  |
| 0.121722  | 1        | 1049 | 29 | 0.01694    |
| 0.0814118 | 0.659676 | 1049 | 29 | 0.01694    |
| 0.0714118 | 1        | 607  | 18 | 0.0232076  |

|           |          |      |    |           |
|-----------|----------|------|----|-----------|
| 0.0768235 | 1        | 653  | 17 | 0.0396356 |
| 0.0697297 | 1        | 645  | 18 | 0.042125  |
| 0.066651  | 1        | 568  | 16 | 0.0444466 |
| 0.103838  | 1        | 901  | 23 | 0.0431048 |
| 0.0770948 | 1        | 656  | 16 | 0.0475362 |
| 0.0602579 | 1        | 514  | 15 | 0.0473332 |
| 0.0830588 | 1        | 706  | 18 | 0.0320086 |
| 0.0879262 | 1        | 820  | 22 | 0.0283628 |
| 0.0964706 | 1        | 820  | 22 | 0.0283628 |
| 0.137412  | 1        | 1168 | 27 | 0.0119525 |
| 0.0337171 | 1        | 694  | 20 | 0.0488251 |
| 0.0757647 | 1        | 644  | 14 | 0.0317085 |
| 0.0744706 | 1        | 633  | 12 | 0.0292368 |
| 0.0375595 | 1        | 631  | 17 | 0.0370491 |
| 0.0702353 | 1        | 597  | 17 | 0.0483484 |
| 0.163529  | 1        | 1390 | 39 | 0.0322205 |
| 0.0965804 | 1        | 836  | 24 | 0.0315672 |
| 0.0888784 | 1        | 756  | 21 | 0.0361399 |
| 0.0698824 | 1        | 594  | 11 | 0.042381  |
| 0.0712941 | 1        | 606  | 11 | 0.0480924 |
| 0.102471  | 1        | 871  | 25 | 0.0243022 |
| 0.0696598 | 1        | 602  | 14 | 0.0445349 |
| 0.114706  | 1        | 975  | 26 | 0.0339065 |
| 0.0715294 | 1        | 608  | 17 | 0.0464416 |
| 0.0750588 | 1        | 638  | 18 | 0.0322911 |
| 0.0971765 | 1        | 826  | 23 | 0.0245052 |
| 0.0706598 | 1        | 604  | 17 | 0.0237902 |
| 0.0505381 | 1        | 432  | 10 | 0.0499903 |
| 0.072561  | 1        | 627  | 17 | 0.0432725 |
| 0.0851765 | 1        | 724  | 19 | 0.035416  |
| 0.0801177 | 1        | 681  | 19 | 0.0499638 |
| 0.0901176 | 1        | 766  | 21 | 0.0340389 |
| 0.0747367 | 1        | 660  | 19 | 0.0341714 |
| 0.0803986 | 1        | 710  | 15 | 0.0124733 |
| 0.103412  | 1        | 879  | 23 | 0.0347451 |
| 0.140901  | 1        | 1204 | 31 | 0.0151039 |
| 0.0731541 | 1        | 642  | 16 | 0.0439523 |
| 0.0688235 | 1        | 585  | 16 | 0.0468035 |
| 0.0703529 | 1        | 598  | 12 | 0.0416836 |
| 0.0878824 | 1        | 747  | 17 | 0.0329885 |
| 0.0966643 | 1        | 823  | 13 | 0.0131442 |
| 0.0863529 | 1        | 734  | 21 | 0.0350718 |
| 0.0957647 | 1        | 814  | 23 | 0.0477304 |
| 0.0700753 | 1        | 847  | 24 | 0.033783  |
| 0.064     | 0.987296 | 551  | 12 | 0.0436345 |
| 0.0937682 | 1        | 966  | 24 | 0.010081  |
| 0.113647  | 1        | 966  | 24 | 0.010081  |

|           |   |      |    |            |
|-----------|---|------|----|------------|
| 0.0627059 | 1 | 533  | 15 | 0.0446585  |
| 0.139647  | 1 | 1187 | 28 | 0.0120584  |
| 0.0697647 | 1 | 593  | 11 | 0.041048   |
| 0.0952325 | 1 | 815  | 17 | 0.0349923  |
| 0.116471  | 1 | 990  | 24 | 0.0334828  |
| 0.0476661 | 1 | 676  | 19 | 0.0489398  |
| 0.0892857 | 1 | 760  | 19 | 0.0326177  |
| 0.0503529 | 1 | 428  | 12 | 0.0437669  |
| 0.0771765 | 1 | 656  | 19 | 0.0439258  |
| 0.108353  | 1 | 921  | 25 | 0.0213891  |
| 0.0274993 | 1 | 587  | 17 | 0.0459031  |
| 0.0575772 | 1 | 587  | 17 | 0.0459031  |
| 0.182706  | 1 | 1553 | 43 | 0.0338889  |
| 0.0862353 | 1 | 733  | 20 | 0.0326795  |
| 0.09      | 1 | 765  | 21 | 0.0323882  |
| 0.0982353 | 1 | 835  | 19 | 0.0222542  |
| 0.0765882 | 1 | 651  | 18 | 0.040792   |
| 0.116471  | 1 | 990  | 28 | 0.0336594  |
| 0.0870588 | 1 | 740  | 21 | 0.0245052  |
| 0.0869974 | 1 | 740  | 21 | 0.0245052  |
| 0.123294  | 1 | 1048 | 23 | 0.0288219  |
| 0.0695438 | 1 | 593  | 17 | 0.0446408  |
| 0.0767059 | 1 | 652  | 18 | 0.0487809  |
| 0.0846082 | 1 | 730  | 21 | 0.032397   |
| 0.10106   | 1 | 877  | 25 | 0.0325559  |
| 0.0802353 | 1 | 682  | 15 | 0.0416659  |
| 0.0721311 | 1 | 616  | 13 | 0.04427    |
| 0.0754761 | 1 | 650  | 14 | 0.0483572  |
| 0.0717478 | 1 | 610  | 17 | 0.0456295  |
| 0.0781176 | 1 | 664  | 19 | 0.0461503  |
| 0.0496519 | 1 | 649  | 13 | 0.0106283  |
| 0.0747456 | 1 | 977  | 25 | 0.0165251  |
| 0.0646067 | 1 | 552  | 10 | 0.0394502  |
| 0.0755294 | 1 | 642  | 12 | 0.0408538  |
| 0.0474633 | 1 | 653  | 18 | 0.0339242  |
| 0.129882  | 1 | 1104 | 20 | 0.00938366 |
| 0.11      | 1 | 935  | 26 | 0.03117    |
| 0.104118  | 1 | 885  | 24 | 0.0463887  |
| 0.0635294 | 1 | 540  | 15 | 0.0477569  |
| 0.0763529 | 1 | 649  | 13 | 0.0496725  |
| 0.0750588 | 1 | 638  | 18 | 0.0487368  |
| 0.0710588 | 1 | 604  | 17 | 0.0446408  |
| 0.086     | 1 | 731  | 21 | 0.0434491  |
| 0.0804706 | 1 | 684  | 19 | 0.0239049  |
| 0.110941  | 1 | 943  | 27 | 0.0171431  |
| 0.0789079 | 1 | 948  | 25 | 0.0246994  |
| 0.111412  | 1 | 947  | 26 | 0.0334828  |

|           |          |      |    |           |
|-----------|----------|------|----|-----------|
| 0.0847059 | 1        | 720  | 20 | 0.0386204 |
| 0.170235  | 1        | 1447 | 34 | 0.0234371 |
| 0.128824  | 1        | 1095 | 26 | 0.0338801 |
| 0.0699671 | 1        | 595  | 17 | 0.0440229 |
| 0.112183  | 1        | 954  | 27 | 0.0150244 |
| 0.151529  | 1        | 1288 | 31 | 0.0210272 |
| 0.0666667 | 1        | 569  | 16 | 0.0441553 |
| 0.0838808 | 1        | 715  | 15 | 0.0330061 |
| 0.0888343 | 1        | 759  | 15 | 0.0495313 |
| 0.120118  | 1        | 1021 | 26 | 0.0236048 |
| 0.0729412 | 0.982567 | 631  | 12 | 0.0298988 |
| 0.0961606 | 1        | 819  | 23 | 0.0300577 |
| 0.0417654 | 1        | 617  | 12 | 0.0444466 |
| 0.0615989 | 1        | 910  | 23 | 0.0164545 |
| 0.0796471 | 1        | 677  | 19 | 0.0498402 |
| 0.0442025 | 1        | 613  | 17 | 0.0393002 |
| 0.0682628 | 1        | 613  | 17 | 0.0393002 |
| 0.0661926 | 1        | 754  | 21 | 0.0311259 |
| 0.0787956 | 1        | 683  | 19 | 0.0332092 |
| 0.0506909 | 1        | 653  | 14 | 0.0383379 |
| 0.143925  | 1        | 1232 | 26 | 0.0138062 |
| 0.0823584 | 1        | 704  | 16 | 0.0497784 |
| 0.0330208 | 1        | 634  | 18 | 0.042275  |
| 0.0847696 | 1        | 723  | 21 | 0.0493459 |
| 0.121531  | 1        | 1038 | 28 | 0.0340478 |
| 0.075401  | 1        | 644  | 18 | 0.0414717 |
| 0.0819232 | 1        | 702  | 20 | 0.0326354 |
| 0.0734914 | 1        | 626  | 16 | 0.026359  |
| 0.0880156 | 1        | 766  | 21 | 0.0431578 |
| 0.0358974 | 1        | 462  | 12 | 0.047704  |
| 0.063843  | 1        | 615  | 14 | 0.0352395 |
| 0.063717  | 1        | 589  | 17 | 0.0480041 |
| 0.0688325 | 1        | 589  | 17 | 0.0480041 |
| 0.0797979 | 1        | 679  | 15 | 0.0388853 |
| 0.092436  | 1        | 798  | 23 | 0.035725  |
| 0.0564621 | 1        | 609  | 17 | 0.0431048 |
| 0.0536471 | 0.987013 | 462  | 13 | 0.0371197 |
| 0.0799252 | 1        | 684  | 18 | 0.0318762 |
| 0.0703948 | 1        | 608  | 17 | 0.0498402 |
| 0.117775  | 1        | 1027 | 22 | 0.0247877 |
| 0.0768688 | 1        | 654  | 18 | 0.0445349 |
| 0.0537676 | 1        | 558  | 15 | 0.0148479 |
| 0.0551765 | 1        | 469  | 13 | 0.0421426 |
| 0.088218  | 1        | 751  | 19 | 0.0161985 |
| 0.0778823 | 1        | 662  | 19 | 0.0434756 |
| 0.0600562 | 1        | 513  | 14 | 0.0404124 |
| 0.0559326 | 1        | 478  | 14 | 0.0349923 |

|           |          |      |    |           |
|-----------|----------|------|----|-----------|
| 0.0865882 | 1        | 736  | 16 | 0.0352925 |
| 0.103186  | 1        | 881  | 24 | 0.0493547 |
| 0.0844706 | 1        | 718  | 17 | 0.0440847 |
| 0.0792941 | 1        | 674  | 14 | 0.0443671 |
| 0.0754495 | 1        | 642  | 17 | 0.0476069 |
| 0.0908985 | 1        | 778  | 20 | 0.0216363 |
| 0.0896471 | 1        | 762  | 18 | 0.0321499 |
| 0.0896471 | 1        | 762  | 18 | 0.0321499 |
| 0.0715294 | 1        | 608  | 17 | 0.0441641 |
| 0.0736938 | 1        | 646  | 13 | 0.0296781 |
| 0.13762   | 1        | 1175 | 31 | 0.0165869 |
| 0.0444706 | 1        | 378  | 11 | 0.0328649 |
| 0.0723529 | 1        | 615  | 11 | 0.0462562 |
| 0.0736471 | 1        | 626  | 17 | 0.0289631 |
| 0.0736297 | 1        | 626  | 17 | 0.0289631 |
| 0.07      | 1        | 595  | 17 | 0.0396533 |
| 0.0535506 | 1        | 966  | 28 | 0.0237019 |
| 0.0770588 | 1        | 655  | 17 | 0.042072  |
| 0.0721176 | 1        | 613  | 17 | 0.0496284 |
| 0.0776471 | 1        | 660  | 19 | 0.0465476 |
| 0.0751233 | 1        | 655  | 19 | 0.0483484 |
| 0.107176  | 1        | 911  | 26 | 0.0168517 |
| 0.0737869 | 1        | 628  | 14 | 0.0319556 |
| 0.0698824 | 1        | 594  | 13 | 0.0492664 |
| 0.0774118 | 1        | 658  | 19 | 0.0367931 |
| 0.0149977 | 0.199693 | 651  | 19 | 0.0454971 |
| 0.119412  | 1        | 1015 | 28 | 0.0227132 |
| 0.0712817 | 1        | 624  | 16 | 0.0346392 |
| 0.126571  | 1        | 1108 | 31 | 0.0131972 |
| 0.0974435 | 1        | 850  | 21 | 0.0415865 |
| 0.0971885 | 1        | 840  | 22 | 0.0243816 |
| 0.0917744 | 1        | 781  | 22 | 0.0274271 |
| 0.0741481 | 1        | 631  | 12 | 0.0466976 |
| 0.0687059 | 1        | 584  | 16 | 0.0491958 |
| 0.0622353 | 1        | 529  | 15 | 0.0335005 |
| 0.0696471 | 1        | 592  | 14 | 0.0435021 |
| 0.0728235 | 1        | 619  | 14 | 0.0429018 |
| 0.0600166 | 1        | 796  | 23 | 0.0457354 |
| 0.12932   | 1        | 1100 | 30 | 0.0102664 |
| 0.0690588 | 1        | 587  | 15 | 0.0482778 |
| 0.0812667 | 1        | 698  | 18 | 0.0341537 |
| 0.133059  | 1        | 1131 | 18 | 0.0187673 |
| 0.13168   | 1        | 1131 | 18 | 0.0187673 |
| 0.0678629 | 1        | 885  | 21 | 0.032397  |
| 0.0560412 | 1        | 686  | 20 | 0.0452411 |
| 0.0481987 | 1        | 590  | 17 | 0.0460532 |
| 0.0999066 | 1        | 856  | 24 | 0.0209477 |



|           |          |      |    |            |
|-----------|----------|------|----|------------|
| 0.0888085 | 1        | 761  | 14 | 0.0222365  |
| 0.0720514 | 1        | 628  | 18 | 0.0480394  |
| 0.0858852 | 1        | 732  | 21 | 0.028866   |
| 0.0816875 | 1        | 699  | 16 | 0.0394767  |
| 0.0710588 | 1        | 604  | 10 | 0.0333328  |
| 0.103832  | 1        | 886  | 25 | 0.0462298  |
| 0.0735743 | 1        | 627  | 12 | 0.0441906  |
| 0.150053  | 1        | 1278 | 34 | 0.0226426  |
| 0.0766698 | 1        | 652  | 18 | 0.0379142  |
| 0.0729863 | 1        | 666  | 17 | 0.0189439  |
| 0.075651  | 1        | 645  | 18 | 0.0348864  |
| 0.0728235 | 1        | 619  | 18 | 0.0495048  |
| 0.113933  | 1        | 969  | 20 | 0.021292   |
| 0.0712941 | 0.918182 | 660  | 19 | 0.0455412  |
| 0.0697347 | 1        | 594  | 17 | 0.0466005  |
| 0.102118  | 1        | 868  | 20 | 0.0100369  |
| 0.0549624 | 1        | 592  | 12 | 0.0474833  |
| 0.0821559 | 1        | 785  | 22 | 0.0473244  |
| 0.0623794 | 1        | 711  | 20 | 0.0337741  |
| 0.0834213 | 1        | 711  | 20 | 0.0337741  |
| 0.0937647 | 1        | 797  | 19 | 0.0487721  |
| 0.0540521 | 1        | 763  | 21 | 0.0448174  |
| 0.105805  | 1        | 904  | 25 | 0.0328296  |
| 0.106353  | 1        | 904  | 25 | 0.0328296  |
| 0.0747653 | 1        | 637  | 17 | 0.048622   |
| 0.0795294 | 1        | 676  | 13 | 0.0394149  |
| 0.0710588 | 1        | 604  | 17 | 0.0468035  |
| 0.0622178 | 1        | 689  | 14 | 0.0328472  |
| 0.0835392 | 1        | 744  | 21 | 0.0260854  |
| 0.0992589 | 1        | 884  | 22 | 0.0191469  |
| 0.0748826 | 1        | 638  | 18 | 0.038285   |
| 0.0654825 | 1        | 988  | 22 | 0.033474   |
| 0.0875235 | 1        | 745  | 17 | 0.0488427  |
| 0.112353  | 1        | 955  | 23 | 0.0221394  |
| 0.0712941 | 1        | 606  | 17 | 0.0495842  |
| 0.0649412 | 1        | 552  | 14 | 0.0431578  |
| 0.0936697 | 1        | 802  | 21 | 0.0439081  |
| 0.133964  | 1        | 1147 | 29 | 0.0160131  |
| 0.0715294 | 1        | 608  | 18 | 0.0387087  |
| 0.128756  | 1        | 1487 | 41 | 0.0273212  |
| 0.088     | 1        | 748  | 21 | 0.0447467  |
| 0.0869339 | 1        | 1004 | 16 | 0.0338801  |
| 0.0804972 | 1        | 693  | 18 | 0.0182553  |
| 0.0326526 | 0.408369 | 693  | 18 | 0.0182553  |
| 0.119699  | 1        | 1019 | 27 | 0.00992214 |
| 0.122235  | 1        | 1039 | 27 | 0.00998393 |
| 0.129647  | 1        | 1102 | 31 | 0.013206   |

|           |          |      |    |            |
|-----------|----------|------|----|------------|
| 0.108     | 1        | 918  | 26 | 0.0353896  |
| 0.0614085 | 1        | 538  | 11 | 0.0475716  |
| 0.107076  | 1        | 911  | 24 | 0.0311259  |
| 0.0883529 | 1        | 751  | 19 | 0.0465476  |
| 0.138941  | 1        | 1181 | 28 | 0.0216539  |
| 0.106941  | 1        | 909  | 25 | 0.00525238 |
| 0.0556471 | 0.483146 | 979  | 20 | 0.0356191  |
| 0.117647  | 1        | 1000 | 23 | 0.0332092  |
| 0.0767059 | 1        | 652  | 18 | 0.0438993  |
| 0.0682353 | 1        | 580  | 16 | 0.0493371  |
| 0.185882  | 1        | 1580 | 43 | 0.0172755  |
| 0.057874  | 1        | 735  | 21 | 0.0232341  |
| 0.0553799 | 1        | 473  | 10 | 0.0282216  |
| 0.0772941 | 1        | 657  | 17 | 0.0317085  |
| 0.0483529 | 1        | 411  | 10 | 0.0428312  |
| 0.126588  | 1        | 1076 | 28 | 0.0220247  |
| 0.0983529 | 1        | 836  | 23 | 0.0332798  |
| 0.0788235 | 1        | 670  | 19 | 0.0389647  |
| 0.0812941 | 0.885897 | 780  | 22 | 0.0280627  |
| 0.0712941 | 1        | 606  | 16 | 0.0452676  |
| 0.0674353 | 1        | 930  | 26 | 0.0326619  |
| 0.06835   | 1        | 582  | 14 | 0.0481188  |
| 0.0804921 | 1        | 687  | 15 | 0.0320704  |
| 0.0799485 | 1        | 683  | 19 | 0.0316908  |
| 0.0902353 | 1        | 767  | 18 | 0.0331739  |
| 0.0963529 | 1        | 819  | 19 | 0.0308081  |
| 0.0849412 | 1        | 722  | 20 | 0.031117   |
| 0.0790588 | 1        | 672  | 17 | 0.0383909  |
| 0.227529  | 1        | 1934 | 48 | 0.004555   |
| 0.102157  | 1        | 1269 | 34 | 0.0181494  |
| 0.0791569 | 1        | 676  | 17 | 0.0484896  |
| 0.0838702 | 1        | 716  | 18 | 0.0463357  |
| 0.0937096 | 1        | 797  | 21 | 0.0232605  |
| 0.0756471 | 1        | 643  | 16 | 0.0395473  |
| 0.0769962 | 1        | 810  | 18 | 0.0317614  |
| 0.0381176 | 0.4      | 810  | 18 | 0.0317614  |
| 0.0795294 | 1        | 676  | 19 | 0.0482248  |
| 0.121412  | 1        | 1032 | 22 | 0.0224661  |
| 0.0887059 | 1        | 754  | 20 | 0.0201356  |
| 0.0573181 | 1        | 757  | 14 | 0.0493017  |
| 0.0732506 | 1        | 626  | 15 | 0.0464858  |
| 0.0711023 | 1        | 607  | 11 | 0.0471743  |
| 0.0512074 | 1        | 827  | 23 | 0.0431048  |
| 0.0546383 | 1        | 738  | 21 | 0.032397   |
| 0.0744831 | 1        | 634  | 18 | 0.0419572  |
| 0.080506  | 1        | 700  | 14 | 0.0284688  |
| 0.0759821 | 1        | 646  | 18 | 0.0273035  |

|           |   |      |    |            |
|-----------|---|------|----|------------|
| 0.110674  | 1 | 957  | 26 | 0.0244169  |
| 0.0755294 | 1 | 642  | 18 | 0.0266415  |
| 0.0557419 | 1 | 482  | 14 | 0.0328472  |
| 0.0889412 | 1 | 756  | 20 | 0.0425222  |
| 0.0429051 | 1 | 371  | 10 | 0.0441553  |
| 0.0571294 | 1 | 486  | 14 | 0.0240462  |
| 0.0737925 | 1 | 631  | 13 | 0.0421073  |
| 0.0804813 | 1 | 689  | 39 | 0.0114228  |
| 0.104452  | 1 | 1023 | 24 | 0.00664713 |
| 0.0975979 | 1 | 837  | 16 | 0.0111933  |
| 0.101176  | 1 | 860  | 24 | 0.0357868  |
| 0.0619388 | 1 | 538  | 14 | 0.0487721  |
| 0.103511  | 1 | 914  | 25 | 0.0428577  |
| 0.0876471 | 1 | 745  | 21 | 0.0446232  |
| 0.101754  | 1 | 1027 | 26 | 0.0287071  |
| 0.073887  | 1 | 629  | 18 | 0.0259794  |
| 0.109138  | 1 | 1149 | 30 | 0.0113787  |
| 0.0698824 | 1 | 594  | 17 | 0.0415512  |
| 0.127647  | 1 | 1085 | 30 | 0.049443   |
| 0.0725882 | 1 | 617  | 14 | 0.0307551  |
| 0.0689817 | 1 | 588  | 10 | 0.0447114  |
| 0.121882  | 1 | 1036 | 27 | 0.0229251  |
| 0.117474  | 1 | 1001 | 28 | 0.0209742  |
| 0.0751765 | 1 | 639  | 18 | 0.040589   |
| 0.0822353 | 1 | 699  | 20 | 0.0323087  |
| 0.0807059 | 1 | 686  | 19 | 0.0288219  |
| 0.0697647 | 1 | 593  | 13 | 0.0375788  |
| 0.0914118 | 1 | 777  | 19 | 0.033933   |
| 0.04265   | 1 | 609  | 17 | 0.0438375  |
| 0.077748  | 1 | 667  | 17 | 0.0492576  |
| 0.10957   | 1 | 940  | 26 | 0.030914   |
| 0.0838824 | 1 | 713  | 20 | 0.0295193  |
| 0.0875294 | 1 | 744  | 21 | 0.0330503  |
| 0.0942353 | 1 | 801  | 20 | 0.046883   |
| 0.0850588 | 1 | 723  | 20 | 0.0340301  |
| 0.0778769 | 1 | 672  | 19 | 0.0463887  |
| 0.0656333 | 1 | 614  | 14 | 0.0462562  |
| 0.0717647 | 1 | 610  | 17 | 0.0463357  |
| 0.0757435 | 1 | 652  | 18 | 0.0240727  |
| 0.0703529 | 1 | 598  | 17 | 0.0450027  |
| 0.112588  | 1 | 957  | 27 | 0.0345421  |
| 0.0923709 | 1 | 787  | 19 | 0.0324323  |
| 0.0689183 | 1 | 604  | 17 | 0.0337212  |
| 0.062454  | 1 | 763  | 18 | 0.0403065  |
| 0.0566733 | 1 | 800  | 22 | 0.0283628  |
| 0.0249248 | 1 | 588  | 17 | 0.0435992  |
| 0.0878439 | 1 | 779  | 21 | 0.0336682  |

|           |          |      |    |           |
|-----------|----------|------|----|-----------|
| 0.0664186 | 1        | 589  | 17 | 0.0480571 |
| 0.0709412 | 1        | 603  | 16 | 0.043811  |
| 0.0403704 | 1        | 654  | 19 | 0.042072  |
| 0.0515221 | 1        | 875  | 21 | 0.0497696 |
| 0.0776471 | 1        | 660  | 13 | 0.0414188 |
| 0.119278  | 1        | 1037 | 28 | 0.0161191 |
| 0.0752099 | 1        | 645  | 18 | 0.0446585 |
| 0.0414917 | 1        | 593  | 11 | 0.0479335 |
| 0.0425239 | 1        | 556  | 10 | 0.0421073 |
| 0.100481  | 1        | 856  | 21 | 0.0498402 |
| 0.0477756 | 1        | 407  | 11 | 0.0470684 |
| 0.0924686 | 1        | 787  | 19 | 0.0246553 |
| 0.108683  | 1        | 925  | 22 | 0.0243905 |
| 0.0845252 | 1        | 721  | 20 | 0.0487015 |
| 0.101294  | 1        | 861  | 25 | 0.0327325 |
| 0.0417647 | 1        | 355  | 10 | 0.0489398 |
| 0.081465  | 1        | 694  | 14 | 0.0333769 |
| 0.0729412 | 1        | 620  | 17 | 0.0471037 |
| 0.0965929 | 1        | 825  | 19 | 0.0356014 |
| 0.127176  | 1        | 1081 | 60 | 0.0212037 |
| 0.11      | 1        | 935  | 23 | 0.0168606 |
| 0.0579838 | 1        | 788  | 16 | 0.0458678 |
| 0.0727059 | 1        | 618  | 15 | 0.0441553 |
| 0.0981695 | 1        | 842  | 20 | 0.0270917 |
| 0.101176  | 1        | 860  | 22 | 0.015969  |
| 0.0776471 | 1        | 660  | 16 | 0.0122791 |
| 0.0722934 | 1        | 615  | 18 | 0.0359016 |
| 0.0743529 | 1        | 632  | 18 | 0.0348511 |
| 0.094     | 0.720469 | 1109 | 31 | 0.0229427 |
| 0.0234118 | 0.252218 | 789  | 22 | 0.0321499 |
| 0.0917442 | 1        | 789  | 22 | 0.0321499 |
| 0.129397  | 1        | 1100 | 30 | 0.0100899 |
| 0.0864706 | 1        | 735  | 17 | 0.0276831 |
| 0.0929001 | 1        | 1158 | 30 | 0.0222718 |
| 0.0652941 | 1        | 555  | 13 | 0.0130912 |
| 0.114471  | 1        | 973  | 24 | 0.0368902 |
| 0.0907059 | 1        | 771  | 22 | 0.0333592 |
| 0.0728235 | 1        | 619  | 18 | 0.0350012 |
| 0.0562389 | 1        | 631  | 12 | 0.0399622 |
| 0.0546334 | 1        | 655  | 17 | 0.0352042 |
| 0.0769773 | 1        | 655  | 17 | 0.0352042 |
| 0.0768235 | 1        | 653  | 14 | 0.0479246 |
| 0.056815  | 1        | 614  | 11 | 0.0466182 |
| 0.0679521 | 1        | 726  | 17 | 0.0193323 |
| 0.0376117 | 1        | 526  | 14 | 0.0454353 |
| 0.09      | 1        | 765  | 21 | 0.0467064 |
| 0.0996471 | 1        | 847  | 21 | 0.0261118 |

|           |          |      |    |           |
|-----------|----------|------|----|-----------|
| 0.0669311 | 1        | 1080 | 28 | 0.013153  |
| 0.0344571 | 1        | 556  | 16 | 0.0391677 |
| 0.0783674 | 1        | 697  | 18 | 0.0422574 |
| 0.0779541 | 1        | 663  | 16 | 0.0330767 |
| 0.110235  | 1        | 937  | 26 | 0.0333769 |
| 0.0687756 | 1        | 587  | 13 | 0.0414011 |
| 0.0983529 | 1        | 836  | 24 | 0.0424428 |
| 0.105176  | 1        | 894  | 25 | 0.0468565 |
| 0.0742348 | 1        | 633  | 18 | 0.0345863 |
| 0.0729412 | 0.984127 | 630  | 18 | 0.049443  |
| 0.0757647 | 1        | 644  | 11 | 0.040792  |
| 0.061842  | 1        | 699  | 13 | 0.0350012 |
| 0.0722353 | 1        | 614  | 18 | 0.0437934 |
| 0.067969  | 1        | 588  | 16 | 0.046062  |
| 0.0408235 | 1        | 347  | 10 | 0.0429106 |
| 0.0708232 | 1        | 610  | 13 | 0.0371462 |
| 0.0736568 | 1        | 680  | 19 | 0.0319821 |
| 0.0931765 | 1        | 792  | 21 | 0.0360693 |
| 0.0810588 | 1        | 689  | 17 | 0.0317526 |
| 0.0989412 | 1        | 841  | 24 | 0.0454794 |
| 0.059535  | 1        | 507  | 11 | 0.046168  |
| 0.0596471 | 1        | 507  | 11 | 0.046168  |
| 0.0729739 | 1        | 624  | 18 | 0.0413393 |
| 0.0738696 | 1        | 629  | 17 | 0.0450822 |
| 0.0720498 | 1        | 613  | 13 | 0.0333681 |
| 0.0710421 | 1        | 604  | 17 | 0.0488957 |
| 0.0948012 | 1        | 806  | 17 | 0.023543  |
| 0.107647  | 1        | 915  | 23 | 0.0228456 |
| 0.0684915 | 1        | 583  | 16 | 0.0493812 |
| 0.077792  | 1        | 668  | 19 | 0.0437934 |
| 0.0458328 | 1        | 391  | 12 | 0.0475186 |
| 0.106787  | 1        | 911  | 24 | 0.0336064 |
| 0.0695764 | 1        | 593  | 16 | 0.0362635 |
| 0.101018  | 1        | 863  | 21 | 0.0266062 |
| 0.0841176 | 1        | 715  | 20 | 0.0220247 |
| 0.0786149 | 1        | 672  | 17 | 0.04427   |
| 0.0925643 | 1        | 788  | 20 | 0.0472361 |
| 0.0711765 | 1        | 605  | 17 | 0.0492311 |
| 0.114824  | 1        | 976  | 25 | 0.0310111 |
| 0.080821  | 1        | 756  | 21 | 0.0326177 |
| 0.0767621 | 1        | 917  | 24 | 0.0244523 |
| 0.0783119 | 1        | 720  | 16 | 0.0463887 |
| 0.117529  | 1        | 999  | 23 | 0.0450027 |
| 0.106824  | 1        | 908  | 25 | 0.013206  |
| 0.0755116 | 1        | 642  | 18 | 0.0343921 |
| 0.0724706 | 1        | 616  | 17 | 0.0430783 |
| 0.0964706 | 1        | 820  | 23 | 0.0195088 |

|           |          |      |    |            |
|-----------|----------|------|----|------------|
| 0.0728235 | 1        | 619  | 17 | 0.0240638  |
| 0.054889  | 1        | 613  | 10 | 0.0457178  |
| 0.0726846 | 1        | 620  | 12 | 0.0314613  |
| 0.0702405 | 1        | 777  | 17 | 0.0475098  |
| 0.0715038 | 1        | 611  | 17 | 0.0492841  |
| 0.0760593 | 1        | 657  | 15 | 0.0447909  |
| 0.0736471 | 1        | 626  | 18 | 0.0414011  |
| 0.0758089 | 1        | 649  | 14 | 0.0474833  |
| 0.0777843 | 1        | 667  | 19 | 0.0290602  |
| 0.0912941 | 1        | 776  | 20 | 0.0346834  |
| 0.108235  | 1        | 920  | 22 | 0.0293604  |
| 0.0685882 | 1        | 583  | 14 | 0.0453205  |
| 0.0750588 | 1        | 638  | 15 | 0.0326707  |
| 0.0821516 | 1        | 701  | 20 | 0.0211155  |
| 0.0593955 | 1        | 507  | 14 | 0.0483837  |
| 0.0701176 | 1        | 596  | 16 | 0.0437934  |
| 0.0504706 | 0.396488 | 1082 | 27 | 0.019809   |
| 0.116334  | 1        | 990  | 28 | 0.0325824  |
| 0.078     | 1        | 663  | 18 | 0.0491958  |
| 0.0908988 | 1        | 801  | 20 | 0.0456736  |
| 0.0909624 | 1        | 775  | 21 | 0.0405713  |
| 0.0807059 | 1        | 686  | 12 | 0.0426546  |
| 0.0681498 | 1        | 1112 | 28 | 0.0328384  |
| 0.0889924 | 1        | 764  | 21 | 0.0310994  |
| 0.100941  | 1        | 858  | 24 | 0.0283982  |
| 0.0745882 | 1        | 634  | 16 | 0.0298812  |
| 0.0842353 | 1        | 716  | 20 | 0.0417895  |
| 0.0712941 | 1        | 606  | 17 | 0.0452146  |
| 0.0467059 | 0.449604 | 883  | 25 | 0.0162603  |
| 0.0858824 | 1        | 730  | 17 | 0.0424781  |
| 0.0770674 | 1        | 657  | 19 | 0.0461503  |
| 0.121074  | 1        | 1033 | 28 | 0.0233929  |
| 0.114392  | 1        | 988  | 26 | 0.0317173  |
| 0.062     | 1        | 527  | 15 | 0.042531   |
| 0.0857647 | 1        | 729  | 18 | 0.0476598  |
| 0.0855294 | 1        | 727  | 21 | 0.0318762  |
| 0.106001  | 1        | 922  | 26 | 0.0326265  |
| 0.0716435 | 1        | 619  | 17 | 0.0438287  |
| 0.0674133 | 1        | 614  | 14 | 0.0460091  |
| 0.0880253 | 1        | 752  | 21 | 0.0404213  |
| 0.0680562 | 1        | 591  | 17 | 0.0493371  |
| 0.0749108 | 1        | 693  | 19 | 0.0298812  |
| 0.0674082 | 1        | 600  | 17 | 0.046168   |
| 0.0931612 | 1        | 801  | 22 | 0.0329708  |
| 0.0410509 | 1        | 350  | 10 | 0.0408185  |
| 0.131038  | 1        | 1115 | 31 | 0.00810367 |
| 0.0816171 | 1        | 856  | 18 | 0.032706   |

|           |          |      |    |            |
|-----------|----------|------|----|------------|
| 0.105109  | 1        | 897  | 19 | 0.046168   |
| 0.08281   | 1        | 712  | 18 | 0.0401123  |
| 0.0633803 | 1        | 540  | 15 | 0.0311259  |
| 0.0678824 | 1        | 577  | 10 | 0.0466888  |
| 0.0404706 | 1        | 344  | 10 | 0.0478099  |
| 0.0275574 | 1        | 653  | 15 | 0.0204093  |
| 0.0442668 | 1        | 598  | 17 | 0.0480924  |
| 0.0556581 | 1        | 603  | 17 | 0.0371815  |
| 0.0943529 | 1        | 802  | 20 | 0.0332886  |
| 0.092     | 1        | 782  | 22 | 0.0335093  |
| 0.133817  | 1        | 1144 | 32 | 0.0126057  |
| 0.0694864 | 1        | 598  | 16 | 0.0225014  |
| 0.103579  | 0.994475 | 905  | 25 | 0.0165516  |
| 0.0770588 | 1        | 655  | 19 | 0.0337741  |
| 0.0895733 | 1        | 762  | 20 | 0.0460091  |
| 0.0838824 | 1        | 713  | 20 | 0.048675   |
| 0.0838824 | 1        | 713  | 20 | 0.048675   |
| 0.0427928 | 1        | 627  | 12 | 0.0338536  |
| 0.0744382 | 1        | 636  | 18 | 0.0484366  |
| 0.077031  | 1        | 659  | 14 | 0.0355838  |
| 0.0828548 | 1        | 707  | 14 | 0.0386293  |
| 0.0900035 | 0.969697 | 792  | 19 | 0.0355838  |
| 0.0995294 | 1        | 846  | 17 | 0.0296164  |
| 0.080207  | 1        | 682  | 19 | 0.0360163  |
| 0.0457256 | 0.498724 | 784  | 19 | 0.0295987  |
| 0.0741176 | 1        | 630  | 15 | 0.0301019  |
| 0.0976471 | 1        | 830  | 22 | 0.0411363  |
| 0.157551  | 1        | 1351 | 37 | 0.0161544  |
| 0.0976471 | 1        | 830  | 23 | 0.0192882  |
| 0.0856471 | 1        | 728  | 20 | 0.0467771  |
| 0.0802259 | 1        | 682  | 18 | 0.0476598  |
| 0.071521  | 1        | 608  | 16 | 0.0473244  |
| 0.0703948 | 1        | 822  | 23 | 0.0239138  |
| 0.069172  | 1        | 589  | 17 | 0.0483395  |
| 0.064657  | 1        | 755  | 20 | 0.0357691  |
| 0.177452  | 1        | 1511 | 43 | 0.00947194 |
| 0.0770588 | 1        | 655  | 18 | 0.0232429  |
| 0.168     | 1        | 1428 | 37 | 0.0463887  |
| 0.0982965 | 1        | 854  | 24 | 0.0498402  |
| 0.0811765 | 1        | 690  | 19 | 0.0411539  |
| 0.126     | 1        | 1071 | 29 | 0.0341978  |
| 0.0744706 | 1        | 633  | 18 | 0.04427    |
| 0.0753986 | 1        | 1168 | 27 | 0.0125704  |
| 0.0812941 | 1        | 691  | 16 | 0.0351777  |
| 0.0744219 | 1        | 634  | 13 | 0.0409333  |
| 0.0722085 | 1        | 615  | 13 | 0.039459   |
| 0.127612  | 1        | 1093 | 20 | 0.0326707  |

|           |          |      |    |            |
|-----------|----------|------|----|------------|
| 0.0801787 | 1        | 682  | 16 | 0.041251   |
| 0.139294  | 1        | 1184 | 27 | 0.0163133  |
| 0.0820394 | 1        | 708  | 20 | 0.0242316  |
| 0.115361  | 1        | 1134 | 31 | 0.0167017  |
| 0.0595086 | 0.453416 | 1127 | 27 | 0.0206829  |
| 0.0684223 | 1        | 582  | 17 | 0.0455324  |
| 0.0591765 | 1        | 503  | 14 | 0.0474833  |
| 0.0721176 | 1        | 613  | 17 | 0.0492576  |
| 0.0667548 | 1        | 606  | 14 | 0.0498844  |
| 0.0881869 | 1        | 751  | 17 | 0.0328472  |
| 0.0908986 | 1        | 788  | 18 | 0.0300754  |
| 0.0927059 | 1        | 788  | 18 | 0.0300754  |
| 0.0876318 | 1        | 931  | 25 | 0.0182288  |
| 0.0801177 | 1        | 681  | 15 | 0.0486485  |
| 0.0693688 | 1        | 611  | 17 | 0.0394944  |
| 0.104791  | 1        | 923  | 25 | 0.036034   |
| 0.0994118 | 1        | 845  | 24 | 0.0315408  |
| 0.0362241 | 1        | 604  | 17 | 0.0394767  |
| 0.120179  | 1        | 1047 | 29 | 0.0198443  |
| 0.137631  | 1        | 1170 | 28 | 0.0104518  |
| 0.118184  | 1        | 1023 | 29 | 0.0119613  |
| 0.0718297 | 1        | 614  | 17 | 0.0490104  |
| 0.0797229 | 1        | 679  | 16 | 0.0491252  |
| 0.0871765 | 1        | 741  | 19 | 0.0491958  |
| 0.0854867 | 1        | 837  | 24 | 0.0164633  |
| 0.0763269 | 1        | 650  | 19 | 0.0291044  |
| 0.0939408 | 1        | 800  | 21 | 0.0324941  |
| 0.0921514 | 1        | 789  | 22 | 0.0485073  |
| 0.084     | 1        | 714  | 20 | 0.0262796  |
| 0.0742353 | 1        | 631  | 17 | 0.0438993  |
| 0.123465  | 1        | 1056 | 23 | 0.0292191  |
| 0.0754848 | 1        | 654  | 18 | 0.0436433  |
| 0.02465   | 1        | 419  | 10 | 0.0493812  |
| 0.0697838 | 1        | 594  | 17 | 0.0489398  |
| 0.0405835 | 1        | 345  | 10 | 0.0430607  |
| 0.0693221 | 1        | 590  | 13 | 0.04811    |
| 0.0789412 | 1        | 671  | 19 | 0.0423721  |
| 0.108775  | 1        | 926  | 26 | 0.0298459  |
| 0.0932941 | 1        | 793  | 18 | 0.036034   |
| 0.0836471 | 1        | 711  | 20 | 0.0356809  |
| 0.0402318 | 1        | 493  | 14 | 0.0463357  |
| 0.0541048 | 1        | 663  | 18 | 0.0290602  |
| 0.127804  | 1        | 1094 | 31 | 0.00632934 |
| 0.0750552 | 1        | 646  | 18 | 0.0483219  |
| 0.0827059 | 1        | 703  | 17 | 0.0220158  |
| 0.0905882 | 1        | 770  | 21 | 0.0321499  |
| 0.069675  | 1        | 596  | 15 | 0.0408979  |



|           |          |      |    |            |
|-----------|----------|------|----|------------|
| 0.0838824 | 1        | 713  | 21 | 0.0313642  |
| 0.104     | 1        | 884  | 21 | 0.0245229  |
| 0.129294  | 1        | 1099 | 30 | 0.0300577  |
| 0.0715584 | 1        | 630  | 18 | 0.0319821  |
| 0.0486157 | 1        | 583  | 15 | 0.0433961  |
| 0.0374969 | 1        | 598  | 17 | 0.0459473  |
| 0.0818025 | 1        | 1091 | 27 | 0.0346834  |
| 0.0907701 | 1        | 772  | 18 | 0.0246818  |
| 0.0725456 | 1        | 617  | 17 | 0.049902   |
| 0.0776608 | 1        | 664  | 19 | 0.0242227  |
| 0.0614118 | 1        | 522  | 15 | 0.00523472 |
| 0.100706  | 1        | 856  | 23 | 0.033783   |
| 0.120235  | 1        | 1022 | 18 | 0.0239138  |
| 0.0575294 | 0.766458 | 638  | 16 | 0.0323441  |
| 0.0497281 | 1        | 759  | 21 | 0.0333328  |
| 0.0998837 | 1        | 1374 | 36 | 0.0138327  |
| 0.0241749 | 1        | 471  | 10 | 0.0446408  |
| 0.0857738 | 1        | 741  | 21 | 0.0336329  |
| 0.0957647 | 1        | 814  | 23 | 0.0268004  |
| 0.0855646 | 1        | 735  | 21 | 0.0228898  |
| 0.0914118 | 1        | 777  | 16 | 0.0453911  |
| 0.0763529 | 1        | 649  | 16 | 0.0485161  |
| 0.0724824 | 1        | 619  | 18 | 0.0492223  |
| 0.0957922 | 1        | 815  | 21 | 0.0297311  |
| 0.094     | 1        | 799  | 22 | 0.0469448  |
| 0.0545214 | 1        | 659  | 12 | 0.0419043  |
| 0.0584055 | 1        | 600  | 17 | 0.0127116  |
| 0.0837549 | 1        | 712  | 20 | 0.0406949  |
| 0.0890588 | 1        | 757  | 21 | 0.03501    |
| 0.0340711 | 1        | 742  | 21 | 0.0352395  |
| 0.0699695 | 1        | 596  | 15 | 0.0462298  |
| 0.0884706 | 1        | 752  | 20 | 0.0446408  |
| 0.076285  | 1        | 653  | 17 | 0.0478275  |
| 0.0807417 | 1        | 688  | 20 | 0.0291485  |
| 0.0710011 | 1        | 605  | 15 | 0.0455059  |
| 0.0830588 | 1        | 706  | 20 | 0.0359192  |
| 0.148287  | 1        | 1264 | 36 | 0.0209565  |
| 0.0721176 | 1        | 613  | 18 | 0.0406772  |
| 0.100649  | 1        | 869  | 14 | 0.0237019  |
| 0.122824  | 1        | 1044 | 28 | 0.0235783  |
| 0.0716302 | 1        | 609  | 13 | 0.0459914  |
| 0.100471  | 1        | 854  | 23 | 0.0355838  |
| 0.0858244 | 1        | 735  | 20 | 0.0352042  |
| 0.0804706 | 1        | 684  | 19 | 0.0469713  |
| 0.108916  | 1        | 926  | 25 | 0.0408185  |
| 0.122     | 1        | 1037 | 27 | 0.016534   |
| 0.116353  | 1        | 989  | 26 | 0.0345863  |

|           |   |      |    |            |
|-----------|---|------|----|------------|
| 0.0882353 | 1 | 750  | 19 | 0.0478275  |
| 0.128238  | 1 | 1099 | 25 | 0.0310288  |
| 0.0698002 | 1 | 594  | 17 | 0.0335358  |
| 0.0401935 | 1 | 648  | 18 | 0.0350012  |
| 0.129059  | 1 | 1097 | 31 | 0.0271005  |
| 0.0174314 | 1 | 582  | 17 | 0.0495401  |
| 0.0598802 | 1 | 510  | 13 | 0.0484719  |
| 0.0850588 | 1 | 723  | 21 | 0.0446408  |
| 0.0698521 | 1 | 595  | 16 | 0.047651   |
| 0.0823529 | 1 | 700  | 20 | 0.0472891  |
| 0.0420569 | 1 | 687  | 20 | 0.0394326  |
| 0.0809412 | 1 | 688  | 20 | 0.0491252  |
| 0.191529  | 1 | 1628 | 46 | 0.0242227  |
| 0.103294  | 1 | 878  | 22 | 0.00527886 |
| 0.0829412 | 1 | 705  | 19 | 0.0463975  |
| 0.0846587 | 1 | 841  | 23 | 0.0169047  |
| 0.106314  | 1 | 948  | 27 | 0.0297576  |
| 0.068347  | 1 | 583  | 16 | 0.0479776  |
| 0.0764361 | 1 | 652  | 13 | 0.0438728  |
| 0.0767059 | 1 | 652  | 18 | 0.0449233  |
| 0.0924706 | 1 | 786  | 19 | 0.0480924  |
| 0.0703529 | 1 | 598  | 10 | 0.0402712  |
| 0.0353031 | 1 | 598  | 10 | 0.0402712  |
| 0.0722013 | 1 | 614  | 18 | 0.04156    |
| 0.146049  | 1 | 1242 | 27 | 0.0168606  |
| 0.142588  | 1 | 1212 | 28 | 0.0204093  |
| 0.0752941 | 1 | 640  | 13 | 0.0408803  |
| 0.082158  | 1 | 699  | 15 | 0.0174167  |
| 0.124     | 1 | 1054 | 30 | 0.0223954  |
| 0.0864399 | 1 | 742  | 21 | 0.0334916  |
| 0.0793317 | 1 | 679  | 16 | 0.0427164  |
| 0.0683705 | 1 | 626  | 18 | 0.0382055  |
| 0.0707059 | 1 | 601  | 12 | 0.0445437  |
| 0.0481236 | 1 | 754  | 21 | 0.0315055  |
| 0.114941  | 1 | 977  | 22 | 0.0474126  |
| 0.0810588 | 1 | 689  | 19 | 0.0422662  |
| 0.0974118 | 1 | 828  | 22 | 0.0403683  |
| 0.0850588 | 1 | 723  | 14 | 0.0276478  |
| 0.117765  | 1 | 1001 | 28 | 0.0320086  |
| 0.0875294 | 1 | 744  | 20 | 0.0284246  |
| 0.0842643 | 1 | 1335 | 37 | 0.0187673  |
| 0.0839781 | 1 | 1335 | 37 | 0.0187673  |
| 0.0774118 | 1 | 658  | 12 | 0.0307992  |
| 0.0959991 | 1 | 823  | 23 | 0.0339772  |
| 0.0782353 | 1 | 665  | 17 | 0.0468565  |
| 0.0934118 | 1 | 794  | 23 | 0.0403948  |
| 0.118941  | 1 | 1011 | 27 | 0.017196   |

|           |   |      |    |           |
|-----------|---|------|----|-----------|
| 0.0898824 | 1 | 764  | 21 | 0.0292279 |
| 0.0456471 | 1 | 388  | 11 | 0.0422927 |
| 0.0493138 | 1 | 618  | 18 | 0.0485867 |
| 0.0771765 | 1 | 656  | 18 | 0.0329002 |
| 0.0975294 | 1 | 829  | 21 | 0.0319027 |
| 0.0829412 | 1 | 705  | 20 | 0.0411892 |
| 0.0855294 | 1 | 727  | 21 | 0.0473685 |
| 0.0719915 | 1 | 612  | 15 | 0.0430872 |
| 0.106941  | 1 | 909  | 20 | 0.020983  |
| 0.0751765 | 1 | 639  | 17 | 0.0277891 |
| 0.101298  | 1 | 866  | 22 | 0.0234547 |
| 0.0811765 | 1 | 690  | 18 | 0.0449498 |
| 0.0387349 | 1 | 594  | 14 | 0.0474391 |
| 0.0689413 | 1 | 590  | 17 | 0.0235783 |
| 0.126706  | 1 | 1077 | 26 | 0.0100281 |
| 0.0987059 | 1 | 839  | 22 | 0.0254409 |
| 0.0743831 | 1 | 633  | 12 | 0.0482778 |
| 0.0764713 | 1 | 651  | 18 | 0.0426987 |
| 0.0472279 | 1 | 529  | 15 | 0.0326795 |
| 0.103606  | 1 | 882  | 25 | 0.0414452 |
| 0.100588  | 1 | 855  | 24 | 0.0336064 |
| 0.0696471 | 1 | 592  | 17 | 0.0469801 |
| 0.123556  | 1 | 1059 | 29 | 0.029431  |
| 0.0692895 | 1 | 590  | 12 | 0.0483837 |
| 0.0732941 | 1 | 623  | 14 | 0.0486838 |
| 0.0988659 | 1 | 863  | 24 | 0.0330944 |
| 0.0582353 | 1 | 495  | 14 | 0.0487986 |
| 0.111294  | 1 | 946  | 26 | 0.013206  |
| 0.0718824 | 1 | 611  | 12 | 0.0331032 |
| 0.0981043 | 1 | 916  | 21 | 0.0346039 |
| 0.0768961 | 1 | 657  | 13 | 0.048984  |
| 0.0864437 | 1 | 982  | 25 | 0.0330238 |
| 0.115529  | 1 | 982  | 25 | 0.0330238 |
| 0.107412  | 1 | 913  | 25 | 0.0238785 |
| 0.0896074 | 1 | 776  | 22 | 0.0301548 |
| 0.090941  | 1 | 776  | 22 | 0.0301548 |
| 0.143059  | 1 | 1216 | 30 | 0.0169577 |
| 0.0668235 | 1 | 568  | 16 | 0.0401035 |
| 0.106     | 1 | 901  | 19 | 0.0164633 |
| 0.101697  | 1 | 869  | 24 | 0.0485073 |
| 0.0723344 | 1 | 616  | 18 | 0.0414276 |
| 0.0391991 | 1 | 601  | 17 | 0.0435639 |
| 0.111294  | 1 | 946  | 26 | 0.0356897 |
| 0.0474118 | 1 | 403  | 12 | 0.0415159 |
| 0.0903529 | 1 | 768  | 21 | 0.0335181 |
| 0.048175  | 1 | 619  | 17 | 0.0466093 |
| 0.100118  | 1 | 851  | 24 | 0.0341625 |

|           |   |      |    |           |
|-----------|---|------|----|-----------|
| 0.0910588 | 1 | 774  | 22 | 0.0482336 |
| 0.0793234 | 1 | 694  | 18 | 0.0275684 |
| 0.0894299 | 1 | 764  | 19 | 0.0313995 |
| 0.0706171 | 1 | 951  | 26 | 0.0221747 |
| 0.0628661 | 1 | 601  | 17 | 0.0473244 |
| 0.0796025 | 1 | 761  | 21 | 0.0360075 |
| 0.0792941 | 1 | 674  | 15 | 0.0465211 |
| 0.0688073 | 1 | 585  | 16 | 0.0486573 |
| 0.0687471 | 1 | 586  | 14 | 0.0477304 |
| 0.0739003 | 1 | 630  | 18 | 0.0388323 |
| 0.0653779 | 1 | 558  | 16 | 0.0462651 |
| 0.113059  | 1 | 961  | 24 | 0.0123762 |
| 0.0967059 | 1 | 822  | 23 | 0.0375964 |
| 0.0708245 | 1 | 603  | 17 | 0.0488957 |
| 0.0751765 | 1 | 639  | 18 | 0.0326442 |
| 0.0723061 | 1 | 618  | 13 | 0.0492399 |
| 0.105059  | 1 | 893  | 24 | 0.0273212 |
| 0.0741219 | 1 | 631  | 18 | 0.0328208 |
| 0.0601847 | 1 | 593  | 17 | 0.0499903 |
| 0.0554846 | 1 | 478  | 14 | 0.0360163 |
| 0.0696471 | 1 | 592  | 17 | 0.0384704 |
| 0.0833906 | 1 | 728  | 15 | 0.0168871 |
| 0.0904823 | 1 | 771  | 22 | 0.0445349 |
| 0.115479  | 1 | 987  | 28 | 0.0310729 |
| 0.0723005 | 1 | 616  | 16 | 0.0407302 |
| 0.0771765 | 1 | 656  | 18 | 0.0453117 |
| 0.0589286 | 1 | 528  | 15 | 0.0324676 |
| 0.125529  | 1 | 1067 | 28 | 0.015969  |
| 0.0691765 | 1 | 588  | 13 | 0.0416836 |
| 0.104353  | 1 | 887  | 25 | 0.0359545 |
| 0.0985882 | 1 | 838  | 19 | 0.0203651 |
| 0.0858824 | 1 | 730  | 20 | 0.0229516 |
| 0.137176  | 1 | 1166 | 32 | 0.0106107 |
| 0.104941  | 1 | 892  | 23 | 0.0232164 |
| 0.030135  | 1 | 587  | 17 | 0.0479688 |
| 0.0334206 | 1 | 651  | 18 | 0.0345686 |
| 0.0521074 | 1 | 1015 | 23 | 0.0155011 |
| 0.0938142 | 1 | 822  | 23 | 0.0410127 |
| 0.110235  | 1 | 937  | 23 | 0.0331827 |
| 0.0403979 | 1 | 597  | 17 | 0.0491252 |
| 0.0961606 | 1 | 819  | 22 | 0.0245935 |
| 0.0850588 | 1 | 723  | 15 | 0.038488  |
| 0.0741846 | 1 | 671  | 16 | 0.0469271 |
| 0.0706583 | 1 | 629  | 17 | 0.0335623 |
| 0.0387537 | 1 | 602  | 13 | 0.047139  |
| 0.0730588 | 1 | 621  | 12 | 0.0461062 |
| 0.0664706 | 1 | 565  | 16 | 0.0444289 |

|           |          |      |    |            |
|-----------|----------|------|----|------------|
| 0.108808  | 1        | 929  | 26 | 0.0340654  |
| 0.0804706 | 1        | 684  | 16 | 0.0171431  |
| 0.0703529 | 1        | 598  | 17 | 0.0497255  |
| 0.102118  | 1        | 868  | 24 | 0.0211861  |
| 0.0860215 | 1        | 760  | 18 | 0.0244787  |
| 0.117283  | 0.848562 | 1182 | 24 | 0.0130736  |
| 0.128422  | 1        | 1182 | 24 | 0.0130736  |
| 0.07      | 1        | 595  | 12 | 0.0486662  |
| 0.123176  | 1        | 1047 | 28 | 0.0342331  |
| 0.100235  | 1        | 852  | 24 | 0.0294222  |
| 0.0707426 | 1        | 604  | 11 | 0.0366342  |
| 0.0766048 | 1        | 685  | 15 | 0.0418778  |
| 0.066925  | 1        | 570  | 11 | 0.0368196  |
| 0.0708235 | 1        | 602  | 17 | 0.0433078  |
| 0.0726335 | 1        | 620  | 14 | 0.0381614  |
| 0.0670588 | 1        | 570  | 16 | 0.04427    |
| 0.0783266 | 1        | 674  | 17 | 0.0485073  |
| 0.0943529 | 1        | 802  | 21 | 0.0474656  |
| 0.129176  | 1        | 1098 | 31 | 0.0106107  |
| 0.0748235 | 0.995305 | 639  | 16 | 0.0314966  |
| 0.0796242 | 1        | 678  | 14 | 0.0469007  |
| 0.0967964 | 1        | 843  | 24 | 0.0424604  |
| 0.0801269 | 1        | 1010 | 27 | 0.0236931  |
| 0.0741176 | 1        | 630  | 16 | 0.0396709  |
| 0.0761176 | 1        | 647  | 18 | 0.0387264  |
| 0.0771765 | 1        | 656  | 18 | 0.0497696  |
| 0.0826021 | 1        | 706  | 20 | 0.0423457  |
| 0.0496909 | 1        | 828  | 22 | 0.0152363  |
| 0.0927059 | 1        | 788  | 22 | 0.0198178  |
| 0.0691676 | 1        | 590  | 14 | 0.0488251  |
| 0.0387229 | 1        | 547  | 15 | 0.0338447  |
| 0.143294  | 1        | 1218 | 31 | 0.0229781  |
| 0.0726375 | 1        | 618  | 14 | 0.0491252  |
| 0.0736471 | 1        | 626  | 11 | 0.0494342  |
| 0.118824  | 1        | 1010 | 21 | 0.0132325  |
| 0.0751234 | 1        | 639  | 17 | 0.0393443  |
| 0.0710588 | 1        | 604  | 17 | 0.0416395  |
| 0.0994118 | 1        | 845  | 24 | 0.00867746 |
| 0.106235  | 1        | 903  | 25 | 0.0229781  |
| 0.0531765 | 0.941667 | 480  | 14 | 0.034957   |
| 0.0692838 | 1        | 593  | 17 | 0.0425487  |
| 0.0750588 | 1        | 638  | 18 | 0.0439434  |
| 0.0867059 | 1        | 737  | 17 | 0.0486926  |
| 0.086     | 1        | 731  | 21 | 0.0340301  |
| 0.124619  | 1        | 1062 | 24 | 0.0168606  |
| 0.0876471 | 1        | 745  | 21 | 0.0295016  |
| 0.0734118 | 1        | 624  | 18 | 0.0371639  |

|           |           |      |    |            |
|-----------|-----------|------|----|------------|
| 0.132     | 1         | 1122 | 31 | 0.0152893  |
| 0.0103214 | 0.0949299 | 927  | 26 | 0.0350188  |
| 0.0881682 | 1         | 927  | 26 | 0.0350188  |
| 0.154235  | 1         | 1311 | 37 | 0.0122879  |
| 0.0720192 | 1         | 932  | 24 | 0.0148832  |
| 0.0872941 | 1         | 742  | 21 | 0.0228721  |
| 0.0731679 | 1         | 625  | 17 | 0.0484543  |
| 0.0773747 | 1         | 659  | 16 | 0.0270475  |
| 0.0756401 | 1         | 644  | 18 | 0.038082   |
| 0.141059  | 1         | 1199 | 33 | 0.0118642  |
| 0.0728235 | 1         | 619  | 18 | 0.0492135  |
| 0.0858824 | 1         | 730  | 21 | 0.0278067  |
| 0.0983535 | 1         | 896  | 25 | 0.0265002  |
| 0.0942733 | 1         | 912  | 23 | 0.0191822  |
| 0.0954515 | 1         | 1001 | 26 | 0.0330414  |
| 0.0776603 | 1         | 705  | 18 | 0.0407743  |
| 0.0678521 | 1         | 580  | 15 | 0.0334122  |
| 0.0739482 | 1         | 631  | 12 | 0.0425222  |
| 0.06      | 1         | 594  | 15 | 0.0450116  |
| 0.0709412 | 1         | 603  | 14 | 0.0270387  |
| 0.028626  | 1         | 584  | 16 | 0.0468565  |
| 0.0374001 | 1         | 763  | 20 | 0.0171166  |
| 0.0166085 | 1         | 562  | 16 | 0.0232517  |
| 0.0155742 | 1         | 527  | 15 | 0.0488339  |
| 0.0166085 | 1         | 562  | 16 | 0.0280539  |
| 0.0166085 | 1         | 562  | 16 | 0.0330767  |
| 0.0117915 | 1         | 399  | 12 | 0.045806   |
| 0.0795294 | 1         | 676  | 16 | 0.0463887  |
| 0.0747356 | 1         | 636  | 17 | 0.0466005  |
| 0.0757932 | 1         | 645  | 19 | 0.0334387  |
| 0.0488235 | 1         | 415  | 12 | 0.0414717  |
| 0.106706  | 1         | 907  | 17 | 0.0425575  |
| 0.07      | 1         | 595  | 12 | 0.0351512  |
| 0.0732941 | 1         | 623  | 18 | 0.0472891  |
| 0.0847059 | 1         | 720  | 17 | 0.030402   |
| 0.0699013 | 0.993322  | 599  | 16 | 0.0406508  |
| 0.0997647 | 1         | 848  | 18 | 0.0329796  |
| 0.0815294 | 1         | 693  | 20 | 0.047086   |
| 0.0775782 | 1         | 665  | 16 | 0.0340478  |
| 0.0647457 | 1         | 555  | 13 | 0.0214421  |
| 0.0830596 | 1         | 708  | 20 | 0.0140534  |
| 0.078     | 1         | 663  | 13 | 0.034242   |
| 0.0646048 | 1         | 846  | 23 | 0.0361134  |
| 0.0810588 | 1         | 689  | 18 | 0.0287424  |
| 0.104471  | 1         | 888  | 25 | 0.0299959  |
| 0.118712  | 1         | 1088 | 29 | 0.00723857 |
| 0.0788235 | 1         | 670  | 13 | 0.0356897  |

|           |          |      |    |           |
|-----------|----------|------|----|-----------|
| 0.10496   | 1        | 893  | 25 | 0.0202768 |
| 0.105529  | 1        | 897  | 25 | 0.023596  |
| 0.0718824 | 1        | 611  | 17 | 0.0497255 |
| 0.0557647 | 1        | 474  | 13 | 0.0483395 |
| 0.0745187 | 1        | 658  | 19 | 0.0407302 |
| 0.100471  | 1        | 854  | 21 | 0.0159513 |
| 0.0904817 | 1        | 943  | 27 | 0.0314966 |
| 0.0710934 | 1        | 606  | 11 | 0.0383556 |
| 0.0582353 | 1        | 495  | 14 | 0.0416924 |
| 0.0783486 | 1        | 668  | 13 | 0.0330061 |
| 0.139412  | 1        | 1185 | 30 | 0.0220953 |
| 0.0787651 | 1        | 671  | 19 | 0.0482778 |
| 0.0752941 | 1        | 640  | 18 | 0.0430783 |
| 0.0748307 | 1        | 641  | 16 | 0.0330767 |
| 0.0850591 | 1        | 727  | 20 | 0.0297046 |
| 0.0698824 | 1        | 594  | 17 | 0.0376759 |
| 0.0708235 | 1        | 602  | 12 | 0.03629   |
| 0.118947  | 1        | 1012 | 27 | 0.048984  |
| 0.111758  | 1        | 960  | 27 | 0.0223248 |
| 0.0827059 | 1        | 703  | 20 | 0.0352395 |
| 0.0699191 | 1        | 847  | 24 | 0.032141  |
| 0.069666  | 1        | 607  | 14 | 0.0493017 |
| 0.0877335 | 1        | 761  | 21 | 0.0350806 |
| 0.104725  | 1        | 962  | 25 | 0.0227574 |
| 0.0553015 | 1        | 508  | 14 | 0.0477304 |
| 0.128359  | 1        | 1094 | 25 | 0.0233929 |
| 0.101437  | 1        | 868  | 18 | 0.0414011 |
| 0.0749882 | 1        | 638  | 17 | 0.0406772 |
| 0.0661176 | 1        | 562  | 15 | 0.0492753 |
| 0.0930124 | 1        | 796  | 20 | 0.030861  |
| 0.0581176 | 1        | 494  | 12 | 0.0469007 |
| 0.0728235 | 1        | 619  | 18 | 0.0379407 |
| 0.0647606 | 0.702366 | 803  | 22 | 0.0350012 |
| 0.0938194 | 1        | 803  | 22 | 0.0350012 |
| 0.088     | 1        | 748  | 21 | 0.0233929 |
| 0.0687874 | 1        | 586  | 11 | 0.049646  |
| 0.0255487 | 0.528596 | 577  | 16 | 0.0365283 |
| 0.0517647 | 1        | 440  | 12 | 0.0310906 |
| 0.0812941 | 1        | 691  | 19 | 0.0349217 |
| 0.0721176 | 1        | 613  | 12 | 0.0478275 |
| 0.0763842 | 1        | 676  | 19 | 0.0428488 |
| 0.0918824 | 1        | 781  | 21 | 0.0319821 |
| 0.0204035 | 0.281201 | 633  | 18 | 0.044067  |
| 0.0984591 | 1        | 869  | 24 | 0.0341537 |
| 0.0738302 | 1        | 628  | 17 | 0.0361399 |
| 0.0613368 | 1        | 524  | 15 | 0.0447467 |
| 0.0930257 | 1        | 883  | 25 | 0.0352925 |

|           |          |      |    |            |
|-----------|----------|------|----|------------|
| 0.0768235 | 1        | 653  | 18 | 0.0296075  |
| 0.0745273 | 1        | 670  | 19 | 0.030349   |
| 0.0434986 | 1        | 372  | 11 | 0.0352395  |
| 0.141529  | 1        | 1203 | 34 | 0.0317173  |
| 0.0978501 | 1        | 842  | 22 | 0.0339065  |
| 0.0713362 | 1        | 607  | 17 | 0.0489133  |
| 0.11726   | 1        | 998  | 28 | 0.0242316  |
| 0.105499  | 1        | 942  | 21 | 0.0359722  |
| 0.10845   | 1        | 942  | 21 | 0.0359722  |
| 0.0710101 | 1        | 606  | 17 | 0.0467329  |
| 0.065969  | 1        | 561  | 16 | 0.0414541  |
| 0.0525771 | 0.389599 | 1173 | 28 | 0.01295    |
| 0.0667508 | 1        | 582  | 16 | 0.0423986  |
| 0.0988235 | 0.732345 | 1147 | 32 | 0.0209742  |
| 0.112824  | 1        | 959  | 22 | 0.00594975 |
| 0.0955294 | 0.627512 | 1294 | 34 | 0.0139916  |
| 0.0758711 | 1        | 699  | 13 | 0.0414452  |
| 0.105399  | 1        | 896  | 23 | 0.0130647  |
| 0.0568235 | 1        | 483  | 14 | 0.0273212  |
| 0.0696471 | 1        | 592  | 17 | 0.0395738  |
| 0.0714118 | 1        | 607  | 10 | 0.0431136  |
| 0.129822  | 1        | 1114 | 29 | 0.0117318  |
| 0.100353  | 1        | 853  | 15 | 0.0284335  |
| 0.0886249 | 1        | 776  | 16 | 0.0326354  |
| 0.0819252 | 1        | 703  | 20 | 0.0461062  |
| 0.0773844 | 1        | 658  | 16 | 0.0170195  |
| 0.0945882 | 1        | 804  | 23 | 0.0473244  |
| 0.07807   | 1        | 665  | 19 | 0.0105489  |
| 0.0257792 | 0.325926 | 675  | 16 | 0.0475009  |
| 0.0794118 | 1        | 675  | 16 | 0.0475009  |
| 0.12462   | 1        | 1066 | 30 | 0.0131795  |
| 0.0565483 | 1        | 481  | 12 | 0.0498932  |
| 0.0822353 | 1        | 699  | 16 | 0.034445   |
| 0.114904  | 1        | 993  | 28 | 0.0242227  |
| 0.0834801 | 1        | 711  | 20 | 0.0329178  |
| 0.132534  | 1        | 1128 | 26 | 0.0100987  |
| 0.120512  | 1        | 1027 | 27 | 0.0330944  |
| 0.108941  | 1        | 926  | 16 | 0.0333945  |
| 0.0921161 | 1        | 784  | 22 | 0.0354867  |
| 0.101882  | 1        | 866  | 20 | 0.0172843  |



| Fraction of negatively enriched windows in region | MAT-score on T(H3K14acHETC vs. control) |
|---------------------------------------------------|-----------------------------------------|
| 0                                                 | 5.82468                                 |
| 0                                                 | 6.01728                                 |
| 0                                                 | 8.3346                                  |
| 0                                                 | 7.00851                                 |
| 0                                                 | 6.14668                                 |
| 0                                                 | 7.48466                                 |
| 0                                                 | 6.0122                                  |
| 0                                                 | 6.06167                                 |
| 0                                                 | 5.40919                                 |
| 0                                                 | 6.00703                                 |
| 0                                                 | 5.36987                                 |
| 0                                                 | 5.56545                                 |
| 0                                                 | 6.35676                                 |
| 0                                                 | 6.98616                                 |
| 0                                                 | 5.68566                                 |
| 0                                                 | 7.04639                                 |
| 0                                                 | 5.42045                                 |
| 0                                                 | 6.17804                                 |
| 0                                                 | 6.02103                                 |
| 0                                                 | 6.4238                                  |
| 0                                                 | 5.43018                                 |
| 0                                                 | 7.37244                                 |
| 0                                                 | 5.5694                                  |
| 0                                                 | 5.40482                                 |
| 0                                                 | 6.45994                                 |
| 0                                                 | 5.2966                                  |
| 0                                                 | 6.13154                                 |
| 0                                                 | 5.27566                                 |
| 0                                                 | 5.58911                                 |
| 0                                                 | 6.08942                                 |
| 0                                                 | 5.91019                                 |
| 0                                                 | 5.32409                                 |
| 0                                                 | 5.53275                                 |
| 0                                                 | 6.16269                                 |
| 0                                                 | 7.07242                                 |
| 0                                                 | 6.07751                                 |
| 0                                                 | 6.22212                                 |
| 0                                                 | 5.29471                                 |
| 0                                                 | 5.52145                                 |
| 0                                                 | 6.10616                                 |
| 0                                                 | 7.51785                                 |
| 0                                                 | 7.89065                                 |
| 0                                                 | 5.58244                                 |
| 0                                                 | 5.58244                                 |

|   |         |
|---|---------|
| 0 | 5.4312  |
| 0 | 5.93048 |
| 0 | 7.1302  |
| 0 | 5.8256  |
| 0 | 5.87838 |
| 0 | 5.25537 |
| 0 | 5.48177 |
| 0 | 5.2855  |
| 0 | 5.2666  |
| 0 | 6.0071  |
| 0 | 5.82709 |
| 0 | 9.57798 |
| 0 | 6.07119 |
| 0 | 7.26    |
| 0 | 5.84701 |
| 0 | 5.51043 |
| 0 | 6.20373 |
| 0 | 6.20373 |
| 0 | 6.41528 |
| 0 | 5.4922  |
| 0 | 5.4922  |
| 0 | 5.49326 |
| 0 | 5.35896 |
| 0 | 6.27412 |
| 0 | 10.8644 |
| 0 | 6.0738  |
| 0 | 5.34135 |
| 0 | 5.3351  |
| 0 | 5.3351  |
| 0 | 7.37249 |
| 0 | 5.30428 |
| 0 | 6.27618 |
| 0 | 5.51761 |
| 0 | 6.14869 |
| 0 | 6.03013 |
| 0 | 7.10379 |
| 0 | 7.01022 |
| 0 | 5.28767 |
| 0 | 6.23326 |
| 0 | 5.37372 |
| 0 | 6.15537 |
| 0 | 6.53566 |
| 0 | 7.85538 |
| 0 | 8.0315  |
| 0 | 5.54397 |
| 0 | 6.0395  |
| 0 | 6.30927 |

|   |         |
|---|---------|
| 0 | 6.30118 |
| 0 | 5.47052 |
| 0 | 5.53974 |
| 0 | 5.50546 |
| 0 | 9.0552  |
| 0 | 6.55384 |
| 0 | 8.53056 |
| 0 | 5.38894 |
| 0 | 6.80781 |
| 0 | 7.12081 |
| 0 | 5.34358 |
| 0 | 5.45464 |
| 0 | 5.46126 |
| 0 | 5.55287 |
| 0 | 7.10108 |
| 0 | 9.00676 |
| 0 | 5.69263 |
| 0 | 5.65685 |
| 0 | 7.16786 |
| 0 | 5.27507 |
| 0 | 8.00373 |
| 0 | 6.88986 |
| 0 | 5.47738 |
| 0 | 5.47738 |
| 0 | 5.50861 |
| 0 | 5.32198 |
| 0 | 5.28874 |
| 0 | 7.74201 |
| 0 | 5.77168 |
| 0 | 5.34134 |
| 0 | 5.59845 |
| 0 | 6.43615 |
| 0 | 5.32144 |
| 0 | 5.57408 |
| 0 | 7.30173 |
| 0 | 7.30173 |
| 0 | 5.73237 |
| 0 | 5.73237 |
| 0 | 8.07841 |
| 0 | 5.26524 |
| 0 | 9.05844 |
| 0 | 5.64642 |
| 0 | 5.64642 |
| 0 | 5.48151 |
| 0 | 5.25785 |
| 0 | 5.33385 |
| 0 | 6.17857 |

|   |         |
|---|---------|
| 0 | 6.37755 |
| 0 | 6.1694  |
| 0 | 6.01462 |
| 0 | 7.36168 |
| 0 | 6.05487 |
| 0 | 5.37872 |
| 0 | 6.54323 |
| 0 | 6.54323 |
| 0 | 8.20909 |
| 0 | 7.05023 |
| 0 | 5.30465 |
| 0 | 5.36683 |
| 0 | 5.51743 |
| 0 | 5.44297 |
| 0 | 6.43964 |
| 0 | 5.47545 |
| 0 | 5.33334 |
| 0 | 6.08353 |
| 0 | 5.61203 |
| 0 | 5.65849 |
| 0 | 5.55244 |
| 0 | 5.4165  |
| 0 | 6.06484 |
| 0 | 11.0468 |
| 0 | 5.68311 |
| 0 | 6.29318 |
| 0 | 8.36147 |
| 0 | 8.36147 |
| 0 | 13.722  |
| 0 | 5.87534 |
| 0 | 5.49885 |
| 0 | 11.66   |
| 0 | 5.38393 |
| 0 | 5.59433 |
| 0 | 7.0138  |
| 0 | 5.30046 |
| 0 | 5.55771 |
| 0 | 8.82947 |
| 0 | 7.64446 |
| 0 | 5.26222 |
| 0 | 6.11843 |
| 0 | 5.65404 |
| 0 | 5.40728 |
| 0 | 8.56081 |
| 0 | 6.42459 |
| 0 | 8.31632 |
| 0 | 5.54696 |

|   |         |
|---|---------|
| 0 | 5.43593 |
| 0 | 7.01962 |
| 0 | 7.04742 |
| 0 | 5.52411 |
| 0 | 6.06382 |
| 0 | 6.38801 |
| 0 | 6.26683 |
| 0 | 5.39166 |
| 0 | 6.33217 |
| 0 | 7.32067 |
| 0 | 6.36006 |
| 0 | 5.29467 |
| 0 | 6.12845 |
| 0 | 5.99644 |
| 0 | 7.21902 |
| 0 | 9.07948 |
| 0 | 7.74708 |
| 0 | 11.3361 |
| 0 | 6.24061 |
| 0 | 5.37708 |
| 0 | 5.37708 |
| 0 | 5.73624 |
| 0 | 5.47644 |
| 0 | 5.3743  |
| 0 | 6.52031 |
| 0 | 6.04587 |
| 0 | 8.51284 |
| 0 | 5.31367 |
| 0 | 6.16989 |
| 0 | 9.39012 |
| 0 | 10.5533 |
| 0 | 5.2741  |
| 0 | 5.36734 |
| 0 | 6.03989 |
| 0 | 6.20693 |
| 0 | 5.97172 |
| 0 | 6.66341 |
| 0 | 6.15867 |
| 0 | 5.25438 |
| 0 | 7.22097 |
| 0 | 5.32731 |
| 0 | 6.52409 |
| 0 | 5.93222 |
| 0 | 5.93222 |
| 0 | 6.32458 |
| 0 | 8.20057 |
| 0 | 5.86657 |

|   |         |
|---|---------|
| 0 | 6.07331 |
| 0 | 5.26534 |
| 0 | 6.02348 |
| 0 | 5.58265 |
| 0 | 7.08359 |
| 0 | 6.31626 |
| 0 | 6.07069 |
| 0 | 6.07069 |
| 0 | 6.93741 |
| 0 | 5.4862  |
| 0 | 5.38147 |
| 0 | 6.1132  |
| 0 | 6.37606 |
| 0 | 7.51216 |
| 0 | 5.39497 |
| 0 | 5.26262 |
| 0 | 5.73434 |
| 0 | 5.52309 |
| 0 | 5.42023 |
| 0 | 7.11697 |
| 0 | 7.04071 |
| 0 | 6.20713 |
| 0 | 5.80876 |
| 0 | 5.27082 |
| 0 | 5.51259 |
| 0 | 7.24793 |
| 0 | 6.15383 |
| 0 | 5.50145 |
| 0 | 5.34283 |
| 0 | 7.31856 |
| 0 | 7.79166 |
| 0 | 9.39347 |
| 0 | 6.57985 |
| 0 | 6.75979 |
| 0 | 5.5326  |
| 0 | 7.3928  |
| 0 | 5.29857 |
| 0 | 5.84854 |
| 0 | 7.03833 |
| 0 | 6.24758 |
| 0 | 6.06965 |
| 0 | 5.92384 |
| 0 | 8.75252 |
| 0 | 5.49417 |
| 0 | 5.6176  |
| 0 | 5.28065 |
| 0 | 7.12457 |

|   |         |
|---|---------|
| 0 | 5.41293 |
| 0 | 6.03064 |
| 0 | 5.47068 |
| 0 | 8.0738  |
| 0 | 6.2283  |
| 0 | 7.11255 |
| 0 | 5.91771 |
| 0 | 7.11995 |
| 0 | 5.67992 |
| 0 | 5.31755 |
| 0 | 5.29891 |
| 0 | 5.44659 |
| 0 | 5.36669 |
| 0 | 10.1893 |
| 0 | 5.26703 |
| 0 | 10.171  |
| 0 | 6.16931 |
| 0 | 6.72251 |
| 0 | 5.43881 |
| 0 | 5.25819 |
| 0 | 6.0414  |
| 0 | 5.27772 |
| 0 | 5.2797  |
| 0 | 7.12541 |
| 0 | 5.26807 |
| 0 | 5.72597 |
| 0 | 5.72597 |
| 0 | 5.69709 |
| 0 | 5.26356 |
| 0 | 5.61958 |
| 0 | 7.45012 |
| 0 | 5.5812  |
| 0 | 6.14055 |
| 0 | 6.00444 |
| 0 | 5.4228  |
| 0 | 6.76833 |
| 0 | 6.12801 |
| 0 | 7.18003 |
| 0 | 6.39026 |
| 0 | 5.37789 |
| 0 | 9.10056 |
| 0 | 6.01043 |
| 0 | 17.1656 |
| 0 | 5.35327 |
| 0 | 5.38119 |
| 0 | 5.53483 |
| 0 | 6.12044 |

|   |         |
|---|---------|
| 0 | 6.04938 |
| 0 | 9.61365 |
| 0 | 5.39305 |
| 0 | 14.3214 |
| 0 | 6.09281 |
| 0 | 5.51777 |
| 0 | 6.40393 |
| 0 | 5.2691  |
| 0 | 5.60968 |
| 0 | 5.60064 |
| 0 | 5.58788 |
| 0 | 5.43288 |
| 0 | 5.77992 |
| 0 | 6.00541 |
| 0 | 6.08699 |
| 0 | 6.06595 |
| 0 | 5.62733 |
| 0 | 5.31777 |
| 0 | 5.38622 |
| 0 | 5.88034 |
| 0 | 6.62551 |
| 0 | 8.15668 |
| 0 | 5.69724 |
| 0 | 5.69724 |
| 0 | 5.32204 |
| 0 | 5.41307 |
| 0 | 5.26979 |
| 0 | 6.69604 |
| 0 | 5.34186 |
| 0 | 6.18832 |
| 0 | 5.28008 |
| 0 | 6.66121 |
| 0 | 5.98918 |
| 0 | 5.39717 |
| 0 | 8.32259 |
| 0 | 5.30324 |
| 0 | 5.39291 |
| 0 | 6.17588 |
| 0 | 6.17588 |
| 0 | 6.63483 |
| 0 | 5.96666 |
| 0 | 5.47337 |
| 0 | 8.34983 |
| 0 | 8.34983 |
| 0 | 6.59068 |
| 0 | 5.29189 |
| 0 | 5.26686 |



|   |         |
|---|---------|
| 0 | 7.13553 |
| 0 | 5.43626 |
| 0 | 6.17813 |
| 0 | 6.17813 |
| 0 | 5.25202 |
| 0 | 7.55088 |
| 0 | 7.34172 |
| 0 | 7.02616 |
| 0 | 6.11817 |
| 0 | 5.43437 |
| 0 | 6.05489 |
| 0 | 5.55514 |
| 0 | 7.2561  |
| 0 | 6.33573 |
| 0 | 6.33573 |
| 0 | 5.27892 |
| 0 | 5.40306 |
| 0 | 5.2535  |
| 0 | 7.30821 |
| 0 | 7.30821 |
| 0 | 5.27156 |
| 0 | 5.63216 |
| 0 | 5.58741 |
| 0 | 7.30857 |
| 0 | 5.50582 |
| 0 | 6.45456 |
| 0 | 6.02669 |
| 0 | 5.59477 |
| 0 | 7.73071 |
| 0 | 5.36406 |
| 0 | 5.45218 |
| 0 | 5.46908 |
| 0 | 5.59353 |
| 0 | 5.33197 |
| 0 | 8.21444 |
| 0 | 7.11442 |
| 0 | 5.25106 |
| 0 | 5.37467 |
| 0 | 5.2742  |
| 0 | 6.26479 |
| 0 | 5.3589  |
| 0 | 7.41884 |
| 0 | 7.1818  |
| 0 | 5.62653 |
| 0 | 5.4238  |
| 0 | 5.33814 |
| 0 | 10.0248 |

|   |         |
|---|---------|
| 0 | 5.3175  |
| 0 | 5.39366 |
| 0 | 7.8465  |
| 0 | 6.34791 |
| 0 | 6.30243 |
| 0 | 5.25375 |
| 0 | 7.87744 |
| 0 | 7.17441 |
| 0 | 5.7472  |
| 0 | 6.16758 |
| 0 | 6.1284  |
| 0 | 5.55656 |
| 0 | 5.43364 |
| 0 | 5.88365 |
| 0 | 6.18143 |
| 0 | 8.43898 |
| 0 | 7.20775 |
| 0 | 7.38124 |
| 0 | 6.52159 |
| 0 | 6.52159 |
| 0 | 7.74592 |
| 0 | 7.07514 |
| 0 | 6.57266 |
| 0 | 5.30413 |
| 0 | 5.42928 |
| 0 | 9.72852 |
| 0 | 7.02265 |
| 0 | 6.13502 |
| 0 | 5.88754 |
| 0 | 5.42995 |
| 0 | 6.31762 |
| 0 | 9.34136 |
| 0 | 6.11171 |
| 0 | 7.86763 |
| 0 | 5.48936 |
| 0 | 5.27293 |
| 0 | 7.11581 |
| 0 | 5.31099 |
| 0 | 9.7029  |
| 0 | 5.90001 |
| 0 | 6.04308 |
| 0 | 6.03211 |
| 0 | 6.07932 |
| 0 | 5.69229 |
| 0 | 5.31991 |
| 0 | 6.16329 |
| 0 | 5.34087 |

|   |         |
|---|---------|
| 0 | 7.06433 |
| 0 | 6.0843  |
| 0 | 5.69436 |
| 0 | 8.5768  |
| 0 | 6.08063 |
| 0 | 5.45998 |
| 0 | 5.39156 |
| 0 | 7.09293 |
| 0 | 8.01379 |
| 0 | 5.89687 |
| 0 | 7.70929 |
| 0 | 5.4037  |
| 0 | 5.26382 |
| 0 | 8.90591 |
| 0 | 7.11584 |
| 0 | 5.65087 |
| 0 | 5.34339 |
| 0 | 7.08521 |
| 0 | 5.26946 |
| 0 | 5.36439 |
| 0 | 7.14112 |
| 0 | 6.0804  |
| 0 | 5.35657 |
| 0 | 5.46351 |
| 0 | 5.5653  |
| 0 | 11.3764 |
| 0 | 5.4687  |
| 0 | 5.78392 |
| 0 | 5.59342 |
| 0 | 5.46928 |
| 0 | 10.8758 |
| 0 | 6.45617 |
| 0 | 6.15703 |
| 0 | 5.45108 |
| 0 | 6.3774  |
| 0 | 5.54359 |
| 0 | 5.61133 |
| 0 | 6.07384 |
| 0 | 6.45923 |
| 0 | 6.03805 |
| 0 | 5.39405 |
| 0 | 5.27463 |
| 0 | 5.34763 |
| 0 | 5.34763 |
| 0 | 7.43909 |
| 0 | 5.53298 |
| 0 | 5.80559 |

|   |         |
|---|---------|
| 0 | 5.53876 |
| 0 | 7.16728 |
| 0 | 6.02782 |
| 0 | 5.51222 |
| 0 | 5.52295 |
| 0 | 11.661  |
| 0 | 5.32728 |
| 0 | 8.81643 |
| 0 | 6.51807 |
| 0 | 6.2445  |
| 0 | 8.10513 |
| 0 | 5.58609 |
| 0 | 6.39525 |
| 0 | 9.23024 |
| 0 | 5.73219 |
| 0 | 6.62974 |
| 0 | 8.4763  |
| 0 | 5.51791 |
| 0 | 6.93966 |
| 0 | 5.77351 |
| 0 | 5.491   |
| 0 | 5.491   |
| 0 | 9.32167 |
| 0 | 6.03997 |
| 0 | 7.19027 |
| 0 | 5.33912 |
| 0 | 6.22157 |
| 0 | 5.77679 |
| 0 | 7.09363 |
| 0 | 7.13151 |
| 0 | 5.51312 |
| 0 | 5.32203 |
| 0 | 5.4252  |
| 0 | 8.11037 |
| 0 | 5.90365 |
| 0 | 6.00907 |
| 0 | 5.41089 |
| 0 | 5.31718 |
| 0 | 8.03409 |
| 0 | 6.52854 |
| 0 | 5.61493 |
| 0 | 5.3147  |
| 0 | 6.24248 |
| 0 | 6.31447 |
| 0 | 5.25604 |
| 0 | 8.49127 |
| 0 | 5.29288 |

|   |         |
|---|---------|
| 0 | 6.32845 |
| 0 | 5.72978 |
| 0 | 6.51031 |
| 0 | 5.25179 |
| 0 | 5.33422 |
| 0 | 5.85106 |
| 0 | 6.10992 |
| 0 | 7.02344 |
| 0 | 7.16645 |
| 0 | 6.22606 |
| 0 | 6.51497 |
| 0 | 6.15415 |
| 0 | 6.72742 |
| 0 | 5.29639 |
| 0 | 5.29639 |
| 0 | 6.37946 |
| 0 | 6.29837 |
| 0 | 7.27023 |
| 0 | 7.18097 |
| 0 | 5.53489 |
| 0 | 6.18742 |
| 0 | 6.52039 |
| 0 | 5.29645 |
| 0 | 6.04635 |
| 0 | 5.57225 |
| 0 | 5.50591 |
| 0 | 5.55385 |
| 0 | 5.64333 |
| 0 | 5.27796 |
| 0 | 7.00573 |
| 0 | 5.37563 |
| 0 | 7.02976 |
| 0 | 5.25666 |
| 0 | 8.15212 |
| 0 | 6.82836 |
| 0 | 5.30928 |
| 0 | 7.17509 |
| 0 | 5.97698 |
| 0 | 9.15522 |
| 0 | 7.73664 |
| 0 | 5.32741 |
| 0 | 7.14145 |
| 0 | 5.5683  |
| 0 | 6.14569 |
| 0 | 5.42583 |
| 0 | 5.54493 |
| 0 | 6.15187 |

|   |         |
|---|---------|
| 0 | 7.58856 |
| 0 | 8.31938 |
| 0 | 5.44181 |
| 0 | 5.6065  |
| 0 | 5.32516 |
| 0 | 5.28533 |
| 0 | 6.1681  |
| 0 | 7.65872 |
| 0 | 7.65872 |
| 0 | 6.4877  |
| 0 | 6.36062 |
| 0 | 5.35276 |
| 0 | 7.09063 |
| 0 | 5.42273 |
| 0 | 5.43252 |
| 0 | 7.49241 |
| 0 | 5.71919 |
| 0 | 6.25601 |
| 0 | 5.32863 |
| 0 | 6.28123 |
| 0 | 5.49923 |
| 0 | 6.50806 |
| 0 | 6.38992 |
| 0 | 5.51266 |
| 0 | 5.56269 |
| 0 | 7.06736 |
| 0 | 5.47195 |
| 0 | 6.47724 |
| 0 | 5.29081 |
| 0 | 5.63443 |
| 0 | 6.74109 |
| 0 | 5.54656 |
| 0 | 6.65072 |
| 0 | 5.27376 |
| 0 | 6.23898 |
| 0 | 5.47396 |
| 0 | 5.72995 |
| 0 | 7.36317 |
| 0 | 5.3539  |
| 0 | 5.25178 |
| 0 | 5.53105 |
| 0 | 7.05432 |
| 0 | 5.41144 |
| 0 | 5.40268 |
| 0 | 7.43257 |
| 0 | 7.31011 |
| 0 | 7.12307 |

|   |         |
|---|---------|
| 0 | 6.16364 |
| 0 | 5.26008 |
| 0 | 6.04293 |
| 0 | 5.62744 |
| 0 | 6.0032  |
| 0 | 5.44122 |
| 0 | 7.37002 |
| 0 | 5.48186 |
| 0 | 7.41155 |
| 0 | 8.52088 |
| 0 | 6.83083 |
| 0 | 6.51369 |
| 0 | 5.36248 |
| 0 | 5.36248 |
| 0 | 5.7725  |
| 0 | 5.37083 |
| 0 | 5.59682 |
| 0 | 7.35637 |
| 0 | 6.01703 |
| 0 | 5.43235 |
| 0 | 6.09868 |
| 0 | 6.25801 |
| 0 | 5.49062 |
| 0 | 5.49062 |
| 0 | 5.75317 |
| 0 | 9.16775 |
| 0 | 5.34115 |
| 0 | 6.56487 |
| 0 | 6.02385 |
| 0 | 5.42559 |
| 0 | 5.5021  |
| 0 | 7.19176 |
| 0 | 6.05893 |
| 0 | 5.46558 |
| 0 | 6.35934 |
| 0 | 7.38618 |
| 0 | 6.7571  |
| 0 | 7.21865 |
| 0 | 5.4907  |
| 0 | 5.42295 |
| 0 | 7.63699 |
| 0 | 9.97137 |
| 0 | 6.52508 |
| 0 | 5.6487  |
| 0 | 6.02321 |
| 0 | 5.49065 |
| 0 | 7.96358 |

|   |         |
|---|---------|
| 0 | 7.30319 |
| 0 | 7.83233 |
| 0 | 10.4418 |
| 0 | 6.18125 |
| 0 | 5.35075 |
| 0 | 6.77839 |
| 0 | 5.97686 |
| 0 | 5.97686 |
| 0 | 5.28704 |
| 0 | 9.07262 |
| 0 | 5.34044 |
| 0 | 7.14547 |
| 0 | 8.03077 |
| 0 | 5.45366 |
| 0 | 6.13571 |
| 0 | 7.21094 |
| 0 | 5.71484 |
| 0 | 11.16   |
| 0 | 6.17667 |
| 0 | 5.6939  |
| 0 | 5.96477 |
| 0 | 6.35779 |
| 0 | 6.03022 |
| 0 | 6.37262 |
| 0 | 5.53028 |
| 0 | 5.91694 |
| 0 | 5.73981 |
| 0 | 5.38908 |
| 0 | 8.34038 |
| 0 | 5.93622 |
| 0 | 6.00561 |
| 0 | 6.65076 |
| 0 | 6.70842 |
| 0 | 6.34949 |
| 0 | 6.04997 |
| 0 | 5.60819 |
| 0 | 5.60819 |
| 0 | 5.51286 |
| 0 | 5.84768 |
| 0 | 5.54404 |
| 0 | 5.68785 |
| 0 | 7.48742 |
| 0 | 7.60152 |
| 0 | 7.00015 |
| 0 | 5.90591 |
| 0 | 5.55402 |
| 0 | 6.14776 |



|   |         |
|---|---------|
| 0 | 6.43305 |
| 0 | 5.33944 |
| 0 | 6.75787 |
| 0 | 9.11006 |
| 0 | 6.99511 |
| 0 | 6.18173 |
| 0 | 5.62251 |
| 0 | 8.2187  |
| 0 | 5.96483 |
| 0 | 6.07841 |
| 0 | 8.62602 |
| 0 | 5.81035 |
| 0 | 5.42299 |
| 0 | 6.04644 |
| 0 | 8.16701 |
| 0 | 5.52573 |
| 0 | 7.47595 |
| 0 | 5.36369 |
| 0 | 6.0294  |
| 0 | 6.40781 |
| 0 | 5.4225  |
| 0 | 6.1091  |
| 0 | 5.81098 |
| 0 | 5.85857 |
| 0 | 6.07074 |
| 0 | 5.32617 |
| 0 | 15.9113 |
| 0 | 5.5347  |
| 0 | 8.7201  |
| 0 | 6.79596 |
| 0 | 9.0571  |
| 0 | 7.27167 |
| 0 | 6.01215 |
| 0 | 6.06807 |
| 0 | 6.1591  |
| 0 | 7.34375 |
| 0 | 6.53792 |
| 0 | 6.1477  |
| 0 | 5.549   |
| 0 | 5.28134 |
| 0 | 5.41913 |
| 0 | 6.61151 |
| 0 | 6.71837 |
| 0 | 5.28506 |
| 0 | 5.5411  |
| 0 | 5.33828 |
| 0 | 5.30342 |

|   |         |
|---|---------|
| 0 | 6.00157 |
| 0 | 6.71721 |
| 0 | 6.12441 |
| 0 | 9.22423 |
| 0 | 9.18281 |
| 0 | 6.48546 |
| 0 | 6.16238 |
| 0 | 8.10263 |
| 0 | 8.52687 |
| 0 | 8.50055 |
| 0 | 6.33671 |
| 0 | 6.12422 |
| 0 | 5.34077 |
| 0 | 5.42013 |
| 0 | 5.35535 |
| 0 | 5.36323 |
| 0 | 7.0353  |
| 0 | 7.30028 |
| 0 | 5.3544  |
| 0 | 12.1479 |
| 0 | 5.32612 |
| 0 | 5.28097 |
| 0 | 5.6997  |
| 0 | 5.76741 |
| 0 | 5.82739 |
| 0 | 5.60074 |
| 0 | 6.41716 |
| 0 | 8.21445 |
| 0 | 5.30546 |
| 0 | 5.37738 |
| 0 | 6.17186 |
| 0 | 5.60442 |
| 0 | 6.09289 |
| 0 | 7.01193 |
| 0 | 5.4019  |
| 0 | 6.12524 |
| 0 | 5.28836 |
| 0 | 5.91669 |
| 0 | 5.47101 |
| 0 | 5.48928 |
| 0 | 5.33735 |
| 0 | 6.00345 |
| 0 | 6.29692 |
| 0 | 5.53231 |
| 0 | 5.29134 |
| 0 | 6.46944 |
| 0 | 6.07923 |

|   |         |
|---|---------|
| 0 | 8.61053 |
| 0 | 5.34034 |
| 0 | 5.2518  |
| 0 | 5.25993 |
| 0 | 7.03398 |
| 0 | 5.47736 |
| 0 | 5.2553  |
| 0 | 7.05406 |
| 0 | 6.07812 |
| 0 | 5.54994 |
| 0 | 5.58164 |
| 0 | 7.29715 |
| 0 | 7.61203 |
| 0 | 5.37234 |
| 0 | 6.95303 |
| 0 | 6.58983 |
| 0 | 5.55292 |
| 0 | 5.68121 |
| 0 | 5.66174 |
| 0 | 5.46295 |
| 0 | 7.80145 |
| 0 | 6.3675  |
| 0 | 6.49103 |
| 0 | 6.06045 |
| 0 | 6.22572 |
| 0 | 5.40119 |
| 0 | 6.0435  |
| 0 | 6.26918 |
| 0 | 6.77964 |
| 0 | 5.65565 |
| 0 | 5.38073 |
| 0 | 5.30131 |
| 0 | 8.23077 |
| 0 | 5.30044 |
| 0 | 5.28835 |
| 0 | 5.38424 |
| 0 | 5.37074 |
| 0 | 5.4372  |
| 0 | 6.59971 |
| 0 | 7.073   |
| 0 | 7.21528 |
| 0 | 5.78946 |
| 0 | 5.28183 |
| 0 | 6.11363 |
| 0 | 5.3058  |
| 0 | 5.53728 |
| 0 | 5.41014 |

|   |         |
|---|---------|
| 0 | 6.09832 |
| 0 | 6.29989 |
| 0 | 5.36817 |
| 0 | 5.46718 |
| 0 | 5.47303 |
| 0 | 5.25754 |
| 0 | 5.34168 |
| 0 | 7.7206  |
| 0 | 6.44389 |
| 0 | 5.35804 |
| 0 | 6.33767 |
| 0 | 5.48289 |
| 0 | 6.82497 |
| 0 | 5.41045 |
| 0 | 5.55798 |
| 0 | 6.39879 |
| 0 | 7.18292 |
| 0 | 5.59362 |
| 0 | 7.1263  |
| 0 | 5.25418 |
| 0 | 5.76243 |
| 0 | 5.65474 |
| 0 | 5.65474 |
| 0 | 5.53083 |
| 0 | 5.31729 |
| 0 | 6.09974 |
| 0 | 5.67692 |
| 0 | 5.63766 |
| 0 | 5.4352  |
| 0 | 5.74166 |
| 0 | 5.40927 |
| 0 | 5.71926 |
| 0 | 5.25347 |
| 0 | 7.46827 |
| 0 | 6.0665  |
| 0 | 5.32053 |
| 0 | 5.37242 |
| 0 | 5.37156 |
| 0 | 7.17631 |
| 0 | 5.71951 |
| 0 | 6.04041 |
| 0 | 5.31529 |
| 0 | 5.96949 |
| 0 | 6.45627 |
| 0 | 10.1567 |
| 0 | 6.46924 |
| 0 | 5.30912 |

|   |         |
|---|---------|
| 0 | 6.22893 |
| 0 | 6.48072 |
| 0 | 5.3894  |
| 0 | 6.27578 |
| 0 | 8.07359 |
| 0 | 5.27964 |
| 0 | 5.65486 |
| 0 | 5.25541 |
| 0 | 5.74406 |
| 0 | 6.22388 |
| 0 | 6.22388 |
| 0 | 5.44289 |
| 0 | 5.34253 |
| 0 | 5.50068 |
| 0 | 5.54517 |
| 0 | 5.36933 |
| 0 | 5.4372  |
| 0 | 6.14221 |
| 0 | 7.41095 |
| 0 | 8.35814 |
| 0 | 5.38203 |
| 0 | 7.38868 |
| 0 | 6.10967 |
| 0 | 5.29218 |
| 0 | 5.70578 |
| 0 | 6.02806 |
| 0 | 5.64047 |
| 0 | 7.352   |
| 0 | 6.24202 |
| 0 | 5.34855 |
| 0 | 5.41108 |
| 0 | 6.42884 |
| 0 | 6.46042 |
| 0 | 5.79205 |
| 0 | 6.20715 |
| 0 | 9.33575 |
| 0 | 5.73957 |
| 0 | 8.34089 |
| 0 | 11.0875 |
| 0 | 6.28921 |
| 0 | 6.65449 |
| 0 | 5.26841 |
| 0 | 5.47693 |
| 0 | 6.07584 |
| 0 | 6.34769 |
| 0 | 5.50469 |
| 0 | 7.06742 |

|   |         |
|---|---------|
| 0 | 5.41945 |
| 0 | 6.0953  |
| 0 | 9.10221 |
| 0 | 6.16822 |
| 0 | 5.31158 |
| 0 | 6.0721  |
| 0 | 6.03577 |
| 0 | 6.19937 |
| 0 | 5.56527 |
| 0 | 8.0184  |
| 0 | 5.27974 |
| 0 | 5.45224 |
| 0 | 6.10779 |
| 0 | 6.20273 |
| 0 | 5.58024 |
| 0 | 6.46601 |
| 0 | 6.09604 |
| 0 | 5.51356 |
| 0 | 6.36019 |
| 0 | 5.42464 |
| 0 | 5.30702 |
| 0 | 5.35412 |
| 0 | 5.61348 |
| 0 | 9.3242  |
| 0 | 5.41279 |
| 0 | 6.46934 |
| 0 | 9.06283 |
| 0 | 9.06283 |
| 0 | 5.37214 |
| 0 | 5.37214 |
| 0 | 6.09358 |
| 0 | 5.58513 |
| 0 | 7.05797 |
| 0 | 12.1867 |
| 0 | 5.75676 |
| 0 | 5.44795 |
| 0 | 9.24556 |
| 0 | 5.29147 |
| 0 | 5.62724 |
| 0 | 8.08745 |
| 0 | 5.59949 |
| 0 | 7.77661 |
| 0 | 6.60629 |
| 0 | 6.20611 |
| 0 | 5.29636 |
| 0 | 6.97766 |
| 0 | 6.12951 |

|   |         |
|---|---------|
| 0 | 8.52621 |
| 0 | 5.51391 |
| 0 | 5.39123 |
| 0 | 9.46153 |
| 0 | 5.48046 |
| 0 | 6.03126 |
| 0 | 9.77125 |
| 0 | 5.40581 |
| 0 | 5.27473 |
| 0 | 6.05533 |
| 0 | 6.20468 |
| 0 | 7.45639 |
| 0 | 8.12115 |
| 0 | 6.02456 |
| 0 | 5.58447 |
| 0 | 6.33003 |
| 0 | 6.02231 |
| 0 | 6.063   |
| 0 | 7.18195 |
| 0 | 6.79776 |
| 0 | 7.60682 |
| 0 | 7.08658 |
| 0 | 8.41589 |
| 0 | 5.44399 |
| 0 | 6.52572 |
| 0 | 5.36459 |
| 0 | 5.79938 |
| 0 | 5.39305 |
| 0 | 5.90828 |
| 0 | 5.27979 |
| 0 | 5.44515 |
| 0 | 6.483   |
| 0 | 5.45385 |
| 0 | 6.24932 |
| 0 | 8.09229 |
| 0 | 8.09229 |
| 0 | 8.0862  |
| 0 | 5.73825 |
| 0 | 5.73825 |
| 0 | 5.57161 |
| 0 | 5.30193 |
| 0 | 5.36234 |
| 0 | 6.15937 |
| 0 | 6.16222 |
| 0 | 6.00335 |
| 0 | 5.47528 |
| 0 | 5.28557 |

|   |         |
|---|---------|
| 0 | 5.32159 |
| 0 | 5.94259 |
| 0 | 5.40383 |
| 0 | 6.06649 |
| 0 | 7.06036 |
| 0 | 5.58108 |
| 0 | 6.01498 |
| 0 | 5.5882  |
| 0 | 5.61    |
| 0 | 5.53603 |
| 0 | 7.07069 |
| 0 | 6.18626 |
| 0 | 5.38374 |
| 0 | 6.60661 |
| 0 | 6.25074 |
| 0 | 5.53135 |
| 0 | 6.30345 |
| 0 | 6.30345 |
| 0 | 5.52808 |
| 0 | 5.7707  |
| 0 | 6.3852  |
| 0 | 5.36402 |
| 0 | 6.05592 |
| 0 | 5.61752 |
| 0 | 5.46458 |
| 0 | 5.33552 |
| 0 | 5.41499 |
| 0 | 5.45228 |
| 0 | 5.5102  |
| 0 | 5.5102  |
| 0 | 5.6477  |
| 0 | 6.15715 |
| 0 | 7.20828 |
| 0 | 6.0319  |
| 0 | 6.32557 |
| 0 | 8.89277 |
| 0 | 7.03773 |
| 0 | 5.70506 |
| 0 | 5.34954 |
| 0 | 5.37206 |
| 0 | 5.61794 |
| 0 | 5.70366 |
| 0 | 7.32833 |
| 0 | 5.4217  |
| 0 | 6.25732 |
| 0 | 5.38438 |
| 0 | 8.61372 |



|   |         |
|---|---------|
| 0 | 5.6908  |
| 0 | 5.74571 |
| 0 | 5.49023 |
| 0 | 5.25443 |
| 0 | 7.63357 |
| 0 | 7.23882 |
| 0 | 5.31465 |
| 0 | 5.33057 |
| 0 | 6.60599 |
| 0 | 6.10285 |
| 0 | 6.10285 |
| 0 | 6.51843 |
| 0 | 5.59177 |
| 0 | 6.53618 |
| 0 | 8.12803 |
| 0 | 6.19346 |
| 0 | 8.7991  |
| 0 | 5.33916 |
| 0 | 5.54211 |
| 0 | 5.85846 |
| 0 | 6.02338 |
| 0 | 6.3954  |
| 0 | 6.99714 |
| 0 | 6.99714 |
| 0 | 5.28524 |
| 0 | 5.80104 |
| 0 | 5.80104 |
| 0 | 9.26352 |
| 0 | 8.08787 |
| 0 | 5.27544 |
| 0 | 5.50569 |
| 0 | 5.26944 |
| 0 | 5.68991 |
| 0 | 12.7277 |
| 0 | 5.97305 |
| 0 | 5.31761 |
| 0 | 6.25869 |
| 0 | 5.32485 |
| 0 | 5.32485 |
| 0 | 5.47209 |
| 0 | 5.31345 |
| 0 | 5.41848 |
| 0 | 10.1693 |
| 0 | 7.06284 |
| 0 | 5.8305  |
| 0 | 5.34596 |
| 0 | 5.89511 |

|          |         |
|----------|---------|
| 0        | 6.01135 |
| 0        | 7.03547 |
| 0        | 7.00681 |
| 0        | 8.57414 |
| 0        | 5.93152 |
| 0        | 6.49389 |
| 0        | 5.43021 |
| 0        | 8.35148 |
| 0        | 6.21863 |
| 0        | 5.48792 |
| 0        | 5.71973 |
| 0        | 6.06344 |
| 0        | 7.74672 |
| 0        | 5.76122 |
| 0        | 8.28396 |
| 0        | 6.04588 |
| 0        | 7.14136 |
| 0        | 5.46907 |
| 0        | 5.56154 |
| 0        | 5.41699 |
| 0        | 5.32892 |
| 0        | 5.37305 |
| 0        | 5.59086 |
| 0        | 5.35119 |
| 0        | 5.91063 |
| 0        | 5.52878 |
| 0        | 5.804   |
| 0        | 5.27663 |
| 0        | 5.27663 |
| 0        | 6.62743 |
| 0        | 6.34056 |
| 0        | 5.74053 |
| 0.352941 | 7.18451 |
| 0        | 9.11609 |
| 0        | 6.22393 |
| 0        | 6.11056 |
| 0        | 5.88683 |
| 0        | 7.00304 |
| 0        | 15.2042 |
| 0        | 5.4849  |
| 0        | 5.40014 |
| 0        | 5.57527 |
| 0        | 5.32017 |
| 0        | 7.17996 |
| 0        | 5.28489 |
| 0        | 5.35165 |
| 0        | 7.82286 |

|     |         |
|-----|---------|
| 0   | 9.19192 |
| 0   | 5.4071  |
| 0   | 5.4071  |
| 0   | 5.80884 |
| 0   | 7.55675 |
| 0   | 5.67618 |
| 0   | 5.70745 |
| 0   | 7.14992 |
| 0   | 7.1481  |
| 0   | 6.57114 |
| 0   | 6.03848 |
| 0   | 5.45705 |
| 0   | 5.69923 |
| 0   | 8.31613 |
| 0   | 6.76727 |
| 0   | 6.44393 |
| 0.8 | 8.16328 |
| 0   | 6.13188 |
| 0   | 5.31169 |
| 0   | 7.26885 |
| 0   | 6.04432 |
| 0   | 6.07522 |
| 0   | 5.77807 |
| 0   | 6.14061 |
| 0   | 6.4     |
| 0   | 7.93836 |
| 0   | 5.64111 |
| 0   | 5.76792 |
| 0   | 5.50943 |
| 0   | 8.57685 |
| 0   | 6.22325 |
| 0   | 8.70968 |
| 0   | 5.61829 |
| 0   | 7.4088  |
| 0   | 6.25515 |
| 0   | 5.42125 |
| 0   | 7.99393 |
| 0   | 5.96284 |
| 0   | 5.96284 |
| 0   | 5.42908 |
| 0   | 6.61571 |
| 0   | 7.45503 |
| 0   | 5.86728 |
| 0   | 5.38083 |
| 0   | 7.11837 |
| 0   | 7.23355 |
| 0   | 6.52671 |

|   |         |
|---|---------|
| 0 | 8.80566 |
| 0 | 6.32036 |
| 0 | 5.33875 |
| 0 | 5.56633 |
| 0 | 5.57062 |
| 0 | 6.08334 |
| 0 | 6.58609 |
| 0 | 5.50751 |
| 0 | 5.41419 |
| 0 | 5.38393 |
| 0 | 6.0152  |
| 0 | 8.06245 |
| 0 | 5.4337  |
| 0 | 6.80587 |
| 0 | 10.8189 |
| 0 | 7.60979 |
| 0 | 7.64049 |
| 0 | 7.97517 |
| 0 | 6.06836 |
| 0 | 7.17658 |
| 0 | 7.07506 |
| 0 | 7.26456 |
| 0 | 5.50084 |
| 0 | 6.14022 |
| 0 | 5.47178 |
| 0 | 5.56387 |
| 0 | 5.35642 |
| 0 | 5.45004 |
| 0 | 5.31533 |
| 0 | 7.03433 |
| 0 | 6.07274 |
| 0 | 6.26804 |
| 0 | 5.63447 |
| 0 | 5.63619 |
| 0 | 5.73558 |
| 0 | 6.26288 |
| 0 | 8.285   |
| 0 | 6.29039 |
| 0 | 6.49427 |
| 0 | 5.42395 |
| 0 | 7.06646 |
| 0 | 5.86559 |
| 0 | 5.26987 |
| 0 | 7.10791 |
| 0 | 7.927   |
| 0 | 6.20961 |
| 0 | 5.48382 |

|   |         |
|---|---------|
| 0 | 6.10581 |
| 0 | 5.84071 |
| 0 | 7.0807  |
| 0 | 5.63432 |
| 0 | 5.49718 |
| 0 | 7.85459 |
| 0 | 5.25347 |
| 0 | 5.35304 |
| 0 | 5.5279  |
| 0 | 9.21776 |
| 0 | 7.11026 |
| 0 | 5.67289 |
| 0 | 8.1932  |
| 0 | 6.15524 |
| 0 | 8.25848 |
| 0 | 5.82816 |
| 0 | 5.3084  |
| 0 | 5.3084  |
| 0 | 8.48805 |
| 0 | 5.44144 |
| 0 | 7.7943  |
| 0 | 5.91328 |
| 0 | 6.61491 |
| 0 | 5.37155 |
| 0 | 5.42347 |
| 0 | 8.10693 |
| 0 | 5.87635 |
| 0 | 5.26271 |
| 0 | 5.26271 |
| 0 | 5.49894 |
| 0 | 5.35498 |
| 0 | 5.37022 |
| 0 | 6.21292 |
| 0 | 7.3552  |
| 0 | 5.72934 |
| 0 | 5.71948 |
| 0 | 7.68392 |
| 0 | 5.94757 |
| 0 | 8.10256 |
| 0 | 5.3534  |
| 0 | 6.16995 |
| 0 | 8.26409 |
| 0 | 5.69034 |
| 0 | 5.38922 |
| 0 | 6.32446 |
| 0 | 5.25375 |
| 0 | 5.30085 |

|   |         |
|---|---------|
| 0 | 5.52809 |
| 0 | 5.33674 |
| 0 | 5.49592 |
| 0 | 10.3248 |
| 0 | 7.44324 |
| 0 | 7.04574 |
| 0 | 7.03787 |
| 0 | 5.37161 |
| 0 | 5.85704 |
| 0 | 6.09496 |
| 0 | 6.06691 |
| 0 | 6.06691 |
| 0 | 6.18622 |
| 0 | 5.32747 |
| 0 | 5.33422 |
| 0 | 7.32927 |
| 0 | 5.55915 |
| 0 | 5.38144 |
| 0 | 5.7     |
| 0 | 10.0331 |
| 0 | 9.52832 |
| 0 | 6.48364 |
| 0 | 6.70247 |
| 0 | 9.48229 |
| 0 | 5.295   |
| 0 | 8.19088 |
| 0 | 5.30218 |
| 0 | 6.21577 |
| 0 | 6.46609 |
| 0 | 15.0713 |
| 0 | 6.164   |
| 0 | 5.31384 |
| 0 | 6.66515 |
| 0 | 6.66515 |
| 0 | 7.24828 |
| 0 | 5.25198 |
| 0 | 5.25198 |
| 0 | 7.45898 |
| 0 | 6.17379 |
| 0 | 8.18292 |
| 0 | 6.91358 |
| 0 | 7.0494  |
| 0 | 5.33215 |
| 0 | 5.50589 |
| 0 | 7.80516 |
| 0 | 11.1572 |
| 0 | 5.3554  |

|   |         |
|---|---------|
| 0 | 5.73848 |
| 0 | 7.1655  |
| 0 | 5.40351 |
| 0 | 7.49646 |
| 0 | 5.2727  |
| 0 | 7.5772  |
| 0 | 5.38728 |
| 0 | 5.75561 |
| 0 | 5.47348 |
| 0 | 5.68262 |
| 0 | 5.87838 |
| 0 | 5.4192  |
| 0 | 5.45256 |
| 0 | 5.73353 |
| 0 | 6.48265 |
| 0 | 7.27664 |
| 0 | 7.05385 |
| 0 | 8.30536 |
| 0 | 6.01673 |
| 0 | 6.57653 |
| 0 | 5.27699 |
| 0 | 5.26059 |
| 0 | 5.67331 |
| 0 | 6.58565 |
| 0 | 6.92519 |
| 0 | 6.30702 |
| 0 | 5.32952 |
| 0 | 5.40364 |
| 0 | 8.17107 |
| 0 | 5.7374  |
| 0 | 6.0744  |
| 0 | 5.57673 |
| 0 | 5.6484  |
| 0 | 6.39819 |
| 0 | 9.44751 |
| 0 | 10.8385 |
| 0 | 7.68276 |
| 0 | 6.17628 |
| 0 | 5.37401 |
| 0 | 6.04294 |
| 0 | 7.23276 |
| 0 | 7.2875  |
| 0 | 5.43602 |
| 0 | 6.1466  |
| 0 | 12.523  |
| 0 | 8.69788 |
| 0 | 5.48168 |

|   |         |
|---|---------|
| 0 | 5.45926 |
| 0 | 5.30269 |
| 0 | 5.53192 |
| 0 | 6.52506 |
| 0 | 5.67242 |
| 0 | 6.64318 |
| 0 | 6.01613 |
| 0 | 5.92499 |
| 0 | 5.44    |
| 0 | 7.87927 |
| 0 | 5.3259  |
| 0 | 8.56014 |
| 0 | 5.73163 |
| 0 | 5.34567 |
| 0 | 8.51458 |
| 0 | 6.02933 |
| 0 | 6.8742  |
| 0 | 5.43549 |
| 0 | 5.43549 |
| 0 | 5.35481 |
| 0 | 5.42472 |
| 0 | 7.17977 |
| 0 | 5.36249 |
| 0 | 5.47891 |
| 0 | 5.29566 |
| 0 | 5.29419 |
| 0 | 5.51158 |
| 0 | 6.24232 |
| 0 | 6.26515 |
| 0 | 7.29931 |
| 0 | 5.84543 |
| 0 | 6.42122 |
| 0 | 7.28267 |
| 0 | 5.93433 |
| 0 | 8.07804 |
| 0 | 6.24032 |
| 0 | 6.2725  |
| 0 | 5.55605 |
| 0 | 6.87972 |
| 0 | 6.02611 |
| 0 | 7.0493  |
| 0 | 5.83387 |
| 0 | 6.1353  |
| 0 | 6.16112 |
| 0 | 6.16112 |
| 0 | 5.80306 |
| 0 | 6.08781 |



|   |         |
|---|---------|
| 0 | 6.20362 |
| 0 | 9.35721 |
| 0 | 6.08405 |
| 0 | 8.07963 |
| 0 | 6.07658 |
| 0 | 6.07658 |
| 0 | 5.42628 |
| 0 | 5.34762 |
| 0 | 5.58861 |
| 0 | 7.4249  |
| 0 | 7.05692 |
| 0 | 6.00714 |
| 0 | 6.01097 |
| 0 | 5.41885 |
| 0 | 6.75901 |
| 0 | 6.73511 |
| 0 | 6.13484 |
| 0 | 5.68126 |
| 0 | 6.21863 |
| 0 | 7.32246 |
| 0 | 5.70241 |
| 0 | 5.71329 |
| 0 | 8.47241 |
| 0 | 5.83556 |
| 0 | 5.76908 |
| 0 | 10.134  |
| 0 | 5.90619 |
| 0 | 6.07252 |
| 0 | 6.07252 |
| 0 | 5.69449 |
| 0 | 7.37374 |
| 0 | 7.00638 |
| 0 | 5.36117 |
| 0 | 5.55078 |
| 0 | 6.17021 |
| 0 | 5.30813 |
| 0 | 6.02032 |
| 0 | 9.8138  |
| 0 | 6.21455 |
| 0 | 5.69837 |
| 0 | 5.39644 |
| 0 | 5.29559 |
| 0 | 5.39888 |
| 0 | 9.0031  |
| 0 | 5.39622 |
| 0 | 6.51765 |
| 0 | 5.26481 |

|   |         |
|---|---------|
| 0 | 5.64001 |
| 0 | 5.25711 |
| 0 | 6.05527 |
| 0 | 5.77929 |
| 0 | 5.41071 |
| 0 | 5.29505 |
| 0 | 5.44132 |
| 0 | 7.02515 |
| 0 | 5.25767 |
| 0 | 5.69017 |
| 0 | 6.06899 |
| 0 | 6.32184 |
| 0 | 6.32184 |
| 0 | 5.63679 |
| 0 | 9.39695 |
| 0 | 6.23984 |
| 0 | 7.70572 |
| 0 | 5.34784 |
| 0 | 7.3104  |
| 0 | 5.59543 |
| 0 | 7.35372 |
| 0 | 5.57633 |
| 0 | 7.5475  |
| 0 | 5.43084 |
| 0 | 6.57535 |
| 0 | 5.36739 |
| 0 | 5.36102 |
| 0 | 7.09683 |
| 0 | 10.2345 |
| 0 | 10.4239 |
| 0 | 6.27638 |
| 0 | 5.46789 |
| 0 | 7.01902 |
| 0 | 6.0152  |
| 0 | 5.30387 |
| 0 | 6.49372 |
| 0 | 7.2767  |
| 0 | 6.53912 |
| 0 | 5.28643 |
| 0 | 5.45525 |
| 0 | 5.87999 |
| 0 | 5.42676 |
| 0 | 7.81387 |
| 0 | 5.28873 |
| 0 | 5.27057 |
| 0 | 8.3877  |
| 0 | 8.53126 |

|   |         |
|---|---------|
| 0 | 7.43937 |
| 0 | 5.34388 |
| 0 | 8.68393 |
| 0 | 5.29285 |
| 0 | 6.02392 |
| 0 | 7.36418 |
| 0 | 7.50872 |
| 0 | 6.4419  |
| 0 | 8.21129 |
| 0 | 8.06265 |
| 0 | 5.60908 |
| 0 | 9.80589 |
| 0 | 8.35569 |
| 0 | 5.53576 |
| 0 | 5.53799 |
| 0 | 6.10931 |
| 0 | 5.2608  |
| 0 | 5.29778 |
| 0 | 6.56739 |
| 0 | 5.82712 |
| 0 | 5.37799 |
| 0 | 5.43345 |
| 0 | 5.43807 |
| 0 | 5.34497 |
| 0 | 6.83166 |
| 0 | 5.59382 |
| 0 | 5.43324 |
| 0 | 5.45283 |
| 0 | 9.79845 |
| 0 | 6.33123 |
| 0 | 6.2559  |
| 0 | 6.2559  |
| 0 | 5.33081 |
| 0 | 5.3743  |
| 0 | 10.0141 |
| 0 | 5.28931 |
| 0 | 7.14914 |
| 0 | 5.44026 |
| 0 | 7.05222 |
| 0 | 7.04237 |
| 0 | 5.62888 |
| 0 | 8.11552 |
| 0 | 8.11552 |
| 0 | 5.66035 |
| 0 | 5.43501 |
| 0 | 6.01443 |
| 0 | 5.34846 |

|   |         |
|---|---------|
| 0 | 5.76708 |
| 0 | 5.6134  |
| 0 | 5.44337 |
| 0 | 5.30832 |
| 0 | 5.60976 |
| 0 | 6.05272 |
| 0 | 6.00824 |
| 0 | 6.19308 |
| 0 | 7.28385 |
| 0 | 6.97511 |
| 0 | 5.60032 |
| 0 | 5.28368 |
| 0 | 6.17401 |
| 0 | 6.12866 |
| 0 | 7.29083 |
| 0 | 6.09792 |
| 0 | 5.26943 |
| 0 | 5.32698 |
| 0 | 7.18537 |
| 0 | 5.44347 |
| 0 | 5.4991  |
| 0 | 6.58991 |
| 0 | 6.15846 |
| 0 | 6.29745 |
| 0 | 10.1517 |
| 0 | 10.1517 |
| 0 | 6.944   |
| 0 | 11.0065 |
| 0 | 5.40976 |
| 0 | 5.26185 |
| 0 | 5.29679 |
| 0 | 6.06186 |
| 0 | 5.56377 |
| 0 | 5.30049 |
| 0 | 5.25237 |
| 0 | 8.40812 |
| 0 | 5.49984 |
| 0 | 6.27437 |
| 0 | 5.40503 |
| 0 | 5.36294 |
| 0 | 8.10316 |
| 0 | 6.13257 |
| 0 | 7.1847  |
| 0 | 5.4248  |
| 0 | 8.10171 |
| 0 | 8.10171 |
| 0 | 7.18812 |

|   |         |
|---|---------|
| 0 | 5.78204 |
| 0 | 5.62454 |
| 0 | 5.50901 |
| 0 | 5.583   |
| 0 | 5.36283 |
| 0 | 5.37169 |
| 0 | 6.28563 |
| 0 | 6.59905 |
| 0 | 6.59905 |
| 0 | 9.49958 |
| 0 | 5.30053 |
| 0 | 6.31097 |
| 0 | 6.51036 |
| 0 | 5.95325 |
| 0 | 5.32142 |
| 0 | 6.26886 |
| 0 | 6.32092 |
| 0 | 6.00347 |
| 0 | 5.6118  |
| 0 | 5.33653 |
| 0 | 7.04752 |
| 0 | 5.5037  |
| 0 | 6.1418  |
| 0 | 5.41409 |
| 0 | 6.26526 |
| 0 | 7.03267 |
| 0 | 7.11353 |
| 0 | 5.25167 |
| 0 | 5.57219 |
| 0 | 6.04834 |
| 0 | 5.25225 |
| 0 | 6.13439 |
| 0 | 6.12623 |
| 0 | 9.28932 |
| 0 | 6.09605 |
| 0 | 8.52533 |
| 0 | 5.5339  |
| 0 | 5.39609 |
| 0 | 5.64599 |
| 0 | 6.20296 |
| 0 | 9.05884 |
| 0 | 6.07036 |
| 0 | 5.35506 |
| 0 | 6.15009 |
| 0 | 5.55425 |
| 0 | 10.2797 |
| 0 | 10.2797 |

|   |         |
|---|---------|
| 0 | 5.49566 |
| 0 | 9.46497 |
| 0 | 5.67888 |
| 0 | 6.07577 |
| 0 | 6.16487 |
| 0 | 5.29542 |
| 0 | 6.23549 |
| 0 | 5.54667 |
| 0 | 5.53518 |
| 0 | 7.43093 |
| 0 | 5.44642 |
| 0 | 5.44642 |
| 0 | 6.14305 |
| 0 | 6.22504 |
| 0 | 6.25461 |
| 0 | 7.29973 |
| 0 | 5.70222 |
| 0 | 6.15719 |
| 0 | 7.03116 |
| 0 | 7.03116 |
| 0 | 6.54656 |
| 0 | 5.49788 |
| 0 | 5.3025  |
| 0 | 6.25323 |
| 0 | 6.24001 |
| 0 | 5.6471  |
| 0 | 5.5161  |
| 0 | 5.32093 |
| 0 | 5.45969 |
| 0 | 5.43286 |
| 0 | 10.0007 |
| 0 | 8.18643 |
| 0 | 5.79056 |
| 0 | 5.69566 |
| 0 | 6.13949 |
| 0 | 10.6299 |
| 0 | 6.35293 |
| 0 | 5.41827 |
| 0 | 5.35323 |
| 0 | 5.2633  |
| 0 | 5.30586 |
| 0 | 5.49729 |
| 0 | 5.56598 |
| 0 | 7.10491 |
| 0 | 8.05327 |
| 0 | 7.00673 |
| 0 | 6.16475 |

|   |         |
|---|---------|
| 0 | 5.84924 |
| 0 | 7.15793 |
| 0 | 6.14369 |
| 0 | 5.53063 |
| 0 | 8.5526  |
| 0 | 7.48618 |
| 0 | 5.52376 |
| 0 | 6.20111 |
| 0 | 5.26671 |
| 0 | 7.13411 |
| 0 | 6.45178 |
| 0 | 6.4403  |
| 0 | 5.50906 |
| 0 | 8.20646 |
| 0 | 5.25723 |
| 0 | 5.7993  |
| 0 | 5.7993  |
| 0 | 6.35502 |
| 0 | 6.18496 |
| 0 | 5.86855 |
| 0 | 8.83701 |
| 0 | 5.25814 |
| 0 | 5.6185  |
| 0 | 5.27593 |
| 0 | 6.13387 |
| 0 | 5.65424 |
| 0 | 6.23013 |
| 0 | 6.80915 |
| 0 | 5.5787  |
| 0 | 5.35568 |
| 0 | 6.06015 |
| 0 | 5.3405  |
| 0 | 5.3405  |
| 0 | 5.82783 |
| 0 | 6.02957 |
| 0 | 5.58219 |
| 0 | 5.94831 |
| 0 | 6.29709 |
| 0 | 5.25696 |
| 0 | 6.98814 |
| 0 | 5.50378 |
| 0 | 8.59248 |
| 0 | 5.62397 |
| 0 | 8.25154 |
| 0 | 5.56437 |
| 0 | 5.7283  |
| 0 | 6.07693 |

|     |         |
|-----|---------|
| 0   | 6.0553  |
| 0   | 5.27546 |
| 0   | 5.52628 |
| 0   | 5.5125  |
| 0   | 5.35944 |
| 0   | 7.39028 |
| 0   | 6.27459 |
| 0   | 6.27459 |
| 0   | 5.52356 |
| 0   | 6.46793 |
| 0.2 | 8.17344 |
| 0   | 6.21187 |
| 0   | 5.42667 |
| 0   | 6.53687 |
| 0   | 6.53687 |
| 0   | 5.77842 |
| 0   | 7.12305 |
| 0   | 5.62801 |
| 0   | 5.26463 |
| 0   | 5.41006 |
| 0   | 5.32116 |
| 0   | 8.12531 |
| 0   | 6.29151 |
| 0   | 5.27974 |
| 0   | 5.96637 |
| 0   | 5.46337 |
| 0   | 7.24804 |
| 0   | 6.10267 |
| 0   | 9.0345  |
| 0   | 5.64905 |
| 0   | 7.04424 |
| 0   | 6.68911 |
| 0   | 5.40145 |
| 0   | 5.28233 |
| 0   | 6.16384 |
| 0   | 5.56272 |
| 0   | 5.59193 |
| 0   | 5.4563  |
| 0   | 10.1763 |
| 0   | 5.32702 |
| 0   | 6.127   |
| 0   | 7.80959 |
| 0   | 7.80959 |
| 0   | 6.25345 |
| 0   | 5.47299 |
| 0   | 5.43737 |
| 0   | 7.50262 |



|   |         |
|---|---------|
| 0 | 7.30437 |
| 0 | 5.3387  |
| 0 | 6.54447 |
| 0 | 5.78742 |
| 0 | 6.17413 |
| 0 | 5.42833 |
| 0 | 5.52201 |
| 0 | 7.25158 |
| 0 | 5.89701 |
| 0 | 7.78594 |
| 0 | 6.08729 |
| 0 | 5.26841 |
| 0 | 7.44327 |
| 0 | 5.46141 |
| 0 | 5.40774 |
| 0 | 10.2954 |
| 0 | 5.3664  |
| 0 | 5.37241 |
| 0 | 6.15117 |
| 0 | 6.15117 |
| 0 | 5.30413 |
| 0 | 5.48804 |
| 0 | 6.21568 |
| 0 | 6.21568 |
| 0 | 5.30949 |
| 0 | 5.7941  |
| 0 | 5.39617 |
| 0 | 6.21444 |
| 0 | 6.83348 |
| 0 | 7.74971 |
| 0 | 5.87151 |
| 0 | 6.16556 |
| 0 | 5.29951 |
| 0 | 7.31618 |
| 0 | 5.26587 |
| 0 | 5.57821 |
| 0 | 5.5362  |
| 0 | 8.29653 |
| 0 | 5.83977 |
| 0 | 6.70085 |
| 0 | 5.49199 |
| 0 | 6.14336 |
| 0 | 7.87759 |
| 0 | 7.87759 |
| 0 | 10.3747 |
| 0 | 10.3123 |
| 0 | 9.02502 |

|          |         |
|----------|---------|
| 0        | 6.04986 |
| 0        | 5.36109 |
| 0        | 6.3549  |
| 0        | 5.41023 |
| 0        | 7.38928 |
| 0        | 14.0409 |
| 0        | 6.0341  |
| 0        | 6.18448 |
| 0        | 5.53693 |
| 0        | 5.27692 |
| 0        | 8.02642 |
| 0        | 7.18582 |
| 0        | 6.61083 |
| 0        | 6.30982 |
| 0        | 5.59512 |
| 0        | 7.34011 |
| 0        | 6.17799 |
| 0        | 5.82355 |
| 0        | 6.62938 |
| 0        | 5.4719  |
| 0        | 6.2282  |
| 0        | 5.33419 |
| 0        | 6.28087 |
| 0        | 6.31281 |
| 0        | 6.18745 |
| 0        | 6.38187 |
| 0        | 6.3562  |
| 0        | 5.86497 |
| 0.296296 | 14.9284 |
| 0        | 7.89386 |
| 0        | 5.3166  |
| 0        | 5.42369 |
| 0        | 7.18144 |
| 0        | 5.78566 |
| 0        | 6.30521 |
| 0        | 6.30521 |
| 0        | 5.33046 |
| 0        | 7.27301 |
| 0        | 7.61171 |
| 0        | 5.27781 |
| 0        | 5.41275 |
| 0        | 5.38029 |
| 0        | 5.58214 |
| 0        | 6.25319 |
| 0        | 5.6335  |
| 0        | 6.58762 |
| 0        | 6.70242 |

|   |         |
|---|---------|
| 0 | 7.04064 |
| 0 | 6.77916 |
| 0 | 6.21446 |
| 0 | 5.60653 |
| 0 | 5.52412 |
| 0 | 7.08277 |
| 0 | 5.62607 |
| 0 | 9.70341 |
| 0 | 12.5634 |
| 0 | 9.79816 |
| 0 | 6.02486 |
| 0 | 5.30387 |
| 0 | 5.5937  |
| 0 | 5.4989  |
| 0 | 6.56188 |
| 0 | 6.84635 |
| 0 | 9.72439 |
| 0 | 5.65112 |
| 0 | 5.27048 |
| 0 | 6.38983 |
| 0 | 5.49338 |
| 0 | 7.22227 |
| 0 | 7.49659 |
| 0 | 5.71836 |
| 0 | 6.26419 |
| 0 | 6.5481  |
| 0 | 5.9183  |
| 0 | 6.13883 |
| 0 | 5.54077 |
| 0 | 5.28092 |
| 0 | 6.37597 |
| 0 | 6.48392 |
| 0 | 6.19723 |
| 0 | 5.39073 |
| 0 | 6.13595 |
| 0 | 5.41836 |
| 0 | 5.4268  |
| 0 | 5.42318 |
| 0 | 7.07872 |
| 0 | 5.48049 |
| 0 | 6.10723 |
| 0 | 6.25194 |
| 0 | 6.15363 |
| 0 | 5.73407 |
| 0 | 6.59904 |
| 0 | 5.55677 |
| 0 | 6.15623 |

|   |         |
|---|---------|
| 0 | 5.33812 |
| 0 | 5.54207 |
| 0 | 5.62762 |
| 0 | 5.25867 |
| 0 | 5.65811 |
| 0 | 8.27241 |
| 0 | 5.4961  |
| 0 | 5.34373 |
| 0 | 5.6259  |
| 0 | 5.25688 |
| 0 | 5.3839  |
| 0 | 7.01369 |
| 0 | 7.04365 |
| 0 | 5.30647 |
| 0 | 6.22248 |
| 0 | 5.29541 |
| 0 | 6.17191 |
| 0 | 5.38314 |
| 0 | 6.03696 |
| 0 | 7.45926 |
| 0 | 8.11969 |
| 0 | 5.44898 |
| 0 | 5.52413 |
| 0 | 6.73229 |
| 0 | 8.30722 |
| 0 | 9.37418 |
| 0 | 6.01893 |
| 0 | 6.09141 |
| 0 | 7.21941 |
| 0 | 6.27557 |
| 0 | 6.27557 |
| 0 | 10.278  |
| 0 | 6.66623 |
| 0 | 7.29758 |
| 0 | 9.07072 |
| 0 | 5.96165 |
| 0 | 6.17282 |
| 0 | 6.07447 |
| 0 | 5.762   |
| 0 | 6.06198 |
| 0 | 6.06198 |
| 0 | 5.34466 |
| 0 | 5.40558 |
| 0 | 7.72198 |
| 0 | 5.4653  |
| 0 | 5.40113 |
| 0 | 6.82989 |

|   |         |
|---|---------|
| 0 | 9.0565  |
| 0 | 5.80648 |
| 0 | 5.61929 |
| 0 | 6.19445 |
| 0 | 6.17171 |
| 0 | 5.66043 |
| 0 | 5.60971 |
| 0 | 5.39248 |
| 0 | 6.10514 |
| 0 | 5.27062 |
| 0 | 5.70299 |
| 0 | 6.07435 |
| 0 | 5.54427 |
| 0 | 5.43678 |
| 0 | 5.59144 |
| 0 | 5.94606 |
| 0 | 6.28981 |
| 0 | 6.00831 |
| 0 | 6.30543 |
| 0 | 5.46433 |
| 0 | 5.43168 |
| 0 | 5.43168 |
| 0 | 5.6648  |
| 0 | 5.47819 |
| 0 | 6.17203 |
| 0 | 5.29698 |
| 0 | 7.14474 |
| 0 | 7.23023 |
| 0 | 5.27325 |
| 0 | 5.5442  |
| 0 | 5.3638  |
| 0 | 6.15974 |
| 0 | 5.99496 |
| 0 | 6.78258 |
| 0 | 7.33538 |
| 0 | 5.51682 |
| 0 | 5.37819 |
| 0 | 5.28124 |
| 0 | 6.36603 |
| 0 | 6.23521 |
| 0 | 7.03868 |
| 0 | 5.4177  |
| 0 | 5.48039 |
| 0 | 9.02513 |
| 0 | 6.11435 |
| 0 | 5.58598 |
| 0 | 7.69606 |

|   |         |
|---|---------|
| 0 | 7.08138 |
| 0 | 5.45715 |
| 0 | 6.33349 |
| 0 | 5.36449 |
| 0 | 5.27896 |
| 0 | 5.48903 |
| 0 | 5.66027 |
| 0 | 5.3653  |
| 0 | 6.52831 |
| 0 | 6.10018 |
| 0 | 6.50071 |
| 0 | 5.46946 |
| 0 | 6.22535 |
| 0 | 7.47354 |
| 0 | 5.32003 |
| 0 | 5.54331 |
| 0 | 7.66056 |
| 0 | 6.2382  |
| 0 | 5.28298 |
| 0 | 5.45812 |
| 0 | 5.71889 |
| 0 | 5.60058 |
| 0 | 6.2153  |
| 0 | 6.35773 |
| 0 | 6.59475 |
| 0 | 6.45314 |
| 0 | 5.64229 |
| 0 | 5.47388 |
| 0 | 8.23781 |
| 0 | 5.60756 |
| 0 | 5.43296 |
| 0 | 7.16458 |
| 0 | 6.30729 |
| 0 | 5.60638 |
| 0 | 5.35742 |
| 0 | 6.29524 |
| 0 | 6.23236 |
| 0 | 5.5409  |
| 0 | 5.44059 |
| 0 | 5.72764 |
| 0 | 5.27684 |
| 0 | 6.45316 |
| 0 | 5.43143 |
| 0 | 6.20476 |
| 0 | 5.69977 |
| 0 | 11.3775 |
| 0 | 6.22304 |

|   |         |
|---|---------|
| 0 | 5.43136 |
| 0 | 5.74893 |
| 0 | 6.35476 |
| 0 | 5.40218 |
| 0 | 5.35058 |
| 0 | 7.57359 |
| 0 | 5.33647 |
| 0 | 5.94442 |
| 0 | 6.1775  |
| 0 | 6.16363 |
| 0 | 9.2568  |
| 0 | 7.2683  |
| 0 | 8.17728 |
| 0 | 6.15099 |
| 0 | 5.44082 |
| 0 | 5.30785 |
| 0 | 5.30785 |
| 0 | 6.14479 |
| 0 | 5.31876 |
| 0 | 6.03772 |
| 0 | 5.84824 |
| 0 | 6.03801 |
| 0 | 6.47651 |
| 0 | 6.01108 |
| 0 | 6.48005 |
| 0 | 6.43688 |
| 0 | 5.67477 |
| 0 | 8.25771 |
| 0 | 7.72857 |
| 0 | 5.39733 |
| 0 | 5.35692 |
| 0 | 5.3728  |
| 0 | 7.10208 |
| 0 | 5.32266 |
| 0 | 6.02605 |
| 0 | 10.6028 |
| 0 | 7.184   |
| 0 | 5.41862 |
| 0 | 5.25713 |
| 0 | 5.67371 |
| 0 | 6.12501 |
| 0 | 5.5167  |
| 0 | 9.26435 |
| 0 | 6.06391 |
| 0 | 5.68547 |
| 0 | 5.78898 |
| 0 | 6.2258  |

|   |         |
|---|---------|
| 0 | 5.6698  |
| 0 | 8.22847 |
| 0 | 7.06281 |
| 0 | 8.15674 |
| 0 | 7.54141 |
| 0 | 5.46148 |
| 0 | 5.366   |
| 0 | 5.28084 |
| 0 | 5.25585 |
| 0 | 6.21398 |
| 0 | 6.43837 |
| 0 | 6.43837 |
| 0 | 7.8817  |
| 0 | 5.30918 |
| 0 | 5.78657 |
| 0 | 6.01063 |
| 0 | 6.32395 |
| 0 | 5.78734 |
| 0 | 7.64975 |
| 0 | 10.1071 |
| 0 | 9.49804 |
| 0 | 5.29283 |
| 0 | 5.28825 |
| 0 | 5.28247 |
| 0 | 8.20395 |
| 0 | 6.52542 |
| 0 | 6.24567 |
| 0 | 5.31563 |
| 0 | 6.81789 |
| 0 | 5.53698 |
| 0 | 6.51557 |
| 0 | 5.55358 |
| 0 | 5.27371 |
| 0 | 5.29558 |
| 0 | 5.5872  |
| 0 | 5.33442 |
| 0 | 5.61299 |
| 0 | 6.45392 |
| 0 | 6.00971 |
| 0 | 6.03134 |
| 0 | 5.42305 |
| 0 | 6.52797 |
| 0 | 13.0006 |
| 0 | 5.32361 |
| 0 | 7.34052 |
| 0 | 6.27494 |
| 0 | 5.68782 |



|   |         |
|---|---------|
| 0 | 6.33989 |
| 0 | 7.03013 |
| 0 | 6.44016 |
| 0 | 6.28824 |
| 0 | 5.56751 |
| 0 | 5.44485 |
| 0 | 6.10015 |
| 0 | 7.0084  |
| 0 | 5.2538  |
| 0 | 7.06463 |
| 0 | 14.0553 |
| 0 | 6.14989 |
| 0 | 7.10017 |
| 0 | 6.25804 |
| 0 | 6.17492 |
| 0 | 8.82719 |
| 0 | 5.49808 |
| 0 | 6.15847 |
| 0 | 6.76371 |
| 0 | 7.22459 |
| 0 | 5.46708 |
| 0 | 5.31485 |
| 0 | 5.28179 |
| 0 | 6.4617  |
| 0 | 5.38865 |
| 0 | 5.63615 |
| 0 | 9.21554 |
| 0 | 5.71063 |
| 0 | 6.0721  |
| 0 | 6.05964 |
| 0 | 5.42849 |
| 0 | 5.49773 |
| 0 | 5.34927 |
| 0 | 6.52115 |
| 0 | 5.46323 |
| 0 | 6.01792 |
| 0 | 7.49945 |
| 0 | 5.7118  |
| 0 | 7.1238  |
| 0 | 7.14059 |
| 0 | 5.443   |
| 0 | 6.03719 |
| 0 | 6.06175 |
| 0 | 5.388   |
| 0 | 5.69942 |
| 0 | 8.18388 |
| 0 | 6.10511 |

|     |         |
|-----|---------|
| 0   | 5.34887 |
| 0   | 6.3645  |
| 0   | 6.16276 |
| 0   | 6.0732  |
| 0   | 6.72935 |
| 0   | 5.26658 |
| 0   | 5.31702 |
| 0   | 5.49809 |
| 0   | 5.35776 |
| 0   | 5.3749  |
| 0   | 5.79206 |
| 0   | 5.28765 |
| 0   | 7.06348 |
| 0   | 14.0221 |
| 0   | 5.4165  |
| 0   | 8.10888 |
| 0   | 6.45919 |
| 0   | 5.34167 |
| 0   | 5.53834 |
| 0   | 5.48297 |
| 0   | 5.33671 |
| 0   | 5.73599 |
| 0   | 5.73599 |
| 0   | 5.65086 |
| 0   | 8.12029 |
| 0   | 7.57357 |
| 0   | 5.69034 |
| 0   | 8.00176 |
| 0   | 7.27998 |
| 0   | 6.1644  |
| 0   | 5.59885 |
| 0   | 5.87768 |
| 0   | 5.50228 |
| 0   | 6.32567 |
| 0   | 5.36909 |
| 0   | 5.61904 |
| 0   | 5.73088 |
| 0   | 6.67062 |
| 0   | 6.28619 |
| 0   | 6.5908  |
| 0.5 | 7.80972 |
| 0.5 | 7.80972 |
| 0   | 6.38409 |
| 0   | 6.13743 |
| 0   | 5.39248 |
| 0   | 5.72978 |
| 0   | 8.0415  |

|   |         |
|---|---------|
| 0 | 6.51427 |
| 0 | 5.61753 |
| 0 | 5.31178 |
| 0 | 6.20806 |
| 0 | 6.29381 |
| 0 | 5.67189 |
| 0 | 5.37026 |
| 0 | 5.58349 |
| 0 | 7.49231 |
| 0 | 6.65354 |
| 0 | 7.15697 |
| 0 | 5.48193 |
| 0 | 5.36785 |
| 0 | 7.14077 |
| 0 | 10.3011 |
| 0 | 6.91022 |
| 0 | 5.32744 |
| 0 | 5.59901 |
| 0 | 6.22519 |
| 0 | 5.65704 |
| 0 | 6.15973 |
| 0 | 5.38751 |
| 0 | 6.49348 |
| 0 | 5.32016 |
| 0 | 5.30744 |
| 0 | 6.19328 |
| 0 | 5.30139 |
| 0 | 9.02564 |
| 0 | 6.19279 |
| 0 | 6.10411 |
| 0 | 5.29382 |
| 0 | 6.19956 |
| 0 | 6.19956 |
| 0 | 7.10898 |
| 0 | 6.43502 |
| 0 | 6.43502 |
| 0 | 8.09739 |
| 0 | 5.75063 |
| 0 | 8.20312 |
| 0 | 5.31616 |
| 0 | 5.65775 |
| 0 | 5.55867 |
| 0 | 6.03053 |
| 0 | 5.65273 |
| 0 | 6.16321 |
| 0 | 5.40611 |
| 0 | 6.1266  |

|   |         |
|---|---------|
| 0 | 5.32913 |
| 0 | 6.67668 |
| 0 | 6.33854 |
| 0 | 7.31279 |
| 0 | 5.373   |
| 0 | 6.01205 |
| 0 | 5.41184 |
| 0 | 5.30844 |
| 0 | 5.35487 |
| 0 | 5.83128 |
| 0 | 5.4261  |
| 0 | 9.3237  |
| 0 | 5.91672 |
| 0 | 5.29725 |
| 0 | 6.22911 |
| 0 | 5.28111 |
| 0 | 6.70069 |
| 0 | 6.21612 |
| 0 | 5.25107 |
| 0 | 6.01132 |
| 0 | 5.86015 |
| 0 | 8.11555 |
| 0 | 5.50371 |
| 0 | 6.36168 |
| 0 | 5.70778 |
| 0 | 5.47021 |
| 0 | 6.2489  |
| 0 | 8.31388 |
| 0 | 5.64655 |
| 0 | 6.01571 |
| 0 | 7.57886 |
| 0 | 7.21799 |
| 0 | 10.0101 |
| 0 | 7.18703 |
| 0 | 5.34265 |
| 0 | 6.10617 |
| 0 | 8.43416 |
| 0 | 5.68171 |
| 0 | 6.18726 |
| 0 | 5.28795 |
| 0 | 7.02042 |
| 0 | 5.85981 |
| 0 | 5.38964 |
| 0 | 6.16108 |
| 0 | 5.38168 |
| 0 | 5.4355  |
| 0 | 5.51094 |

|   |         |
|---|---------|
| 0 | 6.13203 |
| 0 | 8.05289 |
| 0 | 5.26174 |
| 0 | 7.46288 |
| 0 | 7.03503 |
| 0 | 9.08156 |
| 0 | 9.08156 |
| 0 | 5.30828 |
| 0 | 6.12191 |
| 0 | 6.49419 |
| 0 | 5.97056 |
| 0 | 5.63834 |
| 0 | 5.96305 |
| 0 | 5.57118 |
| 0 | 5.88122 |
| 0 | 5.51679 |
| 0 | 5.31557 |
| 0 | 5.36704 |
| 0 | 10.0103 |
| 0 | 6.32776 |
| 0 | 5.39018 |
| 0 | 5.60832 |
| 0 | 7.12651 |
| 0 | 5.77816 |
| 0 | 5.8388  |
| 0 | 5.25841 |
| 0 | 5.6137  |
| 0 | 8.51293 |
| 0 | 7.65534 |
| 0 | 5.30025 |
| 0 | 6.14589 |
| 0 | 7.21349 |
| 0 | 5.28783 |
| 0 | 5.27228 |
| 0 | 9.02002 |
| 0 | 5.79689 |
| 0 | 5.6479  |
| 0 | 10.9946 |
| 0 | 7.21514 |
| 0 | 6.08017 |
| 0 | 5.60568 |
| 0 | 5.53413 |
| 0 | 5.30712 |
| 0 | 6.13562 |
| 0 | 8.12069 |
| 0 | 6.48612 |
| 0 | 5.94545 |

|   |         |
|---|---------|
| 0 | 8.48674 |
| 0 | 6.07178 |
| 0 | 6.07178 |
| 0 | 9.35818 |
| 0 | 8.58157 |
| 0 | 7.22896 |
| 0 | 5.3182  |
| 0 | 6.73554 |
| 0 | 5.88564 |
| 0 | 9.53925 |
| 0 | 5.28194 |
| 0 | 6.65271 |
| 0 | 6.79386 |
| 0 | 7.74394 |
| 0 | 6.19882 |
| 0 | 5.70375 |
| 0 | 6.16852 |
| 0 | 5.60675 |
| 0 | 5.48014 |
| 0 | 6.73616 |
| 0 | 5.39244 |
| 0 | 8.05823 |
| 0 | 7.18246 |
| 0 | 5.29999 |
| 0 | 6.63062 |
| 0 | 6.19497 |
| 0 | 5.45178 |
| 0 | 5.41723 |
| 0 | 5.40718 |
| 0 | 6.16669 |
| 0 | 5.65505 |
| 0 | 5.6053  |
| 0 | 6.06588 |
| 0 | 5.37555 |
| 0 | 6.42101 |
| 0 | 5.71524 |
| 0 | 6.20388 |
| 0 | 5.38324 |
| 0 | 6.13383 |
| 0 | 7.42281 |
| 0 | 8.75838 |
| 0 | 6.12186 |
| 0 | 6.00527 |
| 0 | 6.55716 |
| 0 | 6.44317 |
| 0 | 12.0016 |
| 0 | 6.03066 |

|   |         |
|---|---------|
| 0 | 7.59386 |
| 0 | 7.13654 |
| 0 | 5.26086 |
| 0 | 5.32249 |
| 0 | 5.70702 |
| 0 | 8.31663 |
| 0 | 6.32696 |
| 0 | 5.86583 |
| 0 | 5.64563 |
| 0 | 6.2018  |
| 0 | 7.32022 |
| 0 | 5.32715 |
| 0 | 5.58554 |
| 0 | 6.19488 |
| 0 | 6.46567 |
| 0 | 5.91192 |
| 0 | 5.99271 |
| 0 | 5.29378 |
| 0 | 7.29029 |
| 0 | 6.05994 |
| 0 | 6.27623 |
| 0 | 5.27796 |
| 0 | 6.06984 |
| 0 | 7.23797 |
| 0 | 5.355   |
| 0 | 7.164   |
| 0 | 5.65957 |
| 0 | 5.71205 |
| 0 | 5.279   |
| 0 | 6.37693 |
| 0 | 5.39002 |
| 0 | 5.8938  |
| 0 | 6.07359 |
| 0 | 6.07359 |
| 0 | 7.16794 |
| 0 | 5.26358 |
| 0 | 5.97818 |
| 0 | 6.35896 |
| 0 | 6.08359 |
| 0 | 5.34883 |
| 0 | 5.59383 |
| 0 | 6.28795 |
| 0 | 5.52776 |
| 0 | 6.12742 |
| 0 | 6.00342 |
| 0 | 5.49208 |
| 0 | 6.05665 |

|   |         |
|---|---------|
| 0 | 6.47841 |
| 0 | 6.42417 |
| 0 | 6.05901 |
| 0 | 6.30806 |
| 0 | 6.14135 |
| 0 | 5.29667 |
| 0 | 7.06169 |
| 0 | 6.0132  |
| 0 | 6.0132  |
| 0 | 5.39934 |
| 0 | 5.65689 |
| 0 | 9.13212 |
| 0 | 5.61043 |
| 0 | 7.49515 |
| 0 | 13.2819 |
| 0 | 8.77802 |
| 0 | 5.65718 |
| 0 | 9.08637 |
| 0 | 6.70154 |
| 0 | 5.78423 |
| 0 | 5.58157 |
| 0 | 9.57536 |
| 0 | 6.58956 |
| 0 | 6.23032 |
| 0 | 5.4342  |
| 0 | 8.08457 |
| 0 | 5.37191 |
| 0 | 10.0284 |
| 0 | 5.36488 |
| 0 | 5.36488 |
| 0 | 9.04528 |
| 0 | 5.25482 |
| 0 | 6.11077 |
| 0 | 7.06515 |
| 0 | 6.2075  |
| 0 | 10.2738 |
| 0 | 6.19355 |
| 0 | 6.16909 |
| 0 | 6.04124 |
| 0 | 8.02449 |



**Gene List G4+/- H3K14ac High Fat Diet**

| chromosome | feature start | feature end | feature      | chromosome | region start | region end |
|------------|---------------|-------------|--------------|------------|--------------|------------|
| 1          | 195060346     | 195077006   | NM_144817    | chr1       | 195066413    | 195067332  |
| 1          | 192875592     | 192889955   | NM_007498    | chr1       | 192880895    | 192882002  |
| 1          | 191481431     | 191489959   | D31842       | chr1       | 191487511    | 191488114  |
| 1          | 188655296     | 188670703   | NM_033077    | chr1       | 188659274    | 188659882  |
| 1          | 186502357     | 186517985   | BC028441     | chr1       | 186514936    | 186515636  |
| 1          | 186430782     | 186439396   | NM_008250    | chr1       | 186432945    | 186433689  |
| 1          | 182734984     | 182743483   | NM_133705    | chr1       | 182736510    | 182737102  |
| 1          | 182418606     | 182427105   | AF126717     | chr1       | 182424054    | 182425129  |
| 1          | 182317535     | 182326143   | BC120654     | chr1       | 182324055    | 182325308  |
| 2          | 181638371     | 181647608   | NM_011012    | chr2       | 181646279    | 181647006  |
| 2          | 181143423     | 181151922   | NM_199312    | chr2       | 181149690    | 181150382  |
| 2          | 180847816     | 180856344   | NM_173761    | chr2       | 180854595    | 180855326  |
| 2          | 180602336     | 180610835   | BC044755     | chr2       | 180604803    | 180605397  |
| 2          | 180531839     | 180541386   | BC030945     | chr2       | 180533987    | 180534586  |
| 1          | 179560489     | 179568988   | NM_027077    | chr1       | 179565847    | 179566690  |
| 2          | 178098757     | 178107256   | NM_001007154 | chr2       | 178104085    | 178105627  |
| 2          | 178065425     | 178074133   | NM_028806    | chr2       | 178072268    | 178072907  |
| 1          | 177462868     | 177471367   | NM_133809    | chr1       | 177470556    | 177471329  |
| 1          | 175982156     | 175997949   | NM_146305    | chr1       | 175985939    | 175986633  |
| 1          | 175930135     | 175938634   | NM_001011844 | chr1       | 175933442    | 175934206  |
| 1          | 175872608     | 175889549   | NM_146717    | chr1       | 175880777    | 175881396  |
| 1          | 175865886     | 175874466   | NM_008327    | chr1       | 175867516    | 175868332  |
| 1          | 175201776     | 175210370   | NM_053199    | chr1       | 175206888    | 175207853  |
| 1          | 175179229     | 175187728   | BC029659     | chr1       | 175184484    | 175185107  |
| 1          | 175100822     | 175109321   | NM_146651    | chr1       | 175106860    | 175107713  |
| 1          | 174787443     | 174795942   | NM_008763    | chr1       | 174789080    | 174789794  |
| 1          | 174729127     | 174737718   | NM_011318    | chr1       | 174732978    | 174733590  |
| 1          | 174386613     | 174399080   | NM_177723    | chr1       | 174389271    | 174390177  |
| 1          | 174306049     | 174323453   | NM_033608    | chr1       | 174320021    | 174320771  |
| 1          | 173219687     | 173228186   | NM_001005508 | chr1       | 173221407    | 173221993  |
| 1          | 172849601     | 172858135   | NM_144559    | chr1       | 172856058    | 172856659  |
| 1          | 172747117     | 172755616   | NM_001029984 | chr1       | 172748913    | 172750099  |
| 2          | 172637063     | 172645633   | NM_175112    | chr2       | 172643626    | 172644147  |
| 2          | 172580733     | 172589232   | NM_007557    | chr2       | 172584767    | 172585602  |
| 2          | 172056208     | 172064707   | NM_024199    | chr2       | 172057733    | 172058809  |
| 1          | 171803345     | 171811880   | NM_010476    | chr1       | 171809804    | 171810420  |
| 1          | 171486176     | 171494714   | NM_009063    | chr1       | 171488562    | 171489253  |
| 1          | 169520233     | 169528811   | NM_033652    | chr1       | 169523243    | 169524023  |
| 1          | 169227973     | 169236472   | NM_025569    | chr1       | 169233915    | 169234507  |
| 2          | 168643965     | 168652474   | NM_009564    | chr2       | 168650372    | 168651226  |
| 1          | 167769076     | 167777575   | NM_198934    | chr1       | 167776750    | 167777563  |
| 1          | 166994775     | 167003448   | NM_032005    | chr1       | 167001591    | 167002177  |
| 2          | 165050825     | 165059324   | NM_001005425 | chr2       | 165053668    | 165054264  |
| 2          | 164966547     | 164975046   | BC064092     | chr2       | 164973736    | 164974933  |

|   |   |           |           |              |      |           |           |
|---|---|-----------|-----------|--------------|------|-----------|-----------|
|   | 1 | 164817303 | 164827205 | NM_008030    | chr1 | 164820698 | 164821373 |
|   | 2 | 164298905 | 164307404 | NM_001012725 | chr2 | 164306619 | 164307359 |
|   | 2 | 164302332 | 164310831 | AY757956     | chr2 | 164306619 | 164307359 |
|   | 2 | 164018206 | 164026705 | NM_009301    | chr2 | 164025635 | 164026463 |
|   | 2 | 163927207 | 163935706 | NM_017390    | chr2 | 163928512 | 163929151 |
|   | 1 | 163325332 | 163333875 | NM_183391    | chr1 | 163331813 | 163332427 |
|   | 2 | 162672987 | 162686890 | NM_013731    | chr2 | 162681999 | 162682605 |
|   | 2 | 162672987 | 162686890 | NM_013731    | chr2 | 162672982 | 162673622 |
| X |   | 161821260 | 161833713 | NM_019773    | chrX | 161827420 | 161828057 |
|   | 1 | 160190438 | 160199003 | NM_207583    | chr1 | 160193221 | 160193820 |
|   | 1 | 160193033 | 160201888 | NM_007495    | chr1 | 160193221 | 160193820 |
| X |   | 159836008 | 159853010 | NM_027027    | chrX | 159846653 | 159847279 |
|   | 3 | 159768988 | 159777487 | NM_026582    | chr3 | 159776224 | 159776836 |
|   | 3 | 159768988 | 159777487 | NM_026582    | chr3 | 159769962 | 159770877 |
|   | 3 | 159529602 | 159538109 | NM_029987    | chr3 | 159531230 | 159532185 |
| X |   | 159102866 | 159111434 | NM_028842    | chrX | 159110138 | 159110870 |
|   | 1 | 158773709 | 158782276 | NM_023884    | chr1 | 158773707 | 158774381 |
|   | 1 | 158669700 | 158678199 | NM_028333    | chr1 | 158669640 | 158670534 |
|   | 1 | 158553088 | 158561689 | NM_145413    | chr1 | 158557386 | 158558203 |
|   | 2 | 157991934 | 158000545 | NM_008489    | chr2 | 157996016 | 157996622 |
| X |   | 157055732 | 157064231 | NM_198409    | chrX | 157062206 | 157062901 |
|   | 2 | 156695978 | 156704516 | NM_025853    | chr2 | 156696268 | 156696891 |
| X |   | 155046706 | 155055268 | NM_021389    | chrX | 155053129 | 155053795 |
|   | 4 | 154800118 | 154808651 | NM_026125    | chr4 | 154801042 | 154801684 |
|   | 4 | 154707367 | 154715882 | NM_028020    | chr4 | 154709290 | 154710005 |
|   | 3 | 154186767 | 154195266 | BC068154     | chr3 | 154189652 | 154190725 |
|   | 4 | 154187044 | 154195572 | NM_001039079 | chr4 | 154187649 | 154188750 |
|   | 4 | 154087780 | 154096295 | NM_001033134 | chr4 | 154089647 | 154090251 |
|   | 2 | 153828326 | 153836839 | NM_011126    | chr2 | 153835684 | 153836315 |
|   | 2 | 153603671 | 153612170 | NM_194357    | chr2 | 153608701 | 153609317 |
|   | 2 | 153560026 | 153568525 | NM_029599    | chr2 | 153564936 | 153566100 |
|   | 2 | 153560486 | 153569030 | NM_025631    | chr2 | 153564936 | 153566100 |
|   | 2 | 153560026 | 153568525 | NM_029599    | chr2 | 153561410 | 153562022 |
|   | 2 | 153560486 | 153569030 | NM_025631    | chr2 | 153561410 | 153562022 |
|   | 1 | 153260515 | 153269041 | NM_011277    | chr1 | 153260557 | 153261166 |
|   | 2 | 153172725 | 153181224 | NM_001001986 | chr2 | 153173757 | 153174380 |
|   | 4 | 153100330 | 153110915 | BC039980     | chr4 | 153103902 | 153104259 |
| X |   | 152940248 | 152948755 | NM_178266    | chrX | 152942381 | 152942978 |
|   | 4 | 152938361 | 152946860 | BC066045     | chr4 | 152941089 | 152942142 |
| X |   | 152940248 | 152948755 | NM_178266    | chrX | 152940576 | 152941252 |
|   | 4 | 152813361 | 152821860 | NM_177673    | chr4 | 152813403 | 152813985 |
|   | 2 | 152793949 | 152802448 | NM_010407    | chr2 | 152800563 | 152801167 |
|   | 2 | 152647947 | 152656446 | NM_029064    | chr2 | 152653871 | 152654676 |
|   | 2 | 152622117 | 152630649 | NM_010226    | chr2 | 152623883 | 152624639 |
|   | 2 | 152289768 | 152298403 | NM_001037247 | chr2 | 152295888 | 152296538 |
|   | 1 | 152075635 | 152084148 | NM_024458    | chr1 | 152081159 | 152082120 |
|   | 2 | 151596773 | 151605272 | NM_009641    | chr2 | 151598489 | 151599587 |

|   |   |           |           |              |      |           |           |
|---|---|-----------|-----------|--------------|------|-----------|-----------|
|   | 3 | 151369273 | 151377829 | NM_133222    | chr3 | 151372255 | 151373024 |
|   | 2 | 151258073 | 151266572 | NM_145535    | chr2 | 151263489 | 151264270 |
|   | 4 | 151214373 | 151226792 | BC098195     | chr4 | 151217705 | 151218724 |
|   | 4 | 150993508 | 151002007 | NM_207687    | chr4 | 151000713 | 151001386 |
|   | 4 | 150996667 | 151005166 | NM_008236    | chr4 | 151000713 | 151001386 |
|   | 4 | 150970172 | 150986125 | NM_207688    | chr4 | 150970459 | 150971337 |
|   | 5 | 150805381 | 150813880 | BC059904     | chr5 | 150806582 | 150807210 |
|   | 2 | 150698274 | 150706773 | NM_207204    | chr2 | 150698983 | 150699642 |
|   | 2 | 150255856 | 150264426 | NM_009977    | chr2 | 150262717 | 150263380 |
|   | 4 | 149897544 | 149907753 | NM_009498    | chr4 | 149901108 | 149901877 |
|   | 4 | 149834897 | 149843410 | NM_011910    | chr4 | 149842568 | 149843154 |
| X |   | 149167009 | 149175508 | NM_001005370 | chrX | 149171538 | 149172335 |
|   | 4 | 148579335 | 148587844 | NM_001025106 | chr4 | 148579431 | 148580412 |
|   | 5 | 147826251 | 147842581 | BC086321     | chr5 | 147829334 | 147830390 |
|   | 5 | 147384376 | 147392887 | NM_080795    | chr5 | 147391899 | 147392461 |
| X |   | 147264073 | 147272572 | BC079665     | chrX | 147269453 | 147270227 |
|   | 4 | 146876883 | 146887586 | NM_010840    | chr4 | 146884921 | 146885675 |
|   | 4 | 146876883 | 146887586 | NM_010840    | chr4 | 146881384 | 146882019 |
|   | 2 | 146875301 | 146883843 | NM_010919    | chr2 | 146880968 | 146881597 |
|   | 4 | 146823699 | 146832199 | NM_008726    | chr4 | 146826130 | 146826727 |
|   | 4 | 146766839 | 146775338 | BC010268     | chr4 | 146774699 | 146775294 |
|   | 6 | 146709628 | 146718130 | AY292400     | chr6 | 146714080 | 146714905 |
|   | 3 | 146528535 | 146537052 | NM_009474    | chr3 | 146531192 | 146531973 |
|   | 3 | 146531375 | 146539998 | BC075661     | chr3 | 146531192 | 146531973 |
| X |   | 146151878 | 146160998 | NM_030700    | chrX | 146157306 | 146158049 |
| X |   | 145987852 | 146004299 | NM_001002272 | chrX | 145989440 | 145990180 |
| X |   | 145924637 | 145933136 | NM_008824    | chrX | 145931565 | 145932173 |
| X |   | 145926324 | 145934865 | NM_029943    | chrX | 145931565 | 145932173 |
|   | 1 | 145495567 | 145506364 | NM_001038592 | chr1 | 145498559 | 145499169 |
|   | 2 | 145471578 | 145480085 | NM_028724    | chr2 | 145478921 | 145479965 |
| X |   | 144929317 | 144937816 | NM_001037716 | chrX | 144933003 | 144934073 |
|   | 7 | 144642044 | 144650543 | NM_008007    | chr7 | 144642233 | 144642893 |
|   | 3 | 144501813 | 144510596 | NM_053102    | chr3 | 144507015 | 144507771 |
|   | 3 | 144504770 | 144513525 | NM_011828    | chr3 | 144507015 | 144507771 |
|   | 7 | 144389282 | 144397826 | NM_010175    | chr7 | 144396932 | 144397644 |
| X |   | 144328683 | 144337182 | NM_011022    | chrX | 144332390 | 144333230 |
|   | 4 | 144153514 | 144162563 | NM_011303    | chr4 | 144161887 | 144162281 |
|   | 5 | 144146058 | 144154594 | NM_025732    | chr5 | 144146066 | 144147222 |
|   | 2 | 143956372 | 143964975 | NM_028984    | chr2 | 143960790 | 143961430 |
|   | 2 | 143959473 | 143968312 | NM_024225    | chr2 | 143960790 | 143961430 |
|   | 5 | 143616478 | 143637731 | NM_133355    | chr5 | 143632975 | 143633679 |
|   | 7 | 143492763 | 143501262 | NM_024290    | chr7 | 143495910 | 143496586 |
| X |   | 143233392 | 143241891 | BC109131     | chrX | 143240748 | 143241404 |
|   | 4 | 143050046 | 143058551 | NM_001007077 | chr4 | 143057768 | 143058530 |
|   | 5 | 142780001 | 142788550 | NM_019943    | chr5 | 142780322 | 142781246 |
|   | 2 | 142763918 | 142772423 | NM_020595    | chr2 | 142769861 | 142770507 |
|   | 7 | 142706857 | 142715356 | NM_009377    | chr7 | 142712287 | 142712916 |

|   |   |           |           |              |      |           |           |
|---|---|-----------|-----------|--------------|------|-----------|-----------|
|   | 6 | 142427675 | 142436179 | NM_145572    | chr6 | 142432273 | 142433286 |
|   | 6 | 142277673 | 142286203 | NM_130861    | chr6 | 142278759 | 142279514 |
|   | 7 | 142238367 | 142254357 | NM_018802    | chr7 | 142249901 | 142250491 |
| X |   | 142202881 | 142211380 | NM_008312    | chrX | 142205867 | 142206730 |
|   | 3 | 142104106 | 142112605 | Z23143       | chr3 | 142110697 | 142111311 |
|   | 7 | 141709278 | 141717805 | NM_023764    | chr7 | 141716427 | 141717042 |
|   | 7 | 141504140 | 141512640 | NM_181729    | chr7 | 141507315 | 141508177 |
|   | 7 | 141504140 | 141512640 | NM_181729    | chr7 | 141504670 | 141505663 |
|   | 6 | 141480842 | 141489455 | NM_021471    | chr6 | 141487456 | 141488397 |
|   | 3 | 141396951 | 141405460 | NM_009472    | chr3 | 141399529 | 141400604 |
|   | 7 | 141292976 | 141330256 | NM_009842    | chr7 | 141324073 | 141324685 |
|   | 1 | 141312138 | 141320643 | NM_031164    | chr1 | 141319719 | 141320358 |
|   | 7 | 141278170 | 141301312 | NM_022654    | chr7 | 141292543 | 141293165 |
|   | 7 | 141292976 | 141330256 | NM_009842    | chr7 | 141292543 | 141293165 |
|   | 2 | 141241117 | 141249616 | NM_001013802 | chr2 | 141246973 | 141247566 |
|   | 7 | 141137326 | 141145825 | NM_007878    | chr7 | 141144236 | 141144831 |
|   | 7 | 140859517 | 140874228 | NM_025378    | chr7 | 140867376 | 140868090 |
|   | 7 | 140799060 | 140813303 | NM_053088    | chr7 | 140805058 | 140805673 |
|   | 6 | 140491581 | 140500080 | BC033481     | chr6 | 140498421 | 140499114 |
|   | 6 | 140408172 | 140416671 | BC006653     | chr6 | 140414718 | 140415555 |
|   | 4 | 140276757 | 140287399 | NM_008546    | chr4 | 140282582 | 140283259 |
|   | 5 | 140217633 | 140226132 | BC059029     | chr5 | 140224097 | 140224779 |
|   | 5 | 140217633 | 140226132 | BC059029     | chr5 | 140218462 | 140219064 |
|   | 7 | 140181184 | 140189683 | NM_001011776 | chr7 | 140184002 | 140184851 |
|   | 7 | 140063587 | 140072330 | NM_172909    | chr7 | 140071627 | 140072255 |
|   | 7 | 140051589 | 140060088 | NM_001011814 | chr7 | 140059158 | 140059979 |
|   | 4 | 140043914 | 140052413 | NM_011061    | chr4 | 140044256 | 140044874 |
|   | 7 | 140021381 | 140029880 | NM_146518    | chr7 | 140025351 | 140026335 |
|   | 7 | 139897907 | 139906406 | NM_010836    | chr7 | 139904448 | 139905191 |
|   | 4 | 139516361 | 139524860 | NM_198610    | chr4 | 139523869 | 139524533 |
|   | 5 | 139040831 | 139049330 | BC004044     | chr5 | 139041389 | 139042015 |
| X |   | 138803637 | 138812136 | BC053403     | chrX | 138811122 | 138811812 |
|   | 4 | 138615987 | 138630387 | U82832       | chr4 | 138622600 | 138623217 |
|   | 4 | 138618669 | 138627168 | NM_146157    | chr4 | 138622600 | 138623217 |
|   | 4 | 138615987 | 138630387 | U82832       | chr4 | 138621365 | 138621972 |
|   | 4 | 138618669 | 138627168 | NM_146157    | chr4 | 138621365 | 138621972 |
|   | 5 | 138453610 | 138462109 | NM_001013773 | chr5 | 138461213 | 138461735 |
|   | 5 | 138453610 | 138462109 | NM_001013773 | chr5 | 138460305 | 138460727 |
|   | 4 | 138233193 | 138251780 | NM_029857    | chr4 | 138249263 | 138250091 |
|   | 6 | 138098733 | 138114357 | NM_019946    | chr6 | 138104809 | 138105397 |
|   | 4 | 138027076 | 138035673 | NM_012045    | chr4 | 138028097 | 138028689 |
|   | 5 | 137793639 | 137803258 | NM_015799    | chr5 | 137796266 | 137797081 |
|   | 1 | 137772887 | 137785660 | BC107028     | chr1 | 137784477 | 137785117 |
|   | 5 | 137426039 | 137434538 | BC058768     | chr5 | 137434196 | 137436245 |
|   | 6 | 137368933 | 137377432 | U37465       | chr6 | 137373149 | 137373903 |
|   | 1 | 137254724 | 137263223 | BC025914     | chr1 | 137257285 | 137258204 |
|   | 5 | 137240713 | 137255006 | NM_021719    | chr5 | 137252936 | 137253993 |

|   |    |           |           |              |       |           |           |
|---|----|-----------|-----------|--------------|-------|-----------|-----------|
|   | 4  | 137065884 | 137074399 | NM_007431    | chr4  | 137065893 | 137066859 |
|   | 6  | 136912719 | 136921240 | NM_023898    | chr6  | 136917966 | 136918825 |
|   | 6  | 136789805 | 136805646 | NM_021714    | chr6  | 136801410 | 136802026 |
|   | 2  | 136217627 | 136226261 | NM_175667    | chr2  | 136224158 | 136224899 |
|   | 1  | 136196351 | 136206824 | NM_173771    | chr1  | 136203999 | 136204678 |
|   | 2  | 136187351 | 136195938 | BC034902     | chr2  | 136190000 | 136190802 |
|   | 1  | 136100400 | 136108933 | NM_031189    | chr1  | 136101935 | 136102552 |
|   | 5  | 136085517 | 136094016 | NM_021403    | chr5  | 136088942 | 136089681 |
|   | 5  | 136085517 | 136094016 | NM_021403    | chr5  | 136087056 | 136087654 |
|   | 1  | 135992875 | 136001391 | NM_007695    | chr1  | 136000389 | 136000788 |
|   | 3  | 135626219 | 135634934 | NM_008689    | chr3  | 135634032 | 135634640 |
|   | 3  | 135626219 | 135634934 | NM_008689    | chr3  | 135630015 | 135630760 |
|   | 7  | 135532015 | 135540514 | BC053453     | chr7  | 135535312 | 135536129 |
|   | 5  | 135447022 | 135455618 | NM_009745    | chr5  | 135447509 | 135448363 |
|   | 7  | 135369824 | 135378764 | NM_011212    | chr7  | 135374320 | 135375198 |
|   | 1  | 135143421 | 135157272 | NM_178260    | chr1  | 135152490 | 135153156 |
|   | 6  | 134529976 | 134538606 | NM_008514    | chr6  | 134536356 | 134537021 |
|   | 5  | 134421525 | 134430639 | BC026208     | chr5  | 134427387 | 134428449 |
|   | 1  | 133829422 | 133837921 | NM_007923    | chr1  | 133834872 | 133835884 |
|   | 6  | 133816847 | 133825363 | NM_010594    | chr6  | 133819742 | 133820653 |
|   | 1  | 133784513 | 133800654 | NM_145977    | chr1  | 133793866 | 133794538 |
|   | 7  | 133609204 | 133617733 | NM_025850    | chr7  | 133609897 | 133610854 |
| X |    | 132911913 | 132920462 | NM_030688    | chrX  | 132916574 | 132917219 |
|   | 7  | 132861636 | 132870135 | AF016508     | chr7  | 132864906 | 132865720 |
|   | 7  | 132851334 | 132859833 | BC017520     | chr7  | 132856272 | 132857011 |
|   | 1  | 132764327 | 132772826 | NM_001009940 | chr1  | 132771861 | 132772478 |
|   | 1  | 132736333 | 132744997 | NM_021380    | chr1  | 132737219 | 132738586 |
|   | 6  | 132714423 | 132730324 | NM_199153    | chr6  | 132718486 | 132719673 |
|   | 4  | 132532643 | 132541163 | NM_031393    | chr4  | 132532851 | 132533489 |
| X |    | 132078371 | 132093973 | NM_019768    | chrX  | 132088094 | 132088685 |
| X |    | 132082146 | 132090645 | NM_001033001 | chrX  | 132088094 | 132088685 |
|   | 2  | 131177384 | 131185933 | NM_145533    | chr2  | 131183333 | 131183999 |
|   | 4  | 131163807 | 131172306 | NM_020587    | chr4  | 131166683 | 131167337 |
| X |    | 131083056 | 131094382 | NM_026081    | chrX  | 131087761 | 131088623 |
|   | 2  | 130919508 | 130932675 | NM_144888    | chr2  | 130924509 | 130925145 |
|   | 7  | 130817224 | 130825723 | NM_007769    | chr7  | 130824764 | 130825708 |
|   | 7  | 130817224 | 130825723 | NM_007769    | chr7  | 130823308 | 130824224 |
|   | 2  | 130752487 | 130761255 | NM_033615    | chr2  | 130752756 | 130753507 |
|   | 7  | 130561301 | 130569800 | AB036742     | chr7  | 130567474 | 130568336 |
|   | 7  | 130477704 | 130486203 | NM_021314    | chr7  | 130485758 | 130486487 |
|   | 8  | 130320799 | 130329298 | BC025186     | chr8  | 130327715 | 130328381 |
|   | 8  | 130179698 | 130188201 | NM_001013580 | chr8  | 130184856 | 130185250 |
|   | 7  | 130050717 | 130063956 | NM_010207    | chr7  | 130056322 | 130056928 |
| X |    | 129941609 | 129950135 | NM_019868    | chrX  | 129944225 | 129944840 |
| X |    | 129944794 | 129953309 | NM_013463    | chrX  | 129944225 | 129944840 |
|   | 2  | 129808726 | 129817238 | NM_177726    | chr2  | 129814429 | 129815366 |
|   | 10 | 129744137 | 129760889 | NM_183264    | chr10 | 129750764 | 129751802 |

|    |           |           |              |       |           |           |
|----|-----------|-----------|--------------|-------|-----------|-----------|
| 1  | 129595710 | 129604209 | NM_028399    | chr1  | 129600058 | 129600696 |
| 6  | 129551475 | 129561680 | NM_010654    | chr6  | 129556598 | 129557456 |
| 4  | 129481468 | 129489967 | NM_173071    | chr4  | 129483106 | 129483916 |
| 6  | 129356990 | 129365778 | NM_019985    | chr6  | 129358546 | 129359146 |
| 2  | 129225544 | 129234043 | NM_177653    | chr2  | 129229954 | 129230848 |
| 10 | 129202973 | 129211472 | NM_146552    | chr10 | 129206355 | 129206971 |
| 6  | 129064023 | 129072532 | NM_153506    | chr6  | 129067403 | 129068753 |
| 10 | 129056757 | 129070429 | NM_146548    | chr10 | 129063630 | 129064267 |
| 2  | 129055338 | 129067069 | NM_177848    | chr2  | 129062794 | 129063393 |
| 10 | 128967606 | 128976105 | NM_146378    | chr10 | 128971581 | 128972304 |
| 6  | 128622005 | 128630527 | NM_053165    | chr6  | 128627997 | 128628754 |
| 8  | 128614319 | 128622896 | NM_025636    | chr8  | 128617340 | 128617829 |
| 8  | 128549956 | 128558455 | NM_028908    | chr8  | 128555538 | 128556267 |
| 10 | 128494422 | 128502921 | NM_146864    | chr10 | 128498074 | 128498774 |
| 10 | 128386798 | 128395297 | NM_146861    | chr10 | 128391917 | 128392771 |
| 10 | 128330762 | 128339266 | NM_008398    | chr10 | 128332955 | 128333338 |
| 4  | 128185099 | 128193598 | BC057571     | chr4  | 128191098 | 128192084 |
| 3  | 127798387 | 127806886 | BC002199     | chr3  | 127804112 | 127804744 |
| 4  | 127760696 | 127769197 | NM_027036    | chr4  | 127767865 | 127769170 |
| 10 | 127664946 | 127687305 | NM_019963    | chr10 | 127684331 | 127685288 |
| 8  | 127602229 | 127610748 | NM_026855    | chr8  | 127603443 | 127604532 |
| 7  | 127270804 | 127279303 | BC027193     | chr7  | 127275036 | 127275721 |
| 10 | 127263425 | 127271950 | NM_145424    | chr10 | 127269250 | 127269897 |
| 10 | 127246877 | 127255376 | NM_147222    | chr10 | 127253813 | 127254424 |
| 2  | 127210252 | 127218811 | NM_019789    | chr2  | 127217739 | 127218338 |
| 10 | 127198103 | 127206632 | NM_009040    | chr10 | 127204484 | 127205022 |
| 10 | 127136487 | 127146962 | NM_198035    | chr10 | 127142059 | 127143153 |
| 2  | 127048727 | 127057226 | NM_009633    | chr2  | 127056127 | 127056712 |
| 6  | 126975161 | 126983660 | NM_010204    | chr6  | 126982326 | 126983031 |
| 10 | 126911927 | 126920426 | BC099496     | chr10 | 126914399 | 126915029 |
| 6  | 126902665 | 126911174 | NM_009013    | chr6  | 126910546 | 126911136 |
| 4  | 126852273 | 126866468 | NM_010291    | chr4  | 126864464 | 126865069 |
| 4  | 126852273 | 126866468 | NM_010291    | chr4  | 126852767 | 126853774 |
| 6  | 126703271 | 126712460 | NM_013568    | chr6  | 126710160 | 126710801 |
| 8  | 126686115 | 126694614 | NM_009003    | chr8  | 126688834 | 126689796 |
| 4  | 126665575 | 126677683 | NM_198618    | chr4  | 126671491 | 126672138 |
| 10 | 126470688 | 126479213 | NM_025982    | chr10 | 126478025 | 126478934 |
| 10 | 126475856 | 126484355 | NM_001033263 | chr10 | 126478025 | 126478934 |
| 10 | 126460552 | 126469063 | NM_009870    | chr10 | 126463378 | 126464395 |
| 10 | 126460634 | 126469133 | NM_001033262 | chr10 | 126463378 | 126464395 |
| 7  | 126434519 | 126443018 | NM_029339    | chr7  | 126436681 | 126437340 |
| 7  | 126203485 | 126211984 | NM_009844    | chr7  | 126207494 | 126208547 |
| 7  | 126185375 | 126193885 | NM_010900    | chr7  | 126190959 | 126191696 |
| 5  | 125759311 | 125767853 | NM_030210    | chr5  | 125760063 | 125760613 |
| 5  | 125677188 | 125685707 | NM_019639    | chr5  | 125683362 | 125683970 |
| 7  | 125496337 | 125504836 | NM_207239    | chr7  | 125504249 | 125504807 |
| 6  | 125194980 | 125208646 | NM_145391    | chr6  | 125207190 | 125207561 |

|    |           |           |              |       |           |           |
|----|-----------|-----------|--------------|-------|-----------|-----------|
| 6  | 125009308 | 125018093 | NM_016845    | chr6  | 125013793 | 125014506 |
| 5  | 124999285 | 125007784 | AF388674     | chr5  | 124999284 | 124999813 |
| 6  | 124842813 | 124859828 | NM_013488    | chr6  | 124850727 | 124851815 |
| 5  | 124736354 | 124744853 | NM_030259    | chr5  | 124744060 | 124744462 |
| 5  | 124737773 | 124746272 | NM_029532    | chr5  | 124744060 | 124744462 |
| 8  | 124483284 | 124496574 | BC009020     | chr8  | 124483403 | 124484804 |
| 6  | 124452753 | 124461268 | NM_181344    | chr6  | 124459561 | 124460204 |
| 6  | 124452753 | 124461268 | NM_181344    | chr6  | 124455365 | 124456100 |
| 4  | 124377203 | 124386658 | NM_177671    | chr4  | 124383367 | 124384453 |
| 2  | 124295737 | 124304942 | NM_172537    | chr2  | 124299226 | 124299838 |
| 6  | 124264275 | 124272825 | NM_053094    | chr6  | 124270700 | 124271602 |
| 5  | 124123605 | 124132114 | NM_030701    | chr5  | 124128367 | 124128988 |
| 8  | 123964451 | 123975442 | NM_010426    | chr8  | 123967799 | 123968573 |
| 9  | 123824707 | 123833206 | NM_007718    | chr9  | 123827978 | 123828553 |
| 9  | 123697768 | 123706267 | NM_148925    | chr9  | 123697909 | 123698504 |
| 8  | 123368843 | 123377342 | NM_198671    | chr8  | 123374567 | 123375418 |
| 7  | 123203291 | 123211790 | BC058379     | chr7  | 123206440 | 123207916 |
| 9  | 122959294 | 122967888 | NM_026917    | chr9  | 122967120 | 122967759 |
| 8  | 122872453 | 122880952 | NM_030209    | chr8  | 122874958 | 122875733 |
| 8  | 122742282 | 122750781 | NM_146219    | chr8  | 122749890 | 122750483 |
| 3  | 122553462 | 122566788 | NM_153118    | chr3  | 122563815 | 122564605 |
| 2  | 122467440 | 122478883 | NM_021507    | chr2  | 122473012 | 122473615 |
| 2  | 122467440 | 122478883 | NM_021507    | chr2  | 122468335 | 122468894 |
| 8  | 122431247 | 122439746 | BC054837     | chr8  | 122433465 | 122434097 |
| 6  | 122416496 | 122425004 | BC096392     | chr6  | 122419847 | 122420761 |
| 2  | 121984341 | 121992853 | NM_025777    | chr2  | 121986543 | 121987320 |
| 7  | 121852346 | 121860851 | NM_138589    | chr7  | 121855016 | 121855612 |
| 3  | 121412563 | 121421063 | NM_028044    | chr3  | 121420256 | 121420953 |
| 2  | 121274926 | 121283425 | BC057549     | chr2  | 121282369 | 121283215 |
| 11 | 121262092 | 121270618 | NM_029878    | chr11 | 121269516 | 121270120 |
| 2  | 121192211 | 121204702 | BC094676     | chr2  | 121192566 | 121193040 |
| 5  | 121165625 | 121174128 | NM_145211    | chr5  | 121169717 | 121170692 |
| 5  | 121169468 | 121177982 | NM_133893    | chr5  | 121169717 | 121170692 |
| 5  | 121145700 | 121154230 | NM_011852    | chr5  | 121149604 | 121150428 |
| 14 | 121048455 | 121056954 | NM_182806    | chr14 | 121056264 | 121056938 |
| 14 | 121048455 | 121056954 | NM_182806    | chr14 | 121051698 | 121052742 |
| 6  | 121044710 | 121053209 | NM_153396    | chr6  | 121051584 | 121052571 |
| 11 | 120970361 | 120978881 | NM_145440    | chr11 | 120975911 | 120977087 |
| 10 | 120780175 | 120788674 | BC059047     | chr10 | 120786710 | 120787394 |
| 8  | 120554993 | 120565619 | NM_028725    | chr8  | 120561951 | 120563029 |
| 2  | 120539109 | 120548045 | NM_001024856 | chr2  | 120540121 | 120540986 |
| 10 | 120431064 | 120439789 | NM_011915    | chr10 | 120432097 | 120432841 |
| 9  | 120146771 | 120155270 | NM_144557    | chr9  | 120148146 | 120149015 |
| 11 | 120089226 | 120103037 | NM_198423    | chr11 | 120098872 | 120099524 |
| 2  | 120003107 | 120011606 | NM_001024145 | chr2  | 120005545 | 120006638 |
| 9  | 119992440 | 120005908 | NM_008614    | chr9  | 120004498 | 120005070 |
| 9  | 119992440 | 120005908 | NM_008614    | chr9  | 119993087 | 119993929 |

|    |           |           |              |       |           |           |
|----|-----------|-----------|--------------|-------|-----------|-----------|
| 9  | 119914440 | 119922981 | NM_009987    | chr9  | 119918324 | 119918888 |
| 9  | 119914440 | 119922981 | NM_009987    | chr9  | 119917240 | 119917914 |
| 11 | 119900409 | 119908908 | NM_009734    | chr11 | 119908307 | 119908885 |
| 11 | 119900409 | 119908908 | NM_009734    | chr11 | 119905697 | 119906287 |
| 12 | 119699034 | 119707564 | BC085086     | chr12 | 119699544 | 119700313 |
| 7  | 119681441 | 119693759 | NM_029610    | chr7  | 119690755 | 119691351 |
| 7  | 119684053 | 119692825 | NM_173408    | chr7  | 119690755 | 119691351 |
| 4  | 119590610 | 119599109 | L07911       | chr4  | 119595421 | 119596006 |
| 7  | 119475239 | 119483738 | NM_178414    | chr7  | 119482263 | 119482916 |
| 14 | 119454136 | 119462635 | BC075665     | chr14 | 119458585 | 119459177 |
| 6  | 119293853 | 119302352 | NM_172492    | chr6  | 119297698 | 119298451 |
| 11 | 119290891 | 119299390 | NM_001040005 | chr11 | 119292756 | 119293385 |
| 2  | 119230455 | 119245068 | NM_172857    | chr2  | 119243752 | 119244362 |
| 2  | 119230455 | 119245068 | NM_172857    | chr2  | 119239076 | 119239705 |
| 2  | 119233148 | 119241744 | NM_019769    | chr2  | 119239076 | 119239705 |
| 10 | 119216449 | 119225071 | NM_028736    | chr10 | 119224003 | 119224600 |
| 11 | 119165647 | 119174146 | NM_178743    | chr11 | 119168801 | 119169398 |
| 11 | 119169101 | 119177628 | NM_018822    | chr11 | 119168801 | 119169398 |
| 4  | 119129647 | 119138169 | NM_008190    | chr4  | 119136525 | 119137172 |
| 4  | 119129647 | 119138169 | NM_008190    | chr4  | 119132898 | 119134062 |
| 2  | 118974198 | 118982772 | NM_172269    | chr2  | 118976186 | 118976722 |
| 7  | 118973098 | 118981597 | NM_001024138 | chr7  | 118975914 | 118976856 |
| 9  | 118895476 | 118914645 | NM_011700    | chr9  | 118903227 | 118904408 |
| 4  | 118713601 | 118722149 | NM_029198    | chr4  | 118717953 | 118718716 |
| 2  | 118611965 | 118620520 | NM_028117    | chr2  | 118616102 | 118616763 |
| 4  | 118360715 | 118369214 | NM_001011856 | chr4  | 118364553 | 118365217 |
| 4  | 118325871 | 118334370 | NM_207157    | chr4  | 118328820 | 118329439 |
| 12 | 118279870 | 118288369 | NM_146040    | chr12 | 118280947 | 118282058 |
| 4  | 118249969 | 118258468 | NM_207152    | chr4  | 118252305 | 118252903 |
| 11 | 118229385 | 118241176 | NM_029502    | chr11 | 118235831 | 118236416 |
| 13 | 118142169 | 118150818 | BC021881     | chr13 | 118146888 | 118147854 |
| 2  | 118085888 | 118094387 | AF193344     | chr2  | 118089363 | 118090080 |
| 14 | 117786107 | 117794616 | NM_023878    | chr14 | 117790109 | 117790709 |
| 14 | 117786107 | 117794616 | NM_023878    | chr14 | 117788151 | 117789009 |
| 5  | 117546077 | 117554617 | U43206       | chr5  | 117553580 | 117554103 |
| 4  | 117377251 | 117395935 | NM_026344    | chr4  | 117392336 | 117393109 |
| 4  | 117224754 | 117233253 | AF178961     | chr4  | 117228379 | 117228983 |
| 2  | 117031659 | 117040318 | NM_011246    | chr2  | 117031681 | 117032609 |
| 5  | 116705340 | 116713839 | BC024130     | chr5  | 116708105 | 116708609 |
| 11 | 116664105 | 116672604 | NM_178620    | chr11 | 116672065 | 116672558 |
| 11 | 116666663 | 116675181 | NM_011358    | chr11 | 116672065 | 116672558 |
| 11 | 116481764 | 116490263 | BC055707     | chr11 | 116489610 | 116490214 |
| 11 | 116394638 | 116403537 | NM_173755    | chr11 | 116400537 | 116400927 |
| 6  | 116375912 | 116384411 | BC049768     | chr6  | 116377438 | 116378050 |
| 10 | 116374220 | 116383324 | BC010763     | chr10 | 116376835 | 116377658 |
| 3  | 116242224 | 116251458 | NM_022427    | chr3  | 116248088 | 116248803 |
| 13 | 116208335 | 116217703 | NM_134058    | chr13 | 116215714 | 116216421 |



|    |           |           |              |       |           |           |
|----|-----------|-----------|--------------|-------|-----------|-----------|
| 11 | 116051682 | 116060181 | NM_025276    | chr11 | 116053826 | 116054512 |
| 13 | 116050420 | 116061944 | NM_008396    | chr13 | 116050581 | 116051195 |
| 7  | 115978491 | 115986990 | NM_172743    | chr7  | 115985822 | 115986406 |
| 6  | 115958084 | 115966583 | NM_026376    | chr6  | 115958188 | 115959186 |
| 11 | 115944608 | 115960896 | NM_178802    | chr11 | 115949865 | 115950493 |
| 3  | 115704281 | 115713051 | NM_007901    | chr3  | 115705389 | 115706376 |
| 11 | 115426094 | 115435019 | NM_027162    | chr11 | 115433248 | 115433899 |
| 13 | 115269971 | 115278470 | NM_177004    | chr13 | 115274589 | 115275332 |
| 6  | 115214949 | 115223468 | NM_080639    | chr6  | 115219243 | 115220282 |
| 11 | 115133015 | 115141514 | AB087504     | chr11 | 115135948 | 115136608 |
| 11 | 115135492 | 115144008 | NM_176847    | chr11 | 115135948 | 115136608 |
| 11 | 115117253 | 115125752 | NM_172801    | chr11 | 115123797 | 115124955 |
| 12 | 115029341 | 115037840 | BC018315     | chr12 | 115030050 | 115030680 |
| 10 | 114989391 | 114997890 | NM_010195    | chr10 | 114995471 | 114996499 |
| 11 | 114964268 | 114972774 | NM_021411    | chr11 | 114967217 | 114967812 |
| 11 | 114700131 | 114708911 | NM_170758    | chr11 | 114701418 | 114702011 |
| 4  | 114629410 | 114637909 | NM_001003947 | chr4  | 114636075 | 114637037 |
| 4  | 114629410 | 114637909 | NM_001003947 | chr4  | 114631840 | 114632715 |
| 11 | 114609014 | 114617513 | NM_181749    | chr11 | 114613119 | 114613802 |
| 11 | 114609466 | 114617982 | NM_028055    | chr11 | 114613119 | 114613802 |
| X  | 114538179 | 114546761 | BC111833     | chrX  | 114545778 | 114546413 |
| 9  | 114443953 | 114452452 | BC047204     | chr9  | 114447535 | 114448148 |
| 4  | 114421446 | 114429945 | NM_015758    | chr4  | 114429256 | 114429853 |
| 12 | 114377460 | 114386224 | BC092269     | chr12 | 114380180 | 114380894 |
| 8  | 114277989 | 114286488 | NM_178086    | chr8  | 114284075 | 114284615 |
| 9  | 114172833 | 114181332 | NM_007535    | chr9  | 114175351 | 114176060 |
| 5  | 114088933 | 114097474 | NM_009151    | chr5  | 114094103 | 114095000 |
| 6  | 113561989 | 113572492 | NM_027633    | chr6  | 113563226 | 113563967 |
| 5  | 113548523 | 113557022 | NM_172718    | chr5  | 113555384 | 113556004 |
| 5  | 113548523 | 113557022 | NM_172718    | chr5  | 113549685 | 113550268 |
| 12 | 113516310 | 113525095 | NM_029381    | chr12 | 113519381 | 113519976 |
| 11 | 113494500 | 113507095 | NM_177777    | chr11 | 113499631 | 113500777 |
| 11 | 113497495 | 113506151 | NM_138598    | chr11 | 113499631 | 113500777 |
| 12 | 113411202 | 113419701 | BC058112     | chr12 | 113416900 | 113417764 |
| 6  | 113402380 | 113410911 | NM_026365    | chr6  | 113409153 | 113409848 |
| 11 | 113379353 | 113387858 | NM_027216    | chr11 | 113385637 | 113386279 |
| 11 | 113379353 | 113387858 | NM_027216    | chr11 | 113383338 | 113384013 |
| 12 | 113374804 | 113383303 | NM_010588    | chr12 | 113381459 | 113382154 |
| 12 | 113374804 | 113383303 | NM_010588    | chr12 | 113380425 | 113381024 |
| 7  | 113299043 | 113307566 | NM_026143    | chr7  | 113304965 | 113305591 |
| 12 | 113086397 | 113095219 | NM_013929    | chr12 | 113087658 | 113088252 |
| 8  | 113054836 | 113063335 | NM_007586    | chr8  | 113058901 | 113059541 |
| 6  | 112909774 | 112918691 | AF496547     | chr6  | 112909993 | 112910602 |
| 13 | 112876542 | 112885041 | L13103       | chr13 | 112878232 | 112878862 |
| 5  | 112577398 | 112587754 | NM_138646    | chr5  | 112580846 | 112581710 |
| 5  | 112580827 | 112589326 | BC125007     | chr5  | 112580846 | 112581710 |
| 8  | 112465678 | 112474177 | NM_017370    | chr8  | 112468834 | 112469492 |

|    |           |           |              |       |           |           |
|----|-----------|-----------|--------------|-------|-----------|-----------|
| 8  | 112452231 | 112460730 | NM_178380    | chr8  | 112458935 | 112459731 |
| 6  | 112419278 | 112427967 | NM_007617    | chr6  | 112423691 | 112424504 |
| 2  | 112160348 | 112174866 | NM_026519    | chr2  | 112167940 | 112168798 |
| 9  | 112028305 | 112038806 | NM_033264    | chr9  | 112031685 | 112032735 |
| 2  | 111841370 | 111849869 | NM_146362    | chr2  | 111846887 | 111847678 |
| 1  | 111815531 | 111824030 | AY267034     | chr1  | 111823023 | 111823592 |
| 12 | 111712906 | 111721418 | NM_033603    | chr12 | 111713657 | 111714259 |
| 2  | 111672193 | 111680692 | NM_146401    | chr2  | 111674273 | 111674882 |
| 4  | 111394202 | 111406728 | NM_145551    | chr4  | 111394403 | 111395213 |
| 9  | 111277929 | 111286428 | NM_172928    | chr9  | 111285094 | 111285906 |
| 12 | 111254295 | 111262794 | BC039981     | chr12 | 111260354 | 111261014 |
| 2  | 111068728 | 111077231 | NM_146396    | chr2  | 111071301 | 111072435 |
| 2  | 111051956 | 111060455 | NM_146395    | chr2  | 111058384 | 111059038 |
| 4  | 110925160 | 110933659 | BC051512     | chr4  | 110932970 | 110933638 |
| 4  | 110925160 | 110933659 | BC051512     | chr4  | 110930780 | 110931602 |
| 5  | 110887776 | 110896275 | NM_027156    | chr5  | 110889385 | 110890403 |
| 10 | 110871336 | 110887678 | NM_015781    | chr10 | 110887231 | 110887726 |
| 12 | 110721037 | 110729566 | NM_172119    | chr12 | 110721072 | 110721682 |
| 9  | 110683322 | 110705282 | NM_146227    | chr9  | 110699494 | 110700577 |
| 5  | 110568162 | 110576661 | BC002275     | chr5  | 110571677 | 110572763 |
| 2  | 110516416 | 110526257 | NM_172979    | chr2  | 110523804 | 110524352 |
| 9  | 110466680 | 110475209 | NM_026012    | chr9  | 110466671 | 110467472 |
| 10 | 110318286 | 110326811 | NM_007792    | chr10 | 110319628 | 110320114 |
| 9  | 110259007 | 110267515 | NM_008694    | chr9  | 110264907 | 110265522 |
| 4  | 109847342 | 109855841 | AF041341     | chr4  | 109851133 | 109851772 |
| 7  | 109570223 | 109579202 | NM_020610    | chr7  | 109572320 | 109572965 |
| 2  | 109518219 | 109526718 | BC034862     | chr2  | 109522600 | 109523478 |
| 7  | 109512449 | 109528909 | NM_001040700 | chr7  | 109513785 | 109514379 |
| 4  | 109469957 | 109478484 | NM_172296    | chr4  | 109472498 | 109473221 |
| 1  | 109411562 | 109420117 | NM_011459    | chr1  | 109416999 | 109417611 |
| 11 | 109286800 | 109295686 | NM_001029842 | chr11 | 109293599 | 109294201 |
| 12 | 109281057 | 109289683 | NM_181328    | chr12 | 109285709 | 109286380 |
| 11 | 109172884 | 109181529 | NM_010303    | chr11 | 109178998 | 109179648 |
| 9  | 109050869 | 109059381 | NM_177598    | chr9  | 109055079 | 109055709 |
| 9  | 108933906 | 108955497 | NM_172775    | chr9  | 108953924 | 108954993 |
| 8  | 108942732 | 108951231 | NM_010901    | chr8  | 108945248 | 108946095 |
| 1  | 108908528 | 108917027 | NM_201376    | chr1  | 108910989 | 108911860 |
| 9  | 108837111 | 108851452 | NM_173019    | chr9  | 108842700 | 108843317 |
| 9  | 108837111 | 108851452 | NM_173019    | chr9  | 108841036 | 108841716 |
| 9  | 108804682 | 108813181 | NM_007738    | chr9  | 108806248 | 108806847 |
| 1  | 108768074 | 108776578 | BC062134     | chr1  | 108775376 | 108776006 |
| 1  | 108755996 | 108764495 | NM_027971    | chr1  | 108761760 | 108762529 |
| 9  | 108705260 | 108714460 | NM_134420    | chr9  | 108713338 | 108713935 |
| 7  | 108540035 | 108548534 | NM_146723    | chr7  | 108542161 | 108542811 |
| 3  | 108541051 | 108549550 | NM_017392    | chr3  | 108541120 | 108542172 |
| 7  | 108498497 | 108506996 | NM_146724    | chr7  | 108501609 | 108502485 |
| 4  | 108492619 | 108501236 | NM_146150    | chr4  | 108499151 | 108499768 |

|    |           |           |              |       |           |           |
|----|-----------|-----------|--------------|-------|-----------|-----------|
| 8  | 108452555 | 108463427 | NM_013477    | chr8  | 108456745 | 108457540 |
| 7  | 108329704 | 108338203 | NM_001011527 | chr7  | 108331907 | 108332590 |
| 3  | 108271620 | 108288938 | NM_175470    | chr3  | 108281457 | 108282234 |
| 5  | 108224825 | 108233335 | NM_026062    | chr5  | 108227196 | 108228164 |
| 9  | 108142541 | 108157514 | NM_025449    | chr9  | 108150554 | 108151135 |
| 3  | 108143345 | 108152029 | NM_010358    | chr3  | 108143450 | 108144342 |
| 8  | 107809399 | 107817919 | NM_172759    | chr8  | 107812584 | 107813510 |
| 14 | 107793591 | 107802090 | NM_199065    | chr14 | 107798927 | 107799538 |
| 11 | 107724939 | 107737145 | NM_080644    | chr11 | 107732791 | 107733413 |
| 9  | 107535194 | 107543716 | NM_008140    | chr9  | 107541836 | 107542670 |
| 11 | 107480704 | 107489203 | BC060114     | chr11 | 107485653 | 107486607 |
| 11 | 107480704 | 107489203 | BC060114     | chr11 | 107482633 | 107483405 |
| 9  | 107452642 | 107473342 | NM_001042779 | chr9  | 107464657 | 107465326 |
| 3  | 107364209 | 107373763 | NM_001044382 | chr3  | 107366603 | 107367429 |
| 3  | 107223623 | 107232122 | NM_008417    | chr3  | 107225889 | 107226547 |
| 11 | 107022999 | 107035022 | BC028271     | chr11 | 107033888 | 107034503 |
| 8  | 106984815 | 106993327 | NM_009868    | chr8  | 106986674 | 106987568 |
| 10 | 106887745 | 106896244 | NM_008656    | chr10 | 106888347 | 106889091 |
| 11 | 106733986 | 106742485 | NM_025481    | chr11 | 106735639 | 106736238 |
| 9  | 106674077 | 106682576 | NM_001015507 | chr9  | 106676300 | 106676788 |
| 9  | 106331762 | 106340752 | NM_145619    | chr9  | 106339104 | 106339776 |
| 3  | 106293090 | 106301595 | NM_009892    | chr3  | 106294838 | 106295631 |
| 4  | 106225838 | 106234346 | NM_146149    | chr4  | 106226562 | 106227162 |
| 3  | 106036192 | 106044691 | BC038878     | chr3  | 106036204 | 106036905 |
| 3  | 106026477 | 106034976 | NM_009631    | chr3  | 106032045 | 106032657 |
| 8  | 105671641 | 105680240 | NM_009866    | chr8  | 105672135 | 105672823 |
| 5  | 105650077 | 105658576 | NM_001033550 | chr5  | 105655109 | 105655706 |
| 6  | 105637549 | 105646127 | NM_173004    | chr6  | 105642698 | 105643300 |
| 3  | 105574386 | 105582885 | NM_001039347 | chr3  | 105578306 | 105578973 |
| 2  | 105463735 | 105488220 | NM_013627    | chr2  | 105467948 | 105468619 |
| 7  | 105440264 | 105448763 | BC048395     | chr7  | 105448320 | 105448786 |
| 7  | 105236051 | 105244550 | NM_146355    | chr7  | 105239243 | 105240024 |
| 7  | 105201530 | 105217535 | NM_147061    | chr7  | 105215670 | 105216301 |
| 7  | 105201530 | 105217535 | NM_147061    | chr7  | 105211513 | 105212433 |
| 12 | 105130540 | 105139039 | AB081470     | chr12 | 105132830 | 105133472 |
| 14 | 104985804 | 104994305 | NM_198601    | chr14 | 104992281 | 104993157 |
| 3  | 104943781 | 104952298 | NM_008619    | chr3  | 104945050 | 104946018 |
| 7  | 104538525 | 104555038 | NM_147050    | chr7  | 104551146 | 104551784 |
| 12 | 104523046 | 104531562 | NM_173024    | chr12 | 104527384 | 104527988 |
| 3  | 104493175 | 104501674 | NM_001013805 | chr3  | 104493939 | 104494846 |
| 12 | 104388441 | 104396971 | NM_199314    | chr12 | 104393709 | 104394303 |
| 5  | 104149032 | 104157531 | NM_178741    | chr5  | 104152694 | 104153330 |
| 7  | 104051728 | 104060227 | NM_146751    | chr7  | 104057057 | 104057550 |
| 7  | 104036138 | 104044637 | NM_172905    | chr7  | 104040966 | 104041548 |
| 12 | 104027549 | 104038494 | NM_144834    | chr12 | 104034341 | 104035009 |
| 7  | 104014571 | 104030367 | NM_198623    | chr7  | 104024435 | 104025075 |
| 7  | 104014571 | 104030367 | NM_198623    | chr7  | 104015802 | 104016405 |

|    |           |           |              |       |           |           |
|----|-----------|-----------|--------------|-------|-----------|-----------|
| 9  | 103982779 | 103991278 | NM_145700    | chr9  | 103989440 | 103990132 |
| 9  | 103916048 | 103924583 | NM_175324    | chr9  | 103919232 | 103919980 |
| 9  | 103918840 | 103927466 | NM_025692    | chr9  | 103919232 | 103919980 |
| 2  | 103822638 | 103831236 | NM_212433    | chr2  | 103825089 | 103826032 |
| 12 | 103640697 | 103649196 | NM_133364    | chr12 | 103642515 | 103643121 |
| 11 | 103563375 | 103571911 | NM_011719    | chr11 | 103568813 | 103569446 |
| 6  | 103470649 | 103479148 | NM_007697    | chr6  | 103474571 | 103475309 |
| 7  | 103451845 | 103460344 | NM_146841    | chr7  | 103454974 | 103455796 |
| 7  | 103319160 | 103327659 | NM_147094    | chr7  | 103327029 | 103327623 |
| 12 | 103294356 | 103302855 | NM_001039049 | chr12 | 103300200 | 103301444 |
| 5  | 103276493 | 103284992 | AB005665     | chr5  | 103281357 | 103281844 |
| 9  | 103221189 | 103229823 | NM_175565    | chr9  | 103223159 | 103223880 |
| 9  | 103143922 | 103152447 | NM_027918    | chr9  | 103144478 | 103145097 |
| 7  | 103044957 | 103053456 | NM_001011847 | chr7  | 103046421 | 103047059 |
| 11 | 103032009 | 103040522 | NM_177801    | chr11 | 103032022 | 103032475 |
| 5  | 103003098 | 103011597 | BC023344     | chr5  | 103003477 | 103004163 |
| 15 | 102831596 | 102844541 | NM_175730    | chr15 | 102835280 | 102836150 |
| 15 | 102812573 | 102821072 | NM_010466    | chr15 | 102817586 | 102818256 |
| 14 | 102726859 | 102736081 | NM_007904    | chr14 | 102727796 | 102728767 |
| 9  | 102687067 | 102695846 | NM_013649    | chr9  | 102691023 | 102691630 |
| 3  | 102592989 | 102601491 | NM_013609    | chr3  | 102599432 | 102600045 |
| 7  | 102526644 | 102535143 | NM_147103    | chr7  | 102529724 | 102530362 |
| 7  | 102460063 | 102468562 | NM_146755    | chr7  | 102462683 | 102463585 |
| 7  | 102402570 | 102418258 | NM_147079    | chr7  | 102406494 | 102407132 |
| 3  | 102331170 | 102339669 | NM_177545    | chr3  | 102337476 | 102338564 |
| 13 | 102044663 | 102053168 | BC012687     | chr13 | 102044779 | 102045716 |
| 7  | 101933332 | 101959436 | NM_011644    | chr7  | 101958091 | 101958722 |
| 11 | 101851638 | 101860153 | NM_027987    | chr11 | 101853855 | 101854229 |
| 7  | 101764238 | 101782293 | NM_025605    | chr7  | 101775885 | 101776742 |
| 15 | 101765859 | 101774358 | NM_146063    | chr15 | 101773301 | 101773909 |
| 3  | 101731165 | 101739745 | NM_144900    | chr3  | 101738060 | 101738792 |
| 7  | 101728516 | 101750602 | NM_008034    | chr7  | 101731946 | 101732592 |
| 15 | 101695153 | 101703652 | NM_001003667 | chr15 | 101696660 | 101697452 |
| 15 | 101588972 | 101597471 | NM_001003669 | chr15 | 101595502 | 101595897 |
| 15 | 101568627 | 101577143 | NM_019956    | chr15 | 101574521 | 101575292 |
| 15 | 101568627 | 101577143 | NM_019956    | chr15 | 101568815 | 101569709 |
| 11 | 101543046 | 101551545 | NM_144831    | chr11 | 101544580 | 101545140 |
| 15 | 101388444 | 101396984 | NM_177717    | chr15 | 101392701 | 101393395 |
| 15 | 101388444 | 101396984 | NM_177717    | chr15 | 101390387 | 101391449 |
| 15 | 101376194 | 101384701 | NM_053249    | chr15 | 101379942 | 101380706 |
| 15 | 101358302 | 101366810 | NM_008474    | chr15 | 101360335 | 101361474 |
| 12 | 101286401 | 101294931 | NM_175493    | chr12 | 101286903 | 101288551 |
| 12 | 101174156 | 101189691 | NM_145448    | chr12 | 101179346 | 101179801 |
| 6  | 101132815 | 101141314 | BC010329     | chr6  | 101134976 | 101135523 |
| 15 | 100996159 | 101004658 | NM_007395    | chr15 | 101000605 | 101001107 |
| 15 | 100755463 | 100766850 | AF049617     | chr15 | 100765492 | 100765992 |
| 15 | 100755463 | 100766850 | AF049617     | chr15 | 100763696 | 100764295 |

|   |    |           |           |              |       |           |           |
|---|----|-----------|-----------|--------------|-------|-----------|-----------|
|   | 7  | 100734983 | 100743490 | NM_177073    | chr7  | 100738085 | 100738829 |
|   | 11 | 100664132 | 100672816 | BC024319     | chr11 | 100671390 | 100672012 |
|   | 11 | 100669493 | 100679136 | NM_011488    | chr11 | 100671390 | 100672012 |
|   | 7  | 100574738 | 100583288 | NM_178764    | chr7  | 100581225 | 100581834 |
|   | 6  | 100564771 | 100573274 | BC094903     | chr6  | 100570196 | 100570789 |
|   | 11 | 100517772 | 100534544 | NM_001038010 | chr11 | 100521516 | 100522154 |
|   | 13 | 100438943 | 100450985 | NM_173757    | chr13 | 100449126 | 100449761 |
|   | 15 | 100291128 | 100302940 | NM_134093    | chr15 | 100301845 | 100302449 |
|   | 13 | 100278980 | 100287479 | NM_001004149 | chr13 | 100283635 | 100284526 |
|   | 1  | 100245530 | 100254059 | BC112423     | chr1  | 100252202 | 100252914 |
| X |    | 100160948 | 100175393 | AF197105     | chrX  | 100169212 | 100169831 |
|   | 15 | 100156954 | 100165462 | AB253945     | chr15 | 100162418 | 100163380 |
|   | 11 | 100006837 | 100015336 | NM_201255    | chr11 | 100011950 | 100013092 |
|   | 11 | 99901704  | 99918315  | NM_016880    | chr11 | 99911655  | 99912458  |
|   | 7  | 99635247  | 99643746  | NM_146356    | chr7  | 99641213  | 99642038  |
|   | 11 | 99623483  | 99631982  | NM_027087    | chr11 | 99625182  | 99625962  |
| X |    | 99611186  | 99619700  | NM_009440    | chrX  | 99614342  | 99615025  |
|   | 12 | 99590031  | 99598530  | BC029185     | chr12 | 99596113  | 99596721  |
|   | 12 | 99590031  | 99598530  | BC029185     | chr12 | 99591151  | 99591797  |
|   | 15 | 99539621  | 99556250  | NM_010271    | chr15 | 99551033  | 99551928  |
|   | 11 | 99457655  | 99472271  | NM_029613    | chr11 | 99457683  | 99458243  |
|   | 11 | 99394607  | 99457174  | NM_001039502 | chr11 | 99397251  | 99398024  |
|   | 5  | 99274793  | 99283653  | NM_008926    | chr5  | 99281709  | 99282069  |
|   | 6  | 99229465  | 99237978  | NM_053202    | chr6  | 99234506  | 99235125  |
|   | 10 | 99186645  | 99195346  | NM_027945    | chr10 | 99189770  | 99190510  |
|   | 11 | 99151545  | 99160057  | NM_001033397 | chr11 | 99156282  | 99156650  |
|   | 15 | 99117273  | 99133814  | NM_018786    | chr15 | 99127974  | 99128886  |
| X |    | 98999682  | 99009451  | BC116811     | chrX  | 99006886  | 99007547  |
| X |    | 98999682  | 99009451  | BC116811     | chrX  | 99001025  | 99001765  |
|   | 3  | 98772089  | 98780595  | NM_008295    | chr3  | 98777512  | 98778591  |
|   | 15 | 98759922  | 98768458  | NM_011654    | chr15 | 98765000  | 98765619  |
|   | 4  | 98610434  | 98618933  | NM_026082    | chr4  | 98615478  | 98616603  |
|   | 4  | 98610434  | 98618933  | NM_026082    | chr4  | 98611166  | 98611783  |
|   | 10 | 98553510  | 98562009  | BC119390     | chr10 | 98561064  | 98561890  |
|   | 11 | 98474441  | 98482951  | NM_021347    | chr11 | 98481517  | 98482129  |
|   | 4  | 98465477  | 98473976  | BC024823     | chr4  | 98472782  | 98473343  |
|   | 3  | 98461897  | 98470452  | NM_172863    | chr3  | 98465108  | 98466096  |
|   | 4  | 98455862  | 98464361  | BC024917     | chr4  | 98461260  | 98462177  |
|   | 15 | 98319508  | 98328007  | NM_001001807 | chr15 | 98325241  | 98326664  |
|   | 15 | 98308218  | 98316717  | NM_010679    | chr15 | 98310117  | 98312236  |
|   | 3  | 98223852  | 98232351  | BC059256     | chr3  | 98231598  | 98232315  |
|   | 16 | 98075014  | 98083537  | NM_174847    | chr16 | 98078011  | 98078753  |
|   | 3  | 97980632  | 97989185  | NM_011342    | chr3  | 97987863  | 97988452  |
|   | 3  | 97980632  | 97989185  | NM_011342    | chr3  | 97982834  | 97983442  |
|   | 11 | 97897758  | 97906257  | BC004087     | chr11 | 97899145  | 97899739  |
|   | 11 | 97866900  | 97875552  | NM_146028    | chr11 | 97868828  | 97869524  |
|   | 15 | 97830149  | 97838691  | NM_031163    | chr15 | 97834196  | 97834812  |

|   |    |          |                    |       |          |          |
|---|----|----------|--------------------|-------|----------|----------|
|   | 11 | 97799957 | 97808470 NM_028199 | chr11 | 97802069 | 97802635 |
|   | 7  | 97789147 | 97797646 NM_177696 | chr7  | 97794308 | 97795131 |
|   | 15 | 97786313 | 97794812 NM_201359 | chr15 | 97786653 | 97787591 |
|   | 3  | 97773652 | 97782151 BC046620  | chr3  | 97775610 | 97776612 |
|   | 3  | 97708280 | 97716954 NM_010232 | chr3  | 97712220 | 97712805 |
|   | 16 | 97657300 | 97665852 NM_020622 | chr16 | 97658342 | 97659014 |
| X |    | 97574056 | 97589368 NM_008124 | chrX  | 97582859 | 97583470 |
| X |    | 97574056 | 97589368 NM_008124 | chrX  | 97580004 | 97580866 |
|   | 3  | 97494085 | 97502584 NM_146275 | chr3  | 97496453 | 97497102 |
|   | 13 | 97483047 | 97491578 NM_026173 | chr13 | 97489655 | 97490265 |
|   | 16 | 97455672 | 97464186 NM_019517 | chr16 | 97457820 | 97458332 |
|   | 3  | 97299413 | 97307912 NM_029933 | chr3  | 97301619 | 97302220 |
|   | 15 | 97183047 | 97191546 BC038822  | chr15 | 97184960 | 97185427 |
|   | 1  | 97138029 | 97146649 NM_026321 | chr1  | 97138075 | 97138680 |
|   | 8  | 97055913 | 97070883 NM_013602 | chr8  | 97060394 | 97060991 |
|   | 8  | 97055913 | 97070883 NM_013602 | chr8  | 97058500 | 97059081 |
|   | 10 | 97030871 | 97039396 NM_008438 | chr10 | 97038755 | 97039365 |
|   | 10 | 96989491 | 96998017 NM_008524 | chr10 | 96996189 | 96997199 |
|   | 11 | 96975437 | 96983936 BC004096  | chr11 | 96977407 | 96978257 |
|   | 7  | 96950943 | 96959467 NM_010248 | chr7  | 96953635 | 96954407 |
|   | 3  | 96909531 | 96918030 NM_021517 | chr3  | 96917108 | 96917836 |
|   | 3  | 96909531 | 96918030 NM_021517 | chr3  | 96913325 | 96914090 |
|   | 15 | 96881491 | 96889990 NM_027052 | chr15 | 96881804 | 96882431 |
|   | 7  | 96820719 | 96829218 NM_153591 | chr7  | 96825591 | 96826251 |
|   | 13 | 96791619 | 96800155 NM_010170 | chr13 | 96793122 | 96793761 |
|   | 3  | 96376875 | 96385374 NM_010186 | chr3  | 96384130 | 96384884 |
|   | 16 | 96379942 | 96388441 NM_033149 | chr16 | 96383356 | 96383995 |
|   | 9  | 96244287 | 96253490 NM_177770 | chr9  | 96250618 | 96251220 |
|   | 12 | 96168509 | 96177008 AY495669  | chr12 | 96175159 | 96176031 |
|   | 11 | 96109164 | 96122181 NM_008268 | chr11 | 96114090 | 96114727 |
|   | 11 | 95834635 | 95853546 NM_033568 | chr11 | 95849955 | 95850592 |
|   | 9  | 95758112 | 95766611 NM_011916 | chr9  | 95759195 | 95760090 |
|   | 4  | 95561128 | 95575558 NM_145548 | chr4  | 95570388 | 95571178 |
|   | 1  | 95313529 | 95322028 NM_010891 | chr1  | 95316805 | 95317419 |
|   | 16 | 95103673 | 95112494 NM_010606 | chr16 | 95107838 | 95108472 |
|   | 13 | 94772533 | 94781052 NM_022884 | chr13 | 94778203 | 94778820 |
|   | 16 | 94486710 | 94495209 NM_009441 | chr16 | 94493401 | 94494011 |
|   | 1  | 94469892 | 94485247 NM_153114 | chr1  | 94473912 | 94474529 |
|   | 6  | 94459811 | 94468315 NM_026255 | chr6  | 94465629 | 94466599 |
|   | 1  | 94444287 | 94452786 NM_206896 | chr1  | 94447619 | 94448247 |
|   | 4  | 94418313 | 94426830 NM_027089 | chr4  | 94425408 | 94426165 |
|   | 1  | 94339970 | 94348469 NM_147039 | chr1  | 94344817 | 94345454 |
|   | 13 | 93893012 | 93901511 NM_011582 | chr13 | 93900360 | 93901187 |
|   | 16 | 93645722 | 93654221 BC057081  | chr16 | 93650046 | 93650634 |
|   | 17 | 93497312 | 93506212 NM_009625 | chr17 | 93502795 | 93503397 |
|   | 5  | 93457343 | 93465842 NM_181728 | chr5  | 93462480 | 93463493 |
|   | 13 | 93364326 | 93372825 BC040784  | chr13 | 93365868 | 93366624 |

|    |          |          |           |       |          |          |
|----|----------|----------|-----------|-------|----------|----------|
| 3  | 93098569 | 93110463 | NM_025420 | chr3  | 93101781 | 93102784 |
| 10 | 93065000 | 93073665 | NM_021320 | chr10 | 93071434 | 93072042 |
| 10 | 93016984 | 93025483 | BC100499  | chr10 | 93019789 | 93020317 |
| 11 | 92908500 | 92918687 | NM_028296 | chr11 | 92916155 | 92916986 |
| 3  | 92847969 | 92856468 | NM_026335 | chr3  | 92852740 | 92853407 |
| 6  | 92775982 | 92784481 | NM_175209 | chr6  | 92776674 | 92777731 |
| 3  | 92655684 | 92665118 | NM_008412 | chr3  | 92663716 | 92664135 |
| 1  | 92605385 | 92613902 | BC057903  | chr1  | 92611201 | 92611980 |
| 3  | 92583397 | 92591896 | NM_173070 | chr3  | 92586244 | 92587016 |
| 16 | 92583688 | 92592187 | NM_009821 | chr16 | 92585216 | 92585831 |
| 3  | 92521676 | 92530182 | NM_009265 | chr3  | 92524589 | 92525180 |
| 3  | 92431546 | 92440045 | NM_011471 | chr3  | 92437598 | 92438694 |
| 2  | 92406612 | 92415111 | NM_023850 | chr2  | 92413962 | 92414613 |
| 16 | 92207801 | 92216300 | NM_029252 | chr16 | 92211406 | 92211885 |
| 2  | 92170337 | 92186256 | NM_145122 | chr2  | 92179656 | 92180400 |
| 6  | 92098498 | 92107799 | NM_011630 | chr6  | 92106826 | 92107754 |
| 8  | 92075174 | 92083673 | BC098233  | chr8  | 92082378 | 92082987 |
| 9  | 92048019 | 92056553 | AF159593  | chr9  | 92048505 | 92049512 |
| 6  | 91938382 | 91955113 | NM_172731 | chr6  | 91953911 | 91954624 |
| 2  | 91822471 | 91831009 | NM_011957 | chr2  | 91826601 | 91827261 |
| X  | 91678314 | 91686848 | NM_080858 | chrX  | 91680527 | 91681614 |
| 5  | 91559937 | 91568450 | NM_007423 | chr5  | 91567175 | 91567827 |
| 11 | 91391122 | 91399645 | NM_028547 | chr11 | 91393097 | 91393796 |
| 8  | 91156508 | 91165007 | NM_007406 | chr8  | 91163841 | 91164686 |
| 16 | 90942877 | 90951376 | BC032975  | chr16 | 90945201 | 90945795 |
| 2  | 90830466 | 90839029 | NM_009023 | chr2  | 90836494 | 90837207 |
| 4  | 90798375 | 90806874 | AY035380  | chr4  | 90802295 | 90803410 |
| 4  | 90798375 | 90806874 | AY035380  | chr4  | 90800766 | 90801445 |
| 8  | 90746919 | 90755418 | AF188609  | chr8  | 90750555 | 90751199 |
| 5  | 90596628 | 90605127 | NM_133192 | chr5  | 90600517 | 90601473 |
| 6  | 90187443 | 90195942 | NM_053226 | chr6  | 90193270 | 90193852 |
| 6  | 90187443 | 90195942 | NM_053226 | chr6  | 90189315 | 90190250 |
| 1  | 90144135 | 90152634 | AY095352  | chr1  | 90148335 | 90149063 |
| 1  | 90098080 | 90114750 | NM_198652 | chr1  | 90111289 | 90111913 |
| 6  | 90066779 | 90075278 | NM_053225 | chr6  | 90072388 | 90073525 |
| 9  | 90066163 | 90074662 | NM_194334 | chr9  | 90071737 | 90072733 |
| 2  | 90051326 | 90059825 | NM_146984 | chr2  | 90055432 | 90056507 |
| 1  | 90034388 | 90042919 | NM_008299 | chr1  | 90040646 | 90041253 |
| 1  | 90037130 | 90045629 | NM_201645 | chr1  | 90040646 | 90041253 |
| 16 | 90030129 | 90038628 | BC065126  | chr16 | 90032589 | 90033306 |
| 9  | 90017850 | 90026349 | BC056467  | chr9  | 90021249 | 90021889 |
| 6  | 89981392 | 89989891 | NM_053219 | chr6  | 89986946 | 89987649 |
| 6  | 89935675 | 89944174 | NM_053229 | chr6  | 89937869 | 89938453 |
| 3  | 89853543 | 89862713 | NM_027315 | chr3  | 89860530 | 89861124 |
| 3  | 89856668 | 89865167 | NM_028726 | chr3  | 89860530 | 89861124 |
| 11 | 89840438 | 89852177 | NM_026433 | chr11 | 89851014 | 89851604 |
| 2  | 89831760 | 89840259 | NM_146343 | chr2  | 89839601 | 89840212 |

|    |          |                       |       |          |          |
|----|----------|-----------------------|-------|----------|----------|
| 17 | 89816245 | 89824755 D55720       | chr17 | 89816432 | 89817084 |
| 2  | 89809730 | 89818229 NM_146794    | chr2  | 89811708 | 89812304 |
| 6  | 89705928 | 89714485 NM_053230    | chr6  | 89711596 | 89712476 |
| 7  | 89501914 | 89510509 NM_181407    | chr7  | 89510226 | 89511201 |
| 1  | 89501410 | 89509909 AF184912     | chr1  | 89509062 | 89509720 |
| 3  | 89486221 | 89494720 NM_020517    | chr3  | 89487236 | 89487912 |
| 3  | 89433387 | 89441937 NM_001037722 | chr3  | 89438533 | 89439182 |
| 1  | 89419721 | 89428220 NM_015750    | chr1  | 89421512 | 89422387 |
| 2  | 89408487 | 89425029 NM_146966    | chr2  | 89418115 | 89418790 |
| 7  | 89399868 | 89408367 BC018517     | chr7  | 89400677 | 89401313 |
| 15 | 89390093 | 89399607 NM_013455    | chr15 | 89396395 | 89397116 |
| 7  | 89390279 | 89398778 NM_029614    | chr7  | 89393478 | 89394080 |
| 1  | 89311385 | 89319884 BC022680     | chr1  | 89313168 | 89313882 |
| 16 | 89290128 | 89298663 NM_028621    | chr16 | 89296532 | 89297592 |
| 1  | 89258291 | 89266790 BC027137     | chr1  | 89265922 | 89266562 |
| 11 | 89232539 | 89241038 NM_172534    | chr11 | 89238960 | 89239559 |
| 2  | 89205417 | 89213916 NM_146790    | chr2  | 89207717 | 89208375 |
| 5  | 89155117 | 89163653 NM_021289    | chr5  | 89162532 | 89163148 |
| 15 | 89119775 | 89128274 BC029156     | chr15 | 89125609 | 89126199 |
| 18 | 89099983 | 89108482 NM_175542    | chr18 | 89104853 | 89105529 |
| 18 | 89018975 | 89034409 NM_018821    | chr18 | 89022496 | 89023374 |
| 9  | 88991102 | 88999688 NM_007534    | chr9  | 88993402 | 88994055 |
| 6  | 88837186 | 88846620 NM_176973    | chr6  | 88840355 | 88841348 |
| 15 | 88779326 | 88788176 NM_172818    | chr15 | 88785588 | 88786234 |
| 4  | 88763271 | 88771850 NM_009877    | chr4  | 88770601 | 88771229 |
| 16 | 88755770 | 88779948 NM_130870    | chr16 | 88755803 | 88756410 |
| 2  | 88659446 | 88667945 NM_001001810 | chr2  | 88667083 | 88667927 |
| 16 | 88660566 | 88669065 NM_027170    | chr16 | 88666250 | 88667053 |
| 15 | 88641412 | 88649960 NM_029720    | chr15 | 88641756 | 88642364 |
| 15 | 88641523 | 88653051 NM_145477    | chr15 | 88641756 | 88642364 |
| 3  | 88631643 | 88644854 NM_016899    | chr3  | 88634452 | 88635091 |
| 2  | 88612012 | 88620511 NM_146462    | chr2  | 88614657 | 88615265 |
| 15 | 88573477 | 88585030 NM_181412    | chr15 | 88582612 | 88583463 |
| 3  | 88452978 | 88461639 NM_031368    | chr3  | 88454094 | 88455099 |
| 10 | 88309791 | 88318335 NM_145423    | chr10 | 88314912 | 88315559 |
| 10 | 88309791 | 88318335 NM_145423    | chr10 | 88310323 | 88310855 |
| 9  | 88194015 | 88202514 BC043328     | chr9  | 88198423 | 88199212 |
| 3  | 88110868 | 88119367 NM_022031    | chr3  | 88112975 | 88113783 |
| 4  | 88061117 | 88080607 NM_177361    | chr4  | 88070816 | 88071413 |
| 6  | 88044152 | 88052656 NM_133933    | chr6  | 88051428 | 88052322 |
| 10 | 88032314 | 88040813 NM_175418    | chr10 | 88032456 | 88033057 |
| 8  | 87944233 | 87975939 NM_010764    | chr8  | 87956618 | 87957487 |
| 3  | 87926682 | 87935471 NM_001025571 | chr3  | 87931736 | 87932273 |
| 3  | 87876989 | 87885488 NM_011832    | chr3  | 87879515 | 87880254 |
| 11 | 87728699 | 87737198 NM_146412    | chr11 | 87730980 | 87731953 |
| 11 | 87639806 | 87648310 NM_080420    | chr11 | 87646010 | 87646618 |
| 5  | 87629108 | 87637615 NM_178730    | chr5  | 87630508 | 87631008 |



|    |          |          |              |       |          |          |
|----|----------|----------|--------------|-------|----------|----------|
| 10 | 87570791 | 87580462 | NM_028334    | chr10 | 87573480 | 87574054 |
| 2  | 87552331 | 87560830 | NM_146637    | chr2  | 87556302 | 87556909 |
| 2  | 87470705 | 87479204 | NM_146660    | chr2  | 87471013 | 87471705 |
| 15 | 87446996 | 87455495 | NM_134096    | chr15 | 87448749 | 87449351 |
| 5  | 87399798 | 87408297 | AF539752     | chr5  | 87400226 | 87401287 |
| 10 | 87390470 | 87398969 | M30774       | chr10 | 87390767 | 87391361 |
| 6  | 87352070 | 87360569 | NM_026860    | chr6  | 87358666 | 87359303 |
| 2  | 87320888 | 87335373 | NM_206823    | chr2  | 87331884 | 87332679 |
| 10 | 87255662 | 87264161 | BC028536     | chr10 | 87261742 | 87262319 |
| 17 | 87185212 | 87194034 | NM_028639    | chr17 | 87187344 | 87187956 |
| 8  | 87024394 | 87043858 | NM_145970    | chr8  | 87025615 | 87026236 |
| 18 | 86839303 | 86849740 | NM_172633    | chr18 | 86846385 | 86847260 |
| 18 | 86839303 | 86849740 | NM_172633    | chr18 | 86843706 | 86844611 |
| 6  | 86587808 | 86596307 | DQ841260     | chr6  | 86593435 | 86594114 |
| 18 | 86523145 | 86532311 | NM_144946    | chr18 | 86530414 | 86531087 |
| 8  | 86425198 | 86433697 | NM_146270    | chr8  | 86425256 | 86425909 |
| 10 | 86337298 | 86345797 | AF285583     | chr10 | 86338360 | 86339322 |
| 7  | 86237597 | 86246096 | NM_146616    | chr7  | 86240556 | 86241150 |
| 12 | 86192920 | 86201419 | BC024926     | chr12 | 86196406 | 86197175 |
| 3  | 86165250 | 86173749 | BC031117     | chr3  | 86168682 | 86169280 |
| 12 | 86102584 | 86111115 | NM_145445    | chr12 | 86105301 | 86106455 |
| 15 | 86060915 | 86069414 | BC023106     | chr15 | 86063141 | 86064331 |
| 4  | 85808015 | 85816523 | NM_172542    | chr4  | 85813384 | 85814069 |
| 6  | 85466045 | 85474652 | NM_001001160 | chr6  | 85467264 | 85467854 |
| 2  | 85446659 | 85471294 | NM_013728    | chr2  | 85449490 | 85450139 |
| 10 | 85385083 | 85393592 | NM_145422    | chr10 | 85385300 | 85386390 |
| 2  | 85374054 | 85382553 | NM_146437    | chr2  | 85378016 | 85378642 |
| 12 | 85335170 | 85343669 | NM_173756    | chr12 | 85336096 | 85336922 |
| 12 | 85335566 | 85346751 | NM_134042    | chr12 | 85336096 | 85336922 |
| 2  | 85229167 | 85246076 | NM_146434    | chr2  | 85243755 | 85244369 |
| 10 | 85069002 | 85077501 | BC059036     | chr10 | 85074267 | 85074828 |
| 12 | 84665722 | 84674221 | BC005747     | chr12 | 84672368 | 84673116 |
| 1  | 84621665 | 84630164 | BC004085     | chr1  | 84621730 | 84622328 |
| 1  | 84572387 | 84581246 | NM_152915    | chr1  | 84573261 | 84574046 |
| 12 | 84552172 | 84560671 | BC066150     | chr12 | 84558284 | 84559096 |
| 12 | 84409831 | 84418330 | NM_030246    | chr12 | 84412500 | 84413086 |
| 3  | 84296266 | 84312788 | NM_030706    | chr3  | 84310603 | 84311338 |
| 7  | 84283600 | 84292144 | NM_007488    | chr7  | 84289291 | 84289639 |
| 1  | 84161117 | 84169616 | NM_001003948 | chr1  | 84161129 | 84161934 |
| 15 | 84146486 | 84155031 | NM_022321    | chr15 | 84153530 | 84154208 |
| 15 | 83948442 | 83956941 | NM_029427    | chr15 | 83948798 | 83949534 |
| 11 | 83882018 | 83890774 | NM_019819    | chr11 | 83883060 | 83883655 |
| 7  | 83818022 | 83833782 | BC056981     | chr7  | 83823340 | 83823934 |
| 15 | 83773242 | 83781741 | BC056955     | chr15 | 83780922 | 83781696 |
| 9  | 83672932 | 83681431 | NM_001024729 | chr9  | 83676233 | 83676982 |
| 15 | 83613717 | 83622216 | BC057550     | chr15 | 83619507 | 83620155 |
| 9  | 83600319 | 83608955 | NM_148941    | chr9  | 83605504 | 83606279 |

|    |          |          |              |       |          |          |
|----|----------|----------|--------------|-------|----------|----------|
| 6  | 83280706 | 83289262 | NM_008638    | chr6  | 83286287 | 83286991 |
| 6  | 83285709 | 83294242 | NM_145571    | chr6  | 83286287 | 83286991 |
| 6  | 83116123 | 83124658 | BC126949     | chr6  | 83118158 | 83119122 |
| 3  | 83087784 | 83096322 | NM_133862    | chr3  | 83092639 | 83093239 |
| 6  | 83062783 | 83083663 | NM_020619    | chr6  | 83067191 | 83067824 |
| 11 | 82927040 | 82935543 | NM_011407    | chr11 | 82934264 | 82934797 |
| 15 | 82848405 | 82856904 | NM_028728    | chr15 | 82854022 | 82854464 |
| 9  | 82690591 | 82699090 | AF310251     | chr9  | 82691436 | 82692055 |
| 18 | 82682891 | 82691473 | NM_001025251 | chr18 | 82690515 | 82691103 |
| 15 | 82619501 | 82628011 | NM_029562    | chr15 | 82623402 | 82624291 |
| 8  | 82605188 | 82613812 | NM_015751    | chr8  | 82613091 | 82613707 |
| 18 | 82603551 | 82612119 | NM_001025245 | chr18 | 82610211 | 82611041 |
| 15 | 82446174 | 82454673 | NM_145474    | chr15 | 82447685 | 82448792 |
| 4  | 82403642 | 82412141 | BC088732     | chr4  | 82408467 | 82409066 |
| 4  | 82403642 | 82412141 | BC088732     | chr4  | 82403646 | 82404247 |
| 6  | 82362133 | 82370944 | NM_009313    | chr6  | 82365894 | 82367393 |
| 10 | 82257750 | 82266249 | NM_001042523 | chr10 | 82264480 | 82265121 |
| 10 | 82257750 | 82266249 | NM_001042523 | chr10 | 82261058 | 82261657 |
| 15 | 82232437 | 82240946 | NM_010005    | chr15 | 82234079 | 82235011 |
| 15 | 82179502 | 82188055 | NM_025987    | chr15 | 82186475 | 82187213 |
| 3  | 82158113 | 82166616 | NM_017469    | chr3  | 82159250 | 82160078 |
| 13 | 82045478 | 82053977 | AF405693     | chr13 | 82052110 | 82052734 |
| 13 | 82008219 | 82016718 | AF405694     | chr13 | 82011448 | 82012125 |
| 6  | 81883327 | 81891826 | NM_177884    | chr6  | 81884697 | 81885298 |
| 11 | 81868046 | 81876640 | NM_011330    | chr11 | 81873575 | 81874228 |
| 13 | 81818152 | 81826651 | BC043465     | chr13 | 81820267 | 81820906 |
| 7  | 81689278 | 81697777 | BC031192     | chr7  | 81696920 | 81697516 |
| 15 | 81693718 | 81702261 | NM_080633    | chr15 | 81694750 | 81695425 |
| 12 | 81352888 | 81361387 | NM_177267    | chr12 | 81354731 | 81355375 |
| 3  | 81116343 | 81125666 | NM_019971    | chr3  | 81118582 | 81119452 |
| 12 | 81103423 | 81111922 | AF031663     | chr12 | 81109633 | 81110290 |
| 15 | 81056824 | 81065528 | NM_145132    | chr15 | 81061941 | 81062614 |
| 10 | 81038068 | 81054687 | BC017633     | chr10 | 81044204 | 81044801 |
| 11 | 80966497 | 80975098 | NM_007384    | chr11 | 80970873 | 80971788 |
| 7  | 80772235 | 80784549 | NM_026523    | chr7  | 80776806 | 80777394 |
| 10 | 80720781 | 80734458 | NM_009325    | chr10 | 80729873 | 80730541 |
| 11 | 80668584 | 80677120 | NM_029367    | chr11 | 80669540 | 80670132 |
| 10 | 80630305 | 80638804 | NM_001034895 | chr10 | 80632174 | 80632785 |
| 10 | 80631374 | 80639908 | NM_178662    | chr10 | 80632174 | 80632785 |
| 10 | 80493231 | 80508001 | NM_145365    | chr10 | 80495765 | 80496480 |
| 4  | 80299461 | 80307960 | NM_031202    | chr4  | 80305117 | 80305779 |
| 17 | 80192538 | 80205340 | NM_194269    | chr17 | 80204555 | 80205190 |
| 17 | 80195965 | 80204802 | NM_198942    | chr17 | 80204555 | 80205190 |
| 17 | 80192538 | 80205340 | NM_194269    | chr17 | 80196728 | 80197349 |
| 17 | 80195965 | 80204802 | NM_198942    | chr17 | 80196728 | 80197349 |
| 10 | 80099313 | 80108395 | NM_027829    | chr10 | 80107972 | 80108573 |
| 10 | 80102450 | 80119355 | BC058238     | chr10 | 80107972 | 80108573 |

|    |          |                       |       |          |          |
|----|----------|-----------------------|-------|----------|----------|
| 10 | 80031564 | 80040063 BC005750     | chr10 | 80034817 | 80035705 |
| 12 | 79661764 | 79670360 NM_019579    | chr12 | 79662224 | 79662906 |
| 2  | 79453095 | 79461594 BC018526     | chr2  | 79459960 | 79460584 |
| 11 | 79337386 | 79352804 NM_146023    | chr11 | 79346893 | 79347676 |
| 7  | 79336282 | 79345786 NM_017462    | chr7  | 79338969 | 79340267 |
| 10 | 79251734 | 79267645 NM_001077363 | chr10 | 79265415 | 79266185 |
| 17 | 79257588 | 79266138 NM_026514    | chr17 | 79261913 | 79262673 |
| 2  | 79253392 | 79263479 NM_010894    | chr2  | 79261791 | 79262589 |
| 2  | 79253392 | 79263479 NM_010894    | chr2  | 79257461 | 79258469 |
| 7  | 79255795 | 79264298 NM_020599    | chr7  | 79256207 | 79256902 |
| 10 | 79038405 | 79054867 NM_001033473 | chr10 | 79049788 | 79050567 |
| 10 | 78951038 | 78964220 NM_027422    | chr10 | 78953394 | 78953988 |
| 11 | 78730982 | 78740914 NM_010927    | chr11 | 78734288 | 78735156 |
| 11 | 78510206 | 78519568 NM_008702    | chr11 | 78512246 | 78512837 |
| 14 | 78502889 | 78511455 NM_021543    | chr14 | 78504028 | 78504763 |
| 17 | 78407198 | 78415703 NM_028813    | chr17 | 78411686 | 78412338 |
| 15 | 78397455 | 78406038 NM_009008    | chr15 | 78403221 | 78403795 |
| 14 | 78393725 | 78402325 NM_010701    | chr14 | 78397160 | 78399285 |
| 11 | 78322382 | 78334363 NM_199199    | chr11 | 78328214 | 78329065 |
| 11 | 78309315 | 78322207 NM_011707    | chr11 | 78319810 | 78320474 |
| 11 | 78311399 | 78319949 NM_172795    | chr11 | 78319810 | 78320474 |
| 11 | 78309315 | 78322207 NM_011707    | chr11 | 78317046 | 78317389 |
| 11 | 78311399 | 78319949 NM_172795    | chr11 | 78317046 | 78317389 |
| 9  | 78227895 | 78236407 NM_026658    | chr9  | 78235040 | 78235692 |
| 11 | 78134393 | 78147116 NM_201406    | chr11 | 78136347 | 78136941 |
| 10 | 78116516 | 78127371 NM_009809    | chr10 | 78121359 | 78121979 |
| 6  | 77906594 | 77915097 NM_009819    | chr6  | 77911708 | 77912103 |
| 10 | 77585740 | 77594278 NM_029546    | chr10 | 77586038 | 77586656 |
| 15 | 77550327 | 77558826 NM_173743    | chr15 | 77551201 | 77551785 |
| 11 | 77496350 | 77504849 NM_001024205 | chr11 | 77501087 | 77501702 |
| 5  | 77436018 | 77444563 NM_019515    | chr5  | 77441873 | 77442918 |
| 18 | 77384294 | 77392802 NM_153124    | chr18 | 77386705 | 77387218 |
| 12 | 77317016 | 77325742 NM_008301    | chr12 | 77324118 | 77325070 |
| 10 | 77144360 | 77172719 NM_010670    | chr10 | 77151862 | 77152688 |
| 10 | 77144360 | 77172719 NM_010670    | chr10 | 77149582 | 77150654 |
| 12 | 77093600 | 77102099 NM_207707    | chr12 | 77100782 | 77101635 |
| 14 | 76820630 | 76829162 NM_177629    | chr14 | 76821023 | 76822172 |
| 11 | 76808792 | 76817309 NM_010484    | chr11 | 76812197 | 76813093 |
| 10 | 76800954 | 76809453 AF291049     | chr10 | 76808324 | 76808919 |
| 14 | 76606573 | 76615072 NM_025384    | chr14 | 76609319 | 76609664 |
| 12 | 76547699 | 76556589 BC055860     | chr12 | 76555364 | 76556131 |
| 11 | 76482665 | 76498771 NM_177709    | chr11 | 76497687 | 76498385 |
| 11 | 76482665 | 76498771 NM_177709    | chr11 | 76489760 | 76490428 |
| 15 | 76450783 | 76459329 NM_025842    | chr15 | 76450793 | 76451498 |
| 15 | 76336562 | 76345073 NM_010046    | chr15 | 76339306 | 76340056 |
| 10 | 76264014 | 76272513 BC042440     | chr10 | 76264329 | 76265072 |
| 12 | 76221153 | 76229793 NM_023275    | chr12 | 76223650 | 76224243 |

|    |          |          |              |       |          |          |
|----|----------|----------|--------------|-------|----------|----------|
| 15 | 76199694 | 76208195 | NM_183099    | chr15 | 76201726 | 76202338 |
| 3  | 76154514 | 76163024 | NM_178673    | chr3  | 76161239 | 76161833 |
| 14 | 76108801 | 76117300 | BC052062     | chr14 | 76108831 | 76109470 |
| 12 | 76093018 | 76102172 | NM_172805    | chr12 | 76101000 | 76101891 |
| 10 | 75906643 | 75915186 | NM_019434    | chr10 | 75907302 | 75907949 |
| 15 | 75790474 | 75798973 | BC026404     | chr15 | 75794301 | 75795032 |
| 16 | 75789405 | 75797946 | NM_023380    | chr16 | 75791804 | 75792476 |
| 2  | 75735994 | 75745246 | BC026507     | chr2  | 75742842 | 75743502 |
| 10 | 75691569 | 75700068 | NM_009115    | chr10 | 75691799 | 75692882 |
| 4  | 75602208 | 75611113 | NM_001014288 | chr4  | 75604111 | 75604916 |
| 15 | 75572678 | 75581177 | NM_194350    | chr15 | 75574835 | 75575509 |
| 17 | 75390867 | 75399423 | BC066069     | chr17 | 75392614 | 75393254 |
| 14 | 75368520 | 75377019 | AB241122     | chr14 | 75376475 | 75377003 |
| 8  | 75366915 | 75375414 | NM_028170    | chr8  | 75375273 | 75375891 |
| 8  | 75370268 | 75378767 | NM_028500    | chr8  | 75375273 | 75375891 |
| 1  | 75237492 | 75245991 | NM_010043    | chr1  | 75245376 | 75245947 |
| 1  | 75158992 | 75167528 | NM_009049    | chr1  | 75165461 | 75166816 |
| 1  | 75090093 | 75108401 | NM_009447    | chr1  | 75098629 | 75099596 |
| 15 | 75089676 | 75098175 | NM_008530    | chr15 | 75095812 | 75096733 |
| 9  | 75091286 | 75102650 | NM_138719    | chr9  | 75095175 | 75095826 |
| 9  | 75067740 | 75076239 | BC003985     | chr9  | 75073808 | 75074147 |
| 10 | 75027097 | 75035872 | NM_011820    | chr10 | 75027868 | 75028745 |
| 2  | 74990189 | 74998689 | BC092050     | chr2  | 74998178 | 74998649 |
| 5  | 74956990 | 74965521 | NM_010727    | chr5  | 74958452 | 74959405 |
| 17 | 74904589 | 74913127 | NM_019919    | chr17 | 74912092 | 74912980 |
| 18 | 74898577 | 74907091 | NM_177470    | chr18 | 74900566 | 74901529 |
| 15 | 74873586 | 74882085 | NM_010741    | chr15 | 74876156 | 74877127 |
| 18 | 74835322 | 74843821 | M55253       | chr18 | 74843224 | 74843784 |
| 1  | 74816127 | 74839928 | NM_153111    | chr1  | 74839770 | 74840758 |
| 1  | 74816127 | 74839928 | NM_153111    | chr1  | 74827893 | 74829245 |
| 15 | 74808108 | 74816685 | NM_020498    | chr15 | 74810801 | 74811417 |
| 1  | 74718723 | 74727725 | NM_009518    | chr1  | 74726068 | 74726864 |
| 15 | 74624289 | 74633223 | NM_029627    | chr15 | 74632609 | 74633080 |
| 15 | 74624289 | 74633223 | NM_029627    | chr15 | 74625363 | 74625999 |
| 15 | 74603580 | 74612114 | NM_172433    | chr15 | 74608672 | 74609335 |
| 2  | 74557819 | 74566419 | NM_010467    | chr2  | 74565379 | 74566083 |
| 2  | 74516817 | 74530412 | NM_010469    | chr2  | 74527879 | 74528813 |
| 10 | 74472084 | 74483329 | NM_029781    | chr10 | 74475076 | 74475842 |
| 15 | 74459605 | 74469516 | BC111897     | chr15 | 74467684 | 74468634 |
| 10 | 74428731 | 74437230 | BC014702     | chr10 | 74429515 | 74430323 |
| 13 | 74423864 | 74432363 | NM_027704    | chr13 | 74428153 | 74429028 |
| 1  | 74289315 | 74297814 | NM_001033345 | chr1  | 74297673 | 74298120 |
| 11 | 74174866 | 74183365 | NM_001011851 | chr11 | 74180746 | 74181444 |
| 8  | 73828971 | 73837475 | NM_173013    | chr8  | 73834977 | 73836176 |
| 5  | 73830404 | 73838903 | BC031793     | chr5  | 73832511 | 73833165 |
| 5  | 73830404 | 73838903 | BC031793     | chr5  | 73830424 | 73831020 |
| 9  | 73726129 | 73736699 | BC030416     | chr9  | 73728979 | 73729770 |

|   |    |          |                       |       |          |          |
|---|----|----------|-----------------------|-------|----------|----------|
|   | 8  | 73701843 | 73718475 NM_008841    | chr8  | 73713614 | 73714812 |
|   | 15 | 73430836 | 73439335 BC056501     | chr15 | 73435739 | 73436515 |
|   | 14 | 73368995 | 73378465 NM_172812    | chr14 | 73373612 | 73374227 |
|   | 11 | 73184946 | 73193445 NM_146922    | chr11 | 73192306 | 73192956 |
|   | 12 | 73152078 | 73161562 NM_001007596 | chr12 | 73159401 | 73160173 |
|   | 11 | 73077815 | 73086328 NM_145099    | chr11 | 73083724 | 73084426 |
|   | 2  | 73012680 | 73021286 NM_025942    | chr2  | 73016300 | 73016900 |
|   | 8  | 72995921 | 73004436 NM_181540    | chr8  | 72998333 | 72999179 |
|   | 12 | 72987076 | 72995575 NM_181752    | chr12 | 72988386 | 72989067 |
|   | 1  | 72946600 | 72955106 NM_009407    | chr1  | 72950178 | 72951034 |
|   | 11 | 72900778 | 72909289 NM_008399    | chr11 | 72908372 | 72908958 |
|   | 5  | 72895771 | 72904270 M84742       | chr5  | 72895747 | 72896671 |
|   | 5  | 72780844 | 72789608 NM_016869    | chr5  | 72785599 | 72786249 |
|   | 9  | 72716780 | 72725444 NM_028116    | chr9  | 72722840 | 72723631 |
|   | 8  | 72642973 | 72651891 NM_001039967 | chr8  | 72647223 | 72647821 |
|   | 15 | 72371036 | 72379535 NM_001033876 | chr15 | 72371225 | 72371924 |
|   | 14 | 72279898 | 72288397 NM_172527    | chr14 | 72280919 | 72281488 |
|   | 14 | 72280941 | 72289449 NM_011506    | chr14 | 72280919 | 72281488 |
|   | 11 | 72017749 | 72033866 NM_026559    | chr11 | 72025176 | 72025891 |
|   | 11 | 71851205 | 71859704 NM_053245    | chr11 | 71852675 | 71853357 |
|   | 11 | 71852697 | 71861709 NM_144526    | chr11 | 71852675 | 71853357 |
|   | 8  | 71803543 | 71812054 NM_008509    | chr8  | 71808339 | 71809051 |
|   | 17 | 71680804 | 71689303 NM_030179    | chr17 | 71681537 | 71682501 |
|   | 5  | 71372236 | 71380984 NM_008066    | chr5  | 71373211 | 71374260 |
|   | 6  | 71249243 | 71257742 U76371       | chr6  | 71255467 | 71256099 |
|   | 6  | 71207540 | 71216039 BC005704     | chr6  | 71207484 | 71208386 |
|   | 12 | 71143723 | 71152230 NM_133198    | chr12 | 71149093 | 71149687 |
|   | 6  | 71123467 | 71131977 NM_017399    | chr6  | 71131221 | 71131960 |
|   | 6  | 70646143 | 70658513 BC092064     | chr6  | 70647643 | 70648319 |
|   | 2  | 70482652 | 70491151 BC007468     | chr2  | 70489872 | 70490473 |
|   | 8  | 70413747 | 70432512 NM_010874    | chr8  | 70425884 | 70426547 |
| X |    | 70374184 | 70382713 NM_008106    | chrX  | 70379203 | 70379873 |
|   | 18 | 70176165 | 70184957 NM_030554    | chr18 | 70176764 | 70177786 |
| X |    | 70161492 | 70169991 NM_138630    | chrX  | 70166990 | 70167582 |
| X |    | 70138822 | 70147333 NM_019404    | chrX  | 70143889 | 70144488 |
| X |    | 70074536 | 70083689 NM_001029868 | chrX  | 70076131 | 70076728 |
|   | 11 | 70034467 | 70062041 NM_007528    | chr11 | 70048565 | 70049442 |
|   | 4  | 70018699 | 70027289 NM_172694    | chr4  | 70020567 | 70021155 |
|   | 10 | 69992069 | 70000577 NM_178621    | chr10 | 69992781 | 69993561 |
|   | 11 | 69940552 | 69952810 NM_145137    | chr11 | 69951760 | 69952521 |
|   | 9  | 69805714 | 69814273 NM_001039519 | chr9  | 69806676 | 69807294 |
|   | 11 | 69632136 | 69657044 NM_198862    | chr11 | 69641791 | 69642401 |
| X |    | 69513675 | 69524110 NM_011727    | chrX  | 69516780 | 69517676 |
| X |    | 69513675 | 69524110 NM_011727    | chrX  | 69516119 | 69516728 |
|   | 2  | 69510946 | 69519445 NM_177244    | chr2  | 69511058 | 69511591 |
|   | 11 | 69476338 | 69494510 NM_144958    | chr11 | 69492496 | 69493112 |
|   | 18 | 69463890 | 69475153 NM_013685    | chr18 | 69465535 | 69466203 |

|   |    |          |                       |       |          |          |
|---|----|----------|-----------------------|-------|----------|----------|
|   | 2  | 69442093 | 69450593 NM_028284    | chr2  | 69449870 | 69450524 |
| X |    | 69438936 | 69447441 BC064787     | chrX  | 69446160 | 69447228 |
|   | 11 | 69373551 | 69382373 NM_007911    | chr11 | 69379183 | 69379899 |
| X |    | 69345296 | 69355761 NM_011726    | chrX  | 69347932 | 69349124 |
| X |    | 69243754 | 69253000 NM_009549    | chrX  | 69250325 | 69251076 |
|   | 13 | 69043617 | 69052146 NM_027123    | chr13 | 69049519 | 69050184 |
|   | 13 | 69045588 | 69055492 NM_172480    | chr13 | 69049519 | 69050184 |
|   | 13 | 69043617 | 69052146 NM_027123    | chr13 | 69046691 | 69047285 |
|   | 13 | 69045588 | 69055492 NM_172480    | chr13 | 69046691 | 69047285 |
|   | 2  | 69004471 | 69012996 NM_025565    | chr2  | 69009899 | 69010942 |
|   | 11 | 68881004 | 68892121 NM_028336    | chr11 | 68882689 | 68883490 |
|   | 11 | 68801988 | 68810487 BC115876     | chr11 | 68806435 | 68807328 |
|   | 11 | 68698748 | 68707247 NM_177060    | chr11 | 68705229 | 68705962 |
| X |    | 68468737 | 68477236 NM_020280    | chrX  | 68472267 | 68472874 |
|   | 14 | 68453817 | 68462316 BC006648     | chr14 | 68457812 | 68458676 |
|   | 14 | 68119132 | 68127631 NM_010920    | chr14 | 68123775 | 68124709 |
| X |    | 68063522 | 68072051 BC094639     | chrX  | 68064455 | 68065099 |
|   | 14 | 67976534 | 67985108 NM_009285    | chr14 | 67983805 | 67984422 |
|   | 18 | 67672043 | 67684146 NM_194355    | chr18 | 67679671 | 67680239 |
|   | 16 | 67536647 | 67545146 NM_178721    | chr16 | 67540974 | 67541615 |
|   | 18 | 67368326 | 67377199 NM_172630    | chr18 | 67370079 | 67370973 |
|   | 11 | 67068845 | 67077344 BC052786     | chr11 | 67073577 | 67074771 |
|   | 9  | 66592068 | 66600599 NM_177583    | chr9  | 66599974 | 66600555 |
|   | 5  | 66579030 | 66587529 AY650904     | chr5  | 66584105 | 66584750 |
|   | 9  | 66506886 | 66515385 NM_178396    | chr9  | 66508717 | 66509421 |
|   | 17 | 66288356 | 66296855 NM_172963    | chr17 | 66290311 | 66290904 |
|   | 7  | 66264741 | 66273291 NM_146191    | chr7  | 66270516 | 66271484 |
|   | 5  | 66136036 | 66144535 BC094937     | chr5  | 66138052 | 66138805 |
|   | 17 | 65974068 | 65982589 NM_001025572 | chr17 | 65976566 | 65977210 |
|   | 2  | 65922983 | 65931632 NM_015736    | chr2  | 65929294 | 65930262 |
|   | 14 | 65859318 | 65872014 NM_175498    | chr14 | 65866247 | 65866888 |
|   | 18 | 65744672 | 65753171 BC046409     | chr18 | 65749409 | 65750138 |
|   | 6  | 65595189 | 65603714 NM_172399    | chr6  | 65599043 | 65599638 |
|   | 17 | 65536800 | 65547711 NM_153519    | chr17 | 65537394 | 65538501 |
|   | 6  | 65513976 | 65522672 NM_001001495 | chr6  | 65518608 | 65519743 |
|   | 14 | 65302462 | 65310961 AF105222     | chr14 | 65302475 | 65303094 |
|   | 14 | 65292483 | 65300984 NM_019675    | chr14 | 65298923 | 65299508 |
|   | 3  | 65190943 | 65200071 NM_010597    | chr3  | 65192048 | 65192752 |
|   | 3  | 65190943 | 65200071 NM_010597    | chr3  | 65191223 | 65191921 |
|   | 9  | 65146638 | 65155137 BC022772     | chr9  | 65146632 | 65147270 |
|   | 1  | 65035127 | 65043639 NM_007774    | chr1  | 65042816 | 65043301 |
| X |    | 65016504 | 65025003 NM_174993    | chrX  | 65023928 | 65025078 |
|   | 11 | 64976657 | 64985156 NM_175003    | chr11 | 64979859 | 64980530 |
|   | 1  | 64964524 | 64973024 NM_027582    | chr1  | 64967217 | 64967830 |
|   | 1  | 64926396 | 64934895 NM_011287    | chr1  | 64929731 | 64930386 |
|   | 8  | 64886712 | 64895211 BC013672     | chr8  | 64890291 | 64891037 |
|   | 18 | 64783597 | 64792369 NM_001001488 | chr18 | 64784475 | 64785282 |

|    |          |                       |       |          |          |
|----|----------|-----------------------|-------|----------|----------|
| 14 | 64753949 | 64762520 NM_023209    | chr14 | 64754529 | 64755209 |
| 7  | 64567983 | 64576482 BC060269     | chr7  | 64572768 | 64573355 |
| 15 | 64210093 | 64218592 NM_010026    | chr15 | 64213283 | 64214229 |
| 14 | 63928231 | 63936730 BC055700     | chr14 | 63931709 | 63932377 |
| 9  | 63909153 | 63922111 NM_145835    | chr9  | 63912336 | 63913218 |
| 15 | 63825136 | 63833635 BC011343     | chr15 | 63831636 | 63832319 |
| 13 | 63818462 | 63827055 NM_023507    | chr13 | 63824496 | 63825130 |
| 11 | 63735847 | 63744479 NM_018805    | chr11 | 63741836 | 63742691 |
| 18 | 63153288 | 63161787 NM_001039485 | chr18 | 63155697 | 63156446 |
| 4  | 63096402 | 63104901 NM_029324    | chr4  | 63103489 | 63104090 |
| 4  | 63096402 | 63104901 NM_029324    | chr4  | 63098115 | 63098444 |
| 18 | 63072459 | 63080958 AB023957     | chr18 | 63073510 | 63074102 |
| 14 | 62978720 | 62987219 BC031365     | chr14 | 62980268 | 62980997 |
| 14 | 62970000 | 62978520 AY168340     | chr14 | 62973161 | 62973655 |
| 16 | 62726473 | 62735014 NM_178925    | chr16 | 62733348 | 62734047 |
| 4  | 62638004 | 62646516 NM_007443    | chr4  | 62645886 | 62646230 |
| 14 | 62384565 | 62393064 NM_177628    | chr14 | 62387131 | 62388149 |
| 18 | 62034668 | 62043192 NM_198649    | chr18 | 62038283 | 62038890 |
| 2  | 61841402 | 61849932 NM_033552    | chr2  | 61843628 | 61844430 |
| 10 | 61624025 | 61632583 NM_197996    | chr10 | 61629168 | 61630014 |
| 10 | 61522447 | 61531031 NM_009719    | chr10 | 61530410 | 61530908 |
| 10 | 61460379 | 61468911 BC087556     | chr10 | 61464438 | 61465173 |
| 14 | 61407900 | 61416399 NM_172810    | chr14 | 61413574 | 61414024 |
| 18 | 61299867 | 61308419 NM_134134    | chr18 | 61302184 | 61302865 |
| 10 | 61176722 | 61185303 NM_207000    | chr10 | 61181530 | 61182259 |
| 3  | 60958928 | 60967442 BC003449     | chr3  | 60960591 | 60961269 |
| 1  | 60916460 | 60924975 NM_017480    | chr1  | 60918540 | 60919136 |
| 13 | 60809968 | 60818467 NM_027344    | chr13 | 60809158 | 60810059 |
| 13 | 60793473 | 60801972 NM_199148    | chr13 | 60793562 | 60794261 |
| 11 | 60745553 | 60754062 BC031537     | chr11 | 60751230 | 60752037 |
| 11 | 60727432 | 60735986 NM_025294    | chr11 | 60732012 | 60732844 |
| 18 | 60714586 | 60723157 NM_133363    | chr18 | 60717939 | 60718582 |
| 11 | 60624787 | 60641473 NM_009171    | chr11 | 60634385 | 60635541 |
| 13 | 60605570 | 60614333 NM_029653    | chr13 | 60607010 | 60607600 |
| X  | 60535027 | 60543661 NM_178740    | chrX  | 60535302 | 60535915 |
| 2  | 60351601 | 60360117 NM_008867    | chr2  | 60356369 | 60357010 |
| 3  | 60163790 | 60172333 NM_032400    | chr3  | 60169260 | 60170027 |
| 2  | 60082758 | 60091257 NM_025422    | chr2  | 60088958 | 60089799 |
| 9  | 59745448 | 59754085 NM_013708    | chr9  | 59751870 | 59752504 |
| 13 | 59701225 | 59709724 NM_183290    | chr13 | 59702925 | 59703774 |
| 10 | 59581565 | 59595596 NM_016803    | chr10 | 59589362 | 59590275 |
| 10 | 59392196 | 59400695 NM_026937    | chr10 | 59395516 | 59396009 |
| 6  | 59353369 | 59361872 NM_183183    | chr6  | 59354495 | 59355362 |
| 19 | 59220779 | 59229279 NM_009501    | chr19 | 59224861 | 59225570 |
| 3  | 59216001 | 59225257 NM_133200    | chr3  | 59222847 | 59223543 |
| 3  | 59216001 | 59225257 NM_133200    | chr3  | 59216242 | 59217121 |
| 12 | 59123816 | 59132315 NM_009216    | chr12 | 59127741 | 59128286 |

|    |          |          |              |       |          |          |
|----|----------|----------|--------------|-------|----------|----------|
| 7  | 59090619 | 59099580 | NM_011668    | chr7  | 59097464 | 59098163 |
| 1  | 59036913 | 59045446 | NM_175200    | chr1  | 59040481 | 59041089 |
| 16 | 59026238 | 59034737 | NM_001011807 | chr16 | 59026250 | 59026923 |
| 4  | 58913026 | 58921525 | BC025035     | chr4  | 58919227 | 58919972 |
| 11 | 58843205 | 58865307 | BC044882     | chr11 | 58859997 | 58860787 |
| 13 | 58810219 | 58820428 | NM_008745    | chr13 | 58815837 | 58816434 |
| 11 | 58768207 | 58776707 | NM_206882    | chr11 | 58774789 | 58775654 |
| 11 | 58773976 | 58782475 | NM_031172    | chr11 | 58774789 | 58775654 |
| 16 | 58664561 | 58674479 | NM_171826    | chr16 | 58671705 | 58672349 |
| 17 | 58656510 | 58665009 | BC029007     | chr17 | 58657792 | 58658438 |
| 4  | 58590923 | 58599422 | U48235       | chr4  | 58597583 | 58598281 |
| 11 | 58588284 | 58604930 | NM_001011760 | chr11 | 58594113 | 58595026 |
| 4  | 58590923 | 58599422 | U48235       | chr4  | 58592433 | 58593397 |
| 14 | 58573418 | 58582454 | NM_145463    | chr14 | 58576457 | 58576994 |
| 2  | 58564328 | 58573070 | NM_029692    | chr2  | 58568061 | 58568943 |
| 2  | 58380044 | 58388543 | L15436       | chr2  | 58386049 | 58386497 |
| 11 | 58343766 | 58352265 | NM_146879    | chr11 | 58346429 | 58347297 |
| 11 | 58304449 | 58312948 | NM_001011770 | chr11 | 58306929 | 58307591 |
| 11 | 58189241 | 58197751 | NM_027339    | chr11 | 58193313 | 58194014 |
| 1  | 58148943 | 58157515 | NM_023631    | chr1  | 58153346 | 58154240 |
| X  | 58040039 | 58048538 | BC010759     | chrX  | 58042538 | 58043139 |
| 1  | 57968515 | 57977049 | NM_009676    | chr1  | 57975974 | 57976590 |
| 9  | 57921225 | 57929985 | NM_009291    | chr9  | 57928881 | 57929538 |
| 11 | 57861061 | 57879171 | BC053449     | chr11 | 57874411 | 57875008 |
| 15 | 57809993 | 57818492 | NM_173862    | chr15 | 57817925 | 57818447 |
| 1  | 57784117 | 57792616 | BC014764     | chr1  | 57787461 | 57788060 |
| 19 | 57700223 | 57708722 | BC050020     | chr19 | 57703164 | 57703899 |
| 10 | 57616384 | 57638017 | NM_001034869 | chr10 | 57631995 | 57632901 |
| 10 | 57616384 | 57638017 | NM_001034869 | chr10 | 57629470 | 57630536 |
| 10 | 57616384 | 57638017 | NM_001034869 | chr10 | 57621692 | 57622768 |
| 10 | 57616384 | 57638017 | NM_001034869 | chr10 | 57619779 | 57621133 |
| 10 | 57616384 | 57638017 | NM_001034869 | chr10 | 57616907 | 57617882 |
| 3  | 57507388 | 57515887 | NM_145539    | chr3  | 57513490 | 57514233 |
| 7  | 57452398 | 57461555 | NM_008071    | chr7  | 57459173 | 57459907 |
| 7  | 57452398 | 57461555 | NM_008071    | chr7  | 57458089 | 57458613 |
| 3  | 57380303 | 57395848 | NM_008536    | chr3  | 57387704 | 57388388 |
| 18 | 57252844 | 57261343 | NM_001001979 | chr18 | 57254082 | 57254784 |
| 16 | 57150326 | 57158825 | NM_026254    | chr16 | 57152542 | 57153148 |
| 6  | 57133436 | 57141935 | NM_053235    | chr6  | 57137718 | 57138167 |
| 14 | 57020796 | 57029583 | NM_013518    | chr14 | 57029182 | 57029535 |
| 17 | 56958450 | 56966961 | NM_011691    | chr17 | 56966052 | 56966663 |
| 11 | 56849379 | 56857878 | NM_008165    | chr11 | 56856990 | 56857860 |
| 4  | 56828061 | 56840008 | NM_009611    | chr4  | 56835179 | 56835812 |
| 4  | 56832932 | 56841450 | NM_025271    | chr4  | 56835179 | 56835812 |
| 17 | 56761264 | 56769763 | NM_153551    | chr17 | 56763026 | 56763661 |
| 9  | 56722683 | 56732508 | NM_175483    | chr9  | 56723615 | 56724515 |
| 18 | 56692371 | 56700893 | NM_019996    | chr18 | 56697252 | 56697944 |



|    |          |          |              |       |          |          |
|----|----------|----------|--------------|-------|----------|----------|
| 18 | 56695740 | 56704241 | NM_138600    | chr18 | 56697252 | 56697944 |
| 14 | 56685911 | 56694459 | AB023958     | chr14 | 56692986 | 56693394 |
| 1  | 56579489 | 56587996 | NM_027661    | chr1  | 56585239 | 56585857 |
| 17 | 56554627 | 56563256 | BC116283     | chr17 | 56561154 | 56561770 |
| 17 | 56557072 | 56565571 | NM_001039114 | chr17 | 56561154 | 56561770 |
| 9  | 56480836 | 56489390 | NM_181074    | chr9  | 56482079 | 56482782 |
| 17 | 56395251 | 56408101 | NM_178926    | chr17 | 56405557 | 56406279 |
| 12 | 56311018 | 56319527 | NM_011968    | chr12 | 56313784 | 56314413 |
| 13 | 56259286 | 56267785 | NM_010896    | chr13 | 56262609 | 56263496 |
| 17 | 55665700 | 55674321 | NM_024432    | chr17 | 55665824 | 55666538 |
| 17 | 55627709 | 55636231 | NM_013733    | chr17 | 55634836 | 55635314 |
| 7  | 55630203 | 55638779 | NM_178706    | chr7  | 55631020 | 55631806 |
| 17 | 55596362 | 55604878 | NM_145934    | chr17 | 55602145 | 55603123 |
| 17 | 55596524 | 55605118 | NM_026530    | chr17 | 55602145 | 55603123 |
| 13 | 55535657 | 55552143 | NM_134059    | chr13 | 55539928 | 55540566 |
| 14 | 55213829 | 55222331 | NM_013542    | chr14 | 55214258 | 55214899 |
| 6  | 55102095 | 55110616 | NM_009349    | chr6  | 55109588 | 55110348 |
| 14 | 55072197 | 55080696 | NM_010373    | chr14 | 55074219 | 55075264 |
| 9  | 55001132 | 55009631 | NM_028049    | chr9  | 55007764 | 55008361 |
| 8  | 55004424 | 55012923 | NM_001005847 | chr8  | 55006221 | 55006945 |
| 14 | 54990194 | 54998711 | NM_008571    | chr14 | 54992389 | 54993157 |
| 14 | 54896132 | 54904809 | NM_010780    | chr14 | 54898706 | 54899301 |
| 14 | 54899051 | 54907550 | M68899       | chr14 | 54898706 | 54899301 |
| 9  | 54844167 | 54852727 | NM_148944    | chr9  | 54845147 | 54845741 |
| 9  | 54822068 | 54830696 | NM_145129    | chr9  | 54827619 | 54828316 |
| 13 | 54787625 | 54801582 | NM_001033269 | chr13 | 54792914 | 54793592 |
| 9  | 54500539 | 54509038 | BC022948     | chr9  | 54507054 | 54507650 |
| 9  | 54500539 | 54509038 | BC022948     | chr9  | 54504625 | 54505219 |
| 14 | 54475763 | 54493519 | NM_008736    | chr14 | 54491731 | 54492357 |
| 14 | 54488337 | 54496973 | NM_028994    | chr14 | 54491731 | 54492357 |
| 9  | 54457319 | 54466022 | NM_053178    | chr9  | 54463326 | 54464274 |
| 14 | 54458694 | 54467930 | NM_009947    | chr14 | 54459004 | 54459674 |
| 2  | 54245773 | 54254272 | NM_173030    | chr2  | 54251032 | 54251937 |
| 14 | 53877222 | 53886123 | NM_010112    | chr14 | 53885728 | 53886449 |
| 6  | 53528040 | 53536539 | BC029022     | chr6  | 53535472 | 53536130 |
| 6  | 53528040 | 53536539 | BC029022     | chr6  | 53528315 | 53529447 |
| 11 | 53459568 | 53468088 | NM_021283    | chr11 | 53464405 | 53465450 |
| 4  | 53455757 | 53464256 | NM_133891    | chr4  | 53463880 | 53464221 |
| 11 | 53459568 | 53468088 | NM_021283    | chr11 | 53459716 | 53460343 |
| 5  | 53331605 | 53340104 | AF081499     | chr5  | 53337036 | 53337655 |
| 11 | 53264053 | 53280238 | NM_025352    | chr11 | 53278231 | 53278846 |
| 11 | 53270791 | 53279300 | NM_008110    | chr11 | 53278231 | 53278846 |
| 12 | 53013376 | 53021884 | NM_029760    | chr12 | 53018703 | 53019450 |
| 13 | 52974665 | 52987346 | BC100384     | chr13 | 52985627 | 52986405 |
| 4  | 52930393 | 52938892 | NM_146839    | chr4  | 52935708 | 52936322 |
| 1  | 52651206 | 52659705 | NM_133829    | chr1  | 52653503 | 52654254 |
| 13 | 52603314 | 52611813 | NM_011518    | chr13 | 52608265 | 52609225 |

|    |          |          |              |       |          |          |
|----|----------|----------|--------------|-------|----------|----------|
| 11 | 52602129 | 52610628 | NM_177059    | chr11 | 52606210 | 52607103 |
| 12 | 52508977 | 52517574 | NM_007728    | chr12 | 52512855 | 52513446 |
| 2  | 52496092 | 52504591 | NM_001037099 | chr2  | 52498602 | 52499526 |
| 9  | 52436698 | 52447832 | NM_177907    | chr9  | 52441415 | 52442052 |
| 9  | 52436698 | 52447832 | NM_177907    | chr9  | 52437806 | 52438551 |
| 10 | 52373020 | 52381519 | NM_178675    | chr10 | 52378400 | 52379002 |
| 7  | 51740986 | 51749668 | NM_008087    | chr7  | 51747128 | 51748238 |
| 13 | 51735372 | 51743871 | U69535       | chr13 | 51735814 | 51736432 |
| 11 | 51597758 | 51613057 | NM_175255    | chr11 | 51611329 | 51612324 |
| 3  | 51540637 | 51549136 | BC030167     | chr3  | 51547120 | 51547923 |
| 3  | 51362824 | 51371323 | AF256219     | chr3  | 51365417 | 51366011 |
| 10 | 51317374 | 51325873 | NM_153071    | chr10 | 51322836 | 51323273 |
| 14 | 51288916 | 51301002 | NM_146432    | chr14 | 51293717 | 51294350 |
| 14 | 51247899 | 51256713 | NM_015772    | chr14 | 51253244 | 51253820 |
| 11 | 50896680 | 50905992 | NM_009329    | chr11 | 50901470 | 50902220 |
| 11 | 50822126 | 50830625 | NM_146911    | chr11 | 50823715 | 50824247 |
| 11 | 50794556 | 50803055 | NM_008936    | chr11 | 50795110 | 50795890 |
| 11 | 50771877 | 50780408 | NM_013744    | chr11 | 50779583 | 50780209 |
| 18 | 50691362 | 50699873 | NM_026108    | chr18 | 50692863 | 50694490 |
| 9  | 50514468 | 50530059 | NM_133981    | chr9  | 50523013 | 50523598 |
| 9  | 50517857 | 50526382 | NM_023483    | chr9  | 50523013 | 50523598 |
| 16 | 50508003 | 50516502 | NM_027046    | chr16 | 50513073 | 50513776 |
| 9  | 50489178 | 50510523 | NM_025865    | chr9  | 50503536 | 50504615 |
| 9  | 50497555 | 50507749 | NM_009964    | chr9  | 50503536 | 50504615 |
| 13 | 50424374 | 50432873 | BC040428     | chr13 | 50431857 | 50432481 |
| 13 | 50424374 | 50432873 | BC040428     | chr13 | 50424882 | 50425650 |
| 11 | 50272035 | 50280534 | NM_172557    | chr11 | 50274076 | 50274725 |
| 16 | 50247842 | 50256341 | AF454944     | chr16 | 50249798 | 50250484 |
| 14 | 50078211 | 50086710 | NM_019398    | chr14 | 50082274 | 50083140 |
| 6  | 50033835 | 50042462 | NM_019939    | chr6  | 50039746 | 50040359 |
| 14 | 50032504 | 50041003 | NM_203508    | chr14 | 50036653 | 50037261 |
| 11 | 49684177 | 49700135 | NM_016961    | chr11 | 49689234 | 49689882 |
| 13 | 49662169 | 49670722 | NM_025495    | chr13 | 49669179 | 49669801 |
| 4  | 49616316 | 49624903 | NM_025944    | chr4  | 49623627 | 49624313 |
| 4  | 49616316 | 49624903 | NM_025944    | chr4  | 49618364 | 49619163 |
| 4  | 49563519 | 49576589 | NM_144903    | chr4  | 49570950 | 49571598 |
| 14 | 49558234 | 49566733 | NM_146299    | chr14 | 49562381 | 49563064 |
| 11 | 49401346 | 49409845 | NM_207573    | chr11 | 49407660 | 49408286 |
| 14 | 49240285 | 49248784 | NM_146664    | chr14 | 49246558 | 49247343 |
| 11 | 49130720 | 49139223 | NM_146470    | chr11 | 49137702 | 49138318 |
| 11 | 49130720 | 49139223 | NM_146470    | chr11 | 49131821 | 49132667 |
| 4  | 49074562 | 49083085 | NM_178756    | chr4  | 49080358 | 49081179 |
| 9  | 48996463 | 49004962 | NM_177701    | chr9  | 49002929 | 49003483 |
| 11 | 48997439 | 49005938 | NM_146276    | chr11 | 48997459 | 48998724 |
| 16 | 48911062 | 48919716 | BC117954     | chr16 | 48918247 | 48918862 |
| 9  | 48848660 | 48863432 | NM_030709    | chr9  | 48860997 | 48861531 |
| 9  | 48848660 | 48863432 | NM_030709    | chr9  | 48858771 | 48859460 |

|   |    |          |                    |       |          |          |
|---|----|----------|--------------------|-------|----------|----------|
|   | 6  | 48765095 | 48778962 NM_025326 | chr6  | 48769245 | 48769839 |
|   | 6  | 48767635 | 48776614 NM_023056 | chr6  | 48769245 | 48769839 |
|   | 6  | 48765095 | 48778962 NM_025326 | chr6  | 48767577 | 48768221 |
|   | 6  | 48767635 | 48776614 NM_023056 | chr6  | 48767577 | 48768221 |
|   | 3  | 48702781 | 48711296 NM_025493 | chr3  | 48707032 | 48707445 |
|   | 4  | 48487525 | 48497163 BC006867  | chr4  | 48489097 | 48490234 |
|   | 14 | 48088801 | 48102349 BC054060  | chr14 | 48101025 | 48101530 |
|   | 9  | 47532976 | 47541475 AF061260  | chr9  | 47533975 | 47534772 |
|   | 6  | 47168033 | 47176540 NM_025771 | chr6  | 47173901 | 47174536 |
|   | 13 | 47023292 | 47031792 NM_175340 | chr13 | 47025808 | 47026401 |
|   | 8  | 46878489 | 46887001 NM_153535 | chr8  | 46881762 | 46882367 |
|   | 11 | 46648222 | 46656741 NM_178759 | chr11 | 46653596 | 46654543 |
|   | 14 | 46579654 | 46588155 NM_008477 | chr14 | 46586232 | 46586827 |
|   | 4  | 46585041 | 46593540 NM_178893 | chr4  | 46585630 | 46586372 |
|   | 19 | 46389436 | 46397935 NM_024192 | chr19 | 46392540 | 46393566 |
|   | 7  | 46238516 | 46247081 NM_010866 | chr7  | 46240251 | 46241275 |
|   | 19 | 46103892 | 46120427 BC066048  | chr19 | 46114644 | 46115511 |
|   | 7  | 46103029 | 46111528 U96411    | chr7  | 46103233 | 46104011 |
| X |    | 46030334 | 46048372 NM_177591 | chrX  | 46046140 | 46046732 |
| X |    | 46030334 | 46048372 NM_177591 | chrX  | 46037884 | 46038541 |
|   | 12 | 45942140 | 45950769 NM_144552 | chr12 | 45945121 | 45945958 |
|   | 12 | 45942140 | 45950769 NM_144552 | chr12 | 45942845 | 45943476 |
|   | 17 | 45898319 | 45916403 NM_144856 | chr17 | 45901373 | 45901872 |
|   | 16 | 45761216 | 45769715 NM_153412 | chr16 | 45762238 | 45762844 |
|   | 16 | 45602209 | 45618990 NM_172455 | chr16 | 45607031 | 45607713 |
| X |    | 45530344 | 45538869 NM_145951 | chrX  | 45533138 | 45533755 |
|   | 16 | 45325718 | 45334385 NM_010818 | chr16 | 45325165 | 45325847 |
|   | 12 | 45320946 | 45329445 BC055053  | chr12 | 45324178 | 45324789 |
|   | 10 | 45260304 | 45268846 NM_172473 | chr10 | 45262926 | 45263530 |
|   | 8  | 45195811 | 45204310 NM_145745 | chr8  | 45197882 | 45198738 |
|   | 9  | 45115180 | 45123933 NM_022004 | chr9  | 45117724 | 45118900 |
|   | 7  | 45043224 | 45051723 NM_053256 | chr7  | 45047171 | 45047954 |
| X |    | 44933631 | 44942205 NM_173376 | chrX  | 44936642 | 44937278 |
|   | 7  | 44924535 | 44933044 NM_025533 | chr7  | 44927140 | 44927734 |
|   | 7  | 44927195 | 44936464 NM_022999 | chr7  | 44927140 | 44927734 |
|   | 7  | 44757910 | 44779116 NM_029365 | chr7  | 44765835 | 44766434 |
|   | 7  | 44758135 | 44768808 BC045601  | chr7  | 44765835 | 44766434 |
|   | 9  | 44758086 | 44766585 NM_007648 | chr9  | 44759448 | 44760062 |
|   | 10 | 44749629 | 44758135 NM_011156 | chr10 | 44752849 | 44753189 |
|   | 7  | 44711269 | 44727885 NM_026270 | chr7  | 44723357 | 44723957 |
|   | 2  | 44575876 | 44584375 BC052069  | chr2  | 44582822 | 44583663 |
|   | 19 | 44540783 | 44549350 NM_011720 | chr19 | 44547194 | 44547989 |
|   | 9  | 44518004 | 44529871 NM_023831 | chr9  | 44525955 | 44526297 |
|   | 7  | 44452928 | 44461661 NM_008422 | chr7  | 44459544 | 44460151 |
|   | 7  | 44358713 | 44367212 BC049752  | chr7  | 44360299 | 44361072 |
|   | 4  | 44316017 | 44324585 NM_010790 | chr4  | 44316464 | 44317405 |
|   | 11 | 44237486 | 44246008 NM_008352 | chr11 | 44243516 | 44244125 |

|    |          |                       |       |          |          |
|----|----------|-----------------------|-------|----------|----------|
| 9  | 44222919 | 44236607 BC082304     | chr9  | 44233474 | 44234154 |
| 17 | 44197204 | 44205703 D14636       | chr17 | 44204648 | 44205297 |
| 5  | 44195416 | 44207500 NM_028677    | chr5  | 44197843 | 44198195 |
| 16 | 44186365 | 44194864 BC025888     | chr16 | 44191890 | 44192741 |
| 9  | 44143171 | 44151849 NM_008063    | chr9  | 44148184 | 44148867 |
| 9  | 44123705 | 44132227 NM_010860    | chr9  | 44131445 | 44132105 |
| 9  | 44124538 | 44134005 NM_021395    | chr9  | 44131445 | 44132105 |
| 7  | 44069477 | 44077980 NM_010915    | chr7  | 44070746 | 44071633 |
| 15 | 44020307 | 44028823 NM_013696    | chr15 | 44026525 | 44027617 |
| 7  | 43964334 | 43972833 NM_010642    | chr7  | 43968321 | 43969010 |
| 18 | 43883658 | 43892165 NM_054038    | chr18 | 43884820 | 43885492 |
| 7  | 43874720 | 43883245 NM_010644    | chr7  | 43878336 | 43878942 |
| 9  | 43846837 | 43860808 NM_147126    | chr9  | 43847212 | 43848190 |
| 7  | 43838103 | 43846623 NM_010116    | chr7  | 43841851 | 43842617 |
| 16 | 43675553 | 43684052 NM_007877    | chr16 | 43680468 | 43681297 |
| 1  | 43669239 | 43677738 NM_024283    | chr1  | 43676392 | 43677055 |
| 7  | 43654003 | 43668118 NM_008940    | chr7  | 43666473 | 43667482 |
| 19 | 43659636 | 43668135 NM_008699    | chr19 | 43662970 | 43664009 |
| 19 | 43659636 | 43668135 NM_008699    | chr19 | 43661084 | 43661761 |
| 7  | 43525688 | 43534285 NM_031181    | chr7  | 43527146 | 43528332 |
| 5  | 43516207 | 43524726 NM_175937    | chr5  | 43518770 | 43519535 |
| 7  | 43496781 | 43505280 NM_028236    | chr7  | 43501525 | 43502716 |
| 7  | 43469267 | 43480340 NM_028913    | chr7  | 43475729 | 43476363 |
| 7  | 43469267 | 43480340 NM_028913    | chr7  | 43473375 | 43473993 |
| 1  | 43448165 | 43456752 BC034255     | chr1  | 43450992 | 43451617 |
| 7  | 43398644 | 43407556 NM_021293    | chr7  | 43401244 | 43401875 |
| 11 | 43311729 | 43326816 NM_026979    | chr11 | 43314192 | 43315284 |
| 7  | 43292008 | 43314544 NM_177693    | chr7  | 43310614 | 43311230 |
| 17 | 43258906 | 43269564 NM_207649    | chr17 | 43267572 | 43268111 |
| 17 | 43127571 | 43136237 NM_028711    | chr17 | 43134830 | 43136119 |
| 17 | 43124480 | 43133088 NM_018887    | chr17 | 43128126 | 43128756 |
| 17 | 43127571 | 43136237 NM_028711    | chr17 | 43128126 | 43128756 |
| 4  | 43028711 | 43037588 NM_053081    | chr4  | 43031491 | 43031924 |
| 4  | 42985046 | 42993559 NM_026088    | chr4  | 42992764 | 42993493 |
| 14 | 42830936 | 42839435 U72672       | chr14 | 42834783 | 42835402 |
| 9  | 42692867 | 42701366 NM_175481    | chr9  | 42697091 | 42697925 |
| 9  | 42692867 | 42701366 NM_175481    | chr9  | 42695010 | 42695629 |
| 19 | 42659360 | 42672059 NM_053083    | chr19 | 42660761 | 42661798 |
| 8  | 42551078 | 42559611 NM_001005864 | chr8  | 42553364 | 42553954 |
| 6  | 42524480 | 42532979 NM_203396    | chr6  | 42530923 | 42531671 |
| 18 | 42514616 | 42523115 NM_138945    | chr18 | 42522531 | 42523098 |
| 19 | 42482595 | 42491094 NM_145123    | chr19 | 42486631 | 42487648 |
| 2  | 42472477 | 42481607 NM_053011    | chr2  | 42478215 | 42478857 |
| 8  | 42391259 | 42399758 L29006       | chr8  | 42398456 | 42399231 |
| 8  | 42367765 | 42376264 M62838       | chr8  | 42369446 | 42370069 |
| 10 | 42361332 | 42369831 NM_172416    | chr10 | 42364442 | 42365193 |
| 19 | 42294885 | 42311593 NM_027694    | chr19 | 42297718 | 42298375 |

|    |          |          |              |       |          |          |
|----|----------|----------|--------------|-------|----------|----------|
| 8  | 42287672 | 42296171 | NM_001009548 | chr8  | 42292785 | 42293454 |
| 10 | 42184444 | 42193170 | NM_017472    | chr10 | 42189069 | 42189529 |
| 19 | 42129945 | 42145755 | NM_198108    | chr19 | 42138548 | 42139131 |
| 19 | 42137746 | 42146296 | NM_145501    | chr19 | 42138548 | 42139131 |
| 5  | 42049969 | 42058748 | NM_007524    | chr5  | 42056278 | 42057337 |
| 19 | 41980819 | 41989325 | NM_023740    | chr19 | 41981948 | 41982544 |
| 4  | 41979785 | 41988284 | BC051472     | chr4  | 41979895 | 41980736 |
| 4  | 41938014 | 41953390 | NM_010549    | chr4  | 41946076 | 41946691 |
| 4  | 41909303 | 41924863 | NM_001017362 | chr4  | 41912497 | 41913470 |
| 11 | 41841243 | 41850101 | NM_177408    | chr11 | 41846333 | 41846768 |
| 4  | 41703505 | 41712004 | NM_001048005 | chr4  | 41704553 | 41705408 |
| 19 | 41596950 | 41605449 | NM_172154    | chr19 | 41604497 | 41605143 |
| 13 | 41495756 | 41504270 | NM_017464    | chr13 | 41498932 | 41499937 |
| 13 | 41495756 | 41504270 | NM_017464    | chr13 | 41496417 | 41497004 |
| 4  | 41318687 | 41327191 | NM_026275    | chr4  | 41323746 | 41324476 |
| 19 | 41307015 | 41323315 | NM_133352    | chr19 | 41308006 | 41308623 |
| 19 | 41127884 | 41136424 | NM_153520    | chr19 | 41135090 | 41135715 |
| 13 | 41078934 | 41087433 | NM_008547    | chr13 | 41081359 | 41082288 |
| 6  | 40814602 | 40823101 | NM_139296    | chr6  | 40817866 | 40818458 |
| 3  | 40799420 | 40807980 | NM_178386    | chr3  | 40801809 | 40802259 |
| 7  | 40666353 | 40674852 | NM_021387    | chr7  | 40670516 | 40671334 |
| 19 | 40502199 | 40510709 | NM_001034963 | chr19 | 40506910 | 40507757 |
| 6  | 40494964 | 40503463 | NM_146383    | chr6  | 40501457 | 40502045 |
| 17 | 40392191 | 40402816 | NM_008650    | chr17 | 40401633 | 40402272 |
| 17 | 40395469 | 40404035 | NM_031863    | chr17 | 40401633 | 40402272 |
| 17 | 40341537 | 40350036 | NM_027834    | chr17 | 40343119 | 40343734 |
| 14 | 40089349 | 40099876 | NM_009160    | chr14 | 40091534 | 40092123 |
| 9  | 39766923 | 39775422 | NM_146286    | chr9  | 39773061 | 39773695 |
| 6  | 39571490 | 39579989 | AF454556     | chr6  | 39577347 | 39578269 |
| 15 | 39570006 | 39578505 | NM_029422    | chr15 | 39577292 | 39578017 |
| 9  | 39463800 | 39472299 | NM_001011859 | chr9  | 39470658 | 39471298 |
| 2  | 39045849 | 39054348 | NM_024209    | chr2  | 39049973 | 39050679 |
| 15 | 39022340 | 39030911 | NM_053271    | chr15 | 39026307 | 39027044 |
| 19 | 39013931 | 39022430 | BC020056     | chr19 | 39019057 | 39019615 |
| 5  | 38766056 | 38774555 | AF469480     | chr5  | 38772446 | 38773458 |
| 1  | 38763262 | 38771761 | NM_001029878 | chr1  | 38770330 | 38771106 |
| 5  | 38558186 | 38568166 | NM_178139    | chr5  | 38563690 | 38564503 |
| 12 | 38384603 | 38393470 | NM_178681    | chr12 | 38389805 | 38390970 |
| 8  | 38079892 | 38088457 | NM_015802    | chr8  | 38085838 | 38086499 |
| 6  | 38051489 | 38060182 | NM_080467    | chr6  | 38059049 | 38059569 |
| 13 | 38050347 | 38058846 | BC002158     | chr13 | 38051079 | 38052179 |
| 9  | 37853259 | 37868868 | NM_146424    | chr9  | 37863798 | 37864250 |
| 1  | 37858540 | 37867039 | NM_001033427 | chr1  | 37859638 | 37860253 |
| 18 | 37794309 | 37822874 | NM_033586    | chr18 | 37808874 | 37809532 |
| 18 | 37762040 | 37776140 | NM_175770    | chr18 | 37773700 | 37774556 |
| 1  | 37661858 | 37670357 | BC072639     | chr1  | 37669143 | 37670006 |
| 9  | 37662219 | 37670720 | NM_146798    | chr9  | 37666452 | 37667152 |

|    |          |          |              |       |          |          |
|----|----------|----------|--------------|-------|----------|----------|
| 18 | 37633626 | 37646832 | NM_053147    | chr18 | 37645629 | 37646284 |
| 18 | 37633626 | 37646832 | NM_053147    | chr18 | 37644590 | 37645196 |
| 19 | 37609562 | 37618102 | NM_175353    | chr19 | 37611287 | 37611929 |
| 9  | 37598491 | 37606990 | NM_146417    | chr9  | 37603744 | 37604530 |
| 18 | 37541392 | 37549891 | NM_053136    | chr18 | 37548276 | 37549238 |
| 3  | 37534399 | 37542898 | NM_008006    | chr3  | 37538840 | 37539680 |
| 2  | 37522785 | 37531284 | NM_009261    | chr2  | 37523199 | 37523863 |
| 6  | 37453781 | 37462280 | NM_145364    | chr6  | 37455670 | 37456321 |
| 18 | 37384972 | 37393471 | NM_053126    | chr18 | 37390626 | 37391894 |
| 2  | 37357144 | 37367154 | BC031714     | chr2  | 37363426 | 37364068 |
| 2  | 37357144 | 37367154 | BC031714     | chr2  | 37361833 | 37362525 |
| 17 | 37350919 | 37359418 | NM_146629    | chr17 | 37352148 | 37352762 |
| 18 | 37072649 | 37081214 | NM_007766    | chr18 | 37079749 | 37080868 |
| 18 | 37072649 | 37081214 | NM_007766    | chr18 | 37073477 | 37074263 |
| 2  | 37035500 | 37043999 | NM_001005569 | chr2  | 37036443 | 37037216 |
| 18 | 36792246 | 36802269 | NM_025291    | chr18 | 36799052 | 36799649 |
| 18 | 36799566 | 36810068 | NM_026404    | chr18 | 36799052 | 36799649 |
| 17 | 36691790 | 36707925 | NM_182714    | chr17 | 36706837 | 36707698 |
| 17 | 36691790 | 36707925 | NM_182714    | chr17 | 36701695 | 36702750 |
| 18 | 36639249 | 36647774 | NM_010415    | chr18 | 36646117 | 36646735 |
| 2  | 36627922 | 36641099 | NM_206903    | chr2  | 36629818 | 36630420 |
| 18 | 36401136 | 36415474 | NM_008989    | chr18 | 36404444 | 36405014 |
| 2  | 36237409 | 36245908 | NM_146949    | chr2  | 36243067 | 36243701 |
| 2  | 36192787 | 36201286 | NM_146947    | chr2  | 36198465 | 36199067 |
| 1  | 36186296 | 36194822 | NM_198899    | chr1  | 36187813 | 36188803 |
| 3  | 36119124 | 36130426 | NM_033623    | chr3  | 36129584 | 36130398 |
| 19 | 36119980 | 36128504 | NM_008315    | chr19 | 36120373 | 36120977 |
| 12 | 36117477 | 36126061 | NM_013464    | chr12 | 36119244 | 36119976 |
| 18 | 36098287 | 36106786 | BC062930     | chr18 | 36098821 | 36099548 |
| 5  | 36068792 | 36077326 | NM_177678    | chr5  | 36076050 | 36077109 |
| 5  | 36038308 | 36046958 | NM_194344    | chr5  | 36042663 | 36043284 |
| 13 | 35995782 | 36005013 | BC064755     | chr13 | 36000005 | 36000614 |
| 2  | 35923504 | 35933280 | NM_008500    | chr2  | 35926377 | 35926972 |
| 18 | 35890292 | 35900080 | NM_019912    | chr18 | 35898528 | 35899207 |
| 18 | 35772829 | 35794160 | NM_027222    | chr18 | 35780122 | 35780745 |
| 17 | 35747328 | 35755827 | BC092081     | chr17 | 35750017 | 35750827 |
| 18 | 35691814 | 35708796 | NM_010771    | chr18 | 35704941 | 35705555 |
| 12 | 35563833 | 35572344 | NM_029294    | chr12 | 35566231 | 35566816 |
| 2  | 35508003 | 35521240 | NM_001001602 | chr2  | 35518591 | 35519402 |
| 4  | 35334942 | 35343441 | NM_199157    | chr4  | 35337077 | 35337667 |
| 17 | 35267767 | 35287767 | NM_175137    | chr17 | 35277908 | 35278898 |
| 6  | 35253763 | 35262293 | NM_173375    | chr6  | 35257746 | 35258443 |
| 9  | 35195747 | 35204247 | NM_021339    | chr9  | 35198219 | 35198968 |
| 12 | 35111622 | 35120121 | NM_024124    | chr12 | 35113407 | 35114022 |
| 16 | 35068624 | 35078147 | NM_001012765 | chr16 | 35076047 | 35076641 |
| 13 | 34998198 | 35007581 | NM_011868    | chr13 | 35002244 | 35002911 |
| 13 | 34888178 | 34898165 | BC003769     | chr13 | 34895982 | 34896550 |

|   |    |          |                       |       |          |          |
|---|----|----------|-----------------------|-------|----------|----------|
|   | 2  | 34880906 | 34889405 NM_010406    | chr2  | 34887347 | 34888043 |
|   | 18 | 34857342 | 34865851 BC094039     | chr18 | 34863324 | 34864143 |
|   | 6  | 34844315 | 34853668 NM_009292    | chr6  | 34850925 | 34851931 |
|   | 3  | 34835604 | 34844453 NM_011443    | chr3  | 34835598 | 34836249 |
|   | 7  | 34822063 | 34830562 NM_007678    | chr7  | 34826339 | 34827125 |
|   | 2  | 34777624 | 34789781 NM_009421    | chr2  | 34787549 | 34788184 |
|   | 18 | 34570554 | 34579053 BC029030     | chr18 | 34572593 | 34573208 |
|   | 16 | 34564958 | 34573457 NM_030744    | chr16 | 34568876 | 34569979 |
|   | 17 | 34272591 | 34281090 NM_031176    | chr17 | 34279914 | 34280737 |
|   | 2  | 34248034 | 34256533 NM_177345    | chr2  | 34250913 | 34251919 |
|   | 17 | 34191880 | 34219569 NM_017463    | chr17 | 34213693 | 34214350 |
|   | 11 | 34208822 | 34217321 NM_001025382 | chr11 | 34209415 | 34210333 |
|   | 10 | 34166815 | 34175435 NM_010237    | chr10 | 34170624 | 34171385 |
| X |    | 34121072 | 34129571 NM_001004193 | chrX  | 34128542 | 34129025 |
|   | 6  | 34104638 | 34113212 NM_021435    | chr6  | 34105275 | 34106118 |
|   | 5  | 34032581 | 34041754 NM_008010    | chr5  | 34039529 | 34040199 |
|   | 17 | 33978867 | 33987366 NM_201405    | chr17 | 33986322 | 33987137 |
|   | 17 | 33949727 | 33958226 NM_010381    | chr17 | 33950516 | 33951119 |
|   | 13 | 33910674 | 33919173 NM_148942    | chr13 | 33910694 | 33911353 |
|   | 17 | 33865432 | 33873967 NM_207105    | chr17 | 33868249 | 33868876 |
| X |    | 33857369 | 33865906 NM_201236    | chrX  | 33863855 | 33864580 |
| X |    | 33814492 | 33822991 NM_001039695 | chrX  | 33819048 | 33819995 |
|   | 17 | 33802583 | 33817290 NM_011530    | chr17 | 33811990 | 33813558 |
|   | 7  | 33720144 | 33728702 NM_203502    | chr7  | 33726225 | 33726853 |
|   | 7  | 33724327 | 33732826 NM_009596    | chr7  | 33726225 | 33726853 |
| X |    | 33690820 | 33699404 NM_001039688 | chrX  | 33695448 | 33696288 |
| X |    | 33670437 | 33683863 NM_194063    | chrX  | 33677441 | 33677946 |
|   | 14 | 33643258 | 33651757 NM_008166    | chr14 | 33647642 | 33648798 |
|   | 16 | 33639203 | 33647702 NM_175256    | chr16 | 33645803 | 33646713 |
|   | 14 | 33643258 | 33651757 NM_008166    | chr14 | 33645596 | 33646195 |
|   | 4  | 33531604 | 33540103 NM_177774    | chr4  | 33536537 | 33537082 |
|   | 4  | 33515851 | 33524350 NM_001034867 | chr4  | 33520841 | 33521795 |
|   | 4  | 33515851 | 33524350 NM_001034867 | chr4  | 33515781 | 33516590 |
|   | 7  | 33445573 | 33454072 NM_177446    | chr7  | 33447201 | 33447817 |
|   | 4  | 33354038 | 33362599 NM_019586    | chr4  | 33359957 | 33360600 |
|   | 18 | 33336128 | 33344627 NM_133774    | chr18 | 33342338 | 33343046 |
|   | 18 | 32989941 | 33000288 BC021497     | chr18 | 32994034 | 32994501 |
|   | 14 | 32979082 | 32987581 NM_008919    | chr14 | 32979106 | 32979727 |
|   | 3  | 32925825 | 32934932 NM_029017    | chr3  | 32932325 | 32933077 |
|   | 14 | 32909074 | 32917616 NM_013473    | chr14 | 32912975 | 32913586 |
|   | 3  | 32805556 | 32814084 NM_013531    | chr3  | 32806720 | 32807477 |
|   | 18 | 32700485 | 32709044 NM_001048207 | chr18 | 32704105 | 32704527 |
|   | 8  | 32632158 | 32640674 NM_026453    | chr8  | 32634472 | 32635432 |
| X |    | 32621395 | 32630741 NM_028325    | chrX  | 32626036 | 32626681 |
|   | 2  | 32591795 | 32600298 NM_178595    | chr2  | 32593948 | 32594589 |
|   | 11 | 32425075 | 32433579 NM_027031    | chr11 | 32425086 | 32425523 |
|   | 17 | 32418969 | 32427488 NM_134127    | chr17 | 32419765 | 32420159 |

|    |          |          |              |       |          |          |
|----|----------|----------|--------------|-------|----------|----------|
| 14 | 32237594 | 32246093 | AB005663     | chr14 | 32242248 | 32243084 |
| 2  | 32201344 | 32215748 | NM_008491    | chr2  | 32207793 | 32208428 |
| 18 | 32177472 | 32185971 | NM_032394    | chr18 | 32182719 | 32183369 |
| 11 | 32165771 | 32189466 | NM_001033981 | chr11 | 32178833 | 32179430 |
| 18 | 32090147 | 32098646 | NM_001025381 | chr18 | 32090300 | 32090904 |
| 3  | 32087581 | 32096080 | NM_028231    | chr3  | 32087733 | 32088522 |
| 18 | 32068517 | 32077027 | NM_144862    | chr18 | 32072669 | 32073258 |
| 14 | 32036251 | 32048414 | NM_153800    | chr14 | 32046458 | 32047635 |
| 14 | 32036251 | 32048414 | NM_153800    | chr14 | 32043592 | 32044250 |
| 6  | 31974448 | 31982964 | NM_029587    | chr6  | 31976755 | 31977453 |
| 9  | 31951765 | 31960264 | NM_177379    | chr9  | 31952990 | 31953587 |
| 19 | 31928761 | 31937309 | AY566862     | chr19 | 31929323 | 31930029 |
| 13 | 31808111 | 31816799 | NM_008592    | chr13 | 31810918 | 31811933 |
| 5  | 31797592 | 31806103 | NM_009206    | chr5  | 31799081 | 31800103 |
| 9  | 31660139 | 31668827 | NM_013800    | chr9  | 31660354 | 31661007 |
| 15 | 31473127 | 31481626 | NM_172606    | chr15 | 31477033 | 31477633 |
| 18 | 31457539 | 31466138 | NM_009065    | chr18 | 31458597 | 31459332 |
| 7  | 31005521 | 31014020 | NM_207262    | chr7  | 31012085 | 31012857 |
| 5  | 30918535 | 30927043 | NM_175675    | chr5  | 30919756 | 30920624 |
| 14 | 30908959 | 30917458 | NM_145460    | chr14 | 30917084 | 30917731 |
| 14 | 30912093 | 30920674 | NM_172254    | chr14 | 30917084 | 30917731 |
| 2  | 30768981 | 30777510 | NM_133673    | chr2  | 30773570 | 30774195 |
| 13 | 30661561 | 30670073 | NM_001037955 | chr13 | 30665091 | 30665953 |
| 2  | 30647764 | 30658342 | NM_133346    | chr2  | 30655854 | 30656505 |
| 7  | 30562428 | 30576230 | NM_001033316 | chr7  | 30562569 | 30563185 |
| 16 | 30513470 | 30521969 | NM_177632    | chr16 | 30520690 | 30521337 |
| 19 | 30292939 | 30301453 | NM_010776    | chr19 | 30293602 | 30294837 |
| 2  | 30232059 | 30240718 | NM_138748    | chr2  | 30238425 | 30239019 |
| 2  | 30235005 | 30243757 | NM_007760    | chr2  | 30238425 | 30239019 |
| 16 | 30184780 | 30193279 | NM_027904    | chr16 | 30192225 | 30192980 |
| 15 | 30111182 | 30119681 | NM_008729    | chr15 | 30114474 | 30115181 |
| 5  | 29806758 | 29818418 | NM_019944    | chr5  | 29814472 | 29815064 |
| 14 | 29702549 | 29718032 | NM_018746    | chr14 | 29709658 | 29710705 |
| 19 | 29687156 | 29695655 | BC031519     | chr19 | 29692029 | 29692738 |
| 19 | 29388828 | 29397353 | NM_013754    | chr19 | 29390648 | 29391241 |
| 9  | 29158700 | 29167199 | BC023307     | chr9  | 29159562 | 29160146 |
| 3  | 28990509 | 28999083 | NM_026517    | chr3  | 28992395 | 28993174 |
| 19 | 28955790 | 28964289 | U75214       | chr19 | 28959497 | 28960277 |
| 14 | 28909268 | 28917767 | BC058783     | chr14 | 28913264 | 28914055 |
| 14 | 28835319 | 28843905 | NM_019583    | chr14 | 28835294 | 28835944 |
| 8  | 28691881 | 28701524 | NM_013462    | chr8  | 28696071 | 28696720 |
| 2  | 28659780 | 28668302 | NM_172977    | chr2  | 28666015 | 28666635 |
| 2  | 28656746 | 28665245 | NM_001033294 | chr2  | 28659904 | 28660596 |
| 2  | 28659780 | 28668302 | NM_172977    | chr2  | 28659904 | 28660596 |
| 17 | 28544228 | 28552727 | BC048580     | chr17 | 28550037 | 28550863 |
| 7  | 28491729 | 28508231 | NM_177158    | chr7  | 28496042 | 28496940 |
| 11 | 28481247 | 28490324 | NM_181577    | chr11 | 28486136 | 28486777 |



|    |          |          |              |       |          |          |
|----|----------|----------|--------------|-------|----------|----------|
| 11 | 28481247 | 28490324 | NM_181577    | chr11 | 28485108 | 28485697 |
| 11 | 28481247 | 28490324 | NM_181577    | chr11 | 28483653 | 28484558 |
| 17 | 28297321 | 28305909 | NM_026571    | chr17 | 28302459 | 28303075 |
| 13 | 28017687 | 28026187 | NM_011165    | chr13 | 28019062 | 28019702 |
| 2  | 28009001 | 28017601 | NM_001038613 | chr2  | 28015994 | 28016776 |
| 17 | 28007873 | 28016372 | L28116       | chr17 | 28010878 | 28011444 |
| 3  | 27556424 | 27565316 | NM_177330    | chr3  | 27559689 | 27560598 |
| 7  | 27509964 | 27521924 | BC024577     | chr7  | 27514419 | 27515026 |
| 8  | 27409334 | 27417833 | BC019450     | chr8  | 27410421 | 27411017 |
| 5  | 27374180 | 27382679 | NM_207282    | chr5  | 27380432 | 27381222 |
| 5  | 27374180 | 27382679 | NM_207282    | chr5  | 27374978 | 27375580 |
| 2  | 27246335 | 27254921 | NM_009500    | chr2  | 27252855 | 27253492 |
| 17 | 26858981 | 26867483 | NM_026063    | chr17 | 26864106 | 26864703 |
| 11 | 26679108 | 26687607 | BC098095     | chr11 | 26686766 | 26687742 |
| 11 | 26679108 | 26687607 | BC098095     | chr11 | 26682794 | 26683444 |
| 8  | 26551554 | 26560053 | AF418551     | chr8  | 26556283 | 26556893 |
| 9  | 26495008 | 26507261 | NM_029792    | chr9  | 26501878 | 26502654 |
| 8  | 26476798 | 26485328 | NM_027194    | chr8  | 26483005 | 26483764 |
| 8  | 26479834 | 26488450 | NM_007404    | chr8  | 26483005 | 26483764 |
| 5  | 26433602 | 26442101 | NM_207657    | chr5  | 26435043 | 26435728 |
| 5  | 26367737 | 26376290 | NM_029376    | chr5  | 26374358 | 26374918 |
| 2  | 26171620 | 26194265 | NM_026828    | chr2  | 26173262 | 26174223 |
| 17 | 26165073 | 26173572 | NM_176995    | chr17 | 26169655 | 26170644 |
| 17 | 25974510 | 25984782 | NM_028190    | chr17 | 25977980 | 25978582 |
| 17 | 25834917 | 25853631 | NM_021793    | chr17 | 25844023 | 25844891 |
| 10 | 25765567 | 25774468 | NM_029881    | chr10 | 25773586 | 25774190 |
| 17 | 25710807 | 25719306 | NM_015830    | chr17 | 25718467 | 25719257 |
| 17 | 25710807 | 25719306 | NM_015830    | chr17 | 25715204 | 25716365 |
| 2  | 25693870 | 25702369 | NM_175462    | chr2  | 25697211 | 25698232 |
| 19 | 25671634 | 25680139 | NM_177360    | chr19 | 25677905 | 25678499 |
| 17 | 25558009 | 25585342 | NM_145999    | chr17 | 25562688 | 25563313 |
| 17 | 25510434 | 25530645 | NM_133719    | chr17 | 25515839 | 25516549 |
| 2  | 25469127 | 25482463 | NM_001042630 | chr2  | 25481478 | 25482087 |
| 17 | 25438824 | 25447628 | NM_022422    | chr17 | 25447097 | 25447584 |
| 2  | 25389321 | 25408108 | NM_001005424 | chr2  | 25394869 | 25395608 |
| 4  | 25330955 | 25339506 | NM_021318    | chr4  | 25331546 | 25332334 |
| 15 | 25307135 | 25315634 | NM_027395    | chr15 | 25310580 | 25311193 |
| 2  | 25272847 | 25281351 | NM_027085    | chr2  | 25276298 | 25276907 |
| 19 | 25244697 | 25253196 | BC029018     | chr19 | 25249079 | 25249680 |
| 18 | 25203239 | 25211738 | BC060607     | chr18 | 25206175 | 25206759 |
| 17 | 25070480 | 25079127 | NM_031187    | chr17 | 25076747 | 25077501 |
| 2  | 25030887 | 25042640 | NM_021393    | chr2  | 25035247 | 25036040 |
| 2  | 25034754 | 25043254 | NM_026624    | chr2  | 25035247 | 25036040 |
| 2  | 24996767 | 25005513 | NM_025980    | chr2  | 25004178 | 25005273 |
| 8  | 24871063 | 24879576 | NM_013834    | chr8  | 24876374 | 24876998 |
| 17 | 24840829 | 24849375 | NM_027880    | chr17 | 24847583 | 24848235 |
| 17 | 24842377 | 24850876 | BC107381     | chr17 | 24847583 | 24848235 |

|    |          |          |              |       |          |          |
|----|----------|----------|--------------|-------|----------|----------|
| 7  | 24838749 | 24847248 | NM_011138    | chr7  | 24839817 | 24840547 |
| 13 | 24803122 | 24813247 | NM_024473    | chr13 | 24803438 | 24804052 |
| 7  | 24780025 | 24788543 | NM_175477    | chr7  | 24787755 | 24788510 |
| 17 | 24738323 | 24746822 | NM_134126    | chr17 | 24745686 | 24746490 |
| 17 | 24740861 | 24749382 | BC057153     | chr17 | 24745686 | 24746490 |
| 5  | 24726958 | 24735481 | NM_144908    | chr5  | 24727446 | 24728041 |
| 8  | 24700685 | 24709204 | NM_024240    | chr8  | 24702779 | 24703450 |
| 5  | 24607996 | 24616495 | NM_145401    | chr5  | 24609571 | 24610344 |
| 18 | 24607869 | 24616370 | NM_026529    | chr18 | 24609548 | 24610232 |
| 17 | 24600370 | 24626605 | NM_008340    | chr17 | 24606998 | 24607874 |
| 8  | 24598575 | 24607114 | U73972       | chr8  | 24603359 | 24604047 |
| 10 | 24581910 | 24590409 | BC005508     | chr10 | 24586079 | 24586831 |
| 10 | 24581910 | 24590409 | BC005508     | chr10 | 24585057 | 24585763 |
| 2  | 24582662 | 24591169 | NM_007579    | chr2  | 24584239 | 24584831 |
| 7  | 24564962 | 24581319 | NM_027732    | chr7  | 24566113 | 24566753 |
| 6  | 24475198 | 24483697 | NM_026614    | chr6  | 24481532 | 24482145 |
| 17 | 24474603 | 24483102 | NM_001012402 | chr17 | 24481072 | 24481901 |
| 19 | 24238586 | 24247145 | AF113005     | chr19 | 24241027 | 24241965 |
| 17 | 24210383 | 24218882 | NM_027937    | chr17 | 24216214 | 24216833 |
| 17 | 24168166 | 24176684 | NM_001031621 | chr17 | 24174644 | 24175243 |
| 7  | 24151943 | 24160442 | NM_199013    | chr7  | 24157822 | 24158544 |
| 6  | 24115595 | 24124094 | NM_019481    | chr6  | 24119106 | 24120019 |
| 18 | 24081940 | 24090450 | BC092539     | chr18 | 24083494 | 24084429 |
| 11 | 24057310 | 24065809 | BC010585     | chr11 | 24057595 | 24058214 |
| 7  | 24020640 | 24037580 | NM_009568    | chr7  | 24024295 | 24025042 |
| 5  | 23983818 | 23992317 | BC031173     | chr5  | 23987996 | 23988734 |
| 17 | 23976426 | 23984947 | NM_007634    | chr17 | 23983106 | 23984489 |
| 17 | 23945870 | 23954369 | NM_028056    | chr17 | 23947026 | 23948148 |
| 6  | 23917563 | 23926062 | NM_207022    | chr6  | 23918757 | 23919475 |
| 13 | 23871797 | 23880296 | NM_009198    | chr13 | 23874708 | 23875171 |
| 5  | 23859170 | 23867669 | NM_013569    | chr5  | 23867617 | 23868221 |
| 8  | 23861506 | 23870098 | NM_181325    | chr8  | 23866701 | 23867351 |
| 7  | 23757534 | 23766033 | NM_203489    | chr7  | 23763340 | 23764193 |
| 7  | 23757534 | 23766033 | NM_203489    | chr7  | 23759645 | 23760094 |
| 17 | 23723206 | 23731720 | NM_133731    | chr17 | 23725986 | 23726608 |
| 10 | 23643910 | 23652409 | NM_001008499 | chr10 | 23650211 | 23651268 |
| 8  | 23625542 | 23637957 | NM_011848    | chr8  | 23633274 | 23633900 |
| 13 | 23493806 | 23502305 | NM_175938    | chr13 | 23495145 | 23496014 |
| 16 | 23433438 | 23441937 | NM_008555    | chr16 | 23433947 | 23434560 |
| 8  | 23348463 | 23356966 | NM_139219    | chr8  | 23350688 | 23351111 |
| 13 | 23238085 | 23246584 | NM_134240    | chr13 | 23238927 | 23239575 |
| 16 | 23055870 | 23064445 | NM_009605    | chr16 | 23062074 | 23062734 |
| 16 | 22967670 | 22976253 | NM_023125    | chr16 | 22971653 | 22972480 |
| 16 | 22941844 | 22950402 | NM_201375    | chr16 | 22945061 | 22946013 |
| 16 | 22941844 | 22950402 | NM_201375    | chr16 | 22943876 | 22944483 |
| 17 | 22903662 | 22912161 | D10632       | chr17 | 22910725 | 22911508 |
| 16 | 22801376 | 22809917 | NM_013465    | chr16 | 22803051 | 22803651 |

|   |    |          |                       |       |          |          |
|---|----|----------|-----------------------|-------|----------|----------|
|   | 13 | 22442737 | 22451236 NM_134211    | chr13 | 22447315 | 22447920 |
|   | 16 | 22352327 | 22360874 NM_023794    | chr16 | 22359013 | 22359738 |
|   | 6  | 22232231 | 22240767 NM_053116    | chr6  | 22238990 | 22239587 |
|   | 6  | 22232231 | 22240767 NM_053116    | chr6  | 22236870 | 22237728 |
|   | 13 | 22089343 | 22097842 NM_145850    | chr13 | 22097836 | 22098445 |
|   | 19 | 21873362 | 21881861 BC019745     | chr19 | 21881023 | 21881631 |
|   | 16 | 21857661 | 21866209 NM_025693    | chr16 | 21858588 | 21859235 |
|   | 13 | 21811920 | 21821748 NM_178185    | chr13 | 21814110 | 21815124 |
|   | 19 | 21714406 | 21722905 NM_146096    | chr19 | 21722369 | 21723070 |
|   | 19 | 21717386 | 21725888 NM_025423    | chr19 | 21722369 | 21723070 |
|   | 13 | 21644487 | 21652986 NM_146542    | chr13 | 21646379 | 21646972 |
|   | 13 | 21579420 | 21587919 NM_146540    | chr13 | 21581405 | 21582036 |
|   | 13 | 21480372 | 21488871 NM_001039115 | chr13 | 21485189 | 21485791 |
|   | 13 | 21407667 | 21421413 NM_023685    | chr13 | 21416481 | 21417163 |
|   | 13 | 21407667 | 21421413 NM_023685    | chr13 | 21408613 | 21409576 |
|   | 9  | 21337124 | 21345623 NM_178619    | chr9  | 21342345 | 21342962 |
|   | 9  | 21340649 | 21349174 NM_138303    | chr9  | 21342345 | 21342962 |
|   | 13 | 21297652 | 21310183 NM_010343    | chr13 | 21304981 | 21305666 |
|   | 1  | 21280964 | 21289463 BC061226     | chr1  | 21282851 | 21283448 |
|   | 10 | 21276568 | 21285073 NM_183266    | chr10 | 21277728 | 21278334 |
|   | 2  | 21117478 | 21132850 NM_177588    | chr2  | 21120233 | 21121131 |
|   | 2  | 21120519 | 21129119 AY454124     | chr2  | 21120233 | 21121131 |
|   | 2  | 21052674 | 21061173 NM_001002781 | chr2  | 21057073 | 21057926 |
|   | 9  | 20941443 | 20949942 NM_019798    | chr9  | 20947548 | 20948230 |
|   | 4  | 20867004 | 20875503 NM_172987    | chr4  | 20869723 | 20870319 |
| X |    | 20865859 | 20874416 NM_020049    | chrX  | 20866751 | 20867403 |
|   | 10 | 20839903 | 20856400 NM_010848    | chr10 | 20852389 | 20853134 |
|   | 18 | 20802290 | 20810922 NM_013697    | chr18 | 20806049 | 20806679 |
|   | 9  | 20700508 | 20716290 NM_010066    | chr9  | 20707542 | 20708158 |
|   | 18 | 20695117 | 20703755 NM_007883    | chr18 | 20696798 | 20697758 |
|   | 10 | 20636080 | 20651599 NM_026203    | chr10 | 20650399 | 20651006 |
|   | 9  | 20387720 | 20405035 NM_023371    | chr9  | 20402073 | 20402967 |
| X |    | 20243689 | 20252188 NM_183185    | chrX  | 20243697 | 20244306 |
|   | 11 | 20230088 | 20242016 NM_018861    | chr11 | 20234827 | 20235745 |
| X |    | 20075356 | 20083870 NM_013680    | chrX  | 20076571 | 20077169 |
|   | 9  | 20030103 | 20038602 NM_146825    | chr9  | 20036579 | 20037169 |
|   | 11 | 19916630 | 19925129 BC030460     | chr11 | 19917777 | 19918406 |
|   | 3  | 19884144 | 19893480 NM_205769    | chr3  | 19891219 | 19891805 |
|   | 10 | 19832400 | 19840899 NM_008635    | chr10 | 19834945 | 19835304 |
|   | 9  | 19775938 | 19784437 NM_146558    | chr9  | 19776891 | 19777559 |
|   | 9  | 19632258 | 19640757 NM_146562    | chr9  | 19634317 | 19635011 |
|   | 13 | 19624609 | 19633268 NM_134065    | chr13 | 19632485 | 19633156 |
|   | 13 | 19624648 | 19633180 NM_016687    | chr13 | 19632485 | 19633156 |
|   | 16 | 19517730 | 19526229 NM_146957    | chr16 | 19522868 | 19524007 |
|   | 14 | 19499097 | 19507596 BC049362     | chr14 | 19506272 | 19507043 |
|   | 16 | 19426698 | 19435197 NM_146935    | chr16 | 19433490 | 19434216 |
|   | 5  | 19413596 | 19422184 AB029485     | chr5  | 19419698 | 19420342 |

|    |          |          |              |       |          |          |
|----|----------|----------|--------------|-------|----------|----------|
| 8  | 19188334 | 19201182 | NM_019728    | chr8  | 19191138 | 19191743 |
| 8  | 19151864 | 19160400 | NM_153115    | chr8  | 19158314 | 19158916 |
| 19 | 19065641 | 19074140 | NM_146095    | chr19 | 19066822 | 19067432 |
| 8  | 18946221 | 18956952 | NM_176951    | chr8  | 18956032 | 18956900 |
| 14 | 18748893 | 18757392 | BC021599     | chr14 | 18756619 | 18757224 |
| 14 | 18748893 | 18757392 | BC021599     | chr14 | 18750769 | 18751430 |
| 13 | 18718757 | 18727263 | NM_172120    | chr13 | 18721733 | 18722332 |
| 9  | 18619731 | 18628230 | NM_146566    | chr9  | 18621402 | 18622004 |
| 14 | 18390784 | 18399283 | NM_001024706 | chr14 | 18391168 | 18391989 |
| 3  | 18240476 | 18249355 | NM_021560    | chr3  | 18244874 | 18245920 |
| 19 | 17901702 | 17910271 | BC013068     | chr19 | 17902360 | 17903136 |
| 16 | 17704845 | 17713377 | NM_153790    | chr16 | 17705470 | 17706530 |
| 7  | 17688250 | 17696749 | NM_054060    | chr7  | 17693600 | 17694259 |
| 12 | 17347684 | 17356230 | NM_133699    | chr12 | 17350511 | 17351174 |
| 5  | 17345021 | 17353541 | NM_007643    | chr5  | 17345754 | 17346355 |
| 6  | 17250370 | 17260222 | NM_007616    | chr6  | 17254473 | 17255295 |
| 7  | 17218449 | 17227012 | NM_026087    | chr7  | 17225949 | 17226810 |
| 6  | 17119311 | 17127833 | NM_177689    | chr6  | 17121115 | 17122163 |
| 16 | 17054542 | 17063041 | NM_026940    | chr16 | 17058143 | 17058809 |
| 16 | 17055273 | 17066792 | NM_029779    | chr16 | 17058143 | 17058809 |
| 6  | 17009193 | 17017723 | NM_011570    | chr6  | 17015091 | 17015779 |
| 6  | 17009193 | 17017723 | NM_011570    | chr6  | 17009184 | 17009823 |
| 19 | 16938230 | 16946849 | NM_008023    | chr19 | 16942784 | 16943714 |
| 11 | 16646206 | 16654935 | NM_207655    | chr11 | 16648242 | 16648991 |
| 19 | 16496781 | 16506050 | NM_008137    | chr19 | 16497645 | 16498243 |
| 7  | 15995456 | 16004086 | NM_178900    | chr7  | 15995818 | 15996528 |
| 7  | 15968411 | 15977344 | NM_133789    | chr7  | 15970015 | 15970776 |
| 1  | 15875437 | 15883936 | NM_001033288 | chr1  | 15882811 | 15883610 |
| 1  | 15875437 | 15883936 | NM_001033288 | chr1  | 15879471 | 15880105 |
| X  | 15770657 | 15779286 | NM_173740    | chrX  | 15773625 | 15774092 |
| 9  | 15360050 | 15368549 | NM_181816    | chr9  | 15364094 | 15364805 |
| 18 | 15291965 | 15300464 | AY899808     | chr18 | 15298439 | 15299094 |
| 9  | 14983438 | 14991975 | NM_026955    | chr9  | 14983725 | 14984114 |
| 1  | 14901568 | 14910076 | NM_177781    | chr1  | 14905198 | 14906197 |
| 6  | 14845349 | 14854219 | NM_053242    | chr6  | 14850011 | 14850688 |
| 10 | 14126197 | 14134696 | BC080779     | chr10 | 14132785 | 14133714 |
| 8  | 14084440 | 14098565 | NM_172910    | chr8  | 14097763 | 14098314 |
| 16 | 13894184 | 13902735 | NM_144518    | chr16 | 13901804 | 13902348 |
| 16 | 13894996 | 13904199 | NM_028968    | chr16 | 13901804 | 13902348 |
| 19 | 13590694 | 13599193 | NM_207575    | chr19 | 13592973 | 13593660 |
| 19 | 13531991 | 13540490 | NM_001011842 | chr19 | 13537373 | 13538022 |
| 19 | 13519035 | 13527534 | NM_146690    | chr19 | 13526565 | 13527493 |
| 19 | 13402779 | 13411278 | NM_146694    | chr19 | 13406322 | 13406908 |
| 13 | 13183244 | 13191743 | BC003212     | chr13 | 13188501 | 13189253 |
| 17 | 13141000 | 13149499 | BC061173     | chr17 | 13140997 | 13141635 |
| 14 | 13115380 | 13123879 | NM_147027    | chr14 | 13116708 | 13117306 |
| 18 | 12960268 | 12968791 | BC057194     | chr18 | 12964509 | 12965753 |

|   |    |          |                       |       |          |          |
|---|----|----------|-----------------------|-------|----------|----------|
|   | 8  | 12909888 | 12918434 NM_178076    | chr8  | 12910143 | 12911060 |
|   | 15 | 12763602 | 12772101 BC088999     | chr15 | 12771729 | 12772337 |
|   | 15 | 12766818 | 12775366 NM_029998    | chr15 | 12771729 | 12772337 |
|   | 14 | 12751993 | 12760544 NM_025435    | chr14 | 12756519 | 12757157 |
| X |    | 12709406 | 12717905 BC009740     | chrX  | 12711336 | 12712400 |
|   | 15 | 12513572 | 12522071 BC085315     | chr15 | 12519446 | 12520734 |
|   | 19 | 12455310 | 12463809 NM_146684    | chr19 | 12455895 | 12456661 |
|   | 8  | 12390321 | 12398820 NM_009233    | chr8  | 12396454 | 12397515 |
|   | 18 | 12377395 | 12385922 NM_008720    | chr18 | 12384686 | 12385361 |
|   | 2  | 12334707 | 12343313 NM_024185    | chr2  | 12342578 | 12343079 |
|   | 19 | 12174090 | 12182589 NM_146678    | chr19 | 12176624 | 12177051 |
|   | 19 | 12124296 | 12132795 NM_146681    | chr19 | 12127695 | 12128354 |
|   | 7  | 12113518 | 12122017 NM_134226    | chr7  | 12119597 | 12120290 |
|   | 19 | 11933486 | 11951313 NM_001011775 | chr19 | 11944445 | 11945207 |
|   | 6  | 11869881 | 11878414 NM_029404    | chr6  | 11872577 | 11873596 |
|   | 8  | 11834493 | 11842992 NM_029326    | chr8  | 11835113 | 11835724 |
|   | 8  | 11776534 | 11785106 U96634       | chr8  | 11781061 | 11781528 |
|   | 19 | 11755576 | 11764101 NM_133353    | chr19 | 11764014 | 11765025 |
|   | 19 | 11756086 | 11766599 NM_001033283 | chr19 | 11764014 | 11765025 |
|   | 4  | 11688879 | 11697378 AF177669     | chr4  | 11690477 | 11691158 |
|   | 4  | 11461088 | 11469587 BC028830     | chr4  | 11461321 | 11462066 |
|   | 8  | 11437193 | 11445692 BC013560     | chr8  | 11443263 | 11443857 |
|   | 8  | 11437193 | 11445692 BC013560     | chr8  | 11441122 | 11441715 |
|   | 1  | 11393326 | 11401825 NM_177173    | chr1  | 11395323 | 11396070 |
|   | 19 | 11330678 | 11339194 NM_007641    | chr19 | 11331821 | 11332521 |
|   | 8  | 11306996 | 11315495 NM_009932    | chr8  | 11313055 | 11313710 |
|   | 8  | 11310162 | 11318702 NM_009931    | chr8  | 11313055 | 11313710 |
|   | 12 | 11174217 | 11182716 NM_173417    | chr12 | 11179686 | 11180474 |
|   | 16 | 11164749 | 11173787 NM_146066    | chr16 | 11171695 | 11172133 |
|   | 14 | 11136002 | 11145111 NM_080433    | chr14 | 11140542 | 11141296 |
|   | 14 | 11136002 | 11145111 NM_080433    | chr14 | 11136636 | 11137381 |
|   | 14 | 11136002 | 11145111 NM_080433    | chr14 | 11135997 | 11136610 |
|   | 15 | 10979616 | 10988693 NM_178717    | chr15 | 10986557 | 10987258 |
|   | 19 | 10934277 | 10942824 NM_133804    | chr19 | 10941199 | 10941752 |
|   | 12 | 10923772 | 10932304 BC108372     | chr12 | 10929800 | 10930391 |
|   | 12 | 10923772 | 10932304 BC108372     | chr12 | 10923812 | 10924406 |
|   | 16 | 10696004 | 10716404 NM_009896    | chr16 | 10701825 | 10702438 |
| X |    | 10450183 | 10484020 BC049545     | chrX  | 10472674 | 10473016 |
|   | 2  | 10282363 | 10292934 NM_177386    | chr2  | 10288050 | 10289224 |
|   | 3  | 10177255 | 10185754 NM_011598    | chr3  | 10178581 | 10179207 |
|   | 8  | 10147883 | 10156382 BC072580     | chr8  | 10148978 | 10149566 |
|   | 1  | 10017476 | 10025975 BC019581     | chr1  | 10019208 | 10020043 |
|   | 2  | 9995769  | 10004282 NM_020615    | chr2  | 9995305  | 9996046  |
|   | 17 | 9510532  | 9519053 NM_026226     | chr17 | 9516928  | 9517332  |
|   | 10 | 9362899  | 9371398 NM_177271     | chr10 | 9363519  | 9364527  |
|   | 1  | 9281288  | 9290452 NM_027671     | chr1  | 9286523  | 9287463  |
| X |    | 9272047  | 9280620 NM_016911     | chrX  | 9272515  | 9273102  |

|   |    |         |                   |       |         |         |
|---|----|---------|-------------------|-------|---------|---------|
|   | 11 | 9195290 | 9203789 AY160971  | chr11 | 9197886 | 9198521 |
|   | 4  | 9190509 | 9199008 NM_028940 | chr4  | 9197439 | 9198300 |
|   | 12 | 8941315 | 8950634 NM_008640 | chr12 | 8947084 | 8948179 |
|   | 19 | 8932604 | 8941103 NM_146093 | chr19 | 8938649 | 8939321 |
|   | 19 | 8832041 | 8840540 NM_025791 | chr19 | 8835637 | 8836314 |
|   | 6  | 8725596 | 8734107 NM_010492 | chr6  | 8726916 | 8727608 |
|   | 19 | 8679084 | 8687659 NM_008766 | chr19 | 8686147 | 8686736 |
|   | 12 | 8333455 | 8341967 NM_021429 | chr12 | 8336252 | 8336850 |
|   | 17 | 8143276 | 8151821 NM_134114 | chr17 | 8143394 | 8144348 |
| X |    | 8141132 | 8149631 BC104363  | chrX  | 8141179 | 8142502 |
| X |    | 7954650 | 7963149 NM_199319 | chrX  | 7962191 | 7962962 |
| X |    | 7244909 | 7253411 NM_009515 | chrX  | 7246387 | 7246977 |
|   | 18 | 6488336 | 6496855 NM_027497 | chr18 | 6492503 | 6493020 |
|   | 19 | 6422013 | 6430515 NM_020253 | chr19 | 6429581 | 6430570 |
|   | 19 | 6270734 | 6279425 NM_010119 | chr19 | 6278295 | 6279112 |
|   | 11 | 6127627 | 6136146 NM_207242 | chr11 | 6129241 | 6129867 |
|   | 7  | 6058596 | 6067095 NM_146915 | chr7  | 6065193 | 6065575 |
|   | 2  | 6028888 | 6037387 BC023193  | chr2  | 6030946 | 6031398 |
|   | 2  | 5756306 | 5765064 NM_016918 | chr2  | 5756485 | 5757127 |
|   | 19 | 5698367 | 5706984 NM_010609 | chr19 | 5702059 | 5702677 |
|   | 4  | 5645496 | 5653995 BC055683  | chr4  | 5646807 | 5647183 |
|   | 10 | 5633866 | 5642365 M38651    | chr10 | 5637764 | 5638427 |
|   | 19 | 5607186 | 5616035 NM_178637 | chr19 | 5609513 | 5610453 |
|   | 19 | 5595873 | 5604374 NM_026616 | chr19 | 5600198 | 5600801 |
|   | 1  | 5572574 | 5581137 NM_011011 | chr1  | 5579586 | 5580534 |
|   | 17 | 5372695 | 5381249 NM_175349 | chr17 | 5380108 | 5381189 |
|   | 9  | 5302860 | 5311373 NM_007609 | chr9  | 5308943 | 5309584 |
|   | 19 | 5095919 | 5112996 NM_029576 | chr19 | 5110527 | 5111644 |
|   | 19 | 5062078 | 5070577 NM_054042 | chr19 | 5068673 | 5069658 |
|   | 2  | 5049048 | 5057547 NM_028804 | chr2  | 5050199 | 5050835 |
|   | 19 | 4987367 | 4995971 NM_153553 | chr19 | 4993102 | 4994351 |
|   | 19 | 4940551 | 4949050 NM_172835 | chr19 | 4945066 | 4945655 |
|   | 19 | 4872704 | 4881226 NM_027476 | chr19 | 4880385 | 4881436 |
|   | 19 | 4875376 | 4883884 NM_013456 | chr19 | 4880385 | 4881436 |
|   | 5  | 4761478 | 4769977 NM_021457 | chr5  | 4762756 | 4763617 |
|   | 16 | 4631788 | 4640340 NM_026393 | chr16 | 4639030 | 4639846 |
|   | 16 | 4635617 | 4644116 BC002011  | chr16 | 4639030 | 4639846 |
|   | 13 | 4605883 | 4614410 NM_018859 | chr13 | 4605873 | 4607150 |
|   | 15 | 4319491 | 4327990 NM_177355 | chr15 | 4325198 | 4325862 |
|   | 14 | 4277097 | 4285596 NM_025940 | chr14 | 4281639 | 4282388 |
|   | 14 | 4277097 | 4285596 NM_025940 | chr14 | 4276969 | 4277557 |
|   | 13 | 4276109 | 4284645 NM_013777 | chr13 | 4276787 | 4277687 |
|   | 8  | 4214813 | 4223312 NM_207203 | chr8  | 4214814 | 4215403 |
|   | 19 | 4142663 | 4158371 NM_011778 | chr19 | 4157230 | 4157827 |
|   | 12 | 4127363 | 4136575 NM_138305 | chr12 | 4127385 | 4128537 |
|   | 2  | 4064143 | 4072643 NM_172475 | chr2  | 4068821 | 4069323 |
|   | 4  | 3944230 | 3952810 NM_181989 | chr4  | 3947105 | 3947835 |

|    |         |                      |       |         |         |
|----|---------|----------------------|-------|---------|---------|
| 15 | 3939579 | 3951752 NM_145930    | chr15 | 3941353 | 3942176 |
| 6  | 3915855 | 3924359 NM_009364    | chr6  | 3918210 | 3919122 |
| 13 | 3831002 | 3839519 NM_020036    | chr13 | 3834639 | 3835271 |
| 13 | 3831002 | 3839519 NM_020036    | chr13 | 3831054 | 3831683 |
| 13 | 3801049 | 3809562 NM_027416    | chr13 | 3808153 | 3808745 |
| 5  | 3657010 | 3665651 NM_029141    | chr5  | 3660332 | 3661178 |
| 5  | 3599907 | 3608414 NM_172991    | chr5  | 3606191 | 3606810 |
| 5  | 3543839 | 3552349 NM_001042501 | chr5  | 3550751 | 3551567 |
| 2  | 3335422 | 3351636 NM_175683    | chr2  | 3347699 | 3348458 |
| 9  | 3329478 | 3340944 NM_026303    | chr9  | 3339724 | 3340378 |
| 17 | 3277055 | 3285665 BC067048     | chr17 | 3277669 | 3278435 |
| 11 | 3253645 | 3262144 NM_001034030 | chr11 | 3256347 | 3256932 |
| 7  | 3227072 | 3236143 NM_027328    | chr7  | 3231739 | 3232350 |
| 7  | 3230208 | 3238971 NM_023524    | chr7  | 3231739 | 3232350 |
| 11 | 3096395 | 3105264 NM_023743    | chr11 | 3103728 | 3104331 |
| 11 | 3042349 | 3050848 BC048950     | chr11 | 3050128 | 3050831 |
| 11 | 3042349 | 3050848 BC048950     | chr11 | 3043446 | 3044475 |
| Y  | 1946029 | 1954528 NM_011564    | chrY  | 1952691 | 1953280 |

| gene overlap percent | region overlap percent | length(bps) | probes in region | p-value(region) |
|----------------------|------------------------|-------------|------------------|-----------------|
| 0.0552188            | 1                      | 920         | 26               | 0.0190145       |
| 0.0771373            | 1                      | 1108        | 27               | 0.0274536       |
| 0.0708172            | 1                      | 604         | 17               | 0.0493989       |
| 0.0395249            | 1                      | 609         | 14               | 0.032503        |
| 0.0448525            | 1                      | 701         | 16               | 0.032706        |
| 0.0864771            | 1                      | 745         | 18               | 0.048931        |
| 0.0697647            | 1                      | 593         | 12               | 0.0474215       |
| 0.126588             | 1                      | 1076        | 30               | 0.0172402       |
| 0.145662             | 1                      | 1254        | 32               | 0.00464328      |
| 0.0788049            | 1                      | 728         | 14               | 0.0351159       |
| 0.0815294            | 1                      | 693         | 17               | 0.0497255       |
| 0.0858248            | 1                      | 732         | 20               | 0.0430077       |
| 0.07                 | 1                      | 595         | 11               | 0.0484896       |
| 0.0628404            | 1                      | 600         | 17               | 0.0470684       |
| 0.0992941            | 1                      | 844         | 24               | 0.0213538       |
| 0.181529             | 1                      | 1543        | 43               | 0.0145389       |
| 0.0734872            | 1                      | 640         | 18               | 0.0466888       |
| 0.0910588            | 1                      | 774         | 18               | 0.0284423       |
| 0.0440041            | 1                      | 695         | 17               | 0.0493459       |
| 0.09                 | 1                      | 765         | 22               | 0.0417895       |
| 0.0365954            | 1                      | 620         | 14               | 0.0400417       |
| 0.0952104            | 1                      | 817         | 23               | 0.0311259       |
| 0.112391             | 1                      | 966         | 26               | 0.021751        |
| 0.0734118            | 1                      | 624         | 18               | 0.0417101       |
| 0.100471             | 1                      | 854         | 24               | 0.0168429       |
| 0.0841176            | 1                      | 715         | 20               | 0.03516         |
| 0.0713454            | 1                      | 613         | 13               | 0.0455942       |
| 0.0727462            | 1                      | 907         | 24               | 0.0403153       |
| 0.0431485            | 1                      | 751         | 21               | 0.0365989       |
| 0.0690588            | 1                      | 587         | 16               | 0.0434579       |
| 0.0705331            | 1                      | 602         | 17               | 0.041869        |
| 0.139647             | 1                      | 1187        | 33               | 0.0038488       |
| 0.060903             | 1                      | 522         | 15               | 0.046371        |
| 0.0983529            | 1                      | 836         | 23               | 0.0355043       |
| 0.126706             | 1                      | 1077        | 24               | 0.0295193       |
| 0.0722821            | 1                      | 617         | 17               | 0.0395385       |
| 0.0810399            | 1                      | 692         | 20               | 0.046574        |
| 0.0910363            | 1                      | 781         | 22               | 0.0286542       |
| 0.0697647            | 1                      | 593         | 16               | 0.0471831       |
| 0.10047              | 1                      | 855         | 24               | 0.0305962       |
| 0.0957647            | 1                      | 814         | 16               | 0.0414452       |
| 0.0676735            | 1                      | 587         | 16               | 0.0489575       |
| 0.0702353            | 1                      | 597         | 17               | 0.0439699       |
| 0.140941             | 1                      | 1198        | 33               | 0.01295         |



|           |          |      |    |            |
|-----------|----------|------|----|------------|
| 0.0682621 | 1        | 676  | 19 | 0.0494342  |
| 0.0871765 | 1        | 741  | 21 | 0.0212125  |
| 0.0871765 | 1        | 741  | 21 | 0.0212125  |
| 0.0975294 | 1        | 829  | 23 | 0.0316996  |
| 0.0752941 | 1        | 640  | 18 | 0.0476157  |
| 0.0719803 | 1        | 615  | 13 | 0.032141   |
| 0.0436565 | 1        | 607  | 11 | 0.0497696  |
| 0.0457422 | 0.9922   | 641  | 18 | 0.0199679  |
| 0.0512285 | 1        | 638  | 18 | 0.0357427  |
| 0.0700444 | 1        | 600  | 14 | 0.0477569  |
| 0.0677507 | 1        | 600  | 14 | 0.0477569  |
| 0.0368758 | 1        | 627  | 17 | 0.039768   |
| 0.0721176 | 1        | 613  | 15 | 0.0437316  |
| 0.107765  | 1        | 916  | 20 | 0.0353542  |
| 0.112365  | 1        | 956  | 22 | 0.0264296  |
| 0.0855409 | 1        | 733  | 18 | 0.0422574  |
| 0.0785481 | 0.997037 | 675  | 19 | 0.0436345  |
| 0.0982353 | 0.932961 | 895  | 24 | 0.0167193  |
| 0.0950942 | 1        | 818  | 23 | 0.0319468  |
| 0.070483  | 1        | 607  | 17 | 0.0488515  |
| 0.0818824 | 1        | 696  | 19 | 0.0465299  |
| 0.0730765 | 1        | 624  | 15 | 0.0485602  |
| 0.0778933 | 1        | 667  | 19 | 0.0329002  |
| 0.0753457 | 1        | 643  | 17 | 0.0405801  |
| 0.084077  | 1        | 716  | 20 | 0.0327237  |
| 0.126353  | 1        | 1074 | 25 | 0.00805953 |
| 0.129206  | 1        | 1102 | 31 | 0.0244169  |
| 0.0710427 | 1        | 605  | 17 | 0.042787   |
| 0.0742307 | 1        | 632  | 14 | 0.0453823  |
| 0.0725882 | 1        | 617  | 14 | 0.0412863  |
| 0.137059  | 1        | 1165 | 31 | 0.0223778  |
| 0.136337  | 1        | 1165 | 31 | 0.0223778  |
| 0.0721176 | 1        | 613  | 17 | 0.0458502  |
| 0.0717379 | 1        | 613  | 17 | 0.0458502  |
| 0.0715375 | 1        | 610  | 14 | 0.0499638  |
| 0.0734118 | 1        | 624  | 13 | 0.0418337  |
| 0.0338182 | 1        | 358  | 10 | 0.0444466  |
| 0.0702868 | 1        | 598  | 16 | 0.0433343  |
| 0.124     | 1        | 1054 | 29 | 0.0189792  |
| 0.0795722 | 1        | 677  | 14 | 0.0427694  |
| 0.0685882 | 1        | 583  | 17 | 0.048931   |
| 0.0711765 | 1        | 605  | 13 | 0.0236225  |
| 0.0948235 | 1        | 806  | 20 | 0.0454882  |
| 0.0887144 | 1        | 757  | 21 | 0.049699   |
| 0.0753821 | 1        | 651  | 18 | 0.0395385  |
| 0.11299   | 1        | 962  | 26 | 0.0244434  |
| 0.129294  | 1        | 1099 | 24 | 0.0326354  |

|           |          |      |    |            |
|-----------|----------|------|----|------------|
| 0.0899848 | 1        | 770  | 19 | 0.0342685  |
| 0.092     | 1        | 782  | 22 | 0.0217952  |
| 0.0821256 | 1        | 1020 | 24 | 0.0486308  |
| 0.0792941 | 1        | 674  | 19 | 0.0293957  |
| 0.0792941 | 1        | 674  | 19 | 0.0293957  |
| 0.0550959 | 1        | 879  | 23 | 0.0162162  |
| 0.074     | 1        | 629  | 12 | 0.0435374  |
| 0.0776471 | 1        | 660  | 19 | 0.0310817  |
| 0.0774705 | 1        | 664  | 19 | 0.0329796  |
| 0.0754163 | 1        | 770  | 22 | 0.0343391  |
| 0.0689453 | 1        | 587  | 17 | 0.0440317  |
| 0.0938824 | 1        | 798  | 19 | 0.0342685  |
| 0.115394  | 1        | 982  | 19 | 0.0475539  |
| 0.0647235 | 1        | 1057 | 28 | 0.019447   |
| 0.0661419 | 1        | 563  | 16 | 0.0460002  |
| 0.0911765 | 1        | 775  | 22 | 0.0214774  |
| 0.0705344 | 1        | 755  | 21 | 0.0311965  |
| 0.059417  | 1        | 636  | 18 | 0.0381261  |
| 0.0737446 | 1        | 630  | 18 | 0.0428312  |
| 0.0703447 | 1        | 598  | 10 | 0.0472096  |
| 0.0701176 | 1        | 596  | 17 | 0.0290426  |
| 0.0971422 | 1        | 826  | 23 | 0.0488251  |
| 0.0918056 | 1        | 782  | 21 | 0.045859   |
| 0.0694573 | 0.765985 | 782  | 21 | 0.045859   |
| 0.08157   | 1        | 744  | 15 | 0.0461591  |
| 0.0450511 | 1        | 741  | 20 | 0.0498314  |
| 0.0716471 | 1        | 609  | 17 | 0.0427341  |
| 0.0712948 | 1        | 609  | 17 | 0.0427341  |
| 0.0565846 | 1        | 611  | 12 | 0.0493106  |
| 0.122826  | 1        | 1045 | 28 | 0.0325294  |
| 0.126     | 1        | 1071 | 28 | 0.00873925 |
| 0.0777647 | 1        | 661  | 17 | 0.0316379  |
| 0.0861794 | 1        | 757  | 21 | 0.0350276  |
| 0.086455  | 1        | 757  | 21 | 0.0350276  |
| 0.0834406 | 1        | 713  | 13 | 0.0355485  |
| 0.0989412 | 1        | 841  | 18 | 0.0166929  |
| 0.0436464 | 1        | 395  | 11 | 0.0447114  |
| 0.135528  | 1        | 1157 | 28 | 0.0231016  |
| 0.0745002 | 1        | 641  | 14 | 0.0314613  |
| 0.0725113 | 1        | 641  | 14 | 0.0314613  |
| 0.0331702 | 1        | 705  | 15 | 0.0329002  |
| 0.0796471 | 1        | 677  | 19 | 0.0466535  |
| 0.0772941 | 1        | 657  | 19 | 0.0430077  |
| 0.0897014 | 1        | 763  | 14 | 0.0318939  |
| 0.108187  | 1        | 925  | 26 | 0.0167988  |
| 0.076064  | 1        | 647  | 19 | 0.0488692  |
| 0.0741176 | 1        | 630  | 18 | 0.0210095  |

|            |          |      |    |           |
|------------|----------|------|----|-----------|
| 0.119224   | 1        | 1014 | 27 | 0.0470242 |
| 0.088618   | 1        | 756  | 21 | 0.0344627 |
| 0.0369583  | 1        | 591  | 17 | 0.0494253 |
| 0.101647   | 1        | 864  | 24 | 0.0472184 |
| 0.0723529  | 1        | 615  | 14 | 0.0384351 |
| 0.0722326  | 1        | 616  | 13 | 0.0412863 |
| 0.101517   | 1        | 863  | 24 | 0.0298459 |
| 0.116927   | 1        | 994  | 28 | 0.0387617 |
| 0.109357   | 1        | 942  | 21 | 0.0236225 |
| 0.126439   | 1        | 1076 | 23 | 0.03644   |
| 0.0164427  | 1        | 613  | 17 | 0.0384086 |
| 0.075241   | 1        | 640  | 16 | 0.0284335 |
| 0.0269196  | 1        | 623  | 18 | 0.0368461 |
| 0.00509643 | 0.304976 | 623  | 18 | 0.0368461 |
| 0.0698824  | 1        | 594  | 15 | 0.0284335 |
| 0.0701176  | 1        | 596  | 17 | 0.0485867 |
| 0.0485998  | 1        | 715  | 20 | 0.0363606 |
| 0.0432463  | 1        | 616  | 17 | 0.0460532 |
| 0.0816471  | 1        | 694  | 16 | 0.0495401 |
| 0.0985882  | 1        | 838  | 24 | 0.0345333 |
| 0.0637038  | 1        | 678  | 18 | 0.040995  |
| 0.0803529  | 1        | 683  | 20 | 0.0454529 |
| 0.0709412  | 1        | 603  | 11 | 0.0453735 |
| 0.1        | 1        | 850  | 24 | 0.0400681 |
| 0.071935   | 1        | 629  | 16 | 0.0434579 |
| 0.0967059  | 1        | 822  | 23 | 0.023543  |
| 0.0728235  | 1        | 619  | 15 | 0.0350276 |
| 0.115882   | 1        | 985  | 28 | 0.0261913 |
| 0.0875294  | 1        | 744  | 18 | 0.0170813 |
| 0.0782353  | 1        | 665  | 18 | 0.0391501 |
| 0.0737647  | 1        | 627  | 15 | 0.0424074 |
| 0.0812941  | 1        | 691  | 19 | 0.0414099 |
| 0.0429137  | 1        | 618  | 14 | 0.045912  |
| 0.0727059  | 1        | 618  | 14 | 0.045912  |
| 0.0422193  | 1        | 608  | 17 | 0.038488  |
| 0.0715294  | 1        | 608  | 17 | 0.038488  |
| 0.0615294  | 1        | 523  | 15 | 0.0475362 |
| 0.0497647  | 1        | 423  | 12 | 0.0438552 |
| 0.0445987  | 1        | 829  | 17 | 0.0391942 |
| 0.037696   | 1        | 589  | 16 | 0.0355043 |
| 0.0689695  | 1        | 593  | 17 | 0.0455324 |
| 0.0848233  | 1        | 816  | 23 | 0.0460885 |
| 0.0501801  | 1        | 641  | 18 | 0.0461856 |
| 0.0403529  | 0.167317 | 2050 | 44 | 0.020833  |
| 0.0888235  | 1        | 755  | 21 | 0.0426987 |
| 0.108235   | 1        | 920  | 25 | 0.03245   |
| 0.0740171  | 1        | 1058 | 29 | 0.013153  |

|            |           |      |    |            |
|------------|-----------|------|----|------------|
| 0.113551   | 1         | 967  | 27 | 0.013868   |
| 0.100915   | 1         | 860  | 21 | 0.016481   |
| 0.0389471  | 1         | 617  | 15 | 0.0460709  |
| 0.0859294  | 1         | 742  | 20 | 0.0171254  |
| 0.0649227  | 1         | 680  | 19 | 0.0489663  |
| 0.0935026  | 1         | 803  | 16 | 0.0481807  |
| 0.0724162  | 1         | 618  | 17 | 0.038541   |
| 0.0870588  | 1         | 740  | 21 | 0.0406066  |
| 0.0704706  | 1         | 599  | 17 | 0.0431048  |
| 0.0469649  | 1         | 400  | 11 | 0.0386911  |
| 0.0698715  | 1         | 609  | 12 | 0.0469183  |
| 0.0855897  | 1         | 746  | 15 | 0.0494253  |
| 0.0962353  | 1         | 818  | 23 | 0.0213538  |
| 0.0994533  | 1         | 855  | 20 | 0.0129853  |
| 0.0983111  | 1         | 879  | 25 | 0.0102223  |
| 0.0481519  | 1         | 667  | 14 | 0.0269769  |
| 0.0771637  | 1         | 666  | 15 | 0.0232517  |
| 0.116621   | 1         | 1063 | 29 | 0.0104606  |
| 0.119176   | 1         | 1013 | 27 | 0.0286012  |
| 0.10708    | 1         | 912  | 26 | 0.0445967  |
| 0.0416925  | 1         | 673  | 19 | 0.0323441  |
| 0.112309   | 1         | 958  | 23 | 0.0239314  |
| 0.0755556  | 1         | 646  | 15 | 0.0450998  |
| 0.0958824  | 1         | 815  | 22 | 0.0464416  |
| 0.0870588  | 1         | 740  | 17 | 0.0334652  |
| 0.0727059  | 1         | 618  | 17 | 0.0489133  |
| 0.157877   | 1         | 1368 | 35 | 0.0331121  |
| 0.0747076  | 1         | 1188 | 32 | 0.00307198 |
| 0.0749912  | 1         | 639  | 18 | 0.0374287  |
| 0.0379414  | 1         | 592  | 14 | 0.0485514  |
| 0.0696471  | 1         | 592  | 14 | 0.0485514  |
| 0.0780117  | 1         | 667  | 18 | 0.0372433  |
| 0.0770588  | 1         | 655  | 12 | 0.0408979  |
| 0.0761896  | 1         | 863  | 23 | 0.0210801  |
| 0.0483748  | 1         | 637  | 13 | 0.0230134  |
| 0.111176   | 1         | 945  | 21 | 0.0232958  |
| 0.107882   | 1         | 917  | 20 | 0.0347187  |
| 0.0857566  | 1         | 752  | 21 | 0.0408626  |
| 0.101529   | 1         | 863  | 21 | 0.0307463  |
| 0.0524706  | 0.610959  | 730  | 19 | 0.0430607  |
| 0.0784706  | 1         | 667  | 19 | 0.0428841  |
| 0.0464487  | 1         | 395  | 10 | 0.0486308  |
| 0.0458459  | 1         | 607  | 17 | 0.0495401  |
| 0.0722411  | 1         | 616  | 10 | 0.0491164  |
| 0.00551902 | 0.0762987 | 616  | 10 | 0.0491164  |
| 0.110184   | 1         | 938  | 25 | 0.0240815  |
| 0.0620187  | 1         | 1039 | 27 | 0.0193676  |

|           |   |      |    |            |
|-----------|---|------|----|------------|
| 0.0751765 | 1 | 639  | 13 | 0.0407655  |
| 0.0841662 | 1 | 859  | 21 | 0.0202592  |
| 0.0954118 | 1 | 811  | 21 | 0.0493459  |
| 0.0683809 | 1 | 601  | 16 | 0.042019   |
| 0.105294  | 1 | 895  | 21 | 0.0478011  |
| 0.0725882 | 1 | 617  | 17 | 0.0354337  |
| 0.158754  | 1 | 1351 | 37 | 0.034189   |
| 0.0466613 | 1 | 638  | 12 | 0.0323617  |
| 0.0511422 | 1 | 600  | 13 | 0.0367843  |
| 0.0851765 | 1 | 724  | 14 | 0.025388   |
| 0.0889358 | 1 | 758  | 19 | 0.0177963  |
| 0.0571229 | 1 | 490  | 14 | 0.0394944  |
| 0.0858824 | 1 | 730  | 20 | 0.034498   |
| 0.0824706 | 1 | 701  | 19 | 0.0440052  |
| 0.100588  | 1 | 855  | 20 | 0.0300577  |
| 0.0451499 | 1 | 384  | 11 | 0.0485161  |
| 0.116118  | 1 | 987  | 24 | 0.0350806  |
| 0.0744706 | 1 | 633  | 18 | 0.0398033  |
| 0.153611  | 1 | 1306 | 37 | 0.011211   |
| 0.0428444 | 1 | 958  | 25 | 0.0129853  |
| 0.127934  | 1 | 1090 | 27 | 0.0353454  |
| 0.0807059 | 1 | 686  | 15 | 0.0391413  |
| 0.0760028 | 1 | 648  | 17 | 0.0487456  |
| 0.072     | 1 | 612  | 16 | 0.0162162  |
| 0.0700935 | 1 | 600  | 14 | 0.0255734  |
| 0.0631887 | 1 | 539  | 14 | 0.0474744  |
| 0.104525  | 1 | 1095 | 23 | 0.00805953 |
| 0.0689412 | 1 | 586  | 17 | 0.016684   |
| 0.0830588 | 1 | 706  | 17 | 0.0303137  |
| 0.0742353 | 1 | 631  | 16 | 0.0495224  |
| 0.0694477 | 1 | 591  | 13 | 0.0375876  |
| 0.0426881 | 1 | 606  | 12 | 0.0386911  |
| 0.0710059 | 1 | 1008 | 27 | 0.0171254  |
| 0.0698585 | 1 | 642  | 18 | 0.0498844  |
| 0.113294  | 1 | 963  | 22 | 0.0108755  |
| 0.0535139 | 1 | 648  | 17 | 0.0496725  |
| 0.106732  | 1 | 910  | 25 | 0.0430783  |
| 0.107059  | 1 | 910  | 25 | 0.0430783  |
| 0.119596  | 1 | 1018 | 29 | 0.019244   |
| 0.119765  | 1 | 1018 | 29 | 0.019244   |
| 0.0776471 | 1 | 660  | 16 | 0.0450027  |
| 0.124     | 1 | 1054 | 22 | 0.0063823  |
| 0.0867113 | 1 | 738  | 20 | 0.0350541  |
| 0.0644972 | 1 | 551  | 16 | 0.0499108  |
| 0.0714789 | 1 | 609  | 16 | 0.0497608  |
| 0.0657647 | 1 | 559  | 13 | 0.0456207  |
| 0.0272188 | 1 | 372  | 11 | 0.0287513  |

|           |          |      |    |           |
|-----------|----------|------|----|-----------|
| 0.0812657 | 1        | 714  | 20 | 0.0119701 |
| 0.0622353 | 0.998113 | 530  | 15 | 0.0458237 |
| 0.0639986 | 1        | 1089 | 30 | 0.0225896 |
| 0.0474118 | 1        | 403  | 11 | 0.0471567 |
| 0.0474118 | 1        | 403  | 11 | 0.0471567 |
| 0.105485  | 1        | 1402 | 34 | 0.0270387 |
| 0.0756224 | 1        | 644  | 18 | 0.0436168 |
| 0.0864256 | 1        | 736  | 16 | 0.0201886 |
| 0.114953  | 1        | 1087 | 29 | 0.0219011 |
| 0.066587  | 1        | 613  | 17 | 0.0461944 |
| 0.105602  | 1        | 903  | 25 | 0.0384704 |
| 0.0730905 | 1        | 622  | 11 | 0.0191999 |
| 0.0705058 | 1        | 775  | 20 | 0.045912  |
| 0.0677647 | 1        | 576  | 14 | 0.0454529 |
| 0.0701176 | 1        | 596  | 17 | 0.0456825 |
| 0.100235  | 1        | 852  | 19 | 0.0462386 |
| 0.173765  | 1        | 1477 | 36 | 0.0172137 |
| 0.0744619 | 1        | 640  | 18 | 0.0446408 |
| 0.0912941 | 1        | 776  | 19 | 0.0104518 |
| 0.0698824 | 1        | 594  | 14 | 0.0454088 |
| 0.0593532 | 1        | 791  | 18 | 0.0227574 |
| 0.0527787 | 1        | 604  | 17 | 0.0407037 |
| 0.0489339 | 1        | 560  | 12 | 0.0482336 |
| 0.0744706 | 1        | 633  | 18 | 0.0410392 |
| 0.107533  | 1        | 915  | 25 | 0.0323176 |
| 0.0913896 | 1        | 778  | 20 | 0.0480482 |
| 0.0701858 | 1        | 597  | 12 | 0.0485337 |
| 0.082108  | 1        | 698  | 13 | 0.0447997 |
| 0.0996471 | 1        | 847  | 23 | 0.0216804 |
| 0.0709511 | 1        | 605  | 17 | 0.0492576 |
| 0.0380243 | 1        | 475  | 10 | 0.0440759 |
| 0.11477   | 1        | 976  | 24 | 0.0167017 |
| 0.114621  | 1        | 976  | 24 | 0.0167017 |
| 0.0967061 | 1        | 825  | 20 | 0.0173373 |
| 0.0794118 | 1        | 675  | 18 | 0.0330238 |
| 0.122941  | 1        | 1045 | 26 | 0.0266503 |
| 0.116235  | 1        | 988  | 21 | 0.0347187 |
| 0.138129  | 1        | 1177 | 33 | 0.0239314 |
| 0.0805882 | 1        | 685  | 12 | 0.0146096 |
| 0.101534  | 1        | 1079 | 24 | 0.0237902 |
| 0.0969005 | 1        | 866  | 23 | 0.0307463 |
| 0.085377  | 1        | 745  | 17 | 0.0345686 |
| 0.102353  | 1        | 870  | 17 | 0.0248407 |
| 0.0472777 | 1        | 653  | 19 | 0.0347187 |
| 0.128706  | 1        | 1094 | 31 | 0.0151569 |
| 0.0425421 | 1        | 573  | 11 | 0.0480482 |
| 0.0625882 | 1        | 843  | 20 | 0.0326442 |

|           |          |      |    |            |
|-----------|----------|------|----|------------|
| 0.0661438 | 1        | 565  | 16 | 0.0498844  |
| 0.0790213 | 1        | 675  | 19 | 0.01694    |
| 0.0681176 | 1        | 579  | 12 | 0.0434844  |
| 0.0695294 | 1        | 591  | 17 | 0.0454265  |
| 0.0902591 | 1        | 770  | 22 | 0.0271182  |
| 0.0484617 | 1        | 597  | 17 | 0.0463622  |
| 0.0680497 | 1        | 597  | 17 | 0.0463622  |
| 0.0689412 | 1        | 586  | 17 | 0.0491164  |
| 0.0769412 | 1        | 654  | 15 | 0.0202857  |
| 0.0697647 | 1        | 593  | 13 | 0.0458855  |
| 0.0887059 | 1        | 754  | 17 | 0.0328384  |
| 0.0741176 | 1        | 630  | 18 | 0.0211243  |
| 0.0418092 | 1        | 611  | 17 | 0.0469183  |
| 0.0431093 | 1        | 630  | 18 | 0.0460973  |
| 0.0732814 | 1        | 630  | 18 | 0.0460973  |
| 0.0693494 | 1        | 598  | 14 | 0.044173   |
| 0.0703529 | 1        | 598  | 16 | 0.0439081  |
| 0.0349437 | 0.498328 | 598  | 16 | 0.0439081  |
| 0.0760296 | 1        | 648  | 18 | 0.0386999  |
| 0.136689  | 1        | 1165 | 32 | 0.00460797 |
| 0.0626239 | 1        | 537  | 13 | 0.0441288  |
| 0.110941  | 1        | 943  | 27 | 0.0413481  |
| 0.0616588 | 1        | 1182 | 33 | 0.0089776  |
| 0.0893672 | 1        | 764  | 16 | 0.0327237  |
| 0.0773726 | 1        | 662  | 19 | 0.039821   |
| 0.0782353 | 1        | 665  | 16 | 0.0404301  |
| 0.0729412 | 1        | 620  | 14 | 0.0351247  |
| 0.130824  | 1        | 1112 | 31 | 0.017302   |
| 0.0704706 | 1        | 599  | 10 | 0.0406066  |
| 0.0496947 | 1        | 586  | 14 | 0.0350629  |
| 0.111792  | 1        | 967  | 27 | 0.0242669  |
| 0.0844706 | 1        | 718  | 14 | 0.0340743  |
| 0.0706228 | 1        | 601  | 10 | 0.0478893  |
| 0.10094   | 1        | 859  | 20 | 0.0211419  |
| 0.0613511 | 1        | 524  | 13 | 0.0492399  |
| 0.0414236 | 1        | 774  | 22 | 0.0452587  |
| 0.0711765 | 1        | 605  | 12 | 0.0494342  |
| 0.107275  | 1        | 929  | 21 | 0.0323264  |
| 0.0594118 | 1        | 505  | 14 | 0.0227397  |
| 0.0581176 | 1        | 494  | 10 | 0.0414364  |
| 0.057988  | 1        | 494  | 10 | 0.0414364  |
| 0.0711765 | 1        | 605  | 16 | 0.0456913  |
| 0.0439326 | 1        | 391  | 11 | 0.0318585  |
| 0.0721176 | 1        | 613  | 15 | 0.0488162  |
| 0.0904997 | 1        | 824  | 22 | 0.042381   |
| 0.0775311 | 1        | 716  | 20 | 0.0291397  |
| 0.0755684 | 1        | 708  | 17 | 0.045912   |

|           |   |      |    |            |
|-----------|---|------|----|------------|
| 0.0808235 | 1 | 687  | 17 | 0.0402447  |
| 0.0533623 | 1 | 615  | 18 | 0.0456207  |
| 0.0688235 | 1 | 585  | 16 | 0.0454     |
| 0.117529  | 1 | 999  | 22 | 0.00685899 |
| 0.038615  | 1 | 629  | 17 | 0.0456825  |
| 0.112644  | 1 | 988  | 26 | 0.0335799  |
| 0.073045  | 1 | 652  | 18 | 0.0475627  |
| 0.0875294 | 1 | 744  | 20 | 0.0465917  |
| 0.122066  | 1 | 1040 | 22 | 0.0169753  |
| 0.0777647 | 1 | 661  | 19 | 0.0399446  |
| 0.0776095 | 1 | 661  | 19 | 0.0399446  |
| 0.136353  | 1 | 1159 | 27 | 0.0127469  |
| 0.0742353 | 1 | 631  | 16 | 0.0454     |
| 0.121059  | 1 | 1029 | 29 | 0.0224131  |
| 0.0700599 | 1 | 596  | 17 | 0.0474126  |
| 0.0676461 | 1 | 594  | 17 | 0.0493017  |
| 0.113294  | 1 | 963  | 21 | 0.0447114  |
| 0.103059  | 1 | 876  | 22 | 0.0323794  |
| 0.0804706 | 1 | 684  | 19 | 0.0416836  |
| 0.08031   | 1 | 684  | 19 | 0.0416836  |
| 0.0741    | 1 | 636  | 17 | 0.0226514  |
| 0.0722353 | 1 | 614  | 10 | 0.0487633  |
| 0.0703529 | 1 | 598  | 17 | 0.0464593  |
| 0.0815744 | 1 | 715  | 20 | 0.0441553  |
| 0.0636471 | 1 | 541  | 12 | 0.0435462  |
| 0.0835294 | 1 | 710  | 19 | 0.0364224  |
| 0.105128  | 1 | 898  | 18 | 0.0315143  |
| 0.0706398 | 1 | 742  | 21 | 0.0318232  |
| 0.0730588 | 1 | 621  | 14 | 0.0392913  |
| 0.0687059 | 1 | 584  | 15 | 0.0464593  |
| 0.0678352 | 1 | 596  | 17 | 0.0360869  |
| 0.0910607 | 1 | 1147 | 32 | 0.048419   |
| 0.132494  | 1 | 1147 | 32 | 0.048419   |
| 0.101765  | 1 | 865  | 24 | 0.0495313  |
| 0.0815752 | 1 | 696  | 12 | 0.01694    |
| 0.0755937 | 1 | 643  | 18 | 0.0348069  |
| 0.0794733 | 1 | 676  | 12 | 0.042381   |
| 0.0818824 | 1 | 696  | 20 | 0.0331121  |
| 0.0705882 | 1 | 600  | 14 | 0.0233576  |
| 0.073557  | 1 | 627  | 16 | 0.0488692  |
| 0.0674374 | 1 | 595  | 10 | 0.0489575  |
| 0.0754118 | 1 | 641  | 18 | 0.0314348  |
| 0.068401  | 1 | 610  | 13 | 0.0326089  |
| 0.0742353 | 1 | 631  | 18 | 0.0393973  |
| 0.0835184 | 1 | 865  | 24 | 0.0351954  |
| 0.101765  | 1 | 865  | 24 | 0.0351954  |
| 0.0775294 | 1 | 659  | 14 | 0.0324588  |



|           |          |      |    |           |
|-----------|----------|------|----|-----------|
| 0.0937647 | 1        | 797  | 14 | 0.0177257 |
| 0.0936709 | 1        | 814  | 23 | 0.0485867 |
| 0.0591639 | 1        | 859  | 24 | 0.0335799 |
| 0.100076  | 1        | 1051 | 28 | 0.0234547 |
| 0.0931765 | 1        | 792  | 22 | 0.0323882 |
| 0.0670588 | 1        | 570  | 14 | 0.0404477 |
| 0.0708328 | 1        | 603  | 17 | 0.0439081 |
| 0.0717647 | 1        | 610  | 17 | 0.0498049 |
| 0.0647402 | 1        | 811  | 23 | 0.0270917 |
| 0.0956471 | 1        | 813  | 21 | 0.0353984 |
| 0.0777647 | 1        | 661  | 19 | 0.0315408 |
| 0.133467  | 1        | 1135 | 28 | 0.0281951 |
| 0.0770588 | 1        | 655  | 19 | 0.0499638 |
| 0.0787059 | 1        | 669  | 18 | 0.016428  |
| 0.0968235 | 1        | 823  | 19 | 0.0387087 |
| 0.119882  | 1        | 1019 | 29 | 0.0237019 |
| 0.0274123 | 0.903226 | 496  | 14 | 0.0257675 |
| 0.0716295 | 1        | 611  | 15 | 0.0492664 |
| 0.0493602 | 1        | 1084 | 22 | 0.0147684 |
| 0.127882  | 1        | 1087 | 25 | 0.0215303 |
| 0.0557813 | 1        | 549  | 15 | 0.0245582 |
| 0.092966  | 0.988778 | 802  | 15 | 0.0158278 |
| 0.0571194 | 1        | 487  | 14 | 0.0485161 |
| 0.0723939 | 1        | 616  | 13 | 0.0498844 |
| 0.0752941 | 1        | 640  | 15 | 0.0332003 |
| 0.0719376 | 1        | 646  | 18 | 0.0484896 |
| 0.103412  | 1        | 879  | 23 | 0.0466447 |
| 0.036146  | 1        | 595  | 11 | 0.0313554 |
| 0.0848968 | 1        | 724  | 20 | 0.0131707 |
| 0.0716456 | 1        | 613  | 15 | 0.046062  |
| 0.0678519 | 1        | 603  | 17 | 0.0498226 |
| 0.077895  | 1        | 672  | 19 | 0.0210625 |
| 0.0752949 | 1        | 651  | 18 | 0.0399799 |
| 0.0741219 | 1        | 631  | 15 | 0.0493017 |
| 0.0495554 | 1        | 1070 | 30 | 0.0346834 |
| 0.0997647 | 1        | 848  | 18 | 0.0414717 |
| 0.102588  | 1        | 872  | 24 | 0.0346392 |
| 0.0430902 | 1        | 618  | 12 | 0.0497343 |
| 0.0474829 | 1        | 681  | 20 | 0.0362988 |
| 0.0705882 | 1        | 600  | 17 | 0.0487456 |
| 0.0741917 | 1        | 631  | 18 | 0.0325471 |
| 0.0905882 | 1        | 770  | 18 | 0.0442524 |
| 0.0649929 | 1        | 598  | 17 | 0.0447909 |
| 0.0765882 | 1        | 651  | 18 | 0.0475098 |
| 0.123882  | 1        | 1053 | 29 | 0.0162162 |
| 0.103176  | 1        | 877  | 23 | 0.0266768 |
| 0.0717104 | 1        | 618  | 12 | 0.0432461 |

|           |          |     |    |           |
|-----------|----------|-----|----|-----------|
| 0.0732089 | 1        | 796 | 22 | 0.0293339 |
| 0.0804706 | 1        | 684 | 17 | 0.0424074 |
| 0.0449218 | 1        | 778 | 22 | 0.0115994 |
| 0.113853  | 1        | 969 | 23 | 0.0351336 |
| 0.0388674 | 1        | 582 | 11 | 0.0225985 |
| 0.102821  | 1        | 893 | 18 | 0.0153422 |
| 0.10879   | 1        | 927 | 24 | 0.0350453 |
| 0.072     | 1        | 612 | 16 | 0.0482424 |
| 0.0510363 | 1        | 623 | 14 | 0.0408979 |
| 0.0979702 | 1        | 835 | 23 | 0.039821  |
| 0.112353  | 1        | 955 | 26 | 0.0160838 |
| 0.0909412 | 1        | 773 | 18 | 0.0307816 |
| 0.0323656 | 1        | 670 | 19 | 0.0311259 |
| 0.0865515 | 1        | 827 | 23 | 0.03516   |
| 0.0775294 | 1        | 659 | 15 | 0.047192  |
| 0.0512309 | 1        | 616 | 16 | 0.0445261 |
| 0.105133  | 1        | 895 | 19 | 0.0268975 |
| 0.0876471 | 1        | 745 | 21 | 0.049496  |
| 0.0705882 | 1        | 600 | 17 | 0.0484984 |
| 0.0575294 | 1        | 489 | 13 | 0.0381084 |
| 0.0748526 | 1        | 673 | 15 | 0.0494077 |
| 0.0933459 | 1        | 794 | 22 | 0.040995  |
| 0.0706311 | 1        | 601 | 12 | 0.0468124 |
| 0.0825882 | 1        | 702 | 16 | 0.0356809 |
| 0.0721176 | 1        | 613 | 11 | 0.0475274 |
| 0.0801163 | 1        | 689 | 19 | 0.0435462 |
| 0.0703529 | 1        | 598 | 17 | 0.0474215 |
| 0.0702879 | 1        | 603 | 17 | 0.0469448 |
| 0.0785882 | 1        | 668 | 19 | 0.0360163 |
| 0.0274443 | 1        | 672 | 19 | 0.0434844 |
| 0.0522353 | 0.950749 | 467 | 12 | 0.0459561 |
| 0.092     | 1        | 782 | 22 | 0.0399975 |
| 0.0394852 | 1        | 632 | 18 | 0.0453205 |
| 0.0575409 | 1        | 921 | 26 | 0.028407  |
| 0.0756471 | 1        | 643 | 17 | 0.0395915 |
| 0.103152  | 1        | 877 | 24 | 0.0275242 |
| 0.113759  | 1        | 969 | 24 | 0.0491252 |
| 0.0386944 | 1        | 639 | 16 | 0.0489928 |
| 0.0710344 | 1        | 605 | 17 | 0.0350012 |
| 0.106824  | 1        | 908 | 25 | 0.0291662 |
| 0.0697456 | 1        | 595 | 17 | 0.0494342 |
| 0.0749412 | 1        | 637 | 14 | 0.0481012 |
| 0.0581176 | 1        | 494 | 14 | 0.0465829 |
| 0.0685882 | 1        | 583 | 17 | 0.0448968 |
| 0.0611182 | 1        | 669 | 19 | 0.0448703 |
| 0.0405773 | 1        | 641 | 12 | 0.0499197 |
| 0.0382351 | 1        | 604 | 17 | 0.041816  |

|           |   |      |    |            |
|-----------|---|------|----|------------|
| 0.0815294 | 1 | 693  | 15 | 0.024567   |
| 0.087746  | 1 | 749  | 21 | 0.0273565  |
| 0.0868204 | 1 | 749  | 21 | 0.0273565  |
| 0.10978   | 1 | 944  | 23 | 0.0165516  |
| 0.0714118 | 1 | 607  | 17 | 0.0495842  |
| 0.074265  | 1 | 634  | 15 | 0.0470154  |
| 0.0869412 | 1 | 739  | 17 | 0.0423015  |
| 0.0968235 | 1 | 823  | 16 | 0.0326707  |
| 0.07      | 1 | 595  | 17 | 0.00923359 |
| 0.146471  | 1 | 1245 | 28 | 0.00918946 |
| 0.0574118 | 1 | 488  | 14 | 0.0234547  |
| 0.0836132 | 1 | 722  | 18 | 0.0477569  |
| 0.0727187 | 1 | 620  | 17 | 0.0469183  |
| 0.0751765 | 1 | 639  | 18 | 0.0479864  |
| 0.0533239 | 1 | 454  | 13 | 0.0408185  |
| 0.0808235 | 1 | 687  | 17 | 0.0395208  |
| 0.0672795 | 1 | 871  | 24 | 0.0311259  |
| 0.0789412 | 1 | 671  | 19 | 0.0435197  |
| 0.105389  | 1 | 972  | 20 | 0.0454794  |
| 0.0692483 | 1 | 608  | 14 | 0.0357956  |
| 0.0722098 | 1 | 614  | 18 | 0.0415247  |
| 0.0751765 | 1 | 639  | 16 | 0.0373581  |
| 0.106235  | 1 | 903  | 25 | 0.0182112  |
| 0.0407292 | 1 | 639  | 16 | 0.0377818  |
| 0.128118  | 1 | 1089 | 20 | 0.0241521  |
| 0.110275  | 1 | 938  | 26 | 0.0168076  |
| 0.0242099 | 1 | 632  | 18 | 0.0422574  |
| 0.0440348 | 1 | 375  | 11 | 0.0497255  |
| 0.0475188 | 1 | 858  | 19 | 0.0384262  |
| 0.0716471 | 1 | 609  | 17 | 0.0426811  |
| 0.0854213 | 1 | 733  | 21 | 0.0207712  |
| 0.0292933 | 1 | 647  | 18 | 0.0486926  |
| 0.0932941 | 1 | 793  | 17 | 0.0103812  |
| 0.0465882 | 1 | 396  | 11 | 0.0498049  |
| 0.0906422 | 1 | 772  | 20 | 0.0168871  |
| 0.105084  | 1 | 895  | 25 | 0.0242845  |
| 0.066     | 1 | 561  | 11 | 0.0378436  |
| 0.0813722 | 1 | 695  | 20 | 0.0404477  |
| 0.124458  | 1 | 1063 | 30 | 0.0446761  |
| 0.0899154 | 1 | 765  | 22 | 0.0319998  |
| 0.133976  | 1 | 1140 | 32 | 0.00814781 |
| 0.193295  | 1 | 1649 | 44 | 0.0343214  |
| 0.0293512 | 1 | 456  | 13 | 0.0454088  |
| 0.0644706 | 1 | 548  | 14 | 0.0489751  |
| 0.0591765 | 1 | 503  | 10 | 0.0479511  |
| 0.0439937 | 1 | 501  | 12 | 0.0456913  |
| 0.052687  | 1 | 600  | 16 | 0.0405537  |

|           |   |      |    |            |
|-----------|---|------|----|------------|
| 0.0875646 | 1 | 745  | 17 | 0.0280186  |
| 0.0717329 | 1 | 623  | 18 | 0.0422574  |
| 0.0645998 | 1 | 623  | 18 | 0.0422574  |
| 0.0713367 | 1 | 610  | 17 | 0.04796    |
| 0.0698495 | 1 | 594  | 14 | 0.0480659  |
| 0.0380969 | 1 | 639  | 17 | 0.0340654  |
| 0.0528108 | 1 | 636  | 12 | 0.0275331  |
| 0.0512148 | 1 | 605  | 11 | 0.0485955  |
| 0.104941  | 1 | 892  | 25 | 0.0351689  |
| 0.0835873 | 1 | 713  | 20 | 0.0295281  |
| 0.0429185 | 1 | 620  | 14 | 0.0444289  |
| 0.113174  | 1 | 963  | 25 | 0.0315849  |
| 0.134471  | 1 | 1143 | 30 | 0.0168694  |
| 0.0483987 | 1 | 804  | 22 | 0.0180611  |
| 0.0971765 | 1 | 826  | 22 | 0.0328384  |
| 0.0918824 | 1 | 781  | 22 | 0.0344627  |
| 0.0803288 | 1 | 684  | 20 | 0.0485426  |
| 0.0716471 | 1 | 609  | 16 | 0.0440405  |
| 0.0761176 | 1 | 647  | 18 | 0.0377377  |
| 0.0538785 | 1 | 896  | 26 | 0.0350012  |
| 0.03838   | 1 | 561  | 12 | 0.00813015 |
| 0.0123705 | 1 | 774  | 21 | 0.0264031  |
| 0.0407403 | 1 | 361  | 10 | 0.0418337  |
| 0.0728212 | 1 | 620  | 16 | 0.0492664  |
| 0.0851528 | 1 | 741  | 18 | 0.0350276  |
| 0.0433455 | 1 | 369  | 10 | 0.0419308  |
| 0.0551928 | 1 | 913  | 21 | 0.0321057  |
| 0.0677584 | 1 | 662  | 13 | 0.0499903  |
| 0.0758444 | 1 | 741  | 21 | 0.0487368  |
| 0.126954  | 1 | 1080 | 28 | 0.0277802  |
| 0.072625  | 1 | 620  | 17 | 0.0216186  |
| 0.132471  | 1 | 1126 | 31 | 0.01694    |
| 0.0727059 | 1 | 618  | 12 | 0.0430783  |
| 0.0972941 | 1 | 827  | 19 | 0.0331209  |
| 0.0720244 | 1 | 613  | 17 | 0.0467947  |
| 0.0661176 | 1 | 562  | 15 | 0.0317261  |
| 0.115591  | 1 | 989  | 21 | 0.0193411  |
| 0.108     | 1 | 918  | 22 | 0.0453558  |
| 0.167529  | 1 | 1424 | 36 | 0.0349923  |
| 0.249412  | 1 | 2120 | 52 | 0.0180876  |
| 0.0844706 | 1 | 718  | 20 | 0.0171519  |
| 0.0871656 | 1 | 743  | 18 | 0.0406949  |
| 0.0689736 | 1 | 590  | 10 | 0.0437934  |
| 0.0711948 | 1 | 609  | 15 | 0.0388764  |
| 0.07      | 1 | 595  | 17 | 0.0489928  |
| 0.0805501 | 1 | 697  | 19 | 0.0349747  |
| 0.0722229 | 1 | 617  | 11 | 0.0496725  |

|           |   |      |    |           |
|-----------|---|------|----|-----------|
| 0.0665962 | 1 | 567  | 16 | 0.0497431 |
| 0.0969412 | 1 | 824  | 21 | 0.0489045 |
| 0.110471  | 1 | 939  | 23 | 0.0095867 |
| 0.118     | 1 | 1003 | 28 | 0.0163662 |
| 0.0675504 | 1 | 586  | 10 | 0.049496  |
| 0.0786858 | 1 | 673  | 19 | 0.0494342 |
| 0.039966  | 1 | 612  | 13 | 0.0324588 |
| 0.0563573 | 1 | 863  | 20 | 0.0471831 |
| 0.0764706 | 1 | 650  | 18 | 0.0300048 |
| 0.0716128 | 1 | 611  | 18 | 0.0475627 |
| 0.0602466 | 1 | 513  | 11 | 0.0492223 |
| 0.0708235 | 1 | 602  | 17 | 0.0497166 |
| 0.0550588 | 1 | 468  | 13 | 0.0498844 |
| 0.0702935 | 1 | 606  | 16 | 0.0458414 |
| 0.0399439 | 1 | 598  | 17 | 0.047598  |
| 0.0388752 | 1 | 582  | 15 | 0.0485955 |
| 0.0716631 | 1 | 611  | 17 | 0.0469448 |
| 0.118565  | 1 | 1011 | 29 | 0.0326354 |
| 0.100118  | 1 | 851  | 23 | 0.0331915 |
| 0.0906745 | 1 | 773  | 22 | 0.0455765 |
| 0.0857647 | 1 | 729  | 20 | 0.0338889 |
| 0.0901176 | 1 | 766  | 21 | 0.0406596 |
| 0.0738824 | 1 | 628  | 11 | 0.0365724 |
| 0.0777647 | 1 | 661  | 16 | 0.0474215 |
| 0.0749678 | 1 | 640  | 12 | 0.0403153 |
| 0.0888235 | 1 | 755  | 17 | 0.0335623 |
| 0.0752941 | 1 | 640  | 18 | 0.0320704 |
| 0.065515  | 1 | 603  | 17 | 0.0311788 |
| 0.102706  | 1 | 873  | 25 | 0.018476  |
| 0.0490091 | 1 | 638  | 17 | 0.0426193 |
| 0.0337352 | 1 | 638  | 15 | 0.0347628 |
| 0.105412  | 1 | 896  | 25 | 0.0326972 |
| 0.0548126 | 1 | 791  | 23 | 0.0436256 |
| 0.0723529 | 1 | 615  | 11 | 0.0384968 |
| 0.0719791 | 1 | 635  | 18 | 0.0390706 |
| 0.0725352 | 1 | 618  | 17 | 0.04668   |
| 0.0718824 | 1 | 611  | 17 | 0.0417366 |
| 0.0402449 | 1 | 618  | 18 | 0.0499197 |
| 0.114168  | 1 | 971  | 28 | 0.0217599 |
| 0.074     | 1 | 629  | 17 | 0.0383203 |
| 0.088988  | 1 | 758  | 20 | 0.0495048 |
| 0.0750588 | 1 | 638  | 15 | 0.0499638 |
| 0.0974118 | 1 | 828  | 19 | 0.0350629 |
| 0.0692941 | 1 | 589  | 12 | 0.0476687 |
| 0.0677452 | 1 | 603  | 17 | 0.0482424 |
| 0.119294  | 1 | 1014 | 28 | 0.0273565 |
| 0.0890588 | 1 | 757  | 21 | 0.0493017 |

|           |   |      |    |            |
|-----------|---|------|----|------------|
| 0.0844052 | 1 | 1004 | 24 | 0.0250878  |
| 0.0702746 | 1 | 609  | 17 | 0.0439876  |
| 0.0622353 | 1 | 529  | 14 | 0.0497078  |
| 0.0816647 | 1 | 832  | 21 | 0.0480482  |
| 0.0785882 | 1 | 668  | 19 | 0.0474744  |
| 0.124471  | 1 | 1058 | 29 | 0.0212743  |
| 0.0445151 | 1 | 420  | 12 | 0.0352571  |
| 0.0915708 | 1 | 780  | 22 | 0.0421161  |
| 0.0909412 | 1 | 773  | 22 | 0.0350629  |
| 0.0724706 | 1 | 616  | 18 | 0.048163   |
| 0.0695897 | 1 | 592  | 17 | 0.0493724  |
| 0.129059  | 1 | 1097 | 31 | 0.0346657  |
| 0.0767059 | 1 | 652  | 18 | 0.0486308  |
| 0.0564706 | 1 | 480  | 13 | 0.0469801  |
| 0.0467965 | 1 | 745  | 21 | 0.0493812  |
| 0.099871  | 1 | 929  | 18 | 0.0444554  |
| 0.0717647 | 1 | 610  | 17 | 0.0497873  |
| 0.118102  | 1 | 1008 | 24 | 0.0323264  |
| 0.0426727 | 1 | 714  | 20 | 0.0448968  |
| 0.0774095 | 1 | 661  | 19 | 0.0141593  |
| 0.127475  | 1 | 1088 | 30 | 0.0094278  |
| 0.0766972 | 1 | 653  | 19 | 0.0460356  |
| 0.0821211 | 1 | 700  | 20 | 0.0357868  |
| 0.0995294 | 1 | 846  | 24 | 0.0233135  |
| 0.07      | 1 | 595  | 17 | 0.0477216  |
| 0.0833723 | 1 | 714  | 20 | 0.0499197  |
| 0.131294  | 1 | 1116 | 30 | 0.0243728  |
| 0.08      | 1 | 680  | 18 | 0.0319027  |
| 0.0758824 | 1 | 645  | 17 | 0.034498   |
| 0.112588  | 1 | 957  | 22 | 0.0326001  |
| 0.0685882 | 1 | 583  | 16 | 0.0482778  |
| 0.110118  | 1 | 936  | 26 | 0.0302961  |
| 0.0857647 | 1 | 729  | 16 | 0.0275595  |
| 0.0374903 | 1 | 625  | 18 | 0.0474833  |
| 0.133882  | 1 | 1138 | 32 | 0.00993097 |
| 0.117294  | 1 | 997  | 24 | 0.0126852  |
| 0.126588  | 1 | 1076 | 30 | 0.0135326  |
| 0.0712611 | 1 | 608  | 17 | 0.0165428  |
| 0.0715294 | 1 | 608  | 17 | 0.0165428  |
| 0.0844706 | 1 | 718  | 20 | 0.0435374  |
| 0.0754118 | 1 | 641  | 18 | 0.0309317  |
| 0.0828235 | 1 | 704  | 20 | 0.0333769  |
| 0.0688235 | 1 | 585  | 16 | 0.048984   |
| 0.0648784 | 1 | 595  | 17 | 0.0380378  |
| 0.07      | 1 | 595  | 17 | 0.0380378  |
| 0.0503407 | 1 | 591  | 17 | 0.0431931  |
| 0.072     | 1 | 612  | 16 | 0.0355043  |

|           |          |      |    |           |
|-----------|----------|------|----|-----------|
| 0.0767242 | 1        | 653  | 13 | 0.0339683 |
| 0.0702353 | 1        | 597  | 13 | 0.0406066 |
| 0.102945  | 1        | 881  | 25 | 0.0234989 |
| 0.0330386 | 0.290984 | 976  | 28 | 0.012897  |
| 0.0775294 | 1        | 659  | 15 | 0.0491958 |
| 0.0796471 | 1        | 677  | 18 | 0.0489663 |
| 0.0760145 | 1        | 650  | 18 | 0.0402006 |
| 0.103059  | 1        | 876  | 24 | 0.0167193 |
| 0.0408632 | 1        | 676  | 19 | 0.0298017 |
| 0.0749412 | 1        | 637  | 18 | 0.0474303 |
| 0.0758802 | 1        | 722  | 20 | 0.0422574 |
| 0.0709412 | 1        | 603  | 12 | 0.045859  |
| 0.0841176 | 1        | 715  | 20 | 0.0233047 |
| 0.124297  | 1        | 1061 | 29 | 0.0245317 |
| 0.0754118 | 1        | 641  | 18 | 0.0161279 |
| 0.0705882 | 1        | 600  | 17 | 0.042787  |
| 0.0775294 | 1        | 659  | 19 | 0.0361487 |
| 0.0722736 | 1        | 617  | 17 | 0.0399004 |
| 0.0695294 | 1        | 591  | 17 | 0.0480306 |
| 0.0796471 | 1        | 677  | 17 | 0.0406596 |
| 0.0569485 | 1        | 879  | 20 | 0.0330944 |
| 0.0761616 | 1        | 654  | 17 | 0.0475627 |
| 0.105352  | 1        | 994  | 17 | 0.0169489 |
| 0.0730991 | 1        | 647  | 17 | 0.0379407 |
| 0.07331   | 1        | 629  | 17 | 0.0347628 |
| 0.0251458 | 1        | 608  | 10 | 0.0428047 |
| 0.0994118 | 1        | 845  | 23 | 0.0427694 |
| 0.0945882 | 1        | 804  | 23 | 0.0497255 |
| 0.0712364 | 1        | 609  | 11 | 0.0239756 |
| 0.0528233 | 1        | 609  | 11 | 0.0239756 |
| 0.0484408 | 1        | 640  | 17 | 0.0354337 |
| 0.0716471 | 1        | 609  | 17 | 0.0453911 |
| 0.0737407 | 1        | 852  | 20 | 0.0297929 |
| 0.116139  | 1        | 1006 | 27 | 0.0330767 |
| 0.0758338 | 1        | 648  | 17 | 0.0322117 |
| 0.0623757 | 1        | 533  | 14 | 0.0244434 |
| 0.0929412 | 1        | 790  | 20 | 0.0424604 |
| 0.0951765 | 1        | 809  | 22 | 0.0169489 |
| 0.0306808 | 1        | 598  | 17 | 0.0469183 |
| 0.105232  | 1        | 895  | 16 | 0.0238343 |
| 0.0708235 | 1        | 602  | 15 | 0.0486926 |
| 0.0274387 | 1        | 870  | 20 | 0.0277802 |
| 0.0612059 | 1        | 538  | 11 | 0.0316026 |
| 0.0870588 | 1        | 740  | 21 | 0.0331915 |
| 0.114588  | 1        | 974  | 21 | 0.0315231 |
| 0.0716049 | 1        | 609  | 13 | 0.0385322 |
| 0.0588858 | 1        | 501  | 10 | 0.0441465 |

|           |   |      |    |           |
|-----------|---|------|----|-----------|
| 0.05945   | 1 | 575  | 16 | 0.0486308 |
| 0.0715294 | 1 | 608  | 17 | 0.0156424 |
| 0.0815294 | 1 | 693  | 20 | 0.0458855 |
| 0.0709412 | 1 | 603  | 16 | 0.0473685 |
| 0.124941  | 1 | 1062 | 22 | 0.0277096 |
| 0.07      | 1 | 595  | 14 | 0.0420632 |
| 0.0750588 | 1 | 638  | 18 | 0.0350276 |
| 0.0549496 | 1 | 796  | 21 | 0.0314613 |
| 0.068     | 1 | 578  | 15 | 0.0323882 |
| 0.0694775 | 1 | 613  | 17 | 0.0472273 |
| 0.0319548 | 1 | 622  | 18 | 0.0441376 |
| 0.0839241 | 1 | 876  | 22 | 0.0350806 |
| 0.0867982 | 1 | 906  | 25 | 0.0213538 |
| 0.08      | 1 | 680  | 19 | 0.0353984 |
| 0.0735246 | 1 | 674  | 17 | 0.048984  |
| 0.0769412 | 1 | 654  | 19 | 0.0431136 |
| 0.113294  | 1 | 963  | 26 | 0.0327148 |
| 0.07      | 1 | 595  | 16 | 0.0433432 |
| 0.0905882 | 1 | 770  | 19 | 0.0152451 |
| 0.0704706 | 1 | 599  | 17 | 0.0435903 |
| 0.135373  | 1 | 1155 | 27 | 0.017046  |
| 0.140118  | 1 | 1191 | 33 | 0.0102223 |
| 0.0806205 | 1 | 686  | 19 | 0.0491782 |
| 0.0686571 | 1 | 591  | 17 | 0.0455677 |
| 0.0263842 | 1 | 650  | 16 | 0.0495401 |
| 0.128202  | 1 | 1091 | 29 | 0.0228809 |
| 0.0737647 | 1 | 627  | 17 | 0.0330238 |
| 0.0972941 | 1 | 827  | 23 | 0.0475627 |
| 0.0739317 | 1 | 827  | 23 | 0.0475627 |
| 0.036369  | 1 | 615  | 11 | 0.0151569 |
| 0.0661176 | 1 | 562  | 16 | 0.0306227 |
| 0.0881176 | 1 | 749  | 21 | 0.0234283 |
| 0.0704706 | 1 | 599  | 13 | 0.0495401 |
| 0.0887133 | 1 | 786  | 17 | 0.0234901 |
| 0.0956471 | 1 | 813  | 16 | 0.0237196 |
| 0.0690588 | 1 | 587  | 12 | 0.047907  |
| 0.044544  | 1 | 736  | 21 | 0.0419661 |
| 0.0408426 | 1 | 349  | 10 | 0.0474303 |
| 0.0948235 | 1 | 806  | 22 | 0.0231987 |
| 0.0794524 | 1 | 679  | 19 | 0.0469448 |
| 0.0867059 | 1 | 737  | 21 | 0.034754  |
| 0.0680598 | 1 | 596  | 16 | 0.0430077 |
| 0.0377514 | 1 | 595  | 17 | 0.0336947 |
| 0.0911765 | 1 | 775  | 19 | 0.0272506 |
| 0.0882353 | 1 | 750  | 18 | 0.0293162 |
| 0.0763529 | 1 | 649  | 18 | 0.032247  |
| 0.089846  | 1 | 776  | 21 | 0.0349394 |



|           |          |      |    |            |
|-----------|----------|------|----|------------|
| 0.0823887 | 1        | 705  | 14 | 0.0205946  |
| 0.0826107 | 1        | 705  | 14 | 0.0205946  |
| 0.113051  | 1        | 965  | 27 | 0.0258117  |
| 0.0703829 | 1        | 601  | 17 | 0.0339595  |
| 0.0303625 | 1        | 634  | 18 | 0.027127   |
| 0.062794  | 1        | 534  | 15 | 0.0485426  |
| 0.0521176 | 1        | 443  | 10 | 0.03772    |
| 0.0729412 | 1        | 620  | 11 | 0.0437227  |
| 0.068624  | 1        | 589  | 15 | 0.0479953  |
| 0.104571  | 1        | 890  | 20 | 0.0341625  |
| 0.0715362 | 1        | 617  | 14 | 0.0473685  |
| 0.0969775 | 1        | 831  | 22 | 0.0346039  |
| 0.130353  | 1        | 1108 | 28 | 0.00322205 |
| 0.0705882 | 1        | 600  | 14 | 0.0402977  |
| 0.0708235 | 1        | 602  | 13 | 0.0444466  |
| 0.170222  | 1        | 1500 | 42 | 0.0162162  |
| 0.0755294 | 1        | 642  | 12 | 0.0459738  |
| 0.0705882 | 1        | 600  | 12 | 0.0355308  |
| 0.109636  | 1        | 933  | 26 | 0.0260324  |
| 0.0863923 | 1        | 739  | 21 | 0.0291573  |
| 0.0974835 | 1        | 829  | 23 | 0.0209301  |
| 0.0735294 | 1        | 625  | 18 | 0.0471743  |
| 0.0797647 | 1        | 678  | 19 | 0.0291573  |
| 0.0708235 | 1        | 602  | 10 | 0.0439523  |
| 0.0760908 | 1        | 654  | 18 | 0.0411804  |
| 0.0752941 | 1        | 640  | 18 | 0.0455589  |
| 0.0702353 | 1        | 597  | 12 | 0.0482778  |
| 0.0791199 | 1        | 676  | 19 | 0.0467682  |
| 0.0758824 | 1        | 645  | 12 | 0.0357515  |
| 0.0934148 | 1        | 871  | 24 | 0.0219099  |
| 0.0774118 | 1        | 658  | 19 | 0.0302343  |
| 0.0774268 | 1        | 674  | 19 | 0.0321763  |
| 0.0359807 | 1        | 598  | 10 | 0.0352395  |
| 0.106487  | 1        | 916  | 18 | 0.0156512  |
| 0.0478279 | 1        | 589  | 11 | 0.0485955  |
| 0.0489107 | 1        | 669  | 19 | 0.0311259  |
| 0.0694623 | 1        | 593  | 17 | 0.0452587  |
| 0.072     | 1        | 612  | 13 | 0.0447026  |
| 0.0717047 | 1        | 612  | 13 | 0.0447026  |
| 0.0484734 | 1        | 716  | 20 | 0.0406155  |
| 0.078     | 1        | 663  | 18 | 0.0340566  |
| 0.0496759 | 1        | 636  | 11 | 0.0340919  |
| 0.0280606 | 0.389937 | 636  | 11 | 0.0340919  |
| 0.0485824 | 1        | 622  | 14 | 0.0411451  |
| 0.0703779 | 1        | 622  | 14 | 0.0411451  |
| 0.0466806 | 0.704319 | 602  | 14 | 0.0346216  |
| 0.0356087 | 1        | 602  | 14 | 0.0346216  |

|           |          |      |    |            |
|-----------|----------|------|----|------------|
| 0.104588  | 1        | 889  | 25 | 0.0212743  |
| 0.0794463 | 1        | 683  | 18 | 0.0347187  |
| 0.0735294 | 1        | 625  | 11 | 0.0371815  |
| 0.0508464 | 1        | 784  | 21 | 0.0277096  |
| 0.136665  | 1        | 1299 | 31 | 0.0230575  |
| 0.048454  | 1        | 771  | 22 | 0.0293339  |
| 0.0889954 | 1        | 761  | 22 | 0.0426899  |
| 0.079203  | 1        | 799  | 22 | 0.0341625  |
| 0.10002   | 1        | 1009 | 28 | 0.0234636  |
| 0.0818438 | 1        | 696  | 15 | 0.0212214  |
| 0.047379  | 1        | 780  | 21 | 0.0215303  |
| 0.0451339 | 1        | 595  | 17 | 0.049187   |
| 0.0874862 | 1        | 869  | 22 | 0.0351954  |
| 0.0632276 | 1        | 592  | 12 | 0.045912   |
| 0.0859111 | 1        | 736  | 20 | 0.0310906  |
| 0.0767693 | 1        | 653  | 14 | 0.0391677  |
| 0.0669851 | 1        | 575  | 16 | 0.0497166  |
| 0.247181  | 1        | 2126 | 49 | 0.0100192  |
| 0.0711067 | 1        | 852  | 23 | 0.0340743  |
| 0.0515784 | 1        | 665  | 19 | 0.0451705  |
| 0.0163724 | 0.210526 | 665  | 19 | 0.0451705  |
| 0.0266811 | 1        | 344  | 10 | 0.0489928  |
| 0.0402292 | 1        | 344  | 10 | 0.0489928  |
| 0.0767062 | 1        | 653  | 19 | 0.0486926  |
| 0.046762  | 1        | 595  | 17 | 0.0480041  |
| 0.0572034 | 1        | 621  | 17 | 0.0354072  |
| 0.0465663 | 1        | 396  | 12 | 0.042381   |
| 0.0724909 | 1        | 619  | 17 | 0.0460356  |
| 0.0688235 | 1        | 585  | 17 | 0.0476245  |
| 0.0724706 | 1        | 616  | 10 | 0.0396356  |
| 0.122396  | 1        | 1046 | 25 | 0.023084   |
| 0.0604066 | 1        | 514  | 10 | 0.0494783  |
| 0.109201  | 1        | 953  | 26 | 0.02206    |
| 0.0291608 | 1        | 827  | 18 | 0.0344274  |
| 0.037835  | 1        | 1073 | 30 | 0.0327413  |
| 0.100471  | 1        | 854  | 23 | 0.022625   |
| 0.134771  | 1        | 1150 | 27 | 0.0215303  |
| 0.105306  | 1        | 897  | 25 | 0.0159337  |
| 0.0701176 | 1        | 596  | 11 | 0.0434668  |
| 0.0407059 | 1        | 346  | 10 | 0.0488251  |
| 0.0863795 | 1        | 768  | 16 | 0.00457266 |
| 0.0433973 | 1        | 699  | 20 | 0.0375523  |
| 0.0415347 | 1        | 669  | 16 | 0.00672658 |
| 0.0826021 | 1        | 706  | 20 | 0.0406155  |
| 0.0882284 | 1        | 751  | 21 | 0.0200032  |
| 0.0875294 | 1        | 744  | 20 | 0.0299518  |
| 0.068742  | 1        | 594  | 11 | 0.0309758  |

|            |          |      |    |            |
|------------|----------|------|----|------------|
| 0.0721007  | 1        | 613  | 17 | 0.044067   |
| 0.0699095  | 1        | 595  | 17 | 0.0481012  |
| 0.0752941  | 1        | 640  | 17 | 0.034189   |
| 0.0974331  | 1        | 892  | 25 | 0.016684   |
| 0.0758427  | 1        | 648  | 13 | 0.0493282  |
| 0.0861176  | 1        | 732  | 21 | 0.0120408  |
| 0.0787872  | 1        | 673  | 13 | 0.0356279  |
| 0.0714363  | 1        | 661  | 19 | 0.0295899  |
| 0.127529   | 1        | 1084 | 30 | 0.0327678  |
| 0.0905008  | 1        | 806  | 23 | 0.0348511  |
| 0.0794118  | 1        | 675  | 14 | 0.0464858  |
| 0.0749094  | 1        | 641  | 18 | 0.0391413  |
| 0.0622353  | 1        | 529  | 15 | 0.0495313  |
| 0.0167059  | 0.229402 | 619  | 10 | 0.0423015  |
| 0.0728235  | 1        | 619  | 10 | 0.0423015  |
| 0.0672941  | 1        | 572  | 16 | 0.0435374  |
| 0.158838   | 1        | 1356 | 32 | 0.0311965  |
| 0.0528702  | 1        | 968  | 27 | 0.01551    |
| 0.108471   | 1        | 922  | 26 | 0.0315937  |
| 0.0573691  | 1        | 652  | 14 | 0.0261825  |
| 0.04       | 1        | 340  | 10 | 0.0400152  |
| 0.100046   | 1        | 878  | 19 | 0.0418248  |
| 0.0555229  | 1        | 472  | 14 | 0.0233135  |
| 0.111814   | 1        | 954  | 23 | 0.0167193  |
| 0.104111   | 1        | 889  | 23 | 0.0242669  |
| 0.113212   | 1        | 964  | 24 | 0.0293162  |
| 0.114353   | 1        | 972  | 24 | 0.0306315  |
| 0.066      | 1        | 561  | 15 | 0.043149   |
| 0.00668011 | 0.160768 | 989  | 24 | 0.0224396  |
| 0.056844   | 1        | 1353 | 36 | 0.0194382  |
| 0.0719282  | 1        | 617  | 14 | 0.0479776  |
| 0.088526   | 1        | 797  | 22 | 0.0409686  |
| 0.052826   | 1        | 472  | 14 | 0.0448262  |
| 0.0712927  | 1        | 637  | 11 | 0.0461944  |
| 0.0777973  | 1        | 664  | 18 | 0.0433432  |
| 0.0819672  | 1        | 705  | 19 | 0.0469801  |
| 0.0687702  | 1        | 935  | 27 | 0.0279656  |
| 0.068202   | 1        | 767  | 21 | 0.0344274  |
| 0.0959443  | 1        | 951  | 27 | 0.0466623  |
| 0.0951765  | 1        | 809  | 23 | 0.0324412  |
| 0.103059   | 1        | 876  | 21 | 0.0203121  |
| 0.0167059  | 0.316964 | 448  | 13 | 0.0482689  |
| 0.0822353  | 1        | 699  | 20 | 0.0470949  |
| 0.141093   | 1        | 1200 | 26 | 0.00790064 |
| 0.0770588  | 1        | 655  | 18 | 0.0464416  |
| 0.0702353  | 1        | 597  | 15 | 0.0431048  |
| 0.074922   | 1        | 792  | 22 | 0.0325648  |

|           |          |      |    |            |
|-----------|----------|------|----|------------|
| 0.0720856 | 1        | 1199 | 33 | 0.00813015 |
| 0.0914118 | 1        | 777  | 17 | 0.0128794  |
| 0.0650406 | 1        | 616  | 15 | 0.0448085  |
| 0.0765882 | 1        | 651  | 17 | 0.0386469  |
| 0.0814971 | 1        | 773  | 22 | 0.0272506  |
| 0.0825699 | 1        | 703  | 20 | 0.0495224  |
| 0.0698269 | 1        | 601  | 16 | 0.041507   |
| 0.0994598 | 1        | 847  | 24 | 0.0219099  |
| 0.0802353 | 1        | 682  | 19 | 0.0488692  |
| 0.100741  | 1        | 857  | 24 | 0.0436521  |
| 0.0689615 | 1        | 587  | 12 | 0.0455059  |
| 0.106     | 0.974054 | 925  | 51 | 0.0193499  |
| 0.0742727 | 1        | 651  | 14 | 0.0347628  |
| 0.0914022 | 1        | 792  | 22 | 0.0342155  |
| 0.06716   | 1        | 599  | 14 | 0.0422574  |
| 0.0823529 | 1        | 700  | 18 | 0.04796    |
| 0.0670588 | 1        | 570  | 16 | 0.0453823  |
| 0.0644024 | 0.961403 | 570  | 16 | 0.0453823  |
| 0.0444224 | 1        | 716  | 16 | 0.0350276  |
| 0.0803529 | 1        | 683  | 19 | 0.0465564  |
| 0.0733385 | 0.967789 | 683  | 19 | 0.0465564  |
| 0.0837641 | 1        | 713  | 15 | 0.0329532  |
| 0.113529  | 1        | 965  | 24 | 0.0232164  |
| 0.120014  | 1        | 1050 | 28 | 0.0215303  |
| 0.0744706 | 1        | 633  | 15 | 0.0323794  |
| 0.0996471 | 0.937984 | 903  | 26 | 0.0171519  |
| 0.0699342 | 1        | 595  | 15 | 0.0357868  |
| 0.0869463 | 1        | 740  | 21 | 0.0171519  |
| 0.0547248 | 1        | 677  | 19 | 0.039821   |
| 0.0708235 | 1        | 602  | 17 | 0.0498049  |
| 0.0353831 | 1        | 664  | 18 | 0.034445   |
| 0.0786635 | 1        | 671  | 19 | 0.0432284  |
| 0.116343  | 1        | 1023 | 29 | 0.0230663  |
| 0.0697647 | 1        | 593  | 11 | 0.0380731  |
| 0.0704887 | 1        | 600  | 17 | 0.0424251  |
| 0.0653266 | 1        | 598  | 17 | 0.0469448  |
| 0.0318404 | 1        | 878  | 22 | 0.0453735  |
| 0.0685601 | 1        | 589  | 17 | 0.0464593  |
| 0.0917852 | 1        | 781  | 22 | 0.0348069  |
| 0.0621584 | 1        | 762  | 22 | 0.0388146  |
| 0.0723131 | 1        | 619  | 17 | 0.0450557  |
| 0.0245293 | 1        | 611  | 17 | 0.041613   |
| 0.0859525 | 1        | 897  | 25 | 0.0286542  |
| 0.0584515 | 1        | 610  | 17 | 0.0385233  |
| 0.0628235 | 1        | 534  | 13 | 0.0455853  |
| 0.0339515 | 1        | 617  | 14 | 0.046371   |
| 0.0593928 | 1        | 669  | 13 | 0.0492223  |

|           |          |      |    |            |
|-----------|----------|------|----|------------|
| 0.0770498 | 1        | 655  | 11 | 0.0207359  |
| 0.125676  | 1        | 1069 | 30 | 0.015969   |
| 0.0812649 | 1        | 717  | 20 | 0.0424074  |
| 0.113988  | 1        | 1193 | 33 | 0.0216186  |
| 0.0813237 | 1        | 752  | 21 | 0.0483042  |
| 0.0780774 | 1        | 666  | 19 | 0.0329443  |
| 0.0672388 | 1        | 666  | 19 | 0.0329443  |
| 0.0697538 | 1        | 595  | 17 | 0.0251496  |
| 0.0600707 | 1        | 595  | 17 | 0.0251496  |
| 0.122449  | 1        | 1044 | 20 | 0.0237902  |
| 0.0721353 | 1        | 802  | 23 | 0.0269328  |
| 0.105176  | 1        | 894  | 26 | 0.0499903  |
| 0.0863529 | 1        | 734  | 15 | 0.0240462  |
| 0.0715294 | 1        | 608  | 16 | 0.0499462  |
| 0.101765  | 1        | 865  | 24 | 0.0234459  |
| 0.11      | 1        | 935  | 25 | 0.0225014  |
| 0.0756155 | 1        | 645  | 14 | 0.032141   |
| 0.07207   | 1        | 618  | 18 | 0.036952   |
| 0.0470093 | 1        | 569  | 16 | 0.0491517  |
| 0.0755294 | 1        | 642  | 18 | 0.0186879  |
| 0.100856  | 1        | 895  | 24 | 0.0308257  |
| 0.140588  | 1        | 1195 | 32 | 0.0163133  |
| 0.0682138 | 1        | 582  | 14 | 0.04811    |
| 0.076     | 1        | 646  | 11 | 0.0322558  |
| 0.0829412 | 1        | 705  | 16 | 0.0406331  |
| 0.0698824 | 1        | 594  | 14 | 0.0419749  |
| 0.11332   | 1        | 969  | 28 | 0.0478275  |
| 0.0887059 | 1        | 754  | 20 | 0.0454971  |
| 0.0756865 | 1        | 645  | 17 | 0.0435462  |
| 0.112023  | 1        | 969  | 21 | 0.040995   |
| 0.0505631 | 1        | 642  | 18 | 0.0499197  |
| 0.0858824 | 1        | 730  | 21 | 0.0333328  |
| 0.0699038 | 1        | 596  | 17 | 0.0499108  |
| 0.10154   | 1        | 1108 | 31 | 0.0130736  |
| 0.13062   | 1        | 1136 | 29 | 0.0196148  |
| 0.0729412 | 1        | 620  | 18 | 0.0288307  |
| 0.068925  | 1        | 586  | 17 | 0.042328   |
| 0.0772264 | 1        | 705  | 20 | 0.0332886  |
| 0.0765692 | 1        | 699  | 19 | 0.0341537  |
| 0.0744706 | 0.99061  | 639  | 18 | 0.0228103  |
| 0.0570892 | 1        | 486  | 14 | 0.0497078  |
| 0.126588  | 0.934839 | 1151 | 27 | 0.00331915 |
| 0.0790588 | 1        | 672  | 18 | 0.0352042  |
| 0.0722268 | 1        | 614  | 12 | 0.0454441  |
| 0.0771765 | 1        | 656  | 12 | 0.0474126  |
| 0.0878824 | 1        | 747  | 21 | 0.0434138  |
| 0.0921008 | 1        | 808  | 22 | 0.0319115  |

|           |          |      |    |           |
|-----------|----------|------|----|-----------|
| 0.0794447 | 1        | 681  | 17 | 0.0316908 |
| 0.0691765 | 1        | 588  | 13 | 0.0470949 |
| 0.111412  | 1        | 947  | 23 | 0.0324853 |
| 0.0787059 | 1        | 669  | 12 | 0.0135061 |
| 0.068138  | 1        | 883  | 23 | 0.0413658 |
| 0.0804706 | 1        | 684  | 16 | 0.0301019 |
| 0.0738888 | 1        | 635  | 16 | 0.0219187 |
| 0.0991544 | 1        | 856  | 22 | 0.0391236 |
| 0.0882353 | 1        | 750  | 21 | 0.0308522 |
| 0.0708235 | 1        | 602  | 17 | 0.044323  |
| 0.0388235 | 1        | 330  | 10 | 0.0444466 |
| 0.0697647 | 1        | 593  | 17 | 0.0416571 |
| 0.0858824 | 1        | 730  | 16 | 0.0327148 |
| 0.0580918 | 1        | 495  | 14 | 0.0497519 |
| 0.081948  | 1        | 700  | 20 | 0.049134  |
| 0.0405263 | 1        | 345  | 10 | 0.0499197 |
| 0.119882  | 1        | 1019 | 21 | 0.018785  |
| 0.0713196 | 1        | 608  | 17 | 0.0481542 |
| 0.0941273 | 1        | 803  | 22 | 0.0162956 |
| 0.0989602 | 1        | 847  | 18 | 0.0334652 |
| 0.0581246 | 1        | 499  | 13 | 0.0468565 |
| 0.0862534 | 1        | 736  | 20 | 0.0421161 |
| 0.0530588 | 1        | 451  | 13 | 0.0145743 |
| 0.0797381 | 1        | 682  | 20 | 0.0485867 |
| 0.0850618 | 1        | 730  | 15 | 0.034754  |
| 0.0797416 | 1        | 679  | 19 | 0.0356456 |
| 0.0701033 | 1        | 597  | 15 | 0.0424339 |
| 0.0108235 | 0.101996 | 902  | 25 | 0.014892  |
| 0.0823529 | 1        | 700  | 20 | 0.0479246 |
| 0.0949471 | 1        | 808  | 23 | 0.0242845 |
| 0.09737   | 1        | 833  | 17 | 0.0089158 |
| 0.0751283 | 1        | 644  | 18 | 0.0482866 |
| 0.0693354 | 1        | 1157 | 29 | 0.0315672 |
| 0.067435  | 1        | 591  | 14 | 0.0427429 |
| 0.071106  | 1        | 614  | 15 | 0.0424074 |
| 0.0753787 | 1        | 642  | 18 | 0.0390618 |
| 0.0898876 | 1        | 768  | 22 | 0.0422397 |
| 0.0990588 | 1        | 842  | 24 | 0.021345  |
| 0.0735124 | 1        | 635  | 17 | 0.0431578 |
| 0.1       | 1        | 850  | 24 | 0.0343744 |
| 0.0651368 | 1        | 914  | 20 | 0.0356456 |
| 0.0581176 | 1        | 494  | 12 | 0.0464681 |
| 0.10207   | 1        | 868  | 23 | 0.0415423 |
| 0.0835196 | 1        | 710  | 19 | 0.0434668 |
| 0.0752944 | 1        | 697  | 17 | 0.0305168 |
| 0.0950632 | 1        | 880  | 20 | 0.0152893 |
| 0.0642353 | 1        | 546  | 15 | 0.0477658 |

|           |   |      |    |           |
|-----------|---|------|----|-----------|
| 0.0781076 | 1 | 700  | 19 | 0.04668   |
| 0.0713616 | 1 | 609  | 13 | 0.04668   |
| 0.0792941 | 1 | 674  | 19 | 0.0249819 |
| 0.0877647 | 1 | 746  | 18 | 0.0222542 |
| 0.035787  | 1 | 791  | 23 | 0.0311788 |
| 0.05857   | 1 | 598  | 17 | 0.03373   |
| 0.10187   | 1 | 866  | 22 | 0.0351159 |
| 0.101882  | 1 | 866  | 22 | 0.0351159 |
| 0.0650267 | 1 | 645  | 18 | 0.0306315 |
| 0.0761176 | 1 | 647  | 18 | 0.0355308 |
| 0.0822353 | 1 | 699  | 19 | 0.0403595 |
| 0.0549048 | 1 | 914  | 22 | 0.0160749 |
| 0.113529  | 1 | 965  | 24 | 0.0452587 |
| 0.059533  | 1 | 538  | 15 | 0.04668   |
| 0.100995  | 1 | 883  | 25 | 0.0170813 |
| 0.0528235 | 1 | 449  | 13 | 0.035778  |
| 0.102235  | 1 | 869  | 20 | 0.0284688 |
| 0.078     | 1 | 663  | 19 | 0.0410657 |
| 0.0824815 | 1 | 702  | 20 | 0.0235695 |
| 0.104398  | 1 | 895  | 19 | 0.0478364 |
| 0.0708235 | 1 | 602  | 14 | 0.0479511 |
| 0.0722906 | 1 | 617  | 12 | 0.0389912 |
| 0.0751056 | 1 | 658  | 18 | 0.0451087 |
| 0.0330186 | 1 | 598  | 16 | 0.046627  |
| 0.0615294 | 1 | 523  | 13 | 0.0326972 |
| 0.0705882 | 1 | 600  | 11 | 0.046371  |
| 0.0865882 | 1 | 736  | 19 | 0.0161455 |
| 0.0419247 | 1 | 907  | 26 | 0.0311788 |
| 0.0493205 | 1 | 1067 | 27 | 0.0164898 |
| 0.0497827 | 1 | 1077 | 26 | 0.0221218 |
| 0.0626329 | 1 | 1355 | 39 | 0.0243022 |
| 0.0451142 | 1 | 976  | 21 | 0.0242669 |
| 0.0875294 | 1 | 744  | 21 | 0.03245   |
| 0.0802577 | 1 | 735  | 21 | 0.0429106 |
| 0.0573269 | 1 | 525  | 14 | 0.0312141 |
| 0.0440628 | 1 | 685  | 16 | 0.0395826 |
| 0.0827059 | 1 | 703  | 18 | 0.0469713 |
| 0.0714118 | 1 | 607  | 17 | 0.0423103 |
| 0.0529412 | 1 | 450  | 13 | 0.0440935 |
| 0.0402822 | 1 | 354  | 10 | 0.0425487 |
| 0.0718985 | 1 | 612  | 17 | 0.0331915 |
| 0.102471  | 1 | 871  | 23 | 0.0129676 |
| 0.0530633 | 1 | 634  | 18 | 0.0450292 |
| 0.0744219 | 1 | 634  | 18 | 0.0450292 |
| 0.0748235 | 1 | 636  | 18 | 0.0345333 |
| 0.0916955 | 1 | 901  | 26 | 0.0411098 |
| 0.0813094 | 1 | 693  | 17 | 0.0350629 |

|           |          |      |    |           |
|-----------|----------|------|----|-----------|
| 0.0815102 | 1        | 693  | 17 | 0.0350629 |
| 0.0478419 | 1        | 409  | 12 | 0.0481012 |
| 0.0727551 | 1        | 619  | 16 | 0.0495401 |
| 0.0714948 | 1        | 617  | 17 | 0.0457443 |
| 0.0725882 | 1        | 617  | 17 | 0.0457443 |
| 0.0822911 | 1        | 704  | 18 | 0.0406772 |
| 0.0562602 | 1        | 723  | 20 | 0.0211155 |
| 0.0740306 | 1        | 630  | 17 | 0.0351954 |
| 0.104471  | 1        | 888  | 24 | 0.0161544 |
| 0.0829274 | 1        | 715  | 20 | 0.0282128 |
| 0.0562009 | 1        | 479  | 10 | 0.0498137 |
| 0.091757  | 1        | 787  | 16 | 0.0229251 |
| 0.114947  | 1        | 979  | 25 | 0.0276831 |
| 0.113903  | 1        | 979  | 25 | 0.0276831 |
| 0.0387578 | 1        | 639  | 18 | 0.0452941 |
| 0.0755028 | 1        | 642  | 18 | 0.0468742 |
| 0.0892983 | 1        | 761  | 20 | 0.0305168 |
| 0.123059  | 1        | 1046 | 27 | 0.019703  |
| 0.0703529 | 1        | 598  | 11 | 0.0458325 |
| 0.0852941 | 1        | 725  | 21 | 0.0184407 |
| 0.0902794 | 1        | 769  | 21 | 0.0331121 |
| 0.0686794 | 1        | 596  | 17 | 0.0484984 |
| 0.0295294 | 0.421141 | 596  | 17 | 0.0484984 |
| 0.0695012 | 1        | 595  | 14 | 0.0384262 |
| 0.08089   | 1        | 698  | 20 | 0.0475098 |
| 0.0486459 | 1        | 679  | 14 | 0.0331827 |
| 0.0702353 | 1        | 597  | 16 | 0.0419396 |
| 0.07      | 1        | 595  | 14 | 0.020268  |
| 0.03531   | 1        | 627  | 18 | 0.0469713 |
| 0.0725947 | 1        | 627  | 18 | 0.0469713 |
| 0.10903   | 1        | 949  | 17 | 0.0157306 |
| 0.0726426 | 1        | 671  | 18 | 0.0476157 |
| 0.106588  | 1        | 906  | 25 | 0.0107343 |
| 0.0444844 | 0.548476 | 722  | 21 | 0.0336947 |
| 0.0775294 | 1        | 659  | 19 | 0.0347275 |
| 0.133294  | 1        | 1133 | 26 | 0.0127558 |
| 0.122756  | 1        | 1046 | 25 | 0.012694  |
| 0.0402353 | 1        | 342  | 10 | 0.0461591 |
| 0.0737003 | 1        | 628  | 17 | 0.0437051 |
| 0.0729412 | 1        | 620  | 17 | 0.0445261 |
| 0.0380576 | 1        | 616  | 13 | 0.0487633 |
| 0.0723854 | 1        | 616  | 13 | 0.0487633 |
| 0.0879069 | 1        | 748  | 19 | 0.0491782 |
| 0.0614256 | 1        | 779  | 17 | 0.0203033 |
| 0.0723529 | 1        | 615  | 10 | 0.0431048 |
| 0.0884706 | 1        | 752  | 21 | 0.0465829 |
| 0.113059  | 1        | 961  | 22 | 0.0243728 |



|           |   |      |    |            |
|-----------|---|------|----|------------|
| 0.105176  | 1 | 894  | 25 | 0.00354867 |
| 0.0688532 | 1 | 592  | 16 | 0.0487456  |
| 0.108824  | 1 | 925  | 24 | 0.0434579  |
| 0.0572968 | 1 | 638  | 17 | 0.044173   |
| 0.066996  | 1 | 746  | 21 | 0.0314613  |
| 0.0709412 | 1 | 603  | 16 | 0.0377465  |
| 0.127951  | 1 | 1111 | 29 | 0.0354072  |
| 0.0728235 | 1 | 619  | 17 | 0.0200297  |
| 0.065098  | 1 | 996  | 27 | 0.0237019  |
| 0.0945882 | 1 | 804  | 21 | 0.0118907  |
| 0.07      | 1 | 595  | 17 | 0.0438463  |
| 0.0515294 | 1 | 438  | 10 | 0.0498226  |
| 0.052453  | 1 | 634  | 18 | 0.0480394  |
| 0.0654566 | 1 | 577  | 14 | 0.0441465  |
| 0.08064   | 1 | 751  | 19 | 0.0244964  |
| 0.0627059 | 1 | 533  | 15 | 0.0496195  |
| 0.0918824 | 1 | 781  | 22 | 0.0346834  |
| 0.073488  | 1 | 627  | 14 | 0.030455   |
| 0.191259  | 1 | 1628 | 43 | 0.0226426  |
| 0.0375834 | 1 | 586  | 11 | 0.0489133  |
| 0.0687309 | 1 | 586  | 11 | 0.0489133  |
| 0.0828235 | 1 | 704  | 19 | 0.0467682  |
| 0.050595  | 1 | 1080 | 30 | 0.0245405  |
| 0.105934  | 1 | 1080 | 30 | 0.0245405  |
| 0.0735294 | 1 | 625  | 16 | 0.0499197  |
| 0.0904706 | 1 | 769  | 22 | 0.0271005  |
| 0.0764706 | 1 | 650  | 14 | 0.0454441  |
| 0.0808235 | 1 | 687  | 19 | 0.0403153  |
| 0.102     | 1 | 867  | 23 | 0.0497608  |
| 0.0711637 | 1 | 614  | 10 | 0.0436609  |
| 0.0716471 | 1 | 609  | 17 | 0.0393973  |
| 0.0406667 | 1 | 649  | 18 | 0.0339065  |
| 0.0728314 | 1 | 623  | 12 | 0.0196766  |
| 0.0799953 | 1 | 687  | 14 | 0.0488515  |
| 0.0931532 | 1 | 800  | 22 | 0.0325559  |
| 0.0496519 | 1 | 649  | 13 | 0.0234283  |
| 0.0804706 | 1 | 684  | 19 | 0.03245    |
| 0.0737647 | 1 | 627  | 17 | 0.0384351  |
| 0.0924706 | 1 | 786  | 21 | 0.0227485  |
| 0.0725541 | 1 | 617  | 13 | 0.049699   |
| 0.0996002 | 1 | 847  | 24 | 0.0285482  |
| 0.0964336 | 1 | 822  | 22 | 0.0327237  |
| 0.0652941 | 1 | 555  | 10 | 0.0497961  |
| 0.148941  | 1 | 1266 | 33 | 0.0166664  |
| 0.0711727 | 1 | 616  | 14 | 0.0455147  |
| 0.0362147 | 1 | 535  | 15 | 0.0474833  |
| 0.0467068 | 1 | 690  | 20 | 0.0385057  |

|           |          |      |    |           |
|-----------|----------|------|----|-----------|
| 0.0429045 | 1        | 595  | 17 | 0.049134  |
| 0.0662583 | 1        | 595  | 17 | 0.049134  |
| 0.04651   | 1        | 645  | 19 | 0.0210183 |
| 0.0653675 | 0.910078 | 645  | 19 | 0.0210183 |
| 0.0486144 | 1        | 414  | 12 | 0.0489751 |
| 0.118062  | 1        | 1138 | 31 | 0.0166399 |
| 0.0373459 | 1        | 506  | 14 | 0.0498844 |
| 0.0938824 | 1        | 798  | 23 | 0.0344627 |
| 0.0747532 | 1        | 636  | 18 | 0.0343656 |
| 0.0698741 | 1        | 594  | 13 | 0.0324588 |
| 0.0711852 | 1        | 606  | 15 | 0.0241256 |
| 0.111268  | 1        | 948  | 24 | 0.0422662 |
| 0.0701011 | 1        | 596  | 14 | 0.0224749 |
| 0.0874118 | 1        | 743  | 16 | 0.0424074 |
| 0.120824  | 1        | 1027 | 28 | 0.0349305 |
| 0.119659  | 1        | 1025 | 29 | 0.0140711 |
| 0.0524915 | 1        | 868  | 24 | 0.0330503 |
| 0.0916471 | 1        | 779  | 22 | 0.0286542 |
| 0.0328732 | 1        | 593  | 16 | 0.0480482 |
| 0.0364765 | 1        | 658  | 17 | 0.0466005 |
| 0.0971031 | 1        | 838  | 17 | 0.0314613 |
| 0.0732329 | 1        | 632  | 15 | 0.0372963 |
| 0.0276472 | 1        | 500  | 14 | 0.0425222 |
| 0.0714118 | 1        | 607  | 17 | 0.0466358 |
| 0.0406984 | 1        | 683  | 17 | 0.0314878 |
| 0.0724842 | 1        | 618  | 16 | 0.034904  |
| 0.0149977 | 0.190337 | 683  | 20 | 0.0453735 |
| 0.072     | 1        | 612  | 14 | 0.0430077 |
| 0.0708182 | 1        | 605  | 10 | 0.0448703 |
| 0.100824  | 1        | 857  | 21 | 0.0338712 |
| 0.134453  | 1        | 1177 | 33 | 0.017302  |
| 0.0922353 | 1        | 784  | 18 | 0.0344097 |
| 0.0742857 | 1        | 637  | 18 | 0.0409774 |
| 0.0699177 | 1        | 595  | 17 | 0.0383468 |
| 0.0582524 | 0.907563 | 595  | 17 | 0.0383468 |
| 0.0282925 | 1        | 600  | 11 | 0.0420808 |
| 0.0562114 | 1        | 600  | 11 | 0.0420808 |
| 0.0723529 | 1        | 615  | 16 | 0.0392207 |
| 0.0400846 | 1        | 341  | 10 | 0.049646  |
| 0.0361678 | 1        | 601  | 17 | 0.0491164 |
| 0.0990588 | 1        | 842  | 23 | 0.0351071 |
| 0.0929038 | 1        | 796  | 22 | 0.0452499 |
| 0.0289012 | 1        | 343  | 10 | 0.0422397 |
| 0.069613  | 1        | 608  | 16 | 0.045144  |
| 0.0910588 | 1        | 774  | 22 | 0.049496  |
| 0.109931  | 1        | 942  | 20 | 0.0213538 |
| 0.071571  | 1        | 610  | 14 | 0.0459914 |

|           |   |      |    |            |
|-----------|---|------|----|------------|
| 0.049748  | 1 | 681  | 14 | 0.0324147  |
| 0.0764706 | 1 | 650  | 18 | 0.0390088  |
| 0.0292098 | 1 | 353  | 10 | 0.0497519  |
| 0.100235  | 1 | 852  | 23 | 0.0232164  |
| 0.0788109 | 1 | 684  | 17 | 0.0344803  |
| 0.0775549 | 1 | 661  | 19 | 0.0466535  |
| 0.0698141 | 1 | 661  | 19 | 0.0466535  |
| 0.104421  | 1 | 888  | 25 | 0.0480482  |
| 0.128332  | 1 | 1093 | 29 | 0.0128705  |
| 0.0811765 | 1 | 690  | 19 | 0.0333945  |
| 0.079102  | 1 | 673  | 19 | 0.020833   |
| 0.071194  | 1 | 607  | 14 | 0.029581   |
| 0.0700687 | 1 | 979  | 25 | 0.0310464  |
| 0.0900129 | 1 | 767  | 37 | 0.0499197  |
| 0.0976471 | 1 | 830  | 15 | 0.0177698  |
| 0.0781176 | 1 | 664  | 13 | 0.026818   |
| 0.07155   | 1 | 1010 | 28 | 0.0196589  |
| 0.122353  | 1 | 1040 | 29 | 0.0214509  |
| 0.0797647 | 1 | 678  | 19 | 0.037314   |
| 0.138055  | 1 | 1187 | 32 | 0.00809484 |
| 0.0899061 | 1 | 766  | 21 | 0.0405095  |
| 0.140235  | 1 | 1192 | 23 | 0.00693844 |
| 0.0573415 | 1 | 635  | 15 | 0.0353013  |
| 0.0558967 | 1 | 619  | 17 | 0.0489045  |
| 0.0728924 | 1 | 626  | 13 | 0.0350012  |
| 0.0709077 | 1 | 632  | 17 | 0.0423898  |
| 0.0724417 | 1 | 1093 | 25 | 0.0162162  |
| 0.0273772 | 1 | 617  | 17 | 0.0461944  |
| 0.0506614 | 1 | 540  | 15 | 0.0472184  |
| 0.14884   | 1 | 1290 | 24 | 0.0130118  |
| 0.0732954 | 1 | 631  | 17 | 0.0341978  |
| 0.0728049 | 1 | 631  | 17 | 0.0341978  |
| 0.0488849 | 1 | 434  | 12 | 0.0396179  |
| 0.0857411 | 1 | 730  | 20 | 0.0314172  |
| 0.0729412 | 1 | 620  | 13 | 0.0497519  |
| 0.0982353 | 1 | 835  | 23 | 0.0488251  |
| 0.0729412 | 1 | 620  | 15 | 0.0431048  |
| 0.0817323 | 1 | 1038 | 28 | 0.0313642  |
| 0.0692524 | 1 | 591  | 16 | 0.0493989  |
| 0.0881176 | 1 | 749  | 18 | 0.0223778  |
| 0.0668235 | 1 | 568  | 16 | 0.0496107  |
| 0.119765  | 1 | 1018 | 27 | 0.0242316  |
| 0.0704195 | 1 | 643  | 18 | 0.0445525  |
| 0.0912941 | 1 | 776  | 20 | 0.0422927  |
| 0.0734118 | 1 | 624  | 16 | 0.0263149  |
| 0.0884706 | 1 | 752  | 19 | 0.0230398  |
| 0.03938   | 1 | 658  | 13 | 0.0360428  |

|           |   |      |    |           |
|-----------|---|------|----|-----------|
| 0.0788235 | 1 | 670  | 14 | 0.0287248 |
| 0.0528246 | 1 | 461  | 13 | 0.0231987 |
| 0.0369363 | 1 | 584  | 14 | 0.0481012 |
| 0.0682961 | 1 | 584  | 14 | 0.0481012 |
| 0.120729  | 1 | 1060 | 27 | 0.0215127 |
| 0.0701775 | 1 | 597  | 13 | 0.0455147 |
| 0.0990588 | 1 | 842  | 24 | 0.0239138 |
| 0.0400598 | 1 | 616  | 17 | 0.0452587 |
| 0.0625924 | 1 | 974  | 28 | 0.0322646 |
| 0.0492155 | 1 | 436  | 12 | 0.0491782 |
| 0.100706  | 1 | 856  | 16 | 0.0179817 |
| 0.0761176 | 1 | 647  | 18 | 0.0495489 |
| 0.118144  | 1 | 1006 | 25 | 0.0226603 |
| 0.0690546 | 1 | 588  | 10 | 0.0462916 |
| 0.0859494 | 1 | 731  | 15 | 0.0326707 |
| 0.0379118 | 1 | 618  | 15 | 0.047395  |
| 0.0732935 | 1 | 626  | 14 | 0.0420808 |
| 0.109412  | 1 | 930  | 25 | 0.0212214 |
| 0.0697647 | 1 | 593  | 17 | 0.0439787 |
| 0.0526808 | 1 | 451  | 25 | 0.015969  |
| 0.0963529 | 1 | 819  | 23 | 0.0328914 |
| 0.0996358 | 1 | 848  | 24 | 0.0207712 |
| 0.0692941 | 1 | 589  | 17 | 0.0468565 |
| 0.0602296 | 1 | 640  | 18 | 0.0483925 |
| 0.0747053 | 1 | 640  | 18 | 0.0483925 |
| 0.0724706 | 1 | 616  | 16 | 0.049187  |
| 0.056041  | 1 | 590  | 17 | 0.046371  |
| 0.0747059 | 1 | 635  | 18 | 0.0475186 |
| 0.108588  | 1 | 923  | 23 | 0.0108314 |
| 0.0854118 | 1 | 726  | 18 | 0.0464593 |
| 0.0754118 | 1 | 641  | 18 | 0.0272506 |
| 0.0831765 | 1 | 707  | 20 | 0.0473332 |
| 0.0860943 | 1 | 738  | 21 | 0.0463975 |
| 0.0657647 | 1 | 559  | 16 | 0.0492929 |
| 0.119176  | 1 | 1013 | 18 | 0.0170813 |
| 0.0914118 | 1 | 777  | 22 | 0.0350453 |
| 0.081555  | 1 | 814  | 18 | 0.0237461 |
| 0.131484  | 1 | 1166 | 31 | 0.017558  |
| 0.0772823 | 1 | 662  | 15 | 0.0492223 |
| 0.0599264 | 1 | 521  | 13 | 0.0466005 |
| 0.129529  | 1 | 1101 | 31 | 0.0125086 |
| 0.0290199 | 1 | 453  | 13 | 0.0461415 |
| 0.0724706 | 1 | 616  | 11 | 0.0370491 |
| 0.0230694 | 1 | 659  | 14 | 0.0466358 |
| 0.0607758 | 1 | 857  | 19 | 0.0434579 |
| 0.101647  | 1 | 864  | 22 | 0.0262442 |
| 0.0824512 | 1 | 701  | 38 | 0.031938  |

|            |          |      |    |            |
|------------|----------|------|----|------------|
| 0.0496706  | 1        | 656  | 19 | 0.0468742  |
| 0.0459605  | 1        | 607  | 17 | 0.0419219  |
| 0.0752839  | 1        | 643  | 14 | 0.0497431  |
| 0.0925882  | 1        | 787  | 44 | 0.0345245  |
| 0.113294   | 1        | 963  | 27 | 0.0245229  |
| 0.0989412  | 1        | 841  | 24 | 0.0277979  |
| 0.0782353  | 1        | 665  | 15 | 0.046062   |
| 0.0767059  | 1        | 652  | 17 | 0.0406066  |
| 0.149294   | 1        | 1269 | 36 | 0.00313377 |
| 0.0642293  | 1        | 643  | 16 | 0.0357162  |
| 0.0692239  | 1        | 693  | 15 | 0.0233135  |
| 0.0723529  | 1        | 615  | 17 | 0.0374817  |
| 0.130749   | 1        | 1120 | 31 | 0.012438   |
| 0.0918749  | 1        | 787  | 22 | 0.0434579  |
| 0.0910588  | 1        | 774  | 15 | 0.0347275  |
| 0.0596568  | 1        | 598  | 15 | 0.0420367  |
| 0.00799771 | 0.140468 | 598  | 15 | 0.0420367  |
| 0.0534209  | 1        | 862  | 22 | 0.0355838  |
| 0.0654437  | 1        | 1056 | 24 | 0.0351689  |
| 0.0726015  | 1        | 619  | 12 | 0.0429371  |
| 0.0457581  | 1        | 603  | 17 | 0.0302961  |
| 0.0398215  | 1        | 571  | 14 | 0.0449498  |
| 0.0747059  | 1        | 635  | 17 | 0.0439611  |
| 0.0709412  | 1        | 603  | 17 | 0.0472979  |
| 0.116219   | 1        | 991  | 27 | 0.0347716  |
| 0.0721048  | 1        | 815  | 13 | 0.048419   |
| 0.0709677  | 1        | 605  | 16 | 0.0480306  |
| 0.0853815  | 1        | 733  | 21 | 0.0464769  |
| 0.0856471  | 1        | 728  | 21 | 0.0325118  |
| 0.124194   | 1        | 1060 | 29 | 0.0321587  |
| 0.0718992  | 1        | 622  | 17 | 0.0485161  |
| 0.0660745  | 1        | 610  | 17 | 0.049902   |
| 0.0609594  | 1        | 596  | 14 | 0.0477834  |
| 0.0694657  | 1        | 680  | 18 | 0.0307463  |
| 0.0292518  | 1        | 624  | 18 | 0.0277008  |
| 0.0954118  | 1        | 811  | 23 | 0.0123585  |
| 0.0362127  | 1        | 615  | 14 | 0.0466535  |
| 0.068844   | 1        | 586  | 16 | 0.0416836  |
| 0.0613386  | 1        | 812  | 22 | 0.0351071  |
| 0.0695294  | 1        | 591  | 14 | 0.0447909  |
| 0.0495475  | 1        | 991  | 28 | 0.0478982  |
| 0.0818192  | 1        | 698  | 18 | 0.0469713  |
| 0.0882249  | 1        | 750  | 16 | 0.0485955  |
| 0.0724706  | 1        | 616  | 17 | 0.0339242  |
| 0.0624738  | 1        | 595  | 16 | 0.0477304  |
| 0.071185   | 1        | 668  | 13 | 0.0302343  |
| 0.0569684  | 1        | 569  | 16 | 0.0445614  |

|           |          |      |    |            |
|-----------|----------|------|----|------------|
| 0.082     | 1        | 697  | 17 | 0.0351689  |
| 0.0963572 | 1        | 820  | 17 | 0.0437227  |
| 0.107654  | 1        | 1007 | 27 | 0.0218216  |
| 0.0729944 | 0.990798 | 652  | 18 | 0.0277979  |
| 0.0925882 | 1        | 787  | 23 | 0.0345068  |
| 0.0523112 | 1        | 636  | 13 | 0.0399799  |
| 0.0724706 | 1        | 616  | 12 | 0.045144   |
| 0.129882  | 1        | 1104 | 30 | 0.0126322  |
| 0.0969412 | 1        | 824  | 23 | 0.0395826  |
| 0.118471  | 1        | 1007 | 20 | 0.0229516  |
| 0.0237631 | 1        | 658  | 14 | 0.0450204  |
| 0.108118  | 1        | 919  | 26 | 0.0163133  |
| 0.0883888 | 1        | 762  | 16 | 0.0425222  |
| 0.0569412 | 1        | 484  | 11 | 0.0473509  |
| 0.0984257 | 1        | 844  | 23 | 0.0316555  |
| 0.0731415 | 1        | 671  | 19 | 0.0403859  |
| 0.096     | 1        | 816  | 20 | 0.0329708  |
| 0.0710588 | 1        | 604  | 11 | 0.0401652  |
| 0.0776471 | 1        | 660  | 18 | 0.00770643 |
| 0.0735708 | 1        | 628  | 13 | 0.0455589  |
| 0.0850316 | 1        | 726  | 18 | 0.0405537  |
| 0.111529  | 1        | 948  | 22 | 0.0230045  |
| 0.106677  | 1        | 1569 | 44 | 0.0231723  |
| 0.0734899 | 1        | 629  | 18 | 0.0477569  |
| 0.074     | 1        | 629  | 18 | 0.0477569  |
| 0.0979616 | 1        | 841  | 22 | 0.0487456  |
| 0.0376853 | 1        | 506  | 11 | 0.0359722  |
| 0.136118  | 1        | 1157 | 32 | 0.0159513  |
| 0.107176  | 1        | 911  | 26 | 0.0294663  |
| 0.0705882 | 1        | 600  | 17 | 0.0499197  |
| 0.0642353 | 1        | 546  | 11 | 0.0488339  |
| 0.112353  | 1        | 955  | 24 | 0.0290955  |
| 0.0870588 | 0.91358  | 810  | 22 | 0.0497255  |
| 0.0725882 | 1        | 617  | 18 | 0.0489575  |
| 0.0752161 | 1        | 644  | 17 | 0.0430077  |
| 0.0834118 | 1        | 709  | 19 | 0.0496284  |
| 0.0452261 | 1        | 468  | 13 | 0.0319998  |
| 0.0731765 | 1        | 622  | 15 | 0.0326972  |
| 0.0826746 | 1        | 753  | 18 | 0.0284953  |
| 0.0716376 | 1        | 612  | 17 | 0.039459   |
| 0.0888733 | 1        | 758  | 20 | 0.0494077  |
| 0.0494159 | 1        | 423  | 12 | 0.0237196  |
| 0.112833  | 1        | 961  | 27 | 0.0453735  |
| 0.0691131 | 1        | 646  | 13 | 0.0475362  |
| 0.0754939 | 1        | 642  | 13 | 0.0338447  |
| 0.0514991 | 1        | 438  | 10 | 0.0481983  |
| 0.0463615 | 1        | 395  | 10 | 0.0489486  |

|           |          |      |    |            |
|-----------|----------|------|----|------------|
| 0.0984706 | 1        | 837  | 21 | 0.0356279  |
| 0.0441513 | 1        | 636  | 18 | 0.0327678  |
| 0.0765882 | 1        | 651  | 12 | 0.0169665  |
| 0.0252363 | 1        | 598  | 17 | 0.0480217  |
| 0.0711765 | 1        | 605  | 17 | 0.0406861  |
| 0.0929412 | 1        | 790  | 14 | 0.0310906  |
| 0.0693221 | 1        | 590  | 10 | 0.0476245  |
| 0.0968431 | 1        | 1178 | 33 | 0.00692078 |
| 0.0541763 | 1        | 659  | 19 | 0.0326707  |
| 0.0820712 | 1        | 699  | 18 | 0.0489575  |
| 0.0703529 | 1        | 598  | 17 | 0.0499197  |
| 0.0826997 | 1        | 707  | 20 | 0.0149009  |
| 0.116929  | 1        | 1016 | 28 | 0.0296428  |
| 0.120183  | 1        | 1023 | 29 | 0.0347187  |
| 0.0752676 | 1        | 654  | 19 | 0.0468124  |
| 0.0707059 | 1        | 601  | 16 | 0.0497961  |
| 0.0855814 | 1        | 736  | 21 | 0.0328119  |
| 0.0909412 | 1        | 773  | 18 | 0.0411098  |
| 0.102127  | 1        | 869  | 23 | 0.0240727  |
| 0.0441176 | 0.578704 | 648  | 12 | 0.0240727  |
| 0.0755069 | 1        | 648  | 12 | 0.0240727  |
| 0.073388  | 1        | 626  | 13 | 0.0342067  |
| 0.101374  | 1        | 863  | 18 | 0.0340743  |
| 0.0616315 | 1        | 652  | 14 | 0.0319821  |
| 0.0447004 | 1        | 617  | 16 | 0.0498667  |
| 0.0762353 | 1        | 648  | 15 | 0.0410392  |
| 0.145156  | 1        | 1236 | 35 | 0.00821843 |
| 0.0687067 | 1        | 595  | 17 | 0.0454265  |
| 0.0679767 | 1        | 595  | 17 | 0.0454265  |
| 0.0889412 | 1        | 756  | 21 | 0.0456648  |
| 0.0832941 | 1        | 708  | 20 | 0.0496284  |
| 0.0508533 | 1        | 593  | 15 | 0.0491782  |
| 0.0676828 | 1        | 1048 | 23 | 0.0398828  |
| 0.0835294 | 1        | 710  | 20 | 0.0331209  |
| 0.0696692 | 1        | 594  | 17 | 0.0371109  |
| 0.0688235 | 1        | 585  | 16 | 0.0479776  |
| 0.0909621 | 1        | 780  | 15 | 0.0203386  |
| 0.0918824 | 1        | 781  | 22 | 0.0308257  |
| 0.0931765 | 1        | 792  | 20 | 0.0232782  |
| 0.0729009 | 0.961598 | 651  | 17 | 0.047192   |
| 0.0673994 | 1        | 650  | 15 | 0.0401652  |
| 0.0728617 | 1        | 621  | 18 | 0.0360604  |
| 0.0815294 | 1        | 693  | 20 | 0.0239844  |
| 0.0813094 | 1        | 693  | 20 | 0.0239844  |
| 0.0972941 | 1        | 827  | 24 | 0.044067   |
| 0.0544749 | 1        | 899  | 20 | 0.0216098  |
| 0.0707204 | 1        | 642  | 15 | 0.024311   |

|           |          |      |    |           |
|-----------|----------|------|----|-----------|
| 0.0649923 | 1        | 590  | 15 | 0.049134  |
| 0.0998017 | 1        | 906  | 24 | 0.0333063 |
| 0.0718361 | 1        | 617  | 13 | 0.0350629 |
| 0.0754029 | 1        | 641  | 18 | 0.0323264 |
| 0.0910359 | 1        | 783  | 21 | 0.0289013 |
| 0.0667059 | 1        | 567  | 11 | 0.0491782 |
| 0.102328  | 1        | 910  | 18 | 0.0231723 |
| 0.0508319 | 1        | 608  | 13 | 0.0335093 |
| 0.0702353 | 1        | 597  | 17 | 0.0494695 |
| 0.0930588 | 1        | 791  | 22 | 0.0272417 |
| 0.0709412 | 1        | 603  | 16 | 0.0307375 |
| 0.0742984 | 1        | 638  | 18 | 0.0420102 |
| 0.0703281 | 1        | 598  | 11 | 0.0368461 |
| 0.0990588 | 0.861822 | 977  | 18 | 0.0307639 |
| 0.0765882 | 1        | 651  | 16 | 0.0397768 |
| 0.0718824 | 1        | 611  | 13 | 0.0497078 |
| 0.0634079 | 1        | 777  | 21 | 0.0414717 |
| 0.0890869 | 1        | 760  | 19 | 0.0463269 |
| 0.0881977 | 1        | 760  | 19 | 0.0463269 |
| 0.0807059 | 1        | 686  | 19 | 0.0475186 |
| 0.0655834 | 1        | 561  | 14 | 0.015969  |
| 0.0424799 | 1        | 962  | 26 | 0.0239314 |
| 0.116471  | 1        | 990  | 28 | 0.0190233 |
| 0.0586976 | 1        | 603  | 16 | 0.0196148 |
| 0.0464333 | 1        | 869  | 25 | 0.0240992 |
| 0.0679623 | 1        | 605  | 17 | 0.0419572 |
| 0.0930588 | 1        | 791  | 22 | 0.0232782 |
| 0.136706  | 1        | 1162 | 33 | 0.028151  |
| 0.120235  | 1        | 1022 | 29 | 0.0218834 |
| 0.0699506 | 1        | 595  | 13 | 0.0438993 |
| 0.0229019 | 1        | 626  | 18 | 0.0436521 |
| 0.0351771 | 1        | 711  | 15 | 0.0191557 |
| 0.0457374 | 1        | 610  | 14 | 0.0414188 |
| 0.0554231 | 1        | 488  | 14 | 0.0489486 |
| 0.0393868 | 1        | 740  | 21 | 0.024311  |
| 0.0922591 | 1        | 789  | 21 | 0.0474568 |
| 0.0722353 | 1        | 614  | 17 | 0.0494077 |
| 0.0717225 | 1        | 610  | 10 | 0.0439699 |
| 0.0708235 | 1        | 602  | 16 | 0.0365283 |
| 0.0688235 | 1        | 585  | 10 | 0.0411804 |
| 0.0873034 | 1        | 755  | 16 | 0.0269946 |
| 0.0675515 | 1        | 794  | 22 | 0.045912  |
| 0.0934008 | 1        | 794  | 22 | 0.045912  |
| 0.1253    | 1        | 1096 | 29 | 0.0102488 |
| 0.0734085 | 1        | 625  | 17 | 0.0472273 |
| 0.0764011 | 1        | 653  | 13 | 0.0351954 |
| 0.0768235 | 1        | 653  | 13 | 0.0351954 |



|            |           |      |    |           |
|------------|-----------|------|----|-----------|
| 0.086      | 1         | 731  | 14 | 0.0464681 |
| 0.0607347  | 1         | 615  | 11 | 0.0319468 |
| 0.0887428  | 1         | 756  | 21 | 0.0264384 |
| 0.0947059  | 1         | 805  | 20 | 0.0213803 |
| 0.0944614  | 1         | 805  | 20 | 0.0213803 |
| 0.0699202  | 1         | 596  | 16 | 0.0469978 |
| 0.0788732  | 1         | 672  | 19 | 0.0313907 |
| 0.0910588  | 1         | 774  | 21 | 0.0326354 |
| 0.0805693  | 1         | 685  | 19 | 0.0469713 |
| 0.0334274  | 1         | 877  | 25 | 0.0329355 |
| 0.0806792  | 1         | 689  | 20 | 0.0334298 |
| 0.0885882  | 1         | 753  | 18 | 0.0452499 |
| 0.0831765  | 1         | 707  | 20 | 0.031629  |
| 0.0696991  | 1         | 593  | 16 | 0.0362194 |
| 0.0391857  | 1         | 641  | 17 | 0.0242316 |
| 0.0722353  | 1         | 614  | 12 | 0.0468212 |
| 0.0976471  | 1         | 830  | 21 | 0.0137621 |
| 0.109696   | 1         | 939  | 23 | 0.02605   |
| 0.0729412  | 1         | 620  | 12 | 0.0455677 |
| 0.0704308  | 1         | 600  | 17 | 0.0473862 |
| 0.0850588  | 1         | 723  | 16 | 0.0488515 |
| 0.107529   | 1         | 914  | 25 | 0.0478275 |
| 0.109975   | 1         | 936  | 26 | 0.0234283 |
| 0.0729412  | 1         | 620  | 17 | 0.0460532 |
| 0.0441532  | 1         | 748  | 19 | 0.0171431 |
| 0.0869412  | 1         | 739  | 21 | 0.0355661 |
| 0.162403   | 1         | 1384 | 31 | 0.0190233 |
| 0.132118   | 1         | 1123 | 31 | 0.0219364 |
| 0.0845882  | 1         | 719  | 20 | 0.0325471 |
| 0.0545882  | 1         | 464  | 11 | 0.0493282 |
| 0.00623529 | 0.0876033 | 605  | 17 | 0.0491782 |
| 0.0757593  | 1         | 651  | 18 | 0.0332003 |
| 0.100471   | 1         | 854  | 24 | 0.0216186 |
| 0.0529412  | 1         | 450  | 13 | 0.0328384 |
| 0.073165   | 1         | 623  | 18 | 0.0350012 |
| 0.124471   | 1         | 1058 | 23 | 0.0233135 |
| 0.0504994  | 1         | 627  | 11 | 0.0407479 |
| 0.102353   | 1         | 870  | 19 | 0.0241521 |
| 0.0722353  | 1         | 614  | 14 | 0.0432549 |
| 0.0498589  | 1         | 424  | 12 | 0.032141  |
| 0.0763529  | 1         | 649  | 12 | 0.0335623 |
| 0.0770756  | 1         | 661  | 19 | 0.0463622 |
| 0.0964585  | 1         | 828  | 19 | 0.0433608 |
| 0.111345   | 1         | 953  | 24 | 0.0225985 |
| 0.0710363  | 1         | 608  | 17 | 0.0495048 |
| 0.0922353  | 1         | 784  | 15 | 0.0270122 |
| 0.0703582  | 1         | 601  | 17 | 0.0439964 |

|             |           |      |    |           |
|-------------|-----------|------|----|-----------|
| 0.0712941   | 1         | 606  | 17 | 0.0308257 |
| 0.0849321   | 1         | 726  | 17 | 0.0366078 |
| 0.070048    | 1         | 598  | 17 | 0.0447291 |
| 0.100621    | 1         | 859  | 24 | 0.020065  |
| 0.000823529 | 0.0114754 | 610  | 11 | 0.048984  |
| 0.0716471   | 1         | 609  | 16 | 0.0294663 |
| 0.0757983   | 1         | 648  | 14 | 0.0447379 |
| 0.103266    | 1         | 1015 | 21 | 0.0174167 |
| 0.0631765   | 0.764957  | 702  | 16 | 0.0182642 |
| 0.0825591   | 1         | 702  | 16 | 0.0182642 |
| 0.0698824   | 1         | 594  | 17 | 0.0452234 |
| 0.0743529   | 1         | 632  | 18 | 0.0394679 |
| 0.0709412   | 1         | 603  | 17 | 0.0424074 |
| 0.0496836   | 1         | 683  | 14 | 0.042275  |
| 0.0701244   | 1         | 964  | 25 | 0.0128352 |
| 0.0727059   | 1         | 618  | 18 | 0.0196589 |
| 0.0724842   | 1         | 618  | 18 | 0.0196589 |
| 0.0547399   | 1         | 686  | 18 | 0.0384351 |
| 0.0703529   | 1         | 598  | 13 | 0.0490016 |
| 0.0713614   | 1         | 607  | 11 | 0.0418601 |
| 0.0584792   | 1         | 899  | 25 | 0.0158013 |
| 0.0712708   | 0.681869  | 899  | 25 | 0.0158013 |
| 0.100471    | 1         | 854  | 24 | 0.0079536 |
| 0.0803529   | 1         | 683  | 19 | 0.0461856 |
| 0.0702353   | 1         | 597  | 17 | 0.0486926 |
| 0.0763029   | 1         | 653  | 15 | 0.03772   |
| 0.0452176   | 1         | 746  | 16 | 0.0321587 |
| 0.0730916   | 1         | 631  | 18 | 0.0487898 |
| 0.0390927   | 1         | 617  | 11 | 0.0392384 |
| 0.11124     | 1         | 961  | 26 | 0.0267916 |
| 0.0391753   | 1         | 608  | 13 | 0.0407037 |
| 0.0516863   | 1         | 895  | 24 | 0.0241521 |
| 0.0717647   | 1         | 610  | 14 | 0.0498049 |
| 0.0770391   | 1         | 919  | 23 | 0.0308257 |
| 0.0703464   | 1         | 599  | 17 | 0.045859  |
| 0.0695294   | 1         | 591  | 15 | 0.0483484 |
| 0.0741176   | 1         | 630  | 13 | 0.0392913 |
| 0.0628682   | 1         | 587  | 17 | 0.0395915 |
| 0.0423529   | 1         | 360  | 10 | 0.0475009 |
| 0.0787059   | 1         | 669  | 18 | 0.0318939 |
| 0.0817647   | 1         | 695  | 19 | 0.044632  |
| 0.0775982   | 1         | 672  | 19 | 0.0270034 |
| 0.0787531   | 1         | 672  | 19 | 0.0270034 |
| 0.134118    | 1         | 1140 | 28 | 0.0201886 |
| 0.0908235   | 1         | 772  | 22 | 0.0339242 |
| 0.0855294   | 1         | 727  | 20 | 0.0483219 |
| 0.0750961   | 1         | 645  | 18 | 0.0439611 |

|           |          |      |    |            |
|-----------|----------|------|----|------------|
| 0.0471632 | 1        | 606  | 11 | 0.0440405  |
| 0.0706337 | 1        | 603  | 14 | 0.0360428  |
| 0.0718824 | 1        | 611  | 16 | 0.0481012  |
| 0.0809728 | 1        | 869  | 24 | 0.0283893  |
| 0.0712941 | 1        | 606  | 17 | 0.0231546  |
| 0.0778823 | 1        | 662  | 18 | 0.0322293  |
| 0.0705302 | 1        | 600  | 14 | 0.0428312  |
| 0.0709412 | 1        | 603  | 17 | 0.045912   |
| 0.0967059 | 1        | 822  | 17 | 0.0235254  |
| 0.117905  | 1        | 1047 | 28 | 0.0270917  |
| 0.0906651 | 1        | 777  | 21 | 0.033271   |
| 0.124341  | 1        | 1061 | 30 | 0.0316908  |
| 0.0776471 | 1        | 660  | 19 | 0.0350012  |
| 0.0776881 | 1        | 664  | 12 | 0.0463269  |
| 0.070649  | 1        | 602  | 17 | 0.0445525  |
| 0.0835279 | 1        | 823  | 20 | 0.0319998  |
| 0.100654  | 1        | 862  | 24 | 0.0242139  |
| 0.123079  | 1        | 1049 | 25 | 0.0455324  |
| 0.0784706 | 1        | 667  | 19 | 0.039821   |
| 0.0578993 | 1        | 667  | 19 | 0.039821   |
| 0.0807643 | 1        | 689  | 19 | 0.0439523  |
| 0.0739655 | 0.985937 | 640  | 16 | 0.0335623  |
| 0.108005  | 1        | 931  | 23 | 0.0300048  |
| 0.0859107 | 1        | 750  | 20 | 0.0347628  |
| 0.064617  | 1        | 599  | 15 | 0.0449586  |
| 0.0823775 | 1        | 711  | 20 | 0.0294398  |
| 0.0852921 | 1        | 762  | 21 | 0.017196   |
| 0.0941176 | 1        | 800  | 18 | 0.0490634  |
| 0.0747059 | 1        | 635  | 13 | 0.0456825  |
| 0.0542294 | 1        | 468  | 10 | 0.0398033  |
| 0.0837647 | 1        | 712  | 20 | 0.0497784  |
| 0.0771765 | 1        | 656  | 12 | 0.0430165  |
| 0.0456781 | 1        | 390  | 10 | 0.0430077  |
| 0.117523  | 1        | 1000 | 28 | 0.0215127  |
| 0.0764288 | 1        | 678  | 19 | 0.0161544  |
| 0.109412  | 1        | 930  | 26 | 0.0239844  |
| 0.0390769 | 1        | 552  | 16 | 0.0244964  |
| 0.0637278 | 1        | 545  | 11 | 0.0429106  |
| 0.0592134 | 1        | 545  | 11 | 0.0429106  |
| 0.0809412 | 1        | 688  | 18 | 0.0208241  |
| 0.0764706 | 1        | 650  | 18 | 0.0477569  |
| 0.109294  | 1        | 929  | 24 | 0.0170724  |
| 0.0690588 | 1        | 587  | 17 | 0.0491164  |
| 0.0885882 | 1        | 753  | 16 | 0.0331297  |
| 0.0748235 | 0.995305 | 639  | 16 | 0.0373051  |
| 0.0704706 | 1        | 599  | 14 | 0.0364577  |
| 0.146058  | 1        | 1245 | 31 | 0.00904822 |

|           |           |   |      |    |           |
|-----------|-----------|---|------|----|-----------|
| 0.107406  |           | 1 | 918  | 26 | 0.0451087 |
| 0.0438824 | 0.612479  |   | 609  | 16 | 0.0490281 |
| 0.0712364 |           | 1 | 609  | 16 | 0.0490281 |
| 0.0747194 |           | 1 | 639  | 18 | 0.0471831 |
| 0.125294  |           | 1 | 1065 | 29 | 0.0372963 |
| 0.151647  |           | 1 | 1289 | 24 | 0.0120937 |
| 0.0902353 |           | 1 | 767  | 21 | 0.0429194 |
| 0.124941  |           | 1 | 1062 | 22 | 0.0082096 |
| 0.0792683 |           | 1 | 676  | 19 | 0.0413305 |
| 0.0583246 |           | 1 | 502  | 12 | 0.045656  |
| 0.0503529 |           | 1 | 428  | 12 | 0.0489222 |
| 0.0776471 |           | 1 | 660  | 19 | 0.0283628 |
| 0.0816471 |           | 1 | 694  | 19 | 0.0335005 |
| 0.0427978 |           | 1 | 763  | 21 | 0.0301548 |
| 0.119522  |           | 1 | 1020 | 21 | 0.0350453 |
| 0.072     |           | 1 | 612  | 16 | 0.0484366 |
| 0.05459   |           | 1 | 468  | 13 | 0.0189968 |
| 0.0103214 | 0.0869565 |   | 1012 | 28 | 0.0326707 |
| 0.0962526 |           | 1 | 1012 | 28 | 0.0326707 |
| 0.0802353 |           | 1 | 682  | 19 | 0.0480482 |
| 0.0877647 |           | 1 | 746  | 17 | 0.0190498 |
| 0.07      |           | 1 | 595  | 17 | 0.0488869 |
| 0.0698824 |           | 1 | 594  | 17 | 0.0451705 |
| 0.088     |           | 1 | 748  | 19 | 0.0394944 |
| 0.082306  |           | 1 | 701  | 17 | 0.0492311 |
| 0.0771765 |           | 1 | 656  | 19 | 0.0487456 |
| 0.076806  |           | 1 | 656  | 19 | 0.0487456 |
| 0.0928235 |           | 1 | 789  | 19 | 0.0480747 |
| 0.0485673 |           | 1 | 439  | 10 | 0.0431754 |
| 0.082876  |           | 1 | 755  | 21 | 0.0333063 |
| 0.081888  |           | 1 | 746  | 21 | 0.0335181 |
| 0.0668496 | 0.991857  |   | 614  | 16 | 0.0420808 |
| 0.0773298 |           | 1 | 702  | 18 | 0.0432107 |
| 0.0648105 |           | 1 | 554  | 16 | 0.0449586 |
| 0.0693777 |           | 1 | 592  | 11 | 0.0196148 |
| 0.0697293 |           | 1 | 595  | 17 | 0.0302873 |
| 0.0300966 |           | 1 | 614  | 16 | 0.0447114 |
| 0.0101365 |           | 1 | 343  | 10 | 0.0474921 |
| 0.111143  |           | 1 | 1175 | 32 | 0.0159955 |
| 0.0737647 |           | 1 | 627  | 12 | 0.0425222 |
| 0.0692941 |           | 1 | 589  | 17 | 0.0414099 |
| 0.0983529 |           | 1 | 836  | 21 | 0.0494253 |
| 0.0326521 | 0.374663  |   | 742  | 20 | 0.031629  |
| 0.0475241 |           | 1 | 405  | 12 | 0.0237196 |
| 0.118706  |           | 1 | 1009 | 28 | 0.0199944 |
| 0.102673  |           | 1 | 941  | 25 | 0.0244523 |
| 0.0685794 |           | 1 | 588  | 13 | 0.044173  |

|           |          |      |    |           |
|-----------|----------|------|----|-----------|
| 0.0748235 | 1        | 636  | 18 | 0.0489133 |
| 0.101412  | 1        | 862  | 25 | 0.0324147 |
| 0.117597  | 1        | 1096 | 31 | 0.016684  |
| 0.0791765 | 1        | 673  | 19 | 0.0323441 |
| 0.0797647 | 1        | 678  | 19 | 0.0371462 |
| 0.0814145 | 1        | 693  | 19 | 0.0345245 |
| 0.0687966 | 1        | 590  | 17 | 0.0446232 |
| 0.070363  | 1        | 599  | 17 | 0.04683   |
| 0.111748  | 1        | 955  | 27 | 0.0297841 |
| 0.155765  | 1        | 1324 | 34 | 0.0234283 |
| 0.0908235 | 1        | 772  | 16 | 0.012694  |
| 0.0695049 | 1        | 591  | 17 | 0.0494077 |
| 0.0607981 | 1        | 518  | 15 | 0.0219364 |
| 0.109961  | 0.944444 | 990  | 24 | 0.0492311 |
| 0.0941095 | 1        | 818  | 23 | 0.0283717 |
| 0.0735916 | 1        | 627  | 18 | 0.0413658 |
| 0.0450588 | 1        | 383  | 11 | 0.0497961 |
| 0.0532941 | 1        | 453  | 13 | 0.0440141 |
| 0.0734102 | 1        | 643  | 18 | 0.0415423 |
| 0.0718264 | 1        | 619  | 17 | 0.0486926 |
| 0.0443529 | 1        | 377  | 11 | 0.0427341 |
| 0.0781176 | 1        | 664  | 18 | 0.0413393 |
| 0.106328  | 1        | 941  | 26 | 0.0270475 |
| 0.0710421 | 1        | 604  | 17 | 0.0133649 |
| 0.110813  | 1        | 949  | 24 | 0.0470419 |
| 0.126476  | 1        | 1082 | 24 | 0.0356014 |
| 0.0754052 | 1        | 642  | 18 | 0.0436786 |
| 0.0654643 | 1        | 1118 | 27 | 0.033677  |
| 0.116     | 1        | 986  | 28 | 0.0470772 |
| 0.0749412 | 1        | 637  | 18 | 0.0219452 |
| 0.145264  | 1        | 1250 | 34 | 0.0140446 |
| 0.0694118 | 1        | 590  | 11 | 0.0357956 |
| 0.0987915 | 0.80038  | 1052 | 28 | 0.0168606 |
| 0.123634  | 1        | 1052 | 28 | 0.0168606 |
| 0.101412  | 1        | 862  | 24 | 0.0172931 |
| 0.095522  | 1        | 817  | 23 | 0.0319468 |
| 0.0961176 | 1        | 817  | 23 | 0.0319468 |
| 0.148687  | 0.992175 | 1278 | 36 | 0.0142829 |
| 0.0782353 | 1        | 665  | 18 | 0.0400593 |
| 0.0882353 | 1        | 750  | 20 | 0.0193588 |
| 0.0542353 | 0.782683 | 589  | 17 | 0.0493459 |
| 0.105541  | 1        | 901  | 19 | 0.0346216 |
| 0.0694118 | 1        | 590  | 17 | 0.0453205 |
| 0.0380673 | 1        | 598  | 17 | 0.0499462 |
| 0.125149  | 1        | 1153 | 26 | 0.0350012 |
| 0.0591695 | 1        | 503  | 12 | 0.0454088 |
| 0.0851882 | 1        | 731  | 20 | 0.0297135 |

|           |   |      |    |           |
|-----------|---|------|----|-----------|
| 0.0676852 | 1 | 824  | 19 | 0.0440317 |
| 0.107349  | 1 | 913  | 23 | 0.0234459 |
| 0.0743132 | 1 | 633  | 14 | 0.0261825 |
| 0.073961  | 1 | 630  | 18 | 0.0343656 |
| 0.06965   | 1 | 593  | 10 | 0.0498844 |
| 0.0980097 | 1 | 847  | 24 | 0.0283628 |
| 0.0728726 | 1 | 620  | 14 | 0.0447909 |
| 0.0959934 | 1 | 817  | 21 | 0.0344627 |
| 0.0468702 | 1 | 760  | 20 | 0.0347187 |
| 0.0571204 | 1 | 655  | 15 | 0.0425222 |
| 0.0890721 | 1 | 767  | 14 | 0.0422574 |
| 0.0689412 | 1 | 586  | 11 | 0.0483925 |
| 0.0674603 | 1 | 612  | 16 | 0.0487456 |
| 0.0698311 | 1 | 612  | 16 | 0.0487456 |
| 0.0680947 | 1 | 604  | 17 | 0.038594  |
| 0.0828235 | 1 | 704  | 19 | 0.023543  |
| 0.121176  | 1 | 1030 | 36 | 0.0219276 |
| 0.0694118 | 1 | 590  | 14 | 0.0452587 |

| Fraction of negatively enriched windows in region | MAT-score on T(H3K14acHETHF vs. control) |
|---------------------------------------------------|------------------------------------------|
| 0                                                 | 7.7194                                   |
| 0                                                 | 6.6836                                   |
| 0                                                 | 5.26481                                  |
| 0                                                 | 6.23831                                  |
| 0                                                 | 6.22055                                  |
| 0                                                 | 5.28564                                  |
| 0                                                 | 5.35584                                  |
| 0                                                 | 8.01373                                  |
| 0                                                 | 14.229                                   |
| 0                                                 | 6.04146                                  |
| 0                                                 | 5.24906                                  |
| 0                                                 | 5.56267                                  |
| 0                                                 | 5.30947                                  |
| 0                                                 | 5.36827                                  |
| 0                                                 | 7.37603                                  |
| 0                                                 | 8.63086                                  |
| 0                                                 | 5.38459                                  |
| 0                                                 | 6.57788                                  |
| 0                                                 | 5.26679                                  |
| 0                                                 | 5.63267                                  |
| 0                                                 | 5.71999                                  |
| 0                                                 | 6.35944                                  |
| 0                                                 | 7.32259                                  |
| 0                                                 | 5.63523                                  |
| 0                                                 | 8.09561                                  |
| 0                                                 | 6.03958                                  |
| 0                                                 | 5.43671                                  |
| 0                                                 | 5.70547                                  |
| 0                                                 | 5.94233                                  |
| 0                                                 | 5.53659                                  |
| 0                                                 | 5.62893                                  |
| 0                                                 | 15.5566                                  |
| 0                                                 | 5.40115                                  |
| 0                                                 | 6.0175                                   |
| 0                                                 | 6.48355                                  |
| 0                                                 | 5.75362                                  |
| 0                                                 | 5.39124                                  |
| 0                                                 | 6.55687                                  |
| 0                                                 | 5.36504                                  |
| 0                                                 | 6.40835                                  |
| 0                                                 | 5.64867                                  |
| 0                                                 | 5.28459                                  |
| 0                                                 | 5.5109                                   |
| 0                                                 | 9.08711                                  |

|   |         |
|---|---------|
| 0 | 5.2611  |
| 0 | 7.39983 |
| 0 | 7.39983 |
| 0 | 6.30286 |
| 0 | 5.34683 |
| 0 | 6.27249 |
| 0 | 5.24639 |
| 0 | 7.56544 |
| 0 | 6.00345 |
| 0 | 5.34083 |
| 0 | 5.34083 |
| 0 | 5.73982 |
| 0 | 5.52155 |
| 0 | 6.0252  |
| 0 | 6.80397 |
| 0 | 5.60622 |
| 0 | 5.52592 |
| 0 | 8.11619 |
| 0 | 6.28488 |
| 0 | 5.2888  |
| 0 | 5.39261 |
| 0 | 5.30548 |
| 0 | 6.20483 |
| 0 | 5.69319 |
| 0 | 6.21941 |
| 0 | 11.1721 |
| 0 | 7.01053 |
| 0 | 5.57561 |
| 0 | 5.453   |
| 0 | 5.658   |
| 0 | 7.25598 |
| 0 | 7.25598 |
| 0 | 5.42703 |
| 0 | 5.42703 |
| 0 | 5.2346  |
| 0 | 5.6303  |
| 0 | 5.49211 |
| 0 | 5.54245 |
| 0 | 7.72404 |
| 0 | 5.57662 |
| 0 | 5.28552 |
| 0 | 7.10108 |
| 0 | 5.44481 |
| 0 | 5.25098 |
| 0 | 5.7518  |
| 0 | 7.00838 |
| 0 | 6.22782 |



|   |         |
|---|---------|
| 0 | 6.10675 |
| 0 | 7.31823 |
| 0 | 5.30261 |
| 0 | 6.49434 |
| 0 | 6.49434 |
| 0 | 8.24258 |
| 0 | 5.53118 |
| 0 | 6.36394 |
| 0 | 6.19965 |
| 0 | 6.10324 |
| 0 | 5.50805 |
| 0 | 6.1073  |
| 0 | 5.34874 |
| 0 | 7.64982 |
| 0 | 5.41797 |
| 0 | 7.35621 |
| 0 | 6.34897 |
| 0 | 5.84129 |
| 0 | 5.57308 |
| 0 | 5.36333 |
| 0 | 6.52942 |
| 0 | 5.28988 |
| 0 | 5.42624 |
| 0 | 5.42624 |
| 0 | 5.40998 |
| 0 | 5.24266 |
| 0 | 5.57922 |
| 0 | 5.57922 |
| 0 | 5.26894 |
| 0 | 6.23634 |
| 0 | 10.7426 |
| 0 | 6.30804 |
| 0 | 6.05125 |
| 0 | 6.05125 |
| 0 | 6.01431 |
| 0 | 8.12411 |
| 0 | 5.48318 |
| 0 | 7.16354 |
| 0 | 6.3259  |
| 0 | 6.3259  |
| 0 | 6.20479 |
| 0 | 5.38772 |
| 0 | 5.56223 |
| 0 | 6.29249 |
| 0 | 8.10604 |
| 0 | 5.2881  |
| 0 | 7.42606 |

|   |         |
|---|---------|
| 0 | 5.37048 |
| 0 | 6.09208 |
| 0 | 5.26176 |
| 0 | 5.36298 |
| 0 | 5.81984 |
| 0 | 5.65811 |
| 0 | 6.46108 |
| 0 | 5.79799 |
| 0 | 7.10038 |
| 0 | 5.95663 |
| 0 | 5.82483 |
| 0 | 6.5838  |
| 0 | 5.92847 |
| 0 | 5.92847 |
| 0 | 6.57896 |
| 0 | 5.30492 |
| 0 | 5.96032 |
| 0 | 5.41611 |
| 0 | 5.25601 |
| 0 | 6.08593 |
| 0 | 5.67186 |
| 0 | 5.44723 |
| 0 | 5.45429 |
| 0 | 5.71903 |
| 0 | 5.53646 |
| 0 | 7.10509 |
| 0 | 6.05161 |
| 0 | 6.82584 |
| 0 | 8.04362 |
| 0 | 5.77592 |
| 0 | 5.59424 |
| 0 | 5.6516  |
| 0 | 5.42139 |
| 0 | 5.42139 |
| 0 | 5.81734 |
| 0 | 5.81734 |
| 0 | 5.34913 |
| 0 | 5.51708 |
| 0 | 5.77241 |
| 0 | 6.01757 |
| 0 | 5.44258 |
| 0 | 5.41294 |
| 0 | 5.40892 |
| 0 | 7.44043 |
| 0 | 5.58179 |
| 0 | 6.24376 |
| 0 | 9.02253 |

|   |         |
|---|---------|
| 0 | 8.81767 |
| 0 | 8.18147 |
| 0 | 5.41331 |
| 0 | 8.03823 |
| 0 | 5.28444 |
| 0 | 5.32129 |
| 0 | 5.81132 |
| 0 | 5.69121 |
| 0 | 5.55564 |
| 0 | 5.80159 |
| 0 | 5.37566 |
| 0 | 5.26145 |
| 0 | 7.37448 |
| 0 | 9.08079 |
| 0 | 10.0363 |
| 0 | 6.75061 |
| 0 | 7.14981 |
| 0 | 9.9384  |
| 0 | 6.55983 |
| 0 | 5.48701 |
| 0 | 6.25346 |
| 0 | 7.07399 |
| 0 | 5.46585 |
| 0 | 5.39884 |
| 0 | 6.16264 |
| 0 | 5.28679 |
| 0 | 6.18937 |
| 0 | 17.4047 |
| 0 | 5.88465 |
| 0 | 5.30586 |
| 0 | 5.30586 |
| 0 | 5.8999  |
| 0 | 5.67545 |
| 0 | 7.4133  |
| 0 | 7.17603 |
| 0 | 7.14394 |
| 0 | 6.07685 |
| 0 | 5.67662 |
| 0 | 6.39391 |
| 0 | 5.55896 |
| 0 | 5.56997 |
| 0 | 5.30192 |
| 0 | 5.25582 |
| 0 | 5.27851 |
| 0 | 5.27851 |
| 0 | 7.05315 |
| 0 | 7.66177 |

|       |         |
|-------|---------|
| 0     | 5.6831  |
| 0     | 7.51715 |
| 0     | 5.2662  |
| 0     | 5.61887 |
| 0     | 5.33748 |
| 0     | 6.02043 |
| 0.125 | 6.11591 |
| 0     | 6.2532  |
| 0     | 5.93301 |
| 0     | 6.91525 |
| 0     | 7.91358 |
| 0     | 5.75588 |
| 0     | 6.08825 |
| 0     | 5.50862 |
| 0     | 6.44742 |
| 0     | 5.30753 |
| 0     | 6.04403 |
| 0     | 5.73583 |
| 0     | 9.69842 |
| 0     | 9.08197 |
| 0     | 6.02587 |
| 0     | 5.77617 |
| 0     | 5.29422 |
| 0     | 8.24355 |
| 0     | 6.89821 |
| 0     | 5.35304 |
| 0     | 11.1729 |
| 0     | 8.12697 |
| 0     | 6.43229 |
| 0     | 5.25687 |
| 0     | 5.87481 |
| 0     | 5.8015  |
| 0     | 8.03659 |
| 0     | 5.24059 |
| 0     | 9.79825 |
| 0     | 5.25148 |
| 0     | 5.55653 |
| 0     | 5.55653 |
| 0     | 7.68226 |
| 0     | 7.68226 |
| 0     | 5.46979 |
| 0     | 12.3629 |
| 0     | 6.0459  |
| 0     | 5.23881 |
| 0     | 5.24662 |
| 0     | 5.43601 |
| 0     | 6.54748 |

|     |         |
|-----|---------|
| 0   | 9.42989 |
| 0   | 5.42913 |
| 0   | 7.23534 |
| 0   | 5.36577 |
| 0   | 5.36577 |
| 0.2 | 6.73597 |
| 0   | 5.52643 |
| 0   | 7.52944 |
| 0   | 7.30763 |
| 0   | 5.40847 |
| 0   | 5.81872 |
| 0   | 7.6907  |
| 0   | 5.42221 |
| 0   | 5.44733 |
| 0   | 5.43397 |
| 0   | 5.40747 |
| 0   | 8.02049 |
| 0   | 5.48564 |
| 0   | 9.93922 |
| 0   | 5.4498  |
| 0   | 7.20432 |
| 0   | 5.68525 |
| 0   | 5.31946 |
| 0   | 5.66818 |
| 0   | 6.25682 |
| 0   | 5.32604 |
| 0   | 5.30674 |
| 0   | 5.47949 |
| 0   | 7.33034 |
| 0   | 5.2713  |
| 0   | 5.5058  |
| 0   | 8.12267 |
| 0   | 8.12267 |
| 0   | 7.98497 |
| 0   | 6.19719 |
| 0   | 6.77967 |
| 0   | 6.07109 |
| 0   | 7.07317 |
| 0   | 8.61149 |
| 0   | 7.08503 |
| 0   | 6.39377 |
| 0   | 6.08443 |
| 0   | 6.97192 |
| 0   | 6.07154 |
| 0   | 8.46191 |
| 0   | 5.32648 |
| 0   | 6.22769 |

|   |         |
|---|---------|
| 0 | 5.24143 |
| 0 | 8.0695  |
| 0 | 5.53485 |
| 0 | 5.44891 |
| 0 | 6.72364 |
| 0 | 5.40145 |
| 0 | 5.40145 |
| 0 | 5.27874 |
| 0 | 7.51152 |
| 0 | 5.42455 |
| 0 | 6.20886 |
| 0 | 7.40687 |
| 0 | 5.37563 |
| 0 | 5.41265 |
| 0 | 5.41265 |
| 0 | 5.50207 |
| 0 | 5.51408 |
| 0 | 5.51408 |
| 0 | 5.80118 |
| 0 | 14.261  |
| 0 | 5.50467 |
| 0 | 5.65388 |
| 0 | 10.6196 |
| 0 | 6.21922 |
| 0 | 5.73509 |
| 0 | 5.6996  |
| 0 | 6.04081 |
| 0 | 8.00177 |
| 0 | 5.69112 |
| 0 | 6.04532 |
| 0 | 7.02656 |
| 0 | 6.12406 |
| 0 | 5.33426 |
| 0 | 7.4052  |
| 0 | 5.27167 |
| 0 | 5.45814 |
| 0 | 5.26105 |
| 0 | 6.25514 |
| 0 | 7.21065 |
| 0 | 5.64897 |
| 0 | 5.64897 |
| 0 | 5.43292 |
| 0 | 6.29466 |
| 0 | 5.29059 |
| 0 | 5.59777 |
| 0 | 6.52441 |
| 0 | 5.42226 |

|   |         |
|---|---------|
| 0 | 5.70967 |
| 0 | 5.43595 |
| 0 | 5.45066 |
| 0 | 12.0814 |
| 0 | 5.43418 |
| 0 | 6.15452 |
| 0 | 5.34832 |
| 0 | 5.39035 |
| 0 | 8.05782 |
| 0 | 5.72867 |
| 0 | 5.72867 |
| 0 | 9.15652 |
| 0 | 5.45121 |
| 0 | 7.25009 |
| 0 | 5.35718 |
| 0 | 5.26929 |
| 0 | 5.4831  |
| 0 | 6.25217 |
| 0 | 5.63635 |
| 0 | 5.63635 |
| 0 | 7.22589 |
| 0 | 5.29174 |
| 0 | 5.3963  |
| 0 | 5.50348 |
| 0 | 5.52938 |
| 0 | 5.95766 |
| 0 | 6.3197  |
| 0 | 6.298   |
| 0 | 5.76603 |
| 0 | 5.39618 |
| 0 | 5.9782  |
| 0 | 5.31135 |
| 0 | 5.31135 |
| 0 | 5.25642 |
| 0 | 8.06965 |
| 0 | 6.06195 |
| 0 | 5.59752 |
| 0 | 6.18787 |
| 0 | 7.13303 |
| 0 | 5.28792 |
| 0 | 5.28486 |
| 0 | 6.32774 |
| 0 | 6.23054 |
| 0 | 5.76286 |
| 0 | 6.03614 |
| 0 | 6.03614 |
| 0 | 6.24021 |

|   |         |
|---|---------|
| 0 | 7.9269  |
| 0 | 5.3045  |
| 0 | 6.15451 |
| 0 | 7.11861 |
| 0 | 6.25154 |
| 0 | 5.69861 |
| 0 | 5.51444 |
| 0 | 5.24423 |
| 0 | 6.72832 |
| 0 | 6.02259 |
| 0 | 6.3179  |
| 0 | 6.61054 |
| 0 | 5.23464 |
| 0 | 8.18804 |
| 0 | 5.80081 |
| 0 | 7.0941  |
| 0 | 6.87517 |
| 0 | 5.2705  |
| 0 | 8.58173 |
| 0 | 7.3492  |
| 0 | 7.00175 |
| 0 | 8.33392 |
| 0 | 5.3078  |
| 0 | 5.24102 |
| 0 | 6.17612 |
| 0 | 5.30934 |
| 0 | 5.38803 |
| 0 | 6.33386 |
| 0 | 9.0188  |
| 0 | 5.41403 |
| 0 | 5.24322 |
| 0 | 7.41944 |
| 0 | 5.72664 |
| 0 | 5.26921 |
| 0 | 6.07762 |
| 0 | 5.64675 |
| 0 | 6.07976 |
| 0 | 5.24852 |
| 0 | 5.96422 |
| 0 | 5.29438 |
| 0 | 6.23462 |
| 0 | 5.49933 |
| 0 | 5.47973 |
| 0 | 5.35099 |
| 0 | 8.24323 |
| 0 | 6.77847 |
| 0 | 5.54839 |



|   |         |
|---|---------|
| 0 | 6.49955 |
| 0 | 5.59435 |
| 0 | 9.52289 |
| 0 | 6.04052 |
| 0 | 7.2315  |
| 0 | 8.4226  |
| 0 | 6.0476  |
| 0 | 5.31881 |
| 0 | 5.6752  |
| 0 | 5.73491 |
| 0 | 8.28632 |
| 0 | 6.38906 |
| 0 | 6.3593  |
| 0 | 6.03998 |
| 0 | 5.36381 |
| 0 | 5.48946 |
| 0 | 6.7602  |
| 0 | 5.25845 |
| 0 | 5.30882 |
| 0 | 5.8423  |
| 0 | 5.26262 |
| 0 | 5.6716  |
| 0 | 5.38064 |
| 0 | 6.00653 |
| 0 | 5.3497  |
| 0 | 5.53007 |
| 0 | 5.35619 |
| 0 | 5.37396 |
| 0 | 5.98207 |
| 0 | 5.53511 |
| 0 | 5.41983 |
| 0 | 5.723   |
| 0 | 5.45562 |
| 0 | 6.58652 |
| 0 | 5.7473  |
| 0 | 6.67131 |
| 0 | 5.27741 |
| 0 | 5.28218 |
| 0 | 6.05347 |
| 0 | 6.52117 |
| 0 | 5.26028 |
| 0 | 5.32338 |
| 0 | 5.39088 |
| 0 | 5.47429 |
| 0 | 5.47659 |
| 0 | 5.23789 |
| 0 | 5.63116 |

|   |         |
|---|---------|
| 0 | 7.00084 |
| 0 | 6.69342 |
| 0 | 6.69342 |
| 0 | 8.1593  |
| 0 | 5.25427 |
| 0 | 5.37069 |
| 0 | 5.60251 |
| 0 | 6.22536 |
| 0 | 10.4868 |
| 0 | 10.4975 |
| 0 | 7.11997 |
| 0 | 5.34122 |
| 0 | 5.37491 |
| 0 | 5.33026 |
| 0 | 5.68096 |
| 0 | 5.75446 |
| 0 | 6.36036 |
| 0 | 5.53224 |
| 0 | 5.44538 |
| 0 | 5.99816 |
| 0 | 5.64556 |
| 0 | 5.89043 |
| 0 | 7.84759 |
| 0 | 5.8603  |
| 0 | 7.04411 |
| 0 | 8.10219 |
| 0 | 5.60766 |
| 0 | 5.24917 |
| 0 | 5.82156 |
| 0 | 5.58194 |
| 0 | 7.44596 |
| 0 | 5.29758 |
| 0 | 9.96821 |
| 0 | 5.24483 |
| 0 | 8.08364 |
| 0 | 7.02436 |
| 0 | 5.8574  |
| 0 | 5.69849 |
| 0 | 5.48455 |
| 0 | 6.28049 |
| 0 | 11.0999 |
| 0 | 6.10456 |
| 0 | 5.4502  |
| 0 | 5.28357 |
| 0 | 5.33254 |
| 0 | 5.43248 |
| 0 | 5.69432 |

|          |         |
|----------|---------|
| 0        | 6.62681 |
| 0        | 5.60602 |
| 0        | 5.60602 |
| 0        | 5.33165 |
| 0        | 5.32439 |
| 0        | 6.12498 |
| 0        | 6.67009 |
| 0        | 5.30368 |
| 0        | 6.03781 |
| 0        | 6.48109 |
| 0        | 5.49347 |
| 0        | 6.31468 |
| 0        | 8.09081 |
| 0        | 7.87934 |
| 0        | 6.20851 |
| 0        | 6.09095 |
| 0        | 5.30643 |
| 0        | 5.50749 |
| 0        | 5.8653  |
| 0        | 6.05373 |
| 0        | 11.1105 |
| 0        | 6.80542 |
| 0        | 5.62999 |
| 0        | 5.27068 |
| 0        | 6.05139 |
| 0        | 5.62513 |
| 0        | 6.27564 |
| 0        | 5.23281 |
| 0        | 5.29511 |
| 0        | 6.64132 |
| 0        | 7.33785 |
| 0        | 8.07015 |
| 0        | 5.55698 |
| 0        | 6.1865  |
| 0        | 5.38119 |
| 0        | 6.30267 |
| 0        | 7.66455 |
| 0        | 5.45467 |
| 0        | 6.05407 |
| 0.142857 | 7.873   |
| 0        | 8.02607 |
| 0        | 5.68598 |
| 0        | 5.51875 |
| 0        | 5.79008 |
| 0        | 5.28241 |
| 0        | 6.05452 |
| 0        | 5.2513  |

|   |         |
|---|---------|
| 0 | 5.24815 |
| 0 | 5.28697 |
| 0 | 10.3002 |
| 0 | 8.20056 |
| 0 | 5.25821 |
| 0 | 5.26099 |
| 0 | 6.24007 |
| 0 | 5.36519 |
| 0 | 6.44956 |
| 0 | 5.34843 |
| 0 | 5.27267 |
| 0 | 5.24946 |
| 0 | 5.24159 |
| 0 | 5.42789 |
| 0 | 5.34766 |
| 0 | 5.30358 |
| 0 | 5.37439 |
| 0 | 6.22797 |
| 0 | 6.17728 |
| 0 | 5.43776 |
| 0 | 6.13461 |
| 0 | 5.68868 |
| 0 | 5.94336 |
| 0 | 5.35575 |
| 0 | 5.70571 |
| 0 | 6.15783 |
| 0 | 6.27763 |
| 0 | 6.35528 |
| 0 | 7.80882 |
| 0 | 5.58347 |
| 0 | 6.06656 |
| 0 | 6.22188 |
| 0 | 5.52607 |
| 0 | 5.81591 |
| 0 | 5.78044 |
| 0 | 5.38561 |
| 0 | 5.63459 |
| 0 | 5.23708 |
| 0 | 7.32096 |
| 0 | 5.82923 |
| 0 | 5.25754 |
| 0 | 5.23444 |
| 0 | 6.045   |
| 0 | 5.34552 |
| 0 | 5.31862 |
| 0 | 6.69324 |
| 0 | 5.26926 |

|   |         |
|---|---------|
| 0 | 6.94448 |
| 0 | 5.50938 |
| 0 | 5.2507  |
| 0 | 5.32716 |
| 0 | 5.35295 |
| 0 | 7.3865  |
| 0 | 6.02964 |
| 0 | 5.61344 |
| 0 | 6.04488 |
| 0 | 5.32155 |
| 0 | 5.26536 |
| 0 | 6.07844 |
| 0 | 5.30164 |
| 0 | 5.37138 |
| 0 | 5.26517 |
| 0 | 5.49185 |
| 0 | 5.24582 |
| 0 | 6.2558  |
| 0 | 5.47437 |
| 0 | 8.74752 |
| 0 | 10.3688 |
| 0 | 5.41666 |
| 0 | 6.00006 |
| 0 | 7.14103 |
| 0 | 5.34233 |
| 0 | 5.23738 |
| 0 | 7.01352 |
| 0 | 6.29197 |
| 0 | 6.08806 |
| 0 | 6.23114 |
| 0 | 5.3172  |
| 0 | 6.433   |
| 0 | 6.667   |
| 0 | 5.35244 |
| 0 | 10.1395 |
| 0 | 9.18491 |
| 0 | 8.91371 |
| 0 | 8.16583 |
| 0 | 8.16583 |
| 0 | 5.53113 |
| 0 | 6.37437 |
| 0 | 6.1683  |
| 0 | 5.28316 |
| 0 | 5.84721 |
| 0 | 5.84721 |
| 0 | 5.54994 |
| 0 | 6.01756 |

|   |         |
|---|---------|
| 0 | 6.13047 |
| 0 | 5.69118 |
| 0 | 7.11186 |
| 0 | 9.09726 |
| 0 | 5.27363 |
| 0 | 5.28442 |
| 0 | 5.7112  |
| 0 | 8.11625 |
| 0 | 6.46297 |
| 0 | 5.3554  |
| 0 | 5.60778 |
| 0 | 5.42542 |
| 0 | 7.14346 |
| 0 | 7.00245 |
| 0 | 8.26802 |
| 0 | 5.57505 |
| 0 | 5.97464 |
| 0 | 5.73071 |
| 0 | 5.32855 |
| 0 | 5.68779 |
| 0 | 6.1906  |
| 0 | 5.34814 |
| 0 | 8.06493 |
| 0 | 5.8539  |
| 0 | 6.06636 |
| 0 | 5.57451 |
| 0 | 5.5769  |
| 0 | 5.24889 |
| 0 | 7.06633 |
| 0 | 7.06633 |
| 0 | 6.02075 |
| 0 | 5.45127 |
| 0 | 6.46412 |
| 0 | 6.19215 |
| 0 | 6.26752 |
| 0 | 7.00798 |
| 0 | 5.59063 |
| 0 | 8.06491 |
| 0 | 5.37552 |
| 0 | 7.08179 |
| 0 | 5.29772 |
| 0 | 6.64233 |
| 0 | 6.31242 |
| 0 | 6.17713 |
| 0 | 6.31801 |
| 0 | 5.8114  |
| 0 | 5.50377 |

|   |         |
|---|---------|
| 0 | 5.30174 |
| 0 | 8.37292 |
| 0 | 5.42296 |
| 0 | 5.35837 |
| 0 | 6.6499  |
| 0 | 5.61685 |
| 0 | 6.04929 |
| 0 | 6.3246  |
| 0 | 6.25148 |
| 0 | 5.36266 |
| 0 | 5.50413 |
| 0 | 6.04418 |
| 0 | 7.3756  |
| 0 | 6.02292 |
| 0 | 5.28296 |
| 0 | 5.55458 |
| 0 | 6.21958 |
| 0 | 5.54194 |
| 0 | 8.44    |
| 0 | 5.52764 |
| 0 | 8.04889 |
| 0 | 10.0331 |
| 0 | 5.27468 |
| 0 | 5.44073 |
| 0 | 5.25582 |
| 0 | 7.19186 |
| 0 | 6.19723 |
| 0 | 5.34857 |
| 0 | 5.34857 |
| 0 | 8.46336 |
| 0 | 6.40406 |
| 0 | 7.12394 |
| 0 | 5.25577 |
| 0 | 7.11521 |
| 0 | 7.09038 |
| 0 | 5.33403 |
| 0 | 5.62192 |
| 0 | 5.35533 |
| 0 | 7.1538  |
| 0 | 5.37405 |
| 0 | 6.06801 |
| 0 | 5.56034 |
| 0 | 6.14819 |
| 0 | 6.70895 |
| 0 | 6.50433 |
| 0 | 6.26513 |
| 0 | 6.05553 |

|   |         |
|---|---------|
| 0 | 7.48038 |
| 0 | 7.48038 |
| 0 | 6.86926 |
| 0 | 6.13106 |
| 0 | 6.72173 |
| 0 | 5.30638 |
| 0 | 5.86997 |
| 0 | 5.52228 |
| 0 | 5.32989 |
| 0 | 6.11754 |
| 0 | 5.35854 |
| 0 | 6.08283 |
| 0 | 17.0205 |
| 0 | 5.70702 |
| 0 | 5.49278 |
| 0 | 8.24474 |
| 0 | 5.41902 |
| 0 | 6.01531 |
| 0 | 6.85103 |
| 0 | 6.52168 |
| 0 | 7.43286 |
| 0 | 5.36555 |
| 0 | 6.52311 |
| 0 | 5.51197 |
| 0 | 5.66108 |
| 0 | 5.44097 |
| 0 | 5.31737 |
| 0 | 5.38301 |
| 0 | 6.00253 |
| 0 | 7.30546 |
| 0 | 6.43796 |
| 0 | 6.26959 |
| 0 | 6.03132 |
| 0 | 8.37252 |
| 0 | 5.30364 |
| 0 | 6.35984 |
| 0 | 5.45822 |
| 0 | 5.48376 |
| 0 | 5.48376 |
| 0 | 5.69081 |
| 0 | 6.12595 |
| 0 | 6.12109 |
| 0 | 6.12109 |
| 0 | 5.66359 |
| 0 | 5.66359 |
| 0 | 6.08238 |
| 0 | 6.08238 |



|   |         |
|---|---------|
| 0 | 7.38755 |
| 0 | 6.07109 |
| 0 | 5.90534 |
| 0 | 6.64938 |
| 0 | 7.16935 |
| 0 | 6.49869 |
| 0 | 5.58187 |
| 0 | 6.11756 |
| 0 | 7.11744 |
| 0 | 7.39771 |
| 0 | 7.3482  |
| 0 | 5.27397 |
| 0 | 6.03558 |
| 0 | 5.42167 |
| 0 | 6.36323 |
| 0 | 5.77458 |
| 0 | 5.24991 |
| 0 | 10.1074 |
| 0 | 6.12373 |
| 0 | 5.46223 |
| 0 | 5.46223 |
| 0 | 5.28164 |
| 0 | 5.28164 |
| 0 | 5.29784 |
| 0 | 5.32968 |
| 0 | 6.02136 |
| 0 | 5.59785 |
| 0 | 5.41658 |
| 0 | 5.34647 |
| 0 | 5.74405 |
| 0 | 7.16464 |
| 0 | 5.25899 |
| 0 | 7.28586 |
| 0 | 6.0948  |
| 0 | 6.21761 |
| 0 | 7.22835 |
| 0 | 7.34857 |
| 0 | 8.31285 |
| 0 | 5.53593 |
| 0 | 5.28924 |
| 0 | 14.3793 |
| 0 | 5.87794 |
| 0 | 12.1389 |
| 0 | 5.69051 |
| 0 | 7.55581 |
| 0 | 6.45238 |
| 0 | 6.37146 |

|     |         |
|-----|---------|
| 0   | 5.50644 |
| 0   | 5.32363 |
| 0   | 6.11585 |
| 0   | 8.12588 |
| 0   | 5.26757 |
| 0   | 9.42034 |
| 0   | 6.00948 |
| 0   | 6.47749 |
| 0   | 6.21593 |
| 0   | 6.06001 |
| 0   | 5.39387 |
| 0   | 5.77691 |
| 0   | 5.25666 |
| 0   | 5.6018  |
| 0   | 5.6018  |
| 0   | 5.53118 |
| 0   | 6.34957 |
| 0   | 8.39646 |
| 0   | 6.31385 |
| 0   | 6.82906 |
| 0   | 5.72215 |
| 0   | 5.63095 |
| 0   | 7.14235 |
| 0   | 8.11584 |
| 0   | 7.02593 |
| 0   | 6.50295 |
| 0   | 6.40255 |
| 0   | 5.5532  |
| 0   | 7.24428 |
| 0   | 7.65185 |
| 0   | 5.33064 |
| 0   | 5.6737  |
| 0   | 5.47798 |
| 0   | 5.40866 |
| 0   | 5.54212 |
| 0   | 5.37152 |
| 0   | 6.62994 |
| 0   | 6.09416 |
| 0   | 5.38642 |
| 0   | 6.24589 |
| 0   | 7.50645 |
| 0   | 5.3177  |
| 0   | 5.36661 |
| 0.5 | 11.2927 |
| 0   | 5.39876 |
| 0   | 5.55563 |
| 0   | 6.23292 |

|   |         |
|---|---------|
| 0 | 11.1237 |
| 0 | 9.10668 |
| 0 | 5.47892 |
| 0 | 5.80464 |
| 0 | 6.70927 |
| 0 | 5.25699 |
| 0 | 5.64581 |
| 0 | 7.30518 |
| 0 | 5.28792 |
| 0 | 5.52509 |
| 0 | 5.44436 |
| 0 | 7.66317 |
| 0 | 6.06686 |
| 0 | 6.11233 |
| 0 | 5.60701 |
| 0 | 5.33244 |
| 0 | 5.45283 |
| 0 | 5.45283 |
| 0 | 6.05038 |
| 0 | 5.39234 |
| 0 | 5.39234 |
| 0 | 6.20193 |
| 0 | 7.15214 |
| 0 | 7.34892 |
| 0 | 6.25218 |
| 0 | 8.02793 |
| 0 | 5.99942 |
| 0 | 8.02635 |
| 0 | 5.73515 |
| 0 | 5.24479 |
| 0 | 6.0928  |
| 0 | 5.54931 |
| 0 | 7.16833 |
| 0 | 5.84569 |
| 0 | 5.59315 |
| 0 | 5.37365 |
| 0 | 5.45428 |
| 0 | 5.397   |
| 0 | 6.0627  |
| 0 | 5.79472 |
| 0 | 5.46692 |
| 0 | 5.63986 |
| 0 | 6.55786 |
| 0 | 5.81206 |
| 0 | 5.43738 |
| 0 | 5.40094 |
| 0 | 5.27269 |

|   |         |
|---|---------|
| 0 | 7.45449 |
| 0 | 8.30282 |
| 0 | 5.59371 |
| 0 | 7.33868 |
| 0 | 5.31553 |
| 0 | 6.20252 |
| 0 | 6.20252 |
| 0 | 6.93793 |
| 0 | 6.93793 |
| 0 | 7.08494 |
| 0 | 6.75764 |
| 0 | 5.23227 |
| 0 | 7.05904 |
| 0 | 5.23503 |
| 0 | 7.12155 |
| 0 | 7.23942 |
| 0 | 6.27223 |
| 0 | 5.91995 |
| 0 | 5.27621 |
| 0 | 7.77046 |
| 0 | 6.38351 |
| 0 | 8.22007 |
| 0 | 5.3227  |
| 0 | 6.26383 |
| 0 | 5.68939 |
| 0 | 5.62066 |
| 0 | 5.33673 |
| 0 | 5.44438 |
| 0 | 5.53026 |
| 0 | 5.67165 |
| 0 | 5.23741 |
| 0 | 6.16989 |
| 0 | 5.23866 |
| 0 | 9.05038 |
| 0 | 7.62139 |
| 0 | 6.5434  |
| 0 | 5.60021 |
| 0 | 6.17199 |
| 0 | 6.11809 |
| 0 | 7.20022 |
| 0 | 5.25054 |
| 0 | 16.7214 |
| 0 | 6.03382 |
| 0 | 5.44765 |
| 0 | 5.35683 |
| 0 | 5.53995 |
| 0 | 6.29142 |

|          |         |
|----------|---------|
| 0        | 6.30535 |
| 0        | 5.3667  |
| 0        | 6.2388  |
| 0        | 8.91733 |
| 0        | 5.65291 |
| 0        | 6.4458  |
| 0        | 7.30414 |
| 0        | 5.77719 |
| 0        | 6.38025 |
| 0        | 5.49697 |
| 0        | 5.49273 |
| 0        | 5.63785 |
| 0        | 6.21965 |
| 0        | 5.24758 |
| 0        | 5.2767  |
| 0        | 5.23691 |
| 0        | 7.75643 |
| 0        | 5.32185 |
| 0        | 8.22622 |
| 0        | 6.16353 |
| 0        | 5.37788 |
| 0        | 5.6136  |
| 0        | 8.62168 |
| 0        | 5.30449 |
| 0        | 6.06753 |
| 0        | 6.00815 |
| 0        | 5.59274 |
| 0        | 8.55823 |
| 0        | 5.33348 |
| 0        | 7.02407 |
| 0        | 10.6512 |
| 0        | 5.31715 |
| 0.571429 | 6.31564 |
| 0        | 5.57891 |
| 0        | 5.59408 |
| 0        | 5.78112 |
| 0        | 5.60845 |
| 0        | 7.37974 |
| 0        | 5.55285 |
| 0        | 6.10028 |
| 0        | 6.00833 |
| 0        | 5.39508 |
| 0        | 5.64472 |
| 0        | 5.53559 |
| 0        | 6.41492 |
| 0        | 8.43466 |
| 0        | 5.34026 |

|   |         |
|---|---------|
| 0 | 5.38513 |
| 0 | 5.38569 |
| 0 | 6.96003 |
| 0 | 7.26673 |
| 0 | 6.35522 |
| 0 | 6.14546 |
| 0 | 6.04179 |
| 0 | 6.04179 |
| 0 | 6.40292 |
| 0 | 6.01524 |
| 0 | 5.70279 |
| 0 | 8.28963 |
| 0 | 5.4585  |
| 0 | 5.38532 |
| 0 | 8.04524 |
| 0 | 6.00069 |
| 0 | 6.57183 |
| 0 | 5.66739 |
| 0 | 7.1032  |
| 0 | 5.33599 |
| 0 | 5.33263 |
| 0 | 5.78449 |
| 0 | 5.46537 |
| 0 | 5.38889 |
| 0 | 6.22263 |
| 0 | 5.40117 |
| 0 | 8.26514 |
| 0 | 6.35284 |
| 0 | 8.1803  |
| 0 | 7.28043 |
| 0 | 7.02188 |
| 0 | 7.027   |
| 0 | 6.24382 |
| 0 | 5.5678  |
| 0 | 6.34458 |
| 0 | 5.7476  |
| 0 | 5.37199 |
| 0 | 5.60106 |
| 0 | 5.5053  |
| 0 | 5.5859  |
| 0 | 6.17698 |
| 0 | 9.08613 |
| 0 | 5.46771 |
| 0 | 5.46771 |
| 0 | 6.08622 |
| 0 | 5.66457 |
| 0 | 6.0451  |

|   |         |
|---|---------|
| 0 | 6.0451  |
| 0 | 5.3232  |
| 0 | 5.25608 |
| 0 | 5.43057 |
| 0 | 5.43057 |
| 0 | 5.68674 |
| 0 | 7.40812 |
| 0 | 6.03603 |
| 0 | 8.25695 |
| 0 | 6.60982 |
| 0 | 5.24378 |
| 0 | 7.18353 |
| 0 | 6.65508 |
| 0 | 6.65508 |
| 0 | 5.45605 |
| 0 | 5.37685 |
| 0 | 6.41332 |
| 0 | 7.59934 |
| 0 | 5.42815 |
| 0 | 7.81718 |
| 0 | 6.18793 |
| 0 | 5.30841 |
| 0 | 5.30841 |
| 0 | 5.82159 |
| 0 | 5.35094 |
| 0 | 6.17842 |
| 0 | 5.6237  |
| 0 | 7.515   |
| 0 | 5.3721  |
| 0 | 5.3721  |
| 0 | 8.36028 |
| 0 | 5.34684 |
| 0 | 9.85885 |
| 0 | 6.14795 |
| 0 | 6.06974 |
| 0 | 9.14931 |
| 0 | 9.1776  |
| 0 | 5.41024 |
| 0 | 5.52284 |
| 0 | 5.48959 |
| 0 | 5.2921  |
| 0 | 5.2921  |
| 0 | 5.27498 |
| 0 | 7.50937 |
| 0 | 5.55541 |
| 0 | 5.39062 |
| 0 | 7.01389 |

|          |         |
|----------|---------|
| 0        | 16.1168 |
| 0        | 5.29314 |
| 0        | 5.53662 |
| 0        | 5.50215 |
| 0        | 6.32437 |
| 0        | 5.86362 |
| 0        | 6.02154 |
| 0        | 7.55417 |
| 0        | 7.09393 |
| 0        | 9.45686 |
| 0        | 5.51768 |
| 0        | 5.24347 |
| 0        | 5.32831 |
| 0        | 5.50371 |
| 0        | 7.00452 |
| 0        | 5.2529  |
| 0        | 6.07789 |
| 0        | 6.42049 |
| 0.333333 | 7.22713 |
| 0        | 5.2866  |
| 0        | 5.2866  |
| 0        | 5.38326 |
| 0        | 7.00187 |
| 0        | 7.00187 |
| 0        | 5.23752 |
| 0        | 6.7251  |
| 0        | 5.44754 |
| 0        | 5.70562 |
| 0        | 5.24688 |
| 0        | 5.52479 |
| 0        | 5.76296 |
| 0        | 6.1339  |
| 0        | 7.60271 |
| 0        | 5.28829 |
| 0        | 6.23321 |
| 0        | 7.12374 |
| 0        | 6.2419  |
| 0        | 5.81969 |
| 0        | 7.20842 |
| 0        | 5.25105 |
| 0        | 6.5643  |
| 0        | 6.21888 |
| 0        | 5.2452  |
| 0        | 8.12961 |
| 0        | 5.44398 |
| 0        | 5.35222 |
| 0        | 5.81422 |



|   |         |
|---|---------|
| 0 | 5.27712 |
| 0 | 5.27712 |
| 0 | 7.42485 |
| 0 | 7.42485 |
| 0 | 5.2842  |
| 0 | 8.13575 |
| 0 | 5.24136 |
| 0 | 6.09092 |
| 0 | 6.10044 |
| 0 | 6.24036 |
| 0 | 7.04762 |
| 0 | 5.60401 |
| 0 | 7.24112 |
| 0 | 5.59541 |
| 0 | 6.05638 |
| 0 | 8.76305 |
| 0 | 6.19406 |
| 0 | 6.55667 |
| 0 | 5.32759 |
| 0 | 5.39019 |
| 0 | 6.32412 |
| 0 | 5.89596 |
| 0 | 5.58757 |
| 0 | 5.38854 |
| 0 | 6.32088 |
| 0 | 6.058   |
| 0 | 5.45434 |
| 0 | 5.56164 |
| 0 | 5.47686 |
| 0 | 6.13595 |
| 0 | 8.00168 |
| 0 | 6.09896 |
| 0 | 5.67252 |
| 0 | 5.82716 |
| 0 | 5.82716 |
| 0 | 5.61438 |
| 0 | 5.61438 |
| 0 | 5.77062 |
| 0 | 5.25224 |
| 0 | 5.27836 |
| 0 | 6.04195 |
| 0 | 5.45947 |
| 0 | 5.60867 |
| 0 | 5.4645  |
| 0 | 5.2585  |
| 0 | 7.37669 |
| 0 | 5.41847 |

|   |         |
|---|---------|
| 0 | 6.2496  |
| 0 | 5.78361 |
| 0 | 5.24775 |
| 0 | 7.15234 |
| 0 | 6.08927 |
| 0 | 5.38752 |
| 0 | 5.38752 |
| 0 | 5.32722 |
| 0 | 9.11738 |
| 0 | 6.16718 |
| 0 | 7.44043 |
| 0 | 6.47842 |
| 0 | 6.36589 |
| 0 | 5.2382  |
| 0 | 7.91962 |
| 0 | 6.76579 |
| 0 | 7.60672 |
| 0 | 7.36012 |
| 0 | 5.89385 |
| 0 | 11.1478 |
| 0 | 5.69482 |
| 0 | 12.0199 |
| 0 | 6.02835 |
| 0 | 5.28705 |
| 0 | 6.05354 |
| 0 | 5.59624 |
| 0 | 8.2446  |
| 0 | 5.4086  |
| 0 | 5.36295 |
| 0 | 9.07511 |
| 0 | 6.11491 |
| 0 | 6.11491 |
| 0 | 5.74503 |
| 0 | 6.32826 |
| 0 | 5.24756 |
| 0 | 5.2901  |
| 0 | 5.55551 |
| 0 | 6.33206 |
| 0 | 5.26426 |
| 0 | 7.25558 |
| 0 | 5.25331 |
| 0 | 7.03309 |
| 0 | 5.48847 |
| 0 | 5.60289 |
| 0 | 6.81252 |
| 0 | 7.17254 |
| 0 | 5.98097 |

|   |         |
|---|---------|
| 0 | 6.54965 |
| 0 | 7.15441 |
| 0 | 5.32312 |
| 0 | 5.32312 |
| 0 | 7.35238 |
| 0 | 5.44335 |
| 0 | 7.07738 |
| 0 | 5.4581  |
| 0 | 6.26118 |
| 0 | 5.27508 |
| 0 | 7.88766 |
| 0 | 5.25512 |
| 0 | 7.22456 |
| 0 | 5.40473 |
| 0 | 6.22552 |
| 0 | 5.3576  |
| 0 | 5.615   |
| 0 | 7.39679 |
| 0 | 5.51062 |
| 0 | 8.30384 |
| 0 | 6.20502 |
| 0 | 7.44703 |
| 0 | 5.37826 |
| 0 | 5.31209 |
| 0 | 5.31209 |
| 0 | 5.27447 |
| 0 | 5.40096 |
| 0 | 5.35026 |
| 0 | 9.81209 |
| 0 | 5.39646 |
| 0 | 6.70932 |
| 0 | 5.35906 |
| 0 | 5.39984 |
| 0 | 5.26999 |
| 0 | 8.0445  |
| 0 | 6.04782 |
| 0 | 7.08826 |
| 0 | 7.94598 |
| 0 | 5.27236 |
| 0 | 5.38987 |
| 0 | 9.23366 |
| 0 | 5.4109  |
| 0 | 5.91401 |
| 0 | 5.3886  |
| 0 | 5.53747 |
| 0 | 6.82115 |
| 0 | 6.28599 |

|   |         |
|---|---------|
| 0 | 5.37681 |
| 0 | 5.62597 |
| 0 | 5.24801 |
| 0 | 6.08732 |
| 0 | 7.00317 |
| 0 | 6.63931 |
| 0 | 5.41525 |
| 0 | 5.69175 |
| 0 | 17.2296 |
| 0 | 6.00504 |
| 0 | 7.1381  |
| 0 | 5.88272 |
| 0 | 9.27656 |
| 0 | 5.53745 |
| 0 | 6.07011 |
| 0 | 5.61743 |
| 0 | 5.61743 |
| 0 | 6.01289 |
| 0 | 6.03878 |
| 0 | 5.56597 |
| 0 | 6.43401 |
| 0 | 5.47269 |
| 0 | 5.5113  |
| 0 | 5.36037 |
| 0 | 6.06471 |
| 0 | 5.31139 |
| 0 | 5.32879 |
| 0 | 5.39456 |
| 0 | 6.23774 |
| 0 | 6.2715  |
| 0 | 5.3075  |
| 0 | 5.23937 |
| 0 | 5.33885 |
| 0 | 6.39534 |
| 0 | 6.65183 |
| 0 | 9.31001 |
| 0 | 5.38755 |
| 0 | 5.63688 |
| 0 | 6.04182 |
| 0 | 5.47954 |
| 0 | 5.33424 |
| 0 | 5.37235 |
| 0 | 5.30404 |
| 0 | 6.13193 |
| 0 | 5.34207 |
| 0 | 6.4379  |
| 0 | 5.48825 |

|   |         |
|---|---------|
| 0 | 6.03788 |
| 0 | 5.52188 |
| 0 | 7.31397 |
| 0 | 6.63946 |
| 0 | 6.0878  |
| 0 | 5.7257  |
| 0 | 5.46439 |
| 0 | 9.19918 |
| 0 | 5.74786 |
| 0 | 7.18031 |
| 0 | 5.46855 |
| 0 | 8.21966 |
| 0 | 5.58829 |
| 0 | 5.35871 |
| 0 | 6.30773 |
| 0 | 5.70207 |
| 0 | 6.20017 |
| 0 | 5.71343 |
| 0 | 11.3934 |
| 0 | 5.44102 |
| 0 | 5.69413 |
| 0 | 7.17764 |
| 0 | 7.1559  |
| 0 | 5.34112 |
| 0 | 5.34112 |
| 0 | 5.29323 |
| 0 | 5.98474 |
| 0 | 8.3096  |
| 0 | 6.48915 |
| 0 | 5.23827 |
| 0 | 5.28915 |
| 0 | 6.52802 |
| 0 | 5.24914 |
| 0 | 5.28467 |
| 0 | 5.56148 |
| 0 | 5.25257 |
| 0 | 6.28111 |
| 0 | 6.22232 |
| 0 | 6.56899 |
| 0 | 5.75816 |
| 0 | 5.26269 |
| 0 | 7.09233 |
| 0 | 5.45426 |
| 0 | 5.34923 |
| 0 | 6.13877 |
| 0 | 5.32065 |
| 0 | 5.28526 |

|   |         |
|---|---------|
| 0 | 6.00962 |
| 0 | 6.2152  |
| 0 | 8.06083 |
| 0 | 5.32905 |
| 0 | 5.68617 |
| 0 | 6.3637  |
| 0 | 5.3463  |
| 0 | 12.0473 |
| 0 | 6.22552 |
| 0 | 5.28491 |
| 0 | 5.23633 |
| 0 | 8.54864 |
| 0 | 6.47411 |
| 0 | 6.07249 |
| 0 | 5.37961 |
| 0 | 5.24562 |
| 0 | 6.21148 |
| 0 | 5.66456 |
| 0 | 7.05808 |
| 0 | 7.05534 |
| 0 | 7.05534 |
| 0 | 6.11331 |
| 0 | 6.1245  |
| 0 | 6.28211 |
| 0 | 5.24215 |
| 0 | 5.66855 |
| 0 | 11.0798 |
| 0 | 5.4483  |
| 0 | 5.4483  |
| 0 | 5.43453 |
| 0 | 5.25259 |
| 0 | 5.27505 |
| 0 | 5.73146 |
| 0 | 6.18743 |
| 0 | 5.90933 |
| 0 | 5.33117 |
| 0 | 7.5054  |
| 0 | 6.38396 |
| 0 | 7.14621 |
| 0 | 5.36387 |
| 0 | 5.713   |
| 0 | 5.98019 |
| 0 | 7.06344 |
| 0 | 7.06344 |
| 0 | 5.50677 |
| 0 | 7.34055 |
| 0 | 7.02047 |

|   |         |
|---|---------|
| 0 | 5.27718 |
| 0 | 6.17126 |
| 0 | 6.04493 |
| 0 | 6.25601 |
| 0 | 6.53978 |
| 0 | 5.27495 |
| 0 | 7.15654 |
| 0 | 6.16165 |
| 0 | 5.25932 |
| 0 | 6.71159 |
| 0 | 6.39547 |
| 0 | 5.61938 |
| 0 | 5.92839 |
| 0 | 6.39049 |
| 0 | 5.7391  |
| 0 | 5.2503  |
| 0 | 5.647   |
| 0 | 5.40274 |
| 0 | 5.40274 |
| 0 | 5.34983 |
| 0 | 8.3038  |
| 0 | 7.07521 |
| 0 | 7.7158  |
| 0 | 7.62163 |
| 0 | 7.0519  |
| 0 | 5.62223 |
| 0 | 7.14638 |
| 0 | 6.61418 |
| 0 | 7.30879 |
| 0 | 5.51472 |
| 0 | 5.52491 |
| 0 | 7.69841 |
| 0 | 5.65121 |
| 0 | 5.2853  |
| 0 | 7.01929 |
| 0 | 5.35412 |
| 0 | 5.26316 |
| 0 | 5.5108  |
| 0 | 5.94882 |
| 0 | 5.66176 |
| 0 | 6.74594 |
| 0 | 5.42156 |
| 0 | 5.42156 |
| 0 | 10.0213 |
| 0 | 5.36251 |
| 0 | 6.03496 |
| 0 | 6.03496 |

|   |         |
|---|---------|
| 0 | 5.39567 |
| 0 | 6.28581 |
| 0 | 6.80143 |
| 0 | 7.37009 |
| 0 | 7.37009 |
| 0 | 5.3711  |
| 0 | 6.32938 |
| 0 | 6.22887 |
| 0 | 5.37225 |
| 0 | 6.20344 |
| 0 | 6.16501 |
| 0 | 5.45931 |
| 0 | 6.3089  |
| 0 | 5.96954 |
| 0 | 7.03232 |
| 0 | 5.37935 |
| 0 | 8.85878 |
| 0 | 6.84582 |
| 0 | 5.4403  |
| 0 | 5.35814 |
| 0 | 5.28874 |
| 0 | 5.33675 |
| 0 | 7.12715 |
| 0 | 5.41586 |
| 0 | 8.034   |
| 0 | 6.01345 |
| 0 | 7.71629 |
| 0 | 7.29693 |
| 0 | 6.2341  |
| 0 | 5.26784 |
| 0 | 5.27487 |
| 0 | 6.17601 |
| 0 | 7.33709 |
| 0 | 6.20799 |
| 0 | 6.05285 |
| 0 | 7.14308 |
| 0 | 5.68342 |
| 0 | 7.0441  |
| 0 | 5.54682 |
| 0 | 6.27228 |
| 0 | 6.15734 |
| 0 | 5.40152 |
| 0 | 5.54132 |
| 0 | 7.23231 |
| 0 | 5.25752 |
| 0 | 6.74    |
| 0 | 5.50906 |



|   |         |
|---|---------|
| 0 | 6.38521 |
| 0 | 5.94228 |
| 0 | 5.48211 |
| 0 | 7.54692 |
| 0 | 5.28301 |
| 0 | 6.48954 |
| 0 | 5.4812  |
| 0 | 7.96943 |
| 0 | 7.84136 |
| 0 | 7.84136 |
| 0 | 5.45965 |
| 0 | 5.75682 |
| 0 | 5.59578 |
| 0 | 5.60375 |
| 0 | 9.13447 |
| 0 | 7.60885 |
| 0 | 7.60885 |
| 0 | 5.82034 |
| 0 | 5.28113 |
| 0 | 5.6291  |
| 0 | 8.34061 |
| 0 | 8.34061 |
| 0 | 11.2531 |
| 0 | 5.40887 |
| 0 | 5.29912 |
| 0 | 5.87005 |
| 0 | 6.27131 |
| 0 | 5.29106 |
| 0 | 5.76898 |
| 0 | 6.77113 |
| 0 | 5.68524 |
| 0 | 7.0447  |
| 0 | 5.24488 |
| 0 | 6.38378 |
| 0 | 5.42651 |
| 0 | 5.31451 |
| 0 | 5.76618 |
| 0 | 5.74638 |
| 0 | 5.35163 |
| 0 | 6.29256 |
| 0 | 5.48592 |
| 0 | 6.74145 |
| 0 | 6.74145 |
| 0 | 7.53027 |
| 0 | 6.13201 |
| 0 | 5.31497 |
| 0 | 5.51114 |

|   |         |
|---|---------|
| 0 | 5.50747 |
| 0 | 5.98103 |
| 0 | 5.32309 |
| 0 | 6.58813 |
| 0 | 7.15867 |
| 0 | 6.26695 |
| 0 | 5.57295 |
| 0 | 5.42136 |
| 0 | 7.10878 |
| 0 | 6.72815 |
| 0 | 6.17267 |
| 0 | 6.30494 |
| 0 | 6.05336 |
| 0 | 5.40269 |
| 0 | 5.48854 |
| 0 | 6.2809  |
| 0 | 7.03632 |
| 0 | 5.44259 |
| 0 | 5.73477 |
| 0 | 5.73477 |
| 0 | 5.51163 |
| 0 | 6.15822 |
| 0 | 6.44995 |
| 0 | 6.06664 |
| 0 | 5.47202 |
| 0 | 6.49038 |
| 0 | 8.0207  |
| 0 | 5.27988 |
| 0 | 5.43371 |
| 0 | 5.7358  |
| 0 | 5.24622 |
| 0 | 5.55989 |
| 0 | 5.56067 |
| 0 | 7.3518  |
| 0 | 8.25653 |
| 0 | 7.06481 |
| 0 | 7.004   |
| 0 | 5.56833 |
| 0 | 5.56833 |
| 0 | 7.44282 |
| 0 | 5.34132 |
| 0 | 8.04684 |
| 0 | 5.27763 |
| 0 | 6.18493 |
| 0 | 5.89521 |
| 0 | 5.95385 |
| 0 | 10.567  |

|     |         |
|-----|---------|
| 0   | 5.46522 |
| 0   | 5.28026 |
| 0   | 5.28026 |
| 0   | 5.36505 |
| 0   | 5.8962  |
| 0.3 | 9.38753 |
| 0   | 5.56746 |
| 0   | 11.082  |
| 0   | 5.65473 |
| 0   | 5.43495 |
| 0   | 5.2863  |
| 0   | 6.59113 |
| 0   | 6.16187 |
| 0   | 6.44328 |
| 0   | 6.04759 |
| 0   | 5.31086 |
| 0   | 7.72045 |
| 0   | 6.2248  |
| 0   | 6.2248  |
| 0   | 5.32761 |
| 0   | 7.71171 |
| 0   | 5.28761 |
| 0   | 5.46229 |
| 0   | 5.75578 |
| 0   | 5.27214 |
| 0   | 5.29274 |
| 0   | 5.29274 |
| 0   | 5.32425 |
| 0   | 5.55101 |
| 0   | 6.17128 |
| 0   | 6.16056 |
| 0   | 5.61475 |
| 0   | 5.5496  |
| 0   | 5.4719  |
| 0   | 7.62024 |
| 0   | 6.4347  |
| 0   | 5.48298 |
| 0   | 5.35209 |
| 0   | 8.29441 |
| 0   | 5.58756 |
| 0   | 5.65176 |
| 0   | 5.26196 |
| 0   | 6.31087 |
| 0   | 7.08892 |
| 0   | 7.55932 |
| 0   | 7.00682 |
| 0   | 5.50307 |

|   |         |
|---|---------|
| 0 | 5.28653 |
| 0 | 6.24969 |
| 0 | 8.12523 |
| 0 | 6.2538  |
| 0 | 5.90752 |
| 0 | 6.08663 |
| 0 | 5.48661 |
| 0 | 5.3789  |
| 0 | 6.46573 |
| 0 | 7.12357 |
| 0 | 9.17345 |
| 0 | 5.26283 |
| 0 | 7.29764 |
| 0 | 5.27229 |
| 0 | 6.59009 |
| 0 | 5.65287 |
| 0 | 5.24541 |
| 0 | 5.50855 |
| 0 | 5.6441  |
| 0 | 5.29774 |
| 0 | 5.57915 |
| 0 | 5.65442 |
| 0 | 6.73472 |
| 0 | 8.95552 |
| 0 | 5.3689  |
| 0 | 6.01088 |
| 0 | 5.52416 |
| 0 | 6.14909 |
| 0 | 5.3675  |
| 0 | 7.29667 |
| 0 | 8.77533 |
| 0 | 5.99811 |
| 0 | 8.09335 |
| 0 | 8.09335 |
| 0 | 8.00581 |
| 0 | 6.28411 |
| 0 | 6.28411 |
| 0 | 8.70597 |
| 0 | 5.71951 |
| 0 | 7.66249 |
| 0 | 5.26636 |
| 0 | 6.08166 |
| 0 | 5.45521 |
| 0 | 5.235   |
| 0 | 6.05352 |
| 0 | 5.45004 |
| 0 | 6.4693  |

|   |         |
|---|---------|
| 0 | 5.50783 |
| 0 | 7.12226 |
| 0 | 6.82851 |
| 0 | 6.10065 |
| 0 | 5.2409  |
| 0 | 6.59039 |
| 0 | 5.47966 |
| 0 | 6.0909  |
| 0 | 6.07127 |
| 0 | 5.58933 |
| 0 | 5.60647 |
| 0 | 5.31255 |
| 0 | 5.29386 |
| 0 | 5.29386 |
| 0 | 5.80798 |
| 0 | 7.10554 |
| 0 | 7.29935 |
| 0 | 5.45911 |

## Gene List G4+/- H3K9me3 Control Diet

| chromosome | feature | start     | feature   | end          | feature | chromosome | region start | region end |
|------------|---------|-----------|-----------|--------------|---------|------------|--------------|------------|
|            | 1       | 194868193 | 194876865 | NM_181048    |         | chr1       | 194873923    | 194874524  |
|            | 1       | 192793029 | 192801528 | NM_030060    |         | chr1       | 192800338    | 192801211  |
|            | 1       | 187815599 | 187824098 | NM_146106    |         | chr1       | 187815617    | 187816091  |
|            | 1       | 181586585 | 181595084 | BC023122     |         | chr1       | 181589457    | 181590059  |
|            | 2       | 181519369 | 181534604 | NM_172676    |         | chr2       | 181521120    | 181521781  |
|            | 2       | 180379742 | 180392936 | NM_148933    |         | chr2       | 180380986    | 180381722  |
|            | 2       | 177433628 | 177446649 | BC124559     |         | chr2       | 177439597    | 177440280  |
|            | 1       | 175061368 | 175069889 | NM_010184    |         | chr1       | 175062295    | 175063426  |
|            | 1       | 174965412 | 174973911 | NM_146764    |         | chr1       | 174967043    | 174968028  |
|            | 1       | 174787443 | 174795942 | NM_008763    |         | chr1       | 174789118    | 174790161  |
|            | 1       | 174330722 | 174344293 | NM_178598    |         | chr1       | 174335651    | 174336237  |
|            | 2       | 173987164 | 173995663 | AF085738     |         | chr2       | 173991306    | 173992041  |
|            | 2       | 173964707 | 173975778 | BC062654     |         | chr2       | 173969546    | 173970485  |
|            | 2       | 165844346 | 165852868 | NM_028072    |         | chr2       | 165846305    | 165847009  |
| X          |         | 165317556 | 165326055 | BC059027     |         | chrX       | 165324653    | 165325812  |
| X          |         | 165317556 | 165326055 | BC059027     |         | chrX       | 165323322    | 165324254  |
| X          |         | 164527484 | 164537314 | NM_009666    |         | chrX       | 164534573    | 164535285  |
|            | 1       | 164048300 | 164056799 | AB159607     |         | chr1       | 164055797    | 164056603  |
|            | 2       | 164045216 | 164056855 | NM_011414    |         | chr2       | 164052145    | 164052875  |
|            | 2       | 163232629 | 163241128 | NM_008261    |         | chr2       | 163235383    | 163236247  |
|            | 1       | 163085312 | 163093843 | NM_007453    |         | chr1       | 163089819    | 163090415  |
|            | 2       | 157109730 | 157118246 | NM_009271    |         | chr2       | 157113843    | 157114431  |
| X          |         | 156455298 | 156470872 | AF285577     |         | chrX       | 156466637    | 156467285  |
| X          |         | 156455298 | 156470872 | AF285577     |         | chrX       | 156459542    | 156460341  |
|            | 1       | 155092450 | 155101004 | NM_010683    |         | chr1       | 155094427    | 155095038  |
|            | 2       | 153603671 | 153612170 | NM_194357    |         | chr2       | 153603668    | 153604490  |
|            | 4       | 150830268 | 150845979 | NM_172705    |         | chr4       | 150835899    | 150836600  |
|            | 2       | 148080783 | 148089282 | NM_009219    |         | chr2       | 148087472    | 148088361  |
|            | 2       | 147050501 | 147059000 | NM_008780    |         | chr2       | 147055452    | 147056185  |
|            | 4       | 146456730 | 146465229 | NM_145078    |         | chr4       | 146460206    | 146461334  |
|            | 4       | 146391107 | 146399606 | NM_001014397 |         | chr4       | 146397298    | 146398118  |
|            | 4       | 146391107 | 146399606 | NM_001014397 |         | chr4       | 146396173    | 146396988  |
|            | 3       | 146094920 | 146103419 | BC029847     |         | chr3       | 146097595    | 146098223  |
|            | 4       | 145890306 | 145898805 | NM_009051    |         | chr4       | 145897324    | 145898033  |
|            | 4       | 145809847 | 145818346 | AF051348     |         | chr4       | 145811963    | 145812757  |
|            | 4       | 145528370 | 145536936 | NM_001037926 |         | chr4       | 145533385    | 145534302  |
|            | 4       | 145528370 | 145536936 | NM_001037926 |         | chr4       | 145530885    | 145531422  |
|            | 5       | 145452089 | 145461269 | NM_016683    |         | chr5       | 145454447    | 145455116  |
|            | 5       | 145452828 | 145461409 | NM_023322    |         | chr5       | 145454447    | 145455116  |
|            | 4       | 144931384 | 144939883 | BC096593     |         | chr4       | 144936517    | 144937106  |
| X          |         | 144929317 | 144937816 | NM_001037716 |         | chrX       | 144935209    | 144936051  |
|            | 4       | 144931384 | 144939883 | BC096593     |         | chr4       | 144933497    | 144934251  |
|            | 4       | 143544654 | 143553153 | BC052827     |         | chr4       | 143551397    | 143552284  |
|            | 4       | 143451416 | 143459915 | NM_198661    |         | chr4       | 143452314    | 143452908  |

|   |    |           |           |              |       |           |           |
|---|----|-----------|-----------|--------------|-------|-----------|-----------|
|   | 7  | 142910644 | 142919337 | NM_008434    | chr7  | 142911390 | 142911977 |
|   | 5  | 142710405 | 142718972 | NM_172725    | chr5  | 142717460 | 142718051 |
|   | 6  | 142526032 | 142534581 | NM_008428    | chr6  | 142533513 | 142534104 |
|   | 7  | 142383906 | 142392849 | BC025150     | chr7  | 142389400 | 142390538 |
|   | 6  | 141816078 | 141824577 | NM_030687    | chr6  | 141817488 | 141818107 |
|   | 7  | 141594511 | 141603010 | NM_010844    | chr7  | 141598309 | 141598992 |
|   | 7  | 141184276 | 141192821 | NM_133191    | chr7  | 141188444 | 141189163 |
|   | 7  | 141187582 | 141196081 | BC046399     | chr7  | 141188444 | 141189163 |
|   | 4  | 140409373 | 140417872 | NM_001025608 | chr4  | 140413962 | 140414593 |
|   | 4  | 140414007 | 140422506 | NM_172518    | chr4  | 140413962 | 140414593 |
|   | 7  | 140194808 | 140203307 | NM_146955    | chr7  | 140197446 | 140198525 |
|   | 4  | 139966617 | 139976125 | NM_173867    | chr4  | 139967490 | 139968116 |
|   | 5  | 139791551 | 139800077 | NM_013702    | chr5  | 139792295 | 139792913 |
|   | 5  | 138846664 | 138855181 | NM_183025    | chr5  | 138846995 | 138847605 |
|   | 5  | 138847016 | 138855531 | NM_013844    | chr5  | 138846995 | 138847605 |
|   | 1  | 137772887 | 137785660 | BC107028     | chr1  | 137777723 | 137778351 |
|   | 6  | 137693320 | 137701821 | NM_011499    | chr6  | 137699255 | 137699877 |
|   | 5  | 137398325 | 137406834 | NM_201373    | chr5  | 137398742 | 137399633 |
|   | 6  | 136819218 | 136827796 | NM_026639    | chr6  | 136820809 | 136821662 |
|   | 4  | 135577048 | 135585551 | NM_028871    | chr4  | 135583963 | 135584666 |
| X |    | 135403243 | 135411745 | NM_177921    | chrX  | 135409254 | 135409943 |
|   | 1  | 135249081 | 135257580 | BC007130     | chr1  | 135253478 | 135254107 |
|   | 4  | 134667798 | 134681630 | NM_145555    | chr4  | 134674906 | 134675588 |
|   | 6  | 133726269 | 133739088 | AB256662     | chr6  | 133730899 | 133731700 |
|   | 6  | 132921038 | 132929537 | NM_207030    | chr6  | 132924660 | 132925426 |
| X |    | 132911913 | 132920462 | NM_030688    | chrX  | 132915145 | 132915734 |
|   | 2  | 132607562 | 132616061 | BC029093     | chr2  | 132609484 | 132610353 |
|   | 2  | 132532107 | 132541674 | NM_001024385 | chr2  | 132537930 | 132538622 |
| X |    | 132163140 | 132171699 | NM_011123    | chrX  | 132170961 | 132171583 |
|   | 2  | 132074342 | 132082841 | NM_144944    | chr2  | 132082062 | 132082671 |
|   | 6  | 131642080 | 131661756 | NM_207019    | chr6  | 131654443 | 131655431 |
| X |    | 131373731 | 131382251 | NM_029541    | chrX  | 131374850 | 131375308 |
|   | 3  | 131289883 | 131298382 | NM_027816    | chr3  | 131297585 | 131298147 |
|   | 8  | 131239328 | 131247882 | NM_008737    | chr8  | 131242099 | 131242693 |
|   | 2  | 130919508 | 130932675 | NM_144888    | chr2  | 130927574 | 130928147 |
| X |    | 130521479 | 130529978 | BC115763     | chrX  | 130521144 | 130521747 |
|   | 6  | 130299015 | 130309319 | NM_010648    | chr6  | 130307839 | 130308504 |
|   | 2  | 129880635 | 129889134 | NM_138655    | chr2  | 129882918 | 129883290 |
|   | 3  | 129744830 | 129753338 | NM_010113    | chr3  | 129746433 | 129747051 |
|   | 4  | 129638007 | 129647466 | NM_198959    | chr4  | 129639680 | 129640294 |
|   | 10 | 129611599 | 129620098 | NM_146300    | chr10 | 129617231 | 129617681 |
|   | 6  | 129551475 | 129561680 | NM_010654    | chr6  | 129556814 | 129557789 |
|   | 10 | 129527505 | 129536004 | NM_146674    | chr10 | 129530661 | 129531613 |
|   | 6  | 129470348 | 129478847 | NM_138648    | chr6  | 129476091 | 129476652 |
|   | 6  | 129472597 | 129481096 | BC120661     | chr6  | 129476091 | 129476652 |
|   | 10 | 128923178 | 128931677 | NM_146930    | chr10 | 128924281 | 128924927 |
|   | 6  | 128751622 | 128760214 | NM_008527    | chr6  | 128754841 | 128755517 |

|    |           |           |              |       |           |           |
|----|-----------|-----------|--------------|-------|-----------|-----------|
| 5  | 128744724 | 128753770 | NM_172885    | chr5  | 128750651 | 128751251 |
| 10 | 128512961 | 128521460 | NM_146267    | chr10 | 128519986 | 128520924 |
| 10 | 128512961 | 128521460 | NM_146267    | chr10 | 128515594 | 128516279 |
| 6  | 127731849 | 127740366 | NM_201371    | chr6  | 127735495 | 127736092 |
| 7  | 127531923 | 127540422 | NM_172748    | chr7  | 127535923 | 127536746 |
| 10 | 127198103 | 127206632 | NM_009040    | chr10 | 127199031 | 127199705 |
| 4  | 126852273 | 126866468 | NM_010291    | chr4  | 126854811 | 126855230 |
| 2  | 126403486 | 126411985 | AF057146     | chr2  | 126409377 | 126410024 |
| 6  | 125276969 | 125285473 | NM_010736    | chr6  | 125285310 | 125286405 |
| 6  | 125281329 | 125289971 | NM_011324    | chr6  | 125285310 | 125286405 |
| 2  | 124753568 | 124762107 | NM_175034    | chr2  | 124758016 | 124759013 |
| 4  | 124627645 | 124636144 | NM_153159    | chr4  | 124628458 | 124629448 |
| 4  | 124482734 | 124491233 | NM_138683    | chr4  | 124490470 | 124491073 |
| 4  | 124153956 | 124162455 | NM_011141    | chr4  | 124156211 | 124156586 |
| 9  | 123525031 | 123533543 | NM_139142    | chr9  | 123532721 | 123533377 |
| 8  | 123517860 | 123526359 | NM_197988    | chr8  | 123518449 | 123519348 |
| 4  | 122779214 | 122788166 | NM_130881    | chr4  | 122785625 | 122786307 |
| 7  | 122755967 | 122764574 | NM_175023    | chr7  | 122761580 | 122762185 |
| 9  | 122699594 | 122708093 | BC055684     | chr9  | 122700552 | 122701484 |
| 11 | 121640351 | 121648892 | AB235902     | chr11 | 121646487 | 121647294 |
| 14 | 121583796 | 121592295 | NM_177817    | chr14 | 121590353 | 121591398 |
| 9  | 121551158 | 121559727 | NM_178677    | chr9  | 121558456 | 121559304 |
| 9  | 121553084 | 121561586 | NM_026794    | chr9  | 121558456 | 121559304 |
| 9  | 121430698 | 121439197 | AY572449     | chr9  | 121437790 | 121438474 |
| 11 | 120970361 | 120978881 | NM_145440    | chr11 | 120971702 | 120972499 |
| 11 | 120852998 | 120861508 | NM_009854    | chr11 | 120859508 | 120859895 |
| 5  | 120843633 | 120852145 | NM_029408    | chr5  | 120848399 | 120849126 |
| 5  | 120846731 | 120855266 | NM_145853    | chr5  | 120848399 | 120849126 |
| 11 | 120572884 | 120581416 | BC013455     | chr11 | 120577912 | 120578530 |
| 6  | 120456927 | 120465578 | NM_033567    | chr6  | 120463228 | 120464167 |
| 7  | 120458900 | 120467492 | NM_001040136 | chr7  | 120462782 | 120463447 |
| 7  | 120462895 | 120471394 | BC030336     | chr7  | 120462782 | 120463447 |
| 6  | 120317175 | 120328979 | NM_026028    | chr6  | 120328968 | 120329903 |
| 6  | 120324077 | 120332576 | BC010717     | chr6  | 120328968 | 120329903 |
| 9  | 120146771 | 120155270 | NM_144557    | chr9  | 120148146 | 120149015 |
| 7  | 119525075 | 119533724 | U53456       | chr7  | 119531989 | 119532703 |
| 7  | 119475239 | 119483738 | NM_178414    | chr7  | 119482992 | 119483719 |
| 7  | 119311414 | 119319989 | BC095985     | chr7  | 119317598 | 119318194 |
| 2  | 118853229 | 118868449 | NM_001039223 | chr2  | 118852923 | 118853791 |
| 7  | 118644252 | 118653408 | NM_023197    | chr7  | 118643998 | 118644774 |
| 2  | 118611965 | 118620520 | NM_028117    | chr2  | 118619253 | 118619935 |
| 4  | 118177646 | 118194395 | NM_146713    | chr4  | 118188852 | 118189547 |
| 11 | 118168897 | 118177596 | NM_011594    | chr11 | 118170339 | 118171189 |
| 9  | 117098122 | 117107180 | NM_178660    | chr9  | 117098890 | 117099689 |
| 4  | 116992348 | 117000847 | NM_025739    | chr4  | 116997779 | 116998372 |
| 4  | 116212898 | 116221408 | NM_146151    | chr4  | 116218339 | 116218987 |
| 12 | 115953327 | 115961826 | BC110689     | chr12 | 115956014 | 115956887 |



|    |           |           |              |       |           |           |
|----|-----------|-----------|--------------|-------|-----------|-----------|
| 9  | 115887287 | 115895791 | BC053377     | chr9  | 115890904 | 115891515 |
| 11 | 115817345 | 115825844 | BC080751     | chr11 | 115820405 | 115820987 |
| 6  | 115705509 | 115714008 | NM_144805    | chr6  | 115710711 | 115711327 |
| 12 | 115604181 | 115612680 | BC103785     | chr12 | 115608516 | 115609155 |
| 11 | 115417497 | 115425996 | NM_173048    | chr11 | 115422998 | 115423636 |
| 6  | 115320570 | 115329262 | U01841       | chr6  | 115327188 | 115327785 |
| 6  | 113943861 | 113952360 | AF053471     | chr6  | 113944520 | 113945228 |
| 2  | 113702561 | 113711060 | NM_010290    | chr2  | 113705704 | 113706296 |
| 12 | 113250783 | 113259624 | NM_145450    | chr12 | 113252416 | 113253089 |
| 13 | 112876542 | 112885041 | L13103       | chr13 | 112876823 | 112877456 |
| 8  | 112848798 | 112857301 | NM_028584    | chr8  | 112851316 | 112852097 |
| 6  | 112419278 | 112427967 | NM_007617    | chr6  | 112424930 | 112425566 |
| 2  | 112249864 | 112266176 | NM_133749    | chr2  | 112254998 | 112255980 |
| 12 | 111424293 | 111432847 | NM_175207    | chr12 | 111431515 | 111432187 |
| 2  | 111243981 | 111252480 | NM_001011773 | chr2  | 111247621 | 111248201 |
| 9  | 111213636 | 111222135 | BC086653     | chr9  | 111214497 | 111215398 |
| 2  | 111163430 | 111171929 | NM_207236    | chr2  | 111169091 | 111170193 |
| 2  | 111051956 | 111060455 | NM_146395    | chr2  | 111057767 | 111058507 |
| 10 | 110898849 | 110913332 | NM_009344    | chr10 | 110904388 | 110904987 |
| 8  | 110475060 | 110483611 | NM_010817    | chr8  | 110482095 | 110482713 |
| 7  | 110403574 | 110412073 | BC067204     | chr7  | 110410182 | 110410798 |
| 9  | 109668033 | 109676550 | NM_183136    | chr9  | 109672400 | 109673287 |
| 1  | 109411562 | 109420117 | NM_011459    | chr1  | 109417742 | 109418338 |
| 12 | 109281057 | 109289683 | NM_181328    | chr12 | 109283680 | 109284261 |
| 1  | 109183861 | 109199422 | NM_025867    | chr1  | 109191555 | 109192307 |
| 8  | 108894636 | 108907450 | NM_025518    | chr8  | 108897383 | 108898330 |
| 8  | 108898116 | 108906615 | NM_028038    | chr8  | 108897383 | 108898330 |
| 12 | 108748077 | 108756576 | BC113163     | chr12 | 108751918 | 108752507 |
| 12 | 108621650 | 108630149 | NM_009832    | chr12 | 108626974 | 108628043 |
| 12 | 108624522 | 108633070 | NM_028262    | chr12 | 108626974 | 108628043 |
| 7  | 108540035 | 108548534 | NM_146723    | chr7  | 108546931 | 108547532 |
| 3  | 108541051 | 108549550 | NM_017392    | chr3  | 108542291 | 108543093 |
| 10 | 108412230 | 108421063 | NM_009306    | chr10 | 108414280 | 108414969 |
| 7  | 108329704 | 108338203 | NM_001011527 | chr7  | 108331907 | 108332590 |
| 7  | 108312645 | 108321144 | NM_146739    | chr7  | 108318948 | 108319567 |
| 7  | 108207750 | 108216249 | NM_146738    | chr7  | 108214017 | 108214829 |
| 7  | 108207750 | 108216249 | NM_146738    | chr7  | 108208516 | 108209148 |
| 9  | 108191368 | 108199883 | NM_008160    | chr9  | 108197530 | 108198713 |
| 8  | 108180792 | 108197237 | NM_172760    | chr8  | 108191320 | 108191916 |
| 7  | 108102073 | 108110572 | NM_146736    | chr7  | 108108207 | 108108801 |
| 7  | 107948549 | 107957048 | NM_001011810 | chr7  | 107948583 | 107949170 |
| 8  | 107928293 | 107940242 | BC057188     | chr8  | 107932564 | 107933339 |
| 7  | 107884246 | 107892745 | NM_146733    | chr7  | 107885771 | 107886731 |
| 8  | 107844869 | 107853368 | NM_197999    | chr8  | 107851267 | 107851875 |
| 3  | 107643575 | 107652074 | NM_172271    | chr3  | 107648015 | 107648806 |
| 7  | 107612145 | 107620644 | NM_146426    | chr7  | 107613706 | 107614530 |
| 9  | 107522971 | 107533069 | NM_023805    | chr9  | 107525766 | 107526372 |

|   |    |           |           |              |       |           |           |
|---|----|-----------|-----------|--------------|-------|-----------|-----------|
|   | 4  | 106745830 | 106754365 | NM_028394    | chr4  | 106748719 | 106749477 |
|   | 4  | 106748870 | 106757465 | NM_029985    | chr4  | 106748719 | 106749477 |
|   | 7  | 106665393 | 106673892 | NM_147032    | chr7  | 106671441 | 106672129 |
|   | 7  | 106615766 | 106624265 | NM_146597    | chr7  | 106621548 | 106622169 |
|   | 4  | 106225838 | 106234346 | NM_146149    | chr4  | 106231703 | 106232300 |
|   | 7  | 105607813 | 105636302 | NM_009906    | chr7  | 105629903 | 105630537 |
|   | 7  | 105052633 | 105061132 | NM_001011857 | chr7  | 105053158 | 105053951 |
|   | 7  | 104924069 | 104932568 | NM_146358    | chr7  | 104926729 | 104927344 |
|   | 7  | 104788616 | 104805583 | NM_147060    | chr7  | 104796421 | 104797019 |
|   | 7  | 104788616 | 104805583 | NM_147060    | chr7  | 104791163 | 104792055 |
|   | 7  | 104724830 | 104733335 | NM_007887    | chr7  | 104728692 | 104729445 |
|   | 7  | 104538525 | 104555038 | NM_147050    | chr7  | 104546074 | 104546675 |
|   | 7  | 104518627 | 104527126 | NM_147049    | chr7  | 104522441 | 104523270 |
|   | 7  | 104432044 | 104440543 | NM_147048    | chr7  | 104438150 | 104438964 |
|   | 5  | 104215167 | 104223666 | NM_198030    | chr5  | 104222698 | 104223296 |
|   | 9  | 104193514 | 104202067 | NM_207668    | chr9  | 104196341 | 104197006 |
|   | 7  | 103907619 | 103916118 | NM_147072    | chr7  | 103913718 | 103914421 |
|   | 3  | 103859115 | 103873062 | NM_133859    | chr3  | 103860237 | 103860858 |
|   | 7  | 103846997 | 103855496 | NM_147118    | chr7  | 103847012 | 103847924 |
|   | 3  | 103698342 | 103707711 | NM_018800    | chr3  | 103700414 | 103701211 |
|   | 7  | 103123827 | 103132348 | NM_001001559 | chr7  | 103125168 | 103125524 |
|   | 9  | 102938260 | 102946759 | BC024728     | chr9  | 102942592 | 102943419 |
|   | 11 | 102915193 | 102923716 | NM_152813    | chr11 | 102915420 | 102916034 |
|   | 2  | 102868514 | 102877070 | NM_019735    | chr2  | 102869710 | 102870162 |
|   | 7  | 102826942 | 102835441 | NM_147114    | chr7  | 102832195 | 102832691 |
|   | 7  | 102826942 | 102835441 | NM_147114    | chr7  | 102831115 | 102831747 |
|   | 15 | 102758791 | 102767290 | NM_010463    | chr15 | 102763881 | 102764593 |
|   | 7  | 102759473 | 102767972 | NM_147088    | chr7  | 102760957 | 102761567 |
| X |    | 102685448 | 102693993 | NM_001007580 | chrX  | 102689333 | 102690206 |
|   | 9  | 102476144 | 102488074 | NM_181394    | chr9  | 102482710 | 102483315 |
|   | 9  | 102461162 | 102469661 | BC048718     | chr9  | 102461837 | 102462325 |
|   | 7  | 102436744 | 102448775 | NM_009277    | chr7  | 102442101 | 102442712 |
|   | 13 | 102044663 | 102053168 | BC012687     | chr13 | 102045399 | 102046201 |
|   | 15 | 101376194 | 101384701 | NM_053249    | chr15 | 101380075 | 101380706 |
|   | 12 | 101174156 | 101189691 | NM_145448    | chr12 | 101186645 | 101187283 |
|   | 15 | 100554911 | 100564885 | NM_172451    | chr15 | 100556229 | 100556870 |
|   | 11 | 100211330 | 100219833 | NM_010593    | chr11 | 100215198 | 100216128 |
| X |    | 100181468 | 100190003 | NM_011276    | chrX  | 100186547 | 100187200 |
| X |    | 100160948 | 100175393 | AF197105     | chrX  | 100163168 | 100164223 |
|   | 13 | 99734991  | 99743495  | NM_026685    | chr13 | 99737043  | 99737755  |
|   | 6  | 99689325  | 99697855  | NM_015768    | chr6  | 99692670  | 99693456  |
|   | 6  | 99652142  | 99660641  | NM_008158    | chr6  | 99656688  | 99657544  |
| X |    | 99456826  | 99465333  | NM_029170    | chrX  | 99464341  | 99464941  |
|   | 4  | 99142317  | 99150816  | NM_010425    | chr4  | 99146001  | 99146605  |
|   | 3  | 98984756  | 98994855  | NM_008293    | chr3  | 98985636  | 98986334  |
|   | 12 | 98663707  | 98678575  | NM_008152    | chr12 | 98677426  | 98677928  |
|   | 13 | 98588956  | 98597455  | BC054101     | chr13 | 98594971  | 98595498  |

|   |    |          |          |              |       |          |          |
|---|----|----------|----------|--------------|-------|----------|----------|
|   | 5  | 98563606 | 98572105 | NM_001024614 | chr5  | 98567085 | 98567714 |
|   | 16 | 98075014 | 98083537 | NM_174847    | chr16 | 98081795 | 98082538 |
| X |    | 97482743 | 97491242 | BC057085     | chrX  | 97487795 | 97488472 |
|   | 7  | 97386814 | 97395313 | BC013813     | chr7  | 97391955 | 97392518 |
|   | 4  | 97258690 | 97272444 | NM_010905    | chr4  | 97267768 | 97268520 |
|   | 3  | 97238188 | 97246941 | NM_019800    | chr3  | 97243804 | 97244407 |
| X |    | 96794779 | 96803588 | NM_020621    | chrX  | 96801090 | 96801684 |
|   | 16 | 96379942 | 96388441 | NM_033149    | chr16 | 96379904 | 96380545 |
|   | 11 | 96109164 | 96122181 | NM_008268    | chr11 | 96110060 | 96110675 |
|   | 8  | 95843207 | 95852857 | NM_009209    | chr8  | 95848867 | 95849580 |
|   | 3  | 95738192 | 95746712 | NM_008562    | chr3  | 95746165 | 95746669 |
|   | 5  | 95707855 | 95724394 | BC099941     | chr5  | 95723784 | 95724384 |
|   | 8  | 95240877 | 95249630 | NM_018826    | chr8  | 95244284 | 95244886 |
|   | 1  | 94412738 | 94429426 | NM_146490    | chr1  | 94419749 | 94420344 |
|   | 1  | 94301665 | 94317025 | NM_024197    | chr1  | 94314104 | 94315058 |
|   | 4  | 94100562 | 94109088 | BC049156     | chr4  | 94105859 | 94106553 |
|   | 8  | 93712942 | 93721441 | NM_177224    | chr8  | 93714025 | 93714639 |
|   | 1  | 93364971 | 93373985 | NM_001039126 | chr1  | 93369725 | 93370682 |
|   | 3  | 92540521 | 92549020 | NM_011478    | chr3  | 92547672 | 92548287 |
|   | 3  | 92521676 | 92530182 | NM_009265    | chr3  | 92521712 | 92522335 |
|   | 16 | 92207801 | 92216300 | NM_029252    | chr16 | 92209215 | 92209929 |
|   | 3  | 92094539 | 92103038 | NM_207247    | chr3  | 92099224 | 92100045 |
|   | 6  | 91938382 | 91955113 | NM_172731    | chr6  | 91948355 | 91948937 |
|   | 4  | 91296085 | 91304592 | BC033506     | chr4  | 91297373 | 91298044 |
|   | 16 | 90621183 | 90629910 | NM_029844    | chr16 | 90626643 | 90627381 |
|   | 5  | 90530461 | 90538964 | NM_008096    | chr5  | 90537498 | 90538100 |
|   | 1  | 90232190 | 90240763 | NM_029269    | chr1  | 90234709 | 90235304 |
|   | 16 | 90170668 | 90179284 | NM_178923    | chr16 | 90176717 | 90177318 |
|   | 6  | 90138220 | 90146719 | NM_053222    | chr6  | 90144044 | 90144720 |
|   | 6  | 89999846 | 90008345 | NM_053218    | chr6  | 90001799 | 90002471 |
|   | 6  | 89981392 | 89989891 | NM_053219    | chr6  | 89987200 | 89988083 |
|   | 16 | 89847187 | 89855686 | NM_009384    | chr16 | 89849370 | 89850156 |
|   | 1  | 89760453 | 89768952 | BC048957     | chr1  | 89768448 | 89768932 |
|   | 3  | 89448667 | 89457166 | NM_029974    | chr3  | 89453924 | 89454523 |
|   | 15 | 89415695 | 89425672 | NM_026817    | chr15 | 89415993 | 89416578 |
|   | 13 | 89289634 | 89298345 | NM_010103    | chr13 | 89295799 | 89296560 |
|   | 2  | 89281473 | 89289972 | NM_146455    | chr2  | 89283836 | 89284466 |
|   | 11 | 89232539 | 89241038 | NM_172534    | chr11 | 89236860 | 89237464 |
|   | 5  | 89048012 | 89056511 | NM_027631    | chr5  | 89050705 | 89051719 |
|   | 5  | 88770140 | 88779982 | NM_009972    | chr5  | 88770257 | 88770861 |
|   | 4  | 88750924 | 88759423 | NM_001040654 | chr4  | 88756799 | 88757416 |
|   | 2  | 88281573 | 88290072 | NM_146823    | chr2  | 88287778 | 88288403 |
|   | 9  | 88234323 | 88242829 | NM_172926    | chr9  | 88236575 | 88237299 |
|   | 2  | 88201272 | 88209771 | NM_146917    | chr2  | 88201958 | 88202565 |
|   | 2  | 87470705 | 87479204 | NM_146660    | chr2  | 87472182 | 87473341 |
|   | 14 | 87312825 | 87324675 | NM_178685    | chr14 | 87323432 | 87324234 |
|   | 8  | 87299469 | 87308195 | NM_007578    | chr8  | 87303948 | 87304590 |

|    |          |          |              |       |          |          |
|----|----------|----------|--------------|-------|----------|----------|
| 10 | 87282867 | 87297027 | NM_184052    | chr10 | 87291957 | 87292791 |
| 2  | 87290755 | 87299257 | NM_178250    | chr2  | 87290847 | 87291659 |
| 3  | 87257978 | 87266477 | BC023765     | chr3  | 87259980 | 87260570 |
| 2  | 87229328 | 87237827 | NM_147028    | chr2  | 87229846 | 87230456 |
| 17 | 87171690 | 87180241 | NM_176808    | chr17 | 87176888 | 87177734 |
| 9  | 87050735 | 87059234 | BC064713     | chr9  | 87052226 | 87052817 |
| 3  | 87003658 | 87012779 | NM_027539    | chr3  | 87007674 | 87008364 |
| 2  | 86986528 | 86995027 | NM_146661    | chr2  | 86992845 | 86993439 |
| 9  | 86807483 | 86822509 | NM_024195    | chr9  | 86812176 | 86813011 |
| 9  | 86675821 | 86684600 | NM_013669    | chr9  | 86678822 | 86679469 |
| 2  | 86184756 | 86193255 | NM_146391    | chr2  | 86189169 | 86189566 |
| 2  | 86027309 | 86043672 | NM_147014    | chr2  | 86035323 | 86035912 |
| 6  | 85773022 | 85781521 | NM_053097    | chr6  | 85774724 | 85775328 |
| X  | 85659909 | 85668408 | NM_008821    | chrX  | 85660190 | 85661130 |
| 15 | 85647000 | 85655499 | NM_011105    | chr15 | 85647233 | 85648175 |
| 10 | 84526542 | 84535072 | NM_001013028 | chr10 | 84534692 | 84535574 |
| 10 | 84526719 | 84538287 | NM_010214    | chr10 | 84534692 | 84535574 |
| 2  | 84469041 | 84484886 | NM_025868    | chr2  | 84478597 | 84479531 |
| 2  | 84473264 | 84481763 | NM_025885    | chr2  | 84478597 | 84479531 |
| 2  | 84469041 | 84484886 | NM_025868    | chr2  | 84471452 | 84472263 |
| 10 | 84179847 | 84188492 | NM_001024918 | chr10 | 84181566 | 84182181 |
| 15 | 83948442 | 83956941 | NM_029427    | chr15 | 83953976 | 83954684 |
| 17 | 83608525 | 83617034 | NM_054082    | chr17 | 83614572 | 83615290 |
| 2  | 83607567 | 83616066 | NM_175514    | chr2  | 83612700 | 83613677 |
| 2  | 83519354 | 83527853 | NM_008402    | chr2  | 83523407 | 83524123 |
| 4  | 83159993 | 83168492 | BC039810     | chr4  | 83161610 | 83162102 |
| 3  | 83135465 | 83143994 | NM_016784    | chr3  | 83136215 | 83136809 |
| 6  | 83125609 | 83134108 | BC066061     | chr6  | 83128211 | 83128840 |
| 6  | 83033302 | 83041883 | NM_009392    | chr6  | 83037938 | 83038845 |
| 6  | 83038048 | 83054527 | NM_197992    | chr6  | 83037938 | 83038845 |
| 3  | 82158113 | 82166616 | NM_017469    | chr3  | 82158258 | 82159065 |
| 4  | 81973516 | 81982354 | NM_008687    | chr4  | 81976156 | 81976739 |
| 15 | 81693718 | 81702261 | NM_080633    | chr15 | 81699089 | 81699717 |
| 15 | 81696648 | 81705163 | NM_026737    | chr15 | 81699089 | 81699717 |
| 8  | 81399407 | 81408033 | NM_029736    | chr8  | 81402252 | 81402933 |
| 8  | 81402415 | 81411000 | NM_009033    | chr8  | 81402252 | 81402933 |
| 8  | 81330225 | 81338724 | NM_138944    | chr8  | 81334255 | 81334940 |
| 12 | 81103423 | 81111922 | AF031663     | chr12 | 81106168 | 81106837 |
| 17 | 80932974 | 80941473 | BC065413     | chr17 | 80937902 | 80938510 |
| 10 | 80573788 | 80589546 | NM_007907    | chr10 | 80584502 | 80585784 |
| 2  | 80245188 | 80254464 | NM_011356    | chr2  | 80245186 | 80245793 |
| 10 | 79892035 | 79900582 | NM_139226    | chr10 | 79895605 | 79896471 |
| 2  | 79253392 | 79263479 | NM_010894    | chr2  | 79255700 | 79256303 |
| 10 | 79218150 | 79226671 | NM_030218    | chr10 | 79222949 | 79223707 |
| 10 | 79189615 | 79198114 | NM_001042710 | chr10 | 79196262 | 79197360 |
| 10 | 79190717 | 79199216 | BC015297     | chr10 | 79196262 | 79197360 |
| 10 | 78951038 | 78964220 | NM_027422    | chr10 | 78958417 | 78959058 |

|    |          |          |              |       |          |          |
|----|----------|----------|--------------|-------|----------|----------|
| 17 | 78639119 | 78647618 | NM_011500    | chr17 | 78645011 | 78645625 |
| 11 | 78510206 | 78519568 | NM_008702    | chr11 | 78512077 | 78513123 |
| 15 | 78066089 | 78074746 | NM_008677    | chr15 | 78067521 | 78068291 |
| 11 | 77979223 | 77987722 | NM_009423    | chr11 | 77982984 | 77983618 |
| 9  | 77971666 | 77980203 | NM_010357    | chr9  | 77977901 | 77978517 |
| 5  | 77436018 | 77444563 | NM_019515    | chr5  | 77441247 | 77441893 |
| 11 | 77369289 | 77377788 | BC016522     | chr11 | 77371912 | 77372530 |
| 10 | 77144360 | 77172719 | NM_010670    | chr10 | 77157495 | 77158402 |
| 10 | 77144360 | 77172719 | NM_010670    | chr10 | 77155549 | 77156180 |
| 12 | 77083825 | 77092324 | U81451       | chr12 | 77083965 | 77084642 |
| 10 | 76859444 | 76867989 | NM_001024840 | chr10 | 76862654 | 76863258 |
| 15 | 76535232 | 76557095 | NM_058214    | chr15 | 76540176 | 76540889 |
| 11 | 76482665 | 76498771 | NM_177709    | chr11 | 76494464 | 76495132 |
| 11 | 76482665 | 76498771 | NM_177709    | chr11 | 76483407 | 76484062 |
| 8  | 76246095 | 76254913 | NM_010687    | chr8  | 76249463 | 76250082 |
| 18 | 76178823 | 76187322 | BC018187     | chr18 | 76179156 | 76179806 |
| 15 | 76089344 | 76097883 | NM_028852    | chr15 | 76090864 | 76091491 |
| 9  | 75405650 | 75414706 | NM_027309    | chr9  | 75411450 | 75412057 |
| 1  | 75356715 | 75365227 | NM_177056    | chr1  | 75361352 | 75362375 |
| 1  | 75359920 | 75368549 | NM_001001565 | chr1  | 75361352 | 75362375 |
| 10 | 75239737 | 75248300 | NM_008185    | chr10 | 75245304 | 75245932 |
| 14 | 75232720 | 75241219 | NM_009366    | chr14 | 75240060 | 75240710 |
| 3  | 75227150 | 75235649 | NM_172515    | chr3  | 75228001 | 75228591 |
| 10 | 75027097 | 75035872 | NM_011820    | chr10 | 75034943 | 75035683 |
| 2  | 74990189 | 74998689 | BC092050     | chr2  | 74992916 | 74993504 |
| 11 | 74983215 | 74991714 | NM_010430    | chr11 | 74987334 | 74987977 |
| 10 | 74683240 | 74691739 | BC037464     | chr10 | 74686220 | 74686624 |
| 13 | 74311084 | 74319614 | NM_028186    | chr13 | 74318244 | 74318849 |
| 18 | 74187819 | 74196318 | NM_172632    | chr18 | 74191562 | 74192342 |
| 11 | 74020985 | 74029484 | NM_146711    | chr11 | 74028962 | 74029339 |
| 11 | 74020985 | 74029484 | NM_146711    | chr11 | 74024639 | 74025494 |
| 11 | 74005700 | 74014199 | NM_207622    | chr11 | 74009114 | 74009707 |
| 14 | 73970442 | 73978995 | NM_019775    | chr14 | 73970484 | 73971294 |
| 5  | 73924367 | 73932879 | NM_011890    | chr5  | 73930697 | 73931763 |
| 7  | 73884675 | 73893187 | NM_009181    | chr7  | 73885270 | 73885900 |
| 13 | 73720801 | 73733346 | NM_018885    | chr13 | 73727728 | 73728399 |
| 2  | 73573438 | 73581937 | BC054770     | chr2  | 73578052 | 73578788 |
| 15 | 73532123 | 73540760 | NM_173365    | chr15 | 73537171 | 73537700 |
| 5  | 72857714 | 72872685 | NM_001024147 | chr5  | 72861184 | 72861864 |
| 8  | 72814177 | 72822676 | NM_026818    | chr8  | 72816498 | 72817469 |
| 17 | 72735704 | 72745112 | NM_027166    | chr17 | 72744103 | 72744571 |
| 14 | 72279898 | 72288397 | NM_172527    | chr14 | 72283150 | 72283754 |
| 14 | 72280941 | 72289449 | NM_011506    | chr14 | 72283150 | 72283754 |
| 6  | 72270843 | 72288161 | NM_144916    | chr6  | 72283140 | 72283959 |
| 11 | 72268237 | 72278814 | BC025823     | chr11 | 72273728 | 72274877 |
| 11 | 72017749 | 72033866 | NM_026559    | chr11 | 72018708 | 72019309 |
| 6  | 71249243 | 71257742 | U76371       | chr6  | 71253465 | 71254255 |

|   |    |          |          |              |       |          |          |
|---|----|----------|----------|--------------|-------|----------|----------|
|   | 11 | 70847151 | 70855708 | NM_134022    | chr11 | 70854788 | 70855660 |
|   | 18 | 70653008 | 70661690 | NM_011972    | chr18 | 70659024 | 70659943 |
| X |    | 70033782 | 70042444 | NM_009279    | chrX  | 70042104 | 70042745 |
| X |    | 70037091 | 70045617 | NM_008323    | chrX  | 70042104 | 70042745 |
|   | 11 | 69775696 | 69784552 | NM_016887    | chr11 | 69782891 | 69783522 |
|   | 11 | 69632136 | 69657044 | NM_198862    | chr11 | 69642264 | 69642953 |
| X |    | 69438936 | 69447441 | BC064787     | chrX  | 69446272 | 69447156 |
|   | 14 | 69374353 | 69383348 | NM_008004    | chr14 | 69377708 | 69378535 |
| X |    | 69363767 | 69378335 | NM_001025383 | chrX  | 69374046 | 69374576 |
| X |    | 69367923 | 69376422 | NM_001045539 | chrX  | 69374046 | 69374576 |
|   | 11 | 68909129 | 68919216 | NM_011065    | chr11 | 68914493 | 68915267 |
|   | 2  | 67912567 | 67921066 | NM_020283    | chr2  | 67918146 | 67919097 |
|   | 5  | 67375762 | 67384261 | NM_008888    | chr5  | 67378431 | 67379248 |
|   | 5  | 67375762 | 67384261 | NM_008888    | chr5  | 67375877 | 67376850 |
|   | 18 | 67324792 | 67333291 | NM_024190    | chr18 | 67326480 | 67327200 |
|   | 18 | 66092971 | 66101568 | NM_145493    | chr18 | 66095694 | 66096309 |
|   | 18 | 65744672 | 65753171 | BC046409     | chr18 | 65747834 | 65748434 |
|   | 18 | 65589707 | 65598206 | BC046536     | chr18 | 65593936 | 65594514 |
|   | 1  | 64982915 | 64991414 | NM_007777    | chr1  | 64990789 | 64991402 |
|   | 18 | 64783597 | 64792369 | NM_001001488 | chr18 | 64786559 | 64787622 |
|   | 1  | 64548215 | 64557444 | NM_025964    | chr1  | 64550546 | 64551163 |
|   | 11 | 64245473 | 64254026 | NM_178870    | chr11 | 64248463 | 64249021 |
|   | 7  | 63317722 | 63326221 | NM_130880    | chr7  | 63318286 | 63318643 |
|   | 18 | 62443573 | 62452072 | NM_008313    | chr18 | 62451746 | 62452177 |
|   | 7  | 62296590 | 62305089 | NM_011746    | chr7  | 62299205 | 62300163 |
|   | 11 | 61668313 | 61677268 | NM_013881    | chr11 | 61670265 | 61671259 |
|   | 2  | 61387966 | 61396497 | BC026148     | chr2  | 61388697 | 61389315 |
|   | 18 | 61031609 | 61040108 | NM_001038499 | chr18 | 61032678 | 61033367 |
|   | 2  | 60679810 | 60688309 | BC057866     | chr2  | 60685958 | 60686463 |
|   | 2  | 59700314 | 59708813 | BC042646     | chr2  | 59706445 | 59707360 |
|   | 10 | 59581565 | 59595596 | NM_016803    | chr10 | 59582100 | 59582830 |
|   | 14 | 59326430 | 59334955 | NM_028113    | chr14 | 59333342 | 59333970 |
|   | 16 | 59142181 | 59150680 | NM_001011808 | chr16 | 59143491 | 59144251 |
|   | 7  | 59090619 | 59099580 | NM_011668    | chr7  | 59095942 | 59096573 |
|   | 16 | 59085085 | 59093584 | NM_146998    | chr16 | 59089481 | 59090156 |
|   | 19 | 59000427 | 59008926 | BC023285     | chr19 | 59002475 | 59002946 |
|   | 16 | 58967662 | 58976161 | NM_146321    | chr16 | 58969473 | 58970087 |
|   | 6  | 58834144 | 58842654 | NM_021432    | chr6  | 58836781 | 58837708 |
|   | 16 | 58812905 | 58821404 | NM_146993    | chr16 | 58815446 | 58816374 |
|   | 11 | 58773976 | 58782475 | NM_031172    | chr11 | 58778743 | 58779485 |
|   | 11 | 58534742 | 58543241 | NM_146501    | chr11 | 58540927 | 58541802 |
|   | 1  | 58446966 | 58455473 | NM_008765    | chr1  | 58451949 | 58452808 |
|   | 1  | 58446966 | 58455473 | NM_008765    | chr1  | 58449668 | 58450296 |
|   | 9  | 58280740 | 58290244 | NM_176921    | chr9  | 58288292 | 58288898 |
|   | 13 | 58222716 | 58231259 | NM_152234    | chr13 | 58224903 | 58225641 |
|   | 6  | 58143096 | 58151595 | NM_134436    | chr6  | 58145417 | 58146052 |
|   | 11 | 57997954 | 58006453 | DQ508487     | chr11 | 58000454 | 58001555 |

|   |    |          |                       |       |          |          |
|---|----|----------|-----------------------|-------|----------|----------|
|   | 5  | 57890614 | 57899232 BC008259     | chr5  | 57896064 | 57897018 |
|   | 10 | 57616384 | 57638017 NM_001034869 | chr10 | 57629229 | 57630579 |
|   | 10 | 57616384 | 57638017 NM_001034869 | chr10 | 57624421 | 57624843 |
|   | 10 | 57616384 | 57638017 NM_001034869 | chr10 | 57616800 | 57617991 |
|   | 9  | 57401855 | 57410388 NM_146223    | chr9  | 57409947 | 57410372 |
|   | 8  | 56144628 | 56153127 BC042703     | chr8  | 56151219 | 56152033 |
|   | 17 | 56143625 | 56152191 NM_011483    | chr17 | 56148402 | 56149124 |
|   | 6  | 55608135 | 55616647 NM_009717    | chr6  | 55611151 | 55612050 |
|   | 13 | 55449083 | 55457595 NM_001038018 | chr13 | 55449660 | 55450257 |
|   | 16 | 55205658 | 55214188 NM_178720    | chr16 | 55209105 | 55209717 |
|   | 6  | 54961579 | 54970097 NM_180678    | chr6  | 54967946 | 54968542 |
|   | 6  | 54961579 | 54970097 NM_180678    | chr6  | 54962294 | 54963310 |
|   | 13 | 54773563 | 54782062 NM_033610    | chr13 | 54773697 | 54774484 |
|   | 14 | 54475763 | 54493519 NM_008736    | chr14 | 54476876 | 54477504 |
|   | 6  | 54357300 | 54365799 NM_198118    | chr6  | 54358147 | 54358746 |
|   | 11 | 54108198 | 54116702 NM_010556    | chr11 | 54109353 | 54110266 |
|   | 14 | 53917549 | 53926798 NM_010856    | chr14 | 53922936 | 53923690 |
| X |    | 53848002 | 53856501 NM_001033360 | chrX  | 53849003 | 53849616 |
|   | 3  | 53742785 | 53751284 NM_172862    | chr3  | 53742672 | 53743368 |
|   | 14 | 53506042 | 53514541 NM_145462    | chr14 | 53508359 | 53508751 |
| X |    | 53072571 | 53081240 NM_001077361 | chrX  | 53078257 | 53078978 |
|   | 14 | 53027025 | 53035524 BC111819     | chr14 | 53034041 | 53034897 |
|   | 13 | 52974665 | 52987346 BC100384     | chr13 | 52981026 | 52981667 |
|   | 1  | 52651206 | 52659705 NM_133829    | chr1  | 52653791 | 52654435 |
|   | 9  | 52436698 | 52447832 NM_177907    | chr9  | 52442839 | 52443854 |
|   | 6  | 52128026 | 52170522 NM_008263    | chr6  | 52165375 | 52166561 |
|   | 6  | 52128026 | 52170522 NM_008263    | chr6  | 52162904 | 52163708 |
|   | 1  | 52092127 | 52100626 BC057690     | chr1  | 52098778 | 52099546 |
|   | 1  | 52092127 | 52100626 BC057690     | chr1  | 52095466 | 52096112 |
|   | 5  | 51839565 | 51848109 NM_008904    | chr5  | 51845418 | 51846233 |
|   | 3  | 51565895 | 51574444 NM_016858    | chr3  | 51571891 | 51572548 |
|   | 9  | 51511717 | 51520216 NM_175535    | chr9  | 51519217 | 51519976 |
|   | 11 | 50757079 | 50765584 NM_001044697 | chr11 | 50761472 | 50762411 |
|   | 6  | 50581528 | 50590027 NM_021892    | chr6  | 50586759 | 50587363 |
|   | 7  | 50461209 | 50469708 NM_172901    | chr7  | 50462066 | 50462742 |
|   | 18 | 50166070 | 50181349 NM_134131    | chr18 | 50172663 | 50173298 |
|   | 11 | 50079395 | 50087921 NM_008521    | chr11 | 50083129 | 50083750 |
|   | 14 | 49923702 | 49932379 NM_029145    | chr14 | 49929975 | 49930973 |
|   | 3  | 49850958 | 49859476 NM_130448    | chr3  | 49851051 | 49852082 |
| X |    | 49796549 | 49805160 NM_028375    | chrX  | 49797102 | 49797774 |
|   | 13 | 49688080 | 49696580 NM_172015    | chr13 | 49688187 | 49688825 |
|   | 7  | 49502357 | 49510856 NM_001005232 | chr7  | 49506789 | 49507447 |
|   | 12 | 49433599 | 49442098 M74555       | chr12 | 49439894 | 49440697 |
|   | 11 | 49331958 | 49340457 NM_001011805 | chr11 | 49332188 | 49332774 |
| X |    | 49226705 | 49235328 NM_013556    | chrX  | 49233558 | 49233926 |
|   | 11 | 49154971 | 49163470 NM_206822    | chr11 | 49162444 | 49163062 |
|   | 11 | 48985682 | 48994181 NM_146877    | chr11 | 48986576 | 48987503 |

|   |    |          |                       |       |          |          |
|---|----|----------|-----------------------|-------|----------|----------|
|   | 11 | 48833014 | 48847103 NM_011579    | chr11 | 48834762 | 48835396 |
|   | 6  | 48765095 | 48778962 NM_025326    | chr6  | 48774026 | 48774662 |
|   | 6  | 48767635 | 48776614 NM_023056    | chr6  | 48774026 | 48774662 |
|   | 6  | 48662633 | 48678381 NM_175035    | chr6  | 48676851 | 48677696 |
|   | 16 | 48344863 | 48353431 NM_010816    | chr16 | 48349431 | 48349955 |
|   | 8  | 48027931 | 48036430 BC006692     | chr8  | 48032903 | 48033752 |
|   | 6  | 47876987 | 47885597 NM_178898    | chr6  | 47879515 | 47880231 |
|   | 7  | 47847618 | 47856318 NM_153524    | chr7  | 47851175 | 47852118 |
|   | 4  | 47489761 | 47498300 NM_024171    | chr4  | 47490368 | 47490961 |
|   | 19 | 47309478 | 47318114 NM_177833    | chr19 | 47316864 | 47317547 |
|   | 13 | 47198993 | 47207492 BC025007     | chr13 | 47205591 | 47206232 |
|   | 17 | 46962979 | 46971478 NM_022015    | chr17 | 46969105 | 46970137 |
|   | 11 | 46007283 | 46015782 NM_172524    | chr11 | 46009206 | 46009892 |
|   | 9  | 45973705 | 45982430 NM_009692    | chr9  | 45975227 | 45976100 |
| X |    | 45970127 | 45978626 NM_207631    | chrX  | 45971218 | 45972044 |
|   | 7  | 45229275 | 45237774 NM_016664    | chr7  | 45228754 | 45229358 |
|   | 16 | 45072161 | 45080676 NM_026402    | chr16 | 45077100 | 45077784 |
|   | 16 | 45075435 | 45083971 NM_028756    | chr16 | 45077100 | 45077784 |
|   | 7  | 45016396 | 45040099 NM_182993    | chr7  | 45037513 | 45038428 |
|   | 17 | 44894603 | 44903318 NM_152810    | chr17 | 44896945 | 44897550 |
| X |    | 44862205 | 44871123 NM_011398    | chrX  | 44868885 | 44869777 |
|   | 13 | 44735810 | 44744374 NM_021878    | chr13 | 44740908 | 44741398 |
|   | 9  | 44547712 | 44559952 NM_027865    | chr9  | 44550708 | 44551315 |
| X |    | 44385154 | 44393668 NM_028773    | chrX  | 44390748 | 44391682 |
|   | 7  | 44327477 | 44338692 NM_026690    | chr7  | 44333165 | 44333692 |
|   | 16 | 44249671 | 44258528 NM_198034    | chr16 | 44254947 | 44255565 |
|   | 16 | 44053141 | 44061887 NM_028108    | chr16 | 44058288 | 44059377 |
|   | 16 | 44055830 | 44064351 NM_007508    | chr16 | 44058288 | 44059377 |
|   | 9  | 44051085 | 44062629 NM_172162    | chr9  | 44056176 | 44056986 |
|   | 4  | 43742298 | 43753633 NM_027789    | chr4  | 43745996 | 43747071 |
|   | 10 | 43206510 | 43215009 BC096419     | chr10 | 43206548 | 43207099 |
|   | 13 | 43127811 | 43139359 NM_001005748 | chr13 | 43137958 | 43138547 |
|   | 17 | 43090855 | 43099354 NM_198418    | chr17 | 43093870 | 43094916 |
|   | 6  | 43090667 | 43106058 NM_146652    | chr6  | 43092770 | 43093495 |
|   | 9  | 42853974 | 42864234 NM_027144    | chr9  | 42857420 | 42858278 |
|   | 13 | 42714553 | 42723052 NM_001005740 | chr13 | 42719135 | 42719799 |
|   | 6  | 42667646 | 42676145 NM_001011799 | chr6  | 42673951 | 42674544 |
|   | 6  | 42667646 | 42676145 NM_001011799 | chr6  | 42670929 | 42671541 |
|   | 6  | 42620167 | 42628694 NM_029930    | chr6  | 42620505 | 42621284 |
|   | 2  | 42472477 | 42481607 NM_053011    | chr2  | 42472550 | 42473235 |
|   | 6  | 42388125 | 42396624 NM_146444    | chr6  | 42394775 | 42395709 |
|   | 10 | 42269504 | 42278047 NM_152229    | chr10 | 42276473 | 42277120 |
|   | 9  | 42148425 | 42156924 NM_009347    | chr9  | 42152888 | 42153500 |
|   | 4  | 41979785 | 41988284 BC051472     | chr4  | 41985807 | 41986407 |
|   | 4  | 41979785 | 41988284 BC051472     | chr4  | 41980821 | 41981729 |
|   | 4  | 41752465 | 41760964 NM_175138    | chr4  | 41753802 | 41754415 |
|   | 6  | 41699474 | 41707973 NM_146576    | chr6  | 41699509 | 41700120 |



|    |          |          |              |       |          |          |
|----|----------|----------|--------------|-------|----------|----------|
| 13 | 41654417 | 41662916 | NM_177808    | chr13 | 41660415 | 41661029 |
| 6  | 41102048 | 41110547 | M16120       | chr6  | 41104632 | 41105220 |
| 6  | 40494964 | 40503463 | NM_146383    | chr6  | 40501270 | 40501979 |
| 1  | 40404222 | 40413051 | NM_008365    | chr1  | 40405487 | 40406137 |
| 1  | 40378308 | 40387753 | NM_001025602 | chr1  | 40385672 | 40386263 |
| 1  | 40023314 | 40031837 | NM_010555    | chr1  | 40024691 | 40025515 |
| 9  | 39931650 | 39945458 | NM_030713    | chr9  | 39934194 | 39934919 |
| 18 | 39893471 | 39901991 | NM_011033    | chr18 | 39899830 | 39901076 |
| 9  | 39367696 | 39376195 | NM_146279    | chr9  | 39375672 | 39376135 |
| 7  | 39184821 | 39193364 | NM_177890    | chr7  | 39187762 | 39188890 |
| 9  | 38674660 | 38683161 | NM_146272    | chr9  | 38681137 | 38681780 |
| 13 | 38197950 | 38214932 | NM_026382    | chr13 | 38202977 | 38203695 |
| 2  | 38167317 | 38176092 | NM_010710    | chr2  | 38172091 | 38173020 |
| 5  | 38110119 | 38118834 | NM_010835    | chr5  | 38116913 | 38117672 |
| 1  | 37858540 | 37867039 | NM_001033427 | chr1  | 37862363 | 37862835 |
| 18 | 37794309 | 37822874 | NM_033586    | chr18 | 37816021 | 37816652 |
| 18 | 37794309 | 37822874 | NM_033586    | chr18 | 37815211 | 37815900 |
| 18 | 37593514 | 37632802 | NM_053143    | chr18 | 37615498 | 37616451 |
| 18 | 37593514 | 37632802 | NM_053143    | chr18 | 37611830 | 37612760 |
| 18 | 37593514 | 37632802 | NM_053143    | chr18 | 37606634 | 37608166 |
| 18 | 37593514 | 37632802 | NM_053143    | chr18 | 37600276 | 37601012 |
| 18 | 37555759 | 37576153 | NM_053139    | chr18 | 37574514 | 37575378 |
| 18 | 37555759 | 37576153 | NM_053139    | chr18 | 37569227 | 37569982 |
| 18 | 37555759 | 37576153 | NM_053139    | chr18 | 37562483 | 37563324 |
| 18 | 37555759 | 37576153 | NM_053139    | chr18 | 37561558 | 37562281 |
| 18 | 37555759 | 37576153 | NM_053139    | chr18 | 37559932 | 37560720 |
| 18 | 37531648 | 37540147 | NM_053135    | chr18 | 37538569 | 37539397 |
| 18 | 37475245 | 37483744 | NM_053133    | chr18 | 37481951 | 37482623 |
| 18 | 37475245 | 37483744 | NM_053133    | chr18 | 37480977 | 37481647 |
| 18 | 37454002 | 37470213 | NM_053132    | chr18 | 37468653 | 37469357 |
| 18 | 37454002 | 37470213 | NM_053132    | chr18 | 37459748 | 37460468 |
| 18 | 37414814 | 37435955 | NM_053128    | chr18 | 37433307 | 37434836 |
| 9  | 37404397 | 37412983 | NM_025289    | chr9  | 37410012 | 37410929 |
| 3  | 37315002 | 37323503 | NM_008366    | chr3  | 37319119 | 37320154 |
| 18 | 37087605 | 37102275 | NM_001003672 | chr18 | 37098503 | 37099169 |
| 18 | 37087605 | 37102275 | NM_001003672 | chr18 | 37094140 | 37094802 |
| 18 | 37050158 | 37058657 | NM_198117    | chr18 | 37056381 | 37057254 |
| 13 | 37054171 | 37062670 | NM_028784    | chr13 | 37054461 | 37055052 |
| 17 | 36996583 | 37005082 | NM_001011764 | chr17 | 37004375 | 37005050 |
| 17 | 36984560 | 36993059 | NM_001011744 | chr17 | 36987359 | 36987960 |
| 16 | 36848252 | 36859023 | NM_008225    | chr16 | 36855068 | 36855661 |
| 17 | 36827144 | 36835643 | NM_146514    | chr17 | 36830818 | 36831542 |
| 5  | 36795683 | 36804198 | NM_025725    | chr5  | 36796050 | 36796647 |
| 16 | 36741646 | 36750146 | NM_177128    | chr16 | 36744489 | 36745225 |
| 16 | 36744945 | 36753498 | BC004721     | chr16 | 36744489 | 36745225 |
| 17 | 36471627 | 36480154 | NM_011280    | chr17 | 36474304 | 36475044 |
| 2  | 36384609 | 36393108 | NM_146628    | chr2  | 36390569 | 36391558 |

|   |    |          |          |              |       |          |          |
|---|----|----------|----------|--------------|-------|----------|----------|
|   | 1  | 36311228 | 36319727 | NM_172652    | chr1  | 36312210 | 36312780 |
|   | 5  | 35993834 | 36002643 | NM_030127    | chr5  | 35994839 | 35995473 |
|   | 7  | 35262189 | 35270688 | NM_033080    | chr7  | 35262152 | 35262772 |
|   | 4  | 34997944 | 35006443 | AF017806     | chr4  | 34999510 | 35000336 |
|   | 14 | 34918406 | 34926953 | NM_175008    | chr14 | 34925530 | 34926117 |
| X |    | 34877181 | 34885736 | NM_021550    | chrX  | 34884624 | 34885212 |
|   | 2  | 34642691 | 34661686 | NM_013890    | chr2  | 34655083 | 34655699 |
|   | 17 | 34618635 | 34627134 | NM_138582    | chr17 | 34624016 | 34624643 |
|   | 5  | 33966664 | 33980735 | NM_026698    | chr5  | 33977994 | 33978589 |
|   | 17 | 33631887 | 33648012 | NM_009066    | chr17 | 33635759 | 33636625 |
|   | 17 | 33636306 | 33652390 | NM_009926    | chr17 | 33635759 | 33636625 |
| X |    | 33616726 | 33625287 | NM_153503    | chrX  | 33622324 | 33623310 |
| X |    | 33620093 | 33628683 | NM_019443    | chrX  | 33622324 | 33623310 |
|   | 18 | 33336128 | 33344627 | NM_133774    | chr18 | 33339052 | 33339682 |
| X |    | 33221094 | 33229616 | NM_007451    | chrX  | 33228988 | 33229568 |
|   | 3  | 32925825 | 32934932 | NM_029017    | chr3  | 32932573 | 32933118 |
|   | 3  | 32922611 | 32931118 | NM_025316    | chr3  | 32930053 | 32930656 |
|   | 3  | 32925825 | 32934932 | NM_029017    | chr3  | 32930053 | 32930656 |
|   | 13 | 32803495 | 32812745 | NM_030215    | chr13 | 32808937 | 32809744 |
|   | 3  | 32791191 | 32799690 | M87286       | chr3  | 32792840 | 32793408 |
| X |    | 32753854 | 32762451 | NM_028894    | chrX  | 32760906 | 32761513 |
|   | 3  | 32696141 | 32708450 | NM_144519    | chr3  | 32706901 | 32707495 |
|   | 3  | 32696141 | 32708450 | NM_144519    | chr3  | 32701364 | 32702064 |
| X |    | 32621395 | 32630741 | NM_028325    | chrX  | 32627333 | 32627992 |
|   | 14 | 32142860 | 32151359 | BC038272     | chr14 | 32144786 | 32145461 |
|   | 19 | 31828531 | 31837030 | NM_001013833 | chr19 | 31833309 | 31833901 |
|   | 12 | 31654023 | 31662537 | NM_027828    | chr12 | 31659150 | 31659764 |
|   | 3  | 31498674 | 31507173 | NM_172861    | chr3  | 31501765 | 31502471 |
|   | 14 | 31422936 | 31431435 | NM_001001796 | chr14 | 31427368 | 31428143 |
|   | 14 | 31424628 | 31433127 | NM_177134    | chr14 | 31427368 | 31428143 |
|   | 16 | 31192470 | 31201024 | NM_025800    | chr16 | 31192718 | 31193484 |
|   | 6  | 30886646 | 30895145 | DQ534758     | chr6  | 30886439 | 30887772 |
|   | 7  | 30757715 | 30770415 | NM_022007    | chr7  | 30759365 | 30760068 |
|   | 6  | 30677516 | 30690576 | NM_008590    | chr6  | 30685416 | 30686002 |
|   | 11 | 29612570 | 29621282 | NM_024226    | chr11 | 29614636 | 29615533 |
|   | 7  | 28937562 | 28947253 | NM_001033525 | chr7  | 28940167 | 28940584 |
|   | 7  | 28917345 | 28928795 | NM_001039721 | chr7  | 28923705 | 28924376 |
|   | 7  | 28917345 | 28928795 | NM_001039721 | chr7  | 28920111 | 28920745 |
|   | 14 | 28835319 | 28843905 | NM_019583    | chr14 | 28834703 | 28835671 |
|   | 11 | 28747204 | 28755709 | AY251056     | chr11 | 28747570 | 28748162 |
|   | 3  | 28209231 | 28217730 | NM_008875    | chr3  | 28215247 | 28215918 |
|   | 6  | 28073706 | 28090379 | NM_008174    | chr6  | 28079535 | 28080572 |
|   | 14 | 27326339 | 27335221 | NM_009524    | chr14 | 27330674 | 27331327 |
|   | 7  | 27039885 | 27052452 | NM_175641    | chr7  | 27040713 | 27041401 |
|   | 7  | 26934858 | 26943357 | NM_181593    | chr7  | 26936834 | 26937423 |
|   | 17 | 26566655 | 26575154 | NM_008700    | chr17 | 26571139 | 26572210 |
|   | 8  | 26564778 | 26573739 | NM_031257    | chr8  | 26568606 | 26569340 |

|   |    |          |                       |       |          |          |
|---|----|----------|-----------------------|-------|----------|----------|
|   | 9  | 26477261 | 26485867 AB055781     | chr9  | 26483827 | 26484548 |
|   | 18 | 25894261 | 25903167 NM_133195    | chr18 | 25894553 | 25895311 |
|   | 4  | 25797246 | 25805745 AB015426     | chr4  | 25801695 | 25802513 |
|   | 19 | 25470405 | 25479215 BC079563     | chr19 | 25476131 | 25476755 |
|   | 2  | 25280604 | 25297745 NM_153557    | chr2  | 25292575 | 25293096 |
|   | 13 | 25057469 | 25065968 NM_177577    | chr13 | 25062223 | 25062943 |
|   | 19 | 24965907 | 24974406 NM_008022    | chr19 | 24968005 | 24968770 |
|   | 2  | 24765791 | 24774344 NM_026021    | chr2  | 24772214 | 24772854 |
|   | 1  | 24636204 | 24644703 AY061989     | chr1  | 24636748 | 24637358 |
|   | 1  | 24564476 | 24575843 BC020072     | chr1  | 24569844 | 24570432 |
|   | 6  | 24472154 | 24480704 NM_080847    | chr6  | 24476660 | 24477748 |
|   | 6  | 24475198 | 24483697 NM_026614    | chr6  | 24476660 | 24477748 |
|   | 17 | 24370029 | 24391806 NM_023055    | chr17 | 24370048 | 24370808 |
|   | 8  | 24169578 | 24178108 NM_010546    | chr8  | 24170292 | 24170897 |
|   | 11 | 24057310 | 24065809 BC010585     | chr11 | 24057595 | 24058295 |
|   | 7  | 23815050 | 23823583 NM_021307    | chr7  | 23815067 | 23815815 |
|   | 7  | 23705871 | 23714370 NM_207619    | chr7  | 23711350 | 23711989 |
|   | 8  | 23625542 | 23637957 NM_011848    | chr8  | 23636310 | 23637009 |
|   | 10 | 23603772 | 23612271 NM_053205    | chr10 | 23606392 | 23607141 |
|   | 11 | 22866037 | 22874536 D17407       | chr11 | 22873612 | 22874224 |
|   | 11 | 22866037 | 22874536 D17407       | chr11 | 22872668 | 22873261 |
|   | 13 | 22626001 | 22634500 NM_134216    | chr13 | 22627801 | 22628398 |
|   | 8  | 22514294 | 22522795 NM_007845    | chr8  | 22519146 | 22519756 |
|   | 12 | 22450725 | 22459224 NM_001004167 | chr12 | 22454108 | 22454829 |
|   | 6  | 21893647 | 21902165 NM_023626    | chr6  | 21898858 | 21899451 |
|   | 9  | 21819248 | 21827747 NM_177318    | chr9  | 21823167 | 21823574 |
|   | 13 | 21785520 | 21800683 NM_020034    | chr13 | 21789838 | 21790463 |
|   | 13 | 21788953 | 21797452 NM_178202    | chr13 | 21789838 | 21790463 |
|   | 13 | 21536077 | 21551423 NM_139141    | chr13 | 21549871 | 21550470 |
|   | 19 | 21333375 | 21346023 NM_009551    | chr19 | 21344169 | 21344770 |
|   | 9  | 20760362 | 20768915 NM_010493    | chr9  | 20765649 | 20766566 |
| X |    | 20635585 | 20645551 NM_007429    | chrX  | 20636808 | 20637489 |
|   | 9  | 20240643 | 20249148 NM_146221    | chr9  | 20243309 | 20244008 |
| X |    | 20116421 | 20124937 NM_013840    | chrX  | 20118103 | 20118722 |
|   | 3  | 20081037 | 20089536 BC023403     | chr3  | 20087337 | 20088178 |
|   | 9  | 19632258 | 19640757 NM_146562    | chr9  | 19634721 | 19635592 |
|   | 14 | 19442511 | 19451055 NM_021508    | chr14 | 19443977 | 19444694 |
|   | 2  | 19357392 | 19372723 NM_018809    | chr2  | 19360319 | 19361309 |
|   | 7  | 19295111 | 19303610 NM_207547    | chr7  | 19296895 | 19297790 |
|   | 13 | 19186420 | 19194919 M54990       | chr13 | 19191145 | 19191776 |
|   | 13 | 19186420 | 19194919 M54990       | chr13 | 19187235 | 19188085 |
|   | 1  | 19082234 | 19090735 NM_153154    | chr1  | 19087894 | 19088612 |
|   | 19 | 18696212 | 18704828 NM_017375    | chr19 | 18703733 | 18704357 |
|   | 7  | 18689005 | 18697504 BC024868     | chr7  | 18690985 | 18692064 |
|   | 7  | 18156575 | 18165416 NM_178757    | chr7  | 18161505 | 18161887 |
|   | 16 | 18035212 | 18043770 NM_022982    | chr16 | 18042578 | 18043424 |
|   | 7  | 17218449 | 17227012 NM_026087    | chr7  | 17220852 | 17221924 |

|          |    |          |          |              |             |          |          |
|----------|----|----------|----------|--------------|-------------|----------|----------|
|          | 7  | 17162411 | 17170923 | NM_027210    | chr7        | 17167003 | 17167603 |
|          | 7  | 17124646 | 17133200 | NM_023289    | chr7        | 17128031 | 17128631 |
| X        |    | 15770657 | 15779286 | NM_173740    | chrX        | 15776987 | 15777768 |
|          | 9  | 15622354 | 15630853 | NM_145712    | chr9        | 15625312 | 15626081 |
|          | 7  | 15605301 | 15613800 | NM_026938    | chr7        | 15610832 | 15611755 |
|          | 17 | 15528777 | 15537276 | NM_178615    | chr17       | 15528689 | 15529486 |
|          | 9  | 15249611 | 15258110 | NM_133214    | chr9        | 15252133 | 15252769 |
|          | 6  | 15129506 | 15138008 | NM_212435    | chr6        | 15129508 | 15130214 |
|          | 10 | 14126197 | 14134696 | BC080779     | chr10       | 14132821 | 14133674 |
|          | 19 | 13980041 | 13988540 | NM_001011850 | chr19       | 13986380 | 13987176 |
| Y_random |    | 13974415 | 13982914 | L04848       | chrY_random | 13980325 | 13981197 |
| Y_random |    | 13974415 | 13982914 | L04848       | chrY_random | 13976580 | 13977004 |
|          | 19 | 13829326 | 13837825 | NM_146344    | chr19       | 13835812 | 13836413 |
|          | 19 | 13715465 | 13723964 | NM_001011832 | chr19       | 13721491 | 13722180 |
|          | 19 | 13680183 | 13688682 | NM_146636    | chr19       | 13686391 | 13686991 |
|          | 10 | 13556529 | 13565178 | NM_025446    | chr10       | 13558581 | 13559176 |
|          | 19 | 13519035 | 13527534 | NM_146690    | chr19       | 13527258 | 13527909 |
|          | 19 | 13295271 | 13303770 | NM_001011840 | chr19       | 13298679 | 13299488 |
|          | 17 | 13141000 | 13149499 | BC061173     | chr17       | 13145022 | 13145613 |
|          | 8  | 13015918 | 13028522 | NM_010172    | chr8        | 13017852 | 13018447 |
|          | 13 | 12615007 | 12623536 | NM_026184    | chr13       | 12617509 | 12617914 |
|          | 19 | 12363676 | 12372175 | NM_146687    | chr19       | 12367152 | 12367768 |
| X        |    | 12353520 | 12362019 | NM_013762    | chrX        | 12360535 | 12361240 |
| Y_random |    | 12127745 | 12137642 | BC100413     | chrY_random | 12134681 | 12136523 |
| Y_random |    | 12127745 | 12137642 | BC100413     | chrY_random | 12133951 | 12134443 |
| Y_random |    | 12127745 | 12137642 | BC100413     | chrY_random | 12132796 | 12133408 |
| Y_random |    | 12127745 | 12137642 | BC100413     | chrY_random | 12131034 | 12132414 |
| Y_random |    | 12127745 | 12137642 | BC100413     | chrY_random | 12130290 | 12130528 |
| Y_random |    | 12059277 | 12069118 | BC100414     | chrY_random | 12067269 | 12068370 |
| Y_random |    | 12059277 | 12069118 | BC100414     | chrY_random | 12066501 | 12067144 |
| Y_random |    | 12059277 | 12069118 | BC100414     | chrY_random | 12064345 | 12065068 |
| Y_random |    | 12059277 | 12069118 | BC100414     | chrY_random | 12063127 | 12064088 |
|          | 19 | 11957044 | 11965543 | NM_146410    | chr19       | 11957877 | 11958484 |
| Y_random |    | 11608280 | 11616797 | NM_001017393 | chrY_random | 11616407 | 11617482 |
|          | 14 | 11613813 | 11622346 | NM_012061    | chr14       | 11615136 | 11615732 |
| Y_random |    | 11608280 | 11616797 | NM_001017393 | chrY_random | 11611691 | 11612965 |
| Y_random |    | 11349402 | 11359374 | NM_023546    | chrY_random | 11353499 | 11354195 |
| Y_random |    | 11349402 | 11359374 | NM_023546    | chrY_random | 11350664 | 11352069 |
|          | 4  | 11309021 | 11320619 | NM_194055    | chr4        | 11318984 | 11319444 |
| Y_random |    | 11275195 | 11283694 | NM_001017394 | chrY_random | 11282196 | 11282729 |
| Y_random |    | 11275195 | 11283694 | NM_001017394 | chrY_random | 11280728 | 11281690 |
|          | 12 | 10923772 | 10932304 | BC108372     | chr12       | 10924496 | 10925107 |
|          | 7  | 10746639 | 10755138 | NM_134206    | chr7        | 10753126 | 10753732 |
| X        |    | 10450183 | 10484020 | BC049545     | chrX        | 10480025 | 10480586 |
| X        |    | 10450183 | 10484020 | BC049545     | chrX        | 10473691 | 10474252 |
| X        |    | 10450183 | 10484020 | BC049545     | chrX        | 10470524 | 10471085 |
|          | 16 | 9903612  | 9912111  | NM_008170    | chr16       | 9907720  | 9908591  |

|          |    |         |                      |             |         |         |
|----------|----|---------|----------------------|-------------|---------|---------|
|          | 13 | 9161607 | 9170106 BC051459     | chr13       | 9166190 | 9166850 |
|          | 7  | 9147598 | 9156244 NM_134230    | chr7        | 9148811 | 9149409 |
| X        |    | 7954650 | 7963149 NM_199319    | chrX        | 7957547 | 7958323 |
|          | 11 | 7091782 | 7100281 NM_008341    | chr11       | 7094352 | 7094995 |
|          | 18 | 7002255 | 7010754 NM_177595    | chr18       | 7007063 | 7007730 |
|          | 6  | 6829409 | 6838082 NM_010056    | chr6        | 6836288 | 6837130 |
|          | 11 | 6552536 | 6561039 NM_019511    | chr11       | 6555647 | 6556348 |
| X        |    | 6530286 | 6538785 NM_019461    | chrX        | 6531110 | 6532109 |
|          | 10 | 6359875 | 6368374 BC030437     | chr10       | 6364480 | 6365306 |
|          | 2  | 6028888 | 6037387 BC023193     | chr2        | 6035971 | 6036815 |
|          | 10 | 5908207 | 5919874 NM_025343    | chr10       | 5916727 | 5917456 |
|          | 10 | 5911422 | 5920028 NM_024261    | chr10       | 5916727 | 5917456 |
|          | 17 | 5791846 | 5800361 NM_025664    | chr17       | 5794198 | 5794858 |
|          | 19 | 5683131 | 5692269 NM_022012    | chr19       | 5688704 | 5689360 |
|          | 1  | 5572574 | 5581137 NM_011011    | chr1        | 5579472 | 5580230 |
|          | 7  | 5485130 | 5493629 NM_207544    | chr7        | 5486564 | 5487205 |
|          | 7  | 5404933 | 5414532 NM_030742    | chr7        | 5409914 | 5410509 |
|          | 7  | 5404933 | 5414532 NM_030742    | chr7        | 5406052 | 5406685 |
|          | 19 | 5363848 | 5372651 NM_001038231 | chr19       | 5370364 | 5371001 |
| X        |    | 5216983 | 5225736 NM_021431    | chrX        | 5224533 | 5225543 |
|          | 19 | 4956315 | 4964852 NM_025553    | chr19       | 4961358 | 4961966 |
|          | 19 | 4588361 | 4596860 NM_008797    | chr19       | 4588375 | 4589003 |
| X        |    | 4509172 | 4517671 BC117727     | chrX        | 4513199 | 4514294 |
|          | 8  | 4232828 | 4242604 NM_011944    | chr8        | 4241107 | 4242061 |
|          | 13 | 3847514 | 3856013 NM_001008706 | chr13       | 3851934 | 3852900 |
|          | 11 | 3789250 | 3797783 NM_173745    | chr11       | 3796528 | 3797333 |
|          | 11 | 3792602 | 3801101 NM_026150    | chr11       | 3796528 | 3797333 |
|          | 16 | 3793911 | 3802410 NM_029090    | chr16       | 3795948 | 3796708 |
|          | 8  | 3746431 | 3754984 NM_133238    | chr8        | 3753038 | 3754172 |
|          | 19 | 3343188 | 3351687 BC046383     | chr19       | 3345749 | 3346656 |
|          | 7  | 3242439 | 3251094 NM_146176    | chr7        | 3247251 | 3248080 |
| X        |    | 3241098 | 3249629 BC089532     | chrX        | 3241473 | 3242062 |
|          | 11 | 3090915 | 3099463 BC046305     | chr11       | 3097688 | 3098373 |
|          | 11 | 3096395 | 3105264 NM_023743    | chr11       | 3097688 | 3098373 |
|          | 11 | 3090915 | 3099463 BC046305     | chr11       | 3095878 | 3097086 |
|          | 11 | 3096395 | 3105264 NM_023743    | chr11       | 3095878 | 3097086 |
|          | 11 | 3090915 | 3099463 BC046305     | chr11       | 3093222 | 3094310 |
|          | 11 | 3090915 | 3099463 BC046305     | chr11       | 3091251 | 3092126 |
|          | 11 | 3042349 | 3050848 BC048950     | chr11       | 3049477 | 3050458 |
|          | 11 | 3042349 | 3050848 BC048950     | chr11       | 3048098 | 3048872 |
|          | 11 | 3042349 | 3050848 BC048950     | chr11       | 3041998 | 3043357 |
|          | 11 | 3018018 | 3032526 NM_001004146 | chr11       | 3029167 | 3031395 |
| Y_random |    | 2540325 | 2550162 L04849       | chrY_random | 2545587 | 2546179 |
| Y_random |    | 1402748 | 1411247 NM_001037748 | chrY_random | 1404319 | 1405014 |

| gene overlap percent | region overlap percent | length(bps) | probes in region | p-value(region) |            |
|----------------------|------------------------|-------------|------------------|-----------------|------------|
| 0.0694108            |                        | 1           | 602              | 17              | 0.0259     |
| 0.102824             |                        | 1           | 874              | 19              | 0.0170106  |
| 0.0558824            |                        | 1           | 475              | 13              | 0.00651472 |
| 0.0709412            |                        | 1           | 603              | 17              | 0.00652354 |
| 0.0434497            |                        | 1           | 662              | 18              | 0.021239   |
| 0.0558545            |                        | 1           | 737              | 21              | 0.012897   |
| 0.0525265            |                        | 1           | 684              | 37              | 0.0085627  |
| 0.132833             |                        | 1           | 1132             | 31              | 0.0179905  |
| 0.116                |                        | 1           | 986              | 28              | 0.0109903  |
| 0.122824             |                        | 1           | 1044             | 24              | 0.0117494  |
| 0.0432508            |                        | 1           | 587              | 17              | 0.0285041  |
| 0.0865882            |                        | 1           | 736              | 20              | 0.0269063  |
| 0.0848988            |                        | 1           | 940              | 26              | 0.0154305  |
| 0.0827174            |                        | 1           | 705              | 18              | 0.0268533  |
| 0.136471             |                        | 1           | 1160             | 31              | 0.0179817  |
| 0.109765             |                        | 1           | 933              | 19              | 0.0174608  |
| 0.0725257            |                        | 1           | 713              | 20              | 0.0181582  |
| 0.0949412            |                        | 1           | 807              | 21              | 0.0186967  |
| 0.0628007            |                        | 1           | 731              | 21              | 0.0192175  |
| 0.101765             |                        | 1           | 865              | 25              | 0.0183171  |
| 0.0699719            |                        | 1           | 597              | 17              | 0.0219364  |
| 0.0691558            |                        | 1           | 589              | 10              | 0.0252114  |
| 0.0416693            |                        | 1           | 649              | 14              | 0.0197295  |
| 0.0513644            |                        | 1           | 800              | 21              | 0.0235783  |
| 0.0715371            |                        | 1           | 612              | 16              | 0.0224396  |
| 0.0964706            | 0.996355               |             | 823              | 19              | 0.0189351  |
| 0.0446792            |                        | 1           | 702              | 20              | 0.0205946  |
| 0.104706             |                        | 1           | 890              | 25              | 0.0116788  |
| 0.0863529            |                        | 1           | 734              | 19              | 0.022369   |
| 0.132824             |                        | 1           | 1129             | 31              | 0.016481   |
| 0.0965882            |                        | 1           | 821              | 23              | 0.0173549  |
| 0.096                |                        | 1           | 816              | 21              | 0.0182024  |
| 0.074                |                        | 1           | 629              | 12              | 0.0264561  |
| 0.0835294            |                        | 1           | 710              | 20              | 0.0119172  |
| 0.0935294            |                        | 1           | 795              | 20              | 0.0109373  |
| 0.107155             |                        | 1           | 918              | 23              | 0.0137092  |
| 0.0627991            |                        | 1           | 538              | 13              | 0.0290779  |
| 0.0729768            |                        | 1           | 670              | 15              | 0.0267386  |
| 0.0780704            |                        | 1           | 670              | 15              | 0.0267386  |
| 0.0694118            |                        | 1           | 590              | 17              | 0.0259     |
| 0.0991765            |                        | 1           | 843              | 24              | 0.0159602  |
| 0.0888235            |                        | 1           | 755              | 19              | 0.0150333  |
| 0.104471             |                        | 1           | 888              | 21              | 0.0146625  |
| 0.07                 |                        | 1           | 595              | 17              | 0.0294222  |

|           |          |      |    |            |
|-----------|----------|------|----|------------|
| 0.0676328 | 1        | 588  | 17 | 0.028919   |
| 0.0690943 | 1        | 592  | 11 | 0.0181582  |
| 0.0692398 | 1        | 592  | 17 | 0.0291132  |
| 0.127348  | 1        | 1139 | 32 | 0.0162162  |
| 0.0729412 | 1        | 620  | 18 | 0.0287159  |
| 0.0804706 | 1        | 684  | 19 | 0.026871   |
| 0.0842499 | 1        | 720  | 20 | 0.0170283  |
| 0.0847059 | 1        | 720  | 20 | 0.0170283  |
| 0.0743529 | 1        | 632  | 13 | 0.0274536  |
| 0.0690588 | 0.928797 | 632  | 13 | 0.0274536  |
| 0.127059  | 1        | 1080 | 31 | 0.0197737  |
| 0.0659375 | 1        | 627  | 16 | 0.0246112  |
| 0.0725929 | 1        | 619  | 14 | 0.0254586  |
| 0.0717304 | 1        | 611  | 16 | 0.0197119  |
| 0.0692814 | 0.96563  | 611  | 16 | 0.0197119  |
| 0.0492406 | 1        | 629  | 18 | 0.0268269  |
| 0.0732769 | 1        | 623  | 17 | 0.0213096  |
| 0.104818  | 1        | 892  | 25 | 0.0171431  |
| 0.0995454 | 1        | 854  | 23 | 0.0159513  |
| 0.0827846 | 1        | 704  | 19 | 0.0284335  |
| 0.0811478 | 1        | 690  | 19 | 0.0247524  |
| 0.0741176 | 1        | 630  | 15 | 0.0259     |
| 0.0493747 | 1        | 683  | 19 | 0.0244964  |
| 0.0625585 | 1        | 802  | 23 | 0.0263766  |
| 0.0902353 | 1        | 767  | 20 | 0.0261471  |
| 0.0690058 | 1        | 590  | 17 | 0.0283982  |
| 0.102353  | 1        | 870  | 21 | 0.0177786  |
| 0.0724289 | 1        | 693  | 20 | 0.017196   |
| 0.0727804 | 1        | 623  | 12 | 0.0246376  |
| 0.0717647 | 1        | 610  | 17 | 0.0253968  |
| 0.0502617 | 1        | 989  | 28 | 0.0261825  |
| 0.0538669 | 1        | 459  | 13 | 0.0260324  |
| 0.0662353 | 1        | 563  | 16 | 0.0279038  |
| 0.06955   | 1        | 595  | 17 | 0.0288395  |
| 0.0435905 | 1        | 574  | 12 | 0.00796243 |
| 0.0316471 | 0.445364 | 604  | 17 | 0.0250878  |
| 0.0646288 | 1        | 666  | 19 | 0.0233312  |
| 0.0438824 | 1        | 373  | 11 | 0.0195265  |
| 0.0727465 | 1        | 619  | 18 | 0.0253262  |
| 0.0650106 | 1        | 615  | 13 | 0.0199767  |
| 0.0530588 | 1        | 451  | 13 | 0.022828   |
| 0.09563   | 1        | 976  | 26 | 0.0196236  |
| 0.112118  | 1        | 953  | 24 | 0.0137092  |
| 0.0661176 | 1        | 562  | 15 | 0.0299959  |
| 0.0661176 | 1        | 562  | 15 | 0.0299959  |
| 0.0761176 | 1        | 647  | 18 | 0.0295987  |
| 0.0787851 | 1        | 677  | 19 | 0.0188556  |

|            |           |      |    |            |
|------------|-----------|------|----|------------|
| 0.0664309  | 1         | 601  | 17 | 0.0296164  |
| 0.110471   | 1         | 939  | 26 | 0.015148   |
| 0.0807059  | 1         | 686  | 19 | 0.00912766 |
| 0.0702043  | 1         | 598  | 17 | 0.0286012  |
| 0.0969412  | 1         | 824  | 23 | 0.0269328  |
| 0.0791325  | 1         | 675  | 19 | 0.0196324  |
| 0.0295858  | 1         | 420  | 12 | 0.0287071  |
| 0.0762353  | 1         | 648  | 17 | 0.0244964  |
| 0.0192828  | 0.149635  | 1096 | 31 | 0.0140269  |
| 0.126808   | 1         | 1096 | 31 | 0.0140269  |
| 0.116862   | 1         | 998  | 25 | 0.0190763  |
| 0.116588   | 1         | 991  | 27 | 0.00918063 |
| 0.0710588  | 1         | 604  | 17 | 0.0296428  |
| 0.0442353  | 1         | 376  | 11 | 0.0151304  |
| 0.0771761  | 1         | 657  | 19 | 0.0254763  |
| 0.105882   | 1         | 900  | 18 | 0.0258911  |
| 0.0762873  | 1         | 683  | 19 | 0.0231281  |
| 0.0703996  | 1         | 606  | 17 | 0.0293604  |
| 0.109765   | 1         | 933  | 24 | 0.011873   |
| 0.0945914  | 1         | 808  | 23 | 0.019041   |
| 0.123059   | 1         | 1046 | 26 | 0.012182   |
| 0.0990665  | 1         | 849  | 19 | 0.0186791  |
| 0.0998471  | 1         | 849  | 19 | 0.0186791  |
| 0.0805882  | 1         | 685  | 15 | 0.0236754  |
| 0.093651   | 1         | 798  | 22 | 0.0236931  |
| 0.0455881  | 1         | 388  | 11 | 0.0273565  |
| 0.0855163  | 1         | 728  | 18 | 0.01423    |
| 0.0852858  | 1         | 728  | 18 | 0.01423    |
| 0.0725419  | 1         | 619  | 14 | 0.0257411  |
| 0.108645   | 1         | 940  | 20 | 0.0108049  |
| 0.0775049  | 1         | 666  | 14 | 0.0249289  |
| 0.0650588  | 0.83033   | 666  | 14 | 0.0249289  |
| 0.00101652 | 0.0128205 | 936  | 26 | 0.0254763  |
| 0.110118   | 1         | 936  | 26 | 0.0254763  |
| 0.102353   | 1         | 870  | 17 | 0.0251496  |
| 0.082659   | 1         | 715  | 20 | 0.0241521  |
| 0.0856471  | 1         | 728  | 20 | 0.0177522  |
| 0.0696129  | 1         | 597  | 15 | 0.0247524  |
| 0.0369884  | 0.647871  | 869  | 32 | 0.0144683  |
| 0.0571148  | 0.673102  | 777  | 21 | 0.0193146  |
| 0.079827   | 1         | 683  | 19 | 0.0187144  |
| 0.0415522  | 1         | 696  | 13 | 0.0186967  |
| 0.0978161  | 1         | 851  | 23 | 0.0245847  |
| 0.08831    | 1         | 800  | 22 | 0.0288395  |
| 0.0698824  | 1         | 594  | 13 | 0.0271446  |
| 0.0762543  | 1         | 649  | 18 | 0.0253615  |
| 0.102824   | 1         | 874  | 25 | 0.0119966  |



|           |          |      |    |            |
|-----------|----------|------|----|------------|
| 0.0719577 | 1        | 612  | 17 | 0.026871   |
| 0.0685882 | 1        | 583  | 10 | 0.0159513  |
| 0.0725882 | 1        | 617  | 14 | 0.00868629 |
| 0.0752941 | 1        | 640  | 18 | 0.0266415  |
| 0.0751765 | 1        | 639  | 13 | 0.0199767  |
| 0.068791  | 1        | 598  | 17 | 0.0264738  |
| 0.0834118 | 1        | 709  | 20 | 0.0173549  |
| 0.0697647 | 1        | 593  | 17 | 0.0288219  |
| 0.0762271 | 1        | 674  | 19 | 0.0219805  |
| 0.0745882 | 1        | 634  | 18 | 0.0259971  |
| 0.0919567 | 1        | 782  | 16 | 0.0170283  |
| 0.0733026 | 1        | 637  | 14 | 0.0107343  |
| 0.0602587 | 1        | 983  | 27 | 0.0265532  |
| 0.0786674 | 1        | 673  | 19 | 0.0164898  |
| 0.0683529 | 1        | 581  | 12 | 0.0261736  |
| 0.106118  | 1        | 902  | 20 | 0.0178404  |
| 0.129765  | 1        | 1103 | 30 | 0.0145478  |
| 0.0871765 | 1        | 741  | 21 | 0.0179728  |
| 0.041425  | 1        | 600  | 13 | 0.0288484  |
| 0.0723807 | 1        | 619  | 13 | 0.0275948  |
| 0.0725882 | 1        | 617  | 17 | 0.0282393  |
| 0.10425   | 1        | 888  | 23 | 0.0258382  |
| 0.0697756 | 1        | 597  | 16 | 0.0286983  |
| 0.0674626 | 1        | 582  | 17 | 0.0269504  |
| 0.0483871 | 1        | 753  | 21 | 0.0252732  |
| 0.0739758 | 1        | 948  | 14 | 0.0133914  |
| 0.0252941 | 0.226793 | 948  | 14 | 0.0133914  |
| 0.0694118 | 1        | 590  | 17 | 0.0279568  |
| 0.125882  | 1        | 1070 | 27 | 0.012641   |
| 0.125161  | 1        | 1070 | 27 | 0.012641   |
| 0.0708235 | 1        | 602  | 17 | 0.0277449  |
| 0.0944706 | 1        | 803  | 23 | 0.0195265  |
| 0.0781073 | 1        | 690  | 19 | 0.0264031  |
| 0.0804706 | 1        | 684  | 17 | 0.0152275  |
| 0.0729412 | 1        | 620  | 17 | 0.029687   |
| 0.0956471 | 1        | 813  | 23 | 0.0170901  |
| 0.0744706 | 1        | 633  | 18 | 0.0295987  |
| 0.139032  | 1        | 1184 | 32 | 0.0132148  |
| 0.0363006 | 1        | 597  | 13 | 0.0258911  |
| 0.07      | 1        | 595  | 17 | 0.0219629  |
| 0.0691765 | 1        | 588  | 17 | 0.0256705  |
| 0.0649372 | 1        | 776  | 17 | 0.0196854  |
| 0.113059  | 1        | 961  | 27 | 0.0189351  |
| 0.0716471 | 1        | 609  | 16 | 0.028354   |
| 0.0931765 | 1        | 792  | 22 | 0.0228456  |
| 0.0970588 | 1        | 825  | 21 | 0.0177875  |
| 0.060105  | 1        | 607  | 17 | 0.0279303  |

|           |          |      |    |            |
|-----------|----------|------|----|------------|
| 0.0889175 | 1        | 759  | 21 | 0.0241521  |
| 0.0707306 | 0.801054 | 759  | 21 | 0.0241521  |
| 0.0810588 | 1        | 689  | 18 | 0.0164369  |
| 0.0731765 | 1        | 622  | 18 | 0.0295546  |
| 0.0702785 | 1        | 598  | 17 | 0.0268533  |
| 0.0222885 | 1        | 635  | 18 | 0.0283805  |
| 0.0934118 | 1        | 794  | 22 | 0.0163751  |
| 0.0724706 | 1        | 616  | 16 | 0.0259     |
| 0.0353017 | 1        | 599  | 16 | 0.0253174  |
| 0.0526285 | 1        | 893  | 24 | 0.0129323  |
| 0.0886433 | 1        | 754  | 21 | 0.0194206  |
| 0.0364539 | 1        | 602  | 17 | 0.0278332  |
| 0.0976471 | 1        | 830  | 23 | 0.0151304  |
| 0.0958824 | 1        | 815  | 23 | 0.0235342  |
| 0.0704706 | 1        | 599  | 13 | 0.0146802  |
| 0.0778583 | 1        | 666  | 19 | 0.0237019  |
| 0.0828235 | 1        | 704  | 20 | 0.0278597  |
| 0.0445942 | 1        | 622  | 17 | 0.0268622  |
| 0.107412  | 1        | 913  | 26 | 0.0114052  |
| 0.0851654 | 1        | 798  | 22 | 0.0171254  |
| 0.0418916 | 1        | 357  | 10 | 0.0296075  |
| 0.0974118 | 1        | 828  | 23 | 0.0149538  |
| 0.0721492 | 1        | 615  | 14 | 0.0245935  |
| 0.0529391 | 1        | 453  | 13 | 0.0192705  |
| 0.0584706 | 1        | 497  | 14 | 0.0290249  |
| 0.0744706 | 1        | 633  | 13 | 0.0112639  |
| 0.0838824 | 1        | 713  | 19 | 0.0188379  |
| 0.0718824 | 1        | 611  | 17 | 0.0264031  |
| 0.10227   | 1        | 874  | 24 | 0.0120231  |
| 0.0507921 | 1        | 606  | 17 | 0.0252556  |
| 0.0575294 | 1        | 489  | 13 | 0.0281157  |
| 0.0508644 | 1        | 612  | 17 | 0.0296075  |
| 0.094404  | 1        | 803  | 20 | 0.0249996  |
| 0.074283  | 1        | 632  | 18 | 0.0225632  |
| 0.0411303 | 1        | 639  | 12 | 0.0258294  |
| 0.0643609 | 1        | 642  | 18 | 0.0255557  |
| 0.109478  | 1        | 931  | 23 | 0.00841263 |
| 0.0766167 | 1        | 654  | 19 | 0.0270652  |
| 0.0730998 | 1        | 1056 | 29 | 0.0089158  |
| 0.083833  | 1        | 713  | 20 | 0.0130471  |
| 0.0922518 | 1        | 787  | 21 | 0.0183966  |
| 0.100824  | 1        | 857  | 23 | 0.0119436  |
| 0.0706394 | 1        | 601  | 17 | 0.0257852  |
| 0.0711765 | 1        | 605  | 17 | 0.0252291  |
| 0.0692079 | 1        | 699  | 20 | 0.02206    |
| 0.0338288 | 1        | 503  | 14 | 0.0297488  |
| 0.0621176 | 1        | 528  | 15 | 0.0131442  |

|           |         |      |    |            |
|-----------|---------|------|----|------------|
| 0.0741176 | 1       | 630  | 18 | 0.0298812  |
| 0.087283  | 1       | 744  | 16 | 0.0261648  |
| 0.0797647 | 1       | 678  | 18 | 0.0237019  |
| 0.0663529 | 1       | 564  | 16 | 0.0255734  |
| 0.0547437 | 1       | 753  | 17 | 0.0180258  |
| 0.068997  | 1       | 604  | 16 | 0.0264384  |
| 0.0675369 | 1       | 595  | 11 | 0.0277891  |
| 0.0710588 | 0.94081 | 642  | 11 | 0.010699   |
| 0.0473191 | 1       | 616  | 17 | 0.0244964  |
| 0.073982  | 1       | 714  | 19 | 0.0285747  |
| 0.0592653 | 1       | 505  | 14 | 0.0264738  |
| 0.0363362 | 1       | 601  | 13 | 0.0152451  |
| 0.0688828 | 1       | 603  | 15 | 0.0296517  |
| 0.0357121 | 1       | 596  | 17 | 0.0253438  |
| 0.0621704 | 1       | 955  | 21 | 0.0136474  |
| 0.0815058 | 1       | 695  | 19 | 0.0262619  |
| 0.0723529 | 1       | 615  | 14 | 0.0150333  |
| 0.106267  | 1       | 958  | 23 | 0.0179199  |
| 0.0724706 | 1       | 616  | 10 | 0.0236578  |
| 0.0733514 | 1       | 624  | 18 | 0.025132   |
| 0.0841176 | 1       | 715  | 20 | 0.0144683  |
| 0.0967059 | 1       | 822  | 23 | 0.0268269  |
| 0.0348434 | 1       | 583  | 17 | 0.0270211  |
| 0.0789845 | 1       | 672  | 19 | 0.0234459  |
| 0.08467   | 1       | 739  | 21 | 0.0245847  |
| 0.0709078 | 1       | 603  | 10 | 0.0262442  |
| 0.0695125 | 1       | 596  | 17 | 0.0291926  |
| 0.0698619 | 1       | 602  | 13 | 0.0264649  |
| 0.0796471 | 1       | 677  | 20 | 0.0281422  |
| 0.0791765 | 1       | 673  | 19 | 0.0188556  |
| 0.104     | 1       | 884  | 25 | 0.0189439  |
| 0.0925882 | 1       | 787  | 18 | 0.0223336  |
| 0.0570588 | 1       | 485  | 14 | 0.0247436  |
| 0.0705882 | 1       | 600  | 17 | 0.0242845  |
| 0.0587292 | 1       | 586  | 17 | 0.0271446  |
| 0.0874656 | 1       | 762  | 22 | 0.0218393  |
| 0.0742353 | 1       | 631  | 14 | 0.0158013  |
| 0.0711765 | 1       | 605  | 17 | 0.028919   |
| 0.119412  | 1       | 1015 | 27 | 0.00803305 |
| 0.061465  | 1       | 605  | 17 | 0.0273388  |
| 0.0727059 | 1       | 618  | 13 | 0.0174344  |
| 0.0736471 | 1       | 626  | 18 | 0.0271711  |
| 0.0852239 | 1       | 725  | 16 | 0.0227132  |
| 0.0715294 | 1       | 608  | 15 | 0.0281157  |
| 0.136471  | 1       | 1160 | 33 | 0.0112286  |
| 0.067758  | 1       | 803  | 23 | 0.0195795  |
| 0.0736794 | 1       | 643  | 18 | 0.0260324  |

|           |          |      |    |            |
|-----------|----------|------|----|------------|
| 0.0589648 | 1        | 835  | 22 | 0.0228015  |
| 0.0956133 | 1        | 813  | 23 | 0.0259088  |
| 0.0695294 | 1        | 591  | 17 | 0.0293957  |
| 0.0718824 | 1        | 611  | 17 | 0.026871   |
| 0.0990412 | 1        | 847  | 24 | 0.0249113  |
| 0.0696471 | 1        | 592  | 12 | 0.0281598  |
| 0.0757509 | 1        | 691  | 15 | 0.0281157  |
| 0.07      | 1        | 595  | 17 | 0.0272682  |
| 0.0556332 | 1        | 836  | 24 | 0.0242051  |
| 0.0738041 | 1        | 648  | 19 | 0.0192617  |
| 0.0468235 | 1        | 398  | 11 | 0.0297223  |
| 0.0360548 | 1        | 590  | 17 | 0.0173549  |
| 0.0711765 | 1        | 605  | 11 | 0.0247524  |
| 0.110706  | 1        | 941  | 19 | 0.0285924  |
| 0.110941  | 1        | 943  | 27 | 0.00923359 |
| 0.0446607 | 0.431484 | 883  | 21 | 0.018017   |
| 0.0763247 | 1        | 883  | 21 | 0.018017   |
| 0.0590054 | 1        | 935  | 26 | 0.0150951  |
| 0.11      | 1        | 935  | 26 | 0.0150951  |
| 0.0512432 | 1        | 812  | 22 | 0.0192617  |
| 0.0712468 | 1        | 616  | 12 | 0.0277273  |
| 0.0834118 | 1        | 709  | 20 | 0.0195265  |
| 0.0844888 | 1        | 719  | 20 | 0.023799   |
| 0.115059  | 1        | 978  | 21 | 0.0120672  |
| 0.0843529 | 1        | 717  | 20 | 0.0253262  |
| 0.058     | 1        | 493  | 14 | 0.0246112  |
| 0.0697538 | 1        | 595  | 13 | 0.0284335  |
| 0.0741176 | 1        | 630  | 18 | 0.0232517  |
| 0.105803  | 1        | 908  | 18 | 0.0286453  |
| 0.0484223 | 0.878855 | 908  | 18 | 0.0286453  |
| 0.0950141 | 1        | 808  | 23 | 0.0176639  |
| 0.0660708 | 1        | 584  | 15 | 0.0296075  |
| 0.0736189 | 1        | 629  | 15 | 0.0233312  |
| 0.073861  | 1        | 629  | 15 | 0.0233312  |
| 0.0790541 | 1        | 682  | 19 | 0.0233753  |
| 0.0604472 | 0.760997 | 682  | 19 | 0.0233753  |
| 0.0807059 | 1        | 686  | 19 | 0.0251938  |
| 0.0788235 | 1        | 670  | 19 | 0.0225632  |
| 0.0716471 | 1        | 609  | 17 | 0.029069   |
| 0.0814138 | 1        | 1283 | 33 | 0.00944545 |
| 0.0653228 | 0.996711 | 608  | 17 | 0.0259529  |
| 0.101427  | 1        | 867  | 24 | 0.0260147  |
| 0.0598731 | 1        | 604  | 17 | 0.0268004  |
| 0.0890636 | 1        | 759  | 20 | 0.0262619  |
| 0.129294  | 1        | 1099 | 29 | 0.0154835  |
| 0.129294  | 1        | 1099 | 29 | 0.0154835  |
| 0.0486991 | 1        | 642  | 18 | 0.0193853  |

|           |   |      |    |            |
|-----------|---|------|----|------------|
| 0.0723529 | 1 | 615  | 17 | 0.0215833  |
| 0.111823  | 1 | 1047 | 23 | 0.0129412  |
| 0.0890506 | 1 | 771  | 20 | 0.0149538  |
| 0.0747059 | 1 | 635  | 18 | 0.0188821  |
| 0.0722652 | 1 | 617  | 16 | 0.0280627  |
| 0.0757079 | 1 | 647  | 18 | 0.025026   |
| 0.0728235 | 1 | 619  | 12 | 0.0284864  |
| 0.0320169 | 1 | 908  | 26 | 0.00963966 |
| 0.0222849 | 1 | 632  | 18 | 0.0245758  |
| 0.0797647 | 1 | 678  | 19 | 0.0177963  |
| 0.0707934 | 1 | 605  | 12 | 0.0280804  |
| 0.0326564 | 1 | 714  | 20 | 0.0231546  |
| 0.0415347 | 1 | 669  | 14 | 0.0186261  |
| 0.0407276 | 1 | 656  | 15 | 0.0212214  |
| 0.0703028 | 1 | 620  | 16 | 0.0285217  |
| 0.0765882 | 1 | 651  | 18 | 0.0264826  |
| 0.0735363 | 1 | 628  | 13 | 0.0155541  |
| 0.0671304 | 1 | 608  | 15 | 0.02605    |
| 0.120287  | 1 | 1024 | 27 | 0.0177168  |
| 0.118656  | 1 | 1024 | 27 | 0.0177168  |
| 0.073447  | 1 | 629  | 18 | 0.0233312  |
| 0.0765882 | 1 | 651  | 19 | 0.025847   |
| 0.0695294 | 1 | 591  | 16 | 0.0233576  |
| 0.0844348 | 1 | 741  | 21 | 0.0267562  |
| 0.069286  | 1 | 589  | 14 | 0.0279744  |
| 0.0757647 | 1 | 644  | 15 | 0.0271711  |
| 0.0476471 | 1 | 405  | 11 | 0.0241345  |
| 0.071035  | 1 | 606  | 10 | 0.0211772  |
| 0.0918824 | 1 | 781  | 21 | 0.0201268  |
| 0.0444706 | 1 | 378  | 11 | 0.027639   |
| 0.100706  | 1 | 856  | 24 | 0.018988   |
| 0.0698824 | 1 | 594  | 17 | 0.021292   |
| 0.0948094 | 1 | 811  | 23 | 0.0219894  |
| 0.125338  | 1 | 1067 | 29 | 0.0112639  |
| 0.0741219 | 1 | 631  | 18 | 0.0240727  |
| 0.0535629 | 1 | 672  | 19 | 0.0283805  |
| 0.0867059 | 1 | 737  | 20 | 0.0024364  |
| 0.0613568 | 1 | 530  | 15 | 0.0251496  |
| 0.0454849 | 1 | 681  | 37 | 0.0264031  |
| 0.114353  | 1 | 972  | 27 | 0.0175138  |
| 0.0498459 | 1 | 469  | 10 | 0.0296781  |
| 0.0711765 | 1 | 605  | 14 | 0.0243022  |
| 0.0711012 | 1 | 605  | 14 | 0.0243022  |
| 0.0473468 | 1 | 820  | 17 | 0.024311   |
| 0.108716  | 1 | 1150 | 27 | 0.0113434  |
| 0.0373495 | 1 | 602  | 17 | 0.0259     |
| 0.0930588 | 1 | 791  | 19 | 0.024567   |

|           |          |   |      |    |            |
|-----------|----------|---|------|----|------------|
| 0.10201   |          | 1 | 873  | 25 | 0.0255998  |
| 0.105954  |          | 1 | 920  | 24 | 0.0195     |
| 0.0393628 | 0.531153 |   | 642  | 18 | 0.0245229  |
| 0.0752903 |          | 1 | 642  | 18 | 0.0245229  |
| 0.071356  |          | 1 | 632  | 18 | 0.0254145  |
| 0.0277008 |          | 1 | 690  | 16 | 0.0232341  |
| 0.104044  |          | 1 | 885  | 25 | 0.0183524  |
| 0.0920409 |          | 1 | 828  | 19 | 0.0214774  |
| 0.0364472 |          | 1 | 531  | 15 | 0.0283452  |
| 0.0624706 |          | 1 | 531  | 15 | 0.0283452  |
| 0.0768239 |          | 1 | 775  | 22 | 0.0170106  |
| 0.112     |          | 1 | 952  | 27 | 0.0095867  |
| 0.0962353 |          | 1 | 818  | 22 | 0.0227574  |
| 0.114588  |          | 1 | 974  | 23 | 0.0181317  |
| 0.0848235 |          | 1 | 721  | 13 | 0.0229604  |
| 0.0716446 |          | 1 | 616  | 15 | 0.0263766  |
| 0.0707059 |          | 1 | 601  | 15 | 0.0275066  |
| 0.0681176 |          | 1 | 579  | 10 | 0.028919   |
| 0.0722353 |          | 1 | 614  | 13 | 0.00783002 |
| 0.121281  |          | 1 | 1064 | 29 | 0.00948959 |
| 0.0669556 |          | 1 | 618  | 17 | 0.0294486  |
| 0.0653495 |          | 1 | 559  | 16 | 0.0242845  |
| 0.0421176 |          | 1 | 358  | 10 | 0.0299077  |
| 0.0384706 | 0.756944 |   | 432  | 12 | 0.0264738  |
| 0.112824  |          | 1 | 959  | 27 | 0.0144153  |
| 0.111099  |          | 1 | 995  | 28 | 0.0171431  |
| 0.0725504 |          | 1 | 619  | 18 | 0.0241168  |
| 0.0811765 |          | 1 | 690  | 13 | 0.0252732  |
| 0.0595294 |          | 1 | 506  | 14 | 0.0298017  |
| 0.107765  |          | 1 | 916  | 24 | 0.01423    |
| 0.0520952 |          | 1 | 731  | 21 | 0.0251585  |
| 0.0737743 |          | 1 | 629  | 18 | 0.0284864  |
| 0.0895294 |          | 1 | 761  | 21 | 0.0254763  |
| 0.07052   |          | 1 | 632  | 18 | 0.0232605  |
| 0.0795294 |          | 1 | 676  | 19 | 0.0257587  |
| 0.0555294 |          | 1 | 472  | 10 | 0.0299077  |
| 0.0723529 |          | 1 | 615  | 18 | 0.0279921  |
| 0.109035  |          | 1 | 928  | 26 | 0.0250702  |
| 0.109294  |          | 1 | 929  | 24 | 0.00874808 |
| 0.0874118 |          | 1 | 743  | 21 | 0.0193676  |
| 0.103059  |          | 1 | 876  | 24 | 0.0230398  |
| 0.101081  |          | 1 | 860  | 21 | 0.0193853  |
| 0.0739304 |          | 1 | 629  | 17 | 0.0267386  |
| 0.0638611 |          | 1 | 607  | 17 | 0.0281245  |
| 0.0864934 |          | 1 | 739  | 21 | 0.0194294  |
| 0.0748235 |          | 1 | 636  | 18 | 0.0201709  |
| 0.129647  |          | 1 | 1102 | 29 | 0.00800657 |

|           |          |      |    |            |
|-----------|----------|------|----|------------|
| 0.110802  | 1        | 955  | 27 | 0.0206211  |
| 0.062448  | 1        | 1351 | 33 | 0.00466976 |
| 0.0195526 | 1        | 423  | 11 | 0.020577   |
| 0.0550985 | 1        | 1192 | 26 | 0.00343391 |
| 0.049918  | 1        | 426  | 11 | 0.0248142  |
| 0.0958824 | 1        | 815  | 16 | 0.0167811  |
| 0.0843936 | 1        | 723  | 16 | 0.0174079  |
| 0.105721  | 1        | 900  | 25 | 0.0161367  |
| 0.0702455 | 1        | 598  | 15 | 0.0223248  |
| 0.0718556 | 1        | 613  | 15 | 0.0296428  |
| 0.0700786 | 1        | 597  | 17 | 0.0296428  |
| 0.11938   | 1        | 1017 | 27 | 0.0133737  |
| 0.0927059 | 1        | 788  | 22 | 0.024823   |
| 0.0354226 | 1        | 629  | 17 | 0.0264738  |
| 0.0705882 | 1        | 600  | 17 | 0.0297046  |
| 0.107466  | 1        | 914  | 26 | 0.0151304  |
| 0.0816216 | 1        | 755  | 21 | 0.0239226  |
| 0.0722353 | 1        | 614  | 16 | 0.0224572  |
| 0.0687059 | 0.837877 | 697  | 20 | 0.0227662  |
| 0.0462353 | 1        | 393  | 12 | 0.0297488  |
| 0.0832757 | 1        | 722  | 16 | 0.0183789  |
| 0.100824  | 1        | 857  | 22 | 0.019041   |
| 0.0506229 | 1        | 642  | 18 | 0.0252732  |
| 0.0758824 | 1        | 645  | 18 | 0.0246376  |
| 0.0912438 | 1        | 1016 | 26 | 0.0210007  |
| 0.0279314 | 1        | 1187 | 31 | 0.011361   |
| 0.0189425 | 1        | 805  | 21 | 0.0154305  |
| 0.0904706 | 1        | 769  | 22 | 0.0127558  |
| 0.0761176 | 1        | 647  | 18 | 0.0216981  |
| 0.0954944 | 1        | 816  | 21 | 0.0185202  |
| 0.0769591 | 1        | 658  | 19 | 0.0269063  |
| 0.0894118 | 1        | 760  | 21 | 0.0235165  |
| 0.11051   | 1        | 940  | 26 | 0.00209212 |
| 0.0711765 | 1        | 605  | 17 | 0.0299077  |
| 0.0796471 | 1        | 677  | 15 | 0.0293427  |
| 0.041623  | 1        | 636  | 16 | 0.0168606  |
| 0.0729448 | 1        | 622  | 12 | 0.0259794  |
| 0.115119  | 1        | 999  | 25 | 0.0167635  |
| 0.121141  | 1        | 1032 | 29 | 0.0132325  |
| 0.0781468 | 1        | 673  | 15 | 0.0201709  |
| 0.0751676 | 1        | 639  | 18 | 0.0290602  |
| 0.0775294 | 1        | 659  | 15 | 0.0155806  |
| 0.0945882 | 1        | 804  | 22 | 0.0263413  |
| 0.0690588 | 1        | 587  | 15 | 0.0255292  |
| 0.0427876 | 1        | 369  | 10 | 0.0281775  |
| 0.0728235 | 1        | 619  | 18 | 0.0278508  |
| 0.109176  | 1        | 928  | 25 | 0.0197295  |

|            |          |      |    |            |
|------------|----------|------|----|------------|
| 0.0450674  | 1        | 635  | 18 | 0.0252291  |
| 0.0459331  | 1        | 637  | 18 | 0.0259     |
| 0.0709354  | 1        | 637  | 18 | 0.0259     |
| 0.0537177  | 1        | 846  | 24 | 0.0173549  |
| 0.0612674  | 1        | 525  | 15 | 0.0197207  |
| 0.1        | 1        | 850  | 23 | 0.0226073  |
| 0.0832656  | 1        | 717  | 15 | 0.0198531  |
| 0.108493   | 1        | 944  | 27 | 0.0131177  |
| 0.069555   | 1        | 594  | 14 | 0.0298459  |
| 0.0791942  | 1        | 684  | 19 | 0.0251761  |
| 0.0755294  | 1        | 642  | 18 | 0.0267297  |
| 0.121529   | 1        | 1033 | 24 | 0.0188997  |
| 0.0808235  | 1        | 687  | 19 | 0.0252732  |
| 0.10016    | 1        | 874  | 22 | 0.0216451  |
| 0.0972941  | 1        | 827  | 23 | 0.0191999  |
| 0.00988235 | 0.138843 | 605  | 12 | 0.0256793  |
| 0.0804368  | 1        | 685  | 19 | 0.0216451  |
| 0.080239   | 1        | 685  | 19 | 0.0216451  |
| 0.0386433  | 1        | 916  | 26 | 0.0259794  |
| 0.0695273  | 1        | 606  | 16 | 0.0275595  |
| 0.100123   | 1        | 893  | 20 | 0.0255557  |
| 0.0573263  | 1        | 491  | 13 | 0.0272417  |
| 0.0496691  | 1        | 608  | 17 | 0.0287159  |
| 0.109806   | 1        | 935  | 26 | 0.0230575  |
| 0.0470756  | 1        | 528  | 15 | 0.0276566  |
| 0.0698803  | 1        | 619  | 12 | 0.0252026  |
| 0.124614   | 1        | 1090 | 28 | 0.0178757  |
| 0.127904   | 1        | 1090 | 28 | 0.0178757  |
| 0.0702469  | 1        | 811  | 23 | 0.00871277 |
| 0.0949188  | 1        | 1076 | 27 | 0.00707085 |
| 0.0649412  | 1        | 552  | 14 | 0.0278773  |
| 0.0510867  | 1        | 590  | 16 | 0.0292809  |
| 0.123176   | 1        | 1047 | 22 | 0.0140623  |
| 0.0471674  | 1        | 726  | 20 | 0.0251938  |
| 0.083715   | 1        | 859  | 23 | 0.0133031  |
| 0.0782353  | 1        | 665  | 19 | 0.0178228  |
| 0.0698824  | 1        | 594  | 17 | 0.0298282  |
| 0.0721176  | 1        | 613  | 17 | 0.0238785  |
| 0.0914634  | 1        | 780  | 22 | 0.0259     |
| 0.0751287  | 1        | 686  | 18 | 0.0262884  |
| 0.11       | 1        | 935  | 25 | 0.0170283  |
| 0.0758427  | 1        | 648  | 13 | 0.0197737  |
| 0.0721176  | 1        | 613  | 13 | 0.0288748  |
| 0.0707059  | 1        | 601  | 15 | 0.0271535  |
| 0.106941   | 1        | 909  | 20 | 0.0189968  |
| 0.0722353  | 1        | 614  | 18 | 0.0282393  |
| 0.072      | 1        | 612  | 14 | 0.0264649  |



|           |          |      |    |            |
|-----------|----------|------|----|------------|
| 0.0723529 | 1        | 615  | 17 | 0.0252644  |
| 0.0692941 | 1        | 589  | 17 | 0.0160661  |
| 0.0835294 | 1        | 710  | 20 | 0.013665   |
| 0.0737259 | 1        | 651  | 18 | 0.0251496  |
| 0.062672  | 1        | 592  | 17 | 0.0262707  |
| 0.0967855 | 1        | 825  | 16 | 0.0181759  |
| 0.0525744 | 1        | 726  | 17 | 0.0253703  |
| 0.146344  | 1        | 1247 | 35 | 0.00759167 |
| 0.0545882 | 1        | 464  | 10 | 0.0237284  |
| 0.13214   | 1        | 1129 | 30 | 0.0108137  |
| 0.0757469 | 1        | 644  | 18 | 0.0195265  |
| 0.0423365 | 1        | 719  | 20 | 0.0222807  |
| 0.105971  | 1        | 930  | 19 | 0.0192617  |
| 0.087196  | 1        | 760  | 18 | 0.0259529  |
| 0.0556471 | 1        | 473  | 14 | 0.0275331  |
| 0.0221242 | 1        | 632  | 18 | 0.0259     |
| 0.0241546 | 1        | 690  | 19 | 0.0210978  |
| 0.0242816 | 1        | 954  | 27 | 0.0116435  |
| 0.0236962 | 1        | 931  | 26 | 0.017302   |
| 0.0390186 | 1        | 1533 | 42 | 0.0181229  |
| 0.0187584 | 1        | 737  | 21 | 0.0242492  |
| 0.0424124 | 1        | 865  | 24 | 0.019447   |
| 0.0370679 | 1        | 756  | 22 | 0.0220423  |
| 0.0412846 | 1        | 842  | 24 | 0.0232958  |
| 0.0354989 | 1        | 724  | 20 | 0.0261913  |
| 0.038686  | 1        | 789  | 22 | 0.026562   |
| 0.0975294 | 1        | 829  | 23 | 0.0260854  |
| 0.0791765 | 1        | 673  | 19 | 0.0255557  |
| 0.0789412 | 1        | 671  | 19 | 0.0232164  |
| 0.0434863 | 1        | 705  | 20 | 0.0258911  |
| 0.0444732 | 1        | 721  | 20 | 0.0242934  |
| 0.0723678 | 1        | 1530 | 43 | 0.0146802  |
| 0.106906  | 1        | 918  | 26 | 0.0151922  |
| 0.121854  | 1        | 1036 | 27 | 0.00969263 |
| 0.0454638 | 1        | 667  | 19 | 0.0207005  |
| 0.0451912 | 1        | 663  | 19 | 0.0262619  |
| 0.102824  | 1        | 874  | 25 | 0.0229604  |
| 0.0696471 | 1        | 592  | 17 | 0.0274536  |
| 0.0795294 | 1        | 676  | 15 | 0.011467   |
| 0.0708235 | 1        | 602  | 14 | 0.0251496  |
| 0.055143  | 1        | 594  | 17 | 0.0252556  |
| 0.0852941 | 1        | 725  | 21 | 0.0255557  |
| 0.0702208 | 1        | 598  | 17 | 0.0269063  |
| 0.0866957 | 1        | 737  | 15 | 0.0234459  |
| 0.0328501 | 0.381275 | 737  | 15 | 0.0234459  |
| 0.0868902 | 1        | 741  | 21 | 0.0159778  |
| 0.116471  | 1        | 990  | 28 | 0.00884518 |

|           |          |      |    |            |
|-----------|----------|------|----|------------|
| 0.0671765 | 1        | 571  | 16 | 0.0249201  |
| 0.0720772 | 1        | 635  | 18 | 0.0247347  |
| 0.0687059 | 0.940419 | 621  | 12 | 0.0236489  |
| 0.0972941 | 1        | 827  | 24 | 0.0231899  |
| 0.068788  | 1        | 588  | 17 | 0.0271888  |
| 0.0688406 | 1        | 589  | 11 | 0.0272947  |
| 0.0324805 | 1        | 617  | 10 | 0.0275595  |
| 0.0738824 | 1        | 628  | 18 | 0.0261648  |
| 0.0423536 | 1        | 596  | 17 | 0.0186349  |
| 0.0537641 | 1        | 867  | 22 | 0.0164192  |
| 0.0198943 | 0.369089 | 867  | 22 | 0.0164192  |
| 0.115277  | 1        | 987  | 26 | 0.0190145  |
| 0.114888  | 1        | 987  | 26 | 0.0190145  |
| 0.0742353 | 1        | 631  | 18 | 0.0261648  |
| 0.0681685 | 1        | 581  | 13 | 0.017708   |
| 0.0599473 | 1        | 546  | 12 | 0.0250084  |
| 0.070992  | 1        | 604  | 15 | 0.0246906  |
| 0.0663153 | 1        | 604  | 15 | 0.0246906  |
| 0.0873419 | 1        | 808  | 22 | 0.0183171  |
| 0.0669412 | 1        | 569  | 11 | 0.0241345  |
| 0.0707141 | 1        | 608  | 15 | 0.0275331  |
| 0.0483347 | 1        | 595  | 12 | 0.0180258  |
| 0.0569456 | 1        | 701  | 15 | 0.0271711  |
| 0.0706109 | 1        | 660  | 18 | 0.0259     |
| 0.0795294 | 1        | 676  | 19 | 0.0160043  |
| 0.0697647 | 1        | 593  | 11 | 0.0280362  |
| 0.0722255 | 1        | 615  | 17 | 0.0270917  |
| 0.0831765 | 1        | 707  | 20 | 0.0186967  |
| 0.0912941 | 1        | 776  | 22 | 0.0124645  |
| 0.0912941 | 1        | 776  | 22 | 0.0124645  |
| 0.0896552 | 1        | 767  | 22 | 0.0261471  |
| 0.132588  | 0.844828 | 1334 | 35 | 0.00454618 |
| 0.0554287 | 1        | 704  | 18 | 0.0192705  |
| 0.044943  | 1        | 587  | 16 | 0.0292809  |
| 0.103064  | 1        | 898  | 22 | 0.0141682  |
| 0.0431284 | 1        | 418  | 12 | 0.0257411  |
| 0.0586848 | 1        | 672  | 15 | 0.00752988 |
| 0.0554537 | 1        | 635  | 18 | 0.0188733  |
| 0.0411087 | 0.364293 | 969  | 23 | 0.0215745  |
| 0.0697155 | 1        | 593  | 17 | 0.0241609  |
| 0.0790588 | 1        | 672  | 19 | 0.0246641  |
| 0.0622526 | 1        | 1038 | 25 | 0.0173196  |
| 0.0736238 | 1        | 654  | 18 | 0.026306   |
| 0.0548218 | 1        | 689  | 17 | 0.0188379  |
| 0.0694118 | 1        | 590  | 15 | 0.0297576  |
| 0.126118  | 1        | 1072 | 28 | 0.0104253  |
| 0.0820129 | 1        | 735  | 20 | 0.0165957  |

|           |   |      |    |           |
|-----------|---|------|----|-----------|
| 0.0838852 | 1 | 722  | 21 | 0.017302  |
| 0.0852139 | 1 | 759  | 21 | 0.0213538 |
| 0.0963529 | 1 | 819  | 33 | 0.0286012 |
| 0.0709341 | 1 | 625  | 18 | 0.026156  |
| 0.0304515 | 1 | 522  | 10 | 0.028919  |
| 0.0848235 | 1 | 721  | 18 | 0.0209212 |
| 0.0901176 | 1 | 766  | 21 | 0.0244523 |
| 0.0749357 | 1 | 641  | 18 | 0.0263943 |
| 0.0718824 | 1 | 611  | 16 | 0.0241345 |
| 0.0518121 | 1 | 589  | 15 | 0.024567  |
| 0.127354  | 1 | 1089 | 27 | 0.0188644 |
| 0.128118  | 1 | 1089 | 27 | 0.0188644 |
| 0.0349435 | 1 | 761  | 21 | 0.0161809 |
| 0.071035  | 1 | 606  | 17 | 0.0292015 |
| 0.0824706 | 1 | 701  | 19 | 0.0251496 |
| 0.0877666 | 1 | 749  | 21 | 0.0166222 |
| 0.0752941 | 1 | 640  | 19 | 0.0277096 |
| 0.0563789 | 1 | 700  | 14 | 0.0246376 |
| 0.0882353 | 1 | 750  | 16 | 0.0219629 |
| 0.0721176 | 1 | 613  | 18 | 0.02989   |
| 0.0698824 | 1 | 594  | 15 | 0.018476  |
| 0.0703529 | 1 | 598  | 17 | 0.0284953 |
| 0.0718654 | 1 | 611  | 13 | 0.0207712 |
| 0.0849412 | 1 | 722  | 19 | 0.0175226 |
| 0.0697265 | 1 | 594  | 17 | 0.0265267 |
| 0.048     | 1 | 408  | 12 | 0.0299077 |
| 0.041282  | 1 | 626  | 17 | 0.0279921 |
| 0.0736471 | 1 | 626  | 17 | 0.0279921 |
| 0.0390956 | 1 | 600  | 17 | 0.0277184 |
| 0.0475927 | 1 | 602  | 17 | 0.0278332 |
| 0.107318  | 1 | 918  | 26 | 0.0187144 |
| 0.0684258 | 1 | 682  | 19 | 0.0267562 |
| 0.0822949 | 1 | 700  | 20 | 0.0256351 |
| 0.0727956 | 1 | 620  | 14 | 0.0170724 |
| 0.0990588 | 1 | 842  | 20 | 0.0191911 |
| 0.102588  | 1 | 872  | 19 | 0.0145566 |
| 0.0840257 | 1 | 718  | 20 | 0.0251496 |
| 0.0646361 | 1 | 991  | 24 | 0.0256087 |
| 0.105412  | 1 | 896  | 25 | 0.0174079 |
| 0.0743529 | 1 | 632  | 17 | 0.0251761 |
| 0.100118  | 1 | 851  | 23 | 0.025132  |
| 0.0845683 | 1 | 719  | 16 | 0.0245847 |
| 0.072531  | 1 | 625  | 15 | 0.0269063 |
| 0.127059  | 1 | 1080 | 30 | 0.0118995 |
| 0.043316  | 1 | 383  | 11 | 0.0241874 |
| 0.0989602 | 1 | 847  | 24 | 0.0150156 |
| 0.125292  | 1 | 1073 | 30 | 0.0220688 |

|           |          |      |    |            |
|-----------|----------|------|----|------------|
| 0.0705979 | 1        | 601  | 17 | 0.0248583  |
| 0.0702513 | 1        | 601  | 17 | 0.0264826  |
| 0.0906141 | 1        | 782  | 22 | 0.0286012  |
| 0.0905882 | 1        | 770  | 22 | 0.0265179  |
| 0.108706  | 1        | 924  | 24 | 0.0264738  |
| 0.0835294 | 0.889724 | 798  | 22 | 0.0227309  |
| 0.0749412 | 1        | 637  | 13 | 0.0251761  |
| 0.0831471 | 1        | 707  | 17 | 0.0190763  |
| 0.100471  | 1        | 854  | 24 | 0.0193764  |
| 0.0937647 | 1        | 797  | 22 | 0.0196236  |
| 0.102706  | 1        | 873  | 19 | 0.013718   |
| 0.05      | 1        | 425  | 12 | 0.029431   |
| 0.0708235 | 1        | 602  | 17 | 0.0286188  |
| 0.0811765 | 1        | 690  | 19 | 0.0254851  |
| 0.0707059 | 1        | 601  | 18 | 0.0298194  |
| 0.0689017 | 1        | 596  | 15 | 0.026818   |
| 0.0325882 | 0.424847 | 652  | 14 | 0.0298017  |
| 0.0952941 | 1        | 810  | 23 | 0.0244964  |
| 0.0696471 | 1        | 592  | 17 | 0.0282393  |
| 0.0472828 | 1        | 596  | 17 | 0.02989    |
| 0.0475967 | 1        | 406  | 10 | 0.0252203  |
| 0.0725882 | 1        | 617  | 17 | 0.0277096  |
| 0.0830588 | 1        | 706  | 19 | 0.0255557  |
| 0.186199  | 1        | 1843 | 84 | 0.0153952  |
| 0.049808  | 1        | 493  | 29 | 0.0297929  |
| 0.0619317 | 1        | 613  | 34 | 0.0262442  |
| 0.139523  | 1        | 1381 | 70 | 0.0125527  |
| 0.0241463 | 1        | 239  | 14 | 0.0193941  |
| 0.111969  | 1        | 1102 | 34 | 0.0182553  |
| 0.0654339 | 1        | 644  | 31 | 0.0264826  |
| 0.0735623 | 1        | 724  | 36 | 0.0206211  |
| 0.0977444 | 1        | 962  | 67 | 0.0132766  |
| 0.0715294 | 1        | 608  | 15 | 0.0297576  |
| 0.0459028 | 0.363383 | 1076 | 52 | 0.0185378  |
| 0.0699555 | 1        | 597  | 15 | 0.0170106  |
| 0.149683  | 1        | 1275 | 58 | 0.0146449  |
| 0.0698887 | 1        | 697  | 18 | 0.0198619  |
| 0.140981  | 1        | 1406 | 57 | 0.014486   |
| 0.0397448 | 1        | 461  | 13 | 0.0262884  |
| 0.0628235 | 1        | 534  | 24 | 0.0185025  |
| 0.113294  | 1        | 963  | 51 | 0.00494342 |
| 0.0717216 | 1        | 612  | 17 | 0.0279303  |
| 0.0714118 | 1        | 607  | 17 | 0.00963966 |
| 0.0166085 | 1        | 562  | 16 | 0.0178581  |
| 0.0166085 | 1        | 562  | 16 | 0.0166311  |
| 0.0166085 | 1        | 562  | 16 | 0.0184231  |
| 0.102588  | 1        | 872  | 21 | 0.0114581  |

|           |          |      |    |            |
|-----------|----------|------|----|------------|
| 0.0777647 | 1        | 661  | 19 | 0.0205681  |
| 0.0692726 | 1        | 599  | 16 | 0.0261383  |
| 0.0914118 | 1        | 777  | 22 | 0.0250437  |
| 0.0757647 | 1        | 644  | 18 | 0.0277096  |
| 0.0785882 | 1        | 668  | 18 | 0.0238078  |
| 0.097187  | 1        | 843  | 23 | 0.0149273  |
| 0.0825494 | 1        | 702  | 20 | 0.0241168  |
| 0.117647  | 1        | 1000 | 28 | 0.0186437  |
| 0.0972941 | 1        | 827  | 13 | 0.0253262  |
| 0.0994118 | 1        | 845  | 24 | 0.0138151  |
| 0.0625643 | 1        | 730  | 14 | 0.0264738  |
| 0.0848147 | 1        | 730  | 14 | 0.0264738  |
| 0.0776186 | 1        | 661  | 19 | 0.0202062  |
| 0.0718897 | 1        | 657  | 19 | 0.0281686  |
| 0.0886268 | 1        | 759  | 19 | 0.0257411  |
| 0.0755294 | 1        | 642  | 18 | 0.0294398  |
| 0.0620833 | 1        | 596  | 15 | 0.029943   |
| 0.0660417 | 1        | 634  | 16 | 0.0219276  |
| 0.0724671 | 1        | 638  | 18 | 0.0257146  |
| 0.11549   | 1        | 1011 | 29 | 0.0181317  |
| 0.0713282 | 1        | 609  | 17 | 0.0299341  |
| 0.074     | 1        | 629  | 13 | 0.0113963  |
| 0.128941  | 1        | 1096 | 30 | 0.00470507 |
| 0.0976782 | 1        | 955  | 21 | 0.00833319 |
| 0.113765  | 1        | 967  | 25 | 0.0171431  |
| 0.0944458 | 1        | 806  | 23 | 0.0144683  |
| 0.0948235 | 1        | 806  | 23 | 0.0144683  |
| 0.0895294 | 1        | 761  | 22 | 0.0137092  |
| 0.132686  | 1        | 1135 | 32 | 0.00762698 |
| 0.106824  | 1        | 908  | 22 | 0.0190498  |
| 0.0958872 | 1        | 830  | 23 | 0.0177257  |
| 0.0691514 | 1        | 590  | 17 | 0.0196236  |
| 0.0802433 | 1        | 686  | 19 | 0.014998   |
| 0.0773393 | 1        | 686  | 19 | 0.014998   |
| 0.14142   | 1        | 1209 | 34 | 0.0147861  |
| 0.0780158 | 0.572374 | 1209 | 34 | 0.0147861  |
| 0.127383  | 1        | 1089 | 38 | 0.0056761  |
| 0.102468  | 1        | 876  | 13 | 0.0258294  |
| 0.115529  | 1        | 982  | 35 | 0.00316026 |
| 0.0911765 | 1        | 775  | 17 | 0.0114846  |
| 0.118706  | 0.741912 | 1360 | 39 | 0.0188644  |
| 0.153629  | 1        | 2229 | 85 | 0.00792712 |
| 0.0602765 | 1        | 593  | 29 | 0.0268357  |
| 0.0818824 | 1        | 696  | 21 | 0.0132325  |

Fraction of negatively enriched windows in region

MAT-score on T(H3K9me3HETC vs. control)

|   |         |
|---|---------|
| 0 | 7.12048 |
| 0 | 8.62136 |
| 0 | 13.366  |
| 0 | 13.351  |
| 0 | 7.77014 |
| 0 | 9.72223 |
| 0 | 11.6343 |
| 0 | 8.36671 |
| 0 | 10.4333 |
| 0 | 10.1502 |
| 0 | 6.84645 |
| 0 | 7.00832 |
| 0 | 9.00326 |
| 0 | 7.01717 |
| 0 | 8.36799 |
| 0 | 8.47349 |
| 0 | 8.33386 |
| 0 | 8.2176  |
| 0 | 8.12298 |
| 0 | 8.29359 |
| 0 | 7.6701  |
| 0 | 7.22334 |
| 0 | 8.02847 |
| 0 | 7.43759 |
| 0 | 7.60594 |
| 0 | 8.17563 |
| 0 | 7.8782  |
| 0 | 10.1703 |
| 0 | 7.61259 |
| 0 | 8.74007 |
| 0 | 8.49633 |
| 0 | 8.31953 |
| 0 | 7.05813 |
| 0 | 10.0817 |
| 0 | 10.4528 |
| 0 | 9.45428 |
| 0 | 6.79426 |
| 0 | 7.02769 |
| 0 | 7.02769 |
| 0 | 7.12096 |
| 0 | 8.86972 |
| 0 | 9.09698 |
| 0 | 9.17881 |
| 0 | 6.77445 |

|   |         |
|---|---------|
| 0 | 6.80831 |
| 0 | 8.33224 |
| 0 | 6.79326 |
| 0 | 8.80232 |
| 0 | 6.82441 |
| 0 | 7.01167 |
| 0 | 8.61697 |
| 0 | 8.61697 |
| 0 | 6.9522  |
| 0 | 6.9522  |
| 0 | 8.02214 |
| 0 | 7.30437 |
| 0 | 7.18318 |
| 0 | 8.03154 |
| 0 | 8.03154 |
| 0 | 7.02159 |
| 0 | 7.75446 |
| 0 | 8.56811 |
| 0 | 8.87764 |
| 0 | 6.85311 |
| 0 | 7.2859  |
| 0 | 7.12411 |
| 0 | 7.33118 |
| 0 | 7.06511 |
| 0 | 7.08981 |
| 0 | 6.85473 |
| 0 | 8.40464 |
| 0 | 8.55241 |
| 0 | 7.30276 |
| 0 | 7.18914 |
| 0 | 7.08368 |
| 0 | 7.09934 |
| 0 | 6.90447 |
| 0 | 6.81241 |
| 0 | 12.0766 |
| 0 | 7.24942 |
| 0 | 7.47103 |
| 0 | 8.06602 |
| 0 | 7.19959 |
| 0 | 7.9834  |
| 0 | 7.54427 |
| 0 | 8.05169 |
| 0 | 9.45228 |
| 0 | 6.7221  |
| 0 | 6.7221  |
| 0 | 6.76359 |
| 0 | 8.18861 |

|   |         |
|---|---------|
| 0 | 6.75835 |
| 0 | 9.06015 |
| 0 | 11.3473 |
| 0 | 6.83516 |
| 0 | 7.006   |
| 0 | 8.04932 |
| 0 | 6.82572 |
| 0 | 7.32879 |
| 0 | 9.36262 |
| 0 | 9.36262 |
| 0 | 8.15174 |
| 0 | 11.2968 |
| 0 | 6.75481 |
| 0 | 9.06676 |
| 0 | 7.18177 |
| 0 | 7.12692 |
| 0 | 7.50025 |
| 0 | 6.7776  |
| 0 | 10.0967 |
| 0 | 8.15899 |
| 0 | 9.98588 |
| 0 | 8.22673 |
| 0 | 8.22673 |
| 0 | 7.43024 |
| 0 | 7.42262 |
| 0 | 6.95716 |
| 0 | 9.31451 |
| 0 | 9.31451 |
| 0 | 7.14939 |
| 0 | 10.4955 |
| 0 | 7.26416 |
| 0 | 7.26416 |
| 0 | 7.18152 |
| 0 | 7.18152 |
| 0 | 7.2395  |
| 0 | 7.3646  |
| 0 | 8.41078 |
| 0 | 7.2858  |
| 0 | 9.23715 |
| 0 | 8.10423 |
| 0 | 8.21056 |
| 0 | 8.21826 |
| 0 | 7.31194 |
| 0 | 6.81304 |
| 0 | 6.98097 |
| 0 | 7.19457 |
| 0 | 10.0657 |



|   |         |
|---|---------|
| 0 | 7.01076 |
| 0 | 8.87916 |
| 0 | 11.598  |
| 0 | 7.03629 |
| 0 | 7.97599 |
| 0 | 7.05616 |
| 0 | 8.49539 |
| 0 | 6.81409 |
| 0 | 7.66223 |
| 0 | 7.10172 |
| 0 | 8.61952 |
| 0 | 10.5307 |
| 0 | 7.04556 |
| 0 | 8.73555 |
| 0 | 7.08409 |
| 0 | 8.38861 |
| 0 | 9.21932 |
| 0 | 8.37022 |
| 0 | 6.81225 |
| 0 | 6.93574 |
| 0 | 6.8718  |
| 0 | 7.13183 |
| 0 | 6.82659 |
| 0 | 7.00238 |
| 0 | 7.21082 |
| 0 | 9.54151 |
| 0 | 9.54151 |
| 0 | 6.89759 |
| 0 | 9.82798 |
| 0 | 9.82798 |
| 0 | 6.92078 |
| 0 | 8.06842 |
| 0 | 7.062   |
| 0 | 9.03432 |
| 0 | 6.74953 |
| 0 | 8.58843 |
| 0 | 6.76421 |
| 0 | 9.6122  |
| 0 | 7.12891 |
| 0 | 7.66535 |
| 0 | 7.15744 |
| 0 | 8.03733 |
| 0 | 8.1751  |
| 0 | 6.86035 |
| 0 | 7.5406  |
| 0 | 8.40029 |
| 0 | 6.90167 |

|   |         |
|---|---------|
| 0 | 7.36417 |
| 0 | 7.36417 |
| 0 | 8.75299 |
| 0 | 6.76606 |
| 0 | 7.01782 |
| 0 | 6.85811 |
| 0 | 8.77004 |
| 0 | 7.12141 |
| 0 | 7.20125 |
| 0 | 9.70761 |
| 0 | 8.08476 |
| 0 | 6.91262 |
| 0 | 9.06617 |
| 0 | 7.44539 |
| 0 | 9.17657 |
| 0 | 7.41746 |
| 0 | 6.90894 |
| 0 | 7.01536 |
| 0 | 10.2796 |
| 0 | 8.57248 |
| 0 | 6.75982 |
| 0 | 9.12634 |
| 0 | 7.30844 |
| 0 | 8.1105  |
| 0 | 6.80125 |
| 0 | 10.3268 |
| 0 | 8.19515 |
| 0 | 7.06103 |
| 0 | 10.0516 |
| 0 | 7.2142  |
| 0 | 6.88176 |
| 0 | 6.76142 |
| 0 | 7.25737 |
| 0 | 7.59041 |
| 0 | 7.13733 |
| 0 | 7.17093 |
| 0 | 11.7048 |
| 0 | 6.99112 |
| 0 | 11.467  |
| 0 | 9.66605 |
| 0 | 8.27198 |
| 0 | 10.0775 |
| 0 | 7.14285 |
| 0 | 7.21672 |
| 0 | 7.64856 |
| 0 | 6.74255 |
| 0 | 9.62871 |

|   |         |
|---|---------|
| 0 | 6.73246 |
| 0 | 7.08442 |
| 0 | 7.41613 |
| 0 | 7.16943 |
| 0 | 8.36002 |
| 0 | 7.05911 |
| 0 | 6.91662 |
| 0 | 10.5444 |
| 0 | 7.32943 |
| 0 | 6.83852 |
| 0 | 7.05503 |
| 0 | 9.02753 |
| 0 | 6.75208 |
| 0 | 7.19699 |
| 0 | 9.46732 |
| 0 | 7.07824 |
| 0 | 9.09448 |
| 0 | 8.37767 |
| 0 | 7.43124 |
| 0 | 7.24612 |
| 0 | 9.24    |
| 0 | 7.0215  |
| 0 | 6.9947  |
| 0 | 7.46016 |
| 0 | 7.31185 |
| 0 | 7.07917 |
| 0 | 6.79103 |
| 0 | 7.05773 |
| 0 | 6.88041 |
| 0 | 8.18929 |
| 0 | 8.17251 |
| 0 | 7.61769 |
| 0 | 7.28948 |
| 0 | 7.3511  |
| 0 | 6.98073 |
| 0 | 7.69053 |
| 0 | 8.91224 |
| 0 | 6.80763 |
| 0 | 12.0319 |
| 0 | 6.95856 |
| 0 | 8.47953 |
| 0 | 6.97497 |
| 0 | 7.57013 |
| 0 | 6.88278 |
| 0 | 10.3432 |
| 0 | 8.06319 |
| 0 | 7.0999  |

|   |         |
|---|---------|
| 0 | 7.54815 |
| 0 | 7.11894 |
| 0 | 6.77573 |
| 0 | 7.01279 |
| 0 | 7.26802 |
| 0 | 6.8786  |
| 0 | 6.88248 |
| 0 | 6.96751 |
| 0 | 7.35945 |
| 0 | 8.11175 |
| 0 | 6.74571 |
| 0 | 8.49704 |
| 0 | 7.28774 |
| 0 | 6.83774 |
| 0 | 11.2703 |
| 0 | 8.36171 |
| 0 | 8.36171 |
| 0 | 9.07645 |
| 0 | 9.07645 |
| 0 | 8.1113  |
| 0 | 6.92389 |
| 0 | 8.06745 |
| 0 | 7.39997 |
| 0 | 10.0162 |
| 0 | 7.20055 |
| 0 | 7.30417 |
| 0 | 6.85288 |
| 0 | 7.47993 |
| 0 | 6.83163 |
| 0 | 6.83163 |
| 0 | 8.4337  |
| 0 | 6.76217 |
| 0 | 7.47192 |
| 0 | 7.47192 |
| 0 | 7.46673 |
| 0 | 7.46673 |
| 0 | 7.22569 |
| 0 | 7.5909  |
| 0 | 6.79662 |
| 0 | 11.1548 |
| 0 | 7.11116 |
| 0 | 7.10032 |
| 0 | 7.02348 |
| 0 | 7.07749 |
| 0 | 8.98204 |
| 0 | 8.98204 |
| 0 | 8.08996 |

|   |         |
|---|---------|
| 0 | 7.71817 |
| 0 | 9.70447 |
| 0 | 9.12567 |
| 0 | 8.18367 |
| 0 | 6.8884  |
| 0 | 7.25367 |
| 0 | 6.84972 |
| 0 | 11.0546 |
| 0 | 7.31521 |
| 0 | 8.39887 |
| 0 | 6.88758 |
| 0 | 7.49616 |
| 0 | 8.24043 |
| 0 | 7.77487 |
| 0 | 6.84331 |
| 0 | 7.05256 |
| 0 | 8.97171 |
| 0 | 7.09901 |
| 0 | 8.41915 |
| 0 | 8.41915 |
| 0 | 7.47163 |
| 0 | 7.13119 |
| 0 | 7.46746 |
| 0 | 7.02635 |
| 0 | 6.89672 |
| 0 | 6.97725 |
| 0 | 7.36638 |
| 0 | 7.77804 |
| 0 | 7.94972 |
| 0 | 6.93143 |
| 0 | 8.16554 |
| 0 | 7.76431 |
| 0 | 7.65712 |
| 0 | 10.3291 |
| 0 | 7.37331 |
| 0 | 6.85853 |
| 0 | 21.056  |
| 0 | 7.24083 |
| 0 | 7.06201 |
| 0 | 8.46613 |
| 0 | 6.75009 |
| 0 | 7.34684 |
| 0 | 7.34684 |
| 0 | 7.34578 |
| 0 | 10.3011 |
| 0 | 7.12267 |
| 0 | 7.31681 |

|   |         |
|---|---------|
| 0 | 7.16573 |
| 0 | 8.07276 |
| 0 | 7.32431 |
| 0 | 7.32431 |
| 0 | 7.18578 |
| 0 | 7.48137 |
| 0 | 8.28109 |
| 0 | 7.73304 |
| 0 | 6.86149 |
| 0 | 6.86149 |
| 0 | 8.62137 |
| 0 | 11.0822 |
| 0 | 7.55372 |
| 0 | 8.34086 |
| 0 | 7.5205  |
| 0 | 7.06612 |
| 0 | 6.94502 |
| 0 | 6.80832 |
| 0 | 12.1997 |
| 0 | 11.1299 |
| 0 | 6.77135 |
| 0 | 7.35204 |
| 0 | 6.72674 |
| 0 | 7.05632 |
| 0 | 9.26089 |
| 0 | 8.57062 |
| 0 | 7.37146 |
| 0 | 7.20738 |
| 0 | 6.73695 |
| 0 | 9.31263 |
| 0 | 7.23264 |
| 0 | 6.8498  |
| 0 | 7.18194 |
| 0 | 7.47945 |
| 0 | 7.1462  |
| 0 | 6.72678 |
| 0 | 6.89291 |
| 0 | 7.25038 |
| 0 | 11.5336 |
| 0 | 8.09578 |
| 0 | 7.51192 |
| 0 | 8.0894  |
| 0 | 7.02742 |
| 0 | 6.88122 |
| 0 | 8.08406 |
| 0 | 7.9427  |
| 0 | 12.0432 |

|   |         |
|---|---------|
| 0 | 7.87354 |
| 0 | 15.4822 |
| 0 | 7.88342 |
| 0 | 18.0539 |
| 0 | 7.28091 |
| 0 | 8.65221 |
| 0 | 8.48275 |
| 0 | 8.82426 |
| 0 | 7.61892 |
| 0 | 6.75347 |
| 0 | 6.7534  |
| 0 | 9.54441 |
| 0 | 7.27846 |
| 0 | 7.05583 |
| 0 | 6.74721 |
| 0 | 9.06656 |
| 0 | 7.38869 |
| 0 | 7.60436 |
| 0 | 7.55138 |
| 0 | 6.74363 |
| 0 | 8.27539 |
| 0 | 8.16046 |
| 0 | 7.20839 |
| 0 | 7.30262 |
| 0 | 7.81783 |
| 0 | 10.2958 |
| 0 | 9.0029  |
| 0 | 9.78086 |
| 0 | 7.708   |
| 0 | 8.25359 |
| 0 | 7.00761 |
| 0 | 7.44878 |
| 0 | 23.1239 |
| 0 | 6.72768 |
| 0 | 6.77918 |
| 0 | 8.64147 |
| 0 | 7.10763 |
| 0 | 8.65541 |
| 0 | 9.60825 |
| 0 | 7.944   |
| 0 | 6.79794 |
| 0 | 8.96466 |
| 0 | 7.06904 |
| 0 | 7.17729 |
| 0 | 6.87619 |
| 0 | 6.91007 |
| 0 | 8.02826 |

|   |         |
|---|---------|
| 0 | 7.21681 |
| 0 | 7.12429 |
| 0 | 7.12429 |
| 0 | 8.49844 |
| 0 | 8.03024 |
| 0 | 7.58485 |
| 0 | 8.00535 |
| 0 | 9.63854 |
| 0 | 6.73434 |
| 0 | 7.22728 |
| 0 | 7.02925 |
| 0 | 8.18129 |
| 0 | 7.2122  |
| 0 | 7.71484 |
| 0 | 8.12419 |
| 0 | 7.15627 |
| 0 | 7.71342 |
| 0 | 7.71342 |
| 0 | 7.10752 |
| 0 | 6.93947 |
| 0 | 7.17189 |
| 0 | 6.97002 |
| 0 | 6.82499 |
| 0 | 7.50987 |
| 0 | 6.92973 |
| 0 | 7.22393 |
| 0 | 8.38271 |
| 0 | 8.38271 |
| 0 | 11.5786 |
| 0 | 12.8715 |
| 0 | 6.90706 |
| 0 | 6.78283 |
| 0 | 9.35018 |
| 0 | 7.22513 |
| 0 | 9.56896 |
| 0 | 8.39143 |
| 0 | 6.73489 |
| 0 | 7.39166 |
| 0 | 7.12458 |
| 0 | 7.0737  |
| 0 | 8.61827 |
| 0 | 8.02089 |
| 0 | 6.81093 |
| 0 | 6.97995 |
| 0 | 8.16469 |
| 0 | 6.8716  |
| 0 | 7.05768 |



|   |         |
|---|---------|
| 0 | 7.21292 |
| 0 | 8.84058 |
| 0 | 9.45948 |
| 0 | 7.24088 |
| 0 | 7.07493 |
| 0 | 8.32844 |
| 0 | 7.19389 |
| 0 | 12.3978 |
| 0 | 7.41229 |
| 0 | 10.4939 |
| 0 | 8.06796 |
| 0 | 7.62139 |
| 0 | 8.1113  |
| 0 | 7.11301 |
| 0 | 6.94183 |
| 0 | 7.12166 |
| 0 | 7.79757 |
| 0 | 10.199  |
| 0 | 8.51913 |
| 0 | 8.34224 |
| 0 | 7.35678 |
| 0 | 8.08205 |
| 0 | 7.65016 |
| 0 | 7.47555 |
| 0 | 7.08301 |
| 0 | 7.04499 |
| 0 | 7.09746 |
| 0 | 7.17209 |
| 0 | 7.48854 |
| 0 | 7.12676 |
| 0 | 7.34898 |
| 0 | 9.1778  |
| 0 | 9.05011 |
| 0 | 11.026  |
| 0 | 7.86092 |
| 0 | 7.07774 |
| 0 | 7.52097 |
| 0 | 6.95174 |
| 0 | 10.2591 |
| 0 | 7.2343  |
| 0 | 7.2141  |
| 0 | 7.17328 |
| 0 | 7.00751 |
| 0 | 7.45979 |
| 0 | 7.45979 |
| 0 | 8.86611 |
| 0 | 11.4906 |

|   |         |
|---|---------|
| 0 | 7.26785 |
| 0 | 7.2914  |
| 0 | 7.43256 |
| 0 | 7.49207 |
| 0 | 6.97309 |
| 0 | 6.96487 |
| 0 | 6.93958 |
| 0 | 7.08515 |
| 0 | 8.23688 |
| 0 | 8.75555 |
| 0 | 8.75555 |
| 0 | 8.16362 |
| 0 | 8.16362 |
| 0 | 7.08484 |
| 0 | 8.42226 |
| 0 | 7.25696 |
| 0 | 7.29228 |
| 0 | 7.29228 |
| 0 | 8.29372 |
| 0 | 7.36587 |
| 0 | 6.94209 |
| 0 | 8.35846 |
| 0 | 6.97681 |
| 0 | 7.1228  |
| 0 | 8.85876 |
| 0 | 6.89085 |
| 0 | 6.98564 |
| 0 | 8.22093 |
| 0 | 9.88548 |
| 0 | 9.88548 |
| 0 | 7.09057 |
| 0 | 15.5951 |
| 0 | 8.10932 |
| 0 | 6.7824  |
| 0 | 9.32577 |
| 0 | 7.14941 |
| 0 | 12.4297 |
| 0 | 8.18509 |
| 0 | 7.72116 |
| 0 | 7.36349 |
| 0 | 7.29607 |
| 0 | 8.50803 |
| 0 | 7.07266 |
| 0 | 8.1961  |
| 0 | 6.73992 |
| 0 | 10.6652 |
| 0 | 8.70593 |

|   |         |
|---|---------|
| 0 | 8.52055 |
| 0 | 7.7505  |
| 0 | 6.83507 |
| 0 | 7.08632 |
| 0 | 6.80831 |
| 0 | 7.82858 |
| 0 | 7.33609 |
| 0 | 7.06379 |
| 0 | 7.3659  |
| 0 | 7.31952 |
| 0 | 8.1862  |
| 0 | 8.1862  |
| 0 | 8.81176 |
| 0 | 6.7893  |
| 0 | 7.24007 |
| 0 | 8.69247 |
| 0 | 6.92545 |
| 0 | 7.30305 |
| 0 | 7.66637 |
| 0 | 6.7309  |
| 0 | 8.26115 |
| 0 | 6.84675 |
| 0 | 7.85313 |
| 0 | 8.46586 |
| 0 | 7.04776 |
| 0 | 6.72637 |
| 0 | 6.89477 |
| 0 | 6.89477 |
| 0 | 6.92523 |
| 0 | 6.91249 |
| 0 | 8.20924 |
| 0 | 7.02637 |
| 0 | 7.16079 |
| 0 | 8.6002  |
| 0 | 8.12699 |
| 0 | 9.21198 |
| 0 | 7.2379  |
| 0 | 7.16504 |
| 0 | 8.48256 |
| 0 | 7.2299  |
| 0 | 7.24607 |
| 0 | 7.31064 |
| 0 | 7.00855 |
| 0 | 10.0891 |
| 0 | 7.36075 |
| 0 | 9.10543 |
| 0 | 7.64745 |

|   |         |
|---|---------|
| 0 | 7.2741  |
| 0 | 7.05285 |
| 0 | 6.83531 |
| 0 | 7.04962 |
| 0 | 7.0538  |
| 0 | 7.5667  |
| 0 | 7.22786 |
| 0 | 8.15145 |
| 0 | 8.09212 |
| 0 | 8.05141 |
| 0 | 9.45047 |
| 0 | 6.77346 |
| 0 | 6.83317 |
| 0 | 7.17933 |
| 0 | 6.73579 |
| 0 | 7.02264 |
| 0 | 6.73756 |
| 0 | 7.33062 |
| 0 | 6.87127 |
| 0 | 6.73058 |
| 0 | 7.2216  |
| 0 | 6.92618 |
| 0 | 7.17217 |
| 0 | 9.00858 |
| 0 | 6.73863 |
| 0 | 7.07903 |
| 0 | 9.85096 |
| 0 | 8.08793 |
| 0 | 8.3077  |
| 0 | 7.05227 |
| 0 | 7.87423 |
| 0 | 9.59274 |
| 0 | 6.74005 |
| 0 | 8.25169 |
| 0 | 8.62164 |
| 0 | 9.18335 |
| 0 | 8.0047  |
| 0 | 9.23158 |
| 0 | 7.07401 |
| 0 | 8.25583 |
| 0 | 15.1484 |
| 0 | 6.89937 |
| 0 | 11.0546 |
| 0 | 8.38377 |
| 0 | 8.6885  |
| 0 | 8.26739 |
| 0 | 10.2623 |

|   |         |
|---|---------|
| 0 | 7.88377 |
| 0 | 7.09173 |
| 0 | 7.25146 |
| 0 | 6.92634 |
| 0 | 7.39774 |
| 0 | 9.13112 |
| 0 | 7.36684 |
| 0 | 8.2354  |
| 0 | 7.19915 |
| 0 | 9.4255  |
| 0 | 7.05565 |
| 0 | 7.05565 |
| 0 | 7.93894 |
| 0 | 6.87813 |
| 0 | 7.14945 |
| 0 | 6.77202 |
| 0 | 6.72472 |
| 0 | 7.67258 |
| 0 | 7.15327 |
| 0 | 8.33742 |
| 0 | 6.72516 |
| 0 | 10.2806 |
| 0 | 15.4431 |
| 0 | 11.7505 |
| 0 | 8.56977 |
| 0 | 9.24269 |
| 0 | 9.24269 |
| 0 | 9.45448 |
| 0 | 12.3709 |
| 0 | 8.15448 |
| 0 | 8.41691 |
| 0 | 8.05221 |
| 0 | 9.1152  |
| 0 | 9.1152  |
| 0 | 9.1558  |
| 0 | 9.1558  |
| 0 | 14.2648 |
| 0 | 7.13397 |
| 0 | 18.7174 |
| 0 | 10.2363 |
| 0 | 8.18617 |
| 0 | 12.1004 |
| 0 | 7.02097 |
| 0 | 9.60807 |

## Gene List G4+/- H3K9me3 High Fat Diet

| chromosome | feature start | feature end | feature      | chromosome | region start | region end |
|------------|---------------|-------------|--------------|------------|--------------|------------|
| 1          | 193601396     | 193609904   | NM_009579    | chr1       | 193607576    | 193608603  |
| 1          | 192677315     | 192685839   | NM_144879    | chr1       | 192682254    | 192683172  |
| 1          | 187027667     | 187036189   | NM_198653    | chr1       | 187027737    | 187028388  |
| 1          | 186697768     | 186706267   | NM_145515    | chr1       | 186701574    | 186702489  |
| 2          | 181761309     | 181773112   | NM_153594    | chr2       | 181768712    | 181769358  |
| 1          | 181586585     | 181595084   | BC023122     | chr1       | 181590039    | 181591013  |
| 1          | 181377204     | 181385703   | NM_146105    | chr1       | 181383100    | 181383721  |
| 1          | 181380440     | 181388942   | NM_008249    | chr1       | 181383100    | 181383721  |
| 2          | 181232971     | 181249907   | NM_009133    | chr2       | 181245351    | 181246387  |
| 2          | 181243157     | 181251730   | NM_001001882 | chr2       | 181245351    | 181246387  |
| 2          | 180847816     | 180856344   | NM_173761    | chr2       | 180853837    | 180854545  |
| 2          | 180587940     | 180596439   | BC039702     | chr2       | 180593357    | 180594146  |
| 2          | 180569391     | 180578099   | NM_178254    | chr2       | 180573186    | 180573964  |
| 2          | 178334567     | 178349615   | NM_177191    | chr2       | 178345110    | 178345953  |
| 2          | 178334567     | 178349615   | NM_177191    | chr2       | 178337215    | 178337861  |
| 1          | 176261105     | 176269604   | NM_146761    | chr1       | 176263758    | 176264359  |
| 1          | 176221746     | 176230245   | NM_146714    | chr1       | 176223854    | 176224454  |
| 1          | 175982156     | 175997949   | NM_146305    | chr1       | 175995756    | 175996857  |
| 1          | 175967421     | 175975920   | NM_146721    | chr1       | 175969359    | 175970269  |
| 1          | 175952223     | 175960722   | NM_001005520 | chr1       | 175959876    | 175960597  |
| 1          | 175952223     | 175960722   | NM_001005520 | chr1       | 175955566    | 175957020  |
| 1          | 175930135     | 175938634   | NM_001011844 | chr1       | 175935917    | 175936747  |
| 1          | 175816890     | 175825389   | NM_011940    | chr1       | 175819257    | 175819789  |
| 1          | 175100822     | 175109321   | NM_146651    | chr1       | 175102843    | 175103483  |
| 1          | 175061368     | 175069889   | NM_010184    | chr1       | 175062190    | 175063316  |
| 1          | 174965412     | 174973911   | NM_146764    | chr1       | 174967189    | 174967879  |
| 1          | 174729127     | 174737718   | NM_011318    | chr1       | 174732978    | 174733590  |
| 1          | 174207221     | 174215730   | NM_026234    | chr1       | 174208708    | 174209333  |
| 2          | 174079356     | 174087941   | NM_022325    | chr2       | 174084401    | 174085109  |
| 1          | 173194974     | 173203473   | NM_001033039 | chr1       | 173201843    | 173202668  |
| 1          | 173201030     | 173209591   | NM_027893    | chr1       | 173201843    | 173202668  |
| 1          | 172952336     | 172962333   | BC061017     | chr1       | 172954779    | 172955687  |
| 2          | 171933697     | 171942203   | NM_008561    | chr2       | 171936855    | 171937703  |
| 2          | 169970168     | 169978667   | BC098225     | chr2       | 169977840    | 169978707  |
| 1          | 169227973     | 169236472   | NM_025569    | chr1       | 169232773    | 169233479  |
| 1          | 168516011     | 168524520   | NM_172844    | chr1       | 168517411    | 168518028  |
| 1          | 168243958     | 168252481   | NM_175170    | chr1       | 168246325    | 168246943  |
| 1          | 167071073     | 167079618   | NM_145513    | chr1       | 167079525    | 167079943  |
| 1          | 165945939     | 165954438   | NM_011347    | chr1       | 165953661    | 165954341  |
| X          | 165317556     | 165326055   | BC059027     | chrX       | 165325105    | 165325978  |
| X          | 165317556     | 165326055   | BC059027     | chrX       | 165324054    | 165325092  |
| X          | 165317556     | 165326055   | BC059027     | chrX       | 165322446    | 165323681  |
| X          | 165317556     | 165326055   | BC059027     | chrX       | 165319493    | 165320167  |
| X          | 165317556     | 165326055   | BC059027     | chrX       | 165318373    | 165319440  |

|   |   |           |           |              |      |           |           |
|---|---|-----------|-----------|--------------|------|-----------|-----------|
|   | 2 | 165189135 | 165197684 | NM_130451    | chr2 | 165197172 | 165197608 |
|   | 2 | 165182020 | 165190519 | NM_001007581 | chr2 | 165183847 | 165184645 |
|   | 1 | 165146989 | 165156325 | NM_175686    | chr1 | 165154323 | 165155108 |
|   | 1 | 164469841 | 164478379 | NM_010865    | chr1 | 164469230 | 164469922 |
|   | 1 | 164401398 | 164413475 | NM_016796    | chr1 | 164412348 | 164413126 |
|   | 1 | 164401398 | 164413475 | NM_016796    | chr1 | 164407172 | 164407919 |
| X |   | 161821260 | 161833713 | NM_019773    | chrX | 161827205 | 161828016 |
|   | 2 | 160601270 | 160609769 | NM_182840    | chr2 | 160606761 | 160607693 |
|   | 1 | 160190438 | 160199003 | NM_207583    | chr1 | 160194197 | 160195032 |
|   | 1 | 160193033 | 160201888 | NM_007495    | chr1 | 160194197 | 160195032 |
|   | 2 | 160055710 | 160064443 | NM_010658    | chr2 | 160062914 | 160063662 |
|   | 1 | 158508498 | 158517002 | NM_023141    | chr1 | 158514455 | 158515071 |
|   | 2 | 158350839 | 158361078 | NM_153089    | chr2 | 158359244 | 158359881 |
|   | 1 | 158300959 | 158317005 | NM_009230    | chr1 | 158306530 | 158307270 |
|   | 1 | 157732606 | 157741402 | BC089561     | chr1 | 157735520 | 157736137 |
|   | 3 | 157463680 | 157478860 | NM_017381    | chr3 | 157465193 | 157465936 |
|   | 2 | 156893443 | 156901960 | NM_011249    | chr2 | 156900275 | 156901081 |
|   | 2 | 156695978 | 156704516 | NM_025853    | chr2 | 156703177 | 156703986 |
| X |   | 156455298 | 156470872 | AF285577     | chrX | 156467452 | 156468062 |
| X |   | 156455298 | 156470872 | AF285577     | chrX | 156466096 | 156466899 |
| X |   | 156455298 | 156470872 | AF285577     | chrX | 156459474 | 156460381 |
| X |   | 156106118 | 156114754 | NM_011302    | chrX | 156111303 | 156111921 |
|   | 2 | 156019301 | 156027800 | BC075727     | chr2 | 156025398 | 156026125 |
| X |   | 155768452 | 155776951 | BC116644     | chrX | 155774549 | 155775261 |
|   | 1 | 155509148 | 155518322 | NM_011882    | chr1 | 155509965 | 155510581 |
|   | 2 | 155460785 | 155469339 | NM_010808    | chr2 | 155468305 | 155469048 |
|   | 4 | 155010378 | 155018877 | BC064021     | chr4 | 155017579 | 155018520 |
|   | 1 | 154945737 | 154954665 | NM_008485    | chr1 | 154948907 | 154949657 |
|   | 2 | 154763368 | 154771874 | NM_016661    | chr2 | 154764037 | 154764753 |
|   | 4 | 154650289 | 154667372 | NM_207678    | chr4 | 154652848 | 154653472 |
|   | 3 | 154263263 | 154271853 | NM_010713    | chr3 | 154270802 | 154271693 |
|   | 3 | 154186767 | 154195266 | BC068154     | chr3 | 154192744 | 154193535 |
|   | 2 | 153992685 | 154001184 | NM_001025574 | chr2 | 154000040 | 154000903 |
|   | 3 | 153775628 | 153784132 | NM_025758    | chr3 | 153778555 | 153779054 |
|   | 2 | 153001656 | 153010155 | D26077       | chr2 | 153008293 | 153009122 |
|   | 4 | 152849603 | 152858102 | NM_201226    | chr4 | 152853910 | 152854527 |
|   | 2 | 152751396 | 152759895 | NM_145536    | chr2 | 152751794 | 152752323 |
|   | 2 | 152717293 | 152725792 | NM_001011732 | chr2 | 152724765 | 152725751 |
|   | 3 | 152434237 | 152442736 | AB060081     | chr3 | 152439789 | 152440969 |
|   | 1 | 152225317 | 152234383 | AB034730     | chr1 | 152229199 | 152229812 |
|   | 1 | 152149056 | 152157570 | NM_133780    | chr1 | 152157003 | 152157665 |
|   | 1 | 152150072 | 152161273 | NM_145511    | chr1 | 152157003 | 152157665 |
|   | 1 | 152149056 | 152157570 | NM_133780    | chr1 | 152150210 | 152150862 |
|   | 1 | 152150072 | 152161273 | NM_145511    | chr1 | 152150210 | 152150862 |
|   | 1 | 152075635 | 152084148 | NM_024458    | chr1 | 152082834 | 152083547 |
| X |   | 150486066 | 150497970 | BC100353     | chrX | 150496885 | 150497599 |
| X |   | 150428007 | 150437540 | NM_020015    | chrX | 150432494 | 150433218 |

|   |           |           |           |              |           |           |           |
|---|-----------|-----------|-----------|--------------|-----------|-----------|-----------|
| X | 150393702 | 150408269 | NM_020018 | chrX         | 150404975 | 150405766 |           |
| X | 150370717 | 150380008 | NM_020016 | chrX         | 150375103 | 150376278 |           |
| X | 150287786 | 150296285 | NM_020017 | chrX         | 150291165 | 150291906 |           |
| X | 150287786 | 150296285 | NM_020017 | chrX         | 150290411 | 150291046 |           |
|   | 4         | 149897544 | 149907753 | NM_009498    | chr4      | 149902586 | 149903433 |
|   | 4         | 149885773 | 149894389 | NM_011067    | chr4      | 149892186 | 149892891 |
|   | 5         | 149674170 | 149682764 | NM_027519    | chr5      | 149678617 | 149679373 |
|   | 6         | 148850797 | 148864308 | BC025636     | chr6      | 148862711 | 148863185 |
|   | 5         | 148859878 | 148869138 | NM_011908    | chr5      | 148862489 | 148863098 |
| X |           | 148694329 | 148702828 | BC070442     | chrX      | 148694524 | 148695202 |
|   | 2         | 148460364 | 148468938 | NM_030059    | chr2      | 148467185 | 148468033 |
|   | 2         | 148467450 | 148483324 | NM_030135    | chr2      | 148467185 | 148468033 |
|   | 4         | 148424228 | 148432937 | NM_023051    | chr4      | 148425211 | 148425844 |
|   | 6         | 147427041 | 147435635 | NM_025911    | chr6      | 147431780 | 147432372 |
|   | 4         | 147286041 | 147294551 | NM_027873    | chr4      | 147292084 | 147292725 |
|   | 4         | 147286407 | 147294924 | NM_020009    | chr4      | 147292084 | 147292725 |
|   | 5         | 147137494 | 147147029 | NM_019647    | chr5      | 147139457 | 147140070 |
|   | 2         | 146774287 | 146782786 | NM_023504    | chr2      | 146779876 | 146780811 |
|   | 2         | 146698460 | 146707000 | NM_011917    | chr2      | 146699071 | 146699516 |
|   | 2         | 146541328 | 146549829 | NM_001033298 | chr2      | 146549222 | 146549843 |
|   | 4         | 146483799 | 146492298 | BC058858     | chr4      | 146490258 | 146491112 |
|   | 4         | 146483799 | 146492298 | BC058858     | chr4      | 146488330 | 146488811 |
|   | 4         | 146483799 | 146492298 | BC058858     | chr4      | 146486776 | 146487545 |
|   | 4         | 146456730 | 146465229 | NM_145078    | chr4      | 146460099 | 146461898 |
|   | 4         | 146456730 | 146465229 | NM_145078    | chr4      | 146458436 | 146459273 |
|   | 3         | 146430002 | 146443139 | NM_027617    | chr3      | 146434531 | 146435693 |
|   | 3         | 146431222 | 146439775 | NM_010318    | chr3      | 146434531 | 146435693 |
|   | 4         | 146391107 | 146399606 | NM_001014397 | chr4      | 146397187 | 146398263 |
|   | 4         | 146391107 | 146399606 | NM_001014397 | chr4      | 146395602 | 146397028 |
|   | 3         | 146381879 | 146390378 | NM_028836    | chr3      | 146382197 | 146382855 |
|   | 4         | 145969893 | 145978392 | BC024323     | chr4      | 145977173 | 145978020 |
|   | 4         | 145969893 | 145978392 | BC024323     | chr4      | 145974963 | 145975696 |
|   | 4         | 145969893 | 145978392 | BC024323     | chr4      | 145971841 | 145972698 |
|   | 4         | 145890306 | 145898805 | NM_009051    | chr4      | 145896558 | 145897953 |
|   | 4         | 145890306 | 145898805 | NM_009051    | chr4      | 145895401 | 145896502 |
|   | 4         | 145809847 | 145818346 | AF051348     | chr4      | 145817406 | 145817928 |
|   | 4         | 145809847 | 145818346 | AF051348     | chr4      | 145815923 | 145817111 |
|   | 4         | 145809847 | 145818346 | AF051348     | chr4      | 145814143 | 145815690 |
|   | 4         | 145809847 | 145818346 | AF051348     | chr4      | 145811963 | 145812757 |
|   | 3         | 145810391 | 145818890 | BC086777     | chr3      | 145811323 | 145812024 |
|   | 3         | 145690113 | 145698626 | NM_026993    | chr3      | 145691675 | 145692282 |
|   | 2         | 145588710 | 145597227 | NM_026425    | chr2      | 145589319 | 145589935 |
|   | 4         | 145528370 | 145536936 | NM_001037926 | chr4      | 145535326 | 145536291 |
|   | 4         | 145528370 | 145536936 | NM_001037926 | chr4      | 145532795 | 145534255 |
|   | 4         | 145528370 | 145536936 | NM_001037926 | chr4      | 145530544 | 145531422 |
|   | 2         | 145471578 | 145480085 | NM_028724    | chr2      | 145479243 | 145480031 |
|   | 5         | 145290517 | 145299016 | NM_027069    | chr5      | 145295863 | 145296545 |



|   |   |           |           |              |      |           |           |
|---|---|-----------|-----------|--------------|------|-----------|-----------|
|   | 5 | 145106524 | 145119072 | BC008264     | chr5 | 145112641 | 145113317 |
|   | 4 | 144931384 | 144939883 | BC096593     | chr4 | 144937645 | 144938742 |
|   | 4 | 144931384 | 144939883 | BC096593     | chr4 | 144936338 | 144937345 |
|   | 4 | 144931384 | 144939883 | BC096593     | chr4 | 144933497 | 144934251 |
|   | 4 | 144771482 | 144784069 | NM_001013808 | chr4 | 144778428 | 144779046 |
|   | 4 | 144771482 | 144784069 | NM_001013808 | chr4 | 144775890 | 144777388 |
|   | 5 | 144146058 | 144154594 | NM_025732    | chr5 | 144146607 | 144147254 |
|   | 4 | 143544654 | 143553153 | BC052827     | chr4 | 143550572 | 143551311 |
|   | 4 | 143451416 | 143459915 | NM_198661    | chr4 | 143451686 | 143452482 |
|   | 5 | 143439375 | 143451915 | NM_021326    | chr5 | 143439665 | 143440308 |
|   | 5 | 143440157 | 143449123 | NM_177880    | chr5 | 143439665 | 143440308 |
|   | 4 | 143426824 | 143435323 | NM_201258    | chr4 | 143432874 | 143433540 |
|   | 7 | 143406930 | 143415446 | NM_013742    | chr7 | 143414364 | 143415071 |
|   | 4 | 143050046 | 143058551 | NM_001007077 | chr4 | 143053937 | 143054844 |
| X |   | 142202881 | 142211380 | NM_008312    | chrX | 142210080 | 142210709 |
|   | 7 | 141594511 | 141603010 | NM_010844    | chr7 | 141597994 | 141598880 |
|   | 1 | 141190953 | 141199511 | NM_133239    | chr1 | 141192664 | 141193271 |
|   | 7 | 140915595 | 140933597 | NM_019762    | chr7 | 140931619 | 140932225 |
|   | 7 | 140859517 | 140874228 | NM_025378    | chr7 | 140866650 | 140867322 |
|   | 1 | 140774197 | 140786631 | NM_181347    | chr1 | 140774874 | 140775673 |
|   | 7 | 140609059 | 140617651 | NM_021282    | chr7 | 140615619 | 140616217 |
|   | 6 | 140376577 | 140389004 | NM_144920    | chr6 | 140377303 | 140377930 |
|   | 2 | 140350695 | 140359194 | AY495670     | chr2 | 140356656 | 140357308 |
|   | 2 | 140350695 | 140359194 | AY495670     | chr2 | 140351575 | 140352623 |
|   | 7 | 140051589 | 140060088 | NM_001011814 | chr7 | 140059196 | 140059798 |
|   | 7 | 139961219 | 139969718 | BC033913     | chr7 | 139963356 | 139963971 |
|   | 4 | 139516361 | 139524860 | NM_198610    | chr4 | 139523804 | 139524533 |
|   | 7 | 139234429 | 139242929 | NM_183144    | chr7 | 139235157 | 139235989 |
| X |   | 139176794 | 139185679 | NM_010025    | chrX | 139178078 | 139179067 |
|   | 3 | 139137280 | 139145779 | NM_198659    | chr3 | 139141818 | 139142433 |
| X |   | 138906113 | 138914612 | U39738       | chrX | 138912720 | 138913374 |
| X |   | 138803637 | 138812136 | BC053403     | chrX | 138808385 | 138809190 |
|   | 6 | 138543665 | 138552164 | NM_207222    | chr6 | 138545112 | 138546007 |
|   | 5 | 138500043 | 138515732 | NM_001033416 | chr5 | 138513034 | 138513827 |
|   | 5 | 138500043 | 138515732 | NM_001033416 | chr5 | 138508503 | 138509212 |
|   | 5 | 138504339 | 138512838 | NM_016964    | chr5 | 138508503 | 138509212 |
|   | 7 | 138231019 | 138242073 | NM_183289    | chr7 | 138234702 | 138235617 |
|   | 1 | 138225682 | 138234264 | NM_026500    | chr1 | 138225686 | 138226609 |
|   | 3 | 138209032 | 138217551 | NM_007409    | chr3 | 138215377 | 138215992 |
|   | 3 | 138209032 | 138217551 | NM_007409    | chr3 | 138209054 | 138209817 |
| X |   | 138097652 | 138106151 | BC031534     | chrX | 138103042 | 138103749 |
|   | 1 | 137646765 | 137659767 | NM_011619    | chr1 | 137657764 | 137658884 |
|   | 1 | 137072350 | 137080849 | NM_007921    | chr1 | 137078195 | 137078712 |
| X |   | 136969086 | 136977585 | NM_010572    | chrX | 136972713 | 136973810 |
|   | 6 | 136895475 | 136911913 | NM_007486    | chr6 | 136900047 | 136900778 |
|   | 6 | 136789805 | 136805646 | NM_021714    | chr6 | 136802530 | 136803658 |
|   | 6 | 136477047 | 136485563 | NM_019426    | chr6 | 136482572 | 136483220 |

|   |   |           |           |              |      |           |           |
|---|---|-----------|-----------|--------------|------|-----------|-----------|
|   | 3 | 136260881 | 136269442 | NM_001033350 | chr3 | 136268755 | 136269415 |
|   | 2 | 136076880 | 136085401 | NM_172858    | chr2 | 136077828 | 136078629 |
|   | 5 | 136026300 | 136034799 | NM_172541    | chr5 | 136031459 | 136032326 |
| X |   | 136018392 | 136026891 | AF196480     | chrX | 136023707 | 136024386 |
| X |   | 136005320 | 136013819 | NM_011845    | chrX | 136010027 | 136010659 |
|   | 5 | 135911281 | 135919848 | NM_146002    | chr5 | 135919642 | 135920318 |
|   | 5 | 135911281 | 135919848 | NM_146002    | chr5 | 135917781 | 135918346 |
|   | 1 | 135567193 | 135575692 | NM_213616    | chr1 | 135571127 | 135571760 |
|   | 1 | 135435276 | 135443809 | NM_009227    | chr1 | 135439730 | 135440335 |
| X |   | 134950984 | 134959506 | NM_023270    | chrX | 134951065 | 134951755 |
| X |   | 134820807 | 134829330 | NM_175326    | chrX | 134826107 | 134827135 |
|   | 1 | 134758617 | 134767116 | AY362823     | chr1 | 134761378 | 134761969 |
|   | 6 | 134529976 | 134538606 | NM_008514    | chr6 | 134531711 | 134532348 |
| X |   | 134427566 | 134437581 | NM_177920    | chrX | 134427724 | 134428835 |
|   | 6 | 134356022 | 134364521 | NM_025778    | chr6 | 134358946 | 134359344 |
|   | 2 | 134333063 | 134341562 | NM_029148    | chr2 | 134338422 | 134338795 |
|   | 1 | 134137684 | 134146207 | NM_028778    | chr1 | 134145818 | 134146168 |
|   | 6 | 133816847 | 133825363 | NM_010594    | chr6 | 133817761 | 133818375 |
|   | 3 | 133406624 | 133415123 | BC040785     | chr3 | 133406711 | 133407452 |
|   | 4 | 133026346 | 133034845 | AF268912     | chr4 | 133028760 | 133029424 |
|   | 1 | 133025122 | 133033621 | AY261333     | chr1 | 133025837 | 133026491 |
|   | 6 | 132869344 | 132877843 | NM_207027    | chr6 | 132869834 | 132870455 |
|   | 1 | 132841393 | 132849915 | NM_010548    | chr1 | 132849270 | 132849864 |
|   | 6 | 132664201 | 132672700 | NM_207024    | chr6 | 132671139 | 132671753 |
|   | 2 | 132607562 | 132616061 | BC029093     | chr2 | 132611867 | 132612356 |
|   | 6 | 132524669 | 132538034 | NM_011174    | chr6 | 132533296 | 132534361 |
|   | 2 | 132466719 | 132475617 | NM_007694    | chr2 | 132471573 | 132472229 |
|   | 7 | 132442986 | 132451509 | NM_029609    | chr7 | 132444210 | 132444989 |
|   | 6 | 132404930 | 132413429 | NM_001004160 | chr6 | 132408288 | 132408914 |
| X |   | 132389993 | 132398492 | NM_146261    | chrX | 132392643 | 132393657 |
|   | 1 | 132287731 | 132296286 | NM_010016    | chr1 | 132293926 | 132294660 |
|   | 6 | 131642080 | 131661756 | NM_207019    | chr6 | 131654374 | 131655466 |
|   | 6 | 131642080 | 131661756 | NM_207019    | chr6 | 131650599 | 131651209 |
|   | 4 | 131521429 | 131529928 | NM_020273    | chr4 | 131528263 | 131528797 |
| X |   | 131479409 | 131488004 | NM_212457    | chrX | 131483398 | 131483999 |
| X |   | 131334188 | 131342694 | NM_029823    | chrX | 131340694 | 131341496 |
|   | 3 | 131289883 | 131298382 | NM_027816    | chr3 | 131297513 | 131298147 |
|   | 3 | 131289883 | 131298382 | NM_027816    | chr3 | 131293068 | 131293712 |
|   | 6 | 131208574 | 131225742 | NM_008462    | chr6 | 131222080 | 131222697 |
|   | 1 | 131095009 | 131103519 | NM_172485    | chr1 | 131098004 | 131098662 |
|   | 1 | 131095009 | 131103519 | NM_172485    | chr1 | 131095106 | 131095965 |
|   | 2 | 130752487 | 130761255 | NM_033615    | chr2 | 130753453 | 130754324 |
| X |   | 130713648 | 130722160 | NM_183320    | chrX | 130721604 | 130722123 |
| X |   | 130521479 | 130529978 | BC115763     | chrX | 130521110 | 130521713 |
|   | 8 | 130320799 | 130329298 | BC025186     | chr8 | 130324086 | 130324736 |
|   | 8 | 130320799 | 130329298 | BC025186     | chr8 | 130323213 | 130323814 |
|   | 7 | 130308173 | 130317109 | NM_013799    | chr7 | 130316400 | 130317108 |

|   |    |           |           |              |       |           |           |
|---|----|-----------|-----------|--------------|-------|-----------|-----------|
|   | 3  | 130164033 | 130172871 | NM_198711    | chr3  | 130167697 | 130168619 |
|   | 3  | 130164033 | 130172871 | NM_198711    | chr3  | 130164107 | 130164743 |
|   | 4  | 130058613 | 130067221 | NM_011520    | chr4  | 130062242 | 130062697 |
|   | 6  | 129990125 | 129998653 | NM_053154    | chr6  | 129997404 | 129998029 |
|   | 2  | 129981380 | 129989879 | NM_152993    | chr2  | 129982481 | 129983073 |
|   | 2  | 129808726 | 129817238 | NM_177726    | chr2  | 129814325 | 129815478 |
| X |    | 129635575 | 129644172 | NM_026239    | chrX  | 129643103 | 129643708 |
|   | 10 | 129563872 | 129572371 | NM_146677    | chr10 | 129569974 | 129570570 |
|   | 10 | 129527505 | 129536004 | NM_146674    | chr10 | 129530389 | 129531756 |
|   | 3  | 129518408 | 129527062 | NM_130450    | chr3  | 129518481 | 129519439 |
|   | 6  | 129492858 | 129501448 | NM_020590    | chr6  | 129493632 | 129494360 |
|   | 2  | 129486002 | 129494501 | NM_183262    | chr2  | 129491838 | 129492951 |
|   | 6  | 129470348 | 129478847 | NM_138648    | chr6  | 129470338 | 129471447 |
| X |    | 129455559 | 129464058 | NM_172203    | chrX  | 129463352 | 129463996 |
|   | 2  | 129388775 | 129397274 | NM_018863    | chr2  | 129393744 | 129394194 |
|   | 2  | 129388775 | 129397274 | NM_018863    | chr2  | 129391524 | 129392136 |
|   | 2  | 129388775 | 129397274 | NM_018863    | chr2  | 129389132 | 129389802 |
|   | 8  | 129302605 | 129311160 | NM_174987    | chr8  | 129308490 | 129309174 |
|   | 10 | 129275205 | 129283704 | NM_207159    | chr10 | 129282851 | 129283540 |
|   | 6  | 129238548 | 129247062 | NM_001033122 | chr6  | 129240021 | 129240661 |
|   | 10 | 129139365 | 129147864 | NM_146553    | chr10 | 129142795 | 129143479 |
|   | 10 | 129139365 | 129147864 | NM_146553    | chr10 | 129141077 | 129141971 |
|   | 10 | 128923178 | 128931677 | NM_146930    | chr10 | 128924592 | 128925287 |
|   | 10 | 128869643 | 128878142 | NM_146551    | chr10 | 128875700 | 128876412 |
|   | 10 | 128859627 | 128868126 | NM_001011822 | chr10 | 128867417 | 128868048 |
|   | 10 | 128784584 | 128793083 | NM_146729    | chr10 | 128790377 | 128791481 |
|   | 2  | 128786455 | 128795006 | NM_009086    | chr2  | 128787539 | 128788207 |
|   | 6  | 128751622 | 128760214 | NM_008527    | chr6  | 128756748 | 128757338 |
|   | 10 | 128729832 | 128738331 | NM_146728    | chr10 | 128736120 | 128737156 |
|   | 10 | 128718574 | 128727073 | NM_146284    | chr10 | 128722433 | 128723179 |
|   | 10 | 128635100 | 128643599 | NM_207620    | chr10 | 128640656 | 128641845 |
|   | 10 | 128635100 | 128643599 | NM_207620    | chr10 | 128635533 | 128636163 |
|   | 10 | 128575469 | 128583968 | NM_146266    | chr10 | 128576780 | 128577783 |
|   | 7  | 128530129 | 128538628 | NM_001029982 | chr7  | 128531838 | 128532522 |
|   | 10 | 128512961 | 128521460 | NM_146267    | chr10 | 128515664 | 128516279 |
|   | 10 | 128386798 | 128395297 | NM_146861    | chr10 | 128394787 | 128395773 |
|   | 4  | 128185099 | 128193598 | BC057571     | chr4  | 128186708 | 128187304 |
|   | 8  | 127831845 | 127841144 | NM_053207    | chr8  | 127835891 | 127836412 |
|   | 6  | 127731849 | 127740366 | NM_201371    | chr6  | 127736773 | 127737461 |
|   | 2  | 127210252 | 127218811 | NM_019789    | chr2  | 127217739 | 127218338 |
|   | 10 | 127198103 | 127206632 | NM_009040    | chr10 | 127198805 | 127199813 |
|   | 10 | 126687757 | 126696258 | NM_007837    | chr10 | 126696191 | 126696855 |
|   | 10 | 126689221 | 126697720 | NM_033072    | chr10 | 126696191 | 126696855 |
|   | 7  | 126632701 | 126641200 | NM_010069    | chr7  | 126638168 | 126638925 |
|   | 7  | 126602032 | 126618300 | BC093505     | chr7  | 126612099 | 126612839 |
|   | 3  | 126582995 | 126591873 | NM_001025439 | chr3  | 126590130 | 126590733 |
|   | 7  | 126414119 | 126422637 | NM_019738    | chr7  | 126416374 | 126416960 |

|    |           |           |              |       |           |           |
|----|-----------|-----------|--------------|-------|-----------|-----------|
| 2  | 126392804 | 126401305 | NM_019729    | chr2  | 126398660 | 126399319 |
| 7  | 126291951 | 126300450 | NM_183020    | chr7  | 126295443 | 126296024 |
| 7  | 125496337 | 125504836 | NM_207239    | chr7  | 125499366 | 125500293 |
| 1  | 125236871 | 125245370 | BC063074     | chr1  | 125243128 | 125244376 |
| 2  | 124932699 | 124941675 | NM_023595    | chr2  | 124941171 | 124941622 |
| 6  | 124696175 | 124712906 | NM_013535    | chr6  | 124704327 | 124705006 |
| 2  | 124295737 | 124304942 | NM_172537    | chr2  | 124296037 | 124296667 |
| 6  | 124264275 | 124272825 | NM_053094    | chr6  | 124270519 | 124271680 |
| 4  | 124211133 | 124219664 | BC092058     | chr4  | 124217604 | 124218583 |
| 9  | 123944982 | 123956972 | NM_009915    | chr9  | 123949359 | 123950533 |
| 9  | 123824707 | 123833206 | NM_007718    | chr9  | 123830135 | 123831074 |
| 9  | 123824707 | 123833206 | NM_007718    | chr9  | 123826287 | 123826884 |
| 9  | 123649173 | 123657696 | NM_030712    | chr9  | 123654818 | 123655708 |
| 9  | 123525031 | 123533543 | NM_139142    | chr9  | 123531394 | 123532003 |
| 9  | 123521137 | 123529636 | NM_009913    | chr9  | 123522757 | 123523771 |
| 3  | 123432935 | 123441532 | NM_008939    | chr3  | 123433508 | 123434262 |
| 14 | 123325583 | 123334082 | NM_010201    | chr14 | 123333395 | 123333996 |
| 14 | 123325583 | 123334082 | NM_010201    | chr14 | 123331677 | 123332346 |
| 6  | 123221736 | 123230315 | NM_010819    | chr6  | 123223966 | 123225119 |
| 6  | 123189476 | 123197992 | NM_020001    | chr6  | 123196560 | 123197635 |
| 5  | 122962174 | 122970754 | NM_011026    | chr5  | 122966587 | 122967515 |
| 9  | 122877439 | 122885940 | NM_177911    | chr9  | 122879540 | 122880149 |
| 4  | 122823420 | 122831919 | NM_022033    | chr4  | 122825313 | 122826238 |
| 6  | 122814385 | 122827689 | NM_009779    | chr6  | 122816096 | 122816946 |
| 9  | 122699594 | 122708093 | BC055684     | chr9  | 122702746 | 122703351 |
| 4  | 122679807 | 122693514 | NM_174998    | chr4  | 122683953 | 122684647 |
| 6  | 122416496 | 122425004 | BC096392     | chr6  | 122419671 | 122420417 |
| 2  | 122316127 | 122331827 | NM_001004174 | chr2  | 122321178 | 122321972 |
| 2  | 122300201 | 122308709 | NM_025961    | chr2  | 122307974 | 122308591 |
| 14 | 122033216 | 122041715 | NM_145466    | chr14 | 122039178 | 122040054 |
| 6  | 121966417 | 121974916 | NM_008646    | chr6  | 121968361 | 121969328 |
| 3  | 121804687 | 121813238 | NM_008991    | chr3  | 121806930 | 121807554 |
| 6  | 121798160 | 121806729 | NM_008645    | chr6  | 121804265 | 121804921 |
| 11 | 121640351 | 121648892 | AB235902     | chr11 | 121647602 | 121648256 |
| 14 | 121604564 | 121613114 | NM_009574    | chr14 | 121612753 | 121613105 |
| 6  | 121595846 | 121604351 | NM_175628    | chr6  | 121601003 | 121601599 |
| 6  | 121595846 | 121604351 | NM_175628    | chr6  | 121599369 | 121600146 |
| 9  | 121553084 | 121561586 | NM_026794    | chr9  | 121561052 | 121561551 |
| 9  | 121485414 | 121494031 | NM_011703    | chr9  | 121491371 | 121492088 |
| 9  | 121487765 | 121496794 | NM_026915    | chr9  | 121491371 | 121492088 |
| 11 | 121245050 | 121253561 | NM_001038699 | chr11 | 121250346 | 121250970 |
| 5  | 121169468 | 121177982 | NM_133893    | chr5  | 121176758 | 121177550 |
| 14 | 121163854 | 121172353 | NM_001037744 | chr14 | 121167955 | 121168579 |
| 3  | 121161218 | 121169717 | NM_028456    | chr3  | 121167375 | 121168165 |
| 14 | 121123544 | 121132043 | BC017635     | chr14 | 121130805 | 121131451 |
| 11 | 120852998 | 120861508 | NM_009854    | chr11 | 120859281 | 120859895 |
| 2  | 120825877 | 120836081 | NM_029475    | chr2  | 120831980 | 120832633 |

|    |           |           |              |       |           |           |
|----|-----------|-----------|--------------|-------|-----------|-----------|
| 11 | 120804910 | 120813423 | NM_027874    | chr11 | 120810605 | 120811408 |
| 14 | 120714116 | 120722615 | BC009134     | chr14 | 120716327 | 120717106 |
| 2  | 120269709 | 120278208 | AB000822     | chr2  | 120276895 | 120277538 |
| 9  | 120146771 | 120155270 | NM_144557    | chr9  | 120148146 | 120149015 |
| 6  | 120000899 | 120010226 | NM_198703    | chr6  | 120006883 | 120007530 |
| 9  | 119992440 | 120005908 | NM_008614    | chr9  | 119993196 | 119994026 |
| 8  | 119965927 | 119974426 | NM_029686    | chr8  | 119971497 | 119972103 |
| 2  | 119934179 | 119942776 | NM_177845    | chr2  | 119940703 | 119941306 |
| 3  | 119772763 | 119781268 | NM_019550    | chr3  | 119778512 | 119779085 |
| 12 | 119679879 | 119688378 | BC125343     | chr12 | 119685962 | 119686563 |
| 10 | 119624120 | 119632633 | NM_025431    | chr10 | 119630736 | 119631440 |
| 9  | 119463028 | 119471527 | L42342       | chr9  | 119468192 | 119468606 |
| 6  | 119439390 | 119447904 | NM_133940    | chr6  | 119444520 | 119445154 |
| 14 | 119404843 | 119413350 | NM_175341    | chr14 | 119410677 | 119411460 |
| 6  | 119293853 | 119302352 | NM_172492    | chr6  | 119298497 | 119299219 |
| 7  | 119266962 | 119276404 | NM_009470    | chr7  | 119269405 | 119270239 |
| 7  | 119247917 | 119256421 | NM_025989    | chr7  | 119255587 | 119256196 |
|    | 118511727 | 118520329 | NM_138742    | chrX  | 118513080 | 118513677 |
| 4  | 118430273 | 118438772 | NM_207570    | chr4  | 118437671 | 118438648 |
| 6  | 118418626 | 118427125 | NM_028335    | chr6  | 118426355 | 118426975 |
| 5  | 118424794 | 118433293 | NM_007545    | chr5  | 118425088 | 118425627 |
| 4  | 118385017 | 118393516 | NM_146334    | chr4  | 118391656 | 118392271 |
| 4  | 118360715 | 118369214 | NM_001011856 | chr4  | 118367097 | 118367893 |
| 4  | 118325871 | 118334370 | NM_207157    | chr4  | 118329160 | 118330073 |
| 4  | 118325871 | 118334370 | NM_207157    | chr4  | 118327047 | 118328064 |
| 11 | 118229385 | 118241176 | NM_029502    | chr11 | 118233404 | 118234410 |
| 4  | 118157451 | 118165950 | NM_146315    | chr4  | 118163240 | 118164436 |
| 2  | 118097787 | 118106286 | AF193342     | chr2  | 118101265 | 118102084 |
| 13 | 118012563 | 118021062 | BC021315     | chr13 | 118016102 | 118016868 |
| 4  | 117920025 | 117930132 | NM_001039176 | chr4  | 117920071 | 117920854 |
| 3  | 117858299 | 117866940 | BC087942     | chr3  | 117858454 | 117859200 |
| 10 | 117838040 | 117846610 | NM_008337    | chr10 | 117838389 | 117839183 |
| 4  | 117630323 | 117638846 | NM_009176    | chr4  | 117631402 | 117632532 |
| 13 | 117427868 | 117436370 | NM_021459    | chr13 | 117429184 | 117430115 |
| 5  | 117374391 | 117382976 | NM_178622    | chr5  | 117378732 | 117379325 |
| 2  | 117031659 | 117040318 | NM_011246    | chr2  | 117031974 | 117032682 |
| 2  | 116926324 | 116943689 | NM_026620    | chr2  | 116930162 | 116930795 |
| 12 | 116717231 | 116725730 | NM_028731    | chr12 | 116724715 | 116725318 |
| 5  | 116547463 | 116555984 | NM_177759    | chr5  | 116553988 | 116554652 |
| 3  | 116497606 | 116506150 | NM_025517    | chr3  | 116501714 | 116502424 |
| 3  | 116499111 | 116507644 | NM_010022    | chr3  | 116501714 | 116502424 |
| 6  | 116453230 | 116461729 | NM_146912    | chr6  | 116458914 | 116459629 |
| 3  | 116413491 | 116422027 | BC072644     | chr3  | 116419922 | 116420769 |
| 10 | 116351991 | 116360490 | NM_001003950 | chr10 | 116358215 | 116359242 |
| 13 | 116050420 | 116061944 | NM_008396    | chr13 | 116051001 | 116051607 |
| 3  | 115993481 | 116002835 | NM_021388    | chr3  | 115998511 | 115999250 |
| 3  | 115996767 | 116005383 | NM_023214    | chr3  | 115998511 | 115999250 |

X

|   |    |           |           |              |       |           |           |
|---|----|-----------|-----------|--------------|-------|-----------|-----------|
|   | 7  | 115783736 | 115792235 | NM_011445    | chr7  | 115788445 | 115789590 |
|   | 10 | 115699606 | 115708114 | NM_029928    | chr10 | 115701538 | 115702319 |
|   | 5  | 115684684 | 115693183 | NM_008629    | chr5  | 115687912 | 115688497 |
|   | 12 | 115604181 | 115612680 | BC103785     | chr12 | 115606349 | 115607165 |
|   | 5  | 115596246 | 115604748 | NM_026933    | chr5  | 115596762 | 115597723 |
|   | 10 | 115416509 | 115425039 | NM_011217    | chr10 | 115420498 | 115421133 |
|   | 4  | 115331178 | 115339684 | NM_021461    | chr4  | 115332244 | 115332894 |
|   | 13 | 115269971 | 115278470 | NM_177004    | chr13 | 115274970 | 115275582 |
|   | 6  | 115214949 | 115223468 | NM_080639    | chr6  | 115219470 | 115220282 |
|   | 10 | 115215381 | 115224120 | NM_146010    | chr10 | 115218316 | 115219028 |
|   | 11 | 115133015 | 115141514 | AB087504     | chr11 | 115135097 | 115135541 |
|   | 11 | 115135492 | 115144008 | NM_176847    | chr11 | 115135097 | 115135541 |
|   | 11 | 114973431 | 114981992 | NM_012030    | chr11 | 114977795 | 114978396 |
|   | 11 | 114964268 | 114972774 | NM_021411    | chr11 | 114967180 | 114967812 |
|   | 12 | 114901434 | 114909951 | BC108375     | chr12 | 114904294 | 114905002 |
|   | 12 | 114733921 | 114742420 | BC002091     | chr12 | 114735892 | 114736730 |
|   | 11 | 114700131 | 114708911 | NM_170758    | chr11 | 114701493 | 114702238 |
|   | 4  | 114629410 | 114637909 | NM_001003947 | chr4  | 114636227 | 114636887 |
| X |    | 114538179 | 114546761 | BC111833     | chrX  | 114545968 | 114546413 |
|   | 4  | 114421446 | 114429945 | NM_015758    | chr4  | 114429322 | 114429853 |
|   | 12 | 114410160 | 114418669 | BC085312     | chr12 | 114415372 | 114415959 |
|   | 14 | 113968089 | 113976759 | NM_175500    | chr14 | 113973662 | 113974628 |
|   | 12 | 113931319 | 113939852 | NM_001009545 | chr12 | 113934351 | 113935393 |
|   | 8  | 113911895 | 113924426 | NM_172284    | chr8  | 113923389 | 113923996 |
|   | 2  | 113702561 | 113711060 | NM_010290    | chr2  | 113706059 | 113706929 |
|   | 8  | 113690050 | 113698580 | NM_029646    | chr8  | 113692780 | 113693799 |
|   | 12 | 113582339 | 113590868 | NM_024223    | chr12 | 113588256 | 113589125 |
|   | 2  | 113548563 | 113565485 | NM_011824    | chr2  | 113555521 | 113556157 |
|   | 12 | 113540086 | 113548630 | NM_054081    | chr12 | 113543642 | 113544391 |
|   | 8  | 113517046 | 113525545 | BC032215     | chr8  | 113517191 | 113518258 |
|   | 6  | 113418261 | 113439850 | NM_145826    | chr6  | 113425849 | 113426512 |
|   | 13 | 113403329 | 113412197 | NM_029898    | chr13 | 113407569 | 113408291 |
|   | 11 | 113379353 | 113387858 | NM_027216    | chr11 | 113385637 | 113386238 |
|   | 6  | 113349298 | 113366034 | NM_133923    | chr6  | 113356795 | 113357677 |
|   | 2  | 113080571 | 113089070 | NM_029232    | chr2  | 113085866 | 113086849 |
|   | 6  | 113064814 | 113073313 | BC083184     | chr6  | 113072530 | 113073147 |
|   | 6  | 113006099 | 113015690 | NM_008188    | chr6  | 113014776 | 113015362 |
|   | 8  | 112962891 | 112971390 | NM_175480    | chr8  | 112963365 | 112964005 |
|   | 8  | 112848798 | 112857301 | NM_028584    | chr8  | 112851539 | 112852189 |
|   | 5  | 112659605 | 112668104 | AF220355     | chr5  | 112663158 | 112664310 |
|   | 6  | 112659911 | 112668447 | NM_021385    | chr6  | 112662297 | 112663186 |
|   | 13 | 112606091 | 112616736 | NM_028487    | chr13 | 112610938 | 112611551 |
|   | 11 | 112478266 | 112486765 | BC038907     | chr11 | 112480419 | 112481019 |
|   | 9  | 112028305 | 112038806 | NM_033264    | chr9  | 112037650 | 112038310 |
|   | 9  | 112028305 | 112038806 | NM_033264    | chr9  | 112035019 | 112035861 |
|   | 12 | 112016344 | 112025278 | NM_021516    | chr12 | 112023742 | 112024335 |
|   | 2  | 111936786 | 111945285 | NM_146448    | chr2  | 111940852 | 111941442 |

|    |           |           |              |       |           |           |
|----|-----------|-----------|--------------|-------|-----------|-----------|
| 7  | 111878288 | 111886787 | BC057362     | chr7  | 111881571 | 111882525 |
| 2  | 111820192 | 111828691 | NM_146274    | chr2  | 111824702 | 111825406 |
| 2  | 111820192 | 111828691 | NM_146274    | chr2  | 111821609 | 111822291 |
| 2  | 111782436 | 111790935 | NM_146447    | chr2  | 111783607 | 111784761 |
| 2  | 111759411 | 111767910 | NM_207151    | chr2  | 111760783 | 111761647 |
| 2  | 111575152 | 111583651 | NM_146889    | chr2  | 111581151 | 111582149 |
| 4  | 111394202 | 111406728 | NM_145551    | chr4  | 111399392 | 111400204 |
| 2  | 111336627 | 111345126 | NM_146885    | chr2  | 111337851 | 111338581 |
| 2  | 111243981 | 111252480 | NM_001011773 | chr2  | 111249719 | 111250875 |
| 2  | 111219289 | 111227788 | NM_207254    | chr2  | 111220719 | 111221750 |
| 2  | 111173806 | 111182305 | NM_146381    | chr2  | 111179532 | 111180505 |
| 2  | 111163430 | 111171929 | NM_207236    | chr2  | 111169436 | 111170630 |
| 12 | 111141590 | 111150202 | NM_010480    | chr12 | 111143136 | 111144005 |
| 2  | 111134416 | 111142915 | NM_146907    | chr2  | 111136004 | 111136729 |
| 2  | 111051956 | 111060455 | NM_146395    | chr2  | 111058166 | 111058823 |
| 5  | 111047567 | 111056383 | NM_009469    | chr5  | 111052959 | 111053729 |
| 5  | 111047567 | 111056383 | NM_009469    | chr5  | 111051400 | 111051991 |
| 2  | 111027891 | 111038630 | NM_026248    | chr2  | 111031412 | 111032362 |
| 10 | 110871336 | 110887678 | NM_015781    | chr10 | 110887195 | 110887726 |
| 9  | 110636982 | 110645500 | NM_153099    | chr9  | 110643932 | 110644533 |
| 5  | 110568162 | 110576661 | BC002275     | chr5  | 110572957 | 110573415 |
| 8  | 110475060 | 110483611 | NM_010817    | chr8  | 110481941 | 110482559 |
| 5  | 110370162 | 110378677 | NM_172717    | chr5  | 110372581 | 110372926 |
| 10 | 110318286 | 110326811 | NM_007792    | chr10 | 110319699 | 110320977 |
| 3  | 110268782 | 110278067 | NM_030699    | chr3  | 110272411 | 110273079 |
| 8  | 110149899 | 110158420 | BC093500     | chr8  | 110154147 | 110155001 |
| 8  | 109773588 | 109788722 | NM_145412    | chr8  | 109773782 | 109774399 |
| 9  | 109668033 | 109676550 | NM_183136    | chr9  | 109672331 | 109673287 |
| 9  | 109668033 | 109676550 | NM_183136    | chr9  | 109671602 | 109671962 |
| 7  | 109570223 | 109579202 | NM_020610    | chr7  | 109572177 | 109573042 |
| 2  | 109487275 | 109497807 | NM_001048142 | chr2  | 109492163 | 109492828 |
| 2  | 109469539 | 109480432 | NM_007540    | chr2  | 109476152 | 109476753 |
| 9  | 109350761 | 109359260 | NM_177703    | chr9  | 109352638 | 109353431 |
| 9  | 109336701 | 109345200 | NM_177070    | chr9  | 109336860 | 109338081 |
| 1  | 109244236 | 109252742 | NM_027548    | chr1  | 109248863 | 109249502 |
| 1  | 109183861 | 109199422 | NM_025867    | chr1  | 109191655 | 109192348 |
| 9  | 109089631 | 109098130 | NM_001008428 | chr9  | 109091614 | 109092302 |
| 8  | 109062229 | 109070728 | BC038404     | chr8  | 109067758 | 109068344 |
| 5  | 109033166 | 109041665 | NM_026109    | chr5  | 109033161 | 109033787 |
| 13 | 108851722 | 108860221 | BC021311     | chr13 | 108854250 | 108854866 |
| 1  | 108755996 | 108764495 | NM_027971    | chr1  | 108758307 | 108759032 |
| 9  | 108705260 | 108714460 | NM_134420    | chr9  | 108706311 | 108706843 |
| 3  | 108687927 | 108696439 | NM_026198    | chr3  | 108692187 | 108692835 |
| 5  | 108664679 | 108673178 | BC062209     | chr5  | 108667171 | 108668175 |
| 3  | 108570705 | 108585711 | NM_011319    | chr3  | 108582165 | 108582666 |
| 3  | 108505899 | 108515409 | NM_019976    | chr3  | 108506003 | 108506739 |
| 7  | 108406991 | 108423670 | NM_146743    | chr7  | 108413116 | 108414109 |

|    |           |           |              |       |           |           |
|----|-----------|-----------|--------------|-------|-----------|-----------|
| 7  | 108397486 | 108405985 | NM_001011871 | chr7  | 108403774 | 108405170 |
| 8  | 108383500 | 108391999 | NM_175160    | chr8  | 108387985 | 108388584 |
| 7  | 108329704 | 108338203 | NM_001011527 | chr7  | 108331907 | 108332590 |
| 7  | 108312645 | 108321144 | NM_146739    | chr7  | 108318799 | 108319637 |
| 7  | 108250503 | 108259002 | NM_146307    | chr7  | 108256507 | 108257577 |
| 7  | 108250503 | 108259002 | NM_146307    | chr7  | 108251894 | 108252499 |
| 7  | 108207750 | 108216249 | NM_146738    | chr7  | 108213837 | 108214829 |
| 7  | 108207750 | 108216249 | NM_146738    | chr7  | 108208477 | 108209486 |
| 7  | 108180299 | 108188798 | NM_146364    | chr7  | 108184361 | 108185029 |
| 6  | 108148834 | 108157357 | NM_145937    | chr6  | 108156578 | 108157099 |
| 7  | 108135657 | 108144156 | NM_146310    | chr7  | 108137192 | 108138189 |
| 7  | 108112352 | 108120851 | NM_146497    | chr7  | 108113851 | 108114725 |
| 7  | 108102073 | 108110572 | NM_146736    | chr7  | 108108207 | 108109088 |
| 3  | 108101665 | 108110164 | BC028749     | chr3  | 108106001 | 108106725 |
| 3  | 108069269 | 108077805 | NM_008184    | chr3  | 108069576 | 108070272 |
| 7  | 108044814 | 108053313 | NM_146732    | chr7  | 108050497 | 108051165 |
| 7  | 107948549 | 107957048 | NM_001011810 | chr7  | 107952486 | 107953398 |
| 7  | 107948549 | 107957048 | NM_001011810 | chr7  | 107950069 | 107950787 |
| 7  | 107948549 | 107957048 | NM_001011810 | chr7  | 107948583 | 107949170 |
| 7  | 107888456 | 107896955 | NM_146735    | chr7  | 107894795 | 107895394 |
| 7  | 107884246 | 107892745 | NM_146733    | chr7  | 107885840 | 107886546 |
| 3  | 107643575 | 107652074 | NM_172271    | chr3  | 107645045 | 107645777 |
| 7  | 107634409 | 107642908 | NM_146425    | chr7  | 107635947 | 107636833 |
| 7  | 107612145 | 107620644 | NM_146426    | chr7  | 107613633 | 107614712 |
| 7  | 107612145 | 107620644 | NM_146426    | chr7  | 107612596 | 107613384 |
| 7  | 107599757 | 107608262 | NM_001005488 | chr7  | 107607086 | 107607694 |
| X  | 107577490 | 107585989 | BC054113     | chrX  | 107582896 | 107583535 |
| 4  | 107418967 | 107427466 | NM_009949    | chr4  | 107426781 | 107427317 |
| 7  | 107155967 | 107164667 | NM_021889    | chr7  | 107159455 | 107160183 |
| 9  | 107087461 | 107095960 | NM_153413    | chr9  | 107090046 | 107090849 |
| 2  | 107085493 | 107097901 | NM_021275    | chr2  | 107088952 | 107089546 |
| 11 | 107022999 | 107035022 | BC028271     | chr11 | 107025067 | 107025733 |
| 7  | 106994622 | 107003121 | NM_029660    | chr7  | 107001864 | 107002650 |
| 8  | 106984815 | 106993327 | NM_009868    | chr8  | 106986745 | 106987937 |
| 10 | 106887745 | 106896244 | NM_008656    | chr10 | 106892944 | 106893566 |
| 7  | 106763492 | 106771991 | NM_147035    | chr7  | 106765464 | 106766153 |
| 5  | 106695687 | 106704752 | NM_001005477 | chr5  | 106701157 | 106701678 |
| 5  | 106695687 | 106704752 | NM_001005477 | chr5  | 106695928 | 106697007 |
| 7  | 106632262 | 106640761 | NM_146596    | chr7  | 106638556 | 106639220 |
| 4  | 106522791 | 106531290 | BC028324     | chr4  | 106526199 | 106527246 |
| 7  | 106480879 | 106489378 | NM_146452    | chr7  | 106482343 | 106482980 |
| 7  | 106469634 | 106478133 | NM_146453    | chr7  | 106474072 | 106474759 |
| 7  | 106469634 | 106478133 | NM_146453    | chr7  | 106471416 | 106472347 |
| 3  | 106293090 | 106301595 | NM_009892    | chr3  | 106294981 | 106296259 |
| 3  | 106235438 | 106243942 | NM_023186    | chr3  | 106242687 | 106243511 |
| 7  | 106232223 | 106240722 | NM_001001318 | chr7  | 106234350 | 106235369 |
| 11 | 106128120 | 106136760 | NM_008339    | chr11 | 106134001 | 106134612 |



|    |           |           |              |       |           |           |
|----|-----------|-----------|--------------|-------|-----------|-----------|
| 11 | 106027016 | 106042682 | NM_028074    | chr11 | 106029328 | 106029830 |
| 9  | 105665249 | 105673748 | NM_172927    | chr9  | 105672266 | 105672848 |
| 5  | 105650077 | 105658576 | NM_001033550 | chr5  | 105652989 | 105653605 |
| 7  | 105607813 | 105636302 | NM_009906    | chr7  | 105616069 | 105616902 |
| 7  | 105504777 | 105522297 | NM_018880    | chr7  | 105507017 | 105507738 |
| 2  | 105463735 | 105488220 | NM_013627    | chr2  | 105485665 | 105486281 |
| 7  | 105236051 | 105244550 | NM_146355    | chr7  | 105242407 | 105243003 |
| 7  | 105201530 | 105217535 | NM_147061    | chr7  | 105202336 | 105202928 |
| 7  | 105181803 | 105190302 | NM_146750    | chr7  | 105188474 | 105188861 |
| 3  | 104943781 | 104952298 | NM_008619    | chr3  | 104945199 | 104946018 |
| 7  | 104937290 | 104945789 | NM_146758    | chr7  | 104943567 | 104944157 |
| 7  | 104903021 | 104911520 | NM_147095    | chr7  | 104906471 | 104907069 |
| 7  | 104806349 | 104814848 | NM_147043    | chr7  | 104811918 | 104812516 |
| 7  | 104788616 | 104805583 | NM_147060    | chr7  | 104798799 | 104799408 |
| 14 | 104779919 | 104788418 | NM_011897    | chr14 | 104782398 | 104783058 |
| 12 | 104523046 | 104531562 | NM_173024    | chr12 | 104527532 | 104527988 |
| 12 | 104523046 | 104531562 | NM_173024    | chr12 | 104524078 | 104524669 |
| 7  | 104518627 | 104527126 | NM_147049    | chr7  | 104522441 | 104523197 |
| 7  | 104518627 | 104527126 | NM_147049    | chr7  | 104518009 | 104519208 |
| 7  | 104447445 | 104464039 | NM_146379    | chr7  | 104451808 | 104452411 |
| 7  | 104432044 | 104440543 | NM_147048    | chr7  | 104437827 | 104438746 |
| 12 | 104297940 | 104312000 | NM_009245    | chr12 | 104300924 | 104301415 |
| 5  | 104281299 | 104289826 | NM_028794    | chr5  | 104282136 | 104282704 |
| 7  | 104061527 | 104070026 | NM_147055    | chr7  | 104064081 | 104065099 |
| 7  | 104051728 | 104060227 | NM_146751    | chr7  | 104053250 | 104053838 |
| 7  | 103907619 | 103916118 | NM_147072    | chr7  | 103913961 | 103914567 |
| 5  | 103893523 | 103902026 | BC049644     | chr5  | 103896248 | 103897057 |
| 7  | 103871080 | 103879579 | NM_147120    | chr7  | 103876957 | 103877597 |
| 2  | 103861357 | 103874348 | NM_181858    | chr2  | 103868984 | 103869730 |
| 3  | 103859115 | 103873062 | NM_133859    | chr3  | 103868309 | 103869207 |
| X  | 103864683 | 103873182 | NM_145224    | chrX  | 103867935 | 103868594 |
| 2  | 103861357 | 103874348 | NM_181858    | chr2  | 103865415 | 103866031 |
| 7  | 103846997 | 103855496 | NM_147118    | chr7  | 103854194 | 103854796 |
| 7  | 103846997 | 103855496 | NM_147118    | chr7  | 103852658 | 103853327 |
| 7  | 103805203 | 103813702 | NM_147119    | chr7  | 103812276 | 103812948 |
| 5  | 103659481 | 103668302 | NM_011204    | chr5  | 103663667 | 103664253 |
| 7  | 103598172 | 103608163 | NM_147097    | chr7  | 103605603 | 103606651 |
| 7  | 103584417 | 103592916 | NM_001025386 | chr7  | 103588145 | 103589144 |
| 7  | 103584417 | 103592916 | NM_001025386 | chr7  | 103586916 | 103587593 |
| 7  | 103483673 | 103492172 | NM_146812    | chr7  | 103488006 | 103488780 |
| 7  | 103465139 | 103479976 | NM_147076    | chr7  | 103477447 | 103478049 |
| 6  | 103470649 | 103479148 | NM_007697    | chr6  | 103474785 | 103476054 |
| 7  | 103451845 | 103460344 | NM_146841    | chr7  | 103456808 | 103457998 |
| 11 | 103450527 | 103460964 | NM_027083    | chr11 | 103455092 | 103455682 |
| 7  | 103418189 | 103426688 | NM_147100    | chr7  | 103425446 | 103426344 |
| 15 | 103390588 | 103399112 | NM_008134    | chr15 | 103391202 | 103391784 |
| 7  | 103314443 | 103322942 | NM_001011854 | chr7  | 103320986 | 103321591 |

|    |           |           |              |       |           |           |
|----|-----------|-----------|--------------|-------|-----------|-----------|
| 7  | 103319160 | 103327659 | NM_147094    | chr7  | 103320986 | 103321591 |
| 2  | 103283434 | 103291962 | NM_009804    | chr2  | 103288425 | 103289032 |
| 7  | 103079683 | 103096040 | NM_146380    | chr7  | 103093825 | 103094433 |
| 7  | 103027067 | 103035566 | NM_147052    | chr7  | 103028680 | 103029633 |
| 7  | 102994103 | 103002603 | NM_147111    | chr7  | 102995873 | 102996990 |
| 7  | 102994103 | 103002603 | NM_147111    | chr7  | 102995076 | 102995745 |
| 12 | 102950019 | 102958546 | NM_007693    | chr12 | 102953473 | 102954165 |
| 12 | 102864185 | 102875544 | NM_013747    | chr12 | 102870523 | 102871119 |
| 3  | 102857590 | 102866330 | NM_027533    | chr3  | 102860922 | 102861509 |
| 10 | 102791496 | 102800030 | NM_175328    | chr10 | 102797188 | 102797796 |
| 7  | 102768163 | 102776662 | NM_147110    | chr7  | 102771978 | 102773050 |
| 7  | 102585733 | 102594232 | NM_147073    | chr7  | 102586934 | 102587684 |
| 10 | 102455948 | 102464465 | NM_172553    | chr10 | 102456940 | 102457778 |
| 7  | 102402570 | 102418258 | NM_147079    | chr7  | 102415158 | 102415868 |
| 2  | 102250132 | 102258631 | NM_010218    | chr2  | 102256065 | 102256498 |
| 11 | 102130065 | 102141186 | NM_011551    | chr11 | 102131406 | 102132039 |
| 4  | 102081799 | 102090298 | BC071259     | chr4  | 102089353 | 102089955 |
| 13 | 102044663 | 102053168 | BC012687     | chr13 | 102045031 | 102046274 |
| 7  | 101933332 | 101959436 | NM_011644    | chr7  | 101954719 | 101955338 |
| 13 | 101912394 | 101920898 | BC029217     | chr13 | 101917779 | 101918536 |
| 10 | 101798125 | 101806639 | NM_026243    | chr10 | 101804365 | 101804961 |
| 10 | 101798125 | 101806639 | NM_026243    | chr10 | 101801071 | 101801721 |
| 7  | 101792505 | 101801004 | BC025128     | chr7  | 101799823 | 101800481 |
| 7  | 101764238 | 101782293 | NM_025605    | chr7  | 101765140 | 101765731 |
| 11 | 101707945 | 101716444 | NM_010791    | chr11 | 101708633 | 101709264 |
| 15 | 101695153 | 101703652 | NM_001003667 | chr15 | 101701466 | 101701819 |
| 15 | 101695153 | 101703652 | NM_001003667 | chr15 | 101700642 | 101701275 |
| 15 | 101695153 | 101703652 | NM_001003667 | chr15 | 101696660 | 101697242 |
| 7  | 101686311 | 101694810 | NM_008887    | chr7  | 101693423 | 101694073 |
| 7  | 101427218 | 101435717 | NM_007490    | chr7  | 101428143 | 101429120 |
| 11 | 101278428 | 101286927 | NM_009708    | chr11 | 101280447 | 101281060 |
| 11 | 101279737 | 101288289 | NM_012037    | chr11 | 101280447 | 101281060 |
| 7  | 101245943 | 101261846 | NM_001040112 | chr7  | 101257734 | 101258535 |
| 11 | 101056424 | 101079231 | NM_175638    | chr11 | 101076351 | 101077054 |
| 3  | 101045359 | 101054175 | NM_194343    | chr3  | 101048761 | 101049393 |
| 4  | 100911222 | 100920194 | NM_009647    | chr4  | 100918282 | 100919159 |
| 11 | 100752971 | 100761601 | NM_213659    | chr11 | 100760462 | 100761065 |
| 11 | 100752971 | 100761601 | NM_213659    | chr11 | 100757962 | 100758564 |
| 12 | 100507380 | 100515879 | NM_008947    | chr12 | 100510087 | 100510895 |
| 13 | 100278980 | 100287479 | NM_001004149 | chr13 | 100284581 | 100285194 |
| 11 | 100006837 | 100015336 | NM_201255    | chr11 | 100013750 | 100014403 |
| 10 | 99914536  | 99923035  | NM_001033332 | chr10 | 99918719  | 99919351  |
| 11 | 99855123  | 99863644  | NM_027563    | chr11 | 99859054  | 99859726  |
| 11 | 99829786  | 99838302  | NM_027983    | chr11 | 99833051  | 99833529  |
| 6  | 99689325  | 99697855  | NM_015768    | chr6  | 99692381  | 99692980  |
| 11 | 99665196  | 99673695  | NM_001013823 | chr11 | 99669425  | 99670106  |
| 7  | 99635247  | 99643746  | NM_146356    | chr7  | 99635290  | 99636053  |

|   |    |          |                       |       |          |          |
|---|----|----------|-----------------------|-------|----------|----------|
|   | 11 | 99623483 | 99631982 NM_027087    | chr11 | 99623414 | 99623835 |
| X |    | 99518117 | 99526628 NM_007674    | chrX  | 99524690 | 99525523 |
|   | 11 | 99356749 | 99378943 NM_001039666 | chr11 | 99368387 | 99369131 |
| X |    | 98999682 | 99009451 BC116811     | chrX  | 99002281 | 99002960 |
|   | 12 | 98976491 | 98984990 NM_029911    | chr12 | 98979454 | 98980253 |
|   | 7  | 98705321 | 98716589 NM_009519    | chr7  | 98706921 | 98707795 |
|   | 13 | 98588956 | 98597455 BC054101     | chr13 | 98589403 | 98589996 |
|   | 15 | 98553665 | 98562232 NM_024169    | chr15 | 98556318 | 98556946 |
|   | 15 | 98502993 | 98511495 NM_172612    | chr15 | 98509231 | 98510230 |
|   | 11 | 98474441 | 98482951 NM_021347    | chr11 | 98478446 | 98479050 |
|   | 13 | 98335788 | 98344672 NM_007930    | chr13 | 98339143 | 98340277 |
|   | 15 | 98319508 | 98328007 NM_001001807 | chr15 | 98323610 | 98324343 |
|   | 11 | 98158828 | 98177040 NM_021547    | chr11 | 98161618 | 98162431 |
|   | 15 | 98139083 | 98147582 NM_001011778 | chr15 | 98142041 | 98142948 |
|   | 15 | 98082814 | 98091336 NM_027304    | chr15 | 98089307 | 98090181 |
|   | 4  | 98032652 | 98041490 NM_007704    | chr4  | 98037086 | 98037766 |
|   | 15 | 97989694 | 97998429 NM_177716    | chr15 | 97992836 | 97993517 |
|   | 9  | 97840020 | 97848519 NM_022319    | chr9  | 97846515 | 97847288 |
| X |    | 97495929 | 97504428 NM_172932    | chrX  | 97497836 | 97498434 |
|   | 3  | 97494085 | 97502584 NM_146275    | chr3  | 97496505 | 97497102 |
| X |    | 97482743 | 97491242 BC057085     | chrX  | 97483374 | 97484032 |
|   | 1  | 97323003 | 97331504 BC037146     | chr1  | 97327498 | 97328382 |
|   | 6  | 97274984 | 97283483 BC058262     | chr6  | 97281093 | 97281832 |
|   | 4  | 97258690 | 97272444 NM_010905    | chr4  | 97263903 | 97264763 |
|   | 15 | 97183047 | 97191546 BC038822     | chr15 | 97184815 | 97185427 |
|   | 3  | 97111821 | 97120320 NM_008121    | chr3  | 97117395 | 97118545 |
|   | 10 | 96989491 | 96998017 NM_008524    | chr10 | 96996479 | 96997199 |
|   | 10 | 96989491 | 96998017 NM_008524    | chr10 | 96990216 | 96990791 |
|   | 11 | 96975437 | 96983936 BC004096     | chr11 | 96978792 | 96979485 |
| X |    | 96926659 | 96935219 NM_023608    | chrX  | 96927013 | 96927740 |
|   | 3  | 96909531 | 96918030 NM_021517    | chr3  | 96916808 | 96917522 |
|   | 11 | 96860716 | 96869215 BC085242     | chr11 | 96864649 | 96865035 |
|   | 3  | 96376875 | 96385374 NM_010186    | chr3  | 96384272 | 96384884 |
|   | 16 | 96379942 | 96388441 NM_033149    | chr16 | 96383356 | 96383995 |
|   | 15 | 96192970 | 96201469 BC027180     | chr15 | 96194804 | 96195287 |
|   | 11 | 96175848 | 96184350 NM_008266    | chr11 | 96182546 | 96183151 |
|   | 11 | 96175848 | 96184350 NM_008266    | chr11 | 96177741 | 96178320 |
|   | 6  | 96129169 | 96137668 NM_030107    | chr6  | 96132979 | 96133820 |
|   | 8  | 96084380 | 96092932 NM_053200    | chr8  | 96090392 | 96090982 |
|   | 12 | 96082076 | 96090588 NM_201518    | chr12 | 96083466 | 96084666 |
|   | 8  | 95843207 | 95852857 NM_009209    | chr8  | 95848262 | 95849106 |
|   | 1  | 95844899 | 95853398 NM_173772    | chr1  | 95845988 | 95846578 |
|   | 8  | 95738478 | 95746977 NM_173014    | chr8  | 95741893 | 95742556 |
|   | 5  | 95707855 | 95724394 BC099941     | chr5  | 95716094 | 95716680 |
|   | 6  | 95681753 | 95690261 NM_011507    | chr6  | 95685887 | 95686599 |
|   | 3  | 95606190 | 95614780 NM_021281    | chr3  | 95611464 | 95612093 |
|   | 4  | 95453315 | 95461896 NM_030014    | chr4  | 95456881 | 95457592 |

|    |          |                       |       |          |          |
|----|----------|-----------------------|-------|----------|----------|
| 3  | 95421691 | 95430190 BC007176     | chr3  | 95426663 | 95427323 |
| 9  | 95363169 | 95371668 NM_198414    | chr9  | 95367803 | 95368510 |
| 16 | 95360449 | 95368995 NM_019664    | chr16 | 95363264 | 95364854 |
| 3  | 95324014 | 95332610 NM_001024841 | chr3  | 95331988 | 95332533 |
| 13 | 95152549 | 95161048 NM_172589    | chr13 | 95156683 | 95157290 |
| 11 | 94882789 | 94898891 NM_013565    | chr11 | 94885129 | 94885717 |
| 11 | 94801302 | 94814663 NM_172261    | chr11 | 94808131 | 94809031 |
| 13 | 94769186 | 94777690 NM_028772    | chr13 | 94776377 | 94776980 |
| 13 | 94772533 | 94781052 NM_022884    | chr13 | 94776377 | 94776980 |
| 1  | 94758782 | 94767759 NM_011796    | chr1  | 94762023 | 94762650 |
| 8  | 94688003 | 94696782 NM_008393    | chr8  | 94689717 | 94690334 |
| 15 | 94451365 | 94459929 NM_178789    | chr15 | 94453971 | 94454588 |
| 1  | 94432245 | 94440744 NM_146491    | chr1  | 94435418 | 94436201 |
| 1  | 94412738 | 94429426 NM_146490    | chr1  | 94417637 | 94418221 |
| 1  | 94397531 | 94406030 NM_147037    | chr1  | 94404683 | 94405279 |
| 1  | 94397531 | 94406030 NM_147037    | chr1  | 94402869 | 94403648 |
| 1  | 94397531 | 94406030 NM_147037    | chr1  | 94401960 | 94402540 |
| 1  | 94319660 | 94328159 NM_001011525 | chr1  | 94325517 | 94326112 |
| 1  | 94301665 | 94317025 NM_024197    | chr1  | 94313816 | 94314628 |
| 4  | 94225313 | 94233817 NM_013690    | chr4  | 94226339 | 94226982 |
| 16 | 93894878 | 93903377 NM_019500    | chr16 | 93897448 | 93898083 |
| 5  | 93507785 | 93516399 NM_183392    | chr5  | 93510317 | 93511109 |
| 3  | 93473103 | 93481602 NM_009100    | chr3  | 93474736 | 93475161 |
| 3  | 93098569 | 93110463 NM_025420    | chr3  | 93104557 | 93105343 |
| 1  | 93074972 | 93083471 NM_026454    | chr1  | 93080239 | 93080981 |
| 3  | 93071629 | 93080128 NM_001018079 | chr3  | 93078884 | 93079719 |
| 1  | 93004229 | 93012980 NM_016894    | chr1  | 93006894 | 93007522 |
| 1  | 93004229 | 93012980 NM_016894    | chr1  | 93005346 | 93005982 |
| 3  | 92803254 | 92811753 NM_026394    | chr3  | 92807108 | 92807786 |
| 16 | 92712052 | 92720551 BC069929     | chr16 | 92718415 | 92719004 |
| 3  | 92655684 | 92665118 NM_008412    | chr3  | 92663754 | 92664135 |
| 3  | 92655684 | 92665118 NM_008412    | chr3  | 92660709 | 92661315 |
| 10 | 92635709 | 92644208 NM_146239    | chr10 | 92639153 | 92639986 |
| 1  | 92605385 | 92613902 BC057903     | chr1  | 92612531 | 92613019 |
| 3  | 92521676 | 92530182 NM_009265    | chr3  | 92524457 | 92525303 |
| X  | 92493634 | 92502157 NM_177789    | chrX  | 92494363 | 92495032 |
| 3  | 92396108 | 92405188 NM_011469    | chr3  | 92403860 | 92404639 |
| 16 | 92245775 | 92254327 NM_008424    | chr16 | 92250127 | 92250817 |
| 5  | 92208799 | 92217487 NM_009704    | chr5  | 92210273 | 92210920 |
| 2  | 92169229 | 92177872 NM_172670    | chr2  | 92172125 | 92172734 |
| 2  | 92170337 | 92186256 NM_145122    | chr2  | 92172125 | 92172734 |
| 8  | 92075174 | 92083673 BC098233     | chr8  | 92082378 | 92083171 |
| 5  | 91837718 | 91850212 NM_023785    | chr5  | 91842661 | 91843347 |
| 5  | 91828499 | 91837085 NM_009141    | chr5  | 91829297 | 91830323 |
| 2  | 91761939 | 91770438 NM_138306    | chr2  | 91769550 | 91770165 |
| 13 | 91680174 | 91688673 BC023455     | chr13 | 91687384 | 91687976 |
| 13 | 91680174 | 91688673 BC023455     | chr13 | 91685792 | 91686440 |

|    |          |                       |       |          |          |
|----|----------|-----------------------|-------|----------|----------|
| 13 | 91680174 | 91688673 BC023455     | chr13 | 91684454 | 91685316 |
| 16 | 91614959 | 91623458 NM_133679    | chr16 | 91620956 | 91622031 |
| 16 | 91603837 | 91612336 BC019387     | chr16 | 91609704 | 91610304 |
| 8  | 91581180 | 91597828 NM_173369    | chr8  | 91585338 | 91586034 |
| 5  | 91559937 | 91568450 NM_007423    | chr5  | 91566991 | 91568183 |
| 6  | 91475539 | 91484053 NM_026309    | chr6  | 91481394 | 91482353 |
| 9  | 91170104 | 91178603 D78174       | chr9  | 91171075 | 91171724 |
| 15 | 91017008 | 91025574 NM_011994    | chr15 | 91019510 | 91020128 |
| 16 | 91001060 | 91009559 BC002268     | chr16 | 91008247 | 91009008 |
| 16 | 90913647 | 90922146 BC027145     | chr16 | 90919576 | 90920176 |
| 3  | 90779016 | 90787618 NM_009114    | chr3  | 90779509 | 90780123 |
| 2  | 90680697 | 90689276 NM_026161    | chr2  | 90680707 | 90681341 |
| 13 | 90557975 | 90566474 NM_025335    | chr13 | 90562582 | 90563363 |
| 13 | 90561263 | 90569768 NM_028012    | chr13 | 90562582 | 90563363 |
| 10 | 90509998 | 90518569 NM_001042558 | chr10 | 90516485 | 90517489 |
| 11 | 90501173 | 90509691 NM_028011    | chr11 | 90505404 | 90505990 |
| X  | 90481649 | 90490222 NM_001039060 | chrX  | 90481823 | 90482959 |
| 2  | 90378810 | 90387436 NM_008982    | chr2  | 90387076 | 90387417 |
| 8  | 90359902 | 90368401 NM_019626    | chr8  | 90365387 | 90365976 |
| 1  | 90232190 | 90240763 NM_029269    | chr1  | 90237290 | 90237898 |
| 2  | 90195502 | 90204001 NM_146333    | chr2  | 90200390 | 90201873 |
| 2  | 90195502 | 90204001 NM_146333    | chr2  | 90196999 | 90197679 |
| 6  | 90187443 | 90195942 NM_053226    | chr6  | 90193051 | 90193852 |
| 6  | 90187443 | 90195942 NM_053226    | chr6  | 90189315 | 90190140 |
| 6  | 90162321 | 90170820 NM_053223    | chr6  | 90168173 | 90169181 |
| 1  | 90144135 | 90152634 AY095352     | chr1  | 90147516 | 90148466 |
| 3  | 90131329 | 90144402 NM_028475    | chr3  | 90144347 | 90144958 |
| 3  | 90142723 | 90161120 NM_022314    | chr3  | 90144347 | 90144958 |
| 6  | 90138220 | 90146719 NM_053222    | chr6  | 90143782 | 90144858 |
| 1  | 90128453 | 90140382 NM_134252    | chr1  | 90128728 | 90129290 |
| 6  | 90066779 | 90075278 NM_053225    | chr6  | 90072421 | 90073525 |
| 2  | 90064768 | 90073267 NM_146793    | chr2  | 90070511 | 90071217 |
| 2  | 90064768 | 90073267 NM_146793    | chr2  | 90066456 | 90067359 |
| 1  | 90034388 | 90042919 NM_008299    | chr1  | 90040384 | 90041253 |
| 1  | 90037130 | 90045629 NM_201645    | chr1  | 90040384 | 90041253 |
| 2  | 90020835 | 90029335 NM_146265    | chr2  | 90027111 | 90027930 |
| 2  | 90020835 | 90029335 NM_146265    | chr2  | 90022541 | 90024320 |
| 6  | 89999846 | 90008345 NM_053218    | chr6  | 90005917 | 90007619 |
| 3  | 89996590 | 90005089 NM_010559    | chr3  | 90004170 | 90004789 |
| 6  | 89999846 | 90008345 NM_053218    | chr6  | 90001552 | 90003412 |
| 6  | 89981392 | 89989891 NM_053219    | chr6  | 89986801 | 89988120 |
| 1  | 89959980 | 89972048 NM_145079    | chr1  | 89960201 | 89960889 |
| 2  | 89909727 | 89926456 NM_146342    | chr2  | 89919526 | 89920651 |
| 1  | 89895971 | 89904524 NM_201644    | chr1  | 89902007 | 89902602 |
| 6  | 89852778 | 89861277 NM_053227    | chr6  | 89856765 | 89857374 |
| 6  | 89833534 | 89842033 NM_053220    | chr6  | 89839350 | 89839963 |
| 6  | 89833534 | 89842033 NM_053220    | chr6  | 89835333 | 89836012 |

|    |          |          |              |       |          |          |
|----|----------|----------|--------------|-------|----------|----------|
| 17 | 89816245 | 89824755 | D55720       | chr17 | 89819924 | 89820628 |
| 17 | 89816245 | 89824755 | D55720       | chr17 | 89817494 | 89818336 |
| 17 | 89816245 | 89824755 | D55720       | chr17 | 89816361 | 89817015 |
| 6  | 89808620 | 89817119 | NM_053221    | chr6  | 89810513 | 89811211 |
| 6  | 89705928 | 89714485 | NM_053230    | chr6  | 89708189 | 89708922 |
| 6  | 89705928 | 89714485 | NM_053230    | chr6  | 89706413 | 89706870 |
| 2  | 89587690 | 89596189 | NM_146476    | chr2  | 89589846 | 89590467 |
| 2  | 89520546 | 89529045 | NM_207568    | chr2  | 89522191 | 89522818 |
| 9  | 89500331 | 89508884 | NM_025360    | chr9  | 89502657 | 89503253 |
| 2  | 89455873 | 89464372 | NM_146965    | chr2  | 89463579 | 89464157 |
| 2  | 89455873 | 89464372 | NM_146965    | chr2  | 89457129 | 89458210 |
| 7  | 89399868 | 89408367 | BC018517     | chr7  | 89400713 | 89401313 |
| 7  | 89390279 | 89398778 | NM_029614    | chr7  | 89395126 | 89396191 |
| 2  | 89389453 | 89397952 | NM_146792    | chr2  | 89390882 | 89391689 |
| 2  | 89374064 | 89382563 | NM_146788    | chr2  | 89375545 | 89376655 |
| 18 | 89334777 | 89343276 | AB195429     | chr18 | 89341267 | 89341845 |
| 12 | 89302456 | 89310955 | BC060719     | chr12 | 89309888 | 89310927 |
| 12 | 89302456 | 89310955 | BC060719     | chr12 | 89306332 | 89306959 |
| 15 | 89275897 | 89284469 | NM_021921    | chr15 | 89280459 | 89281051 |
| 2  | 89216751 | 89225250 | NM_146970    | chr2  | 89218212 | 89219134 |
| 2  | 89205417 | 89213916 | NM_146790    | chr2  | 89207194 | 89207884 |
| 5  | 89155117 | 89163653 | NM_021289    | chr5  | 89160776 | 89161631 |
| 11 | 89115611 | 89124110 | NM_008711    | chr11 | 89116676 | 89117446 |
| 2  | 89095608 | 89110429 | NM_146454    | chr2  | 89101235 | 89101950 |
| 5  | 89048012 | 89056511 | NM_027631    | chr5  | 89054939 | 89055547 |
| 16 | 89033998 | 89049310 | BC048518     | chr16 | 89045832 | 89046555 |
| 5  | 88956044 | 88964543 | NM_027128    | chr5  | 88959819 | 88960486 |
| 2  | 88873429 | 88881928 | NM_146899    | chr2  | 88875663 | 88876792 |
| 2  | 88822341 | 88830840 | NM_146901    | chr2  | 88823905 | 88824880 |
| 4  | 88750924 | 88759423 | NM_001040654 | chr4  | 88756799 | 88757416 |
| 4  | 88750924 | 88759423 | NM_001040654 | chr4  | 88755546 | 88756227 |
| 16 | 88711868 | 88720368 | NM_013713    | chr16 | 88714751 | 88715554 |
| 16 | 88712478 | 88720993 | NM_013707    | chr16 | 88714751 | 88715554 |
| 10 | 88685090 | 88693589 | NM_178773    | chr10 | 88688125 | 88688769 |
| 2  | 88659446 | 88667945 | NM_001001810 | chr2  | 88666866 | 88667560 |
| 2  | 88659446 | 88667945 | NM_001001810 | chr2  | 88665198 | 88665911 |
| 2  | 88646791 | 88655290 | NM_146463    | chr2  | 88652325 | 88653546 |
| 2  | 88625958 | 88634457 | NM_146896    | chr2  | 88632084 | 88633169 |
| 2  | 88612012 | 88620511 | NM_146462    | chr2  | 88618115 | 88618793 |
| 5  | 88607208 | 88618756 | NM_019878    | chr5  | 88611195 | 88612212 |
| 15 | 88601285 | 88609784 | BC092524     | chr15 | 88607111 | 88608231 |
| 2  | 88589223 | 88597722 | NM_146895    | chr2  | 88595165 | 88596304 |
| 17 | 88571003 | 88582018 | NM_023630    | chr17 | 88573161 | 88573700 |
| 2  | 88566653 | 88575152 | NM_001005227 | chr2  | 88567131 | 88568813 |
| 2  | 88545226 | 88553725 | NM_207567    | chr2  | 88546728 | 88547584 |
| 12 | 88485798 | 88498389 | NM_178657    | chr12 | 88495865 | 88497597 |
| 2  | 88482070 | 88490569 | NM_146753    | chr2  | 88488532 | 88489256 |

|   |    |          |          |              |       |          |          |
|---|----|----------|----------|--------------|-------|----------|----------|
|   | 2  | 88472696 | 88481195 | NM_001011517 | chr2  | 88478833 | 88479585 |
|   | 3  | 88462127 | 88476391 | NM_007541    | chr3  | 88474988 | 88475606 |
|   | 2  | 88472696 | 88481195 | NM_001011517 | chr2  | 88473542 | 88474148 |
|   | 17 | 88432584 | 88441083 | NM_028658    | chr17 | 88432811 | 88433410 |
|   | 2  | 88386645 | 88395144 | NM_146772    | chr2  | 88387591 | 88388180 |
|   | 2  | 88211029 | 88219528 | NM_146918    | chr2  | 88212149 | 88213253 |
|   | 2  | 88186088 | 88194587 | NM_001011868 | chr2  | 88189739 | 88190528 |
|   | 16 | 88175975 | 88185102 | NM_146072    | chr16 | 88177253 | 88178076 |
|   | 3  | 88155480 | 88170231 | NM_172526    | chr3  | 88164676 | 88165269 |
|   | 4  | 88145588 | 88168499 | NM_008336    | chr4  | 88154847 | 88155432 |
|   | 2  | 88073387 | 88081886 | NM_207566    | chr2  | 88079615 | 88080412 |
|   | 2  | 88073387 | 88081886 | NM_207566    | chr2  | 88074815 | 88075666 |
|   | 2  | 87948423 | 87956922 | NM_146294    | chr2  | 87949823 | 87950683 |
|   | 2  | 87923333 | 87931832 | NM_146650    | chr2  | 87924521 | 87925351 |
|   | 1  | 87847114 | 87855631 | NM_027300    | chr1  | 87846698 | 87847173 |
|   | 2  | 87833477 | 87841976 | NM_054090    | chr2  | 87834961 | 87836100 |
|   | 11 | 87728699 | 87737198 | NM_146412    | chr11 | 87730908 | 87731509 |
|   | 2  | 87702014 | 87710513 | NM_146647    | chr2  | 87703678 | 87704264 |
|   | 6  | 87690510 | 87699009 | NM_021418    | chr6  | 87695602 | 87696233 |
|   | 2  | 87627880 | 87636379 | NM_001011519 | chr2  | 87634253 | 87634854 |
|   | 3  | 87605525 | 87615685 | NM_012051    | chr3  | 87610440 | 87611047 |
| X |    | 87578474 | 87587073 | NM_031171    | chrX  | 87581586 | 87582619 |
| X |    | 87578474 | 87587073 | NM_031171    | chrX  | 87580520 | 87581131 |
|   | 10 | 87570791 | 87580462 | NM_028334    | chr10 | 87580304 | 87580934 |
|   | 11 | 87547748 | 87556259 | NM_009296    | chr11 | 87549836 | 87551136 |
|   | 2  | 87492287 | 87500786 | NM_146659    | chr2  | 87493895 | 87494570 |
|   | 6  | 87459442 | 87467941 | NM_175476    | chr6  | 87466606 | 87467467 |
|   | 16 | 87436526 | 87445251 | NM_144854    | chr16 | 87443381 | 87444032 |
|   | 2  | 87423304 | 87431803 | NM_146658    | chr2  | 87429302 | 87430431 |
|   | 11 | 87402412 | 87410913 | NM_133215    | chr11 | 87404089 | 87404715 |
|   | 2  | 87369925 | 87378424 | NM_001011836 | chr2  | 87372685 | 87373366 |
|   | 6  | 87332991 | 87341509 | NM_025467    | chr6  | 87339408 | 87340081 |
|   | 6  | 87332991 | 87341509 | NM_025467    | chr6  | 87338318 | 87338951 |
|   | 2  | 87320888 | 87335373 | NM_206823    | chr2  | 87325968 | 87327059 |
|   | 10 | 87282867 | 87297027 | NM_184052    | chr10 | 87292071 | 87293108 |
|   | 5  | 87269908 | 87278431 | NM_010323    | chr5  | 87269900 | 87270505 |
|   | 2  | 87229328 | 87237827 | NM_147028    | chr2  | 87230902 | 87231658 |
|   | 2  | 87103603 | 87112102 | NM_207632    | chr2  | 87109827 | 87110475 |
|   | 2  | 87046778 | 87055277 | NM_146297    | chr2  | 87049470 | 87050082 |
|   | 8  | 87024394 | 87043858 | NM_145970    | chr8  | 87025786 | 87026407 |
|   | 17 | 87010005 | 87018504 | NM_019654    | chr17 | 87016525 | 87017389 |
|   | 2  | 86934659 | 86943158 | NM_146769    | chr2  | 86942197 | 86942796 |
|   | 10 | 86920465 | 86929459 | NM_008553    | chr10 | 86921414 | 86922260 |
|   | 17 | 86865437 | 86874127 | NM_145491    | chr17 | 86865792 | 86866501 |
|   | 17 | 86850897 | 86862213 | NM_029121    | chr17 | 86853220 | 86854040 |
|   | 2  | 86847574 | 86856073 | NM_146752    | chr2  | 86852132 | 86852723 |
|   | 17 | 86850897 | 86862213 | NM_029121    | chr17 | 86850959 | 86851562 |

|    |          |          |              |       |          |          |
|----|----------|----------|--------------|-------|----------|----------|
| 18 | 86839303 | 86849740 | NM_172633    | chr18 | 86843783 | 86844399 |
| 9  | 86807483 | 86822509 | NM_024195    | chr9  | 86812210 | 86812795 |
| 6  | 86647626 | 86656126 | NM_025665    | chr6  | 86655466 | 86655932 |
| 8  | 86586732 | 86595231 | NM_177262    | chr8  | 86588599 | 86589205 |
| 6  | 86489081 | 86497799 | NM_011865    | chr6  | 86497114 | 86497708 |
| 2  | 86489313 | 86497812 | NM_146846    | chr2  | 86495576 | 86496535 |
| 8  | 86450863 | 86459383 | NM_025843    | chr8  | 86452325 | 86452979 |
| 2  | 86303300 | 86311799 | NM_146406    | chr2  | 86304446 | 86305135 |
| 7  | 86282122 | 86290624 | NM_212436    | chr7  | 86283303 | 86284139 |
| 3  | 86226021 | 86234520 | NM_016959    | chr3  | 86228399 | 86229028 |
| 2  | 86184756 | 86193255 | NM_146391    | chr2  | 86187087 | 86187676 |
| 7  | 86172022 | 86188872 | NM_001011866 | chr7  | 86181693 | 86182627 |
| 10 | 86129611 | 86145216 | NM_001003910 | chr10 | 86135127 | 86136038 |
| 10 | 86132676 | 86141249 | NM_011631    | chr10 | 86135127 | 86136038 |
| 6  | 86042343 | 86050913 | NM_013458    | chr6  | 86049414 | 86049862 |
| 2  | 86016048 | 86024547 | NM_146582    | chr2  | 86022754 | 86023845 |
| 2  | 86016048 | 86024547 | NM_146582    | chr2  | 86017345 | 86018193 |
| 6  | 85988381 | 85996880 | BC053032     | chr6  | 85993608 | 85994260 |
| 2  | 85970155 | 85978654 | NM_147011    | chr2  | 85972051 | 85972927 |
| 2  | 85958708 | 85969786 | NM_146577    | chr2  | 85962958 | 85963553 |
| 2  | 85869581 | 85878080 | NM_207142    | chr2  | 85875396 | 85876823 |
| 6  | 85868019 | 85876518 | NM_029331    | chr6  | 85869475 | 85870081 |
| 2  | 85841323 | 85849822 | NM_001011872 | chr2  | 85848524 | 85849427 |
| 2  | 85841323 | 85849822 | NM_001011872 | chr2  | 85847344 | 85848454 |
| 2  | 85802617 | 85811116 | NM_146579    | chr2  | 85808527 | 85809471 |
| 2  | 85778681 | 85795157 | NM_001011759 | chr2  | 85792605 | 85793491 |
| 2  | 85778681 | 85795157 | NM_001011759 | chr2  | 85791022 | 85791582 |
| 2  | 85778681 | 85795157 | NM_001011759 | chr2  | 85784527 | 85785446 |
| 6  | 85773022 | 85781521 | NM_053097    | chr6  | 85774611 | 85775362 |
| 2  | 85703392 | 85711891 | NM_001005230 | chr2  | 85705294 | 85706060 |
| 2  | 85663433 | 85671932 | NM_146589    | chr2  | 85666870 | 85667594 |
| 2  | 85640129 | 85649075 | NM_147015    | chr2  | 85641585 | 85643178 |
| 15 | 85636316 | 85644815 | NM_197998    | chr15 | 85639293 | 85640007 |
| 2  | 85516246 | 85524745 | NM_146572    | chr2  | 85522320 | 85523169 |
| 2  | 85516246 | 85524745 | NM_146572    | chr2  | 85518897 | 85519979 |
| 10 | 85439137 | 85447649 | NM_177772    | chr10 | 85444336 | 85444940 |
| 10 | 85385083 | 85393592 | NM_145422    | chr10 | 85388631 | 85389110 |
| 11 | 85121449 | 85130069 | NM_016910    | chr11 | 85127213 | 85127982 |
| 18 | 84979602 | 84988106 | NM_025797    | chr18 | 84979744 | 84980310 |
| 17 | 84876378 | 84884877 | U09218       | chr17 | 84881473 | 84882063 |
| 17 | 84876378 | 84884877 | U09218       | chr17 | 84878075 | 84878669 |
| 15 | 84838907 | 84847457 | NM_023478    | chr15 | 84843466 | 84844336 |
| 16 | 84711709 | 84726502 | NM_008065    | chr16 | 84713170 | 84713830 |
| 4  | 84670687 | 84679223 | NM_019535    | chr4  | 84672422 | 84673033 |
| 10 | 84611790 | 84620853 | NM_007771    | chr10 | 84619157 | 84619727 |
| 4  | 84563335 | 84571834 | BC027370     | chr4  | 84571394 | 84571814 |
| 5  | 84427170 | 84435756 | NM_153801    | chr5  | 84429084 | 84429725 |



|    |          |          |              |       |          |          |
|----|----------|----------|--------------|-------|----------|----------|
| 3  | 84296266 | 84312788 | NM_030706    | chr3  | 84296900 | 84297577 |
| 7  | 84283600 | 84292144 | NM_007488    | chr7  | 84288411 | 84289639 |
| 1  | 84161117 | 84169616 | NM_001003948 | chr1  | 84165784 | 84166649 |
| 15 | 84053809 | 84062308 | NM_133167    | chr15 | 84057661 | 84058342 |
| 4  | 84015054 | 84023564 | NM_172870    | chr4  | 84022653 | 84023285 |
| 6  | 83943541 | 83952040 | BC002281     | chr6  | 83944668 | 83945835 |
| 15 | 83890616 | 83899115 | NM_029946    | chr15 | 83891773 | 83892365 |
| 15 | 83773242 | 83781741 | BC056955     | chr15 | 83776708 | 83777247 |
| 6  | 83670922 | 83679429 | NM_011912    | chr6  | 83678355 | 83679194 |
| 6  | 83670922 | 83679429 | NM_011912    | chr6  | 83673770 | 83674588 |
| 6  | 83641016 | 83649515 | NM_144943    | chr6  | 83643143 | 83643790 |
| 8  | 83609763 | 83618262 | BC021922     | chr8  | 83614834 | 83615685 |
| 2  | 83607567 | 83616066 | NM_175514    | chr2  | 83610994 | 83611756 |
| 17 | 83537722 | 83546221 | NM_153512    | chr17 | 83541542 | 83542149 |
| 12 | 83529886 | 83538681 | NM_015812    | chr12 | 83533952 | 83534712 |
| 7  | 83502185 | 83510701 | NM_023377    | chr7  | 83503591 | 83504237 |
| 6  | 83490638 | 83507890 | NM_009610    | chr6  | 83502635 | 83503575 |
| 7  | 83455112 | 83463615 | NM_177695    | chr7  | 83461872 | 83462590 |
| 9  | 83339048 | 83347547 | NM_172507    | chr9  | 83340421 | 83341063 |
| 14 | 83247590 | 83256197 | NM_001013753 | chr14 | 83251028 | 83251796 |
| 11 | 83219512 | 83228766 | NM_001013386 | chr11 | 83223836 | 83224468 |
| 2  | 83152297 | 83160796 | BC009100     | chr2  | 83158717 | 83159306 |
| 2  | 83152297 | 83160796 | BC009100     | chr2  | 83153899 | 83154751 |
| 18 | 83130598 | 83139097 | BC023380     | chr18 | 83135099 | 83135799 |
| 3  | 83106081 | 83121129 | NM_010196    | chr3  | 83112642 | 83113498 |
| 1  | 83032786 | 83041285 | NM_027725    | chr1  | 83033629 | 83034329 |
| 11 | 82985381 | 82995297 | NM_011410    | chr11 | 82988840 | 82989592 |
| 9  | 82940744 | 82949323 | NM_175074    | chr9  | 82947257 | 82947859 |
| 11 | 82927040 | 82935543 | NM_011407    | chr11 | 82930288 | 82931470 |
| 9  | 82769627 | 82778126 | AB049460     | chr9  | 82776979 | 82777762 |
| 11 | 82762297 | 82773437 | NM_183201    | chr11 | 82766054 | 82766670 |
| 15 | 82619501 | 82628011 | NM_029562    | chr15 | 82620803 | 82621432 |
| 15 | 82515325 | 82524265 | BC059104     | chr15 | 82517070 | 82517660 |
| 1  | 82463317 | 82471816 | NM_007735    | chr1  | 82470457 | 82471106 |
| 4  | 82322848 | 82336738 | NM_026647    | chr4  | 82332531 | 82333037 |
| 12 | 82249017 | 82258028 | NM_080440    | chr12 | 82255676 | 82256371 |
| 13 | 82107961 | 82116481 | NM_054053    | chr13 | 82108106 | 82109136 |
| 13 | 82045478 | 82053977 | AF405693     | chr13 | 82052004 | 82052734 |
| 7  | 81863260 | 81871759 | NM_007562    | chr7  | 81863794 | 81864398 |
| 11 | 81782092 | 81790604 | NM_001034013 | chr11 | 81787476 | 81788117 |
| 4  | 81761512 | 81770011 | BC096542     | chr4  | 81764209 | 81765006 |
| 15 | 81287571 | 81296124 | NM_019712    | chr15 | 81291250 | 81291836 |
| 15 | 81056824 | 81065528 | NM_145132    | chr15 | 81057741 | 81058339 |
| 11 | 80966497 | 80975098 | NM_007384    | chr11 | 80971030 | 80971558 |
| 15 | 80393849 | 80402348 | BC052496     | chr15 | 80395542 | 80396254 |
| 8  | 80344498 | 80352997 | AF297029     | chr8  | 80345579 | 80346167 |
| 10 | 80191534 | 80210876 | NM_013651    | chr10 | 80210375 | 80210828 |

|    |          |          |              |       |          |          |
|----|----------|----------|--------------|-------|----------|----------|
| 17 | 80192538 | 80205340 | NM_194269    | chr17 | 80199522 | 80200386 |
| 17 | 80195965 | 80204802 | NM_198942    | chr17 | 80199522 | 80200386 |
| 1  | 80090469 | 80098968 | NM_173425    | chr1  | 80094026 | 80094931 |
| 2  | 79927279 | 79936314 | NM_016744    | chr2  | 79932968 | 79933584 |
| 11 | 79803301 | 79811800 | NM_199196    | chr11 | 79808801 | 79809289 |
| 3  | 79712125 | 79720647 | NM_025794    | chr3  | 79718634 | 79719292 |
| 10 | 79564970 | 79585370 | NM_007909    | chr10 | 79574707 | 79575391 |
| 2  | 79439450 | 79447949 | BC008560     | chr2  | 79442227 | 79442827 |
| 16 | 78807540 | 78816368 | NM_139134    | chr16 | 78810848 | 78811919 |
| 11 | 78798527 | 78807046 | NM_010708    | chr11 | 78805716 | 78806668 |
| 17 | 78785072 | 78793630 | NM_011163    | chr17 | 78786530 | 78787127 |
| 11 | 78730982 | 78740914 | NM_010927    | chr11 | 78734672 | 78735343 |
| 15 | 78698445 | 78706944 | NM_145929    | chr15 | 78700844 | 78701633 |
| 13 | 78659632 | 78669332 | NM_010151    | chr13 | 78666789 | 78667560 |
| 14 | 78502889 | 78511455 | NM_021543    | chr14 | 78505902 | 78506539 |
| 14 | 78393725 | 78402325 | NM_010701    | chr14 | 78398374 | 78398987 |
| 10 | 78366727 | 78375226 | NM_147042    | chr10 | 78373080 | 78373965 |
| 10 | 78366727 | 78375226 | NM_147042    | chr10 | 78370697 | 78371285 |
| 18 | 78366017 | 78374516 | AF258601     | chr18 | 78366017 | 78366700 |
| 11 | 78344044 | 78358389 | NM_009395    | chr11 | 78355509 | 78356109 |
| 6  | 78349492 | 78358293 | NM_009042    | chr6  | 78354487 | 78355076 |
| 18 | 78338711 | 78347210 | AF367359     | chr18 | 78343342 | 78344536 |
| 6  | 78328664 | 78337180 | NM_009043    | chr6  | 78333898 | 78335033 |
| 6  | 78304218 | 78312768 | NM_011259    | chr6  | 78312453 | 78313393 |
| 6  | 78305855 | 78314374 | NM_013893    | chr6  | 78312453 | 78313393 |
| 6  | 78294394 | 78302910 | NM_011036    | chr6  | 78300694 | 78301287 |
| 12 | 78244763 | 78253262 | AB025198     | chr12 | 78248360 | 78249025 |
| 11 | 78134393 | 78147116 | NM_201406    | chr11 | 78144273 | 78144994 |
| 9  | 78107714 | 78116237 | NM_205822    | chr9  | 78110572 | 78111341 |
| 1  | 78077455 | 78086283 | NM_008781    | chr1  | 78085005 | 78085878 |
| 11 | 77979223 | 77987722 | NM_009423    | chr11 | 77981621 | 77982289 |
| 8  | 77883774 | 77892274 | NM_178017    | chr8  | 77890622 | 77891545 |
| 11 | 77707482 | 77716028 | NM_008952    | chr11 | 77714738 | 77715073 |
| 5  | 77598098 | 77606688 | NM_027270    | chr5  | 77604000 | 77604640 |
| 14 | 77360930 | 77369429 | BC127173     | chr14 | 77366729 | 77367646 |
| 10 | 77226563 | 77241542 | NM_145855    | chr10 | 77231666 | 77232297 |
| 10 | 77227667 | 77236166 | BC115499     | chr10 | 77231666 | 77232297 |
| 5  | 77209052 | 77217575 | NM_020611    | chr5  | 77213751 | 77214492 |
| 10 | 77144360 | 77172719 | NM_010670    | chr10 | 77163614 | 77164274 |
| 10 | 77144360 | 77172719 | NM_010670    | chr10 | 77151862 | 77152578 |
| 9  | 77131272 | 77139771 | BC089626     | chr9  | 77137807 | 77138417 |
| 10 | 76859444 | 76867989 | NM_001024840 | chr10 | 76862654 | 76863330 |
| 14 | 76820630 | 76829162 | NM_177629    | chr14 | 76822555 | 76823450 |
| 14 | 76820630 | 76829162 | NM_177629    | chr14 | 76820886 | 76821471 |
| 13 | 76520479 | 76528998 | NM_175495    | chr13 | 76528208 | 76528810 |
| 13 | 76482065 | 76490672 | NM_178916    | chr13 | 76483475 | 76484301 |
| 2  | 76470134 | 76478860 | NM_031256    | chr2  | 76472997 | 76473597 |

|   |    |          |                       |       |          |          |
|---|----|----------|-----------------------|-------|----------|----------|
|   | 2  | 76471395 | 76479909 NM_010222    | chr2  | 76472997 | 76473597 |
|   | 2  | 76445112 | 76453611 DQ365828     | chr2  | 76450506 | 76451110 |
|   | 13 | 76299912 | 76308421 NM_053108    | chr13 | 76307819 | 76308353 |
|   | 18 | 76178823 | 76187322 BC018187     | chr18 | 76185873 | 76186496 |
|   | 2  | 76158788 | 76167288 NM_009989    | chr2  | 76160259 | 76160861 |
|   | 3  | 76154514 | 76163024 NM_178673    | chr3  | 76155170 | 76155886 |
|   | 14 | 76108801 | 76117300 BC052062     | chr14 | 76108831 | 76109507 |
|   | 12 | 76093018 | 76102172 NM_172805    | chr12 | 76096637 | 76097275 |
|   | 10 | 76013383 | 76021901 NM_080845    | chr10 | 76016692 | 76017281 |
| X |    | 75885786 | 75900491 BC050207     | chrX  | 75888986 | 75889342 |
|   | 15 | 75683582 | 75692140 NM_026960    | chr15 | 75686924 | 75687634 |
|   | 10 | 75552235 | 75563581 NM_023219    | chr10 | 75552644 | 75552986 |
|   | 10 | 75470399 | 75478941 NM_177475    | chr10 | 75476617 | 75477327 |
|   | 9  | 75467425 | 75475926 NM_009130    | chr9  | 75473660 | 75474682 |
|   | 3  | 75351425 | 75362004 NM_026460    | chr3  | 75354307 | 75354912 |
|   | 5  | 75323634 | 75332323 NM_028850    | chr5  | 75328210 | 75328751 |
|   | 11 | 75296972 | 75305784 NM_138659    | chr11 | 75302899 | 75303515 |
|   | 13 | 75271424 | 75280762 NM_009817    | chr13 | 75272836 | 75273827 |
|   | 10 | 75239737 | 75248300 NM_008185    | chr10 | 75247574 | 75248178 |
|   | 13 | 75099875 | 75114674 NM_030711    | chr13 | 75111178 | 75112586 |
|   | 12 | 75097950 | 75106449 BC056932     | chr12 | 75098117 | 75098712 |
|   | 9  | 75091286 | 75102650 NM_138719    | chr9  | 75095175 | 75095826 |
|   | 12 | 75075055 | 75083554 AB102950     | chr12 | 75077114 | 75077873 |
|   | 1  | 75069282 | 75077969 NM_026187    | chr1  | 75076469 | 75077189 |
|   | 1  | 75072603 | 75081343 NM_001003917 | chr1  | 75076469 | 75077189 |
|   | 2  | 74990189 | 74998689 BC092050     | chr2  | 74991751 | 74992355 |
|   | 5  | 74982084 | 74990593 AF034745     | chr5  | 74989474 | 74990105 |
|   | 1  | 74882359 | 74891050 NM_010544    | chr1  | 74890603 | 74891004 |
|   | 1  | 74816127 | 74839928 NM_153111    | chr1  | 74839807 | 74840507 |
|   | 15 | 74808108 | 74816685 NM_020498    | chr15 | 74811808 | 74812892 |
|   | 1  | 74718723 | 74727725 NM_009518    | chr1  | 74719906 | 74720573 |
|   | 15 | 74706443 | 74714959 NM_025929    | chr15 | 74707181 | 74707948 |
|   | 8  | 74648350 | 74656849 NM_028715    | chr8  | 74651651 | 74652586 |
|   | 15 | 74624289 | 74633223 NM_029627    | chr15 | 74632609 | 74633080 |
| X |    | 74616362 | 74624861 BC116859     | chrX  | 74622198 | 74622921 |
|   | 15 | 74603580 | 74612114 NM_172433    | chr15 | 74604402 | 74605076 |
|   | 15 | 74530416 | 74550988 NM_198607    | chr15 | 74536422 | 74537102 |
|   | 15 | 74532218 | 74542552 NM_008415    | chr15 | 74536422 | 74537102 |
|   | 14 | 74518618 | 74527192 NM_026232    | chr14 | 74524844 | 74525441 |
|   | 13 | 74423864 | 74432363 NM_027704    | chr13 | 74431491 | 74432150 |
|   | 13 | 74141502 | 74150024 NM_001040692 | chr13 | 74149084 | 74149675 |
|   | 13 | 74141502 | 74150024 NM_001040692 | chr13 | 74144117 | 74145260 |
|   | 11 | 74098843 | 74107342 NM_011002    | chr11 | 74101072 | 74101930 |
|   | 11 | 74098843 | 74107342 NM_011002    | chr11 | 74099687 | 74100288 |
|   | 1  | 74081201 | 74089727 NM_009909    | chr1  | 74088205 | 74088823 |
|   | 11 | 74020985 | 74029484 NM_146711    | chr11 | 74025979 | 74026940 |
|   | 11 | 74020985 | 74029484 NM_146711    | chr11 | 74023033 | 74023893 |

|    |          |          |              |       |          |          |
|----|----------|----------|--------------|-------|----------|----------|
| 11 | 74005700 | 74014199 | NM_207622    | chr11 | 74010779 | 74011603 |
| 14 | 73970442 | 73978995 | NM_019775    | chr14 | 73978464 | 73979220 |
| 11 | 73965310 | 73973809 | NM_146708    | chr11 | 73973274 | 73973812 |
| 5  | 73924367 | 73932879 | NM_011890    | chr5  | 73924965 | 73925571 |
| 18 | 73877319 | 73885848 | NM_053255    | chr18 | 73880713 | 73881318 |
| 11 | 73868474 | 73876973 | NM_147004    | chr11 | 73873199 | 73873815 |
| 11 | 73868474 | 73876973 | NM_147004    | chr11 | 73869275 | 73869937 |
| 5  | 73830404 | 73838903 | BC031793     | chr5  | 73834005 | 73835015 |
| 9  | 73726129 | 73736699 | BC030416     | chr9  | 73729161 | 73729950 |
| 11 | 73702066 | 73710565 | NM_147007    | chr11 | 73703228 | 73703846 |
| 11 | 73661819 | 73670318 | NM_147008    | chr11 | 73662676 | 73663657 |
| 11 | 73597135 | 73605634 | NM_146347    | chr11 | 73603464 | 73604083 |
| 2  | 73573438 | 73581937 | BC054770     | chr2  | 73576764 | 73577661 |
| 11 | 73412777 | 73421276 | NM_207224    | chr11 | 73415961 | 73416693 |
| 8  | 73402388 | 73411934 | NM_178771    | chr8  | 73410129 | 73410742 |
| 11 | 73403432 | 73411931 | NM_147023    | chr11 | 73404741 | 73405369 |
| 11 | 73330893 | 73339392 | NM_146443    | chr11 | 73332124 | 73333130 |
| 5  | 73323637 | 73332136 | BC043713     | chr5  | 73325099 | 73325847 |
| 11 | 73239677 | 73256419 | NM_147024    | chr11 | 73249324 | 73250160 |
| 11 | 73202726 | 73218215 | NM_146921    | chr11 | 73212137 | 73212845 |
| 11 | 73184946 | 73193445 | NM_146922    | chr11 | 73190347 | 73191154 |
| 3  | 73140370 | 73148869 | NM_198864    | chr3  | 73145486 | 73146459 |
| 5  | 73029377 | 73037912 | U16145       | chr5  | 73036863 | 73037842 |
| 1  | 72946600 | 72955106 | NM_009407    | chr1  | 72950178 | 72950813 |
| 5  | 72914478 | 72927887 | NM_007723    | chr5  | 72926432 | 72927036 |
| 5  | 72920931 | 72929493 | BC125449     | chr5  | 72926432 | 72927036 |
| 5  | 72857714 | 72872685 | NM_001024147 | chr5  | 72870458 | 72871334 |
| 5  | 72857714 | 72872685 | NM_001024147 | chr5  | 72858692 | 72859065 |
| 5  | 72793932 | 72809364 | BC022652     | chr5  | 72797213 | 72797933 |
| 1  | 72751699 | 72760213 | NM_008342    | chr1  | 72754382 | 72754926 |
| 8  | 72545879 | 72560537 | NM_172754    | chr8  | 72553804 | 72554412 |
| 1  | 72467273 | 72476138 | NM_001045533 | chr1  | 72471812 | 72472451 |
| 13 | 72426980 | 72435479 | NM_010573    | chr13 | 72433735 | 72434568 |
| 8  | 72067443 | 72075942 | NM_199364    | chr8  | 72071326 | 72072358 |
| 10 | 72044189 | 72052694 | NM_025635    | chr10 | 72046761 | 72047441 |
| 12 | 71928435 | 71937184 | AY116674     | chr12 | 71934185 | 71935321 |
| 17 | 71612129 | 71620628 | NM_177087    | chr17 | 71619503 | 71620194 |
| 6  | 71467363 | 71475941 | NM_025783    | chr6  | 71473811 | 71474499 |
| 14 | 71442586 | 71451085 | NM_207636    | chr14 | 71446291 | 71447160 |
| 17 | 71329882 | 71338381 | NM_028887    | chr17 | 71331545 | 71332099 |
| 2  | 71324284 | 71332925 | NM_010053    | chr2  | 71324499 | 71325153 |
| 6  | 71249243 | 71257742 | U76371       | chr6  | 71255467 | 71256061 |
| 6  | 71207540 | 71216039 | BC005704     | chr6  | 71212450 | 71213119 |
| 9  | 71008382 | 71016908 | NM_009022    | chr9  | 71011555 | 71012497 |
| 17 | 70892856 | 70913390 | NM_026064    | chr17 | 70908267 | 70908977 |
| 11 | 70847151 | 70855708 | NM_134022    | chr11 | 70854788 | 70855660 |
| 12 | 70846998 | 70855497 | BC057068     | chr12 | 70853997 | 70854639 |

|   |    |          |          |              |       |          |          |
|---|----|----------|----------|--------------|-------|----------|----------|
|   | 1  | 70652923 | 70661422 | NM_177164    | chr1  | 70656554 | 70657156 |
| X |    | 70529470 | 70568289 | NM_177234    | chrX  | 70566946 | 70567553 |
| X |    | 70529470 | 70568289 | NM_177234    | chrX  | 70555405 | 70555992 |
|   | 2  | 70482652 | 70491151 | BC007468     | chr2  | 70483939 | 70484722 |
| X |    | 70374184 | 70382713 | NM_008106    | chrX  | 70378989 | 70379697 |
|   | 2  | 70357003 | 70365552 | NM_008077    | chr2  | 70363851 | 70364484 |
|   | 11 | 70328312 | 70336811 | NM_001013607 | chr11 | 70328996 | 70329735 |
|   | 11 | 70329391 | 70344130 | NM_146020    | chr11 | 70328996 | 70329735 |
|   | 11 | 70165713 | 70174212 | NM_009660    | chr11 | 70172737 | 70173825 |
|   | 6  | 70139262 | 70147761 | BC094049     | chr6  | 70144834 | 70145431 |
|   | 1  | 69754186 | 69762695 | NM_029160    | chr1  | 69758509 | 69759419 |
|   | 3  | 69684291 | 69692790 | NM_020026    | chr3  | 69691273 | 69691999 |
|   | 11 | 69632136 | 69657044 | NM_198862    | chr11 | 69641970 | 69642917 |
|   | 14 | 69619210 | 69628107 | NM_008115    | chr14 | 69622960 | 69623828 |
|   | 5  | 69617996 | 69626844 | NM_175519    | chr5  | 69619787 | 69620497 |
|   | 18 | 69463890 | 69475153 | NM_013685    | chr18 | 69465281 | 69466162 |
| X |    | 69438936 | 69447441 | BC064787     | chrX  | 69446489 | 69447087 |
| X |    | 69438936 | 69447441 | BC064787     | chrX  | 69444066 | 69444922 |
|   | 8  | 69434745 | 69443244 | NM_028927    | chr8  | 69441077 | 69441873 |
| X |    | 69399671 | 69408170 | NM_001025384 | chrX  | 69404542 | 69405158 |
|   | 17 | 69282880 | 69292843 | NM_009547    | chr17 | 69284577 | 69285173 |
|   | 14 | 69252769 | 69265156 | NM_009755    | chr14 | 69262224 | 69263270 |
|   | 14 | 69259919 | 69268541 | NM_145219    | chr14 | 69262224 | 69263270 |
|   | 9  | 69191139 | 69199661 | NM_145618    | chr9  | 69196926 | 69197542 |
|   | 2  | 69175301 | 69183839 | NM_175512    | chr2  | 69177069 | 69177538 |
| X |    | 69165241 | 69173881 | NM_010941    | chrX  | 69167864 | 69168818 |
| X |    | 69167073 | 69177064 | NM_019405    | chrX  | 69167864 | 69168818 |
|   | 11 | 69134175 | 69145026 | NM_010599    | chr11 | 69144524 | 69145210 |
|   | 11 | 69135631 | 69145970 | NM_172560    | chr11 | 69144524 | 69145210 |
| X |    | 69116087 | 69124586 | NM_181855    | chrX  | 69120235 | 69121217 |
|   | 17 | 69106784 | 69115283 | AF177146     | chr17 | 69108714 | 69109385 |
|   | 17 | 69055712 | 69064211 | NM_013813    | chr17 | 69057834 | 69058448 |
|   | 10 | 68923065 | 68932064 | NM_146005    | chr10 | 68926271 | 68926903 |
| X |    | 68906265 | 68914906 | NM_008067    | chrX  | 68909196 | 68909796 |
|   | 7  | 68620202 | 68628751 | NM_001042592 | chr7  | 68622284 | 68623404 |
|   | 8  | 68541514 | 68550013 | NM_175188    | chr8  | 68546142 | 68546744 |
|   | 4  | 68438211 | 68446758 | NM_019967    | chr4  | 68438497 | 68439253 |
|   | 13 | 67980823 | 67989322 | NM_001076791 | chr13 | 67984760 | 67985240 |
|   | 17 | 67906504 | 67915043 | NM_172964    | chr17 | 67912198 | 67912847 |
|   | 13 | 67803010 | 67811509 | NM_001003666 | chr13 | 67808114 | 67808814 |
|   | 13 | 67660903 | 67674803 | NM_001013769 | chr13 | 67669983 | 67670578 |
|   | 7  | 67602721 | 67611220 | BC047212     | chr7  | 67610648 | 67611200 |
|   | 18 | 67462973 | 67471605 | NM_007702    | chr18 | 67467267 | 67468017 |
|   | 13 | 67303803 | 67312323 | BC089319     | chr13 | 67305203 | 67306872 |
|   | 17 | 67256519 | 67265402 | NM_008984    | chr17 | 67260048 | 67260648 |
|   | 7  | 67249270 | 67257808 | NM_001033713 | chr7  | 67255205 | 67255854 |
|   | 7  | 67249270 | 67257808 | NM_001033713 | chr7  | 67250601 | 67251214 |

|   |    |          |                       |       |          |          |
|---|----|----------|-----------------------|-------|----------|----------|
|   | 9  | 67172480 | 67180979 BC079896     | chr9  | 67176395 | 67176982 |
|   | 11 | 67068845 | 67077344 BC052786     | chr11 | 67076560 | 67077323 |
|   | 1  | 67050274 | 67058773 BC126969     | chr1  | 67054740 | 67055349 |
|   | 11 | 67048224 | 67056723 NM_010855    | chr11 | 67054218 | 67054880 |
|   | 14 | 67031214 | 67039788 NM_010910    | chr14 | 67033670 | 67034277 |
|   | 11 | 66981261 | 66989914 NM_001039545 | chr11 | 66984662 | 66985266 |
|   | 11 | 66866266 | 66874789 NM_025510    | chr11 | 66867106 | 66867700 |
|   | 14 | 66715790 | 66724289 BC016533     | chr14 | 66722244 | 66723759 |
|   | 15 | 66628679 | 66637178 U29056       | chr15 | 66629510 | 66630198 |
| X |    | 66623041 | 66631640 NM_010498    | chrX  | 66625330 | 66626432 |
|   | 9  | 66506886 | 66515385 NM_178396    | chr9  | 66507517 | 66507981 |
|   | 3  | 66221855 | 66230367 NM_028357    | chr3  | 66222840 | 66224035 |
|   | 12 | 65915278 | 65923777 BC062107     | chr12 | 65921669 | 65922293 |
|   | 17 | 65713688 | 65722187 NM_146081    | chr17 | 65719904 | 65720700 |
| X |    | 65614996 | 65623495 NM_008032    | chrX  | 65622904 | 65623441 |
|   | 14 | 65292483 | 65300984 NM_019675    | chr14 | 65295712 | 65296771 |
|   | 7  | 65247690 | 65256189 NM_009386    | chr7  | 65254530 | 65255219 |
|   | 3  | 65190943 | 65200071 NM_010597    | chr3  | 65195713 | 65196323 |
|   | 16 | 65045557 | 65054056 NM_008310    | chr16 | 65049454 | 65050240 |
|   | 16 | 65045557 | 65054056 NM_008310    | chr16 | 65046340 | 65047267 |
|   | 8  | 65012708 | 65021235 NM_011922    | chr8  | 65019494 | 65020051 |
|   | 14 | 64889922 | 64898421 BC051636     | chr14 | 64891646 | 64892252 |
|   | 7  | 64749416 | 64757990 NM_023239    | chr7  | 64755220 | 64755911 |
|   | 16 | 64726024 | 64734523 NM_028059    | chr16 | 64727880 | 64728565 |
|   | 6  | 64652703 | 64661234 NM_007500    | chr6  | 64660698 | 64661214 |
|   | 18 | 64572559 | 64581058 NM_007444    | chr18 | 64573929 | 64574580 |
|   | 7  | 64374656 | 64383155 NM_007461    | chr7  | 64375023 | 64375642 |
|   | 14 | 64214765 | 64223352 NM_015795    | chr14 | 64222598 | 64223290 |
|   | 3  | 64163571 | 64172070 NM_019918    | chr3  | 64169017 | 64169678 |
|   | 8  | 64110313 | 64118913 NM_021506    | chr8  | 64113247 | 64113864 |
|   | 5  | 64085499 | 64093998 NM_029554    | chr5  | 64086677 | 64087509 |
|   | 3  | 64049740 | 64058662 NM_015728    | chr3  | 64054637 | 64055026 |
|   | 4  | 63530678 | 63539177 D90343       | chr4  | 63534419 | 63535227 |
|   | 7  | 63317722 | 63326221 NM_130880    | chr7  | 63324441 | 63325242 |
|   | 18 | 63072459 | 63080958 AB023957     | chr18 | 63076090 | 63076692 |
|   | 14 | 62978720 | 62987219 BC031365     | chr14 | 62980268 | 62980736 |
|   | 14 | 62970000 | 62978520 AY168340     | chr14 | 62974925 | 62975580 |
|   | 14 | 62939391 | 62947900 NM_026359    | chr14 | 62947288 | 62947858 |
|   | 10 | 62846868 | 62855367 AF344871     | chr10 | 62854033 | 62854916 |
|   | 4  | 62695773 | 62704272 NM_025685    | chr4  | 62699284 | 62700216 |
|   | 9  | 62630793 | 62639292 NM_001033175 | chr9  | 62638629 | 62639381 |
|   | 11 | 62597462 | 62611612 NM_138949    | chr11 | 62603406 | 62604205 |
|   | 17 | 62564107 | 62572779 NM_207654    | chr17 | 62571154 | 62571766 |
|   | 11 | 62542514 | 62551288 NM_133208    | chr11 | 62543957 | 62544570 |
|   | 14 | 62495564 | 62504078 NM_177594    | chr14 | 62499475 | 62500060 |
|   | 2  | 62444493 | 62452999 NM_027835    | chr2  | 62449643 | 62450231 |
|   | 18 | 62443573 | 62452072 NM_008313    | chr18 | 62447866 | 62448912 |

|    |          |          |              |       |          |          |
|----|----------|----------|--------------|-------|----------|----------|
| 7  | 62340961 | 62349460 | NM_013788    | chr7  | 62342892 | 62343580 |
| 15 | 62046570 | 62055069 | NM_026230    | chr15 | 62053884 | 62054507 |
| 9  | 61866347 | 61874846 | NM_033320    | chr9  | 61866363 | 61867010 |
| 18 | 61849190 | 61857700 | NM_021296    | chr18 | 61855561 | 61856321 |
| 11 | 61494286 | 61503155 | NM_178618    | chr11 | 61500263 | 61500971 |
| 13 | 61210516 | 61219033 | NM_021445    | chr13 | 61213015 | 61213633 |
| 13 | 61011688 | 61021548 | NM_012007    | chr13 | 61020756 | 61021375 |
| 13 | 61011688 | 61021548 | NM_012007    | chr13 | 61017990 | 61018586 |
| 13 | 61011688 | 61021548 | NM_012007    | chr13 | 61012541 | 61013302 |
| 4  | 61003341 | 61011840 | BC037152     | chr4  | 61004741 | 61005818 |
| 4  | 61003341 | 61011840 | BC037152     | chr4  | 61003358 | 61004195 |
| 13 | 60943675 | 60957558 | NM_009411    | chr13 | 60954541 | 60955137 |
| 13 | 60943675 | 60957558 | NM_009411    | chr13 | 60951672 | 60952009 |
| 10 | 60865190 | 60873689 | NM_153542    | chr10 | 60866343 | 60866940 |
| 13 | 60809968 | 60818467 | NM_027344    | chr13 | 60812622 | 60813287 |
| 13 | 60809968 | 60818467 | NM_027344    | chr13 | 60808827 | 60809982 |
| 2  | 60679810 | 60688309 | BC057866     | chr2  | 60679862 | 60680471 |
| 4  | 60634199 | 60642721 | BC099597     | chr4  | 60634238 | 60634953 |
| 13 | 60605570 | 60614333 | NM_029653    | chr13 | 60606365 | 60607131 |
| X  | 60535027 | 60543661 | NM_178740    | chrX  | 60535197 | 60535992 |
| 19 | 60520400 | 60528967 | NM_201615    | chr19 | 60525347 | 60525948 |
| 2  | 60472001 | 60482905 | NM_021359    | chr2  | 60480799 | 60481599 |
| 8  | 60398018 | 60406586 | NM_008252    | chr8  | 60403199 | 60403894 |
| 4  | 60231412 | 60239951 | NM_008647    | chr4  | 60232879 | 60233580 |
| 8  | 60207125 | 60216545 | NM_010402    | chr8  | 60207417 | 60208273 |
| 13 | 60184391 | 60192988 | NM_008086    | chr13 | 60187912 | 60188896 |
| 4  | 60161900 | 60170419 | BC100586     | chr4  | 60163485 | 60164796 |
| 2  | 60082758 | 60091257 | NM_025422    | chr2  | 60088958 | 60089547 |
| 2  | 60070539 | 60079038 | BC005501     | chr2  | 60074693 | 60075309 |
| 14 | 59989502 | 60006600 | NM_013869    | chr14 | 60000125 | 60000944 |
| 16 | 59495509 | 59504008 | NM_174848    | chr16 | 59495773 | 59496375 |
| 9  | 59381358 | 59389857 | BC057083     | chr9  | 59386166 | 59386784 |
| 9  | 59370343 | 59378842 | NM_175235    | chr9  | 59371968 | 59373061 |
| 9  | 59331673 | 59340203 | NM_010421    | chr9  | 59335975 | 59336446 |
| 3  | 59296309 | 59304811 | NM_028808    | chr3  | 59303857 | 59304727 |
| 16 | 59301973 | 59310472 | NM_001011792 | chr16 | 59303734 | 59304462 |
| 16 | 59301973 | 59310472 | NM_001011792 | chr16 | 59302707 | 59303359 |
| 3  | 59265544 | 59274043 | NM_032399    | chr3  | 59271181 | 59271913 |
| 3  | 59265544 | 59274043 | NM_032399    | chr3  | 59266652 | 59267563 |
| 16 | 59224252 | 59232751 | NM_146995    | chr16 | 59225749 | 59227033 |
| 18 | 59181878 | 59190401 | NM_173759    | chr18 | 59186174 | 59187143 |
| 12 | 59184401 | 59193197 | NM_025809    | chr12 | 59183906 | 59184804 |
| 4  | 59078615 | 59087132 | NM_025968    | chr4  | 59082020 | 59082772 |
| 16 | 58976511 | 58985013 | NM_146322    | chr16 | 58979737 | 58980832 |
| 16 | 58976511 | 58985013 | NM_146322    | chr16 | 58977660 | 58978277 |
| 1  | 58912117 | 58920849 | NM_172656    | chr1  | 58917834 | 58918819 |
| 19 | 58845165 | 58853664 | NM_026208    | chr19 | 58846511 | 58847126 |

|    |          |                       |       |          |          |
|----|----------|-----------------------|-------|----------|----------|
| 11 | 58752595 | 58761094 BC072613     | chr11 | 58760924 | 58761830 |
| 11 | 58759106 | 58773412 NM_178218    | chr11 | 58760924 | 58761830 |
| 19 | 58717615 | 58726114 NM_026925    | chr19 | 58724377 | 58725012 |
| 16 | 58658768 | 58667267 BC119518     | chr16 | 58661681 | 58662301 |
| 11 | 58641351 | 58649850 NM_001011819 | chr11 | 58645889 | 58646480 |
| 11 | 58627123 | 58635622 NM_146536    | chr11 | 58632003 | 58632854 |
| 6  | 58520249 | 58528749 NM_011920    | chr6  | 58523873 | 58525869 |
| 19 | 58505217 | 58514609 NM_010279    | chr19 | 58511536 | 58512282 |
| 1  | 58446966 | 58455473 NM_008765    | chr1  | 58451844 | 58452808 |
| 11 | 58439740 | 58448239 NM_146376    | chr11 | 58445664 | 58446543 |
| 11 | 58427166 | 58435665 NM_144544    | chr11 | 58427864 | 58428781 |
| 4  | 58374014 | 58382621 NM_001037127 | chr4  | 58376583 | 58377195 |
| 11 | 58365933 | 58374432 NM_146502    | chr11 | 58368061 | 58368761 |
| 6  | 58362924 | 58371423 NM_134177    | chr6  | 58364710 | 58365407 |
| 13 | 58361985 | 58370485 NM_175214    | chr13 | 58364245 | 58364923 |
| 11 | 58357152 | 58365669 NM_001011531 | chr11 | 58363229 | 58364284 |
| 16 | 58344986 | 58353577 NM_028523    | chr16 | 58345392 | 58345741 |
| 9  | 58280740 | 58290244 NM_176921    | chr9  | 58288359 | 58289210 |
| 15 | 58254074 | 58262573 BC033609     | chr15 | 58254275 | 58254864 |
| 6  | 58230875 | 58239374 NM_053232    | chr6  | 58232348 | 58233508 |
| 3  | 58189720 | 58198219 BC083355     | chr3  | 58190496 | 58191148 |
| 9  | 58166073 | 58174592 BC100468     | chr9  | 58169197 | 58169855 |
| 2  | 58137694 | 58146193 NM_001033369 | chr2  | 58141373 | 58141963 |
| X  | 58040039 | 58048538 BC010759     | chrX  | 58046215 | 58047042 |
| 6  | 57906381 | 57914880 NM_053238    | chr6  | 57910736 | 57911378 |
| 5  | 57890614 | 57899232 BC008259     | chr5  | 57895473 | 57896327 |
| 2  | 57865617 | 57874227 NM_029972    | chr2  | 57867494 | 57868567 |
| 6  | 57853870 | 57862369 NM_134179    | chr6  | 57861640 | 57862284 |
| 6  | 57853870 | 57862369 NM_134179    | chr6  | 57860348 | 57860947 |
| 19 | 57700223 | 57708722 BC050020     | chr19 | 57700652 | 57701430 |
| 10 | 57616384 | 57638017 NM_001034869 | chr10 | 57629229 | 57630536 |
| 10 | 57616384 | 57638017 NM_001034869 | chr10 | 57625214 | 57625810 |
| 10 | 57616384 | 57638017 NM_001034869 | chr10 | 57624421 | 57624843 |
| 10 | 57616384 | 57638017 NM_001034869 | chr10 | 57621656 | 57622995 |
| 10 | 57616384 | 57638017 NM_001034869 | chr10 | 57616800 | 57618034 |
| 9  | 57479273 | 57487792 NM_009993    | chr9  | 57484633 | 57485281 |
| 10 | 57467338 | 57475854 NM_021272    | chr10 | 57467722 | 57468393 |
| 9  | 57353091 | 57361626 NM_022813    | chr9  | 57355103 | 57355938 |
| 6  | 57327944 | 57336443 NM_134182    | chr6  | 57334336 | 57334944 |
| 6  | 57133436 | 57141935 NM_053235    | chr6  | 57137682 | 57138167 |
| 15 | 57092745 | 57101244 BC026439     | chr15 | 57095970 | 57096574 |
| 16 | 57086181 | 57094691 NM_023175    | chr16 | 57094175 | 57094667 |
| 4  | 57038979 | 57047478 NM_175518    | chr4  | 57046361 | 57047013 |
| 6  | 56994520 | 57003019 NM_134185    | chr6  | 56999629 | 57000427 |
| 6  | 56925878 | 56934377 NM_134175    | chr6  | 56931999 | 56933001 |
| 19 | 56921666 | 56930216 NM_172840    | chr19 | 56926640 | 56927255 |
| 19 | 56888558 | 56897057 NM_031387    | chr19 | 56890750 | 56891369 |



|    |          |          |              |       |          |          |
|----|----------|----------|--------------|-------|----------|----------|
| 6  | 56880091 | 56888590 | NM_134176    | chr6  | 56886270 | 56886988 |
| 11 | 56849379 | 56857878 | NM_008165    | chr11 | 56857057 | 56857860 |
| 4  | 56828061 | 56840008 | NM_009611    | chr4  | 56835759 | 56836903 |
| 4  | 56832932 | 56841450 | NM_025271    | chr4  | 56835759 | 56836903 |
| 17 | 56761264 | 56769763 | NM_153551    | chr17 | 56762835 | 56763729 |
| 14 | 56685911 | 56694459 | AB023958     | chr14 | 56687195 | 56687835 |
| 19 | 56595511 | 56604066 | NM_025811    | chr19 | 56598826 | 56599415 |
| 19 | 56597906 | 56607472 | NM_018831    | chr19 | 56598826 | 56599415 |
| 8  | 56447541 | 56456414 | NM_153581    | chr8  | 56454437 | 56455348 |
| 8  | 56447541 | 56456414 | NM_153581    | chr8  | 56451255 | 56451985 |
| 17 | 56443902 | 56452407 | NM_144858    | chr17 | 56444015 | 56444636 |
| 17 | 56143625 | 56152191 | NM_011483    | chr17 | 56150485 | 56151085 |
| 8  | 56144628 | 56153127 | BC042703     | chr8  | 56149682 | 56150105 |
| 8  | 56026161 | 56034680 | BC054817     | chr8  | 56027571 | 56028178 |
| 9  | 55956506 | 55965185 | NM_019793    | chr9  | 55958670 | 55959196 |
| 17 | 55919087 | 55930220 | NM_025836    | chr17 | 55924770 | 55925395 |
| 6  | 55608135 | 55616647 | NM_009717    | chr6  | 55613379 | 55614044 |
| 13 | 55577092 | 55586742 | NM_145382    | chr13 | 55577724 | 55578681 |
| 13 | 55520540 | 55529060 | NM_026131    | chr13 | 55521863 | 55522551 |
| 13 | 55433903 | 55442415 | NM_021489    | chr13 | 55437896 | 55438493 |
| 9  | 55307731 | 55316380 | NM_145615    | chr9  | 55311601 | 55312315 |
| 17 | 55303220 | 55311719 | NM_028370    | chr17 | 55306742 | 55307358 |
| 19 | 55291987 | 55300486 | AY395631     | chr19 | 55296541 | 55297130 |
| 6  | 55060039 | 55068550 | NM_009953    | chr6  | 55061914 | 55062544 |
| 6  | 55044992 | 55053563 | AY445512     | chr6  | 55050886 | 55051666 |
| 13 | 55028027 | 55036956 | NM_001033245 | chr13 | 55032278 | 55032897 |
| 13 | 55028027 | 55036956 | NM_001033245 | chr13 | 55027577 | 55028460 |
| 8  | 55004424 | 55012923 | NM_001005847 | chr8  | 55004450 | 55005134 |
| 14 | 54990194 | 54998711 | NM_008571    | chr14 | 54992172 | 54993195 |
| 14 | 54896132 | 54904809 | NM_010780    | chr14 | 54904750 | 54905367 |
| 14 | 54899051 | 54907550 | M68899       | chr14 | 54904750 | 54905367 |
| 14 | 54585332 | 54603877 | NM_024267    | chr14 | 54589982 | 54590564 |
| 9  | 54556944 | 54565456 | NM_013496    | chr9  | 54560310 | 54560915 |
| 6  | 54518689 | 54535224 | NM_001001335 | chr6  | 54530284 | 54531154 |
| 6  | 54493437 | 54501960 | NM_027268    | chr6  | 54496264 | 54496872 |
| 14 | 54475763 | 54493519 | NM_008736    | chr14 | 54476667 | 54477325 |
| X  | 54371412 | 54379926 | NM_009575    | chrX  | 54372235 | 54373319 |
| 6  | 54357300 | 54365799 | NM_198118    | chr6  | 54363650 | 54364256 |
| 12 | 54164303 | 54172802 | NM_013780    | chr12 | 54169870 | 54170644 |
| 15 | 54105885 | 54114567 | NM_008764    | chr15 | 54111202 | 54111803 |
| 11 | 54108198 | 54116702 | NM_010556    | chr11 | 54109197 | 54110341 |
| 13 | 54075490 | 54084008 | NM_027324    | chr13 | 54078770 | 54079180 |
| 19 | 54034764 | 54043263 | BC049775     | chr19 | 54042658 | 54043094 |
| 17 | 53770731 | 53780985 | NM_022025    | chr17 | 53776275 | 53777067 |
| 9  | 53770939 | 53779438 | NM_177769    | chr9  | 53773750 | 53774775 |
| 10 | 53761061 | 53770211 | NM_008548    | chr10 | 53760980 | 53761851 |
| 9  | 53563675 | 53572174 | NM_028060    | chr9  | 53571053 | 53571656 |

|   |    |          |                       |       |          |          |
|---|----|----------|-----------------------|-------|----------|----------|
|   | 6  | 53528040 | 53536539 BC029022     | chr6  | 53528383 | 53529030 |
|   | 1  | 53252206 | 53260707 NM_028091    | chr1  | 53252760 | 53253377 |
|   | 3  | 53102626 | 53111145 NM_026225    | chr3  | 53107073 | 53107812 |
|   | 14 | 53074278 | 53082777 BC038285     | chr14 | 53078802 | 53079457 |
| X |    | 52950638 | 52959137 NM_172780    | chrX  | 52957750 | 52958377 |
|   | 4  | 52930393 | 52938892 NM_146839    | chr4  | 52935708 | 52936439 |
|   | 2  | 52496092 | 52504591 NM_001037099 | chr2  | 52498676 | 52499347 |
|   | 3  | 52350303 | 52358846 NM_019739    | chr3  | 52351851 | 52352588 |
|   | 6  | 52274057 | 52282882 NM_001048058 | chr6  | 52277094 | 52277807 |
|   | 6  | 52274057 | 52282882 NM_001048058 | chr6  | 52274476 | 52275110 |
|   | 6  | 52128026 | 52170522 NM_008263    | chr6  | 52142892 | 52143933 |
|   | 6  | 52128026 | 52170522 NM_008263    | chr6  | 52138267 | 52138912 |
|   | 6  | 52128026 | 52170522 NM_008263    | chr6  | 52128626 | 52129816 |
|   | 11 | 51986855 | 51995354 NM_207227    | chr11 | 51992760 | 51993861 |
|   | 3  | 51941713 | 51950543 NM_001004176 | chr3  | 51946343 | 51946937 |
|   | 2  | 51754397 | 51763172 NM_030243    | chr2  | 51759779 | 51760714 |
|   | 7  | 51740986 | 51749668 NM_008087    | chr7  | 51747649 | 51748238 |
|   | 10 | 51704946 | 51713600 NM_153786    | chr10 | 51709253 | 51710337 |
|   | 3  | 51646030 | 51654752 NM_080793    | chr3  | 51651942 | 51652861 |
|   | 7  | 51608666 | 51617166 BC083065     | chr7  | 51607875 | 51608930 |
|   | 13 | 51577081 | 51585580 NM_009167    | chr13 | 51584876 | 51585554 |
|   | 12 | 51568606 | 51577105 NM_008858    | chr12 | 51574372 | 51574985 |
|   | 7  | 51484025 | 51492969 NM_080853    | chr7  | 51485011 | 51485608 |
|   | 10 | 51360225 | 51376432 NM_177306    | chr10 | 51372767 | 51373457 |
|   | 13 | 51177519 | 51186055 NM_029173    | chr13 | 51182234 | 51182832 |
|   | 14 | 51090954 | 51099453 BC012433     | chr14 | 51099028 | 51099431 |
|   | 14 | 50955561 | 50964060 NM_001001808 | chr14 | 50959096 | 50959683 |
|   | 14 | 50955561 | 50964060 NM_001001808 | chr14 | 50957512 | 50958121 |
|   | 11 | 50822126 | 50830625 NM_146911    | chr11 | 50824797 | 50825635 |
|   | 11 | 50728367 | 50736924 NM_172794    | chr11 | 50734100 | 50734889 |
|   | 11 | 50728367 | 50736924 NM_172794    | chr11 | 50732822 | 50733719 |
|   | 15 | 50710381 | 50726115 NM_032000    | chr15 | 50715726 | 50716403 |
|   | 6  | 50581528 | 50590027 NM_021892    | chr6  | 50584167 | 50584758 |
|   | 10 | 50578066 | 50586772 NM_011376    | chr10 | 50583892 | 50584597 |
|   | 3  | 50537276 | 50545808 NM_011990    | chr3  | 50542625 | 50543497 |
|   | 16 | 50508003 | 50516502 NM_027046    | chr16 | 50510161 | 50510886 |
|   | 16 | 50508003 | 50516502 NM_027046    | chr16 | 50507145 | 50508068 |
|   | 13 | 50473804 | 50482303 NM_001033400 | chr13 | 50480414 | 50481241 |
|   | 7  | 50461209 | 50469708 NM_172901    | chr7  | 50467555 | 50468672 |
|   | 18 | 50397699 | 50406198 NM_001004061 | chr18 | 50403985 | 50404813 |
|   | 14 | 50367913 | 50376413 NM_009487    | chr14 | 50371975 | 50372608 |
|   | 19 | 50303490 | 50311989 BC007486     | chr19 | 50307220 | 50307916 |
|   | 12 | 50253134 | 50262909 NM_008241    | chr12 | 50253194 | 50254118 |
|   | 11 | 50133217 | 50141739 AY442299     | chr11 | 50140963 | 50141569 |
|   | 6  | 50129654 | 50138153 U42384       | chr6  | 50135546 | 50136054 |
|   | 14 | 50115375 | 50123874 NM_007449    | chr14 | 50117563 | 50118210 |
|   | 18 | 50081972 | 50090471 BC020141     | chr18 | 50087443 | 50088058 |

|   |    |          |                       |       |          |          |
|---|----|----------|-----------------------|-------|----------|----------|
|   | 14 | 50066193 | 50074718 NM_011271    | chr14 | 50072525 | 50073118 |
|   | 14 | 50066193 | 50074718 NM_011271    | chr14 | 50068738 | 50069329 |
|   | 14 | 50007068 | 50020863 NM_201239    | chr14 | 50017423 | 50018393 |
|   | 14 | 50007068 | 50020863 NM_201239    | chr14 | 50015541 | 50016068 |
| X |    | 49835810 | 49844309 NM_024170    | chrX  | 49838824 | 49839456 |
|   | 6  | 49746315 | 49754814 NM_023456    | chr6  | 49748007 | 49749006 |
|   | 4  | 49563519 | 49576589 NM_144903    | chr4  | 49570268 | 49570897 |
|   | 14 | 49558234 | 49566733 NM_146299    | chr14 | 49564366 | 49565213 |
|   | 4  | 49536325 | 49544909 NM_145547    | chr4  | 49537222 | 49537677 |
|   | 10 | 49469325 | 49483082 NM_010349    | chr10 | 49475139 | 49476018 |
|   | 11 | 49389172 | 49397671 NM_146469    | chr11 | 49389177 | 49389753 |
|   | 11 | 49372610 | 49381109 NM_001011790 | chr11 | 49375902 | 49376506 |
|   | 11 | 49361148 | 49369647 NM_207574    | chr11 | 49366758 | 49367341 |
|   | 11 | 49351041 | 49359540 NM_146472    | chr11 | 49357046 | 49358064 |
|   | 14 | 49329497 | 49337996 NM_146420    | chr14 | 49335133 | 49336124 |
|   | 11 | 49307576 | 49316075 NM_001011741 | chr11 | 49311819 | 49312594 |
|   | 13 | 49219644 | 49233963 NM_026738    | chr13 | 49230604 | 49231244 |
|   | 14 | 49201723 | 49210222 NM_146665    | chr14 | 49203370 | 49203957 |
|   | 11 | 49130720 | 49139223 NM_146470    | chr11 | 49131714 | 49132566 |
|   | 11 | 49117573 | 49126072 NM_146471    | chr11 | 49123014 | 49123857 |
|   | 11 | 49117573 | 49126072 NM_146471    | chr11 | 49121313 | 49122493 |
|   | 14 | 49106670 | 49115169 NM_146493    | chr14 | 49109424 | 49110342 |
|   | 11 | 49027969 | 49036512 NM_172793    | chr11 | 49030114 | 49030749 |
|   | 14 | 48880548 | 48889047 NM_146492    | chr14 | 48883725 | 48884848 |
|   | 14 | 48848994 | 48857493 NM_001011530 | chr14 | 48850502 | 48851100 |
|   | 9  | 48801564 | 48810063 NM_012039    | chr9  | 48804992 | 48805509 |
|   | 7  | 48744227 | 48755617 NM_001013368 | chr7  | 48748546 | 48749235 |
|   | 13 | 48635011 | 48643517 NM_207232    | chr13 | 48635983 | 48636650 |
|   | 5  | 48267041 | 48275540 NM_178804    | chr5  | 48269288 | 48269903 |
|   | 9  | 48230015 | 48238578 NM_024233    | chr9  | 48232509 | 48233117 |
|   | 8  | 48122550 | 48131049 U19522       | chr8  | 48125059 | 48125702 |
| X |    | 47922597 | 47932229 NM_001077202 | chrX  | 47930009 | 47930622 |
|   | 7  | 47893120 | 47901623 NM_207540    | chr7  | 47894175 | 47894686 |
|   | 7  | 47847618 | 47856318 NM_153524    | chr7  | 47850887 | 47852118 |
|   | 7  | 47847618 | 47856318 NM_153524    | chr7  | 47848571 | 47849556 |
|   | 6  | 47801141 | 47809749 NM_146175    | chr6  | 47807784 | 47808388 |
|   | 14 | 47582324 | 47595457 NM_144841    | chr14 | 47586322 | 47587097 |
|   | 14 | 47582324 | 47595457 NM_144841    | chr14 | 47582535 | 47583177 |
|   | 4  | 47489761 | 47498300 NM_024171    | chr4  | 47493209 | 47494215 |
|   | 4  | 47492902 | 47501425 NM_019998    | chr4  | 47493209 | 47494215 |
|   | 7  | 47466894 | 47475394 NM_153067    | chr7  | 47471358 | 47472873 |
|   | 7  | 47466894 | 47475394 NM_153067    | chr7  | 47468921 | 47470141 |
|   | 7  | 47394385 | 47402884 NM_153101    | chr7  | 47399329 | 47400180 |
|   | 7  | 47219763 | 47228262 NM_153095    | chr7  | 47221423 | 47223072 |
|   | 14 | 47100957 | 47109456 BC027062     | chr14 | 47103211 | 47103819 |
|   | 7  | 46912662 | 46921194 NM_026436    | chr7  | 46914908 | 46915495 |
|   | 18 | 46695697 | 46705863 NM_173394    | chr18 | 46698472 | 46699110 |

|   |    |          |                       |       |          |          |
|---|----|----------|-----------------------|-------|----------|----------|
|   | 11 | 46648222 | 46656741 NM_178759    | chr11 | 46653562 | 46654355 |
|   | 14 | 46579654 | 46588155 NM_008477    | chr14 | 46585288 | 46586217 |
|   | 13 | 46507060 | 46515618 NM_026056    | chr13 | 46509098 | 46510098 |
|   | 17 | 46429993 | 46438492 BC031403     | chr17 | 46434453 | 46435051 |
|   | 18 | 46403682 | 46412181 NM_172627    | chr18 | 46411208 | 46411903 |
|   | 4  | 46359294 | 46367793 NM_183298    | chr4  | 46366695 | 46367430 |
|   | 16 | 46071885 | 46080384 BC015304     | chr16 | 46076086 | 46076821 |
|   | 19 | 46044463 | 46059343 NM_176785    | chr19 | 46046205 | 46046684 |
| X |    | 46030334 | 46048372 NM_177591    | chrX  | 46035474 | 46036315 |
|   | 4  | 46002560 | 46011059 NM_146142    | chr4  | 46008595 | 46009286 |
|   | 14 | 45984881 | 45993380 BC049740     | chr14 | 45985825 | 45986475 |
|   | 9  | 45949199 | 45957698 BC082313     | chr9  | 45955200 | 45955784 |
|   | 17 | 45786489 | 45797245 NM_145140    | chr17 | 45790754 | 45791349 |
|   | 14 | 45741550 | 45758367 NM_022023    | chr14 | 45752947 | 45754015 |
|   | 14 | 45748108 | 45756620 NM_026832    | chr14 | 45752947 | 45754015 |
|   | 14 | 45741550 | 45758367 NM_022023    | chr14 | 45748439 | 45749126 |
|   | 14 | 45748108 | 45756620 NM_026832    | chr14 | 45748439 | 45749126 |
|   | 16 | 45602209 | 45618990 NM_172455    | chr16 | 45609557 | 45610187 |
|   | 16 | 45602209 | 45618990 NM_172455    | chr16 | 45607098 | 45607713 |
|   | 16 | 45570951 | 45579450 NM_145389    | chr16 | 45578750 | 45579390 |
|   | 16 | 45570951 | 45579450 NM_145389    | chr16 | 45576766 | 45577349 |
|   | 10 | 45557705 | 45566213 BC106147     | chr10 | 45558368 | 45558976 |
|   | 7  | 45531851 | 45540436 NM_018876    | chr7  | 45532180 | 45532721 |
| X |    | 45530344 | 45538869 NM_145951    | chrX  | 45530823 | 45532014 |
|   | 5  | 45085368 | 45093955 NM_001077398 | chr5  | 45092562 | 45093196 |
|   | 8  | 45018281 | 45026780 NM_001009547 | chr8  | 45020137 | 45021297 |
|   | 8  | 45018281 | 45026780 NM_001009547 | chr8  | 45018643 | 45019593 |
|   | 4  | 44939253 | 44949241 NM_138590    | chr4  | 44946986 | 44947915 |
|   | 7  | 44863122 | 44872754 NM_029410    | chr7  | 44870821 | 44871420 |
| X |    | 44758097 | 44766663 NM_011228    | chrX  | 44765527 | 44766136 |
|   | 9  | 44726876 | 44735375 NM_013487    | chr9  | 44729195 | 44729818 |
|   | 9  | 44728833 | 44737421 NM_009850    | chr9  | 44729195 | 44729818 |
|   | 9  | 44669174 | 44677705 BC086880     | chr9  | 44672136 | 44672607 |
|   | 18 | 44453405 | 44461931 NM_001033621 | chr18 | 44460405 | 44461032 |
|   | 18 | 44453405 | 44461931 NM_001033621 | chr18 | 44455430 | 44456257 |
|   | 7  | 44408980 | 44427965 NM_011131    | chr7  | 44418713 | 44419380 |
|   | 16 | 44414042 | 44422541 BC056138     | chr16 | 44414333 | 44415096 |
| X |    | 44347502 | 44356187 NM_133213    | chrX  | 44349162 | 44349973 |
|   | 19 | 44250599 | 44259200 NM_024450    | chr19 | 44254446 | 44254930 |
|   | 14 | 44245701 | 44254200 NM_025959    | chr14 | 44251380 | 44252035 |
|   | 11 | 44237486 | 44246008 NM_008352    | chr11 | 44241662 | 44242291 |
|   | 5  | 44107387 | 44115886 BC047214     | chr5  | 44112379 | 44112943 |
|   | 9  | 43999956 | 44008459 NM_133226    | chr9  | 44004027 | 44005168 |
|   | 18 | 43915710 | 43924209 NM_001033280 | chr18 | 43916611 | 43917535 |
|   | 18 | 43883658 | 43892165 NM_054038    | chr18 | 43884851 | 43885456 |
|   | 4  | 43789610 | 43798109 NM_019476    | chr4  | 43792230 | 43792864 |
|   | 19 | 43725390 | 43734192 NM_145156    | chr19 | 43728901 | 43729494 |

|    |          |          |              |       |          |          |
|----|----------|----------|--------------|-------|----------|----------|
| 1  | 43669239 | 43677738 | NM_024283    | chr1  | 43676058 | 43676658 |
| 7  | 43469267 | 43480340 | NM_028913    | chr7  | 43473225 | 43474062 |
| 6  | 43140490 | 43148989 | NM_146369    | chr6  | 43146570 | 43147359 |
| 13 | 43127811 | 43139359 | NM_001005748 | chr13 | 43137706 | 43138324 |
| 6  | 43090667 | 43106058 | NM_146652    | chr6  | 43105253 | 43105739 |
| 6  | 43090667 | 43106058 | NM_146652    | chr6  | 43092516 | 43093495 |
| 17 | 43090855 | 43099354 | NM_198418    | chr17 | 43090888 | 43091918 |
| 4  | 43044357 | 43073303 | NM_020035    | chr4  | 43055768 | 43056224 |
| 1  | 42891418 | 42900008 | NM_053107    | chr1  | 42896697 | 42897313 |
| 6  | 42850840 | 42859339 | NM_146295    | chr6  | 42851195 | 42851734 |
| 6  | 42761490 | 42769989 | NM_147064    | chr6  | 42764162 | 42764948 |
| 9  | 42692867 | 42701366 | NM_175481    | chr9  | 42697055 | 42697709 |
| 6  | 42685661 | 42694160 | NM_146986    | chr6  | 42692179 | 42693176 |
| 6  | 42667646 | 42676145 | NM_001011799 | chr6  | 42673532 | 42674182 |
| 6  | 42667646 | 42676145 | NM_001011799 | chr6  | 42671775 | 42672511 |
| 6  | 42524480 | 42532979 | NM_203396    | chr6  | 42530742 | 42531423 |
| 17 | 42474039 | 42482589 | NM_178589    | chr17 | 42481103 | 42481852 |
| 10 | 42443911 | 42452657 | NM_153055    | chr10 | 42446563 | 42447160 |
| 18 | 42385545 | 42394100 | BC052715     | chr18 | 42391595 | 42392372 |
| 19 | 42294885 | 42311593 | NM_027694    | chr19 | 42303941 | 42304795 |
| 8  | 42167911 | 42180674 | NM_010086    | chr8  | 42179926 | 42180653 |
| 11 | 42161932 | 42170431 | NM_008068    | chr11 | 42163101 | 42163698 |
| 9  | 42148425 | 42156924 | NM_009347    | chr9  | 42152783 | 42153394 |
| 8  | 42131104 | 42139609 | NM_001040699 | chr8  | 42138103 | 42138760 |
| 8  | 42131104 | 42139609 | NM_001040699 | chr8  | 42132527 | 42133491 |
| 5  | 42049969 | 42058748 | NM_007524    | chr5  | 42053753 | 42054536 |
| 19 | 42029074 | 42037573 | NM_145500    | chr19 | 42029457 | 42030055 |
| 9  | 42012696 | 42021251 | NM_172769    | chr9  | 42016331 | 42016924 |
| 8  | 42006488 | 42016561 | NM_011135    | chr8  | 42015241 | 42016046 |
| 8  | 42004600 | 42013184 | NM_033560    | chr8  | 42010447 | 42011090 |
| 8  | 42006488 | 42016561 | NM_011135    | chr8  | 42010447 | 42011090 |
| 12 | 41993675 | 42002391 | NM_010733    | chr12 | 41994658 | 41995289 |
| 6  | 41962001 | 41970514 | NM_009299    | chr6  | 41967436 | 41968032 |
| 4  | 41938014 | 41953390 | NM_010549    | chr4  | 41940616 | 41941250 |
| 6  | 41875235 | 41883739 | NM_027832    | chr6  | 41879005 | 41879768 |
| 13 | 41855963 | 41864462 | NM_175417    | chr13 | 41862179 | 41862971 |
| 4  | 41703505 | 41712004 | NM_001048005 | chr4  | 41704589 | 41705440 |
| 6  | 41461824 | 41475330 | BC034887     | chr6  | 41468574 | 41469385 |
| 19 | 41307015 | 41323315 | NM_133352    | chr19 | 41308042 | 41308623 |
| 7  | 41270071 | 41279043 | NM_177764    | chr7  | 41271492 | 41272364 |
| 6  | 41225876 | 41234378 | NM_011646    | chr6  | 41233312 | 41233920 |
| 10 | 41125387 | 41141349 | NM_153398    | chr10 | 41136435 | 41137154 |
| 7  | 41051480 | 41059979 | NM_001033782 | chr7  | 41058528 | 41059482 |
| 7  | 41051480 | 41059979 | NM_001033782 | chr7  | 41056111 | 41058114 |
| X  | 41032129 | 41040778 | NM_178739    | chrX  | 41034781 | 41035373 |
| 12 | 40950476 | 40958975 | NM_172803    | chr12 | 40952370 | 40953219 |
| 19 | 40878590 | 40887118 | NM_172839    | chr19 | 40884598 | 40885198 |

|    |          |          |              |       |          |          |
|----|----------|----------|--------------|-------|----------|----------|
| 7  | 40666353 | 40674852 | NM_021387    | chr7  | 40667073 | 40667668 |
| 11 | 40594916 | 40604709 | NM_009831    | chr11 | 40598900 | 40599496 |
| 10 | 40565988 | 40574490 | NM_031877    | chr10 | 40568970 | 40569775 |
| 10 | 40569034 | 40577533 | BC061220     | chr10 | 40568970 | 40569775 |
| 12 | 40544670 | 40554410 | NM_001039515 | chr12 | 40550640 | 40551251 |
| 1  | 40404222 | 40413051 | NM_008365    | chr1  | 40404767 | 40405394 |
| 19 | 40136995 | 40145498 | NM_134144    | chr19 | 40143913 | 40145037 |
| 14 | 40089349 | 40099876 | NM_009160    | chr14 | 40098349 | 40098946 |
| 14 | 40089349 | 40099876 | NM_009160    | chr14 | 40092754 | 40093665 |
| 5  | 40041225 | 40049724 | NM_010474    | chr5  | 40044039 | 40045250 |
| 5  | 40041225 | 40049724 | NM_010474    | chr5  | 40041478 | 40042194 |
| 6  | 40033860 | 40042359 | NM_001004182 | chr6  | 40037418 | 40038018 |
| 6  | 40033860 | 40042359 | NM_001004182 | chr6  | 40035539 | 40036557 |
| 18 | 39893471 | 39901991 | NM_011033    | chr18 | 39900151 | 39901041 |
| 9  | 39892693 | 39901276 | BC116871     | chr9  | 39893396 | 39893746 |
| 9  | 39876031 | 39884530 | NM_146855    | chr9  | 39877668 | 39878413 |
| 15 | 39771332 | 39780068 | NM_172814    | chr15 | 39777512 | 39778104 |
| 9  | 39766923 | 39775422 | NM_146286    | chr9  | 39772984 | 39773730 |
| 9  | 39749322 | 39763600 | NM_147108    | chr9  | 39757849 | 39758500 |
| 6  | 39738044 | 39746543 | NM_010270    | chr6  | 39739613 | 39740251 |
| 15 | 39684963 | 39693541 | NM_022722    | chr15 | 39692814 | 39693398 |
| 9  | 39584007 | 39592506 | NM_146614    | chr9  | 39589468 | 39590082 |
| 9  | 39494959 | 39503458 | NM_001011826 | chr9  | 39499630 | 39500247 |
| 9  | 39391293 | 39399798 | NM_146504    | chr9  | 39396265 | 39397213 |
| 9  | 39367696 | 39376195 | NM_146279    | chr9  | 39371813 | 39372446 |
| 19 | 39334396 | 39342913 | NM_007815    | chr19 | 39335778 | 39336507 |
| 9  | 39321386 | 39329885 | NM_146508    | chr9  | 39325312 | 39325961 |
| 9  | 39321386 | 39329885 | NM_146508    | chr9  | 39321614 | 39322446 |
| 9  | 39259790 | 39268289 | NM_146745    | chr9  | 39260642 | 39261588 |
| 9  | 39218796 | 39227295 | NM_207141    | chr9  | 39224776 | 39225406 |
| 9  | 39218796 | 39227295 | NM_207141    | chr9  | 39220455 | 39221145 |
| 7  | 39184821 | 39193364 | NM_177890    | chr7  | 39187435 | 39188789 |
| 7  | 39184821 | 39193364 | NM_177890    | chr7  | 39185525 | 39186324 |
| 5  | 39162440 | 39171061 | NM_013748    | chr5  | 39168982 | 39169429 |
| 9  | 39138364 | 39146863 | NM_001011812 | chr9  | 39144406 | 39145290 |
| 1  | 39132750 | 39141317 | NM_008719    | chr1  | 39134787 | 39135489 |
| 9  | 38928751 | 38937250 | NM_146326    | chr9  | 38935028 | 38935958 |
| 9  | 38826888 | 38835387 | NM_146438    | chr9  | 38834270 | 38834928 |
| 9  | 38826888 | 38835387 | NM_146438    | chr9  | 38827802 | 38828987 |
| 6  | 38764332 | 38772831 | AF208292     | chr6  | 38768722 | 38769332 |
| 9  | 38743505 | 38752004 | NM_146746    | chr9  | 38743599 | 38744864 |
| 9  | 38720222 | 38728721 | NM_146441    | chr9  | 38726142 | 38727032 |
| 9  | 38674660 | 38683161 | NM_146272    | chr9  | 38680577 | 38681455 |
| 9  | 38621697 | 38630196 | NM_146815    | chr9  | 38627919 | 38628995 |
| 9  | 38572264 | 38580763 | NM_146816    | chr9  | 38576461 | 38577087 |
| 9  | 38519828 | 38528327 | NM_146782    | chr9  | 38527451 | 38528282 |
| 9  | 38519828 | 38528327 | NM_146782    | chr9  | 38525236 | 38526472 |

|    |          |          |              |       |          |          |
|----|----------|----------|--------------|-------|----------|----------|
| 9  | 38462869 | 38476984 | NM_172767    | chr9  | 38475856 | 38476463 |
| 9  | 38446448 | 38454947 | NM_146440    | chr9  | 38449173 | 38450281 |
| 9  | 38406462 | 38430052 | NM_146375    | chr9  | 38423257 | 38424161 |
| 9  | 38406462 | 38430052 | NM_146375    | chr9  | 38407906 | 38408960 |
| 2  | 38327706 | 38336322 | NM_021606    | chr2  | 38331825 | 38332424 |
| 6  | 38281618 | 38290211 | NM_028864    | chr6  | 38288122 | 38288663 |
| 9  | 38260605 | 38276804 | NM_146873    | chr9  | 38274518 | 38275354 |
| 9  | 38260605 | 38276804 | NM_146873    | chr9  | 38273605 | 38274366 |
| 9  | 38243242 | 38251741 | NM_146805    | chr9  | 38245422 | 38246165 |
| 9  | 38217320 | 38225819 | NM_146804    | chr9  | 38223339 | 38224455 |
| 9  | 38193445 | 38201944 | NM_146802    | chr9  | 38199597 | 38200595 |
| 13 | 38197950 | 38214932 | NM_026382    | chr13 | 38198195 | 38199313 |
| 9  | 38174855 | 38183354 | NM_001011806 | chr9  | 38177112 | 38177783 |
| 9  | 38147447 | 38155946 | NM_146869    | chr9  | 38152988 | 38154244 |
| 18 | 38075572 | 38084099 | NM_153793    | chr18 | 38082987 | 38083574 |
| 18 | 38078403 | 38086962 | NM_010411    | chr18 | 38082987 | 38083574 |
| 5  | 38017797 | 38026296 | BC116224     | chr5  | 38019592 | 38020174 |
| 16 | 38002240 | 38012243 | NM_019827    | chr16 | 38007968 | 38008825 |
| 17 | 37937212 | 37945711 | NM_146807    | chr17 | 37943252 | 37944263 |
| 17 | 37911013 | 37919512 | NM_146488    | chr17 | 37914179 | 37914939 |
| 17 | 37911013 | 37919512 | NM_146488    | chr17 | 37912533 | 37913656 |
| 7  | 37886374 | 37900191 | NM_028166    | chr7  | 37898627 | 37899422 |
| 7  | 37886374 | 37900191 | NM_028166    | chr7  | 37887575 | 37888139 |
| 9  | 37853259 | 37868868 | NM_146424    | chr9  | 37863369 | 37863993 |
| 16 | 37829735 | 37838234 | NM_153394    | chr16 | 37829902 | 37830504 |
| 18 | 37794309 | 37822874 | NM_033586    | chr18 | 37819479 | 37820728 |
| 18 | 37794309 | 37822874 | NM_033586    | chr18 | 37814860 | 37817511 |
| 18 | 37794309 | 37822874 | NM_033586    | chr18 | 37810014 | 37811195 |
| 18 | 37794309 | 37822874 | NM_033586    | chr18 | 37808794 | 37809387 |
| 18 | 37794309 | 37822874 | NM_033586    | chr18 | 37806409 | 37807145 |
| 18 | 37794309 | 37822874 | NM_033586    | chr18 | 37802858 | 37803664 |
| 18 | 37794309 | 37822874 | NM_033586    | chr18 | 37798560 | 37800837 |
| 18 | 37794309 | 37822874 | NM_033586    | chr18 | 37795574 | 37796740 |
| 6  | 37794419 | 37803180 | NM_145076    | chr6  | 37795524 | 37796421 |
| 18 | 37794309 | 37822874 | NM_033586    | chr18 | 37794382 | 37794999 |
| 9  | 37770379 | 37778878 | NM_146419    | chr9  | 37775970 | 37776561 |
| 17 | 37688530 | 37697029 | NM_146867    | chr17 | 37688804 | 37689546 |
| 17 | 37661145 | 37669644 | NM_146327    | chr17 | 37662839 | 37663767 |
| 18 | 37633626 | 37646832 | NM_053147    | chr18 | 37644918 | 37645974 |
| 18 | 37593514 | 37632802 | NM_053143    | chr18 | 37630210 | 37631116 |
| 18 | 37593514 | 37632802 | NM_053143    | chr18 | 37623811 | 37624728 |
| 18 | 37593514 | 37632802 | NM_053143    | chr18 | 37622026 | 37622834 |
| 18 | 37593514 | 37632802 | NM_053143    | chr18 | 37615534 | 37616383 |
| 18 | 37593514 | 37632802 | NM_053143    | chr18 | 37611282 | 37612469 |
| 18 | 37593514 | 37632802 | NM_053143    | chr18 | 37607722 | 37608557 |
| 18 | 37593514 | 37632802 | NM_053143    | chr18 | 37600138 | 37601050 |
| 18 | 37555759 | 37576153 | NM_053139    | chr18 | 37572166 | 37573160 |

|    |          |          |              |       |          |          |
|----|----------|----------|--------------|-------|----------|----------|
| 18 | 37555759 | 37576153 | NM_053139    | chr18 | 37561342 | 37562465 |
| 9  | 37547560 | 37556059 | NM_146883    | chr9  | 37553513 | 37554127 |
| 18 | 37541392 | 37549891 | NM_053136    | chr18 | 37548276 | 37549044 |
| 18 | 37541392 | 37549891 | NM_053136    | chr18 | 37547272 | 37548160 |
| 18 | 37531648 | 37540147 | NM_053135    | chr18 | 37538221 | 37539432 |
| 18 | 37531648 | 37540147 | NM_053135    | chr18 | 37532112 | 37532525 |
| 17 | 37525621 | 37534120 | NM_206816    | chr17 | 37529730 | 37530324 |
| 19 | 37493985 | 37502497 | NM_008245    | chr19 | 37500446 | 37501109 |
| 16 | 37493460 | 37502036 | NM_013547    | chr16 | 37493395 | 37493768 |
| 18 | 37475245 | 37483744 | NM_053133    | chr18 | 37481840 | 37483272 |
| 18 | 37475245 | 37483744 | NM_053133    | chr18 | 37480908 | 37481751 |
| 18 | 37454002 | 37470213 | NM_053132    | chr18 | 37467039 | 37467644 |
| 18 | 37454002 | 37470213 | NM_053132    | chr18 | 37464875 | 37465591 |
| 17 | 37452647 | 37461146 | NM_146890    | chr17 | 37455330 | 37456072 |
| 18 | 37414814 | 37435955 | NM_053128    | chr18 | 37434172 | 37435163 |
| 18 | 37414814 | 37435955 | NM_053128    | chr18 | 37426870 | 37428363 |
| 17 | 37407122 | 37415621 | NM_147062    | chr17 | 37411914 | 37412496 |
| 2  | 37399351 | 37407850 | NM_176932    | chr2  | 37406542 | 37407127 |
| 17 | 37397499 | 37405998 | NM_146630    | chr17 | 37403331 | 37403918 |
| 18 | 37384972 | 37393471 | NM_053126    | chr18 | 37392138 | 37393441 |
| 17 | 37350919 | 37359418 | NM_146629    | chr17 | 37356774 | 37357424 |
| 17 | 37328052 | 37336551 | NM_146631    | chr17 | 37334308 | 37335051 |
| 17 | 37298717 | 37311224 | NM_001011830 | chr17 | 37308893 | 37310026 |
| 17 | 37274078 | 37282577 | NM_213721    | chr17 | 37280122 | 37281085 |
| 3  | 37249218 | 37257726 | NM_009350    | chr3  | 37255509 | 37256123 |
| 17 | 37230187 | 37238686 | NM_146632    | chr17 | 37231761 | 37232398 |
| 3  | 37222249 | 37230748 | BC027125     | chr3  | 37227727 | 37228566 |
| 17 | 37216309 | 37224808 | NM_001011753 | chr17 | 37217930 | 37218558 |
| 17 | 37175003 | 37189474 | NM_001013575 | chr17 | 37182510 | 37183382 |
| 9  | 37177306 | 37188672 | AF060570     | chr9  | 37181061 | 37181653 |
| 18 | 37087605 | 37102275 | NM_001003672 | chr18 | 37096430 | 37097184 |
| 18 | 37087605 | 37102275 | NM_001003672 | chr18 | 37090017 | 37090902 |
| 5  | 37082454 | 37090972 | NM_026242    | chr5  | 37082275 | 37082913 |
| 18 | 37072649 | 37081214 | NM_007766    | chr18 | 37079089 | 37079805 |
| 17 | 37068261 | 37076760 | NM_146835    | chr17 | 37073439 | 37074436 |
| 17 | 37007603 | 37016102 | NM_146511    | chr17 | 37013920 | 37014537 |
| 17 | 36984560 | 36993059 | NM_001011744 | chr17 | 36991276 | 36991867 |
| 17 | 36919936 | 36928435 | NM_001011721 | chr17 | 36921595 | 36922507 |
| 2  | 36905256 | 36913755 | NM_146368    | chr2  | 36906951 | 36907546 |
| 17 | 36869303 | 36881291 | NM_146510    | chr17 | 36870696 | 36871339 |
| 17 | 36837922 | 36846421 | NM_146512    | chr17 | 36839397 | 36840163 |
| 2  | 36825157 | 36833656 | NM_207235    | chr2  | 36826209 | 36826937 |
| 17 | 36817405 | 36825904 | NM_146513    | chr17 | 36821320 | 36821940 |
| 2  | 36812736 | 36821235 | NM_146623    | chr2  | 36818022 | 36818642 |
| 18 | 36799566 | 36810068 | NM_026404    | chr18 | 36805651 | 36806834 |
| 18 | 36802841 | 36811340 | NM_146085    | chr18 | 36805651 | 36806834 |
| 3  | 36760984 | 36769547 | NM_009828    | chr3  | 36761978 | 36762576 |



|    |          |          |              |       |          |          |
|----|----------|----------|--------------|-------|----------|----------|
| 2  | 36753130 | 36761629 | NM_146624    | chr2  | 36758712 | 36759381 |
| 13 | 36739421 | 36747922 | NM_153529    | chr13 | 36744191 | 36744853 |
| 15 | 36733082 | 36744833 | NM_011740    | chr15 | 36740359 | 36741043 |
| 2  | 36627922 | 36641099 | NM_206903    | chr2  | 36634037 | 36634894 |
| 17 | 36586791 | 36603577 | NM_029747    | chr17 | 36596018 | 36596637 |
| 2  | 36504013 | 36512512 | NM_146938    | chr2  | 36508535 | 36509611 |
| 9  | 36436891 | 36445420 | NM_007391    | chr9  | 36442348 | 36442993 |
| 2  | 36343397 | 36351896 | NM_146948    | chr2  | 36346342 | 36347191 |
| 8  | 36295447 | 36303946 | BC094602     | chr8  | 36299862 | 36300480 |
| 2  | 36237409 | 36245908 | NM_146949    | chr2  | 36244287 | 36244943 |
| 19 | 36182440 | 36190986 | NM_013468    | chr19 | 36185971 | 36186782 |
| 17 | 36149128 | 36157627 | NM_177635    | chr17 | 36157055 | 36157580 |
| 19 | 36142875 | 36151374 | NM_019428    | chr19 | 36145287 | 36146213 |
| 12 | 36117477 | 36126061 | NM_013464    | chr12 | 36120512 | 36121126 |
| 14 | 36007091 | 36015703 | NM_130878    | chr14 | 36010248 | 36011229 |
| 13 | 35995782 | 36005013 | BC064755     | chr13 | 36000082 | 36000738 |
| 14 | 35989271 | 35997770 | BC049999     | chr14 | 35992000 | 35992797 |
| 14 | 35973290 | 35981789 | NM_173418    | chr14 | 35974801 | 35975396 |
| 14 | 35957690 | 35966205 | NM_021340    | chr14 | 35960496 | 35961053 |
| 14 | 35960076 | 35968575 | NM_146245    | chr14 | 35960496 | 35961053 |
| 17 | 35931704 | 35940203 | NM_013544    | chr17 | 35935835 | 35936463 |
| 18 | 35890292 | 35900080 | NM_019912    | chr18 | 35898704 | 35899284 |
| 17 | 35874774 | 35886057 | NM_024468    | chr17 | 35883970 | 35884565 |
| 7  | 35821007 | 35829514 | BC106165     | chr7  | 35827637 | 35828493 |
| 18 | 35826581 | 35835095 | NM_029669    | chr18 | 35826659 | 35827274 |
| 5  | 35589575 | 35598074 | NM_007418    | chr5  | 35590343 | 35590995 |
| 2  | 35508003 | 35521240 | NM_001001602 | chr2  | 35520468 | 35521063 |
| 16 | 35455109 | 35463817 | NM_013661    | chr16 | 35459518 | 35460495 |
| 6  | 35253763 | 35262293 | NM_173375    | chr6  | 35254726 | 35255568 |
| 6  | 35253763 | 35262293 | NM_173375    | chr6  | 35254089 | 35254678 |
| 18 | 35238863 | 35247405 | NM_009818    | chr18 | 35239865 | 35240585 |
| 5  | 35226772 | 35236203 | NM_207277    | chr5  | 35229737 | 35230338 |
| 9  | 35195747 | 35204247 | NM_021339    | chr9  | 35195820 | 35196589 |
| 4  | 34997944 | 35006443 | AF017806     | chr4  | 35002265 | 35002879 |
| 13 | 34968749 | 34977274 | NM_026947    | chr13 | 34973632 | 34974329 |
| 14 | 34918406 | 34926953 | NM_175008    | chr14 | 34923631 | 34924813 |
| 2  | 34920170 | 34928682 | NM_178885    | chr2  | 34921567 | 34922166 |
| 16 | 34908611 | 34917110 | AF314149     | chr16 | 34910701 | 34911294 |
| 15 | 34775944 | 34785137 | NM_181317    | chr15 | 34780682 | 34781510 |
| 5  | 34731708 | 34740207 | NM_001030306 | chr5  | 34732205 | 34732817 |
| 18 | 34701402 | 34717131 | NM_080637    | chr18 | 34704369 | 34705083 |
| 14 | 34638966 | 34647467 | NM_001033766 | chr14 | 34639259 | 34639900 |
| 17 | 34633473 | 34641972 | NM_023893    | chr17 | 34637854 | 34638450 |
| 19 | 34610943 | 34619442 | NM_008332    | chr19 | 34612376 | 34613062 |
| 19 | 34538632 | 34547132 | NM_009890    | chr19 | 34542668 | 34543368 |
| X  | 34305102 | 34313657 | NM_001024850 | chrX  | 34309981 | 34311106 |
| 19 | 34277621 | 34288682 | AB066213     | chr19 | 34283027 | 34283623 |

|   |    |          |                       |       |          |          |
|---|----|----------|-----------------------|-------|----------|----------|
|   | 19 | 34277621 | 34288682 AB066213     | chr19 | 34280135 | 34280880 |
|   | 3  | 34270312 | 34278875 NM_001026211 | chr3  | 34275654 | 34276570 |
|   | 17 | 34272591 | 34281090 NM_031176    | chr17 | 34273752 | 34274347 |
|   | 4  | 34266163 | 34274707 BC079564     | chr4  | 34267670 | 34268317 |
|   | 9  | 34232296 | 34241000 NM_026324    | chr9  | 34233506 | 34234093 |
|   | 10 | 34166815 | 34175435 NM_010237    | chr10 | 34169798 | 34170416 |
|   | 19 | 34160965 | 34169469 BC031933     | chr19 | 34163869 | 34164928 |
| X |    | 34143837 | 34152397 NM_023894    | chrX  | 34143575 | 34144184 |
|   | 3  | 33985744 | 33994266 NM_025978    | chr3  | 33986879 | 33987481 |
|   | 17 | 33978867 | 33987366 NM_201405    | chr17 | 33986617 | 33987288 |
| X |    | 33965142 | 33979333 NM_001040089 | chrX  | 33979293 | 33980449 |
|   | 10 | 33894468 | 33902967 NM_172508    | chr10 | 33901559 | 33902286 |
|   | 11 | 33857013 | 33865785 NM_031169    | chr11 | 33864304 | 33864922 |
|   | 11 | 33740716 | 33749527 NM_027398    | chr11 | 33741573 | 33742311 |
|   | 7  | 33724327 | 33732826 NM_009596    | chr7  | 33731236 | 33732309 |
|   | 7  | 33720144 | 33728702 NM_203502    | chr7  | 33723109 | 33723611 |
|   | 7  | 33720144 | 33728702 NM_203502    | chr7  | 33721571 | 33722559 |
|   | 13 | 33662868 | 33671367 NM_001076790 | chr13 | 33666994 | 33667924 |
|   | 14 | 33643258 | 33651757 NM_008166    | chr14 | 33648042 | 33648655 |
|   | 14 | 33643258 | 33651757 NM_008166    | chr14 | 33645596 | 33646263 |
|   | 16 | 33639203 | 33647702 NM_175256    | chr16 | 33645474 | 33647139 |
|   | 4  | 33574901 | 33583400 NM_001033225 | chr4  | 33577093 | 33577828 |
|   | 4  | 33515851 | 33524350 NM_001034867 | chr4  | 33521137 | 33521795 |
|   | 13 | 33486255 | 33494779 NM_011455    | chr13 | 33489886 | 33490592 |
|   | 19 | 33455623 | 33464122 BC052355     | chr19 | 33461749 | 33462672 |
|   | 13 | 33438068 | 33446567 U96701       | chr13 | 33438179 | 33438844 |
|   | 13 | 33325542 | 33334041 NM_183197    | chr13 | 33332981 | 33333592 |
|   | 13 | 33325542 | 33334041 NM_183197    | chr13 | 33331432 | 33332296 |
|   | 13 | 33163317 | 33173188 NM_011453    | chr13 | 33171542 | 33172502 |
|   | 17 | 32873992 | 32882675 NM_177719    | chr17 | 32874985 | 32875673 |
|   | 19 | 32866543 | 32875042 NM_177096    | chr19 | 32866538 | 32867517 |
|   | 17 | 32802267 | 32810766 NM_001009544 | chr17 | 32804663 | 32805477 |
|   | 3  | 32791191 | 32799690 M87286       | chr3  | 32797408 | 32798003 |
|   | 4  | 32561563 | 32570062 NM_007521    | chr4  | 32568336 | 32569196 |
|   | 19 | 32530055 | 32538572 NM_011292    | chr19 | 32537845 | 32538461 |
|   | 5  | 32407115 | 32415614 NM_008037    | chr5  | 32408957 | 32409707 |
|   | 9  | 32288434 | 32296933 NM_008026    | chr9  | 32293460 | 32294132 |
|   | 15 | 32285853 | 32294352 BC065137     | chr15 | 32285856 | 32286483 |
|   | 17 | 32265803 | 32274362 NM_024442    | chr17 | 32272536 | 32273485 |
|   | 15 | 32115876 | 32124375 NM_020503    | chr15 | 32122024 | 32122656 |
|   | 16 | 32013549 | 32025233 NM_025892    | chr16 | 32019434 | 32020092 |
|   | 16 | 32016973 | 32025478 NM_024464    | chr16 | 32019434 | 32020092 |
|   | 6  | 31974448 | 31982964 NM_029587    | chr6  | 31976868 | 31977453 |
|   | 9  | 31951765 | 31960264 NM_177379    | chr9  | 31955340 | 31956009 |
|   | 5  | 31884549 | 31893065 NM_025796    | chr5  | 31888119 | 31889079 |
|   | 11 | 31859633 | 31868142 NM_026262    | chr11 | 31865755 | 31866383 |
|   | 14 | 31831514 | 31840013 BC061072     | chr14 | 31838803 | 31839574 |

|    |          |          |              |       |          |          |
|----|----------|----------|--------------|-------|----------|----------|
| 14 | 31814490 | 31822989 | NM_026253    | chr14 | 31819581 | 31820223 |
| 9  | 31660139 | 31668827 | NM_013800    | chr9  | 31667704 | 31668539 |
| 2  | 31628758 | 31638527 | NM_183424    | chr2  | 31635260 | 31636027 |
| 18 | 31457539 | 31466138 | NM_009065    | chr18 | 31464444 | 31465247 |
| 11 | 31267394 | 31276061 | NM_011491    | chr11 | 31271696 | 31272370 |
| 15 | 31163014 | 31171547 | NM_146057    | chr15 | 31164863 | 31165489 |
| 1  | 31161385 | 31169892 | NM_029062    | chr1  | 31163840 | 31164844 |
| 1  | 31164658 | 31173202 | NM_027637    | chr1  | 31163840 | 31164844 |
| 7  | 31005521 | 31014020 | NM_207262    | chr7  | 31011946 | 31013052 |
| 5  | 30982145 | 30990981 | NM_023047    | chr5  | 30984490 | 30985096 |
| 12 | 30956881 | 30965380 | NM_172951    | chr12 | 30957377 | 30958153 |
| 6  | 30886646 | 30895145 | DQ534758     | chr6  | 30886476 | 30887632 |
| 7  | 30650261 | 30658777 | NM_032541    | chr7  | 30656637 | 30657662 |
| 19 | 30595403 | 30611676 | NM_001037169 | chr19 | 30605732 | 30606345 |
| 7  | 30449942 | 30458441 | NM_008085    | chr7  | 30454852 | 30455443 |
| 7  | 30454231 | 30462801 | NM_172205    | chr7  | 30454852 | 30455443 |
| 10 | 30342706 | 30351233 | BC049997     | chr10 | 30348479 | 30349061 |
| 17 | 30254879 | 30263378 | NM_172618    | chr17 | 30259736 | 30260269 |
| 3  | 30182277 | 30190776 | NM_007963    | chr3  | 30186336 | 30187250 |
| 13 | 30137955 | 30146502 | NM_153546    | chr13 | 30140667 | 30141461 |
| 2  | 29997494 | 30006464 | NM_172660    | chr2  | 30001261 | 30001846 |
| 14 | 29750055 | 29758554 | NM_008407    | chr14 | 29757483 | 29758313 |
| 14 | 29689454 | 29697953 | BC024583     | chr14 | 29693699 | 29694324 |
| 14 | 29689454 | 29697953 | BC024583     | chr14 | 29692182 | 29692766 |
| 7  | 29658154 | 29666653 | NM_178384    | chr7  | 29662830 | 29663562 |
| 14 | 29642055 | 29657124 | NM_028839    | chr14 | 29651513 | 29652474 |
| 11 | 29586947 | 29596273 | NM_194054    | chr11 | 29589418 | 29590715 |
| 14 | 29372158 | 29380712 | NM_009388    | chr14 | 29378167 | 29378681 |
| 11 | 29374594 | 29383093 | BC037020     | chr11 | 29376639 | 29377406 |
| 14 | 29317666 | 29326165 | NM_028981    | chr14 | 29319355 | 29320061 |
| 6  | 29216680 | 29226888 | NM_023516    | chr6  | 29220872 | 29221610 |
| 9  | 29158700 | 29167199 | BC023307     | chr9  | 29159266 | 29160146 |
| 2  | 28970055 | 28981496 | BC079604     | chr2  | 28980194 | 28981185 |
| 19 | 28975375 | 28983874 | AF087578     | chr19 | 28979720 | 28980562 |
| 14 | 28909268 | 28917767 | BC058783     | chr14 | 28909750 | 28910346 |
| 8  | 28828647 | 28837383 | NM_173212    | chr8  | 28831611 | 28832558 |
| 10 | 28713511 | 28722010 | BC008169     | chr10 | 28720172 | 28720811 |
| 10 | 28713511 | 28722010 | BC008169     | chr10 | 28717896 | 28718501 |
| 2  | 28659780 | 28668302 | NM_172977    | chr2  | 28666300 | 28666904 |
| 19 | 28603918 | 28612417 | AY220846     | chr19 | 28609995 | 28610756 |
| 19 | 28603918 | 28612417 | AY220846     | chr19 | 28608577 | 28609188 |
| 8  | 28483770 | 28492294 | NM_153592    | chr8  | 28488927 | 28489728 |
| 19 | 28074638 | 28083137 | NM_011265    | chr19 | 28082387 | 28082969 |
| 13 | 28017687 | 28026187 | NM_011165    | chr13 | 28025037 | 28025626 |
| 2  | 28021685 | 28030396 | NM_019498    | chr2  | 28024785 | 28025745 |
| 13 | 28017687 | 28026187 | NM_011165    | chr13 | 28018844 | 28019978 |
| 3  | 27898951 | 27907518 | NM_173182    | chr3  | 27900792 | 27901436 |

|    |          |          |              |       |          |          |
|----|----------|----------|--------------|-------|----------|----------|
| 17 | 27864115 | 27872614 | NM_001004366 | chr17 | 27870614 | 27871212 |
| 13 | 27850867 | 27859366 | NM_001045532 | chr13 | 27853759 | 27854572 |
| 14 | 27839265 | 27847920 | NM_176920    | chr14 | 27846693 | 27847329 |
| 5  | 27829680 | 27838227 | NM_028561    | chr5  | 27830606 | 27831302 |
| 13 | 27672981 | 27681501 | NM_011168    | chr13 | 27672980 | 27673692 |
| 7  | 27635691 | 27644220 | NM_028538    | chr7  | 27639586 | 27640230 |
| 5  | 27586871 | 27595370 | BC048383     | chr5  | 27594717 | 27595181 |
| 5  | 27586871 | 27595370 | BC048383     | chr5  | 27589636 | 27590558 |
| 19 | 27383685 | 27392215 | NM_183179    | chr19 | 27385894 | 27386457 |
| 7  | 27377421 | 27385920 | NM_198417    | chr7  | 27382247 | 27382993 |
| 5  | 27374180 | 27382679 | NM_207282    | chr5  | 27381998 | 27382606 |
| 5  | 27374180 | 27382679 | NM_207282    | chr5  | 27375904 | 27376964 |
| 5  | 27374180 | 27382679 | NM_207282    | chr5  | 27374632 | 27375274 |
| 7  | 27308618 | 27318595 | NM_007434    | chr7  | 27312136 | 27312822 |
| 10 | 27303760 | 27312358 | NM_008481    | chr10 | 27305584 | 27306197 |
| 8  | 27248238 | 27256754 | NM_026121    | chr8  | 27252676 | 27253312 |
| 8  | 27056559 | 27070350 | BC064447     | chr8  | 27067639 | 27068470 |
| 8  | 27060533 | 27069041 | NM_173012    | chr8  | 27067639 | 27068470 |
| 8  | 27056559 | 27070350 | BC064447     | chr8  | 27060839 | 27061494 |
| 8  | 27060533 | 27069041 | NM_173012    | chr8  | 27060839 | 27061494 |
| 16 | 26902708 | 26911207 | NM_001013761 | chr16 | 26904062 | 26904681 |
| 2  | 26891597 | 26900170 | NM_025376    | chr2  | 26892461 | 26893355 |
| 11 | 26679108 | 26687607 | BC098095     | chr11 | 26681496 | 26682342 |
| 7  | 26511682 | 26520181 | NM_013809    | chr7  | 26512512 | 26513160 |
| 9  | 26495008 | 26507261 | NM_029792    | chr9  | 26501878 | 26502730 |
| 9  | 26495008 | 26507261 | NM_029792    | chr9  | 26496663 | 26497331 |
| 5  | 26433602 | 26442101 | NM_207657    | chr5  | 26434719 | 26435660 |
| 2  | 26423801 | 26432300 | NM_026212    | chr2  | 26426620 | 26427261 |
| 5  | 26367737 | 26376290 | NM_029376    | chr5  | 26368782 | 26369920 |
| 3  | 26322340 | 26330839 | BC005523     | chr3  | 26322331 | 26323064 |
| 15 | 26247773 | 26256272 | NM_177597    | chr15 | 26255009 | 26255628 |
| 8  | 26039379 | 26047878 | NM_145949    | chr8  | 26045861 | 26046529 |
| 4  | 25797246 | 25805745 | AB015426     | chr4  | 25801999 | 25802615 |
| 19 | 25733508 | 25747302 | NM_145831    | chr19 | 25744288 | 25745002 |
| 7  | 25522791 | 25531307 | NM_028775    | chr7  | 25525702 | 25526518 |
| 2  | 25427956 | 25436455 | NM_001024616 | chr2  | 25432382 | 25433124 |
| 4  | 25369896 | 25378395 | NM_026194    | chr4  | 25370202 | 25371029 |
| 15 | 25307135 | 25315634 | NM_027395    | chr15 | 25311931 | 25312530 |
| 18 | 25306030 | 25314529 | NM_001033532 | chr18 | 25310035 | 25310617 |
| 18 | 25309132 | 25317640 | NM_001004361 | chr18 | 25310035 | 25310617 |
| 17 | 25300787 | 25309288 | NM_029624    | chr17 | 25305474 | 25306063 |
| 13 | 25273034 | 25283417 | NM_009513    | chr13 | 25281974 | 25282570 |
| 9  | 25224993 | 25233542 | NM_026189    | chr9  | 25229185 | 25229560 |
| 10 | 25125003 | 25133502 | NM_013511    | chr10 | 25129649 | 25130568 |
| 17 | 25086973 | 25100728 | NM_012034    | chr17 | 25095964 | 25096576 |
| 19 | 24936795 | 24945333 | BC094054     | chr19 | 24941376 | 24941994 |
| 18 | 24790701 | 24799200 | NM_026779    | chr18 | 24797815 | 24798636 |

|    |          |                       |       |          |          |
|----|----------|-----------------------|-------|----------|----------|
| 5  | 24751428 | 24760017 BC034185     | chr5  | 24759375 | 24759993 |
| 3  | 24518119 | 24526618 BC056958     | chr3  | 24524537 | 24525345 |
| 8  | 24517820 | 24526319 NM_031158    | chr8  | 24523205 | 24523851 |
| 8  | 24517820 | 24526319 NM_031158    | chr8  | 24520679 | 24521785 |
| 17 | 24414990 | 24429756 NM_011522    | chr17 | 24417815 | 24418599 |
| 17 | 24417874 | 24428416 NM_027988    | chr17 | 24417815 | 24418599 |
| 10 | 24399019 | 24407518 NM_008813    | chr10 | 24402641 | 24403413 |
| 18 | 24262330 | 24270847 NM_172625    | chr18 | 24267335 | 24267952 |
| 2  | 24201406 | 24209905 NM_177611    | chr2  | 24201932 | 24202534 |
| 2  | 24152868 | 24161391 NM_031167    | chr2  | 24159588 | 24160459 |
| 7  | 24151943 | 24160442 NM_199013    | chr7  | 24156868 | 24157481 |
| 2  | 24092963 | 24101907 NM_019451    | chr2  | 24095440 | 24095902 |
| 2  | 24092963 | 24101907 NM_019451    | chr2  | 24092933 | 24094023 |
| 17 | 24073646 | 24082227 NM_013855    | chr17 | 24077690 | 24078194 |
| 8  | 23994570 | 24003069 AF196476     | chr8  | 23997027 | 23997568 |
| 17 | 23976426 | 23984947 NM_007634    | chr17 | 23983028 | 23984925 |
| 2  | 23969170 | 23977695 BC119517     | chr2  | 23970604 | 23971334 |
| 13 | 23935927 | 23944426 NM_175658    | chr13 | 23937902 | 23938725 |
| 9  | 23842425 | 23850924 NM_175678    | chr9  | 23850000 | 23850589 |
| 10 | 23832733 | 23841302 NM_016797    | chr10 | 23839969 | 23840889 |
| 7  | 23815050 | 23823583 NM_021307    | chr7  | 23815067 | 23816045 |
| 10 | 23788829 | 23804950 NM_001010831 | chr10 | 23793405 | 23794200 |
| 7  | 23705871 | 23714370 NM_207619    | chr7  | 23711553 | 23712283 |
| 13 | 23697276 | 23705802 NM_010377    | chr13 | 23705452 | 23706137 |
| 13 | 23703415 | 23711917 NM_178208    | chr13 | 23705452 | 23706137 |
| 7  | 23686822 | 23695321 NM_207546    | chr7  | 23691489 | 23692985 |
| 10 | 23672563 | 23688897 NM_001010829 | chr10 | 23681190 | 23681858 |
| 7  | 23655174 | 23663673 NM_206869    | chr7  | 23661125 | 23661812 |
| 7  | 23631146 | 23639645 NM_207545    | chr7  | 23637102 | 23637733 |
| 10 | 23578273 | 23586788 NM_011704    | chr10 | 23585092 | 23585681 |
| 17 | 23554232 | 23577794 NM_027644    | chr17 | 23569374 | 23570247 |
| 11 | 23559674 | 23568668 NM_028304    | chr11 | 23567941 | 23568542 |
| 11 | 23563436 | 23571936 NM_023651    | chr11 | 23567941 | 23568542 |
| 19 | 23512920 | 23521449 NM_174857    | chr19 | 23514153 | 23515006 |
| 7  | 23361076 | 23369575 NM_030735    | chr7  | 23367789 | 23368557 |
| 11 | 23340423 | 23357018 BC030433     | chr11 | 23348271 | 23348911 |
| 13 | 23238085 | 23246584 NM_134240    | chr13 | 23242108 | 23243164 |
| 6  | 23195766 | 23204265 BC119565     | chr6  | 23196466 | 23197149 |
| 18 | 23179167 | 23190659 NM_199024    | chr18 | 23179699 | 23180572 |
| 8  | 23166691 | 23175192 NM_001007582 | chr8  | 23173478 | 23174079 |
| 13 | 23164108 | 23172607 NM_134238    | chr13 | 23168192 | 23168944 |
| 13 | 23137950 | 23146449 NM_134222    | chr13 | 23144782 | 23145390 |
| 16 | 23040565 | 23049064 NM_145480    | chr16 | 23042991 | 23043460 |
| 13 | 23035803 | 23044302 NM_134214    | chr13 | 23038798 | 23040006 |
| 13 | 23012714 | 23021213 NM_134215    | chr13 | 23016434 | 23017044 |
| 11 | 22866037 | 22874536 D17407       | chr11 | 22873204 | 22874515 |
| 13 | 22626001 | 22634500 NM_134216    | chr13 | 22629541 | 22630498 |

|   |    |          |                       |       |          |          |
|---|----|----------|-----------------------|-------|----------|----------|
|   | 8  | 22514294 | 22522795 NM_007845    | chr8  | 22517186 | 22517843 |
|   | 13 | 22476083 | 22484582 NM_134221    | chr13 | 22482398 | 22483502 |
|   | 12 | 22450725 | 22459224 NM_001004167 | chr12 | 22453785 | 22454829 |
|   | 13 | 22355811 | 22364310 NM_134220    | chr13 | 22359304 | 22360060 |
|   | 13 | 22355811 | 22364310 NM_134220    | chr13 | 22356612 | 22357467 |
|   | 10 | 22328496 | 22337065 NM_178934    | chr10 | 22334774 | 22335583 |
|   | 9  | 22137091 | 22145625 NM_028390    | chr9  | 22143785 | 22144375 |
|   | 13 | 22089343 | 22097842 NM_145850    | chr13 | 22097836 | 22098518 |
|   | 4  | 21964508 | 21973009 NM_172687    | chr4  | 21970485 | 21971104 |
|   | 19 | 21741733 | 21750232 BC032261     | chr19 | 21742074 | 21742608 |
|   | 13 | 21664287 | 21672786 NM_146541    | chr13 | 21665561 | 21666422 |
|   | 13 | 21644487 | 21652986 NM_146542    | chr13 | 21645916 | 21647085 |
|   | 10 | 21565600 | 21574099 BC070401     | chr10 | 21569580 | 21570299 |
|   | 13 | 21348395 | 21356894 NM_146533    | chr13 | 21353840 | 21354949 |
|   | 1  | 21197780 | 21206281 NM_029398    | chr1  | 21203040 | 21203730 |
|   | 2  | 21117478 | 21132850 NM_177588    | chr2  | 21119329 | 21119937 |
|   | 2  | 21052674 | 21061173 NM_001002781 | chr2  | 21057503 | 21057926 |
|   | 15 | 21050177 | 21058676 NM_001008420 | chr15 | 21053379 | 21053990 |
|   | 9  | 21035854 | 21047471 NM_145416    | chr9  | 21045977 | 21046753 |
|   | 10 | 20972635 | 20987969 NM_019702    | chr10 | 20976617 | 20977221 |
|   | 1  | 20901407 | 20909906 AF313617     | chr1  | 20906586 | 20907301 |
|   | 18 | 20886123 | 20895414 NM_019737    | chr18 | 20892871 | 20893721 |
|   | 14 | 20773831 | 20784153 NM_145459    | chr14 | 20779180 | 20779974 |
|   | 1  | 20710056 | 20718568 NM_010552    | chr1  | 20714210 | 20715266 |
|   | 15 | 20608967 | 20617475 NM_022816    | chr15 | 20610559 | 20611294 |
|   | 5  | 20565122 | 20573621 NM_011203    | chr5  | 20569886 | 20570483 |
|   | 17 | 20545248 | 20553747 NM_134197    | chr17 | 20553092 | 20553722 |
|   | 17 | 20513192 | 20521691 NM_134190    | chr17 | 20518909 | 20519822 |
|   | 18 | 20513739 | 20522344 NM_181682    | chr18 | 20518063 | 20518673 |
|   | 16 | 20497633 | 20506188 NM_182636    | chr16 | 20504064 | 20504738 |
|   | 3  | 20464303 | 20472802 NM_029706    | chr3  | 20465054 | 20465650 |
|   | 10 | 20411766 | 20420494 NM_013875    | chr10 | 20419119 | 20419690 |
|   | 18 | 20255121 | 20263783 NM_013504    | chr18 | 20262389 | 20263691 |
| X |    | 20243689 | 20252188 NM_183185    | chrX  | 20244554 | 20245204 |
|   | 18 | 20199796 | 20208515 NM_013505    | chr18 | 20200564 | 20201168 |
| X |    | 20116421 | 20124937 NM_013840    | chrX  | 20116413 | 20117189 |
|   | 9  | 19956703 | 19965202 NM_146903    | chr9  | 19961627 | 19962266 |
|   | 9  | 19956703 | 19965202 NM_146903    | chr9  | 19958877 | 19959460 |
|   | 11 | 19916630 | 19925129 BC030460     | chr11 | 19921810 | 19922942 |
|   | 3  | 19872122 | 19880621 BC002189     | chr3  | 19873458 | 19874416 |
|   | 9  | 19845163 | 19853662 NM_146559    | chr9  | 19851863 | 19852562 |
|   | 13 | 19737917 | 19746416 NM_175688    | chr13 | 19744961 | 19745770 |
|   | 9  | 19661631 | 19670130 NM_146339    | chr9  | 19668527 | 19669439 |
|   | 9  | 19632258 | 19640757 NM_146562    | chr9  | 19636965 | 19637416 |
|   | 13 | 19624609 | 19633268 NM_134065    | chr13 | 19632381 | 19633156 |
|   | 13 | 19624648 | 19633180 NM_016687    | chr13 | 19632381 | 19633156 |
|   | 16 | 19536165 | 19544664 NM_146958    | chr16 | 19540254 | 19541251 |

|    |          |          |              |       |          |          |
|----|----------|----------|--------------|-------|----------|----------|
| 9  | 19457231 | 19465730 | NM_001012265 | chr9  | 19460638 | 19461551 |
| 14 | 19442511 | 19451055 | NM_021508    | chr14 | 19443932 | 19444540 |
| 16 | 19426698 | 19435197 | NM_146935    | chr16 | 19428109 | 19428704 |
| 5  | 19413596 | 19422184 | AB029485     | chr5  | 19421098 | 19422003 |
| 16 | 19394356 | 19402855 | NM_147068    | chr16 | 19400596 | 19401304 |
| 2  | 19357392 | 19372723 | NM_018809    | chr2  | 19364290 | 19365121 |
| 10 | 19305444 | 19313943 | NM_178258    | chr10 | 19310607 | 19311013 |
| 9  | 19285831 | 19294330 | NM_146906    | chr9  | 19287456 | 19288053 |
| 8  | 19233893 | 19250068 | NM_001025351 | chr8  | 19246299 | 19246915 |
| 8  | 19233893 | 19250068 | NM_001025351 | chr8  | 19241767 | 19242359 |
| 16 | 19197805 | 19206304 | NM_146451    | chr16 | 19199048 | 19200829 |
| 8  | 19188334 | 19201182 | NM_019728    | chr8  | 19191503 | 19192208 |
| 9  | 19185317 | 19193816 | NM_146527    | chr9  | 19190431 | 19191098 |
| 9  | 19185317 | 19193816 | NM_146527    | chr9  | 19188070 | 19188533 |
| 9  | 19109256 | 19117755 | NM_146282    | chr9  | 19113834 | 19114425 |
| 1  | 19082234 | 19090735 | NM_153154    | chr1  | 19086101 | 19087261 |
| 10 | 19039949 | 19048454 | NM_053008    | chr10 | 19043245 | 19043949 |
| 16 | 18996524 | 19005063 | M94350       | chr16 | 19000429 | 19001046 |
| 16 | 18996524 | 19005063 | M94350       | chr16 | 18998602 | 18999549 |
| 9  | 18881394 | 18889896 | NM_146565    | chr9  | 18886965 | 18887581 |
| 9  | 18881394 | 18889896 | NM_146565    | chr9  | 18885577 | 18886290 |
| 9  | 18865359 | 18873858 | NM_146564    | chr9  | 18870871 | 18871983 |
| 10 | 18528487 | 18537061 | NM_022032    | chr10 | 18532651 | 18533641 |
| 9  | 18503612 | 18512111 | NM_146606    | chr9  | 18505028 | 18505946 |
| 16 | 18235507 | 18244006 | NM_138583    | chr16 | 18236480 | 18237081 |
| 16 | 17974028 | 17982527 | BC048503     | chr16 | 17975737 | 17976472 |
| 7  | 17954509 | 17963032 | NM_011964    | chr7  | 17954559 | 17955155 |
| 6  | 17581015 | 17589601 | NM_007604    | chr6  | 17582566 | 17583445 |
| 7  | 17510898 | 17519397 | NM_011963    | chr7  | 17516933 | 17517835 |
| 7  | 17510898 | 17519397 | NM_011963    | chr7  | 17516004 | 17516916 |
| 7  | 17510898 | 17519397 | NM_011963    | chr7  | 17512104 | 17512862 |
| 16 | 17487270 | 17496234 | NM_144852    | chr16 | 17491257 | 17491858 |
| 7  | 17218449 | 17227012 | NM_026087    | chr7  | 17226236 | 17226810 |
| 7  | 17218449 | 17227012 | NM_026087    | chr7  | 17224656 | 17226008 |
| 16 | 17141150 | 17149650 | NM_178922    | chr16 | 17145529 | 17146225 |
| 1  | 17080513 | 17089103 | NM_020604    | chr1  | 17083805 | 17084409 |
| 11 | 17076109 | 17084608 | AY266418     | chr11 | 17076772 | 17077364 |
| 16 | 17054542 | 17063041 | NM_026940    | chr16 | 17058143 | 17058809 |
| 16 | 17055273 | 17066792 | NM_029779    | chr16 | 17058143 | 17058809 |
| 7  | 16965204 | 16973773 | NM_025957    | chr7  | 16972610 | 16973588 |
| 7  | 16965204 | 16973773 | NM_025957    | chr7  | 16968858 | 16969817 |
| 11 | 16945587 | 16954436 | NM_029861    | chr11 | 16947817 | 16948416 |
| 12 | 16830457 | 16839078 | NM_033270    | chr12 | 16833991 | 16834606 |
| 11 | 16533611 | 16551541 | NM_024475    | chr11 | 16542907 | 16543566 |
| X  | 16066224 | 16074723 | NM_010883    | chrX  | 16071918 | 16072614 |
| 16 | 15794864 | 15803363 | NM_007679    | chr16 | 15801619 | 15802433 |
| 9  | 15622354 | 15630853 | NM_145712    | chr9  | 15625165 | 15626203 |

|          |    |          |                       |             |          |          |
|----------|----|----------|-----------------------|-------------|----------|----------|
|          | 9  | 15360050 | 15368549 NM_181816    | chr9        | 15360069 | 15360858 |
|          | 18 | 15291965 | 15300464 AY899808     | chr18       | 15298403 | 15299056 |
|          | 4  | 15186967 | 15195477 NM_181401    | chr4        | 15193083 | 15193698 |
|          | 14 | 15033569 | 15049075 NM_027695    | chr14       | 15048455 | 15049050 |
|          | 18 | 14843169 | 14851706 BC116990     | chr18       | 14844420 | 14844756 |
|          | 16 | 14814215 | 14822723 NM_025769    | chr16       | 14816630 | 14817415 |
|          | 9  | 14651778 | 14667311 NM_022888    | chr9        | 14656843 | 14657481 |
|          | 19 | 14514064 | 14522563 AF141905     | chr19       | 14514340 | 14514956 |
|          | 13 | 14399380 | 14407892 NM_008944    | chr13       | 14402375 | 14403126 |
|          | 13 | 14402642 | 14411198 NM_029271    | chr13       | 14402375 | 14403126 |
|          | 9  | 14245016 | 14254812 NM_023153    | chr9        | 14250156 | 14251227 |
|          | 9  | 14248380 | 14256879 NM_173433    | chr9        | 14250156 | 14251227 |
|          | 10 | 14207276 | 14215775 AF452721     | chr10       | 14212393 | 14213439 |
|          | 16 | 14202425 | 14210950 NM_013607    | chr16       | 14205287 | 14206274 |
|          | 10 | 14126197 | 14134696 BC080779     | chr10       | 14132751 | 14133795 |
|          | 17 | 14010132 | 14018655 NM_022315    | chr17       | 14015210 | 14015861 |
|          | 17 | 14010132 | 14018655 NM_022315    | chr17       | 14011297 | 14012123 |
| Y_random |    | 13974415 | 13982914 L04848       | chrY_random | 13980325 | 13981379 |
| Y_random |    | 13974415 | 13982914 L04848       | chrY_random | 13975889 | 13977004 |
| Y_random |    | 13974415 | 13982914 L04848       | chrY_random | 13974691 | 13975255 |
|          | 3  | 13922943 | 13931442 BC052358     | chr3        | 13930541 | 13931176 |
|          | 19 | 13841633 | 13850132 NM_146989    | chr19       | 13848017 | 13848932 |
|          | 8  | 13835850 | 13844349 NM_153093    | chr8        | 13841096 | 13841878 |
|          | 19 | 13715465 | 13723964 NM_001011832 | chr19       | 13721317 | 13722405 |
|          | 4  | 13705929 | 13714428 NM_009822    | chr4        | 13711793 | 13712424 |
|          | 19 | 13694132 | 13702631 NM_146635    | chr19       | 13699873 | 13700976 |
|          | 19 | 13680183 | 13688682 NM_146636    | chr19       | 13685950 | 13687063 |
|          | 19 | 13646325 | 13654824 NM_146291    | chr19       | 13652199 | 13653212 |
|          | 19 | 13646325 | 13654824 NM_146291    | chr19       | 13646408 | 13646998 |
|          | 19 | 13561565 | 13570064 NM_146696    | chr19       | 13569388 | 13570597 |
|          | 19 | 13531991 | 13540490 NM_001011842 | chr19       | 13537962 | 13539056 |
|          | 19 | 13519035 | 13527534 NM_146690    | chr19       | 13526899 | 13527950 |
|          | 19 | 13519035 | 13527534 NM_146690    | chr19       | 13524407 | 13524793 |
|          | 17 | 13495435 | 13504141 NM_022311    | chr17       | 13497461 | 13498485 |
|          | 3  | 13448214 | 13456713 NM_178631    | chr3        | 13454440 | 13455040 |
|          | 5  | 13396790 | 13408167 NM_009152    | chr5        | 13406870 | 13407725 |
|          | 8  | 13399058 | 13407577 NM_011881    | chr8        | 13403933 | 13404681 |
|          | 19 | 13378803 | 13387302 NM_001011841 | chr19       | 13380273 | 13381058 |
|          | 7  | 13336178 | 13352766 NM_175250    | chr7        | 13347362 | 13348167 |
|          | 7  | 13336178 | 13352766 NM_175250    | chr7        | 13346276 | 13346898 |
|          | 19 | 13211177 | 13219676 NM_146689    | chr19       | 13212604 | 13213328 |
|          | 13 | 13183244 | 13191743 BC003212     | chr13       | 13188501 | 13189253 |
|          | 9  | 13174534 | 13183138 BC127147     | chr9        | 13181738 | 13182334 |
|          | 14 | 13115380 | 13123879 NM_147027    | chr14       | 13117003 | 13117668 |
|          | 19 | 13092847 | 13101346 NM_146700    | chr19       | 13096959 | 13097549 |
|          | 18 | 13003584 | 13012549 AB017026     | chr18       | 13004960 | 13005567 |
|          | 19 | 12984827 | 12993326 NM_146701    | chr19       | 12986040 | 12986894 |



|          |          |          |              |             |          |          |
|----------|----------|----------|--------------|-------------|----------|----------|
| 19       | 12966381 | 12974880 | NM_146703    | chr19       | 12967662 | 12968568 |
| 18       | 12878524 | 12890158 | NM_027687    | chr18       | 12884784 | 12885850 |
| 19       | 12830152 | 12838651 | NM_170786    | chr19       | 12832412 | 12833054 |
| 10       | 12774986 | 12783606 | NM_009538    | chr10       | 12781234 | 12781861 |
| 19       | 12735198 | 12755712 | NM_146698    | chr19       | 12741050 | 12742103 |
| 1        | 12697743 | 12706258 | NM_172294    | chr1        | 12698918 | 12699504 |
| 17       | 12578760 | 12587259 | BC009123     | chr17       | 12585927 | 12586715 |
| 10       | 12549426 | 12557925 | NM_011682    | chr10       | 12551155 | 12551774 |
| 17       | 12516552 | 12525196 | NM_009202    | chr17       | 12522453 | 12522953 |
| 15       | 12491578 | 12500077 | BC115886     | chr15       | 12498381 | 12498995 |
| 19       | 12483356 | 12497481 | NM_019540    | chr19       | 12496286 | 12496873 |
| 19       | 12483356 | 12497481 | NM_019540    | chr19       | 12489471 | 12490603 |
| 14       | 12458143 | 12466642 | NM_177624    | chr14       | 12461331 | 12462156 |
| 8        | 12390321 | 12398820 | NM_009233    | chr8        | 12396654 | 12397731 |
| 13       | 12392558 | 12401065 | NM_033268    | chr13       | 12396589 | 12397234 |
| 13       | 12392558 | 12401065 | NM_033268    | chr13       | 12393961 | 12394555 |
| 18       | 12377395 | 12385922 | NM_008720    | chr18       | 12384362 | 12385292 |
| 17       | 12348446 | 12357062 | NM_011395    | chr17       | 12352683 | 12353302 |
| 19       | 12344089 | 12352594 | NM_207626    | chr19       | 12350465 | 12351219 |
| 19       | 12270613 | 12279112 | NM_146414    | chr19       | 12276844 | 12277590 |
| 19       | 12270613 | 12279112 | NM_146414    | chr19       | 12270585 | 12271064 |
| 19       | 12185220 | 12193719 | NM_146682    | chr19       | 12186837 | 12187442 |
| 19       | 12156393 | 12172682 | NM_146809    | chr19       | 12169642 | 12170236 |
| Y_random | 12127745 | 12137642 | BC100413     | chrY_random | 12134681 | 12136198 |
| Y_random | 12127745 | 12137642 | BC100413     | chrY_random | 12132796 | 12134443 |
| Y_random | 12127745 | 12137642 | BC100413     | chrY_random | 12131034 | 12131630 |
| 4        | 12096457 | 12105144 | NM_026558    | chr4        | 12098356 | 12098942 |
| Y_random | 12059277 | 12069118 | BC100414     | chrY_random | 12068282 | 12069210 |
| Y_random | 12059277 | 12069118 | BC100414     | chrY_random | 12066501 | 12067325 |
| Y_random | 12059277 | 12069118 | BC100414     | chrY_random | 12064878 | 12065992 |
| Y_random | 12059277 | 12069118 | BC100414     | chrY_random | 12063127 | 12064143 |
| 11       | 11925475 | 11933974 | BC016111     | chr11       | 11928540 | 11929413 |
| 8        | 11676215 | 11684722 | NM_024271    | chr8        | 11682021 | 11682661 |
| 4        | 11625604 | 11635453 | NM_010276    | chr4        | 11633828 | 11634494 |
| 4        | 11625604 | 11635453 | NM_010276    | chr4        | 11631827 | 11632902 |
| 4        | 11625604 | 11635453 | NM_010276    | chr4        | 11627548 | 11628453 |
| 2        | 11617296 | 11626163 | NM_133836    | chr2        | 11621207 | 11621962 |
| Y_random | 11608280 | 11616797 | NM_001017393 | chrY_random | 11615565 | 11618198 |
| Y_random | 11608280 | 11616797 | NM_001017393 | chrY_random | 11614083 | 11615218 |
| Y_random | 11608280 | 11616797 | NM_001017393 | chrY_random | 11612119 | 11613089 |
| 2        | 11554703 | 11563261 | NM_008367    | chr2        | 11559724 | 11560342 |
| 1        | 11393326 | 11401825 | NM_177173    | chr1        | 11395769 | 11396786 |
| Y_random | 11349402 | 11359374 | NM_023546    | chrY_random | 11358100 | 11359207 |
| Y_random | 11349402 | 11359374 | NM_023546    | chrY_random | 11354773 | 11355459 |
| Y_random | 11349402 | 11359374 | NM_023546    | chrY_random | 11350737 | 11352069 |
| 19       | 11330678 | 11339194 | NM_007641    | chr19       | 11333419 | 11333925 |
| 4        | 11309021 | 11320619 | NM_194055    | chr4        | 11312989 | 11313586 |

|          |    |          |          |              |             |          |          |
|----------|----|----------|----------|--------------|-------------|----------|----------|
|          | 10 | 11293447 | 11301958 | NM_013898    | chr10       | 11299999 | 11300859 |
| Y_random |    | 11275195 | 11283694 | NM_001017394 | chrY_random | 11280624 | 11281690 |
| Y_random |    | 11275195 | 11283694 | NM_001017394 | chrY_random | 11277104 | 11279051 |
| Y_random |    | 11275195 | 11283694 | NM_001017394 | chrY_random | 11275350 | 11275951 |
|          | 7  | 11266129 | 11274628 | NM_134233    | chr7        | 11272227 | 11273302 |
|          | 7  | 11266129 | 11274628 | NM_134233    | chr7        | 11269995 | 11270696 |
|          | 7  | 11266129 | 11274628 | NM_134233    | chr7        | 11267509 | 11268558 |
|          | 4  | 11178837 | 11187376 | NM_178112    | chr4        | 11180072 | 11180819 |
|          | 10 | 10974683 | 10983182 | BC037691     | chr10       | 10975713 | 10976577 |
|          | 12 | 10923772 | 10932304 | BC108372     | chr12       | 10929761 | 10930391 |
|          | 12 | 10923772 | 10932304 | BC108372     | chr12       | 10924311 | 10925325 |
| X        |    | 10450183 | 10484020 | BC049545     | chrX        | 10482883 | 10483765 |
| X        |    | 10450183 | 10484020 | BC049545     | chrX        | 10476858 | 10477419 |
| X        |    | 10450183 | 10484020 | BC049545     | chrX        | 10473691 | 10474252 |
| X        |    | 10450183 | 10484020 | BC049545     | chrX        | 10463958 | 10464751 |
| X        |    | 10450183 | 10484020 | BC049545     | chrX        | 10461021 | 10461582 |
| X        |    | 10450183 | 10484020 | BC049545     | chrX        | 10457582 | 10458417 |
|          | 3  | 10177255 | 10185754 | NM_011598    | chr3        | 10184990 | 10185714 |
|          | 10 | 10117530 | 10126029 | NM_172547    | chr10       | 10124275 | 10124887 |
|          | 15 | 10115963 | 10124988 | NM_011169    | chr15       | 10120839 | 10121476 |
|          | 18 | 9952006  | 9960677  | NM_153552    | chr18       | 9956039  | 9956891  |
| X        |    | 9636075  | 9644618  | NM_019634    | chrX        | 9643536  | 9644141  |
|          | 1  | 9580481  | 9589218  | NM_178399    | chr1        | 9585932  | 9586558  |
|          | 17 | 9510532  | 9519053  | NM_026226    | chr17       | 9511646  | 9512824  |
|          | 7  | 9502480  | 9510979  | NM_134228    | chr7        | 9508215  | 9508940  |
|          | 7  | 9453881  | 9462380  | NM_145842    | chr7        | 9454683  | 9455708  |
| X        |    | 9403318  | 9411825  | NM_008769    | chrX        | 9407510  | 9408121  |
| X        |    | 9371173  | 9379697  | NM_011285    | chrX        | 9375729  | 9376330  |
|          | 7  | 9315704  | 9324203  | NM_134229    | chr7        | 9318683  | 9319277  |
|          | 13 | 9161607  | 9170106  | BC051459     | chr13       | 9161946  | 9163036  |
|          | 7  | 9147598  | 9156244  | NM_134230    | chr7        | 9155021  | 9155618  |
|          | 12 | 8993900  | 9002399  | NM_172470    | chr12       | 8993973  | 8994918  |
|          | 19 | 8832041  | 8840540  | NM_025791    | chr19       | 8837726  | 8838339  |
|          | 17 | 8633919  | 8642418  | NM_011866    | chr17       | 8636947  | 8638513  |
|          | 12 | 8622575  | 8631074  | NM_177802    | chr12       | 8628381  | 8629133  |
|          | 12 | 8622575  | 8631074  | NM_177802    | chr12       | 8625582  | 8626202  |
|          | 7  | 8197677  | 8206176  | NM_198961    | chr7        | 8201194  | 8201837  |
|          | 7  | 8197677  | 8206176  | NM_198961    | chr7        | 8199951  | 8200957  |
|          | 19 | 8196528  | 8205027  | NM_001013820 | chr19       | 8197002  | 8197676  |
|          | 7  | 8137398  | 8145897  | NM_009493    | chr7        | 8139643  | 8141521  |
| X        |    | 7954650  | 7963149  | NM_199319    | chrX        | 7958086  | 7959125  |
|          | 7  | 7953991  | 7962519  | BC071238     | chr7        | 7955693  | 7956962  |
|          | 19 | 7671469  | 7680226  | NM_019516    | chr19       | 7675495  | 7676097  |
|          | 19 | 7673614  | 7682133  | NM_025731    | chr19       | 7675495  | 7676097  |
|          | 6  | 7640681  | 7649199  | NM_012055    | chr6        | 7645078  | 7645751  |
|          | 7  | 7593143  | 7601643  | NM_009489    | chr7        | 7599189  | 7600417  |
|          | 3  | 7593910  | 7602500  | NM_008371    | chr3        | 7594795  | 7595682  |

|   |    |         |         |              |       |         |         |
|---|----|---------|---------|--------------|-------|---------|---------|
| X |    | 7564264 | 7575343 | NM_026492    | chrX  | 7569870 | 7571173 |
|   | 9  | 7458141 | 7466640 | NM_032006    | chr9  | 7464387 | 7465463 |
|   | 10 | 7410196 | 7418775 | NM_011835    | chr10 | 7411630 | 7412435 |
|   | 3  | 7343677 | 7352242 | NM_008862    | chr3  | 7349508 | 7350168 |
|   | 9  | 7341374 | 7349920 | NM_008605    | chr9  | 7345389 | 7346079 |
|   | 2  | 7311354 | 7319853 | AF090696     | chr2  | 7318164 | 7318765 |
|   | 2  | 7311354 | 7319853 | AF090696     | chr2  | 7315406 | 7316266 |
|   | 9  | 7266514 | 7275013 | NM_008607    | chr9  | 7273526 | 7274161 |
| X |    | 7029265 | 7043783 | NM_145737    | chrX  | 7035282 | 7036139 |
|   | 18 | 7002255 | 7010754 | NM_177595    | chr18 | 7010301 | 7010729 |
|   | 14 | 6884122 | 6892621 | NM_145458    | chr14 | 6886952 | 6887604 |
|   | 14 | 6866246 | 6874763 | NM_025938    | chr14 | 6866493 | 6867134 |
|   | 18 | 6759203 | 6767710 | NM_181070    | chr18 | 6759908 | 6760765 |
| X |    | 6728647 | 6745316 | NM_054039    | chrX  | 6736884 | 6737534 |
|   | 18 | 6488336 | 6496855 | NM_027497    | chr18 | 6493659 | 6494339 |
|   | 10 | 6370924 | 6379423 | NM_172308    | chr10 | 6373872 | 6374615 |
|   | 19 | 6357943 | 6366444 | NM_011750    | chr19 | 6362765 | 6363402 |
|   | 15 | 6358021 | 6366520 | BC006588     | chr15 | 6359583 | 6360198 |
|   | 15 | 6241064 | 6249563 | NM_001008702 | chr15 | 6244903 | 6245516 |
|   | 5  | 5787092 | 5795628 | BC006722     | chr5  | 5793717 | 5794390 |
|   | 11 | 5735293 | 5743799 | NM_017401    | chr11 | 5741594 | 5742230 |
|   | 4  | 5645496 | 5653995 | BC055683     | chr4  | 5646408 | 5647183 |
|   | 7  | 5611598 | 5620097 | NM_030738    | chr7  | 5615631 | 5616348 |
|   | 19 | 5607186 | 5616035 | NM_178637    | chr19 | 5609726 | 5610338 |
|   | 1  | 5572574 | 5581137 | NM_011011    | chr1  | 5579472 | 5580498 |
| X |    | 5569621 | 5578120 | NM_001040459 | chrX  | 5574011 | 5575101 |
|   | 4  | 5565326 | 5573825 | NM_173426    | chr4  | 5567847 | 5568703 |
|   | 7  | 5485130 | 5493629 | NM_207544    | chr7  | 5486564 | 5487526 |
|   | 7  | 5404933 | 5414532 | NM_030742    | chr7  | 5410170 | 5410883 |
|   | 7  | 5404933 | 5414532 | NM_030742    | chr7  | 5406701 | 5407492 |
|   | 7  | 5404933 | 5414532 | NM_030742    | chr7  | 5406052 | 5406650 |
|   | 5  | 5383704 | 5392209 | NM_011074    | chr5  | 5389965 | 5390780 |
|   | 17 | 5372695 | 5381249 | NM_175349    | chr17 | 5372715 | 5373716 |
| X |    | 5216983 | 5225736 | NM_021431    | chrX  | 5223953 | 5224661 |
|   | 6  | 5141309 | 5149824 | NM_011134    | chr6  | 5142450 | 5143495 |
|   | 18 | 4914565 | 4923064 | NM_178046    | chr18 | 4920761 | 4921712 |
|   | 1  | 4481035 | 4492838 | NM_011441    | chr1  | 4484063 | 4484689 |
|   | 10 | 4418141 | 4426712 | NM_019958    | chr10 | 4419002 | 4419931 |
|   | 14 | 4277097 | 4285596 | NM_025940    | chr14 | 4285261 | 4286008 |
|   | 14 | 4277097 | 4285596 | NM_025940    | chr14 | 4277073 | 4278059 |
|   | 8  | 4232828 | 4242604 | NM_011944    | chr8  | 4240357 | 4240947 |
|   | 13 | 4226986 | 4235485 | NM_001013785 | chr13 | 4233428 | 4234300 |
|   | 8  | 4214813 | 4223312 | NM_207203    | chr8  | 4218015 | 4218616 |
|   | 2  | 4064143 | 4072643 | NM_172475    | chr2  | 4068677 | 4069323 |
|   | 11 | 4054371 | 4062896 | NM_026175    | chr11 | 4061004 | 4061635 |
|   | 11 | 4057797 | 4066296 | NM_177616    | chr11 | 4061004 | 4061635 |
|   | 13 | 3942096 | 3950595 | NM_031250    | chr13 | 3941709 | 3942251 |

|          |    |         |                      |             |         |         |
|----------|----|---------|----------------------|-------------|---------|---------|
|          | 6  | 3915855 | 3924359 NM_009364    | chr6        | 3923553 | 3924147 |
|          | 8  | 3851787 | 3860308 NM_130905    | chr8        | 3855862 | 3856662 |
|          | 8  | 3851787 | 3860308 NM_130905    | chr8        | 3852647 | 3853262 |
|          | 8  | 3851787 | 3860308 NM_130905    | chr8        | 3851799 | 3852478 |
|          | 8  | 3746431 | 3754984 NM_133238    | chr8        | 3753038 | 3754032 |
|          | 1  | 3659080 | 3667579 NM_001011874 | chr1        | 3663885 | 3664480 |
|          | 16 | 3653331 | 3662020 NM_148924    | chr16       | 3653705 | 3654395 |
|          | 5  | 3596072 | 3604571 NM_027777    | chr5        | 3601967 | 3602853 |
|          | 5  | 3599907 | 3608414 NM_172991    | chr5        | 3601967 | 3602853 |
|          | 9  | 3526354 | 3534853 NM_001033322 | chr9        | 3534448 | 3535122 |
|          | 17 | 3511696 | 3520195 NM_146074    | chr17       | 3518711 | 3519670 |
|          | 2  | 3427515 | 3436086 NM_015765    | chr2        | 3435400 | 3436011 |
|          | 2  | 3427515 | 3436086 NM_015765    | chr2        | 3432241 | 3433006 |
|          | 2  | 3247364 | 3255874 NM_001013376 | chr2        | 3252465 | 3253205 |
|          | 11 | 3090915 | 3099463 BC046305     | chr11       | 3097688 | 3098373 |
|          | 11 | 3096395 | 3105264 NM_023743    | chr11       | 3097688 | 3098373 |
|          | 11 | 3090915 | 3099463 BC046305     | chr11       | 3095386 | 3097086 |
|          | 11 | 3096395 | 3105264 NM_023743    | chr11       | 3095386 | 3097086 |
|          | 11 | 3090915 | 3099463 BC046305     | chr11       | 3092804 | 3094310 |
|          | 11 | 3042349 | 3050848 BC048950     | chr11       | 3048315 | 3048872 |
|          | 11 | 3042349 | 3050848 BC048950     | chr11       | 3042470 | 3043393 |
|          | 5  | 3004565 | 3013064 NM_134232    | chr5        | 3010033 | 3010782 |
|          | 5  | 3004565 | 3013064 NM_134232    | chr5        | 3007704 | 3008644 |
|          | 5  | 3004565 | 3013064 NM_134232    | chr5        | 3006115 | 3007177 |
| Y_random |    | 2540325 | 2550162 L04849       | chrY_random | 2540213 | 2541173 |
| Y        |    | 1946029 | 1954528 NM_011564    | chrY        | 1952584 | 1953280 |
| Y        |    | 1946029 | 1954528 NM_011564    | chrY        | 1951344 | 1952219 |
| Y        |    | 620499  | 629011 NM_012008     | chrY        | 622965  | 623615  |

| gene overlap percent | region overlap percent | length(bps) | probes in region | p-value(region) |            |
|----------------------|------------------------|-------------|------------------|-----------------|------------|
| 0.120813             |                        | 1           | 1028             | 28              | 0.0159072  |
| 0.107801             |                        | 1           | 919              | 18              | 0.0234724  |
| 0.0764989            |                        | 1           | 652              | 17              | 0.0366078  |
| 0.107765             |                        | 1           | 916              | 24              | 0.0331827  |
| 0.0548119            |                        | 1           | 647              | 18              | 0.0423015  |
| 0.114706             |                        | 1           | 975              | 28              | 0.0214244  |
| 0.0731765            |                        | 1           | 622              | 18              | 0.0477393  |
| 0.0731506            |                        | 1           | 622              | 18              | 0.0477393  |
| 0.0612269            |                        | 1           | 1037             | 22              | 0.0289808  |
| 0.120947             |                        | 1           | 1037             | 22              | 0.0289808  |
| 0.0831282            |                        | 1           | 709              | 16              | 0.0235165  |
| 0.0929412            |                        | 1           | 790              | 19              | 0.0496813  |
| 0.0894477            |                        | 1           | 779              | 13              | 0.0152981  |
| 0.0560835            |                        | 1           | 844              | 18              | 0.0276125  |
| 0.0429929            |                        | 1           | 647              | 14              | 0.0369432  |
| 0.0708235            |                        | 1           | 602              | 16              | 0.0317703  |
| 0.0707059            |                        | 1           | 601              | 16              | 0.0477216  |
| 0.0697733            |                        | 1           | 1102             | 26              | 0.0219099  |
| 0.107176             |                        | 1           | 911              | 25              | 0.0161544  |
| 0.0849412            |                        | 1           | 722              | 12              | 0.0407126  |
| 0.171176             |                        | 1           | 1455             | 39              | 0.00578203 |
| 0.0977647            |                        | 1           | 831              | 23              | 0.0330061  |
| 0.0627059            |                        | 1           | 533              | 15              | 0.0498755  |
| 0.0754118            |                        | 1           | 641              | 13              | 0.0455765  |
| 0.132246             |                        | 1           | 1127             | 31              | 0.0296781  |
| 0.0812941            |                        | 1           | 691              | 20              | 0.0497873  |
| 0.0713454            |                        | 1           | 613              | 13              | 0.0388853  |
| 0.0735605            |                        | 1           | 626              | 16              | 0.0493459  |
| 0.0825763            |                        | 1           | 709              | 20              | 0.0485426  |
| 0.0971765            |                        | 1           | 826              | 23              | 0.0308346  |
| 0.0964728            |                        | 1           | 826              | 23              | 0.0308346  |
| 0.0909182            |                        | 1           | 909              | 14              | 0.0326972  |
| 0.0998002            |                        | 1           | 849              | 24              | 0.038232   |
| 0.0974118            | 0.953917               |             | 868              | 24              | 0.023084   |
| 0.0831765            |                        | 1           | 707              | 20              | 0.0333592  |
| 0.0726204            |                        | 1           | 618              | 15              | 0.0484102  |
| 0.0726185            |                        | 1           | 619              | 17              | 0.0455853  |
| 0.0109993            | 0.224344               |             | 419              | 12              | 0.0282657  |
| 0.0801177            |                        | 1           | 681              | 17              | 0.0460179  |
| 0.102824             |                        | 1           | 874              | 24              | 0.0223866  |
| 0.122235             |                        | 1           | 1039             | 27              | 0.0340654  |
| 0.145412             |                        | 1           | 1236             | 33              | 0.031938   |
| 0.0794118            |                        | 1           | 675              | 18              | 0.0152981  |
| 0.125647             |                        | 1           | 1068             | 27              | 0.021601   |

|           |          |      |    |           |
|-----------|----------|------|----|-----------|
| 0.0511111 | 1        | 437  | 11 | 0.0486044 |
| 0.094     | 1        | 799  | 22 | 0.0330767 |
| 0.0841812 | 1        | 786  | 20 | 0.0312936 |
| 0.009603  | 0.118326 | 693  | 14 | 0.0129412 |
| 0.0644974 | 1        | 779  | 22 | 0.0320263 |
| 0.0619308 | 1        | 748  | 18 | 0.0200385 |
| 0.0651999 | 1        | 812  | 23 | 0.0453823 |
| 0.109765  | 1        | 933  | 26 | 0.0275772 |
| 0.0975951 | 1        | 836  | 23 | 0.0474833 |
| 0.0943993 | 1        | 836  | 23 | 0.0474833 |
| 0.0857568 | 1        | 749  | 18 | 0.0432549 |
| 0.0725456 | 1        | 617  | 14 | 0.0411363 |
| 0.0623047 | 1        | 638  | 18 | 0.0488339 |
| 0.0461769 | 1        | 741  | 19 | 0.0212125 |
| 0.0702512 | 1        | 618  | 17 | 0.0440935 |
| 0.0490086 | 1        | 744  | 21 | 0.0310376 |
| 0.0947405 | 1        | 807  | 23 | 0.031885  |
| 0.0948589 | 1        | 810  | 23 | 0.0317526 |
| 0.0392295 | 1        | 611  | 16 | 0.0455942 |
| 0.0516212 | 1        | 804  | 23 | 0.0210007 |
| 0.0582986 | 1        | 908  | 24 | 0.0313642 |
| 0.0716684 | 1        | 619  | 12 | 0.0409686 |
| 0.0856471 | 1        | 728  | 15 | 0.0497166 |
| 0.0838824 | 1        | 713  | 18 | 0.0434314 |
| 0.067248  | 1        | 617  | 11 | 0.0233223 |
| 0.0869667 | 1        | 744  | 21 | 0.0328825 |
| 0.110824  | 1        | 942  | 27 | 0.0331121 |
| 0.084108  | 1        | 751  | 21 | 0.030967  |
| 0.0842835 | 1        | 717  | 15 | 0.0323087 |
| 0.0365839 | 1        | 625  | 18 | 0.0310641 |
| 0.10383   | 1        | 892  | 25 | 0.0294133 |
| 0.0931765 | 1        | 792  | 23 | 0.0300136 |
| 0.101647  | 1        | 864  | 24 | 0.0253085 |
| 0.0587889 | 1        | 500  | 14 | 0.0462033 |
| 0.0976471 | 1        | 830  | 22 | 0.0491428 |
| 0.0727059 | 1        | 618  | 13 | 0.0468389 |
| 0.0623529 | 1        | 530  | 14 | 0.0456471 |
| 0.116118  | 1        | 987  | 25 | 0.0237284 |
| 0.138941  | 1        | 1181 | 29 | 0.0100104 |
| 0.0677181 | 1        | 614  | 17 | 0.0442259 |
| 0.0667058 | 0.856712 | 663  | 18 | 0.0499197 |
| 0.0591859 | 1        | 663  | 18 | 0.0499197 |
| 0.0766882 | 1        | 653  | 19 | 0.0332621 |
| 0.0582932 | 1        | 653  | 19 | 0.0332621 |
| 0.0838619 | 1        | 714  | 21 | 0.0494783 |
| 0.0600588 | 1        | 715  | 20 | 0.0410568 |
| 0.0760436 | 1        | 725  | 17 | 0.0313642 |

|           |          |      |    |            |
|-----------|----------|------|----|------------|
| 0.0543657 | 1        | 792  | 23 | 0.0457531  |
| 0.12656   | 1        | 1176 | 31 | 0.0235607  |
| 0.0872941 | 1        | 742  | 21 | 0.0431578  |
| 0.0748235 | 1        | 636  | 18 | 0.0389559  |
| 0.0830558 | 1        | 848  | 17 | 0.0328119  |
| 0.0819311 | 1        | 706  | 20 | 0.0476951  |
| 0.0880745 | 1        | 757  | 19 | 0.0475451  |
| 0.0351539 | 1        | 475  | 10 | 0.0340566  |
| 0.0658676 | 1        | 610  | 12 | 0.0435727  |
| 0.0798824 | 1        | 679  | 15 | 0.0282481  |
| 0.0990087 | 1        | 849  | 20 | 0.0117318  |
| 0.0367874 | 0.687868 | 849  | 20 | 0.0117318  |
| 0.0727899 | 1        | 634  | 13 | 0.0480217  |
| 0.0689936 | 1        | 593  | 17 | 0.0481012  |
| 0.0754318 | 1        | 642  | 18 | 0.039821   |
| 0.0753698 | 1        | 642  | 18 | 0.039821   |
| 0.0643876 | 1        | 614  | 11 | 0.0366607  |
| 0.110118  | 1        | 936  | 25 | 0.0220512  |
| 0.0522187 | 1        | 446  | 10 | 0.0405448  |
| 0.0715126 | 0.977492 | 622  | 16 | 0.0292544  |
| 0.100588  | 1        | 855  | 22 | 0.00396356 |
| 0.0567059 | 1        | 482  | 14 | 0.0429106  |
| 0.0905882 | 1        | 770  | 22 | 0.0269151  |
| 0.211765  | 1        | 1800 | 50 | 0.0151039  |
| 0.0985882 | 1        | 838  | 23 | 0.0300577  |
| 0.0885218 | 1        | 1163 | 32 | 0.0339948  |
| 0.13596   | 1        | 1163 | 32 | 0.0339948  |
| 0.126706  | 1        | 1077 | 30 | 0.0118289  |
| 0.167882  | 1        | 1427 | 35 | 0.0141593  |
| 0.0775294 | 1        | 659  | 14 | 0.00818312 |
| 0.0997647 | 1        | 848  | 24 | 0.0203563  |
| 0.0863529 | 1        | 734  | 18 | 0.0308257  |
| 0.100941  | 1        | 858  | 22 | 0.0443407  |
| 0.164235  | 1        | 1396 | 39 | 0.0125527  |
| 0.129647  | 1        | 1102 | 30 | 0.0161897  |
| 0.0615294 | 1        | 523  | 15 | 0.0432637  |
| 0.139882  | 1        | 1189 | 34 | 0.0235872  |
| 0.182118  | 1        | 1548 | 37 | 0.0167105  |
| 0.0935294 | 1        | 795  | 20 | 0.00844794 |
| 0.0825882 | 1        | 702  | 20 | 0.0457707  |
| 0.0714118 | 1        | 608  | 17 | 0.0458943  |
| 0.0724348 | 1        | 617  | 18 | 0.0325559  |
| 0.112758  | 1        | 966  | 27 | 0.022007   |
| 0.170538  | 1        | 1461 | 36 | 0.0220688  |
| 0.102603  | 1        | 879  | 20 | 0.00997511 |
| 0.0927363 | 1        | 789  | 21 | 0.0223425  |
| 0.0803529 | 1        | 683  | 19 | 0.0473332  |

|           |          |      |    |            |
|-----------|----------|------|----|------------|
| 0.0539485 | 1        | 677  | 17 | 0.0442259  |
| 0.129176  | 1        | 1098 | 29 | 0.022113   |
| 0.118588  | 1        | 1008 | 24 | 0.0127381  |
| 0.0888235 | 1        | 755  | 19 | 0.00664713 |
| 0.0491738 | 1        | 619  | 16 | 0.0480924  |
| 0.119082  | 1        | 1499 | 38 | 0.0125969  |
| 0.0759049 | 1        | 648  | 14 | 0.0425399  |
| 0.0870588 | 1        | 740  | 21 | 0.0453735  |
| 0.0937647 | 1        | 797  | 18 | 0.0344362  |
| 0.0513516 | 1        | 644  | 18 | 0.0474215  |
| 0.016951  | 0.236025 | 644  | 18 | 0.0474215  |
| 0.0784706 | 1        | 667  | 19 | 0.0493724  |
| 0.0831279 | 1        | 708  | 14 | 0.0231016  |
| 0.106748  | 1        | 908  | 23 | 0.031373   |
| 0.0741176 | 1        | 630  | 18 | 0.04811    |
| 0.104353  | 1        | 887  | 25 | 0.0493017  |
| 0.0710363 | 1        | 608  | 17 | 0.0428665  |
| 0.0337166 | 1        | 607  | 15 | 0.0415247  |
| 0.045745  | 1        | 673  | 20 | 0.04811    |
| 0.0643345 | 1        | 800  | 23 | 0.0407302  |
| 0.0697079 | 1        | 599  | 17 | 0.0484984  |
| 0.0505311 | 1        | 628  | 18 | 0.0311788  |
| 0.0768235 | 1        | 653  | 18 | 0.0456471  |
| 0.123412  | 1        | 1049 | 30 | 0.0317614  |
| 0.0709412 | 1        | 603  | 17 | 0.0473509  |
| 0.0724706 | 1        | 616  | 18 | 0.0465122  |
| 0.0858824 | 1        | 730  | 20 | 0.0194117  |
| 0.0979885 | 1        | 833  | 23 | 0.0247436  |
| 0.111411  | 1        | 990  | 26 | 0.0432284  |
| 0.0724706 | 1        | 616  | 12 | 0.0430695  |
| 0.0770588 | 1        | 655  | 17 | 0.0450557  |
| 0.0948235 | 1        | 806  | 17 | 0.032759   |
| 0.105412  | 1        | 896  | 23 | 0.029069   |
| 0.0506055 | 1        | 794  | 19 | 0.0323617  |
| 0.0452518 | 1        | 710  | 20 | 0.0376847  |
| 0.0835294 | 1        | 710  | 20 | 0.0376847  |
| 0.0828584 | 1        | 916  | 25 | 0.0338359  |
| 0.107655  | 1        | 924  | 26 | 0.0169842  |
| 0.0723005 | 1        | 616  | 17 | 0.0487279  |
| 0.0896714 | 1        | 764  | 21 | 0.0362723  |
| 0.0832941 | 1        | 708  | 20 | 0.0214509  |
| 0.0862109 | 1        | 1121 | 27 | 0.0237372  |
| 0.0609412 | 1        | 518  | 15 | 0.048878   |
| 0.129176  | 1        | 1098 | 29 | 0.0188379  |
| 0.0445283 | 1        | 732  | 18 | 0.0282128  |
| 0.0712663 | 1        | 1129 | 22 | 0.00991331 |
| 0.0762005 | 1        | 649  | 16 | 0.0469007  |



|           |          |      |    |            |
|-----------|----------|------|----|------------|
| 0.0772016 | 1        | 661  | 19 | 0.0203828  |
| 0.0941094 | 1        | 802  | 23 | 0.0244611  |
| 0.102118  | 1        | 868  | 14 | 0.0191734  |
| 0.08      | 1        | 680  | 17 | 0.0489133  |
| 0.0744706 | 1        | 633  | 17 | 0.0467594  |
| 0.0241597 | 0.305761 | 677  | 13 | 0.0493547  |
| 0.0660598 | 1        | 566  | 16 | 0.0223425  |
| 0.0745882 | 1        | 634  | 15 | 0.0460002  |
| 0.0710101 | 1        | 606  | 10 | 0.0419837  |
| 0.0810747 | 1        | 691  | 19 | 0.0333239  |
| 0.120718  | 1        | 1029 | 25 | 0.0303049  |
| 0.0696471 | 1        | 592  | 14 | 0.0497608  |
| 0.0739196 | 1        | 638  | 13 | 0.0474038  |
| 0.111022  | 1        | 1112 | 31 | 0.0281422  |
| 0.0469412 | 1        | 399  | 11 | 0.04796    |
| 0.044     | 1        | 374  | 10 | 0.0448174  |
| 0.0411779 | 1        | 351  | 10 | 0.0490899  |
| 0.0722085 | 1        | 615  | 15 | 0.0457531  |
| 0.0872941 | 1        | 742  | 20 | 0.0234547  |
| 0.0782353 | 1        | 665  | 19 | 0.0490104  |
| 0.0770588 | 1        | 655  | 18 | 0.040483   |
| 0.0731765 | 1        | 622  | 12 | 0.0497519  |
| 0.0698111 | 1        | 595  | 17 | 0.0330061  |
| 0.0723529 | 1        | 615  | 17 | 0.0351071  |
| 0.0576471 | 1        | 490  | 13 | 0.0480659  |
| 0.0797546 | 1        | 1066 | 30 | 0.00861567 |
| 0.0738285 | 1        | 657  | 15 | 0.0381879  |
| 0.0915063 | 1        | 780  | 22 | 0.00254233 |
| 0.0737647 | 1        | 627  | 18 | 0.0398122  |
| 0.119412  | 1        | 1015 | 17 | 0.0260589  |
| 0.0859046 | 1        | 735  | 21 | 0.0425575  |
| 0.0555471 | 1        | 1093 | 31 | 0.00793595 |
| 0.0310515 | 1        | 611  | 17 | 0.0430695  |
| 0.0629412 | 1        | 535  | 15 | 0.0475804  |
| 0.0700326 | 1        | 602  | 10 | 0.049699   |
| 0.0943929 | 1        | 803  | 22 | 0.041816   |
| 0.0747059 | 1        | 635  | 18 | 0.0326177  |
| 0.0758824 | 1        | 645  | 18 | 0.0271623  |
| 0.0359951 | 1        | 618  | 12 | 0.0448174  |
| 0.0774292 | 1        | 659  | 18 | 0.0179993  |
| 0.101046  | 1        | 860  | 22 | 0.034445   |
| 0.0994412 | 1        | 872  | 19 | 0.0336682  |
| 0.061083  | 1        | 520  | 14 | 0.033986   |
| 0.0276471 | 0.389073 | 604  | 17 | 0.0451263  |
| 0.0765882 | 1        | 651  | 19 | 0.0475716  |
| 0.0708235 | 1        | 602  | 16 | 0.0464858  |
| 0.0793331 | 1        | 709  | 20 | 0.0305609  |

|            |          |      |    |            |
|------------|----------|------|----|------------|
| 0.104424   | 1        | 923  | 22 | 0.00874808 |
| 0.072067   | 1        | 637  | 11 | 0.0269151  |
| 0.0529678  | 1        | 456  | 13 | 0.0463357  |
| 0.0733966  | 1        | 626  | 18 | 0.0481807  |
| 0.0697647  | 1        | 593  | 17 | 0.049134   |
| 0.135557   | 1        | 1154 | 31 | 0.0235165  |
| 0.0704815  | 1        | 606  | 17 | 0.0461856  |
| 0.0702353  | 1        | 597  | 15 | 0.0499108  |
| 0.160941   | 1        | 1368 | 32 | 0.00346039 |
| 0.110803   | 1        | 959  | 20 | 0.0233312  |
| 0.0848562  | 1        | 729  | 20 | 0.0458943  |
| 0.131059   | 1        | 1114 | 27 | 0.00594975 |
| 0.129412   | 0.990991 | 1110 | 26 | 0.0167282  |
| 0.0758824  | 1        | 645  | 16 | 0.0438993  |
| 0.0530588  | 1        | 451  | 13 | 0.0461503  |
| 0.0721176  | 1        | 613  | 16 | 0.0467859  |
| 0.0789412  | 1        | 671  | 14 | 0.0402006  |
| 0.0800608  | 1        | 685  | 19 | 0.0400858  |
| 0.0811765  | 1        | 690  | 15 | 0.0316114  |
| 0.0752789  | 1        | 641  | 18 | 0.0379407  |
| 0.0805882  | 1        | 685  | 19 | 0.0287866  |
| 0.105294   | 1        | 895  | 24 | 0.0229163  |
| 0.0818824  | 1        | 696  | 20 | 0.0451263  |
| 0.0838824  | 1        | 713  | 20 | 0.0457266  |
| 0.0743529  | 1        | 632  | 17 | 0.0476422  |
| 0.13       | 1        | 1105 | 30 | 0.0176021  |
| 0.0782273  | 1        | 669  | 19 | 0.0400858  |
| 0.0687769  | 1        | 591  | 13 | 0.0495666  |
| 0.122      | 1        | 1037 | 27 | 0.0117583  |
| 0.0878824  | 1        | 747  | 17 | 0.00278067 |
| 0.14       | 1        | 1190 | 30 | 0.0151039  |
| 0.0742353  | 1        | 631  | 18 | 0.0486397  |
| 0.118118   | 1        | 1004 | 27 | 0.0129588  |
| 0.0805882  | 1        | 685  | 19 | 0.0462739  |
| 0.0724706  | 1        | 616  | 17 | 0.0316908  |
| 0.0601176  | 0.51773  | 987  | 21 | 0.0335976  |
| 0.0702353  | 1        | 597  | 17 | 0.0432549  |
| 0.056129   | 1        | 522  | 10 | 0.0371021  |
| 0.0808875  | 1        | 689  | 19 | 0.0426723  |
| 0.0700935  | 1        | 600  | 14 | 0.0239667  |
| 0.118288   | 1        | 1009 | 23 | 0.00718561 |
| 0.00799812 | 0.102256 | 665  | 17 | 0.0485426  |
| 0.0782353  | 1        | 665  | 17 | 0.0485426  |
| 0.0891765  | 1        | 758  | 20 | 0.022572   |
| 0.0455467  | 1        | 741  | 13 | 0.0441288  |
| 0.0680257  | 1        | 604  | 15 | 0.0167282  |
| 0.0689048  | 1        | 587  | 17 | 0.0399799  |

|           |   |      |    |           |
|-----------|---|------|----|-----------|
| 0.0776288 | 1 | 660  | 19 | 0.0314701 |
| 0.0684706 | 1 | 582  | 13 | 0.0424516 |
| 0.109176  | 1 | 928  | 21 | 0.0291132 |
| 0.146941  | 1 | 1249 | 33 | 0.0320263 |
| 0.0503509 | 1 | 452  | 12 | 0.048366  |
| 0.0406407 | 1 | 680  | 19 | 0.0388676 |
| 0.0685423 | 1 | 631  | 16 | 0.0442965 |
| 0.135891  | 1 | 1162 | 32 | 0.0161985 |
| 0.114862  | 1 | 980  | 26 | 0.0204622 |
| 0.0979902 | 1 | 1175 | 32 | 0.0164104 |
| 0.110588  | 1 | 940  | 27 | 0.0232782 |
| 0.0703529 | 1 | 598  | 17 | 0.0490546 |
| 0.104528  | 1 | 891  | 25 | 0.0408097 |
| 0.0716551 | 1 | 610  | 12 | 0.035469  |
| 0.119412  | 1 | 1015 | 27 | 0.0212567 |
| 0.0878111 | 1 | 755  | 21 | 0.0389559 |
| 0.0708235 | 1 | 602  | 17 | 0.0410568 |
| 0.0788235 | 1 | 670  | 18 | 0.0331209 |
| 0.134499  | 1 | 1154 | 26 | 0.015404  |
| 0.126336  | 1 | 1076 | 30 | 0.0323176 |
| 0.108262  | 1 | 929  | 20 | 0.04555   |
| 0.0717478 | 1 | 610  | 10 | 0.0495136 |
| 0.108941  | 1 | 926  | 26 | 0.016428  |
| 0.0639609 | 1 | 851  | 24 | 0.0343303 |
| 0.0712941 | 1 | 606  | 17 | 0.0490546 |
| 0.0507003 | 1 | 695  | 19 | 0.0118024 |
| 0.0877894 | 1 | 747  | 21 | 0.0337388 |
| 0.0506337 | 1 | 795  | 20 | 0.0498049 |
| 0.072629  | 1 | 618  | 12 | 0.0447114 |
| 0.103176  | 1 | 877  | 21 | 0.0317967 |
| 0.113882  | 1 | 968  | 27 | 0.0165869 |
| 0.0730823 | 1 | 625  | 14 | 0.0440935 |
| 0.0766628 | 1 | 657  | 18 | 0.0407302 |
| 0.0766799 | 1 | 655  | 19 | 0.0340831 |
| 0.0412817 | 1 | 353  | 10 | 0.0482689 |
| 0.0701858 | 1 | 597  | 17 | 0.0489486 |
| 0.0914648 | 1 | 778  | 22 | 0.0234724 |
| 0.0588028 | 1 | 500  | 12 | 0.0335269 |
| 0.083314  | 1 | 718  | 20 | 0.0290867 |
| 0.0795127 | 1 | 718  | 20 | 0.0290867 |
| 0.0734258 | 1 | 625  | 18 | 0.0494695 |
| 0.0931298 | 1 | 793  | 22 | 0.0292015 |
| 0.0735294 | 1 | 625  | 12 | 0.0327678 |
| 0.0930588 | 1 | 791  | 22 | 0.0319203 |
| 0.0761176 | 1 | 647  | 12 | 0.0411451 |
| 0.0722594 | 1 | 615  | 17 | 0.029431  |
| 0.0640862 | 1 | 654  | 18 | 0.0464593 |

|           |   |      |    |           |
|-----------|---|------|----|-----------|
| 0.0944327 | 1 | 804  | 23 | 0.0477216 |
| 0.0917647 | 1 | 780  | 22 | 0.0339948 |
| 0.0757647 | 1 | 644  | 18 | 0.0496813 |
| 0.102353  | 1 | 870  | 17 | 0.0435021 |
| 0.0694683 | 1 | 648  | 16 | 0.0440141 |
| 0.0616972 | 1 | 831  | 18 | 0.0454971 |
| 0.0714118 | 1 | 607  | 17 | 0.0475804 |
| 0.0702489 | 1 | 604  | 15 | 0.0373581 |
| 0.0674818 | 1 | 574  | 16 | 0.0486573 |
| 0.0708235 | 1 | 602  | 17 | 0.044579  |
| 0.0828048 | 1 | 705  | 20 | 0.0356632 |
| 0.0488235 | 1 | 415  | 12 | 0.0459738 |
| 0.0745743 | 1 | 635  | 18 | 0.0476245 |
| 0.0921486 | 1 | 784  | 21 | 0.0203916 |
| 0.0850588 | 1 | 723  | 19 | 0.0434314 |
| 0.0884253 | 1 | 835  | 22 | 0.0166664 |
| 0.0717225 | 1 | 610  | 17 | 0.0408097 |
| 0.0695106 | 1 | 598  | 17 | 0.039512  |
| 0.115059  | 1 | 978  | 18 | 0.0328737 |
| 0.0730588 | 1 | 621  | 13 | 0.0449674 |
| 0.0635294 | 1 | 540  | 14 | 0.0455589 |
| 0.0724706 | 1 | 616  | 18 | 0.0387617 |
| 0.0937647 | 1 | 797  | 22 | 0.0233312 |
| 0.107529  | 1 | 914  | 20 | 0.0331562 |
| 0.119765  | 1 | 1018 | 28 | 0.0314701 |
| 0.0853969 | 1 | 1007 | 29 | 0.0135591 |
| 0.140824  | 1 | 1197 | 33 | 0.0124998 |
| 0.0964706 | 1 | 820  | 23 | 0.0286453 |
| 0.0902353 | 1 | 767  | 22 | 0.048366  |
| 0.0775623 | 1 | 784  | 16 | 0.0169842 |
| 0.0864383 | 1 | 747  | 21 | 0.0325824 |
| 0.0927546 | 1 | 795  | 21 | 0.0435903 |
| 0.132684  | 1 | 1131 | 28 | 0.0150333 |
| 0.109608  | 1 | 932  | 23 | 0.0336064 |
| 0.0691824 | 1 | 594  | 14 | 0.0485337 |
| 0.0818707 | 1 | 709  | 15 | 0.0461238 |
| 0.0365081 | 1 | 634  | 18 | 0.0475362 |
| 0.0710588 | 1 | 604  | 17 | 0.0495666 |
| 0.0780333 | 1 | 665  | 19 | 0.0320704 |
| 0.0832066 | 1 | 711  | 17 | 0.0310729 |
| 0.0833138 | 1 | 711  | 17 | 0.0310729 |
| 0.0842353 | 1 | 716  | 20 | 0.0489222 |
| 0.0993323 | 1 | 848  | 18 | 0.0438287 |
| 0.120941  | 1 | 1028 | 22 | 0.0271535 |
| 0.0526681 | 1 | 607  | 17 | 0.0442083 |
| 0.0791021 | 1 | 740  | 21 | 0.0490104 |
| 0.0858768 | 1 | 740  | 21 | 0.0490104 |

|            |         |      |    |            |
|------------|---------|------|----|------------|
| 0.134824   | 1       | 1146 | 21 | 0.00555251 |
| 0.0919027  | 1       | 782  | 18 | 0.0338183  |
| 0.0689412  | 1       | 586  | 17 | 0.0407655  |
| 0.0961176  | 1       | 817  | 23 | 0.0415777  |
| 0.113137   | 1       | 962  | 21 | 0.0341096  |
| 0.0745516  | 1       | 636  | 18 | 0.0496195  |
| 0.0765252  | 1       | 651  | 16 | 0.0306227  |
| 0.0721176  | 1       | 613  | 16 | 0.0422839  |
| 0.0954225  | 1       | 813  | 18 | 0.0490281  |
| 0.0815789  | 1       | 713  | 18 | 0.0471831  |
| 0.0523529  | 1       | 445  | 10 | 0.048878   |
| 0.00587061 | 0.11236 | 445  | 10 | 0.048878   |
| 0.0703107  | 1       | 602  | 17 | 0.0414805  |
| 0.0744093  | 1       | 633  | 18 | 0.0444289  |
| 0.0832355  | 1       | 709  | 13 | 0.0496195  |
| 0.0987059  | 1       | 839  | 24 | 0.0261648  |
| 0.0849562  | 1       | 746  | 21 | 0.046062   |
| 0.0777647  | 1       | 661  | 16 | 0.0298459  |
| 0.0519632  | 1       | 446  | 12 | 0.0454088  |
| 0.0625882  | 1       | 532  | 15 | 0.0487633  |
| 0.0690952  | 1       | 588  | 16 | 0.0417983  |
| 0.111521   | 1       | 967  | 27 | 0.0351954  |
| 0.122217   | 1       | 1043 | 24 | 0.0335534  |
| 0.0485158  | 1       | 608  | 17 | 0.0229251  |
| 0.102471   | 1       | 871  | 25 | 0.0296428  |
| 0.119564   | 1       | 1020 | 26 | 0.0215833  |
| 0.101993   | 1       | 870  | 24 | 0.0313995  |
| 0.0376411  | 1       | 637  | 17 | 0.0454088  |
| 0.0877706  | 1       | 750  | 21 | 0.0421691  |
| 0.125647   | 1       | 1068 | 24 | 0.0309317  |
| 0.030755   | 1       | 664  | 14 | 0.0222542  |
| 0.0815199  | 1       | 723  | 13 | 0.0211243  |
| 0.0707736  | 1       | 602  | 17 | 0.0398033  |
| 0.0527574  | 1       | 883  | 20 | 0.0146007  |
| 0.115765   | 1       | 984  | 28 | 0.0234547  |
| 0.0727059  | 1       | 618  | 17 | 0.0468212  |
| 0.0611968  | 1       | 587  | 13 | 0.0313465  |
| 0.0754118  | 1       | 641  | 15 | 0.0453294  |
| 0.0765522  | 1       | 651  | 12 | 0.0492576  |
| 0.135647   | 1       | 1153 | 32 | 0.0166752  |
| 0.104252   | 1       | 890  | 21 | 0.0332886  |
| 0.0576742  | 1       | 614  | 14 | 0.0442965  |
| 0.0707059  | 1       | 601  | 15 | 0.0338271  |
| 0.0629404  | 1       | 661  | 15 | 0.0321852  |
| 0.0802704  | 1       | 843  | 24 | 0.0290867  |
| 0.0664801  | 1       | 594  | 15 | 0.0465652  |
| 0.0695294  | 1       | 591  | 17 | 0.0484102  |

|           |          |      |    |           |
|-----------|----------|------|----|-----------|
| 0.112353  | 1        | 955  | 27 | 0.0283717 |
| 0.0829412 | 1        | 705  | 19 | 0.0306139 |
| 0.0803529 | 1        | 683  | 19 | 0.0462209 |
| 0.135882  | 1        | 1155 | 33 | 0.0156689 |
| 0.101765  | 1        | 865  | 25 | 0.0482601 |
| 0.117529  | 1        | 999  | 29 | 0.0248407 |
| 0.0648998 | 1        | 813  | 22 | 0.0212125 |
| 0.086     | 1        | 731  | 18 | 0.0495136 |
| 0.136118  | 1        | 1157 | 32 | 0.0116965 |
| 0.121412  | 1        | 1032 | 29 | 0.048878  |
| 0.114588  | 1        | 974  | 27 | 0.0320174 |
| 0.140588  | 1        | 1195 | 33 | 0.0308875 |
| 0.10101   | 1        | 870  | 24 | 0.0290867 |
| 0.0854118 | 1        | 726  | 20 | 0.0480041 |
| 0.0774118 | 1        | 658  | 19 | 0.0413658 |
| 0.0874447 | 1        | 771  | 22 | 0.0363076 |
| 0.067143  | 1        | 592  | 12 | 0.0438287 |
| 0.0885475 | 1        | 951  | 27 | 0.0313642 |
| 0.0296151 | 0.909774 | 532  | 15 | 0.0319468 |
| 0.0706656 | 1        | 602  | 15 | 0.0454088 |
| 0.054     | 1        | 459  | 12 | 0.0323617 |
| 0.0723807 | 1        | 619  | 13 | 0.0462651 |
| 0.0406294 | 1        | 346  | 10 | 0.0464593 |
| 0.150012  | 1        | 1279 | 30 | 0.0343391 |
| 0.0720439 | 1        | 669  | 17 | 0.0458943 |
| 0.100329  | 1        | 855  | 17 | 0.0325559 |
| 0.0408325 | 1        | 618  | 17 | 0.0463887 |
| 0.11235   | 1        | 957  | 25 | 0.0234459 |
| 0.0423808 | 1        | 361  | 10 | 0.0477128 |
| 0.0964365 | 1        | 866  | 24 | 0.0226956 |
| 0.0632299 | 1        | 666  | 17 | 0.0366872 |
| 0.0552598 | 1        | 602  | 17 | 0.0440229 |
| 0.0934118 | 1        | 794  | 28 | 0.0447114 |
| 0.143765  | 1        | 1222 | 26 | 0.046371  |
| 0.0752322 | 1        | 640  | 14 | 0.0345245 |
| 0.0445958 | 1        | 694  | 19 | 0.0199767 |
| 0.0810588 | 1        | 689  | 18 | 0.0421338 |
| 0.0690588 | 1        | 587  | 14 | 0.0464416 |
| 0.0731765 | 0.992025 | 627  | 17 | 0.0301637 |
| 0.0725882 | 1        | 617  | 17 | 0.0385057 |
| 0.0854118 | 1        | 726  | 20 | 0.0406861 |
| 0.0579285 | 1        | 533  | 15 | 0.048163  |
| 0.0762363 | 1        | 649  | 11 | 0.0365548 |
| 0.118235  | 1        | 1005 | 29 | 0.0305079 |
| 0.0334511 | 1        | 502  | 12 | 0.0453117 |
| 0.0774892 | 1        | 737  | 19 | 0.0158542 |
| 0.0595923 | 1        | 994  | 28 | 0.0237725 |

|           |   |      |    |            |
|-----------|---|------|----|------------|
| 0.164353  | 1 | 1397 | 39 | 0.0231105  |
| 0.0705882 | 1 | 600  | 11 | 0.0369167  |
| 0.0804706 | 1 | 684  | 17 | 0.0481012  |
| 0.0987059 | 1 | 839  | 23 | 0.0317438  |
| 0.126     | 1 | 1071 | 31 | 0.0341802  |
| 0.0712941 | 1 | 606  | 17 | 0.0473067  |
| 0.116824  | 1 | 993  | 28 | 0.0234018  |
| 0.118824  | 1 | 1010 | 28 | 0.0211861  |
| 0.0787059 | 1 | 669  | 17 | 0.0485867  |
| 0.0612389 | 1 | 522  | 15 | 0.0305521  |
| 0.117412  | 1 | 998  | 28 | 0.0331209  |
| 0.102941  | 1 | 875  | 25 | 0.0322823  |
| 0.103765  | 1 | 882  | 25 | 0.0381349  |
| 0.0852941 | 1 | 725  | 17 | 0.0297046  |
| 0.0816446 | 1 | 697  | 20 | 0.0424074  |
| 0.0787059 | 1 | 669  | 17 | 0.0472714  |
| 0.107412  | 1 | 913  | 26 | 0.0383379  |
| 0.0845882 | 1 | 719  | 20 | 0.0490546  |
| 0.0691765 | 1 | 588  | 17 | 0.0419837  |
| 0.0705882 | 1 | 600  | 17 | 0.0489928  |
| 0.0831765 | 1 | 707  | 20 | 0.0452587  |
| 0.0862353 | 1 | 733  | 21 | 0.0435639  |
| 0.104353  | 1 | 887  | 21 | 0.0345245  |
| 0.127059  | 1 | 1080 | 28 | 0.028663   |
| 0.0928235 | 1 | 789  | 19 | 0.0327678  |
| 0.0715965 | 1 | 609  | 12 | 0.0495842  |
| 0.0752941 | 1 | 640  | 14 | 0.0484984  |
| 0.0631765 | 1 | 537  | 15 | 0.0247259  |
| 0.0837835 | 1 | 729  | 17 | 0.023543   |
| 0.0945882 | 1 | 804  | 23 | 0.0446496  |
| 0.0479491 | 1 | 595  | 12 | 0.0482513  |
| 0.0554724 | 1 | 667  | 18 | 0.0355838  |
| 0.0925882 | 1 | 787  | 21 | 0.0298282  |
| 0.140139  | 1 | 1193 | 20 | 0.00909235 |
| 0.0732941 | 1 | 623  | 18 | 0.0328737  |
| 0.0811765 | 1 | 690  | 19 | 0.0455942  |
| 0.0575778 | 1 | 522  | 13 | 0.0423633  |
| 0.119126  | 1 | 1080 | 30 | 0.0127646  |
| 0.0782353 | 1 | 665  | 19 | 0.0437492  |
| 0.123294  | 1 | 1048 | 29 | 0.0165869  |
| 0.0750588 | 1 | 638  | 18 | 0.0320086  |
| 0.0809412 | 1 | 688  | 20 | 0.0458943  |
| 0.109647  | 1 | 932  | 27 | 0.0283717  |
| 0.150364  | 1 | 1279 | 35 | 0.0337123  |
| 0.0970018 | 1 | 825  | 23 | 0.040589   |
| 0.12      | 1 | 1020 | 23 | 0.0340125  |
| 0.0708251 | 1 | 612  | 15 | 0.0467064  |

|           |       |      |    |            |
|-----------|-------|------|----|------------|
| 0.0321057 | 1     | 503  | 11 | 0.0395032  |
| 0.0685882 | 1     | 583  | 15 | 0.0493459  |
| 0.0725882 | 1     | 617  | 16 | 0.0444643  |
| 0.0292734 | 1     | 834  | 24 | 0.0308257  |
| 0.0412077 | 1     | 722  | 16 | 0.0292015  |
| 0.0251981 | 1     | 617  | 18 | 0.0480394  |
| 0.0702353 | 1     | 597  | 17 | 0.0464593  |
| 0.0370486 | 1     | 593  | 11 | 0.0304903  |
| 0.0456471 | 1     | 388  | 11 | 0.0460973  |
| 0.0962667 | 1     | 820  | 20 | 0.0285482  |
| 0.0695294 | 1     | 591  | 17 | 0.0476422  |
| 0.0704706 | 1     | 599  | 15 | 0.0473862  |
| 0.0704706 | 1     | 599  | 15 | 0.0358927  |
| 0.03595   | 1     | 610  | 17 | 0.0499815  |
| 0.0777647 | 1     | 661  | 13 | 0.0384086  |
| 0.0536574 | 1     | 457  | 13 | 0.0467064  |
| 0.069508  | 1     | 592  | 17 | 0.0490546  |
| 0.0890588 | 1     | 757  | 21 | 0.0343921  |
| 0.0684706 | 0.485 | 1200 | 34 | 0.00892463 |
| 0.0363965 | 1     | 604  | 17 | 0.0453117  |
| 0.108235  | 1     | 920  | 26 | 0.0332621  |
| 0.0349904 | 1     | 492  | 14 | 0.0332974  |
| 0.0667214 | 1     | 569  | 10 | 0.0455324  |
| 0.119882  | 1     | 1019 | 18 | 0.0272064  |
| 0.0692941 | 1     | 589  | 17 | 0.0484366  |
| 0.0714118 | 1     | 607  | 17 | 0.0496813  |
| 0.0952493 | 1     | 810  | 17 | 0.0131001  |
| 0.0754118 | 1     | 641  | 18 | 0.0350453  |
| 0.0574969 | 1     | 747  | 19 | 0.0487456  |
| 0.0644537 | 1     | 899  | 21 | 0.02334    |
| 0.0776471 | 1     | 660  | 19 | 0.0427959  |
| 0.0474908 | 1     | 617  | 18 | 0.0495136  |
| 0.0709412 | 1     | 603  | 17 | 0.0478982  |
| 0.0788235 | 1     | 670  | 19 | 0.0488604  |
| 0.0791765 | 1     | 673  | 12 | 0.0455324  |
| 0.0665382 | 1     | 587  | 15 | 0.0465211  |
| 0.104984  | 1     | 1049 | 29 | 0.01679    |
| 0.117647  | 1     | 1000 | 26 | 0.0240462  |
| 0.0797647 | 1     | 678  | 19 | 0.0331827  |
| 0.0911765 | 1     | 775  | 22 | 0.0390795  |
| 0.0406389 | 1     | 603  | 17 | 0.0480394  |
| 0.149412  | 1     | 1270 | 32 | 0.00818312 |
| 0.140118  | 1     | 1191 | 27 | 0.0328472  |
| 0.05662   | 1     | 591  | 14 | 0.0458943  |
| 0.105765  | 1     | 899  | 25 | 0.0218481  |
| 0.0683871 | 1     | 583  | 16 | 0.0376053  |
| 0.0712941 | 1     | 606  | 17 | 0.0450557  |



|           |   |      |    |            |
|-----------|---|------|----|------------|
| 0.0712941 | 1 | 606  | 17 | 0.0450557  |
| 0.0712862 | 1 | 608  | 16 | 0.0474656  |
| 0.0372295 | 1 | 609  | 18 | 0.032909   |
| 0.112235  | 1 | 954  | 27 | 0.0277714  |
| 0.131514  | 1 | 1118 | 32 | 0.0236489  |
| 0.0788143 | 1 | 670  | 19 | 0.0381526  |
| 0.0812617 | 1 | 693  | 19 | 0.0342596  |
| 0.0525528 | 1 | 597  | 17 | 0.0389559  |
| 0.0672692 | 1 | 588  | 10 | 0.0462209  |
| 0.0713532 | 1 | 609  | 14 | 0.0440229  |
| 0.126235  | 1 | 1073 | 27 | 0.0197207  |
| 0.0883529 | 1 | 751  | 21 | 0.0344362  |
| 0.0984973 | 1 | 839  | 23 | 0.0325736  |
| 0.0453184 | 1 | 711  | 20 | 0.047907   |
| 0.0510588 | 1 | 434  | 10 | 0.0377553  |
| 0.0570041 | 1 | 634  | 18 | 0.0480394  |
| 0.0709412 | 1 | 603  | 16 | 0.0379407  |
| 0.14625   | 1 | 1244 | 32 | 0.00566727 |
| 0.0237502 | 1 | 620  | 10 | 0.0345245  |
| 0.089124  | 1 | 758  | 21 | 0.0281598  |
| 0.0701116 | 1 | 597  | 13 | 0.0401652  |
| 0.0764533 | 1 | 651  | 14 | 0.0495136  |
| 0.0775294 | 1 | 659  | 14 | 0.0318762  |
| 0.0327869 | 1 | 592  | 17 | 0.0285394  |
| 0.0743529 | 1 | 632  | 16 | 0.0451175  |
| 0.0416471 | 1 | 354  | 10 | 0.0434226  |
| 0.0745882 | 1 | 634  | 14 | 0.0353631  |
| 0.0685882 | 1 | 583  | 15 | 0.0111227  |
| 0.0765882 | 1 | 651  | 19 | 0.0378083  |
| 0.115059  | 1 | 978  | 28 | 0.0414011  |
| 0.0722353 | 1 | 614  | 17 | 0.03772    |
| 0.0717877 | 1 | 614  | 17 | 0.03772    |
| 0.0504276 | 1 | 802  | 19 | 0.0233576  |
| 0.0308664 | 1 | 704  | 20 | 0.0366695  |
| 0.0717931 | 1 | 633  | 16 | 0.0260854  |
| 0.0978491 | 1 | 878  | 24 | 0.0217863  |
| 0.0699803 | 1 | 604  | 12 | 0.0495401  |
| 0.0698644 | 1 | 603  | 12 | 0.0469448  |
| 0.0951765 | 1 | 809  | 22 | 0.0337388  |
| 0.0722353 | 1 | 614  | 14 | 0.0468212  |
| 0.0769412 | 1 | 654  | 14 | 0.023031   |
| 0.0744706 | 1 | 633  | 14 | 0.0320263  |
| 0.0789721 | 1 | 673  | 19 | 0.0412863  |
| 0.0562405 | 1 | 479  | 14 | 0.0318674  |
| 0.0703317 | 1 | 600  | 17 | 0.0490546  |
| 0.0802353 | 1 | 682  | 14 | 0.0414894  |
| 0.0898824 | 1 | 764  | 17 | 0.0207888  |

|           |          |      |    |           |
|-----------|----------|------|----|-----------|
| 0.0415294 | 0.836493 | 422  | 11 | 0.0491605 |
| 0.0979793 | 1        | 834  | 22 | 0.022263  |
| 0.0335661 | 1        | 745  | 20 | 0.0306933 |
| 0.0696008 | 1        | 680  | 18 | 0.0375082 |
| 0.0941176 | 1        | 800  | 22 | 0.0335269 |
| 0.0776466 | 1        | 875  | 22 | 0.0199061 |
| 0.0698824 | 1        | 594  | 17 | 0.049134  |
| 0.0734127 | 1        | 629  | 14 | 0.0165957 |
| 0.117606  | 1        | 1000 | 22 | 0.0168782 |
| 0.0710845 | 1        | 605  | 17 | 0.0493282 |
| 0.127743  | 1        | 1135 | 32 | 0.0154217 |
| 0.0863529 | 1        | 734  | 16 | 0.0240109 |
| 0.0446934 | 1        | 814  | 19 | 0.0232341 |
| 0.106824  | 1        | 908  | 26 | 0.0230575 |
| 0.102663  | 1        | 875  | 15 | 0.0400681 |
| 0.0770449 | 1        | 681  | 18 | 0.0297841 |
| 0.0780678 | 1        | 682  | 19 | 0.0464063 |
| 0.0910588 | 1        | 774  | 22 | 0.0160396 |
| 0.0704706 | 1        | 599  | 17 | 0.0470331 |
| 0.0703529 | 1        | 598  | 17 | 0.0321763 |
| 0.0775294 | 1        | 659  | 16 | 0.0460179 |
| 0.104093  | 1        | 885  | 26 | 0.0249378 |
| 0.0870588 | 1        | 740  | 21 | 0.0484719 |
| 0.0625954 | 1        | 861  | 19 | 0.0226691 |
| 0.0721176 | 1        | 613  | 17 | 0.0235695 |
| 0.135412  | 1        | 1151 | 26 | 0.0338094 |
| 0.0845549 | 1        | 721  | 21 | 0.0428047 |
| 0.0675501 | 1        | 576  | 12 | 0.0484278 |
| 0.0816471 | 1        | 694  | 13 | 0.0295987 |
| 0.0850368 | 1        | 728  | 21 | 0.036696  |
| 0.0841176 | 1        | 715  | 16 | 0.0396621 |
| 0.0455294 | 1        | 387  | 11 | 0.0485161 |
| 0.0721176 | 1        | 613  | 13 | 0.0434668 |
| 0.0752941 | 1        | 640  | 18 | 0.0432549 |
| 0.0569412 | 1        | 484  | 13 | 0.0357868 |
| 0.071269  | 1        | 606  | 17 | 0.0442524 |
| 0.0682112 | 1        | 580  | 13 | 0.0469978 |
| 0.0990588 | 1        | 842  | 22 | 0.0305432 |
| 0.0690986 | 1        | 591  | 16 | 0.046318  |
| 0.141078  | 1        | 1201 | 34 | 0.0230487 |
| 0.0875557 | 1        | 845  | 22 | 0.0487633 |
| 0.0695294 | 1        | 591  | 12 | 0.0497166 |
| 0.0781176 | 1        | 664  | 19 | 0.0427694 |
| 0.0354897 | 1        | 587  | 17 | 0.0259529 |
| 0.0837936 | 1        | 713  | 20 | 0.0325736 |
| 0.0733326 | 1        | 630  | 11 | 0.0426546 |
| 0.0829643 | 1        | 712  | 17 | 0.0322734 |

|           |   |      |    |           |
|-----------|---|------|----|-----------|
| 0.0777647 | 1 | 661  | 17 | 0.0422132 |
| 0.0832941 | 1 | 708  | 18 | 0.0447379 |
| 0.186147  | 1 | 1591 | 40 | 0.0331827 |
| 0.0635105 | 1 | 546  | 12 | 0.0434138 |
| 0.0715294 | 1 | 608  | 16 | 0.0429371 |
| 0.036577  | 1 | 589  | 10 | 0.0356632 |
| 0.06743   | 1 | 901  | 25 | 0.0285129 |
| 0.071017  | 1 | 604  | 10 | 0.0326001 |
| 0.070892  | 1 | 604  | 10 | 0.0326001 |
| 0.0699488 | 1 | 628  | 18 | 0.0357868 |
| 0.0703872 | 1 | 618  | 16 | 0.0471831 |
| 0.0721541 | 1 | 618  | 17 | 0.0489398 |
| 0.0922353 | 1 | 784  | 22 | 0.0338006 |
| 0.035053  | 1 | 585  | 17 | 0.0458943 |
| 0.0702353 | 1 | 597  | 14 | 0.0438552 |
| 0.0917647 | 1 | 780  | 22 | 0.0281951 |
| 0.0683529 | 1 | 581  | 16 | 0.0492135 |
| 0.0701176 | 1 | 596  | 17 | 0.0499638 |
| 0.0529262 | 1 | 813  | 17 | 0.0342331 |
| 0.0757202 | 1 | 644  | 18 | 0.0284776 |
| 0.0748235 | 1 | 636  | 18 | 0.0294045 |
| 0.0920487 | 1 | 793  | 22 | 0.0255027 |
| 0.0501176 | 1 | 426  | 10 | 0.0470066 |
| 0.0661623 | 1 | 787  | 22 | 0.0377024 |
| 0.0874118 | 1 | 743  | 21 | 0.0493547 |
| 0.0983529 | 1 | 836  | 22 | 0.0425222 |
| 0.0718693 | 1 | 629  | 18 | 0.0429371 |
| 0.0727834 | 1 | 637  | 18 | 0.0236754 |
| 0.0798824 | 1 | 679  | 19 | 0.0378701 |
| 0.0694118 | 1 | 590  | 13 | 0.0398563 |
| 0.0404875 | 1 | 382  | 11 | 0.0471213 |
| 0.0643349 | 1 | 607  | 16 | 0.0464593 |
| 0.0981176 | 1 | 834  | 23 | 0.0268004 |
| 0.0574078 | 1 | 489  | 14 | 0.0477216 |
| 0.0995651 | 1 | 847  | 24 | 0.0496548 |
| 0.0786016 | 1 | 670  | 19 | 0.0385763 |
| 0.0858936 | 1 | 780  | 22 | 0.0164104 |
| 0.0807904 | 1 | 691  | 18 | 0.0233223 |
| 0.074577  | 1 | 648  | 18 | 0.0483572 |
| 0.0705692 | 1 | 610  | 15 | 0.0489398 |
| 0.0383166 | 1 | 610  | 15 | 0.0489398 |
| 0.0934118 | 1 | 794  | 22 | 0.0482689 |
| 0.054982  | 1 | 687  | 19 | 0.031629  |
| 0.119599  | 1 | 1027 | 20 | 0.0223248 |
| 0.0724706 | 1 | 616  | 13 | 0.0411451 |
| 0.0697647 | 1 | 593  | 13 | 0.0455324 |
| 0.0763529 | 1 | 649  | 18 | 0.0494871 |

|            |           |      |    |            |
|------------|-----------|------|----|------------|
| 0.101529   | 1         | 863  | 17 | 0.00788298 |
| 0.126588   | 1         | 1076 | 28 | 0.0180346  |
| 0.0707059  | 1         | 601  | 16 | 0.0393531  |
| 0.0418644  | 1         | 697  | 20 | 0.0477128  |
| 0.140122   | 1         | 1193 | 34 | 0.0126234  |
| 0.112742   | 1         | 960  | 25 | 0.00229516 |
| 0.0764706  | 1         | 650  | 17 | 0.0275595  |
| 0.072254   | 1         | 619  | 17 | 0.0370933  |
| 0.0896471  | 1         | 762  | 21 | 0.0314525  |
| 0.0707059  | 1         | 601  | 14 | 0.0442436  |
| 0.0714867  | 1         | 615  | 17 | 0.0413217  |
| 0.0740093  | 1         | 635  | 18 | 0.0277096  |
| 0.092      | 1         | 782  | 22 | 0.0328031  |
| 0.0919351  | 1         | 782  | 22 | 0.0328031  |
| 0.117242   | 1         | 1005 | 22 | 0.0340566  |
| 0.0689048  | 1         | 587  | 11 | 0.0396268  |
| 0.13261    | 1         | 1137 | 23 | 0.0155806  |
| 0.039643   | 1         | 342  | 10 | 0.0456207  |
| 0.0694118  | 1         | 590  | 17 | 0.0492135  |
| 0.0710287  | 1         | 609  | 17 | 0.0470154  |
| 0.174588   | 1         | 1484 | 41 | 0.0147861  |
| 0.0801177  | 1         | 681  | 19 | 0.0450557  |
| 0.0943529  | 1         | 802  | 22 | 0.0143889  |
| 0.0971765  | 1         | 826  | 23 | 0.0301725  |
| 0.118706   | 1         | 1009 | 29 | 0.0229163  |
| 0.111882   | 1         | 951  | 27 | 0.01295    |
| 0.00428331 | 0.0915033 | 612  | 17 | 0.0484102  |
| 0.0332645  | 1         | 612  | 17 | 0.0484102  |
| 0.126706   | 1         | 1077 | 31 | 0.0208948  |
| 0.047192   | 1         | 563  | 14 | 0.0461062  |
| 0.13       | 1         | 1105 | 31 | 0.0223248  |
| 0.0831765  | 1         | 707  | 20 | 0.0314172  |
| 0.106353   | 1         | 904  | 25 | 0.0153952  |
| 0.101969   | 1         | 870  | 24 | 0.0161809  |
| 0.102353   | 1         | 870  | 24 | 0.0161809  |
| 0.0964592  | 1         | 820  | 23 | 0.0321499  |
| 0.209387   | 1         | 1780 | 51 | 0.0161897  |
| 0.200353   | 1         | 1703 | 43 | 0.0229163  |
| 0.0729412  | 1         | 620  | 13 | 0.0219541  |
| 0.218941   | 1         | 1861 | 52 | 0.00996628 |
| 0.155294   | 1         | 1320 | 37 | 0.00408714 |
| 0.0570884  | 1         | 689  | 12 | 0.0299077  |
| 0.0673042  | 1         | 1126 | 31 | 0.0115287  |
| 0.069675   | 1         | 596  | 17 | 0.0493724  |
| 0.0717647  | 1         | 610  | 12 | 0.015404   |
| 0.0722353  | 1         | 614  | 17 | 0.0432549  |
| 0.08       | 1         | 680  | 19 | 0.0493459  |

|           |   |      |    |            |
|-----------|---|------|----|------------|
| 0.082834  | 1 | 705  | 14 | 0.0137268  |
| 0.0990483 | 1 | 843  | 24 | 0.0342331  |
| 0.0769592 | 1 | 655  | 13 | 0.0407832  |
| 0.0822353 | 1 | 699  | 20 | 0.0382585  |
| 0.0857677 | 1 | 734  | 21 | 0.0308257  |
| 0.0535172 | 1 | 458  | 13 | 0.028919   |
| 0.0731765 | 1 | 622  | 18 | 0.0432372  |
| 0.0738824 | 1 | 628  | 18 | 0.0420014  |
| 0.0697919 | 1 | 597  | 17 | 0.0449233  |
| 0.0681176 | 1 | 579  | 16 | 0.0320616  |
| 0.127294  | 1 | 1082 | 30 | 0.0303226  |
| 0.0707059 | 1 | 601  | 17 | 0.032141   |
| 0.125412  | 1 | 1066 | 25 | 0.0338006  |
| 0.0950588 | 1 | 808  | 22 | 0.0315231  |
| 0.130706  | 1 | 1111 | 31 | 0.0164545  |
| 0.0681176 | 1 | 579  | 16 | 0.0475716  |
| 0.122353  | 1 | 1040 | 21 | 0.0330061  |
| 0.0738824 | 1 | 628  | 18 | 0.0451263  |
| 0.0691707 | 1 | 593  | 16 | 0.039      |
| 0.108588  | 1 | 923  | 26 | 0.0247259  |
| 0.0812941 | 1 | 691  | 19 | 0.0447114  |
| 0.100269  | 1 | 856  | 23 | 0.0454088  |
| 0.0907059 | 1 | 771  | 19 | 0.0495224  |
| 0.0483066 | 1 | 716  | 19 | 0.042787   |
| 0.0716471 | 1 | 609  | 17 | 0.0498755  |
| 0.0472801 | 1 | 724  | 20 | 0.0490899  |
| 0.0785882 | 1 | 668  | 19 | 0.0449145  |
| 0.132941  | 1 | 1130 | 31 | 0.0402359  |
| 0.114824  | 1 | 976  | 27 | 0.0246818  |
| 0.0727059 | 1 | 618  | 13 | 0.0387617  |
| 0.0802353 | 1 | 682  | 16 | 0.0148744  |
| 0.0945771 | 1 | 804  | 23 | 0.0312318  |
| 0.0944105 | 1 | 804  | 23 | 0.0312318  |
| 0.0758824 | 1 | 645  | 18 | 0.030605   |
| 0.0817647 | 1 | 695  | 18 | 0.0330238  |
| 0.084     | 1 | 714  | 20 | 0.0342155  |
| 0.143765  | 1 | 1222 | 34 | 0.00745043 |
| 0.127765  | 1 | 1086 | 30 | 0.0226161  |
| 0.0798824 | 1 | 679  | 19 | 0.0377553  |
| 0.0881462 | 1 | 1018 | 19 | 0.0285924  |
| 0.131882  | 1 | 1121 | 29 | 0.0151392  |
| 0.134118  | 1 | 1140 | 32 | 0.0136915  |
| 0.0490196 | 1 | 540  | 12 | 0.0487368  |
| 0.198     | 1 | 1683 | 42 | 0.0159072  |
| 0.100824  | 1 | 857  | 24 | 0.0447203  |
| 0.137627  | 1 | 1733 | 47 | 0.00755636 |
| 0.0852941 | 1 | 725  | 21 | 0.0464858  |

|            |          |      |    |           |
|------------|----------|------|----|-----------|
| 0.0885882  | 1        | 753  | 21 | 0.0426723 |
| 0.0433929  | 1        | 619  | 16 | 0.0441465 |
| 0.0714118  | 1        | 607  | 12 | 0.0471831 |
| 0.0705882  | 1        | 600  | 15 | 0.0476245 |
| 0.0694118  | 1        | 590  | 17 | 0.0480835 |
| 0.13       | 1        | 1105 | 31 | 0.0329178 |
| 0.0929412  | 1        | 790  | 23 | 0.0486397 |
| 0.0902717  | 1        | 824  | 22 | 0.0232517 |
| 0.0402657  | 1        | 594  | 14 | 0.0344803 |
| 0.0255761  | 1        | 586  | 15 | 0.0406684 |
| 0.0938824  | 1        | 798  | 21 | 0.0421338 |
| 0.100235   | 1        | 852  | 24 | 0.0331827 |
| 0.101294   | 1        | 861  | 23 | 0.0308169 |
| 0.0977647  | 1        | 831  | 21 | 0.042787  |
| 0.00704391 | 0.12605  | 476  | 10 | 0.0385145 |
| 0.134118   | 1        | 1140 | 32 | 0.021601  |
| 0.0708235  | 1        | 602  | 15 | 0.0399093 |
| 0.0690588  | 1        | 587  | 17 | 0.0473862 |
| 0.0743529  | 1        | 632  | 18 | 0.0477746 |
| 0.0708235  | 1        | 602  | 17 | 0.048878  |
| 0.0598366  | 1        | 608  | 13 | 0.0384704 |
| 0.120233   | 1        | 1034 | 29 | 0.033986  |
| 0.0711628  | 1        | 612  | 15 | 0.0438905 |
| 0.0164392  | 0.251981 | 631  | 13 | 0.0474833 |
| 0.152843   | 1        | 1301 | 33 | 0.0343303 |
| 0.0795294  | 1        | 676  | 19 | 0.0400681 |
| 0.101412   | 1        | 862  | 24 | 0.031373  |
| 0.0747192  | 1        | 652  | 17 | 0.0442877 |
| 0.132941   | 1        | 1130 | 31 | 0.0323794 |
| 0.0737474  | 1        | 627  | 13 | 0.0442877 |
| 0.0802353  | 1        | 682  | 13 | 0.0234724 |
| 0.0791173  | 1        | 674  | 19 | 0.0320881 |
| 0.0744219  | 1        | 634  | 18 | 0.0362723 |
| 0.0753831  | 1        | 1092 | 20 | 0.026562  |
| 0.0732999  | 1        | 1038 | 28 | 0.0335269 |
| 0.0701549  | 0.986799 | 606  | 13 | 0.0278773 |
| 0.0890588  | 1        | 757  | 19 | 0.0287071 |
| 0.0763529  | 1        | 649  | 18 | 0.0457972 |
| 0.0721176  | 1        | 613  | 17 | 0.045038  |
| 0.0319548  | 1        | 622  | 18 | 0.042787  |
| 0.101765   | 1        | 865  | 25 | 0.023543  |
| 0.0705882  | 1        | 600  | 17 | 0.0373669 |
| 0.0941634  | 1        | 847  | 22 | 0.0400681 |
| 0.0816937  | 1        | 710  | 20 | 0.0122438 |
| 0.0725457  | 1        | 821  | 17 | 0.0342331 |
| 0.0696471  | 1        | 592  | 16 | 0.0490722 |
| 0.053371   | 1        | 604  | 12 | 0.0471743 |

|           |   |      |    |           |
|-----------|---|------|----|-----------|
| 0.0591109 | 1 | 617  | 17 | 0.0401476 |
| 0.0389965 | 1 | 586  | 17 | 0.0480482 |
| 0.0549347 | 1 | 467  | 10 | 0.046936  |
| 0.0714118 | 1 | 607  | 15 | 0.0456207 |
| 0.0682418 | 1 | 595  | 11 | 0.0356809 |
| 0.112941  | 1 | 960  | 24 | 0.02733   |
| 0.0768689 | 1 | 655  | 16 | 0.0311435 |
| 0.0811765 | 1 | 690  | 20 | 0.0478982 |
| 0.0984358 | 1 | 837  | 23 | 0.0246112 |
| 0.0741176 | 1 | 630  | 13 | 0.049902  |
| 0.0694118 | 1 | 590  | 16 | 0.0470331 |
| 0.0554863 | 1 | 935  | 26 | 0.0426546 |
| 0.0584391 | 1 | 912  | 26 | 0.0442436 |
| 0.106368  | 1 | 912  | 26 | 0.0442436 |
| 0.052386  | 1 | 449  | 13 | 0.0434314 |
| 0.128471  | 1 | 1092 | 23 | 0.0189792 |
| 0.0998823 | 1 | 849  | 24 | 0.0327943 |
| 0.0768235 | 1 | 653  | 15 | 0.0439523 |
| 0.103176  | 1 | 877  | 25 | 0.0310464 |
| 0.0537955 | 1 | 596  | 17 | 0.0476245 |
| 0.168     | 1 | 1428 | 40 | 0.0167105 |
| 0.0714118 | 1 | 607  | 17 | 0.0415777 |
| 0.106353  | 1 | 904  | 25 | 0.0323617 |
| 0.130706  | 1 | 1111 | 32 | 0.0162515 |
| 0.111176  | 1 | 945  | 26 | 0.0430519 |
| 0.0538326 | 1 | 887  | 25 | 0.0314525 |
| 0.0340475 | 1 | 561  | 13 | 0.0497519 |
| 0.0558354 | 1 | 920  | 26 | 0.0207535 |
| 0.0884706 | 1 | 752  | 15 | 0.0336947 |
| 0.0902353 | 1 | 767  | 22 | 0.0182642 |
| 0.0852941 | 1 | 725  | 20 | 0.0483307 |
| 0.17816   | 1 | 1594 | 43 | 0.0317967 |
| 0.0841176 | 1 | 715  | 18 | 0.0236931 |
| 0.1       | 1 | 850  | 24 | 0.0419396 |
| 0.127412  | 1 | 1083 | 25 | 0.0318321 |
| 0.0710678 | 1 | 605  | 14 | 0.0477216 |
| 0.0564042 | 1 | 480  | 11 | 0.0497519 |
| 0.0893168 | 1 | 770  | 21 | 0.0472714 |
| 0.0666667 | 1 | 567  | 10 | 0.0464151 |
| 0.0695294 | 1 | 591  | 17 | 0.0442259 |
| 0.07      | 1 | 595  | 14 | 0.0494695 |
| 0.101859  | 1 | 871  | 24 | 0.030402  |
| 0.0446803 | 1 | 661  | 19 | 0.0452587 |
| 0.0716879 | 1 | 612  | 17 | 0.0495489 |
| 0.0629965 | 1 | 571  | 15 | 0.0457089 |
| 0.0495294 | 1 | 421  | 12 | 0.0470596 |
| 0.0747642 | 1 | 642  | 18 | 0.048878  |

|           |   |      |    |           |
|-----------|---|------|----|-----------|
| 0.0410337 | 1 | 678  | 18 | 0.0471831 |
| 0.143827  | 1 | 1229 | 34 | 0.0228015 |
| 0.101882  | 1 | 866  | 24 | 0.0449145 |
| 0.0802353 | 1 | 682  | 12 | 0.0435903 |
| 0.0743743 | 1 | 633  | 18 | 0.0392648 |
| 0.137412  | 1 | 1168 | 31 | 0.0216627 |
| 0.0697647 | 1 | 593  | 14 | 0.0459208 |
| 0.0635294 | 1 | 540  | 14 | 0.0459738 |
| 0.0987306 | 1 | 840  | 24 | 0.0443407 |
| 0.0962623 | 1 | 819  | 16 | 0.0183436 |
| 0.0762353 | 1 | 648  | 18 | 0.0498755 |
| 0.100235  | 1 | 852  | 22 | 0.034189  |
| 0.0897647 | 1 | 763  | 17 | 0.0481365 |
| 0.0715294 | 1 | 608  | 16 | 0.0489398 |
| 0.0865166 | 1 | 761  | 22 | 0.0481983 |
| 0.0759657 | 1 | 647  | 18 | 0.0379407 |
| 0.0545412 | 1 | 941  | 20 | 0.0106283 |
| 0.0845485 | 1 | 719  | 19 | 0.0484278 |
| 0.0756471 | 1 | 643  | 18 | 0.0457089 |
| 0.0893355 | 1 | 769  | 20 | 0.022828  |
| 0.0683955 | 1 | 633  | 18 | 0.0329973 |
| 0.0694118 | 1 | 590  | 13 | 0.0468742 |
| 0.100353  | 1 | 853  | 25 | 0.0165693 |
| 0.0824706 | 1 | 701  | 20 | 0.0327678 |
| 0.0569473 | 1 | 857  | 23 | 0.0239049 |
| 0.0824706 | 1 | 701  | 20 | 0.0278067 |
| 0.0759302 | 1 | 753  | 17 | 0.0128617 |
| 0.0702797 | 1 | 603  | 12 | 0.0300577 |
| 0.139111  | 1 | 1183 | 32 | 0.0158542 |
| 0.0922353 | 1 | 784  | 21 | 0.0282922 |
| 0.055381  | 1 | 617  | 12 | 0.0475186 |
| 0.0740219 | 1 | 630  | 11 | 0.0330149 |
| 0.0661    | 1 | 591  | 17 | 0.0442171 |
| 0.0764706 | 1 | 650  | 18 | 0.0413305 |
| 0.0364985 | 1 | 507  | 10 | 0.0394855 |
| 0.0772304 | 1 | 696  | 20 | 0.0363076 |
| 0.120995  | 1 | 1031 | 25 | 0.0381526 |
| 0.086     | 1 | 731  | 21 | 0.0393443 |
| 0.0711765 | 1 | 605  | 17 | 0.0450557 |
| 0.0754141 | 1 | 642  | 18 | 0.0444554 |
| 0.0938824 | 1 | 798  | 22 | 0.0406861 |
| 0.0686229 | 1 | 587  | 13 | 0.0320704 |
| 0.068811  | 1 | 599  | 11 | 0.039106  |
| 0.0614973 | 1 | 529  | 15 | 0.0481807 |
| 0.0838824 | 1 | 713  | 19 | 0.0323882 |
| 0.0692941 | 1 | 589  | 17 | 0.0391324 |
| 0.023471  | 1 | 454  | 12 | 0.0487015 |



|           |          |      |    |            |
|-----------|----------|------|----|------------|
| 0.0675623 | 1        | 865  | 23 | 0.0489398  |
| 0.0978728 | 1        | 865  | 23 | 0.0489398  |
| 0.106588  | 1        | 906  | 24 | 0.0256881  |
| 0.0682824 | 1        | 617  | 17 | 0.0469448  |
| 0.0575294 | 1        | 489  | 13 | 0.0431578  |
| 0.0773202 | 1        | 659  | 12 | 0.0314525  |
| 0.0335768 | 1        | 685  | 19 | 0.0439346  |
| 0.0707059 | 1        | 601  | 15 | 0.049955   |
| 0.121418  | 1        | 1072 | 26 | 0.0291838  |
| 0.111854  | 1        | 953  | 19 | 0.0344362  |
| 0.069868  | 1        | 598  | 17 | 0.04555    |
| 0.0676533 | 1        | 672  | 19 | 0.0319027  |
| 0.0929412 | 1        | 790  | 14 | 0.0296781  |
| 0.0795794 | 1        | 772  | 21 | 0.0247877  |
| 0.0744718 | 1        | 638  | 18 | 0.0467241  |
| 0.071387  | 1        | 614  | 14 | 0.0333769  |
| 0.104235  | 1        | 886  | 20 | 0.0285394  |
| 0.0692941 | 1        | 589  | 16 | 0.0473862  |
| 0.0804706 | 1        | 684  | 19 | 0.0331562  |
| 0.0418932 | 1        | 601  | 14 | 0.0388058  |
| 0.0670302 | 1        | 590  | 15 | 0.0474656  |
| 0.140588  | 1        | 1195 | 33 | 0.00551721 |
| 0.13338   | 1        | 1136 | 30 | 0.022007   |
| 0.0369547 | 0.335813 | 941  | 25 | 0.0284688  |
| 0.110446  | 1        | 941  | 25 | 0.0284688  |
| 0.0697429 | 1        | 594  | 17 | 0.047192   |
| 0.0783529 | 1        | 666  | 17 | 0.0305962  |
| 0.0567432 | 1        | 722  | 18 | 0.0264208  |
| 0.0903332 | 1        | 770  | 22 | 0.0413128  |
| 0.098992  | 1        | 874  | 22 | 0.0343303  |
| 0.0787059 | 1        | 669  | 19 | 0.0428665  |
| 0.108693  | 1        | 924  | 25 | 0.034136   |
| 0.039312  | 1        | 336  | 10 | 0.0398298  |
| 0.074613  | 1        | 641  | 18 | 0.046627   |
| 0.108     | 1        | 918  | 24 | 0.0457001  |
| 0.0421896 | 1        | 632  | 13 | 0.0345245  |
| 0.0743529 | 1        | 632  | 13 | 0.0345245  |
| 0.0870483 | 1        | 742  | 20 | 0.0151216  |
| 0.0233075 | 1        | 661  | 17 | 0.0322381  |
| 0.0252821 | 1        | 717  | 15 | 0.0342685  |
| 0.0718824 | 1        | 611  | 13 | 0.0482689  |
| 0.0792184 | 1        | 677  | 14 | 0.0375082  |
| 0.105004  | 1        | 896  | 25 | 0.0226603  |
| 0.0686746 | 1        | 586  | 11 | 0.0462209  |
| 0.0707746 | 1        | 603  | 17 | 0.022828   |
| 0.0960734 | 1        | 827  | 24 | 0.0343303  |
| 0.0688667 | 1        | 601  | 16 | 0.0424869  |

|            |          |      |    |           |
|------------|----------|------|----|-----------|
| 0.0705813  | 1        | 601  | 16 | 0.0424869 |
| 0.0711765  | 1        | 605  | 17 | 0.0392737 |
| 0.0628672  | 1        | 535  | 14 | 0.0428665 |
| 0.0734118  | 1        | 624  | 14 | 0.0468389 |
| 0.0709328  | 1        | 603  | 15 | 0.0424516 |
| 0.0842439  | 1        | 717  | 14 | 0.0320174 |
| 0.0796471  | 1        | 677  | 18 | 0.0432549 |
| 0.0697979  | 1        | 639  | 14 | 0.0292015 |
| 0.069257   | 1        | 590  | 17 | 0.0457619 |
| 0.0242758  | 1        | 357  | 10 | 0.0490546 |
| 0.0830704  | 1        | 711  | 20 | 0.0433608 |
| 0.0302283  | 1        | 343  | 10 | 0.0476687 |
| 0.083226   | 1        | 711  | 17 | 0.0322646 |
| 0.120325   | 1        | 1023 | 29 | 0.0319203 |
| 0.0572779  | 1        | 606  | 17 | 0.0318674 |
| 0.0623705  | 1        | 542  | 15 | 0.0485426 |
| 0.0700102  | 1        | 617  | 17 | 0.0496195 |
| 0.106221   | 1        | 992  | 27 | 0.0161897 |
| 0.0706446  | 1        | 605  | 17 | 0.0454618 |
| 0.0952027  | 1        | 1409 | 36 | 0.0299518 |
| 0.0701176  | 1        | 596  | 11 | 0.0404301 |
| 0.0573691  | 1        | 652  | 14 | 0.0238167 |
| 0.0894118  | 1        | 760  | 14 | 0.0294839 |
| 0.082988   | 1        | 721  | 16 | 0.0398651 |
| 0.0824848  | 1        | 721  | 16 | 0.0398651 |
| 0.0711681  | 1        | 605  | 16 | 0.0443407 |
| 0.0742656  | 1        | 632  | 18 | 0.0313642 |
| 0.0462494  | 1        | 402  | 11 | 0.0464858 |
| 0.00512562 | 0.174037 | 701  | 16 | 0.0407655 |
| 0.126486   | 1        | 1085 | 26 | 0.0155894 |
| 0.0741975  | 1        | 668  | 13 | 0.0297664 |
| 0.0901726  | 1        | 768  | 22 | 0.0278773 |
| 0.110118   | 1        | 936  | 26 | 0.0159072 |
| 0.052826   | 1        | 472  | 14 | 0.0110167 |
| 0.0851765  | 1        | 724  | 20 | 0.0317703 |
| 0.0790861  | 1        | 675  | 19 | 0.0389117 |
| 0.0331016  | 1        | 681  | 19 | 0.0305432 |
| 0.0658926  | 1        | 681  | 19 | 0.0305432 |
| 0.0697376  | 1        | 598  | 12 | 0.0486044 |
| 0.0776471  | 1        | 660  | 19 | 0.0432284 |
| 0.0694591  | 1        | 592  | 15 | 0.0489045 |
| 0.134225   | 1        | 1144 | 32 | 0.0491164 |
| 0.101059   | 1        | 859  | 24 | 0.0324676 |
| 0.0708235  | 1        | 602  | 17 | 0.0384704 |
| 0.0725929  | 1        | 619  | 14 | 0.0425045 |
| 0.113176   | 1        | 962  | 27 | 0.0185202 |
| 0.101294   | 1        | 861  | 25 | 0.0298017 |

|           |          |      |    |            |
|-----------|----------|------|----|------------|
| 0.0970588 | 1        | 825  | 23 | 0.0217246  |
| 0.0621931 | 0.702774 | 757  | 21 | 0.00196854 |
| 0.0630588 | 0.994434 | 539  | 15 | 0.0283628  |
| 0.0713027 | 1        | 607  | 17 | 0.0454971  |
| 0.0710434 | 1        | 606  | 17 | 0.0254498  |
| 0.0725882 | 1        | 617  | 15 | 0.0403948  |
| 0.078     | 1        | 663  | 13 | 0.0323882  |
| 0.118941  | 1        | 1011 | 28 | 0.022113   |
| 0.0747328 | 1        | 790  | 22 | 0.0321852  |
| 0.0728235 | 1        | 619  | 18 | 0.0434314  |
| 0.115529  | 1        | 982  | 27 | 0.0373051  |
| 0.0729412 | 1        | 620  | 17 | 0.0473155  |
| 0.105647  | 1        | 898  | 25 | 0.0444643  |
| 0.0862353 | 1        | 733  | 21 | 0.0152981  |
| 0.0643134 | 1        | 614  | 18 | 0.0373316  |
| 0.074     | 1        | 629  | 18 | 0.0490546  |
| 0.118471  | 1        | 1007 | 28 | 0.01566    |
| 0.0881176 | 1        | 749  | 19 | 0.0434668  |
| 0.049991  | 1        | 837  | 24 | 0.0495401  |
| 0.0457715 | 1        | 709  | 21 | 0.0341978  |
| 0.0950588 | 1        | 808  | 23 | 0.0293515  |
| 0.114588  | 1        | 974  | 26 | 0.0307551  |
| 0.114808  | 1        | 980  | 27 | 0.0223336  |
| 0.074762  | 1        | 636  | 18 | 0.0378613  |
| 0.0451156 | 1        | 605  | 17 | 0.0484808  |
| 0.0706528 | 1        | 605  | 17 | 0.0484808  |
| 0.058576  | 1        | 877  | 23 | 0.0229163  |
| 0.02498   | 1        | 374  | 19 | 0.0442524  |
| 0.0467181 | 1        | 721  | 17 | 0.0217863  |
| 0.0640047 | 1        | 545  | 14 | 0.0340389  |
| 0.0415444 | 1        | 609  | 17 | 0.041357   |
| 0.0721859 | 1        | 640  | 12 | 0.0367225  |
| 0.0981176 | 1        | 834  | 23 | 0.0330238  |
| 0.121529  | 1        | 1033 | 23 | 0.0327237  |
| 0.0800611 | 1        | 681  | 18 | 0.0464505  |
| 0.129943  | 1        | 1137 | 28 | 0.010849   |
| 0.0814118 | 1        | 692  | 20 | 0.0416748  |
| 0.0803124 | 1        | 689  | 15 | 0.0446496  |
| 0.102353  | 1        | 870  | 23 | 0.0282216  |
| 0.0652941 | 1        | 555  | 12 | 0.0499108  |
| 0.0757926 | 1        | 655  | 18 | 0.0470331  |
| 0.07      | 1        | 595  | 14 | 0.0470331  |
| 0.0788235 | 1        | 670  | 19 | 0.0280362  |
| 0.11059   | 1        | 943  | 26 | 0.0155011  |
| 0.0346238 | 1        | 711  | 20 | 0.0309493  |
| 0.10201   | 1        | 873  | 25 | 0.0220335  |
| 0.0756471 | 1        | 643  | 14 | 0.0482071  |

|           |          |      |    |           |
|-----------|----------|------|----|-----------|
| 0.0709412 | 1        | 603  | 17 | 0.0498314 |
| 0.015662  | 1        | 608  | 17 | 0.0474303 |
| 0.0151468 | 1        | 588  | 16 | 0.049134  |
| 0.0922353 | 1        | 784  | 17 | 0.0326354 |
| 0.0831184 | 1        | 709  | 20 | 0.0481277 |
| 0.074152  | 1        | 634  | 18 | 0.0443671 |
| 0.0870588 | 1        | 740  | 20 | 0.0434314 |
| 0.0234057 | 0.466216 | 740  | 20 | 0.0434314 |
| 0.128118  | 1        | 1089 | 24 | 0.019959  |
| 0.0703529 | 1        | 598  | 17 | 0.0498844 |
| 0.107051  | 1        | 911  | 18 | 0.022113  |
| 0.0855294 | 1        | 727  | 15 | 0.030711  |
| 0.0380585 | 1        | 948  | 23 | 0.0131618 |
| 0.0976624 | 1        | 869  | 23 | 0.0311524 |
| 0.0803481 | 1        | 711  | 19 | 0.0374993 |
| 0.0783026 | 1        | 882  | 19 | 0.0315408 |
| 0.0704209 | 1        | 599  | 17 | 0.0417277 |
| 0.100752  | 1        | 857  | 24 | 0.0207094 |
| 0.0937647 | 1        | 797  | 22 | 0.033986  |
| 0.0725882 | 1        | 617  | 17 | 0.0408097 |
| 0.0599157 | 1        | 597  | 17 | 0.0220865 |
| 0.0845173 | 1        | 1047 | 29 | 0.0207535 |
| 0.121419  | 1        | 1047 | 29 | 0.0207535 |
| 0.0723924 | 1        | 617  | 17 | 0.0484984 |
| 0.0550416 | 1        | 470  | 11 | 0.0458943 |
| 0.11052   | 1        | 955  | 25 | 0.0212302 |
| 0.0955765 | 1        | 955  | 25 | 0.0212302 |
| 0.0463509 | 0.732169 | 687  | 17 | 0.0492841 |
| 0.066441  | 1        | 687  | 17 | 0.0492841 |
| 0.115647  | 1        | 983  | 28 | 0.0369785 |
| 0.0790588 | 1        | 672  | 19 | 0.0455324 |
| 0.0723529 | 1        | 615  | 18 | 0.045859  |
| 0.0703333 | 1        | 633  | 18 | 0.0344362 |
| 0.0695441 | 1        | 601  | 17 | 0.0491605 |
| 0.131111  | 1        | 1121 | 32 | 0.0325118 |
| 0.0709412 | 1        | 603  | 17 | 0.0456207 |
| 0.0885587 | 1        | 757  | 21 | 0.0473862 |
| 0.0565882 | 1        | 481  | 14 | 0.0320263 |
| 0.0761124 | 1        | 650  | 17 | 0.049134  |
| 0.0824706 | 1        | 701  | 14 | 0.0437669 |
| 0.0428746 | 1        | 596  | 17 | 0.0485602 |
| 0.0650588 | 1        | 553  | 16 | 0.0497166 |
| 0.0869918 | 1        | 751  | 14 | 0.0463887 |
| 0.195986  | 1        | 1670 | 46 | 0.0200738 |
| 0.0676497 | 1        | 601  | 16 | 0.0416483 |
| 0.0761213 | 1        | 650  | 18 | 0.0437669 |
| 0.0719054 | 1        | 614  | 16 | 0.0471567 |

|           |          |      |    |            |
|-----------|----------|------|----|------------|
| 0.0691765 | 1        | 588  | 17 | 0.0416041  |
| 0.0898824 | 1        | 764  | 20 | 0.0215921  |
| 0.0717647 | 1        | 610  | 17 | 0.0403948  |
| 0.078     | 1        | 663  | 12 | 0.0483042  |
| 0.0709038 | 1        | 608  | 17 | 0.04811    |
| 0.0699099 | 1        | 605  | 17 | 0.0459826  |
| 0.0698029 | 1        | 595  | 16 | 0.0475451  |
| 0.178353  | 1        | 1516 | 40 | 0.0289984  |
| 0.0810588 | 1        | 689  | 19 | 0.0478717  |
| 0.128256  | 1        | 1103 | 30 | 0.024364   |
| 0.0547059 | 1        | 465  | 11 | 0.0488162  |
| 0.140491  | 1        | 1196 | 34 | 0.029175   |
| 0.0735294 | 1        | 625  | 14 | 0.0318232  |
| 0.0937647 | 1        | 797  | 22 | 0.0295193  |
| 0.0632941 | 1        | 538  | 15 | 0.0320263  |
| 0.124677  | 1        | 1060 | 28 | 0.0340125  |
| 0.0811765 | 1        | 690  | 15 | 0.0419043  |
| 0.0669296 | 1        | 611  | 17 | 0.0381349  |
| 0.0925882 | 1        | 787  | 21 | 0.0437934  |
| 0.109176  | 1        | 928  | 26 | 0.018476   |
| 0.0654315 | 1        | 558  | 16 | 0.0463357  |
| 0.0714118 | 1        | 607  | 17 | 0.0466005  |
| 0.0806997 | 1        | 692  | 15 | 0.0497166  |
| 0.0807059 | 1        | 686  | 17 | 0.0408714  |
| 0.0605954 | 1        | 517  | 13 | 0.0471125  |
| 0.0767059 | 1        | 652  | 14 | 0.0331827  |
| 0.0729412 | 1        | 620  | 16 | 0.0317526  |
| 0.080694  | 1        | 693  | 16 | 0.0323441  |
| 0.0778823 | 1        | 662  | 19 | 0.0322823  |
| 0.0718521 | 1        | 618  | 14 | 0.0345156  |
| 0.098     | 1        | 833  | 24 | 0.0322734  |
| 0.0437073 | 1        | 390  | 10 | 0.0424074  |
| 0.0951765 | 1        | 809  | 22 | 0.00788298 |
| 0.0943529 | 1        | 802  | 23 | 0.0191999  |
| 0.0709412 | 1        | 603  | 17 | 0.0415247  |
| 0.0551765 | 1        | 469  | 13 | 0.0473862  |
| 0.0769863 | 1        | 656  | 13 | 0.0322646  |
| 0.0670975 | 1        | 571  | 16 | 0.0406861  |
| 0.104     | 1        | 884  | 25 | 0.0166487  |
| 0.109765  | 1        | 933  | 25 | 0.029175   |
| 0.0781176 | 0.881806 | 753  | 22 | 0.0453382  |
| 0.0565331 | 1        | 800  | 22 | 0.0422221  |
| 0.0706791 | 1        | 613  | 11 | 0.0416836  |
| 0.0699715 | 1        | 614  | 16 | 0.0498402  |
| 0.0688197 | 1        | 586  | 16 | 0.0464858  |
| 0.0692371 | 1        | 589  | 11 | 0.0400858  |
| 0.123176  | 1        | 1047 | 24 | 0.0271182  |

|            |           |      |    |            |
|------------|-----------|------|----|------------|
| 0.0810588  | 1         | 689  | 17 | 0.0320263  |
| 0.0734118  | 1         | 624  | 18 | 0.0493017  |
| 0.0762353  | 1         | 648  | 19 | 0.0370756  |
| 0.0894137  | 1         | 761  | 21 | 0.0429459  |
| 0.0799324  | 1         | 709  | 18 | 0.0401388  |
| 0.0726696  | 1         | 619  | 17 | 0.0495401  |
| 0.0628739  | 1         | 620  | 17 | 0.0223954  |
| 0.0605415  | 1         | 597  | 17 | 0.0486573  |
| 0.0772741  | 1         | 762  | 21 | 0.0234371  |
| 0.126824   | 1         | 1078 | 28 | 0.0184231  |
| 0.0985882  | 1         | 838  | 24 | 0.0136562  |
| 0.0429991  | 1         | 597  | 10 | 0.0435992  |
| 0.0243446  | 1         | 338  | 10 | 0.0466623  |
| 0.0703529  | 1         | 598  | 12 | 0.0320174  |
| 0.0783529  | 1         | 666  | 19 | 0.0488162  |
| 0.00176471 | 0.0129758 | 1156 | 32 | 0.0410215  |
| 0.0717647  | 1         | 610  | 17 | 0.04811    |
| 0.084008   | 1         | 716  | 20 | 0.0499373  |
| 0.0875171  | 1         | 767  | 21 | 0.0292015  |
| 0.092183   | 1         | 796  | 20 | 0.0437492  |
| 0.0702614  | 1         | 602  | 11 | 0.0299341  |
| 0.0734525  | 1         | 801  | 23 | 0.0100457  |
| 0.081223   | 1         | 696  | 20 | 0.048878   |
| 0.0822014  | 1         | 702  | 20 | 0.0449409  |
| 0.090967   | 1         | 857  | 24 | 0.0236401  |
| 0.114562   | 1         | 985  | 24 | 0.0325824  |
| 0.153991   | 1         | 1312 | 36 | 0.0340566  |
| 0.0694118  | 1         | 590  | 17 | 0.0460356  |
| 0.0725882  | 1         | 617  | 11 | 0.0478099  |
| 0.047956   | 1         | 820  | 23 | 0.0318056  |
| 0.0709412  | 1         | 603  | 14 | 0.0490899  |
| 0.0728235  | 1         | 619  | 17 | 0.0435639  |
| 0.128706   | 1         | 1094 | 23 | 0.0330238  |
| 0.0553276  | 1         | 472  | 11 | 0.0495401  |
| 0.102434   | 1         | 871  | 23 | 0.0253085  |
| 0.0857647  | 1         | 729  | 20 | 0.0439787  |
| 0.0768235  | 1         | 653  | 13 | 0.0413305  |
| 0.0862353  | 1         | 733  | 19 | 0.0264296  |
| 0.107294   | 1         | 912  | 24 | 0.0343038  |
| 0.151176   | 1         | 1285 | 36 | 0.0161897  |
| 0.113796   | 1         | 970  | 27 | 0.0313112  |
| 0.0459247  | 0.449388  | 899  | 25 | 0.0225014  |
| 0.088401   | 1         | 753  | 19 | 0.00574672 |
| 0.128896   | 1         | 1096 | 28 | 0.0119525  |
| 0.0726802  | 1         | 618  | 18 | 0.0431578  |
| 0.112905   | 1         | 986  | 26 | 0.0203916  |
| 0.0724706  | 1         | 616  | 14 | 0.0463445  |

|           |          |      |    |            |
|-----------|----------|------|----|------------|
| 0.0201176 | 0.188534 | 907  | 19 | 0.033165   |
| 0.0633955 | 1        | 907  | 19 | 0.033165   |
| 0.0748235 | 1        | 636  | 18 | 0.0329885  |
| 0.0730588 | 1        | 621  | 15 | 0.0401476  |
| 0.0696471 | 1        | 592  | 17 | 0.0373581  |
| 0.100235  | 1        | 852  | 24 | 0.0169312  |
| 0.234914  | 1        | 1997 | 53 | 0.0097809  |
| 0.0795273 | 1        | 747  | 21 | 0.0345509  |
| 0.113423  | 1        | 965  | 24 | 0.0149009  |
| 0.103529  | 1        | 880  | 25 | 0.0178051  |
| 0.108     | 1        | 918  | 23 | 0.0202239  |
| 0.0712128 | 1        | 613  | 18 | 0.0495754  |
| 0.0824706 | 1        | 701  | 20 | 0.0475804  |
| 0.0821176 | 1        | 698  | 19 | 0.045806   |
| 0.079873  | 1        | 679  | 19 | 0.0198531  |
| 0.123973  | 1        | 1056 | 30 | 0.0165516  |
| 0.0407356 | 1        | 350  | 10 | 0.0479335  |
| 0.089637  | 1        | 852  | 23 | 0.0458414  |
| 0.0694118 | 1        | 590  | 16 | 0.0328031  |
| 0.136588  | 1        | 1161 | 28 | 0.0155011  |
| 0.0768235 | 1        | 653  | 18 | 0.0391413  |
| 0.0773474 | 1        | 659  | 15 | 0.0324058  |
| 0.0695294 | 1        | 591  | 17 | 0.0430872  |
| 0.0974118 | 1        | 828  | 23 | 0.040739   |
| 0.0756471 | 1        | 643  | 16 | 0.0387617  |
| 0.0991994 | 1        | 855  | 22 | 0.0331915  |
| 0.124724  | 1        | 1074 | 30 | 0.0140623  |
| 0.0758824 | 1        | 645  | 18 | 0.0301372  |
| 0.0705882 | 1        | 600  | 17 | 0.042019   |
| 0.0916471 | 1        | 779  | 22 | 0.0475274  |
| 0.0604604 | 1        | 1308 | 32 | 0.00793595 |
| 0.0275955 | 1        | 597  | 14 | 0.0406066  |
| 0.0195526 | 1        | 423  | 11 | 0.0342596  |
| 0.0619395 | 1        | 1340 | 33 | 0.00991331 |
| 0.0570861 | 1        | 1235 | 27 | 0.00489928 |
| 0.0761737 | 1        | 649  | 14 | 0.0122968  |
| 0.078901  | 1        | 672  | 19 | 0.0480835  |
| 0.0979381 | 1        | 836  | 16 | 0.0292015  |
| 0.0716471 | 1        | 609  | 17 | 0.0414629  |
| 0.0571765 | 1        | 486  | 14 | 0.0418866  |
| 0.0711765 | 1        | 605  | 17 | 0.0440935  |
| 0.057925  | 1        | 493  | 14 | 0.0451352  |
| 0.0768235 | 1        | 653  | 13 | 0.0411186  |
| 0.094     | 1        | 799  | 22 | 0.034242   |
| 0.118     | 1        | 1003 | 24 | 0.02861    |
| 0.0720384 | 1        | 616  | 17 | 0.0473067  |
| 0.0729412 | 1        | 620  | 17 | 0.0477393  |

|            |           |      |    |           |
|------------|-----------|------|----|-----------|
| 0.0845882  | 1         | 719  | 20 | 0.0338006 |
| 0.0945882  | 1         | 804  | 21 | 0.0219982 |
| 0.0958319  | 1         | 1145 | 26 | 0.0166664 |
| 0.134405   | 1         | 1145 | 26 | 0.0166664 |
| 0.105294   | 1         | 895  | 25 | 0.0147596 |
| 0.0749795  | 1         | 641  | 11 | 0.0441994 |
| 0.0689575  | 1         | 590  | 12 | 0.0292456 |
| 0.0616703  | 1         | 590  | 12 | 0.0292456 |
| 0.102772   | 1         | 912  | 22 | 0.0297576 |
| 0.0823755  | 1         | 731  | 21 | 0.0438287 |
| 0.0731249  | 1         | 622  | 18 | 0.0462562 |
| 0.0701529  | 1         | 601  | 14 | 0.0423721 |
| 0.0498824  | 1         | 424  | 12 | 0.049081  |
| 0.0713615  | 1         | 608  | 17 | 0.0483219 |
| 0.0607143  | 1         | 527  | 14 | 0.0456207 |
| 0.0562242  | 1         | 626  | 18 | 0.0450557 |
| 0.0782333  | 1         | 666  | 19 | 0.0364577 |
| 0.0992643  | 1         | 958  | 21 | 0.0206476 |
| 0.0808591  | 1         | 689  | 20 | 0.0370668 |
| 0.0702455  | 1         | 598  | 10 | 0.0489398 |
| 0.082659   | 1         | 715  | 20 | 0.0329178 |
| 0.0725882  | 1         | 617  | 17 | 0.0457531 |
| 0.0694118  | 1         | 590  | 17 | 0.0415777 |
| 0.0741306  | 1         | 631  | 18 | 0.0442083 |
| 0.0911106  | 1         | 781  | 22 | 0.0424604 |
| 0.0694289  | 1         | 620  | 18 | 0.049081  |
| 0.0486002  | 0.49095   | 884  | 22 | 0.0320881 |
| 0.0805882  | 1         | 685  | 17 | 0.018476  |
| 0.120216   | 1         | 1024 | 28 | 0.0208771 |
| 0.00691404 | 0.0970874 | 618  | 17 | 0.0398386 |
| 0.0727059  | 1         | 618  | 17 | 0.0398386 |
| 0.0314353  | 1         | 583  | 15 | 0.0477393 |
| 0.0711852  | 1         | 606  | 10 | 0.0457531 |
| 0.052673   | 1         | 871  | 22 | 0.0305256 |
| 0.0714453  | 1         | 609  | 15 | 0.0463622 |
| 0.0371121  | 1         | 659  | 18 | 0.0415247 |
| 0.127422   | 1         | 1085 | 29 | 0.0205417 |
| 0.0714118  | 1         | 607  | 17 | 0.0461238 |
| 0.0911765  | 1         | 775  | 20 | 0.0396268 |
| 0.0693309  | 1         | 602  | 13 | 0.0476422 |
| 0.134627   | 1         | 1145 | 32 | 0.0212655 |
| 0.0482451  | 1         | 411  | 10 | 0.0136915 |
| 0.0514118  | 1         | 437  | 13 | 0.0299518 |
| 0.0773281  | 1         | 793  | 23 | 0.02989   |
| 0.120706   | 1         | 1026 | 23 | 0.0233576 |
| 0.0864386  | 0.90711   | 872  | 25 | 0.0269504 |
| 0.0710588  | 1         | 604  | 10 | 0.0320263 |



|            |           |      |    |            |
|------------|-----------|------|----|------------|
| 0.0762353  | 1         | 648  | 13 | 0.0417807  |
| 0.0726888  | 1         | 618  | 17 | 0.0435903  |
| 0.0868545  | 1         | 740  | 17 | 0.0455324  |
| 0.0771765  | 1         | 656  | 19 | 0.0302255  |
| 0.0738824  | 1         | 628  | 16 | 0.0320881  |
| 0.0861176  | 1         | 732  | 12 | 0.0485602  |
| 0.0790588  | 1         | 672  | 17 | 0.0442259  |
| 0.0863764  | 1         | 738  | 21 | 0.0318232  |
| 0.0808973  | 1         | 714  | 20 | 0.0455324  |
| 0.0719465  | 1         | 635  | 18 | 0.0424869  |
| 0.0245194  | 1         | 1042 | 28 | 0.0211243  |
| 0.0152011  | 1         | 646  | 17 | 0.0471567  |
| 0.0280255  | 1         | 1191 | 32 | 0.0102399  |
| 0.129647   | 1         | 1102 | 28 | 0.0292544  |
| 0.0673763  | 1         | 595  | 17 | 0.0291132  |
| 0.106655   | 1         | 936  | 24 | 0.0132148  |
| 0.0679489  | 1         | 590  | 16 | 0.0487279  |
| 0.125361   | 1         | 1085 | 26 | 0.0143977  |
| 0.105468   | 1         | 920  | 18 | 0.0152275  |
| 0.0311728  | 0.250947  | 1056 | 29 | 0.0467859  |
| 0.0798824  | 1         | 679  | 12 | 0.0119613  |
| 0.0722353  | 1         | 614  | 15 | 0.0413923  |
| 0.066853   | 1         | 598  | 14 | 0.0464769  |
| 0.0426333  | 1         | 691  | 14 | 0.0321146  |
| 0.0701652  | 1         | 599  | 10 | 0.030861   |
| 0.0475294  | 1         | 404  | 12 | 0.0470331  |
| 0.0691765  | 1         | 588  | 17 | 0.0429548  |
| 0.0717647  | 1         | 610  | 17 | 0.0495754  |
| 0.0987059  | 1         | 839  | 24 | 0.0143977  |
| 0.0923113  | 1         | 790  | 17 | 0.0344097  |
| 0.104931   | 1         | 898  | 24 | 0.0102488  |
| 0.0430887  | 1         | 678  | 17 | 0.0454794  |
| 0.0696471  | 1         | 592  | 16 | 0.0499285  |
| 0.0810842  | 1         | 706  | 20 | 0.0434314  |
| 0.102309   | 1         | 873  | 23 | 0.021804   |
| 0.0854118  | 1         | 726  | 20 | 0.0467064  |
| 0.00776471 | 0.0714286 | 924  | 26 | 0.0330767  |
| 0.0974118  | 1         | 828  | 23 | 0.0341096  |
| 0.131529   | 1         | 1118 | 31 | 0.00809484 |
| 0.0975294  | 1         | 829  | 23 | 0.0127911  |
| 0.0745795  | 1         | 634  | 18 | 0.0453029  |
| 0.082      | 1         | 697  | 19 | 0.040227   |
| 0.0946195  | 1         | 925  | 25 | 0.0343303  |
| 0.0712191  | 1         | 607  | 17 | 0.0447556  |
| 0.0598824  | 1         | 509  | 14 | 0.0460179  |
| 0.0762353  | 1         | 648  | 16 | 0.0442877  |
| 0.0724706  | 1         | 616  | 17 | 0.0464593  |

|           |   |      |    |            |
|-----------|---|------|----|------------|
| 0.0696692 | 1 | 594  | 16 | 0.0165869  |
| 0.0694347 | 1 | 592  | 17 | 0.0475804  |
| 0.0703827 | 1 | 971  | 23 | 0.0292986  |
| 0.038272  | 1 | 528  | 15 | 0.0495401  |
| 0.0744706 | 1 | 633  | 13 | 0.0333681  |
| 0.117647  | 1 | 1000 | 24 | 0.0283099  |
| 0.0481983 | 1 | 630  | 14 | 0.0461327  |
| 0.0997647 | 1 | 848  | 24 | 0.0424957  |
| 0.0531159 | 1 | 456  | 13 | 0.0480924  |
| 0.0639628 | 1 | 880  | 24 | 0.0217246  |
| 0.0678824 | 1 | 577  | 16 | 0.033677   |
| 0.0711765 | 1 | 605  | 13 | 0.0395385  |
| 0.0687059 | 1 | 584  | 17 | 0.0499462  |
| 0.119882  | 1 | 1019 | 28 | 0.0496548  |
| 0.116706  | 1 | 992  | 26 | 0.0165693  |
| 0.0912941 | 1 | 776  | 22 | 0.0415512  |
| 0.0447626 | 1 | 641  | 13 | 0.046318   |
| 0.0691765 | 1 | 588  | 17 | 0.0462827  |
| 0.100306  | 1 | 853  | 24 | 0.0289719  |
| 0.0992941 | 1 | 844  | 24 | 0.0453735  |
| 0.138941  | 1 | 1181 | 29 | 0.0409774  |
| 0.108118  | 1 | 919  | 25 | 0.0237284  |
| 0.0744382 | 1 | 636  | 18 | 0.0472096  |
| 0.132235  | 1 | 1124 | 31 | 0.0295899  |
| 0.0704706 | 1 | 599  | 17 | 0.0460973  |
| 0.0609412 | 1 | 518  | 15 | 0.0340389  |
| 0.0605741 | 1 | 690  | 19 | 0.0478717  |
| 0.0785236 | 1 | 668  | 17 | 0.0385498  |
| 0.0724706 | 1 | 616  | 13 | 0.0391236  |
| 0.0711116 | 1 | 609  | 17 | 0.0472626  |
| 0.0757647 | 1 | 644  | 18 | 0.0464416  |
| 0.0637392 | 1 | 614  | 18 | 0.0414011  |
| 0.060207  | 1 | 512  | 15 | 0.0431666  |
| 0.141593  | 1 | 1232 | 35 | 0.00954256 |
| 0.11332   | 1 | 986  | 28 | 0.00757402 |
| 0.0702753 | 1 | 605  | 13 | 0.0448703  |
| 0.0590833 | 1 | 776  | 20 | 0.0369697  |
| 0.0489569 | 1 | 643  | 17 | 0.0477393  |
| 0.117916  | 1 | 1007 | 27 | 0.0225808  |
| 0.118137  | 1 | 1007 | 27 | 0.0225808  |
| 0.178332  | 1 | 1516 | 36 | 0.0234547  |
| 0.14363   | 1 | 1221 | 30 | 0.0127381  |
| 0.100235  | 1 | 852  | 21 | 0.0245494  |
| 0.194118  | 1 | 1650 | 36 | 0.0064794  |
| 0.0716471 | 1 | 609  | 15 | 0.0497873  |
| 0.0689089 | 1 | 588  | 17 | 0.0472714  |
| 0.0628504 | 1 | 639  | 13 | 0.0375435  |

|           |   |      |    |            |
|-----------|---|------|----|------------|
| 0.0931925 | 1 | 794  | 20 | 0.0203298  |
| 0.109386  | 1 | 930  | 26 | 0.0219629  |
| 0.116953  | 1 | 1001 | 21 | 0.0150862  |
| 0.0704706 | 1 | 599  | 12 | 0.0413658  |
| 0.0818824 | 1 | 696  | 16 | 0.0468653  |
| 0.0865882 | 1 | 736  | 20 | 0.043758   |
| 0.0865882 | 1 | 736  | 21 | 0.0282128  |
| 0.0322559 | 1 | 480  | 14 | 0.0497519  |
| 0.0466766 | 1 | 842  | 23 | 0.0236225  |
| 0.0814118 | 1 | 692  | 20 | 0.0335269  |
| 0.0765882 | 1 | 651  | 18 | 0.0451705  |
| 0.0688235 | 1 | 585  | 17 | 0.0474656  |
| 0.0554058 | 1 | 596  | 17 | 0.0473685  |
| 0.0635628 | 1 | 1069 | 28 | 0.0166664  |
| 0.125573  | 1 | 1069 | 28 | 0.0166664  |
| 0.0409085 | 1 | 688  | 15 | 0.0335269  |
| 0.0808176 | 1 | 688  | 15 | 0.0335269  |
| 0.0375998 | 1 | 631  | 17 | 0.0428488  |
| 0.036706  | 1 | 616  | 15 | 0.0471125  |
| 0.0754118 | 1 | 641  | 18 | 0.0164545  |
| 0.0687059 | 1 | 584  | 16 | 0.0350718  |
| 0.0715713 | 1 | 609  | 17 | 0.0498755  |
| 0.063126  | 1 | 542  | 12 | 0.0464593  |
| 0.139808  | 1 | 1192 | 30 | 0.0328737  |
| 0.0739404 | 1 | 635  | 18 | 0.0354337  |
| 0.136588  | 1 | 1161 | 32 | 0.0331032  |
| 0.111882  | 1 | 951  | 26 | 0.00911884 |
| 0.0931024 | 1 | 930  | 26 | 0.0276478  |
| 0.0622859 | 1 | 600  | 15 | 0.042637   |
| 0.0712035 | 1 | 610  | 17 | 0.0493724  |
| 0.0734118 | 1 | 624  | 18 | 0.0441465  |
| 0.0726511 | 1 | 624  | 18 | 0.0441465  |
| 0.0553211 | 1 | 472  | 13 | 0.0415512  |
| 0.0736484 | 1 | 628  | 18 | 0.0487721  |
| 0.0971033 | 1 | 828  | 23 | 0.0249643  |
| 0.0351838 | 1 | 668  | 19 | 0.0451263  |
| 0.0898824 | 1 | 764  | 21 | 0.0454529  |
| 0.0934838 | 1 | 812  | 22 | 0.0308081  |
| 0.0563822 | 1 | 485  | 11 | 0.0398386  |
| 0.0771765 | 1 | 656  | 17 | 0.0412157  |
| 0.0739176 | 1 | 630  | 18 | 0.0356544  |
| 0.0664706 | 1 | 565  | 15 | 0.0489751  |
| 0.13429   | 1 | 1142 | 30 | 0.0165163  |
| 0.108824  | 1 | 925  | 25 | 0.0144948  |
| 0.0712271 | 1 | 606  | 17 | 0.0396179  |
| 0.0747059 | 1 | 635  | 18 | 0.0458855  |
| 0.067477  | 1 | 594  | 17 | 0.0422044  |

|           |   |      |    |            |
|-----------|---|------|----|------------|
| 0.0707059 | 1 | 601  | 17 | 0.0493724  |
| 0.0756727 | 1 | 838  | 23 | 0.0230222  |
| 0.0929412 | 1 | 790  | 22 | 0.0495048  |
| 0.0535977 | 1 | 619  | 18 | 0.0432549  |
| 0.0316398 | 1 | 487  | 13 | 0.048878   |
| 0.0636694 | 1 | 980  | 27 | 0.0332445  |
| 0.121294  | 1 | 1031 | 27 | 0.0167458  |
| 0.0157875 | 1 | 457  | 13 | 0.0456471  |
| 0.0718193 | 1 | 617  | 15 | 0.0438198  |
| 0.0635294 | 1 | 540  | 13 | 0.0493812  |
| 0.0925882 | 1 | 787  | 22 | 0.0461856  |
| 0.0770588 | 1 | 655  | 18 | 0.0496813  |
| 0.117412  | 1 | 998  | 27 | 0.0303049  |
| 0.0765882 | 1 | 651  | 19 | 0.0465299  |
| 0.0867059 | 1 | 737  | 19 | 0.0211861  |
| 0.0802353 | 1 | 682  | 19 | 0.0210007  |
| 0.087709  | 1 | 750  | 20 | 0.00946311 |
| 0.0683663 | 1 | 598  | 12 | 0.0462651  |
| 0.0909303 | 1 | 778  | 18 | 0.0217246  |
| 0.05117   | 1 | 855  | 21 | 0.0237196  |
| 0.0570354 | 1 | 728  | 20 | 0.0393973  |
| 0.0703529 | 1 | 598  | 16 | 0.0399799  |
| 0.072     | 1 | 612  | 13 | 0.0467241  |
| 0.0773572 | 1 | 658  | 16 | 0.0427782  |
| 0.113449  | 1 | 965  | 26 | 0.0189351  |
| 0.0892939 | 1 | 784  | 22 | 0.04811    |
| 0.0704706 | 1 | 599  | 12 | 0.0382232  |
| 0.069425  | 1 | 594  | 11 | 0.0460444  |
| 0.0800079 | 1 | 806  | 16 | 0.0455324  |
| 0.0750146 | 1 | 644  | 18 | 0.0419396  |
| 0.0639269 | 1 | 644  | 18 | 0.0419396  |
| 0.072502  | 1 | 632  | 18 | 0.04811    |
| 0.0701198 | 1 | 597  | 12 | 0.0454     |
| 0.0412954 | 1 | 635  | 18 | 0.0274889  |
| 0.0898295 | 1 | 764  | 22 | 0.0382938  |
| 0.0932941 | 1 | 793  | 22 | 0.0317438  |
| 0.100235  | 1 | 852  | 16 | 0.0486573  |
| 0.060117  | 1 | 812  | 23 | 0.0365636  |
| 0.0357033 | 1 | 582  | 14 | 0.0444113  |
| 0.0972919 | 1 | 873  | 24 | 0.0253527  |
| 0.0716218 | 1 | 609  | 17 | 0.0458678  |
| 0.0451043 | 1 | 720  | 15 | 0.0227044  |
| 0.112353  | 1 | 955  | 24 | 0.0172755  |
| 0.235765  | 1 | 2004 | 55 | 0.0150244  |
| 0.0685549 | 1 | 593  | 16 | 0.0439876  |
| 0.1       | 1 | 850  | 24 | 0.0232517  |
| 0.0704655 | 1 | 601  | 17 | 0.0401564  |

|           |          |      |    |            |
|-----------|----------|------|----|------------|
| 0.0701176 | 1        | 596  | 14 | 0.0494165  |
| 0.0609557 | 1        | 597  | 13 | 0.0480924  |
| 0.0947901 | 1        | 806  | 23 | 0.0299253  |
| 0.0872941 | 0.920596 | 806  | 23 | 0.0299253  |
| 0.0628272 | 1        | 612  | 17 | 0.0286277  |
| 0.0711212 | 1        | 628  | 12 | 0.047598   |
| 0.132291  | 1        | 1125 | 32 | 0.0338094  |
| 0.0568009 | 1        | 598  | 17 | 0.0167458  |
| 0.0866261 | 1        | 912  | 25 | 0.0317526  |
| 0.142588  | 1        | 1212 | 34 | 0.00910118 |
| 0.0843529 | 1        | 717  | 20 | 0.0331562  |
| 0.0707059 | 1        | 601  | 17 | 0.0451969  |
| 0.119882  | 1        | 1019 | 25 | 0.0198973  |
| 0.104565  | 1        | 891  | 25 | 0.0230928  |
| 0.04089   | 1        | 351  | 10 | 0.0475716  |
| 0.0877647 | 1        | 746  | 21 | 0.0486838  |
| 0.0678723 | 1        | 593  | 17 | 0.0489928  |
| 0.0878824 | 1        | 747  | 21 | 0.0263325  |
| 0.0456615 | 1        | 652  | 18 | 0.0492311  |
| 0.0751765 | 1        | 639  | 18 | 0.0297929  |
| 0.0681898 | 1        | 585  | 10 | 0.0151392  |
| 0.0723529 | 1        | 615  | 11 | 0.0454529  |
| 0.0727059 | 1        | 618  | 16 | 0.0294928  |
| 0.111568  | 1        | 949  | 24 | 0.0484278  |
| 0.0745882 | 1        | 634  | 18 | 0.0191381  |
| 0.0857009 | 1        | 730  | 21 | 0.0320351  |
| 0.0764706 | 1        | 650  | 18 | 0.0327943  |
| 0.098     | 1        | 833  | 20 | 0.0478982  |
| 0.111412  | 1        | 947  | 26 | 0.0237461  |
| 0.0742353 | 1        | 631  | 18 | 0.0317173  |
| 0.0812941 | 1        | 691  | 20 | 0.0407302  |
| 0.158591  | 1        | 1355 | 36 | 0.019553   |
| 0.093633  | 1        | 800  | 20 | 0.0195177  |
| 0.0519601 | 1        | 448  | 13 | 0.0472096  |
| 0.104118  | 1        | 885  | 25 | 0.04811    |
| 0.0820495 | 1        | 703  | 20 | 0.0257058  |
| 0.109529  | 1        | 931  | 26 | 0.0308169  |
| 0.0775294 | 1        | 659  | 14 | 0.0433696  |
| 0.139529  | 1        | 1186 | 34 | 0.0272417  |
| 0.0718824 | 1        | 611  | 17 | 0.0489486  |
| 0.148941  | 1        | 1266 | 36 | 0.0154658  |
| 0.104824  | 1        | 891  | 25 | 0.0245847  |
| 0.103387  | 1        | 879  | 24 | 0.0492311  |
| 0.126706  | 1        | 1077 | 31 | 0.0493547  |
| 0.0737647 | 1        | 627  | 18 | 0.0457707  |
| 0.0978824 | 1        | 832  | 23 | 0.0338271  |
| 0.145529  | 1        | 1237 | 28 | 0.0191028  |

|           |   |      |    |           |
|-----------|---|------|----|-----------|
| 0.0430717 | 1 | 608  | 17 | 0.0490899 |
| 0.130471  | 1 | 1109 | 31 | 0.0440935 |
| 0.0383621 | 1 | 905  | 25 | 0.0292986 |
| 0.0447204 | 1 | 1055 | 30 | 0.0297841 |
| 0.0696298 | 1 | 600  | 17 | 0.040024  |
| 0.0630673 | 1 | 542  | 15 | 0.0323529 |
| 0.0516667 | 1 | 837  | 23 | 0.0217599 |
| 0.047037  | 1 | 762  | 21 | 0.0298017 |
| 0.0875294 | 1 | 744  | 16 | 0.0409774 |
| 0.131412  | 1 | 1117 | 30 | 0.0195706 |
| 0.117529  | 1 | 999  | 28 | 0.0309317 |
| 0.0658894 | 1 | 1119 | 28 | 0.0391236 |
| 0.0790588 | 1 | 672  | 19 | 0.0416483 |
| 0.147882  | 1 | 1257 | 36 | 0.0152363 |
| 0.0689493 | 1 | 588  | 16 | 0.0498755 |
| 0.0686916 | 1 | 588  | 16 | 0.0498755 |
| 0.0685882 | 1 | 583  | 14 | 0.0495136 |
| 0.0857657 | 1 | 858  | 23 | 0.0281951 |
| 0.119059  | 1 | 1012 | 28 | 0.0343038 |
| 0.0895294 | 1 | 761  | 21 | 0.0490546 |
| 0.132235  | 1 | 1124 | 29 | 0.0226603 |
| 0.057606  | 1 | 796  | 23 | 0.0319292 |
| 0.0408887 | 1 | 565  | 16 | 0.0435903 |
| 0.0400384 | 1 | 625  | 16 | 0.0490634 |
| 0.0709412 | 1 | 603  | 16 | 0.0493547 |
| 0.0437583 | 1 | 1250 | 34 | 0.0204093 |
| 0.0928376 | 1 | 2652 | 72 | 0.0164545 |
| 0.0413779 | 1 | 1182 | 30 | 0.0234459 |
| 0.020794  | 1 | 594  | 12 | 0.0401123 |
| 0.0257999 | 1 | 737  | 21 | 0.0473067 |
| 0.0282504 | 1 | 807  | 21 | 0.0328825 |
| 0.0797452 | 1 | 2278 | 58 | 0.0145213 |
| 0.0408528 | 1 | 1167 | 33 | 0.0101693 |
| 0.102488  | 1 | 898  | 21 | 0.0297399 |
| 0.0216341 | 1 | 618  | 16 | 0.0478099 |
| 0.0696471 | 1 | 592  | 17 | 0.0480394 |
| 0.0874118 | 1 | 743  | 17 | 0.0452234 |
| 0.109294  | 1 | 929  | 27 | 0.032397  |
| 0.0800333 | 1 | 1057 | 30 | 0.033165  |
| 0.0230853 | 1 | 907  | 24 | 0.0342155 |
| 0.0233653 | 1 | 918  | 26 | 0.0417807 |
| 0.020591  | 1 | 809  | 23 | 0.0322205 |
| 0.0216346 | 1 | 850  | 24 | 0.0405007 |
| 0.0302375 | 1 | 1188 | 33 | 0.0322999 |
| 0.0212782 | 1 | 836  | 23 | 0.0254763 |
| 0.0232381 | 1 | 913  | 26 | 0.0227397 |
| 0.0487865 | 1 | 995  | 27 | 0.0216363 |

|           |          |      |    |            |
|-----------|----------|------|----|------------|
| 0.0551115 | 1        | 1124 | 31 | 0.00684133 |
| 0.0723529 | 1        | 615  | 34 | 0.0425752  |
| 0.0904706 | 1        | 769  | 22 | 0.0344715  |
| 0.104588  | 1        | 889  | 24 | 0.0298988  |
| 0.142588  | 1        | 1212 | 34 | 0.0102399  |
| 0.0487059 | 1        | 414  | 12 | 0.0457619  |
| 0.07      | 1        | 595  | 16 | 0.0422397  |
| 0.0779984 | 1        | 664  | 19 | 0.0414011  |
| 0.0360266 | 0.826203 | 374  | 11 | 0.0311347  |
| 0.168588  | 1        | 1433 | 40 | 0.0167635  |
| 0.0992941 | 1        | 844  | 24 | 0.0239491  |
| 0.0373797 | 1        | 606  | 16 | 0.0451881  |
| 0.0442265 | 1        | 717  | 20 | 0.0456207  |
| 0.0874118 | 1        | 743  | 20 | 0.030967   |
| 0.0469208 | 1        | 992  | 28 | 0.0237637  |
| 0.070665  | 1        | 1494 | 42 | 0.00996628 |
| 0.0685882 | 1        | 583  | 10 | 0.0452587  |
| 0.0689412 | 1        | 586  | 16 | 0.0459738  |
| 0.0691765 | 1        | 588  | 17 | 0.0456207  |
| 0.153412  | 1        | 1304 | 37 | 0.0149185  |
| 0.0765882 | 1        | 651  | 17 | 0.0423898  |
| 0.0875294 | 1        | 744  | 21 | 0.0487456  |
| 0.090662  | 1        | 1134 | 31 | 0.0471125  |
| 0.113412  | 1        | 964  | 27 | 0.0320881  |
| 0.0722764 | 1        | 615  | 17 | 0.0495401  |
| 0.0750588 | 1        | 638  | 18 | 0.045912   |
| 0.0988235 | 1        | 840  | 23 | 0.0299518  |
| 0.074     | 1        | 629  | 18 | 0.036184   |
| 0.0603234 | 1        | 873  | 25 | 0.0259794  |
| 0.0521686 | 1        | 593  | 17 | 0.0499991  |
| 0.0514621 | 1        | 755  | 17 | 0.04811    |
| 0.0603912 | 1        | 886  | 25 | 0.0312318  |
| 0.0539969 | 0.719875 | 639  | 18 | 0.0370403  |
| 0.083703  | 1        | 717  | 19 | 0.0330238  |
| 0.117412  | 1        | 998  | 27 | 0.0451881  |
| 0.0727059 | 1        | 618  | 18 | 0.0493812  |
| 0.0696471 | 1        | 592  | 17 | 0.0494077  |
| 0.107412  | 1        | 913  | 26 | 0.0325559  |
| 0.0701176 | 1        | 596  | 17 | 0.0447114  |
| 0.0537159 | 1        | 644  | 18 | 0.0324853  |
| 0.0902353 | 1        | 767  | 22 | 0.0226691  |
| 0.0857647 | 1        | 729  | 21 | 0.0473509  |
| 0.0730588 | 1        | 621  | 14 | 0.0335181  |
| 0.0730588 | 1        | 621  | 18 | 0.0363076  |
| 0.11273   | 1        | 1184 | 32 | 0.0211861  |
| 0.139294  | 1        | 1184 | 32 | 0.0211861  |
| 0.0699439 | 1        | 599  | 13 | 0.0487368  |

|           |   |      |    |           |
|-----------|---|------|----|-----------|
| 0.0788235 | 1 | 670  | 19 | 0.0472361 |
| 0.0779817 | 1 | 663  | 15 | 0.043608  |
| 0.058288  | 1 | 685  | 15 | 0.0235872 |
| 0.0651085 | 1 | 858  | 24 | 0.0168164 |
| 0.0369333 | 1 | 620  | 18 | 0.0486397 |
| 0.126706  | 1 | 1077 | 28 | 0.0234989 |
| 0.0757327 | 1 | 646  | 18 | 0.0447291 |
| 0.1       | 1 | 850  | 24 | 0.0203828 |
| 0.0728235 | 1 | 619  | 18 | 0.0417983 |
| 0.0772941 | 1 | 657  | 13 | 0.0399357 |
| 0.0950041 | 1 | 812  | 23 | 0.0399534 |
| 0.0618824 | 1 | 526  | 15 | 0.0466535 |
| 0.109059  | 1 | 927  | 19 | 0.0289808 |
| 0.0716366 | 1 | 615  | 17 | 0.0298282 |
| 0.114014  | 1 | 982  | 22 | 0.039821  |
| 0.0711655 | 1 | 657  | 18 | 0.0337565 |
| 0.0938824 | 1 | 798  | 20 | 0.0289455 |
| 0.0701176 | 1 | 596  | 15 | 0.046115  |
| 0.0655237 | 1 | 558  | 12 | 0.0341978 |
| 0.0656471 | 1 | 558  | 12 | 0.0341978 |
| 0.074     | 1 | 629  | 14 | 0.0353896 |
| 0.0593523 | 1 | 581  | 15 | 0.0496195 |
| 0.0528181 | 1 | 596  | 17 | 0.0327413 |
| 0.100729  | 1 | 857  | 24 | 0.0265885 |
| 0.0723429 | 1 | 616  | 15 | 0.0475451 |
| 0.0768235 | 1 | 653  | 19 | 0.0331827 |
| 0.0450219 | 1 | 596  | 17 | 0.0425575 |
| 0.112298  | 1 | 978  | 25 | 0.0223425 |
| 0.0988161 | 1 | 843  | 22 | 0.0326177 |
| 0.0691595 | 1 | 590  | 16 | 0.0484719 |
| 0.0843966 | 1 | 721  | 20 | 0.0203828 |
| 0.0638253 | 1 | 602  | 17 | 0.0454353 |
| 0.0905776 | 1 | 770  | 18 | 0.0178404 |
| 0.0723529 | 1 | 615  | 17 | 0.0490987 |
| 0.0818672 | 1 | 698  | 16 | 0.0239932 |
| 0.138395  | 1 | 1183 | 28 | 0.0116877 |
| 0.0704804 | 1 | 600  | 17 | 0.0404124 |
| 0.0698824 | 1 | 594  | 16 | 0.0463445 |
| 0.0901675 | 1 | 829  | 21 | 0.0298459 |
| 0.0721176 | 1 | 613  | 10 | 0.0403506 |
| 0.0454545 | 1 | 715  | 16 | 0.034445  |
| 0.0755116 | 1 | 642  | 18 | 0.0231016 |
| 0.0702353 | 1 | 597  | 17 | 0.0342331 |
| 0.0808235 | 1 | 687  | 14 | 0.0475716 |
| 0.0824609 | 1 | 701  | 16 | 0.0316555 |
| 0.131604  | 1 | 1126 | 24 | 0.0290867 |
| 0.0539685 | 1 | 597  | 12 | 0.0423015 |



|            |           |      |    |           |
|------------|-----------|------|----|-----------|
| 0.0674381  | 1         | 746  | 16 | 0.0304726 |
| 0.107076   | 1         | 917  | 26 | 0.0454794 |
| 0.0701176  | 1         | 596  | 14 | 0.0324412 |
| 0.0758338  | 1         | 648  | 17 | 0.0391324 |
| 0.0675474  | 1         | 588  | 17 | 0.036696  |
| 0.0718014  | 1         | 619  | 17 | 0.0469448 |
| 0.124633   | 1         | 1060 | 25 | 0.0223866 |
| 0.0406495  | 0.570492  | 610  | 15 | 0.0484808 |
| 0.0707497  | 1         | 603  | 17 | 0.0380731 |
| 0.0790588  | 1         | 672  | 17 | 0.0389294 |
| 0.00288895 | 0.0354365 | 1157 | 29 | 0.0285394 |
| 0.0856471  | 1         | 728  | 19 | 0.0330767 |
| 0.0705574  | 1         | 619  | 15 | 0.0410568 |
| 0.0838629  | 1         | 739  | 21 | 0.0424957 |
| 0.126353   | 1         | 1074 | 30 | 0.0199944 |
| 0.0587685  | 1         | 503  | 14 | 0.045859  |
| 0.115551   | 1         | 989  | 27 | 0.0126234 |
| 0.109529   | 1         | 931  | 25 | 0.0154305 |
| 0.0722353  | 1         | 614  | 17 | 0.0480394 |
| 0.0785882  | 1         | 668  | 19 | 0.0403948 |
| 0.196      | 1         | 1666 | 47 | 0.014486  |
| 0.0865882  | 1         | 736  | 21 | 0.0469007 |
| 0.0775294  | 1         | 659  | 18 | 0.0247083 |
| 0.0829326  | 1         | 707  | 21 | 0.0457531 |
| 0.108706   | 1         | 924  | 26 | 0.0113963 |
| 0.0783529  | 1         | 666  | 19 | 0.0402888 |
| 0.072      | 1         | 612  | 18 | 0.0490899 |
| 0.101765   | 1         | 865  | 24 | 0.0193411 |
| 0.097346   | 1         | 961  | 25 | 0.0337741 |
| 0.0793413  | 1         | 689  | 19 | 0.0289808 |
| 0.114706   | 0.994898  | 980  | 22 | 0.0278597 |
| 0.0958824  | 1         | 815  | 23 | 0.0336594 |
| 0.0701176  | 1         | 596  | 13 | 0.0475362 |
| 0.101294   | 1         | 861  | 24 | 0.0246818 |
| 0.0724348  | 1         | 617  | 17 | 0.0409774 |
| 0.0883529  | 1         | 751  | 21 | 0.0238432 |
| 0.0791765  | 1         | 673  | 16 | 0.0327854 |
| 0.0738824  | 1         | 628  | 18 | 0.0354602 |
| 0.110981   | 1         | 950  | 27 | 0.0340566 |
| 0.0744706  | 1         | 633  | 18 | 0.0465299 |
| 0.0563971  | 1         | 659  | 18 | 0.0451263 |
| 0.0774747  | 1         | 659  | 18 | 0.0451263 |
| 0.0688036  | 1         | 586  | 15 | 0.0417983 |
| 0.0788235  | 1         | 670  | 19 | 0.0462209 |
| 0.112833   | 1         | 961  | 27 | 0.045038  |
| 0.073913   | 1         | 629  | 18 | 0.0489398 |
| 0.0908235  | 1         | 772  | 22 | 0.0496195 |

|           |          |      |    |            |
|-----------|----------|------|----|------------|
| 0.0756471 | 1        | 643  | 19 | 0.0396886  |
| 0.0962136 | 1        | 836  | 17 | 0.0202857  |
| 0.078608  | 1        | 768  | 22 | 0.0212567  |
| 0.0934884 | 1        | 804  | 19 | 0.0341802  |
| 0.0778726 | 1        | 675  | 19 | 0.0484366  |
| 0.0734708 | 1        | 627  | 18 | 0.0489398  |
| 0.118124  | 1        | 1005 | 25 | 0.0432637  |
| 0.0218841 | 0.18607  | 1005 | 25 | 0.0432637  |
| 0.130235  | 1        | 1107 | 24 | 0.0161367  |
| 0.0686885 | 1        | 607  | 17 | 0.0486573  |
| 0.0914118 | 1        | 777  | 22 | 0.0458943  |
| 0.116118  | 0.853068 | 1157 | 30 | 0.0157748  |
| 0.120465  | 1        | 1026 | 28 | 0.0165869  |
| 0.0377289 | 1        | 614  | 12 | 0.0483219  |
| 0.0696471 | 1        | 592  | 14 | 0.045144   |
| 0.0690701 | 1        | 592  | 14 | 0.045144   |
| 0.068363  | 1        | 583  | 16 | 0.0471831  |
| 0.0628235 | 1        | 534  | 10 | 0.0425752  |
| 0.107647  | 1        | 915  | 22 | 0.0305521  |
| 0.0930042 | 1        | 795  | 18 | 0.0315849  |
| 0.0653216 | 1        | 586  | 16 | 0.0484984  |
| 0.0977647 | 1        | 831  | 20 | 0.0267121  |
| 0.0736471 | 1        | 626  | 18 | 0.0494783  |
| 0.0688235 | 1        | 585  | 11 | 0.0455589  |
| 0.0862353 | 1        | 733  | 21 | 0.0226779  |
| 0.0638354 | 1        | 962  | 27 | 0.019553   |
| 0.139166  | 1        | 1298 | 32 | 0.00773291 |
| 0.0601987 | 1        | 515  | 14 | 0.0435639  |
| 0.0903529 | 1        | 768  | 21 | 0.0290867  |
| 0.0831765 | 1        | 707  | 20 | 0.0467947  |
| 0.0723871 | 1        | 739  | 21 | 0.0384704  |
| 0.103647  | 1        | 881  | 24 | 0.0400064  |
| 0.0866981 | 1        | 992  | 22 | 0.0305874  |
| 0.0991765 | 1        | 843  | 24 | 0.0386028  |
| 0.0702353 | 1        | 597  | 17 | 0.043608   |
| 0.108504  | 1        | 948  | 22 | 0.0337741  |
| 0.0752941 | 1        | 640  | 17 | 0.0326883  |
| 0.0712941 | 1        | 606  | 17 | 0.0494783  |
| 0.0709844 | 1        | 605  | 17 | 0.0478982  |
| 0.0896471 | 1        | 762  | 20 | 0.0346657  |
| 0.072     | 1        | 612  | 17 | 0.0435639  |
| 0.0940762 | 1        | 802  | 21 | 0.0325118  |
| 0.0685882 | 1        | 583  | 15 | 0.0471655  |
| 0.0694036 | 1        | 590  | 17 | 0.049134   |
| 0.110308  | 1        | 961  | 27 | 0.0233223  |
| 0.133514  | 1        | 1135 | 27 | 0.0133914  |
| 0.0752801 | 1        | 645  | 15 | 0.0417366  |

|           |          |      |    |           |
|-----------|----------|------|----|-----------|
| 0.0704706 | 1        | 599  | 17 | 0.0475098 |
| 0.0957647 | 1        | 814  | 23 | 0.0114228 |
| 0.0735906 | 1        | 637  | 14 | 0.0444378 |
| 0.0815395 | 1        | 697  | 20 | 0.0316555 |
| 0.0835583 | 0.998598 | 713  | 20 | 0.0430783 |
| 0.0756155 | 1        | 645  | 18 | 0.049902  |
| 0.0547059 | 1        | 465  | 11 | 0.0334652 |
| 0.108588  | 1        | 923  | 20 | 0.042787  |
| 0.0661118 | 1        | 564  | 16 | 0.0454794 |
| 0.0878824 | 1        | 747  | 20 | 0.0101605 |
| 0.0716471 | 1        | 609  | 16 | 0.0477128 |
| 0.124824  | 1        | 1061 | 24 | 0.0295546 |
| 0.0756471 | 1        | 643  | 12 | 0.0239226 |
| 0.0688515 | 1        | 687  | 16 | 0.0401388 |
| 0.0714037 | 1        | 614  | 17 | 0.0417366 |
| 0.0747916 | 1        | 637  | 14 | 0.0438287 |
| 0.0603248 | 1        | 832  | 21 | 0.0198884 |
| 0.0977788 | 1        | 832  | 21 | 0.0198884 |
| 0.0475638 | 1        | 656  | 12 | 0.0299077 |
| 0.0770948 | 1        | 656  | 12 | 0.0299077 |
| 0.0729412 | 1        | 620  | 12 | 0.0409597 |
| 0.104385  | 1        | 895  | 19 | 0.0163574 |
| 0.0996471 | 1        | 847  | 24 | 0.0313819 |
| 0.0763529 | 1        | 649  | 13 | 0.0413128 |
| 0.0696099 | 1        | 853  | 23 | 0.0338094 |
| 0.0545944 | 1        | 669  | 16 | 0.0487544 |
| 0.110824  | 1        | 942  | 26 | 0.031479  |
| 0.0755294 | 1        | 642  | 18 | 0.0431931 |
| 0.133154  | 1        | 1139 | 31 | 0.0146713 |
| 0.0852941 | 0.987738 | 734  | 20 | 0.0126675 |
| 0.0729412 | 1        | 620  | 17 | 0.0470949 |
| 0.0787059 | 1        | 669  | 19 | 0.0420632 |
| 0.0725882 | 1        | 617  | 28 | 0.0433961 |
| 0.0518304 | 1        | 715  | 20 | 0.0430783 |
| 0.0959258 | 1        | 817  | 17 | 0.0475451 |
| 0.0874118 | 1        | 743  | 21 | 0.0491428 |
| 0.0974118 | 1        | 828  | 19 | 0.0234724 |
| 0.0705882 | 1        | 600  | 17 | 0.0471567 |
| 0.0685882 | 1        | 583  | 10 | 0.0450027 |
| 0.0685157 | 1        | 583  | 10 | 0.0450027 |
| 0.0693954 | 1        | 590  | 15 | 0.0477746 |
| 0.0574923 | 1        | 597  | 17 | 0.0452058 |
| 0.0439766 | 1        | 376  | 11 | 0.0475451 |
| 0.108235  | 1        | 920  | 23 | 0.0366166 |
| 0.0445624 | 1        | 613  | 18 | 0.0456207 |
| 0.0724909 | 1        | 619  | 13 | 0.0423103 |
| 0.0967059 | 1        | 822  | 24 | 0.0265356 |

|           |          |      |    |           |
|-----------|----------|------|----|-----------|
| 0.0720605 | 1        | 619  | 12 | 0.0298724 |
| 0.0951765 | 1        | 809  | 21 | 0.0399799 |
| 0.0761176 | 1        | 647  | 18 | 0.0441553 |
| 0.130235  | 1        | 1107 | 26 | 0.0110785 |
| 0.0531591 | 1        | 785  | 23 | 0.0426899 |
| 0.0688609 | 0.924841 | 785  | 23 | 0.0426899 |
| 0.0909412 | 1        | 773  | 20 | 0.0210183 |
| 0.0725522 | 1        | 618  | 16 | 0.0459649 |
| 0.0709412 | 1        | 603  | 17 | 0.0429812 |
| 0.102299  | 1        | 872  | 25 | 0.0176021 |
| 0.0722353 | 1        | 614  | 15 | 0.0454971 |
| 0.0517608 | 1        | 463  | 13 | 0.0213185 |
| 0.118614  | 0.972502 | 1091 | 28 | 0.0162691 |
| 0.0588441 | 1        | 505  | 14 | 0.0490634 |
| 0.0637647 | 1        | 542  | 15 | 0.0470331 |
| 0.222718  | 1        | 1898 | 44 | 0.0105489 |
| 0.0857377 | 1        | 731  | 21 | 0.0228103 |
| 0.0969412 | 1        | 824  | 23 | 0.043811  |
| 0.0694118 | 1        | 590  | 16 | 0.048366  |
| 0.107468  | 1        | 921  | 20 | 0.0341802 |
| 0.114718  | 1        | 979  | 24 | 0.0127381 |
| 0.0493735 | 1        | 796  | 22 | 0.0339242 |
| 0.086     | 1        | 731  | 21 | 0.0439346 |
| 0.0411634 | 0.511662 | 686  | 19 | 0.0384262 |
| 0.0806774 | 1        | 686  | 19 | 0.0384262 |
| 0.176118  | 1        | 1497 | 39 | 0.0312318 |
| 0.040955  | 1        | 669  | 19 | 0.0105577 |
| 0.0809412 | 1        | 688  | 20 | 0.0453382 |
| 0.0743529 | 1        | 632  | 17 | 0.0460885 |
| 0.0692814 | 1        | 590  | 12 | 0.0467241 |
| 0.0370921 | 1        | 874  | 22 | 0.0176286 |
| 0.0669261 | 1        | 602  | 12 | 0.0456383 |
| 0.0708152 | 1        | 602  | 12 | 0.0456383 |
| 0.100117  | 1        | 854  | 24 | 0.0375523 |
| 0.0904706 | 1        | 769  | 22 | 0.0340919 |
| 0.0386238 | 1        | 641  | 14 | 0.0391324 |
| 0.124353  | 1        | 1057 | 25 | 0.030967  |
| 0.0804706 | 1        | 684  | 19 | 0.0454794 |
| 0.0760463 | 1        | 874  | 25 | 0.0479335 |
| 0.0708069 | 1        | 602  | 17 | 0.0491958 |
| 0.0885882 | 1        | 753  | 21 | 0.0219541 |
| 0.0716471 | 1        | 609  | 17 | 0.0498755 |
| 0.0552941 | 1        | 470  | 13 | 0.0466447 |
| 0.142235  | 1        | 1209 | 29 | 0.0115729 |
| 0.0718824 | 1        | 611  | 18 | 0.0486044 |
| 0.154353  | 1        | 1312 | 32 | 0.0126675 |
| 0.112706  | 1        | 958  | 27 | 0.0336682 |

|             |           |      |    |            |
|-------------|-----------|------|----|------------|
| 0.0773936   | 1         | 658  | 19 | 0.0486926  |
| 0.13        | 1         | 1105 | 29 | 0.0220335  |
| 0.122941    | 1         | 1045 | 23 | 0.0141593  |
| 0.0890588   | 1         | 757  | 21 | 0.0389294  |
| 0.100706    | 1         | 856  | 25 | 0.02989    |
| 0.0945158   | 1         | 810  | 22 | 0.0433078  |
| 0.0692443   | 1         | 591  | 13 | 0.0486397  |
| 0.000823529 | 0.0102489 | 683  | 13 | 0.0299518  |
| 0.072924    | 1         | 620  | 17 | 0.022519   |
| 0.0629412   | 1         | 535  | 10 | 0.0229692  |
| 0.101412    | 1         | 862  | 24 | 0.0103017  |
| 0.137647    | 1         | 1170 | 32 | 0.0129323  |
| 0.0847059   | 1         | 720  | 20 | 0.0332445  |
| 0.130588    | 1         | 1110 | 30 | 0.00789181 |
| 0.081275    | 1         | 691  | 18 | 0.0301637  |
| 0.0396149   | 1         | 609  | 13 | 0.0223425  |
| 0.0498824   | 1         | 424  | 12 | 0.0480924  |
| 0.072       | 1         | 612  | 11 | 0.0486838  |
| 0.066879    | 1         | 777  | 20 | 0.0495313  |
| 0.0394522   | 1         | 605  | 17 | 0.0487279  |
| 0.0842353   | 1         | 716  | 19 | 0.0276213  |
| 0.0915842   | 1         | 851  | 19 | 0.0100722  |
| 0.0770125   | 1         | 795  | 21 | 0.0286188  |
| 0.124163    | 1         | 1057 | 25 | 0.00946311 |
| 0.0864967   | 1         | 736  | 21 | 0.0312053  |
| 0.0703529   | 1         | 598  | 16 | 0.0360781  |
| 0.0742353   | 1         | 631  | 18 | 0.0327943  |
| 0.107529    | 1         | 914  | 24 | 0.0232341  |
| 0.070997    | 1         | 611  | 17 | 0.0349658  |
| 0.078892    | 1         | 675  | 19 | 0.0429194  |
| 0.0702353   | 1         | 597  | 17 | 0.0484455  |
| 0.0655287   | 1         | 572  | 16 | 0.031885   |
| 0.15041     | 1         | 1303 | 36 | 0.00328384 |
| 0.0765882   | 1         | 651  | 19 | 0.0457707  |
| 0.0693807   | 1         | 605  | 17 | 0.0433961  |
| 0.09029     | 0.989704  | 777  | 15 | 0.0222277  |
| 0.0752941   | 1         | 640  | 18 | 0.0443407  |
| 0.0687059   | 1         | 584  | 17 | 0.0480394  |
| 0.133294    | 1         | 1133 | 30 | 0.0381261  |
| 0.112824    | 1         | 959  | 27 | 0.0471125  |
| 0.0823529   | 1         | 700  | 15 | 0.0423545  |
| 0.0952941   | 1         | 810  | 22 | 0.0292015  |
| 0.107412    | 1         | 913  | 25 | 0.0224837  |
| 0.0531765   | 1         | 452  | 13 | 0.0335446  |
| 0.0896074   | 1         | 776  | 22 | 0.0434403  |
| 0.090941    | 1         | 776  | 22 | 0.0434403  |
| 0.117412    | 1         | 998  | 28 | 0.0216716  |

|           |   |      |    |           |
|-----------|---|------|----|-----------|
| 0.107529  | 1 | 914  | 17 | 0.0289808 |
| 0.0712698 | 1 | 609  | 17 | 0.0376847 |
| 0.0701176 | 1 | 596  | 17 | 0.0386734 |
| 0.105484  | 1 | 906  | 25 | 0.0279038 |
| 0.0834118 | 1 | 709  | 20 | 0.0343744 |
| 0.0542656 | 1 | 832  | 23 | 0.0316643 |
| 0.0478824 | 1 | 407  | 12 | 0.0481983 |
| 0.0703529 | 1 | 598  | 17 | 0.0389206 |
| 0.0381429 | 1 | 617  | 14 | 0.0480659 |
| 0.0366592 | 1 | 593  | 16 | 0.0421603 |
| 0.209647  | 1 | 1782 | 42 | 0.0227397 |
| 0.0549459 | 1 | 706  | 19 | 0.0434314 |
| 0.0785882 | 1 | 668  | 19 | 0.0481012 |
| 0.0545882 | 1 | 464  | 13 | 0.0415247 |
| 0.0696471 | 1 | 592  | 17 | 0.0407655 |
| 0.136556  | 1 | 1161 | 29 | 0.0236578 |
| 0.0828827 | 1 | 705  | 20 | 0.0492311 |
| 0.0723653 | 1 | 618  | 18 | 0.0469183 |
| 0.111007  | 1 | 948  | 27 | 0.0265444 |
| 0.0725626 | 1 | 617  | 17 | 0.0460091 |
| 0.0839704 | 1 | 714  | 20 | 0.0427782 |
| 0.130941  | 1 | 1113 | 31 | 0.0218834 |
| 0.115569  | 1 | 991  | 28 | 0.0388764 |
| 0.108118  | 1 | 919  | 26 | 0.0132148 |
| 0.0708235 | 1 | 602  | 12 | 0.0469448 |
| 0.0865882 | 1 | 736  | 18 | 0.0347716 |
| 0.0700375 | 1 | 597  | 17 | 0.0409774 |
| 0.10248   | 1 | 880  | 20 | 0.0338183 |
| 0.106235  | 1 | 903  | 25 | 0.0414982 |
| 0.107412  | 1 | 913  | 26 | 0.0210183 |
| 0.0892941 | 1 | 759  | 17 | 0.0299518 |
| 0.06715   | 1 | 602  | 17 | 0.0447909 |
| 0.0671415 | 1 | 575  | 16 | 0.0487279 |
| 0.157987  | 1 | 1353 | 35 | 0.0265267 |
| 0.0819904 | 1 | 697  | 16 | 0.048216  |
| 0.0704225 | 1 | 605  | 17 | 0.0493459 |
| 0.0697647 | 1 | 593  | 12 | 0.045144  |
| 0.0784706 | 1 | 667  | 19 | 0.0462827 |
| 0.0578993 | 1 | 667  | 19 | 0.0462827 |
| 0.114236  | 1 | 979  | 28 | 0.0207888 |
| 0.112019  | 1 | 960  | 27 | 0.0338183 |
| 0.0677966 | 1 | 600  | 10 | 0.0422927 |
| 0.0714451 | 1 | 616  | 12 | 0.0475362 |
| 0.0368078 | 1 | 660  | 18 | 0.0427076 |
| 0.082     | 1 | 697  | 20 | 0.0466182 |
| 0.0958824 | 1 | 815  | 23 | 0.0389117 |
| 0.122235  | 1 | 1039 | 27 | 0.0340389 |

|           |          |      |    |            |
|-----------|----------|------|----|------------|
| 0.0929412 | 1        | 790  | 23 | 0.0319027  |
| 0.0769412 | 1        | 654  | 12 | 0.0463092  |
| 0.0723769 | 1        | 616  | 15 | 0.0343391  |
| 0.0384343 | 1        | 596  | 14 | 0.0476422  |
| 0.0394706 | 1        | 337  | 10 | 0.0485514  |
| 0.0923728 | 1        | 786  | 22 | 0.0456825  |
| 0.0411356 | 1        | 639  | 16 | 0.0455324  |
| 0.0725882 | 1        | 617  | 12 | 0.0483837  |
| 0.0883355 | 1        | 752  | 21 | 0.0477393  |
| 0.0566787 | 0.644947 | 752  | 21 | 0.0477393  |
| 0.109421  | 1        | 1072 | 30 | 0.0154217  |
| 0.126118  | 1        | 1072 | 30 | 0.0154217  |
| 0.123176  | 1        | 1047 | 27 | 0.0129941  |
| 0.115881  | 1        | 988  | 26 | 0.0219364  |
| 0.122941  | 1        | 1045 | 29 | 0.0327678  |
| 0.0764899 | 1        | 652  | 18 | 0.0305697  |
| 0.0970202 | 1        | 827  | 19 | 0.0401564  |
| 0.124118  | 1        | 1055 | 27 | 0.0225896  |
| 0.131294  | 1        | 1116 | 31 | 0.0229074  |
| 0.0664706 | 1        | 565  | 16 | 0.0468653  |
| 0.0748235 | 1        | 636  | 18 | 0.0440229  |
| 0.107765  | 1        | 916  | 26 | 0.0293515  |
| 0.0921176 | 1        | 783  | 22 | 0.0325824  |
| 0.128118  | 1        | 1089 | 30 | 0.00929539 |
| 0.0743529 | 1        | 632  | 18 | 0.0480394  |
| 0.129882  | 1        | 1104 | 31 | 0.0237372  |
| 0.131059  | 1        | 1114 | 32 | 0.0233488  |
| 0.119294  | 1        | 1014 | 28 | 0.0235165  |
| 0.0695294 | 1        | 591  | 12 | 0.0403948  |
| 0.0796471 | 0.559504 | 1210 | 33 | 0.0155188  |
| 0.128824  | 1        | 1095 | 30 | 0.0164898  |
| 0.0748235 | 0.604563 | 1052 | 26 | 0.00693844 |
| 0.0455294 | 1        | 387  | 11 | 0.0474303  |
| 0.117721  | 1        | 1025 | 29 | 0.0125527  |
| 0.0707059 | 1        | 601  | 15 | 0.0416218  |
| 0.0752329 | 1        | 856  | 22 | 0.0314525  |
| 0.0879108 | 1        | 749  | 16 | 0.0498844  |
| 0.0924706 | 1        | 786  | 22 | 0.0285747  |
| 0.0485864 | 1        | 806  | 17 | 0.0441376  |
| 0.037555  | 1        | 623  | 18 | 0.0331827  |
| 0.0852941 | 1        | 725  | 20 | 0.033624   |
| 0.0885882 | 1        | 753  | 16 | 0.0212125  |
| 0.0693783 | 1        | 597  | 10 | 0.0381526  |
| 0.0783529 | 1        | 666  | 16 | 0.0416748  |
| 0.0695294 | 1        | 591  | 15 | 0.034904   |
| 0.0678117 | 1        | 608  | 16 | 0.04811    |
| 0.100588  | 1        | 855  | 24 | 0.0279744  |

|           |          |      |     |           |
|-----------|----------|------|-----|-----------|
| 0.106706  | 1        | 907  | 25  | 0.0320881 |
| 0.0917061 | 1        | 1067 | 30  | 0.0217687 |
| 0.0756471 | 1        | 643  | 18  | 0.0325118 |
| 0.0728454 | 1        | 628  | 17  | 0.0372698 |
| 0.051377  | 1        | 1054 | 29  | 0.0305521 |
| 0.0689291 | 1        | 587  | 15  | 0.0345245 |
| 0.0928235 | 1        | 789  | 22  | 0.034498  |
| 0.0729412 | 1        | 620  | 18  | 0.043405  |
| 0.0579526 | 1        | 501  | 14  | 0.04811   |
| 0.0723529 | 1        | 615  | 10  | 0.0481895 |
| 0.0416254 | 1        | 588  | 17  | 0.0463269 |
| 0.0802067 | 1        | 1133 | 32  | 0.0328472 |
| 0.0971765 | 1        | 826  | 23  | 0.0233312 |
| 0.126824  | 1        | 1078 | 22  | 0.0227221 |
| 0.0759285 | 1        | 646  | 11  | 0.0320351 |
| 0.0699342 | 1        | 595  | 16  | 0.0487456 |
| 0.10917   | 1        | 931  | 25  | 0.031735  |
| 0.0719508 | 1        | 620  | 11  | 0.0314525 |
| 0.0887609 | 1        | 755  | 21  | 0.0497431 |
| 0.0878824 | 1        | 747  | 21  | 0.0325559 |
| 0.0531765 | 0.941667 | 480  | 14  | 0.0431931 |
| 0.0712941 | 1        | 606  | 17  | 0.0428753 |
| 0.0365255 | 1        | 595  | 17  | 0.0410833 |
| 0.153364  | 1        | 1518 | 78  | 0.0168606 |
| 0.166498  | 1        | 1648 | 100 | 0.0167105 |
| 0.0603152 | 1        | 597  | 33  | 0.032397  |
| 0.0675645 | 1        | 587  | 15  | 0.0448615 |
| 0.0850437 | 0.900969 | 929  | 38  | 0.0320792 |
| 0.0838244 | 1        | 825  | 37  | 0.022572  |
| 0.11329   | 1        | 1115 | 75  | 0.0234371 |
| 0.103333  | 1        | 1017 | 69  | 0.0271976 |
| 0.102824  | 1        | 874  | 24  | 0.0317967 |
| 0.0753409 | 1        | 641  | 11  | 0.0363518 |
| 0.0677157 | 1        | 667  | 19  | 0.0285394 |
| 0.109239  | 1        | 1076 | 29  | 0.0236401 |
| 0.0919797 | 1        | 906  | 25  | 0.022007  |
| 0.0852503 | 1        | 756  | 17  | 0.0431578 |
| 0.144752  | 0.468109 | 2634 | 127 | 0.0168517 |
| 0.133365  | 1        | 1136 | 48  | 0.0340478 |
| 0.113994  | 1        | 971  | 58  | 0.0320351 |
| 0.0723215 | 1        | 619  | 18  | 0.0430077 |
| 0.119765  | 1        | 1018 | 24  | 0.0215568 |
| 0.1111    | 1        | 1108 | 23  | 0.0408803 |
| 0.068886  | 1        | 687  | 26  | 0.0343303 |
| 0.133661  | 1        | 1333 | 55  | 0.0159072 |
| 0.059528  | 1        | 507  | 15  | 0.0442347 |
| 0.0515562 | 1        | 598  | 14  | 0.0483219 |



|           |   |      |    |           |
|-----------|---|------|----|-----------|
| 0.101151  | 1 | 861  | 24 | 0.0485602 |
| 0.125529  | 1 | 1067 | 55 | 0.0206564 |
| 0.229176  | 1 | 1948 | 61 | 0.0234547 |
| 0.0708235 | 1 | 602  | 16 | 0.0490987 |
| 0.126588  | 1 | 1076 | 31 | 0.0388941 |
| 0.0825882 | 1 | 702  | 20 | 0.0208771 |
| 0.123529  | 1 | 1050 | 29 | 0.0203121 |
| 0.0875878 | 1 | 748  | 21 | 0.0495666 |
| 0.101765  | 1 | 865  | 18 | 0.0288572 |
| 0.0739482 | 1 | 631  | 12 | 0.0206564 |
| 0.11895   | 1 | 1015 | 28 | 0.0165957 |
| 0.0260949 | 1 | 883  | 21 | 0.0337918 |
| 0.0166085 | 1 | 562  | 16 | 0.0467506 |
| 0.0166085 | 1 | 562  | 16 | 0.0330149 |
| 0.0234647 | 1 | 794  | 18 | 0.032909  |
| 0.0166085 | 1 | 562  | 16 | 0.0416748 |
| 0.024706  | 1 | 836  | 19 | 0.0320792 |
| 0.0852941 | 1 | 725  | 21 | 0.0127734 |
| 0.0721176 | 1 | 613  | 16 | 0.0447997 |
| 0.0706847 | 1 | 638  | 13 | 0.0499285 |
| 0.0983625 | 1 | 853  | 20 | 0.0166752 |
| 0.070927  | 1 | 606  | 17 | 0.0437051 |
| 0.0717556 | 1 | 627  | 18 | 0.0461591 |
| 0.138348  | 1 | 1179 | 32 | 0.0100634 |
| 0.0854118 | 1 | 726  | 20 | 0.0467859 |
| 0.120706  | 1 | 1026 | 29 | 0.0464858 |
| 0.0719323 | 1 | 612  | 18 | 0.0463269 |
| 0.0706158 | 1 | 602  | 16 | 0.0495401 |
| 0.07      | 1 | 595  | 14 | 0.0456825 |
| 0.128353  | 1 | 1091 | 31 | 0.0228809 |
| 0.0691569 | 1 | 598  | 17 | 0.0451263 |
| 0.111294  | 1 | 946  | 22 | 0.0166664 |
| 0.0722353 | 1 | 614  | 17 | 0.0497343 |
| 0.184353  | 1 | 1567 | 43 | 0.0235165 |
| 0.0885882 | 1 | 753  | 21 | 0.0478187 |
| 0.0730588 | 1 | 621  | 17 | 0.0495136 |
| 0.0757647 | 1 | 644  | 19 | 0.0435374 |
| 0.118471  | 1 | 1007 | 29 | 0.0221306 |
| 0.0794118 | 1 | 675  | 19 | 0.0455324 |
| 0.221059  | 1 | 1879 | 51 | 0.0152628 |
| 0.122353  | 1 | 1040 | 29 | 0.0214156 |
| 0.148904  | 1 | 1270 | 30 | 0.0363341 |
| 0.0688513 | 1 | 603  | 17 | 0.0416836 |
| 0.0707746 | 1 | 603  | 17 | 0.0416836 |
| 0.0791173 | 1 | 674  | 19 | 0.0413305 |
| 0.144571  | 1 | 1229 | 33 | 0.0124821 |
| 0.103364  | 1 | 888  | 23 | 0.0334563 |

|           |          |      |    |           |
|-----------|----------|------|----|-----------|
| 0.11769   | 1        | 1304 | 35 | 0.0342861 |
| 0.126706  | 1        | 1077 | 28 | 0.0498314 |
| 0.0939394 | 1        | 806  | 18 | 0.0423192 |
| 0.0771655 | 1        | 661  | 19 | 0.0461591 |
| 0.0808471 | 1        | 691  | 19 | 0.0464505 |
| 0.0708235 | 1        | 602  | 17 | 0.0489398 |
| 0.101294  | 1        | 861  | 18 | 0.0471302 |
| 0.0748235 | 1        | 636  | 13 | 0.0457354 |
| 0.059095  | 1        | 858  | 24 | 0.0278597 |
| 0.0504706 | 1        | 429  | 10 | 0.045912  |
| 0.0768235 | 1        | 653  | 15 | 0.0466535 |
| 0.0753698 | 1        | 642  | 13 | 0.0373404 |
| 0.100846  | 1        | 858  | 23 | 0.0330238 |
| 0.0390522 | 1        | 651  | 14 | 0.0401476 |
| 0.0799296 | 1        | 681  | 19 | 0.0473862 |
| 0.0875294 | 1        | 744  | 18 | 0.0338094 |
| 0.0750412 | 1        | 638  | 15 | 0.0345421 |
| 0.0724706 | 1        | 616  | 18 | 0.0441112 |
| 0.0722353 | 1        | 614  | 15 | 0.0474303 |
| 0.0789504 | 1        | 674  | 19 | 0.0238167 |
| 0.0748795 | 1        | 637  | 15 | 0.0233576 |
| 0.0912941 | 1        | 776  | 17 | 0.0163574 |
| 0.0844706 | 1        | 718  | 17 | 0.0371815 |
| 0.0692655 | 1        | 613  | 17 | 0.0454618 |
| 0.119921  | 1        | 1027 | 26 | 0.0325294 |
| 0.128353  | 1        | 1091 | 31 | 0.0243198 |
| 0.100824  | 1        | 857  | 24 | 0.0404213 |
| 0.113294  | 1        | 963  | 27 | 0.0227397 |
| 0.074375  | 1        | 714  | 20 | 0.0438287 |
| 0.0825    | 1        | 792  | 16 | 0.0337653 |
| 0.0623958 | 1        | 599  | 15 | 0.0466182 |
| 0.0959323 | 1        | 816  | 21 | 0.0319115 |
| 0.117124  | 1        | 1002 | 25 | 0.0301901 |
| 0.0809915 | 1        | 709  | 16 | 0.0302255 |
| 0.122828  | 1        | 1046 | 24 | 0.0231105 |
| 0.112     | 1        | 952  | 27 | 0.0314966 |
| 0.0531176 | 1        | 627  | 17 | 0.0388941 |
| 0.108493  | 1        | 930  | 26 | 0.0176462 |
| 0.0395294 | 0.449198 | 748  | 21 | 0.0380466 |
| 0.113294  | 0.975684 | 987  | 25 | 0.0450557 |
| 0.060448  | 1        | 591  | 16 | 0.0432549 |
| 0.102706  | 1        | 873  | 19 | 0.0424074 |
| 0.0708235 | 1        | 602  | 15 | 0.0338801 |
| 0.0761087 | 1        | 647  | 16 | 0.0487809 |
| 0.0741262 | 1        | 632  | 18 | 0.0453735 |
| 0.0743529 | 1        | 632  | 18 | 0.0453735 |
| 0.0183529 | 0.287293 | 543  | 10 | 0.0387264 |

|           |          |      |    |            |
|-----------|----------|------|----|------------|
| 0.0699589 | 1        | 595  | 16 | 0.0437051  |
| 0.093992  | 1        | 801  | 15 | 0.04811    |
| 0.0722835 | 1        | 616  | 17 | 0.0422927  |
| 0.0797935 | 1        | 680  | 13 | 0.0287601  |
| 0.11632   | 1        | 995  | 28 | 0.0152275  |
| 0.0701176 | 1        | 596  | 13 | 0.0484896  |
| 0.0795167 | 1        | 691  | 20 | 0.0414805  |
| 0.104353  | 1        | 887  | 25 | 0.0306845  |
| 0.104255  | 1        | 887  | 25 | 0.0306845  |
| 0.0477647 | 0.601481 | 675  | 19 | 0.0286012  |
| 0.112941  | 1        | 960  | 27 | 0.0204622  |
| 0.0713952 | 1        | 612  | 10 | 0.0462209  |
| 0.0893607 | 1        | 766  | 18 | 0.0326177  |
| 0.0870638 | 1        | 741  | 21 | 0.0290867  |
| 0.0802433 | 1        | 686  | 19 | 0.0166664  |
| 0.0773393 | 1        | 686  | 19 | 0.0166664  |
| 0.198971  | 1        | 1701 | 43 | 0.0135326  |
| 0.0780158 | 0.40682  | 1701 | 43 | 0.0135326  |
| 0.176278  | 1        | 1507 | 52 | 0.00818312 |
| 0.0656471 | 1        | 558  | 16 | 0.0122438  |
| 0.108706  | 1        | 924  | 27 | 0.0338712  |
| 0.0882353 | 1        | 750  | 21 | 0.0470596  |
| 0.110706  | 1        | 941  | 20 | 0.0320881  |
| 0.125059  | 1        | 1063 | 29 | 0.0152451  |
| 0.086298  | 0.883455 | 961  | 26 | 0.0234459  |
| 0.082     | 1        | 697  | 17 | 0.0465652  |
| 0.103059  | 1        | 876  | 22 | 0.0409068  |
| 0.0764713 | 1        | 651  | 18 | 0.042019   |

Fraction of negatively enriched windows in region

MAT-score on T(H3K9me3HETHF vs. control)

|   |         |
|---|---------|
| 0 | 8.22951 |
| 0 | 7.04134 |
| 0 | 5.86245 |
| 0 | 6.09498 |
| 0 | 5.51658 |
| 0 | 7.30265 |
| 0 | 5.25161 |
| 0 | 5.25161 |
| 0 | 6.45931 |
| 0 | 6.45931 |
| 0 | 7.03498 |
| 0 | 5.16953 |
| 0 | 8.36392 |
| 0 | 6.58794 |
| 0 | 5.83602 |
| 0 | 6.20873 |
| 0 | 5.25317 |
| 0 | 7.23973 |
| 0 | 8.19113 |
| 0 | 5.60657 |
| 0 | 13.0838 |
| 0 | 6.11    |
| 0 | 5.16322 |
| 0 | 5.35694 |
| 0 | 6.39327 |
| 0 | 5.16554 |
| 0 | 5.71316 |
| 0 | 5.18727 |
| 0 | 5.22263 |
| 0 | 6.28402 |
| 0 | 6.28402 |
| 0 | 6.13229 |
| 0 | 5.75338 |
| 0 | 7.08901 |
| 0 | 6.08386 |
| 0 | 5.2288  |
| 0 | 5.35666 |
| 0 | 6.53296 |
| 0 | 5.3349  |
| 0 | 7.17061 |
| 0 | 6.03542 |
| 0 | 6.18972 |
| 0 | 8.36609 |
| 0 | 7.2787  |

|   |         |
|---|---------|
| 0 | 5.21825 |
| 0 | 6.10434 |
| 0 | 6.25494 |
| 0 | 9.03412 |
| 0 | 6.18109 |
| 0 | 7.50405 |
| 0 | 5.37019 |
| 0 | 6.59732 |
| 0 | 5.26425 |
| 0 | 5.26425 |
| 0 | 5.46353 |
| 0 | 5.5792  |
| 0 | 5.20963 |
| 0 | 7.33293 |
| 0 | 5.42508 |
| 0 | 6.2708  |
| 0 | 6.1967  |
| 0 | 6.21222 |
| 0 | 5.35643 |
| 0 | 7.37095 |
| 0 | 6.24954 |
| 0 | 5.5905  |
| 0 | 5.16815 |
| 0 | 5.45122 |
| 0 | 7.06303 |
| 0 | 6.11596 |
| 0 | 6.10196 |
| 0 | 6.2768  |
| 0 | 6.15818 |
| 0 | 6.26955 |
| 0 | 6.41665 |
| 0 | 6.34668 |
| 0 | 6.81874 |
| 0 | 5.32785 |
| 0 | 5.19397 |
| 0 | 5.29351 |
| 0 | 5.35426 |
| 0 | 7.01232 |
| 0 | 10.116  |
| 0 | 5.42006 |
| 0 | 5.16024 |
| 0 | 5.16024 |
| 0 | 6.08979 |
| 0 | 6.08979 |
| 0 | 5.18078 |
| 0 | 5.58477 |
| 0 | 6.24878 |

|   |         |
|---|---------|
| 0 | 5.34717 |
| 0 | 7.02654 |
| 0 | 5.47086 |
| 0 | 5.70781 |
| 0 | 6.12251 |
| 0 | 5.25578 |
| 0 | 5.26123 |
| 0 | 6.03631 |
| 0 | 5.4444  |
| 0 | 6.53398 |
| 0 | 9.45275 |
| 0 | 9.45275 |
| 0 | 5.2423  |
| 0 | 5.23873 |
| 0 | 5.6621  |
| 0 | 5.6621  |
| 0 | 5.85799 |
| 0 | 7.22457 |
| 0 | 5.61853 |
| 0 | 6.4321  |
| 0 | 15.4421 |
| 0 | 5.48343 |
| 0 | 6.66731 |
| 0 | 8.41994 |
| 0 | 6.34305 |
| 0 | 6.03854 |
| 0 | 6.03854 |
| 0 | 9.42376 |
| 0 | 8.65508 |
| 0 | 11.0507 |
| 0 | 7.46263 |
| 0 | 6.28476 |
| 0 | 5.41265 |
| 0 | 9.18638 |
| 0 | 8.18304 |
| 0 | 5.46083 |
| 0 | 7.02241 |
| 0 | 8.04692 |
| 0 | 10.9091 |
| 0 | 5.34589 |
| 0 | 5.34104 |
| 0 | 6.14307 |
| 0 | 7.22657 |
| 0 | 7.22049 |
| 0 | 10.1277 |
| 0 | 7.17461 |
| 0 | 5.27193 |

|   |         |
|---|---------|
| 0 | 5.42036 |
| 0 | 7.20785 |
| 0 | 9.11824 |
| 0 | 12.2662 |
| 0 | 5.23962 |
| 0 | 9.1755  |
| 0 | 5.50136 |
| 0 | 5.37132 |
| 0 | 6.01124 |
| 0 | 5.26702 |
| 0 | 5.26702 |
| 0 | 5.18524 |
| 0 | 7.0871  |
| 0 | 6.24731 |
| 0 | 5.2376  |
| 0 | 5.18933 |
| 0 | 5.48426 |
| 0 | 5.55843 |
| 0 | 5.23796 |
| 0 | 5.60482 |
| 0 | 5.22467 |
| 0 | 6.26255 |
| 0 | 5.3543  |
| 0 | 6.21075 |
| 0 | 5.27049 |
| 0 | 5.30897 |
| 0 | 7.59771 |
| 0 | 6.88197 |
| 0 | 5.46562 |
| 0 | 5.47366 |
| 0 | 5.3853  |
| 0 | 6.12949 |
| 0 | 6.45172 |
| 0 | 6.15479 |
| 0 | 5.78557 |
| 0 | 5.78557 |
| 0 | 6.04756 |
| 0 | 8.00054 |
| 0 | 5.21313 |
| 0 | 5.89036 |
| 0 | 7.30152 |
| 0 | 7.01042 |
| 0 | 5.2082  |
| 0 | 7.68326 |
| 0 | 6.53538 |
| 0 | 10.1655 |
| 0 | 5.29047 |

|   |         |
|---|---------|
| 0 | 7.46154 |
| 0 | 6.90971 |
| 0 | 7.6354  |
| 0 | 5.20617 |
| 0 | 5.29582 |
| 0 | 5.18669 |
| 0 | 7.17379 |
| 0 | 5.33564 |
| 0 | 5.53369 |
| 0 | 6.0851  |
| 0 | 6.329   |
| 0 | 5.16588 |
| 0 | 5.26866 |
| 0 | 6.54432 |
| 0 | 5.24435 |
| 0 | 5.39437 |
| 0 | 5.19693 |
| 0 | 5.34671 |
| 0 | 7.04481 |
| 0 | 5.20109 |
| 0 | 5.6228  |
| 0 | 5.1661  |
| 0 | 6.10961 |
| 0 | 5.96217 |
| 0 | 5.24064 |
| 0 | 10.8139 |
| 0 | 5.75587 |
| 0 | 18.3336 |
| 0 | 5.66278 |
| 0 | 6.74595 |
| 0 | 5.50073 |
| 0 | 11.179  |
| 0 | 5.47372 |
| 0 | 5.26007 |
| 0 | 5.16864 |
| 0 | 5.54392 |
| 0 | 6.13839 |
| 0 | 6.63491 |
| 0 | 5.39401 |
| 0 | 7.80658 |
| 0 | 6.00947 |
| 0 | 6.06195 |
| 0 | 6.0397  |
| 0 | 5.38127 |
| 0 | 5.26063 |
| 0 | 5.3111  |
| 0 | 6.31017 |



|   |         |
|---|---------|
| 0 | 10.7478 |
| 0 | 6.66845 |
| 0 | 5.31908 |
| 0 | 5.23519 |
| 0 | 5.19425 |
| 0 | 7.03118 |
| 0 | 5.32893 |
| 0 | 5.16052 |
| 0 | 16.1838 |
| 0 | 7.06081 |
| 0 | 5.34055 |
| 0 | 12.9025 |
| 0 | 8.04537 |
| 0 | 5.4304  |
| 0 | 5.32938 |
| 0 | 5.29504 |
| 0 | 5.63685 |
| 0 | 5.64543 |
| 0 | 6.22434 |
| 0 | 5.76938 |
| 0 | 6.47248 |
| 0 | 7.1058  |
| 0 | 5.3824  |
| 0 | 5.34887 |
| 0 | 5.25858 |
| 0 | 7.89133 |
| 0 | 5.64543 |
| 0 | 5.17427 |
| 0 | 9.44499 |
| 0 | 17.7104 |
| 0 | 8.4177  |
| 0 | 5.21748 |
| 0 | 9.01972 |
| 0 | 5.3227  |
| 0 | 6.21571 |
| 0 | 6.06776 |
| 0 | 5.46212 |
| 0 | 5.82522 |
| 0 | 5.49434 |
| 0 | 6.9765  |
| 0 | 11.7053 |
| 0 | 5.22276 |
| 0 | 5.22276 |
| 0 | 7.15382 |
| 0 | 5.42362 |
| 0 | 8.04594 |
| 0 | 5.65165 |

|     |         |
|-----|---------|
| 0   | 6.23586 |
| 0   | 5.50808 |
| 0   | 6.44419 |
| 0.6 | 6.18121 |
| 0   | 5.22937 |
| 0   | 5.71395 |
| 0   | 5.41496 |
| 0   | 8.17763 |
| 0   | 7.45082 |
| 0   | 8.13623 |
| 0   | 7.06994 |
| 0   | 5.19955 |
| 0   | 5.59855 |
| 0   | 5.94133 |
| 0   | 7.3274  |
| 0   | 5.70883 |
| 0   | 5.5848  |
| 0   | 6.1013  |
| 0   | 8.33746 |
| 0   | 6.15789 |
| 0   | 5.35832 |
| 0   | 5.17779 |
| 0   | 8.12969 |
| 0   | 6.01713 |
| 0   | 5.19952 |
| 0   | 9.43232 |
| 0   | 6.05766 |
| 0   | 5.16528 |
| 0   | 5.39837 |
| 0   | 6.20655 |
| 0   | 8.07372 |
| 0   | 5.42492 |
| 0   | 5.60342 |
| 0   | 6.03505 |
| 0   | 5.23289 |
| 0   | 5.20316 |
| 0   | 7.04027 |
| 0   | 6.07297 |
| 0   | 6.44729 |
| 0   | 6.44729 |
| 0   | 5.18148 |
| 0   | 6.43817 |
| 0   | 6.12887 |
| 0   | 6.1922  |
| 0   | 5.57814 |
| 0   | 6.41536 |
| 0   | 5.31291 |

|   |         |
|---|---------|
| 0 | 5.2533  |
| 0 | 6.03855 |
| 0 | 5.16943 |
| 0 | 5.44795 |
| 0 | 5.42705 |
| 0 | 5.36318 |
| 0 | 5.26012 |
| 0 | 5.80944 |
| 0 | 5.21626 |
| 0 | 5.40374 |
| 0 | 5.93222 |
| 0 | 5.33721 |
| 0 | 5.25889 |
| 0 | 7.45895 |
| 0 | 5.45039 |
| 0 | 8.05395 |
| 0 | 5.59882 |
| 0 | 5.67954 |
| 0 | 6.11734 |
| 0 | 5.38867 |
| 0 | 5.35809 |
| 0 | 5.72132 |
| 0 | 7.06223 |
| 0 | 6.09859 |
| 0 | 6.23771 |
| 0 | 8.81679 |
| 0 | 9.22192 |
| 0 | 6.48577 |
| 0 | 5.22963 |
| 0 | 8.00196 |
| 0 | 6.13955 |
| 0 | 5.44268 |
| 0 | 8.4337  |
| 0 | 6.06761 |
| 0 | 5.22321 |
| 0 | 5.33061 |
| 0 | 5.26266 |
| 0 | 5.1742  |
| 0 | 6.17434 |
| 0 | 6.26733 |
| 0 | 6.26733 |
| 0 | 5.20579 |
| 0 | 5.43301 |
| 0 | 6.6351  |
| 0 | 5.42149 |
| 0 | 5.20129 |
| 0 | 5.20129 |

|   |         |
|---|---------|
| 0 | 13.3119 |
| 0 | 6.04959 |
| 0 | 5.6017  |
| 0 | 5.55629 |
| 0 | 6.03204 |
| 0 | 5.1706  |
| 0 | 6.30434 |
| 0 | 5.5176  |
| 0 | 5.20094 |
| 0 | 5.27951 |
| 0 | 5.20766 |
| 0 | 5.20766 |
| 0 | 5.56033 |
| 0 | 5.40766 |
| 0 | 5.17194 |
| 0 | 6.73649 |
| 0 | 5.33384 |
| 0 | 6.3695  |
| 0 | 5.36853 |
| 0 | 5.21158 |
| 0 | 5.54488 |
| 0 | 5.95796 |
| 0 | 6.06953 |
| 0 | 7.10514 |
| 0 | 6.39812 |
| 0 | 7.28152 |
| 0 | 6.2449  |
| 0 | 5.36902 |
| 0 | 5.52118 |
| 0 | 6.27964 |
| 0 | 7.1925  |
| 0 | 7.34817 |
| 0 | 5.6633  |
| 0 | 8.5218  |
| 0 | 7.04407 |
| 0 | 5.29376 |
| 0 | 6.25238 |
| 0 | 5.37234 |
| 0 | 5.19001 |
| 0 | 8.05138 |
| 0 | 6.08832 |
| 0 | 5.4145  |
| 0 | 6.04768 |
| 0 | 6.16626 |
| 0 | 6.44686 |
| 0 | 5.30574 |
| 0 | 5.22829 |

|          |         |
|----------|---------|
| 0        | 6.52175 |
| 0        | 6.30668 |
| 0        | 5.32482 |
| 0        | 8.27124 |
| 0        | 5.23344 |
| 0        | 6.87213 |
| 0        | 7.33329 |
| 0        | 5.17858 |
| 0        | 9.47228 |
| 0        | 5.20836 |
| 0        | 6.18305 |
| 0        | 6.28157 |
| 0        | 6.44607 |
| 0        | 5.2426  |
| 0        | 5.56564 |
| 0        | 5.8848  |
| 0        | 5.43395 |
| 0        | 6.25007 |
| 0        | 6.18938 |
| 0        | 5.3687  |
| 0        | 6.15439 |
| 0        | 5.32291 |
| 0        | 5.31292 |
| 0        | 6.01684 |
| 0        | 5.34048 |
| 0        | 6.14293 |
| 0        | 5.31693 |
| 0        | 7.05034 |
| 0        | 5.25469 |
| 0        | 7.13453 |
| 0        | 5.85423 |
| 0        | 5.4268  |
| 0        | 5.39834 |
| 0.666667 | 5.3172  |
| 0        | 6.00449 |
| 0        | 7.51629 |
| 0        | 5.52432 |
| 0        | 5.3141  |
| 0        | 6.33793 |
| 0        | 5.73523 |
| 0        | 5.6105  |
| 0        | 5.23555 |
| 0        | 5.86544 |
| 0        | 6.31687 |
| 0        | 5.37269 |
| 0        | 8.24236 |
| 0        | 7.00705 |

|   |         |
|---|---------|
| 0 | 7.08407 |
| 0 | 5.8384  |
| 0 | 5.23866 |
| 0 | 6.21344 |
| 0 | 6.0279  |
| 0 | 5.27288 |
| 0 | 7.05281 |
| 0 | 7.33891 |
| 0 | 5.21879 |
| 0 | 6.31066 |
| 0 | 6.10114 |
| 0 | 6.16077 |
| 0 | 5.75837 |
| 0 | 6.39149 |
| 0 | 5.50941 |
| 0 | 5.27452 |
| 0 | 5.74714 |
| 0 | 5.19925 |
| 0 | 5.53372 |
| 0 | 5.20173 |
| 0 | 5.37508 |
| 0 | 5.44509 |
| 0 | 6.00409 |
| 0 | 6.48256 |
| 0 | 6.12829 |
| 0 | 5.17303 |
| 0 | 5.22481 |
| 0 | 6.88408 |
| 0 | 7.02845 |
| 0 | 5.40173 |
| 0 | 5.23355 |
| 0 | 5.93695 |
| 0 | 6.37342 |
| 0 | 10.5298 |
| 0 | 6.11828 |
| 0 | 5.3565  |
| 0 | 5.51103 |
| 0 | 9.09701 |
| 0 | 5.43773 |
| 0 | 8.07446 |
| 0 | 6.18417 |
| 0 | 5.34068 |
| 0 | 6.52201 |
| 0 | 6.05814 |
| 0 | 5.61677 |
| 0 | 6.0377  |
| 0 | 5.29869 |

|   |         |
|---|---------|
| 0 | 5.67981 |
| 0 | 5.18733 |
| 0 | 5.40611 |
| 0 | 6.28741 |
| 0 | 6.43886 |
| 0 | 5.24198 |
| 0 | 5.31218 |
| 0 | 6.31759 |
| 0 | 5.33194 |
| 0 | 6.50394 |
| 0 | 5.25862 |
| 0 | 5.26902 |
| 0 | 5.91514 |
| 0 | 5.15777 |
| 0 | 5.74293 |
| 0 | 5.29896 |
| 0 | 5.19933 |
| 0 | 6.01344 |
| 0 | 10.6533 |
| 0 | 5.37263 |
| 0 | 6.08967 |
| 0 | 6.08756 |
| 0 | 5.36132 |
| 0 | 6.63168 |
| 0 | 5.22706 |
| 0 | 5.16957 |
| 0 | 8.96626 |
| 0 | 5.96667 |
| 0 | 5.21226 |
| 0 | 7.06055 |
| 0 | 5.48755 |
| 0 | 5.17805 |
| 0 | 5.24712 |
| 0 | 5.20903 |
| 0 | 5.35903 |
| 0 | 5.30828 |
| 0 | 8.0322  |
| 0 | 6.96529 |
| 0 | 6.09496 |
| 0 | 5.70245 |
| 0 | 5.24197 |
| 0 | 11.0481 |
| 0 | 6.12117 |
| 0 | 5.34004 |
| 0 | 7.24481 |
| 0 | 5.79359 |
| 0 | 5.38469 |

|   |         |
|---|---------|
| 0 | 5.38469 |
| 0 | 5.26482 |
| 0 | 6.11487 |
| 0 | 6.57616 |
| 0 | 7.01765 |
| 0 | 5.75735 |
| 0 | 6.02241 |
| 0 | 5.70933 |
| 0 | 5.32646 |
| 0 | 5.42688 |
| 0 | 7.55692 |
| 0 | 6.01057 |
| 0 | 6.14152 |
| 0 | 5.24667 |
| 0 | 5.78097 |
| 0 | 5.24179 |
| 0 | 5.7703  |
| 0 | 13.1674 |
| 0 | 6.00465 |
| 0 | 6.54185 |
| 0 | 5.63931 |
| 0 | 5.17868 |
| 0 | 6.19761 |
| 0 | 6.507   |
| 0 | 5.38283 |
| 0 | 5.45162 |
| 0 | 5.94671 |
| 0 | 9.68591 |
| 0 | 5.77921 |
| 0 | 5.56412 |
| 0 | 5.78358 |
| 0 | 5.78358 |
| 0 | 7.05724 |
| 0 | 5.85768 |
| 0 | 6.74277 |
| 0 | 7.25459 |
| 0 | 5.1752  |
| 0 | 5.28792 |
| 0 | 6.05767 |
| 0 | 5.29384 |
| 0 | 7.09151 |
| 0 | 6.17716 |
| 0 | 5.57064 |
| 0 | 6.20006 |
| 0 | 5.19933 |
| 0 | 5.55976 |
| 0 | 7.40306 |



|   |         |
|---|---------|
| 0 | 5.19364 |
| 0 | 7.19198 |
| 0 | 6.30058 |
| 0 | 5.7995  |
| 0 | 6.07329 |
| 0 | 7.52403 |
| 0 | 5.1942  |
| 0 | 8.06729 |
| 0 | 8.01629 |
| 0 | 5.18809 |
| 0 | 8.33115 |
| 0 | 6.97181 |
| 0 | 7.07433 |
| 0 | 7.09003 |
| 0 | 5.64595 |
| 0 | 6.37989 |
| 0 | 5.31499 |
| 0 | 8.20615 |
| 0 | 5.28524 |
| 0 | 6.1665  |
| 0 | 5.33497 |
| 0 | 6.85609 |
| 0 | 5.22602 |
| 0 | 7.14125 |
| 0 | 7.02282 |
| 0 | 6.0513  |
| 0 | 5.48715 |
| 0 | 5.22799 |
| 0 | 6.40127 |
| 0 | 5.85354 |
| 0 | 5.67053 |
| 0 | 5.22403 |
| 0 | 5.44909 |
| 0 | 5.46194 |
| 0 | 5.92342 |
| 0 | 5.41697 |
| 0 | 5.28669 |
| 0 | 6.31366 |
| 0 | 5.32002 |
| 0 | 7.09094 |
| 0 | 5.21173 |
| 0 | 5.16823 |
| 0 | 5.48963 |
| 0 | 6.75348 |
| 0 | 6.14155 |
| 0 | 5.49665 |
| 0 | 6.16141 |

|   |         |
|---|---------|
| 0 | 5.51987 |
| 0 | 5.3969  |
| 0 | 6.09462 |
| 0 | 5.4522  |
| 0 | 5.48202 |
| 0 | 5.93162 |
| 0 | 6.51109 |
| 0 | 6.13912 |
| 0 | 6.13912 |
| 0 | 5.92411 |
| 0 | 5.27905 |
| 0 | 5.20473 |
| 0 | 6.05254 |
| 0 | 5.34115 |
| 0 | 5.4323  |
| 0 | 6.53927 |
| 0 | 5.19165 |
| 0 | 5.15824 |
| 0 | 6.02409 |
| 0 | 6.51465 |
| 0 | 6.4173  |
| 0 | 6.79452 |
| 0 | 5.28636 |
| 0 | 5.78453 |
| 0 | 5.18671 |
| 0 | 5.50225 |
| 0 | 5.48212 |
| 0 | 7.01499 |
| 0 | 5.77355 |
| 0 | 5.65811 |
| 0 | 5.28162 |
| 0 | 5.31311 |
| 0 | 6.67872 |
| 0 | 5.25349 |
| 0 | 5.16991 |
| 0 | 5.73092 |
| 0 | 8.13542 |
| 0 | 7.06273 |
| 0 | 5.23022 |
| 0 | 5.20395 |
| 0 | 5.20395 |
| 0 | 5.23331 |
| 0 | 6.22284 |
| 0 | 7.18111 |
| 0 | 5.57827 |
| 0 | 5.36131 |
| 0 | 5.17954 |

|   |         |
|---|---------|
| 0 | 11.2305 |
| 0 | 7.80284 |
| 0 | 5.68718 |
| 0 | 5.25426 |
| 0 | 9.16866 |
| 0 | 19.3661 |
| 0 | 6.59968 |
| 0 | 5.82546 |
| 0 | 6.24157 |
| 0 | 5.41771 |
| 0 | 5.56861 |
| 0 | 6.5801  |
| 0 | 6.12508 |
| 0 | 6.12508 |
| 0 | 6.0357  |
| 0 | 5.67212 |
| 0 | 8.28506 |
| 0 | 5.35538 |
| 0 | 5.19168 |
| 0 | 5.28605 |
| 0 | 8.48314 |
| 0 | 5.38464 |
| 0 | 8.60366 |
| 0 | 6.33694 |
| 0 | 7.10705 |
| 0 | 9.02559 |
| 0 | 5.22881 |
| 0 | 5.22881 |
| 0 | 7.39021 |
| 0 | 5.33192 |
| 0 | 7.18188 |
| 0 | 6.24375 |
| 0 | 8.3405  |
| 0 | 8.18363 |
| 0 | 8.18363 |
| 0 | 6.16754 |
| 0 | 8.1786  |
| 0 | 7.10727 |
| 0 | 7.23465 |
| 0 | 10.1341 |
| 0 | 15.2795 |
| 0 | 6.36202 |
| 0 | 9.54237 |
| 0 | 5.18546 |
| 0 | 8.34011 |
| 0 | 5.46411 |
| 0 | 5.18701 |

|   |         |
|---|---------|
| 0 | 8.75723 |
| 0 | 6.02425 |
| 0 | 5.5994  |
| 0 | 5.7524  |
| 0 | 6.28637 |
| 0 | 6.46404 |
| 0 | 5.46503 |
| 0 | 5.53287 |
| 0 | 5.39036 |
| 0 | 6.17499 |
| 0 | 6.32786 |
| 0 | 6.16824 |
| 0 | 6.05204 |
| 0 | 6.23317 |
| 0 | 8.11882 |
| 0 | 5.26089 |
| 0 | 6.11024 |
| 0 | 5.38151 |
| 0 | 5.70513 |
| 0 | 6.88404 |
| 0 | 5.3983  |
| 0 | 5.36909 |
| 0 | 5.17695 |
| 0 | 5.48905 |
| 0 | 5.16333 |
| 0 | 5.19689 |
| 0 | 5.39085 |
| 0 | 5.63494 |
| 0 | 6.88938 |
| 0 | 5.72085 |
| 0 | 8.4549  |
| 0 | 6.2575  |
| 0 | 6.2575  |
| 0 | 6.307   |
| 0 | 6.10772 |
| 0 | 6.02529 |
| 0 | 11.5506 |
| 0 | 7.14965 |
| 0 | 5.78047 |
| 0 | 6.49784 |
| 0 | 8.40998 |
| 0 | 8.77919 |
| 0 | 5.21246 |
| 0 | 8.23358 |
| 0 | 5.39771 |
| 0 | 11.4872 |
| 0 | 5.31144 |

|     |         |
|-----|---------|
| 0   | 5.49531 |
| 0   | 5.42257 |
| 0   | 5.2786  |
| 0   | 5.25907 |
| 0   | 5.24009 |
| 0   | 6.11395 |
| 0   | 5.21776 |
| 0   | 7.07125 |
| 0   | 6.00782 |
| 0   | 5.61298 |
| 0   | 5.5238  |
| 0   | 6.09548 |
| 0   | 6.28769 |
| 0   | 5.48911 |
| 0   | 5.73433 |
| 0   | 7.27781 |
| 0   | 5.65642 |
| 0   | 5.26908 |
| 0   | 5.25033 |
| 0   | 5.20787 |
| 0   | 5.73785 |
| 0   | 6.03987 |
| 0   | 5.43107 |
| 0   | 5.2642  |
| 0.5 | 6.01787 |
| 0   | 5.64628 |
| 0   | 6.24792 |
| 0   | 5.41578 |
| 0   | 6.15331 |
| 0   | 5.41595 |
| 0   | 7.04076 |
| 0   | 6.17345 |
| 0   | 5.89127 |
| 0   | 6.69746 |
| 0   | 6.07159 |
| 0   | 6.56426 |
| 0   | 6.47976 |
| 0   | 5.34454 |
| 0   | 5.38636 |
| 0   | 5.48899 |
| 0   | 7.02883 |
| 0   | 5.80933 |
| 0   | 5.64587 |
| 0   | 9.30641 |
| 0   | 6.02451 |
| 0   | 5.19791 |
| 0   | 5.27985 |

|   |         |
|---|---------|
| 0 | 5.64211 |
| 0 | 5.2411  |
| 0 | 5.28918 |
| 0 | 5.35488 |
| 0 | 5.9306  |
| 0 | 6.62406 |
| 0 | 6.26389 |
| 0 | 5.24723 |
| 0 | 6.89662 |
| 0 | 5.16084 |
| 0 | 5.28495 |
| 0 | 5.49666 |
| 0 | 5.41753 |
| 0 | 5.41753 |
| 0 | 5.44997 |
| 0 | 7.66548 |
| 0 | 6.12616 |
| 0 | 5.42847 |
| 0 | 6.27044 |
| 0 | 5.25902 |
| 0 | 8.04736 |
| 0 | 5.55656 |
| 0 | 6.15473 |
| 0 | 8.16551 |
| 0 | 5.47464 |
| 0 | 6.23957 |
| 0 | 5.16595 |
| 0 | 7.40995 |
| 0 | 6.06118 |
| 0 | 7.76989 |
| 0 | 5.23083 |
| 0 | 6.20772 |
| 0 | 7.01395 |
| 0 | 5.5348  |
| 0 | 6.2018  |
| 0 | 5.25294 |
| 0 | 5.166   |
| 0 | 5.27453 |
| 0 | 5.31475 |
| 0 | 5.41863 |
| 0 | 5.18177 |
| 0 | 6.32299 |
| 0 | 5.3749  |
| 0 | 5.1747  |
| 0 | 5.35104 |
| 0 | 5.28418 |
| 0 | 5.20753 |

|   |         |
|---|---------|
| 0 | 5.27937 |
| 0 | 7.12368 |
| 0 | 5.39059 |
| 0 | 5.44319 |
| 0 | 5.6903  |
| 0 | 7.27425 |
| 0 | 5.33847 |
| 0 | 5.33714 |
| 0 | 5.41274 |
| 0 | 7.75692 |
| 0 | 5.16304 |
| 0 | 6.02712 |
| 0 | 5.23621 |
| 0 | 5.20483 |
| 0 | 5.2347  |
| 0 | 5.77097 |
| 0 | 9.89382 |
| 0 | 5.22737 |
| 0 | 5.3512  |
| 0 | 7.11831 |
| 0 | 6.11099 |
| 0 | 5.29163 |
| 0 | 8.08718 |
| 0 | 6.12817 |
| 0 | 6.99053 |
| 0 | 6.57243 |
| 0 | 9.06341 |
| 0 | 6.34404 |
| 0 | 8.24306 |
| 0 | 6.52816 |
| 0 | 5.26297 |
| 0 | 6.10936 |
| 0 | 5.42109 |
| 0 | 5.56813 |
| 0 | 5.68001 |
| 0 | 5.88553 |
| 0 | 5.75788 |
| 0 | 5.68782 |
| 0 | 5.38443 |
| 0 | 5.40642 |
| 0 | 5.61049 |
| 0 | 6.17461 |
| 0 | 5.70101 |
| 0 | 5.23536 |
| 0 | 6.15219 |
| 0 | 5.6973  |
| 0 | 5.21419 |

|   |         |
|---|---------|
| 0 | 5.20487 |
| 0 | 5.20487 |
| 0 | 6.77833 |
| 0 | 5.28836 |
| 0 | 5.47048 |
| 0 | 6.23974 |
| 0 | 5.42899 |
| 0 | 5.15868 |
| 0 | 6.44066 |
| 0 | 6.00975 |
| 0 | 5.35842 |
| 0 | 6.19379 |
| 0 | 6.39462 |
| 0 | 6.87593 |
| 0 | 5.29752 |
| 0 | 6.08142 |
| 0 | 6.50847 |
| 0 | 5.26935 |
| 0 | 6.09943 |
| 0 | 5.71796 |
| 0 | 5.26518 |
| 0 | 13.3485 |
| 0 | 7.228   |
| 0 | 6.51549 |
| 0 | 6.51549 |
| 0 | 5.2781  |
| 0 | 6.30724 |
| 0 | 6.71381 |
| 0 | 5.56951 |
| 0 | 6.01769 |
| 0 | 5.48475 |
| 0 | 6.03108 |
| 0 | 5.66183 |
| 0 | 5.30264 |
| 0 | 5.35226 |
| 0 | 6.00417 |
| 0 | 6.00417 |
| 0 | 8.41276 |
| 0 | 6.16305 |
| 0 | 6.02205 |
| 0 | 5.23292 |
| 0 | 5.79907 |
| 0 | 7.14236 |
| 0 | 5.32617 |
| 0 | 7.11742 |
| 0 | 6.01781 |
| 0 | 5.50576 |



|   |         |
|---|---------|
| 0 | 5.50576 |
| 0 | 5.69008 |
| 0 | 5.48421 |
| 0 | 5.29344 |
| 0 | 5.50825 |
| 0 | 6.18264 |
| 0 | 5.46361 |
| 0 | 6.43794 |
| 0 | 5.34619 |
| 0 | 5.19947 |
| 0 | 5.4558  |
| 0 | 5.25713 |
| 0 | 6.16166 |
| 0 | 6.19177 |
| 0 | 6.2     |
| 0 | 5.22269 |
| 0 | 5.17056 |
| 0 | 8.18281 |
| 0 | 5.36652 |
| 0 | 6.35542 |
| 0 | 5.62592 |
| 0 | 7.00155 |
| 0 | 6.41198 |
| 0 | 5.65764 |
| 0 | 5.65764 |
| 0 | 5.41289 |
| 0 | 6.25013 |
| 0 | 5.31065 |
| 0 | 5.59981 |
| 0 | 8.28258 |
| 0 | 6.38151 |
| 0 | 6.56402 |
| 0 | 8.23378 |
| 0 | 9.72167 |
| 0 | 6.20913 |
| 0 | 5.71174 |
| 0 | 6.31185 |
| 0 | 6.31185 |
| 0 | 5.21814 |
| 0 | 5.46585 |
| 0 | 5.20644 |
| 0 | 5.19518 |
| 0 | 6.14793 |
| 0 | 5.73972 |
| 0 | 5.50431 |
| 0 | 7.73651 |
| 0 | 6.3773  |

|   |         |
|---|---------|
| 0 | 7.26476 |
| 0 | 21.0989 |
| 0 | 6.52477 |
| 0 | 5.36241 |
| 0 | 6.80328 |
| 0 | 5.627   |
| 0 | 6.15236 |
| 0 | 7.21122 |
| 0 | 6.1662  |
| 0 | 5.45052 |
| 0 | 5.81521 |
| 0 | 5.27205 |
| 0 | 5.40619 |
| 0 | 8.36476 |
| 0 | 5.81342 |
| 0 | 5.19916 |
| 0 | 8.27266 |
| 0 | 5.44892 |
| 0 | 5.17611 |
| 0 | 6.02609 |
| 0 | 6.42008 |
| 0 | 6.2956  |
| 0 | 7.1792  |
| 0 | 5.77415 |
| 0 | 5.22554 |
| 0 | 5.22554 |
| 0 | 7.10742 |
| 0 | 5.4172  |
| 0 | 7.25352 |
| 0 | 6.03724 |
| 0 | 5.56627 |
| 0 | 5.85188 |
| 0 | 6.10787 |
| 0 | 6.13161 |
| 0 | 5.31341 |
| 0 | 9.81234 |
| 0 | 5.55176 |
| 0 | 5.40148 |
| 0 | 6.53477 |
| 0 | 5.16054 |
| 0 | 5.28452 |
| 0 | 5.28529 |
| 0 | 6.553   |
| 0 | 8.31012 |
| 0 | 6.27775 |
| 0 | 7.22547 |
| 0 | 5.23459 |

|   |         |
|---|---------|
| 0 | 5.1642  |
| 0 | 5.26616 |
| 0 | 5.1944  |
| 0 | 6.13775 |
| 0 | 5.23627 |
| 0 | 5.41155 |
| 0 | 5.44995 |
| 0 | 5.44995 |
| 0 | 7.51712 |
| 0 | 5.1617  |
| 0 | 7.20987 |
| 0 | 6.30035 |
| 0 | 8.94415 |
| 0 | 6.26337 |
| 0 | 5.80176 |
| 0 | 6.23024 |
| 0 | 5.54928 |
| 0 | 7.41379 |
| 0 | 6.04    |
| 0 | 5.59824 |
| 0 | 7.21467 |
| 0 | 7.40969 |
| 0 | 7.40969 |
| 0 | 5.22512 |
| 0 | 5.34045 |
| 0 | 7.33218 |
| 0 | 7.33218 |
| 0 | 5.18975 |
| 0 | 5.18975 |
| 0 | 5.83206 |
| 0 | 5.35994 |
| 0 | 5.34239 |
| 0 | 6.0097  |
| 0 | 5.19352 |
| 0 | 6.14513 |
| 0 | 5.35603 |
| 0 | 5.26932 |
| 0 | 6.18082 |
| 0 | 5.19449 |
| 0 | 5.43626 |
| 0 | 5.22159 |
| 0 | 5.16739 |
| 0 | 5.31595 |
| 0 | 7.5009  |
| 0 | 5.5542  |
| 0 | 5.4359  |
| 0 | 5.28046 |

|   |         |
|---|---------|
| 0 | 5.5558  |
| 0 | 7.27942 |
| 0 | 5.62705 |
| 0 | 5.23188 |
| 0 | 5.23734 |
| 0 | 5.33702 |
| 0 | 5.2612  |
| 0 | 6.45675 |
| 0 | 5.24813 |
| 0 | 6.92802 |
| 0 | 5.21062 |
| 0 | 6.44167 |
| 0 | 6.20539 |
| 0 | 6.4085  |
| 0 | 6.17782 |
| 0 | 6.03787 |
| 0 | 5.53682 |
| 0 | 5.75851 |
| 0 | 5.43554 |
| 0 | 7.74344 |
| 0 | 5.31912 |
| 0 | 5.30442 |
| 0 | 5.16769 |
| 0 | 5.5944  |
| 0 | 5.28201 |
| 0 | 6.09497 |
| 0 | 6.2128  |
| 0 | 6.15598 |
| 0 | 6.15952 |
| 0 | 6.00476 |
| 0 | 6.16159 |
| 0 | 5.50953 |
| 0 | 11.231  |
| 0 | 7.63141 |
| 0 | 5.55921 |
| 0 | 5.26924 |
| 0 | 6.16167 |
| 0 | 5.60968 |
| 0 | 8.06094 |
| 0 | 6.44204 |
| 0 | 5.37178 |
| 0 | 5.51922 |
| 0 | 5.55091 |
| 0 | 5.16409 |
| 0 | 5.31026 |
| 0 | 5.64551 |
| 0 | 6.6377  |

|   |         |
|---|---------|
| 0 | 6.18115 |
| 0 | 5.1894  |
| 0 | 5.82661 |
| 0 | 5.48119 |
| 0 | 5.64293 |
| 0 | 5.17487 |
| 0 | 7.16888 |
| 0 | 5.2157  |
| 0 | 7.05136 |
| 0 | 7.75117 |
| 0 | 8.79162 |
| 0 | 5.44194 |
| 0 | 5.30066 |
| 0 | 6.18397 |
| 0 | 5.20986 |
| 0 | 5.58587 |
| 0 | 5.23791 |
| 0 | 5.1592  |
| 0 | 6.43865 |
| 0 | 5.43762 |
| 0 | 6.35842 |
| 0 | 10.1032 |
| 0 | 5.20835 |
| 0 | 5.38924 |
| 0 | 7.01835 |
| 0 | 6.1412  |
| 0 | 6.03611 |
| 0 | 5.33442 |
| 0 | 5.24946 |
| 0 | 6.20613 |
| 0 | 5.19663 |
| 0 | 5.44514 |
| 0 | 6.1081  |
| 0 | 5.17483 |
| 0 | 6.82004 |
| 0 | 5.42755 |
| 0 | 5.56684 |
| 0 | 6.70873 |
| 0 | 6.02065 |
| 0 | 8.17999 |
| 0 | 6.25422 |
| 0 | 7.16072 |
| 0 | 13.1125 |
| 0 | 9.39633 |
| 0 | 5.47032 |
| 0 | 7.45744 |
| 0 | 5.31853 |

|   |         |
|---|---------|
| 0 | 6.09728 |
| 0 | 6.09728 |
| 0 | 6.11229 |
| 0 | 5.64193 |
| 0 | 5.81074 |
| 0 | 8.00858 |
| 0 | 10.2204 |
| 0 | 6.00133 |
| 0 | 8.45123 |
| 0 | 7.84683 |
| 0 | 7.48924 |
| 0 | 5.17359 |
| 0 | 5.26011 |
| 0 | 5.34354 |
| 0 | 7.53424 |
| 0 | 8.09207 |
| 0 | 5.24619 |
| 0 | 5.34304 |
| 0 | 6.12526 |
| 0 | 8.3104  |
| 0 | 5.69684 |
| 0 | 6.15073 |
| 0 | 5.47284 |
| 0 | 5.60302 |
| 0 | 5.72147 |
| 0 | 6.09252 |
| 0 | 8.68477 |
| 0 | 6.33918 |
| 0 | 5.5323  |
| 0 | 5.26277 |
| 0 | 11.18   |
| 0 | 5.61456 |
| 0 | 6.02238 |
| 0 | 10.1674 |
| 0 | 14.0377 |
| 0 | 9.29283 |
| 0 | 5.24015 |
| 0 | 6.43815 |
| 0 | 5.56119 |
| 0 | 5.53809 |
| 0 | 5.42528 |
| 0 | 5.38042 |
| 0 | 5.58061 |
| 0 | 6.02337 |
| 0 | 6.49471 |
| 0 | 5.27269 |
| 0 | 5.25212 |

|   |         |
|---|---------|
| 0 | 6.05261 |
| 0 | 7.2291  |
| 0 | 8.0584  |
| 0 | 8.0584  |
| 0 | 8.48877 |
| 0 | 5.42157 |
| 0 | 6.43398 |
| 0 | 6.43398 |
| 0 | 6.38483 |
| 0 | 5.4342  |
| 0 | 5.324   |
| 0 | 5.51081 |
| 0 | 5.19759 |
| 0 | 5.23171 |
| 0 | 5.35507 |
| 0 | 5.38472 |
| 0 | 5.87279 |
| 0 | 7.42841 |
| 0 | 5.82727 |
| 0 | 5.20488 |
| 0 | 6.1141  |
| 0 | 5.34762 |
| 0 | 5.55664 |
| 0 | 5.42141 |
| 0 | 5.50686 |
| 0 | 5.19706 |
| 0 | 6.17067 |
| 0 | 7.74377 |
| 0 | 7.39275 |
| 0 | 5.66111 |
| 0 | 5.66111 |
| 0 | 5.25109 |
| 0 | 5.34774 |
| 0 | 6.31417 |
| 0 | 5.31747 |
| 0 | 5.55895 |
| 0 | 7.44507 |
| 0 | 5.33052 |
| 0 | 5.67302 |
| 0 | 5.25851 |
| 0 | 7.32089 |
| 0 | 8.7769  |
| 0 | 6.35684 |
| 0 | 6.36546 |
| 0 | 7.05782 |
| 0 | 6.66412 |
| 0 | 6.18071 |

|   |         |
|---|---------|
| 0 | 5.54679 |
| 0 | 5.44276 |
| 0 | 5.36006 |
| 0 | 6.33401 |
| 0 | 6.17114 |
| 0 | 5.22101 |
| 0 | 5.41831 |
| 0 | 6.20488 |
| 0 | 5.36097 |
| 0 | 5.50539 |
| 0 | 7.34888 |
| 0 | 5.28068 |
| 0 | 10.0064 |
| 0 | 6.43235 |
| 0 | 6.44435 |
| 0 | 8.92556 |
| 0 | 5.21364 |
| 0 | 8.59287 |
| 0 | 8.38779 |
| 0 | 5.29482 |
| 0 | 9.39319 |
| 0 | 5.56487 |
| 0 | 5.31185 |
| 0 | 6.16975 |
| 0 | 6.28282 |
| 0 | 5.2854  |
| 0 | 5.48053 |
| 0 | 5.17399 |
| 0 | 8.59716 |
| 0 | 6.01265 |
| 0 | 10.0041 |
| 0 | 5.36557 |
| 0 | 5.15964 |
| 0 | 5.45095 |
| 0 | 7.25222 |
| 0 | 5.29878 |
| 0 | 6.10453 |
| 0 | 6.03211 |
| 0 | 11.1139 |
| 0 | 9.08467 |
| 0 | 5.37288 |
| 0 | 5.6359  |
| 0 | 6.01862 |
| 0 | 5.39655 |
| 0 | 5.33461 |
| 0 | 5.41582 |
| 0 | 5.31221 |



|   |         |
|---|---------|
| 0 | 8.07389 |
| 0 | 5.25988 |
| 0 | 6.42773 |
| 0 | 5.17562 |
| 0 | 6.08299 |
| 0 | 6.52654 |
| 0 | 5.32993 |
| 0 | 5.50451 |
| 0 | 5.23911 |
| 0 | 7.26329 |
| 0 | 6.0617  |
| 0 | 5.67725 |
| 0 | 5.15893 |
| 0 | 5.16997 |
| 0 | 8.08609 |
| 0 | 5.55752 |
| 0 | 5.3203  |
| 0 | 5.32252 |
| 0 | 6.46046 |
| 0 | 5.37116 |
| 0 | 5.58969 |
| 0 | 7.0121  |
| 0 | 5.27734 |
| 0 | 6.40179 |
| 0 | 5.33193 |
| 0 | 6.03718 |
| 0 | 5.24768 |
| 0 | 5.73212 |
| 0 | 5.69925 |
| 0 | 5.27507 |
| 0 | 5.31409 |
| 0 | 5.56415 |
| 0 | 5.46949 |
| 0 | 10.3282 |
| 0 | 11.4751 |
| 0 | 5.39161 |
| 0 | 5.83243 |
| 0 | 5.25203 |
| 0 | 7.15279 |
| 0 | 7.15279 |
| 0 | 7.04534 |
| 0 | 9.11133 |
| 0 | 6.90264 |
| 0 | 12.4025 |
| 0 | 5.16564 |
| 0 | 5.27442 |
| 0 | 5.79737 |

|   |         |
|---|---------|
| 0 | 7.472   |
| 0 | 7.23171 |
| 0 | 8.4225  |
| 0 | 5.56563 |
| 0 | 5.29234 |
| 0 | 5.43659 |
| 0 | 6.53523 |
| 0 | 5.16613 |
| 0 | 7.01977 |
| 0 | 6.072   |
| 0 | 5.37819 |
| 0 | 5.26441 |
| 0 | 5.26971 |
| 0 | 8.05458 |
| 0 | 8.05458 |
| 0 | 6.07159 |
| 0 | 6.07159 |
| 0 | 5.48613 |
| 0 | 5.28179 |
| 0 | 8.11679 |
| 0 | 5.96473 |
| 0 | 5.16332 |
| 0 | 5.31319 |
| 0 | 6.1197  |
| 0 | 5.94284 |
| 0 | 6.10292 |
| 0 | 10.5129 |
| 0 | 6.5841  |
| 0 | 5.49695 |
| 0 | 5.18522 |
| 0 | 5.42259 |
| 0 | 5.42259 |
| 0 | 5.55753 |
| 0 | 5.2114  |
| 0 | 6.85358 |
| 0 | 5.38276 |
| 0 | 5.36725 |
| 0 | 6.28979 |
| 0 | 5.66122 |
| 0 | 5.57373 |
| 0 | 5.93406 |
| 0 | 5.20231 |
| 0 | 8.1033  |
| 0 | 8.55754 |
| 0 | 5.67341 |
| 0 | 5.34132 |
| 0 | 5.52031 |

|   |         |
|---|---------|
| 0 | 5.18483 |
| 0 | 7.09259 |
| 0 | 5.17935 |
| 0 | 5.46161 |
| 0 | 5.20834 |
| 0 | 6.09025 |
| 0 | 8.04158 |
| 0 | 5.35464 |
| 0 | 5.43443 |
| 0 | 5.18433 |
| 0 | 5.32885 |
| 0 | 5.16916 |
| 0 | 6.32901 |
| 0 | 5.30689 |
| 0 | 7.33832 |
| 0 | 7.37207 |
| 0 | 10.3696 |
| 0 | 5.32348 |
| 0 | 7.26489 |
| 0 | 7.0128  |
| 0 | 5.68436 |
| 0 | 5.65222 |
| 0 | 5.29763 |
| 0 | 5.48957 |
| 0 | 7.67282 |
| 0 | 5.23791 |
| 0 | 5.75387 |
| 0 | 5.33431 |
| 0 | 5.35957 |
| 0 | 5.53505 |
| 0 | 5.53505 |
| 0 | 5.2377  |
| 0 | 5.36992 |
| 0 | 6.61075 |
| 0 | 5.74954 |
| 0 | 6.21328 |
| 0 | 5.21637 |
| 0 | 5.86436 |
| 0 | 5.40931 |
| 0 | 6.81433 |
| 0 | 5.34157 |
| 0 | 7.13288 |
| 0 | 7.94392 |
| 0 | 8.43459 |
| 0 | 5.42739 |
| 0 | 7.07189 |
| 0 | 5.6417  |

|   |         |
|---|---------|
| 0 | 5.18315 |
| 0 | 5.23926 |
| 0 | 6.36028 |
| 0 | 6.36028 |
| 0 | 6.49008 |
| 0 | 5.25933 |
| 0 | 6.05025 |
| 0 | 8.04076 |
| 0 | 6.21221 |
| 0 | 10.5207 |
| 0 | 6.09941 |
| 0 | 5.37775 |
| 0 | 7.52498 |
| 0 | 7.08844 |
| 0 | 5.26099 |
| 0 | 5.21528 |
| 0 | 5.20164 |
| 0 | 6.72056 |
| 0 | 5.19096 |
| 0 | 6.37876 |
| 0 | 8.40622 |
| 0 | 5.36725 |
| 0 | 6.4113  |
| 0 | 5.2279  |
| 0 | 7.64101 |
| 0 | 6.17625 |
| 0 | 6.12646 |
| 0 | 5.24728 |
| 0 | 7.00888 |
| 0 | 6.21473 |
| 0 | 5.60309 |
| 0 | 7.57476 |
| 0 | 7.58107 |
| 0 | 5.27778 |
| 0 | 5.23729 |
| 0 | 6.77732 |
| 0 | 6.28822 |
| 0 | 5.45495 |
| 0 | 6.62883 |
| 0 | 5.2031  |
| 0 | 8.31575 |
| 0 | 6.89961 |
| 0 | 5.19105 |
| 0 | 5.18665 |
| 0 | 5.34537 |
| 0 | 6.04841 |
| 0 | 7.64991 |

|   |         |
|---|---------|
| 0 | 5.19646 |
| 0 | 5.42488 |
| 0 | 6.42878 |
| 0 | 6.38022 |
| 0 | 5.64809 |
| 0 | 6.15563 |
| 0 | 7.25618 |
| 0 | 6.37797 |
| 0 | 5.58807 |
| 0 | 7.57035 |
| 0 | 6.27952 |
| 0 | 5.69896 |
| 0 | 5.55386 |
| 0 | 8.38467 |
| 0 | 5.16292 |
| 0 | 5.16292 |
| 0 | 5.17782 |
| 0 | 6.54038 |
| 0 | 6.01996 |
| 0 | 5.19939 |
| 0 | 7.14397 |
| 0 | 6.19073 |
| 0 | 5.44305 |
| 0 | 5.19827 |
| 0 | 5.18672 |
| 0 | 7.45588 |
| 0 | 8.11962 |
| 0 | 7.05051 |
| 0 | 5.6446  |
| 0 | 5.27284 |
| 0 | 6.116   |
| 0 | 8.54468 |
| 0 | 10.0355 |
| 0 | 6.38778 |
| 0 | 5.24943 |
| 0 | 5.24207 |
| 0 | 5.37677 |
| 0 | 6.15184 |
| 0 | 6.09844 |
| 0 | 6.02499 |
| 0 | 5.54691 |
| 0 | 6.16397 |
| 0 | 5.62154 |
| 0 | 6.15905 |
| 0 | 6.79853 |
| 0 | 7.12867 |
| 0 | 7.27638 |

|        |         |
|--------|---------|
| 0      | 12.0575 |
| 0      | 5.49907 |
| 0      | 6.00792 |
| 0      | 6.36382 |
| 0      | 10.006  |
| 0      | 5.34601 |
| 0      | 5.51824 |
| 0      | 5.56453 |
| 0      | 6.26415 |
| 0.3125 | 8.03625 |
| 0      | 6.98332 |
| 0      | 5.37789 |
| 0      | 5.35495 |
| 0      | 6.27637 |
| 0      | 7.00825 |
| 0      | 10.1291 |
| 0      | 5.37515 |
| 0      | 5.33708 |
| 0      | 5.35598 |
| 0      | 8.44857 |
| 0      | 5.51025 |
| 0      | 5.21201 |
| 0      | 5.28186 |
| 0      | 6.17229 |
| 0      | 5.17498 |
| 0      | 5.33956 |
| 0      | 6.35288 |
| 0      | 5.89936 |
| 0      | 6.75129 |
| 0      | 5.15722 |
| 0      | 5.23667 |
| 0      | 6.25647 |
| 0      | 5.82833 |
| 0      | 6.10851 |
| 0      | 5.37782 |
| 0      | 5.18462 |
| 0      | 5.18392 |
| 0      | 6.14284 |
| 0      | 5.39846 |
| 0      | 6.14724 |
| 0      | 7.13655 |
| 0      | 5.27078 |
| 0      | 6.07549 |
| 0      | 5.88455 |
| 0      | 7.33779 |
| 0      | 7.33779 |
| 0      | 5.21248 |

|   |         |
|---|---------|
| 0 | 5.27645 |
| 0 | 5.44093 |
| 0 | 7.02267 |
| 0 | 8.028   |
| 0 | 5.21718 |
| 0 | 7.03641 |
| 0 | 5.39721 |
| 0 | 7.46104 |
| 0 | 5.54536 |
| 0 | 5.65491 |
| 0 | 5.65351 |
| 0 | 5.30161 |
| 0 | 6.46011 |
| 0 | 6.37377 |
| 0 | 5.66226 |
| 0 | 6.05627 |
| 0 | 6.46325 |
| 0 | 5.33137 |
| 0 | 6.0263  |
| 0 | 6.0263  |
| 0 | 5.94535 |
| 0 | 5.17098 |
| 0 | 6.13131 |
| 0 | 6.69454 |
| 0 | 5.26221 |
| 0 | 6.09483 |
| 0 | 5.50004 |
| 0 | 7.17545 |
| 0 | 6.13867 |
| 0 | 5.22617 |
| 0 | 7.46113 |
| 0 | 5.36785 |
| 0 | 7.83615 |
| 0 | 5.19596 |
| 0 | 6.975   |
| 0 | 9.4754  |
| 0 | 5.62637 |
| 0 | 5.31851 |
| 0 | 6.37018 |
| 0 | 5.62966 |
| 0 | 6.00917 |
| 0 | 7.08764 |
| 0 | 6.02444 |
| 0 | 5.26076 |
| 0 | 6.22083 |
| 0 | 6.44777 |
| 0 | 5.51674 |

|          |         |
|----------|---------|
| 0        | 6.31882 |
| 0        | 5.36419 |
| 0        | 6.14934 |
| 0        | 5.69729 |
| 0        | 5.8535  |
| 0        | 5.28767 |
| 0        | 7.17192 |
| 0        | 5.22562 |
| 0        | 5.76088 |
| 0        | 5.71002 |
| 0        | 6.50423 |
| 0        | 6.10477 |
| 0        | 5.58498 |
| 0        | 5.50457 |
| 0        | 7.51017 |
| 0        | 5.3421  |
| 0        | 9.16507 |
| 0        | 8.32331 |
| 0        | 5.24153 |
| 0        | 5.62739 |
| 0.545455 | 8.5635  |
| 0        | 5.29049 |
| 0        | 6.88775 |
| 0        | 5.34734 |
| 0        | 9.60983 |
| 0        | 5.63257 |
| 0        | 5.19695 |
| 0        | 7.60667 |
| 0        | 6.05364 |
| 0        | 6.45907 |
| 0        | 6.56733 |
| 0        | 6.06315 |
| 0        | 5.2627  |
| 0        | 6.88974 |
| 0        | 5.58912 |
| 0        | 6.99709 |
| 0        | 6.12662 |
| 0        | 5.94198 |
| 0        | 6.03594 |
| 0        | 5.30752 |
| 0        | 5.38262 |
| 0        | 5.38262 |
| 0        | 5.54486 |
| 0        | 5.32497 |
| 0        | 5.38618 |
| 0        | 5.2036  |
| 0        | 5.17071 |



|   |         |
|---|---------|
| 0 | 5.66934 |
| 0 | 7.47944 |
| 0 | 7.32728 |
| 0 | 6.02834 |
| 0 | 5.22707 |
| 0 | 5.20363 |
| 0 | 5.46077 |
| 0 | 5.46077 |
| 0 | 8.19415 |
| 0 | 5.21549 |
| 0 | 5.34048 |
| 0 | 8.25671 |
| 0 | 8.0792  |
| 0 | 5.2317  |
| 0 | 5.3798  |
| 0 | 5.3798  |
| 0 | 5.27843 |
| 0 | 5.4995  |
| 0 | 6.31161 |
| 0 | 6.22556 |
| 0 | 5.22493 |
| 0 | 6.68532 |
| 0 | 5.18082 |
| 0 | 5.35807 |
| 0 | 7.1358  |
| 0 | 7.57511 |
| 0 | 11.3489 |
| 0 | 5.4451  |
| 0 | 6.44809 |
| 0 | 5.29432 |
| 0 | 5.73862 |
| 0 | 5.6487  |
| 0 | 6.3081  |
| 0 | 5.72714 |
| 0 | 5.44148 |
| 0 | 6.05407 |
| 0 | 6.13279 |
| 0 | 5.18026 |
| 0 | 5.24701 |
| 0 | 5.99725 |
| 0 | 5.44542 |
| 0 | 6.14548 |
| 0 | 5.27994 |
| 0 | 5.19496 |
| 0 | 7.06285 |
| 0 | 8.8726  |
| 0 | 5.5485  |

|   |         |
|---|---------|
| 0 | 5.26301 |
| 0 | 9.60139 |
| 0 | 5.40697 |
| 0 | 6.22114 |
| 0 | 5.47358 |
| 0 | 5.16088 |
| 0 | 6.07794 |
| 0 | 5.48849 |
| 0 | 5.36402 |
| 0 | 10.0474 |
| 0 | 5.25481 |
| 0 | 6.40485 |
| 0 | 6.98603 |
| 0 | 5.64238 |
| 0 | 5.54881 |
| 0 | 5.43307 |
| 0 | 7.53054 |
| 0 | 7.53054 |
| 0 | 6.36293 |
| 0 | 6.36293 |
| 0 | 5.59056 |
| 0 | 8.14512 |
| 0 | 6.24675 |
| 0 | 5.56943 |
| 0 | 6.05034 |
| 0 | 5.21183 |
| 0 | 6.23548 |
| 0 | 5.46772 |
| 0 | 8.5035  |
| 0 | 9.14829 |
| 0 | 5.28257 |
| 0 | 5.52928 |
| 0 | 5.4539  |
| 0 | 5.47345 |
| 0 | 5.2622  |
| 0 | 5.19398 |
| 0 | 7.03862 |
| 0 | 5.28081 |
| 0 | 5.38762 |
| 0 | 5.38762 |
| 0 | 5.2504  |
| 0 | 5.37769 |
| 0 | 5.26214 |
| 0 | 5.86155 |
| 0 | 5.35595 |
| 0 | 5.51586 |
| 0 | 6.70039 |

|   |         |
|---|---------|
| 0 | 6.36756 |
| 0 | 5.6522  |
| 0 | 5.4224  |
| 0 | 9.69915 |
| 0 | 5.4926  |
| 0 | 5.4926  |
| 0 | 7.36199 |
| 0 | 5.33788 |
| 0 | 5.47964 |
| 0 | 7.891   |
| 0 | 5.36254 |
| 0 | 7.31818 |
| 0 | 8.16276 |
| 0 | 5.19888 |
| 0 | 5.28451 |
| 0 | 9.91092 |
| 0 | 7.12262 |
| 0 | 5.43523 |
| 0 | 5.22951 |
| 0 | 6.02796 |
| 0 | 9.11198 |
| 0 | 6.04247 |
| 0 | 5.42867 |
| 0 | 5.74201 |
| 0 | 5.74201 |
| 0 | 6.25624 |
| 0 | 9.90904 |
| 0 | 5.37171 |
| 0 | 5.33335 |
| 0 | 5.2971  |
| 0 | 7.8866  |
| 0 | 5.35476 |
| 0 | 5.35476 |
| 0 | 5.79648 |
| 0 | 6.03429 |
| 0 | 5.69756 |
| 0 | 6.27618 |
| 0 | 5.36445 |
| 0 | 5.24617 |
| 0 | 5.19212 |
| 0 | 7.23522 |
| 0 | 5.16241 |
| 0 | 5.30229 |
| 0 | 9.51477 |
| 0 | 5.21838 |
| 0 | 9.14174 |
| 0 | 6.06304 |

|   |         |
|---|---------|
| 0 | 5.21473 |
| 0 | 7.2258  |
| 0 | 8.66104 |
| 0 | 5.7107  |
| 0 | 6.36485 |
| 0 | 5.45891 |
| 0 | 5.21751 |
| 0 | 6.35271 |
| 0 | 7.1582  |
| 0 | 7.1003  |
| 0 | 9.98929 |
| 0 | 9.04145 |
| 0 | 6.09003 |
| 0 | 11.2248 |
| 0 | 6.33778 |
| 0 | 7.1739  |
| 0 | 5.23978 |
| 0 | 5.21499 |
| 0 | 5.1764  |
| 0 | 5.21319 |
| 0 | 6.58586 |
| 0 | 10.0912 |
| 0 | 6.4919  |
| 0 | 10.364  |
| 0 | 6.25865 |
| 0 | 5.90525 |
| 0 | 6.12572 |
| 0 | 7.07398 |
| 0 | 5.97213 |
| 0 | 5.48275 |
| 0 | 5.2268  |
| 0 | 6.19643 |
| 0 | 16.4871 |
| 0 | 5.34577 |
| 0 | 5.45338 |
| 0 | 7.19596 |
| 0 | 5.41295 |
| 0 | 5.24159 |
| 0 | 5.75865 |
| 0 | 5.28179 |
| 0 | 5.51184 |
| 0 | 6.43792 |
| 0 | 7.1618  |
| 0 | 6.06981 |
| 0 | 5.44964 |
| 0 | 5.44964 |
| 0 | 7.27123 |

|   |         |
|---|---------|
| 0 | 6.45931 |
| 0 | 5.78633 |
| 0 | 5.72448 |
| 0 | 6.5629  |
| 0 | 6.01577 |
| 0 | 6.21696 |
| 0 | 5.23472 |
| 0 | 5.71117 |
| 0 | 5.24061 |
| 0 | 5.52237 |
| 0 | 7.12956 |
| 0 | 5.45028 |
| 0 | 5.23878 |
| 0 | 5.55935 |
| 0 | 5.60133 |
| 0 | 7.01607 |
| 0 | 5.19088 |
| 0 | 5.28963 |
| 0 | 6.69946 |
| 0 | 5.33532 |
| 0 | 5.48952 |
| 0 | 7.24045 |
| 0 | 5.7139  |
| 0 | 8.92185 |
| 0 | 5.28809 |
| 0 | 5.98883 |
| 0 | 5.58928 |
| 0 | 6.04919 |
| 0 | 5.55961 |
| 0 | 7.36124 |
| 0 | 6.35332 |
| 0 | 5.39531 |
| 0 | 5.21334 |
| 0 | 6.70091 |
| 0 | 5.23455 |
| 0 | 5.18729 |
| 0 | 5.37938 |
| 0 | 5.32253 |
| 0 | 5.32253 |
| 0 | 7.40254 |
| 0 | 6.04939 |
| 0 | 5.51711 |
| 0 | 5.26233 |
| 0 | 5.4918  |
| 0 | 5.30353 |
| 0 | 5.71161 |
| 0 | 6.03715 |

|   |         |
|---|---------|
| 0 | 6.19451 |
| 0 | 5.32147 |
| 0 | 6.01706 |
| 0 | 5.25843 |
| 0 | 5.22215 |
| 0 | 5.35243 |
| 0 | 5.36064 |
| 0 | 5.2291  |
| 0 | 5.25158 |
| 0 | 5.25158 |
| 0 | 8.33191 |
| 0 | 8.33191 |
| 0 | 9.0079  |
| 0 | 7.23706 |
| 0 | 6.12835 |
| 0 | 6.30915 |
| 0 | 5.64179 |
| 0 | 7.15164 |
| 0 | 7.10955 |
| 0 | 5.2923  |
| 0 | 5.42697 |
| 0 | 6.41993 |
| 0 | 6.14074 |
| 0 | 10.4254 |
| 0 | 5.24183 |
| 0 | 7.01113 |
| 0 | 7.05983 |
| 0 | 7.03181 |
| 0 | 5.62719 |
| 0 | 8.30307 |
| 0 | 8.11028 |
| 0 | 11.9607 |
| 0 | 5.26621 |
| 0 | 9.19104 |
| 0 | 5.55494 |
| 0 | 6.23913 |
| 0 | 5.16171 |
| 0 | 6.50163 |
| 0 | 5.42339 |
| 0 | 6.09469 |
| 0 | 6.06603 |
| 0 | 7.33604 |
| 0 | 5.75802 |
| 0 | 5.55186 |
| 0 | 5.97845 |
| 0 | 5.23775 |
| 0 | 6.55958 |

|   |         |
|---|---------|
| 0 | 6.17285 |
| 0 | 7.25592 |
| 0 | 6.14525 |
| 0 | 5.81685 |
| 0 | 6.31053 |
| 0 | 6.00412 |
| 0 | 6.00626 |
| 0 | 5.4531  |
| 0 | 5.2378  |
| 0 | 5.23495 |
| 0 | 5.31933 |
| 0 | 6.12123 |
| 0 | 7.06177 |
| 0 | 7.13236 |
| 0 | 6.1764  |
| 0 | 5.21202 |
| 0 | 6.21407 |
| 0 | 6.23963 |
| 0 | 5.16625 |
| 0 | 6.1433  |
| 0 | 5.46797 |
| 0 | 5.48399 |
| 0 | 5.58239 |
| 0 | 8.01772 |
| 0 | 8.04778 |
| 0 | 6.15194 |
| 0 | 5.39274 |
| 0 | 6.17414 |
| 0 | 7.1535  |
| 0 | 7.05099 |
| 0 | 6.63256 |
| 0 | 6.20646 |
| 0 | 5.87882 |
| 0 | 6.50632 |
| 0 | 7.01928 |
| 0 | 7.22683 |
| 0 | 5.47097 |
| 0 | 8.01982 |
| 0 | 6.037   |
| 0 | 6.17633 |
| 0 | 5.47759 |
| 0 | 7.28603 |
| 0 | 5.59415 |
| 0 | 6.01851 |
| 0 | 8.22868 |
| 0 | 5.41798 |
| 0 | 5.23123 |

|   |         |
|---|---------|
| 0 | 5.22138 |
| 0 | 7.42432 |
| 0 | 7.04805 |
| 0 | 5.19594 |
| 0 | 5.71252 |
| 0 | 7.3928  |
| 0 | 7.47546 |
| 0 | 5.17443 |
| 0 | 6.46795 |
| 0 | 7.42457 |
| 0 | 8.07018 |
| 0 | 6.05284 |
| 0 | 5.2962  |
| 0 | 6.10903 |
| 0 | 6.11466 |
| 0 | 5.5517  |
| 0 | 6.17419 |
| 0 | 9.0914  |
| 0 | 5.39498 |
| 0 | 5.15935 |
| 0 | 8.05111 |
| 0 | 5.43891 |
| 0 | 5.32925 |
| 0 | 10.0988 |
| 0 | 5.2945  |
| 0 | 5.31126 |
| 0 | 5.31968 |
| 0 | 5.17626 |
| 0 | 5.3528  |
| 0 | 7.11183 |
| 0 | 5.38229 |
| 0 | 8.05596 |
| 0 | 5.16659 |
| 0 | 7.02982 |
| 0 | 5.24901 |
| 0 | 5.17882 |
| 0 | 5.44611 |
| 0 | 7.20692 |
| 0 | 5.35955 |
| 0 | 8.37932 |
| 0 | 7.30576 |
| 0 | 5.88064 |
| 0 | 5.55138 |
| 0 | 5.55138 |
| 0 | 5.56824 |
| 0 | 9.22501 |
| 0 | 6.07928 |



|   |         |
|---|---------|
| 0 | 6.02145 |
| 0 | 5.16413 |
| 0 | 5.51389 |
| 0 | 5.32919 |
| 0 | 5.31355 |
| 0 | 5.20449 |
| 0 | 5.28139 |
| 0 | 5.34847 |
| 0 | 6.56594 |
| 0 | 5.33897 |
| 0 | 5.30194 |
| 0 | 5.8126  |
| 0 | 6.10834 |
| 0 | 5.64213 |
| 0 | 5.26932 |
| 0 | 6.05033 |
| 0 | 6.00303 |
| 0 | 5.42465 |
| 0 | 5.2665  |
| 0 | 7.00136 |
| 0 | 7.05725 |
| 0 | 8.14678 |
| 0 | 5.82155 |
| 0 | 5.36694 |
| 0 | 6.14408 |
| 0 | 6.93481 |
| 0 | 5.62625 |
| 0 | 7.12784 |
| 0 | 5.43293 |
| 0 | 6.0559  |
| 0 | 5.30368 |
| 0 | 6.19275 |
| 0 | 6.33638 |
| 0 | 6.33522 |
| 0 | 7.08562 |
| 0 | 6.23516 |
| 0 | 5.71271 |
| 0 | 7.88393 |
| 0 | 5.76228 |
| 0 | 5.38482 |
| 0 | 5.46128 |
| 0 | 5.50948 |
| 0 | 6.04465 |
| 0 | 5.21133 |
| 0 | 5.37092 |
| 0 | 5.37092 |
| 0 | 5.72255 |

|          |         |
|----------|---------|
| 0        | 5.43877 |
| 0        | 5.23807 |
| 0        | 5.51695 |
| 0        | 6.47451 |
| 0        | 8.38965 |
| 0        | 5.22526 |
| 0        | 5.56053 |
| 0        | 6.30105 |
| 0        | 6.30105 |
| 0        | 6.49694 |
| 0        | 7.45017 |
| 0        | 5.32664 |
| 0        | 6.13882 |
| 0        | 6.44598 |
| 0        | 8.05831 |
| 0        | 8.05831 |
| 0        | 8.83592 |
| 0        | 8.83592 |
| 0.129032 | 11.0456 |
| 0        | 9.30807 |
| 0        | 6.04493 |
| 0        | 5.28429 |
| 0        | 6.17074 |
| 0        | 8.38226 |
| 0        | 7.05035 |
| 0        | 5.30577 |
| 0        | 5.59274 |
| 0        | 5.53174 |

## Gene List WT H3K14ac

| chromosome | feature start | feature end | feature      | chromosome | region start | region end |
|------------|---------------|-------------|--------------|------------|--------------|------------|
| 1          | 194733923     | 194742422   | NM_181546    | chr1       | 194734202    | 194734931  |
| 1          | 192724240     | 192732739   | BC010797     | chr1       | 192725356    | 192725728  |
| 1          | 190976123     | 190984622   | BC056167     | chr1       | 190980600    | 190981159  |
| 1          | 187140108     | 187148607   | NM_176943    | chr1       | 187146584    | 187147153  |
| 1          | 186430782     | 186439396   | NM_008250    | chr1       | 186432905    | 186433689  |
| 1          | 183756234     | 183764733   | D10727       | chr1       | 183761887    | 183762437  |
| 1          | 182851641     | 182860196   | NM_010145    | chr1       | 182851942    | 182852811  |
| 1          | 182765697     | 182785739   | NM_144794    | chr1       | 182773753    | 182774462  |
| 2          | 181761309     | 181773112   | NM_153594    | chr2       | 181771940    | 181772567  |
| 2          | 180966086     | 180974585   | NM_015730    | chr2       | 180966078    | 180966801  |
| 1          | 180695650     | 180704149   | NM_177757    | chr1       | 180700813    | 180701429  |
| 2          | 180395837     | 180404336   | BC033602     | chr2       | 180400298    | 180401410  |
| 1          | 179082920     | 179091442   | NM_011785    | chr1       | 179088560    | 179089190  |
| 2          | 178354015     | 178362514   | NM_198656    | chr2       | 178358396    | 178359050  |
| 1          | 177462868     | 177471367   | NM_133809    | chr1       | 177468571    | 177469247  |
| 1          | 175982156     | 175997949   | NM_146305    | chr1       | 175986855    | 175987486  |
| 1          | 175952223     | 175960722   | NM_001005520 | chr1       | 175953273    | 175954132  |
| 1          | 175930135     | 175938634   | NM_001011844 | chr1       | 175935550    | 175936899  |
| 1          | 175865886     | 175874466   | NM_008327    | chr1       | 175873161    | 175873979  |
| 1          | 175872608     | 175889549   | NM_146717    | chr1       | 175873161    | 175873979  |
| 1          | 175865886     | 175874466   | NM_008327    | chr1       | 175868619    | 175869232  |
| 1          | 175816890     | 175825389   | NM_011940    | chr1       | 175821893    | 175822588  |
| 1          | 175816890     | 175825389   | NM_011940    | chr1       | 175818788    | 175819789  |
| 2          | 173747304     | 173755803   | NM_213733    | chr2       | 173748289    | 173748806  |
| 2          | 173374510     | 173383020   | NM_019806    | chr2       | 173374980    | 173375606  |
| 1          | 173219687     | 173228186   | NM_001005508 | chr1       | 173221261    | 173221881  |
| 1          | 173030415     | 173038914   | AY304481     | chr1       | 173030446    | 173031285  |
| 1          | 172001126     | 172017621   | NM_133806    | chr1       | 172004472    | 172005057  |
| 1          | 171486176     | 171494714   | NM_009063    | chr1       | 171492808    | 171493419  |
| 1          | 167961103     | 167969641   | NM_021610    | chr1       | 167967071    | 167967562  |
| 1          | 167962055     | 167970573   | NM_001033344 | chr1       | 167967071    | 167967562  |
| 1          | 167836791     | 167845309   | NM_011137    | chr1       | 167836800    | 167837448  |
| 2          | 167320711     | 167329210   | NM_023230    | chr2       | 167322868    | 167323749  |
| X          | 165217769     | 165226268   | BC053704     | chrX       | 165225796    | 165226247  |
| X          | 165121163     | 165129740   | NM_025743    | chrX       | 165125650    | 165126250  |
| 2          | 164740841     | 164749382   | NM_170701    | chr2       | 164747351    | 164747947  |
| 1          | 164644110     | 164655224   | NM_144878    | chr1       | 164645883    | 164646528  |
| 2          | 164633437     | 164641938   | NM_013599    | chr2       | 164638353    | 164639029  |
| X          | 164527484     | 164537314   | NM_009666    | chrX       | 164531070    | 164532015  |
| 2          | 164507891     | 164527521   | NM_008906    | chr2       | 164524487    | 164525080  |
| 2          | 164517202     | 164530661   | BC116354     | chr2       | 164524487    | 164525080  |
| 2          | 164088399     | 164096898   | NM_009036    | chr2       | 164095473    | 164096153  |
| 2          | 164093866     | 164102365   | NM_013592    | chr2       | 164095473    | 164096153  |
| X          | 164015445     | 164024007   | NM_010832    | chrX       | 164016361    | 164017067  |

|   |   |           |           |              |      |           |           |
|---|---|-----------|-----------|--------------|------|-----------|-----------|
|   | 1 | 163561783 | 163570359 | BC057865     | chr1 | 163562966 | 163563918 |
| X |   | 162671656 | 162680633 | NM_133211    | chrX | 162672474 | 162673123 |
|   | 2 | 162616982 | 162625485 | NM_026499    | chr2 | 162621500 | 162622170 |
| X |   | 161927308 | 161935821 | NM_019397    | chrX | 161927520 | 161928369 |
| X |   | 161852084 | 161860583 | NM_001007577 | chrX | 161858774 | 161859437 |
| X |   | 160334006 | 160342505 | BC022692     | chrX | 160336333 | 160337118 |
| X |   | 160321907 | 160330440 | NM_029730    | chrX | 160329459 | 160330178 |
| X |   | 160318807 | 160327316 | NM_175027    | chrX | 160323656 | 160324884 |
| X |   | 160321907 | 160330440 | NM_029730    | chrX | 160323656 | 160324884 |
|   | 2 | 160055710 | 160064443 | NM_010658    | chr2 | 160056625 | 160057313 |
| X |   | 159711653 | 159720370 | NM_010216    | chrX | 159718991 | 159719596 |
| X |   | 159599785 | 159608298 | NM_009759    | chrX | 159601699 | 159602699 |
| X |   | 159478585 | 159487236 | NM_027286    | chrX | 159484812 | 159485437 |
| X |   | 159428292 | 159436791 | NM_020626    | chrX | 159432317 | 159433182 |
| X |   | 159417655 | 159426245 | NM_009173    | chrX | 159423114 | 159423697 |
| X |   | 159369567 | 159378102 | NM_019513    | chrX | 159373866 | 159374789 |
| X |   | 159247265 | 159255764 | NM_026887    | chrX | 159253438 | 159254461 |
| X |   | 159247265 | 159255764 | NM_026887    | chrX | 159252137 | 159252754 |
|   | 1 | 158669700 | 158678199 | NM_028333    | chr1 | 158671826 | 158672430 |
|   | 2 | 158350839 | 158361078 | NM_153089    | chr2 | 158359758 | 158360499 |
|   | 2 | 158310354 | 158318872 | NM_175419    | chr2 | 158311586 | 158312264 |
| X |   | 158171001 | 158179559 | NM_178935    | chrX | 158175792 | 158176551 |
| X |   | 158098538 | 158107063 | NM_009031    | chrX | 158103043 | 158103678 |
| X |   | 158098538 | 158107063 | NM_009031    | chrX | 158100607 | 158101331 |
| X |   | 157985207 | 157993708 | NM_178256    | chrX | 157992054 | 157992640 |
| X |   | 157985207 | 157993708 | NM_178256    | chrX | 157985416 | 157986148 |
| X |   | 157904921 | 157913437 | NM_019883    | chrX | 157912785 | 157913307 |
| X |   | 157904921 | 157913437 | NM_019883    | chrX | 157905083 | 157905762 |
|   | 1 | 157791621 | 157805634 | NM_022329    | chr1 | 157804192 | 157804791 |
|   | 1 | 157796014 | 157804637 | NM_144791    | chr1 | 157804192 | 157804791 |
|   | 2 | 157713936 | 157722734 | NM_027434    | chr2 | 157721014 | 157721633 |
| X |   | 157055732 | 157064231 | NM_198409    | chrX | 157058020 | 157059714 |
|   | 2 | 156964511 | 156977523 | NM_019642    | chr2 | 156975105 | 156975754 |
|   | 2 | 156968247 | 156976916 | NM_001039557 | chr2 | 156975105 | 156975754 |
| X |   | 156455298 | 156470872 | AF285577     | chrX | 156465840 | 156466966 |
| X |   | 156455298 | 156470872 | AF285577     | chrX | 156463335 | 156463950 |
|   | 2 | 156406426 | 156415896 | NM_001042487 | chr2 | 156409707 | 156410297 |
| X |   | 155840312 | 155849294 | NM_172783    | chrX | 155846895 | 155847507 |
|   | 2 | 155829785 | 155838284 | NM_025946    | chr2 | 155836614 | 155837243 |
|   | 2 | 155833106 | 155841626 | NM_010911    | chr2 | 155836614 | 155837243 |
|   | 2 | 155785359 | 155795816 | AF345334     | chr2 | 155786194 | 155786798 |
| X |   | 155768452 | 155776951 | BC116644     | chrX | 155770353 | 155770949 |
| X |   | 155768452 | 155776951 | BC116644     | chrX | 155768292 | 155768916 |
| X |   | 155479942 | 155488461 | NM_008810    | chrX | 155485157 | 155485824 |
| X |   | 155046706 | 155055268 | NM_021389    | chrX | 155054472 | 155055093 |
|   | 4 | 155010378 | 155018877 | BC064021     | chr4 | 155013690 | 155014288 |
|   | 4 | 155010378 | 155018877 | BC064021     | chr4 | 155011531 | 155012290 |

|   |   |           |           |              |      |           |           |
|---|---|-----------|-----------|--------------|------|-----------|-----------|
|   | 1 | 154711319 | 154719818 | NM_175460    | chr1 | 154718687 | 154719323 |
| X |   | 154594225 | 154602724 | NM_148945    | chrX | 154597778 | 154598821 |
|   | 2 | 154121934 | 154130458 | NM_172860    | chr2 | 154127628 | 154128325 |
|   | 4 | 154087780 | 154096295 | NM_001033134 | chr4 | 154093047 | 154093694 |
|   | 2 | 153909221 | 153917720 | NM_144890    | chr2 | 153915655 | 153916448 |
|   | 3 | 153810391 | 153823629 | AY351591     | chr3 | 153810768 | 153811479 |
|   | 2 | 153560026 | 153568525 | NM_029599    | chr2 | 153567246 | 153567790 |
|   | 2 | 153560486 | 153569030 | NM_025631    | chr2 | 153567246 | 153567790 |
| X |   | 153384716 | 153393215 | NM_177751    | chrX | 153387976 | 153388588 |
| X |   | 153037223 | 153045816 | NM_025357    | chrX | 153043775 | 153044427 |
| X |   | 153037223 | 153045816 | NM_025357    | chrX | 153041391 | 153042280 |
|   | 4 | 152883978 | 152892477 | NM_001033455 | chr4 | 152885808 | 152886410 |
|   | 2 | 152354903 | 152363439 | NM_010376    | chr2 | 152361320 | 152361806 |
|   | 3 | 152141876 | 152150406 | NM_057172    | chr3 | 152149121 | 152149859 |
|   | 3 | 152144970 | 152153469 | NM_027287    | chr3 | 152149121 | 152149859 |
|   | 3 | 152100787 | 152109336 | NM_016867    | chr3 | 152106057 | 152106566 |
|   | 2 | 152021577 | 152030076 | NM_019705    | chr2 | 152022445 | 152022919 |
|   | 5 | 151456074 | 151464573 | NM_146258    | chr5 | 151461896 | 151462508 |
|   | 5 | 151456074 | 151464573 | NM_146258    | chr5 | 151459102 | 151459717 |
|   | 4 | 151290114 | 151298613 | L48983       | chr4 | 151293355 | 151293883 |
|   | 2 | 151258073 | 151266572 | NM_145535    | chr2 | 151259238 | 151259838 |
|   | 4 | 151163526 | 151173779 | NM_009079    | chr4 | 151171418 | 151172019 |
|   | 4 | 151015934 | 151024531 | NM_133348    | chr4 | 151017350 | 151018018 |
|   | 5 | 150805381 | 150813880 | BC059904     | chr5 | 150809990 | 150810809 |
|   | 2 | 150728297 | 150736820 | NM_026086    | chr2 | 150731463 | 150732173 |
|   | 2 | 150698274 | 150706773 | NM_207204    | chr2 | 150702715 | 150703305 |
| X |   | 150486066 | 150497970 | BC100353     | chrX | 150496701 | 150497300 |
| X |   | 150428007 | 150437540 | NM_020015    | chrX | 150429313 | 150429919 |
| X |   | 150393702 | 150408269 | NM_020018    | chrX | 150404616 | 150405206 |
| X |   | 150370717 | 150380008 | NM_020016    | chrX | 150377486 | 150378320 |
| X |   | 150370717 | 150380008 | NM_020016    | chrX | 150372972 | 150374124 |
| X |   | 150263339 | 150272837 | NM_020019    | chrX | 150265569 | 150266270 |
|   | 4 | 149885773 | 149894389 | NM_011067    | chr4 | 149886628 | 149887534 |
| X |   | 149167009 | 149175508 | NM_001005370 | chrX | 149173542 | 149174272 |
|   | 6 | 149092744 | 149101290 | NM_177101    | chr6 | 149094527 | 149095223 |
| X |   | 149034497 | 149042996 | NM_175429    | chrX | 149036936 | 149037587 |
| X |   | 148893309 | 148901808 | NM_173367    | chrX | 148898834 | 148899731 |
|   | 2 | 148460364 | 148468938 | NM_030059    | chr2 | 148461559 | 148462164 |
|   | 4 | 148267679 | 148276549 | NM_022022    | chr4 | 148267808 | 148268405 |
|   | 1 | 148251884 | 148260407 | NM_153539    | chr1 | 148256137 | 148256778 |
|   | 5 | 148202652 | 148211164 | NM_027872    | chr5 | 148207792 | 148208758 |
|   | 2 | 148132477 | 148140985 | NM_010740    | chr2 | 148132888 | 148133671 |
|   | 5 | 147826251 | 147842581 | BC086321     | chr5 | 147841191 | 147841981 |
|   | 5 | 147757638 | 147766137 | BC082547     | chr5 | 147759848 | 147760466 |
| X |   | 147680621 | 147694343 | NM_029836    | chrX | 147681736 | 147682413 |
|   | 4 | 147396249 | 147404761 | NM_016699    | chr4 | 147402666 | 147403258 |
|   | 4 | 146968720 | 146977219 | BC071264     | chr4 | 146975362 | 146975966 |

|   |   |           |           |              |      |           |           |
|---|---|-----------|-----------|--------------|------|-----------|-----------|
|   | 4 | 146971980 | 146980498 | NM_027426    | chr4 | 146975362 | 146975966 |
|   | 5 | 146892254 | 146901588 | NM_001010941 | chr5 | 146893566 | 146894204 |
| X |   | 146678939 | 146687438 | NM_198105    | chrX | 146686147 | 146686916 |
|   | 6 | 146593749 | 146602269 | NM_025315    | chr6 | 146593343 | 146593873 |
|   | 1 | 146535135 | 146543646 | NM_022881    | chr1 | 146537866 | 146538567 |
| X |   | 146355461 | 146363964 | NM_198110    | chrX | 146361506 | 146362582 |
| X |   | 146355461 | 146363964 | NM_198110    | chrX | 146357955 | 146358888 |
| X |   | 146151878 | 146160998 | NM_030700    | chrX | 146156788 | 146157406 |
| X |   | 146151878 | 146160998 | NM_030700    | chrX | 146152678 | 146153338 |
| X |   | 145987852 | 146004299 | NM_001002272 | chrX | 145992527 | 145993144 |
| X |   | 145924637 | 145933136 | NM_008824    | chrX | 145932616 | 145933103 |
| X |   | 145926324 | 145934865 | NM_029943    | chrX | 145932616 | 145933103 |
| X |   | 145924637 | 145933136 | NM_008824    | chrX | 145931352 | 145931945 |
| X |   | 145926324 | 145934865 | NM_029943    | chrX | 145931352 | 145931945 |
|   | 4 | 145528370 | 145536936 | NM_001037926 | chr4 | 145534395 | 145535528 |
|   | 4 | 144931384 | 144939883 | BC096593     | chr4 | 144937216 | 144938315 |
| X |   | 144929317 | 144937816 | NM_001037716 | chrX | 144936597 | 144937317 |
| X |   | 144929317 | 144937816 | NM_001037716 | chrX | 144934960 | 144936302 |
| X |   | 144929317 | 144937816 | NM_001037716 | chrX | 144933003 | 144933709 |
|   | 4 | 144771482 | 144784069 | NM_001013808 | chr4 | 144781136 | 144781766 |
|   | 4 | 144771482 | 144784069 | NM_001013808 | chr4 | 144777148 | 144777897 |
|   | 5 | 144607975 | 144616474 | AY169789     | chr5 | 144609980 | 144610688 |
|   | 5 | 144608918 | 144617639 | NM_025833    | chr5 | 144609980 | 144610688 |
|   | 3 | 144501813 | 144510596 | NM_053102    | chr3 | 144505882 | 144506491 |
|   | 3 | 144504770 | 144513525 | NM_011828    | chr3 | 144505882 | 144506491 |
| X |   | 144328683 | 144337182 | NM_011022    | chrX | 144334746 | 144335320 |
| X |   | 144328683 | 144337182 | NM_011022    | chrX | 144332503 | 144333428 |
| X |   | 144328683 | 144337182 | NM_011022    | chrX | 144329367 | 144330301 |
|   | 2 | 144213186 | 144221696 | NM_029763    | chr2 | 144216163 | 144216898 |
|   | 5 | 144160806 | 144169345 | NM_146165    | chr5 | 144164225 | 144164867 |
|   | 4 | 144153514 | 144162563 | NM_011303    | chr4 | 144161265 | 144162281 |
| X |   | 143233392 | 143241891 | BC109131     | chrX | 143239091 | 143240048 |
| X |   | 143233392 | 143241891 | BC109131     | chrX | 143237693 | 143238435 |
| X |   | 143233392 | 143241891 | BC109131     | chrX | 143236557 | 143237151 |
| X |   | 143233392 | 143241891 | BC109131     | chrX | 143233398 | 143233968 |
|   | 5 | 143169348 | 143177864 | NM_007393    | chr5 | 143172630 | 143173242 |
|   | 5 | 143080028 | 143088527 | NM_178242    | chr5 | 143080917 | 143081563 |
|   | 6 | 142918799 | 142927674 | NM_011374    | chr6 | 142919421 | 142920067 |
|   | 7 | 142872758 | 142881257 | NM_020285    | chr7 | 142880287 | 142881043 |
|   | 7 | 142872758 | 142881257 | NM_020285    | chr7 | 142879140 | 142879984 |
|   | 7 | 142872758 | 142881257 | NM_020285    | chr7 | 142877926 | 142878505 |
|   | 5 | 142780001 | 142788550 | NM_019943    | chr5 | 142781853 | 142782439 |
| X |   | 142202881 | 142211380 | NM_008312    | chrX | 142205800 | 142206469 |
|   | 6 | 141480842 | 141489455 | NM_021471    | chr6 | 141487990 | 141488587 |
|   | 7 | 141407558 | 141416057 | NM_007459    | chr7 | 141409609 | 141410180 |
|   | 2 | 141241117 | 141249616 | NM_001013802 | chr2 | 141248622 | 141249223 |
|   | 1 | 141232794 | 141242746 | NM_172643    | chr1 | 141239857 | 141240477 |

|   |   |           |           |              |      |           |           |
|---|---|-----------|-----------|--------------|------|-----------|-----------|
|   | 7 | 140812541 | 140821967 | NM_026820    | chr7 | 140820671 | 140821380 |
|   | 7 | 140799060 | 140813303 | NM_053088    | chr7 | 140810218 | 140810957 |
|   | 7 | 140799060 | 140813303 | NM_053088    | chr7 | 140807732 | 140808102 |
|   | 1 | 140774197 | 140786631 | NM_181347    | chr1 | 140778430 | 140779118 |
|   | 1 | 140774197 | 140786631 | NM_181347    | chr1 | 140775376 | 140776739 |
|   | 5 | 140752102 | 140760601 | NM_021528    | chr5 | 140758075 | 140758778 |
|   | 7 | 140703988 | 140713604 | NM_018742    | chr7 | 140707748 | 140708378 |
|   | 7 | 140680599 | 140689315 | NM_029821    | chr7 | 140687086 | 140687773 |
|   | 4 | 140593888 | 140602387 | BC006954     | chr4 | 140598706 | 140599565 |
|   | 7 | 140497276 | 140505777 | NM_146960    | chr7 | 140501667 | 140502264 |
|   | 6 | 140408172 | 140416671 | BC006653     | chr6 | 140413157 | 140413708 |
|   | 4 | 140276757 | 140287399 | NM_008546    | chr4 | 140276988 | 140277589 |
|   | 7 | 140003480 | 140020334 | NM_183147    | chr7 | 140014885 | 140015496 |
|   | 7 | 140003480 | 140020334 | NM_183147    | chr7 | 140004447 | 140005045 |
|   | 6 | 139797851 | 139806563 | NM_011084    | chr6 | 139801117 | 139801890 |
| X |   | 139558371 | 139566888 | NM_026247    | chrX | 139562181 | 139562917 |
| X |   | 138634017 | 138646552 | NM_031258    | chrX | 138641637 | 138642265 |
| X |   | 138634017 | 138646552 | NM_031258    | chrX | 138637948 | 138638538 |
|   | 6 | 138543665 | 138552164 | NM_207222    | chr6 | 138546435 | 138547318 |
| X |   | 138097652 | 138106151 | BC031534     | chrX | 138102289 | 138103169 |
|   | 1 | 137861182 | 137871694 | L06234       | chr1 | 137870843 | 137871441 |
|   | 5 | 137713105 | 137721604 | NM_007942    | chr5 | 137714708 | 137715330 |
|   | 4 | 137700748 | 137709278 | NM_026689    | chr4 | 137705196 | 137705791 |
|   | 5 | 137573897 | 137582717 | NM_010144    | chr5 | 137581442 | 137582054 |
|   | 5 | 137534922 | 137550029 | NM_031405    | chr5 | 137536373 | 137536963 |
|   | 1 | 137530472 | 137538971 | AF092921     | chr1 | 137531013 | 137531686 |
|   | 5 | 137240713 | 137255006 | NM_021719    | chr5 | 137251362 | 137252246 |
|   | 5 | 137240713 | 137255006 | NM_021719    | chr5 | 137247046 | 137247747 |
|   | 7 | 137149830 | 137158788 | NM_010096    | chr7 | 137158284 | 137158724 |
|   | 7 | 137149830 | 137158788 | NM_010096    | chr7 | 137153887 | 137154501 |
| X |   | 136853994 | 136862493 | BC043317     | chrX | 136858926 | 136859529 |
|   | 1 | 136363594 | 136372093 | NM_183292    | chr1 | 136371087 | 136371691 |
|   | 1 | 136370606 | 136379105 | NM_152895    | chr1 | 136371087 | 136371691 |
|   | 1 | 136305071 | 136313580 | NM_145510    | chr1 | 136305666 | 136306474 |
|   | 4 | 136155690 | 136176879 | NM_007574    | chr4 | 136164173 | 136164820 |
| X |   | 136018392 | 136026891 | AF196480     | chrX | 136025746 | 136026346 |
| X |   | 136005320 | 136013819 | NM_011845    | chrX | 136010171 | 136011002 |
| X |   | 135886460 | 135895549 | NM_010286    | chrX | 135889897 | 135890252 |
| X |   | 135886460 | 135895549 | NM_010286    | chrX | 135887293 | 135887938 |
| X |   | 135796977 | 135805536 | NM_021463    | chrX | 135802574 | 135803422 |
|   | 3 | 135756878 | 135766171 | NM_026228    | chr3 | 135757243 | 135758055 |
|   | 4 | 135689600 | 135698105 | NM_008309    | chr4 | 135692278 | 135692685 |
|   | 4 | 135472500 | 135480999 | NM_001008232 | chr4 | 135480251 | 135480933 |
| X |   | 135403243 | 135411745 | NM_177921    | chrX | 135403304 | 135403912 |
| X |   | 135342416 | 135350915 | NM_153586    | chrX | 135342740 | 135343456 |
|   | 1 | 135185310 | 135193834 | NM_175443    | chr1 | 135191183 | 135191973 |
|   | 1 | 135185310 | 135193834 | NM_175443    | chr1 | 135190153 | 135191053 |

|   |   |           |           |              |      |           |           |
|---|---|-----------|-----------|--------------|------|-----------|-----------|
| X |   | 135141192 | 135157524 | NM_016675    | chrX | 135156075 | 135157278 |
| X |   | 135141192 | 135157524 | NM_016675    | chrX | 135154984 | 135155884 |
| X |   | 134950984 | 134959506 | NM_023270    | chrX | 134956311 | 134956922 |
| X |   | 134575254 | 134583753 | NM_175541    | chrX | 134581956 | 134583072 |
| X |   | 134575254 | 134583753 | NM_175541    | chrX | 134581161 | 134581757 |
| X |   | 134427566 | 134437581 | NM_177920    | chrX | 134429392 | 134430005 |
| X |   | 134254869 | 134263368 | NM_013724    | chrX | 134262722 | 134263327 |
|   | 1 | 134137684 | 134146207 | NM_028778    | chr1 | 134144947 | 134145537 |
|   | 1 | 133964652 | 133973230 | NM_008795    | chr1 | 133971784 | 133972401 |
|   | 1 | 133784513 | 133800654 | NM_145977    | chr1 | 133798232 | 133798927 |
|   | 4 | 133772876 | 133781375 | BC022922     | chr4 | 133779252 | 133779871 |
|   | 4 | 133663545 | 133677544 | NM_133880    | chr4 | 133674809 | 133675462 |
|   | 1 | 133349449 | 133358050 | NM_175382    | chr1 | 133352658 | 133353454 |
|   | 4 | 132942174 | 132958882 | NM_178698    | chr4 | 132949450 | 132950023 |
| X |   | 132911913 | 132920462 | NM_030688    | chrX | 132919200 | 132919936 |
|   | 1 | 132764327 | 132772826 | NM_001009940 | chr1 | 132764699 | 132765115 |
|   | 6 | 132741356 | 132749855 | NM_181276    | chr6 | 132748746 | 132749333 |
|   | 1 | 132648297 | 132664418 | NM_011082    | chr1 | 132652526 | 132653397 |
|   | 1 | 132553632 | 132570317 | NM_177604    | chr1 | 132567922 | 132568756 |
|   | 4 | 132478452 | 132495461 | NM_027152    | chr4 | 132482383 | 132483376 |
|   | 4 | 132481434 | 132490583 | NM_008154    | chr4 | 132482383 | 132483376 |
|   | 4 | 132396654 | 132405208 | NM_153423    | chr4 | 132403238 | 132403826 |
|   | 4 | 132396654 | 132405208 | NM_153423    | chr4 | 132399351 | 132399964 |
|   | 1 | 132287731 | 132296286 | NM_010016    | chr1 | 132290863 | 132291619 |
| X |   | 132212377 | 132220930 | NM_176971    | chrX | 132215585 | 132216243 |
| X |   | 132163140 | 132171699 | NM_011123    | chrX | 132165567 | 132166590 |
| X |   | 132105971 | 132114470 | BC065397     | chrX | 132111537 | 132112138 |
| X |   | 132105971 | 132114470 | BC065397     | chrX | 132110415 | 132111411 |
| X |   | 132078371 | 132093973 | NM_019768    | chrX | 132092503 | 132093382 |
|   | 4 | 132002059 | 132010622 | NM_201368    | chr4 | 132005551 | 132006186 |
|   | 8 | 131947224 | 131955723 | NM_029292    | chr8 | 131952680 | 131953266 |
|   | 8 | 131949064 | 131957607 | NM_029061    | chr8 | 131952680 | 131953266 |
| X |   | 131610691 | 131626368 | NM_009750    | chrX | 131611102 | 131611889 |
| X |   | 131585444 | 131594046 | NM_011712    | chrX | 131590914 | 131591745 |
|   | 5 | 131589013 | 131598225 | NM_145218    | chr5 | 131590167 | 131590938 |
|   | 4 | 131521429 | 131529928 | NM_020273    | chr4 | 131521483 | 131521901 |
| X |   | 131411975 | 131420474 | NM_009749    | chrX | 131419425 | 131420180 |
|   | 7 | 131328111 | 131354053 | NM_009774    | chr7 | 131349445 | 131350063 |
| X |   | 131334188 | 131342694 | NM_029823    | chrX | 131336839 | 131337525 |
|   | 3 | 131331580 | 131340090 | NM_028943    | chr3 | 131336028 | 131336618 |
| X |   | 131229266 | 131237765 | NM_198161    | chrX | 131235791 | 131236381 |
|   | 4 | 131194589 | 131203088 | BC017137     | chr4 | 131200484 | 131201097 |
| X |   | 131179420 | 131187931 | BC117923     | chrX | 131186526 | 131187122 |
| X |   | 131139201 | 131149276 | BC058970     | chrX | 131143883 | 131145188 |
| X |   | 131083056 | 131094382 | NM_026081    | chrX | 131089942 | 131090651 |
|   | 2 | 130863692 | 130884723 | NM_007682    | chr2 | 130869197 | 130869783 |
|   | 5 | 130727504 | 130736015 | NM_021371    | chr5 | 130732546 | 130733181 |



|   |           |           |              |           |           |           |           |
|---|-----------|-----------|--------------|-----------|-----------|-----------|-----------|
| X | 130713648 | 130722160 | NM_183320    | chrX      | 130721471 | 130722123 |           |
| X | 130713648 | 130722160 | NM_183320    | chrX      | 130714786 | 130715772 |           |
| X | 130554552 | 130563051 | NM_025355    | chrX      | 130555863 | 130556481 |           |
| X | 130521479 | 130529978 | BC115763     | chrX      | 130523465 | 130524227 |           |
|   | 7         | 130513897 | 130522396    | BC004057  | chr7      | 130517551 | 130518142 |
|   | 2         | 130353248 | 130361794    | NM_025922 | chr2      | 130359152 | 130359852 |
|   | 2         | 130353587 | 130362086    | NM_029832 | chr2      | 130359152 | 130359852 |
|   | 5         | 130285032 | 130293668    | NM_010368 | chr5      | 130285077 | 130285651 |
|   | 2         | 130261614 | 130270130    | NM_011025 | chr2      | 130263375 | 130264172 |
|   | 6         | 130194832 | 130209508    | NM_014194 | chr6      | 130204296 | 130204920 |
|   | 6         | 130194832 | 130209508    | NM_014194 | chr6      | 130201293 | 130202744 |
|   | 6         | 130194832 | 130209508    | NM_014194 | chr6      | 130198688 | 130199463 |
|   | 6         | 130194832 | 130209508    | NM_014194 | chr6      | 130195938 | 130196729 |
|   | 2         | 130135723 | 130144252    | BC050930  | chr2      | 130143792 | 130144216 |
| X | 130090772 | 130103776 | NM_001007578 | chrX      | 130094744 | 130095346 |           |
| X | 130090772 | 130103776 | NM_001007578 | chrX      | 130093661 | 130094658 |           |
|   | 6         | 130093029 | 130101591    | NM_053151 | chr6      | 130093250 | 130093863 |
| X | 130090772 | 130103776 | NM_001007578 | chrX      | 130091680 | 130092287 |           |
|   | 6         | 130028550 | 130038951    | NM_053153 | chr6      | 130035317 | 130036145 |
|   | 6         | 130028550 | 130038951    | NM_053153 | chr6      | 130034413 | 130035006 |
|   | 6         | 130028550 | 130038951    | NM_053153 | chr6      | 130029044 | 130029663 |
|   | 6         | 129990125 | 129998653    | NM_053154 | chr6      | 129997621 | 129998263 |
|   | 6         | 129990125 | 129998653    | NM_053154 | chr6      | 129996222 | 129996887 |
|   | 2         | 129981380 | 129989879    | NM_152993 | chr2      | 129981888 | 129982537 |
| X | 129926039 | 129934548 | NM_019865    | chrX      | 129931578 | 129932755 |           |
| X | 129926915 | 129935466 | NM_013482    | chrX      | 129931578 | 129932755 |           |
|   | 6         | 129839864 | 129848365    | NM_133203 | chr6      | 129839860 | 129840551 |
|   | 8         | 129829419 | 129837920    | BC099449  | chr8      | 129836390 | 129837214 |
|   | 5         | 129809939 | 129818479    | NM_172276 | chr5      | 129817455 | 129818118 |
|   | 3         | 129812014 | 129820527    | NM_009102 | chr3      | 129813072 | 129813968 |
|   | 4         | 129674575 | 129683426    | NM_023476 | chr4      | 129679496 | 129680093 |
|   | 6         | 129537586 | 129546478    | NM_153590 | chr6      | 129541191 | 129541736 |
|   | 6         | 129435957 | 129444465    | NM_020008 | chr6      | 129440929 | 129441539 |
|   | 10        | 129430577 | 129439076    | NM_146776 | chr10     | 129432522 | 129433131 |
| X | 129399563 | 129408198 | NM_133196    | chrX      | 129399982 | 129400733 |           |
|   | 6         | 129294975 | 129303474    | NM_199034 | chr6      | 129299127 | 129300010 |
| X | 129249046 | 129259442 | NM_026838    | chrX      | 129258830 | 129259406 |           |
|   | 2         | 129225544 | 129234043    | NM_177653 | chr2      | 129232453 | 129233293 |
|   | 2         | 129225544 | 129234043    | NM_177653 | chr2      | 129228937 | 129229546 |
|   | 10        | 129192064 | 129200563    | NM_146550 | chr10     | 129196462 | 129197043 |
|   | 3         | 129185940 | 129194464    | NM_011098 | chr3      | 129192227 | 129193148 |
| X | 129032000 | 129040499 | BC118529     | chrX      | 129032314 | 129032933 |           |
|   | 10        | 128784584 | 128793083    | NM_146729 | chr10     | 128788001 | 128788649 |
|   | 6         | 128751622 | 128760214    | NM_008527 | chr6      | 128753379 | 128753960 |
|   | 6         | 128622005 | 128630527    | NM_053165 | chr6      | 128628347 | 128629023 |
|   | 2         | 128549419 | 128557940    | NM_024237 | chr2      | 128556471 | 128557140 |
|   | 10        | 128073053 | 128085598    | NM_173733 | chr10     | 128079040 | 128079729 |

|    |           |           |              |       |           |           |
|----|-----------|-----------|--------------|-------|-----------|-----------|
| 7  | 128050831 | 128059334 | NM_133254    | chr7  | 128056578 | 128057182 |
| 7  | 128022505 | 128031763 | NM_146205    | chr7  | 128027390 | 128028452 |
| 7  | 127994986 | 128003514 | NM_009943    | chr7  | 127996808 | 127997578 |
| 10 | 127832387 | 127840886 | BC019415     | chr10 | 127838330 | 127838924 |
| 2  | 127811479 | 127821515 | NM_207680    | chr2  | 127815045 | 127815815 |
| 7  | 127789625 | 127798124 | AB231474     | chr7  | 127797032 | 127797780 |
| 7  | 127782328 | 127790895 | NM_023258    | chr7  | 127784928 | 127785536 |
| 3  | 127619167 | 127627666 | NM_009718    | chr3  | 127625199 | 127626052 |
| 1  | 127382569 | 127391202 | NM_028787    | chr1  | 127383856 | 127384468 |
| 6  | 126498473 | 126507056 | NM_145983    | chr6  | 126498603 | 126499236 |
| 7  | 126251722 | 126260252 | NM_007504    | chr7  | 126253211 | 126253809 |
| 7  | 126158123 | 126174559 | NM_023712    | chr7  | 126172919 | 126173564 |
| 8  | 126134333 | 126144903 | NM_020497    | chr8  | 126140747 | 126141455 |
| 8  | 126137767 | 126146438 | AY751521     | chr8  | 126140747 | 126141455 |
| 7  | 125989057 | 125997556 | NM_028816    | chr7  | 125993275 | 125993885 |
| 1  | 125870599 | 125879098 | NM_199021    | chr1  | 125871230 | 125871849 |
| 4  | 125758709 | 125767217 | NM_013718    | chr4  | 125764988 | 125765996 |
| 7  | 125635526 | 125644025 | BC030902     | chr7  | 125640793 | 125641466 |
| 7  | 125555751 | 125564250 | BC042743     | chr7  | 125555757 | 125556472 |
| 7  | 125349698 | 125359284 | M29854       | chr7  | 125352414 | 125353005 |
| 8  | 125326981 | 125335512 | NM_138656    | chr8  | 125330343 | 125330872 |
| 6  | 125276969 | 125285473 | NM_010736    | chr6  | 125279296 | 125280074 |
| 6  | 125276969 | 125285473 | NM_010736    | chr6  | 125276979 | 125277580 |
| 5  | 125148634 | 125157200 | NM_144819    | chr5  | 125154661 | 125155370 |
| 6  | 125040753 | 125049252 | BC117528     | chr6  | 125046668 | 125047285 |
| 6  | 124891095 | 124899594 | NM_145385    | chr6  | 124896896 | 124897508 |
| 6  | 124874759 | 124889550 | NM_008479    | chr6  | 124886054 | 124886749 |
| 6  | 124803395 | 124811894 | NM_013530    | chr6  | 124803688 | 124804147 |
| 8  | 124713120 | 124721659 | NM_145605    | chr8  | 124715700 | 124716510 |
| 6  | 124696175 | 124712906 | NM_013535    | chr6  | 124700807 | 124701396 |
| 6  | 124599205 | 124608563 | NM_173864    | chr6  | 124605410 | 124606115 |
| 5  | 124582707 | 124591254 | NM_028310    | chr5  | 124585301 | 124585965 |
| 5  | 124583246 | 124594438 | BC027168     | chr5  | 124585301 | 124585965 |
| 6  | 124504492 | 124513950 | NM_144938    | chr6  | 124509867 | 124510462 |
| 5  | 124228257 | 124236756 | NM_145070    | chr5  | 124228376 | 124228967 |
| 9  | 123321404 | 123330023 | NM_013860    | chr9  | 123327575 | 123328255 |
| 5  | 123269691 | 123278418 | NM_175423    | chr5  | 123276284 | 123276993 |
| 6  | 123189476 | 123197992 | NM_020001    | chr6  | 123192911 | 123193589 |
| 7  | 123158501 | 123167032 | NM_144529    | chr7  | 123161397 | 123162041 |
| 5  | 122962174 | 122970754 | NM_011026    | chr5  | 122969922 | 122970524 |
| 8  | 122872453 | 122880952 | NM_030209    | chr8  | 122874039 | 122874685 |
| 4  | 122842600 | 122851555 | NM_007558    | chr4  | 122849476 | 122850128 |
| 2  | 122467440 | 122478883 | NM_021507    | chr2  | 122473897 | 122474622 |
| 4  | 122460963 | 122469490 | NM_029662    | chr4  | 122462849 | 122463446 |
| 8  | 122442205 | 122450712 | NM_019709    | chr8  | 122444051 | 122445097 |
| 6  | 122416496 | 122425004 | BC096392     | chr6  | 122417829 | 122418409 |
| 8  | 122385176 | 122393675 | NM_001009950 | chr8  | 122387911 | 122388509 |

|    |           |           |              |       |           |           |
|----|-----------|-----------|--------------|-------|-----------|-----------|
| 6  | 122300117 | 122311257 | NM_007905    | chr6  | 122303425 | 122304024 |
| 6  | 121966417 | 121974916 | NM_008646    | chr6  | 121970333 | 121971032 |
| 1  | 121898823 | 121907326 | NM_019432    | chr1  | 121902771 | 121903589 |
| 2  | 121875131 | 121883630 | NM_026251    | chr2  | 121878255 | 121878828 |
| 10 | 121845559 | 121854137 | NM_016847    | chr10 | 121851203 | 121851821 |
| 9  | 121741162 | 121757669 | NM_021609    | chr9  | 121746265 | 121746857 |
| 9  | 121638562 | 121647082 | NM_029095    | chr9  | 121645046 | 121645846 |
| 2  | 121552411 | 121561070 | NM_177054    | chr2  | 121558685 | 121559332 |
| 3  | 121521247 | 121530361 | NM_145394    | chr3  | 121524648 | 121525243 |
| 3  | 121521247 | 121530361 | NM_145394    | chr3  | 121521855 | 121522850 |
| 5  | 121145700 | 121154230 | NM_011852    | chr5  | 121148463 | 121148990 |
| 11 | 120876823 | 120885659 | NM_026907    | chr11 | 120885038 | 120885634 |
| 6  | 120879940 | 120888453 | NM_007544    | chr6  | 120882717 | 120883062 |
| 7  | 120863177 | 120871679 | NM_030691    | chr7  | 120865301 | 120866453 |
| 11 | 120852998 | 120861508 | NM_009854    | chr11 | 120857351 | 120857954 |
| 11 | 120852998 | 120861508 | NM_009854    | chr11 | 120853951 | 120854704 |
| 7  | 120833015 | 120841514 | BC023188     | chr7  | 120833978 | 120834518 |
| 6  | 120795849 | 120804348 | NM_153516    | chr6  | 120798566 | 120799197 |
| 10 | 120780175 | 120788674 | BC059047     | chr10 | 120786336 | 120786830 |
| 14 | 120725125 | 120733624 | BC057692     | chr14 | 120726108 | 120726716 |
| 5  | 120686387 | 120695114 | NM_008499    | chr5  | 120690705 | 120691324 |
| 13 | 120525348 | 120533884 | NM_008710    | chr13 | 120528281 | 120528707 |
| 14 | 120378202 | 120386701 | BC096543     | chr14 | 120381745 | 120382380 |
| 11 | 120294746 | 120310508 | NM_013770    | chr11 | 120308708 | 120309566 |
| 4  | 120158198 | 120166735 | NM_019563    | chr4  | 120162951 | 120163629 |
| 7  | 120113819 | 120122332 | NM_177213    | chr7  | 120115649 | 120116255 |
| 8  | 119876927 | 119885430 | NM_026572    | chr8  | 119879853 | 119880485 |
| 2  | 119843433 | 119852016 | NM_133838    | chr2  | 119845866 | 119846468 |
| 9  | 119186174 | 119194738 | NM_010851    | chr9  | 119190968 | 119191577 |
| 9  | 119168609 | 119177108 | BC060645     | chr9  | 119170029 | 119170623 |
| 14 | 119155529 | 119164028 | BC119200     | chr14 | 119155738 | 119156329 |
| 2  | 119011265 | 119019773 | NM_019454    | chr2  | 119016462 | 119017080 |
| 2  | 118960163 | 118968670 | NM_145530    | chr2  | 118961529 | 118962285 |
| 2  | 118922846 | 118931641 | NM_016907    | chr2  | 118929552 | 118930151 |
| 9  | 118895476 | 118914645 | NM_011700    | chr9  | 118913693 | 118914280 |
| 9  | 118895476 | 118914645 | NM_011700    | chr9  | 118900417 | 118901091 |
| X  | 118511727 | 118520329 | NM_138742    | chrX  | 118514343 | 118514981 |
| 4  | 118412898 | 118421397 | NM_001011870 | chr4  | 118417351 | 118418091 |
| 14 | 118267483 | 118276021 | NM_015820    | chr14 | 118271575 | 118272426 |
| 11 | 118229385 | 118241176 | NM_029502    | chr11 | 118235206 | 118235892 |
| 11 | 118156091 | 118164624 | NM_021440    | chr11 | 118163565 | 118164350 |
| 4  | 118037733 | 118047660 | NM_172383    | chr4  | 118042871 | 118043561 |
| 4  | 117901269 | 117911310 | NM_020000    | chr4  | 117907498 | 117908092 |
| 6  | 117866407 | 117874934 | NM_133834    | chr6  | 117872931 | 117873636 |
| 14 | 117786107 | 117794616 | NM_023878    | chr14 | 117789841 | 117790709 |
| 11 | 117636014 | 117644513 | NM_027827    | chr11 | 117638768 | 117639291 |
| 4  | 117377251 | 117395935 | NM_026344    | chr4  | 117378856 | 117379447 |

|    |           |           |              |       |           |           |
|----|-----------|-----------|--------------|-------|-----------|-----------|
| 11 | 117141810 | 117150309 | NM_017380    | chr11 | 117147668 | 117148270 |
| 11 | 116925328 | 116933838 | NM_028777    | chr11 | 116930630 | 116931361 |
| 2  | 116806891 | 116815578 | NM_033524    | chr2  | 116813720 | 116814562 |
| 5  | 116705340 | 116713839 | BC024130     | chr5  | 116710150 | 116710745 |
| 4  | 116651565 | 116660064 | NM_009098    | chr4  | 116652447 | 116653152 |
| 6  | 116546151 | 116554650 | NM_146446    | chr6  | 116546083 | 116546792 |
| 4  | 116487280 | 116501285 | NM_175244    | chr4  | 116496097 | 116496714 |
| 4  | 116489131 | 116498307 | NM_009478    | chr4  | 116496097 | 116496714 |
| 11 | 116467198 | 116475697 | DQ390337     | chr11 | 116470743 | 116471341 |
| 11 | 116467899 | 116476403 | NM_030206    | chr11 | 116470743 | 116471341 |
| 10 | 116442820 | 116451980 | NM_146242    | chr10 | 116445380 | 116446021 |
| 11 | 116424072 | 116432571 | BC052182     | chr11 | 116426072 | 116426671 |
| 11 | 116394638 | 116403537 | NM_173755    | chr11 | 116394921 | 116395612 |
| 13 | 116208335 | 116217703 | NM_134058    | chr13 | 116213082 | 116213671 |
| 7  | 115987101 | 115995600 | BC084587     | chr7  | 115990661 | 115991198 |
| 11 | 115944608 | 115960896 | NM_178802    | chr11 | 115956820 | 115957810 |
| 6  | 115891545 | 115913057 | NM_145383    | chr6  | 115912217 | 115912892 |
| 5  | 115814514 | 115828761 | NM_172719    | chr5  | 115821789 | 115822637 |
| 5  | 115444621 | 115453120 | NM_013879    | chr5  | 115447270 | 115448088 |
| 11 | 115414241 | 115422740 | NM_025305    | chr11 | 115420636 | 115421274 |
| 11 | 115417497 | 115425996 | NM_173048    | chr11 | 115420636 | 115421274 |
| 11 | 115080834 | 115089333 | NM_010350    | chr11 | 115087612 | 115088359 |
| 5  | 115031991 | 115041982 | NM_019834    | chr5  | 115040964 | 115041723 |
| 10 | 114717202 | 114725701 | NM_024454    | chr10 | 114717995 | 114718632 |
| 5  | 114635606 | 114653956 | NM_054093    | chr5  | 114640116 | 114641107 |
| 5  | 114638971 | 114647485 | NM_026145    | chr5  | 114640116 | 114641107 |
| 5  | 114635606 | 114653956 | NM_054093    | chr5  | 114638854 | 114639590 |
| 5  | 114638971 | 114647485 | NM_026145    | chr5  | 114638854 | 114639590 |
| 8  | 114616284 | 114624783 | U28151       | chr8  | 114621604 | 114622222 |
| X  | 114595174 | 114603673 | NM_153109    | chrX  | 114597249 | 114597969 |
| 4  | 114421446 | 114429945 | NM_015758    | chr4  | 114428679 | 114429382 |
| 5  | 114385376 | 114395491 | NM_001040691 | chr5  | 114394050 | 114394656 |
| 5  | 114386676 | 114395175 | NM_175016    | chr5  | 114394050 | 114394656 |
| 5  | 114385376 | 114395491 | NM_001040691 | chr5  | 114391688 | 114392282 |
| 5  | 114386676 | 114395175 | NM_175016    | chr5  | 114391688 | 114392282 |
| 6  | 114242369 | 114250878 | NM_178703    | chr6  | 114244404 | 114244963 |
| 9  | 114172833 | 114181332 | NM_007535    | chr9  | 114176289 | 114176955 |
| 9  | 113773867 | 113782849 | NM_013699    | chr9  | 113777989 | 113778631 |
| 6  | 113682722 | 113691657 | NM_021488    | chr6  | 113682747 | 113683356 |
| 12 | 113502507 | 113512512 | BC059076     | chr12 | 113510112 | 113510719 |
| 2  | 113122575 | 113131074 | NM_010230    | chr2  | 113128147 | 113128954 |
| 7  | 113059813 | 113068312 | BC025973     | chr7  | 113063219 | 113063896 |
| 13 | 112927362 | 112935861 | NM_011945    | chr13 | 112927828 | 112928479 |
| 13 | 112606091 | 112616736 | NM_028487    | chr13 | 112613562 | 112614165 |
| 5  | 112489602 | 112498105 | NM_021351    | chr5  | 112496333 | 112497155 |
| 7  | 112159514 | 112168025 | BC031386     | chr7  | 112159777 | 112160413 |
| 12 | 112068898 | 112077397 | BC026445     | chr12 | 112074715 | 112075472 |

|   |    |           |           |           |       |           |           |
|---|----|-----------|-----------|-----------|-------|-----------|-----------|
|   | 12 | 112016344 | 112025278 | NM_021516 | chr12 | 112022603 | 112023249 |
|   | 2  | 111929155 | 111937654 | NM_146742 | chr2  | 111931107 | 111931761 |
|   | 12 | 111886752 | 111895269 | NM_009396 | chr12 | 111894415 | 111895020 |
|   | 2  | 111575152 | 111583651 | NM_146889 | chr2  | 111582028 | 111582620 |
|   | 2  | 111456292 | 111464791 | NM_146884 | chr2  | 111464163 | 111464756 |
|   | 10 | 111370888 | 111379387 | NM_178610 | chr10 | 111375441 | 111376045 |
|   | 12 | 111304242 | 111312741 | BC024365  | chr12 | 111312000 | 111312725 |
|   | 12 | 111304242 | 111312741 | BC024365  | chr12 | 111309134 | 111309764 |
|   | 9  | 111213636 | 111222135 | BC086653  | chr9  | 111220819 | 111221428 |
|   | 12 | 111179756 | 111188315 | NM_027149 | chr12 | 111183738 | 111184314 |
|   | 5  | 111047567 | 111056383 | NM_009469 | chr5  | 111049197 | 111049783 |
|   | 2  | 111027891 | 111038630 | NM_026248 | chr2  | 111035404 | 111036238 |
|   | 2  | 111027891 | 111038630 | NM_026248 | chr2  | 111030384 | 111030989 |
|   | 4  | 110925160 | 110933659 | BC051512  | chr4  | 110932392 | 110933021 |
|   | 11 | 110876254 | 110884753 | NM_008425 | chr11 | 110881608 | 110882397 |
|   | 9  | 110718990 | 110730078 | NM_146228 | chr9  | 110723944 | 110724531 |
|   | 9  | 110683322 | 110705282 | NM_146227 | chr9  | 110701675 | 110702506 |
| X |    | 110585464 | 110593963 | NM_172781 | chrX  | 110587714 | 110588414 |
|   | 5  | 110411003 | 110419697 | NM_008146 | chr5  | 110413626 | 110414168 |
|   | 3  | 110268782 | 110278067 | NM_030699 | chr3  | 110276177 | 110276843 |
|   | 11 | 110209212 | 110217848 | NM_011943 | chr11 | 110211669 | 110212260 |
|   | 10 | 110143575 | 110152077 | NM_178609 | chr10 | 110146050 | 110146776 |
|   | 11 | 110065319 | 110073818 | NM_147218 | chr11 | 110067481 | 110068115 |
|   | 12 | 110040711 | 110049210 | NM_184109 | chr12 | 110047564 | 110048168 |
|   | 2  | 109812678 | 109825277 | NM_026613 | chr2  | 109813561 | 109814198 |
|   | 2  | 109694992 | 109703491 | BC004685  | chr2  | 109695124 | 109695728 |
|   | 2  | 109518219 | 109526718 | BC034862  | chr2  | 109523894 | 109524752 |
|   | 11 | 109353844 | 109362343 | BC039629  | chr11 | 109361522 | 109362136 |
|   | 9  | 109350761 | 109359260 | NM_177703 | chr9  | 109350841 | 109351275 |
|   | 3  | 109245205 | 109253726 | NM_172685 | chr3  | 109247406 | 109247999 |
|   | 1  | 109244236 | 109252742 | NM_027548 | chr1  | 109245324 | 109246351 |
|   | 4  | 108971938 | 108980915 | NM_013876 | chr4  | 108971989 | 108972580 |
|   | 7  | 108958986 | 108967690 | NM_057173 | chr7  | 108964457 | 108965175 |
|   | 8  | 108710860 | 108719372 | NM_024445 | chr8  | 108716445 | 108717029 |
|   | 8  | 108713825 | 108722479 | NM_145824 | chr8  | 108716445 | 108717029 |
|   | 7  | 108634686 | 108643185 | NM_146725 | chr7  | 108641838 | 108642178 |
|   | 5  | 108622675 | 108631174 | NM_008806 | chr5  | 108628242 | 108629155 |
|   | 7  | 108614675 | 108623174 | NM_146726 | chr7  | 108622389 | 108622853 |
|   | 4  | 108492619 | 108501236 | NM_146150 | chr4  | 108498024 | 108498624 |
|   | 9  | 108422946 | 108442938 | NM_031392 | chr9  | 108435074 | 108435679 |
| X |    | 108422302 | 108430851 | NM_026565 | chrX  | 108428601 | 108429422 |
| X |    | 108422302 | 108430851 | NM_026565 | chrX  | 108427593 | 108428406 |
|   | 8  | 108401884 | 108410482 | NM_008289 | chr8  | 108407822 | 108408503 |
|   | 9  | 108360162 | 108377758 | NM_133794 | chr9  | 108370787 | 108371383 |
|   | 3  | 108308391 | 108317223 | NM_146137 | chr3  | 108315708 | 108316327 |
|   | 7  | 108207750 | 108216249 | NM_146738 | chr7  | 108213662 | 108214330 |
|   | 6  | 108172895 | 108181394 | NM_010585 | chr6  | 108176803 | 108177412 |

|    |           |           |              |       |           |           |
|----|-----------|-----------|--------------|-------|-----------|-----------|
| 8  | 108147859 | 108168075 | NM_030152    | chr8  | 108166223 | 108166814 |
| 9  | 108119338 | 108128025 | NM_010017    | chr9  | 108127341 | 108127872 |
| 9  | 108119338 | 108128025 | NM_010017    | chr9  | 108119837 | 108120746 |
| 8  | 108108328 | 108116933 | NM_145604    | chr8  | 108113599 | 108114192 |
| 1  | 107993551 | 108003322 | BC059254     | chr1  | 108000788 | 108001608 |
| 7  | 107913939 | 107922438 | NM_146499    | chr7  | 107915764 | 107916361 |
| 7  | 107687896 | 107696395 | NM_146774    | chr7  | 107688484 | 107689075 |
| 1  | 107602270 | 107610783 | NM_009399    | chr1  | 107606403 | 107607001 |
| 9  | 107561158 | 107574576 | NM_011349    | chr9  | 107565897 | 107566500 |
| 1  | 107485460 | 107493973 | NM_173187    | chr1  | 107491813 | 107492529 |
| 1  | 107488691 | 107497209 | NM_013784    | chr1  | 107491813 | 107492529 |
| 3  | 107458846 | 107467729 | BC120590     | chr3  | 107461360 | 107462071 |
| 9  | 107192741 | 107201328 | NM_175486    | chr9  | 107195460 | 107196063 |
| 9  | 107192855 | 107202396 | NM_133984    | chr9  | 107195460 | 107196063 |
| 2  | 107085493 | 107097901 | NM_021275    | chr2  | 107090138 | 107090766 |
| 7  | 106952167 | 106960666 | NM_001002894 | chr7  | 106956466 | 106957075 |
| 13 | 106558148 | 106567070 | NM_008308    | chr13 | 106561692 | 106562277 |
| 7  | 106544536 | 106553035 | NM_146602    | chr7  | 106545505 | 106546113 |
| 4  | 106522791 | 106531290 | BC028324     | chr4  | 106524970 | 106525571 |
| 13 | 106410897 | 106420867 | NM_027934    | chr13 | 106415053 | 106415521 |
| 11 | 106380701 | 106389200 | BC057406     | chr11 | 106383999 | 106384654 |
| 9  | 106329410 | 106337926 | NM_145620    | chr9  | 106331163 | 106331764 |
| 9  | 106331762 | 106340752 | NM_145619    | chr9  | 106331163 | 106331764 |
| 7  | 106232223 | 106240722 | NM_001001318 | chr7  | 106239513 | 106240128 |
| 9  | 106103458 | 106111957 | NM_020559    | chr9  | 106108566 | 106109334 |
| 12 | 105958222 | 105966721 | NM_009747    | chr12 | 105964823 | 105965533 |
| 11 | 105866311 | 105874810 | BC027095     | chr11 | 105868829 | 105869413 |
| 11 | 105846962 | 105855545 | NM_027946    | chr11 | 105853530 | 105854141 |
| 8  | 105607139 | 105615638 | D21253       | chr8  | 105613200 | 105613788 |
| 3  | 105574386 | 105582885 | NM_001039347 | chr3  | 105582523 | 105583199 |
| 7  | 105504777 | 105522297 | NM_018880    | chr7  | 105515148 | 105515863 |
| 7  | 105508269 | 105516860 | NM_019502    | chr7  | 105515148 | 105515863 |
| 13 | 105346705 | 105355225 | NM_172807    | chr13 | 105354400 | 105354896 |
| 3  | 105178703 | 105187202 | NM_030249    | chr3  | 105187019 | 105187561 |
| 3  | 105164547 | 105173046 | BC003236     | chr3  | 105170191 | 105170735 |
| X  | 104642984 | 104651483 | BC099952     | chrX  | 104648442 | 104649234 |
| 7  | 104538525 | 104555038 | NM_147050    | chr7  | 104541472 | 104542225 |
| 7  | 104518627 | 104527126 | NM_147049    | chr7  | 104519394 | 104519993 |
| 7  | 104447445 | 104464039 | NM_146379    | chr7  | 104462426 | 104463045 |
| 7  | 104447445 | 104464039 | NM_146379    | chr7  | 104459519 | 104460295 |
| 7  | 104420705 | 104429204 | NM_146813    | chr7  | 104423386 | 104424005 |
| 5  | 104351489 | 104360035 | NM_010097    | chr5  | 104355647 | 104356416 |
| 12 | 104166598 | 104182994 | NM_009246    | chr12 | 104175060 | 104175699 |
| 5  | 104149032 | 104157531 | NM_178741    | chr5  | 104152833 | 104153398 |
| 14 | 104138433 | 104147076 | NM_029561    | chr14 | 104140994 | 104141587 |
| 7  | 104036138 | 104044637 | NM_172905    | chr7  | 104041298 | 104041905 |
| 9  | 103982779 | 103991278 | NM_145700    | chr9  | 103984770 | 103985440 |

|   |    |           |           |              |       |           |           |
|---|----|-----------|-----------|--------------|-------|-----------|-----------|
|   | 9  | 103916048 | 103924583 | NM_175324    | chr9  | 103919232 | 103920107 |
|   | 9  | 103918840 | 103927466 | NM_025692    | chr9  | 103919232 | 103920107 |
| X |    | 103875682 | 103884181 | NM_181319    | chrX  | 103882087 | 103883103 |
| X |    | 103864683 | 103873182 | NM_145224    | chrX  | 103869741 | 103870909 |
| X |    | 103864683 | 103873182 | NM_145224    | chrX  | 103868654 | 103869273 |
| X |    | 103864683 | 103873182 | NM_145224    | chrX  | 103864833 | 103865492 |
|   | 13 | 103807940 | 103816469 | NM_008533    | chr13 | 103813789 | 103814394 |
|   | 5  | 103784079 | 103792578 | D28529       | chr5  | 103788036 | 103788965 |
|   | 7  | 103714459 | 103722983 | NM_008219    | chr7  | 103715793 | 103716535 |
|   | 11 | 103563375 | 103571911 | NM_011719    | chr11 | 103565054 | 103565640 |
|   | 7  | 103418189 | 103426688 | NM_147100    | chr7  | 103421917 | 103422504 |
| X |    | 103285211 | 103294558 | NM_172435    | chrX  | 103291931 | 103293048 |
|   | 12 | 103276829 | 103285456 | NM_172806    | chr12 | 103283380 | 103283988 |
|   | 5  | 103276493 | 103284992 | AB005665     | chr5  | 103278612 | 103279245 |
|   | 9  | 103221189 | 103229823 | NM_175565    | chr9  | 103228056 | 103228880 |
|   | 3  | 103181290 | 103189933 | NM_010937    | chr3  | 103188727 | 103189346 |
|   | 12 | 103156302 | 103165722 | NM_022323    | chr12 | 103165153 | 103165511 |
|   | 11 | 103158293 | 103166792 | NM_133715    | chr11 | 103158352 | 103158849 |
|   | 3  | 103143671 | 103160381 | NM_144901    | chr3  | 103150564 | 103151156 |
|   | 3  | 103143671 | 103160381 | NM_144901    | chr3  | 103149646 | 103150434 |
| X |    | 103117354 | 103125874 | NM_175271    | chrX  | 103123504 | 103124184 |
|   | 3  | 103062646 | 103071145 | NM_011516    | chr3  | 103067234 | 103067870 |
|   | 7  | 103044957 | 103053456 | NM_001011847 | chr7  | 103046495 | 103047096 |
| X |    | 103040863 | 103049362 | NM_199468    | chrX  | 103041524 | 103042889 |
|   | 14 | 102726859 | 102736081 | NM_007904    | chr14 | 102728462 | 102729115 |
|   | 5  | 102715693 | 102724354 | NM_029270    | chr5  | 102722413 | 102723019 |
|   | 14 | 102393020 | 102401599 | NM_022886    | chr14 | 102398175 | 102398854 |
| X |    | 102383843 | 102392342 | NM_008828    | chrX  | 102391356 | 102392329 |
| X |    | 102383843 | 102392342 | NM_008828    | chrX  | 102390396 | 102391038 |
|   | 3  | 102209571 | 102218102 | NM_009814    | chr3  | 102211422 | 102212072 |
|   | 2  | 102198655 | 102207739 | NM_020267    | chr2  | 102199811 | 102200400 |
|   | 15 | 102148150 | 102162271 | NM_021713    | chr15 | 102159967 | 102160516 |
|   | 7  | 101969564 | 101982578 | NM_009710    | chr7  | 101979218 | 101979692 |
|   | 7  | 101971363 | 101982668 | NM_007491    | chr7  | 101979218 | 101979692 |
|   | 13 | 101922718 | 101939684 | NM_022885    | chr13 | 101932511 | 101933127 |
| X |    | 101696491 | 101704990 | NM_173436    | chrX  | 101703338 | 101703981 |
|   | 2  | 101681101 | 101689600 | NM_029635    | chr2  | 101683778 | 101684397 |
|   | 15 | 101519840 | 101528339 | NM_008476    | chr15 | 101522589 | 101523305 |
|   | 3  | 101500186 | 101509876 | NM_207205    | chr3  | 101508044 | 101509383 |
|   | 12 | 101443423 | 101451922 | BC044817     | chr12 | 101448097 | 101448690 |
| X |    | 101317115 | 101325614 | NM_053201    | chrX  | 101321601 | 101322191 |
|   | 4  | 101209371 | 101218312 | NM_010704    | chr4  | 101213239 | 101213843 |
|   | 15 | 101195660 | 101204198 | BC120601     | chr15 | 101194722 | 101195733 |
|   | 12 | 101174156 | 101189691 | NM_145448    | chr12 | 101179420 | 101180034 |
| X |    | 101057376 | 101065875 | NM_053206    | chrX  | 101059349 | 101059966 |
| X |    | 101057376 | 101065875 | NM_053206    | chrX  | 101058131 | 101058716 |
|   | 15 | 100937789 | 100946288 | NM_144790    | chr15 | 100940861 | 100941546 |

|   |    |           |           |              |       |           |           |
|---|----|-----------|-----------|--------------|-------|-----------|-----------|
| X |    | 100871023 | 100879522 | NM_175358    | chrX  | 100872044 | 100872776 |
|   | 11 | 100636108 | 100644607 | NM_011489    | chr11 | 100642025 | 100642897 |
|   | 14 | 100534156 | 100542698 | AB033370     | chr14 | 100538607 | 100539241 |
|   | 12 | 100507380 | 100515879 | NM_008947    | chr12 | 100512897 | 100513565 |
|   | 6  | 100250322 | 100258904 | NM_019743    | chr6  | 100254044 | 100254744 |
| X |    | 100181468 | 100190003 | NM_011276    | chrX  | 100189344 | 100189971 |
| X |    | 100181468 | 100190003 | NM_011276    | chrX  | 100182341 | 100183365 |
| X |    | 100160948 | 100175393 | AF197105     | chrX  | 100161814 | 100162618 |
|   | 11 | 100006837 | 100015336 | NM_201255    | chr11 | 100009194 | 100009810 |
|   | 11 | 99864142  | 99872641  | NM_010659    | chr11 | 99864204  | 99864921  |
|   | 11 | 99855123  | 99863644  | NM_027563    | chr11 | 99855617  | 99856225  |
| X |    | 99726299  | 99734798  | NM_001045541 | chrX  | 99732284  | 99732882  |
| X |    | 99726299  | 99734798  | NM_001045541 | chrX  | 99728792  | 99729434  |
| X |    | 99726299  | 99734798  | NM_001045541 | chrX  | 99727570  | 99728517  |
|   | 11 | 99665196  | 99673695  | NM_001013823 | chr11 | 99671776  | 99672363  |
| X |    | 99611186  | 99619700  | NM_009440    | chrX  | 99611355  | 99611872  |
|   | 7  | 99582924  | 99591423  | NM_175316    | chr7  | 99586779  | 99587437  |
| X |    | 99553222  | 99561774  | NM_009767    | chrX  | 99556200  | 99556867  |
| X |    | 99518117  | 99526628  | NM_007674    | chrX  | 99524939  | 99525667  |
|   | 1  | 99489872  | 99498382  | NM_133825    | chr1  | 99490189  | 99490805  |
|   | 11 | 99394607  | 99457174  | NM_001039502 | chr11 | 99452099  | 99452798  |
|   | 10 | 99439512  | 99448139  | NM_013598    | chr10 | 99444157  | 99444788  |
|   | 10 | 99439512  | 99448139  | NM_013598    | chr10 | 99439661  | 99440327  |
|   | 15 | 99423434  | 99431933  | NM_175087    | chr15 | 99424349  | 99424957  |
|   | 11 | 99356749  | 99378943  | NM_001039666 | chr11 | 99372528  | 99373176  |
|   | 11 | 99356749  | 99378943  | NM_001039666 | chr11 | 99366572  | 99367183  |
|   | 12 | 99315639  | 99324161  | NM_198311    | chr12 | 99317057  | 99317703  |
|   | 7  | 99306393  | 99314892  | BC026428     | chr7  | 99309636  | 99310239  |
|   | 6  | 99229465  | 99237978  | NM_053202    | chr6  | 99235069  | 99235717  |
|   | 11 | 99202955  | 99211454  | NM_010660    | chr11 | 99204561  | 99205178  |
|   | 12 | 99132364  | 99144455  | NM_011877    | chr12 | 99133051  | 99133683  |
| X |    | 99108907  | 99117406  | NM_027591    | chrX  | 99110623  | 99111221  |
|   | 5  | 99088741  | 99097627  | NM_173404    | chr5  | 99089000  | 99089534  |
| X |    | 98999682  | 99009451  | BC116811     | chrX  | 99004327  | 99005119  |
| X |    | 98999682  | 99009451  | BC116811     | chrX  | 99000840  | 99001987  |
|   | 3  | 98984756  | 98994855  | NM_008293    | chr3  | 98985672  | 98986296  |
| X |    | 98904623  | 98916395  | NM_001039116 | chrX  | 98914910  | 98915660  |
|   | 1  | 98825467  | 98839189  | NM_001039475 | chr1  | 98828394  | 98829174  |
| X |    | 98705339  | 98713867  | NM_027382    | chrX  | 98706608  | 98707356  |
|   | 8  | 98631581  | 98641324  | BC018281     | chr8  | 98635273  | 98636173  |
|   | 11 | 98605606  | 98628423  | NM_138660    | chr11 | 98609012  | 98609616  |
|   | 10 | 98553510  | 98562009  | BC119390     | chr10 | 98558754  | 98559640  |
|   | 4  | 98516973  | 98525505  | NM_013913    | chr4  | 98518209  | 98518954  |
|   | 4  | 98484480  | 98492979  | BC006868     | chr4  | 98492310  | 98492925  |
| X |    | 98388592  | 98397091  | NM_009094    | chrX  | 98391255  | 98391844  |
|   | 15 | 98359520  | 98368272  | NM_133714    | chr15 | 98361641  | 98362272  |
| X |    | 98316184  | 98324683  | NM_027181    | chrX  | 98322481  | 98323072  |



|   |    |          |          |           |       |          |          |
|---|----|----------|----------|-----------|-------|----------|----------|
| X |    | 98316184 | 98324683 | NM_027181 | chrX  | 98317029 | 98317627 |
|   | 11 | 98256924 | 98265680 | NM_010346 | chr11 | 98264870 | 98265647 |
|   | 8  | 98193215 | 98202861 | NM_145601 | chr8  | 98201682 | 98202282 |
|   | 8  | 98194644 | 98203241 | NM_199455 | chr8  | 98201682 | 98202282 |
|   | 15 | 98082814 | 98091336 | NM_027304 | chr15 | 98088846 | 98089434 |
|   | 4  | 98032652 | 98041490 | NM_007704 | chr4  | 98035898 | 98036532 |
|   | 16 | 97952217 | 97960717 | BC046433  | chr16 | 97958509 | 97958987 |
|   | 15 | 97912669 | 97927344 | NM_144851 | chr15 | 97923188 | 97923832 |
|   | 8  | 97860238 | 97876231 | NM_018882 | chr8  | 97869237 | 97869849 |
|   | 13 | 97769048 | 97777547 | NM_008255 | chr13 | 97769977 | 97770584 |
|   | 15 | 97733799 | 97742330 | NM_009504 | chr15 | 97741417 | 97742195 |
|   | 8  | 97693582 | 97702097 | NM_011332 | chr8  | 97699759 | 97700488 |
|   | 3  | 97693096 | 97701608 | NM_026539 | chr3  | 97694941 | 97695927 |
| X |    | 97626405 | 97642425 | NM_023144 | chrX  | 97632892 | 97633541 |
|   | 7  | 97610694 | 97619439 | NM_175105 | chr7  | 97613291 | 97613949 |
|   | 15 | 97606399 | 97614952 | NM_026353 | chr15 | 97606500 | 97607100 |
|   | 8  | 97582863 | 97591371 | NM_026385 | chr8  | 97585147 | 97585592 |
| X |    | 97495929 | 97504428 | NM_172932 | chrX  | 97503717 | 97504408 |
|   | 1  | 97495478 | 97504000 | NM_009183 | chr1  | 97502510 | 97503168 |
|   | 1  | 97495478 | 97504000 | NM_009183 | chr1  | 97501200 | 97501714 |
| X |    | 97495929 | 97504428 | NM_172932 | chrX  | 97500882 | 97501895 |
|   | 8  | 97485084 | 97493957 | NM_026274 | chr8  | 97485459 | 97486091 |
|   | 11 | 97443307 | 97451806 | NM_175332 | chr11 | 97443486 | 97444068 |
|   | 3  | 97290285 | 97298784 | BC019641  | chr3  | 97293548 | 97294148 |
|   | 6  | 97274984 | 97283483 | BC058262  | chr6  | 97276875 | 97277520 |
|   | 11 | 97260250 | 97268749 | NM_021493 | chr11 | 97263746 | 97264523 |
|   | 11 | 96823659 | 96832158 | NM_031183 | chr11 | 96831717 | 96832140 |
| X |    | 96822456 | 96831361 | NM_008446 | chrX  | 96826063 | 96827169 |
| X |    | 96826127 | 96834657 | NM_028303 | chrX  | 96826063 | 96827169 |
| X |    | 96691064 | 96699563 | NM_008784 | chrX  | 96697052 | 96697915 |
|   | 3  | 96637362 | 96646094 | NM_023719 | chr3  | 96644459 | 96645485 |
|   | 3  | 96637362 | 96646094 | NM_023719 | chr3  | 96639058 | 96639638 |
|   | 13 | 96542972 | 96551471 | NM_198408 | chr13 | 96543398 | 96544115 |
|   | 15 | 96467748 | 96476947 | BC066815  | chr15 | 96473031 | 96473708 |
|   | 13 | 96463047 | 96471546 | BC027286  | chr13 | 96467568 | 96467941 |
|   | 13 | 96463047 | 96471546 | BC027286  | chr13 | 96463083 | 96463693 |
|   | 3  | 95973401 | 95981900 | NM_146104 | chr3  | 95981265 | 95981961 |
|   | 3  | 95974854 | 95983353 | NM_153513 | chr3  | 95981265 | 95981961 |
|   | 3  | 95973401 | 95981900 | NM_146104 | chr3  | 95976874 | 95977719 |
|   | 3  | 95974854 | 95983353 | NM_153513 | chr3  | 95976874 | 95977719 |
|   | 13 | 95970326 | 95978825 | NM_011021 | chr13 | 95973921 | 95974622 |
|   | 11 | 95878658 | 95887454 | NM_172300 | chr11 | 95879685 | 95880316 |
|   | 16 | 95805284 | 95813843 | NM_011809 | chr16 | 95811855 | 95812482 |
|   | 4  | 95561128 | 95575558 | NM_145548 | chr4  | 95569974 | 95570583 |
|   | 15 | 95480306 | 95488805 | NM_207533 | chr15 | 95482786 | 95483247 |
|   | 3  | 95361249 | 95371021 | NM_133858 | chr3  | 95369284 | 95369930 |
|   | 3  | 95364710 | 95373480 | NM_173347 | chr3  | 95369284 | 95369930 |

|   |    |          |                       |       |          |          |
|---|----|----------|-----------------------|-------|----------|----------|
|   | 1  | 95270141 | 95278656 BC035301     | chr1  | 95271842 | 95272428 |
|   | 11 | 95195012 | 95203530 NM_016752    | chr11 | 95195595 | 95196189 |
|   | 11 | 95147108 | 95155635 NM_172543    | chr11 | 95154662 | 95155447 |
| X |    | 95091001 | 95099704 NM_052976    | chrX  | 95097516 | 95098203 |
| X |    | 95091001 | 95099704 NM_052976    | chrX  | 95093599 | 95094481 |
| X |    | 95091001 | 95099704 NM_052976    | chrX  | 95091986 | 95092723 |
|   | 11 | 94882789 | 94898891 NM_013565    | chr11 | 94885236 | 94886231 |
|   | 11 | 94854906 | 94863415 NM_133667    | chr11 | 94855911 | 94856509 |
|   | 9  | 94473270 | 94481769 NM_177909    | chr9  | 94481276 | 94481716 |
|   | 15 | 94451365 | 94459929 NM_178789    | chr15 | 94457841 | 94458571 |
|   | 3  | 94452190 | 94465408 NM_011281    | chr3  | 94456947 | 94457722 |
|   | 3  | 94421503 | 94430020 NM_025416    | chr3  | 94428486 | 94429103 |
|   | 1  | 94319660 | 94328159 NM_001011525 | chr1  | 94325656 | 94326405 |
| X |    | 93577370 | 93585891 NM_175540    | chrX  | 93581105 | 93582170 |
| X |    | 93577370 | 93585891 NM_175540    | chrX  | 93578581 | 93579495 |
|   | 5  | 93328979 | 93337478 NM_011148    | chr5  | 93330806 | 93331640 |
|   | 8  | 93235584 | 93244637 NM_172913    | chr8  | 93240198 | 93240778 |
|   | 3  | 93012382 | 93020888 NM_025501    | chr3  | 93018606 | 93019518 |
|   | 2  | 92982423 | 92994389 NM_001025246 | chr2  | 92983901 | 92984503 |
|   | 3  | 92861803 | 92870302 NM_029667    | chr3  | 92862701 | 92863350 |
|   | 7  | 92744489 | 92753011 NM_028243    | chr7  | 92748386 | 92749361 |
|   | 7  | 92746898 | 92755397 BC066148     | chr7  | 92748386 | 92749361 |
|   | 3  | 92655684 | 92665118 NM_008412    | chr3  | 92656743 | 92657612 |
|   | 16 | 92583688 | 92592187 NM_009821    | chr16 | 92588288 | 92589036 |
|   | 3  | 92583397 | 92591896 NM_173070    | chr3  | 92586278 | 92586879 |
| X |    | 92493634 | 92502157 NM_177789    | chrX  | 92496079 | 92496732 |
|   | 3  | 92431546 | 92440045 NM_011471    | chr3  | 92435412 | 92436025 |
|   | 3  | 92396108 | 92405188 NM_011469    | chr3  | 92401385 | 92402092 |
|   | 16 | 92380993 | 92389505 NM_172469    | chr16 | 92387921 | 92388687 |
| X |    | 92292764 | 92301281 NM_010833    | chrX  | 92298811 | 92299400 |
| X |    | 92292764 | 92301281 NM_010833    | chrX  | 92297556 | 92298150 |
| X |    | 92292764 | 92301281 NM_010833    | chrX  | 92294368 | 92295167 |
|   | 2  | 92257559 | 92267357 NM_211358    | chr2  | 92260138 | 92260742 |
|   | 16 | 92245775 | 92254327 NM_008424    | chr16 | 92250797 | 92251400 |
|   | 5  | 92208799 | 92217487 NM_009704    | chr5  | 92210677 | 92211417 |
|   | 2  | 92169229 | 92177872 NM_172670    | chr2  | 92171217 | 92171863 |
|   | 2  | 92170337 | 92186256 NM_145122    | chr2  | 92171217 | 92171863 |
| X |    | 91858628 | 91867151 NM_001003916 | chrX  | 91861860 | 91862578 |
|   | 5  | 91855303 | 91872240 NM_011339    | chr5  | 91861444 | 91862031 |
| X |    | 91858628 | 91867151 NM_001003916 | chrX  | 91860212 | 91861075 |
|   | 8  | 91531451 | 91543945 NM_145857    | chr8  | 91538301 | 91539043 |
| X |    | 91366706 | 91375205 NM_001033329 | chrX  | 91369382 | 91370219 |
| X |    | 91366706 | 91375205 NM_001033329 | chrX  | 91368458 | 91369106 |
| X |    | 91366706 | 91375205 NM_001033329 | chrX  | 91366827 | 91367709 |
|   | 16 | 91266730 | 91275232 BC071225     | chr16 | 91272551 | 91273604 |
| X |    | 91226857 | 91235401 NM_178753    | chrX  | 91227925 | 91228531 |
|   | 16 | 90913647 | 90922146 BC027145     | chr16 | 90917174 | 90917757 |

|   |    |          |                    |       |          |          |
|---|----|----------|--------------------|-------|----------|----------|
|   | 4  | 90889503 | 90898002 NM_207685 | chr4  | 90890338 | 90890934 |
|   | 3  | 90779016 | 90787618 NM_009114 | chr3  | 90779035 | 90779709 |
|   | 3  | 90680142 | 90702168 NM_011313 | chr3  | 90686235 | 90686840 |
|   | 3  | 90617300 | 90630434 NM_026416 | chr3  | 90628615 | 90629179 |
| X |    | 90613873 | 90622501 NM_026673 | chrX  | 90618295 | 90618913 |
| X |    | 90615953 | 90625496 BC115707  | chrX  | 90618295 | 90618913 |
| X |    | 90440113 | 90448612 BC006682  | chrX  | 90441385 | 90441987 |
|   | 3  | 90082073 | 90090624 NM_011826 | chr3  | 90087021 | 90087604 |
|   | 2  | 90064768 | 90073267 NM_146793 | chr2  | 90069597 | 90070200 |
|   | 2  | 90020835 | 90029335 NM_146265 | chr2  | 90027212 | 90027930 |
|   | 1  | 89920249 | 89940532 NM_201642 | chr1  | 89927516 | 89928011 |
|   | 3  | 89911297 | 89919824 NM_172530 | chr3  | 89917252 | 89917839 |
| X |    | 89882352 | 89890874 NM_008892 | chrX  | 89882688 | 89883592 |
|   | 2  | 89809730 | 89818229 NM_146794 | chr2  | 89815504 | 89816166 |
|   | 1  | 89649811 | 89658310 BC033599  | chr1  | 89649981 | 89650599 |
|   | 5  | 89556536 | 89565123 NM_017468 | chr5  | 89561585 | 89562191 |
| X |    | 89533241 | 89541864 NM_007492 | chrX  | 89538504 | 89539357 |
| X |    | 89533241 | 89541864 NM_007492 | chrX  | 89535397 | 89536309 |
|   | 9  | 89533869 | 89542368 NM_207260 | chr9  | 89534733 | 89535336 |
|   | 2  | 89238617 | 89247116 NM_146808 | chr2  | 89242529 | 89243151 |
|   | 15 | 89177539 | 89186046 NM_025795 | chr15 | 89182509 | 89183101 |
|   | 15 | 89180752 | 89189384 NM_178919 | chr15 | 89182509 | 89183101 |
|   | 2  | 89048115 | 89056614 NM_146971 | chr2  | 89053358 | 89053984 |
|   | 5  | 89048012 | 89056511 NM_027631 | chr5  | 89048371 | 89049243 |
|   | 3  | 89033710 | 89042209 NM_022994 | chr3  | 89036731 | 89037356 |
|   | 9  | 88991102 | 88999688 NM_007534 | chr9  | 88996940 | 88997596 |
|   | 15 | 88986051 | 89000814 BC007481  | chr15 | 88992395 | 88992983 |
|   | 15 | 88986051 | 89000814 BC007481  | chr15 | 88988636 | 88989338 |
|   | 1  | 88983697 | 88993527 NM_021306 | chr1  | 88986266 | 88986855 |
|   | 5  | 88876685 | 88886955 NM_009973 | chr5  | 88881319 | 88881937 |
|   | 5  | 88843128 | 88851627 NM_007785 | chr5  | 88845235 | 88845908 |
|   | 3  | 88796791 | 88805343 NM_009069 | chr3  | 88802877 | 88803576 |
|   | 15 | 88779326 | 88788176 NM_172818 | chr15 | 88784495 | 88785096 |
|   | 16 | 88755770 | 88779948 NM_130870 | chr16 | 88763320 | 88764213 |
|   | 8  | 88725107 | 88733606 NM_199446 | chr8  | 88725773 | 88726400 |
|   | 5  | 88558860 | 88571420 NM_053184 | chr5  | 88564780 | 88565425 |
|   | 16 | 88449495 | 88457994 NM_018778 | chr16 | 88453504 | 88454218 |
|   | 16 | 88393338 | 88401837 NM_181490 | chr16 | 88394530 | 88395163 |
|   | 1  | 88128415 | 88137172 NM_145222 | chr1  | 88131812 | 88132720 |
|   | 1  | 88128415 | 88137172 NM_145222 | chr1  | 88129999 | 88130621 |
| X |    | 88033196 | 88041737 BC116773  | chrX  | 88035126 | 88035755 |
|   | 2  | 88023370 | 88031869 NM_146532 | chr2  | 88025214 | 88026011 |
|   | 3  | 87999471 | 88010167 NM_026591 | chr3  | 88009023 | 88009617 |
|   | 6  | 87944624 | 87953123 NM_198622 | chr6  | 87945234 | 87946096 |
|   | 2  | 87892274 | 87908824 NM_146641 | chr2  | 87902114 | 87902741 |
|   | 5  | 87889836 | 87899679 BC048817  | chr5  | 87891931 | 87892548 |
|   | 8  | 87874708 | 87883253 NM_133255 | chr8  | 87879025 | 87879791 |

|    |          |          |              |       |          |          |
|----|----------|----------|--------------|-------|----------|----------|
| 12 | 87830514 | 87839013 | NM_173735    | chr12 | 87834265 | 87834918 |
| 12 | 87770855 | 87779914 | NM_145836    | chr12 | 87775608 | 87776252 |
| 8  | 87719847 | 87750654 | NM_009010    | chr8  | 87736722 | 87737392 |
| 11 | 87703590 | 87716117 | NM_146413    | chr11 | 87714503 | 87715074 |
| 11 | 87586326 | 87595787 | NM_172449    | chr11 | 87592028 | 87592998 |
| 16 | 87582145 | 87590649 | NM_007520    | chr16 | 87590291 | 87591097 |
| 12 | 87561803 | 87571802 | NM_177354    | chr12 | 87568642 | 87569353 |
| 2  | 87541000 | 87549499 | NM_146642    | chr2  | 87545539 | 87546182 |
| 9  | 87526639 | 87535206 | NM_023814    | chr9  | 87526872 | 87527840 |
| 2  | 87444461 | 87452960 | NM_146351    | chr2  | 87447258 | 87447939 |
| 3  | 87437855 | 87446401 | NM_009690    | chr3  | 87441949 | 87442540 |
| 11 | 87402412 | 87410913 | NM_133215    | chr11 | 87405627 | 87406214 |
| 10 | 87390470 | 87398969 | M30774       | chr10 | 87392091 | 87392699 |
| 6  | 87352070 | 87360569 | NM_026860    | chr6  | 87352589 | 87353236 |
| 5  | 87244805 | 87253304 | NM_172712    | chr5  | 87247795 | 87248513 |
| 2  | 87046778 | 87055277 | NM_146297    | chr2  | 87054322 | 87054854 |
| 11 | 86785705 | 86794204 | AB098741     | chr11 | 86787903 | 86788516 |
| 2  | 86757796 | 86766295 | NM_146768    | chr2  | 86759709 | 86760302 |
| 6  | 86587808 | 86596307 | DQ841260     | chr6  | 86589942 | 86590614 |
| 6  | 86587808 | 86596307 | DQ841260     | chr6  | 86588186 | 86588950 |
| 9  | 86322295 | 86330794 | BC043710     | chr9  | 86322838 | 86323443 |
| 2  | 86282080 | 86290579 | NM_146405    | chr2  | 86287652 | 86288252 |
| 7  | 86268758 | 86277257 | NM_146619    | chr7  | 86272680 | 86273625 |
| 2  | 86244320 | 86252819 | NM_146408    | chr2  | 86247785 | 86248386 |
| 7  | 86237597 | 86246096 | NM_146616    | chr7  | 86238888 | 86239474 |
| 7  | 86209656 | 86218155 | NM_146617    | chr7  | 86213218 | 86213652 |
| 7  | 86209656 | 86218155 | NM_146617    | chr7  | 86211926 | 86212603 |
| 7  | 86209656 | 86218155 | NM_146617    | chr7  | 86211093 | 86211693 |
| X  | 86183072 | 86191571 | NM_001033880 | chrX  | 86184702 | 86185445 |
| 8  | 86118318 | 86126817 | BC057027     | chr8  | 86121905 | 86122579 |
| 2  | 86074825 | 86083324 | NM_207562    | chr2  | 86076251 | 86076848 |
| 2  | 85930001 | 85938500 | NM_001011784 | chr2  | 85935993 | 85936609 |
| 15 | 85879473 | 85887972 | NM_172611    | chr15 | 85884980 | 85885577 |
| 2  | 85841323 | 85849822 | NM_001011872 | chr2  | 85845703 | 85846861 |
| 2  | 85802617 | 85811116 | NM_146579    | chr2  | 85809747 | 85810352 |
| 2  | 85778681 | 85795157 | NM_001011759 | chr2  | 85790506 | 85791107 |
| 2  | 85770084 | 85778583 | NM_001011852 | chr2  | 85776419 | 85777034 |
| 12 | 85657018 | 85665524 | BC022589     | chr12 | 85663050 | 85663759 |
| 12 | 85660163 | 85668860 | NM_023409    | chr12 | 85663050 | 85663759 |
| 2  | 85644259 | 85652760 | NM_146580    | chr2  | 85651067 | 85651708 |
| 2  | 85516246 | 85524745 | NM_146572    | chr2  | 85522422 | 85523027 |
| 12 | 85504619 | 85513161 | NM_008992    | chr12 | 85504613 | 85505228 |
| 6  | 85411731 | 85420233 | NM_007638    | chr6  | 85416334 | 85416934 |
| 6  | 85414407 | 85422926 | NM_028505    | chr6  | 85416334 | 85416934 |
| 15 | 85027777 | 85036345 | NM_010180    | chr15 | 85028311 | 85028946 |
| 12 | 84871638 | 84880137 | NM_134188    | chr12 | 84874695 | 84875314 |
| 18 | 84840769 | 84856934 | NM_173770    | chr18 | 84856228 | 84856885 |

|    |          |          |              |       |          |          |
|----|----------|----------|--------------|-------|----------|----------|
| 15 | 84745167 | 84753693 | NM_016714    | chr15 | 84751556 | 84752192 |
| 15 | 84485010 | 84499885 | BC024991     | chr15 | 84498092 | 84498737 |
| 2  | 84469041 | 84484886 | NM_025868    | chr2  | 84471452 | 84472040 |
| 17 | 84414221 | 84422755 | NM_177606    | chr17 | 84414949 | 84415535 |
| 3  | 84388115 | 84396614 | AF220017     | chr3  | 84393975 | 84394595 |
| 11 | 84327172 | 84335696 | NM_019816    | chr11 | 84329984 | 84331052 |
| 10 | 84261947 | 84270446 | NM_027689    | chr10 | 84268876 | 84269521 |
| 3  | 84123565 | 84132088 | NM_172681    | chr3  | 84127920 | 84128562 |
| 7  | 83762442 | 83770975 | NM_023403    | chr7  | 83767846 | 83768539 |
| 6  | 83670922 | 83679429 | NM_011912    | chr6  | 83678602 | 83679194 |
| 9  | 83625436 | 83634986 | NM_009445    | chr9  | 83625492 | 83626049 |
| 2  | 83454849 | 83463348 | BC028787     | chr2  | 83461693 | 83462376 |
| 14 | 83247590 | 83256197 | NM_001013753 | chr14 | 83248281 | 83249138 |
| 11 | 83219512 | 83228766 | NM_001013386 | chr11 | 83220361 | 83221069 |
| 12 | 83169433 | 83177932 | NM_172579    | chr12 | 83170317 | 83171003 |
| 6  | 83125609 | 83134108 | BC066061     | chr6  | 83128098 | 83128692 |
| 11 | 83104499 | 83121419 | NM_001035854 | chr11 | 83115503 | 83116107 |
| 11 | 83112211 | 83121172 | NM_134025    | chr11 | 83115503 | 83116107 |
| 9  | 82940744 | 82949323 | NM_175074    | chr9  | 82943162 | 82943764 |
| 15 | 82858598 | 82867097 | AF361364     | chr15 | 82862651 | 82863270 |
| 11 | 82834470 | 82843005 | NM_181545    | chr11 | 82836060 | 82836773 |
| 11 | 82684440 | 82692939 | NM_001007465 | chr11 | 82691071 | 82691682 |
| 1  | 82644973 | 82653480 | NM_025453    | chr1  | 82647075 | 82647803 |
| 8  | 82605188 | 82613812 | NM_015751    | chr8  | 82606912 | 82607510 |
| 7  | 82518826 | 82528206 | NM_175317    | chr7  | 82525086 | 82525753 |
| 7  | 82522209 | 82530713 | NM_177894    | chr7  | 82525086 | 82525753 |
| 1  | 82460000 | 82468499 | NM_007734    | chr1  | 82465304 | 82465920 |
| 1  | 82463317 | 82471816 | NM_007735    | chr1  | 82465304 | 82465920 |
| 10 | 82282978 | 82298957 | NM_001042514 | chr10 | 82295361 | 82295957 |
| 15 | 82120718 | 82129247 | NM_029066    | chr15 | 82121162 | 82121955 |
| 10 | 82117879 | 82126449 | NM_029102    | chr10 | 82120256 | 82120854 |
| 15 | 82096657 | 82105269 | NM_011889    | chr15 | 82096944 | 82097594 |
| X  | 82026805 | 82035538 | NM_212444    | chrX  | 82030706 | 82031544 |
| 11 | 81845769 | 81854333 | NM_011333    | chr11 | 81848279 | 81849018 |
| 15 | 81836774 | 81846182 | NM_010247    | chr15 | 81840725 | 81841322 |
| 15 | 81840788 | 81849416 | NM_134095    | chr15 | 81840725 | 81841322 |
| 13 | 81818152 | 81826651 | BC043465     | chr13 | 81824659 | 81825274 |
| 15 | 81693718 | 81702261 | NM_080633    | chr15 | 81699280 | 81699924 |
| 15 | 81696648 | 81705163 | NM_026737    | chr15 | 81699280 | 81699924 |
| 12 | 81431319 | 81440150 | BC110634     | chr12 | 81433600 | 81434195 |
| 7  | 81325689 | 81334189 | NM_007755    | chr7  | 81328442 | 81329075 |
| 12 | 81176657 | 81185156 | NM_134156    | chr12 | 81177282 | 81177994 |
| 10 | 81026676 | 81035175 | NM_027480    | chr10 | 81032026 | 81032620 |
| 10 | 81028188 | 81036687 | NM_181586    | chr10 | 81032026 | 81032620 |
| 10 | 80766420 | 80774919 | NM_001014836 | chr10 | 80768408 | 80769188 |
| 10 | 80665301 | 80673868 | NM_018758    | chr10 | 80668198 | 80668804 |
| 10 | 80667539 | 80676055 | NM_025317    | chr10 | 80668198 | 80668804 |

|    |          |                       |       |          |          |
|----|----------|-----------------------|-------|----------|----------|
| 18 | 80288119 | 80296618 BC024969     | chr18 | 80289205 | 80289802 |
| 10 | 80223785 | 80232284 NM_008753    | chr10 | 80231682 | 80232242 |
| 10 | 80191534 | 80210876 NM_013651    | chr10 | 80209720 | 80210323 |
| 7  | 80103598 | 80112132 NM_011870    | chr7  | 80111307 | 80111927 |
| 10 | 80072606 | 80085003 NM_021462    | chr10 | 80083402 | 80084154 |
| 10 | 80072606 | 80085003 NM_021462    | chr10 | 80075721 | 80076546 |
| 11 | 79894634 | 79903152 NM_018776    | chr11 | 79896815 | 79897557 |
| 10 | 79564970 | 79585370 NM_007909    | chr10 | 79578604 | 79579199 |
| 15 | 79310576 | 79319075 U11075       | chr15 | 79316831 | 79317656 |
| 2  | 79227328 | 79235827 NM_001048176 | chr2  | 79228426 | 79229032 |
| 7  | 79140779 | 79149308 NM_018811    | chr7  | 79147112 | 79147737 |
| 10 | 79113763 | 79122262 NM_008226    | chr10 | 79115885 | 79116488 |
| 2  | 78663886 | 78672385 NM_009454    | chr2  | 78671279 | 78672089 |
| 17 | 78653357 | 78661856 BC019508     | chr17 | 78656343 | 78657106 |
| 1  | 78554613 | 78563112 BC031529     | chr1  | 78560268 | 78561149 |
| 15 | 78418302 | 78426874 NM_028195    | chr15 | 78425756 | 78426635 |
| 15 | 78379604 | 78396067 BC114397     | chr15 | 78386662 | 78387268 |
| 15 | 78365341 | 78377600 NM_009218    | chr15 | 78372360 | 78373191 |
| 18 | 78338711 | 78347210 AF367359     | chr18 | 78345144 | 78346052 |
| 6  | 78305855 | 78314374 NM_013893    | chr6  | 78313699 | 78314304 |
| 12 | 78150965 | 78160360 NM_016893    | chr12 | 78152200 | 78153224 |
| 11 | 78134393 | 78147116 NM_201406    | chr11 | 78134871 | 78135467 |
| 1  | 78077455 | 78086283 NM_008781    | chr1  | 78080545 | 78081149 |
| 15 | 77943716 | 77953283 NM_007583    | chr15 | 77945722 | 77946329 |
| 18 | 77296043 | 77304542 AF039567     | chr18 | 77303807 | 77304392 |
| 15 | 77235768 | 77244357 BC057684     | chr15 | 77240940 | 77241838 |
| 10 | 77144360 | 77172719 NM_010670    | chr10 | 77163896 | 77164808 |
| 10 | 77144360 | 77172719 NM_010670    | chr10 | 77159430 | 77160125 |
| 18 | 77142565 | 77151367 NM_001039201 | chr18 | 77145705 | 77146289 |
| 12 | 77093600 | 77102099 NM_207707    | chr12 | 77094339 | 77094729 |
| 10 | 77043950 | 77052505 NM_019929    | chr10 | 77048183 | 77048791 |
| 2  | 76968976 | 76977475 NM_001025576 | chr2  | 76972450 | 76973303 |
| 12 | 76652001 | 76660519 NM_030750    | chr12 | 76659164 | 76659761 |
| 12 | 76652001 | 76660519 NM_030750    | chr12 | 76655038 | 76655656 |
| 15 | 76535232 | 76557095 NM_058214    | chr15 | 76550443 | 76551093 |
| 13 | 76520479 | 76528998 NM_175495    | chr13 | 76521976 | 76522560 |
| 15 | 76397614 | 76406113 NM_172960    | chr15 | 76401948 | 76402822 |
| 15 | 76360138 | 76368697 NM_029643    | chr15 | 76365235 | 76365970 |
| 15 | 76363491 | 76371990 NM_013909    | chr15 | 76365235 | 76365970 |
| 16 | 76232706 | 76241205 BC060232     | chr16 | 76235638 | 76236239 |
| 12 | 76093018 | 76102172 NM_172805    | chr12 | 76100861 | 76101637 |
| 15 | 76020466 | 76042420 NM_201389    | chr15 | 76020603 | 76021224 |
| X  | 75885786 | 75900491 BC050207     | chrX  | 75891861 | 75892531 |
| 11 | 75724758 | 75733257 NM_029548    | chr11 | 75731779 | 75732554 |
| 8  | 75651952 | 75660455 NM_007975    | chr8  | 75652536 | 75653132 |
| 16 | 75646959 | 75655458 NM_030201    | chr16 | 75649810 | 75650355 |
| 4  | 75602208 | 75611113 NM_001014288 | chr4  | 75608376 | 75609123 |

|   |    |          |                       |       |          |          |
|---|----|----------|-----------------------|-------|----------|----------|
|   | 2  | 75454116 | 75462656 NM_198090    | chr2  | 75459367 | 75459965 |
|   | 11 | 75441183 | 75449749 NM_008916    | chr11 | 75443487 | 75444219 |
|   | 8  | 75418852 | 75427351 NM_177766    | chr8  | 75425367 | 75426624 |
|   | 11 | 75296972 | 75305784 NM_138659    | chr11 | 75304227 | 75304816 |
|   | 14 | 75232720 | 75241219 NM_009366    | chr14 | 75238903 | 75239717 |
|   | 3  | 75227150 | 75235649 NM_172515    | chr3  | 75227237 | 75227847 |
|   | 10 | 75214582 | 75231130 NM_133994    | chr10 | 75223465 | 75224002 |
|   | 18 | 75176084 | 75184583 BC018220     | chr18 | 75181628 | 75182111 |
|   | 18 | 75119853 | 75133773 NM_001001181 | chr18 | 75130609 | 75131602 |
|   | 1  | 75113613 | 75122203 NM_178055    | chr1  | 75116508 | 75117334 |
|   | 10 | 74958507 | 74967096 NM_175133    | chr10 | 74966303 | 74966902 |
|   | 10 | 74958507 | 74967096 NM_175133    | chr10 | 74959483 | 74960153 |
|   | 12 | 74873980 | 74885895 NM_178392    | chr12 | 74877582 | 74878194 |
|   | 13 | 74810345 | 74818866 NM_024201    | chr13 | 74818795 | 74819446 |
|   | 13 | 74813727 | 74822242 NM_023281    | chr13 | 74818795 | 74819446 |
|   | 8  | 74551368 | 74562598 BC058348     | chr8  | 74557096 | 74558075 |
|   | 1  | 74515568 | 74525189 NM_025784    | chr1  | 74518842 | 74519851 |
|   | 1  | 74518672 | 74527235 NM_029888    | chr1  | 74518842 | 74519851 |
|   | 7  | 74425627 | 74434293 NM_023908    | chr7  | 74429855 | 74430473 |
|   | 8  | 74307874 | 74316941 NM_010150    | chr8  | 74309995 | 74310610 |
|   | 1  | 74205757 | 74220761 NM_001039509 | chr1  | 74208436 | 74209033 |
|   | 18 | 74093659 | 74102158 BC062911     | chr18 | 74095146 | 74095730 |
| X |    | 74046180 | 74054679 NM_016979    | chrX  | 74050227 | 74050839 |
| X |    | 74046180 | 74054679 NM_016979    | chrX  | 74049257 | 74049740 |
|   | 11 | 74020985 | 74029484 NM_146711    | chr11 | 74022743 | 74023381 |
|   | 5  | 73924367 | 73932879 NM_011890    | chr5  | 73929973 | 73930680 |
|   | 18 | 73877319 | 73885848 NM_053255    | chr18 | 73881333 | 73881963 |
|   | 13 | 73791011 | 73799542 NM_053163    | chr13 | 73791176 | 73791953 |
|   | 8  | 73731473 | 73739982 NM_008353    | chr8  | 73735012 | 73735741 |
|   | 9  | 73726129 | 73736699 BC030416     | chr9  | 73726974 | 73727645 |
|   | 5  | 73679213 | 73687884 NM_181323    | chr5  | 73686898 | 73687539 |
|   | 8  | 73621938 | 73630544 NM_010592    | chr8  | 73629744 | 73630354 |
|   | 8  | 73517470 | 73525978 NM_023627    | chr8  | 73521549 | 73522492 |
|   | 11 | 73403432 | 73411931 NM_147023    | chr11 | 73409696 | 73410404 |
|   | 11 | 73403432 | 73411931 NM_147023    | chr11 | 73405390 | 73406265 |
|   | 5  | 73323637 | 73332136 BC043713     | chr5  | 73330635 | 73331248 |
|   | 4  | 73259334 | 73268237 NM_001017427 | chr4  | 73266743 | 73267629 |
|   | 3  | 73140370 | 73148869 NM_198864    | chr3  | 73146363 | 73146993 |
|   | 11 | 73138297 | 73146829 NM_023113    | chr11 | 73142319 | 73142992 |
|   | 11 | 73139936 | 73148435 NM_001045531 | chr11 | 73142319 | 73142992 |
|   | 12 | 72987076 | 72995575 NM_181752    | chr12 | 72992541 | 72993023 |
|   | 8  | 72922854 | 72931353 NM_145596    | chr8  | 72924326 | 72924969 |
|   | 5  | 72895771 | 72904270 M84742       | chr5  | 72900215 | 72900809 |
|   | 11 | 72829238 | 72837747 NM_018883    | chr11 | 72830333 | 72830918 |
|   | 17 | 72817317 | 72825825 NM_029999    | chr17 | 72819466 | 72820062 |
|   | 11 | 72809337 | 72817836 NM_008771    | chr11 | 72815215 | 72816024 |
|   | 1  | 72804983 | 72814072 NM_010518    | chr1  | 72810870 | 72811461 |

|   |    |          |                       |       |          |          |
|---|----|----------|-----------------------|-------|----------|----------|
|   | 5  | 72793932 | 72809364 BC022652     | chr5  | 72795861 | 72796354 |
|   | 5  | 72780844 | 72789608 NM_016869    | chr5  | 72786267 | 72786821 |
|   | 8  | 72745418 | 72754053 NM_020028    | chr8  | 72746264 | 72746886 |
|   | 8  | 72714223 | 72729884 NM_133224    | chr8  | 72726786 | 72727557 |
|   | 6  | 72270843 | 72288161 NM_144916    | chr6  | 72277571 | 72278255 |
|   | 6  | 72272185 | 72280684 NM_138592    | chr6  | 72277571 | 72278255 |
|   | 7  | 72177609 | 72186108 NM_001024703 | chr7  | 72178768 | 72179420 |
|   | 12 | 71928435 | 71937184 AY116674     | chr12 | 71936312 | 71936914 |
|   | 14 | 71870343 | 71878842 NM_134083    | chr14 | 71871633 | 71872236 |
|   | 4  | 71683913 | 71693223 NM_011599    | chr4  | 71690602 | 71691207 |
| X |    | 71663418 | 71671919 NM_145956    | chrX  | 71669625 | 71670456 |
| X |    | 71666764 | 71675263 NM_001039373 | chrX  | 71669625 | 71670456 |
| X |    | 71663418 | 71671919 NM_145956    | chrX  | 71665667 | 71666329 |
| X |    | 71629142 | 71637641 NM_026126    | chrX  | 71634730 | 71635459 |
| X |    | 71630262 | 71641036 NM_007977    | chrX  | 71634730 | 71635459 |
|   | 6  | 71417403 | 71425902 NM_009543    | chr6  | 71423321 | 71423921 |
|   | 10 | 71373491 | 71381994 NM_175390    | chr10 | 71374882 | 71375720 |
| X |    | 71342636 | 71351307 NM_001030307 | chrX  | 71348716 | 71349455 |
|   | 2  | 71306015 | 71314514 BC051534     | chr2  | 71313666 | 71314278 |
|   | 13 | 71306683 | 71315183 NM_172053    | chr13 | 71308214 | 71308903 |
| X |    | 70841048 | 70849547 NM_146398    | chrX  | 70847094 | 70848052 |
| X |    | 70643495 | 70651994 NM_025473    | chrX  | 70644223 | 70645382 |
|   | 2  | 70623820 | 70632319 NM_172664    | chr2  | 70624071 | 70624689 |
| X |    | 70618748 | 70632018 NM_145406    | chrX  | 70621299 | 70622376 |
| X |    | 70618748 | 70632018 NM_145406    | chrX  | 70618856 | 70619671 |
| X |    | 70529470 | 70568289 NM_177234    | chrX  | 70562529 | 70563124 |
| X |    | 70529470 | 70568289 NM_177234    | chrX  | 70557619 | 70558162 |
| X |    | 70529470 | 70568289 NM_177234    | chrX  | 70556271 | 70556945 |
| X |    | 70529470 | 70568289 NM_177234    | chrX  | 70552564 | 70553177 |
| X |    | 70529470 | 70568289 NM_177234    | chrX  | 70550871 | 70551481 |
| X |    | 70529470 | 70568289 NM_177234    | chrX  | 70529503 | 70530240 |
|   | 9  | 70373430 | 70381929 BC019992     | chr9  | 70379770 | 70380379 |
| X |    | 70274134 | 70282656 NM_008363    | chrX  | 70280237 | 70281307 |
| X |    | 70274134 | 70282656 NM_008363    | chrX  | 70277379 | 70278054 |
|   | 11 | 70262126 | 70278316 NM_001029929 | chr11 | 70270560 | 70271178 |
|   | 12 | 70236643 | 70246957 BC053488     | chr12 | 70239181 | 70239724 |
| X |    | 70181007 | 70189538 NM_023132    | chrX  | 70183276 | 70183887 |
| X |    | 70181007 | 70189538 NM_023132    | chrX  | 70181830 | 70182652 |
|   | 18 | 70176165 | 70184957 NM_030554    | chr18 | 70177694 | 70178292 |
| X |    | 70172066 | 70180633 NM_019870    | chrX  | 70175249 | 70176249 |
| X |    | 70138822 | 70147333 NM_019404    | chrX  | 70145908 | 70146652 |
| X |    | 70037091 | 70045617 NM_008323    | chrX  | 70043395 | 70044935 |
| X |    | 70033782 | 70042444 NM_009279    | chrX  | 70040763 | 70041370 |
| X |    | 70037091 | 70045617 NM_008323    | chrX  | 70040763 | 70041370 |
| X |    | 70033782 | 70042444 NM_009279    | chrX  | 70033991 | 70034679 |
| X |    | 70021142 | 70029646 NM_019684    | chrX  | 70028355 | 70029148 |
| X |    | 69965150 | 69974895 NM_012060    | chrX  | 69973759 | 69974695 |



|   |    |          |                       |       |          |          |
|---|----|----------|-----------------------|-------|----------|----------|
| X |    | 69963317 | 69971987 NM_007435    | chrX  | 69967624 | 69968496 |
| X |    | 69965150 | 69974895 NM_012060    | chrX  | 69967624 | 69968496 |
| X |    | 69919870 | 69928369 NM_133987    | chrX  | 69927134 | 69927731 |
| X |    | 69886161 | 69894660 NM_029352    | chrX  | 69890131 | 69890884 |
| X |    | 69886161 | 69894660 NM_029352    | chrX  | 69886614 | 69887451 |
|   | 5  | 69868921 | 69877420 NM_001038015 | chr5  | 69869868 | 69870874 |
|   | 11 | 69775696 | 69784552 NM_016887    | chr11 | 69780218 | 69781050 |
| X |    | 69684897 | 69694050 NM_011907    | chrX  | 69691879 | 69692627 |
| X |    | 69684897 | 69694050 NM_011907    | chrX  | 69685363 | 69686086 |
| X |    | 69603873 | 69612372 BC019962     | chrX  | 69610663 | 69611660 |
| X |    | 69603873 | 69612372 BC019962     | chrX  | 69606145 | 69606971 |
| X |    | 69603873 | 69612372 BC019962     | chrX  | 69604438 | 69605025 |
| X |    | 69540736 | 69549235 NM_031493    | chrX  | 69540785 | 69541377 |
| X |    | 69513675 | 69524110 NM_011727    | chrX  | 69516780 | 69517676 |
| X |    | 69493241 | 69501740 NM_183094    | chrX  | 69495327 | 69496157 |
| X |    | 69493241 | 69501740 NM_183094    | chrX  | 69493945 | 69494535 |
|   | 11 | 69476338 | 69494510 NM_144958    | chr11 | 69486724 | 69487330 |
| X |    | 69474738 | 69483525 NM_007978    | chrX  | 69474840 | 69475541 |
| X |    | 69461069 | 69469609 NM_021365    | chrX  | 69467433 | 69468502 |
| X |    | 69438936 | 69447441 BC064787     | chrX  | 69446700 | 69447295 |
| X |    | 69438936 | 69447441 BC064787     | chrX  | 69443832 | 69444738 |
|   | 11 | 69431586 | 69440100 NM_011367    | chr11 | 69431906 | 69432505 |
|   | 11 | 69432247 | 69440803 BC061227     | chr11 | 69431906 | 69432505 |
|   | 8  | 69412987 | 69421509 NM_025465    | chr8  | 69413397 | 69414009 |
| X |    | 69399671 | 69408170 NM_001025384 | chrX  | 69400508 | 69401484 |
| X |    | 69363767 | 69378335 NM_001025383 | chrX  | 69375232 | 69376168 |
| X |    | 69367923 | 69376422 NM_001045539 | chrX  | 69375232 | 69376168 |
| X |    | 69363767 | 69378335 NM_001025383 | chrX  | 69367521 | 69368618 |
| X |    | 69367923 | 69376422 NM_001045539 | chrX  | 69367521 | 69368618 |
| X |    | 69363767 | 69378335 NM_001025383 | chrX  | 69366739 | 69367367 |
| X |    | 69345296 | 69355761 NM_011726    | chrX  | 69352721 | 69353335 |
| X |    | 69345296 | 69355761 NM_011726    | chrX  | 69347508 | 69348323 |
| X |    | 69345296 | 69355761 NM_011726    | chrX  | 69345395 | 69346182 |
| X |    | 69332699 | 69341198 BC098242     | chrX  | 69333856 | 69334942 |
| X |    | 69332699 | 69341198 BC098242     | chrX  | 69332756 | 69333656 |
| X |    | 69243754 | 69253000 NM_009549    | chrX  | 69252567 | 69253522 |
| X |    | 69243754 | 69253000 NM_009549    | chrX  | 69251582 | 69252172 |
| X |    | 69243754 | 69253000 NM_009549    | chrX  | 69248665 | 69249297 |
|   | 11 | 69205986 | 69220207 NM_030083    | chr11 | 69209456 | 69210043 |
|   | 11 | 69209042 | 69220429 NM_025915    | chr11 | 69209456 | 69210043 |
|   | 14 | 69186597 | 69195096 NM_145981    | chr14 | 69187400 | 69187986 |
| X |    | 69165241 | 69173881 NM_010941    | chrX  | 69173017 | 69173771 |
| X |    | 69167073 | 69177064 NM_019405    | chrX  | 69173017 | 69173771 |
| X |    | 69165241 | 69173881 NM_010941    | chrX  | 69171230 | 69172346 |
| X |    | 69167073 | 69177064 NM_019405    | chrX  | 69171230 | 69172346 |
|   | 11 | 69151012 | 69159519 NM_020591    | chr11 | 69152371 | 69153098 |
| X |    | 69072156 | 69080657 NM_020488    | chrX  | 69079337 | 69080223 |

|   |    |          |                       |       |          |          |
|---|----|----------|-----------------------|-------|----------|----------|
|   | 10 | 68597909 | 68610532 BC099973     | chr10 | 68608506 | 68609088 |
|   | 3  | 67974149 | 67982684 NM_177585    | chr3  | 67974751 | 67975370 |
| X |    | 67918323 | 67926822 NM_010340    | chrX  | 67921647 | 67922279 |
| X |    | 67810510 | 67821105 NM_008253    | chrX  | 67812461 | 67813355 |
|   | 11 | 67584849 | 67593348 NM_175681    | chr11 | 67585584 | 67586179 |
|   | 5  | 67533787 | 67542485 NM_028975    | chr5  | 67538660 | 67539433 |
|   | 10 | 67529484 | 67537983 AF401550     | chr10 | 67536883 | 67537454 |
|   | 3  | 67512051 | 67520578 NM_138591    | chr3  | 67518245 | 67519158 |
|   | 16 | 67361501 | 67370000 NM_177254    | chr16 | 67365924 | 67366784 |
|   | 13 | 67362579 | 67371671 NM_008959    | chr13 | 67365626 | 67366267 |
|   | 14 | 67075835 | 67084334 NM_008691    | chr14 | 67081065 | 67081673 |
|   | 1  | 67050274 | 67058773 BC126969     | chr1  | 67057865 | 67058496 |
|   | 6  | 66964465 | 66972985 NM_007836    | chr6  | 66964785 | 66965593 |
|   | 6  | 66606763 | 66615262 NM_134167    | chr6  | 66612237 | 66612853 |
|   | 7  | 66565335 | 66574424 NM_178236    | chr7  | 66571874 | 66572528 |
|   | 12 | 65915278 | 65923777 BC062107     | chr12 | 65921778 | 65922293 |
|   | 14 | 65820211 | 65828710 NM_009955    | chr14 | 65825613 | 65826618 |
|   | 5  | 65664632 | 65673232 NM_024471    | chr5  | 65667418 | 65668016 |
|   | 11 | 65601945 | 65610492 NM_009157    | chr11 | 65605731 | 65606438 |
|   | 11 | 65601945 | 65610492 NM_009157    | chr11 | 65604966 | 65605568 |
|   | 17 | 65536800 | 65547711 NM_153519    | chr17 | 65541783 | 65542386 |
| X |    | 64933220 | 64941864 NM_008031    | chrX  | 64937074 | 64937855 |
|   | 9  | 64933160 | 64941717 NM_008988    | chr9  | 64933601 | 64934361 |
|   | 14 | 64916735 | 64931450 NM_013492    | chr14 | 64929855 | 64930442 |
|   | 1  | 64926396 | 64934895 NM_011287    | chr1  | 64928650 | 64929243 |
|   | 6  | 64652703 | 64661234 NM_007500    | chr6  | 64657336 | 64658015 |
|   | 4  | 64604535 | 64613034 NM_021362    | chr4  | 64608175 | 64608787 |
|   | 18 | 64572559 | 64581058 NM_007444    | chr18 | 64575992 | 64576669 |
|   | 7  | 64058533 | 64067039 AF047714     | chr7  | 64065269 | 64065856 |
|   | 1  | 63893003 | 63901502 NM_001013800 | chr1  | 63895863 | 63896514 |
|   | 9  | 63816828 | 63826065 NM_008542    | chr9  | 63818885 | 63819692 |
|   | 7  | 63317722 | 63326221 NM_130880    | chr7  | 63320259 | 63320876 |
|   | 4  | 63039147 | 63051316 NM_144905    | chr4  | 63042503 | 63043169 |
|   | 4  | 63025167 | 63033697 NM_024173    | chr4  | 63028379 | 63028948 |
| X |    | 62907824 | 62916323 NM_198863    | chrX  | 62914580 | 62915690 |
|   | 10 | 62846868 | 62855367 AF344871     | chr10 | 62854542 | 62855137 |
|   | 16 | 62790590 | 62799123 NM_011173    | chr16 | 62796675 | 62797290 |
|   | 16 | 62786754 | 62795253 NM_026577    | chr16 | 62790472 | 62791176 |
|   | 16 | 62790590 | 62799123 NM_011173    | chr16 | 62790472 | 62791176 |
|   | 14 | 62743129 | 62751628 NM_173393    | chr14 | 62744595 | 62745070 |
|   | 16 | 62726473 | 62735014 NM_178925    | chr16 | 62729179 | 62729791 |
|   | 4  | 62638004 | 62646516 NM_007443    | chr4  | 62640816 | 62641419 |
|   | 11 | 62630448 | 62639163 NM_053169    | chr11 | 62636754 | 62637461 |
|   | 2  | 62410116 | 62418615 BC025508     | chr2  | 62415023 | 62415934 |
|   | 17 | 62369952 | 62378451 BC016608     | chr17 | 62376641 | 62377103 |
|   | 18 | 62302829 | 62311328 NM_007420    | chr18 | 62304491 | 62305085 |
|   | 7  | 62221227 | 62229804 NM_010882    | chr7  | 62222332 | 62223027 |

|    |          |          |              |       |          |          |
|----|----------|----------|--------------|-------|----------|----------|
| 14 | 62129404 | 62137903 | NM_010191    | chr14 | 62130726 | 62131342 |
| 14 | 62081425 | 62089924 | M14222       | chr14 | 62086882 | 62087499 |
| 18 | 62034668 | 62043192 | NM_198649    | chr18 | 62040206 | 62040598 |
| 11 | 61668313 | 61677268 | NM_013881    | chr11 | 61672494 | 61673089 |
| 13 | 61577189 | 61585747 | NM_026906    | chr13 | 61581866 | 61582582 |
| 10 | 61522447 | 61531031 | NM_009719    | chr10 | 61527376 | 61528022 |
| 2  | 61373422 | 61381923 | NM_011529    | chr2  | 61380391 | 61381008 |
| 11 | 61267578 | 61276124 | NM_009548    | chr11 | 61269230 | 61269986 |
| 13 | 61170368 | 61179879 | NM_020284    | chr13 | 61170635 | 61171247 |
| 18 | 61045001 | 61053519 | NM_177407    | chr18 | 61049585 | 61050191 |
| 13 | 61011688 | 61021548 | NM_012007    | chr13 | 61019298 | 61019884 |
| 1  | 60916460 | 60924975 | NM_017480    | chr1  | 60916915 | 60917516 |
| 2  | 60761532 | 60774952 | NM_020296    | chr2  | 60766121 | 60766736 |
| 11 | 60692482 | 60701227 | NM_173453    | chr11 | 60693652 | 60694278 |
| 2  | 60679810 | 60688309 | BC057866     | chr2  | 60682844 | 60683546 |
| 3  | 60611078 | 60619577 | AF231110     | chr3  | 60615487 | 60616171 |
| 2  | 60351601 | 60360117 | NM_008867    | chr2  | 60358168 | 60358778 |
| 2  | 60070539 | 60079038 | BC005501     | chr2  | 60073056 | 60073847 |
| 1  | 60036827 | 60045326 | NM_139150    | chr1  | 60042685 | 60043315 |
| 1  | 60039610 | 60048721 | NM_021312    | chr1  | 60042685 | 60043315 |
| 11 | 59601353 | 59609852 | BC119245     | chr11 | 59608980 | 59609584 |
| 16 | 59578810 | 59587423 | NM_019665    | chr16 | 59579279 | 59579875 |
| 9  | 59428715 | 59437214 | BC030184     | chr9  | 59431233 | 59431808 |
| 16 | 59408098 | 59416823 | NM_025910    | chr16 | 59412452 | 59413272 |
| 11 | 59403873 | 59412372 | NM_146429    | chr11 | 59408925 | 59409561 |
| 9  | 59381358 | 59389857 | BC057083     | chr9  | 59381363 | 59381917 |
| 14 | 59326430 | 59334955 | NM_028113    | chr14 | 59328802 | 59329525 |
| 14 | 59202989 | 59211519 | NM_170591    | chr14 | 59207992 | 59208576 |
| 15 | 59201334 | 59209848 | NM_153548    | chr15 | 59207973 | 59208562 |
| 16 | 59085085 | 59093584 | NM_146998    | chr16 | 59085654 | 59086248 |
| 2  | 58958967 | 58967466 | BC062650     | chr2  | 58965120 | 58965913 |
| 4  | 58913026 | 58921525 | BC025035     | chr4  | 58917062 | 58917634 |
| 8  | 58796588 | 58805090 | NM_175939    | chr8  | 58799315 | 58799927 |
| 10 | 58785033 | 58801541 | NM_023530    | chr10 | 58786666 | 58787248 |
| 15 | 58761311 | 58769813 | NM_175151    | chr15 | 58766898 | 58767514 |
| 16 | 58737669 | 58746168 | NM_147000    | chr16 | 58739585 | 58740200 |
| 3  | 58611160 | 58619683 | NM_030685    | chr3  | 58618137 | 58618735 |
| 16 | 58606835 | 58615393 | NM_007757    | chr16 | 58614868 | 58615317 |
| 11 | 58588284 | 58604930 | NM_001011760 | chr11 | 58601961 | 58602713 |
| 11 | 58546859 | 58555358 | NM_001011769 | chr11 | 58552961 | 58553546 |
| 11 | 58534742 | 58543241 | NM_146501    | chr11 | 58540572 | 58541427 |
| 11 | 58511898 | 58520397 | NM_146500    | chr11 | 58517513 | 58518155 |
| 11 | 58494070 | 58502569 | NM_207230    | chr11 | 58499756 | 58500398 |
| 1  | 58446966 | 58455473 | NM_008765    | chr1  | 58446986 | 58447465 |
| 1  | 58383697 | 58394678 | NM_022988    | chr1  | 58389474 | 58390070 |
| 1  | 58387302 | 58396032 | NM_027374    | chr1  | 58389474 | 58390070 |
| 11 | 58189241 | 58197751 | NM_027339    | chr11 | 58195779 | 58196495 |

|   |    |          |                       |       |          |          |
|---|----|----------|-----------------------|-------|----------|----------|
|   | 3  | 58189720 | 58198219 BC083355     | chr3  | 58191602 | 58192183 |
|   | 9  | 58166073 | 58174592 BC100468     | chr9  | 58172562 | 58173167 |
|   | 1  | 58148943 | 58157515 NM_023631    | chr1  | 58153834 | 58154377 |
|   | 14 | 58149349 | 58157851 NM_027764    | chr14 | 58152568 | 58153187 |
|   | 12 | 58112809 | 58121484 NM_172577    | chr12 | 58113699 | 58114397 |
| X |    | 57964279 | 57972780 NM_001018087 | chrX  | 57971591 | 57972188 |
|   | 4  | 57942213 | 57951113 NM_001035533 | chr4  | 57947387 | 57947790 |
|   | 5  | 57890614 | 57899232 BC008259     | chr5  | 57892013 | 57892620 |
|   | 6  | 57828069 | 57836568 NM_134178    | chr6  | 57829215 | 57829834 |
|   | 6  | 57619096 | 57627648 NM_025574    | chr6  | 57622032 | 57622647 |
|   | 10 | 57616384 | 57638017 NM_001034869 | chr10 | 57619592 | 57620496 |
|   | 12 | 57528797 | 57537296 NM_008701    | chr12 | 57535377 | 57535967 |
|   | 10 | 57476959 | 57485458 NM_020561    | chr10 | 57482755 | 57483349 |
|   | 1  | 57345304 | 57354124 BC071241     | chr1  | 57345617 | 57346308 |
|   | 19 | 57248142 | 57256641 AF404775     | chr19 | 57250929 | 57251660 |
| X |    | 57151371 | 57159870 NM_009237    | chrX  | 57154527 | 57155227 |
|   | 18 | 57048202 | 57056917 NM_177115    | chr18 | 57052740 | 57053329 |
|   | 14 | 57020796 | 57029583 NM_013518    | chr14 | 57024158 | 57024935 |
|   | 4  | 56956743 | 56965249 NM_018761    | chr4  | 56958290 | 56959004 |
|   | 14 | 56950866 | 56959372 NM_028643    | chr14 | 56952766 | 56953429 |
|   | 16 | 56808315 | 56817117 NM_019631    | chr16 | 56809346 | 56809937 |
|   | 14 | 56774349 | 56783039 NM_026401    | chr14 | 56780543 | 56781205 |
|   | 14 | 56777766 | 56791319 NM_198605    | chr14 | 56780543 | 56781205 |
|   | 19 | 56769622 | 56778121 NM_007419    | chr19 | 56774094 | 56774694 |
|   | 9  | 56722683 | 56732508 NM_175483    | chr9  | 56724279 | 56724947 |
|   | 13 | 56706674 | 56715427 AF063006     | chr13 | 56712545 | 56713198 |
|   | 13 | 56605325 | 56621730 NM_009369    | chr13 | 56619617 | 56620657 |
|   | 13 | 56605325 | 56621730 NM_009369    | chr13 | 56618158 | 56618754 |
|   | 15 | 56522082 | 56530602 NM_008216    | chr15 | 56527799 | 56528294 |
|   | 14 | 56473017 | 56481816 NM_145837    | chr14 | 56475262 | 56476149 |
|   | 13 | 56441977 | 56450512 NM_177809    | chr13 | 56448036 | 56449091 |
|   | 19 | 56335173 | 56343687 NM_146101    | chr19 | 56339937 | 56340682 |
|   | 12 | 56215391 | 56224414 BC034876     | chr12 | 56220103 | 56220691 |
|   | 12 | 56218594 | 56227130 NM_021529    | chr12 | 56220103 | 56220691 |
|   | 7  | 55912272 | 55920907 NM_010418    | chr7  | 55915073 | 55915677 |
|   | 17 | 55902403 | 55916466 NM_174989    | chr17 | 55910550 | 55911151 |
|   | 17 | 55902403 | 55916466 NM_174989    | chr17 | 55906164 | 55906885 |
|   | 14 | 55763244 | 55771807 NM_144842    | chr14 | 55764907 | 55765522 |
|   | 1  | 55387086 | 55395591 BC085310     | chr1  | 55388627 | 55389454 |
|   | 16 | 55205658 | 55214188 NM_178720    | chr16 | 55207677 | 55208305 |
|   | 19 | 55150198 | 55158697 NM_008149    | chr19 | 55153307 | 55154074 |
|   | 3  | 55140348 | 55148984 NM_007628    | chr3  | 55144737 | 55145340 |
|   | 12 | 55122902 | 55131474 NM_028133    | chr12 | 55122911 | 55123538 |
|   | 9  | 55001132 | 55009631 NM_028049    | chr9  | 55005111 | 55005729 |
|   | 15 | 54936407 | 54945065 NM_145470    | chr15 | 54943526 | 54944258 |
|   | 3  | 54864138 | 54872747 AY145520     | chr3  | 54867618 | 54868309 |
|   | 13 | 54787625 | 54801582 NM_001033269 | chr13 | 54796237 | 54797147 |

|   |    |          |                       |       |          |          |
|---|----|----------|-----------------------|-------|----------|----------|
|   | 15 | 54747583 | 54756192 NM_015744    | chr15 | 54748951 | 54749625 |
|   | 14 | 54709499 | 54722601 NM_008519    | chr14 | 54717669 | 54718334 |
|   | 14 | 54709949 | 54718529 NM_009894    | chr14 | 54717669 | 54718334 |
|   | 14 | 54709499 | 54722601 NM_008519    | chr14 | 54716561 | 54717146 |
|   | 14 | 54709949 | 54718529 NM_009894    | chr14 | 54716561 | 54717146 |
|   | 11 | 54701840 | 54710339 NM_029327    | chr11 | 54707181 | 54707999 |
|   | 11 | 54703816 | 54712404 NM_008248    | chr11 | 54707181 | 54707999 |
|   | 13 | 54597173 | 54605696 NM_178605    | chr13 | 54604373 | 54604973 |
|   | 14 | 54566241 | 54574806 NM_020002    | chr14 | 54571409 | 54572120 |
|   | 6  | 54518689 | 54535224 NM_001001335 | chr6  | 54524497 | 54525113 |
|   | 6  | 54520207 | 54528728 NM_153573    | chr6  | 54524497 | 54525113 |
|   | 13 | 54475942 | 54484441 NM_028597    | chr13 | 54484058 | 54484606 |
| X |    | 54371412 | 54379926 NM_009575    | chrX  | 54376405 | 54376997 |
|   | 3  | 54276581 | 54285080 AF011543     | chr3  | 54276736 | 54277339 |
|   | 11 | 54238412 | 54246911 NM_025699    | chr11 | 54245102 | 54245924 |
|   | 5  | 54091916 | 54100426 NM_144517    | chr5  | 54098317 | 54098769 |
|   | 18 | 53981482 | 53989981 NM_152809    | chr18 | 53988565 | 53989155 |
|   | 3  | 53949200 | 53957735 NM_026435    | chr3  | 53955513 | 53956151 |
|   | 11 | 53909870 | 53918391 NM_019417    | chr11 | 53913368 | 53913972 |
|   | 14 | 53842359 | 53850858 NM_019402    | chr14 | 53847265 | 53847687 |
|   | 4  | 53794805 | 53803334 NM_009317    | chr4  | 53797920 | 53798551 |
|   | 4  | 53729098 | 53743604 NM_139309    | chr4  | 53741174 | 53741780 |
|   | 4  | 53729098 | 53743604 NM_139309    | chr4  | 53733871 | 53734467 |
|   | 1  | 53727200 | 53735715 NM_133810    | chr1  | 53728676 | 53729643 |
| X |    | 53683014 | 53691513 NM_152801    | chrX  | 53685269 | 53685856 |
|   | 10 | 53634918 | 53643417 NM_177131    | chr10 | 53635588 | 53636193 |
|   | 1  | 53252206 | 53260707 NM_028091    | chr1  | 53252984 | 53253701 |
|   | 17 | 53175438 | 53191179 NM_177599    | chr17 | 53180381 | 53181020 |
| X |    | 53163222 | 53175110 NM_177293    | chrX  | 53168296 | 53168963 |
| X |    | 53120472 | 53137271 NM_001077362 | chrX  | 53133716 | 53134785 |
| X |    | 53120472 | 53137271 NM_001077362 | chrX  | 53127999 | 53128714 |
|   | 3  | 53123476 | 53132011 NM_175386    | chr3  | 53126224 | 53126838 |
| X |    | 53095128 | 53103627 U41739       | chrX  | 53095453 | 53096473 |
| X |    | 53072571 | 53081240 NM_001077361 | chrX  | 53074844 | 53075802 |
|   | 4  | 52985723 | 52994228 NM_146607    | chr4  | 52985947 | 52986551 |
| X |    | 52950638 | 52959137 NM_172780    | chrX  | 52958175 | 52959066 |
|   | 18 | 52887078 | 52895962 NM_026408    | chr18 | 52894181 | 52894760 |
|   | 6  | 52637326 | 52645885 NM_025816    | chr6  | 52643843 | 52644495 |
|   | 1  | 52569282 | 52577791 NM_172654    | chr1  | 52573595 | 52574385 |
|   | 12 | 52263947 | 52272476 NM_001015099 | chr12 | 52269324 | 52269964 |
|   | 12 | 52263947 | 52272476 NM_001015099 | chr12 | 52267662 | 52268292 |
|   | 6  | 52085370 | 52100414 NM_010449    | chr6  | 52099962 | 52100368 |
|   | 6  | 52089257 | 52100592 BC094279     | chr6  | 52099962 | 52100368 |
|   | 6  | 52085370 | 52100414 NM_010449    | chr6  | 52096019 | 52096653 |
|   | 6  | 52089257 | 52100592 BC094279     | chr6  | 52096019 | 52096653 |
|   | 10 | 52067956 | 52076490 NM_053187    | chr10 | 52073297 | 52073896 |
|   | 10 | 52067956 | 52076490 NM_053187    | chr10 | 52068985 | 52069646 |

|   |    |          |          |              |       |          |          |
|---|----|----------|----------|--------------|-------|----------|----------|
|   | 1  | 52057983 | 52066546 | NM_009283    | chr1  | 52064714 | 52065657 |
|   | 3  | 51743122 | 51751621 | NM_174995    | chr3  | 51750072 | 51751236 |
|   | 7  | 51740986 | 51749668 | NM_008087    | chr7  | 51748609 | 51749211 |
|   | 13 | 51577081 | 51585580 | NM_009167    | chr13 | 51580759 | 51581353 |
|   | 3  | 51565895 | 51574444 | NM_016858    | chr3  | 51571274 | 51571874 |
|   | 9  | 51511717 | 51520216 | NM_175535    | chr9  | 51513262 | 51513833 |
|   | 3  | 51408875 | 51419966 | NM_023502    | chr3  | 51410311 | 51410919 |
|   | 10 | 51360225 | 51376432 | NM_177306    | chr10 | 51370221 | 51371028 |
|   | 10 | 51163073 | 51171593 | NM_008147    | chr10 | 51166263 | 51166872 |
|   | 14 | 50955561 | 50964060 | NM_001001808 | chr14 | 50957402 | 50958013 |
|   | 11 | 50806443 | 50814942 | NM_146910    | chr11 | 50811973 | 50812625 |
|   | 19 | 50729297 | 50737796 | NM_021377    | chr19 | 50735121 | 50735722 |
|   | 11 | 50688565 | 50702746 | NM_173372    | chr11 | 50700435 | 50701031 |
|   | 18 | 50691362 | 50699873 | NM_026108    | chr18 | 50693823 | 50694490 |
|   | 11 | 50668655 | 50677154 | NM_013922    | chr11 | 50670689 | 50671469 |
|   | 13 | 50473804 | 50482303 | NM_001033400 | chr13 | 50480485 | 50481128 |
|   | 13 | 50424374 | 50432873 | BC040428     | chr13 | 50425241 | 50425864 |
|   | 9  | 50278372 | 50286880 | NM_011220    | chr9  | 50282735 | 50283341 |
|   | 11 | 50272035 | 50280534 | NM_172557    | chr11 | 50275728 | 50276327 |
|   | 8  | 50171008 | 50179507 | NM_011857    | chr8  | 50173058 | 50173713 |
|   | 2  | 49944378 | 49952877 | NM_177139    | chr2  | 49946373 | 49946955 |
| X |    | 49913453 | 49921957 | NM_029142    | chrX  | 49918316 | 49918996 |
| X |    | 49862536 | 49871035 | NM_001018063 | chrX  | 49869310 | 49870051 |
|   | 14 | 49860457 | 49869014 | NM_013632    | chr14 | 49865955 | 49866758 |
| X |    | 49862536 | 49871035 | NM_001018063 | chrX  | 49861911 | 49862896 |
| X |    | 49796549 | 49805160 | NM_028375    | chrX  | 49801211 | 49801958 |
|   | 11 | 49684177 | 49700135 | NM_016961    | chr11 | 49692876 | 49693667 |
| X |    | 49673545 | 49682130 | NM_175147    | chrX  | 49679150 | 49679959 |
|   | 7  | 49640367 | 49648899 | NM_133740    | chr7  | 49642801 | 49643398 |
|   | 13 | 49550424 | 49566082 | NM_025711    | chr13 | 49556475 | 49557460 |
|   | 11 | 49331958 | 49340457 | NM_001011805 | chr11 | 49333832 | 49334491 |
|   | 11 | 49281276 | 49293289 | NM_146467    | chr11 | 49288192 | 49288578 |
|   | 11 | 49267850 | 49276349 | NM_147066    | chr11 | 49274852 | 49275444 |
| X |    | 49226705 | 49235328 | NM_013556    | chrX  | 49233363 | 49233926 |
|   | 11 | 49177957 | 49186456 | NM_147065    | chr11 | 49185159 | 49185705 |
|   | 1  | 49174800 | 49191660 | NM_001002792 | chr1  | 49184748 | 49185538 |
| X |    | 49150867 | 49159434 | NM_027642    | chrX  | 49155005 | 49155602 |
|   | 11 | 49117573 | 49126072 | NM_146471    | chr11 | 49122058 | 49122668 |
|   | 8  | 49026509 | 49035025 | NM_203507    | chr8  | 49032283 | 49032887 |
|   | 8  | 49029788 | 49038287 | NM_177240    | chr8  | 49032283 | 49032887 |
|   | 6  | 48910447 | 48919075 | NM_172888    | chr6  | 48917347 | 48917963 |
|   | 6  | 48910447 | 48919075 | NM_172888    | chr6  | 48915294 | 48915996 |
| X |    | 48856042 | 48864548 | NM_016697    | chrX  | 48858005 | 48859080 |
|   | 9  | 48714255 | 48722922 | NM_020274    | chr9  | 48716296 | 48716901 |
|   | 7  | 48709173 | 48722054 | NM_013808    | chr7  | 48716215 | 48717055 |
|   | 6  | 48478538 | 48487037 | NM_177736    | chr6  | 48486302 | 48486848 |
| X |    | 48407051 | 48415879 | NM_008150    | chrX  | 48411632 | 48412227 |

|   |    |          |          |              |       |          |          |
|---|----|----------|----------|--------------|-------|----------|----------|
| X |    | 48407051 | 48415879 | NM_008150    | chrX  | 48410334 | 48411033 |
|   | 9  | 48230015 | 48238578 | NM_024233    | chr9  | 48231831 | 48232425 |
| X |    | 48213175 | 48223399 | BC109337     | chrX  | 48216944 | 48217885 |
|   | 18 | 48164666 | 48174573 | NM_001025388 | chr18 | 48172284 | 48173363 |
| X |    | 48035511 | 48048380 | NM_031388    | chrX  | 48042066 | 48043082 |
|   | 14 | 47985776 | 47994618 | NM_207214    | chr14 | 47991990 | 47992907 |
| X |    | 47922597 | 47932229 | NM_001077202 | chrX  | 47931065 | 47931712 |
|   | 7  | 47893120 | 47901623 | NM_207540    | chr7  | 47900663 | 47901294 |
|   | 6  | 47844272 | 47852780 | NM_145576    | chr6  | 47848617 | 47849256 |
|   | 6  | 47740491 | 47751276 | NM_009787    | chr6  | 47741346 | 47742073 |
|   | 6  | 47522014 | 47530606 | NM_007971    | chr6  | 47526417 | 47527171 |
|   | 18 | 47491104 | 47500199 | NM_018744    | chr18 | 47499578 | 47500182 |
|   | 18 | 47491104 | 47500199 | NM_018744    | chr18 | 47495912 | 47496537 |
| X |    | 47447960 | 47456617 | NM_134163    | chrX  | 47451456 | 47452187 |
| X |    | 47406757 | 47415256 | AF466292     | chrX  | 47410408 | 47411226 |
| X |    | 47080063 | 47088562 | NM_133729    | chrX  | 47087789 | 47088522 |
|   | 7  | 46873732 | 46882231 | NM_175318    | chr7  | 46875060 | 46875741 |
| X |    | 46668710 | 46677209 | NM_146292    | chrX  | 46671035 | 46671635 |
|   | 4  | 46504382 | 46512928 | NM_053179    | chr4  | 46506020 | 46506993 |
|   | 4  | 46466199 | 46474726 | NM_130889    | chr4  | 46469811 | 46470454 |
|   | 18 | 46335233 | 46343856 | NM_178872    | chr18 | 46337713 | 46338307 |
|   | 9  | 46013603 | 46026677 | NM_080434    | chr9  | 46020147 | 46020783 |
|   | 11 | 46007283 | 46015782 | NM_172524    | chr11 | 46009241 | 46009858 |
|   | 13 | 45973430 | 45981948 | NM_009124    | chr13 | 45975727 | 45976339 |
| X |    | 45970127 | 45978626 | NM_207631    | chrX  | 45973590 | 45974227 |
| X |    | 45922131 | 45930630 | NM_207240    | chrX  | 45922590 | 45923339 |
|   | 17 | 45898319 | 45916403 | NM_144856    | chr17 | 45903475 | 45904078 |
|   | 4  | 45864060 | 45872632 | NM_028788    | chr4  | 45864531 | 45865121 |
|   | 17 | 45786489 | 45797245 | NM_145140    | chr17 | 45787936 | 45788572 |
|   | 9  | 45703473 | 45712242 | NM_172257    | chr9  | 45704366 | 45704987 |
|   | 7  | 45580113 | 45591761 | NM_001033170 | chr7  | 45583439 | 45584317 |
|   | 7  | 45580199 | 45599855 | NM_020011    | chr7  | 45583439 | 45584317 |
|   | 7  | 45562009 | 45575825 | NM_016974    | chr7  | 45569109 | 45570053 |
|   | 9  | 45543085 | 45551584 | BC027092     | chr9  | 45550347 | 45550863 |
| X |    | 45530344 | 45538869 | NM_145951    | chrX  | 45535777 | 45536473 |
|   | 7  | 45531851 | 45540436 | NM_018876    | chr7  | 45534237 | 45534944 |
|   | 13 | 45512429 | 45520981 | NM_025508    | chr13 | 45514463 | 45515116 |
|   | 7  | 45479648 | 45512317 | NM_028544    | chr7  | 45492645 | 45493224 |
|   | 3  | 45468806 | 45477868 | NM_011043    | chr3  | 45476794 | 45477384 |
|   | 4  | 45423403 | 45435861 | NM_001009949 | chr4  | 45428154 | 45428958 |
|   | 4  | 45339200 | 45347699 | NM_025513    | chr4  | 45340066 | 45340846 |
|   | 7  | 45070435 | 45088638 | NM_201374    | chr7  | 45085143 | 45085805 |
|   | 7  | 45077795 | 45087752 | NM_011565    | chr7  | 45085143 | 45085805 |
|   | 7  | 45070435 | 45088638 | NM_201374    | chr7  | 45079075 | 45079673 |
|   | 7  | 45077795 | 45087752 | NM_011565    | chr7  | 45079075 | 45079673 |
|   | 7  | 44989923 | 45018697 | NM_013520    | chr7  | 45003049 | 45003676 |
|   | 17 | 44894603 | 44903318 | NM_152810    | chr17 | 44898981 | 44899648 |

|   |    |          |          |              |       |          |          |
|---|----|----------|----------|--------------|-------|----------|----------|
|   | 9  | 44862873 | 44871375 | NM_001014761 | chr9  | 44869339 | 44870181 |
| X |    | 44862205 | 44871123 | NM_011398    | chrX  | 44867527 | 44868137 |
|   | 4  | 44771668 | 44780255 | NM_177027    | chr4  | 44774601 | 44775275 |
| X |    | 44755517 | 44764053 | NM_012019    | chrX  | 44757853 | 44758405 |
| X |    | 44758097 | 44766663 | NM_011228    | chrX  | 44757853 | 44758405 |
|   | 7  | 44735207 | 44743830 | NM_133949    | chr7  | 44736555 | 44737177 |
|   | 7  | 44711269 | 44727885 | NM_026270    | chr7  | 44718174 | 44718994 |
|   | 7  | 44714622 | 44723121 | NM_001042655 | chr7  | 44718174 | 44718994 |
|   | 14 | 44542568 | 44551067 | BC043475     | chr14 | 44548879 | 44549477 |
| X |    | 44450678 | 44459505 | NM_172465    | chrX  | 44453374 | 44454452 |
| X |    | 44450678 | 44459505 | NM_172465    | chrX  | 44451509 | 44452572 |
|   | 16 | 44414042 | 44422541 | BC056138     | chr16 | 44421147 | 44421783 |
| X |    | 44385154 | 44393668 | NM_028773    | chrX  | 44391970 | 44392555 |
| X |    | 44385154 | 44393668 | NM_028773    | chrX  | 44386543 | 44387382 |
|   | 7  | 44358713 | 44367212 | BC049752     | chr7  | 44360619 | 44361206 |
|   | 7  | 44327477 | 44338692 | NM_026690    | chr7  | 44332514 | 44333329 |
|   | 7  | 44327477 | 44338692 | NM_026690    | chr7  | 44329852 | 44330600 |
|   | 7  | 44304529 | 44313028 | NM_198250    | chr7  | 44305776 | 44306402 |
|   | 9  | 44244131 | 44262370 | NM_030256    | chr9  | 44256216 | 44256808 |
|   | 19 | 44243185 | 44251753 | NM_181422    | chr19 | 44246786 | 44247459 |
|   | 4  | 44186053 | 44195439 | NM_001038993 | chr4  | 44191900 | 44192487 |
|   | 1  | 44160921 | 44169477 | NM_207281    | chr1  | 44160970 | 44161586 |
|   | 18 | 44147200 | 44155699 | NM_001039218 | chr18 | 44155635 | 44156255 |
|   | 14 | 44138648 | 44148205 | NM_172597    | chr14 | 44146050 | 44146654 |
|   | 1  | 44086393 | 44095096 | NM_011729    | chr1  | 44086402 | 44087262 |
|   | 9  | 44071840 | 44088215 | NM_007875    | chr9  | 44084168 | 44084776 |
|   | 16 | 43806477 | 43815008 | NM_029128    | chr16 | 43814476 | 43814863 |
|   | 19 | 43800309 | 43808923 | NM_025530    | chr19 | 43804005 | 43804745 |
|   | 19 | 43803772 | 43812292 | NM_144874    | chr19 | 43804005 | 43804745 |
|   | 5  | 43797836 | 43806335 | NM_175425    | chr5  | 43798735 | 43799340 |
|   | 19 | 43716786 | 43725285 | BC023172     | chr19 | 43724633 | 43725227 |
|   | 4  | 43679020 | 43687542 | BC092136     | chr4  | 43686866 | 43687724 |
|   | 4  | 43687453 | 43695959 | NM_175517    | chr4  | 43686866 | 43687724 |
|   | 19 | 43659636 | 43668135 | NM_008699    | chr19 | 43662970 | 43663575 |
|   | 4  | 43577734 | 43586277 | NM_013497    | chr4  | 43579472 | 43580295 |
|   | 2  | 43564833 | 43573378 | NM_153820    | chr2  | 43572094 | 43572683 |
|   | 16 | 43421595 | 43432139 | NM_019778    | chr16 | 43427036 | 43427634 |
|   | 16 | 43421595 | 43432139 | NM_019778    | chr16 | 43421848 | 43422436 |
|   | 6  | 43236658 | 43245169 | NM_130869    | chr6  | 43236683 | 43237280 |
|   | 6  | 43125253 | 43133752 | NM_146653    | chr6  | 43130658 | 43131276 |
|   | 19 | 42609862 | 42618361 | BC038935     | chr19 | 42611349 | 42612132 |
|   | 8  | 42538089 | 42546747 | NM_001005865 | chr8  | 42539631 | 42540486 |
|   | 13 | 42306448 | 42315355 | NM_010104    | chr13 | 42313835 | 42314417 |
|   | 10 | 42164330 | 42172830 | NM_145743    | chr10 | 42168194 | 42168692 |
|   | 11 | 42023224 | 42032353 | NM_010250    | chr11 | 42027324 | 42027938 |
|   | 8  | 42004600 | 42013184 | NM_033560    | chr8  | 42005944 | 42006546 |
|   | 8  | 42006488 | 42016561 | NM_011135    | chr8  | 42005944 | 42006546 |



|   |    |          |                       |       |          |          |
|---|----|----------|-----------------------|-------|----------|----------|
|   | 4  | 41938014 | 41953390 NM_010549    | chr4  | 41952760 | 41953347 |
|   | 4  | 41689229 | 41702435 NM_028624    | chr4  | 41693926 | 41694524 |
|   | 4  | 41689229 | 41702435 NM_028624    | chr4  | 41691013 | 41691928 |
|   | 6  | 41529175 | 41545324 NM_007680    | chr6  | 41533540 | 41534174 |
|   | 10 | 41495784 | 41504290 NM_026643    | chr10 | 41502462 | 41503112 |
|   | 10 | 41125387 | 41141349 NM_153398    | chr10 | 41138719 | 41139326 |
|   | 6  | 41102048 | 41110547 M16120       | chr6  | 41106942 | 41107461 |
|   | 19 | 41076586 | 41085232 NM_009345    | chr19 | 41084180 | 41084786 |
|   | 6  | 41064795 | 41073294 BC030075     | chr6  | 41070657 | 41071287 |
|   | 13 | 40742273 | 40751894 NM_011547    | chr13 | 40743683 | 40744293 |
|   | 12 | 40642107 | 40650613 NM_009132    | chr12 | 40642387 | 40643011 |
| X |    | 40610470 | 40618969 NM_175539    | chrX  | 40612927 | 40613563 |
|   | 11 | 40594916 | 40604709 NM_009831    | chr11 | 40595118 | 40595725 |
|   | 6  | 40540418 | 40548917 NM_001001451 | chr6  | 40545927 | 40546542 |
|   | 19 | 40322319 | 40330844 NM_016861    | chr19 | 40325149 | 40326023 |
|   | 6  | 40249102 | 40257614 NM_023538    | chr6  | 40249918 | 40250746 |
|   | 9  | 40094362 | 40102861 BC070451     | chr9  | 40098306 | 40098918 |
|   | 9  | 40013788 | 40023048 NM_178227    | chr9  | 40015531 | 40015871 |
|   | 17 | 39774054 | 39788691 NM_009638    | chr17 | 39788082 | 39788559 |
|   | 10 | 39767727 | 39776226 BC052877     | chr10 | 39773020 | 39773617 |
|   | 10 | 39767727 | 39776226 BC052877     | chr10 | 39771830 | 39772484 |
|   | 9  | 39749322 | 39763600 NM_147108    | chr9  | 39756355 | 39757005 |
|   | 9  | 39413630 | 39422129 NM_001011827 | chr9  | 39416710 | 39417310 |
|   | 9  | 39298941 | 39307440 NM_146330    | chr9  | 39300553 | 39301140 |
|   | 7  | 39184821 | 39193364 NM_177890    | chr7  | 39184867 | 39185942 |
| X |    | 38741189 | 38749796 NM_011364    | chrX  | 38745381 | 38746069 |
|   | 2  | 38530297 | 38542513 NM_139051    | chr2  | 38536962 | 38537641 |
|   | 2  | 38530297 | 38542513 NM_139051    | chr2  | 38532942 | 38533666 |
|   | 9  | 38406462 | 38430052 NM_146375    | chr9  | 38423110 | 38423873 |
| X |    | 38332355 | 38340854 NM_009688    | chrX  | 38332585 | 38333199 |
|   | 2  | 38327706 | 38336322 NM_021606    | chr2  | 38331557 | 38332176 |
|   | 13 | 38197950 | 38214932 NM_026382    | chr13 | 38197761 | 38198661 |
|   | 5  | 38110119 | 38118834 NM_010835    | chr5  | 38110592 | 38111204 |
|   | 2  | 38106885 | 38115393 NM_146122    | chr2  | 38108575 | 38109402 |
|   | 13 | 38038748 | 38047260 NM_024242    | chr13 | 38044469 | 38045071 |
|   | 13 | 38042036 | 38050535 NM_027724    | chr13 | 38044469 | 38045071 |
|   | 6  | 38032961 | 38041468 BC119477     | chr6  | 38040138 | 38040751 |
|   | 6  | 38036658 | 38045157 BC046979     | chr6  | 38040138 | 38040751 |
|   | 5  | 38002813 | 38011388 NM_022416    | chr5  | 38005711 | 38006404 |
|   | 3  | 37913410 | 37922039 NM_198657    | chr3  | 37914110 | 37914762 |
|   | 7  | 37886374 | 37900191 NM_028166    | chr7  | 37893764 | 37894356 |
|   | 1  | 37858540 | 37867039 NM_001033427 | chr1  | 37859717 | 37860318 |
|   | 18 | 37794309 | 37822874 NM_033586    | chr18 | 37815211 | 37815798 |
|   | 9  | 37791795 | 37800294 NM_001011798 | chr9  | 37798662 | 37799440 |
|   | 18 | 37776379 | 37790418 NM_033585    | chr18 | 37784000 | 37784582 |
|   | 18 | 37776405 | 37784904 BC082294     | chr18 | 37784000 | 37784582 |
|   | 17 | 37661145 | 37669644 NM_146327    | chr17 | 37668534 | 37669240 |

|   |    |          |                       |       |          |          |
|---|----|----------|-----------------------|-------|----------|----------|
|   | 17 | 37669226 | 37677725 NM_146487    | chr17 | 37668534 | 37669240 |
|   | 9  | 37662219 | 37670720 NM_146798    | chr9  | 37666998 | 37667601 |
|   | 17 | 37661145 | 37669644 NM_146327    | chr17 | 37663576 | 37664342 |
| X |    | 37639983 | 37648640 NM_016886    | chrX  | 37647423 | 37648554 |
|   | 18 | 37633626 | 37646832 NM_053147    | chr18 | 37646062 | 37646676 |
|   | 18 | 37633626 | 37646832 NM_053147    | chr18 | 37639724 | 37640343 |
|   | 18 | 37593514 | 37632802 NM_053143    | chr18 | 37624573 | 37625160 |
|   | 5  | 37620736 | 37629256 NM_145920    | chr5  | 37623984 | 37624624 |
|   | 5  | 37622611 | 37631115 NM_021292    | chr5  | 37623984 | 37624624 |
|   | 12 | 37612812 | 37621412 NM_008584    | chr12 | 37619073 | 37619864 |
|   | 18 | 37541392 | 37549891 NM_053136    | chr18 | 37546031 | 37546385 |
|   | 5  | 37524329 | 37536767 NM_007765    | chr5  | 37525081 | 37525471 |
|   | 3  | 37501448 | 37509995 NM_145825    | chr3  | 37504243 | 37504840 |
|   | 3  | 37504615 | 37513856 NM_001008502 | chr3  | 37504243 | 37504840 |
|   | 18 | 37475245 | 37483744 NM_053133    | chr18 | 37481441 | 37482359 |
|   | 7  | 37476013 | 37487517 NM_172385    | chr7  | 37477863 | 37478607 |
|   | 17 | 37436964 | 37445463 NM_146290    | chr17 | 37445078 | 37445508 |
|   | 18 | 37414814 | 37435955 NM_053128    | chr18 | 37428303 | 37429025 |
|   | 17 | 37407122 | 37415621 NM_147062    | chr17 | 37411006 | 37411728 |
|   | 2  | 37399351 | 37407850 NM_176932    | chr2  | 37405006 | 37405615 |
|   | 13 | 37346811 | 37355351 NM_010745    | chr13 | 37352889 | 37353808 |
|   | 17 | 37350919 | 37359418 NM_146629    | chr17 | 37351974 | 37352573 |
|   | 17 | 37265885 | 37274384 NM_207155    | chr17 | 37266355 | 37266970 |
|   | 2  | 37242406 | 37258872 NM_146253    | chr2  | 37254197 | 37254797 |
|   | 17 | 37216309 | 37224808 NM_001011753 | chr17 | 37218036 | 37218628 |
|   | 3  | 37194042 | 37205625 BC079623     | chr3  | 37200401 | 37201147 |
|   | 5  | 37150819 | 37159318 NM_172994    | chr5  | 37158928 | 37159286 |
|   | 9  | 37111277 | 37119776 NM_175189    | chr9  | 37117574 | 37118546 |
|   | 18 | 37087605 | 37102275 NM_001003672 | chr18 | 37094401 | 37095012 |
|   | 17 | 36942784 | 36951283 NM_146833    | chr17 | 36945708 | 36946300 |
|   | 12 | 36885785 | 36894447 NM_178629    | chr12 | 36890396 | 36891077 |
|   | 18 | 36880213 | 36890541 NM_026464    | chr18 | 36884903 | 36885595 |
|   | 12 | 36818492 | 36827014 NM_025312    | chr12 | 36820338 | 36820924 |
|   | 19 | 36796991 | 36807797 NM_016854    | chr19 | 36802007 | 36802941 |
|   | 18 | 36784034 | 36792655 NM_201256    | chr18 | 36790944 | 36791550 |
|   | 18 | 36784034 | 36792655 NM_201256    | chr18 | 36784819 | 36785651 |
|   | 16 | 36741646 | 36750146 NM_177128    | chr16 | 36747301 | 36748524 |
|   | 16 | 36744945 | 36753498 BC004721     | chr16 | 36747301 | 36748524 |
|   | 17 | 36717534 | 36726033 NM_146456    | chr17 | 36719726 | 36720501 |
|   | 9  | 36514767 | 36523325 NM_008408    | chr9  | 36515959 | 36516571 |
|   | 17 | 36495599 | 36504098 NM_001033235 | chr17 | 36496861 | 36497786 |
|   | 13 | 36118876 | 36127848 NM_024274    | chr13 | 36125771 | 36126429 |
|   | 13 | 36122198 | 36130822 NM_201358    | chr13 | 36125771 | 36126429 |
|   | 1  | 36006946 | 36015454 NM_015818    | chr1  | 36006976 | 36007314 |
|   | 18 | 35978507 | 35987006 BC016207     | chr18 | 35983355 | 35983964 |
|   | 16 | 35954937 | 35963438 NM_027113    | chr16 | 35960440 | 35961039 |
|   | 2  | 35952663 | 35961175 NM_026422    | chr2  | 35959149 | 35959943 |

|   |    |          |          |              |       |          |          |
|---|----|----------|----------|--------------|-------|----------|----------|
|   | 2  | 35956108 | 35964620 | NM_026434    | chr2  | 35959149 | 35959943 |
|   | 17 | 35931704 | 35940203 | NM_013544    | chr17 | 35935354 | 35935961 |
|   | 17 | 35773746 | 35782249 | NM_001025208 | chr17 | 35775001 | 35776095 |
|   | 17 | 35747328 | 35755827 | BC092081     | chr17 | 35752723 | 35753379 |
|   | 8  | 35617093 | 35625643 | NM_026432    | chr8  | 35621997 | 35622671 |
|   | 2  | 35508003 | 35521240 | NM_001001602 | chr2  | 35511591 | 35512328 |
|   | 16 | 35455109 | 35463817 | NM_013661    | chr16 | 35459482 | 35460129 |
|   | 5  | 35352417 | 35360948 | NM_019447    | chr5  | 35358141 | 35358740 |
|   | 6  | 35235756 | 35244278 | NM_172892    | chr6  | 35243376 | 35244158 |
|   | 9  | 35195747 | 35204247 | NM_021339    | chr9  | 35201122 | 35201759 |
|   | 17 | 34922458 | 34931099 | NM_010390    | chr17 | 34928949 | 34929988 |
|   | 14 | 34918406 | 34926953 | NM_175008    | chr14 | 34923041 | 34923651 |
|   | 6  | 34905652 | 34914151 | NM_001025573 | chr6  | 34908809 | 34909406 |
| X |    | 34877181 | 34885736 | NM_021550    | chrX  | 34882793 | 34883355 |
| X |    | 34877181 | 34885736 | NM_021550    | chrX  | 34881474 | 34882184 |
|   | 17 | 34768605 | 34790057 | NM_020027    | chr17 | 34774767 | 34775391 |
|   | 17 | 34618635 | 34627134 | NM_138582    | chr17 | 34624691 | 34625432 |
|   | 15 | 34620794 | 34629801 | NM_145469    | chr15 | 34621784 | 34622492 |
|   | 16 | 34564958 | 34573457 | NM_030744    | chr16 | 34569163 | 34569742 |
|   | 17 | 34533370 | 34541934 | NM_010893    | chr17 | 34539926 | 34540914 |
|   | 5  | 34306841 | 34316259 | NM_001001985 | chr5  | 34314404 | 34314996 |
|   | 19 | 34277621 | 34288682 | AB066213     | chr19 | 34278444 | 34279187 |
| X |    | 34143837 | 34152397 | NM_023894    | chrX  | 34144711 | 34145371 |
| X |    | 34143837 | 34152397 | NM_023894    | chrX  | 34143371 | 34144367 |
|   | 13 | 34135320 | 34143819 | NM_023716    | chr13 | 34135623 | 34136219 |
|   | 13 | 34082952 | 34091453 | NM_009450    | chr13 | 34087743 | 34088336 |
| X |    | 34065674 | 34078812 | NM_001025086 | chrX  | 34067292 | 34068160 |
|   | 17 | 33978867 | 33987366 | NM_201405    | chr17 | 33985328 | 33985899 |
| X |    | 33965142 | 33979333 | NM_001040089 | chrX  | 33978122 | 33978716 |
| X |    | 33965142 | 33979333 | NM_001040089 | chrX  | 33969329 | 33970270 |
| X |    | 33857369 | 33865906 | NM_201236    | chrX  | 33863520 | 33864611 |
| X |    | 33857369 | 33865906 | NM_201236    | chrX  | 33862059 | 33862747 |
|   | 17 | 33802583 | 33817290 | NM_011530    | chr17 | 33815204 | 33815837 |
| X |    | 33814492 | 33822991 | NM_001039695 | chrX  | 33814445 | 33815069 |
| X |    | 33690820 | 33699404 | NM_001039688 | chrX  | 33697370 | 33697976 |
| X |    | 33690820 | 33699404 | NM_001039688 | chrX  | 33696442 | 33697240 |
| X |    | 33690820 | 33699404 | NM_001039688 | chrX  | 33695448 | 33696208 |
| X |    | 33670437 | 33683863 | NM_194063    | chrX  | 33680785 | 33681813 |
| X |    | 33639987 | 33648486 | NM_001033234 | chrX  | 33646818 | 33647548 |
| X |    | 33639987 | 33648486 | NM_001033234 | chrX  | 33640562 | 33641638 |
|   | 17 | 33631887 | 33648012 | NM_009066    | chr17 | 33638982 | 33639577 |
|   | 17 | 33636306 | 33652390 | NM_009926    | chr17 | 33638982 | 33639577 |
| X |    | 33616726 | 33625287 | NM_153503    | chrX  | 33623212 | 33624262 |
| X |    | 33620093 | 33628683 | NM_019443    | chrX  | 33623212 | 33624262 |
|   | 1  | 33611802 | 33620326 | NM_008922    | chr1  | 33615352 | 33616135 |
|   | 17 | 33605710 | 33616743 | NM_019909    | chr17 | 33608111 | 33608889 |
| X |    | 33474290 | 33482791 | NM_173779    | chrX  | 33481938 | 33482599 |

|   |    |          |          |              |       |          |          |
|---|----|----------|----------|--------------|-------|----------|----------|
| X |    | 33474290 | 33482791 | NM_173779    | chrX  | 33478419 | 33479066 |
| X |    | 33474290 | 33482791 | NM_173779    | chrX  | 33477219 | 33477977 |
|   | 17 | 33410632 | 33433084 | NM_030697    | chr17 | 33428945 | 33429542 |
|   | 17 | 33428034 | 33436533 | BC125644     | chr17 | 33428945 | 33429542 |
|   | 5  | 33415076 | 33423607 | NM_019810    | chr5  | 33421747 | 33422756 |
| X |    | 33418391 | 33426926 | NM_019942    | chrX  | 33419292 | 33420175 |
| X |    | 33331845 | 33340344 | NM_029891    | chrX  | 33335098 | 33336459 |
|   | 5  | 33329737 | 33338383 | NM_011738    | chr5  | 33334392 | 33335287 |
|   | 10 | 33311517 | 33320023 | NM_175448    | chr10 | 33311720 | 33312334 |
| X |    | 33303061 | 33311560 | BC021479     | chrX  | 33309121 | 33309728 |
|   | 18 | 33300813 | 33309312 | M64266       | chr18 | 33305830 | 33306471 |
|   | 4  | 33186703 | 33195202 | AY026320     | chr4  | 33192002 | 33192605 |
|   | 2  | 33031970 | 33040469 | NM_011923    | chr2  | 33038795 | 33039429 |
|   | 13 | 33006006 | 33016496 | NM_009256    | chr13 | 33006431 | 33007022 |
|   | 18 | 32989941 | 33000288 | BC021497     | chr18 | 32996262 | 32996866 |
|   | 14 | 32979082 | 32987581 | NM_008919    | chr14 | 32982268 | 32982969 |
|   | 4  | 32928496 | 32936995 | NM_010289    | chr4  | 32930899 | 32931524 |
|   | 3  | 32922611 | 32931118 | NM_025316    | chr3  | 32922862 | 32923509 |
|   | 14 | 32909074 | 32917616 | NM_013473    | chr14 | 32912039 | 32912772 |
|   | 3  | 32791191 | 32799690 | M87286       | chr3  | 32797408 | 32798003 |
| X |    | 32621395 | 32630741 | NM_028325    | chrX  | 32625001 | 32625589 |
|   | 19 | 32530055 | 32538572 | NM_011292    | chr19 | 32532848 | 32533547 |
|   | 2  | 32351341 | 32360615 | NM_153560    | chr2  | 32356112 | 32356751 |
|   | 19 | 32166638 | 32180146 | NM_018830    | chr19 | 32179092 | 32179777 |
|   | 11 | 32165115 | 32173707 | NM_181569    | chr11 | 32169113 | 32169931 |
|   | 11 | 32165771 | 32189466 | NM_001033981 | chr11 | 32169113 | 32169931 |
|   | 15 | 32115876 | 32124375 | NM_020503    | chr15 | 32116646 | 32117231 |
|   | 5  | 31971692 | 31980208 | NM_153196    | chr5  | 31978458 | 31979228 |
|   | 5  | 31971692 | 31980208 | NM_153196    | chr5  | 31977816 | 31978405 |
|   | 2  | 31790490 | 31799001 | BC039282     | chr2  | 31797950 | 31798547 |
|   | 5  | 31723042 | 31731594 | NM_172993    | chr5  | 31723843 | 31724770 |
|   | 18 | 31587721 | 31596425 | NM_009308    | chr18 | 31591607 | 31592308 |
|   | 15 | 31507494 | 31516000 | NM_181588    | chr15 | 31510044 | 31510483 |
|   | 18 | 31457539 | 31466138 | NM_009065    | chr18 | 31457986 | 31458617 |
|   | 2  | 31431187 | 31439686 | BC110694     | chr2  | 31432306 | 31433156 |
|   | 14 | 31422936 | 31431435 | NM_001001796 | chr14 | 31431432 | 31432108 |
|   | 14 | 31424628 | 31433127 | NM_177134    | chr14 | 31431432 | 31432108 |
|   | 5  | 31319240 | 31333891 | NM_023525    | chr5  | 31328157 | 31328751 |
|   | 5  | 31321814 | 31331505 | NM_177870    | chr5  | 31328157 | 31328751 |
|   | 2  | 31286279 | 31294778 | NM_007494    | chr2  | 31291651 | 31292412 |
|   | 5  | 31219562 | 31228061 | BC023116     | chr5  | 31227458 | 31228061 |
|   | 5  | 31220653 | 31229152 | NM_021304    | chr5  | 31227458 | 31228061 |
|   | 10 | 31132838 | 31141337 | NM_009413    | chr10 | 31135809 | 31136440 |
|   | 16 | 30998628 | 31007127 | NM_198626    | chr16 | 31001741 | 31002375 |
|   | 5  | 30918535 | 30927043 | NM_175675    | chr5  | 30925504 | 30926166 |
|   | 2  | 30798343 | 30806842 | AF449715     | chr2  | 30804776 | 30805406 |
|   | 2  | 30801396 | 30809895 | NM_144885    | chr2  | 30804776 | 30805406 |

|    |          |                       |       |          |          |
|----|----------|-----------------------|-------|----------|----------|
| 2  | 30798343 | 30806842 AF449715     | chr2  | 30800335 | 30800940 |
| 2  | 30768981 | 30777510 NM_133673    | chr2  | 30771585 | 30772255 |
| 7  | 30562428 | 30576230 NM_001033316 | chr7  | 30564461 | 30565209 |
| 16 | 30513470 | 30521969 NM_177632    | chr16 | 30515499 | 30516095 |
| 10 | 30489855 | 30498354 NM_172495    | chr10 | 30496778 | 30497397 |
| 10 | 30342706 | 30351233 BC049997     | chr10 | 30344747 | 30345683 |
| 7  | 30116548 | 30125047 NM_011662    | chr7  | 30122344 | 30122936 |
| 19 | 30063787 | 30072286 NM_025741    | chr19 | 30069633 | 30070323 |
| 7  | 29934834 | 29943333 NM_027259    | chr7  | 29941015 | 29941615 |
| 7  | 29938023 | 29950219 NM_025548    | chr7  | 29941015 | 29941615 |
| 19 | 29869505 | 29884950 NM_177721    | chr19 | 29878466 | 29879071 |
| 14 | 29702549 | 29718032 NM_018746    | chr14 | 29707576 | 29708360 |
| 14 | 29537905 | 29546404 BC066188     | chr14 | 29545535 | 29546221 |
| 5  | 29520865 | 29529364 NM_021470    | chr5  | 29521218 | 29521894 |
| 7  | 29433257 | 29441792 NM_029714    | chr7  | 29434242 | 29435010 |
| 6  | 29411793 | 29420309 NM_025381    | chr6  | 29417317 | 29417907 |
| 12 | 29332134 | 29340633 NM_201357    | chr12 | 29338970 | 29339596 |
| 12 | 29334151 | 29342656 NM_178811    | chr12 | 29338970 | 29339596 |
| 19 | 29311825 | 29320951 NM_008413    | chr19 | 29314993 | 29315501 |
| 17 | 29293901 | 29302400 BC060066     | chr17 | 29301313 | 29301945 |
| 2  | 29067550 | 29081015 NM_133501    | chr2  | 29076775 | 29077387 |
| 11 | 29066967 | 29075495 NM_134034    | chr11 | 29072451 | 29073047 |
| 3  | 28990509 | 28999083 NM_026517    | chr3  | 28998745 | 28999341 |
| 7  | 28988110 | 28996672 NM_011464    | chr7  | 28990991 | 28991597 |
| 8  | 28907606 | 28916105 NM_026256    | chr8  | 28912325 | 28912966 |
| 3  | 28883050 | 28891556 NM_031197    | chr3  | 28887178 | 28887650 |
| 17 | 28815439 | 28828370 NM_007669    | chr17 | 28821288 | 28822211 |
| 14 | 28791389 | 28799967 NM_019979    | chr14 | 28791952 | 28792562 |
| 2  | 28735932 | 28744677 NM_019446    | chr2  | 28743614 | 28744305 |
| 2  | 28313755 | 28338017 NM_009058    | chr2  | 28318933 | 28319540 |
| 7  | 28216621 | 28225120 NM_001024673 | chr7  | 28221970 | 28222584 |
| 2  | 28021685 | 28030396 NM_019498    | chr2  | 28029904 | 28030349 |
| 7  | 27872470 | 27881007 NM_007991    | chr7  | 27879532 | 27880168 |
| 13 | 27569538 | 27578069 NM_023332    | chr13 | 27574695 | 27575282 |
| 19 | 27491698 | 27502919 NM_177474    | chr19 | 27495207 | 27495822 |
| 7  | 27308618 | 27318595 NM_007434    | chr7  | 27309867 | 27310518 |
| 17 | 27228394 | 27236893 NM_001013385 | chr17 | 27235941 | 27236655 |
| 7  | 26871826 | 26881533 NM_053208    | chr7  | 26877105 | 26877716 |
| 17 | 26779125 | 26787624 NM_080553    | chr17 | 26785441 | 26786229 |
| 2  | 26750078 | 26758577 NM_198628    | chr2  | 26753315 | 26753948 |
| 2  | 26752881 | 26761937 NM_011512    | chr2  | 26753315 | 26753948 |
| 8  | 26476798 | 26485328 NM_027194    | chr8  | 26482747 | 26483323 |
| 8  | 26479834 | 26488450 NM_007404    | chr8  | 26482747 | 26483323 |
| 2  | 26114067 | 26122566 NM_177841    | chr2  | 26121041 | 26121677 |
| 8  | 26060055 | 26068554 NM_008324    | chr8  | 26061317 | 26061943 |
| 6  | 25753453 | 25765236 NM_133931    | chr6  | 25762311 | 25762986 |
| 19 | 25733508 | 25747302 NM_145831    | chr19 | 25742576 | 25743323 |

|    |          |          |              |       |          |          |
|----|----------|----------|--------------|-------|----------|----------|
| 16 | 25711265 | 25719790 | NM_011641    | chr16 | 25711753 | 25712389 |
| 2  | 25666758 | 25675257 | NM_001001714 | chr2  | 25674367 | 25674972 |
| 6  | 25637359 | 25646739 | NM_010338    | chr6  | 25639358 | 25640118 |
| 17 | 25597115 | 25605616 | NM_026686    | chr17 | 25604930 | 25605566 |
| 16 | 25593639 | 25602138 | AF075436     | chr16 | 25599681 | 25600349 |
| 17 | 25558009 | 25585342 | NM_145999    | chr17 | 25563408 | 25564062 |
| 17 | 25538015 | 25559180 | NM_173741    | chr17 | 25554926 | 25555580 |
| 2  | 25495275 | 25507266 | NM_178036    | chr2  | 25497802 | 25498723 |
| 7  | 25460962 | 25469510 | NM_144922    | chr7  | 25462187 | 25462806 |
| 14 | 25364425 | 25372924 | NM_032008    | chr14 | 25364516 | 25365101 |
| 2  | 25313414 | 25329728 | NM_027062    | chr2  | 25323850 | 25324572 |
| 2  | 25316787 | 25325359 | NM_013908    | chr2  | 25323850 | 25324572 |
| 2  | 25239293 | 25253182 | NM_007379    | chr2  | 25247817 | 25248410 |
| 2  | 25211912 | 25231538 | NM_009849    | chr2  | 25226678 | 25227268 |
| 17 | 25086973 | 25100728 | NM_012034    | chr17 | 25092413 | 25093459 |
| 4  | 25058049 | 25066548 | NM_030733    | chr4  | 25061132 | 25061767 |
| 13 | 25025345 | 25033844 | NM_001013389 | chr13 | 25027917 | 25028658 |
| 7  | 24587474 | 24595973 | NM_023133    | chr7  | 24589868 | 24590555 |
| 10 | 24581910 | 24590409 | BC005508     | chr10 | 24584110 | 24584867 |
| 2  | 24582662 | 24591169 | NM_007579    | chr2  | 24583023 | 24583629 |
| 13 | 24418364 | 24426864 | NM_007717    | chr13 | 24423835 | 24424440 |
| 18 | 24160831 | 24169820 | NM_021559    | chr18 | 24167915 | 24168530 |
| 1  | 24125975 | 24134496 | NM_007740    | chr1  | 24130288 | 24130890 |
| 5  | 23983818 | 23992317 | BC031173     | chr5  | 23991328 | 23991964 |
| 18 | 23940994 | 23949557 | NM_153058    | chr18 | 23946845 | 23947462 |
| 10 | 23906933 | 23915432 | NM_021509    | chr10 | 23913661 | 23914263 |
| 16 | 23901462 | 23909982 | NM_009744    | chr16 | 23904507 | 23905284 |
| 13 | 23840925 | 23849593 | NM_134069    | chr13 | 23843005 | 23843543 |
| 13 | 23740272 | 23773659 | NM_015786    | chr13 | 23762082 | 23762906 |
| 13 | 23761456 | 23775851 | NM_013550    | chr13 | 23762082 | 23762906 |
| 1  | 23710201 | 23718808 | NM_172124    | chr1  | 23717553 | 23718222 |
| 10 | 23632974 | 23641473 | NM_001008429 | chr10 | 23636286 | 23637041 |
| 7  | 23596289 | 23604788 | NM_206868    | chr7  | 23602318 | 23602985 |
| 11 | 23559674 | 23568668 | NM_028304    | chr11 | 23561314 | 23561899 |
| 13 | 23545430 | 23554016 | NM_013548    | chr13 | 23550865 | 23551653 |
| 13 | 23548325 | 23565111 | NM_178197    | chr13 | 23550865 | 23551653 |
| 10 | 23474117 | 23482616 | NM_011295    | chr10 | 23474036 | 23474534 |
| 7  | 23361076 | 23369575 | NM_030735    | chr7  | 23365193 | 23365770 |
| 16 | 23338467 | 23346966 | NM_001004151 | chr16 | 23339881 | 23340480 |
| 8  | 23166691 | 23175192 | NM_001007582 | chr8  | 23170727 | 23171372 |
| 10 | 23036804 | 23046202 | NM_010167    | chr10 | 23040064 | 23040773 |
| 17 | 22903662 | 22912161 | D10632       | chr17 | 22907960 | 22908556 |
| 14 | 22790258 | 22799412 | NM_010610    | chr14 | 22791119 | 22792054 |
| 11 | 22734698 | 22743197 | AF092050     | chr11 | 22738589 | 22739345 |
| 13 | 22626001 | 22634500 | NM_134216    | chr13 | 22633297 | 22633885 |
| 2  | 22620027 | 22628578 | NM_019456    | chr2  | 22625235 | 22626118 |
| 2  | 22620027 | 22628578 | NM_019456    | chr2  | 22623696 | 22624768 |

|   |    |          |          |              |       |          |          |
|---|----|----------|----------|--------------|-------|----------|----------|
|   | 13 | 22476083 | 22484582 | NM_134221    | chr13 | 22480739 | 22481466 |
|   | 13 | 22089343 | 22097842 | NM_145850    | chr13 | 22093310 | 22093915 |
|   | 13 | 22037352 | 22053194 | NM_175665    | chr13 | 22042300 | 22042905 |
|   | 13 | 22040518 | 22056414 | NM_175656    | chr13 | 22042300 | 22042905 |
|   | 9  | 21970173 | 21978672 | NM_172763    | chr9  | 21973511 | 21974192 |
|   | 4  | 21812536 | 21821108 | NM_016746    | chr4  | 21819930 | 21820785 |
|   | 19 | 21741733 | 21750232 | BC032261     | chr19 | 21746499 | 21747050 |
|   | 13 | 21717877 | 21732062 | NM_178206    | chr13 | 21723915 | 21724586 |
|   | 13 | 21721109 | 21735596 | NM_178199    | chr13 | 21723915 | 21724586 |
|   | 9  | 21544100 | 21554937 | NM_145611    | chr9  | 21546483 | 21547063 |
|   | 11 | 21466284 | 21474820 | NM_145425    | chr11 | 21471158 | 21471745 |
|   | 11 | 21469304 | 21477833 | NM_008618    | chr11 | 21471158 | 21471745 |
|   | 2  | 21279321 | 21287820 | NM_001004761 | chr2  | 21284302 | 21284989 |
|   | 11 | 21267962 | 21277204 | NM_139297    | chr11 | 21272152 | 21272768 |
|   | 5  | 21210670 | 21219191 | NM_178728    | chr5  | 21215112 | 21215744 |
|   | 5  | 21210670 | 21219191 | NM_178728    | chr5  | 21210981 | 21211412 |
|   | 13 | 21078265 | 21086764 | NM_146535    | chr13 | 21081236 | 21081898 |
|   | 11 | 20728561 | 20737070 | NM_173752    | chr11 | 20728941 | 20729533 |
|   | 18 | 20647284 | 20655813 | NM_030596    | chr18 | 20649275 | 20649746 |
|   | 18 | 20255121 | 20263783 | NM_013504    | chr18 | 20261216 | 20261668 |
|   | 3  | 20243962 | 20252492 | NM_009210    | chr3  | 20249339 | 20249924 |
| X |    | 20243689 | 20252188 | NM_183185    | chrX  | 20246702 | 20247291 |
|   | 11 | 20230088 | 20242016 | NM_018861    | chr11 | 20233853 | 20234319 |
| X |    | 20085984 | 20094483 | NM_008823    | chrX  | 20090479 | 20091079 |
| X |    | 20075356 | 20083870 | NM_013680    | chrX  | 20080878 | 20081437 |
| X |    | 20075356 | 20083870 | NM_013680    | chrX  | 20079423 | 20080105 |
| X |    | 20021125 | 20030484 | NM_001044384 | chrX  | 20029883 | 20030434 |
| X |    | 20021125 | 20030484 | NM_001044384 | chrX  | 20026375 | 20026983 |
| X |    | 20021125 | 20030484 | NM_001044384 | chrX  | 20021385 | 20021981 |
| X |    | 19999537 | 20012777 | NM_009703    | chrX  | 20008282 | 20008885 |
| X |    | 19999537 | 20012777 | NM_009703    | chrX  | 20005764 | 20006365 |
| X |    | 19999537 | 20012777 | NM_009703    | chrX  | 19999580 | 20000647 |
|   | 10 | 19891886 | 19900385 | BC046339     | chr10 | 19896359 | 19896955 |
| X |    | 19854891 | 19871598 | NM_145628    | chrX  | 19871036 | 19871560 |
| X |    | 19854891 | 19871598 | NM_145628    | chrX  | 19855966 | 19856587 |
| X |    | 19839393 | 19848220 | NM_011049    | chrX  | 19840790 | 19841496 |
| X |    | 19769154 | 19780513 | NM_019435    | chrX  | 19776149 | 19777140 |
| X |    | 19770955 | 19779454 | NM_145627    | chrX  | 19776149 | 19777140 |
|   | 14 | 19619259 | 19627773 | NM_008873    | chr14 | 19625131 | 19625854 |
| X |    | 19611486 | 19619985 | NM_199317    | chrX  | 19616918 | 19617554 |
| X |    | 19515562 | 19524066 | NM_133669    | chrX  | 19521998 | 19522595 |
|   | 3  | 19454609 | 19463108 | NM_008802    | chr3  | 19458075 | 19458828 |
|   | 14 | 19265869 | 19274492 | NM_009674    | chr14 | 19271717 | 19272313 |
|   | 19 | 18774255 | 18782783 | NM_177640    | chr19 | 18775056 | 18775742 |
|   | 13 | 18718757 | 18727263 | NM_172120    | chr13 | 18720362 | 18721007 |
| X |    | 18635779 | 18644278 | NM_207524    | chrX  | 18638970 | 18639550 |
| X |    | 18635779 | 18644278 | NM_207524    | chrX  | 18635787 | 18636508 |

|   |    |          |          |              |       |          |          |
|---|----|----------|----------|--------------|-------|----------|----------|
|   | 9  | 18619731 | 18628230 | NM_146566    | chr9  | 18624950 | 18625547 |
|   | 8  | 18589150 | 18597649 | NM_173189    | chr8  | 18597228 | 18597633 |
|   | 11 | 17851352 | 17859865 | NM_026576    | chr11 | 17851852 | 17852495 |
|   | 6  | 17687592 | 17702018 | NM_022332    | chr6  | 17692739 | 17693719 |
| X |    | 17615734 | 17624233 | NM_175228    | chrX  | 17618064 | 17618734 |
|   | 17 | 17326565 | 17335259 | NM_172827    | chr17 | 17327129 | 17327707 |
|   | 7  | 17162411 | 17170923 | NM_027210    | chr7  | 17165560 | 17166146 |
|   | 6  | 17119311 | 17127833 | NM_177689    | chr6  | 17126362 | 17127052 |
|   | 11 | 17086847 | 17095346 | BC002267     | chr11 | 17088999 | 17089936 |
|   | 17 | 17073190 | 17081708 | NM_025934    | chr17 | 17080764 | 17081670 |
|   | 14 | 17058260 | 17066902 | NM_023526    | chr14 | 17060820 | 17061416 |
|   | 12 | 16612730 | 16621250 | NM_172950    | chr12 | 16617818 | 16618654 |
|   | 1  | 16601993 | 16610500 | NM_025773    | chr1  | 16604153 | 16604777 |
| X |    | 16473763 | 16482292 | NM_028916    | chrX  | 16473876 | 16474457 |
| X |    | 16066224 | 16074723 | NM_010883    | chrX  | 16071567 | 16072653 |
|   | 7  | 15995456 | 16004086 | NM_178900    | chr7  | 16003442 | 16004054 |
| X |    | 15971815 | 15980323 | NM_172778    | chrX  | 15972714 | 15973505 |
|   | 16 | 15548385 | 15556936 | NM_008565    | chr16 | 15548306 | 15548914 |
|   | 18 | 15291965 | 15300464 | AY899808     | chr18 | 15294338 | 15294983 |
|   | 7  | 15272417 | 15280929 | NM_133727    | chr7  | 15278826 | 15279490 |
|   | 9  | 15249611 | 15258110 | NM_133214    | chr9  | 15256984 | 15257580 |
|   | 6  | 15129506 | 15138008 | NM_212435    | chr6  | 15129543 | 15130071 |
|   | 7  | 15102081 | 15110580 | NM_133831    | chr7  | 15107012 | 15107713 |
|   | 2  | 14961149 | 14975615 | NM_029466    | chr2  | 14973590 | 14974181 |
|   | 2  | 14964535 | 14978638 | NM_028950    | chr2  | 14973590 | 14974181 |
|   | 8  | 14882513 | 14891557 | NM_012000    | chr8  | 14890886 | 14891484 |
|   | 9  | 14792970 | 14801871 | NM_019482    | chr9  | 14796795 | 14797546 |
|   | 17 | 14720723 | 14729222 | NM_001034891 | chr17 | 14722741 | 14723660 |
|   | 5  | 14514924 | 14523498 | NM_011995    | chr5  | 14521058 | 14521669 |
|   | 13 | 14416403 | 14431062 | NM_134067    | chr13 | 14417015 | 14417621 |
|   | 13 | 14399380 | 14407892 | NM_008944    | chr13 | 14407860 | 14408664 |
|   | 13 | 14402642 | 14411198 | NM_029271    | chr13 | 14407860 | 14408664 |
|   | 16 | 14228411 | 14236910 | NM_025345    | chr16 | 14229244 | 14229834 |
|   | 17 | 14010132 | 14018655 | NM_022315    | chr17 | 14011633 | 14012337 |
|   | 8  | 13835850 | 13844349 | NM_153093    | chr8  | 13842729 | 13843324 |
|   | 2  | 13708730 | 13717274 | NM_145838    | chr2  | 13711087 | 13711695 |
|   | 13 | 13592183 | 13600682 | U37527       | chr13 | 13596741 | 13597247 |
|   | 17 | 13495435 | 13504141 | NM_022311    | chr17 | 13502947 | 13503715 |
|   | 19 | 13471590 | 13480089 | NM_146695    | chr19 | 13476011 | 13476606 |
|   | 3  | 13448214 | 13456713 | NM_178631    | chr3  | 13453910 | 13454623 |
|   | 19 | 13402779 | 13411278 | NM_146694    | chr19 | 13408678 | 13409325 |
|   | 5  | 13396790 | 13408167 | NM_009152    | chr5  | 13405233 | 13405882 |
|   | 8  | 13281990 | 13290754 | NM_172282    | chr8  | 13282561 | 13283050 |
|   | 16 | 13266217 | 13274716 | NM_153588    | chr16 | 13267874 | 13268468 |
|   | 17 | 13141000 | 13149499 | BC061173     | chr17 | 13143065 | 13144182 |
|   | 8  | 13015918 | 13028522 | NM_010172    | chr8  | 13018651 | 13019250 |
|   | 8  | 13015918 | 13028522 | NM_010172    | chr8  | 13016615 | 13017210 |



|   |    |          |          |              |       |          |          |
|---|----|----------|----------|--------------|-------|----------|----------|
| X |    | 13001016 | 13009515 | NM_009806    | chrX  | 13004190 | 13004832 |
|   | 19 | 12857212 | 12868161 | NM_134152    | chr19 | 12857768 | 12858614 |
|   | 19 | 12843473 | 12852114 | U05342       | chr19 | 12847369 | 12847974 |
| X |    | 12812322 | 12820826 | NM_175669    | chrX  | 12815190 | 12815936 |
| X |    | 12709406 | 12717905 | BC009740     | chrX  | 12717176 | 12717811 |
| X |    | 12709406 | 12717905 | BC009740     | chrX  | 12710344 | 12710955 |
| X |    | 12618631 | 12627131 | BC035244     | chrX  | 12626229 | 12626858 |
| X |    | 12618631 | 12627131 | BC035244     | chrX  | 12623691 | 12624718 |
| X |    | 12618631 | 12627131 | BC035244     | chrX  | 12621865 | 12622657 |
| X |    | 12618631 | 12627131 | BC035244     | chrX  | 12618950 | 12619537 |
|   | 15 | 12513572 | 12522071 | BC085315     | chr15 | 12519880 | 12520481 |
|   | 19 | 12455310 | 12463809 | NM_146684    | chr19 | 12460926 | 12461549 |
| X |    | 12442782 | 12452080 | U42386       | chrX  | 12448067 | 12449062 |
|   | 8  | 12390321 | 12398820 | NM_009233    | chr8  | 12394184 | 12394779 |
|   | 5  | 12383562 | 12392061 | NM_028882    | chr5  | 12386831 | 12387468 |
|   | 12 | 12296328 | 12304827 | NM_029758    | chr12 | 12297480 | 12298149 |
| X |    | 12222457 | 12230995 | NM_009481    | chrX  | 12227051 | 12227859 |
|   | 4  | 12012605 | 12021104 | NM_177861    | chr4  | 12019389 | 12020085 |
| X |    | 11916431 | 11925032 | NM_001048208 | chrX  | 11924242 | 11924656 |
|   | 4  | 11890350 | 11899567 | NM_001033453 | chr4  | 11890261 | 11890853 |
|   | 19 | 11883281 | 11892448 | NM_152220    | chr19 | 11886661 | 11887180 |
| X |    | 11828006 | 11836517 | NM_175141    | chrX  | 11828930 | 11829793 |
|   | 8  | 11776534 | 11785106 | U96634       | chr8  | 11782226 | 11782863 |
|   | 8  | 11676215 | 11684722 | NM_024271    | chr8  | 11684281 | 11685120 |
|   | 4  | 11625604 | 11635453 | NM_010276    | chr4  | 11632558 | 11633149 |
|   | 4  | 11309021 | 11320619 | NM_194055    | chr4  | 11314372 | 11314974 |
|   | 10 | 11293447 | 11301958 | NM_013898    | chr10 | 11297839 | 11298280 |
|   | 7  | 11204666 | 11213168 | NM_134234    | chr7  | 11208836 | 11209425 |
|   | 19 | 11013808 | 11022311 | NM_023731    | chr19 | 11018749 | 11019345 |
|   | 16 | 10999010 | 11007509 | NM_134105    | chr16 | 11000244 | 11000891 |
|   | 10 | 10974683 | 10983182 | BC037691     | chr10 | 10979794 | 10980517 |
|   | 16 | 10968523 | 10988129 | NM_009223    | chr16 | 10978879 | 10979458 |
|   | 12 | 10923772 | 10932304 | BC108372     | chr12 | 10931823 | 10932233 |
|   | 19 | 10801992 | 10810491 | NM_207529    | chr19 | 10805111 | 10805762 |
| X |    | 10450183 | 10484020 | BC049545     | chrX  | 10483192 | 10483765 |
| X |    | 10450183 | 10484020 | BC049545     | chrX  | 10481036 | 10481892 |
| X |    | 10450183 | 10484020 | BC049545     | chrX  | 10478123 | 10478999 |
| X |    | 10450183 | 10484020 | BC049545     | chrX  | 10476858 | 10477419 |
| X |    | 10450183 | 10484020 | BC049545     | chrX  | 10474847 | 10476183 |
| X |    | 10450183 | 10484020 | BC049545     | chrX  | 10473691 | 10474252 |
| X |    | 10450183 | 10484020 | BC049545     | chrX  | 10470524 | 10471085 |
| X |    | 10450183 | 10484020 | BC049545     | chrX  | 10468831 | 10469437 |
| X |    | 10450183 | 10484020 | BC049545     | chrX  | 10464190 | 10464751 |
| X |    | 10450183 | 10484020 | BC049545     | chrX  | 10460757 | 10461582 |
| X |    | 10450183 | 10484020 | BC049545     | chrX  | 10452071 | 10452705 |
|   | 3  | 10343505 | 10352014 | NM_025519    | chr3  | 10348306 | 10348936 |
|   | 19 | 10260234 | 10275657 | BC024923     | chr19 | 10275225 | 10275818 |

|   |    |          |                      |       |          |          |
|---|----|----------|----------------------|-------|----------|----------|
|   | 19 | 10265646 | 10276988 NM_007999   | chr19 | 10275225 | 10275818 |
|   | 19 | 10260234 | 10275657 BC024923    | chr19 | 10267648 | 10268283 |
|   | 19 | 10265646 | 10276988 NM_007999   | chr19 | 10267648 | 10268283 |
|   | 17 | 10159745 | 10170497 NM_021881   | chr17 | 10169426 | 10170188 |
|   | 17 | 10159745 | 10170497 NM_021881   | chr17 | 10160855 | 10161494 |
| X |    | 9868441  | 9877474 NM_026524    | chrX  | 9873297  | 9873925  |
| X |    | 9730352  | 9738851 BC026516     | chrX  | 9736215  | 9736812  |
| X |    | 9730352  | 9738851 BC026516     | chrX  | 9734010  | 9734837  |
|   | 7  | 9502480  | 9510979 NM_134228    | chr7  | 9506162  | 9506759  |
|   | 1  | 9281288  | 9290452 NM_027671    | chr1  | 9282641  | 9283270  |
| X |    | 9272047  | 9280620 NM_016911    | chrX  | 9273323  | 9273971  |
|   | 13 | 9161607  | 9170106 BC051459     | chr13 | 9169098  | 9169788  |
|   | 19 | 9050329  | 9058828 NM_009643    | chr19 | 9058142  | 9058735  |
| X |    | 8997906  | 9009161 NM_026096    | chrX  | 9006067  | 9007063  |
| X |    | 8817370  | 8825942 NM_025975    | chrX  | 8818279  | 8819373  |
|   | 19 | 8679084  | 8687659 NM_008766    | chr19 | 8683422  | 8684001  |
| X |    | 8623727  | 8632250 NM_007807    | chrX  | 8629911  | 8630823  |
| X |    | 8623727  | 8632250 NM_007807    | chrX  | 8624567  | 8625425  |
|   | 10 | 8573761  | 8582260 NM_175155    | chr10 | 8573822  | 8574431  |
|   | 15 | 8237870  | 8246369 BC055787     | chr15 | 8238853  | 8239657  |
| X |    | 8214049  | 8222548 NM_001038697 | chrX  | 8219949  | 8220568  |
| X |    | 8214049  | 8222548 NM_001038697 | chrX  | 8217258  | 8218820  |
| X |    | 8141132  | 8149631 BC104363     | chrX  | 8146026  | 8146959  |
| X |    | 8141132  | 8149631 BC104363     | chrX  | 8141179  | 8142392  |
| X |    | 7954650  | 7963149 NM_199319    | chrX  | 7961580  | 7962526  |
|   | 7  | 7953991  | 7962519 BC071238     | chr7  | 7959983  | 7960917  |
|   | 10 | 7489144  | 7497643 BC004652     | chr10 | 7491556  | 7492187  |
|   | 3  | 7414409  | 7422908 M63554       | chr3  | 7415290  | 7415906  |
| X |    | 7406736  | 7415365 NM_133991    | chrX  | 7407738  | 7408580  |
| X |    | 7347340  | 7356471 NM_007898    | chrX  | 7349998  | 7350724  |
| X |    | 7286820  | 7295562 NM_026137    | chrX  | 7294469  | 7295208  |
| X |    | 7244909  | 7253411 NM_009515    | chrX  | 7246746  | 7247361  |
| X |    | 7226930  | 7237599 NM_011514    | chrX  | 7228963  | 7229552  |
|   | 11 | 7091782  | 7100281 NM_008341    | chr11 | 7096006  | 7096790  |
| X |    | 7050357  | 7058874 NM_011591    | chrX  | 7055635  | 7056228  |
| X |    | 7050357  | 7058874 NM_011591    | chrX  | 7052119  | 7052807  |
|   | 19 | 6998930  | 7015201 NM_008431    | chr19 | 7009632  | 7010219  |
|   | 19 | 7002905  | 7011436 NM_007522    | chr19 | 7009632  | 7010219  |
|   | 19 | 6986311  | 6998424 NM_007953    | chr19 | 6991573  | 6992194  |
|   | 16 | 6979156  | 6987655 NM_183188    | chr16 | 6982319  | 6982916  |
| X |    | 6895747  | 6904283 NM_207202    | chrX  | 6897256  | 6898196  |
| X |    | 6873183  | 6888029 NM_172372    | chrX  | 6883161  | 6884826  |
| X |    | 6873183  | 6888029 NM_172372    | chrX  | 6878434  | 6879147  |
| X |    | 6825738  | 6834291 NM_019755    | chrX  | 6829010  | 6829877  |
| X |    | 6808348  | 6817991 NM_175097    | chrX  | 6814690  | 6815735  |
| X |    | 6789643  | 6799312 NM_009305    | chrX  | 6797653  | 6798413  |
| X |    | 6759785  | 6768351 NM_138603    | chrX  | 6767422  | 6768062  |

|   |    |         |                      |       |         |         |
|---|----|---------|----------------------|-------|---------|---------|
| X |    | 6728647 | 6745316 NM_054039    | chrX  | 6735559 | 6736167 |
|   | 13 | 6553322 | 6561821 BC006917     | chr13 | 6559720 | 6560314 |
|   | 11 | 6536132 | 6544652 NM_011709    | chr11 | 6537572 | 6538223 |
| X |    | 6530286 | 6538785 NM_019461    | chrX  | 6533413 | 6534131 |
|   | 11 | 6366372 | 6381920 NM_011221    | chr11 | 6378003 | 6378744 |
| X |    | 6343146 | 6351673 NM_016691    | chrX  | 6348861 | 6349680 |
|   | 15 | 6327980 | 6336537 NM_023118    | chr15 | 6334274 | 6335006 |
|   | 19 | 6270734 | 6279425 NM_010119    | chr19 | 6278635 | 6279233 |
|   | 19 | 6235668 | 6244226 NM_194348    | chr19 | 6243147 | 6243830 |
| X |    | 6218474 | 6227701 NM_001042542 | chrX  | 6218706 | 6219400 |
|   | 11 | 6165233 | 6180862 NM_026538    | chr11 | 6170895 | 6171568 |
|   | 11 | 6165233 | 6180862 NM_026538    | chr11 | 6166844 | 6167452 |
|   | 7  | 6082740 | 6098957 NM_146385    | chr7  | 6092399 | 6092854 |
|   | 7  | 6082740 | 6098957 NM_146385    | chr7  | 6091524 | 6092135 |
|   | 19 | 6040662 | 6049644 NM_028769    | chr19 | 6047471 | 6048183 |
|   | 2  | 6044907 | 6056844 NM_144883    | chr2  | 6045134 | 6045743 |
|   | 11 | 5849835 | 5858388 NM_019661    | chr11 | 5849858 | 5850457 |
|   | 11 | 5796282 | 5804785 NM_022879    | chr11 | 5801207 | 5801855 |
|   | 1  | 5572574 | 5581137 NM_011011    | chr1  | 5575110 | 5575556 |
|   | 19 | 5419157 | 5427764 NM_134149    | chr19 | 5425132 | 5425876 |
|   | 19 | 5422417 | 5430916 NM_024176    | chr19 | 5425132 | 5425876 |
| X |    | 5216983 | 5225736 NM_021431    | chrX  | 5217191 | 5217902 |
|   | 19 | 5115745 | 5124252 NM_008451    | chr19 | 5122198 | 5122908 |
|   | 18 | 5040585 | 5049084 NM_153153    | chr18 | 5041953 | 5042917 |
|   | 1  | 5007008 | 5015716 NM_021374    | chr1  | 5014703 | 5015488 |
|   | 1  | 5007008 | 5015716 NM_021374    | chr1  | 5009368 | 5010378 |
|   | 19 | 4924564 | 4934252 NM_133803    | chr19 | 4931472 | 4932071 |
|   | 16 | 4848339 | 4856849 NM_025839    | chr16 | 4855025 | 4855670 |
|   | 19 | 4833415 | 4841914 NM_207268    | chr19 | 4839411 | 4840000 |
|   | 19 | 4836788 | 4845322 NM_016892    | chr19 | 4839411 | 4840000 |
| X |    | 4509172 | 4517671 BC117727     | chrX  | 4513199 | 4514192 |
|   | 19 | 4394578 | 4404266 NM_001001984 | chr19 | 4397892 | 4398478 |
|   | 1  | 4347850 | 4356473 NM_011283    | chr1  | 4355682 | 4356272 |
|   | 11 | 4160587 | 4169597 NM_001039537 | chr11 | 4162249 | 4163347 |
|   | 19 | 4142663 | 4158371 NM_011778    | chr19 | 4155421 | 4156253 |
|   | 2  | 4064143 | 4072643 NM_172475    | chr2  | 4071611 | 4072422 |
|   | 11 | 4054371 | 4062896 NM_026175    | chr11 | 4060891 | 4061710 |
|   | 11 | 4057797 | 4066296 NM_177616    | chr11 | 4060891 | 4061710 |
|   | 19 | 4035413 | 4048221 NM_013541    | chr19 | 4037876 | 4038362 |
|   | 19 | 4035413 | 4048221 NM_013541    | chr19 | 4035886 | 4036520 |
|   | 4  | 4002162 | 4010661 BC125450     | chr4  | 4008309 | 4008919 |
|   | 11 | 3925785 | 3934284 NM_146013    | chr11 | 3931548 | 3932188 |
|   | 15 | 3927074 | 3935573 NM_134099    | chr15 | 3930422 | 3931085 |
|   | 19 | 3921406 | 3935737 NM_026316    | chr19 | 3929149 | 3929864 |
|   | 19 | 3929219 | 3946181 NM_019449    | chr19 | 3929149 | 3929864 |
|   | 12 | 3885758 | 3894257 NM_153743    | chr12 | 3885755 | 3886336 |
|   | 11 | 3877639 | 3886215 NM_016922    | chr11 | 3878338 | 3879258 |

|    |         |         |              |       |         |         |
|----|---------|---------|--------------|-------|---------|---------|
| 16 | 3793911 | 3802410 | NM_029090    | chr16 | 3801586 | 3802135 |
| 11 | 3789250 | 3797783 | NM_173745    | chr11 | 3797035 | 3797836 |
| 11 | 3792602 | 3801101 | NM_026150    | chr11 | 3797035 | 3797836 |
| 7  | 3750355 | 3758959 | NM_175529    | chr7  | 3751372 | 3752019 |
| 19 | 3702333 | 3710910 | NM_028077    | chr19 | 3709474 | 3709815 |
| 5  | 3571679 | 3580221 | BC099581     | chr5  | 3573269 | 3573865 |
| 4  | 3496035 | 3504656 | NM_054089    | chr4  | 3496493 | 3497154 |
| 19 | 3317320 | 3325847 | NM_013495    | chr19 | 3321952 | 3322543 |
| 7  | 3230208 | 3238971 | NM_023524    | chr7  | 3236297 | 3236900 |
| 7  | 3227072 | 3236143 | NM_027328    | chr7  | 3231703 | 3232309 |
| 7  | 3230208 | 3238971 | NM_023524    | chr7  | 3231703 | 3232309 |
| 11 | 3042349 | 3050848 | BC048950     | chr11 | 3045781 | 3046364 |
| 11 | 3042349 | 3050848 | BC048950     | chr11 | 3043847 | 3044475 |
| 11 | 3018018 | 3032526 | NM_001004146 | chr11 | 3027935 | 3028691 |
| Y  | 579662  | 588181  | NM_009484    | chrY  | 582075  | 582690  |
| Y  | 579662  | 588181  | NM_009484    | chrY  | 581031  | 581628  |
| Y  | 341038  | 349554  | NM_012011    | chrY  | 342734  | 343329  |
| Y  | 131353  | 139852  | NM_009570    | chrY  | 137985  | 139146  |

| gene overlap percent | region overlap percent | length(bps) | probes in region | p-value(region) |
|----------------------|------------------------|-------------|------------------|-----------------|
| 0.0858824            | 1                      | 730         | 20               | 0.00943663      |
| 0.0438824            | 1                      | 373         | 10               | 0.00646175      |
| 0.0658824            | 1                      | 560         | 11               | 0.00895111      |
| 0.0670588            | 1                      | 570         | 16               | 0.00913649      |
| 0.0911201            | 1                      | 785         | 19               | 0.00379584      |
| 0.0648235            | 1                      | 551         | 16               | 0.00635582      |
| 0.101683             | 1                      | 870         | 24               | 0.00588796      |
| 0.0354238            | 1                      | 710         | 20               | 0.00429018      |
| 0.0532023            | 1                      | 628         | 18               | 0.00808601      |
| 0.0842353            | 0.98895                | 724         | 20               | 0.00399887      |
| 0.0725882            | 1                      | 617         | 17               | 0.00677954      |
| 0.130941             | 1                      | 1113        | 31               | 0.00710616      |
| 0.074035             | 1                      | 631         | 18               | 0.00631168      |
| 0.0770588            | 1                      | 655         | 18               | 0.00765347      |
| 0.0796471            | 1                      | 677         | 18               | 0.00609982      |
| 0.0400152            | 1                      | 632         | 18               | 0.00594975      |
| 0.101176             | 1                      | 860         | 24               | 0.00635582      |
| 0.158824             | 1                      | 1350        | 37               | 0.00549072      |
| 0.0954434            | 1                      | 819         | 23               | 0.00635582      |
| 0.0483414            | 1                      | 819         | 23               | 0.00635582      |
| 0.0715534            | 1                      | 614         | 18               | 0.0054819       |
| 0.0818824            | 1                      | 696         | 20               | 0.00509348      |
| 0.117882             | 1                      | 1002        | 28               | 0.00646175      |
| 0.0609412            | 1                      | 518         | 10               | 0.00963966      |
| 0.0736694            | 1                      | 627         | 18               | 0.00594093      |
| 0.0730588            | 1                      | 621         | 17               | 0.00649706      |
| 0.0988235            | 1                      | 840         | 24               | 0.00430783      |
| 0.0355238            | 1                      | 586         | 12               | 0.00996628      |
| 0.0716712            | 1                      | 612         | 17               | 0.00765347      |
| 0.057618             | 1                      | 492         | 14               | 0.00581734      |
| 0.0577533            | 1                      | 492         | 14               | 0.00581734      |
| 0.0761826            | 1                      | 649         | 18               | 0.005323        |
| 0.103765             | 1                      | 882         | 25               | 0.0048728       |
| 0.0531765            | 1                      | 452         | 13               | 0.00948959      |
| 0.070063             | 1                      | 601         | 17               | 0.00888049      |
| 0.06989              | 1                      | 597         | 15               | 0.00399887      |
| 0.0581197            | 1                      | 646         | 18               | 0.00607334      |
| 0.0796283            | 1                      | 677         | 19               | 0.00697375      |
| 0.0962262            | 1                      | 946         | 26               | 0.00707085      |
| 0.0302583            | 1                      | 594         | 17               | 0.00744161      |
| 0.0441308            | 1                      | 594         | 17               | 0.00744161      |
| 0.0801177            | 1                      | 681         | 19               | 0.00685899      |
| 0.0801177            | 1                      | 681         | 19               | 0.00685899      |
| 0.0825645            | 1                      | 707         | 20               | 0.00398121      |

|           |          |      |    |            |
|-----------|----------|------|----|------------|
| 0.111111  | 1        | 953  | 27 | 0.00729154 |
| 0.0723992 | 1        | 650  | 18 | 0.00847443 |
| 0.078904  | 1        | 671  | 14 | 0.00855387 |
| 0.0998356 | 1        | 850  | 22 | 0.0069914  |
| 0.0781176 | 1        | 664  | 19 | 0.00434314 |
| 0.0924706 | 1        | 786  | 21 | 0.00508466 |
| 0.0843684 | 1        | 720  | 18 | 0.00608217 |
| 0.144418  | 1        | 1229 | 34 | 0.0075034  |
| 0.144012  | 1        | 1229 | 34 | 0.0075034  |
| 0.0788871 | 1        | 689  | 19 | 0.00758285 |
| 0.0695114 | 1        | 606  | 17 | 0.00733567 |
| 0.117571  | 1        | 1001 | 25 | 0.00543776 |
| 0.0723532 | 1        | 626  | 18 | 0.00843029 |
| 0.101882  | 1        | 866  | 19 | 0.00401653 |
| 0.0679781 | 1        | 584  | 14 | 0.00578203 |
| 0.108247  | 1        | 924  | 21 | 0.00361046 |
| 0.120471  | 1        | 1024 | 27 | 0.00564962 |
| 0.0727059 | 1        | 618  | 15 | 0.00931304 |
| 0.0711765 | 1        | 605  | 13 | 0.0054201  |
| 0.0724609 | 1        | 742  | 21 | 0.00701788 |
| 0.0797042 | 1        | 679  | 14 | 0.00616161 |
| 0.0887954 | 1        | 760  | 16 | 0.00240991 |
| 0.0745954 | 1        | 636  | 18 | 0.00848325 |
| 0.085034  | 1        | 725  | 20 | 0.00489928 |
| 0.0690426 | 1        | 587  | 11 | 0.00888932 |
| 0.086215  | 1        | 733  | 20 | 0.00713264 |
| 0.0614066 | 1        | 523  | 13 | 0.00573789 |
| 0.0798403 | 1        | 680  | 12 | 0.00624989 |
| 0.0428143 | 1        | 600  | 12 | 0.00437845 |
| 0.0517161 | 0.743333 | 600  | 12 | 0.00437845 |
| 0.0704626 | 1        | 620  | 10 | 0.00661182 |
| 0.199412  | 1        | 1695 | 44 | 0.00634699 |
| 0.04995   | 1        | 650  | 13 | 0.00980738 |
| 0.0749712 | 1        | 650  | 13 | 0.00980738 |
| 0.0723595 | 1        | 1127 | 32 | 0.00552603 |
| 0.0395506 | 1        | 616  | 17 | 0.00865981 |
| 0.062401  | 1        | 591  | 15 | 0.00999276 |
| 0.06824   | 1        | 613  | 17 | 0.00485514 |
| 0.0741176 | 1        | 630  | 17 | 0.00622341 |
| 0.073935  | 1        | 630  | 17 | 0.00622341 |
| 0.0578505 | 1        | 605  | 17 | 0.00971028 |
| 0.0702353 | 1        | 597  | 17 | 0.00712381 |
| 0.0547059 | 0.744    | 625  | 17 | 0.00697375 |
| 0.0784038 | 1        | 668  | 19 | 0.00743278 |
| 0.0726381 | 1        | 622  | 15 | 0.00693844 |
| 0.0704706 | 1        | 599  | 17 | 0.00957787 |
| 0.0894118 | 1        | 760  | 19 | 0.00517293 |

|           |   |      |    |            |
|-----------|---|------|----|------------|
| 0.0749412 | 1 | 637  | 18 | 0.00661182 |
| 0.122824  | 1 | 1044 | 26 | 0.00558783 |
| 0.0818768 | 1 | 698  | 18 | 0.00609099 |
| 0.0760921 | 1 | 648  | 16 | 0.0062852  |
| 0.0934118 | 1 | 794  | 19 | 0.00685016 |
| 0.0537805 | 1 | 712  | 20 | 0.00701788 |
| 0.0641176 | 1 | 545  | 12 | 0.00957787 |
| 0.06378   | 1 | 545  | 12 | 0.00957787 |
| 0.0721176 | 1 | 613  | 17 | 0.00697375 |
| 0.0759832 | 1 | 653  | 19 | 0.00592327 |
| 0.103561  | 1 | 890  | 25 | 0.00744161 |
| 0.0709412 | 1 | 603  | 17 | 0.00961318 |
| 0.0570458 | 1 | 487  | 14 | 0.00821843 |
| 0.0866252 | 1 | 739  | 18 | 0.00707085 |
| 0.0869412 | 1 | 739  | 18 | 0.00707085 |
| 0.0596491 | 1 | 510  | 10 | 0.00792712 |
| 0.0558824 | 1 | 475  | 13 | 0.00658534 |
| 0.0721176 | 1 | 613  | 12 | 0.00430783 |
| 0.0724706 | 1 | 616  | 17 | 0.00743278 |
| 0.0622353 | 1 | 529  | 14 | 0.00835967 |
| 0.0707059 | 1 | 601  | 17 | 0.00975442 |
| 0.0587088 | 1 | 602  | 11 | 0.00850974 |
| 0.0778088 | 1 | 669  | 19 | 0.00629403 |
| 0.0964706 | 1 | 820  | 23 | 0.00539362 |
| 0.0834115 | 1 | 711  | 16 | 0.00631168 |
| 0.0695294 | 1 | 591  | 17 | 0.0087216  |
| 0.050399  | 1 | 600  | 17 | 0.00779471 |
| 0.0636669 | 1 | 607  | 17 | 0.00927773 |
| 0.0405684 | 1 | 591  | 17 | 0.00981621 |
| 0.0898622 | 1 | 835  | 22 | 0.00741512 |
| 0.124085  | 1 | 1153 | 32 | 0.00756519 |
| 0.0739025 | 1 | 702  | 20 | 0.00695609 |
| 0.105257  | 1 | 907  | 25 | 0.00645292 |
| 0.086     | 1 | 731  | 21 | 0.00695609 |
| 0.0815491 | 1 | 697  | 20 | 0.0060292  |
| 0.0767059 | 1 | 652  | 13 | 0.00344274 |
| 0.105647  | 1 | 898  | 19 | 0.00482866 |
| 0.0706706 | 1 | 606  | 17 | 0.00936601 |
| 0.0674107 | 1 | 598  | 13 | 0.00723857 |
| 0.0753167 | 1 | 642  | 18 | 0.00926008 |
| 0.113591  | 1 | 967  | 22 | 0.00512879 |
| 0.0921377 | 1 | 784  | 22 | 0.00726506 |
| 0.0484355 | 1 | 791  | 18 | 0.00756519 |
| 0.0728235 | 1 | 619  | 10 | 0.00434314 |
| 0.0494061 | 1 | 678  | 19 | 0.00659416 |
| 0.0696582 | 1 | 593  | 11 | 0.00569376 |
| 0.0711765 | 1 | 605  | 17 | 0.00650589 |

|           |          |      |    |            |
|-----------|----------|------|----|------------|
| 0.0710177 | 1        | 605  | 17 | 0.00650589 |
| 0.0684521 | 1        | 639  | 18 | 0.00790064 |
| 0.0905882 | 1        | 770  | 21 | 0.0054201  |
| 0.0146696 | 0.235405 | 531  | 10 | 0.00747692 |
| 0.0824718 | 1        | 702  | 18 | 0.00978973 |
| 0.126646  | 1        | 1077 | 23 | 0.00492576 |
| 0.109831  | 1        | 934  | 25 | 0.0065412  |
| 0.0678654 | 1        | 619  | 16 | 0.00648823 |
| 0.0724701 | 1        | 661  | 19 | 0.00957787 |
| 0.037573  | 1        | 618  | 18 | 0.00561431 |
| 0.0574118 | 1        | 488  | 14 | 0.00847443 |
| 0.0571295 | 1        | 488  | 14 | 0.00847443 |
| 0.0698824 | 1        | 594  | 17 | 0.00889815 |
| 0.0695387 | 1        | 594  | 17 | 0.00889815 |
| 0.132368  | 1        | 1134 | 19 | 0.00617044 |
| 0.129412  | 1        | 1100 | 29 | 0.0054201  |
| 0.0848235 | 1        | 721  | 21 | 0.00434314 |
| 0.158     | 1        | 1343 | 36 | 0.00744161 |
| 0.0831765 | 1        | 707  | 20 | 0.00566727 |
| 0.0501271 | 1        | 631  | 16 | 0.00706202 |
| 0.0595806 | 1        | 750  | 20 | 0.00511114 |
| 0.0834118 | 1        | 709  | 20 | 0.00969263 |
| 0.0812887 | 1        | 709  | 20 | 0.00969263 |
| 0.0694444 | 1        | 610  | 18 | 0.00963966 |
| 0.0696665 | 1        | 610  | 18 | 0.00963966 |
| 0.0676471 | 1        | 575  | 15 | 0.00371639 |
| 0.108941  | 1        | 926  | 16 | 0.00614396 |
| 0.11      | 1        | 935  | 24 | 0.00300136 |
| 0.0864763 | 1        | 736  | 13 | 0.00632934 |
| 0.0752927 | 1        | 643  | 14 | 0.00416659 |
| 0.112376  | 1        | 1017 | 28 | 0.00645292 |
| 0.112706  | 1        | 958  | 28 | 0.00903056 |
| 0.0874118 | 1        | 743  | 19 | 0.00416659 |
| 0.07      | 1        | 595  | 17 | 0.00772409 |
| 0.0671765 | 1        | 571  | 14 | 0.00381349 |
| 0.0719737 | 1        | 613  | 18 | 0.00848325 |
| 0.0761176 | 1        | 647  | 14 | 0.00466976 |
| 0.0728932 | 1        | 647  | 17 | 0.00476687 |
| 0.0890588 | 1        | 757  | 21 | 0.00715913 |
| 0.0994118 | 1        | 845  | 24 | 0.00458149 |
| 0.0682353 | 1        | 580  | 16 | 0.0096838  |
| 0.068655  | 1        | 587  | 17 | 0.00667361 |
| 0.0788235 | 1        | 670  | 19 | 0.00941897 |
| 0.0694219 | 1        | 598  | 16 | 0.00949842 |
| 0.0672941 | 1        | 572  | 13 | 0.00899525 |
| 0.0708235 | 1        | 602  | 10 | 0.00594975 |
| 0.0623932 | 1        | 621  | 18 | 0.00660299 |



|           |   |      |    |            |
|-----------|---|------|----|------------|
| 0.0753156 | 1 | 710  | 20 | 0.0068943  |
| 0.0519517 | 1 | 740  | 21 | 0.00889815 |
| 0.0260461 | 1 | 371  | 11 | 0.00889815 |
| 0.0554081 | 1 | 689  | 15 | 0.00601155 |
| 0.10969   | 1 | 1364 | 38 | 0.0065412  |
| 0.0828235 | 1 | 704  | 18 | 0.00677071 |
| 0.065613  | 1 | 631  | 15 | 0.00515528 |
| 0.0789262 | 1 | 688  | 19 | 0.00557017 |
| 0.101176  | 1 | 860  | 20 | 0.00700023 |
| 0.0703364 | 1 | 598  | 17 | 0.00645292 |
| 0.0649412 | 1 | 552  | 16 | 0.00765347 |
| 0.056563  | 1 | 602  | 17 | 0.00772409 |
| 0.0363097 | 1 | 612  | 15 | 0.00839498 |
| 0.0355384 | 1 | 599  | 17 | 0.0075034  |
| 0.0888328 | 1 | 774  | 22 | 0.00458149 |
| 0.0865227 | 1 | 737  | 21 | 0.00423721 |
| 0.0501755 | 1 | 629  | 18 | 0.00764464 |
| 0.0471442 | 1 | 591  | 17 | 0.00629403 |
| 0.104     | 1 | 884  | 22 | 0.00635582 |
| 0.103647  | 1 | 881  | 25 | 0.00893346 |
| 0.0569771 | 1 | 599  | 17 | 0.00779471 |
| 0.0732941 | 1 | 623  | 18 | 0.00758285 |
| 0.0698629 | 1 | 596  | 11 | 0.00645292 |
| 0.0694933 | 1 | 613  | 18 | 0.00927773 |
| 0.0391183 | 1 | 591  | 14 | 0.00729154 |
| 0.0792941 | 1 | 674  | 15 | 0.00859801 |
| 0.0619141 | 1 | 885  | 25 | 0.00619692 |
| 0.0491115 | 1 | 702  | 20 | 0.0082096  |
| 0.0492242 | 1 | 441  | 13 | 0.00902173 |
| 0.0686461 | 1 | 615  | 16 | 0.00855387 |
| 0.0710588 | 1 | 604  | 15 | 0.00677071 |
| 0.0711765 | 1 | 605  | 13 | 0.00980738 |
| 0.0711765 | 1 | 605  | 13 | 0.00980738 |
| 0.0950646 | 1 | 809  | 22 | 0.00645292 |
| 0.0305805 | 1 | 648  | 18 | 0.0092689  |
| 0.0707059 | 1 | 601  | 13 | 0.00918063 |
| 0.0978824 | 1 | 832  | 21 | 0.00581734 |
| 0.0391639 | 1 | 356  | 10 | 0.00736216 |
| 0.0710671 | 1 | 646  | 18 | 0.00930421 |
| 0.0991822 | 1 | 849  | 24 | 0.00767995 |
| 0.0874758 | 1 | 813  | 22 | 0.00649706 |
| 0.0479661 | 1 | 408  | 11 | 0.00873042 |
| 0.0803529 | 1 | 683  | 15 | 0.00482866 |
| 0.0716218 | 1 | 609  | 16 | 0.0056761  |
| 0.0843529 | 1 | 717  | 19 | 0.00651472 |
| 0.0927859 | 1 | 791  | 22 | 0.00727388 |
| 0.105689  | 1 | 901  | 24 | 0.00707085 |

|           |   |      |    |            |
|-----------|---|------|----|------------|
| 0.0737158 | 1 | 1204 | 34 | 0.00526121 |
| 0.0551644 | 1 | 901  | 25 | 0.0062852  |
| 0.0718057 | 1 | 612  | 15 | 0.00865981 |
| 0.131412  | 1 | 1117 | 31 | 0.00623224 |
| 0.0702353 | 1 | 597  | 17 | 0.00981621 |
| 0.0613019 | 1 | 614  | 17 | 0.00957787 |
| 0.0712941 | 1 | 606  | 17 | 0.00694727 |
| 0.0693336 | 1 | 591  | 15 | 0.00760933 |
| 0.0720364 | 1 | 618  | 18 | 0.00539362 |
| 0.0431173 | 1 | 696  | 19 | 0.00432549 |
| 0.0729412 | 1 | 620  | 18 | 0.00911001 |
| 0.0467143 | 1 | 654  | 19 | 0.00695609 |
| 0.0926529 | 1 | 797  | 21 | 0.00669127 |
| 0.0343527 | 1 | 574  | 13 | 0.00944545 |
| 0.0861988 | 1 | 737  | 21 | 0.00730036 |
| 0.0490588 | 1 | 417  | 10 | 0.0056761  |
| 0.0691765 | 1 | 588  | 13 | 0.00667361 |
| 0.0540876 | 1 | 872  | 24 | 0.00502286 |
| 0.050042  | 1 | 835  | 23 | 0.00668244 |
| 0.0584362 | 1 | 994  | 28 | 0.00831553 |
| 0.108634  | 1 | 994  | 28 | 0.00831553 |
| 0.0688486 | 1 | 589  | 15 | 0.009622   |
| 0.0717709 | 1 | 614  | 13 | 0.00491693 |
| 0.0884759 | 1 | 757  | 21 | 0.0061881  |
| 0.07704   | 1 | 659  | 16 | 0.00435197 |
| 0.119626  | 1 | 1024 | 28 | 0.0067972  |
| 0.0708235 | 1 | 602  | 17 | 0.00961318 |
| 0.117294  | 1 | 997  | 22 | 0.00712381 |
| 0.0563994 | 1 | 880  | 19 | 0.00761816 |
| 0.0742644 | 1 | 636  | 16 | 0.00439611 |
| 0.0690588 | 1 | 587  | 16 | 0.00590562 |
| 0.0687032 | 1 | 587  | 16 | 0.00590562 |
| 0.0502615 | 1 | 788  | 22 | 0.00697375 |
| 0.0967105 | 1 | 832  | 23 | 0.0063823  |
| 0.0837946 | 1 | 772  | 21 | 0.00626754 |
| 0.0492941 | 1 | 419  | 10 | 0.00225102 |
| 0.0889412 | 1 | 756  | 21 | 0.00587913 |
| 0.02386   | 1 | 619  | 16 | 0.00950725 |
| 0.080757  | 1 | 687  | 18 | 0.00748574 |
| 0.0694395 | 1 | 591  | 16 | 0.00915415 |
| 0.0695294 | 1 | 591  | 17 | 0.00951608 |
| 0.0722353 | 1 | 614  | 17 | 0.00635582 |
| 0.0701363 | 1 | 597  | 17 | 0.00635582 |
| 0.129615  | 1 | 1306 | 37 | 0.00758285 |
| 0.0626821 | 1 | 710  | 20 | 0.00537597 |
| 0.0279099 | 1 | 587  | 15 | 0.00857153 |
| 0.074718  | 1 | 636  | 18 | 0.00722092 |

|           |         |      |    |            |
|-----------|---------|------|----|------------|
| 0.0767062 | 1       | 653  | 18 | 0.00636465 |
| 0.11594   | 1       | 987  | 23 | 0.00639996 |
| 0.0728235 | 1       | 619  | 17 | 0.00906587 |
| 0.0897647 | 1       | 763  | 21 | 0.00764464 |
| 0.0696471 | 1       | 592  | 17 | 0.00874808 |
| 0.0820171 | 1       | 701  | 16 | 0.0076005  |
| 0.0824706 | 1       | 701  | 16 | 0.0076005  |
| 0.066574  | 1       | 575  | 16 | 0.0060292  |
| 0.093695  | 1       | 798  | 23 | 0.00514645 |
| 0.0425836 | 1       | 625  | 13 | 0.00634699 |
| 0.0989303 | 1       | 1452 | 36 | 0.00330149 |
| 0.0528718 | 1       | 776  | 19 | 0.00739747 |
| 0.053962  | 1       | 792  | 21 | 0.00687664 |
| 0.0498241 | 1       | 425  | 12 | 0.00806836 |
| 0.0463668 | 1       | 603  | 15 | 0.00415777 |
| 0.0767397 | 1       | 998  | 27 | 0.00539362 |
| 0.0717038 | 1       | 614  | 15 | 0.00920711 |
| 0.0467512 | 1       | 608  | 15 | 0.00850974 |
| 0.0796962 | 1       | 829  | 17 | 0.00457266 |
| 0.0571044 | 1       | 594  | 15 | 0.00746809 |
| 0.0596039 | 1       | 620  | 18 | 0.00621458 |
| 0.0753898 | 1       | 643  | 18 | 0.00267474 |
| 0.0780865 | 1       | 666  | 18 | 0.00687664 |
| 0.0764706 | 1       | 650  | 14 | 0.00465211 |
| 0.138425  | 1       | 1178 | 31 | 0.00512879 |
| 0.137746  | 1       | 1178 | 31 | 0.00512879 |
| 0.0809221 | 0.99422 | 692  | 19 | 0.00580851 |
| 0.097036  | 1       | 825  | 20 | 0.00625872 |
| 0.0777427 | 1       | 664  | 19 | 0.00639996 |
| 0.105356  | 1       | 897  | 22 | 0.00831553 |
| 0.0675554 | 1       | 598  | 17 | 0.00744161 |
| 0.0613966 | 1       | 546  | 15 | 0.00579086 |
| 0.0718063 | 1       | 611  | 10 | 0.00932187 |
| 0.0717647 | 1       | 610  | 17 | 0.00883636 |
| 0.0870773 | 1       | 752  | 21 | 0.00708851 |
| 0.104     | 1       | 884  | 25 | 0.00720326 |
| 0.0554968 | 1       | 577  | 16 | 0.00630285 |
| 0.0989412 | 1       | 841  | 22 | 0.00373404 |
| 0.0717647 | 1       | 610  | 17 | 0.00594093 |
| 0.0684706 | 1       | 582  | 14 | 0.00809484 |
| 0.108152  | 1       | 922  | 26 | 0.00559665 |
| 0.0729412 | 1       | 620  | 18 | 0.00911884 |
| 0.0763529 | 1       | 649  | 18 | 0.00895111 |
| 0.0677295 | 1       | 582  | 16 | 0.00468742 |
| 0.0794321 | 1       | 677  | 15 | 0.00591444 |
| 0.07862   | 1       | 670  | 19 | 0.00530534 |
| 0.0549976 | 1       | 690  | 20 | 0.00999276 |

|           |   |      |    |            |
|-----------|---|------|----|------------|
| 0.071143  | 1 | 605  | 17 | 0.00790064 |
| 0.114807  | 1 | 1063 | 29 | 0.00552603 |
| 0.0903975 | 1 | 771  | 22 | 0.00519941 |
| 0.07      | 1 | 595  | 17 | 0.0089776  |
| 0.0768158 | 1 | 771  | 22 | 0.00424604 |
| 0.0881176 | 1 | 749  | 21 | 0.00629403 |
| 0.0710784 | 1 | 609  | 17 | 0.00826257 |
| 0.100471  | 1 | 854  | 23 | 0.00481983 |
| 0.0709984 | 1 | 613  | 15 | 0.00911001 |
| 0.0738583 | 1 | 634  | 18 | 0.00695609 |
| 0.0702145 | 1 | 599  | 17 | 0.00993097 |
| 0.0393016 | 1 | 646  | 15 | 0.00632934 |
| 0.0670703 | 1 | 709  | 15 | 0.00727388 |
| 0.0817574 | 1 | 709  | 15 | 0.00727388 |
| 0.0718824 | 1 | 611  | 10 | 0.00587913 |
| 0.0729412 | 1 | 620  | 18 | 0.00551721 |
| 0.11858   | 1 | 1009 | 15 | 0.00855387 |
| 0.0792941 | 1 | 674  | 17 | 0.00914532 |
| 0.0842353 | 1 | 716  | 20 | 0.0068943  |
| 0.0617503 | 1 | 592  | 17 | 0.00719444 |
| 0.0621191 | 1 | 530  | 15 | 0.00693844 |
| 0.0915932 | 1 | 779  | 20 | 0.00702671 |
| 0.0707819 | 1 | 602  | 13 | 0.00518176 |
| 0.0828762 | 1 | 710  | 20 | 0.00722092 |
| 0.0727059 | 1 | 618  | 18 | 0.00616161 |
| 0.0721176 | 1 | 613  | 17 | 0.00584382 |
| 0.0470525 | 1 | 696  | 20 | 0.00938366 |
| 0.0541176 | 1 | 460  | 11 | 0.00822726 |
| 0.0949649 | 1 | 811  | 22 | 0.00225102 |
| 0.0352618 | 1 | 590  | 10 | 0.00828022 |
| 0.0754354 | 1 | 706  | 20 | 0.00988683 |
| 0.077796  | 1 | 665  | 16 | 0.00645292 |
| 0.0594121 | 1 | 665  | 16 | 0.00645292 |
| 0.0630088 | 1 | 596  | 17 | 0.00701788 |
| 0.0696471 | 1 | 592  | 17 | 0.00493459 |
| 0.0790023 | 1 | 681  | 19 | 0.00878339 |
| 0.0813474 | 1 | 710  | 20 | 0.00745926 |
| 0.0797229 | 1 | 679  | 19 | 0.00706202 |
| 0.0755977 | 1 | 645  | 18 | 0.00537597 |
| 0.0702715 | 1 | 603  | 12 | 0.00858918 |
| 0.0761176 | 1 | 647  | 18 | 0.00967497 |
| 0.072912  | 1 | 653  | 11 | 0.0063823  |
| 0.0634394 | 1 | 726  | 20 | 0.00539362 |
| 0.070122  | 1 | 598  | 17 | 0.00989566 |
| 0.123061  | 1 | 1047 | 25 | 0.00597624 |
| 0.0682806 | 1 | 581  | 16 | 0.00948077 |
| 0.0704706 | 1 | 599  | 13 | 0.00920711 |

|           |   |      |    |            |
|-----------|---|------|----|------------|
| 0.0538551 | 1 | 600  | 17 | 0.00727388 |
| 0.0823529 | 1 | 700  | 17 | 0.00590562 |
| 0.0963076 | 1 | 819  | 16 | 0.00389294 |
| 0.0675294 | 1 | 574  | 16 | 0.00779471 |
| 0.0721529 | 1 | 619  | 18 | 0.009622   |
| 0.035922  | 1 | 593  | 14 | 0.00639996 |
| 0.0940031 | 1 | 801  | 19 | 0.00758285 |
| 0.0748268 | 1 | 648  | 18 | 0.00508466 |
| 0.0653867 | 1 | 596  | 10 | 0.00813015 |
| 0.10927   | 1 | 996  | 27 | 0.00764464 |
| 0.0618919 | 1 | 528  | 15 | 0.00632934 |
| 0.0675569 | 1 | 597  | 17 | 0.0087216  |
| 0.0406389 | 1 | 346  | 10 | 0.00764464 |
| 0.135599  | 1 | 1153 | 27 | 0.00308081 |
| 0.070967  | 1 | 604  | 12 | 0.00908353 |
| 0.0885912 | 1 | 754  | 21 | 0.00528769 |
| 0.0636471 | 1 | 541  | 16 | 0.00938366 |
| 0.0743529 | 1 | 632  | 16 | 0.00701788 |
| 0.0582353 | 1 | 495  | 15 | 0.0091718  |
| 0.0716471 | 1 | 609  | 17 | 0.00880104 |
| 0.0710358 | 1 | 620  | 12 | 0.00932187 |
| 0.0500176 | 1 | 427  | 11 | 0.00896877 |
| 0.0748235 | 1 | 636  | 18 | 0.00786533 |
| 0.0544947 | 1 | 859  | 23 | 0.00486397 |
| 0.0795268 | 1 | 679  | 14 | 0.00726506 |
| 0.0712943 | 1 | 607  | 16 | 0.00779471 |
| 0.0744356 | 1 | 633  | 14 | 0.00465211 |
| 0.070247  | 1 | 603  | 15 | 0.00919828 |
| 0.0712201 | 1 | 610  | 18 | 0.00953373 |
| 0.07      | 1 | 595  | 17 | 0.00527003 |
| 0.0696471 | 1 | 592  | 15 | 0.00919828 |
| 0.0727465 | 1 | 619  | 17 | 0.00652354 |
| 0.0889751 | 1 | 757  | 21 | 0.00764464 |
| 0.0682128 | 1 | 600  | 17 | 0.00692078 |
| 0.0306729 | 1 | 588  | 17 | 0.00875691 |
| 0.0352113 | 1 | 675  | 17 | 0.00385763 |
| 0.0742764 | 1 | 639  | 18 | 0.00345156 |
| 0.0871765 | 1 | 741  | 18 | 0.00646175 |
| 0.0997775 | 1 | 852  | 24 | 0.00543776 |
| 0.0582598 | 1 | 687  | 18 | 0.00991331 |
| 0.0921022 | 1 | 786  | 21 | 0.00639996 |
| 0.0696011 | 1 | 691  | 19 | 0.00520824 |
| 0.0592511 | 1 | 595  | 17 | 0.0066383  |
| 0.0827861 | 1 | 706  | 18 | 0.00601155 |
| 0.102115  | 1 | 869  | 17 | 0.00722092 |
| 0.0616471 | 1 | 524  | 15 | 0.00727388 |
| 0.0316832 | 1 | 592  | 17 | 0.00712381 |

|           |          |     |    |            |
|-----------|----------|-----|----|------------|
| 0.0709412 | 1        | 603 | 17 | 0.00960435 |
| 0.0860063 | 1        | 732 | 20 | 0.00648823 |
| 0.0970304 | 1        | 843 | 23 | 0.00741512 |
| 0.0701176 | 1        | 596 | 14 | 0.00948077 |
| 0.0830588 | 1        | 706 | 20 | 0.00457266 |
| 0.0755294 | 0.904225 | 710 | 20 | 0.00540245 |
| 0.0441239 | 1        | 618 | 18 | 0.00599389 |
| 0.0673423 | 1        | 618 | 18 | 0.00599389 |
| 0.0704706 | 1        | 599 | 17 | 0.00619692 |
| 0.0704292 | 1        | 599 | 17 | 0.00619692 |
| 0.0700797 | 1        | 642 | 18 | 0.00918946 |
| 0.0705882 | 1        | 600 | 14 | 0.0087216  |
| 0.0777528 | 1        | 692 | 19 | 0.00584382 |
| 0.0629736 | 1        | 590 | 16 | 0.00991331 |
| 0.0632941 | 1        | 538 | 12 | 0.00875691 |
| 0.0608386 | 1        | 991 | 28 | 0.00539362 |
| 0.0314229 | 1        | 676 | 12 | 0.00786533 |
| 0.0595873 | 1        | 849 | 23 | 0.00621458 |
| 0.0963529 | 1        | 819 | 21 | 0.00687664 |
| 0.0751765 | 1        | 639 | 18 | 0.00640879 |
| 0.0751765 | 1        | 639 | 18 | 0.00640879 |
| 0.088     | 1        | 748 | 21 | 0.00669127 |
| 0.0760608 | 1        | 760 | 21 | 0.00838615 |
| 0.0750588 | 1        | 638 | 13 | 0.00941897 |
| 0.054057  | 1        | 992 | 26 | 0.00444025 |
| 0.1165    | 1        | 992 | 26 | 0.00444025 |
| 0.0401613 | 1        | 737 | 16 | 0.00582617 |
| 0.0728127 | 0.841248 | 737 | 16 | 0.00582617 |
| 0.0728235 | 1        | 619 | 18 | 0.00755636 |
| 0.0848235 | 1        | 721 | 20 | 0.00757402 |
| 0.0828235 | 1        | 704 | 18 | 0.00527003 |
| 0.060004  | 1        | 607 | 11 | 0.00880104 |
| 0.0714118 | 1        | 607 | 11 | 0.00880104 |
| 0.0588177 | 1        | 595 | 17 | 0.00965731 |
| 0.07      | 1        | 595 | 17 | 0.00965731 |
| 0.0658049 | 1        | 560 | 10 | 0.00481983 |
| 0.0784706 | 1        | 667 | 19 | 0.00682368 |
| 0.0715797 | 1        | 643 | 11 | 0.00587031 |
| 0.0682632 | 1        | 610 | 15 | 0.00949842 |
| 0.0607635 | 1        | 608 | 17 | 0.00744161 |
| 0.0950588 | 1        | 808 | 22 | 0.00975442 |
| 0.0797647 | 1        | 678 | 13 | 0.00537597 |
| 0.0767059 | 1        | 652 | 18 | 0.00463445 |
| 0.0567349 | 1        | 604 | 17 | 0.00794477 |
| 0.096778  | 1        | 823 | 45 | 0.00475804 |
| 0.0748355 | 1        | 637 | 18 | 0.00720326 |
| 0.0891765 | 1        | 758 | 21 | 0.00645292 |

|           |   |      |    |            |
|-----------|---|------|----|------------|
| 0.0724119 | 1 | 647  | 17 | 0.00779471 |
| 0.0770588 | 1 | 655  | 18 | 0.00786533 |
| 0.0711435 | 1 | 606  | 17 | 0.00995745 |
| 0.0697647 | 1 | 593  | 17 | 0.00685016 |
| 0.0698824 | 1 | 594  | 16 | 0.00986918 |
| 0.0711765 | 1 | 605  | 11 | 0.0099398  |
| 0.0854118 | 1 | 726  | 20 | 0.00568493 |
| 0.0742353 | 1 | 631  | 18 | 0.00741512 |
| 0.0717647 | 1 | 610  | 17 | 0.00733567 |
| 0.0674065 | 1 | 577  | 16 | 0.00632934 |
| 0.0665759 | 1 | 587  | 17 | 0.00772409 |
| 0.0777467 | 1 | 835  | 23 | 0.00590562 |
| 0.0564246 | 1 | 606  | 14 | 0.00809484 |
| 0.0741176 | 1 | 630  | 18 | 0.00658534 |
| 0.0929412 | 1 | 790  | 22 | 0.00739747 |
| 0.0530255 | 1 | 588  | 17 | 0.00965731 |
| 0.0378853 | 1 | 832  | 21 | 0.00631168 |
| 0.0824706 | 1 | 701  | 17 | 0.00761816 |
| 0.0624497 | 1 | 543  | 15 | 0.00956904 |
| 0.0718286 | 1 | 667  | 19 | 0.00562313 |
| 0.0685423 | 1 | 592  | 16 | 0.00847443 |
| 0.0854992 | 1 | 727  | 21 | 0.00503169 |
| 0.0747059 | 1 | 635  | 15 | 0.00722092 |
| 0.0711765 | 1 | 605  | 17 | 0.00698257 |
| 0.0506349 | 1 | 638  | 18 | 0.00599389 |
| 0.0711765 | 1 | 605  | 13 | 0.00916297 |
| 0.101059  | 1 | 859  | 23 | 0.00562313 |
| 0.0723529 | 1 | 615  | 16 | 0.00646175 |
| 0.0511765 | 1 | 435  | 12 | 0.00742395 |
| 0.0697019 | 1 | 594  | 17 | 0.00932187 |
| 0.120842  | 1 | 1028 | 28 | 0.00632934 |
| 0.065939  | 1 | 592  | 16 | 0.00646175 |
| 0.0825962 | 1 | 719  | 18 | 0.00617927 |
| 0.0687184 | 1 | 585  | 17 | 0.00895994 |
| 0.067591  | 1 | 585  | 17 | 0.00895994 |
| 0.0401176 | 1 | 341  | 10 | 0.00912766 |
| 0.107529  | 1 | 914  | 25 | 0.00639996 |
| 0.0547059 | 1 | 465  | 13 | 0.0087216  |
| 0.0697378 | 1 | 601  | 17 | 0.00936601 |
| 0.0303106 | 1 | 606  | 16 | 0.00371639 |
| 0.0961403 | 1 | 822  | 23 | 0.00641761 |
| 0.0952047 | 1 | 814  | 21 | 0.00677071 |
| 0.0793115 | 1 | 682  | 18 | 0.00748574 |
| 0.0339262 | 1 | 597  | 17 | 0.00609099 |
| 0.0701913 | 1 | 620  | 18 | 0.00957787 |
| 0.0787059 | 1 | 669  | 19 | 0.00709733 |
| 0.0717647 | 1 | 610  | 16 | 0.00992214 |

|             |            |     |    |            |
|-------------|------------|-----|----|------------|
| 0.0292823   | 1          | 592 | 17 | 0.00963966 |
| 0.0612339   | 1          | 532 | 15 | 0.00505817 |
| 0.104742    | 1          | 910 | 26 | 0.0025335  |
| 0.0690216   | 1          | 594 | 17 | 0.0068943  |
| 0.0840156   | 1          | 821 | 23 | 0.00552603 |
| 0.0703529   | 1          | 598 | 17 | 0.00747692 |
| 0.0696471   | 1          | 592 | 17 | 0.00565844 |
| 0.0703547   | 1          | 599 | 10 | 0.00957787 |
| 0.0450108   | 1          | 604 | 16 | 0.00963966 |
| 0.0842142   | 1          | 717 | 20 | 0.00533183 |
| 0.0841648   | 1          | 717 | 20 | 0.00533183 |
| 0.0801441   | 1          | 712 | 19 | 0.00666478 |
| 0.0703307   | 1          | 604 | 17 | 0.00898642 |
| 0.0632991   | 1          | 604 | 17 | 0.00898642 |
| 0.050689    | 1          | 629 | 17 | 0.009622   |
| 0.0717647   | 1          | 610 | 11 | 0.00780354 |
| 0.065673    | 1          | 586 | 17 | 0.00920711 |
| 0.0716471   | 1          | 609 | 15 | 0.00518176 |
| 0.0708235   | 1          | 602 | 15 | 0.0089776  |
| 0.0470364   | 1          | 469 | 13 | 0.0064794  |
| 0.0771765   | 1          | 656 | 17 | 0.00688547 |
| 0.0706822   | 1          | 602 | 17 | 0.00916297 |
| 0.000333667 | 0.00498339 | 602 | 17 | 0.00916297 |
| 0.0724706   | 1          | 616 | 15 | 0.00895111 |
| 0.0904706   | 1          | 769 | 20 | 0.00608217 |
| 0.0836471   | 1          | 711 | 20 | 0.00643527 |
| 0.0688235   | 1          | 585 | 17 | 0.00956904 |
| 0.0712954   | 1          | 612 | 17 | 0.00927773 |
| 0.0692941   | 1          | 589 | 12 | 0.00667361 |
| 0.0427059   | 0.536189   | 677 | 19 | 0.00893346 |
| 0.0408652   | 1          | 716 | 20 | 0.0030455  |
| 0.0833333   | 1          | 716 | 20 | 0.0030455  |
| 0.0583265   | 1          | 497 | 13 | 0.00804188 |
| 0.0216471   | 0.338858   | 543 | 11 | 0.00660299 |
| 0.0641176   | 1          | 545 | 13 | 0.0062852  |
| 0.0932941   | 1          | 793 | 20 | 0.00431666 |
| 0.0456582   | 1          | 754 | 21 | 0.00282481 |
| 0.0705882   | 1          | 600 | 13 | 0.00960435 |
| 0.0373606   | 1          | 620 | 16 | 0.0083067  |
| 0.0468213   | 1          | 777 | 16 | 0.00614396 |
| 0.0729412   | 1          | 620 | 17 | 0.00953373 |
| 0.0900901   | 1          | 770 | 21 | 0.00434314 |
| 0.0390315   | 1          | 640 | 18 | 0.00696492 |
| 0.0665882   | 1          | 566 | 12 | 0.00617927 |
| 0.0687182   | 1          | 594 | 17 | 0.00837732 |
| 0.0715294   | 1          | 608 | 18 | 0.00939249 |
| 0.0789412   | 1          | 671 | 19 | 0.00586148 |



|            |           |      |    |            |
|------------|-----------|------|----|------------|
| 0.102624   | 1         | 876  | 24 | 0.00966614 |
| 0.101542   | 1         | 876  | 24 | 0.00966614 |
| 0.119647   | 1         | 1017 | 28 | 0.00736216 |
| 0.137529   | 1         | 1169 | 33 | 0.00713264 |
| 0.0729412  | 1         | 620  | 16 | 0.00850974 |
| 0.0776471  | 1         | 660  | 18 | 0.00772409 |
| 0.0710434  | 1         | 606  | 16 | 0.00866863 |
| 0.109412   | 1         | 930  | 23 | 0.00519059 |
| 0.0871554  | 1         | 743  | 20 | 0.00558783 |
| 0.0687595  | 1         | 587  | 17 | 0.00994862 |
| 0.0691765  | 1         | 588  | 13 | 0.00982504 |
| 0.119598   | 1         | 1118 | 28 | 0.00592327 |
| 0.0705841  | 1         | 609  | 11 | 0.00594975 |
| 0.0745882  | 1         | 634  | 18 | 0.00978973 |
| 0.0955414  | 1         | 825  | 24 | 0.00608217 |
| 0.0717261  | 1         | 620  | 12 | 0.00607334 |
| 0.0381064  | 1         | 359  | 10 | 0.00624989 |
| 0.0585882  | 1         | 498  | 13 | 0.00876573 |
| 0.0354856  | 1         | 593  | 16 | 0.00648823 |
| 0.0472144  | 1         | 789  | 21 | 0.00552603 |
| 0.0799202  | 1         | 681  | 17 | 0.00748574 |
| 0.0749412  | 1         | 637  | 18 | 0.00361046 |
| 0.0708235  | 1         | 602  | 17 | 0.00714147 |
| 0.160706   | 1         | 1366 | 38 | 0.00508466 |
| 0.0709097  | 1         | 654  | 18 | 0.00649706 |
| 0.0700762  | 1         | 607  | 18 | 0.00990449 |
| 0.0792541  | 1         | 680  | 12 | 0.00661182 |
| 0.114588   | 1         | 974  | 28 | 0.00707085 |
| 0.0756471  | 1         | 643  | 18 | 0.00747692 |
| 0.076301   | 1         | 651  | 12 | 0.00423721 |
| 0.0649422  | 1         | 590  | 13 | 0.00931304 |
| 0.0389463  | 1         | 550  | 16 | 0.0089776  |
| 0.0364963  | 1         | 475  | 10 | 0.0083067  |
| 0.0420131  | 1         | 475  | 10 | 0.0083067  |
| 0.0363647  | 1         | 617  | 17 | 0.00918063 |
| 0.0757647  | 1         | 644  | 18 | 0.00874808 |
| 0.0729412  | 1         | 620  | 18 | 0.00986918 |
| 0.0843529  | 1         | 717  | 20 | 0.00992214 |
| 0.138273   | 1         | 1340 | 36 | 0.00765347 |
| 0.0698824  | 1         | 594  | 17 | 0.00932187 |
| 0.0695294  | 1         | 591  | 17 | 0.00970145 |
| 0.0676582  | 1         | 605  | 17 | 0.00899525 |
| 0.00866612 | 0.0731225 | 1012 | 26 | 0.00551721 |
| 0.0395855  | 1         | 615  | 14 | 0.00946311 |
| 0.0727059  | 1         | 618  | 18 | 0.00373404 |
| 0.0689412  | 1         | 586  | 17 | 0.00934835 |
| 0.0807059  | 1         | 686  | 20 | 0.00988683 |

|           |   |      |    |            |
|-----------|---|------|----|------------|
| 0.0862353 | 1 | 733  | 17 | 0.00941897 |
| 0.102706  | 1 | 873  | 24 | 0.00439611 |
| 0.0743299 | 1 | 635  | 13 | 0.00554369 |
| 0.0787059 | 1 | 669  | 19 | 0.00609099 |
| 0.0816731 | 1 | 701  | 17 | 0.00428135 |
| 0.0735708 | 1 | 628  | 17 | 0.00561431 |
| 0.12008   | 1 | 1025 | 27 | 0.0061881  |
| 0.0557248 | 1 | 805  | 22 | 0.00428135 |
| 0.0725882 | 1 | 617  | 17 | 0.00779471 |
| 0.0844706 | 1 | 718  | 20 | 0.005323   |
| 0.0714621 | 1 | 609  | 17 | 0.00957787 |
| 0.0704706 | 1 | 599  | 17 | 0.00927773 |
| 0.0756471 | 1 | 643  | 18 | 0.00508466 |
| 0.111529  | 1 | 948  | 27 | 0.004811   |
| 0.0691765 | 1 | 588  | 17 | 0.00876573 |
| 0.0608338 | 1 | 518  | 13 | 0.00617927 |
| 0.0775294 | 1 | 659  | 17 | 0.0057732  |
| 0.0781012 | 1 | 668  | 12 | 0.00648823 |
| 0.0856438 | 1 | 729  | 19 | 0.0068943  |
| 0.0724944 | 1 | 617  | 17 | 0.00886284 |
| 0.0111878 | 1 | 700  | 20 | 0.00873042 |
| 0.0732499 | 1 | 632  | 14 | 0.00895111 |
| 0.0773064 | 1 | 667  | 19 | 0.00498755 |
| 0.0716471 | 1 | 609  | 17 | 0.00931304 |
| 0.0292408 | 1 | 649  | 19 | 0.00945428 |
| 0.0275738 | 1 | 612  | 18 | 0.00823608 |
| 0.0759122 | 1 | 647  | 15 | 0.00815664 |
| 0.0710588 | 1 | 604  | 17 | 0.00745043 |
| 0.0762274 | 1 | 649  | 18 | 0.00573789 |
| 0.0727059 | 1 | 618  | 17 | 0.00701788 |
| 0.0523487 | 1 | 633  | 18 | 0.00594975 |
| 0.0704706 | 1 | 599  | 17 | 0.00779471 |
| 0.0602003 | 1 | 535  | 15 | 0.00631168 |
| 0.0811668 | 1 | 793  | 21 | 0.00744161 |
| 0.117503  | 1 | 1148 | 32 | 0.00630285 |
| 0.0618812 | 1 | 625  | 18 | 0.00729154 |
| 0.06379   | 1 | 751  | 18 | 0.00496107 |
| 0.0569118 | 1 | 781  | 18 | 0.0060292  |
| 0.087818  | 1 | 749  | 19 | 0.00570258 |
| 0.0924672 | 1 | 901  | 24 | 0.00578203 |
| 0.0265142 | 1 | 605  | 17 | 0.00744161 |
| 0.104353  | 1 | 887  | 19 | 0.00720326 |
| 0.0874253 | 1 | 746  | 20 | 0.00533183 |
| 0.0724706 | 1 | 616  | 17 | 0.00418425 |
| 0.0694118 | 1 | 590  | 17 | 0.009622   |
| 0.0722038 | 1 | 632  | 17 | 0.0076976  |
| 0.0696471 | 1 | 592  | 16 | 0.00965731 |

|           |          |      |    |            |
|-----------|----------|------|----|------------|
| 0.0704706 | 1        | 599  | 13 | 0.0095249  |
| 0.0888432 | 1        | 778  | 22 | 0.00568493 |
| 0.0622992 | 1        | 601  | 15 | 0.00926008 |
| 0.0699    | 1        | 601  | 15 | 0.00926008 |
| 0.0691071 | 1        | 589  | 10 | 0.00753871 |
| 0.0718407 | 1        | 635  | 18 | 0.00620575 |
| 0.0563463 | 1        | 479  | 14 | 0.00635582 |
| 0.0439493 | 1        | 645  | 18 | 0.00645292 |
| 0.0383269 | 1        | 613  | 18 | 0.00904822 |
| 0.0715294 | 1        | 608  | 16 | 0.00820077 |
| 0.0913033 | 1        | 779  | 22 | 0.00422839 |
| 0.085721  | 1        | 730  | 20 | 0.00800657 |
| 0.11594   | 1        | 987  | 27 | 0.00648823 |
| 0.0405717 | 1        | 650  | 17 | 0.00451969 |
| 0.0753487 | 1        | 659  | 14 | 0.00708851 |
| 0.0702595 | 1        | 601  | 17 | 0.00896877 |
| 0.0524151 | 1        | 446  | 12 | 0.00940132 |
| 0.0814118 | 1        | 692  | 19 | 0.00416659 |
| 0.0773202 | 1        | 659  | 19 | 0.00589679 |
| 0.0604247 | 1        | 515  | 15 | 0.00849208 |
| 0.119294  | 1        | 1014 | 26 | 0.00429018 |
| 0.071332  | 1        | 633  | 18 | 0.00685016 |
| 0.0685882 | 1        | 583  | 16 | 0.0087216  |
| 0.0707059 | 1        | 601  | 17 | 0.00720326 |
| 0.076     | 1        | 646  | 18 | 0.00539362 |
| 0.0915294 | 1        | 778  | 18 | 0.00240991 |
| 0.0498824 | 1        | 424  | 12 | 0.0099398  |
| 0.124298  | 1        | 1107 | 23 | 0.00566727 |
| 0.12226   | 0.942186 | 1107 | 23 | 0.00566727 |
| 0.101647  | 1        | 864  | 24 | 0.00434314 |
| 0.1176    | 1        | 1027 | 27 | 0.00615279 |
| 0.0665293 | 1        | 581  | 14 | 0.00630285 |
| 0.0844706 | 1        | 718  | 17 | 0.0067972  |
| 0.0736957 | 1        | 678  | 19 | 0.00412246 |
| 0.044     | 1        | 374  | 11 | 0.00579086 |
| 0.0718824 | 1        | 611  | 17 | 0.00935718 |
| 0.0748235 | 0.912482 | 697  | 20 | 0.00633817 |
| 0.082     | 1        | 697  | 20 | 0.00633817 |
| 0.0995294 | 1        | 846  | 24 | 0.00407832 |
| 0.0995294 | 1        | 846  | 24 | 0.00407832 |
| 0.0825882 | 1        | 702  | 19 | 0.00511114 |
| 0.0718427 | 1        | 632  | 18 | 0.00696492 |
| 0.0733645 | 1        | 628  | 17 | 0.00659416 |
| 0.0422701 | 1        | 610  | 15 | 0.00790946 |
| 0.0543529 | 1        | 462  | 13 | 0.00847443 |
| 0.0662028 | 1        | 647  | 18 | 0.00494342 |
| 0.0737658 | 1        | 647  | 18 | 0.00494342 |

|           |   |      |    |            |
|-----------|---|------|----|------------|
| 0.0689291 | 1 | 587  | 11 | 0.00660299 |
| 0.0698439 | 1 | 595  | 17 | 0.00890698 |
| 0.092167  | 1 | 786  | 21 | 0.00747692 |
| 0.0790441 | 1 | 688  | 18 | 0.00344274 |
| 0.101448  | 1 | 883  | 25 | 0.00752988 |
| 0.0847886 | 1 | 738  | 21 | 0.00607334 |
| 0.0618518 | 1 | 996  | 21 | 0.00893346 |
| 0.0703878 | 1 | 599  | 17 | 0.00374287 |
| 0.0518824 | 1 | 441  | 12 | 0.00599389 |
| 0.0853473 | 1 | 731  | 18 | 0.00596741 |
| 0.0587034 | 1 | 776  | 21 | 0.00701788 |
| 0.0725522 | 1 | 618  | 15 | 0.00683251 |
| 0.0882353 | 1 | 750  | 21 | 0.00444025 |
| 0.125088  | 1 | 1066 | 29 | 0.00254233 |
| 0.107369  | 1 | 915  | 25 | 0.00519941 |
| 0.0982353 | 1 | 835  | 23 | 0.00660299 |
| 0.0641705 | 1 | 581  | 17 | 0.0068943  |
| 0.107323  | 1 | 913  | 25 | 0.00423721 |
| 0.0503886 | 1 | 603  | 12 | 0.00766229 |
| 0.0764706 | 1 | 650  | 12 | 0.00698257 |
| 0.114514  | 1 | 976  | 26 | 0.0057732  |
| 0.114824  | 1 | 976  | 26 | 0.0057732  |
| 0.0922099 | 1 | 870  | 20 | 0.00558783 |
| 0.0881176 | 1 | 749  | 21 | 0.00754754 |
| 0.0708235 | 1 | 602  | 17 | 0.00660299 |
| 0.0767245 | 1 | 654  | 19 | 0.00739747 |
| 0.0722353 | 1 | 614  | 17 | 0.00588796 |
| 0.077965  | 1 | 708  | 19 | 0.00986918 |
| 0.0900975 | 1 | 767  | 21 | 0.00648823 |
| 0.0692651 | 1 | 590  | 16 | 0.00826257 |
| 0.0698521 | 1 | 595  | 12 | 0.00467859 |
| 0.0939188 | 1 | 800  | 22 | 0.00452852 |
| 0.061741  | 1 | 605  | 15 | 0.00786533 |
| 0.0706185 | 1 | 604  | 12 | 0.00889815 |
| 0.0852802 | 1 | 741  | 21 | 0.00653237 |
| 0.0748496 | 1 | 647  | 18 | 0.0083685  |
| 0.0406407 | 1 | 647  | 18 | 0.0083685  |
| 0.0843501 | 1 | 719  | 13 | 0.00698257 |
| 0.0347148 | 1 | 588  | 17 | 0.00999276 |
| 0.101361  | 1 | 864  | 21 | 0.00690313 |
| 0.0594638 | 1 | 743  | 15 | 0.00458149 |
| 0.0985882 | 1 | 838  | 19 | 0.00459031 |
| 0.0763529 | 1 | 649  | 18 | 0.00373404 |
| 0.103882  | 1 | 883  | 25 | 0.00592327 |
| 0.123956  | 1 | 1054 | 30 | 0.00632934 |
| 0.0710357 | 1 | 607  | 17 | 0.00639996 |
| 0.0687059 | 1 | 584  | 15 | 0.0072474  |

|           |   |     |    |            |
|-----------|---|-----|----|------------|
| 0.0702353 | 1 | 597 | 16 | 0.00804188 |
| 0.078461  | 1 | 675 | 19 | 0.00634699 |
| 0.0275117 | 1 | 606 | 17 | 0.00976324 |
| 0.0430148 | 1 | 565 | 16 | 0.00971028 |
| 0.0717348 | 1 | 619 | 14 | 0.00859801 |
| 0.0648575 | 1 | 619 | 14 | 0.00859801 |
| 0.0709412 | 1 | 603 | 16 | 0.00847443 |
| 0.0682881 | 1 | 584 | 16 | 0.00911001 |
| 0.0710588 | 1 | 604 | 12 | 0.0074063  |
| 0.0845783 | 1 | 719 | 20 | 0.00552603 |
| 0.0244528 | 1 | 496 | 14 | 0.00544658 |
| 0.0689493 | 1 | 588 | 16 | 0.00650589 |
| 0.106183  | 1 | 905 | 20 | 0.00195971 |
| 0.078     | 1 | 663 | 19 | 0.00693844 |
| 0.0728235 | 1 | 619 | 16 | 0.00570258 |
| 0.07068   | 1 | 607 | 16 | 0.00895994 |
| 0.099026  | 1 | 854 | 24 | 0.0046168  |
| 0.105867  | 1 | 913 | 25 | 0.00508466 |
| 0.0710588 | 1 | 604 | 10 | 0.00717678 |
| 0.0732941 | 1 | 623 | 17 | 0.00607334 |
| 0.0696991 | 1 | 593 | 17 | 0.00662065 |
| 0.0686899 | 1 | 593 | 17 | 0.00662065 |
| 0.0737647 | 1 | 627 | 16 | 0.0074063  |
| 0.102706  | 1 | 873 | 25 | 0.005835   |
| 0.0736471 | 1 | 626 | 17 | 0.00632934 |
| 0.076511  | 1 | 657 | 14 | 0.00630285 |
| 0.0398943 | 1 | 589 | 17 | 0.00804188 |
| 0.0476158 | 1 | 703 | 20 | 0.00315143 |
| 0.0600142 | 1 | 590 | 16 | 0.00966614 |
| 0.0602668 | 1 | 619 | 16 | 0.00791829 |
| 0.0792941 | 1 | 674 | 16 | 0.00672658 |
| 0.0818426 | 1 | 700 | 19 | 0.00631168 |
| 0.0680149 | 1 | 602 | 17 | 0.00706202 |
| 0.0369742 | 1 | 894 | 23 | 0.00893346 |
| 0.0738824 | 1 | 628 | 15 | 0.00928656 |
| 0.051429  | 1 | 646 | 15 | 0.00986918 |
| 0.0841176 | 1 | 715 | 20 | 0.00556134 |
| 0.0745882 | 1 | 634 | 18 | 0.00707085 |
| 0.103791  | 1 | 909 | 25 | 0.00465211 |
| 0.071135  | 1 | 623 | 12 | 0.00969263 |
| 0.0737532 | 1 | 630 | 18 | 0.00682368 |
| 0.0938824 | 1 | 798 | 22 | 0.00636465 |
| 0.0556231 | 1 | 595 | 16 | 0.00978973 |
| 0.101529  | 1 | 863 | 25 | 0.00515528 |
| 0.0379433 | 1 | 628 | 18 | 0.00810367 |
| 0.0627794 | 1 | 618 | 17 | 0.00670892 |
| 0.0897496 | 1 | 767 | 22 | 0.00363694 |

|           |          |      |    |            |
|-----------|----------|------|----|------------|
| 0.0769412 | 1        | 654  | 18 | 0.00765347 |
| 0.0711921 | 1        | 645  | 18 | 0.00847443 |
| 0.0217801 | 1        | 671  | 19 | 0.00425487 |
| 0.0456577 | 1        | 572  | 17 | 0.00704437 |
| 0.102621  | 1        | 971  | 27 | 0.0063823  |
| 0.0422105 | 0.444858 | 807  | 15 | 0.00631168 |
| 0.0712    | 1        | 712  | 19 | 0.0036546  |
| 0.0757647 | 1        | 644  | 18 | 0.00922477 |
| 0.113095  | 1        | 969  | 26 | 0.00547307 |
| 0.0802353 | 1        | 682  | 18 | 0.00639996 |
| 0.0692641 | 1        | 592  | 17 | 0.00672658 |
| 0.0691602 | 1        | 588  | 16 | 0.00791829 |
| 0.0716471 | 1        | 609  | 16 | 0.00722092 |
| 0.0762353 | 1        | 648  | 19 | 0.00991331 |
| 0.0845882 | 1        | 719  | 13 | 0.00631168 |
| 0.0627059 | 1        | 533  | 15 | 0.00608217 |
| 0.0722353 | 1        | 614  | 17 | 0.00677954 |
| 0.0698824 | 1        | 594  | 17 | 0.00632934 |
| 0.0791765 | 1        | 673  | 19 | 0.00630285 |
| 0.09      | 1        | 765  | 21 | 0.00624989 |
| 0.0712941 | 1        | 606  | 12 | 0.00980738 |
| 0.0707059 | 1        | 601  | 13 | 0.00791829 |
| 0.111294  | 1        | 946  | 27 | 0.00553486 |
| 0.0708235 | 1        | 602  | 15 | 0.00912766 |
| 0.0690588 | 1        | 587  | 17 | 0.00696492 |
| 0.0511765 | 1        | 435  | 13 | 0.00977207 |
| 0.0797647 | 1        | 678  | 17 | 0.00635582 |
| 0.0707059 | 1        | 601  | 17 | 0.00729154 |
| 0.0875294 | 1        | 744  | 21 | 0.00706202 |
| 0.0794118 | 1        | 675  | 14 | 0.00387528 |
| 0.0703529 | 1        | 598  | 17 | 0.00999276 |
| 0.0725882 | 1        | 617  | 16 | 0.00544658 |
| 0.0703529 | 1        | 598  | 17 | 0.00908353 |
| 0.136353  | 1        | 1159 | 33 | 0.0078565  |
| 0.0712941 | 1        | 606  | 17 | 0.00922477 |
| 0.0365358 | 1        | 602  | 17 | 0.00691195 |
| 0.0724706 | 1        | 616  | 18 | 0.00914532 |
| 0.0834607 | 1        | 710  | 19 | 0.00697375 |
| 0.081628  | 1        | 710  | 19 | 0.00697375 |
| 0.0755116 | 1        | 642  | 11 | 0.00979856 |
| 0.0712941 | 1        | 606  | 17 | 0.00635582 |
| 0.0714035 | 0.99026  | 616  | 17 | 0.00885401 |
| 0.0706809 | 1        | 601  | 15 | 0.00630285 |
| 0.0705399 | 1        | 601  | 15 | 0.00630285 |
| 0.074221  | 1        | 636  | 17 | 0.00756519 |
| 0.0729412 | 1        | 620  | 17 | 0.00838615 |
| 0.0407027 | 1        | 658  | 18 | 0.00429018 |

|           |          |      |    |            |
|-----------|----------|------|----|------------|
| 0.0747039 | 1        | 637  | 13 | 0.00697375 |
| 0.0434257 | 1        | 646  | 16 | 0.00581734 |
| 0.0371703 | 1        | 589  | 17 | 0.00719444 |
| 0.0687756 | 1        | 587  | 12 | 0.00701788 |
| 0.0730588 | 1        | 621  | 15 | 0.00646175 |
| 0.125396  | 1        | 1069 | 24 | 0.00587913 |
| 0.076     | 1        | 646  | 13 | 0.00728271 |
| 0.0754341 | 1        | 643  | 12 | 0.00676189 |
| 0.0813218 | 1        | 694  | 19 | 0.00650589 |
| 0.0696991 | 1        | 593  | 17 | 0.00850091 |
| 0.0584232 | 1        | 558  | 15 | 0.00975442 |
| 0.0804706 | 1        | 684  | 19 | 0.00766229 |
| 0.0996747 | 1        | 858  | 23 | 0.00590562 |
| 0.0766072 | 1        | 709  | 20 | 0.00614396 |
| 0.0808235 | 1        | 687  | 18 | 0.00399887 |
| 0.07      | 1        | 595  | 17 | 0.00975442 |
| 0.0357544 | 1        | 605  | 11 | 0.00945428 |
| 0.0675073 | 1        | 605  | 11 | 0.00945428 |
| 0.0702797 | 1        | 603  | 17 | 0.00784767 |
| 0.0729412 | 1        | 620  | 14 | 0.00820077 |
| 0.0836457 | 1        | 714  | 20 | 0.00295722 |
| 0.072     | 1        | 612  | 16 | 0.00901291 |
| 0.0856841 | 1        | 729  | 20 | 0.00587913 |
| 0.0694493 | 1        | 599  | 16 | 0.00770643 |
| 0.0712078 | 1        | 668  | 13 | 0.00758285 |
| 0.078542  | 1        | 668  | 13 | 0.00758285 |
| 0.0725882 | 1        | 617  | 17 | 0.00995745 |
| 0.0725882 | 1        | 617  | 17 | 0.00995745 |
| 0.0373592 | 1        | 597  | 10 | 0.00821843 |
| 0.0930832 | 1        | 794  | 22 | 0.00937483 |
| 0.0698868 | 1        | 599  | 17 | 0.00874808 |
| 0.0755834 | 1        | 651  | 19 | 0.00865981 |
| 0.0960614 | 1        | 839  | 24 | 0.00448438 |
| 0.0863981 | 1        | 740  | 21 | 0.00534065 |
| 0.0635562 | 1        | 598  | 11 | 0.00572907 |
| 0.0620002 | 0.894649 | 598  | 11 | 0.00572907 |
| 0.0724706 | 1        | 616  | 17 | 0.00883636 |
| 0.0754916 | 1        | 645  | 16 | 0.00552603 |
| 0.0757398 | 1        | 645  | 16 | 0.00552603 |
| 0.0674819 | 1        | 596  | 10 | 0.00742395 |
| 0.0745795 | 1        | 634  | 18 | 0.00902173 |
| 0.0838824 | 1        | 713  | 19 | 0.00429901 |
| 0.07      | 1        | 595  | 11 | 0.00949842 |
| 0.07      | 1        | 595  | 11 | 0.00949842 |
| 0.0918824 | 1        | 781  | 22 | 0.00829788 |
| 0.070845  | 1        | 607  | 14 | 0.00670892 |
| 0.0712692 | 1        | 607  | 14 | 0.00670892 |

|           |   |      |    |            |
|-----------|---|------|----|------------|
| 0.0703529 | 1 | 598  | 17 | 0.00861567 |
| 0.066     | 1 | 561  | 15 | 0.00854505 |
| 0.0312258 | 1 | 604  | 17 | 0.00791829 |
| 0.0727592 | 1 | 621  | 12 | 0.00730036 |
| 0.0607356 | 1 | 753  | 14 | 0.00481983 |
| 0.0666237 | 1 | 826  | 23 | 0.00700023 |
| 0.0872168 | 1 | 743  | 19 | 0.00547307 |
| 0.0292143 | 1 | 596  | 16 | 0.00818312 |
| 0.0971765 | 1 | 826  | 23 | 0.00768878 |
| 0.0714118 | 1 | 607  | 17 | 0.00868629 |
| 0.073388  | 1 | 626  | 18 | 0.00439611 |
| 0.0710588 | 1 | 604  | 17 | 0.00991331 |
| 0.0954118 | 1 | 811  | 23 | 0.00911884 |
| 0.0898824 | 1 | 764  | 22 | 0.00614396 |
| 0.103765  | 1 | 882  | 25 | 0.00552603 |
| 0.102648  | 1 | 880  | 24 | 0.00599389 |
| 0.0368683 | 1 | 607  | 17 | 0.00981621 |
| 0.067863  | 1 | 832  | 21 | 0.00649706 |
| 0.106941  | 1 | 909  | 26 | 0.00741512 |
| 0.0711268 | 1 | 606  | 17 | 0.00633817 |
| 0.109089  | 1 | 1025 | 19 | 0.00893346 |
| 0.0469192 | 1 | 597  | 10 | 0.00224219 |
| 0.0685242 | 1 | 605  | 17 | 0.00908353 |
| 0.0635452 | 1 | 608  | 16 | 0.00865981 |
| 0.0689412 | 1 | 586  | 11 | 0.00660299 |
| 0.104657  | 1 | 899  | 24 | 0.00744161 |
| 0.0321932 | 1 | 913  | 26 | 0.00493459 |
| 0.0245416 | 1 | 696  | 20 | 0.00404301 |
| 0.0664546 | 1 | 585  | 17 | 0.0086245  |
| 0.046     | 1 | 391  | 10 | 0.00607334 |
| 0.0711781 | 1 | 609  | 17 | 0.00913649 |
| 0.100471  | 1 | 854  | 24 | 0.00621458 |
| 0.070196  | 1 | 598  | 13 | 0.00855387 |
| 0.0726611 | 1 | 619  | 10 | 0.00971911 |
| 0.029775  | 1 | 651  | 18 | 0.00564962 |
| 0.068662  | 1 | 585  | 17 | 0.00810367 |
| 0.102941  | 1 | 875  | 24 | 0.00493459 |
| 0.0859813 | 1 | 736  | 21 | 0.0048728  |
| 0.0865882 | 1 | 736  | 21 | 0.0048728  |
| 0.0708235 | 1 | 602  | 17 | 0.00946311 |
| 0.0848717 | 1 | 777  | 19 | 0.00957787 |
| 0.0283307 | 1 | 622  | 17 | 0.00621458 |
| 0.0456276 | 1 | 671  | 13 | 0.00599389 |
| 0.0912941 | 1 | 776  | 18 | 0.00630285 |
| 0.0702023 | 1 | 597  | 17 | 0.00659416 |
| 0.0642353 | 1 | 546  | 14 | 0.00931304 |
| 0.0839883 | 1 | 748  | 19 | 0.00572907 |



|            |          |      |    |            |
|------------|----------|------|----|------------|
| 0.0701323  | 1        | 599  | 17 | 0.00793595 |
| 0.0855609  | 1        | 733  | 21 | 0.00745043 |
| 0.148      | 1        | 1258 | 36 | 0.00466094 |
| 0.0669466  | 1        | 590  | 11 | 0.0087216  |
| 0.0958824  | 1        | 815  | 23 | 0.00537597 |
| 0.0718824  | 1        | 611  | 14 | 0.00855387 |
| 0.0325095  | 1        | 538  | 15 | 0.00926008 |
| 0.0569412  | 1        | 484  | 14 | 0.00927773 |
| 0.0714029  | 1        | 994  | 24 | 0.00695609 |
| 0.0962635  | 1        | 827  | 20 | 0.00481983 |
| 0.0698487  | 1        | 600  | 14 | 0.00677954 |
| 0.0781141  | 1        | 671  | 19 | 0.00964849 |
| 0.0514434  | 1        | 613  | 17 | 0.00632934 |
| 0.00844872 | 0.110429 | 652  | 14 | 0.00786533 |
| 0.0765618  | 1        | 652  | 14 | 0.00786533 |
| 0.0872585  | 1        | 980  | 27 | 0.00616161 |
| 0.104968   | 1        | 1010 | 21 | 0.00682368 |
| 0.117936   | 1        | 1010 | 21 | 0.00682368 |
| 0.0714203  | 1        | 619  | 17 | 0.00839498 |
| 0.0679312  | 1        | 616  | 16 | 0.00886284 |
| 0.0398534  | 1        | 598  | 17 | 0.00707968 |
| 0.0688235  | 1        | 585  | 17 | 0.00511997 |
| 0.0721176  | 1        | 613  | 17 | 0.00991331 |
| 0.0569412  | 1        | 484  | 13 | 0.00772409 |
| 0.0751765  | 1        | 639  | 18 | 0.00539362 |
| 0.0831669  | 1        | 708  | 19 | 0.00581734 |
| 0.0739742  | 1        | 631  | 18 | 0.0068943  |
| 0.0911861  | 1        | 778  | 21 | 0.00607334 |
| 0.0857814  | 1        | 730  | 17 | 0.00530534 |
| 0.0635701  | 1        | 672  | 19 | 0.00869511 |
| 0.0740314  | 1        | 642  | 14 | 0.00521707 |
| 0.0709887  | 1        | 611  | 14 | 0.00820077 |
| 0.110941   | 1        | 944  | 26 | 0.00378701 |
| 0.0834118  | 1        | 709  | 20 | 0.00642644 |
| 0.103059   | 1        | 876  | 25 | 0.00527003 |
| 0.0722353  | 1        | 614  | 15 | 0.00610865 |
| 0.0996182  | 1        | 887  | 20 | 0.0056761  |
| 0.0742353  | 1        | 631  | 17 | 0.00590562 |
| 0.0789875  | 1        | 674  | 19 | 0.00765347 |
| 0.0792941  | 1        | 674  | 19 | 0.00765347 |
| 0.0568235  | 1        | 483  | 14 | 0.00972794 |
| 0.0757647  | 1        | 644  | 18 | 0.00600272 |
| 0.07       | 1        | 595  | 17 | 0.00873925 |
| 0.0688602  | 1        | 586  | 12 | 0.00289543 |
| 0.070161   | 1        | 597  | 12 | 0.00704437 |
| 0.0952941  | 1        | 810  | 22 | 0.00392825 |
| 0.0651265  | 1        | 592  | 17 | 0.00832436 |

|           |   |      |    |            |
|-----------|---|------|----|------------|
| 0.0320093 | 1 | 494  | 14 | 0.00900408 |
| 0.06332   | 1 | 555  | 12 | 0.00564962 |
| 0.0721399 | 1 | 623  | 18 | 0.00783884 |
| 0.0492913 | 1 | 772  | 22 | 0.00535831 |
| 0.0395519 | 1 | 685  | 16 | 0.00668244 |
| 0.0805882 | 1 | 685  | 16 | 0.00668244 |
| 0.0768235 | 1 | 653  | 19 | 0.00949842 |
| 0.0689143 | 1 | 603  | 12 | 0.0059321  |
| 0.0710588 | 1 | 604  | 10 | 0.00950725 |
| 0.0650843 | 1 | 606  | 17 | 0.0074063  |
| 0.0978593 | 1 | 832  | 20 | 0.00847443 |
| 0.0978824 | 1 | 832  | 20 | 0.00847443 |
| 0.0779817 | 1 | 663  | 17 | 0.00661182 |
| 0.0858824 | 1 | 730  | 19 | 0.00576437 |
| 0.0677494 | 1 | 730  | 19 | 0.00576437 |
| 0.0707059 | 1 | 601  | 16 | 0.00852739 |
| 0.0986595 | 1 | 839  | 24 | 0.0054201  |
| 0.0853321 | 1 | 740  | 21 | 0.00331915 |
| 0.0721176 | 1 | 613  | 16 | 0.00753871 |
| 0.0811669 | 1 | 690  | 20 | 0.00718561 |
| 0.112824  | 1 | 959  | 27 | 0.00608217 |
| 0.136471  | 1 | 1160 | 28 | 0.00707968 |
| 0.0728235 | 1 | 619  | 14 | 0.00731802 |
| 0.0812297 | 1 | 1078 | 29 | 0.00949842 |
| 0.0614875 | 1 | 816  | 23 | 0.00600272 |
| 0.0153529 | 1 | 596  | 17 | 0.00847443 |
| 0.0140134 | 1 | 544  | 12 | 0.00764464 |
| 0.0173879 | 1 | 675  | 19 | 0.00347805 |
| 0.0158166 | 1 | 614  | 18 | 0.00698257 |
| 0.0157393 | 1 | 611  | 13 | 0.00983387 |
| 0.0190108 | 1 | 738  | 19 | 0.00483749 |
| 0.0717647 | 1 | 610  | 11 | 0.00649706 |
| 0.12566   | 1 | 1071 | 29 | 0.00601155 |
| 0.0793148 | 1 | 676  | 14 | 0.00533183 |
| 0.0382311 | 1 | 619  | 12 | 0.0083685  |
| 0.0527387 | 1 | 544  | 11 | 0.00887167 |
| 0.07173   | 1 | 612  | 17 | 0.00754754 |
| 0.0964604 | 1 | 823  | 22 | 0.00423721 |
| 0.0681224 | 1 | 599  | 17 | 0.00945428 |
| 0.11683   | 1 | 1001 | 20 | 0.00698257 |
| 0.0875235 | 1 | 745  | 21 | 0.00508466 |
| 0.18072   | 1 | 1541 | 39 | 0.00745043 |
| 0.0701835 | 1 | 608  | 17 | 0.00799774 |
| 0.0713029 | 1 | 608  | 17 | 0.00799774 |
| 0.0795337 | 1 | 689  | 20 | 0.00692961 |
| 0.0933568 | 1 | 794  | 23 | 0.00414011 |
| 0.096142  | 1 | 937  | 24 | 0.00761816 |

|           |          |      |    |            |
|-----------|----------|------|----|------------|
| 0.10068   | 1        | 873  | 23 | 0.00600272 |
| 0.0895752 | 1        | 873  | 23 | 0.00600272 |
| 0.0703529 | 1        | 598  | 14 | 0.00396356 |
| 0.0887059 | 1        | 754  | 21 | 0.00481983 |
| 0.0985882 | 1        | 838  | 24 | 0.00434314 |
| 0.118471  | 1        | 1007 | 27 | 0.00572907 |
| 0.0940499 | 1        | 833  | 16 | 0.00620575 |
| 0.0818222 | 1        | 749  | 22 | 0.00305433 |
| 0.0790911 | 1        | 724  | 19 | 0.00694727 |
| 0.117412  | 1        | 998  | 28 | 0.00662065 |
| 0.0972941 | 1        | 827  | 23 | 0.00270122 |
| 0.0691765 | 1        | 588  | 13 | 0.00741512 |
| 0.0697647 | 1        | 593  | 17 | 0.00650589 |
| 0.0859525 | 1        | 897  | 25 | 0.00605568 |
| 0.0977647 | 1        | 831  | 22 | 0.00702671 |
| 0.0695294 | 1        | 591  | 17 | 0.00981621 |
| 0.0334012 | 1        | 607  | 17 | 0.00697375 |
| 0.0798817 | 1        | 702  | 20 | 0.00848325 |
| 0.125278  | 1        | 1070 | 25 | 0.00587913 |
| 0.0700682 | 1        | 596  | 17 | 0.00578203 |
| 0.106631  | 1        | 907  | 24 | 0.00511997 |
| 0.0704639 | 1        | 600  | 15 | 0.00676189 |
| 0.0302676 | 0.431667 | 600  | 15 | 0.00676189 |
| 0.071923  | 1        | 613  | 17 | 0.00986918 |
| 0.114941  | 1        | 977  | 27 | 0.00428135 |
| 0.0643146 | 1        | 937  | 26 | 0.00543776 |
| 0.110235  | 1        | 937  | 26 | 0.00543776 |
| 0.0753655 | 1        | 1098 | 30 | 0.00255116 |
| 0.0818824 | 0.63388  | 1098 | 30 | 0.00255116 |
| 0.0431739 | 1        | 629  | 18 | 0.00554369 |
| 0.0587617 | 1        | 615  | 14 | 0.0076005  |
| 0.0779667 | 1        | 816  | 23 | 0.00755636 |
| 0.0752914 | 1        | 788  | 22 | 0.00744161 |
| 0.127882  | 1        | 1087 | 26 | 0.00617044 |
| 0.106     | 1        | 901  | 19 | 0.00630285 |
| 0.0469341 | 0.453975 | 956  | 27 | 0.0042637  |
| 0.0639126 | 1        | 591  | 17 | 0.00957787 |
| 0.0684546 | 1        | 633  | 18 | 0.00700023 |
| 0.0413444 | 1        | 588  | 17 | 0.0072474  |
| 0.0516333 | 1        | 588  | 17 | 0.0072474  |
| 0.0690588 | 1        | 587  | 14 | 0.00767112 |
| 0.0873741 | 1        | 755  | 21 | 0.0067972  |
| 0.0755605 | 1        | 755  | 21 | 0.0067972  |
| 0.129267  | 1        | 1117 | 31 | 0.00539362 |
| 0.111789  | 1        | 1117 | 31 | 0.00539362 |
| 0.0855665 | 1        | 728  | 20 | 0.00708851 |
| 0.104328  | 1        | 887  | 25 | 0.00959552 |

|           |          |      |    |            |
|-----------|----------|------|----|------------|
| 0.0461819 | 1        | 583  | 15 | 0.00869511 |
| 0.0726335 | 1        | 620  | 15 | 0.00565844 |
| 0.0744706 | 1        | 633  | 18 | 0.00373404 |
| 0.0844658 | 1        | 895  | 19 | 0.00458149 |
| 0.0701176 | 1        | 596  | 17 | 0.00980738 |
| 0.0889757 | 1        | 774  | 21 | 0.00722974 |
| 0.0672941 | 1        | 572  | 14 | 0.00632051 |
| 0.107176  | 1        | 914  | 26 | 0.00405183 |
| 0.101294  | 1        | 861  | 24 | 0.00941014 |
| 0.0706038 | 1        | 642  | 18 | 0.00806836 |
| 0.0716471 | 1        | 609  | 17 | 0.00803305 |
| 0.0743529 | 1        | 632  | 18 | 0.00828022 |
| 0.0949419 | 1        | 809  | 23 | 0.0056761  |
| 0.0725882 | 1        | 617  | 14 | 0.00558783 |
| 0.0720572 | 1        | 655  | 13 | 0.00632934 |
| 0.0607059 | 1        | 516  | 11 | 0.00766229 |
| 0.118353  | 1        | 1006 | 20 | 0.00599389 |
| 0.0696431 | 1        | 599  | 16 | 0.00738864 |
| 0.0828264 | 1        | 708  | 14 | 0.00558783 |
| 0.0705428 | 1        | 603  | 13 | 0.00668244 |
| 0.0553519 | 1        | 604  | 17 | 0.0095867  |
| 0.0904569 | 1        | 782  | 22 | 0.00466976 |
| 0.0889226 | 1        | 761  | 21 | 0.00452852 |
| 0.0399565 | 1        | 588  | 17 | 0.00677954 |
| 0.0698824 | 1        | 594  | 14 | 0.00722974 |
| 0.0797    | 1        | 680  | 20 | 0.00254233 |
| 0.0721176 | 1        | 613  | 17 | 0.00633817 |
| 0.0797647 | 1        | 678  | 19 | 0.00642644 |
| 0.0691196 | 1        | 588  | 16 | 0.00722974 |
| 0.0767059 | 1        | 652  | 18 | 0.00980738 |
| 0.0874648 | 1        | 808  | 21 | 0.00702671 |
| 0.0727059 | 1        | 618  | 17 | 0.00953373 |
| 0.0548069 | 1        | 667  | 15 | 0.00661182 |
| 0.0668151 | 1        | 570  | 14 | 0.00698257 |
| 0.130706  | 1        | 1111 | 31 | 0.00701788 |
| 0.0701176 | 1        | 596  | 17 | 0.00706202 |
| 0.0721819 | 1        | 616  | 18 | 0.00935718 |
| 0.0829412 | 1        | 705  | 18 | 0.00739747 |
| 0.0687837 | 0.832624 | 705  | 18 | 0.00739747 |
| 0.056     | 1        | 476  | 14 | 0.00852739 |
| 0.0717631 | 1        | 613  | 17 | 0.00913649 |
| 0.0709503 | 1        | 604  | 14 | 0.00771526 |
| 0.0812299 | 1        | 708  | 21 | 0.00692961 |
| 0.107294  | 1        | 912  | 19 | 0.00579086 |
| 0.0544706 | 1        | 463  | 13 | 0.00685016 |
| 0.07      | 1        | 595  | 17 | 0.0086245  |
| 0.0811378 | 1        | 696  | 20 | 0.00540245 |

|           |   |     |    |            |
|-----------|---|-----|----|------------|
| 0.0725882 | 1 | 617 | 17 | 0.00899525 |
| 0.0727059 | 1 | 618 | 13 | 0.00662947 |
| 0.0460997 | 1 | 393 | 11 | 0.00986918 |
| 0.0665476 | 1 | 596 | 10 | 0.00681485 |
| 0.0837715 | 1 | 717 | 29 | 0.0071503  |
| 0.075364  | 1 | 647 | 18 | 0.00632934 |
| 0.0726888 | 1 | 618 | 18 | 0.00633817 |
| 0.0885691 | 1 | 757 | 21 | 0.00633817 |
| 0.0644449 | 1 | 613 | 17 | 0.00910118 |
| 0.0712525 | 1 | 607 | 12 | 0.00762698 |
| 0.0595274 | 1 | 587 | 16 | 0.00742395 |
| 0.0706905 | 1 | 602 | 10 | 0.00931304 |
| 0.0458982 | 1 | 616 | 17 | 0.00928656 |
| 0.0716899 | 1 | 627 | 16 | 0.00955139 |
| 0.0827059 | 1 | 703 | 19 | 0.00650589 |
| 0.0805882 | 1 | 685 | 20 | 0.00622341 |
| 0.0717389 | 1 | 611 | 14 | 0.00649706 |
| 0.0931765 | 1 | 792 | 20 | 0.00666478 |
| 0.0742353 | 1 | 631 | 17 | 0.00829788 |
| 0.0692493 | 1 | 631 | 17 | 0.00829788 |
| 0.0711765 | 1 | 605 | 10 | 0.00680602 |
| 0.0693058 | 1 | 597 | 16 | 0.00940132 |
| 0.0677647 | 1 | 576 | 12 | 0.00711499 |
| 0.0940866 | 1 | 821 | 23 | 0.00633817 |
| 0.0749412 | 1 | 637 | 17 | 0.00601155 |
| 0.0652941 | 1 | 555 | 10 | 0.00614396 |
| 0.0849167 | 1 | 724 | 20 | 0.00764464 |
| 0.0685734 | 1 | 585 | 11 | 0.0067972  |
| 0.0692895 | 1 | 590 | 15 | 0.00901291 |
| 0.07      | 1 | 595 | 17 | 0.0099398  |
| 0.0934118 | 1 | 794 | 22 | 0.00562313 |
| 0.0674118 | 1 | 573 | 13 | 0.00660299 |
| 0.0720922 | 1 | 613 | 17 | 0.00648823 |
| 0.0353141 | 1 | 583 | 12 | 0.00909235 |
| 0.0725626 | 1 | 617 | 10 | 0.00957787 |
| 0.0724706 | 1 | 616 | 18 | 0.00926008 |
| 0.0702722 | 1 | 599 | 17 | 0.00564079 |
| 0.0525762 | 1 | 450 | 12 | 0.00975442 |
| 0.0452334 | 1 | 753 | 21 | 0.00466976 |
| 0.0689412 | 1 | 586 | 17 | 0.00591444 |
| 0.100706  | 1 | 856 | 23 | 0.00498755 |
| 0.0756471 | 1 | 643 | 18 | 0.00845677 |
| 0.0756471 | 1 | 643 | 16 | 0.0095867  |
| 0.0564175 | 1 | 480 | 10 | 0.00684133 |
| 0.0543617 | 1 | 597 | 17 | 0.00863332 |
| 0.068377  | 1 | 597 | 17 | 0.00863332 |
| 0.0842439 | 1 | 717 | 20 | 0.00745043 |

|           |   |      |    |            |
|-----------|---|------|----|------------|
| 0.0684706 | 1 | 582  | 17 | 0.00912766 |
| 0.0711268 | 1 | 606  | 15 | 0.00966614 |
| 0.063455  | 1 | 544  | 11 | 0.00647058 |
| 0.0729154 | 1 | 620  | 17 | 0.00885401 |
| 0.0805671 | 1 | 699  | 16 | 0.005579   |
| 0.0703364 | 1 | 598  | 17 | 0.00873042 |
| 0.0453882 | 1 | 404  | 12 | 0.00918063 |
| 0.0705418 | 1 | 608  | 17 | 0.00692078 |
| 0.0729412 | 1 | 620  | 16 | 0.00903939 |
| 0.0720215 | 1 | 616  | 12 | 0.00722092 |
| 0.0418323 | 1 | 905  | 26 | 0.00424604 |
| 0.0695294 | 1 | 591  | 15 | 0.00871277 |
| 0.07      | 1 | 595  | 17 | 0.00943663 |
| 0.0784492 | 1 | 692  | 18 | 0.0056761  |
| 0.0861176 | 1 | 732  | 20 | 0.00892463 |
| 0.0824706 | 1 | 701  | 20 | 0.0066383  |
| 0.0676916 | 1 | 590  | 14 | 0.00972794 |
| 0.0885298 | 1 | 778  | 21 | 0.00993097 |
| 0.0840484 | 1 | 715  | 20 | 0.00415777 |
| 0.0780534 | 1 | 664  | 19 | 0.00240991 |
| 0.0672498 | 1 | 592  | 17 | 0.00902173 |
| 0.0762858 | 1 | 663  | 16 | 0.00659416 |
| 0.0489154 | 1 | 663  | 16 | 0.00659416 |
| 0.0707059 | 1 | 601  | 17 | 0.00779471 |
| 0.0680847 | 1 | 669  | 19 | 0.00692961 |
| 0.0747087 | 1 | 654  | 15 | 0.00617927 |
| 0.0634524 | 1 | 1041 | 30 | 0.00646175 |
| 0.0363891 | 1 | 597  | 17 | 0.00826257 |
| 0.0582091 | 1 | 496  | 14 | 0.00909235 |
| 0.100909  | 1 | 888  | 25 | 0.00635582 |
| 0.123711  | 1 | 1056 | 29 | 0.0066383  |
| 0.0876101 | 1 | 746  | 20 | 0.0062852  |
| 0.0652704 | 1 | 589  | 11 | 0.00718561 |
| 0.0689938 | 1 | 589  | 11 | 0.00718561 |
| 0.0700556 | 1 | 605  | 17 | 0.00953373 |
| 0.0428043 | 1 | 602  | 14 | 0.00549955 |
| 0.0513367 | 1 | 722  | 21 | 0.00572907 |
| 0.071929  | 1 | 616  | 16 | 0.00868629 |
| 0.097343  | 1 | 828  | 23 | 0.00514645 |
| 0.0737311 | 1 | 629  | 16 | 0.00741512 |
| 0.0903529 | 1 | 768  | 21 | 0.00954256 |
| 0.0699317 | 1 | 604  | 17 | 0.00973676 |
| 0.0732532 | 1 | 628  | 18 | 0.00727388 |
| 0.0728235 | 1 | 619  | 17 | 0.00632934 |
| 0.0846518 | 1 | 733  | 21 | 0.00760933 |
| 0.0803717 | 1 | 692  | 19 | 0.00745043 |
| 0.0652672 | 1 | 911  | 25 | 0.00748574 |

|           |          |      |    |            |
|-----------|----------|------|----|------------|
| 0.0783972 | 1        | 675  | 18 | 0.00790946 |
| 0.0508281 | 1        | 666  | 12 | 0.00971028 |
| 0.0776133 | 1        | 666  | 12 | 0.00971028 |
| 0.0447226 | 1        | 586  | 16 | 0.00874808 |
| 0.0682904 | 1        | 586  | 16 | 0.00874808 |
| 0.0963529 | 1        | 819  | 18 | 0.00547307 |
| 0.0953545 | 1        | 819  | 18 | 0.00547307 |
| 0.0705068 | 1        | 601  | 10 | 0.00824491 |
| 0.0831193 | 1        | 712  | 20 | 0.00621458 |
| 0.0373125 | 1        | 617  | 16 | 0.00720326 |
| 0.0724008 | 1        | 617  | 16 | 0.00720326 |
| 0.0451765 | 0.699454 | 549  | 10 | 0.00806836 |
| 0.0696418 | 1        | 593  | 17 | 0.00991331 |
| 0.0710588 | 1        | 604  | 17 | 0.00932187 |
| 0.0968235 | 1        | 823  | 23 | 0.00729154 |
| 0.0532252 | 1        | 453  | 10 | 0.00828905 |
| 0.0695294 | 1        | 591  | 16 | 0.00533183 |
| 0.0748594 | 1        | 639  | 16 | 0.005323   |
| 0.0709927 | 1        | 605  | 17 | 0.00997511 |
| 0.0497647 | 1        | 423  | 12 | 0.00948959 |
| 0.0740914 | 1        | 632  | 18 | 0.00986918 |
| 0.0418419 | 1        | 607  | 16 | 0.00594975 |
| 0.0411525 | 1        | 597  | 13 | 0.00995745 |
| 0.113668  | 1        | 968  | 26 | 0.00324853 |
| 0.0691765 | 1        | 588  | 16 | 0.00932187 |
| 0.0712941 | 1        | 606  | 16 | 0.00800657 |
| 0.0844507 | 1        | 718  | 20 | 0.00561431 |
| 0.0406556 | 1        | 640  | 17 | 0.00379584 |
| 0.0561864 | 1        | 668  | 18 | 0.00645292 |
| 0.0636905 | 1        | 1070 | 29 | 0.00551721 |
| 0.042619  | 1        | 716  | 17 | 0.00406066 |
| 0.0720478 | 1        | 615  | 17 | 0.00981621 |
| 0.120118  | 1        | 1021 | 29 | 0.00547307 |
| 0.110611  | 1        | 959  | 23 | 0.00767112 |
| 0.0711263 | 1        | 605  | 17 | 0.00685899 |
| 0.104941  | 1        | 892  | 18 | 0.00969263 |
| 0.0652786 | 1        | 580  | 16 | 0.00790064 |
| 0.076285  | 1        | 653  | 18 | 0.0088187  |
| 0.0929495 | 1        | 791  | 18 | 0.00589679 |
| 0.0751465 | 1        | 641  | 18 | 0.00960435 |
| 0.0739742 | 1        | 631  | 18 | 0.00742395 |
| 0.0270522 | 1        | 407  | 12 | 0.00631168 |
| 0.0359033 | 1        | 407  | 12 | 0.00631168 |
| 0.0422067 | 1        | 635  | 17 | 0.00741512 |
| 0.0560162 | 1        | 635  | 17 | 0.00741512 |
| 0.0702988 | 1        | 600  | 17 | 0.00832436 |
| 0.077563  | 1        | 662  | 18 | 0.00610865 |

|           |          |      |    |            |
|-----------|----------|------|----|------------|
| 0.110229  | 1        | 944  | 27 | 0.00765347 |
| 0.137059  | 1        | 1165 | 30 | 0.00362811 |
| 0.069446  | 1        | 603  | 17 | 0.00906587 |
| 0.07      | 1        | 595  | 17 | 0.00430783 |
| 0.0702924 | 1        | 601  | 10 | 0.00697375 |
| 0.0672941 | 1        | 572  | 16 | 0.0084656  |
| 0.0549044 | 1        | 609  | 17 | 0.00972794 |
| 0.0498519 | 1        | 808  | 23 | 0.0056761  |
| 0.0715878 | 1        | 610  | 16 | 0.00824491 |
| 0.072     | 1        | 612  | 17 | 0.00800657 |
| 0.0768235 | 1        | 653  | 19 | 0.00955139 |
| 0.0708235 | 1        | 602  | 17 | 0.00849208 |
| 0.0420956 | 1        | 597  | 17 | 0.00758285 |
| 0.0784774 | 1        | 668  | 16 | 0.00555251 |
| 0.0918824 | 1        | 781  | 19 | 0.00430783 |
| 0.0757647 | 1        | 644  | 18 | 0.00983387 |
| 0.0734118 | 1        | 624  | 18 | 0.00998393 |
| 0.0713362 | 1        | 607  | 17 | 0.00720326 |
| 0.0705882 | 1        | 600  | 11 | 0.00828022 |
| 0.0771765 | 1        | 656  | 19 | 0.0087216  |
| 0.0685882 | 1        | 583  | 16 | 0.00863332 |
| 0.0800705 | 1        | 681  | 18 | 0.00758285 |
| 0.0872941 | 1        | 742  | 18 | 0.0046168  |
| 0.0939472 | 1        | 804  | 22 | 0.00630285 |
| 0.0424706 | 0.366126 | 986  | 21 | 0.00504935 |
| 0.0868556 | 1        | 748  | 21 | 0.00716795 |
| 0.0496272 | 1        | 792  | 16 | 0.00412246 |
| 0.0943396 | 1        | 810  | 23 | 0.00650589 |
| 0.0700809 | 1        | 598  | 11 | 0.00515528 |
| 0.062967  | 1        | 986  | 24 | 0.00802422 |
| 0.0776471 | 1        | 660  | 19 | 0.00437845 |
| 0.0322124 | 1        | 387  | 11 | 0.00617044 |
| 0.0697647 | 1        | 593  | 17 | 0.00915415 |
| 0.0653989 | 1        | 564  | 15 | 0.00775057 |
| 0.0643529 | 1        | 547  | 16 | 0.0081125  |
| 0.046913  | 1        | 791  | 20 | 0.00632934 |
| 0.0697946 | 1        | 598  | 17 | 0.00733567 |
| 0.0718824 | 1        | 611  | 13 | 0.00599389 |
| 0.0710344 | 1        | 605  | 17 | 0.0095867  |
| 0.0711765 | 1        | 605  | 17 | 0.0095867  |
| 0.0715031 | 1        | 617  | 18 | 0.00639996 |
| 0.0814695 | 1        | 703  | 20 | 0.00682368 |
| 0.126484  | 1        | 1076 | 28 | 0.00563196 |
| 0.0699123 | 1        | 606  | 15 | 0.00874808 |
| 0.0652849 | 1        | 841  | 19 | 0.00590562 |
| 0.0643529 | 1        | 547  | 14 | 0.00990449 |
| 0.0675048 | 1        | 596  | 13 | 0.00658534 |



|           |   |      |    |            |
|-----------|---|------|----|------------|
| 0.0792842 | 1 | 700  | 20 | 0.00986918 |
| 0.0694769 | 1 | 595  | 15 | 0.00874808 |
| 0.0921271 | 1 | 942  | 27 | 0.00452852 |
| 0.109003  | 1 | 1080 | 30 | 0.00556134 |
| 0.079021  | 1 | 1017 | 22 | 0.00713264 |
| 0.103811  | 1 | 918  | 23 | 0.00632934 |
| 0.0672688 | 1 | 648  | 15 | 0.00379584 |
| 0.074318  | 1 | 632  | 18 | 0.00969263 |
| 0.0752145 | 1 | 640  | 17 | 0.00751223 |
| 0.0674949 | 1 | 728  | 18 | 0.00555251 |
| 0.0878622 | 1 | 755  | 21 | 0.00949842 |
| 0.0665128 | 1 | 605  | 17 | 0.00515528 |
| 0.0688215 | 1 | 626  | 18 | 0.00741512 |
| 0.0845461 | 1 | 732  | 20 | 0.00549072 |
| 0.0963529 | 1 | 819  | 23 | 0.00609982 |
| 0.0863529 | 1 | 734  | 18 | 0.00874808 |
| 0.0802353 | 1 | 682  | 19 | 0.00831553 |
| 0.0707059 | 1 | 601  | 17 | 0.00888049 |
| 0.113958  | 1 | 974  | 27 | 0.00614396 |
| 0.0755159 | 1 | 644  | 18 | 0.00681485 |
| 0.0689935 | 1 | 595  | 16 | 0.00641761 |
| 0.0487189 | 1 | 637  | 18 | 0.00657651 |
| 0.0727059 | 1 | 618  | 17 | 0.00752988 |
| 0.0719568 | 1 | 613  | 15 | 0.00666478 |
| 0.0750588 | 1 | 638  | 18 | 0.00758285 |
| 0.0882353 | 1 | 750  | 18 | 0.00594975 |
| 0.0333978 | 1 | 604  | 13 | 0.00635582 |
| 0.0689374 | 1 | 591  | 12 | 0.0054201  |
| 0.0592173 | 1 | 637  | 18 | 0.00620575 |
| 0.0709236 | 1 | 622  | 18 | 0.00936601 |
| 0.0754571 | 1 | 879  | 21 | 0.00634699 |
| 0.0447169 | 1 | 879  | 21 | 0.00634699 |
| 0.068394  | 1 | 945  | 22 | 0.00690313 |
| 0.0608235 | 1 | 517  | 15 | 0.0052259  |
| 0.0817499 | 1 | 697  | 20 | 0.00649706 |
| 0.0824598 | 1 | 708  | 19 | 0.00609982 |
| 0.0764644 | 1 | 654  | 13 | 0.00852739 |
| 0.0177533 | 1 | 580  | 16 | 0.00608217 |
| 0.0652102 | 1 | 591  | 17 | 0.00882753 |
| 0.0646119 | 1 | 805  | 19 | 0.00652354 |
| 0.0918824 | 1 | 781  | 22 | 0.00595858 |
| 0.0364206 | 1 | 663  | 12 | 0.00739747 |
| 0.0665796 | 1 | 663  | 12 | 0.00739747 |
| 0.0329049 | 1 | 599  | 12 | 0.00993097 |
| 0.0601526 | 1 | 599  | 12 | 0.00993097 |
| 0.0218245 | 1 | 628  | 11 | 0.00741512 |
| 0.0766407 | 1 | 668  | 15 | 0.00806836 |

|            |           |      |    |            |
|------------|-----------|------|----|------------|
| 0.0991415  | 1         | 843  | 19 | 0.00698257 |
| 0.0685054  | 1         | 611  | 11 | 0.00538479 |
| 0.078598   | 1         | 675  | 14 | 0.00553486 |
| 0.0647769  | 1         | 553  | 16 | 0.00873042 |
| 0.0360686  | 0.55877   | 553  | 16 | 0.00873042 |
| 0.0722403  | 1         | 623  | 17 | 0.00735333 |
| 0.0494072  | 1         | 821  | 22 | 0.00558783 |
| 0.0965882  | 1         | 821  | 22 | 0.00558783 |
| 0.0704706  | 1         | 599  | 10 | 0.00963083 |
| 0.122225   | 1         | 1079 | 26 | 0.00552603 |
| 0.120526   | 1         | 1064 | 29 | 0.0048728  |
| 0.0749412  | 1         | 637  | 18 | 0.00745926 |
| 0.0688197  | 1         | 586  | 16 | 0.00844794 |
| 0.0986494  | 1         | 840  | 19 | 0.00634699 |
| 0.0691765  | 1         | 588  | 17 | 0.00878339 |
| 0.0727532  | 1         | 816  | 23 | 0.00720326 |
| 0.0667796  | 1         | 749  | 20 | 0.00698257 |
| 0.0737647  | 1         | 627  | 18 | 0.00572024 |
| 0.032511   | 1         | 593  | 17 | 0.00989566 |
| 0.0786556  | 1         | 674  | 19 | 0.0094278  |
| 0.0626398  | 1         | 588  | 16 | 0.00510231 |
| 0.0721047  | 1         | 617  | 18 | 0.00849208 |
| 0.00764706 | 0.10467   | 621  | 17 | 0.0052259  |
| 0.0632978  | 1         | 605  | 17 | 0.00832436 |
| 0.09892    | 1         | 861  | 21 | 0.0080154  |
| 0.0371886  | 1         | 609  | 14 | 0.00717678 |
| 0.0454759  | 1         | 388  | 11 | 0.00592327 |
| 0.0860128  | 1         | 741  | 19 | 0.00935718 |
| 0.0869616  | 1         | 741  | 19 | 0.00935718 |
| 0.0712941  | 1         | 606  | 12 | 0.00802422 |
| 0.07       | 1         | 595  | 17 | 0.00558783 |
| 0.0794321  | 0.788126  | 859  | 25 | 0.00570258 |
| 0.0319737  | 0.316647  | 859  | 25 | 0.00570258 |
| 0.0712941  | 1         | 606  | 17 | 0.00926008 |
| 0.0964419  | 1         | 824  | 23 | 0.00764464 |
| 0.0690381  | 1         | 590  | 16 | 0.00975442 |
| 0.0568042  | 1         | 599  | 15 | 0.00957787 |
| 0.0558559  | 1         | 589  | 17 | 0.00999276 |
| 0.0702538  | 1         | 598  | 17 | 0.00930421 |
| 0.0728235  | 1         | 619  | 17 | 0.00683251 |
| 0.0922353  | 1         | 784  | 19 | 0.0054201  |
| 0.0988567  | 1         | 856  | 23 | 0.00730036 |
| 0.0654468  | 1         | 583  | 14 | 0.00931304 |
| 0.058699   | 1         | 499  | 12 | 0.00908353 |
| 0.0673603  | 1         | 615  | 17 | 0.0077594  |
| 0.0702388  | 1         | 603  | 17 | 0.0083685  |
| 0.00585666 | 0.0978441 | 603  | 17 | 0.0083685  |

|           |          |      |    |            |
|-----------|----------|------|----|------------|
| 0.0382389 | 1        | 588  | 13 | 0.00950725 |
| 0.0453547 | 1        | 599  | 17 | 0.00914532 |
| 0.0693572 | 1        | 916  | 26 | 0.00617927 |
| 0.0393189 | 1        | 635  | 18 | 0.00423721 |
| 0.0765252 | 1        | 651  | 19 | 0.00539362 |
| 0.0380881 | 1        | 608  | 16 | 0.00946311 |
| 0.0611765 | 1        | 520  | 13 | 0.00760933 |
| 0.0701978 | 1        | 607  | 15 | 0.00792712 |
| 0.0742353 | 1        | 631  | 18 | 0.00944545 |
| 0.0635003 | 1        | 611  | 16 | 0.00743278 |
| 0.0734689 | 1        | 625  | 15 | 0.00866863 |
| 0.0749412 | 1        | 637  | 18 | 0.00557017 |
| 0.0620788 | 1        | 608  | 17 | 0.00791829 |
| 0.0724706 | 1        | 616  | 11 | 0.00649706 |
| 0.102627  | 1        | 875  | 22 | 0.0086245  |
| 0.0973805 | 1        | 829  | 20 | 0.0041048  |
| 0.0721176 | 1        | 613  | 17 | 0.00922477 |
| 0.0368211 | 1        | 341  | 10 | 0.00900408 |
| 0.0326547 | 1        | 478  | 13 | 0.00782119 |
| 0.0703529 | 1        | 598  | 17 | 0.00957787 |
| 0.0770588 | 1        | 655  | 16 | 0.009622   |
| 0.0455914 | 1        | 651  | 17 | 0.00831553 |
| 0.0707059 | 1        | 601  | 17 | 0.00837732 |
| 0.0691765 | 1        | 588  | 17 | 0.0095249  |
| 0.125936  | 1        | 1076 | 29 | 0.00621458 |
| 0.0800418 | 1        | 689  | 19 | 0.00330149 |
| 0.0556601 | 1        | 680  | 15 | 0.00594975 |
| 0.0593435 | 1        | 725  | 17 | 0.00570258 |
| 0.0323852 | 1        | 764  | 21 | 0.00589679 |
| 0.0723529 | 1        | 615  | 12 | 0.0093307  |
| 0.0719508 | 1        | 620  | 14 | 0.00690313 |
| 0.0419243 | 0.790233 | 901  | 21 | 0.00571141 |
| 0.0703304 | 1        | 613  | 17 | 0.00849208 |
| 0.0973087 | 1        | 828  | 23 | 0.00857153 |
| 0.0708328 | 1        | 603  | 17 | 0.00783884 |
| 0.0709412 | 1        | 603  | 17 | 0.00783884 |
| 0.0721674 | 1        | 614  | 17 | 0.0087216  |
| 0.0722353 | 1        | 614  | 17 | 0.0087216  |
| 0.0809235 | 1        | 694  | 18 | 0.00745043 |
| 0.0756663 | 1        | 653  | 18 | 0.00883636 |
| 0.042915  | 1        | 593  | 16 | 0.00932187 |
| 0.0708235 | 1        | 602  | 11 | 0.00780354 |
| 0.0205839 | 1        | 588  | 16 | 0.0099398  |
| 0.0916471 | 1        | 779  | 22 | 0.00972794 |
| 0.0415242 | 1        | 583  | 16 | 0.00493459 |
| 0.0685882 | 1        | 583  | 16 | 0.00493459 |
| 0.0831765 | 1        | 707  | 20 | 0.00498755 |

|            |           |      |    |            |
|------------|-----------|------|----|------------|
| 0.00176471 | 0.0212164 | 707  | 20 | 0.00498755 |
| 0.0710421  | 1         | 604  | 32 | 0.00947194 |
| 0.0902353  | 1         | 767  | 21 | 0.00972794 |
| 0.130746   | 1         | 1132 | 31 | 0.00412246 |
| 0.0465662  | 1         | 615  | 18 | 0.00928656 |
| 0.0469448  | 1         | 620  | 17 | 0.00991331 |
| 0.014966   | 1         | 588  | 17 | 0.00581734 |
| 0.0752259  | 1         | 641  | 16 | 0.00650589 |
| 0.0753674  | 1         | 641  | 16 | 0.00650589 |
| 0.0920823  | 1         | 792  | 21 | 0.00967497 |
| 0.0417647  | 1         | 355  | 10 | 0.00943663 |
| 0.0314334  | 1         | 391  | 11 | 0.00911001 |
| 0.0699579  | 1         | 598  | 16 | 0.00829788 |
| 0.0244536  | 0.377926  | 598  | 16 | 0.00829788 |
| 0.108118   | 1         | 919  | 26 | 0.00966614 |
| 0.0647545  | 1         | 745  | 18 | 0.00743278 |
| 0.0454118  | 0.895592  | 431  | 12 | 0.00871277 |
| 0.0341973  | 1         | 723  | 20 | 0.00842146 |
| 0.0850588  | 1         | 723  | 17 | 0.00986918 |
| 0.0717647  | 1         | 610  | 15 | 0.00850974 |
| 0.107716   | 1         | 920  | 26 | 0.0076005  |
| 0.0705882  | 1         | 600  | 17 | 0.00972794 |
| 0.0724706  | 1         | 616  | 13 | 0.00888932 |
| 0.0364972  | 1         | 601  | 13 | 0.00955139 |
| 0.0697647  | 1         | 593  | 17 | 0.00662947 |
| 0.0644855  | 1         | 747  | 20 | 0.00518176 |
| 0.0422353  | 1         | 359  | 10 | 0.00570258 |
| 0.114471   | 1         | 973  | 27 | 0.00936601 |
| 0.0417149  | 1         | 612  | 18 | 0.00706202 |
| 0.0697647  | 1         | 593  | 17 | 0.00850091 |
| 0.0787256  | 1         | 682  | 15 | 0.00607334 |
| 0.0670926  | 1         | 693  | 16 | 0.00610865 |
| 0.0688725  | 1         | 587  | 17 | 0.00847443 |
| 0.086518   | 1         | 935  | 21 | 0.00761816 |
| 0.0704013  | 1         | 607  | 17 | 0.00931304 |
| 0.0966133  | 1         | 833  | 23 | 0.00903939 |
| 0.143983   | 1         | 1224 | 28 | 0.00385763 |
| 0.143091   | 1         | 1224 | 28 | 0.00385763 |
| 0.0912941  | 1         | 776  | 22 | 0.00552603 |
| 0.0716205  | 1         | 613  | 17 | 0.00540245 |
| 0.108941   | 1         | 926  | 26 | 0.00515528 |
| 0.0734425  | 1         | 659  | 16 | 0.00549955 |
| 0.0764058  | 1         | 659  | 16 | 0.00549955 |
| 0.0398402  | 1         | 339  | 10 | 0.00972794 |
| 0.0717647  | 1         | 610  | 16 | 0.0069914  |
| 0.0705716  | 1         | 600  | 13 | 0.00682368 |
| 0.0933866  | 1         | 795  | 23 | 0.00423721 |

|           |          |      |    |            |
|-----------|----------|------|----|------------|
| 0.0933866 | 1        | 795  | 23 | 0.00423721 |
| 0.0715294 | 1        | 608  | 17 | 0.00756519 |
| 0.128763  | 1        | 1095 | 30 | 0.00761816 |
| 0.0772941 | 1        | 657  | 18 | 0.00693844 |
| 0.0789381 | 1        | 675  | 12 | 0.00308963 |
| 0.0557486 | 1        | 738  | 19 | 0.00514645 |
| 0.0744058 | 1        | 648  | 18 | 0.00880987 |
| 0.0703235 | 1        | 600  | 17 | 0.00817429 |
| 0.0918691 | 1        | 783  | 22 | 0.00880987 |
| 0.07505   | 1        | 638  | 18 | 0.00575555 |
| 0.120343  | 1        | 1040 | 29 | 0.00544658 |
| 0.0714787 | 1        | 611  | 14 | 0.00600272 |
| 0.0703529 | 1        | 598  | 17 | 0.00920711 |
| 0.0658018 | 1        | 563  | 13 | 0.00920711 |
| 0.0830996 | 1        | 711  | 19 | 0.00747692 |
| 0.0291335 | 1        | 625  | 12 | 0.00829788 |
| 0.0872941 | 1        | 742  | 21 | 0.00648823 |
| 0.0787078 | 1        | 709  | 20 | 0.00558783 |
| 0.0682353 | 1        | 580  | 16 | 0.00949842 |
| 0.11547   | 1        | 989  | 27 | 0.00648823 |
| 0.0629579 | 1        | 593  | 15 | 0.00981621 |
| 0.0672573 | 1        | 744  | 21 | 0.005323   |
| 0.0772106 | 1        | 661  | 18 | 0.00693844 |
| 0.0620255 | 0.532598 | 997  | 26 | 0.00632051 |
| 0.0702353 | 1        | 597  | 17 | 0.0086245  |
| 0.0698659 | 1        | 594  | 17 | 0.00736216 |
| 0.066139  | 1        | 869  | 24 | 0.00745043 |
| 0.0672941 | 1        | 572  | 15 | 0.00982504 |
| 0.041925  | 1        | 595  | 11 | 0.00930421 |
| 0.0663754 | 1        | 942  | 24 | 0.00698257 |
| 0.127899  | 1        | 1092 | 27 | 0.00418425 |
| 0.0806981 | 1        | 689  | 18 | 0.00622341 |
| 0.0431058 | 1        | 634  | 15 | 0.00413128 |
| 0.068     | 0.9248   | 625  | 18 | 0.00936601 |
| 0.0707047 | 1        | 607  | 15 | 0.0068943  |
| 0.0930693 | 1        | 799  | 18 | 0.00761816 |
| 0.088643  | 1        | 761  | 20 | 0.00981621 |
| 0.0766366 | 1        | 1029 | 29 | 0.00481983 |
| 0.086     | 1        | 731  | 19 | 0.00217157 |
| 0.126706  | 1        | 1077 | 29 | 0.00340743 |
| 0.0369589 | 1        | 596  | 17 | 0.0092689  |
| 0.0370532 | 1        | 596  | 17 | 0.0092689  |
| 0.122752  | 1        | 1051 | 29 | 0.00765347 |
| 0.122337  | 1        | 1051 | 29 | 0.00765347 |
| 0.0919648 | 1        | 784  | 16 | 0.00635582 |
| 0.0706    | 1        | 779  | 22 | 0.00748574 |
| 0.077864  | 1        | 662  | 18 | 0.00739747 |

|             |            |      |    |            |
|-------------|------------|------|----|------------|
| 0.0762174   | 1          | 648  | 14 | 0.00558783 |
| 0.0892731   | 1          | 759  | 21 | 0.00687664 |
| 0.0266334   | 1          | 598  | 13 | 0.00702671 |
| 0.0703529   | 1          | 598  | 13 | 0.00702671 |
| 0.118378    | 1          | 1010 | 28 | 0.00680602 |
| 0.103561    | 1          | 884  | 24 | 0.00434314 |
| 0.160235    | 1          | 1362 | 33 | 0.00299253 |
| 0.10362     | 1          | 896  | 21 | 0.00345156 |
| 0.0722934   | 1          | 615  | 16 | 0.00957787 |
| 0.0715294   | 1          | 608  | 11 | 0.00715913 |
| 0.0755294   | 1          | 642  | 17 | 0.00761816 |
| 0.0710588   | 1          | 604  | 17 | 0.00949842 |
| 0.0747059   | 1          | 635  | 18 | 0.00870394 |
| 0.0564293   | 1          | 592  | 17 | 0.00939249 |
| 0.0584654   | 1          | 605  | 17 | 0.00901291 |
| 0.0825882   | 1          | 702  | 15 | 0.00488162 |
| 0.0736471   | 1          | 626  | 18 | 0.00956904 |
| 0.0761636   | 1          | 648  | 18 | 0.00671775 |
| 0.0859183   | 1          | 734  | 21 | 0.00698257 |
| 0.0701176   | 1          | 596  | 13 | 0.00720326 |
| 0.0630149   | 1          | 589  | 16 | 0.00889815 |
| 0.0821789   | 1          | 700  | 20 | 0.00693844 |
| 0.0690027   | 1          | 640  | 18 | 0.00677954 |
| 0.050781    | 1          | 686  | 19 | 0.00728271 |
| 0.0953101   | 1          | 819  | 23 | 0.0052259  |
| 0.0345628   | 1          | 819  | 23 | 0.0052259  |
| 0.0689412   | 1          | 586  | 14 | 0.00976324 |
| 0.0905248   | 1          | 771  | 19 | 0.00523472 |
| 0.0692732   | 1          | 590  | 17 | 0.00876573 |
| 0.0702538   | 1          | 598  | 13 | 0.00853622 |
| 0.1085      | 1          | 928  | 26 | 0.00630285 |
| 0.0806433   | 1          | 702  | 20 | 0.00589679 |
| 0.0517221   | 1          | 440  | 11 | 0.00747692 |
| 0.0734884   | 1          | 632  | 17 | 0.00876573 |
| 0.100118    | 1          | 851  | 24 | 0.00747692 |
| 0.000470588 | 0.00590842 | 677  | 19 | 0.00584382 |
| 0.0796471   | 1          | 677  | 19 | 0.00584382 |
| 0.0406088   | 1          | 595  | 11 | 0.00383115 |
| 0.0613908   | 1          | 595  | 11 | 0.00383115 |
| 0.0896471   | 1          | 762  | 21 | 0.00935718 |
| 0.0710588   | 1          | 604  | 11 | 0.00730919 |
| 0.0710588   | 1          | 604  | 11 | 0.00730919 |
| 0.0743529   | 1          | 632  | 18 | 0.00534065 |
| 0.0747059   | 1          | 635  | 18 | 0.00982504 |
| 0.0779175   | 1          | 663  | 18 | 0.00566727 |
| 0.0742353   | 1          | 631  | 13 | 0.00491693 |
| 0.0742353   | 1          | 631  | 13 | 0.00491693 |

|           |          |     |    |            |
|-----------|----------|-----|----|------------|
| 0.0712941 | 1        | 606 | 14 | 0.00909235 |
| 0.0786635 | 1        | 671 | 13 | 0.00791829 |
| 0.0542636 | 1        | 749 | 21 | 0.00435197 |
| 0.0702353 | 1        | 597 | 14 | 0.00698257 |
| 0.0729412 | 1        | 620 | 17 | 0.0095249  |
| 0.109873  | 1        | 937 | 26 | 0.00385763 |
| 0.0697647 | 1        | 593 | 17 | 0.00652354 |
| 0.0812941 | 1        | 691 | 19 | 0.00677954 |
| 0.0707059 | 1        | 601 | 17 | 0.00910118 |
| 0.0492744 | 1        | 601 | 17 | 0.00910118 |
| 0.0392335 | 1        | 606 | 17 | 0.00457266 |
| 0.0506975 | 1        | 785 | 22 | 0.00680602 |
| 0.0808235 | 1        | 687 | 19 | 0.00647058 |
| 0.0796471 | 1        | 677 | 19 | 0.0054201  |
| 0.090089  | 1        | 769 | 22 | 0.0067972  |
| 0.0693906 | 1        | 591 | 12 | 0.00820077 |
| 0.0737647 | 1        | 627 | 17 | 0.00617927 |
| 0.0737127 | 1        | 627 | 17 | 0.00617927 |
| 0.0557686 | 1        | 509 | 12 | 0.00849208 |
| 0.0744706 | 1        | 633 | 11 | 0.00788298 |
| 0.0455221 | 1        | 613 | 14 | 0.00886284 |
| 0.0699965 | 1        | 597 | 17 | 0.00866863 |
| 0.0395335 | 0.567839 | 597 | 17 | 0.00828905 |
| 0.0708864 | 1        | 607 | 17 | 0.00971028 |
| 0.0755294 | 1        | 642 | 18 | 0.0056761  |
| 0.0556013 | 1        | 473 | 11 | 0.0095867  |
| 0.0714507 | 1        | 924 | 25 | 0.00623224 |
| 0.0712204 | 1        | 611 | 17 | 0.00850974 |
| 0.0791219 | 1        | 692 | 13 | 0.00633817 |
| 0.0250587 | 1        | 608 | 16 | 0.00761816 |
| 0.0723529 | 1        | 615 | 15 | 0.00986035 |
| 0.0511938 | 1        | 446 | 13 | 0.00831553 |
| 0.0746076 | 1        | 637 | 18 | 0.00893346 |
| 0.068917  | 1        | 588 | 17 | 0.009622   |
| 0.0548922 | 1        | 616 | 12 | 0.00848325 |
| 0.0653438 | 1        | 652 | 19 | 0.00896877 |
| 0.0841176 | 1        | 715 | 15 | 0.00635582 |
| 0.0630408 | 1        | 612 | 14 | 0.00978973 |
| 0.0928235 | 1        | 789 | 21 | 0.00696492 |
| 0.0745882 | 1        | 634 | 18 | 0.00598506 |
| 0.0700011 | 1        | 634 | 18 | 0.00598506 |
| 0.0676357 | 1        | 577 | 16 | 0.00954256 |
| 0.0669607 | 1        | 577 | 16 | 0.00954256 |
| 0.0749412 | 1        | 637 | 18 | 0.00552603 |
| 0.0737647 | 1        | 627 | 15 | 0.00566727 |
| 0.0573659 | 1        | 676 | 19 | 0.00423721 |
| 0.0542225 | 1        | 748 | 21 | 0.00682368 |

|           |          |      |    |            |
|-----------|----------|------|----|------------|
| 0.0747126 | 1        | 637  | 15 | 0.00871277 |
| 0.0712941 | 1        | 606  | 13 | 0.00944545 |
| 0.0811214 | 1        | 761  | 22 | 0.00527886 |
| 0.0749235 | 1        | 637  | 14 | 0.00574672 |
| 0.0787059 | 1        | 669  | 16 | 0.00508466 |
| 0.0239628 | 1        | 655  | 19 | 0.0062852  |
| 0.0309459 | 1        | 655  | 19 | 0.00847443 |
| 0.0768846 | 1        | 922  | 26 | 0.00562313 |
| 0.0725231 | 1        | 620  | 16 | 0.00847443 |
| 0.0689412 | 1        | 586  | 12 | 0.0087216  |
| 0.044315  | 1        | 723  | 21 | 0.00389294 |
| 0.0843345 | 1        | 723  | 21 | 0.00389294 |
| 0.0427646 | 1        | 594  | 17 | 0.00874808 |
| 0.0301116 | 1        | 591  | 11 | 0.00765347 |
| 0.0761122 | 1        | 1047 | 29 | 0.00581734 |
| 0.0748235 | 1        | 636  | 16 | 0.00650589 |
| 0.0872941 | 1        | 742  | 20 | 0.00591444 |
| 0.0809412 | 1        | 688  | 20 | 0.0056761  |
| 0.0891765 | 1        | 758  | 22 | 0.00539362 |
| 0.0713446 | 1        | 607  | 17 | 0.00928656 |
| 0.0712857 | 1        | 606  | 15 | 0.00912766 |
| 0.0685206 | 1        | 616  | 18 | 0.00912766 |
| 0.070758  | 1        | 603  | 12 | 0.00986918 |
| 0.0749412 | 1        | 637  | 18 | 0.00720326 |
| 0.0721625 | 1        | 618  | 17 | 0.00965731 |
| 0.0709412 | 1        | 603  | 17 | 0.00931304 |
| 0.0913038 | 1        | 778  | 17 | 0.00748574 |
| 0.0621756 | 1        | 539  | 10 | 0.00268357 |
| 0.0247095 | 1        | 825  | 18 | 0.00956021 |
| 0.0573076 | 1        | 825  | 18 | 0.00956021 |
| 0.0778346 | 1        | 670  | 19 | 0.00727388 |
| 0.0889412 | 1        | 756  | 16 | 0.00415777 |
| 0.0785882 | 1        | 668  | 19 | 0.00969263 |
| 0.0651473 | 1        | 586  | 11 | 0.00610865 |
| 0.0918831 | 1        | 789  | 21 | 0.00610865 |
| 0.0470007 | 1        | 789  | 21 | 0.00610865 |
| 0.0491765 | 0.837675 | 499  | 12 | 0.00798891 |
| 0.068     | 1        | 578  | 12 | 0.00662947 |
| 0.0705882 | 1        | 600  | 15 | 0.00674423 |
| 0.0759821 | 1        | 646  | 13 | 0.00518176 |
| 0.07554   | 1        | 710  | 20 | 0.00966614 |
| 0.0702353 | 1        | 597  | 17 | 0.009622   |
| 0.102239  | 1        | 936  | 25 | 0.00539362 |
| 0.0890588 | 1        | 757  | 15 | 0.00552603 |
| 0.0692941 | 1        | 589  | 17 | 0.00911001 |
| 0.103368  | 1        | 884  | 24 | 0.005835   |
| 0.125468  | 1        | 1073 | 28 | 0.00727388 |



|           |   |      |    |            |
|-----------|---|------|----|------------|
| 0.0856471 | 1 | 728  | 20 | 0.00948077 |
| 0.0712941 | 1 | 606  | 17 | 0.00986918 |
| 0.0382503 | 1 | 606  | 17 | 0.00847443 |
| 0.0381204 | 1 | 606  | 17 | 0.00847443 |
| 0.0802353 | 1 | 682  | 15 | 0.00507583 |
| 0.0998484 | 1 | 856  | 24 | 0.00900408 |
| 0.0649412 | 1 | 552  | 11 | 0.00922477 |
| 0.0473706 | 1 | 672  | 15 | 0.00677071 |
| 0.0463832 | 1 | 672  | 15 | 0.00677071 |
| 0.0536077 | 1 | 581  | 17 | 0.00793595 |
| 0.0688767 | 1 | 588  | 17 | 0.00784767 |
| 0.0689332 | 1 | 588  | 17 | 0.00784767 |
| 0.0809412 | 1 | 688  | 19 | 0.00564079 |
| 0.0667532 | 1 | 617  | 14 | 0.00803305 |
| 0.0742783 | 1 | 633  | 17 | 0.00927773 |
| 0.0506923 | 1 | 432  | 10 | 0.00703554 |
| 0.078     | 1 | 663  | 15 | 0.00579086 |
| 0.0696827 | 1 | 593  | 17 | 0.00706202 |
| 0.0553341 | 1 | 472  | 10 | 0.00572024 |
| 0.0522914 | 1 | 453  | 13 | 0.00922477 |
| 0.0686907 | 1 | 586  | 16 | 0.00994862 |
| 0.0694118 | 1 | 590  | 17 | 0.00779471 |
| 0.0391483 | 1 | 467  | 10 | 0.00848325 |
| 0.0707059 | 1 | 601  | 11 | 0.00666478 |
| 0.0657663 | 1 | 560  | 16 | 0.00756519 |
| 0.0802114 | 1 | 683  | 20 | 0.00331032 |
| 0.0589744 | 1 | 552  | 16 | 0.00918946 |
| 0.0650641 | 1 | 609  | 12 | 0.00898642 |
| 0.0637821 | 1 | 597  | 17 | 0.0087216  |
| 0.0456159 | 1 | 604  | 17 | 0.00865981 |
| 0.0454648 | 1 | 602  | 17 | 0.00650589 |
| 0.0806586 | 1 | 1068 | 20 | 0.00762698 |
| 0.0702353 | 1 | 597  | 17 | 0.00918063 |
| 0.0314221 | 1 | 525  | 15 | 0.00748574 |
| 0.0372277 | 1 | 622  | 17 | 0.00779471 |
| 0.0800861 | 1 | 707  | 20 | 0.00659416 |
| 0.0873239 | 1 | 992  | 26 | 0.0068943  |
| 0.116706  | 1 | 992  | 26 | 0.0068943  |
| 0.0850264 | 1 | 724  | 20 | 0.00966614 |
| 0.0749412 | 1 | 637  | 18 | 0.00539362 |
| 0.0703116 | 1 | 598  | 13 | 0.00246288 |
| 0.0887059 | 1 | 754  | 17 | 0.00643527 |
| 0.0692254 | 1 | 597  | 16 | 0.00978973 |
| 0.0805487 | 1 | 687  | 20 | 0.00605568 |
| 0.0759375 | 1 | 646  | 18 | 0.00617927 |
| 0.0683529 | 1 | 581  | 16 | 0.00984269 |
| 0.0849412 | 1 | 722  | 19 | 0.00759167 |

|            |           |      |    |            |
|------------|-----------|------|----|------------|
| 0.0703529  | 1         | 598  | 17 | 0.00669127 |
| 0.0477647  | 1         | 406  | 11 | 0.00995745 |
| 0.0756401  | 1         | 644  | 18 | 0.00783002 |
| 0.0679975  | 1         | 981  | 23 | 0.00645292 |
| 0.0789412  | 1         | 671  | 19 | 0.00647058 |
| 0.06659    | 1         | 579  | 16 | 0.00890698 |
| 0.0689534  | 1         | 587  | 17 | 0.00838615 |
| 0.0810747  | 1         | 691  | 18 | 0.00757402 |
| 0.110353   | 1         | 938  | 25 | 0.00632934 |
| 0.106468   | 1         | 907  | 22 | 0.00733567 |
| 0.0690732  | 1         | 597  | 17 | 0.00854505 |
| 0.0982279  | 1         | 837  | 23 | 0.0062852  |
| 0.0734603  | 1         | 625  | 17 | 0.00670009 |
| 0.0682298  | 1         | 582  | 10 | 0.00213626 |
| 0.127882   | 1         | 1087 | 24 | 0.00331915 |
| 0.0710231  | 1         | 613  | 17 | 0.00639996 |
| 0.0930779  | 1         | 792  | 23 | 0.00580851 |
| 0.0619738  | 0.870279  | 609  | 17 | 0.00918063 |
| 0.076      | 1         | 646  | 17 | 0.00668244 |
| 0.0781158  | 1         | 665  | 19 | 0.00508466 |
| 0.0702353  | 1         | 597  | 12 | 0.00820077 |
| 0.0622133  | 1         | 529  | 15 | 0.00951608 |
| 0.0825882  | 1         | 702  | 18 | 0.00558783 |
| 0.0409207  | 1         | 592  | 17 | 0.00960435 |
| 0.0419739  | 1         | 592  | 17 | 0.00960435 |
| 0.0662244  | 1         | 599  | 10 | 0.00515528 |
| 0.0844754  | 1         | 752  | 21 | 0.00620575 |
| 0.108235   | 1         | 920  | 25 | 0.00614396 |
| 0.0713703  | 1         | 612  | 17 | 0.00849208 |
| 0.0414052  | 1         | 607  | 16 | 0.00502286 |
| 0.00387642 | 0.0409938 | 805  | 22 | 0.00540245 |
| 0.094075   | 1         | 805  | 22 | 0.00540245 |
| 0.0695294  | 1         | 591  | 17 | 0.00978973 |
| 0.0827077  | 1         | 705  | 20 | 0.00511997 |
| 0.0701176  | 1         | 596  | 12 | 0.00695609 |
| 0.0712698  | 1         | 609  | 15 | 0.00991331 |
| 0.0596471  | 1         | 507  | 13 | 0.00533183 |
| 0.0883197  | 1         | 769  | 22 | 0.00875691 |
| 0.0701176  | 1         | 596  | 17 | 0.00686782 |
| 0.084      | 1         | 714  | 16 | 0.00660299 |
| 0.0762353  | 1         | 648  | 18 | 0.00865981 |
| 0.0571278  | 1         | 650  | 14 | 0.00647058 |
| 0.0559042  | 1         | 490  | 14 | 0.00982504 |
| 0.07       | 1         | 595  | 17 | 0.00918946 |
| 0.131529   | 1         | 1118 | 26 | 0.00956021 |
| 0.0476002  | 1         | 600  | 16 | 0.00822726 |
| 0.0472828  | 1         | 596  | 17 | 0.00603803 |

|           |          |      |    |            |
|-----------|----------|------|----|------------|
| 0.0756471 | 1        | 643  | 18 | 0.00645292 |
| 0.0773516 | 1        | 847  | 24 | 0.0056761  |
| 0.0701227 | 1        | 606  | 12 | 0.00916297 |
| 0.0878307 | 1        | 747  | 21 | 0.00493459 |
| 0.0748235 | 1        | 636  | 14 | 0.00602037 |
| 0.072     | 1        | 612  | 17 | 0.0062852  |
| 0.0741089 | 1        | 630  | 18 | 0.00839498 |
| 0.120927  | 1        | 1028 | 29 | 0.00601155 |
| 0.0932831 | 1        | 793  | 16 | 0.00515528 |
| 0.0691683 | 1        | 588  | 14 | 0.00698257 |
| 0.0708235 | 1        | 602  | 10 | 0.00936601 |
| 0.0734118 | 1        | 624  | 18 | 0.00902173 |
| 0.107108  | 1        | 996  | 28 | 0.00494342 |
| 0.0701176 | 1        | 596  | 17 | 0.00732685 |
| 0.0750588 | 1        | 638  | 18 | 0.00667361 |
| 0.0788235 | 1        | 670  | 14 | 0.00662947 |
| 0.0947418 | 1        | 809  | 23 | 0.00708851 |
| 0.082     | 1        | 697  | 20 | 0.00782119 |
| 0.0482446 | 1        | 415  | 12 | 0.00405183 |
| 0.0546756 | 0.849916 | 593  | 16 | 0.00857153 |
| 0.056719  | 1        | 520  | 14 | 0.00784767 |
| 0.101504  | 1        | 864  | 21 | 0.00228633 |
| 0.0744197 | 1        | 638  | 18 | 0.0067972  |
| 0.0519511 | 0.52619  | 840  | 23 | 0.00517293 |
| 0.0601015 | 1        | 592  | 17 | 0.00708851 |
| 0.0519872 | 1        | 603  | 17 | 0.0089776  |
| 0.0519267 | 1        | 442  | 12 | 0.00916297 |
| 0.0693873 | 1        | 590  | 10 | 0.00608217 |
| 0.0702023 | 1        | 597  | 17 | 0.00337212 |
| 0.0762353 | 1        | 648  | 18 | 0.00823608 |
| 0.0851765 | 1        | 724  | 20 | 0.00584382 |
| 0.0295813 | 1        | 580  | 17 | 0.00965731 |
| 0.0481659 | 1        | 411  | 12 | 0.00989566 |
| 0.0767059 | 1        | 652  | 19 | 0.00843029 |
| 0.0169632 | 1        | 574  | 17 | 0.00338094 |
| 0.0253266 | 1        | 857  | 24 | 0.00700023 |
| 0.0259176 | 1        | 877  | 25 | 0.00623224 |
| 0.0166085 | 1        | 562  | 16 | 0.00739747 |
| 0.0395118 | 1        | 1337 | 38 | 0.00533183 |
| 0.0166085 | 1        | 562  | 16 | 0.00918063 |
| 0.0166085 | 1        | 562  | 16 | 0.00878339 |
| 0.0179384 | 1        | 607  | 17 | 0.00767995 |
| 0.0166085 | 1        | 562  | 16 | 0.00764464 |
| 0.0244104 | 1        | 826  | 19 | 0.00752988 |
| 0.0187659 | 1        | 635  | 18 | 0.00519941 |
| 0.0741481 | 1        | 631  | 17 | 0.00529652 |
| 0.0280731 | 0.728956 | 594  | 16 | 0.00960435 |

|           |   |      |    |            |
|-----------|---|------|----|------------|
| 0.0523671 | 1 | 594  | 16 | 0.00960435 |
| 0.0412344 | 1 | 636  | 18 | 0.00555251 |
| 0.0560698 | 1 | 636  | 18 | 0.00555251 |
| 0.0709569 | 1 | 763  | 21 | 0.00621458 |
| 0.0595183 | 1 | 640  | 18 | 0.00648823 |
| 0.0696259 | 1 | 629  | 17 | 0.0041048  |
| 0.0703529 | 1 | 598  | 16 | 0.00651472 |
| 0.0974118 | 1 | 828  | 20 | 0.00984269 |
| 0.0703529 | 1 | 598  | 15 | 0.00876573 |
| 0.0687398 | 1 | 630  | 18 | 0.00706202 |
| 0.075694  | 1 | 649  | 19 | 0.00574672 |
| 0.0812941 | 1 | 691  | 20 | 0.00611748 |
| 0.0698824 | 1 | 594  | 17 | 0.00806836 |
| 0.088575  | 1 | 997  | 28 | 0.005323   |
| 0.127727  | 1 | 1095 | 30 | 0.00632051 |
| 0.0676306 | 1 | 580  | 14 | 0.0091718  |
| 0.107109  | 1 | 913  | 25 | 0.00702671 |
| 0.100774  | 1 | 859  | 24 | 0.00321322 |
| 0.0717647 | 1 | 610  | 17 | 0.00988683 |
| 0.0947059 | 1 | 805  | 22 | 0.00214509 |
| 0.0729412 | 1 | 620  | 18 | 0.00886284 |
| 0.183882  | 1 | 1563 | 39 | 0.00240991 |
| 0.109882  | 1 | 934  | 17 | 0.0027895  |
| 0.142824  | 1 | 1214 | 33 | 0.00601155 |
| 0.111412  | 1 | 947  | 21 | 0.00481983 |
| 0.109626  | 1 | 935  | 21 | 0.00645292 |
| 0.0743529 | 1 | 632  | 16 | 0.00647058 |
| 0.0725882 | 1 | 617  | 11 | 0.00810367 |
| 0.0976825 | 1 | 843  | 24 | 0.00798008 |
| 0.0796102 | 1 | 727  | 19 | 0.00563196 |
| 0.0846391 | 1 | 740  | 17 | 0.00493459 |
| 0.072445  | 1 | 616  | 13 | 0.00992214 |
| 0.0552952 | 1 | 590  | 16 | 0.00847443 |
| 0.0923529 | 1 | 785  | 22 | 0.00738864 |
| 0.0697347 | 1 | 594  | 16 | 0.00789181 |
| 0.0808875 | 1 | 689  | 13 | 0.00761816 |
| 0.0361357 | 1 | 588  | 17 | 0.00865981 |
| 0.068917  | 1 | 588  | 17 | 0.00865981 |
| 0.0513455 | 1 | 622  | 17 | 0.00884518 |
| 0.0703529 | 1 | 598  | 17 | 0.00927773 |
| 0.110226  | 1 | 941  | 26 | 0.00729154 |
| 0.112211  | 1 | 1666 | 45 | 0.00601155 |
| 0.0480905 | 1 | 714  | 19 | 0.00758285 |
| 0.101473  | 1 | 868  | 22 | 0.00424604 |
| 0.108461  | 1 | 1046 | 29 | 0.00428135 |
| 0.078697  | 1 | 761  | 19 | 0.00534065 |
| 0.074822  | 1 | 641  | 19 | 0.00756519 |

|           |          |      |    |            |
|-----------|----------|------|----|------------|
| 0.0365327 | 1        | 609  | 15 | 0.00727388 |
| 0.07      | 1        | 595  | 12 | 0.00822726 |
| 0.0765168 | 1        | 652  | 18 | 0.00616161 |
| 0.0845882 | 1        | 719  | 20 | 0.00863332 |
| 0.0477201 | 1        | 742  | 21 | 0.0062852  |
| 0.0961538 | 1        | 820  | 23 | 0.00356632 |
| 0.0856509 | 1        | 733  | 19 | 0.00530534 |
| 0.0689139 | 1        | 599  | 17 | 0.00297488 |
| 0.0799159 | 1        | 684  | 17 | 0.00835084 |
| 0.0753143 | 1        | 695  | 20 | 0.00430783 |
| 0.0431222 | 1        | 674  | 19 | 0.0095867  |
| 0.0389635 | 1        | 609  | 17 | 0.00323087 |
| 0.0281169 | 1        | 456  | 13 | 0.00922477 |
| 0.0377358 | 1        | 612  | 17 | 0.00866863 |
| 0.0793721 | 1        | 713  | 15 | 0.0042637  |
| 0.0510973 | 1        | 610  | 18 | 0.00816546 |
| 0.0701426 | 1        | 600  | 17 | 0.0095867  |
| 0.076317  | 1        | 649  | 19 | 0.00643527 |
| 0.0521952 | 1        | 447  | 13 | 0.00728271 |
| 0.0865474 | 1        | 745  | 13 | 0.00649706 |
| 0.0876471 | 1        | 745  | 13 | 0.00649706 |
| 0.0813342 | 1        | 712  | 18 | 0.00270122 |
| 0.0835684 | 1        | 711  | 20 | 0.00542893 |
| 0.113529  | 1        | 965  | 23 | 0.00444025 |
| 0.0902515 | 1        | 786  | 22 | 0.00531417 |
| 0.116087  | 1        | 1011 | 29 | 0.00758285 |
| 0.0619259 | 1        | 600  | 17 | 0.00970145 |
| 0.0759018 | 1        | 646  | 19 | 0.00508466 |
| 0.0694118 | 1        | 590  | 17 | 0.00556134 |
| 0.0691271 | 1        | 590  | 17 | 0.00556134 |
| 0.116941  | 1        | 994  | 27 | 0.00413128 |
| 0.0605842 | 1        | 587  | 15 | 0.00860684 |
| 0.0685297 | 1        | 591  | 17 | 0.0061263  |
| 0.121962  | 1        | 1099 | 27 | 0.00760933 |
| 0.0530269 | 1        | 833  | 21 | 0.00345156 |
| 0.0955182 | 1        | 812  | 23 | 0.00755636 |
| 0.0961764 | 1        | 820  | 23 | 0.00406066 |
| 0.0964706 | 1        | 820  | 23 | 0.00406066 |
| 0.0380201 | 1        | 487  | 14 | 0.00412246 |
| 0.0495745 | 1        | 635  | 15 | 0.00972794 |
| 0.0718824 | 1        | 611  | 17 | 0.00991331 |
| 0.0754118 | 1        | 641  | 17 | 0.00859801 |
| 0.0781176 | 1        | 664  | 19 | 0.00823608 |
| 0.0499581 | 1        | 716  | 21 | 0.00708851 |
| 0.0380829 | 0.902235 | 716  | 21 | 0.00708851 |
| 0.0681176 | 0.994845 | 582  | 17 | 0.00560548 |
| 0.10738   | 1        | 921  | 26 | 0.00657651 |

|           |          |      |    |            |
|-----------|----------|------|----|------------|
| 0.0647059 | 1        | 550  | 15 | 0.00647058 |
| 0.0877666 | 0.933915 | 802  | 20 | 0.0075034  |
| 0.0943529 | 1        | 802  | 20 | 0.0075034  |
| 0.0753051 | 1        | 648  | 19 | 0.0035928  |
| 0.0398694 | 1        | 342  | 10 | 0.00610865 |
| 0.0698818 | 1        | 597  | 16 | 0.00591444 |
| 0.0767803 | 1        | 662  | 19 | 0.00950725 |
| 0.0694184 | 1        | 592  | 17 | 0.00843912 |
| 0.0689183 | 1        | 604  | 17 | 0.00575555 |
| 0.0669092 | 1        | 607  | 16 | 0.00965731 |
| 0.0692606 | 1        | 607  | 16 | 0.00965731 |
| 0.0687059 | 1        | 584  | 18 | 0.00854505 |
| 0.074     | 1        | 629  | 25 | 0.00742395 |
| 0.0521745 | 1        | 757  | 21 | 0.00590562 |
| 0.0723005 | 1        | 616  | 18 | 0.00772409 |
| 0.0701878 | 1        | 598  | 16 | 0.00591444 |
| 0.0699777 | 1        | 596  | 11 | 0.00850091 |
| 0.136706  | 1        | 1162 | 29 | 0.00552603 |

Fraction of negatively enriched windows in region

MAT-score on T(WTC vs. WTHF)

|       |          |
|-------|----------|
| 1     | -3.76335 |
| 0     | 4.12209  |
| 1     | -3.80165 |
| 1     | -3.78589 |
| 0     | 4.50485  |
| 1     | -4.01384 |
| 0     | 4.18865  |
| 0     | 4.39667  |
| 1     | -3.85374 |
| 0     | 4.47381  |
| 1     | -3.973   |
| 0     | 4.05252  |
| 1     | -4.02762 |
| 0     | 4.00307  |
| 1     | -4.05001 |
| 1     | -4.06366 |
| 1     | -4.01679 |
| 0.625 | -4.12067 |
| 1     | -4.01398 |
| 1     | -4.01398 |
| 1     | -4.12252 |
| 1     | -4.16581 |
| 1     | -4.00441 |
| 1     | -3.74442 |
| 1     | -4.06545 |
| 0     | 4.11361  |
| 0     | 4.39043  |
| 1     | -3.71864 |
| 0     | 4.00406  |
| 0     | 4.19419  |
| 0     | 4.19419  |
| 1     | -4.13651 |
| 0     | 4.3001   |
| 0     | 3.86011  |
| 0     | 3.9028   |
| 0     | 4.46996  |
| 1     | -4.05506 |
| 0     | 4.06848  |
| 0     | 4.05734  |
| 0     | 4.02543  |
| 0     | 4.02543  |
| 0     | 4.08128  |
| 0     | 4.08128  |
| 0     | 4.47499  |

|   |          |
|---|----------|
| 0 | 4.03773  |
| 0 | 3.94046  |
| 1 | -3.82196 |
| 0 | 4.06557  |
| 0 | 4.38114  |
| 0 | 4.27635  |
| 0 | 4.1671   |
| 0 | 4.0189   |
| 0 | 4.0189   |
| 0 | 4.01336  |
| 0 | 4.03473  |
| 0 | 4.23452  |
| 0 | 3.94488  |
| 0 | 4.46528  |
| 0 | 4.19734  |
| 0 | 4.53793  |
| 0 | 4.21005  |
| 0 | 3.87075  |
| 0 | 4.23549  |
| 0 | 4.06357  |
| 1 | -4.04221 |
| 0 | 4.8154   |
| 0 | 3.93612  |
| 0 | 4.29651  |
| 0 | 3.9022   |
| 0 | 4.05003  |
| 0 | 4.20095  |
| 0 | 4.14807  |
| 0 | 4.36412  |
| 0 | 4.36412  |
| 0 | 4.0987   |
| 0 | 4.13515  |
| 1 | -3.73038 |
| 1 | -3.73038 |
| 0 | 4.22475  |
| 0 | 3.92316  |
| 0 | 3.82116  |
| 0 | 4.30357  |
| 0 | 4.15066  |
| 0 | 4.15066  |
| 1 | -3.73887 |
| 0 | 4.05164  |
| 0 | 4.06839  |
| 0 | 4.02687  |
| 0 | 4.07596  |
| 1 | -3.74847 |
| 0 | 4.26175  |



|   |          |
|---|----------|
| 0 | 4.09857  |
| 0 | 4.21891  |
| 1 | -4.0514  |
| 0 | 4.14593  |
| 0 | 4.08178  |
| 0 | 4.06355  |
| 0 | 3.85392  |
| 0 | 3.85392  |
| 0 | 4.06964  |
| 0 | 4.1875   |
| 0 | 4.0257   |
| 0 | 3.84989  |
| 0 | 3.96049  |
| 0 | 4.05754  |
| 0 | 4.05754  |
| 1 | -3.86379 |
| 0 | 4.10433  |
| 0 | 4.39321  |
| 0 | 4.02735  |
| 0 | 3.9503   |
| 0 | 3.84057  |
| 0 | 3.93113  |
| 0 | 4.14479  |
| 0 | 4.2375   |
| 1 | -4.02531 |
| 1 | -3.81371 |
| 0 | 3.98929  |
| 0 | 3.87513  |
| 0 | 3.83291  |
| 0 | 4.02935  |
| 0 | 4.01491  |
| 0 | 4.07049  |
| 1 | -4.00677 |
| 0 | 4.07241  |
| 1 | -4.05768 |
| 0 | 4.56136  |
| 0 | 4.30456  |
| 0 | 3.86823  |
| 1 | -3.92183 |
| 1 | -3.77324 |
| 1 | -4.16242 |
| 0 | 4.04133  |
| 0 | 4.01466  |
| 0 | 4.38188  |
| 0 | 4.103    |
| 1 | -4.09606 |
| 0 | 4.11104  |

|   |          |
|---|----------|
| 0 | 4.11104  |
| 1 | -3.86716 |
| 0 | 4.23564  |
| 1 | -3.89883 |
| 1 | -3.73404 |
| 0 | 4.29336  |
| 0 | 4.10721  |
| 0 | 4.11742  |
| 0 | 3.85404  |
| 0 | 4.21367  |
| 0 | 3.93898  |
| 0 | 3.93898  |
| 0 | 3.90154  |
| 0 | 3.90154  |
| 1 | -4.04146 |
| 1 | -4.1262  |
| 0 | 4.37813  |
| 0 | 4.02649  |
| 0 | 4.20833  |
| 1 | -3.94087 |
| 1 | -4.16423 |
| 1 | -3.73973 |
| 1 | -3.73973 |
| 1 | -3.74442 |
| 1 | -3.74442 |
| 0 | 4.51771  |
| 0 | 4.16295  |
| 0 | 4.63312  |
| 1 | -4.02009 |
| 0 | 4.43198  |
| 0 | 4.12241  |
| 0 | 3.89429  |
| 0 | 4.4322   |
| 0 | 3.99713  |
| 0 | 4.50189  |
| 0 | 3.93541  |
| 0 | 4.32482  |
| 0 | 4.31462  |
| 0 | 4.04908  |
| 0 | 4.33576  |
| 1 | -3.74035 |
| 1 | -3.98466 |
| 0 | 3.86605  |
| 0 | 3.85938  |
| 1 | -3.79755 |
| 1 | -4.06327 |
| 0 | 4.10102  |

|   |          |
|---|----------|
| 0 | 4.07809  |
| 0 | 3.9015   |
| 0 | 3.90182  |
| 1 | -4.05884 |
| 0 | 4.10662  |
| 0 | 4.08838  |
| 0 | 4.26302  |
| 0 | 4.22066  |
| 0 | 4.06518  |
| 0 | 4.12251  |
| 0 | 4.00424  |
| 0 | 3.99716  |
| 1 | -3.8361  |
| 0 | 4.02003  |
| 0 | 4.33502  |
| 0 | 4.41632  |
| 0 | 4.00687  |
| 0 | 4.14365  |
| 1 | -4.01354 |
| 0 | 3.90013  |
| 1 | -3.87874 |
| 0 | 4.01418  |
| 1 | -4.00573 |
| 0 | 3.8758   |
| 0 | 4.03751  |
| 0 | 3.92642  |
| 0 | 4.15742  |
| 0 | 3.9608   |
| 1 | -3.79504 |
| 1 | -3.82266 |
| 0 | 4.08832  |
| 1 | -3.7314  |
| 1 | -3.7314  |
| 1 | -4.00562 |
| 0 | 3.87624  |
| 0 | 3.88395  |
| 0 | 4.19407  |
| 0 | 4.03349  |
| 0 | 3.87213  |
| 0 | 4.00154  |
| 0 | 4.11517  |
| 0 | 3.91489  |
| 0 | 4.30454  |
| 0 | 4.20564  |
| 0 | 4.11009  |
| 0 | 4.04087  |
| 0 | 4.05755  |

|   |          |
|---|----------|
| 0 | 4.25469  |
| 0 | 4.14541  |
| 0 | 3.92217  |
| 0 | 4.15008  |
| 0 | 3.83519  |
| 0 | 3.85386  |
| 0 | 4.07331  |
| 0 | 4.00968  |
| 0 | 4.23849  |
| 0 | 4.38428  |
| 0 | 3.88925  |
| 0 | 4.07219  |
| 0 | 4.09167  |
| 0 | 3.86264  |
| 0 | 4.0371   |
| 1 | -4.0967  |
| 1 | -3.98579 |
| 1 | -4.17611 |
| 0 | 4.09285  |
| 0 | 3.95376  |
| 0 | 3.95376  |
| 0 | 3.8487   |
| 0 | 4.29452  |
| 0 | 4.15913  |
| 0 | 4.37279  |
| 0 | 4.08591  |
| 0 | 3.84962  |
| 0 | 4.05144  |
| 0 | 4.00803  |
| 0 | 4.36201  |
| 0 | 4.18787  |
| 0 | 4.18787  |
| 0 | 4.06949  |
| 0 | 4.1304   |
| 1 | -4.03189 |
| 0 | 4.85437  |
| 0 | 4.19069  |
| 1 | -3.75881 |
| 0 | 4.02095  |
| 1 | -3.78321 |
| 0 | 3.85666  |
| 1 | -4.015   |
| 0 | 4.13217  |
| 0 | 4.01215  |
| 0 | 4.2453   |
| 0 | 3.92755  |
| 1 | -3.92596 |

|   |          |
|---|----------|
| 0 | 4.1315   |
| 0 | 4.12702  |
| 0 | 3.89247  |
| 0 | 4.00668  |
| 0 | 3.91376  |
| 0 | 4.01086  |
| 0 | 4.01086  |
| 1 | -4.05804 |
| 0 | 4.26722  |
| 0 | 4.13543  |
| 0 | 4.58884  |
| 0 | 4.03121  |
| 0 | 4.07945  |
| 1 | -3.85549 |
| 0 | 4.43388  |
| 0 | 4.23716  |
| 0 | 3.87938  |
| 0 | 3.93236  |
| 0 | 4.33923  |
| 0 | 4.02324  |
| 0 | 4.15148  |
| 0 | 4.71617  |
| 0 | 4.08002  |
| 0 | 4.32723  |
| 0 | 4.26972  |
| 0 | 4.26972  |
| 1 | -4.08357 |
| 1 | -4.03257 |
| 0 | 4.12753  |
| 1 | -3.84142 |
| 0 | 4.02671  |
| 1 | -4.08582 |
| 1 | -3.77029 |
| 1 | -3.80666 |
| 0 | 4.05553  |
| 0 | 4.04484  |
| 0 | 4.14077  |
| 0 | 4.51406  |
| 1 | -4.06574 |
| 1 | -3.85236 |
| 1 | -4.10792 |
| 0 | 3.88894  |
| 1 | -3.80121 |
| 0 | 4.32118  |
| 1 | -4.06894 |
| 0 | 4.25121  |
| 0 | 3.82188  |

|   |          |
|---|----------|
| 1 | -3.86825 |
| 0 | 4.2268   |
| 0 | 4.25794  |
| 0 | 3.89757  |
| 0 | 4.40544  |
| 0 | 4.14452  |
| 0 | 3.9573   |
| 0 | 4.31067  |
| 1 | -3.7892  |
| 0 | 4.07138  |
| 0 | 3.82379  |
| 0 | 4.13676  |
| 0 | 4.04042  |
| 0 | 4.04042  |
| 1 | -4.07622 |
| 1 | -4.11837 |
| 1 | -3.82154 |
| 0 | 3.88654  |
| 0 | 4.07798  |
| 0 | 4.04683  |
| 0 | 4.07526  |
| 0 | 4.06041  |
| 0 | 4.25954  |
| 1 | -3.92632 |
| 0 | 4.16134  |
| 1 | -4.08162 |
| 0 | 3.86786  |
| 0 | 3.95911  |
| 0 | 4.85405  |
| 1 | -3.84555 |
| 1 | -3.72568 |
| 1 | -4.00763 |
| 1 | -4.00763 |
| 1 | -3.94686 |
| 0 | 4.28815  |
| 0 | 3.90873  |
| 0 | 4.02382  |
| 1 | -3.93991 |
| 0 | 4.24512  |
| 0 | 3.9267   |
| 0 | 3.84442  |
| 0 | 4.1292   |
| 1 | -4.13074 |
| 0 | 3.82857  |
| 0 | 4.18305  |
| 1 | -3.76109 |
| 0 | 3.87992  |

|   |          |
|---|----------|
| 1 | -3.91875 |
| 1 | -4.06973 |
| 0 | 4.48564  |
| 0 | 3.99169  |
| 0 | 3.84891  |
| 0 | 4.12582  |
| 0 | 4.01334  |
| 0 | 4.27406  |
| 1 | -3.85076 |
| 0 | 4.00704  |
| 0 | 4.13676  |
| 0 | 3.91679  |
| 0 | 4.00706  |
| 0 | 4.62224  |
| 0 | 3.89103  |
| 0 | 4.2523   |
| 0 | 3.86791  |
| 0 | 4.06389  |
| 0 | 3.88541  |
| 1 | -3.80773 |
| 1 | -3.77041 |
| 0 | 3.89851  |
| 0 | 3.98138  |
| 0 | 4.30189  |
| 0 | 4.04165  |
| 0 | 3.99161  |
| 0 | 4.32746  |
| 0 | 3.88085  |
| 0 | 3.85611  |
| 1 | -4.13875 |
| 0 | 3.88056  |
| 0 | 4.10918  |
| 0 | 4.00618  |
| 1 | -3.95483 |
| 0 | 3.91131  |
| 0 | 4.49507  |
| 0 | 4.55936  |
| 1 | -4.00328 |
| 1 | -4.12471 |
| 0 | 3.82689  |
| 0 | 4.12757  |
| 0 | 4.25738  |
| 0 | 4.09659  |
| 1 | -4.0586  |
| 1 | -3.92412 |
| 0 | 4.03984  |
| 0 | 4.05168  |

|   |          |
|---|----------|
| 0 | 3.85101  |
| 0 | 4.11593  |
| 0 | 4.02899  |
| 1 | -3.76132 |
| 0 | 4.34002  |
| 1 | -4.12745 |
| 0 | 4.18164  |
| 0 | 4.18164  |
| 0 | 4.15738  |
| 0 | 4.15738  |
| 0 | 3.88248  |
| 0 | 3.91715  |
| 1 | -4.08118 |
| 1 | -3.72436 |
| 1 | -3.81172 |
| 0 | 4.23836  |
| 0 | 3.98123  |
| 0 | 4.15076  |
| 0 | 4.07986  |
| 0 | 4.1254   |
| 0 | 4.1254   |
| 0 | 4.09264  |
| 0 | 3.94763  |
| 0 | 3.86599  |
| 0 | 4.35609  |
| 0 | 4.35609  |
| 0 | 4.1929   |
| 0 | 4.1929   |
| 0 | 4.01596  |
| 0 | 4.01458  |
| 1 | -4.13877 |
| 1 | -3.8079  |
| 1 | -3.8079  |
| 0 | 3.84665  |
| 0 | 3.84665  |
| 0 | 4.30939  |
| 0 | 4.08319  |
| 1 | -4.07801 |
| 0 | 3.85933  |
| 0 | 4.02645  |
| 0 | 3.84047  |
| 0 | 4.24613  |
| 0 | 4.32952  |
| 0 | 3.97509  |
| 0 | 4.31552  |
| 0 | 4.0451   |
| 1 | -4.00729 |



|   |          |
|---|----------|
| 1 | -3.87868 |
| 1 | -3.87362 |
| 0 | 3.8228   |
| 1 | -3.96277 |
| 1 | -3.72671 |
| 1 | -3.72238 |
| 1 | -4.09635 |
| 0 | 4.03016  |
| 0 | 4.03409  |
| 1 | -4.02117 |
| 0 | 3.99708  |
| 1 | -4.07303 |
| 1 | -3.85268 |
| 0 | 4.10391  |
| 0 | 4.03039  |
| 0 | 3.84686  |
| 0 | 4.13797  |
| 0 | 4.00867  |
| 1 | -3.75071 |
| 1 | -4.10457 |
| 0 | 3.94037  |
| 1 | -4.17419 |
| 0 | 4.04469  |
| 0 | 4.06592  |
| 0 | 4.18202  |
| 1 | -3.78242 |
| 0 | 4.21281  |
| 1 | -4.00341 |
| 0 | 4.02893  |
| 0 | 3.87035  |
| 1 | -4.01925 |
| 1 | -4.00319 |
| 1 | -4.03933 |
| 1 | -3.80056 |
| 1 | -3.80056 |
| 1 | -3.78742 |
| 0 | 4.12639  |
| 1 | -3.81359 |
| 1 | -3.76725 |
| 0 | 4.51784  |
| 0 | 4.12469  |
| 0 | 4.08772  |
| 0 | 4.02094  |
| 1 | -4.05119 |
| 1 | -3.74974 |
| 1 | -3.93817 |
| 0 | 3.82513  |

|   |          |
|---|----------|
| 1 | -3.74442 |
| 0 | 4.27807  |
| 0 | 4.78024  |
| 0 | 4.07837  |
| 0 | 4.22643  |
| 1 | -3.89816 |
| 1 | -4.10209 |
| 1 | -3.7483  |
| 1 | -3.74464 |
| 0 | 4.24822  |
| 0 | 4.24822  |
| 0 | 4.09466  |
| 0 | 3.89567  |
| 0 | 3.89567  |
| 1 | -3.7463  |
| 1 | -3.87831 |
| 1 | -3.7771  |
| 1 | -4.15749 |
| 0 | 3.89739  |
| 1 | -3.99973 |
| 0 | 4.07931  |
| 0 | 3.88577  |
| 0 | 3.88577  |
| 1 | -3.80142 |
| 0 | 4.16738  |
| 0 | 4.12337  |
| 1 | -3.75035 |
| 0 | 3.87376  |
| 1 | -3.98515 |
| 1 | -3.80196 |
| 0 | 4.62717  |
| 0 | 4.62717  |
| 1 | -3.85806 |
| 0 | 4.10078  |
| 0 | 4.14651  |
| 0 | 4.38581  |
| 0 | 4.67761  |
| 0 | 3.85049  |
| 1 | -3.84303 |
| 0 | 4.16369  |
| 1 | -3.75471 |
| 0 | 4.37744  |
| 0 | 4.06985  |
| 1 | -4.04018 |
| 1 | -3.83846 |
| 0 | 3.86663  |
| 0 | 4.19208  |

|   |          |
|---|----------|
| 1 | -3.74158 |
| 1 | -3.74158 |
| 0 | 4.03341  |
| 0 | 4.05005  |
| 0 | 3.93209  |
| 0 | 3.99726  |
| 0 | 3.92084  |
| 1 | -4.1561  |
| 1 | -4.1087  |
| 1 | -3.72132 |
| 1 | -3.72973 |
| 0 | 4.1859   |
| 1 | -4.06427 |
| 1 | -3.73202 |
| 0 | 4.16779  |
| 1 | -4.05351 |
| 0 | 4.14808  |
| 0 | 3.91007  |
| 0 | 4.11637  |
| 1 | -4.11616 |
| 0 | 4.0218   |
| 0 | 4.53687  |
| 0 | 4.04974  |
| 0 | 4.27597  |
| 0 | 4.11546  |
| 0 | 3.828    |
| 0 | 4.09873  |
| 0 | 4.05766  |
| 0 | 4.0231   |
| 0 | 4.41826  |
| 1 | -3.77085 |
| 0 | 3.89667  |
| 1 | -3.84295 |
| 1 | -3.84295 |
| 1 | -3.77962 |
| 0 | 3.91138  |
| 1 | -3.72716 |
| 0 | 3.8253   |
| 0 | 4.00507  |
| 1 | -3.77016 |
| 0 | 3.84364  |
| 1 | -3.79785 |
| 0 | 4.22765  |
| 0 | 3.86087  |
| 0 | 4.51315  |
| 0 | 3.86924  |
| 0 | 3.82937  |

|   |          |
|---|----------|
| 0 | 3.86579  |
| 0 | 4.36204  |
| 1 | -4.1126  |
| 1 | -4.0511  |
| 0 | 4.39962  |
| 0 | 4.2132   |
| 0 | 4.15843  |
| 0 | 4.39736  |
| 0 | 3.99212  |
| 0 | 4.24883  |
| 0 | 3.85336  |
| 0 | 3.87516  |
| 0 | 4.27497  |
| 0 | 4.31134  |
| 1 | -3.81017 |
| 0 | 4.15972  |
| 1 | -4.08871 |
| 0 | 4.11878  |
| 0 | 4.07878  |
| 1 | -3.80563 |
| 0 | 3.91462  |
| 1 | -3.80143 |
| 1 | -4.17895 |
| 0 | 3.87128  |
| 0 | 3.86149  |
| 0 | 3.95851  |
| 0 | 3.96483  |
| 0 | 4.02459  |
| 1 | -4.09039 |
| 0 | 4.06407  |
| 1 | -4.06404 |
| 0 | 3.99144  |
| 1 | -4.02675 |
| 0 | 4.02591  |
| 0 | 4.14075  |
| 1 | -3.91697 |
| 0 | 4.28597  |
| 1 | -4.05771 |
| 0 | 4.20256  |
| 1 | -4.08775 |
| 0 | 4.0257   |
| 0 | 4.04507  |
| 1 | -4.13542 |
| 0 | 4.42576  |
| 0 | 3.84849  |
| 0 | 4.00046  |
| 0 | 3.84565  |

|   |          |
|---|----------|
| 0 | 3.85631  |
| 0 | 4.20352  |
| 0 | 3.87769  |
| 0 | 3.87769  |
| 1 | -3.89445 |
| 0 | 4.15652  |
| 1 | -4.01567 |
| 1 | -4.00733 |
| 1 | -3.79208 |
| 1 | -3.84952 |
| 0 | 4.41974  |
| 0 | 3.9713   |
| 0 | 4.11596  |
| 0 | 4.34711  |
| 0 | 4.05379  |
| 0 | 3.89828  |
| 1 | -3.766   |
| 0 | 4.43068  |
| 1 | -4.07395 |
| 1 | -3.83117 |
| 0 | 4.39657  |
| 1 | -3.96236 |
| 0 | 3.91725  |
| 0 | 4.04504  |
| 0 | 4.23942  |
| 0 | 4.81339  |
| 1 | -3.72299 |
| 0 | 4.20838  |
| 0 | 4.20838  |
| 0 | 4.3779   |
| 0 | 4.16289  |
| 0 | 4.14146  |
| 1 | -3.97179 |
| 0 | 4.44197  |
| 1 | -4.08605 |
| 1 | -3.76805 |
| 0 | 4.1358   |
| 0 | 4.1358   |
| 0 | 4.45151  |
| 0 | 4.45151  |
| 1 | -4.16338 |
| 0 | 4.07021  |
| 0 | 4.10233  |
| 1 | -3.86608 |
| 0 | 3.93659  |
| 0 | 4.28701  |
| 0 | 4.28701  |

|   |          |
|---|----------|
| 0 | 4.10116  |
| 1 | -3.80334 |
| 0 | 4.02253  |
| 0 | 4.56029  |
| 0 | 4.01806  |
| 0 | 4.16856  |
| 0 | 3.90045  |
| 0 | 4.51181  |
| 0 | 4.18196  |
| 1 | -4.06214 |
| 0 | 4.06346  |
| 1 | -3.96617 |
| 0 | 4.35762  |
| 0 | 4.77956  |
| 0 | 4.25859  |
| 0 | 4.10031  |
| 0 | 4.07725  |
| 0 | 4.41278  |
| 1 | -3.88576 |
| 0 | 4.06747  |
| 1 | -4.08855 |
| 1 | -4.08855 |
| 0 | 4.2168   |
| 1 | -3.8933  |
| 1 | -3.99261 |
| 0 | 4.03229  |
| 1 | -4.07545 |
| 1 | -3.72735 |
| 0 | 4.11854  |
| 0 | 3.95699  |
| 0 | 4.32326  |
| 0 | 4.34576  |
| 1 | -3.87319 |
| 0 | 3.90147  |
| 0 | 4.10765  |
| 0 | 3.94958  |
| 0 | 3.94958  |
| 0 | 4.06735  |
| 0 | 3.82154  |
| 0 | 4.07689  |
| 0 | 4.33718  |
| 0 | 4.33372  |
| 0 | 4.51396  |
| 0 | 4.18672  |
| 1 | -4.01898 |
| 0 | 4.1263   |
| 1 | -3.92125 |

|   |          |
|---|----------|
| 1 | -3.85804 |
| 0 | 4.1335   |
| 0 | 3.83905  |
| 0 | 3.84291  |
| 0 | 3.92653  |
| 0 | 3.92653  |
| 0 | 3.9403   |
| 1 | -3.7895  |
| 1 | -3.90749 |
| 1 | -4.11514 |
| 0 | 4.23262  |
| 0 | 4.1111   |
| 0 | 4.95976  |
| 1 | -3.95352 |
| 1 | -4.09527 |
| 1 | -3.80044 |
| 0 | 4.33206  |
| 0 | 4.27715  |
| 1 | -3.93164 |
| 1 | -4.05254 |
| 0 | 4.09721  |
| 0 | 4.09721  |
| 1 | -3.90666 |
| 1 | -4.08215 |
| 1 | -4.02111 |
| 0 | 4.14182  |
| 0 | 3.96965  |
| 0 | 4.61321  |
| 1 | -3.7409  |
| 1 | -3.86483 |
| 1 | -3.97865 |
| 0 | 4.13797  |
| 1 | -3.9417  |
| 1 | -3.80196 |
| 0 | 3.87352  |
| 1 | -3.7276  |
| 1 | -4.11154 |
| 1 | -3.9391  |
| 0 | 4.32727  |
| 1 | -3.73924 |
| 0 | 4.08245  |
| 1 | -4.01301 |
| 1 | -3.73175 |
| 1 | -4.15994 |
| 1 | -3.85148 |
| 1 | -3.98085 |
| 0 | 4.53065  |

|   |          |
|---|----------|
| 0 | 4.00406  |
| 0 | 3.94015  |
| 0 | 4.40423  |
| 0 | 4.05953  |
| 0 | 4.13045  |
| 1 | -4.02597 |
| 0 | 4.5272   |
| 1 | -3.77591 |
| 1 | -4.12314 |
| 1 | -4.01124 |
| 1 | -3.97869 |
| 0 | 3.97658  |
| 1 | -3.92422 |
| 0 | 3.82742  |
| 1 | -4.02522 |
| 1 | -4.05188 |
| 0 | 4.08747  |
| 1 | -4.02177 |
| 0 | 4.14189  |
| 1 | -4.03411 |
| 1 | -3.7313  |
| 1 | -3.86532 |
| 1 | -4.11408 |
| 1 | -3.78648 |
| 1 | -3.95028 |
| 1 | -3.73499 |
| 1 | -4.01659 |
| 1 | -3.91742 |
| 0 | 4.05877  |
| 0 | 4.48723  |
| 1 | -3.71716 |
| 0 | 4.23341  |
| 0 | 3.89197  |
| 1 | -3.87399 |
| 1 | -3.77573 |
| 1 | -3.95542 |
| 1 | -3.78393 |
| 0 | 4.06918  |
| 0 | 4.06918  |
| 1 | -3.73148 |
| 1 | -4.01561 |
| 1 | -3.80628 |
| 0 | 4.14189  |
| 0 | 4.14189  |
| 0 | 4.01543  |
| 0 | 3.94755  |
| 0 | 4.39645  |



|   |          |
|---|----------|
| 0 | 4.06815  |
| 0 | 4.19447  |
| 0 | 4.04674  |
| 0 | 4.06409  |
| 1 | -4.00271 |
| 0 | 4.18947  |
| 0 | 4.03804  |
| 1 | -3.97576 |
| 0 | 4.11149  |
| 1 | -3.82686 |
| 1 | -3.73542 |
| 1 | -3.88476 |
| 1 | -4.07311 |
| 1 | -4.04253 |
| 0 | 4.46935  |
| 0 | 3.84041  |
| 0 | 3.86158  |
| 0 | 3.86158  |
| 0 | 3.98286  |
| 0 | 3.96124  |
| 0 | 4.64792  |
| 1 | -3.79526 |
| 1 | -4.0768  |
| 1 | -3.88188 |
| 0 | 4.01251  |
| 0 | 4.01251  |
| 0 | 3.82272  |
| 0 | 3.82272  |
| 1 | -3.84862 |
| 0 | 3.86797  |
| 0 | 3.91241  |
| 0 | 3.92171  |
| 0 | 4.34978  |
| 0 | 4.24737  |
| 1 | -4.09109 |
| 1 | -4.09109 |
| 0 | 3.90518  |
| 0 | 4.22317  |
| 0 | 4.22317  |
| 1 | -3.90357 |
| 1 | -3.79508 |
| 0 | 4.39473  |
| 0 | 3.85866  |
| 0 | 3.85866  |
| 0 | 3.95476  |
| 1 | -3.97995 |
| 1 | -3.97995 |

|   |          |
|---|----------|
| 0 | 3.92559  |
| 0 | 3.92932  |
| 0 | 3.97721  |
| 0 | 4.03699  |
| 0 | 4.30775  |
| 0 | 4.06534  |
| 0 | 4.23097  |
| 0 | 3.96223  |
| 0 | 4.00052  |
| 0 | 3.92008  |
| 0 | 4.36096  |
| 0 | 3.82632  |
| 0 | 3.88842  |
| 0 | 4.163    |
| 1 | -4.11615 |
| 1 | -4.06085 |
| 0 | 3.83293  |
| 0 | 4.11502  |
| 0 | 4.02943  |
| 1 | -4.01874 |
| 1 | -3.80198 |
| 0 | 4.85812  |
| 0 | 3.89148  |
| 1 | -3.81805 |
| 0 | 4.10125  |
| 0 | 4.02646  |
| 0 | 4.29154  |
| 0 | 4.46226  |
| 1 | -3.81851 |
| 1 | -4.05352 |
| 0 | 3.88708  |
| 0 | 4.15309  |
| 0 | 3.92894  |
| 1 | -3.73881 |
| 0 | 4.21028  |
| 1 | -3.85122 |
| 0 | 4.29169  |
| 0 | 4.30049  |
| 0 | 4.30049  |
| 1 | -3.76185 |
| 1 | -3.74953 |
| 0 | 4.15366  |
| 0 | 4.1777   |
| 0 | 4.14209  |
| 0 | 4.10195  |
| 0 | 3.87098  |
| 1 | -4.09087 |

|   |          |
|---|----------|
| 1 | -3.86252 |
| 0 | 4.02453  |
| 0 | 4.3265   |
| 0 | 3.91747  |
| 0 | 4.24496  |
| 1 | -3.82144 |
| 0 | 3.87779  |
| 0 | 3.8749   |
| 0 | 4.07031  |
| 0 | 4.30607  |
| 1 | -3.97406 |
| 1 | -3.74372 |
| 1 | -4.02059 |
| 1 | -3.87367 |
| 1 | -3.87367 |
| 0 | 4.16102  |
| 0 | 4.08286  |
| 0 | 4.08286  |
| 1 | -3.83724 |
| 0 | 3.90362  |
| 0 | 4.05588  |
| 0 | 4.27024  |
| 0 | 3.82748  |
| 0 | 3.99757  |
| 1 | -4.13094 |
| 1 | -4.08249 |
| 0 | 4.07712  |
| 1 | -4.0535  |
| 0 | 4.25075  |
| 1 | -3.81593 |
| 1 | -4.15388 |
| 0 | 3.96108  |
| 0 | 4.50774  |
| 1 | -4.01056 |
| 1 | -4.1401  |
| 1 | -4.04484 |
| 1 | -4.09782 |
| 1 | -4.07109 |
| 0 | 4.0038   |
| 0 | 4.0038   |
| 1 | -3.73668 |
| 1 | -4.05972 |
| 1 | -3.81259 |
| 0 | 4.66086  |
| 1 | -3.94275 |
| 0 | 4.48029  |
| 0 | 3.95218  |

|   |          |
|---|----------|
| 1 | -3.79663 |
| 1 | -4.10245 |
| 0 | 3.98551  |
| 0 | 4.24684  |
| 0 | 4.09323  |
| 0 | 4.09323  |
| 0 | 3.85946  |
| 1 | -4.06682 |
| 1 | -3.75858 |
| 1 | -3.90737 |
| 0 | 3.94044  |
| 0 | 3.94044  |
| 0 | 4.09862  |
| 0 | 4.19811  |
| 0 | 4.19811  |
| 0 | 3.93024  |
| 1 | -4.12563 |
| 0 | 4.58539  |
| 0 | 4.01708  |
| 0 | 4.04735  |
| 0 | 4.16723  |
| 0 | 4.05658  |
| 1 | -3.9155  |
| 0 | 3.85954  |
| 0 | 4.17678  |
| 0 | 3.94047  |
| 0 | 4.00598  |
| 0 | 4.55455  |
| 0 | 4.06594  |
| 1 | -3.7287  |
| 0 | 4.30411  |
| 1 | -3.99907 |
| 0 | 4.17586  |
| 0 | 4.24778  |
| 0 | 3.94969  |
| 1 | -3.80481 |
| 0 | 4.01619  |
| 0 | 4.41553  |
| 0 | 3.86166  |
| 0 | 4.06686  |
| 0 | 4.27554  |
| 0 | 4.02434  |
| 0 | 3.97224  |
| 0 | 3.97224  |
| 0 | 4.07621  |
| 0 | 4.43685  |
| 0 | 4.00856  |

|   |          |
|---|----------|
| 0 | 4.17711  |
| 0 | 4.17711  |
| 0 | 4.47738  |
| 0 | 4.311    |
| 0 | 4.37801  |
| 1 | -4.0909  |
| 1 | -4.03724 |
| 0 | 4.62572  |
| 0 | 4.07328  |
| 0 | 4.09765  |
| 0 | 4.71087  |
| 0 | 4.02903  |
| 0 | 4.11167  |
| 0 | 4.16985  |
| 0 | 4.06136  |
| 0 | 3.83618  |
| 0 | 4.06916  |
| 0 | 3.93565  |
| 0 | 4.18893  |
| 0 | 4.19753  |
| 0 | 4.27088  |
| 1 | -3.97642 |
| 1 | -3.97642 |
| 1 | -3.72719 |
| 0 | 4.40054  |
| 0 | 4.23495  |
| 0 | 4.23495  |
| 0 | 4.76777  |
| 0 | 4.76777  |
| 0 | 4.22277  |
| 0 | 4.01183  |
| 0 | 4.01577  |
| 0 | 4.02651  |
| 0 | 4.16048  |
| 0 | 4.14032  |
| 0 | 4.40283  |
| 0 | 3.85366  |
| 0 | 4.0652   |
| 1 | -3.9214  |
| 1 | -3.9214  |
| 0 | 4.00272  |
| 0 | 4.0855   |
| 0 | 4.0855   |
| 0 | 4.24236  |
| 0 | 4.24236  |
| 0 | 4.05343  |
| 0 | 3.85138  |

|   |          |
|---|----------|
| 0 | 3.91956  |
| 0 | 4.20976  |
| 0 | 4.51317  |
| 0 | 4.3349   |
| 1 | -3.73116 |
| 0 | 4.04434  |
| 1 | -4.02254 |
| 0 | 4.45992  |
| 1 | -3.76489 |
| 1 | -3.85608 |
| 1 | -3.85862 |
| 1 | -3.84539 |
| 0 | 4.20578  |
| 0 | 4.21928  |
| 1 | -4.02023 |
| 1 | -3.88524 |
| 0 | 4.1789   |
| 1 | -3.91027 |
| 1 | -4.10942 |
| 0 | 4.09299  |
| 0 | 3.85289  |
| 0 | 4.3257   |
| 0 | 4.34381  |
| 1 | -3.97355 |
| 0 | 4.04425  |
| 0 | 4.77938  |
| 1 | -4.0186  |
| 1 | -4.01067 |
| 0 | 4.04382  |
| 1 | -3.73127 |
| 0 | 4.06179  |
| 1 | -3.75457 |
| 0 | 4.09828  |
| 0 | 4.0665   |
| 0 | 4.0633   |
| 1 | -3.9405  |
| 0 | 3.86892  |
| 0 | 4.03038  |
| 0 | 4.03038  |
| 0 | 3.93001  |
| 0 | 3.88726  |
| 0 | 3.99961  |
| 0 | 4.07634  |
| 1 | -4.0872  |
| 0 | 4.08191  |
| 0 | 3.92536  |
| 1 | -4.12952 |

|   |          |
|---|----------|
| 0 | 3.89518  |
| 1 | -3.99021 |
| 1 | -3.72672 |
| 1 | -3.96795 |
| 1 | -3.93456 |
| 1 | -4.02143 |
| 0 | 4.1366   |
| 0 | 4.13581  |
| 1 | -3.79024 |
| 1 | -3.88784 |
| 1 | -3.90465 |
| 1 | -3.77067 |
| 1 | -3.77164 |
| 0 | 3.85586  |
| 0 | 4.11167  |
| 0 | 4.15026  |
| 0 | 4.11341  |
| 0 | 4.09467  |
| 0 | 3.95446  |
| 0 | 3.95446  |
| 0 | 4.08459  |
| 1 | -3.76586 |
| 1 | -3.93706 |
| 1 | -4.01875 |
| 0 | 4.17467  |
| 0 | 4.16363  |
| 0 | 4.00603  |
| 1 | -3.97175 |
| 1 | -3.79555 |
| 1 | -3.72318 |
| 1 | -4.10509 |
| 0 | 4.1011   |
| 1 | -3.99936 |
| 1 | -3.79065 |
| 1 | -3.74895 |
| 0 | 3.87758  |
| 1 | -4.10389 |
| 1 | -3.73577 |
| 0 | 4.3254   |
| 1 | -4.06933 |
| 1 | -4.17821 |
| 1 | -3.83397 |
| 0 | 3.85207  |
| 1 | -3.96337 |
| 0 | 3.92469  |
| 0 | 3.92469  |
| 0 | 4.02489  |

|   |          |
|---|----------|
| 1 | -3.78692 |
| 1 | -3.74304 |
| 1 | -4.00101 |
| 1 | -3.80628 |
| 1 | -4.10998 |
| 0 | 3.91528  |
| 0 | 3.88382  |
| 1 | -3.95493 |
| 1 | -3.79245 |
| 1 | -3.92588 |
| 0 | 4.40893  |
| 1 | -3.81467 |
| 1 | -3.76367 |
| 1 | -4.09814 |
| 0 | 3.90076  |
| 0 | 4.09619  |
| 1 | -3.73708 |
| 0 | 3.82432  |
| 0 | 4.43277  |
| 0 | 4.81686  |
| 1 | -3.79504 |
| 0 | 4.10334  |
| 0 | 4.10334  |
| 0 | 3.99154  |
| 0 | 4.07625  |
| 1 | -4.03938 |
| 0 | 4.12194  |
| 0 | 3.95694  |
| 1 | -3.7908  |
| 1 | -4.01592 |
| 0 | 4.09672  |
| 1 | -4.03112 |
| 0 | 4.0473   |
| 0 | 4.0473   |
| 1 | -3.75471 |
| 0 | 4.22865  |
| 0 | 4.20155  |
| 0 | 3.92042  |
| 0 | 4.26524  |
| 0 | 4.02929  |
| 1 | -3.75354 |
| 0 | 3.84155  |
| 0 | 4.03964  |
| 1 | -4.01898 |
| 0 | 4.00949  |
| 0 | 4.02431  |
| 0 | 4.02158  |



|   |          |
|---|----------|
| 1 | -3.86664 |
| 0 | 3.84259  |
| 0 | 3.84259  |
| 0 | 3.91396  |
| 0 | 3.91396  |
| 1 | -4.12332 |
| 1 | -4.12332 |
| 1 | -3.84719 |
| 0 | 4.15357  |
| 0 | 4.04556  |
| 0 | 4.04556  |
| 1 | -3.85588 |
| 0 | 3.82701  |
| 0 | 3.87062  |
| 0 | 4.03765  |
| 0 | 3.95522  |
| 1 | -4.13629 |
| 1 | -4.1365  |
| 1 | -3.71803 |
| 0 | 3.85989  |
| 1 | -3.72698 |
| 1 | -4.0637  |
| 1 | -3.71952 |
| 0 | 4.59968  |
| 0 | 3.87062  |
| 1 | -3.86011 |
| 0 | 4.21394  |
| 0 | 4.50492  |
| 0 | 4.12267  |
| 0 | 4.22759  |
| 0 | 4.45322  |
| 0 | 3.83399  |
| 0 | 4.23065  |
| 0 | 4.00233  |
| 1 | -3.96167 |
| 0 | 3.84382  |
| 1 | -3.86835 |
| 1 | -3.80722 |
| 1 | -4.07465 |
| 0 | 3.85044  |
| 1 | -3.90372 |
| 0 | 4.13767  |
| 0 | 4.13767  |
| 0 | 4.02913  |
| 0 | 4.02913  |
| 0 | 3.95222  |
| 1 | -4.04657 |

|   |          |
|---|----------|
| 0 | 4.00562  |
| 0 | 4.53169  |
| 1 | -3.79127 |
| 0 | 4.39045  |
| 0 | 4.06981  |
| 0 | 3.94134  |
| 1 | -3.7381  |
| 1 | -4.09804 |
| 1 | -3.84747 |
| 1 | -3.86027 |
| 1 | -3.75291 |
| 1 | -3.83141 |
| 0 | 4.01276  |
| 1 | -4.11225 |
| 0 | 4.39165  |
| 1 | -3.72886 |
| 1 | -3.71757 |
| 0 | 4.045    |
| 1 | -3.84603 |
| 1 | -3.81423 |
| 0 | 3.9248   |
| 0 | 4.01244  |
| 0 | 4.33337  |
| 0 | 4.13908  |
| 0 | 4.27998  |
| 0 | 4.04897  |
| 0 | 4.44467  |
| 0 | 4.11273  |
| 1 | -4.15986 |
| 1 | -3.85871 |
| 0 | 4.36671  |
| 1 | -4.04168 |
| 1 | -3.78295 |
| 0 | 3.99598  |
| 0 | 3.9663   |
| 1 | -4.02008 |
| 0 | 4.03486  |
| 1 | -4.06145 |
| 0 | 3.85204  |
| 0 | 3.85204  |
| 1 | -4.01169 |
| 0 | 4.08338  |
| 0 | 4.2119   |
| 0 | 3.91256  |
| 1 | -4.07224 |
| 0 | 3.82796  |
| 0 | 4.10407  |

|   |          |
|---|----------|
| 0 | 3.83074  |
| 0 | 3.91313  |
| 0 | 4.34323  |
| 0 | 4.22121  |
| 0 | 4.05087  |
| 1 | -4.02058 |
| 0 | 4.50714  |
| 1 | -3.73923 |
| 0 | 4.01873  |
| 1 | -4.11241 |
| 1 | -3.75907 |
| 1 | -4.16074 |
| 1 | -3.90617 |
| 0 | 4.22988  |
| 0 | 4.16551  |
| 0 | 3.91196  |
| 0 | 3.95321  |
| 0 | 3.90284  |
| 0 | 4.16344  |
| 0 | 4.08421  |
| 0 | 4.12511  |
| 0 | 4.10479  |
| 0 | 4.01826  |
| 0 | 4.09454  |
| 0 | 4.01255  |
| 0 | 4.18432  |
| 1 | -4.01432 |
| 0 | 4.23583  |
| 0 | 4.15583  |
| 0 | 3.86814  |
| 0 | 4.13324  |
| 0 | 4.13324  |
| 0 | 4.07698  |
| 1 | -4.1521  |
| 0 | 4.11422  |
| 0 | 4.16595  |
| 1 | -3.82469 |
| 0 | 4.16721  |
| 0 | 3.90587  |
| 1 | -3.9963  |
| 0 | 4.18408  |
| 0 | 4.03267  |
| 0 | 4.03267  |
| 0 | 3.82405  |
| 0 | 3.82405  |
| 0 | 4.02901  |
| 1 | -3.85588 |

|   |          |
|---|----------|
| 0 | 4.06741  |
| 0 | 4.24414  |
| 1 | -4.11424 |
| 0 | 3.91567  |
| 0 | 3.91567  |
| 1 | -3.91264 |
| 1 | -4.1087  |
| 1 | -4.1087  |
| 1 | -3.74546 |
| 0 | 4.22336  |
| 0 | 4.30118  |
| 0 | 4.02404  |
| 0 | 3.94337  |
| 0 | 4.13494  |
| 1 | -3.80926 |
| 0 | 4.0452   |
| 0 | 4.06691  |
| 1 | -4.0927  |
| 0 | 3.82842  |
| 0 | 3.86416  |
| 1 | -4.16521 |
| 0 | 3.93411  |
| 1 | -4.1519  |
| 1 | -3.84096 |
| 1 | -3.85944 |
| 1 | -3.9305  |
| 1 | -4.06773 |
| 1 | -3.76906 |
| 1 | -3.76906 |
| 1 | -3.85881 |
| 0 | 4.21718  |
| 1 | -4.09532 |
| 1 | -4.09532 |
| 0 | 3.87725  |
| 0 | 4.00651  |
| 0 | 3.84023  |
| 1 | -3.74962 |
| 0 | 3.82212  |
| 0 | 3.87303  |
| 1 | -3.96551 |
| 1 | -4.12587 |
| 0 | 4.03676  |
| 0 | 3.87106  |
| 0 | 3.89234  |
| 1 | -3.88012 |
| 1 | -3.83908 |
| 1 | -3.83908 |

|   |          |
|---|----------|
| 1 | -3.75784 |
| 1 | -3.78518 |
| 0 | 4.16035  |
| 0 | 4.4182   |
| 0 | 4.24218  |
| 1 | -3.76173 |
| 0 | 4.00979  |
| 1 | -3.86415 |
| 0 | 3.8627   |
| 1 | -3.90223 |
| 1 | -3.81687 |
| 0 | 4.22068  |
| 1 | -3.86518 |
| 0 | 4.11487  |
| 1 | -3.81855 |
| 0 | 4.44795  |
| 1 | -3.77621 |
| 1 | -3.79739 |
| 0 | 3.98724  |
| 1 | -3.74886 |
| 1 | -3.74646 |
| 1 | -3.84154 |
| 0 | 3.94894  |
| 1 | -3.75515 |
| 1 | -4.0358  |
| 0 | 4.58829  |
| 1 | -4.06417 |
| 1 | -4.09577 |
| 1 | -4.07347 |
| 0 | 3.86989  |
| 1 | -3.95601 |
| 0 | 4.2016   |
| 1 | -3.83048 |
| 0 | 3.92764  |
| 0 | 3.98548  |
| 0 | 3.98548  |
| 0 | 3.91748  |
| 0 | 3.91748  |
| 0 | 4.02487  |
| 0 | 3.90512  |
| 1 | -3.77006 |
| 0 | 3.98823  |
| 1 | -3.72286 |
| 1 | -3.73718 |
| 0 | 4.29026  |
| 0 | 4.29026  |
| 1 | -4.17959 |

|      |          |
|------|----------|
| 1    | -4.17959 |
| 1    | -3.76165 |
| 1    | -3.73831 |
| 0    | 4.44231  |
| 0    | 3.87349  |
| 1    | -3.72468 |
| 0    | 4.19403  |
| 1    | -3.9976  |
| 1    | -3.9976  |
| 0    | 3.84426  |
| 1    | -3.76345 |
| 1    | -3.78902 |
| 0    | 3.95445  |
| 0    | 3.95445  |
| 1    | -3.74333 |
| 1    | -3.90053 |
| 1    | -3.81451 |
| 0    | 3.94543  |
| 1    | -3.72767 |
| 1    | -3.82547 |
| 0    | 4.01174  |
| 1    | -3.73697 |
| 1    | -3.80361 |
| 1    | -3.75292 |
| 1    | -3.98722 |
| 1    | -4.1588  |
| 1    | -4.09523 |
| 0    | 3.86864  |
| 1    | -3.94036 |
| 1    | -3.82726 |
| 1    | -4.05336 |
| 1    | -4.04463 |
| 0    | 3.93708  |
| 0    | 4.00846  |
| 0    | 3.87195  |
| 1    | -3.7923  |
| 0.25 | 4.49575  |
| 0.25 | 4.49575  |
| 0    | 4.22457  |
| 1    | -4.1305  |
| 1    | -4.16054 |
| 1    | -4.12011 |
| 1    | -4.12011 |
| 1    | -3.73672 |
| 0    | 4.06546  |
| 0    | 4.08298  |
| 0    | 4.41271  |

|   |          |
|---|----------|
| 0 | 4.41271  |
| 0 | 4.01547  |
| 0 | 4.00799  |
| 0 | 4.07469  |
| 0 | 4.621    |
| 0 | 4.26458  |
| 0 | 3.90787  |
| 0 | 3.96291  |
| 0 | 3.90719  |
| 1 | -4.08946 |
| 0 | 4.23303  |
| 1 | -4.05894 |
| 0 | 3.87933  |
| 0 | 3.87953  |
| 0 | 4.02313  |
| 0 | 3.95443  |
| 0 | 4.11688  |
| 1 | -4.10882 |
| 0 | 3.85913  |
| 0 | 4.11647  |
| 0 | 3.83337  |
| 0 | 4.2488   |
| 0 | 4.07561  |
| 0 | 4.13715  |
| 0 | 3.92519  |
| 0 | 4.03343  |
| 0 | 4.02489  |
| 1 | -3.72949 |
| 0 | 3.87287  |
| 0 | 4.06621  |
| 0 | 4.426    |
| 0 | 4.15018  |
| 0 | 4.43945  |
| 0 | 3.86821  |
| 0 | 4.07829  |
| 0 | 4.0082   |
| 0 | 3.83617  |
| 0 | 4.30785  |
| 0 | 4.87938  |
| 0 | 4.56835  |
| 0 | 3.87592  |
| 0 | 3.87592  |
| 0 | 4.00452  |
| 0 | 4.00452  |
| 1 | -4.0137  |
| 0 | 4.02116  |
| 0 | 4.03047  |

|   |          |
|---|----------|
| 0 | 4.21544  |
| 0 | 4.08015  |
| 0 | 4.06094  |
| 0 | 4.06094  |
| 0 | 4.08503  |
| 0 | 4.37789  |
| 0 | 4.63482  |
| 0 | 4.5585   |
| 1 | -3.75021 |
| 0 | 4.04936  |
| 0 | 4.00857  |
| 0 | 3.85922  |
| 0 | 3.91909  |
| 1 | -3.76657 |
| 0 | 3.89463  |
| 0 | 4.29748  |
| 1 | -3.7511  |
| 1 | -3.97961 |
| 0 | 4.06641  |
| 0 | 4.04637  |
| 0 | 3.90157  |
| 0 | 4.07397  |
| 1 | -3.97446 |
| 0 | 4.03835  |
| 1 | -4.15202 |
| 1 | -4.15202 |
| 0 | 3.83903  |
| 1 | -4.14812 |
| 0 | 3.90989  |
| 1 | -3.82424 |
| 0 | 4.14101  |
| 1 | -4.07409 |
| 0 | 4.02225  |
| 1 | -3.81027 |
| 0 | 4.0222   |
| 1 | -4.08174 |
| 1 | -4.08174 |
| 0 | 4.49962  |
| 0 | 4.49962  |
| 1 | -3.76783 |
| 1 | -3.91614 |
| 1 | -3.91614 |
| 1 | -4.13474 |
| 1 | -3.72984 |
| 0 | 4.20801  |
| 0 | 4.2943   |
| 0 | 4.2943   |



|   |          |
|---|----------|
| 1 | -3.79078 |
| 0 | 3.97718  |
| 0 | 4.37346  |
| 0 | 4.0658   |
| 1 | -3.75503 |
| 0 | 4.49547  |
| 0 | 4.10929  |
| 1 | -3.97263 |
| 0 | 3.89022  |
| 0 | 3.89022  |
| 0 | 4.3386   |
| 0 | 4.08464  |
| 1 | -4.00001 |
| 1 | -4.12707 |
| 0 | 4.08555  |
| 1 | -3.84959 |
| 1 | -4.03986 |
| 1 | -4.03986 |
| 1 | -3.83022 |
| 0 | 3.97899  |
| 0 | 3.90347  |
| 0 | 3.92065  |
| 0 | 3.9556   |
| 0 | 3.84245  |
| 1 | -4.09711 |
| 0 | 3.85178  |
| 0 | 4.1496   |
| 1 | -3.82586 |
| 1 | -4.01878 |
| 0 | 4.0086   |
| 1 | -3.72788 |
| 0 | 3.95374  |
| 0 | 3.90024  |
| 1 | -3.74642 |
| 1 | -3.83165 |
| 0 | 3.89912  |
| 1 | -4.01759 |
| 1 | -3.734   |
| 0 | 4.06986  |
| 0 | 4.18231  |
| 0 | 4.18231  |
| 0 | 3.85608  |
| 0 | 3.85608  |
| 1 | -4.11629 |
| 0 | 4.20736  |
| 0 | 4.41282  |
| 0 | 4.08316  |

|   |          |
|---|----------|
| 1 | -3.81442 |
| 0 | 3.86273  |
| 1 | -4.13838 |
| 0 | 4.19916  |
| 1 | -4.16872 |
| 0 | 4.14548  |
| 0 | 3.93673  |
| 1 | -4.10493 |
| 0 | 3.93751  |
| 1 | -3.81302 |
| 0 | 4.48213  |
| 0 | 4.48213  |
| 0 | 3.91191  |
| 0 | 4.0042   |
| 0 | 4.19473  |
| 0 | 4.1104   |
| 1 | -4.06814 |
| 1 | -4.09887 |
| 0 | 4.24164  |
| 1 | -3.77233 |
| 1 | -3.78842 |
| 1 | -3.78715 |
| 1 | -3.72645 |
| 0 | 4.04654  |
| 0 | 3.84639  |
| 1 | -3.77057 |
| 0 | 4.02137  |
| 0 | 4.71346  |
| 1 | -3.75174 |
| 1 | -3.75174 |
| 0 | 4.03981  |
| 0 | 4.43364  |
| 1 | -3.74001 |
| 1 | -4.04619 |
| 1 | -4.0462  |
| 1 | -4.0462  |
| 1 | -3.86061 |
| 1 | -3.98982 |
| 0 | 4.08899  |
| 1 | -4.15714 |
| 1 | -3.74167 |
| 1 | -3.74646 |
| 1 | -4.13107 |
| 0 | 4.22629  |
| 1 | -3.7901  |
| 1 | -4.08183 |
| 0 | 4.04069  |

|   |          |
|---|----------|
| 1 | -3.76122 |
| 1 | -3.72687 |
| 0 | 3.93699  |
| 0 | 3.93699  |
| 1 | -4.16949 |
| 1 | -3.79664 |
| 1 | -3.77639 |
| 0 | 4.08758  |
| 0 | 4.08758  |
| 0 | 3.97578  |
| 0 | 3.9825   |
| 0 | 3.9825   |
| 1 | -4.10397 |
| 0 | 3.96995  |
| 1 | -3.77266 |
| 1 | -3.94364 |
| 1 | -4.08758 |
| 0 | 4.0586   |
| 1 | -4.09163 |
| 1 | -3.77599 |
| 1 | -3.72135 |
| 0 | 3.98954  |
| 0 | 3.9349   |
| 0 | 4.09526  |
| 0 | 4.01465  |
| 0 | 4.58767  |
| 0 | 3.8819   |
| 0 | 3.8953   |
| 0 | 3.91767  |
| 0 | 3.92265  |
| 0 | 4.11146  |
| 0 | 4.00742  |
| 0 | 3.88435  |
| 0 | 4.02138  |
| 0 | 3.99034  |
| 0 | 4.10342  |
| 0 | 4.07881  |
| 0 | 4.07881  |
| 1 | -3.74131 |
| 0 | 4.24256  |
| 0 | 4.80286  |
| 0 | 4.12304  |
| 1 | -3.73288 |
| 1 | -4.05591 |
| 1 | -4.04001 |
| 0 | 3.8318   |
| 0 | 4.01194  |

|   |          |
|---|----------|
| 1 | -3.98185 |
| 1 | -3.71933 |
| 1 | -3.87469 |
| 1 | -4.00574 |
| 0 | 4.12013  |
| 1 | -3.80326 |
| 1 | -3.83809 |
| 0 | 4.01446  |
| 1 | -4.01998 |
| 0 | 4.03432  |
| 1 | -3.82395 |
| 1 | -4.03139 |
| 1 | -3.9815  |
| 0 | 4.89502  |
| 0 | 4.58429  |
| 0 | 4.12819  |
| 0 | 4.19541  |
| 1 | -3.78058 |
| 1 | -3.98334 |
| 0 | 4.27536  |
| 0 | 3.96161  |
| 0 | 3.85768  |
| 0 | 4.21923  |
| 0 | 3.85106  |
| 0 | 3.85106  |
| 0 | 4.26308  |
| 1 | -4.03704 |
| 1 | -4.04292 |
| 1 | -3.82923 |
| 1 | -4.17646 |
| 1 | -4.12854 |
| 1 | -4.12854 |
| 1 | -3.73239 |
| 0 | 4.27109  |
| 0 | 4.07276  |
| 0 | 3.82698  |
| 1 | -4.1349  |
| 0 | 3.91097  |
| 1 | -3.96012 |
| 0 | 4.10114  |
| 0 | 3.92247  |
| 0 | 4.1203   |
| 1 | -3.72935 |
| 0 | 3.8818   |
| 0 | 3.85558  |
| 0 | 3.95895  |
| 1 | -4.05681 |

|   |          |
|---|----------|
| 0 | 4.12262  |
| 1 | -4.09814 |
| 1 | -3.78179 |
| 0 | 4.28893  |
| 0 | 4.17203  |
| 0 | 4.14586  |
| 0 | 3.94731  |
| 0 | 4.17587  |
| 0 | 4.2636   |
| 0 | 4.06662  |
| 0 | 3.86835  |
| 1 | -3.79399 |
| 0 | 4.28755  |
| 1 | -3.91506 |
| 1 | -3.98344 |
| 1 | -3.9887  |
| 0 | 4.05317  |
| 1 | -3.87672 |
| 0 | 4.45809  |
| 1 | -3.82059 |
| 0 | 3.98381  |
| 0 | 4.84876  |
| 0 | 4.0856   |
| 0 | 4.26017  |
| 0 | 4.05358  |
| 0 | 3.89621  |
| 1 | -3.78198 |
| 1 | -4.0523  |
| 0 | 4.57771  |
| 0 | 3.9585   |
| 1 | -4.0806  |
| 0 | 3.84672  |
| 1 | -3.72528 |
| 0 | 3.94533  |
| 0 | 4.5744   |
| 0 | 4.06532  |
| 0 | 4.14878  |
| 0 | 4.03089  |
| 0 | 4.24833  |
| 0 | 3.88432  |
| 0 | 3.90875  |
| 0 | 4.00145  |
| 0 | 4.00646  |
| 0 | 4.0172   |
| 0 | 4.25868  |
| 0 | 4.2521   |
| 0 | 3.85033  |

|   |          |
|---|----------|
| 0 | 3.85033  |
| 0 | 4.22171  |
| 0 | 4.22171  |
| 0 | 4.1523   |
| 0 | 4.11801  |
| 0 | 4.44778  |
| 0 | 4.11006  |
| 0 | 3.8318   |
| 1 | -3.81005 |
| 1 | -3.94161 |
| 0 | 4.19929  |
| 1 | -4.04375 |
| 1 | -3.8548  |
| 0 | 4.24953  |
| 0 | 4.13712  |
| 0 | 3.88562  |
| 0 | 4.06096  |
| 0 | 4.60746  |
| 0 | 3.82938  |
| 0 | 4.8879   |
| 0 | 3.90351  |
| 0 | 4.80978  |
| 0 | 4.68889  |
| 0 | 4.17384  |
| 0 | 4.30806  |
| 1 | -4.00645 |
| 1 | -4.00117 |
| 1 | -3.85155 |
| 0 | 3.97372  |
| 0 | 4.21207  |
| 0 | 4.29098  |
| 0 | 3.82523  |
| 0 | 3.93914  |
| 0 | 4.03285  |
| 0 | 3.97841  |
| 0 | 4.00821  |
| 0 | 3.9211   |
| 0 | 3.9211   |
| 0 | 3.90426  |
| 1 | -3.77275 |
| 0 | 4.03718  |
| 0 | 4.17412  |
| 0 | 4.01364  |
| 0 | 4.41253  |
| 0 | 4.39854  |
| 0 | 4.24749  |
| 0 | 4.01486  |

|   |          |
|---|----------|
| 0 | 4.04034  |
| 0 | 3.95969  |
| 0 | 4.16215  |
| 0 | 3.92475  |
| 1 | -4.03113 |
| 0 | 4.54541  |
| 0 | 4.25074  |
| 0 | 4.64349  |
| 0 | 3.95065  |
| 0 | 4.38719  |
| 1 | -3.7479  |
| 0 | 4.60428  |
| 1 | -3.77519 |
| 1 | -3.81783 |
| 0 | 4.40202  |
| 0 | 3.96355  |
| 0 | 3.85183  |
| 0 | 4.12337  |
| 1 | -3.91807 |
| 0 | 4.11355  |
| 0 | 4.11355  |
| 0 | 4.71069  |
| 0 | 4.23533  |
| 0 | 4.35634  |
| 1 | -4.13682 |
| 0 | 4.01273  |
| 1 | -3.73911 |
| 0 | 4.27555  |
| 0 | 4.22092  |
| 0 | 4.22092  |
| 0 | 4.44011  |
| 1 | -3.81926 |
| 1 | -4.04359 |
| 0 | 4.01045  |
| 0 | 4.5594   |
| 0 | 4.01585  |
| 0 | 4.45222  |
| 0 | 4.45222  |
| 0 | 4.44287  |
| 0 | 3.84196  |
| 1 | -3.72487 |
| 0 | 3.92643  |
| 1 | -3.84759 |
| 0 | 4.05409  |
| 0 | 4.05409  |
| 0 | 4.21428  |
| 0 | 4.10493  |

|   |          |
|---|----------|
| 1 | -4.00154 |
| 0 | 4.01906  |
| 0 | 4.01906  |
| 0 | 4.53982  |
| 1 | -4.04428 |
| 1 | -4.06864 |
| 1 | -3.75678 |
| 0 | 3.94387  |
| 1 | -4.0894  |
| 0 | 3.8456   |
| 0 | 3.8456   |
| 1 | -3.82316 |
| 0 | 4.02802  |
| 1 | -4.07129 |
| 1 | -3.88103 |
| 1 | -4.06928 |
| 1 | -3.82698 |
| 1 | -4.11627 |



## Gene List WT H3K9me3

| chromosome | feature start | feature end | feature      | chromosome | region start | region end |
|------------|---------------|-------------|--------------|------------|--------------|------------|
| 1          | 196499434     | 196507933   | BC051045     | chr1       | 196502716    | 196503375  |
| 1          | 196314553     | 196323270   | NM_008882    | chr1       | 196321377    | 196322070  |
| 1          | 195060346     | 195077006   | NM_144817    | chr1       | 195063208    | 195063870  |
| 1          | 193671990     | 193680652   | NM_023727    | chr1       | 193674125    | 193674787  |
| 1          | 189956811     | 189965322   | NM_021408    | chr1       | 189958395    | 189959397  |
| 1          | 189692647     | 189701224   | NM_011935    | chr1       | 189699949    | 189700565  |
| 1          | 188655296     | 188670703   | NM_033077    | chr1       | 188667314    | 188668289  |
| 1          | 182981662     | 182990161   | NM_030131    | chr1       | 182989258    | 182989850  |
| 1          | 182399648     | 182408149   | NM_007415    | chr1       | 182404466    | 182405162  |
| 1          | 182317535     | 182326143   | BC120654     | chr1       | 182319432    | 182320019  |
| 2          | 181761309     | 181773112   | NM_153594    | chr2       | 181763437    | 181764077  |
| 2          | 181638371     | 181647608   | NM_011012    | chr2       | 181642850    | 181643443  |
| 2          | 181110712     | 181119270   | NM_025598    | chr2       | 181115980    | 181116941  |
| 2          | 180890673     | 180899193   | NM_145760    | chr2       | 180891952    | 180892828  |
| 2          | 180602336     | 180610835   | BC044755     | chr2       | 180604330    | 180605157  |
| 2          | 180587940     | 180596439   | BC039702     | chr2       | 180588762    | 180589381  |
| 2          | 180569391     | 180578099   | NM_178254    | chr2       | 180573186    | 180573964  |
| 2          | 179995200     | 180003700   | NM_181424    | chr2       | 180001572    | 180002190  |
| 2          | 179365886     | 179374474   | NM_009867    | chr2       | 179371076    | 179371754  |
| 2          | 178354015     | 178362514   | NM_198656    | chr2       | 178360875    | 178361494  |
| 1          | 177326566     | 177335175   | NM_011880    | chr1       | 177330927    | 177331524  |
| 1          | 175967421     | 175975920   | NM_146721    | chr1       | 175971728    | 175972328  |
| 1          | 175967421     | 175975920   | NM_146721    | chr1       | 175969537    | 175970269  |
| 1          | 175952223     | 175960722   | NM_001005520 | chr1       | 175957748    | 175958356  |
| 1          | 175930135     | 175938634   | NM_001011844 | chr1       | 175935052    | 175936009  |
| 1          | 175816890     | 175825389   | NM_011940    | chr1       | 175821893    | 175822483  |
| 1          | 175201776     | 175210370   | NM_053199    | chr1       | 175207041    | 175207962  |
| 1          | 174965412     | 174973911   | NM_146764    | chr1       | 174973256    | 174973872  |
| 2          | 174847297     | 174855796   | U62393       | chr2       | 174850973    | 174851579  |
| 1          | 174207221     | 174215730   | NM_026234    | chr1       | 174215002    | 174215680  |
| 2          | 173964707     | 173975778   | BC062654     | chr2       | 173969274    | 173970077  |
| 1          | 173512684     | 173521229   | NM_007649    | chr1       | 173514795    | 173515503  |
| 2          | 173374510     | 173383020   | NM_019806    | chr2       | 173374839    | 173375494  |
| 2          | 173159539     | 173168038   | BC050790     | chr2       | 173164150    | 173164745  |
| 1          | 172810204     | 172819222   | NM_001077189 | chr1       | 172810585    | 172811178  |
| 2          | 172658852     | 172667396   | NM_019547    | chr2       | 172666393    | 172667004  |
| 2          | 172658852     | 172667396   | NM_019547    | chr2       | 172659773    | 172660472  |
| 2          | 172580733     | 172589232   | NM_007557    | chr2       | 172581627    | 172582367  |
| 1          | 172063546     | 172072045   | NM_001033499 | chr1       | 172067222    | 172068498  |
| 2          | 172030814     | 172039321   | NM_025912    | chr2       | 172034980    | 172035666  |
| 1          | 171365573     | 171374139   | NM_023284    | chr1       | 171367904    | 171368559  |
| 1          | 165945939     | 165954438   | NM_011347    | chr1       | 165953480    | 165954116  |
| 2          | 165844346     | 165852868   | NM_028072    | chr2       | 165849627    | 165850507  |
| X          | 165217769     | 165226268   | BC053704     | chrX       | 165221311    | 165221936  |

|   |           |           |              |           |           |           |           |
|---|-----------|-----------|--------------|-----------|-----------|-----------|-----------|
| X | 165166264 | 165174763 | AF026565     | chrX      | 165173950 | 165174735 |           |
| X | 165023355 | 165031854 | NM_010797    | chrX      | 165031050 | 165031808 |           |
| X | 165023355 | 165031854 | NM_010797    | chrX      | 165029900 | 165030922 |           |
|   | 2         | 164923425 | 164931924    | NM_174988 | chr2      | 164927072 | 164927727 |
| X | 164661197 | 164670399 | NM_008222    | chrX      | 164663486 | 164664259 |           |
| X | 164015445 | 164024007 | NM_010832    | chrX      | 164016056 | 164017253 |           |
|   | 2         | 163974724 | 163983223    | NM_021363 | chr2      | 163979075 | 163979854 |
|   | 2         | 163860031 | 163868554    | NM_008435 | chr2      | 163862373 | 163863127 |
|   | 1         | 163561783 | 163570359    | BC057865  | chr1      | 163567881 | 163568680 |
|   | 1         | 162818164 | 162826665    | NM_080844 | chr1      | 162819146 | 162819752 |
| X | 162671656 | 162680633 | NM_133211    | chrX      | 162674089 | 162674708 |           |
| X | 162605412 | 162613911 | NM_133212    | chrX      | 162610467 | 162611204 |           |
| X | 162605412 | 162613911 | NM_133212    | chrX      | 162608274 | 162608942 |           |
| X | 162550740 | 162559323 | NM_021278    | chrX      | 162556001 | 162556793 |           |
| X | 162550740 | 162559323 | NM_021278    | chrX      | 162553936 | 162555130 |           |
| X | 162550740 | 162559323 | NM_021278    | chrX      | 162550134 | 162551587 |           |
|   | 1         | 162046955 | 162055454    | NM_009786 | chr1      | 162048378 | 162049022 |
|   | 1         | 161987720 | 161996219    | NM_177839 | chr1      | 161992162 | 161993072 |
| X | 161927308 | 161935821 | NM_019397    | chrX      | 161932518 | 161933052 |           |
| X | 161852084 | 161860583 | NM_001007577 | chrX      | 161853343 | 161854197 |           |
| X | 161821260 | 161833713 | NM_019773    | chrX      | 161827134 | 161827901 |           |
| X | 161821260 | 161833713 | NM_019773    | chrX      | 161824582 | 161825237 |           |
| X | 161778860 | 161787405 | NM_025432    | chrX      | 161778871 | 161779988 |           |
| X | 161682797 | 161691296 | AF254875     | chrX      | 161688523 | 161689159 |           |
|   | 2         | 160797998 | 160806516    | NM_173368 | chr2      | 160798668 | 160799369 |
| X | 160668587 | 160677498 | NM_183427    | chrX      | 160675553 | 160676138 |           |
| X | 160334006 | 160342505 | BC022692     | chrX      | 160339564 | 160340268 |           |
| X | 160334006 | 160342505 | BC022692     | chrX      | 160337986 | 160338626 |           |
| X | 160334006 | 160342505 | BC022692     | chrX      | 160334021 | 160334660 |           |
| X | 160318807 | 160327316 | NM_175027    | chrX      | 160325392 | 160325989 |           |
| X | 160321907 | 160330440 | NM_029730    | chrX      | 160325392 | 160325989 |           |
| X | 159836008 | 159853010 | NM_027027    | chrX      | 159850756 | 159851594 |           |
| X | 159775099 | 159784709 | NM_026853    | chrX      | 159781372 | 159782447 |           |
| X | 159775099 | 159784709 | NM_026853    | chrX      | 159775813 | 159776412 |           |
| X | 159599785 | 159608298 | NM_009759    | chrX      | 159600031 | 159600685 |           |
|   | 3         | 159529602 | 159538109    | NM_029987 | chr3      | 159535996 | 159536729 |
| X | 159478585 | 159487236 | NM_027286    | chrX      | 159478948 | 159479818 |           |
| X | 159417655 | 159426245 | NM_009173    | chrX      | 159419792 | 159420381 |           |
| X | 159417655 | 159426245 | NM_009173    | chrX      | 159417670 | 159418436 |           |
| X | 159369567 | 159378102 | NM_019513    | chrX      | 159374481 | 159375086 |           |
| X | 159247265 | 159255764 | NM_026887    | chrX      | 159253550 | 159255637 |           |
| X | 159247265 | 159255764 | NM_026887    | chrX      | 159251942 | 159252853 |           |
| X | 159102866 | 159111434 | NM_028842    | chrX      | 159104346 | 159104944 |           |
|   | 2         | 158350839 | 158361078    | NM_153089 | chr2      | 158357596 | 158358242 |
| X | 158306154 | 158314704 | NM_009789    | chrX      | 158313093 | 158313701 |           |
| X | 158239392 | 158248788 | NM_018737    | chrX      | 158247336 | 158247822 |           |
| X | 158171001 | 158179559 | NM_178935    | chrX      | 158175792 | 158176551 |           |

|   |   |           |           |              |      |           |           |
|---|---|-----------|-----------|--------------|------|-----------|-----------|
| X |   | 158098538 | 158107063 | NM_009031    | chrX | 158105337 | 158106362 |
| X |   | 158098538 | 158107063 | NM_009031    | chrX | 158101137 | 158102167 |
|   | 3 | 157956005 | 157977904 | NM_026989    | chr3 | 157959775 | 157960401 |
| X |   | 157904921 | 157913437 | NM_019883    | chrX | 157909631 | 157910397 |
|   | 1 | 157791621 | 157805634 | NM_022329    | chr1 | 157799013 | 157799694 |
|   | 1 | 157796014 | 157804637 | NM_144791    | chr1 | 157799013 | 157799694 |
|   | 1 | 157732606 | 157741402 | BC089561     | chr1 | 157734158 | 157734950 |
|   | 2 | 157600206 | 157608705 | NM_198627    | chr2 | 157605918 | 157606588 |
|   | 3 | 157463680 | 157478860 | NM_017381    | chr3 | 157468630 | 157469348 |
|   | 3 | 157463680 | 157478860 | NM_017381    | chr3 | 157467493 | 157468098 |
|   | 1 | 157314337 | 157323245 | NM_028250    | chr1 | 157319665 | 157320281 |
| X |   | 157055732 | 157064231 | NM_198409    | chrX | 157060730 | 157061590 |
|   | 2 | 157035539 | 157044096 | NM_010285    | chr2 | 157038979 | 157039728 |
|   | 2 | 156964511 | 156977523 | NM_019642    | chr2 | 156970252 | 156970953 |
|   | 2 | 156968247 | 156976916 | NM_001039557 | chr2 | 156970252 | 156970953 |
| X |   | 156455298 | 156470872 | AF285577     | chrX | 156469849 | 156470852 |
| X |   | 156455298 | 156470872 | AF285577     | chrX | 156462826 | 156464131 |
| X |   | 156455298 | 156470872 | AF285577     | chrX | 156461400 | 156462187 |
| X |   | 156455298 | 156470872 | AF285577     | chrX | 156459542 | 156460722 |
|   | 2 | 156161278 | 156169777 | NM_001006664 | chr2 | 156167540 | 156168133 |
|   | 2 | 156161278 | 156169777 | NM_001006664 | chr2 | 156162277 | 156162887 |
| X |   | 156106118 | 156114754 | NM_011302    | chrX | 156109699 | 156110594 |
|   | 2 | 155634297 | 155642808 | NM_008109    | chr2 | 155637336 | 155637945 |
|   | 2 | 155634297 | 155642808 | NM_008109    | chr2 | 155634912 | 155635583 |
| X |   | 155479942 | 155488461 | NM_008810    | chrX | 155485157 | 155485753 |
|   | 2 | 155418328 | 155426866 | NM_145537    | chr2 | 155421861 | 155422473 |
|   | 1 | 155309429 | 155317932 | NM_028749    | chr1 | 155315071 | 155315670 |
| X |   | 155046706 | 155055268 | NM_021389    | chrX | 155052853 | 155054767 |
| X |   | 155046706 | 155055268 | NM_021389    | chrX | 155051803 | 155052838 |
| X |   | 155046706 | 155055268 | NM_021389    | chrX | 155048331 | 155049268 |
| X |   | 155046706 | 155055268 | NM_021389    | chrX | 155046827 | 155047476 |
| X |   | 154710337 | 154718862 | NM_025437    | chrX | 154716957 | 154717450 |
| X |   | 154594225 | 154602724 | NM_148945    | chrX | 154600678 | 154601437 |
| X |   | 154594225 | 154602724 | NM_148945    | chrX | 154597403 | 154599316 |
|   | 4 | 154542924 | 154551434 | NM_026899    | chr4 | 154545708 | 154546797 |
|   | 1 | 154522854 | 154531368 | NM_026369    | chr1 | 154530096 | 154530804 |
|   | 2 | 154258776 | 154267293 | NM_007891    | chr2 | 154259468 | 154260054 |
|   | 4 | 154187044 | 154195572 | NM_001039079 | chr4 | 154187164 | 154187815 |
|   | 2 | 153992685 | 154001184 | NM_001025574 | chr2 | 153998469 | 153999051 |
|   | 2 | 153943295 | 153951819 | NM_175167    | chr2 | 153944282 | 153944944 |
|   | 4 | 153707385 | 153717928 | NM_013783    | chr4 | 153716909 | 153717777 |
| X |   | 153384716 | 153393215 | NM_177751    | chrX | 153385118 | 153386215 |
| X |   | 153037223 | 153045816 | NM_025357    | chrX | 153040107 | 153040710 |
| X |   | 152940248 | 152948755 | NM_178266    | chrX | 152942895 | 152943627 |
| X |   | 152940248 | 152948755 | NM_178266    | chrX | 152941592 | 152942507 |
|   | 2 | 152926973 | 152935503 | NM_080463    | chr2 | 152929395 | 152930106 |
|   | 2 | 152914325 | 152922824 | NM_198617    | chr2 | 152921030 | 152921842 |

|   |   |           |           |              |      |           |           |
|---|---|-----------|-----------|--------------|------|-----------|-----------|
|   | 4 | 152867451 | 152875952 | NM_001033144 | chr4 | 152870143 | 152870802 |
|   | 2 | 152372589 | 152382842 | NM_025543    | chr2 | 152379106 | 152379971 |
|   | 2 | 152372589 | 152382842 | NM_025543    | chr2 | 152377039 | 152378585 |
|   | 2 | 152372589 | 152382842 | NM_025543    | chr2 | 152375963 | 152376553 |
|   | 2 | 152269239 | 152277753 | NM_145157    | chr2 | 152275095 | 152276240 |
|   | 2 | 152063234 | 152074039 | NM_001009948 | chr2 | 152063463 | 152064047 |
|   | 1 | 152025771 | 152037479 | BC086491     | chr1 | 152030998 | 152031582 |
|   | 1 | 152025771 | 152037479 | BC086491     | chr1 | 152027540 | 152028245 |
|   | 4 | 151135027 | 151152063 | NM_133788    | chr4 | 151143591 | 151144262 |
| X |   | 150961539 | 150970041 | BC116312     | chrX | 150961638 | 150963302 |
|   | 5 | 150860380 | 150868879 | NM_133898    | chr5 | 150863635 | 150864183 |
| X |   | 150676646 | 150685183 | NM_016764    | chrX | 150679408 | 150680332 |
| X |   | 150676646 | 150685183 | NM_016764    | chrX | 150677566 | 150678247 |
| X |   | 150554474 | 150563125 | NM_009121    | chrX | 150555196 | 150556565 |
| X |   | 150486066 | 150497970 | BC100353     | chrX | 150495586 | 150497372 |
| X |   | 150486066 | 150497970 | BC100353     | chrX | 150490314 | 150491470 |
| X |   | 150428007 | 150437540 | NM_020015    | chrX | 150428641 | 150430270 |
| X |   | 150393702 | 150408269 | NM_020018    | chrX | 150407635 | 150408242 |
| X |   | 150393702 | 150408269 | NM_020018    | chrX | 150405573 | 150406504 |
| X |   | 150370717 | 150380008 | NM_020016    | chrX | 150375549 | 150376418 |
| X |   | 150287786 | 150296285 | NM_020017    | chrX | 150294897 | 150295930 |
| X |   | 150287786 | 150296285 | NM_020017    | chrX | 150290375 | 150292537 |
| X |   | 150287786 | 150296285 | NM_020017    | chrX | 150289186 | 150290285 |
| X |   | 150263339 | 150272837 | NM_020019    | chrX | 150265394 | 150266383 |
| X |   | 150263339 | 150272837 | NM_020019    | chrX | 150264044 | 150265196 |
|   | 2 | 150140424 | 150148923 | BC023805     | chr2 | 150141475 | 150142230 |
|   | 4 | 149897544 | 149907753 | NM_009498    | chr4 | 149904708 | 149905427 |
|   | 4 | 149885773 | 149894389 | NM_011067    | chr4 | 149888462 | 149889204 |
|   | 2 | 149825605 | 149834119 | NM_181266    | chr2 | 149827381 | 149828347 |
| X |   | 149816718 | 149825217 | NM_029199    | chrX | 149816727 | 149817337 |
| X |   | 149167009 | 149175508 | NM_001005370 | chrX | 149172168 | 149172776 |
|   | 2 | 149090690 | 149099273 | NM_021405    | chr2 | 149091160 | 149092292 |
|   | 4 | 149075055 | 149089785 | NM_023119    | chr4 | 149079946 | 149080546 |
| X |   | 148893309 | 148901808 | NM_173367    | chrX | 148900142 | 148900761 |
|   | 5 | 148859878 | 148869138 | NM_011908    | chr5 | 148860710 | 148861438 |
| X |   | 148832947 | 148841447 | NM_018798    | chrX | 148840108 | 148840701 |
| X |   | 148694329 | 148702828 | BC070442     | chrX | 148700487 | 148701145 |
| X |   | 148694329 | 148702828 | BC070442     | chrX | 148697639 | 148698249 |
| X |   | 148474697 | 148483215 | NM_001004154 | chrX | 148481585 | 148482356 |
|   | 6 | 148161349 | 148175544 | NM_026168    | chr6 | 148174566 | 148175123 |
|   | 6 | 148161349 | 148175544 | NM_026168    | chr6 | 148167112 | 148167724 |
|   | 2 | 148080783 | 148089282 | NM_009219    | chr2 | 148087256 | 148087897 |
|   | 5 | 147826251 | 147842581 | BC086321     | chr5 | 147829299 | 147829891 |
| X |   | 147680621 | 147694343 | NM_029836    | chrX | 147685698 | 147686314 |
| X |   | 147351144 | 147359643 | NM_019710    | chrX | 147358197 | 147358807 |
| X |   | 147354506 | 147363026 | NM_025660    | chrX | 147358197 | 147358807 |
| X |   | 147351144 | 147359643 | NM_019710    | chrX | 147351347 | 147351720 |

|   |   |           |           |              |      |           |           |
|---|---|-----------|-----------|--------------|------|-----------|-----------|
|   | 4 | 147341750 | 147350262 | NM_001039554 | chr4 | 147343486 | 147344329 |
|   | 5 | 147263273 | 147280123 | NM_029581    | chr5 | 147265013 | 147265603 |
| X |   | 147138043 | 147146560 | NM_021523    | chrX | 147145861 | 147146512 |
| X |   | 147138043 | 147146560 | NM_021523    | chrX | 147139331 | 147140485 |
|   | 4 | 147129198 | 147137730 | BC070441     | chr4 | 147132097 | 147132705 |
| X |   | 146855897 | 146864396 | NM_177201    | chrX | 146861825 | 146863577 |
| X |   | 146855897 | 146864396 | NM_177201    | chrX | 146859988 | 146860783 |
|   | 4 | 146689667 | 146698175 | NM_198619    | chr4 | 146691913 | 146692843 |
| X |   | 146678939 | 146687438 | NM_198105    | chrX | 146685263 | 146687171 |
| X |   | 146678939 | 146687438 | NM_198105    | chrX | 146683820 | 146684647 |
| X |   | 146678939 | 146687438 | NM_198105    | chrX | 146679931 | 146680540 |
|   | 6 | 146593749 | 146602269 | NM_025315    | chr6 | 146596846 | 146597438 |
|   | 1 | 146535135 | 146543646 | NM_022881    | chr1 | 146535422 | 146536281 |
|   | 3 | 146430002 | 146443139 | NM_027617    | chr3 | 146430672 | 146431273 |
|   | 3 | 146431222 | 146439775 | NM_010318    | chr3 | 146430672 | 146431273 |
| X |   | 146355461 | 146363964 | NM_198110    | chrX | 146358094 | 146359068 |
| X |   | 146355461 | 146363964 | NM_198110    | chrX | 146357057 | 146358010 |
| X |   | 146151878 | 146160998 | NM_030700    | chrX | 146152569 | 146153269 |
| X |   | 145987852 | 146004299 | NM_001002272 | chrX | 145997577 | 145998224 |
| X |   | 145987852 | 146004299 | NM_001002272 | chrX | 145994930 | 145995812 |
| X |   | 145924637 | 145933136 | NM_008824    | chrX | 145929813 | 145930415 |
| X |   | 145926324 | 145934865 | NM_029943    | chrX | 145929813 | 145930415 |
| X |   | 145924637 | 145933136 | NM_008824    | chrX | 145928039 | 145928759 |
| X |   | 145926324 | 145934865 | NM_029943    | chrX | 145928039 | 145928759 |
|   | 2 | 145899706 | 145916051 | NM_016889    | chr2 | 145904086 | 145904688 |
|   | 3 | 145810391 | 145818890 | BC086777     | chr3 | 145812392 | 145812984 |
|   | 3 | 145783635 | 145792134 | BC060266     | chr3 | 145790626 | 145791239 |
|   | 1 | 145763851 | 145772499 | NM_009061    | chr1 | 145764646 | 145765303 |
|   | 1 | 145530747 | 145545196 | NM_013835    | chr1 | 145539323 | 145539933 |
|   | 1 | 145533530 | 145542052 | NM_019562    | chr1 | 145539323 | 145539933 |
|   | 1 | 145462403 | 145470992 | NM_145991    | chr1 | 145464800 | 145465558 |
|   | 6 | 145066822 | 145081472 | NM_008511    | chr6 | 145081021 | 145081397 |
|   | 5 | 144437813 | 144447044 | NM_010800    | chr5 | 144438251 | 144438852 |
|   | 5 | 143872086 | 143880711 | NM_011182    | chr5 | 143876239 | 143876848 |
|   | 5 | 143439375 | 143451915 | NM_021326    | chr5 | 143444239 | 143444860 |
|   | 5 | 143440157 | 143449123 | NM_177880    | chr5 | 143444239 | 143444860 |
|   | 7 | 143277145 | 143287958 | NM_001042760 | chr7 | 143282773 | 143283377 |
|   | 7 | 143267773 | 143276386 | NM_009876    | chr7 | 143270586 | 143271273 |
|   | 7 | 143267773 | 143276386 | NM_009876    | chr7 | 143267773 | 143268555 |
| X |   | 143233392 | 143241891 | BC109131     | chrX | 143233398 | 143233968 |
|   | 5 | 143141014 | 143149513 | NM_001002769 | chr5 | 143147011 | 143147414 |
|   | 4 | 143050046 | 143058551 | NM_001007077 | chr4 | 143053687 | 143054285 |
|   | 3 | 142816847 | 142825376 | NM_178654    | chr3 | 142819013 | 142819598 |
|   | 4 | 142673113 | 142682173 | NM_172877    | chr4 | 142678867 | 142679829 |
| X |   | 142644800 | 142656200 | NM_008356    | chrX | 142655585 | 142656184 |
| X |   | 142644800 | 142656200 | NM_008356    | chrX | 142654354 | 142655310 |
| X |   | 142644800 | 142656200 | NM_008356    | chrX | 142646358 | 142646971 |

|   |   |           |           |              |      |           |           |
|---|---|-----------|-----------|--------------|------|-----------|-----------|
|   | 7 | 142464303 | 142474879 | NM_010514    | chr7 | 142472051 | 142473130 |
| X |   | 142202881 | 142211380 | NM_008312    | chrX | 142209817 | 142210824 |
|   | 7 | 142179140 | 142187649 | NM_177265    | chr7 | 142184958 | 142185558 |
|   | 7 | 142036862 | 142045361 | NM_001037822 | chr7 | 142043781 | 142044820 |
|   | 3 | 141866411 | 141874910 | BC065106     | chr3 | 141871082 | 141871667 |
|   | 6 | 141816078 | 141824577 | NM_030687    | chr6 | 141816636 | 141817248 |
|   | 7 | 141544512 | 141560657 | BC034197     | chr7 | 141558689 | 141559762 |
|   | 6 | 141480842 | 141489455 | NM_021471    | chr6 | 141486301 | 141486897 |
|   | 7 | 141292976 | 141330256 | NM_009842    | chr7 | 141316832 | 141317658 |
|   | 7 | 141237519 | 141246036 | NM_011528    | chr7 | 141242767 | 141243601 |
|   | 7 | 141184276 | 141192821 | NM_133191    | chr7 | 141190877 | 141191746 |
|   | 7 | 141187582 | 141196081 | BC046399     | chr7 | 141190877 | 141191746 |
|   | 4 | 141095580 | 141104079 | NM_007919    | chr4 | 141102082 | 141102694 |
|   | 5 | 140970601 | 140979100 | NM_173405    | chr5 | 140976622 | 140977212 |
|   | 7 | 140915595 | 140933597 | NM_019762    | chr7 | 140920106 | 140920832 |
|   | 7 | 140859517 | 140874228 | NM_025378    | chr7 | 140868551 | 140869162 |
|   | 7 | 140727714 | 140744619 | NM_011875    | chr7 | 140742662 | 140743306 |
|   | 7 | 140727714 | 140744619 | NM_011875    | chr7 | 140728916 | 140729633 |
|   | 4 | 140685558 | 140694085 | NM_019701    | chr4 | 140689497 | 140690089 |
|   | 4 | 140686855 | 140696304 | NM_013868    | chr4 | 140689497 | 140690089 |
| X |   | 140592763 | 140601318 | NM_178358    | chrX | 140594168 | 140594955 |
|   | 1 | 140375692 | 140384191 | AF217650     | chr1 | 140377768 | 140378448 |
|   | 4 | 140323238 | 140336275 | NM_172122    | chr4 | 140332327 | 140332912 |
|   | 4 | 140227347 | 140235951 | NM_023374    | chr4 | 140231298 | 140232164 |
|   | 7 | 140051589 | 140060088 | NM_001011814 | chr7 | 140055129 | 140055849 |
|   | 7 | 139740158 | 139748791 | NM_177261    | chr7 | 139748205 | 139748797 |
|   | 5 | 139670821 | 139679320 | NM_029771    | chr5 | 139675674 | 139676355 |
| X |   | 139558371 | 139566888 | NM_026247    | chrX | 139562217 | 139563386 |
| X |   | 139176794 | 139185679 | NM_010025    | chrX | 139179191 | 139180218 |
|   | 3 | 139137280 | 139145779 | NM_198659    | chr3 | 139142451 | 139143159 |
| X |   | 138906113 | 138914612 | U39738       | chrX | 138912933 | 138913620 |
| X |   | 138906113 | 138914612 | U39738       | chrX | 138908104 | 138909169 |
|   | 5 | 138846664 | 138855181 | NM_183025    | chr5 | 138846680 | 138847426 |
|   | 5 | 138847016 | 138855531 | NM_013844    | chr5 | 138846680 | 138847426 |
|   | 7 | 138821623 | 138830125 | BC119557     | chr7 | 138826268 | 138826851 |
|   | 5 | 138791983 | 138800482 | NM_029693    | chr5 | 138794795 | 138795394 |
|   | 5 | 138665292 | 138673791 | NM_028130    | chr5 | 138670414 | 138671031 |
| X |   | 138634017 | 138646552 | NM_031258    | chrX | 138638608 | 138639194 |
| X |   | 138634017 | 138646552 | NM_031258    | chrX | 138637571 | 138638472 |
| X |   | 138634017 | 138646552 | NM_031258    | chrX | 138636531 | 138637312 |
| X |   | 138634017 | 138646552 | NM_031258    | chrX | 138634695 | 138636324 |
|   | 3 | 138374551 | 138385173 | NM_007410    | chr3 | 138384553 | 138385086 |
|   | 7 | 138231019 | 138242073 | NM_183289    | chr7 | 138239430 | 138240042 |
| X |   | 138097652 | 138106151 | BC031534     | chrX | 138106101 | 138108188 |
|   | 5 | 138099047 | 138107546 | NM_001024932 | chr5 | 138104392 | 138104982 |
| X |   | 138097652 | 138106151 | BC031534     | chrX | 138103443 | 138105079 |
| X |   | 138097652 | 138106151 | BC031534     | chrX | 138101853 | 138103021 |

|   |   |           |           |           |      |           |           |
|---|---|-----------|-----------|-----------|------|-----------|-----------|
|   | 4 | 137991425 | 138000316 | NM_008868 | chr4 | 137992969 | 137993566 |
|   | 5 | 137967287 | 137977395 | NM_175521 | chr5 | 137968005 | 137968596 |
| X |   | 137921784 | 137930285 | NM_177592 | chrX | 137929595 | 137930250 |
| X |   | 137921784 | 137930285 | NM_177592 | chrX | 137926830 | 137927553 |
|   | 1 | 137646765 | 137659767 | NM_011619 | chr1 | 137650279 | 137651102 |
| X |   | 137634200 | 137642903 | NM_207625 | chrX | 137637864 | 137638955 |
| X |   | 137634200 | 137642903 | NM_207625 | chrX | 137635591 | 137636264 |
| X |   | 137468575 | 137477116 | NM_172782 | chrX | 137476019 | 137476666 |
| X |   | 137468575 | 137477116 | NM_172782 | chrX | 137475099 | 137475902 |
| X |   | 137468575 | 137477116 | NM_172782 | chrX | 137473470 | 137474485 |
| X |   | 137468575 | 137477116 | NM_172782 | chrX | 137472673 | 137473288 |
|   | 4 | 137259546 | 137268045 | NM_172703 | chr4 | 137265777 | 137266388 |
|   | 1 | 137244353 | 137252902 | NM_153774 | chr1 | 137246030 | 137246637 |
| X |   | 136969086 | 136977585 | NM_010572 | chrX | 136975694 | 136976320 |
| X |   | 136969086 | 136977585 | NM_010572 | chrX | 136971756 | 136973018 |
| X |   | 136969086 | 136977585 | NM_010572 | chrX | 136969080 | 136969903 |
|   | 6 | 136895475 | 136911913 | NM_007486 | chr6 | 136897648 | 136898245 |
| X |   | 136853994 | 136862493 | BC043317  | chrX | 136861454 | 136862067 |
|   | 2 | 136805232 | 136814136 | NM_013822 | chr2 | 136812546 | 136813134 |
| X |   | 136715787 | 136724447 | NM_007736 | chrX | 136718861 | 136719798 |
| X |   | 136717843 | 136726444 | NM_053185 | chrX | 136718861 | 136719798 |
|   | 6 | 136477047 | 136485563 | NM_019426 | chr6 | 136483774 | 136484369 |
|   | 6 | 136477047 | 136485563 | NM_019426 | chr6 | 136478854 | 136479550 |
|   | 1 | 136457092 | 136465591 | NM_009307 | chr1 | 136464271 | 136465315 |
| X |   | 136247984 | 136256515 | NM_030181 | chrX | 136248083 | 136248614 |
|   | 5 | 136026300 | 136034799 | NM_172541 | chr5 | 136031818 | 136032644 |
| X |   | 136005320 | 136013819 | NM_011845 | chrX | 136009954 | 136010967 |
|   | 1 | 135919749 | 135930152 | NM_027979 | chr1 | 135924272 | 135925084 |
| X |   | 135886460 | 135895549 | NM_010286 | chrX | 135892093 | 135892833 |
| X |   | 135886460 | 135895549 | NM_010286 | chrX | 135890621 | 135891394 |
| X |   | 135886460 | 135895549 | NM_010286 | chrX | 135886462 | 135887046 |
| X |   | 135796977 | 135805536 | NM_021463 | chrX | 135802139 | 135803021 |
|   | 3 | 135756878 | 135766171 | NM_026228 | chr3 | 135757059 | 135757836 |
| X |   | 135722335 | 135730834 | NM_177750 | chrX | 135729535 | 135730132 |
|   | 1 | 135720914 | 135729583 | NM_054076 | chr1 | 135722743 | 135723338 |
|   | 5 | 135648580 | 135657086 | NM_145414 | chr5 | 135654454 | 135655081 |
|   | 4 | 135552145 | 135564368 | NM_009557 | chr4 | 135562774 | 135563665 |
|   | 4 | 135552145 | 135564368 | NM_009557 | chr4 | 135561603 | 135562191 |
|   | 7 | 135532015 | 135540514 | BC053453  | chr7 | 135533127 | 135533724 |
| X |   | 135403243 | 135411745 | NM_177921 | chrX | 135406756 | 135407505 |
|   | 4 | 135242171 | 135250696 | NM_011942 | chr4 | 135248311 | 135248929 |
| X |   | 135215474 | 135224018 | NM_029413 | chrX | 135216664 | 135217283 |
| X |   | 135141192 | 135157524 | NM_016675 | chrX | 135156757 | 135157384 |
| X |   | 135141192 | 135157524 | NM_016675 | chrX | 135146199 | 135148185 |
| X |   | 135141192 | 135157524 | NM_016675 | chrX | 135144892 | 135145487 |
|   | 6 | 135080095 | 135089976 | NM_053118 | chr6 | 135085992 | 135086441 |
| X |   | 134950984 | 134959506 | NM_023270 | chrX | 134957183 | 134958342 |

|   |   |           |           |              |      |           |           |
|---|---|-----------|-----------|--------------|------|-----------|-----------|
| X |   | 134950984 | 134959506 | NM_023270    | chrX | 134956022 | 134956956 |
| X |   | 134950984 | 134959506 | NM_023270    | chrX | 134952192 | 134952919 |
| X |   | 134820807 | 134829330 | NM_175326    | chrX | 134826589 | 134827344 |
| X |   | 134674047 | 134682753 | NM_011635    | chrX | 134679179 | 134681044 |
| X |   | 134575254 | 134583753 | NM_175541    | chrX | 134582219 | 134582855 |
| X |   | 134575254 | 134583753 | NM_175541    | chrX | 134579507 | 134580179 |
|   | 4 | 134418572 | 134427071 | AF155880     | chr4 | 134419411 | 134420084 |
|   | 6 | 134356022 | 134364521 | NM_025778    | chr6 | 134363829 | 134364476 |
| X |   | 134254869 | 134263368 | NM_013724    | chrX | 134261329 | 134262117 |
| X |   | 134254869 | 134263368 | NM_013724    | chrX | 134257718 | 134258831 |
|   | 2 | 134243294 | 134251793 | NM_010403    | chr2 | 134244530 | 134245157 |
|   | 4 | 134189699 | 134205555 | NM_023665    | chr4 | 134197179 | 134197797 |
|   | 3 | 134167884 | 134179531 | NM_001004367 | chr3 | 134170742 | 134171538 |
|   | 7 | 133484288 | 133493005 | NM_145995    | chr7 | 133490586 | 133491205 |
|   | 7 | 133470036 | 133478548 | NM_178115    | chr7 | 133471906 | 133472433 |
|   | 4 | 133398330 | 133412213 | NM_080559    | chr4 | 133400065 | 133400683 |
|   | 4 | 133237568 | 133246067 | NM_016957    | chr4 | 133244203 | 133244792 |
|   | 1 | 133070206 | 133078724 | NM_018750    | chr1 | 133074996 | 133075633 |
|   | 3 | 133023257 | 133031758 | NM_027927    | chr3 | 133027862 | 133028481 |
|   | 3 | 133026547 | 133035339 | NM_026231    | chr3 | 133027862 | 133028481 |
|   | 4 | 132903006 | 132916759 | NM_001017968 | chr4 | 132903918 | 132904513 |
|   | 1 | 132764327 | 132772826 | NM_001009940 | chr1 | 132771421 | 132772295 |
|   | 6 | 132701180 | 132709679 | NM_207020    | chr6 | 132705166 | 132705840 |
|   | 7 | 132649040 | 132657539 | NM_212473    | chr7 | 132651892 | 132652489 |
|   | 3 | 132615474 | 132623993 | NM_173032    | chr3 | 132617655 | 132618347 |
|   | 6 | 132524669 | 132538034 | NM_011174    | chr6 | 132533112 | 132533717 |
|   | 2 | 132499577 | 132513496 | NM_175113    | chr2 | 132511610 | 132512208 |
|   | 2 | 132499577 | 132513496 | NM_175113    | chr2 | 132504614 | 132505209 |
| X |   | 132463985 | 132472690 | NM_007957    | chrX | 132464002 | 132464597 |
|   | 7 | 132435481 | 132443980 | NM_009123    | chr7 | 132437613 | 132438247 |
|   | 6 | 132404930 | 132413429 | NM_001004160 | chr6 | 132409665 | 132410632 |
|   | 4 | 132396654 | 132405208 | NM_153423    | chr4 | 132403635 | 132404333 |
| X |   | 132389993 | 132398492 | NM_146261    | chrX | 132395387 | 132396038 |
| X |   | 132212377 | 132220930 | NM_176971    | chrX | 132213790 | 132214483 |
| X |   | 132163140 | 132171699 | NM_011123    | chrX | 132169994 | 132170837 |
| X |   | 132123586 | 132132505 | NM_010297    | chrX | 132127867 | 132128544 |
| X |   | 132105971 | 132114470 | BC065397     | chrX | 132108009 | 132108981 |
| X |   | 132078371 | 132093973 | NM_019768    | chrX | 132088547 | 132090315 |
| X |   | 132082146 | 132090645 | NM_001033001 | chrX | 132088547 | 132090315 |
| X |   | 132078371 | 132093973 | NM_019768    | chrX | 132086944 | 132087858 |
| X |   | 132082146 | 132090645 | NM_001033001 | chrX | 132086944 | 132087858 |
| X |   | 132078371 | 132093973 | NM_019768    | chrX | 132083883 | 132084776 |
| X |   | 132082146 | 132090645 | NM_001033001 | chrX | 132083883 | 132084776 |
| X |   | 132078371 | 132093973 | NM_019768    | chrX | 132082091 | 132082686 |
| X |   | 132082146 | 132090645 | NM_001033001 | chrX | 132082091 | 132082686 |
| X |   | 132048396 | 132056928 | NM_146236    | chrX | 132054409 | 132055375 |
|   | 4 | 132002059 | 132010622 | NM_201368    | chr4 | 132010253 | 132010586 |



|   |   |           |           |              |      |           |           |
|---|---|-----------|-----------|--------------|------|-----------|-----------|
| X |   | 132006824 | 132015327 | NM_001029978 | chrX | 132009680 | 132010129 |
|   | 7 | 131990496 | 131999082 | NM_018867    | chr7 | 131993530 | 131994134 |
|   | 2 | 131948666 | 131957285 | NM_138651    | chr2 | 131954741 | 131955504 |
|   | 2 | 131936701 | 131950621 | NM_027478    | chr2 | 131944730 | 131945358 |
|   | 2 | 131790501 | 131799000 | AB038145     | chr2 | 131791474 | 131792088 |
| X |   | 131610691 | 131626368 | NM_009750    | chrX | 131618738 | 131619184 |
| X |   | 131516070 | 131524569 | NM_025703    | chrX | 131519620 | 131520430 |
| X |   | 131516070 | 131524569 | NM_025703    | chrX | 131517618 | 131518787 |
|   | 4 | 131481634 | 131490332 | NM_145393    | chr4 | 131483500 | 131484112 |
| X |   | 131479409 | 131488004 | NM_212457    | chrX | 131483082 | 131483597 |
| X |   | 131373731 | 131382251 | NM_029541    | chrX | 131379689 | 131380298 |
| X |   | 131373731 | 131382251 | NM_029541    | chrX | 131377271 | 131377870 |
| X |   | 131334188 | 131342694 | NM_029823    | chrX | 131338815 | 131339545 |
|   | 7 | 131328111 | 131354053 | NM_009774    | chr7 | 131337196 | 131338050 |
|   | 3 | 131289883 | 131298382 | NM_027816    | chr3 | 131297687 | 131298147 |
|   | 3 | 131289883 | 131298382 | NM_027816    | chr3 | 131295330 | 131295854 |
| X |   | 131229266 | 131237765 | NM_198161    | chrX | 131230477 | 131230965 |
|   | 4 | 131194589 | 131203088 | BC017137     | chr4 | 131201285 | 131201896 |
|   | 4 | 131163807 | 131172306 | NM_020587    | chr4 | 131171230 | 131171584 |
|   | 4 | 131163807 | 131172306 | NM_020587    | chr4 | 131169295 | 131169992 |
| X |   | 131139201 | 131149276 | BC058970     | chrX | 131142839 | 131144010 |
| X |   | 131139201 | 131149276 | BC058970     | chrX | 131139946 | 131140543 |
|   | 1 | 131095009 | 131103519 | NM_172485    | chr1 | 131102869 | 131103515 |
| X |   | 131083056 | 131094382 | NM_026081    | chrX | 131092709 | 131094337 |
| X |   | 131083056 | 131094382 | NM_026081    | chrX | 131091617 | 131092361 |
| X |   | 131083056 | 131094382 | NM_026081    | chrX | 131088743 | 131089340 |
| X |   | 131064538 | 131073039 | NM_030106    | chrX | 131071881 | 131072594 |
|   | 2 | 130863692 | 130884723 | NM_007682    | chr2 | 130881337 | 130881975 |
| X |   | 130713648 | 130722160 | NM_183320    | chrX | 130721471 | 130722123 |
|   | 3 | 130696074 | 130704573 | NM_025509    | chr3 | 130697937 | 130698547 |
|   | 2 | 130529052 | 130537551 | NM_029432    | chr2 | 130531259 | 130531868 |
| X |   | 130521479 | 130529978 | BC115763     | chrX | 130521110 | 130522205 |
|   | 1 | 130417285 | 130425845 | NM_009911    | chr1 | 130417293 | 130417763 |
|   | 6 | 130343903 | 130358667 | NM_016659    | chr6 | 130350428 | 130351035 |
|   | 7 | 130308173 | 130317109 | NM_013799    | chr7 | 130312617 | 130313031 |
| X |   | 130307762 | 130317118 | NM_031259    | chrX | 130310231 | 130311322 |
| X |   | 130307762 | 130317118 | NM_031259    | chrX | 130308938 | 130309584 |
|   | 6 | 130299015 | 130309319 | NM_010648    | chr6 | 130301224 | 130302120 |
|   | 6 | 130299015 | 130309319 | NM_010648    | chr6 | 130299744 | 130301131 |
|   | 6 | 130194832 | 130209508 | NM_014194    | chr6 | 130203544 | 130204920 |
|   | 6 | 130194832 | 130209508 | NM_014194    | chr6 | 130198647 | 130199463 |
|   | 2 | 130188914 | 130197413 | NM_008980    | chr2 | 130194885 | 130195882 |
|   | 6 | 130156230 | 130164805 | NM_010651    | chr6 | 130156674 | 130157598 |
| X |   | 130149374 | 130161585 | NM_026139    | chrX | 130153120 | 130154149 |
| X |   | 130149374 | 130161585 | NM_026139    | chrX | 130150610 | 130151431 |
|   | 6 | 130125806 | 130134306 | NM_001039117 | chr6 | 130127044 | 130128080 |
|   | 6 | 130125806 | 130134306 | NM_001039117 | chr6 | 130125804 | 130126866 |

|   |    |           |           |              |       |           |           |
|---|----|-----------|-----------|--------------|-------|-----------|-----------|
|   | 2  | 130109806 | 130118329 | NM_030559    | chr2  | 130112879 | 130113469 |
|   | 2  | 130113214 | 130122128 | NM_178762    | chr2  | 130112879 | 130113469 |
| X |    | 130090772 | 130103776 | NM_001007578 | chrX  | 130098949 | 130099992 |
| X |    | 130096961 | 130107428 | NM_027870    | chrX  | 130098949 | 130099992 |
|   | 2  | 130090737 | 130100462 | NM_025753    | chr2  | 130097954 | 130098558 |
| X |    | 130090772 | 130103776 | NM_001007578 | chrX  | 130093082 | 130093754 |
|   | 1  | 130065708 | 130074226 | NM_026390    | chr1  | 130072943 | 130073542 |
| X |    | 130058334 | 130066883 | NM_030066    | chrX  | 130063721 | 130064452 |
|   | 1  | 130057012 | 130065511 | BC062187     | chr1  | 130063562 | 130065020 |
|   | 4  | 130058613 | 130067221 | NM_011520    | chr4  | 130062132 | 130062977 |
|   | 6  | 130028550 | 130038951 | NM_053153    | chr6  | 130035352 | 130036185 |
|   | 6  | 130028550 | 130038951 | NM_053153    | chr6  | 130034338 | 130035269 |
|   | 6  | 130028550 | 130038951 | NM_053153    | chr6  | 130028568 | 130029737 |
| X |    | 129941609 | 129950135 | NM_019868    | chrX  | 129946494 | 129947939 |
| X |    | 129944794 | 129953309 | NM_013463    | chrX  | 129946494 | 129947939 |
| X |    | 129941609 | 129950135 | NM_019868    | chrX  | 129945503 | 129946022 |
| X |    | 129944794 | 129953309 | NM_013463    | chrX  | 129945503 | 129946022 |
| X |    | 129941609 | 129950135 | NM_019868    | chrX  | 129943511 | 129944099 |
| X |    | 129926039 | 129934548 | NM_019865    | chrX  | 129930074 | 129931097 |
| X |    | 129926915 | 129935466 | NM_013482    | chrX  | 129930074 | 129931097 |
| X |    | 129635575 | 129644172 | NM_026239    | chrX  | 129643172 | 129644083 |
|   | 6  | 129623778 | 129632382 | NM_010653    | chr6  | 129626336 | 129627114 |
|   | 6  | 129606482 | 129615021 | NM_021378    | chr6  | 129609339 | 129610068 |
|   | 4  | 129603860 | 129612422 | NM_026441    | chr4  | 129605724 | 129606406 |
|   | 1  | 129595710 | 129604209 | NM_028399    | chr1  | 129600676 | 129601293 |
|   | 6  | 129537586 | 129546478 | NM_153590    | chr6  | 129543960 | 129544555 |
| X |    | 129505779 | 129514278 | NM_183319    | chrX  | 129511954 | 129512558 |
|   | 1  | 129503068 | 129511567 | NM_028135    | chr1  | 129507166 | 129508086 |
|   | 4  | 129481468 | 129489967 | NM_173071    | chr4  | 129488650 | 129489277 |
|   | 10 | 129430577 | 129439076 | NM_146776    | chr10 | 129433249 | 129433860 |
|   | 7  | 129377077 | 129385584 | NM_172255    | chr7  | 129382735 | 129383362 |
| X |    | 129325634 | 129334162 | NM_013757    | chrX  | 129328110 | 129329013 |
| X |    | 129325634 | 129334162 | NM_013757    | chrX  | 129326786 | 129327396 |
|   | 4  | 129316561 | 129325060 | BC087551     | chr4  | 129323966 | 129324896 |
| X |    | 129249046 | 129259442 | NM_026838    | chrX  | 129257238 | 129257961 |
| X |    | 129249046 | 129259442 | NM_026838    | chrX  | 129254674 | 129255508 |
| X |    | 129191358 | 129199984 | NM_022322    | chrX  | 129198052 | 129199020 |
|   | 4  | 128990542 | 128999074 | NM_080442    | chr4  | 128997982 | 128998954 |
|   | 10 | 128897762 | 128906261 | NM_146933    | chr10 | 128902323 | 128903051 |
|   | 10 | 128897762 | 128906261 | NM_146933    | chr10 | 128899509 | 128900224 |
|   | 8  | 128875260 | 128884016 | NM_008430    | chr8  | 128881081 | 128881698 |
|   | 2  | 128786455 | 128795006 | NM_009086    | chr2  | 128793972 | 128794641 |
|   | 4  | 128618563 | 128629607 | NM_010471    | chr4  | 128623457 | 128624294 |
|   | 4  | 128618563 | 128629607 | NM_010471    | chr4  | 128622401 | 128623264 |
|   | 4  | 128601905 | 128610419 | NM_025452    | chr4  | 128609659 | 128610380 |
|   | 6  | 128506516 | 128515015 | BC048546     | chr6  | 128508758 | 128509358 |
|   | 10 | 128361323 | 128369937 | NM_027853    | chr10 | 128361569 | 128362242 |

|    |           |           |              |       |           |           |
|----|-----------|-----------|--------------|-------|-----------|-----------|
| 7  | 128308764 | 128317419 | NM_013863    | chr7  | 128310941 | 128311457 |
| 10 | 128218868 | 128227367 | NM_025364    | chr10 | 128224887 | 128225503 |
| 10 | 128222044 | 128230555 | NM_024180    | chr10 | 128224887 | 128225503 |
| 10 | 128218868 | 128227367 | NM_025364    | chr10 | 128219587 | 128220267 |
| 10 | 128073053 | 128085598 | NM_173733    | chr10 | 128079429 | 128080037 |
| 10 | 127966338 | 127974897 | NM_011119    | chr10 | 127967853 | 127968479 |
| 5  | 127904096 | 127912601 | NM_133895    | chr5  | 127905228 | 127905832 |
| 7  | 127752627 | 127763208 | NM_139149    | chr7  | 127759588 | 127760109 |
| 10 | 127711145 | 127728135 | NM_019953    | chr10 | 127720122 | 127720854 |
| 10 | 127622787 | 127659792 | NM_011589    | chr10 | 127654918 | 127655718 |
| 8  | 127602229 | 127610748 | NM_026855    | chr8  | 127606243 | 127607262 |
| 8  | 127605555 | 127614054 | BC079851     | chr8  | 127606243 | 127607262 |
| 8  | 127602229 | 127610748 | NM_026855    | chr8  | 127603786 | 127604709 |
| 10 | 127576889 | 127589246 | NM_001039080 | chr10 | 127579247 | 127579865 |
| 8  | 127572216 | 127580715 | BC017545     | chr8  | 127576546 | 127577276 |
| 7  | 127210130 | 127219175 | NM_026999    | chr7  | 127217515 | 127218246 |
| 10 | 127198103 | 127206632 | NM_009040    | chr10 | 127199206 | 127199813 |
| 6  | 127032521 | 127041125 | NM_022657    | chr6  | 127038010 | 127038626 |
| 7  | 126876584 | 126885813 | NM_178901    | chr7  | 126885257 | 126885705 |
| 6  | 126812245 | 126820744 | NM_025358    | chr6  | 126812696 | 126813225 |
| 6  | 126812792 | 126824172 | NM_009650    | chr6  | 126812696 | 126813225 |
| 10 | 126712089 | 126720627 | NM_001003913 | chr10 | 126714619 | 126715093 |
| 10 | 126712089 | 126720627 | NM_001003913 | chr10 | 126711708 | 126712394 |
| 10 | 126687757 | 126696258 | NM_007837    | chr10 | 126687739 | 126688346 |
| 10 | 126611994 | 126620506 | NM_054097    | chr10 | 126613115 | 126613746 |
| 2  | 126565059 | 126573671 | NM_021450    | chr2  | 126566834 | 126567487 |
| 7  | 126465006 | 126473505 | NM_133670    | chr7  | 126467491 | 126468108 |
| 8  | 126398943 | 126407481 | NM_028146    | chr8  | 126399737 | 126400346 |
| 10 | 126392560 | 126408810 | NM_146012    | chr10 | 126396653 | 126397275 |
| 3  | 126349874 | 126359153 | NM_173451    | chr3  | 126357034 | 126357678 |
| 7  | 126203485 | 126211984 | NM_009844    | chr7  | 126207683 | 126208288 |
| 6  | 126128041 | 126136540 | NM_008742    | chr6  | 126133707 | 126134330 |
| 8  | 126096329 | 126104832 | NM_145606    | chr8  | 126098024 | 126098610 |
| 8  | 125982512 | 125991021 | NM_016738    | chr8  | 125983461 | 125984135 |
| 7  | 125635526 | 125644025 | BC030902     | chr7  | 125640577 | 125641211 |
| 4  | 125593028 | 125608801 | NM_028800    | chr4  | 125606408 | 125607159 |
| 7  | 125555751 | 125564250 | BC042743     | chr7  | 125560200 | 125560808 |
| 6  | 125506595 | 125521258 | NM_011708    | chr6  | 125518352 | 125519045 |
| 8  | 125506326 | 125520597 | NM_001007462 | chr8  | 125513206 | 125513898 |
| 6  | 125457813 | 125466379 | NM_007657    | chr6  | 125458739 | 125459765 |
| 3  | 125423702 | 125432201 | NM_022565    | chr3  | 125429849 | 125430449 |
| 3  | 125423702 | 125432201 | NM_022565    | chr3  | 125425271 | 125426041 |
| 6  | 125089213 | 125113919 | NM_178787    | chr6  | 125097186 | 125098012 |
| 6  | 125009308 | 125018093 | NM_016845    | chr6  | 125010364 | 125011005 |
| 4  | 125000383 | 125008988 | NM_008049    | chr4  | 125005517 | 125006136 |
| 5  | 124999285 | 125007784 | AF388674     | chr5  | 124999284 | 124999813 |
| 6  | 124599205 | 124608563 | NM_173864    | chr6  | 124605187 | 124605888 |

|   |    |           |           |              |       |           |           |
|---|----|-----------|-----------|--------------|-------|-----------|-----------|
|   | 6  | 124599205 | 124608563 | NM_173864    | chr6  | 124600672 | 124601298 |
|   | 4  | 124526342 | 124534841 | NM_145552    | chr4  | 124532021 | 124532836 |
|   | 8  | 124425432 | 124441966 | NM_029597    | chr8  | 124428186 | 124428939 |
|   | 4  | 124347079 | 124355586 | NM_153566    | chr4  | 124353197 | 124353916 |
|   | 6  | 124320189 | 124328688 | BC120816     | chr6  | 124321303 | 124322098 |
|   | 4  | 124238176 | 124246681 | NM_008385    | chr4  | 124239240 | 124239844 |
|   | 8  | 123996148 | 124005059 | NM_013519    | chr8  | 124002636 | 124003269 |
|   | 9  | 123964372 | 123975648 | NM_009917    | chr9  | 123973427 | 123974060 |
|   | 8  | 123964451 | 123975442 | NM_010426    | chr8  | 123966398 | 123967183 |
|   | 5  | 123740219 | 123748719 | BC117082     | chr5  | 123741246 | 123742006 |
|   | 9  | 123697768 | 123706267 | NM_148925    | chr9  | 123703551 | 123704164 |
|   | 4  | 123401135 | 123409853 | NM_019660    | chr4  | 123404116 | 123404846 |
|   | 5  | 123390537 | 123399246 | NM_175092    | chr5  | 123393272 | 123393938 |
|   | 9  | 122864024 | 122872523 | NM_025339    | chr9  | 122871786 | 122872400 |
| X |    | 122855888 | 122864428 | NM_207250    | chrX  | 122862869 | 122864290 |
|   | 9  | 122765776 | 122774295 | NM_009544    | chr9  | 122768917 | 122769534 |
|   | 9  | 122708363 | 122720649 | NM_173364    | chr9  | 122709918 | 122711310 |
|   | 4  | 122612562 | 122621066 | NM_181859    | chr4  | 122613546 | 122614434 |
|   | 5  | 122609030 | 122617540 | NM_019780    | chr5  | 122610116 | 122610717 |
|   | 4  | 122512900 | 122521430 | NM_025873    | chr4  | 122519758 | 122520536 |
|   | 4  | 122372262 | 122380761 | NM_007598    | chr4  | 122378779 | 122379363 |
|   | 4  | 122352107 | 122360606 | BC099945     | chr4  | 122356147 | 122356931 |
|   | 2  | 122316127 | 122331827 | NM_001004174 | chr2  | 122321249 | 122321867 |
| X |    | 122280797 | 122289460 | NM_177705    | chrX  | 122287477 | 122287920 |
| X |    | 122280797 | 122289460 | NM_177705    | chrX  | 122285784 | 122286814 |
| X |    | 122280797 | 122289460 | NM_177705    | chrX  | 122283396 | 122285006 |
|   | 10 | 122075865 | 122084578 | NM_176919    | chr10 | 122083831 | 122084492 |
|   | 9  | 121974600 | 121983099 | NM_133741    | chr9  | 121982089 | 121982674 |
|   | 5  | 121779813 | 121788312 | NM_172126    | chr5  | 121786300 | 121786936 |
|   | 11 | 121640351 | 121648892 | AB235902     | chr11 | 121646375 | 121647470 |
|   | 11 | 121640351 | 121648892 | AB235902     | chr11 | 121645659 | 121646355 |
|   | 11 | 121512502 | 121521061 | NM_144797    | chr11 | 121519032 | 121519806 |
|   | 5  | 121391188 | 121399687 | BC003980     | chr5  | 121395220 | 121395875 |
|   | 5  | 121391188 | 121399687 | BC003980     | chr5  | 121391303 | 121392154 |
|   | 11 | 121332893 | 121341392 | NM_178763    | chr11 | 121332887 | 121333500 |
|   | 2  | 121274926 | 121283425 | BC057549     | chr2  | 121282401 | 121283000 |
|   | 14 | 121236262 | 121244822 | NM_080556    | chr14 | 121241491 | 121242213 |
|   | 9  | 121209666 | 121218213 | BC058971     | chr9  | 121217480 | 121218069 |
|   | 11 | 121201836 | 121210335 | NM_139147    | chr11 | 121207930 | 121208655 |
|   | 6  | 121143286 | 121152033 | NM_028730    | chr6  | 121148385 | 121148981 |
|   | 5  | 121066900 | 121079131 | NM_033541    | chr5  | 121068128 | 121068745 |
|   | 5  | 121067255 | 121075797 | NM_011853    | chr5  | 121068128 | 121068745 |
|   | 11 | 120876823 | 120885659 | NM_026907    | chr11 | 120883931 | 120884681 |
|   | 1  | 120878582 | 120887106 | BC082604     | chr1  | 120881634 | 120882273 |
|   | 11 | 120852998 | 120861508 | NM_009854    | chr11 | 120856601 | 120857193 |
|   | 2  | 120825877 | 120836081 | NM_029475    | chr2  | 120830165 | 120830772 |
|   | 9  | 120801914 | 120810413 | BC006739     | chr9  | 120806509 | 120807510 |

|    |           |           |              |       |           |           |
|----|-----------|-----------|--------------|-------|-----------|-----------|
| 14 | 120725125 | 120733624 | BC057692     | chr14 | 120726973 | 120727573 |
| 14 | 120714116 | 120722615 | BC009134     | chr14 | 120721029 | 120721621 |
| 11 | 120637655 | 120646637 | NM_007988    | chr11 | 120645392 | 120645995 |
| 11 | 120594365 | 120603104 | NM_145370    | chr11 | 120600186 | 120600923 |
| 11 | 120597793 | 120606294 | NM_009053    | chr11 | 120600186 | 120600923 |
| 10 | 120431064 | 120439789 | NM_011915    | chr10 | 120433471 | 120433916 |
| 4  | 120420134 | 120428640 | NM_028457    | chr4  | 120427519 | 120428239 |
| 7  | 120420338 | 120428877 | NM_025899    | chr7  | 120421089 | 120421505 |
| 14 | 120378202 | 120386701 | BC096543     | chr14 | 120380651 | 120381510 |
| 11 | 120294746 | 120310508 | NM_013770    | chr11 | 120300871 | 120301559 |
| 2  | 120269709 | 120278208 | AB000822     | chr2  | 120276438 | 120277433 |
| 11 | 120188018 | 120200836 | NM_027980    | chr11 | 120198810 | 120199463 |
| 2  | 120162350 | 120170885 | BC090661     | chr2  | 120167372 | 120167988 |
| 6  | 120000899 | 120010226 | NM_198703    | chr6  | 120002337 | 120003018 |
| 5  | 119925286 | 119933978 | NM_011535    | chr5  | 119932076 | 119932680 |
| 9  | 119914440 | 119922981 | NM_009987    | chr9  | 119921666 | 119922254 |
| 11 | 119900409 | 119908908 | NM_009734    | chr11 | 119902763 | 119903354 |
| 12 | 119699034 | 119707564 | BC085086     | chr12 | 119705666 | 119706247 |
| 9  | 119670059 | 119680154 | NM_011887    | chr9  | 119671697 | 119672333 |
| 7  | 119582610 | 119591109 | NM_027698    | chr7  | 119583661 | 119584256 |
| 7  | 119311414 | 119319989 | BC095985     | chr7  | 119315852 | 119316515 |
| 11 | 119301790 | 119310289 | NM_177394    | chr11 | 119303706 | 119304333 |
| 11 | 119290891 | 119299390 | NM_001040005 | chr11 | 119293399 | 119294244 |
| 9  | 119186174 | 119194738 | NM_010851    | chr9  | 119189091 | 119189765 |
| 4  | 119129647 | 119138169 | NM_008190    | chr4  | 119133087 | 119133705 |
| 11 | 119113622 | 119122133 | NM_138669    | chr11 | 119120238 | 119120836 |
| 9  | 119077774 | 119086390 | NM_175420    | chr9  | 119079653 | 119080382 |
| 9  | 118895476 | 118914645 | NM_011700    | chr9  | 118903543 | 118904149 |
| 11 | 118798278 | 118806777 | NM_001030291 | chr11 | 118805834 | 118806428 |
| 4  | 118789822 | 118798445 | NM_011732    | chr4  | 118796852 | 118797543 |
| 9  | 118769174 | 118778048 | NM_133710    | chr9  | 118773163 | 118774163 |
| 2  | 118732591 | 118741090 | BC080815     | chr2  | 118740557 | 118741065 |
| 2  | 118586894 | 118595555 | NM_001045523 | chr2  | 118592738 | 118593434 |
| X  | 118511727 | 118520329 | NM_138742    | chrX  | 118512540 | 118513573 |
| 7  | 118373336 | 118381896 | NM_172476    | chr7  | 118375354 | 118375928 |
| 11 | 118229385 | 118241176 | NM_029502    | chr11 | 118238789 | 118239471 |
| 11 | 118238589 | 118252442 | NM_019959    | chr11 | 118238789 | 118239471 |
| 2  | 118168603 | 118177137 | NM_009273    | chr2  | 118175054 | 118175646 |
| 11 | 118156091 | 118164624 | NM_021440    | chr11 | 118158553 | 118159351 |
| 13 | 118012563 | 118021062 | BC021315     | chr13 | 118015694 | 118016292 |
| 4  | 117932664 | 117941274 | NM_023223    | chr4  | 117934097 | 117934799 |
| 7  | 117918198 | 117926760 | NM_019419    | chr7  | 117926143 | 117926724 |
| 11 | 117636014 | 117644513 | NM_027827    | chr11 | 117638735 | 117639291 |
| 11 | 117571152 | 117579651 | BC018495     | chr11 | 117573825 | 117574777 |
| 11 | 117571152 | 117579651 | BC018495     | chr11 | 117571181 | 117572158 |
| 4  | 117423317 | 117433695 | NM_009711    | chr4  | 117427986 | 117428627 |
| 4  | 117224754 | 117233253 | AF178961     | chr4  | 117226041 | 117226652 |

|   |    |           |           |              |       |           |           |
|---|----|-----------|-----------|--------------|-------|-----------|-----------|
|   | 4  | 116992348 | 117000847 | NM_025739    | chr4  | 116993679 | 116994443 |
|   | 12 | 116782517 | 116791016 | BC059230     | chr12 | 116788166 | 116788756 |
|   | 11 | 116666663 | 116675181 | NM_011358    | chr11 | 116674562 | 116675159 |
|   | 4  | 116651565 | 116660064 | NM_009098    | chr4  | 116652187 | 116653186 |
|   | 4  | 116487280 | 116501285 | NM_175244    | chr4  | 116497912 | 116498659 |
|   | 4  | 116489131 | 116498307 | NM_009478    | chr4  | 116497912 | 116498659 |
|   | 6  | 116375912 | 116384411 | BC049768     | chr6  | 116378659 | 116379285 |
|   | 11 | 116354729 | 116363228 | BC055067     | chr11 | 116359673 | 116360270 |
|   | 10 | 116351991 | 116360490 | NM_001003950 | chr10 | 116358812 | 116360357 |
|   | 6  | 116223880 | 116232379 | BC048508     | chr6  | 116227250 | 116227873 |
|   | 5  | 116223024 | 116231524 | BC023775     | chr5  | 116223431 | 116224138 |
|   | 5  | 116181085 | 116189584 | U39904       | chr5  | 116186139 | 116186736 |
|   | 4  | 116084954 | 116097161 | NM_001037916 | chr4  | 116090633 | 116091235 |
|   | 4  | 116049659 | 116058158 | NM_029868    | chr4  | 116053762 | 116054543 |
|   | 4  | 116051360 | 116059868 | NM_177670    | chr4  | 116053762 | 116054543 |
| X |    | 116038140 | 116047279 | NM_053114    | chrX  | 116042291 | 116043489 |
|   | 10 | 115983107 | 115991621 | NM_001037846 | chr10 | 115983518 | 115984372 |
|   | 11 | 115962541 | 115971040 | BC055689     | chr11 | 115967254 | 115967855 |
|   | 6  | 115958084 | 115966583 | NM_026376    | chr6  | 115960742 | 115961787 |
|   | 6  | 115891545 | 115913057 | NM_145383    | chr6  | 115893414 | 115894176 |
|   | 11 | 115817345 | 115825844 | BC080751     | chr11 | 115823656 | 115824341 |
|   | 6  | 115813147 | 115821730 | NM_031177    | chr6  | 115818435 | 115819185 |
|   | 6  | 115816443 | 115825340 | NM_010774    | chr6  | 115818435 | 115819185 |
|   | 7  | 115783736 | 115792235 | NM_011445    | chr7  | 115788675 | 115789260 |
|   | 10 | 115515490 | 115523989 | NM_001033821 | chr10 | 115517184 | 115517946 |
|   | 11 | 115327950 | 115336477 | NM_008258    | chr11 | 115329699 | 115330303 |
|   | 2  | 115267174 | 115275716 | NM_207264    | chr2  | 115273675 | 115274286 |
|   | 13 | 115269971 | 115278470 | NM_177004    | chr13 | 115269970 | 115270782 |
|   | 11 | 115117253 | 115125752 | NM_172801    | chr11 | 115123083 | 115123711 |
|   | 11 | 115111105 | 115119604 | NM_178035    | chr11 | 115112545 | 115113192 |
|   | 3  | 114890137 | 114898925 | NM_153458    | chr3  | 114891541 | 114892193 |
|   | 8  | 114876422 | 114884975 | NM_013925    | chr8  | 114882790 | 114883397 |
|   | 10 | 114783069 | 114791568 | NM_001033261 | chr10 | 114790951 | 114791583 |
|   | 10 | 114785954 | 114794545 | NM_025780    | chr10 | 114790951 | 114791583 |
|   | 10 | 114783069 | 114791568 | NM_001033261 | chr10 | 114789703 | 114790313 |
|   | 10 | 114785954 | 114794545 | NM_025780    | chr10 | 114789703 | 114790313 |
| X |    | 114595174 | 114603673 | NM_153109    | chrX  | 114596569 | 114597969 |
|   | 7  | 114577211 | 114585710 | NM_173767    | chr7  | 114581279 | 114581900 |
|   | 4  | 114548358 | 114559958 | NM_011527    | chr4  | 114555964 | 114556898 |
| X |    | 114538179 | 114546761 | BC111833     | chrX  | 114545778 | 114546413 |
| X |    | 114538179 | 114546761 | BC111833     | chrX  | 114540333 | 114541557 |
|   | 7  | 114494837 | 114503368 | NM_016980    | chr7  | 114496307 | 114497060 |
|   | 9  | 114443953 | 114452452 | BC047204     | chr9  | 114444584 | 114445365 |
|   | 5  | 114420517 | 114429016 | NM_133904    | chr5  | 114426472 | 114427195 |
|   | 5  | 114058852 | 114067365 | NM_146162    | chr5  | 114061555 | 114062004 |
|   | 5  | 114022099 | 114036320 | NM_025526    | chr5  | 114034258 | 114035093 |
|   | 5  | 114030149 | 114038648 | NM_016926    | chr5  | 114034258 | 114035093 |

|   |    |           |                        |       |           |           |
|---|----|-----------|------------------------|-------|-----------|-----------|
|   | 6  | 113943861 | 113952360 AF053471     | chr6  | 113945749 | 113946416 |
|   | 8  | 113937014 | 113945513 NM_028274    | chr8  | 113940716 | 113941305 |
|   | 12 | 113931319 | 113939852 NM_001009545 | chr12 | 113933589 | 113934478 |
|   | 12 | 113931319 | 113939852 NM_001009545 | chr12 | 113931854 | 113932446 |
|   | 8  | 113927642 | 113936141 BC026611     | chr8  | 113929160 | 113929811 |
|   | 9  | 113872936 | 113881438 NM_178624    | chr9  | 113880515 | 113881080 |
|   | 13 | 113770680 | 113779179 NM_010029    | chr13 | 113773434 | 113774066 |
|   | 2  | 113702561 | 113711060 NM_010290    | chr2  | 113705530 | 113706187 |
|   | 5  | 113548523 | 113557022 NM_172718    | chr5  | 113551797 | 113552512 |
|   | 12 | 113502507 | 113512512 BC059076     | chr12 | 113510010 | 113510719 |
|   | 6  | 113418261 | 113439850 NM_145826    | chr6  | 113433874 | 113434489 |
|   | 6  | 113418261 | 113439850 NM_145826    | chr6  | 113430412 | 113431005 |
|   | 12 | 113418371 | 113426870 NM_201646    | chr12 | 113422606 | 113423123 |
|   | 6  | 113349298 | 113366034 NM_133923    | chr6  | 113351080 | 113351712 |
|   | 12 | 113301188 | 113314760 NM_019925    | chr12 | 113305212 | 113306053 |
|   | 12 | 113267379 | 113283231 NM_028023    | chr12 | 113267518 | 113268174 |
|   | 7  | 113059813 | 113068312 BC025973     | chr7  | 113063521 | 113064239 |
|   | 6  | 112909774 | 112918691 AF496547     | chr6  | 112912513 | 112913170 |
|   | 11 | 112592314 | 112600871 NM_011448    | chr11 | 112599412 | 112600013 |
|   | 8  | 112588788 | 112597716 NM_029468    | chr8  | 112594269 | 112595059 |
|   | 5  | 112577398 | 112587754 NM_138646    | chr5  | 112579854 | 112580442 |
|   | 11 | 112524932 | 112533446 BC006965     | chr11 | 112528043 | 112528876 |
|   | 5  | 112511010 | 112519528 NM_009419    | chr5  | 112513266 | 112513858 |
|   | 8  | 112449021 | 112457635 NM_175646    | chr8  | 112453437 | 112454048 |
|   | 8  | 112452231 | 112460730 NM_178380    | chr8  | 112453437 | 112454048 |
|   | 7  | 111947089 | 111956238 NM_015814    | chr7  | 111948782 | 111949450 |
|   | 12 | 111931105 | 111939604 NM_001033248 | chr12 | 111934196 | 111934789 |
|   | 12 | 111712906 | 111721418 NM_033603    | chr12 | 111719106 | 111719864 |
|   | 2  | 111672193 | 111680692 NM_146401    | chr2  | 111673907 | 111674733 |
|   | 2  | 111613064 | 111621563 NM_146402    | chr2  | 111618780 | 111619565 |
|   | 8  | 111597773 | 111606272 NM_007496    | chr8  | 111604367 | 111605018 |
|   | 13 | 111472895 | 111484050 NM_177713    | chr13 | 111479658 | 111480297 |
|   | 2  | 111163430 | 111171929 NM_207236    | chr2  | 111167707 | 111168449 |
|   | 12 | 111141590 | 111150202 NM_010480    | chr12 | 111148956 | 111149563 |
|   | 2  | 111027891 | 111038630 NM_026248    | chr2  | 111032889 | 111033552 |
|   | 2  | 111027891 | 111038630 NM_026248    | chr2  | 111029702 | 111030295 |
| X |    | 111015956 | 111027025 NM_207241    | chrX  | 111025108 | 111025555 |
|   | 5  | 110891172 | 110899684 NM_153570    | chr5  | 110896651 | 110897555 |
|   | 12 | 110889114 | 110898278 NM_001037934 | chr12 | 110896554 | 110897265 |
|   | 9  | 110683322 | 110705282 NM_146227    | chr9  | 110689580 | 110690539 |
|   | 9  | 110602494 | 110610996 NM_010859    | chr9  | 110609090 | 110609482 |
| X |    | 110585464 | 110593963 NM_172781    | chrX  | 110587602 | 110588204 |
| X |    | 110585464 | 110593963 NM_172781    | chrX  | 110585339 | 110585952 |
|   | 5  | 110568162 | 110576661 BC002275     | chr5  | 110570126 | 110571055 |
|   | 10 | 110562912 | 110571411 NM_175489    | chr10 | 110568930 | 110569521 |
|   | 8  | 110475060 | 110483611 NM_010817    | chr8  | 110475174 | 110475786 |
|   | 5  | 110370162 | 110378677 NM_172717    | chr5  | 110373701 | 110374302 |

|   |    |           |           |              |       |           |           |
|---|----|-----------|-----------|--------------|-------|-----------|-----------|
|   | 10 | 110318286 | 110326811 | NM_007792    | chr10 | 110321481 | 110322210 |
|   | 2  | 110104003 | 110112582 | NM_130452    | chr2  | 110111835 | 110112543 |
|   | 12 | 109987425 | 109995924 | BC048191     | chr12 | 109988816 | 109989517 |
|   | 12 | 109987425 | 109995924 | BC048191     | chr12 | 109988008 | 109988765 |
|   | 8  | 109940006 | 109948518 | NM_025391    | chr8  | 109945376 | 109945991 |
|   | 8  | 109943303 | 109951813 | NM_139229    | chr8  | 109945376 | 109945991 |
|   | 8  | 109940006 | 109948518 | NM_025391    | chr8  | 109941949 | 109942619 |
|   | 8  | 109776763 | 109792474 | NM_011574    | chr8  | 109789581 | 109790167 |
|   | 4  | 109782014 | 109791443 | NM_010488    | chr4  | 109786565 | 109787158 |
|   | 9  | 109668033 | 109676550 | NM_183136    | chr9  | 109671567 | 109671962 |
|   | 9  | 109668033 | 109676550 | NM_183136    | chr9  | 109670267 | 109670875 |
|   | 7  | 109540925 | 109549440 | NM_020050    | chr7  | 109542687 | 109543363 |
|   | 11 | 109535847 | 109544346 | NM_153782    | chr11 | 109537409 | 109538019 |
|   | 4  | 109469957 | 109478484 | NM_172296    | chr4  | 109474178 | 109474925 |
| X |    | 109409200 | 109417710 | NM_033605    | chrX  | 109416770 | 109417443 |
| X |    | 109409200 | 109417710 | NM_033605    | chrX  | 109415639 | 109416629 |
| X |    | 109409200 | 109417710 | NM_033605    | chrX  | 109413226 | 109413885 |
|   | 11 | 109299970 | 109308469 | NM_028710    | chr11 | 109307342 | 109308044 |
|   | 8  | 109094159 | 109104154 | NM_145404    | chr8  | 109100075 | 109100692 |
|   | 8  | 109097548 | 109106052 | NM_001007567 | chr8  | 109100075 | 109100692 |
|   | 3  | 109015372 | 109023926 | NM_177091    | chr3  | 109016731 | 109017339 |
|   | 4  | 108899044 | 108907590 | NM_153392    | chr4  | 108901007 | 108901776 |
|   | 8  | 108820477 | 108838514 | NM_008490    | chr8  | 108821436 | 108822529 |
| X |    | 108813096 | 108821595 | NM_181579    | chrX  | 108814352 | 108814951 |
|   | 7  | 108796057 | 108811218 | NM_021885    | chr7  | 108797959 | 108798743 |
|   | 9  | 108705260 | 108714460 | NM_134420    | chr9  | 108708000 | 108708957 |
|   | 5  | 108622675 | 108631174 | NM_008806    | chr5  | 108624356 | 108625237 |
| X |    | 108606218 | 108614717 | NM_026333    | chrX  | 108610466 | 108611000 |
|   | 3  | 108570705 | 108585711 | NM_011319    | chr3  | 108578624 | 108579267 |
|   | 8  | 108546881 | 108555380 | BC046398     | chr8  | 108549429 | 108550042 |
|   | 3  | 108541051 | 108549550 | NM_017392    | chr3  | 108542188 | 108543309 |
| X |    | 108422302 | 108430851 | NM_026565    | chrX  | 108427443 | 108428338 |
|   | 7  | 108406991 | 108423670 | NM_146743    | chr7  | 108420245 | 108420887 |
|   | 8  | 108357997 | 108366518 | NM_026481    | chr8  | 108365708 | 108366301 |
|   | 9  | 108332048 | 108340547 | NM_008483    | chr9  | 108337588 | 108338655 |
|   | 4  | 108329017 | 108337516 | NM_027453    | chr4  | 108335132 | 108335733 |
|   | 7  | 108312645 | 108321144 | NM_146739    | chr7  | 108318695 | 108319600 |
|   | 3  | 108308391 | 108317223 | NM_146137    | chr3  | 108315251 | 108316154 |
|   | 5  | 108300044 | 108308544 | NM_013827    | chr5  | 108306134 | 108307127 |
|   | 7  | 108207750 | 108216249 | NM_146738    | chr7  | 108210288 | 108210810 |
|   | 8  | 108175680 | 108191227 | NM_028888    | chr8  | 108189355 | 108189918 |
|   | 8  | 108180792 | 108197237 | NM_172760    | chr8  | 108189355 | 108189918 |
|   | 6  | 108172895 | 108181394 | NM_010585    | chr6  | 108174963 | 108175692 |
|   | 8  | 108141448 | 108150280 | NM_178879    | chr8  | 108142715 | 108143300 |
|   | 9  | 108119338 | 108128025 | NM_010017    | chr9  | 108122624 | 108123147 |
|   | 6  | 108024823 | 108033331 | BC045208     | chr6  | 108030435 | 108031073 |
|   | 8  | 107966892 | 107975398 | NM_144511    | chr8  | 107969785 | 107970484 |



|   |    |           |           |              |       |           |           |
|---|----|-----------|-----------|--------------|-------|-----------|-----------|
|   | 3  | 107821934 | 107830565 | NM_145542    | chr3  | 107822375 | 107823109 |
| X |    | 107577490 | 107585989 | BC054113     | chrX  | 107584127 | 107584732 |
|   | 4  | 107501949 | 107510448 | BC054455     | chr4  | 107502025 | 107502706 |
|   | 1  | 107485460 | 107493973 | NM_173187    | chr1  | 107492037 | 107492744 |
|   | 1  | 107488691 | 107497209 | NM_013784    | chr1  | 107492037 | 107492744 |
|   | 3  | 107401084 | 107409583 | BC028547     | chr3  | 107401176 | 107401985 |
| X |    | 107011184 | 107019683 | NM_008901    | chrX  | 107018621 | 107019546 |
| X |    | 107011184 | 107019683 | NM_008901    | chrX  | 107015300 | 107015972 |
| X |    | 107011184 | 107019683 | NM_008901    | chrX  | 107013204 | 107014199 |
|   | 7  | 106994622 | 107003121 | NM_029660    | chr7  | 107002169 | 107002800 |
|   | 10 | 106887745 | 106896244 | NM_008656    | chr10 | 106888741 | 106889736 |
|   | 11 | 106886324 | 106894823 | BC060715     | chr11 | 106887635 | 106888667 |
|   | 4  | 106745830 | 106754365 | NM_028394    | chr4  | 106751233 | 106752056 |
|   | 4  | 106748870 | 106757465 | NM_029985    | chr4  | 106751233 | 106752056 |
|   | 9  | 106737469 | 106756047 | NM_029103    | chr9  | 106749139 | 106749997 |
|   | 5  | 106695687 | 106704752 | NM_001005477 | chr5  | 106702027 | 106702606 |
|   | 10 | 106669941 | 106678468 | NM_001039354 | chr10 | 106677898 | 106678505 |
|   | 10 | 106669941 | 106678468 | NM_001039354 | chr10 | 106671418 | 106672367 |
|   | 7  | 106597610 | 106606109 | NM_146600    | chr7  | 106601206 | 106602034 |
|   | 7  | 106601793 | 106611164 | NM_028910    | chr7  | 106601206 | 106602034 |
|   | 12 | 106405278 | 106413865 | NM_011705    | chr12 | 106409031 | 106409619 |
|   | 12 | 106405278 | 106413865 | NM_011705    | chr12 | 106407666 | 106408513 |
|   | 11 | 106301387 | 106309886 | NM_023913    | chr11 | 106302848 | 106303458 |
|   | 5  | 106110870 | 106119403 | NM_018759    | chr5  | 106117302 | 106118262 |
|   | 9  | 106074699 | 106083265 | NM_031178    | chr9  | 106081593 | 106082196 |
|   | 9  | 106013398 | 106022239 | NM_174846    | chr9  | 106013397 | 106014343 |
|   | 3  | 105992914 | 106001462 | NM_027025    | chr3  | 105998632 | 105999346 |
|   | 4  | 105932139 | 105940638 | BC030081     | chr4  | 105934930 | 105935545 |
|   | 3  | 105826733 | 105835232 | NM_175398    | chr3  | 105830537 | 105831226 |
|   | 5  | 105650077 | 105658576 | NM_001033550 | chr5  | 105652783 | 105653379 |
|   | 12 | 105621257 | 105629764 | NM_009337    | chr12 | 105622185 | 105622790 |
|   | 12 | 105585910 | 105594594 | NM_013772    | chr12 | 105592542 | 105593183 |
|   | 12 | 105571408 | 105579910 | NM_013776    | chr12 | 105571578 | 105572336 |
|   | 12 | 105542083 | 105550598 | NM_013775    | chr12 | 105547252 | 105548045 |
|   | 7  | 105504777 | 105522297 | NM_018880    | chr7  | 105510577 | 105511164 |
|   | 7  | 105508269 | 105516860 | NM_019502    | chr7  | 105510577 | 105511164 |
|   | 2  | 105463735 | 105488220 | NM_013627    | chr2  | 105485524 | 105486320 |
|   | 12 | 105408360 | 105416859 | NM_172500    | chr12 | 105411805 | 105412878 |
|   | 13 | 105224172 | 105232671 | NM_144838    | chr13 | 105232362 | 105233068 |
|   | 13 | 105227458 | 105235957 | NM_029447    | chr13 | 105232362 | 105233068 |
| X |    | 105213541 | 105222078 | NM_016710    | chrX  | 105220510 | 105220992 |
| X |    | 105213541 | 105222078 | NM_016710    | chrX  | 105214362 | 105217247 |
|   | 3  | 105164547 | 105173046 | BC003236     | chr3  | 105170116 | 105170735 |
|   | 11 | 104988897 | 105002829 | NM_011903    | chr11 | 104996307 | 104997088 |
|   | 12 | 104871787 | 104880286 | NM_010351    | chr12 | 104879540 | 104880146 |
|   | 12 | 104801779 | 104810308 | NM_009252    | chr12 | 104809611 | 104810282 |
|   | 3  | 104761729 | 104770248 | NM_009196    | chr3  | 104768270 | 104769065 |

|   |    |           |           |              |       |           |           |
|---|----|-----------|-----------|--------------|-------|-----------|-----------|
|   | 2  | 104647936 | 104656606 | NM_178695    | chr2  | 104653632 | 104654243 |
| X |    | 104642984 | 104651483 | BC099952     | chrX  | 104647875 | 104650242 |
|   | 3  | 104638355 | 104646917 | NM_001025067 | chr3  | 104639583 | 104640626 |
|   | 7  | 104571390 | 104579889 | NM_001011757 | chr7  | 104579184 | 104579759 |
|   | 6  | 104452817 | 104461316 | NM_017383    | chr6  | 104458092 | 104458918 |
|   | 5  | 104281299 | 104289826 | NM_028794    | chr5  | 104286745 | 104287350 |
|   | 3  | 104091171 | 104100006 | NM_013629    | chr3  | 104091342 | 104091943 |
|   | 3  | 104037181 | 104045680 | NM_172684    | chr3  | 104044923 | 104045658 |
|   | 14 | 104015094 | 104023593 | BC029079     | chr14 | 104022874 | 104023473 |
| X |    | 104016493 | 104025000 | NM_025921    | chrX  | 104021185 | 104021808 |
| X |    | 104016493 | 104025000 | NM_025921    | chrX  | 104018890 | 104019865 |
|   | 7  | 103893638 | 103902137 | NM_146822    | chr7  | 103897197 | 103897793 |
| X |    | 103875682 | 103884181 | NM_181319    | chrX  | 103878369 | 103879000 |
|   | 7  | 103846997 | 103855496 | NM_147118    | chr7  | 103850426 | 103851068 |
|   | 12 | 103823149 | 103832897 | NM_020494    | chr12 | 103831283 | 103831727 |
|   | 12 | 103829261 | 103837806 | NM_026790    | chr12 | 103831283 | 103831727 |
|   | 12 | 103823149 | 103832897 | NM_020494    | chr12 | 103824854 | 103825440 |
|   | 12 | 103783748 | 103792254 | NM_026580    | chr12 | 103785918 | 103786408 |
| X |    | 103603547 | 103612079 | NM_008409    | chrX  | 103609900 | 103610688 |
| X |    | 103603547 | 103612079 | NM_008409    | chrX  | 103608334 | 103609168 |
|   | 11 | 103563375 | 103571911 | NM_011719    | chr11 | 103568303 | 103568980 |
|   | 11 | 103511267 | 103519784 | NM_019650    | chr11 | 103517263 | 103517910 |
|   | 7  | 103451845 | 103460344 | NM_146841    | chr7  | 103454419 | 103455062 |
|   | 7  | 103428300 | 103436799 | NM_147080    | chr7  | 103432593 | 103433199 |
|   | 15 | 103390588 | 103399112 | NM_008134    | chr15 | 103391537 | 103392400 |
|   | 14 | 103351179 | 103359678 | NM_011143    | chr14 | 103357224 | 103359125 |
|   | 12 | 103276829 | 103285456 | NM_172806    | chr12 | 103279690 | 103280364 |
|   | 2  | 103187382 | 103195881 | NM_174994    | chr2  | 103191811 | 103192224 |
|   | 3  | 103181290 | 103189933 | NM_010937    | chr3  | 103188727 | 103189346 |
|   | 3  | 103181290 | 103189933 | NM_010937    | chr3  | 103181769 | 103182362 |
|   | 12 | 103138808 | 103147321 | NM_177140    | chr12 | 103141578 | 103142177 |
|   | 15 | 103135973 | 103144481 | NM_030720    | chr15 | 103137069 | 103137683 |
|   | 12 | 103103401 | 103111919 | NM_172584    | chr12 | 103106161 | 103106885 |
|   | 11 | 103080958 | 103089835 | NM_016896    | chr11 | 103085188 | 103085805 |
|   | 15 | 103062451 | 103071611 | NM_001039129 | chr15 | 103068651 | 103069252 |
|   | 15 | 103065351 | 103073850 | NM_001076789 | chr15 | 103068651 | 103069252 |
| X |    | 103040863 | 103049362 | NM_199468    | chrX  | 103042180 | 103043044 |
|   | 7  | 102953341 | 102961840 | NM_147054    | chr7  | 102958310 | 102958901 |
|   | 5  | 102715693 | 102724354 | NM_029270    | chr5  | 102723782 | 102724324 |
| X |    | 102685448 | 102693993 | NM_001007580 | chrX  | 102690150 | 102691344 |
| X |    | 102685448 | 102693993 | NM_001007580 | chrX  | 102686558 | 102687456 |
|   | 7  | 102642316 | 102650815 | NM_147092    | chr7  | 102649371 | 102650024 |
|   | 11 | 102632750 | 102641776 | BC050840     | chr11 | 102633739 | 102634700 |
|   | 7  | 102566061 | 102578643 | NM_147093    | chr7  | 102572427 | 102573113 |
|   | 7  | 102460063 | 102468562 | NM_146755    | chr7  | 102464495 | 102465487 |
|   | 2  | 102453499 | 102462441 | NM_001077514 | chr2  | 102461792 | 102462407 |
| X |    | 102419853 | 102428352 | NM_001001176 | chrX  | 102426822 | 102427692 |

|   |    |           |           |              |       |           |           |
|---|----|-----------|-----------|--------------|-------|-----------|-----------|
| X |    | 102383843 | 102392342 | NM_008828    | chrX  | 102387320 | 102388102 |
|   | 15 | 102331105 | 102363059 | NM_009582    | chr15 | 102356547 | 102357171 |
| X |    | 102224036 | 102232540 | NM_009726    | chrX  | 102230332 | 102231240 |
|   | 3  | 102209571 | 102218102 | NM_009814    | chr3  | 102215198 | 102215810 |
| X |    | 102129562 | 102138061 | NM_009530    | chrX  | 102131737 | 102132729 |
| X |    | 102129562 | 102138061 | NM_009530    | chrX  | 102129564 | 102131175 |
|   | 7  | 101969564 | 101982578 | NM_009710    | chr7  | 101972064 | 101972775 |
|   | 7  | 101971363 | 101982668 | NM_007491    | chr7  | 101972064 | 101972775 |
|   | 15 | 101961752 | 101970251 | NM_001033277 | chr15 | 101964659 | 101965287 |
|   | 13 | 101842373 | 101850892 | NM_025369    | chr13 | 101847061 | 101847579 |
|   | 13 | 101745631 | 101756946 | NM_001015889 | chr13 | 101755262 | 101755867 |
|   | 13 | 101748743 | 101757316 | NM_011233    | chr13 | 101755262 | 101755867 |
|   | 7  | 101728516 | 101750602 | NM_008034    | chr7  | 101741782 | 101742477 |
|   | 3  | 101731165 | 101739745 | NM_144900    | chr3  | 101732671 | 101733263 |
| X |    | 101696491 | 101704990 | NM_173436    | chrX  | 101702482 | 101703981 |
|   | 15 | 101695153 | 101703652 | NM_001003667 | chr15 | 101696737 | 101697242 |
|   | 7  | 101658113 | 101666612 | BC092139     | chr7  | 101660166 | 101660935 |
|   | 15 | 101611993 | 101620492 | NM_213728    | chr15 | 101618659 | 101619263 |
|   | 13 | 101590096 | 101598836 | NM_022011    | chr13 | 101593664 | 101594229 |
|   | 15 | 101588972 | 101597471 | NM_001003669 | chr15 | 101592185 | 101592779 |
|   | 13 | 101590096 | 101598836 | NM_022011    | chr13 | 101590373 | 101591129 |
|   | 11 | 101567681 | 101576180 | BC022656     | chr11 | 101573374 | 101574003 |
|   | 15 | 101568627 | 101577143 | NM_019956    | chr15 | 101569763 | 101570508 |
|   | 13 | 101544269 | 101559126 | NM_008670    | chr13 | 101546651 | 101547239 |
|   | 15 | 101519840 | 101528339 | NM_008476    | chr15 | 101521939 | 101522644 |
|   | 15 | 101472915 | 101481414 | NM_001004170 | chr15 | 101474730 | 101475451 |
|   | 12 | 101443423 | 101451922 | BC044817     | chr12 | 101450412 | 101451132 |
| X |    | 101317115 | 101325614 | NM_053201    | chrX  | 101322097 | 101322823 |
|   | 4  | 101209371 | 101218312 | NM_010704    | chr4  | 101215016 | 101215804 |
|   | 11 | 101135153 | 101149365 | NM_009675    | chr11 | 101138785 | 101139699 |
|   | 11 | 101056424 | 101079231 | NM_175638    | chr11 | 101077034 | 101077648 |
|   | 11 | 101056424 | 101079231 | NM_175638    | chr11 | 101075618 | 101076294 |
|   | 5  | 101058738 | 101067264 | NM_172405    | chr5  | 101063796 | 101064312 |
| X |    | 101057376 | 101065875 | NM_053206    | chrX  | 101059843 | 101060371 |
| X |    | 100871023 | 100879522 | NM_175358    | chrX  | 100872864 | 100873461 |
| X |    | 100871023 | 100879522 | NM_175358    | chrX  | 100871478 | 100872064 |
|   | 5  | 100752746 | 100761260 | NM_012001    | chr5  | 100755989 | 100756592 |
|   | 6  | 100634731 | 100643230 | NM_181590    | chr6  | 100640073 | 100640663 |
|   | 11 | 100517772 | 100534544 | NM_001038010 | chr11 | 100532757 | 100533581 |
|   | 11 | 100464242 | 100472783 | NM_177790    | chr11 | 100470384 | 100470972 |
| X |    | 100401337 | 100409836 | NM_001077354 | chrX  | 100404495 | 100405428 |
| X |    | 100401337 | 100409836 | NM_001077354 | chrX  | 100401444 | 100402100 |
|   | 7  | 100361440 | 100373340 | NM_011671    | chr7  | 100368965 | 100369750 |
|   | 11 | 100286369 | 100301570 | NM_172565    | chr11 | 100297422 | 100298006 |
|   | 11 | 100211330 | 100219833 | NM_010593    | chr11 | 100215856 | 100216463 |
| X |    | 100181468 | 100190003 | NM_011276    | chrX  | 100186547 | 100187412 |
| X |    | 100181468 | 100190003 | NM_011276    | chrX  | 100181490 | 100183727 |

|   |    |           |           |              |       |           |           |
|---|----|-----------|-----------|--------------|-------|-----------|-----------|
| X |    | 100160948 | 100175393 | AF197105     | chrX  | 100165170 | 100166794 |
|   | 15 | 100156954 | 100165462 | AB253945     | chr15 | 100159920 | 100160574 |
|   | 11 | 100130084 | 100138607 | NM_011508    | chr11 | 100136709 | 100137440 |
|   | 7  | 100123634 | 100132133 | BC032150     | chr7  | 100130005 | 100130600 |
|   | 7  | 100095707 | 100104292 | NM_027629    | chr7  | 100102091 | 100102696 |
|   | 11 | 100019621 | 100029600 | NM_016958    | chr11 | 100020175 | 100021019 |
|   | 11 | 100006837 | 100015336 | NM_201255    | chr11 | 100008367 | 100009108 |
|   | 11 | 99935101  | 99943656  | NM_010662    | chr11 | 99935097  | 99935788  |
|   | 1  | 99923416  | 99931919  | NM_013626    | chr1  | 99930105  | 99930936  |
|   | 7  | 99874522  | 99883082  | NM_133709    | chr7  | 99882470  | 99883035  |
|   | 7  | 99874522  | 99883082  | NM_133709    | chr7  | 99881273  | 99881813  |
|   | 7  | 99804463  | 99812962  | NM_183313    | chr7  | 99804024  | 99804639  |
| X |    | 99726299  | 99734798  | NM_001045541 | chrX  | 99732013  | 99732917  |
|   | 11 | 99718010  | 99733373  | NM_027568    | chr11 | 99730741  | 99731355  |
| X |    | 99726299  | 99734798  | NM_001045541 | chrX  | 99726493  | 99727100  |
|   | 15 | 99700917  | 99709444  | BC031490     | chr15 | 99702500  | 99703156  |
|   | 11 | 99683530  | 99697776  | NM_015741    | chr11 | 99689487  | 99690315  |
|   | 7  | 99635247  | 99643746  | NM_146356    | chr7  | 99642369  | 99643088  |
|   | 1  | 99589456  | 99606434  | NM_173760    | chr1  | 99598184  | 99598787  |
|   | 1  | 99594601  | 99608351  | NM_026250    | chr1  | 99598184  | 99598787  |
| X |    | 99518117  | 99526628  | NM_007674    | chrX  | 99525868  | 99526551  |
| X |    | 99518117  | 99526628  | NM_007674    | chrX  | 99524868  | 99525667  |
| X |    | 99456826  | 99465333  | NM_029170    | chrX  | 99458275  | 99459249  |
|   | 11 | 99394607  | 99457174  | NM_001039502 | chr11 | 99399353  | 99399951  |
|   | 9  | 99379151  | 99387668  | NM_031403    | chr9  | 99387028  | 99387629  |
|   | 11 | 99164685  | 99173194  | NM_010666    | chr11 | 99166736  | 99167439  |
|   | 4  | 99142317  | 99150816  | NM_010425    | chr4  | 99145334  | 99146312  |
| X |    | 99108907  | 99117406  | NM_027591    | chrX  | 99108696  | 99109393  |
|   | 12 | 99082301  | 99090800  | D83072       | chr12 | 99086301  | 99086917  |
|   | 12 | 99082301  | 99090800  | D83072       | chr12 | 99083407  | 99084018  |
|   | 11 | 99057571  | 99066157  | NM_172946    | chr11 | 99059413  | 99060028  |
|   | 11 | 99044024  | 99053107  | NM_020618    | chr11 | 99046579  | 99047243  |
|   | 3  | 99019775  | 99028287  | NM_019545    | chr3  | 99027311  | 99027912  |
| X |    | 98999682  | 99009451  | BC116811     | chrX  | 99006222  | 99006833  |
| X |    | 98999682  | 99009451  | BC116811     | chrX  | 99004327  | 99005492  |
| X |    | 98904623  | 98916395  | NM_001039116 | chrX  | 98914730  | 98915328  |
| X |    | 98904623  | 98916395  | NM_001039116 | chrX  | 98908341  | 98908934  |
|   | 7  | 98705321  | 98716589  | NM_009519    | chr7  | 98707887  | 98708308  |
| X |    | 98705339  | 98713867  | NM_027382    | chrX  | 98707560  | 98708436  |
|   | 13 | 98588956  | 98597455  | BC054101     | chr13 | 98589330  | 98589996  |
|   | 7  | 98585577  | 98594076  | BC022684     | chr7  | 98587195  | 98587705  |
|   | 7  | 98572555  | 98581054  | NM_028410    | chr7  | 98573636  | 98574229  |
|   | 10 | 98530859  | 98540348  | NM_015737    | chr10 | 98538799  | 98539763  |
|   | 7  | 98473407  | 98481906  | BC020109     | chr7  | 98472884  | 98473486  |
| X |    | 98451989  | 98460882  | NM_007709    | chrX  | 98455305  | 98455990  |
| X |    | 98451989  | 98460882  | NM_007709    | chrX  | 98452016  | 98452777  |
| X |    | 98388592  | 98397091  | NM_009094    | chrX  | 98396903  | 98397391  |

|   |    |          |          |              |       |          |          |
|---|----|----------|----------|--------------|-------|----------|----------|
|   | 15 | 98359520 | 98368272 | NM_133714    | chr15 | 98367129 | 98367781 |
| X |    | 98357247 | 98365752 | NM_146235    | chrX  | 98359807 | 98360518 |
| X |    | 98357247 | 98365752 | NM_146235    | chrX  | 98359152 | 98359745 |
| X |    | 98344670 | 98353169 | BC004701     | chrX  | 98351715 | 98352276 |
| X |    | 98344670 | 98353169 | BC004701     | chrX  | 98347248 | 98348267 |
| X |    | 98344670 | 98353169 | BC004701     | chrX  | 98346352 | 98346979 |
| X |    | 98344670 | 98353169 | BC004701     | chrX  | 98345640 | 98346265 |
| X |    | 98316184 | 98324683 | NM_027181    | chrX  | 98323428 | 98324268 |
| X |    | 98316184 | 98324683 | NM_027181    | chrX  | 98322481 | 98323072 |
| X |    | 98316184 | 98324683 | NM_027181    | chrX  | 98321375 | 98321966 |
| X |    | 98271416 | 98280023 | NM_183318    | chrX  | 98277543 | 98278260 |
| X |    | 98271416 | 98280023 | NM_183318    | chrX  | 98273117 | 98273836 |
| X |    | 98271416 | 98280023 | NM_183318    | chrX  | 98272034 | 98272634 |
|   | 8  | 98210461 | 98227079 | NM_024467    | chr8  | 98215987 | 98216584 |
|   | 8  | 98215469 | 98223968 | NM_133954    | chr8  | 98215987 | 98216584 |
|   | 8  | 98193215 | 98202861 | NM_145601    | chr8  | 98195968 | 98196617 |
|   | 8  | 98194644 | 98203241 | NM_199455    | chr8  | 98195968 | 98196617 |
|   | 15 | 98166474 | 98174973 | NM_146281    | chr15 | 98169280 | 98169893 |
|   | 15 | 98139083 | 98147582 | NM_001011778 | chr15 | 98140425 | 98141161 |
|   | 4  | 98032652 | 98041490 | NM_007704    | chr4  | 98038946 | 98039609 |
|   | 8  | 97938232 | 97947628 | NM_001042715 | chr8  | 97938316 | 97938907 |
|   | 11 | 97897758 | 97906257 | BC004087     | chr11 | 97903855 | 97904727 |
|   | 11 | 97897758 | 97906257 | BC004087     | chr11 | 97900336 | 97900976 |
| X |    | 97836783 | 97845438 | NM_139144    | chrX  | 97838103 | 97839162 |
|   | 11 | 97799957 | 97808470 | NM_028199    | chr11 | 97808067 | 97808450 |
|   | 3  | 97708280 | 97716954 | NM_010232    | chr3  | 97714152 | 97714789 |
|   | 16 | 97657300 | 97665852 | NM_020622    | chr16 | 97662878 | 97663442 |
| X |    | 97645828 | 97654352 | NM_013712    | chrX  | 97647428 | 97648158 |
| X |    | 97626405 | 97642425 | NM_023144    | chrX  | 97632546 | 97633344 |
| X |    | 97626405 | 97642425 | NM_023144    | chrX  | 97631083 | 97632042 |
| X |    | 97574056 | 97589368 | NM_008124    | chrX  | 97584901 | 97585686 |
| X |    | 97574056 | 97589368 | NM_008124    | chrX  | 97582194 | 97583166 |
|   | 11 | 97512929 | 97522436 | NM_009545    | chr11 | 97518447 | 97519032 |
|   | 11 | 97513524 | 97522061 | NM_011971    | chr11 | 97518447 | 97519032 |
| X |    | 97482743 | 97491242 | BC057085     | chrX  | 97483124 | 97484170 |
| X |    | 97451247 | 97459966 | NM_018789    | chrX  | 97457002 | 97457948 |
| X |    | 97451247 | 97459966 | NM_018789    | chrX  | 97455997 | 97456887 |
|   | 1  | 97323003 | 97331504 | BC037146     | chr1  | 97327614 | 97328318 |
|   | 3  | 97290285 | 97298784 | BC019641     | chr3  | 97297090 | 97297964 |
|   | 2  | 97262496 | 97271120 | NM_178725    | chr2  | 97266151 | 97266925 |
|   | 11 | 97260250 | 97268749 | NM_021493    | chr11 | 97263746 | 97264628 |
| X |    | 97259855 | 97268358 | NM_031384    | chrX  | 97262252 | 97263457 |
|   | 10 | 97067756 | 97081872 | NM_007884    | chr10 | 97070173 | 97070780 |
| X |    | 96926659 | 96935219 | NM_023608    | chrX  | 96929332 | 96929967 |
|   | 9  | 96917886 | 96926393 | NM_138756    | chr9  | 96925055 | 96925664 |
|   | 15 | 96881491 | 96889990 | NM_027052    | chr15 | 96883004 | 96884068 |
|   | 11 | 96860716 | 96869215 | BC085242     | chr11 | 96866933 | 96867548 |

|   |    |          |                       |       |          |          |
|---|----|----------|-----------------------|-------|----------|----------|
|   | 15 | 96845857 | 96854372 AY027919     | chr15 | 96851910 | 96852572 |
| X |    | 96822456 | 96831361 NM_008446    | chrX  | 96829337 | 96829715 |
| X |    | 96826127 | 96834657 NM_028303    | chrX  | 96829337 | 96829715 |
| X |    | 96822456 | 96831361 NM_008446    | chrX  | 96828438 | 96829093 |
| X |    | 96826127 | 96834657 NM_028303    | chrX  | 96828438 | 96829093 |
| X |    | 96822456 | 96831361 NM_008446    | chrX  | 96825208 | 96826343 |
| X |    | 96826127 | 96834657 NM_028303    | chrX  | 96825208 | 96826343 |
|   | 3  | 96807069 | 96815568 NM_026406    | chr3  | 96812986 | 96813581 |
|   | 3  | 96810360 | 96818870 BC026793     | chr3  | 96812986 | 96813581 |
| X |    | 96794779 | 96803588 NM_020621    | chrX  | 96795633 | 96796686 |
|   | 3  | 96775874 | 96784373 NM_146135    | chr3  | 96781368 | 96782045 |
| X |    | 96691064 | 96699563 NM_008784    | chrX  | 96696545 | 96697144 |
| X |    | 96691064 | 96699563 NM_008784    | chrX  | 96694261 | 96694877 |
|   | 3  | 96637362 | 96646094 NM_023719    | chr3  | 96643928 | 96644518 |
|   | 13 | 96463047 | 96471546 BC027286     | chr13 | 96464211 | 96465306 |
|   | 3  | 96376875 | 96385374 NM_010186    | chr3  | 96377355 | 96378110 |
|   | 13 | 96348505 | 96357004 NM_172263    | chr13 | 96355989 | 96356750 |
|   | 3  | 96299321 | 96309045 NM_178214    | chr3  | 96305901 | 96306494 |
|   | 16 | 96184763 | 96193436 NM_145125    | chr16 | 96191974 | 96192457 |
|   | 12 | 96168509 | 96177008 AY495669     | chr12 | 96175086 | 96175824 |
|   | 12 | 96168509 | 96177008 AY495669     | chr12 | 96172947 | 96173552 |
|   | 6  | 96072617 | 96081315 NM_182808    | chr6  | 96078977 | 96079655 |
|   | 11 | 95888626 | 95905946 NM_007506    | chr11 | 95890988 | 95891606 |
|   | 8  | 95738478 | 95746977 NM_173014    | chr8  | 95744908 | 95745535 |
|   | 3  | 95738192 | 95746712 NM_008562    | chr3  | 95744729 | 95745508 |
|   | 8  | 95738478 | 95746977 NM_173014    | chr8  | 95744080 | 95744674 |
|   | 5  | 95707855 | 95724394 BC099941     | chr5  | 95723230 | 95723874 |
|   | 11 | 95652385 | 95661307 NM_001038664 | chr11 | 95656924 | 95657666 |
|   | 11 | 95655751 | 95664250 NM_025659    | chr11 | 95656924 | 95657666 |
|   | 11 | 95559157 | 95567656 BC055752     | chr11 | 95567103 | 95567566 |
|   | 4  | 95561128 | 95575558 NM_145548    | chr4  | 95563788 | 95564669 |
| X |    | 95332849 | 95341855 NM_010110    | chrX  | 95340699 | 95341821 |
|   | 1  | 95336531 | 95345030 NM_145519    | chr1  | 95339388 | 95340005 |
| X |    | 95332849 | 95341855 NM_010110    | chrX  | 95338067 | 95339201 |
| X |    | 95332849 | 95341855 NM_010110    | chrX  | 95332930 | 95333621 |
|   | 3  | 95239906 | 95252277 NM_011351    | chr3  | 95248208 | 95248927 |
| X |    | 95239384 | 95247883 NM_199018    | chrX  | 95239971 | 95241176 |
|   | 3  | 95216893 | 95233764 NM_027206    | chr3  | 95225360 | 95225946 |
|   | 3  | 95213514 | 95222080 NM_028134    | chr3  | 95219485 | 95220434 |
|   | 3  | 95216893 | 95233764 NM_027206    | chr3  | 95219485 | 95220434 |
| X |    | 95134500 | 95143364 NM_207633    | chrX  | 95141570 | 95142189 |
| X |    | 95134500 | 95143364 NM_207633    | chrX  | 95139167 | 95139626 |
|   | 11 | 95123765 | 95135727 NM_177619    | chr11 | 95126536 | 95127226 |
| X |    | 95091001 | 95099704 NM_052976    | chrX  | 95091876 | 95092677 |
|   | 6  | 95077422 | 95086491 NM_001008785 | chr6  | 95083093 | 95083811 |
|   | 10 | 94991017 | 94999834 NM_027722    | chr10 | 94995258 | 94995963 |
|   | 16 | 94962971 | 94971488 NM_001025590 | chr16 | 94970406 | 94971155 |

|   |    |          |          |              |       |          |          |
|---|----|----------|----------|--------------|-------|----------|----------|
|   | 10 | 94929116 | 94937615 | NM_026065    | chr10 | 94932152 | 94932865 |
|   | 10 | 94750154 | 94759785 | NM_009950    | chr10 | 94753748 | 94754345 |
|   | 16 | 94486710 | 94495209 | NM_009441    | chr16 | 94491347 | 94491961 |
|   | 9  | 94473270 | 94481769 | NM_177909    | chr9  | 94480475 | 94481187 |
|   | 3  | 94452190 | 94465408 | NM_011281    | chr3  | 94462584 | 94463192 |
|   | 1  | 94432245 | 94440744 | NM_146491    | chr1  | 94436433 | 94437106 |
|   | 3  | 94421503 | 94430020 | NM_025416    | chr3  | 94425965 | 94426555 |
|   | 1  | 94339970 | 94348469 | NM_147039    | chr1  | 94344420 | 94345173 |
|   | 1  | 94339970 | 94348469 | NM_147039    | chr1  | 94340444 | 94341062 |
|   | 12 | 94326981 | 94335755 | NM_153121    | chr12 | 94328790 | 94329682 |
|   | 13 | 94168057 | 94176556 | NM_177623    | chr13 | 94169199 | 94169794 |
|   | 10 | 93725956 | 93734502 | NM_174999    | chr10 | 93726996 | 93727708 |
|   | 13 | 93705891 | 93714513 | NM_172588    | chr13 | 93711558 | 93712140 |
|   | 13 | 93705891 | 93714513 | NM_172588    | chr13 | 93709822 | 93710413 |
|   | 5  | 93672255 | 93680771 | NM_175096    | chr5  | 93680162 | 93680726 |
|   | 2  | 93620881 | 93629384 | NM_010163    | chr2  | 93624456 | 93625034 |
|   | 2  | 93620881 | 93629384 | NM_010163    | chr2  | 93620886 | 93621503 |
| X |    | 93577370 | 93585891 | NM_175540    | chrX  | 93577430 | 93578093 |
|   | 3  | 93473103 | 93481602 | NM_009100    | chr3  | 93475895 | 93476460 |
|   | 13 | 93449536 | 93458463 | NM_010049    | chr13 | 93454706 | 93455324 |
|   | 13 | 93452769 | 93461756 | NM_010829    | chr13 | 93454706 | 93455324 |
|   | 5  | 93435963 | 93446685 | NM_019494    | chr5  | 93436045 | 93436673 |
|   | 1  | 93364971 | 93373985 | NM_001039126 | chr1  | 93370773 | 93371571 |
|   | 10 | 93317059 | 93327001 | NM_019648    | chr10 | 93320208 | 93321188 |
| X |    | 93269315 | 93281146 | NM_001033361 | chrX  | 93280256 | 93280847 |
|   | 10 | 93255354 | 93263853 | NM_183199    | chr10 | 93263041 | 93263809 |
|   | 2  | 92982423 | 92994389 | NM_001025246 | chr2  | 92983570 | 92984185 |
| X |    | 92910160 | 92918823 | NM_029536    | chrX  | 92917988 | 92918644 |
| X |    | 92910160 | 92918823 | NM_029536    | chrX  | 92917153 | 92917814 |
|   | 2  | 92822795 | 92832686 | NM_001002794 | chr2  | 92830289 | 92831114 |
|   | 4  | 92825030 | 92833529 | NM_026954    | chr4  | 92829670 | 92830310 |
|   | 3  | 92770114 | 92778613 | NM_027137    | chr3  | 92770979 | 92771594 |
|   | 3  | 92655684 | 92665118 | NM_008412    | chr3  | 92658721 | 92659569 |
|   | 7  | 92610906 | 92619405 | NM_029494    | chr7  | 92617418 | 92618415 |
|   | 10 | 92584689 | 92593188 | BC064815     | chr10 | 92591376 | 92592028 |
|   | 3  | 92583397 | 92591896 | NM_173070    | chr3  | 92585625 | 92586298 |
|   | 3  | 92540521 | 92549020 | NM_011478    | chr3  | 92542384 | 92542973 |
|   | 3  | 92521676 | 92530182 | NM_009265    | chr3  | 92524029 | 92525037 |
|   | 3  | 92511985 | 92520484 | NM_011477    | chr3  | 92518766 | 92519366 |
|   | 3  | 92512314 | 92520826 | BC031517     | chr3  | 92518766 | 92519366 |
|   | 3  | 92497485 | 92506013 | AY158994     | chr3  | 92504099 | 92504831 |
|   | 16 | 92380993 | 92389505 | NM_172469    | chr16 | 92384419 | 92385088 |
| X |    | 92292764 | 92301281 | NM_010833    | chrX  | 92297078 | 92298150 |
|   | 16 | 92245775 | 92254327 | NM_008424    | chr16 | 92248040 | 92248624 |
| X |    | 92157106 | 92165678 | NM_152822    | chrX  | 92159000 | 92159589 |
| X |    | 92157106 | 92165678 | NM_152822    | chrX  | 92157473 | 92158341 |
|   | 12 | 91992637 | 92002044 | NM_175335    | chr12 | 91995526 | 91996116 |

|   |    |          |          |              |       |          |          |
|---|----|----------|----------|--------------|-------|----------|----------|
|   | 15 | 91950308 | 91958873 | NM_007727    | chr15 | 91950835 | 91951509 |
|   | 16 | 91575088 | 91583612 | NM_021720    | chr16 | 91582012 | 91582572 |
|   | 5  | 91559937 | 91568450 | NM_007423    | chr5  | 91563594 | 91564147 |
|   | 5  | 91559937 | 91568450 | NM_007423    | chr5  | 91559951 | 91560679 |
|   | 8  | 91531451 | 91543945 | NM_145857    | chr8  | 91539433 | 91540113 |
|   | 16 | 91529500 | 91541831 | NM_010256    | chr16 | 91530426 | 91531032 |
|   | 16 | 91429953 | 91438452 | NM_008338    | chr16 | 91436410 | 91437293 |
|   | 6  | 91433217 | 91441767 | NM_028766    | chr6  | 91433605 | 91434269 |
|   | 9  | 91160877 | 91169376 | NM_009576    | chr9  | 91164733 | 91165736 |
|   | 9  | 91160951 | 91169704 | NM_009573    | chr9  | 91164733 | 91165736 |
|   | 6  | 91079824 | 91088330 | NM_018815    | chr6  | 91086991 | 91087658 |
|   | 2  | 90997758 | 91006268 | NM_007387    | chr2  | 91003686 | 91004276 |
|   | 2  | 90891636 | 90900238 | NM_011355    | chr2  | 90899384 | 90900006 |
| X |    | 90882788 | 90891537 | NM_008179    | chrX  | 90890875 | 90891517 |
| X |    | 90882788 | 90891537 | NM_008179    | chrX  | 90889226 | 90890274 |
|   | 3  | 90734229 | 90743917 | NM_199422    | chr3  | 90742626 | 90743229 |
|   | 2  | 90699623 | 90708124 | NM_025991    | chr2  | 90706587 | 90707267 |
|   | 2  | 90703015 | 90711560 | NM_026688    | chr2  | 90706587 | 90707267 |
| X |    | 90613873 | 90622501 | NM_026673    | chrX  | 90618295 | 90619021 |
| X |    | 90615953 | 90625496 | BC115707     | chrX  | 90618295 | 90619021 |
|   | 5  | 90606288 | 90614787 | BC085272     | chr5  | 90610629 | 90611244 |
|   | 5  | 90596628 | 90605127 | NM_133192    | chr5  | 90598872 | 90599522 |
|   | 3  | 90583536 | 90610790 | NM_023215    | chr3  | 90597121 | 90597716 |
|   | 3  | 90591452 | 90603186 | NM_009113    | chr3  | 90597121 | 90597716 |
|   | 11 | 90501173 | 90509691 | NM_028011    | chr11 | 90504013 | 90504863 |
|   | 3  | 90485838 | 90494337 | BC003209     | chr3  | 90489424 | 90490356 |
| X |    | 90481649 | 90490222 | NM_001039060 | chrX  | 90482826 | 90483531 |
|   | 6  | 90391437 | 90400291 | BC047211     | chr6  | 90400055 | 90400495 |
| X |    | 90373120 | 90382126 | NM_001044386 | chrX  | 90377982 | 90379079 |
|   | 7  | 90348688 | 90357187 | NM_026734    | chr7  | 90356676 | 90357150 |
|   | 3  | 90142723 | 90161120 | NM_022314    | chr3  | 90147547 | 90148439 |
|   | 3  | 90131329 | 90144402 | NM_028475    | chr3  | 90136588 | 90137700 |
|   | 3  | 90131563 | 90141368 | NM_025762    | chr3  | 90136588 | 90137700 |
|   | 1  | 90098080 | 90114750 | NM_198652    | chr1  | 90103757 | 90104315 |
|   | 6  | 90066779 | 90075278 | NM_053225    | chr6  | 90072353 | 90072982 |
|   | 2  | 90020835 | 90029335 | NM_146265    | chr2  | 90022403 | 90022992 |
|   | 9  | 90017850 | 90026349 | BC056467     | chr9  | 90020003 | 90020610 |
|   | 6  | 89999846 | 90008345 | NM_053218    | chr6  | 90005768 | 90006586 |
|   | 6  | 89999846 | 90008345 | NM_053218    | chr6  | 90004795 | 90005494 |
|   | 6  | 89999846 | 90008345 | NM_053218    | chr6  | 90002560 | 90003591 |
|   | 6  | 89999846 | 90008345 | NM_053218    | chr6  | 90001762 | 90002362 |
|   | 6  | 89981392 | 89989891 | NM_053219    | chr6  | 89986870 | 89988302 |
| X |    | 89921831 | 89930493 | NM_211138    | chrX  | 89928794 | 89929512 |
|   | 1  | 89920249 | 89940532 | NM_201642    | chr1  | 89926238 | 89926896 |
| X |    | 89882352 | 89890874 | NM_008892    | chrX  | 89884820 | 89885707 |
| X |    | 89882352 | 89890874 | NM_008892    | chrX  | 89883940 | 89884698 |
| X |    | 89882352 | 89890874 | NM_008892    | chrX  | 89882766 | 89883667 |



|   |    |          |                       |       |          |          |
|---|----|----------|-----------------------|-------|----------|----------|
|   | 2  | 89831760 | 89840259 NM_146343    | chr2  | 89837822 | 89838424 |
|   | 9  | 89701668 | 89710314 NM_011245    | chr9  | 89705105 | 89705688 |
|   | 2  | 89634283 | 89642782 NM_146983    | chr2  | 89638456 | 89639051 |
| X |    | 89533241 | 89541864 NM_007492    | chrX  | 89537802 | 89538991 |
|   | 9  | 89533869 | 89542368 NM_207260    | chr9  | 89536410 | 89537028 |
|   | 8  | 89508212 | 89516711 NM_025827    | chr8  | 89510667 | 89511266 |
|   | 7  | 89501914 | 89510509 NM_181407    | chr7  | 89510185 | 89510791 |
|   | 3  | 89495244 | 89510218 NM_177041    | chr3  | 89508659 | 89509272 |
|   | 3  | 89464685 | 89473444 L35307       | chr3  | 89465695 | 89466335 |
|   | 1  | 89419721 | 89428220 NM_015750    | chr1  | 89427637 | 89428196 |
|   | 15 | 89415695 | 89425672 NM_026817    | chr15 | 89416101 | 89416721 |
|   | 18 | 89325620 | 89334287 NM_178687    | chr18 | 89333092 | 89333723 |
|   | 2  | 89326748 | 89335247 NM_146969    | chr2  | 89328218 | 89328851 |
|   | 3  | 89308979 | 89317532 NM_013605    | chr3  | 89315987 | 89316574 |
|   | 2  | 89281473 | 89289972 NM_146455    | chr2  | 89283546 | 89284142 |
|   | 1  | 89152213 | 89160723 NM_146112    | chr1  | 89157005 | 89157702 |
|   | 16 | 89033998 | 89049310 BC048518     | chr16 | 89039616 | 89040258 |
|   | 15 | 88986051 | 89000814 BC007481     | chr15 | 88992029 | 88992704 |
|   | 15 | 88986051 | 89000814 BC007481     | chr15 | 88986989 | 88987598 |
|   | 15 | 88948084 | 88974387 NM_199198    | chr15 | 88954357 | 88955162 |
|   | 15 | 88910873 | 88919372 NM_027905    | chr15 | 88912823 | 88913467 |
|   | 15 | 88897830 | 88906860 NM_026485    | chr15 | 88901709 | 88902493 |
|   | 16 | 88755770 | 88779948 NM_130870    | chr16 | 88768589 | 88769307 |
|   | 4  | 88750924 | 88759423 NM_001040654 | chr4  | 88756799 | 88757995 |
| X |    | 88736668 | 88745167 NM_001034103 | chrX  | 88739089 | 88739729 |
|   | 6  | 88684125 | 88692968 NM_011844    | chr6  | 88690440 | 88691164 |
|   | 11 | 88665090 | 88673593 NM_009648    | chr11 | 88672297 | 88673250 |
|   | 15 | 88601285 | 88609784 BC092524     | chr15 | 88608710 | 88609591 |
|   | 6  | 88590587 | 88599086 NM_029013    | chr6  | 88592487 | 88593240 |
|   | 3  | 88493742 | 88502261 NM_025928    | chr3  | 88494398 | 88495014 |
|   | 6  | 88425098 | 88433605 NM_019685    | chr6  | 88428250 | 88428847 |
|   | 8  | 88252930 | 88261429 NM_175441    | chr8  | 88258635 | 88259239 |
|   | 9  | 88194015 | 88202514 BC043328     | chr9  | 88196328 | 88196925 |
|   | 2  | 88134406 | 88142905 NM_146771    | chr2  | 88142301 | 88142880 |
|   | 1  | 88128415 | 88137172 NM_145222    | chr1  | 88135805 | 88136445 |
| X |    | 88033196 | 88041737 BC116773     | chrX  | 88040621 | 88041597 |
| X |    | 88033196 | 88041737 BC116773     | chrX  | 88035166 | 88035864 |
|   | 3  | 88010241 | 88018753 NM_177663    | chr3  | 88013619 | 88014231 |
|   | 3  | 88011686 | 88022073 NM_153562    | chr3  | 88013619 | 88014231 |
|   | 3  | 87999471 | 88010167 NM_026591    | chr3  | 87999475 | 88000175 |
|   | 10 | 87931218 | 87939724 NM_144807    | chr10 | 87934100 | 87935141 |
|   | 17 | 87877401 | 87885935 NM_010830    | chr17 | 87881950 | 87882549 |
|   | 11 | 87878474 | 87887035 NM_016686    | chr11 | 87881594 | 87881953 |
|   | 17 | 87877401 | 87885935 NM_010830    | chr17 | 87881253 | 87881638 |
|   | 17 | 87877401 | 87885935 NM_010830    | chr17 | 87879724 | 87880187 |
|   | 8  | 87719847 | 87750654 NM_009010    | chr8  | 87736049 | 87736706 |
|   | 5  | 87411665 | 87420164 AF448809     | chr5  | 87412196 | 87413001 |

|   |    |          |                       |       |          |          |
|---|----|----------|-----------------------|-------|----------|----------|
|   | 2  | 87402229 | 87410728 NM_146838    | chr2  | 87406770 | 87407515 |
|   | 5  | 87399798 | 87408297 AF539752     | chr5  | 87404200 | 87404872 |
|   | 12 | 87244220 | 87252719 NM_011934    | chr12 | 87250420 | 87251017 |
|   | 2  | 87152265 | 87160764 NM_147029    | chr2  | 87154754 | 87155448 |
|   | 7  | 87116556 | 87125058 NM_015760    | chr7  | 87124093 | 87125023 |
|   | 8  | 87024394 | 87043858 NM_145970    | chr8  | 87026744 | 87027555 |
|   | 14 | 86958346 | 86966850 BC039659     | chr14 | 86963189 | 86963817 |
|   | 17 | 86927894 | 86936421 NM_019936    | chr17 | 86932557 | 86933170 |
|   | 17 | 86931217 | 86939727 NM_008838    | chr17 | 86932557 | 86933170 |
|   | 17 | 86927894 | 86936421 NM_019936    | chr17 | 86928456 | 86929225 |
|   | 11 | 86919426 | 86927955 NM_025377    | chr11 | 86925480 | 86926354 |
|   | 11 | 86922385 | 86930884 NM_175563    | chr11 | 86925480 | 86926354 |
|   | 11 | 86919426 | 86927955 NM_025377    | chr11 | 86924299 | 86924954 |
|   | 11 | 86922385 | 86930884 NM_175563    | chr11 | 86924299 | 86924954 |
|   | 3  | 86631453 | 86640556 NM_011839    | chr3  | 86638257 | 86638966 |
|   | 2  | 86623515 | 86632014 NM_146365    | chr2  | 86629157 | 86629902 |
|   | 2  | 86580571 | 86589070 NM_146366    | chr2  | 86584620 | 86585331 |
|   | 11 | 86571188 | 86579687 NM_001003908 | chr11 | 86577193 | 86577612 |
|   | 2  | 86553076 | 86561575 NM_146847    | chr2  | 86559869 | 86560518 |
|   | 18 | 86523145 | 86532311 NM_144946    | chr18 | 86529940 | 86530538 |
|   | 6  | 86489081 | 86497799 NM_011865    | chr6  | 86491522 | 86492161 |
|   | 12 | 86482208 | 86491620 NM_030887    | chr12 | 86487756 | 86488322 |
|   | 2  | 86456796 | 86465295 NM_146590    | chr2  | 86462443 | 86463327 |
|   | 2  | 86303300 | 86311799 NM_146406    | chr2  | 86308061 | 86309040 |
|   | 2  | 86244320 | 86252819 NM_146408    | chr2  | 86246188 | 86246778 |
|   | 2  | 86212390 | 86220889 NM_207134    | chr2  | 86216496 | 86217290 |
| X |    | 86183072 | 86191571 NM_001033880 | chrX  | 86187840 | 86188361 |
| X |    | 86183072 | 86191571 NM_001033880 | chrX  | 86185206 | 86186203 |
|   | 7  | 86143049 | 86151548 NM_001011520 | chr7  | 86146771 | 86147355 |
|   | 10 | 86129611 | 86145216 NM_001003910 | chr10 | 86142399 | 86143040 |
|   | 6  | 86042343 | 86050913 NM_013458    | chr6  | 86044580 | 86045170 |
|   | 12 | 86008964 | 86017463 BC024066     | chr12 | 86016582 | 86017420 |
|   | 15 | 86011408 | 86019907 NM_145475    | chr15 | 86014402 | 86014979 |
|   | 2  | 85997090 | 86005589 NM_147017    | chr2  | 85997343 | 85998137 |
|   | 6  | 85988381 | 85996880 BC053032     | chr6  | 85996293 | 85996849 |
|   | 12 | 85993035 | 86001534 NM_175198    | chr12 | 85993416 | 85994529 |
|   | 12 | 85993940 | 86002498 NM_030225    | chr12 | 85993416 | 85994529 |
|   | 2  | 85980449 | 85988948 NM_146583    | chr2  | 85986334 | 85987047 |
|   | 2  | 85980449 | 85988948 NM_146583    | chr2  | 85984879 | 85985749 |
|   | 2  | 85970155 | 85978654 NM_147011    | chr2  | 85975612 | 85976205 |
|   | 2  | 85945072 | 85953571 NM_207561    | chr2  | 85949607 | 85950334 |
|   | 2  | 85945072 | 85953571 NM_207561    | chr2  | 85946499 | 85947087 |
|   | 2  | 85930001 | 85938500 NM_001011784 | chr2  | 85931115 | 85932839 |
|   | 6  | 85915489 | 85923988 BC028640     | chr6  | 85918005 | 85918597 |
|   | 4  | 85808015 | 85816523 NM_172542    | chr4  | 85815411 | 85816029 |
|   | 6  | 85794994 | 85803740 NM_023455    | chr6  | 85798410 | 85799565 |
|   | 2  | 85745904 | 85754403 NM_001011774 | chr2  | 85750701 | 85751395 |

|   |    |          |          |              |       |          |          |
|---|----|----------|----------|--------------|-------|----------|----------|
| X |    | 85659909 | 85668408 | NM_008821    | chrX  | 85662864 | 85663603 |
|   | 15 | 85557542 | 85566048 | NM_011144    | chr15 | 85563006 | 85563841 |
|   | 2  | 85558714 | 85567213 | NM_146568    | chr2  | 85560248 | 85560862 |
|   | 2  | 85516246 | 85524745 | NM_146572    | chr2  | 85522388 | 85523307 |
|   | 6  | 85466045 | 85474652 | NM_001001160 | chr6  | 85466878 | 85467673 |
|   | 2  | 85317275 | 85325863 | BC120879     | chr2  | 85318857 | 85319466 |
|   | 11 | 85121449 | 85130069 | NM_016910    | chr11 | 85127249 | 85127840 |
|   | 15 | 84957224 | 84965723 | NM_080470    | chr15 | 84964189 | 84964791 |
|   | 15 | 84953844 | 84962439 | BC112373     | chr15 | 84959488 | 84960251 |
|   | 15 | 84957224 | 84965723 | NM_080470    | chr15 | 84959488 | 84960251 |
|   | 17 | 84414221 | 84422755 | NM_177606    | chr17 | 84419903 | 84420583 |
|   | 12 | 84327169 | 84335668 | BC048572     | chr12 | 84333073 | 84333767 |
|   | 17 | 84274594 | 84283093 | BC052885     | chr17 | 84278552 | 84279573 |
|   | 10 | 84261947 | 84270446 | NM_027689    | chr10 | 84268565 | 84269146 |
|   | 17 | 84092964 | 84102273 | NM_001001806 | chr17 | 84096145 | 84096972 |
|   | 13 | 84072845 | 84081344 | AY344585     | chr13 | 84080135 | 84080749 |
|   | 7  | 84025579 | 84034078 | NM_133722    | chr7  | 84032774 | 84033565 |
|   | 15 | 83890616 | 83899115 | NM_029946    | chr15 | 83897457 | 83898190 |
|   | 7  | 83668512 | 83677018 | NM_029335    | chr7  | 83672035 | 83672853 |
|   | 6  | 83641016 | 83649515 | NM_144943    | chr6  | 83643143 | 83643752 |
|   | 6  | 83619235 | 83627774 | NM_016751    | chr6  | 83625780 | 83626515 |
|   | 15 | 83601789 | 83610288 | NM_172610    | chr15 | 83605513 | 83606072 |
|   | 6  | 83490638 | 83507890 | NM_009610    | chr6  | 83492310 | 83493193 |
|   | 6  | 83302715 | 83317641 | NM_175277    | chr6  | 83306551 | 83307307 |
|   | 11 | 83283303 | 83291802 | NM_027427    | chr11 | 83289519 | 83290110 |
|   | 18 | 83130598 | 83139097 | BC023380     | chr18 | 83132237 | 83132909 |
|   | 3  | 83106081 | 83121129 | NM_010196    | chr3  | 83108316 | 83108901 |
|   | 18 | 83084047 | 83092546 | NM_183033    | chr18 | 83089342 | 83089987 |
|   | 6  | 83017594 | 83026229 | NM_019752    | chr6  | 83024386 | 83024979 |
|   | 15 | 82997457 | 83005974 | NM_029787    | chr15 | 82999122 | 83000050 |
|   | 11 | 82927040 | 82935543 | NM_011407    | chr11 | 82929760 | 82930379 |
|   | 11 | 82805416 | 82814025 | NM_172796    | chr11 | 82812985 | 82813502 |
|   | 12 | 82772878 | 82781377 | NM_018814    | chr12 | 82776715 | 82777340 |
|   | 18 | 82682891 | 82691473 | NM_001025251 | chr18 | 82688248 | 82689016 |
|   | 1  | 82644973 | 82653480 | NM_025453    | chr1  | 82645756 | 82646346 |
|   | 11 | 82642514 | 82651226 | NM_026097    | chr11 | 82645260 | 82646108 |
|   | 18 | 82603551 | 82612119 | NM_001025245 | chr18 | 82605639 | 82606266 |
|   | 12 | 82544217 | 82552716 | NM_001033149 | chr12 | 82551736 | 82552351 |
|   | 15 | 82515325 | 82524265 | BC059104     | chr15 | 82517746 | 82518357 |
|   | 1  | 82460000 | 82468499 | NM_007734    | chr1  | 82467231 | 82467892 |
|   | 1  | 82463317 | 82471816 | NM_007735    | chr1  | 82467231 | 82467892 |
| X |    | 82438494 | 82447005 | NM_007430    | chrX  | 82443521 | 82444121 |
|   | 15 | 82201286 | 82213926 | NM_019823    | chr15 | 82209701 | 82210077 |
|   | 11 | 81993499 | 82002007 | NM_011329    | chr11 | 81994166 | 81994764 |
|   | 4  | 81973516 | 81982354 | NM_008687    | chr4  | 81976291 | 81976975 |
|   | 12 | 81703407 | 81711906 | NM_178682    | chr12 | 81710564 | 81711581 |
|   | 15 | 81185503 | 81194029 | NM_011399    | chr15 | 81187241 | 81187848 |

|   |    |          |                       |       |          |          |
|---|----|----------|-----------------------|-------|----------|----------|
|   | 10 | 81026676 | 81035175 NM_027480    | chr10 | 81028044 | 81028610 |
|   | 10 | 81028188 | 81036687 NM_181586    | chr10 | 81028044 | 81028610 |
|   | 7  | 80982312 | 80990811 NM_001004184 | chr7  | 80983386 | 80984233 |
|   | 10 | 80690109 | 80698653 NM_008844    | chr10 | 80697719 | 80698267 |
|   | 10 | 80691862 | 80700396 NM_013769    | chr10 | 80697719 | 80698267 |
|   | 10 | 80643716 | 80663843 NM_010768    | chr10 | 80652475 | 80653213 |
|   | 10 | 80602629 | 80611180 NM_027120    | chr10 | 80609458 | 80609995 |
|   | 10 | 80426007 | 80434506 NM_145217    | chr10 | 80433158 | 80433752 |
|   | 8  | 80344498 | 80352997 AF297029     | chr8  | 80345396 | 80346998 |
|   | 10 | 80327216 | 80335719 NM_008655    | chr10 | 80332877 | 80333473 |
|   | 18 | 80202977 | 80211602 NM_053117    | chr18 | 80209826 | 80210437 |
|   | 10 | 80191534 | 80210876 NM_013651    | chr10 | 80208151 | 80208735 |
|   | 17 | 80192538 | 80205340 NM_194269    | chr17 | 80202686 | 80203442 |
|   | 17 | 80195965 | 80204802 NM_198942    | chr17 | 80202686 | 80203442 |
|   | 11 | 79951723 | 79964314 NM_183275    | chr11 | 79958260 | 79958875 |
|   | 15 | 79839231 | 79848063 NM_011057    | chr15 | 79847575 | 79848027 |
|   | 11 | 79776037 | 79784582 NM_144826    | chr11 | 79781567 | 79782151 |
| X |    | 79738144 | 79746643 AB032764     | chrX  | 79744511 | 79745373 |
| X |    | 79738144 | 79746643 AB032764     | chrX  | 79742834 | 79743784 |
| X |    | 79738144 | 79746643 AB032764     | chrX  | 79739888 | 79741248 |
|   | 2  | 79706739 | 79715238 NM_001009979 | chr2  | 79707035 | 79707773 |
|   | 1  | 79638208 | 79646793 NM_027057    | chr1  | 79640192 | 79640828 |
|   | 10 | 79623727 | 79639902 NM_023431    | chr10 | 79629711 | 79630323 |
|   | 17 | 79620868 | 79629367 NM_009994    | chr17 | 79626436 | 79627084 |
|   | 10 | 79564970 | 79585370 NM_007909    | chr10 | 79570309 | 79570952 |
|   | 10 | 79513331 | 79522225 NM_011492    | chr10 | 79519165 | 79519773 |
|   | 15 | 79511748 | 79521074 NM_028792    | chr15 | 79513842 | 79514456 |
|   | 15 | 79512150 | 79520763 NM_013818    | chr15 | 79513842 | 79514456 |
|   | 10 | 79476069 | 79484568 BC064113     | chr10 | 79484033 | 79484524 |
|   | 2  | 79439450 | 79447949 BC008560     | chr2  | 79443267 | 79444319 |
|   | 15 | 79355414 | 79366172 NM_152806    | chr15 | 79359123 | 79359985 |
|   | 10 | 79251734 | 79267645 NM_001077363 | chr10 | 79251828 | 79252335 |
| X |    | 79195622 | 79204121 NM_007868    | chrX  | 79202539 | 79203159 |
| X |    | 79195622 | 79204121 NM_007868    | chrX  | 79198802 | 79199394 |
|   | 10 | 79079324 | 79099386 NM_177613    | chr10 | 79096895 | 79097717 |
|   | 7  | 79001974 | 79010531 NM_178255    | chr7  | 79006255 | 79006807 |
|   | 7  | 79001974 | 79010531 NM_178255    | chr7  | 79005141 | 79005732 |
|   | 15 | 78988525 | 78998495 BC023356     | chr15 | 78990542 | 78991181 |
|   | 11 | 78798527 | 78807046 NM_010708    | chr11 | 78805612 | 78806798 |
|   | 15 | 78499123 | 78507622 BC079588     | chr15 | 78504613 | 78505450 |
|   | 7  | 78446343 | 78454842 BC006942     | chr7  | 78448091 | 78448767 |
|   | 15 | 78418302 | 78426874 NM_028195    | chr15 | 78423031 | 78423617 |
|   | 15 | 78379604 | 78396067 BC114397     | chr15 | 78381412 | 78382153 |
|   | 5  | 78336716 | 78345215 NM_011263    | chr5  | 78341470 | 78342035 |
|   | 18 | 78338711 | 78347210 AF367359     | chr18 | 78339944 | 78340667 |
|   | 6  | 78304218 | 78312768 NM_011259    | chr6  | 78304893 | 78305488 |
|   | 6  | 78294394 | 78302910 NM_011036    | chr6  | 78300389 | 78301068 |

|    |          |          |              |       |          |          |
|----|----------|----------|--------------|-------|----------|----------|
| 10 | 78276303 | 78284802 | NM_207571    | chr10 | 78282837 | 78283328 |
| 14 | 78154666 | 78163165 | NM_001024135 | chr14 | 78161429 | 78162382 |
| 11 | 78101036 | 78109535 | NM_001045522 | chr11 | 78103831 | 78104477 |
| 1  | 78077455 | 78086283 | NM_008781    | chr1  | 78078823 | 78079416 |
| 11 | 78071951 | 78080488 | NM_001002004 | chr11 | 78078433 | 78079257 |
| 11 | 77953288 | 77961787 | BC063099     | chr11 | 77959577 | 77960168 |
| 11 | 77925821 | 77934320 | NM_145430    | chr11 | 77929700 | 77930422 |
| X  | 77708342 | 77716841 | NM_173435    | chrX  | 77710195 | 77710957 |
| 12 | 77446422 | 77454921 | NM_153804    | chr12 | 77451140 | 77451751 |
| 18 | 77384294 | 77392802 | NM_153124    | chr18 | 77386668 | 77387218 |
| 12 | 77317016 | 77325742 | NM_008301    | chr12 | 77324422 | 77325183 |
| 5  | 77252655 | 77261224 | NM_011626    | chr5  | 77259583 | 77260188 |
| 10 | 77144360 | 77172719 | NM_010670    | chr10 | 77163655 | 77164384 |
| 10 | 77144360 | 77172719 | NM_010670    | chr10 | 77155400 | 77156034 |
| 10 | 77144360 | 77172719 | NM_010670    | chr10 | 77154711 | 77155312 |
| 10 | 77144360 | 77172719 | NM_010670    | chr10 | 77149693 | 77150337 |
| 14 | 77039545 | 77048198 | NM_011613    | chr14 | 77045192 | 77045786 |
| 2  | 76968976 | 76977475 | NM_001025576 | chr2  | 76974079 | 76974818 |
| 16 | 76890515 | 76899160 | NM_013918    | chr16 | 76899151 | 76899832 |
| 11 | 76892127 | 76900630 | NM_001012309 | chr11 | 76892673 | 76893345 |
| 15 | 76492935 | 76501434 | NM_033371    | chr15 | 76498890 | 76499481 |
| 15 | 76494704 | 76503203 | NM_007989    | chr15 | 76498890 | 76499481 |
| 15 | 76481821 | 76490410 | NM_010630    | chr15 | 76484126 | 76484865 |
| 15 | 76432310 | 76440846 | NM_053193    | chr15 | 76434584 | 76435235 |
| 6  | 76424743 | 76433293 | NM_153762    | chr6  | 76428945 | 76429617 |
| 11 | 76323115 | 76331614 | NM_198018    | chr11 | 76326121 | 76326843 |
| 16 | 76253230 | 76262507 | NM_173440    | chr16 | 76253323 | 76253921 |
| 16 | 76232706 | 76241205 | BC060232     | chr16 | 76235742 | 76236350 |
| 10 | 75999988 | 76008487 | NM_029661    | chr10 | 76000954 | 76001492 |
| 18 | 75820420 | 75828919 | NM_201354    | chr18 | 75826398 | 75827043 |
| 15 | 75815024 | 75825693 | NM_177922    | chr15 | 75821319 | 75821992 |
| 10 | 75691569 | 75700068 | NM_009115    | chr10 | 75693232 | 75693912 |
| 8  | 75613370 | 75621875 | NM_009188    | chr8  | 75619580 | 75620181 |
| 4  | 75602208 | 75611113 | NM_001014288 | chr4  | 75609675 | 75610280 |
| 9  | 75467425 | 75475926 | NM_009130    | chr9  | 75474091 | 75475515 |
| 11 | 75441183 | 75449749 | NM_008916    | chr11 | 75442343 | 75443030 |
| 1  | 75423419 | 75431945 | NM_009208    | chr1  | 75430324 | 75431002 |
| 11 | 75398302 | 75406847 | NM_008850    | chr11 | 75402060 | 75402665 |
| 17 | 75390867 | 75399423 | BC066069     | chr17 | 75396666 | 75397269 |
| 17 | 75390867 | 75399423 | BC066069     | chr17 | 75394608 | 75395230 |
| 1  | 75384329 | 75394789 | NM_178884    | chr1  | 75393248 | 75393901 |
| 10 | 75214582 | 75231130 | NM_133994    | chr10 | 75218522 | 75219046 |
| 1  | 75158992 | 75167528 | NM_009049    | chr1  | 75166240 | 75166816 |
| 11 | 75158693 | 75167293 | NM_177009    | chr11 | 75164003 | 75164749 |
| 11 | 75162000 | 75170505 | NM_026653    | chr11 | 75164003 | 75164749 |
| 7  | 75077709 | 75086208 | NM_153579    | chr7  | 75080478 | 75081272 |
| 7  | 74995187 | 75003686 | BC034651     | chr7  | 74996680 | 74997295 |

|   |    |          |          |              |       |          |          |
|---|----|----------|----------|--------------|-------|----------|----------|
|   | 1  | 74866307 | 74874806 | NM_001039495 | chr1  | 74872828 | 74873389 |
|   | 18 | 74835322 | 74843821 | M55253       | chr18 | 74842116 | 74842746 |
| X |    | 74834002 | 74842501 | BC032926     | chrX  | 74836750 | 74837626 |
|   | 15 | 74666375 | 74674874 | NM_001033229 | chr15 | 74665953 | 74666870 |
| X |    | 74616362 | 74624861 | BC116859     | chrX  | 74622530 | 74624204 |
| X |    | 74616362 | 74624861 | BC116859     | chrX  | 74618193 | 74619174 |
|   | 8  | 74598137 | 74611651 | NM_001029873 | chr8  | 74608608 | 74609236 |
|   | 8  | 74599521 | 74609816 | NM_010589    | chr8  | 74608608 | 74609236 |
|   | 11 | 74581058 | 74589628 | NM_026197    | chr11 | 74583225 | 74583997 |
|   | 11 | 74538019 | 74546865 | NM_013625    | chr11 | 74542197 | 74542899 |
|   | 13 | 74469480 | 74477979 | NM_182839    | chr13 | 74471780 | 74472458 |
|   | 13 | 74397840 | 74406339 | NM_001024508 | chr13 | 74405669 | 74406365 |
|   | 13 | 74401169 | 74409769 | NM_027182    | chr13 | 74405669 | 74406365 |
|   | 13 | 74397840 | 74406339 | NM_001024508 | chr13 | 74403262 | 74403873 |
|   | 13 | 74401169 | 74409769 | NM_027182    | chr13 | 74403262 | 74403873 |
|   | 2  | 74390244 | 74398746 | BC038626     | chr2  | 74392203 | 74392718 |
| X |    | 74341581 | 74350093 | NM_008754    | chrX  | 74342247 | 74343147 |
| X |    | 74235010 | 74243509 | NM_027768    | chrX  | 74239350 | 74241160 |
|   | 1  | 74205757 | 74220761 | NM_001039509 | chr1  | 74214254 | 74215043 |
|   | 1  | 74214677 | 74223873 | NM_146110    | chr1  | 74214254 | 74215043 |
|   | 13 | 74141502 | 74150024 | NM_001040692 | chr13 | 74144078 | 74144722 |
| X |    | 74103720 | 74112219 | NM_017471    | chrX  | 74110212 | 74111149 |
| X |    | 74046180 | 74054679 | NM_016979    | chrX  | 74047002 | 74047966 |
|   | 12 | 74036524 | 74045067 | NM_008612    | chr12 | 74042830 | 74043465 |
|   | 11 | 74020985 | 74029484 | NM_146711    | chr11 | 74024506 | 74025391 |
|   | 11 | 73965310 | 73973809 | NM_146708    | chr11 | 73972984 | 73973595 |
|   | 8  | 73819170 | 73832403 | NM_053248    | chr8  | 73832105 | 73832671 |
|   | 8  | 73828971 | 73837475 | NM_173013    | chr8  | 73832105 | 73832671 |
|   | 13 | 73791011 | 73799542 | NM_053163    | chr13 | 73793157 | 73793755 |
|   | 13 | 73791958 | 73800457 | NM_010888    | chr13 | 73793157 | 73793755 |
| X |    | 73757823 | 73766445 | NM_020601    | chrX  | 73764676 | 73765548 |
| X |    | 73757823 | 73766445 | NM_020601    | chrX  | 73760294 | 73760887 |
|   | 9  | 73726129 | 73736699 | BC030416     | chr9  | 73729270 | 73729881 |
|   | 13 | 73720801 | 73733346 | NM_018885    | chr13 | 73727504 | 73728094 |
|   | 8  | 73701843 | 73718475 | NM_008841    | chr8  | 73713840 | 73714471 |
|   | 18 | 73692790 | 73701291 | NM_001039214 | chr18 | 73699174 | 73699894 |
|   | 5  | 73565959 | 73574533 | NM_023429    | chr5  | 73568313 | 73568974 |
|   | 8  | 73539833 | 73548332 | NM_153074    | chr8  | 73545667 | 73546259 |
|   | 8  | 73539833 | 73548332 | NM_153074    | chr8  | 73543991 | 73544479 |
|   | 14 | 73485006 | 73493505 | BC006743     | chr14 | 73492879 | 73493329 |
|   | 8  | 73402388 | 73411934 | NM_178771    | chr8  | 73402683 | 73403287 |
|   | 14 | 73368995 | 73378465 | NM_172812    | chr14 | 73372374 | 73372967 |
|   | 11 | 73330893 | 73339392 | NM_146443    | chr11 | 73336584 | 73337779 |
|   | 2  | 73184716 | 73193237 | BC115698     | chr2  | 73191788 | 73192391 |
|   | 11 | 73077815 | 73086328 | NM_145099    | chr11 | 73085279 | 73086041 |
|   | 11 | 73048415 | 73056920 | NM_001001445 | chr11 | 73050365 | 73050989 |
|   | 8  | 73047300 | 73055799 | NM_007789    | chr8  | 73048028 | 73048640 |

|   |    |          |                       |       |          |          |
|---|----|----------|-----------------------|-------|----------|----------|
|   | 12 | 72987076 | 72995575 NM_181752    | chr12 | 72989480 | 72990062 |
|   | 11 | 72970720 | 72979219 NM_033321    | chr11 | 72975331 | 72975952 |
|   | 11 | 72900778 | 72909289 NM_008399    | chr11 | 72908229 | 72908814 |
|   | 15 | 72880567 | 72897262 NM_180662    | chr15 | 72885454 | 72886228 |
|   | 8  | 72825173 | 72833703 NM_032004    | chr8  | 72832433 | 72833027 |
|   | 8  | 72828136 | 72837701 NM_023312    | chr8  | 72832433 | 72833027 |
|   | 5  | 72793932 | 72809364 BC022652     | chr5  | 72801025 | 72801506 |
|   | 17 | 72735704 | 72745112 NM_027166    | chr17 | 72742739 | 72743413 |
|   | 17 | 72735704 | 72745112 NM_027166    | chr17 | 72739413 | 72740295 |
|   | 1  | 72638497 | 72646996 NM_009084    | chr1  | 72640845 | 72641441 |
|   | 18 | 72473911 | 72482410 NM_007831    | chr18 | 72479100 | 72479716 |
|   | 13 | 72426980 | 72435479 NM_010573    | chr13 | 72433809 | 72434502 |
|   | 2  | 72271047 | 72279557 NM_025866    | chr2  | 72271080 | 72271409 |
|   | 11 | 72245721 | 72260063 NM_016776    | chr11 | 72258898 | 72259493 |
|   | 7  | 72177609 | 72186108 NM_001024703 | chr7  | 72179332 | 72179919 |
|   | 8  | 72067443 | 72075942 NM_199364    | chr8  | 72072683 | 72073294 |
|   | 8  | 72011755 | 72020272 NM_007509    | chr8  | 72017498 | 72018190 |
|   | 8  | 72015650 | 72024211 NM_153054    | chr8  | 72017498 | 72018190 |
|   | 9  | 71907680 | 71916363 NM_011544    | chr9  | 71908240 | 71909178 |
|   | 11 | 71851205 | 71859704 NM_053245    | chr11 | 71852634 | 71853312 |
|   | 11 | 71852697 | 71861709 NM_144526    | chr11 | 71852634 | 71853312 |
|   | 5  | 71824841 | 71833340 NM_030052    | chr5  | 71825829 | 71826785 |
|   | 8  | 71803543 | 71812054 NM_008509    | chr8  | 71804547 | 71805448 |
| X |    | 71666764 | 71675263 NM_001039373 | chrX  | 71674616 | 71675154 |
| X |    | 71663418 | 71671919 NM_145956    | chrX  | 71669486 | 71670421 |
| X |    | 71666764 | 71675263 NM_001039373 | chrX  | 71669486 | 71670421 |
| X |    | 71663418 | 71671919 NM_145956    | chrX  | 71665863 | 71667011 |
| X |    | 71666764 | 71675263 NM_001039373 | chrX  | 71665863 | 71667011 |
| X |    | 71630262 | 71641036 NM_007977    | chrX  | 71639355 | 71640419 |
|   | 6  | 71559579 | 71568414 NM_173001    | chr6  | 71563146 | 71564466 |
|   | 15 | 71554883 | 71563507 BC125647     | chr15 | 71555814 | 71556413 |
|   | 6  | 71417403 | 71425902 NM_009543    | chr6  | 71424816 | 71425590 |
|   | 9  | 71388418 | 71396920 NM_001033208 | chr9  | 71396213 | 71396786 |
| X |    | 71342636 | 71351307 NM_001030307 | chrX  | 71349196 | 71349811 |
| X |    | 71335008 | 71343625 NM_181584    | chrX  | 71339160 | 71340042 |
|   | 17 | 71082835 | 71091334 AF286723     | chr17 | 71089536 | 71090400 |
|   | 13 | 71066028 | 71079811 BC026613     | chr13 | 71077345 | 71077938 |
|   | 13 | 71066028 | 71079811 BC026613     | chr13 | 71067903 | 71068506 |
|   | 11 | 70996563 | 71005062 DQ117590     | chr11 | 71003451 | 71004236 |
|   | 9  | 70959321 | 70967849 NM_022026    | chr9  | 70961649 | 70962690 |
|   | 17 | 70892856 | 70913390 NM_026064    | chr17 | 70900325 | 70900922 |
|   | 17 | 70892856 | 70913390 NM_026064    | chr17 | 70892869 | 70893465 |
| X |    | 70841048 | 70849547 NM_146398    | chrX  | 70845011 | 70845809 |
|   | 17 | 70753556 | 70762591 NM_009372    | chr17 | 70754465 | 70755168 |
|   | 10 | 70737093 | 70745592 NM_027184    | chr10 | 70743515 | 70744155 |
|   | 10 | 70737639 | 70746175 NM_134007    | chr10 | 70743515 | 70744155 |
| X |    | 70671332 | 70688024 NM_178590    | chrX  | 70681883 | 70682526 |

|   |    |          |          |              |       |          |          |
|---|----|----------|----------|--------------|-------|----------|----------|
| X |    | 70679382 | 70687881 | NM_008062    | chrX  | 70681883 | 70682526 |
| X |    | 70671332 | 70688024 | NM_178590    | chrX  | 70680931 | 70681534 |
| X |    | 70679382 | 70687881 | NM_008062    | chrX  | 70680931 | 70681534 |
| X |    | 70643495 | 70651994 | NM_025473    | chrX  | 70648918 | 70649472 |
| X |    | 70643495 | 70651994 | NM_025473    | chrX  | 70643406 | 70644243 |
|   | 2  | 70623820 | 70632319 | NM_172664    | chr2  | 70624268 | 70625260 |
| X |    | 70529470 | 70568289 | NM_177234    | chrX  | 70561640 | 70562148 |
| X |    | 70529470 | 70568289 | NM_177234    | chrX  | 70559897 | 70560482 |
| X |    | 70529470 | 70568289 | NM_177234    | chrX  | 70558947 | 70559562 |
| X |    | 70529470 | 70568289 | NM_177234    | chrX  | 70554023 | 70554773 |
| X |    | 70529470 | 70568289 | NM_177234    | chrX  | 70552300 | 70552896 |
| X |    | 70529470 | 70568289 | NM_177234    | chrX  | 70534090 | 70534684 |
| X |    | 70531851 | 70541053 | NM_027109    | chrX  | 70534090 | 70534684 |
|   | 9  | 70472203 | 70480842 | NM_007399    | chr9  | 70478783 | 70479372 |
|   | 11 | 70373076 | 70381711 | NM_001045964 | chr11 | 70380183 | 70380798 |
|   | 17 | 70323696 | 70332195 | NM_177639    | chr17 | 70331158 | 70331939 |
|   | 11 | 70273196 | 70282179 | NM_023158    | chr11 | 70279652 | 70280262 |
| X |    | 70274134 | 70282656 | NM_008363    | chrX  | 70279258 | 70279977 |
| X |    | 70274134 | 70282656 | NM_008363    | chrX  | 70276908 | 70277655 |
| X |    | 70181007 | 70189538 | NM_023132    | chrX  | 70182853 | 70183887 |
| X |    | 70161492 | 70169991 | NM_138630    | chrX  | 70165534 | 70166127 |
| X |    | 70074536 | 70083689 | NM_001029868 | chrX  | 70075558 | 70076186 |
| X |    | 70074536 | 70083689 | NM_001029868 | chrX  | 70074528 | 70075137 |
|   | 11 | 70034467 | 70062041 | NM_007528    | chr11 | 70042595 | 70043191 |
| X |    | 70033782 | 70042444 | NM_009279    | chrX  | 70039065 | 70039716 |
| X |    | 70037091 | 70045617 | NM_008323    | chrX  | 70039065 | 70039716 |
| X |    | 70033782 | 70042444 | NM_009279    | chrX  | 70034659 | 70036086 |
| X |    | 69963317 | 69971987 | NM_007435    | chrX  | 69967370 | 69967955 |
| X |    | 69965150 | 69974895 | NM_012060    | chrX  | 69967370 | 69967955 |
|   | 11 | 69801559 | 69819404 | NM_007888    | chr11 | 69808525 | 69809128 |
| X |    | 69749806 | 69758305 | NM_177236    | chrX  | 69753852 | 69754610 |
| X |    | 69684897 | 69694050 | NM_011907    | chrX  | 69691415 | 69692141 |
| X |    | 69657816 | 69666779 | NM_009566    | chrX  | 69662293 | 69662987 |
|   | 2  | 69656419 | 69665020 | NM_009278    | chr2  | 69661043 | 69661522 |
| X |    | 69603873 | 69612372 | BC019962     | chrX  | 69611015 | 69611660 |
| X |    | 69603873 | 69612372 | BC019962     | chrX  | 69609589 | 69610316 |
| X |    | 69589355 | 69597854 | NM_031494    | chrX  | 69595614 | 69596515 |
| X |    | 69589355 | 69597854 | NM_031494    | chrX  | 69593073 | 69593478 |
| X |    | 69540736 | 69549235 | NM_031493    | chrX  | 69548091 | 69548989 |
| X |    | 69540736 | 69549235 | NM_031493    | chrX  | 69545158 | 69546522 |
| X |    | 69540736 | 69549235 | NM_031493    | chrX  | 69542961 | 69543896 |
| X |    | 69540736 | 69549235 | NM_031493    | chrX  | 69542014 | 69542742 |
| X |    | 69513675 | 69524110 | NM_011727    | chrX  | 69518175 | 69519171 |
| X |    | 69513675 | 69524110 | NM_011727    | chrX  | 69515576 | 69517603 |
| X |    | 69513675 | 69524110 | NM_011727    | chrX  | 69513670 | 69514714 |
| X |    | 69493241 | 69501740 | NM_183094    | chrX  | 69493359 | 69495416 |
|   | 11 | 69476338 | 69494510 | NM_144958    | chr11 | 69486316 | 69487260 |



|   |    |          |          |              |       |          |          |
|---|----|----------|----------|--------------|-------|----------|----------|
| X |    | 69461069 | 69469609 | NM_021365    | chrX  | 69466712 | 69467331 |
| X |    | 69438936 | 69447441 | BC064787     | chrX  | 69445342 | 69446329 |
| X |    | 69438936 | 69447441 | BC064787     | chrX  | 69443832 | 69444738 |
| X |    | 69399671 | 69408170 | NM_001025384 | chrX  | 69407518 | 69408119 |
| X |    | 69399671 | 69408170 | NM_001025384 | chrX  | 69403792 | 69405493 |
|   | 11 | 69390176 | 69405584 | NM_011640    | chr11 | 69400761 | 69401394 |
| X |    | 69399671 | 69408170 | NM_001025384 | chrX  | 69400718 | 69401644 |
|   | 14 | 69385627 | 69394164 | NM_181345    | chr14 | 69387290 | 69388027 |
|   | 14 | 69374353 | 69383348 | NM_008004    | chr14 | 69376215 | 69376981 |
| X |    | 69363767 | 69378335 | NM_001025383 | chrX  | 69372570 | 69373168 |
| X |    | 69367923 | 69376422 | NM_001045539 | chrX  | 69372570 | 69373168 |
| X |    | 69363767 | 69378335 | NM_001025383 | chrX  | 69366739 | 69368618 |
| X |    | 69367923 | 69376422 | NM_001045539 | chrX  | 69366739 | 69368618 |
| X |    | 69363767 | 69378335 | NM_001025383 | chrX  | 69363963 | 69365122 |
| X |    | 69345296 | 69355761 | NM_011726    | chrX  | 69349816 | 69350795 |
| X |    | 69345296 | 69355761 | NM_011726    | chrX  | 69348265 | 69349273 |
| X |    | 69345296 | 69355761 | NM_011726    | chrX  | 69345361 | 69346182 |
| X |    | 69332699 | 69341198 | BC098242     | chrX  | 69338700 | 69339790 |
|   | 14 | 69306927 | 69315678 | NM_153136    | chr14 | 69314191 | 69314849 |
|   | 14 | 69306927 | 69315678 | NM_153136    | chr14 | 69309704 | 69310339 |
| X |    | 69243754 | 69253000 | NM_009549    | chrX  | 69252534 | 69253200 |
| X |    | 69243754 | 69253000 | NM_009549    | chrX  | 69243743 | 69244415 |
|   | 3  | 69212317 | 69221021 | NM_008467    | chr3  | 69215440 | 69216056 |
|   | 9  | 69208881 | 69217380 | BC018458     | chr9  | 69210962 | 69211745 |
| X |    | 69165241 | 69173881 | NM_010941    | chrX  | 69168867 | 69170075 |
| X |    | 69167073 | 69177064 | NM_019405    | chrX  | 69168867 | 69170075 |
|   | 14 | 69141592 | 69150091 | AF285586     | chr14 | 69144650 | 69145244 |
| X |    | 69116087 | 69124586 | NM_181855    | chrX  | 69120037 | 69120647 |
|   | 3  | 69086901 | 69095436 | NM_133786    | chr3  | 69092413 | 69093475 |
|   | 3  | 69089895 | 69098394 | NM_026641    | chr3  | 69092413 | 69093475 |
|   | 13 | 69058824 | 69067323 | BC119516     | chr13 | 69065098 | 69065741 |
|   | 13 | 69043617 | 69052146 | NM_027123    | chr13 | 69046941 | 69047524 |
|   | 13 | 69045588 | 69055492 | NM_172480    | chr13 | 69046941 | 69047524 |
|   | 2  | 68930662 | 68939185 | NM_181547    | chr2  | 68938408 | 68938866 |
|   | 11 | 68909129 | 68919216 | NM_011065    | chr11 | 68911853 | 68912642 |
| X |    | 68906265 | 68914906 | NM_008067    | chrX  | 68909453 | 68910113 |
|   | 10 | 68743014 | 68754273 | NM_007659    | chr10 | 68747198 | 68747814 |
|   | 3  | 68654363 | 68662935 | NM_013928    | chr3  | 68658245 | 68658927 |
|   | 10 | 68597909 | 68610532 | BC099973     | chr10 | 68610404 | 68611108 |
|   | 14 | 68453817 | 68462316 | BC006648     | chr14 | 68461620 | 68462286 |
|   | 14 | 68453817 | 68462316 | BC006648     | chr14 | 68455628 | 68456304 |
|   | 9  | 68446966 | 68455465 | NM_013646    | chr9  | 68448884 | 68449469 |
|   | 11 | 68397422 | 68412749 | NM_177779    | chr11 | 68410602 | 68411193 |
|   | 13 | 68356440 | 68364939 | BC048507     | chr13 | 68361874 | 68362465 |
|   | 2  | 68270296 | 68279107 | NM_016866    | chr2  | 68273455 | 68274305 |
|   | 14 | 68245130 | 68253629 | NM_173420    | chr14 | 68247342 | 68248196 |
| X |    | 68238595 | 68247094 | NM_007724    | chrX  | 68245898 | 68246547 |

|   |    |          |          |              |       |          |          |
|---|----|----------|----------|--------------|-------|----------|----------|
| X |    | 68238595 | 68247094 | NM_007724    | chrX  | 68244890 | 68245600 |
| X |    | 68238595 | 68247094 | NM_007724    | chrX  | 68241481 | 68242071 |
|   | 11 | 68199832 | 68209021 | NM_008744    | chr11 | 68200576 | 68201161 |
|   | 15 | 68086017 | 68094516 | NM_198644    | chr15 | 68090739 | 68091350 |
| X |    | 68063522 | 68072051 | BC094639     | chrX  | 68069697 | 68070623 |
| X |    | 68063522 | 68072051 | BC094639     | chrX  | 68068324 | 68069461 |
| X |    | 68063522 | 68072051 | BC094639     | chrX  | 68065836 | 68066974 |
|   | 3  | 67974149 | 67982684 | NM_177585    | chr3  | 67981338 | 67982241 |
| X |    | 67918323 | 67926822 | NM_010340    | chrX  | 67919902 | 67920489 |
| X |    | 67918323 | 67926822 | NM_010340    | chrX  | 67918402 | 67919043 |
|   | 18 | 67894183 | 67902792 | NM_001039088 | chr18 | 67899033 | 67899724 |
|   | 5  | 67881018 | 67890009 | NM_001033415 | chr5  | 67887962 | 67888681 |
| X |    | 67810510 | 67821105 | NM_008253    | chrX  | 67817885 | 67818658 |
| X |    | 67810510 | 67821105 | NM_008253    | chrX  | 67815211 | 67816022 |
| X |    | 67810510 | 67821105 | NM_008253    | chrX  | 67812767 | 67813355 |
|   | 8  | 67623244 | 67631770 | NM_025436    | chr8  | 67628279 | 67629040 |
|   | 17 | 67596210 | 67604731 | NM_008480    | chr17 | 67597636 | 67598230 |
|   | 16 | 67536647 | 67545146 | NM_178721    | chr16 | 67537452 | 67538069 |
|   | 13 | 67366280 | 67374816 | NM_025547    | chr13 | 67372211 | 67372857 |
|   | 11 | 67343193 | 67351772 | NM_008088    | chr11 | 67347853 | 67348471 |
|   | 11 | 67068845 | 67077344 | BC052786     | chr11 | 67073294 | 67074191 |
|   | 3  | 67066571 | 67075700 | NM_013665    | chr3  | 67071801 | 67072549 |
|   | 3  | 67067601 | 67076149 | NM_025822    | chr3  | 67071801 | 67072549 |
|   | 14 | 67031214 | 67039788 | NM_010910    | chr14 | 67033313 | 67033945 |
|   | 11 | 67010297 | 67018808 | NM_030679    | chr11 | 67017842 | 67018763 |
|   | 9  | 66845831 | 66854406 | NM_024427    | chr9  | 66850262 | 66850866 |
|   | 14 | 66715790 | 66724289 | BC016533     | chr14 | 66722318 | 66722935 |
|   | 9  | 66716332 | 66724831 | NM_173413    | chr9  | 66721849 | 66722614 |
| X |    | 66640469 | 66649023 | NM_026787    | chrX  | 66646053 | 66646752 |
| X |    | 66640469 | 66649023 | NM_026787    | chrX  | 66642024 | 66642656 |
|   | 15 | 66628679 | 66637178 | U29056       | chr15 | 66632001 | 66632342 |
|   | 1  | 66628068 | 66636600 | NM_025683    | chr1  | 66628866 | 66629464 |
| X |    | 66623041 | 66631640 | NM_010498    | chrX  | 66625771 | 66626432 |
|   | 5  | 66579030 | 66587529 | AY650904     | chr5  | 66581557 | 66582188 |
|   | 9  | 66506886 | 66515385 | NM_178396    | chr9  | 66513746 | 66514344 |
|   | 17 | 66422116 | 66430615 | NM_024448    | chr17 | 66422696 | 66423237 |
|   | 9  | 66388487 | 66397095 | NM_144937    | chr9  | 66389803 | 66390834 |
|   | 1  | 66291863 | 66300365 | BC051410     | chr1  | 66298974 | 66299558 |
|   | 14 | 66181402 | 66191721 | NM_010095    | chr14 | 66182782 | 66183479 |
|   | 1  | 65854798 | 65863318 | NM_027010    | chr1  | 65862047 | 65862643 |
|   | 18 | 65744672 | 65753171 | BC046409     | chr18 | 65746802 | 65747400 |
|   | 2  | 65640681 | 65649193 | NM_153409    | chr2  | 65646533 | 65647136 |
|   | 5  | 65612200 | 65620751 | NM_011258    | chr5  | 65618833 | 65619516 |
| X |    | 65614996 | 65623495 | NM_008032    | chrX  | 65615306 | 65616331 |
|   | 5  | 65501431 | 65509930 | BC046432     | chr5  | 65505727 | 65506444 |
|   | 7  | 65247690 | 65256189 | NM_009386    | chr7  | 65250285 | 65250877 |
|   | 9  | 65146638 | 65155137 | BC022772     | chr9  | 65146632 | 65147270 |

|   |    |          |          |              |       |          |          |
|---|----|----------|----------|--------------|-------|----------|----------|
|   | 5  | 65085474 | 65098369 | DQ981866     | chr5  | 65091779 | 65092444 |
|   | 5  | 65076658 | 65085190 | NM_008453    | chr5  | 65084332 | 65084928 |
|   | 5  | 65076658 | 65085190 | NM_008453    | chr5  | 65083437 | 65084198 |
| X |    | 65016504 | 65025003 | NM_174993    | chrX  | 65022069 | 65023075 |
|   | 1  | 64964524 | 64973024 | NM_027582    | chr1  | 64964897 | 64965509 |
| X |    | 64933220 | 64941864 | NM_008031    | chrX  | 64937835 | 64938983 |
| X |    | 64933220 | 64941864 | NM_008031    | chrX  | 64934051 | 64934947 |
|   | 11 | 64789286 | 64797791 | NM_023479    | chr11 | 64796017 | 64796607 |
|   | 4  | 64604535 | 64613034 | NM_021362    | chr4  | 64610420 | 64610942 |
|   | 18 | 64572559 | 64581058 | NM_007444    | chr18 | 64574483 | 64575534 |
|   | 18 | 64572559 | 64581058 | NM_007444    | chr18 | 64573505 | 64574316 |
|   | 9  | 64177689 | 64186195 | NM_172522    | chr9  | 64183914 | 64184526 |
| X |    | 64179602 | 64188115 | NM_025763    | chrX  | 64180851 | 64182393 |
|   | 7  | 64170518 | 64180985 | BC055074     | chr7  | 64171873 | 64172526 |
|   | 3  | 64163571 | 64172070 | NM_019918    | chr3  | 64170524 | 64171135 |
|   | 13 | 64159902 | 64168421 | NM_175494    | chr13 | 64160833 | 64161472 |
|   | 3  | 63936469 | 63945139 | NM_183191    | chr3  | 63939034 | 63939627 |
|   | 2  | 63896328 | 63904877 | NM_021716    | chr2  | 63898459 | 63899206 |
|   | 2  | 63896328 | 63904877 | NM_021716    | chr2  | 63897461 | 63898100 |
|   | 15 | 63887622 | 63896121 | NM_144846    | chr15 | 63892536 | 63893155 |
|   | 13 | 63844704 | 63853203 | BC032964     | chr13 | 63852495 | 63853102 |
|   | 2  | 62982627 | 62991126 | NM_133207    | chr2  | 62989575 | 62990177 |
|   | 14 | 62978720 | 62987219 | BC031365     | chr14 | 62978912 | 62979515 |
|   | 9  | 62942487 | 62951017 | NM_172446    | chr9  | 62944291 | 62944816 |
|   | 14 | 62939391 | 62947900 | NM_026359    | chr14 | 62941228 | 62942158 |
| X |    | 62907824 | 62916323 | NM_198863    | chrX  | 62915130 | 62915726 |
|   | 4  | 62836523 | 62851334 | NM_011016    | chr4  | 62844776 | 62845312 |
|   | 4  | 62824927 | 62833429 | NM_008768    | chr4  | 62832624 | 62833340 |
|   | 9  | 62332283 | 62341050 | NM_175484    | chr9  | 62337025 | 62337621 |
|   | 9  | 62332283 | 62341050 | NM_175484    | chr9  | 62334550 | 62335201 |
|   | 18 | 62302829 | 62311328 | NM_007420    | chr18 | 62302316 | 62303500 |
|   | 7  | 62296590 | 62305089 | NM_011746    | chr7  | 62299134 | 62300204 |
|   | 4  | 62154400 | 62162899 | BC033449     | chr4  | 62156167 | 62156582 |
|   | 11 | 62059179 | 62067763 | NM_007413    | chr11 | 62061259 | 62061875 |
|   | 14 | 61995101 | 62003600 | NM_001034910 | chr14 | 62000762 | 62001374 |
|   | 4  | 61841110 | 61849623 | NM_175090    | chr4  | 61847597 | 61848343 |
|   | 9  | 61822266 | 61830796 | NM_028748    | chr9  | 61829676 | 61830207 |
|   | 14 | 61712723 | 61721225 | NM_008715    | chr14 | 61713516 | 61714110 |
|   | 2  | 61506582 | 61515127 | NM_021526    | chr2  | 61512791 | 61513335 |
|   | 10 | 61460379 | 61468911 | BC087556     | chr10 | 61466305 | 61467091 |
|   | 10 | 61176722 | 61185303 | NM_207000    | chr10 | 61178826 | 61179506 |
|   | 4  | 61157932 | 61166497 | BC012259     | chr4  | 61159583 | 61160847 |
|   | 3  | 61084724 | 61093839 | NM_008772    | chr3  | 61090782 | 61091386 |
|   | 4  | 61003341 | 61011840 | BC037152     | chr4  | 61004913 | 61006013 |
|   | 10 | 60687191 | 60697764 | NM_011073    | chr10 | 60694979 | 60695572 |
|   | 4  | 60634199 | 60642721 | BC099597     | chr4  | 60636227 | 60637136 |
|   | 19 | 60633145 | 60641644 | NM_030197    | chr19 | 60634083 | 60634673 |

|   |    |          |                       |       |          |          |
|---|----|----------|-----------------------|-------|----------|----------|
|   | 11 | 60587737 | 60596597 NM_175491    | chr11 | 60592574 | 60593272 |
|   | 11 | 60590864 | 60599560 NM_009410    | chr11 | 60592574 | 60593272 |
| X |    | 60535027 | 60543661 NM_178740    | chrX  | 60541205 | 60542390 |
| X |    | 60535027 | 60543661 NM_178740    | chrX  | 60538142 | 60538751 |
|   | 2  | 60472001 | 60482905 NM_021359    | chr2  | 60476649 | 60477243 |
| X |    | 60428221 | 60436726 NM_027512    | chrX  | 60430915 | 60431566 |
|   | 8  | 60398018 | 60406586 NM_008252    | chr8  | 60404836 | 60405945 |
|   | 11 | 60279534 | 60288033 NM_010862    | chr11 | 60284006 | 60284715 |
|   | 10 | 60224325 | 60232938 NM_029770    | chr10 | 60227907 | 60228656 |
|   | 4  | 60161900 | 60170419 BC100586     | chr4  | 60165107 | 60165762 |
|   | 4  | 60161900 | 60170419 BC100586     | chr4  | 60163625 | 60164796 |
|   | 12 | 59927404 | 59936029 NM_009147    | chr12 | 59934372 | 59935255 |
|   | 4  | 59640824 | 59649350 NM_178164    | chr4  | 59644100 | 59644879 |
|   | 2  | 59637956 | 59646455 BC050873     | chr2  | 59638980 | 59639858 |
|   | 14 | 59326430 | 59334955 NM_028113    | chr14 | 59326985 | 59327620 |
|   | 11 | 59319608 | 59328416 NM_172941    | chr11 | 59326000 | 59326596 |
|   | 16 | 59156368 | 59164867 NM_207550    | chr16 | 59160466 | 59161128 |
|   | 16 | 59156368 | 59164867 NM_207550    | chr16 | 59157353 | 59158367 |
|   | 1  | 59100715 | 59112113 NM_145143    | chr1  | 59108303 | 59108977 |
|   | 11 | 59022416 | 59035720 NM_007476    | chr11 | 59028505 | 59029521 |
|   | 2  | 58955859 | 58964360 NM_026361    | chr2  | 58961448 | 58962168 |
|   | 2  | 58958967 | 58967466 BC062650     | chr2  | 58961448 | 58962168 |
|   | 11 | 58843205 | 58865307 BC044882     | chr11 | 58849784 | 58850748 |
|   | 9  | 58832063 | 58840578 NM_008684    | chr9  | 58831935 | 58832516 |
|   | 11 | 58773976 | 58782475 NM_031172    | chr11 | 58777400 | 58778441 |
|   | 6  | 58755467 | 58765777 NM_028705    | chr6  | 58763640 | 58764167 |
|   | 6  | 58755467 | 58765777 NM_028705    | chr6  | 58761529 | 58762296 |
|   | 10 | 58712725 | 58721229 NM_011030    | chr10 | 58719171 | 58720204 |
|   | 16 | 58664561 | 58674479 NM_171826    | chr16 | 58669440 | 58670257 |
|   | 11 | 58641351 | 58649850 NM_001011819 | chr11 | 58644113 | 58644856 |
|   | 13 | 58617989 | 58626500 NM_022317    | chr13 | 58621237 | 58621767 |
|   | 16 | 58606835 | 58615393 NM_007757    | chr16 | 58610448 | 58611144 |
|   | 4  | 58590923 | 58599422 U48235       | chr4  | 58591553 | 58592151 |
|   | 6  | 58520249 | 58528749 NM_011920    | chr6  | 58525697 | 58526466 |
|   | 6  | 58520249 | 58528749 NM_011920    | chr6  | 58524658 | 58525396 |
|   | 11 | 58511898 | 58520397 NM_146500    | chr11 | 58518061 | 58518863 |
|   | 1  | 58446966 | 58455473 NM_008765    | chr1  | 58454818 | 58455431 |
|   | 11 | 58450660 | 58459159 NM_001039047 | chr11 | 58452560 | 58453219 |
|   | 1  | 58446966 | 58455473 NM_008765    | chr1  | 58449920 | 58450711 |
|   | 1  | 58366051 | 58374634 NM_001042634 | chr1  | 58372209 | 58373082 |
|   | 11 | 58343766 | 58352265 NM_146879    | chr11 | 58345619 | 58346235 |
|   | 11 | 58316250 | 58331459 NM_001011861 | chr11 | 58317970 | 58318643 |
|   | 9  | 58280740 | 58290244 NM_176921    | chr9  | 58282280 | 58282892 |
|   | 15 | 58239565 | 58248271 NM_145959    | chr15 | 58246582 | 58247253 |
|   | 11 | 58231304 | 58239833 NM_027239    | chr11 | 58238214 | 58238806 |
|   | 13 | 58161277 | 58169802 NM_198004    | chr13 | 58168992 | 58169677 |
|   | 11 | 57997954 | 58006453 DQ508487     | chr11 | 57999555 | 58000141 |

|   |    |          |          |              |       |          |          |
|---|----|----------|----------|--------------|-------|----------|----------|
| X |    | 57964279 | 57972780 | NM_001018087 | chrX  | 57970732 | 57971465 |
|   | 1  | 57968515 | 57977049 | NM_009676    | chr1  | 57969012 | 57969981 |
| X |    | 57964279 | 57972780 | NM_001018087 | chrX  | 57966298 | 57966968 |
|   | 10 | 57836209 | 57844708 | NM_011240    | chr10 | 57841271 | 57841868 |
|   | 6  | 57771577 | 57780076 | NM_134183    | chr6  | 57777456 | 57778039 |
|   | 3  | 57737105 | 57745620 | NM_175095    | chr3  | 57739115 | 57739822 |
|   | 19 | 57700223 | 57708722 | BC050020     | chr19 | 57700652 | 57701820 |
|   | 10 | 57616384 | 57638017 | NM_001034869 | chr10 | 57624421 | 57624843 |
|   | 10 | 57467338 | 57475854 | NM_021272    | chr10 | 57471402 | 57472089 |
|   | 4  | 57463539 | 57472069 | BC093508     | chr4  | 57467927 | 57468533 |
|   | 3  | 57380303 | 57395848 | NM_008536    | chr3  | 57389429 | 57390045 |
|   | 10 | 57314396 | 57323009 | NM_008863    | chr10 | 57321024 | 57321639 |
|   | 6  | 57181727 | 57190226 | NM_053236    | chr6  | 57188132 | 57188598 |
| X |    | 57151371 | 57159870 | NM_009237    | chrX  | 57155470 | 57156490 |
|   | 17 | 56928788 | 56937334 | NM_134125    | chr17 | 56933584 | 56934287 |
|   | 9  | 56868513 | 56881799 | NM_011378    | chr9  | 56873932 | 56874547 |
| X |    | 56748076 | 56756596 | NM_001037863 | chrX  | 56753584 | 56754453 |
| X |    | 56748076 | 56756596 | NM_001037863 | chrX  | 56751434 | 56753329 |
|   | 13 | 56605325 | 56621730 | NM_009369    | chr13 | 56616055 | 56616688 |
|   | 8  | 56530025 | 56538524 | BC023461     | chr8  | 56533545 | 56534159 |
| X |    | 56340248 | 56348747 | NM_007979    | chrX  | 56346875 | 56347488 |
| X |    | 56340248 | 56348747 | NM_007979    | chrX  | 56346057 | 56346672 |
| X |    | 56340248 | 56348747 | NM_007979    | chrX  | 56344878 | 56345493 |
|   | 12 | 56311018 | 56319527 | NM_011968    | chr12 | 56311918 | 56312746 |
|   | 17 | 56143625 | 56152191 | NM_011483    | chr17 | 56145718 | 56146819 |
|   | 14 | 56076832 | 56093687 | NM_001010937 | chr14 | 56092331 | 56092862 |
|   | 14 | 56076832 | 56093687 | NM_001010937 | chr14 | 56076826 | 56077427 |
|   | 10 | 56059733 | 56068302 | NM_010288    | chr10 | 56065659 | 56066303 |
|   | 17 | 55919087 | 55930220 | NM_025836    | chr17 | 55926951 | 55927570 |
|   | 17 | 55884531 | 55893047 | NM_010192    | chr17 | 55891587 | 55892272 |
|   | 16 | 55761106 | 55769805 | NM_030612    | chr16 | 55763232 | 55764254 |
|   | 17 | 55700597 | 55721239 | NM_020568    | chr17 | 55705926 | 55706529 |
|   | 17 | 55700597 | 55721239 | NM_020568    | chr17 | 55704241 | 55704855 |
|   | 7  | 55668135 | 55676634 | BC027075     | chr7  | 55668126 | 55668777 |
|   | 17 | 55596362 | 55604878 | NM_145934    | chr17 | 55602388 | 55602962 |
|   | 17 | 55596524 | 55605118 | NM_026530    | chr17 | 55602388 | 55602962 |
| X |    | 55478721 | 55487220 | NM_010200    | chrX  | 55485313 | 55486154 |
| X |    | 55478721 | 55487220 | NM_010200    | chrX  | 55484653 | 55485260 |
| X |    | 55478721 | 55487220 | NM_010200    | chrX  | 55478816 | 55479598 |
|   | 9  | 55333344 | 55341843 | NM_027397    | chr9  | 55335925 | 55336589 |
|   | 17 | 55303220 | 55311719 | NM_028370    | chr17 | 55306710 | 55307318 |
|   | 3  | 55140348 | 55148984 | NM_007628    | chr3  | 55145827 | 55146395 |
|   | 3  | 55140348 | 55148984 | NM_007628    | chr3  | 55143948 | 55144717 |
|   | 13 | 55100405 | 55115917 | NM_011307    | chr13 | 55110935 | 55111520 |
|   | 6  | 55060039 | 55068550 | NM_009953    | chr6  | 55064710 | 55065259 |
|   | 11 | 55051218 | 55059717 | AF453743     | chr11 | 55057138 | 55057861 |
|   | 14 | 55054061 | 55062645 | NM_007800    | chr14 | 55055577 | 55056175 |

|   |    |          |                       |       |          |          |
|---|----|----------|-----------------------|-------|----------|----------|
|   | 11 | 55041793 | 55050292 NM_153139    | chr11 | 55045070 | 55045674 |
|   | 6  | 55044992 | 55053563 AY445512     | chr6  | 55045058 | 55045666 |
|   | 3  | 54893172 | 54905143 NM_133231    | chr3  | 54898485 | 54899192 |
|   | 9  | 54844167 | 54852727 NM_148944    | chr9  | 54851923 | 54852620 |
|   | 9  | 54746592 | 54755135 NM_145229    | chr9  | 54751234 | 54751831 |
|   | 14 | 54664660 | 54673546 NM_019984    | chr14 | 54670490 | 54671081 |
|   | 13 | 54597173 | 54605696 NM_178605    | chr13 | 54604227 | 54604784 |
|   | 14 | 54585332 | 54603877 NM_024267    | chr14 | 54588138 | 54588746 |
|   | 14 | 54536802 | 54551172 NM_011190    | chr14 | 54543464 | 54544172 |
|   | 14 | 54539861 | 54548360 NM_194346    | chr14 | 54543464 | 54544172 |
|   | 9  | 54500539 | 54509038 BC022948     | chr9  | 54504585 | 54505183 |
|   | 9  | 54491521 | 54500195 NM_021422    | chr9  | 54493868 | 54495025 |
|   | 14 | 54458694 | 54467930 NM_009947    | chr14 | 54465181 | 54465775 |
| X |    | 54371412 | 54379926 NM_009575    | chrX  | 54379094 | 54379899 |
| X |    | 54371412 | 54379926 NM_009575    | chrX  | 54374756 | 54377109 |
|   | 9  | 54331121 | 54339624 NM_173778    | chr9  | 54336907 | 54337592 |
|   | 11 | 54141221 | 54150176 NM_001033597 | chr11 | 54146176 | 54146775 |
|   | 19 | 53950728 | 53963259 D86344       | chr19 | 53955924 | 53956539 |
|   | 18 | 53867417 | 53875922 NM_178686    | chr18 | 53868778 | 53869369 |
| X |    | 53848002 | 53856501 NM_001033360 | chrX  | 53853317 | 53853944 |
| X |    | 53683014 | 53691513 NM_152801    | chrX  | 53689071 | 53689667 |
| X |    | 53683014 | 53691513 NM_152801    | chrX  | 53688252 | 53688871 |
| X |    | 53683014 | 53691513 NM_152801    | chrX  | 53683951 | 53685632 |
|   | 11 | 53607501 | 53616417 NM_008390    | chr11 | 53616378 | 53617055 |
|   | 14 | 53593024 | 53601523 NM_199470    | chr14 | 53599370 | 53600070 |
| X |    | 53552880 | 53561426 NM_011616    | chrX  | 53556926 | 53557788 |
| X |    | 53428890 | 53437389 NM_133251    | chrX  | 53431277 | 53431964 |
| X |    | 53394399 | 53402898 NM_028242    | chrX  | 53400563 | 53401452 |
| X |    | 53383858 | 53392376 NM_009766    | chrX  | 53390271 | 53391040 |
| X |    | 53383858 | 53392376 NM_009766    | chrX  | 53386277 | 53386980 |
|   | 10 | 53316355 | 53324854 NM_027830    | chr10 | 53320823 | 53321468 |
|   | 19 | 53264111 | 53272610 AF100425     | chr19 | 53271245 | 53271806 |
|   | 14 | 53238044 | 53246543 NM_010991    | chr14 | 53239547 | 53240148 |
| X |    | 53163222 | 53175110 NM_177293    | chrX  | 53167566 | 53168532 |
| X |    | 53120472 | 53137271 NM_001077362 | chrX  | 53120667 | 53121351 |
| X |    | 53095128 | 53103627 U41739       | chrX  | 53101959 | 53103005 |
| X |    | 53095128 | 53103627 U41739       | chrX  | 53095347 | 53096065 |
| X |    | 52950638 | 52959137 NM_172780    | chrX  | 52953799 | 52954612 |
| X |    | 52950638 | 52959137 NM_172780    | chrX  | 52952961 | 52953522 |
| X |    | 52942204 | 52950730 NM_146234    | chrX  | 52942652 | 52943253 |
| X |    | 52795641 | 52804168 NM_172779    | chrX  | 52800597 | 52801705 |
| X |    | 52795641 | 52804168 NM_172779    | chrX  | 52797783 | 52798388 |
|   | 1  | 52783591 | 52792090 NM_146108    | chr1  | 52790832 | 52791419 |
| X |    | 52715351 | 52723898 BC052359     | chrX  | 52723109 | 52724246 |
|   | 5  | 52661390 | 52669889 NM_001007590 | chr5  | 52663359 | 52664104 |
|   | 18 | 52652461 | 52661072 NM_010728    | chr18 | 52652899 | 52653493 |
|   | 6  | 52637326 | 52645885 NM_025816    | chr6  | 52642494 | 52643103 |

|   |    |          |          |              |       |          |          |
|---|----|----------|----------|--------------|-------|----------|----------|
|   | 11 | 52602129 | 52610628 | NM_177059    | chr11 | 52610032 | 52610593 |
|   | 12 | 52508977 | 52517574 | NM_007728    | chr12 | 52515068 | 52515737 |
|   | 6  | 52128026 | 52170522 | NM_008263    | chr6  | 52146111 | 52146715 |
|   | 6  | 52128026 | 52170522 | NM_008263    | chr6  | 52128260 | 52128857 |
|   | 11 | 52069432 | 52077993 | NM_011543    | chr11 | 52076188 | 52076835 |
|   | 3  | 51941713 | 51950543 | NM_001004176 | chr3  | 51950444 | 51950937 |
|   | 11 | 51841303 | 51849810 | NM_009458    | chr11 | 51844292 | 51844903 |
|   | 11 | 51841664 | 51850271 | NM_153785    | chr11 | 51844292 | 51844903 |
|   | 5  | 51839565 | 51848109 | NM_008904    | chr5  | 51843559 | 51844152 |
|   | 3  | 51743122 | 51751621 | NM_174995    | chr3  | 51745988 | 51746606 |
|   | 11 | 51422226 | 51430725 | NM_028398    | chr11 | 51424469 | 51424849 |
|   | 3  | 51408875 | 51419966 | NM_023502    | chr3  | 51409727 | 51410331 |
|   | 6  | 51393943 | 51402771 | NM_007624    | chr6  | 51397596 | 51398220 |
|   | 6  | 51396856 | 51405477 | NM_016806    | chr6  | 51397596 | 51398220 |
|   | 6  | 51393943 | 51402771 | NM_007624    | chr6  | 51395277 | 51395980 |
|   | 14 | 51366344 | 51374843 | NM_020514    | chr14 | 51368913 | 51369457 |
|   | 10 | 51360225 | 51376432 | NM_177306    | chr10 | 51366302 | 51366898 |
|   | 14 | 51269496 | 51277995 | NM_001012269 | chr14 | 51271640 | 51272397 |
|   | 11 | 51110874 | 51119373 | BC002220     | chr11 | 51118321 | 51119255 |
|   | 14 | 50929492 | 50948684 | NM_027248    | chr14 | 50942276 | 50943105 |
|   | 9  | 50862231 | 50870746 | NM_019493    | chr9  | 50864463 | 50865072 |
|   | 14 | 50809591 | 50818090 | NM_001039676 | chr14 | 50811023 | 50811833 |
|   | 11 | 50757079 | 50765584 | NM_001044697 | chr11 | 50761843 | 50762450 |
|   | 15 | 50710381 | 50726115 | NM_032000    | chr15 | 50723481 | 50724180 |
|   | 10 | 50578066 | 50586772 | NM_011376    | chr10 | 50584577 | 50585227 |
|   | 6  | 50523677 | 50532179 | NM_027564    | chr6  | 50524607 | 50525265 |
|   | 9  | 50514468 | 50530059 | NM_133981    | chr9  | 50522824 | 50523598 |
|   | 9  | 50517857 | 50526382 | NM_023483    | chr9  | 50522824 | 50523598 |
|   | 6  | 50493561 | 50509848 | NM_007808    | chr6  | 50496351 | 50497111 |
|   | 11 | 50063056 | 50078226 | NM_145926    | chr11 | 50069958 | 50070606 |
| X |    | 49989821 | 49998333 | NM_011725    | chrX  | 49991328 | 49992039 |
|   | 18 | 49952327 | 49960826 | AY590892     | chr18 | 49953310 | 49953921 |
| X |    | 49862536 | 49871035 | NM_001018063 | chrX  | 49867922 | 49868643 |
| X |    | 49862536 | 49871035 | NM_001018063 | chrX  | 49860353 | 49862556 |
| X |    | 49835810 | 49844309 | NM_024170    | chrX  | 49836757 | 49837370 |
| X |    | 49796549 | 49805160 | NM_028375    | chrX  | 49802264 | 49802861 |
|   | 7  | 49621174 | 49630077 | NM_016865    | chr7  | 49623294 | 49623930 |
|   | 13 | 49613983 | 49623591 | NM_008760    | chr13 | 49622061 | 49622683 |
| X |    | 49612574 | 49621119 | NM_027409    | chrX  | 49620100 | 49621074 |
| X |    | 49511148 | 49519658 | NM_030167    | chrX  | 49511947 | 49512933 |
| X |    | 49512060 | 49520559 | NM_028671    | chrX  | 49511947 | 49512933 |
|   | 11 | 49389172 | 49397671 | NM_146469    | chr11 | 49397220 | 49397599 |
| X |    | 49356519 | 49365032 | NM_019538    | chrX  | 49362845 | 49363430 |
|   | 11 | 49351041 | 49359540 | NM_146472    | chr11 | 49357342 | 49358064 |
| X |    | 49356519 | 49365032 | NM_019538    | chrX  | 49357237 | 49357874 |
|   | 14 | 49329497 | 49337996 | NM_146420    | chr14 | 49330693 | 49331551 |
|   | 6  | 49242939 | 49251490 | NM_175098    | chr6  | 49245074 | 49245653 |

|   |    |          |          |              |       |          |          |
|---|----|----------|----------|--------------|-------|----------|----------|
|   | 13 | 49219644 | 49233963 | NM_026738    | chr13 | 49233109 | 49233631 |
| X |    | 49226705 | 49235328 | NM_013556    | chrX  | 49233081 | 49233926 |
| X |    | 49226705 | 49235328 | NM_013556    | chrX  | 49231946 | 49232684 |
|   | 14 | 49218782 | 49227281 | NM_146663    | chr14 | 49222893 | 49223502 |
|   | 14 | 49201723 | 49210222 | NM_146665    | chr14 | 49207485 | 49208124 |
| X |    | 49150867 | 49159434 | NM_027642    | chrX  | 49151147 | 49151753 |
|   | 11 | 49130720 | 49139223 | NM_146470    | chr11 | 49137973 | 49138677 |
|   | 11 | 49117573 | 49126072 | NM_146471    | chr11 | 49125140 | 49125739 |
|   | 11 | 49117573 | 49126072 | NM_146471    | chr11 | 49123760 | 49124364 |
|   | 11 | 49027969 | 49036512 | NM_172793    | chr11 | 49028409 | 49028945 |
|   | 14 | 48954952 | 48963451 | NM_146317    | chr14 | 48959361 | 48960392 |
|   | 16 | 48911062 | 48919716 | BC117954     | chr16 | 48915043 | 48915629 |
|   | 6  | 48910447 | 48919075 | NM_172888    | chr6  | 48910440 | 48911317 |
|   | 11 | 48892166 | 48900665 | NM_173434    | chr11 | 48895397 | 48896074 |
|   | 7  | 48709173 | 48722054 | NM_013808    | chr7  | 48719101 | 48719688 |
|   | 9  | 48714255 | 48722922 | NM_020274    | chr9  | 48718066 | 48718821 |
|   | 6  | 48662633 | 48678381 | NM_175035    | chr6  | 48676206 | 48676798 |
|   | 11 | 48667432 | 48676035 | NM_013812    | chr11 | 48673987 | 48674680 |
|   | 11 | 48637783 | 48646297 | NM_008143    | chr11 | 48638312 | 48638931 |
|   | 13 | 48635011 | 48643517 | NM_207232    | chr13 | 48637188 | 48637792 |
|   | 4  | 48487525 | 48497163 | BC006867     | chr4  | 48493194 | 48493813 |
|   | 9  | 48241409 | 48249926 | BC011344     | chr9  | 48244974 | 48246107 |
|   | 9  | 48244747 | 48253272 | NM_144948    | chr9  | 48244974 | 48246107 |
|   | 8  | 48232590 | 48241107 | NM_008391    | chr8  | 48235404 | 48235996 |
|   | 9  | 48230015 | 48238578 | NM_024233    | chr9  | 48234812 | 48235385 |
| X |    | 48213175 | 48223399 | BC109337     | chrX  | 48216734 | 48217353 |
|   | 18 | 48164666 | 48174573 | NM_001025388 | chr18 | 48171961 | 48173295 |
| X |    | 48035511 | 48048380 | NM_031388    | chrX  | 48045454 | 48046210 |
| X |    | 47922597 | 47932229 | NM_001077202 | chrX  | 47922586 | 47923373 |
|   | 19 | 47912856 | 47926072 | NM_026619    | chr19 | 47914268 | 47915166 |
|   | 17 | 47895706 | 47904295 | NM_009694    | chr17 | 47903106 | 47903711 |
|   | 17 | 47869647 | 47878890 | NM_207219    | chr17 | 47876800 | 47877367 |
|   | 17 | 47872776 | 47881332 | NM_010913    | chr17 | 47876800 | 47877367 |
|   | 19 | 47626989 | 47635949 | NM_009289    | chr19 | 47633987 | 47634930 |
|   | 14 | 47582324 | 47595457 | NM_144841    | chr14 | 47593989 | 47594723 |
|   | 4  | 47489761 | 47498300 | NM_024171    | chr4  | 47489763 | 47490353 |
| X |    | 47447960 | 47456617 | NM_134163    | chrX  | 47450490 | 47452582 |
| X |    | 47447960 | 47456617 | NM_134163    | chrX  | 47448121 | 47449230 |
| X |    | 47406757 | 47415256 | AF466292     | chrX  | 47414029 | 47414678 |
| X |    | 47406757 | 47415256 | AF466292     | chrX  | 47412476 | 47413087 |
| X |    | 47260107 | 47268645 | NM_172413    | chrX  | 47263723 | 47264694 |
| X |    | 47260107 | 47268645 | NM_172413    | chrX  | 47260648 | 47262946 |
|   | 17 | 47242935 | 47251455 | NM_011549    | chr17 | 47244445 | 47244969 |
|   | 19 | 47175600 | 47184586 | BC051231     | chr19 | 47177032 | 47177644 |
| X |    | 47080063 | 47088562 | NM_133729    | chrX  | 47087063 | 47087664 |
| X |    | 47080063 | 47088562 | NM_133729    | chrX  | 47081396 | 47082032 |
|   | 19 | 46936319 | 46944818 | BC006028     | chr19 | 46937216 | 46937841 |



|   |    |          |                       |       |          |          |
|---|----|----------|-----------------------|-------|----------|----------|
|   | 17 | 46771140 | 46779685 NM_172622    | chr17 | 46778763 | 46779597 |
|   | 17 | 46771140 | 46779685 NM_172622    | chr17 | 46777902 | 46778537 |
| X |    | 46668710 | 46677209 NM_146292    | chrX  | 46676508 | 46677079 |
|   | 7  | 46598087 | 46617022 NM_011316    | chr7  | 46610338 | 46611314 |
|   | 13 | 46507060 | 46515618 NM_026056    | chr13 | 46513531 | 46514128 |
|   | 19 | 46404191 | 46412744 NM_029186    | chr19 | 46410899 | 46411541 |
|   | 4  | 46359294 | 46367793 NM_183298    | chr4  | 46366336 | 46367160 |
|   | 11 | 46274397 | 46282896 NM_025426    | chr11 | 46275813 | 46276831 |
| X |    | 46252363 | 46260862 NM_146390    | chrX  | 46257876 | 46258466 |
| X |    | 46252363 | 46260862 NM_146390    | chrX  | 46256761 | 46257456 |
| X |    | 46252363 | 46260862 NM_146390    | chrX  | 46253091 | 46253741 |
|   | 4  | 46214889 | 46223411 NM_011728    | chr4  | 46216165 | 46216909 |
|   | 17 | 46134947 | 46150095 NM_027910    | chr17 | 46148607 | 46149199 |
| X |    | 46128529 | 46137028 NM_001011794 | chrX  | 46136237 | 46136856 |
| X |    | 46128529 | 46137028 NM_001011794 | chrX  | 46129946 | 46130579 |
| X |    | 46030334 | 46048372 NM_177591    | chrX  | 46034487 | 46035311 |
|   | 9  | 46013603 | 46026677 NM_080434    | chr9  | 46019430 | 46020131 |
|   | 14 | 45984881 | 45993380 BC049740     | chr14 | 45992783 | 45993318 |
| X |    | 45970127 | 45978626 NM_207631    | chrX  | 45970557 | 45971207 |
| X |    | 45922131 | 45930630 NM_207240    | chrX  | 45927719 | 45928467 |
| X |    | 45922131 | 45930630 NM_207240    | chrX  | 45925377 | 45926238 |
|   | 17 | 45843929 | 45852428 NM_207671    | chr17 | 45847311 | 45847945 |
|   | 7  | 45759117 | 45767616 NM_144801    | chr7  | 45763926 | 45764510 |
|   | 9  | 45757873 | 45766372 NM_027498    | chr9  | 45763245 | 45763885 |
|   | 14 | 45741550 | 45758367 NM_022023    | chr14 | 45755861 | 45756451 |
|   | 14 | 45748108 | 45756620 NM_026832    | chr14 | 45755861 | 45756451 |
|   | 14 | 45707695 | 45716215 NM_009919    | chr14 | 45711034 | 45711560 |
|   | 7  | 45690230 | 45704986 NM_145963    | chr7  | 45695052 | 45695635 |
|   | 7  | 45679421 | 45688332 NM_011181    | chr7  | 45685466 | 45686082 |
|   | 7  | 45679421 | 45688332 NM_011181    | chr7  | 45679840 | 45680435 |
|   | 7  | 45580113 | 45591761 NM_001033170 | chr7  | 45583295 | 45584057 |
|   | 7  | 45580199 | 45599855 NM_020011    | chr7  | 45583295 | 45584057 |
| X |    | 45530344 | 45538869 NM_145951    | chrX  | 45532736 | 45533795 |
| X |    | 45530344 | 45538869 NM_145951    | chrX  | 45530932 | 45531542 |
|   | 16 | 45448641 | 45457147 NM_198106    | chr16 | 45452945 | 45453540 |
|   | 1  | 45445069 | 45453828 NM_007737    | chr1  | 45448441 | 45449041 |
|   | 7  | 45418086 | 45440904 NM_009737    | chr7  | 45435855 | 45436558 |
|   | 7  | 45418086 | 45440904 NM_009737    | chr7  | 45426731 | 45427311 |
|   | 7  | 45388372 | 45400534 NM_148927    | chr7  | 45391338 | 45392027 |
|   | 7  | 45391756 | 45400255 NM_008654    | chr7  | 45391338 | 45392027 |
|   | 4  | 45339200 | 45347699 NM_025513    | chr4  | 45339329 | 45339927 |
|   | 7  | 45246295 | 45254794 BC002169     | chr7  | 45249772 | 45250498 |
|   | 7  | 45229275 | 45237774 NM_016664    | chr7  | 45230246 | 45230915 |
|   | 7  | 45070435 | 45088638 NM_201374    | chr7  | 45080051 | 45080764 |
|   | 7  | 45077795 | 45087752 NM_011565    | chr7  | 45080051 | 45080764 |
|   | 12 | 45070979 | 45086354 NM_013760    | chr12 | 45072757 | 45073399 |
|   | 4  | 44939253 | 44949241 NM_138590    | chr4  | 44947161 | 44947915 |

|   |    |          |                       |       |          |          |
|---|----|----------|-----------------------|-------|----------|----------|
| X |    | 44916606 | 44925105 NM_181751    | chrX  | 44923239 | 44923897 |
| X |    | 44916606 | 44925105 NM_181751    | chrX  | 44919318 | 44920155 |
| X |    | 44916606 | 44925105 NM_181751    | chrX  | 44917942 | 44918547 |
| X |    | 44916606 | 44925105 NM_181751    | chrX  | 44916445 | 44917119 |
|   | 7  | 44899937 | 44908436 BC025846     | chr7  | 44903334 | 44903947 |
| X |    | 44862205 | 44871123 NM_011398    | chrX  | 44870250 | 44870836 |
| X |    | 44862205 | 44871123 NM_011398    | chrX  | 44868723 | 44869813 |
|   | 8  | 44803268 | 44818725 NM_009556    | chr8  | 44804140 | 44804860 |
|   | 7  | 44757910 | 44779116 NM_029365    | chr7  | 44760439 | 44761133 |
|   | 7  | 44758135 | 44768808 BC045601     | chr7  | 44760439 | 44761133 |
| X |    | 44755517 | 44764053 NM_012019    | chrX  | 44758173 | 44759079 |
| X |    | 44758097 | 44766663 NM_011228    | chrX  | 44758173 | 44759079 |
|   | 7  | 44711269 | 44727885 NM_026270    | chr7  | 44717561 | 44718433 |
|   | 7  | 44714622 | 44723121 NM_001042655 | chr7  | 44717561 | 44718433 |
| X |    | 44385154 | 44393668 NM_028773    | chrX  | 44389605 | 44390691 |
|   | 7  | 44327477 | 44338692 NM_026690    | chr7  | 44336079 | 44336698 |
|   | 7  | 44304529 | 44313028 NM_198250    | chr7  | 44308209 | 44309139 |
|   | 11 | 44301754 | 44310796 BC094051     | chr11 | 44305966 | 44306822 |
|   | 9  | 44244131 | 44262370 NM_030256    | chr9  | 44255879 | 44256482 |
|   | 9  | 44244131 | 44262370 NM_030256    | chr9  | 44246135 | 44246712 |
|   | 19 | 44197245 | 44205754 BC065806     | chr19 | 44201216 | 44201805 |
|   | 9  | 44143171 | 44151849 NM_008063    | chr9  | 44144335 | 44144931 |
|   | 14 | 44138648 | 44148205 NM_172597    | chr14 | 44144147 | 44144807 |
| X |    | 44134647 | 44143179 NM_053123    | chrX  | 44142262 | 44143079 |
|   | 7  | 43857921 | 43866420 NM_010640    | chr7  | 43861753 | 43862379 |
|   | 4  | 43840034 | 43848538 NM_019474    | chr4  | 43842830 | 43843467 |
|   | 7  | 43795813 | 43804312 NM_174865    | chr7  | 43801785 | 43802395 |
|   | 4  | 43742298 | 43753633 NM_027789    | chr4  | 43750116 | 43750701 |
|   | 4  | 43672153 | 43683550 NM_001007463 | chr4  | 43681127 | 43681825 |
|   | 4  | 43679020 | 43687542 BC092136     | chr4  | 43681127 | 43681825 |
|   | 4  | 43508477 | 43516996 NM_001037913 | chr4  | 43516008 | 43516595 |
|   | 4  | 43511481 | 43526730 NM_001013377 | chr4  | 43516008 | 43516595 |
|   | 17 | 43410054 | 43418959 NM_030598    | chr17 | 43418394 | 43418919 |
|   | 17 | 43410054 | 43418959 NM_030598    | chr17 | 43414540 | 43415154 |
|   | 13 | 43403348 | 43411847 NM_023554    | chr13 | 43409071 | 43409999 |
|   | 7  | 43292008 | 43314544 NM_177693    | chr7  | 43311796 | 43312312 |
|   | 15 | 43301303 | 43309844 NM_025736    | chr15 | 43307478 | 43308359 |
|   | 10 | 43261584 | 43270103 NM_009846    | chr10 | 43268651 | 43269443 |
|   | 6  | 43140490 | 43148989 NM_146369    | chr6  | 43143617 | 43144365 |
|   | 17 | 43127571 | 43136237 NM_028711    | chr17 | 43134978 | 43135587 |
|   | 17 | 43124480 | 43133088 NM_018887    | chr17 | 43125890 | 43126489 |
|   | 17 | 43090855 | 43099354 NM_198418    | chr17 | 43090850 | 43092028 |
|   | 6  | 43039351 | 43047850 NM_146655    | chr6  | 43044219 | 43044805 |
|   | 6  | 43039351 | 43047850 NM_146655    | chr6  | 43039684 | 43040135 |
|   | 9  | 42853974 | 42864234 NM_027144    | chr9  | 42855592 | 42856570 |
|   | 4  | 42775779 | 42784278 NM_011888    | chr4  | 42776780 | 42777377 |
|   | 4  | 42775779 | 42784278 NM_011888    | chr4  | 42775851 | 42776537 |

|   |    |          |                       |       |          |          |
|---|----|----------|-----------------------|-------|----------|----------|
|   | 6  | 42741080 | 42749579 NM_146445    | chr6  | 42742467 | 42743342 |
|   | 13 | 42714553 | 42723052 NM_001005740 | chr13 | 42714500 | 42715065 |
|   | 2  | 42472477 | 42481607 NM_053011    | chr2  | 42476658 | 42477420 |
|   | 10 | 42443911 | 42452657 NM_153055    | chr10 | 42452163 | 42452873 |
|   | 8  | 42391259 | 42399758 L29006       | chr8  | 42399177 | 42399614 |
|   | 19 | 42374659 | 42383158 BC024472     | chr19 | 42381202 | 42381806 |
|   | 19 | 42294885 | 42311593 NM_027694    | chr19 | 42308300 | 42308979 |
|   | 19 | 42294885 | 42311593 NM_027694    | chr19 | 42303103 | 42303866 |
|   | 7  | 42218734 | 42227233 NM_027702    | chr7  | 42224123 | 42224725 |
|   | 9  | 42220722 | 42229221 NM_173038    | chr9  | 42221311 | 42222060 |
|   | 17 | 42153269 | 42161768 BC089564     | chr17 | 42158563 | 42159464 |
|   | 9  | 42012696 | 42021251 NM_172769    | chr9  | 42018038 | 42018651 |
|   | 4  | 41979785 | 41988284 BC051472     | chr4  | 41979931 | 41980565 |
|   | 4  | 41956224 | 41968645 NM_001048179 | chr4  | 41958335 | 41958915 |
|   | 4  | 41938014 | 41953390 NM_010549    | chr4  | 41951771 | 41952366 |
|   | 4  | 41927285 | 41935824 NM_011014    | chr4  | 41934472 | 41935500 |
|   | 13 | 41855963 | 41864462 NM_175417    | chr13 | 41862108 | 41862704 |
|   | 11 | 41841243 | 41850101 NM_177408    | chr11 | 41841629 | 41842311 |
|   | 13 | 41654417 | 41662916 NM_177808    | chr13 | 41660459 | 41661066 |
|   | 13 | 41654417 | 41662916 NM_177808    | chr13 | 41658436 | 41658958 |
|   | 19 | 41640674 | 41649175 NM_183215    | chr19 | 41642818 | 41643723 |
|   | 12 | 41528539 | 41537495 NM_053122    | chr12 | 41534684 | 41535505 |
|   | 4  | 41500988 | 41509487 NM_026893    | chr4  | 41502086 | 41503023 |
|   | 10 | 41492989 | 41501488 BC100403     | chr10 | 41498746 | 41499435 |
|   | 10 | 41495784 | 41504290 NM_026643    | chr10 | 41498746 | 41499435 |
|   | 19 | 41435841 | 41444429 NM_031376    | chr19 | 41441918 | 41442649 |
|   | 19 | 41257647 | 41266146 NM_011904    | chr19 | 41263311 | 41263962 |
|   | 13 | 41228861 | 41237367 NM_019423    | chr13 | 41231706 | 41232517 |
|   | 6  | 41225876 | 41234378 NM_011646    | chr6  | 41230568 | 41231159 |
|   | 13 | 41078934 | 41087433 NM_008547    | chr13 | 41086106 | 41086714 |
| X |    | 41032129 | 41040778 NM_178739    | chrX  | 41034633 | 41035807 |
| X |    | 41032129 | 41040778 NM_178739    | chrX  | 41033083 | 41033683 |
|   | 6  | 40970947 | 40980469 M16122       | chr6  | 40976946 | 40978078 |
|   | 4  | 40883496 | 40897858 NM_025545    | chr4  | 40895368 | 40896006 |
|   | 3  | 40799420 | 40807980 NM_178386    | chr3  | 40806141 | 40806952 |
|   | 12 | 40731080 | 40739608 NM_013562    | chr12 | 40733070 | 40733694 |
| X |    | 40610470 | 40618969 NM_175539    | chrX  | 40610497 | 40612164 |
|   | 12 | 40544670 | 40554410 NM_001039515 | chr12 | 40550453 | 40551251 |
|   | 4  | 40455967 | 40464512 NM_134097    | chr4  | 40457660 | 40458454 |
|   | 17 | 40392191 | 40402816 NM_008650    | chr17 | 40402470 | 40403130 |
|   | 17 | 40395469 | 40404035 NM_031863    | chr17 | 40402470 | 40403130 |
|   | 17 | 40392191 | 40402816 NM_008650    | chr17 | 40400225 | 40400861 |
|   | 17 | 40395469 | 40404035 NM_031863    | chr17 | 40400225 | 40400861 |
|   | 6  | 40395022 | 40403540 NM_212468    | chr6  | 40397121 | 40397731 |
|   | 6  | 40366548 | 40375148 NM_201370    | chr6  | 40371773 | 40372382 |
|   | 9  | 40203836 | 40212335 NM_172768    | chr9  | 40203941 | 40204640 |
|   | 10 | 40032724 | 40041252 NM_198164    | chr10 | 40040150 | 40040918 |

|   |    |          |                       |       |          |          |
|---|----|----------|-----------------------|-------|----------|----------|
|   | 10 | 39989103 | 39997602 D12780       | chr10 | 39991085 | 39991691 |
|   | 9  | 39876031 | 39884530 NM_146855    | chr9  | 39877597 | 39878444 |
|   | 9  | 39698841 | 39713640 NM_146367    | chr9  | 39709889 | 39710539 |
|   | 10 | 39673563 | 39682062 NM_001001489 | chr10 | 39675559 | 39676298 |
|   | 15 | 39570006 | 39578505 NM_029422    | chr15 | 39577035 | 39577628 |
|   | 6  | 39571490 | 39579989 AF454556     | chr6  | 39575292 | 39575821 |
|   | 9  | 39413630 | 39422129 NM_001011827 | chr9  | 39420644 | 39421801 |
|   | 9  | 39413630 | 39422129 NM_001011827 | chr9  | 39417951 | 39418569 |
|   | 9  | 39391293 | 39399798 NM_146504    | chr9  | 39395404 | 39396010 |
|   | 1  | 39344957 | 39355915 U88873       | chr1  | 39350664 | 39351281 |
|   | 6  | 39343985 | 39352484 AB106871     | chr6  | 39348751 | 39349561 |
|   | 6  | 39347466 | 39358026 NM_018810    | chr6  | 39348751 | 39349561 |
|   | 1  | 39306695 | 39315194 NM_053257    | chr1  | 39312688 | 39313551 |
|   | 15 | 38830426 | 38839817 NM_008056    | chr15 | 38835862 | 38836477 |
|   | 9  | 38826888 | 38835387 NM_146438    | chr9  | 38834100 | 38834617 |
|   | 6  | 38803019 | 38811560 NM_010433    | chr6  | 38806876 | 38807482 |
| X |    | 38741189 | 38749796 NM_011364    | chrX  | 38748878 | 38749524 |
| X |    | 38741189 | 38749796 NM_011364    | chrX  | 38742517 | 38743117 |
|   | 9  | 38720222 | 38728721 NM_146441    | chr9  | 38724620 | 38725662 |
|   | 9  | 38720222 | 38728721 NM_146441    | chr9  | 38723213 | 38724032 |
|   | 16 | 38717014 | 38725533 NM_178924    | chr16 | 38717380 | 38717973 |
|   | 5  | 38601758 | 38610257 NM_013503    | chr5  | 38606034 | 38606864 |
|   | 19 | 38583341 | 38591840 NM_019588    | chr19 | 38588969 | 38589736 |
|   | 15 | 38443611 | 38452189 BC043722     | chr15 | 38451576 | 38452151 |
|   | 9  | 38406462 | 38430052 NM_146375    | chr9  | 38423183 | 38423799 |
|   | 9  | 38338794 | 38347293 NM_001011523 | chr9  | 38342478 | 38343144 |
| X |    | 38309952 | 38318451 U36842       | chrX  | 38313556 | 38314595 |
|   | 9  | 38283468 | 38291967 NM_146811    | chr9  | 38283987 | 38284699 |
|   | 13 | 38197950 | 38214932 NM_026382    | chr13 | 38198367 | 38199495 |
|   | 9  | 38193445 | 38201944 NM_146802    | chr9  | 38197495 | 38198421 |
|   | 18 | 37794309 | 37822874 NM_033586    | chr18 | 37812044 | 37813186 |
|   | 18 | 37794309 | 37822874 NM_033586    | chr18 | 37809800 | 37810727 |
|   | 18 | 37794309 | 37822874 NM_033586    | chr18 | 37800665 | 37802142 |
|   | 9  | 37791795 | 37800294 NM_001011798 | chr9  | 37796916 | 37797512 |
|   | 18 | 37776379 | 37790418 NM_033585    | chr18 | 37788621 | 37789690 |
|   | 9  | 37770379 | 37778878 NM_146419    | chr9  | 37775742 | 37776521 |
|   | 18 | 37762040 | 37776140 NM_175770    | chr18 | 37769870 | 37770751 |
|   | 19 | 37756998 | 37765527 NM_007811    | chr19 | 37758096 | 37758692 |
|   | 18 | 37633626 | 37646832 NM_053147    | chr18 | 37640653 | 37641360 |
| X |    | 37639983 | 37648640 NM_016886    | chrX  | 37640640 | 37641312 |
|   | 18 | 37633626 | 37646832 NM_053147    | chr18 | 37639257 | 37640051 |
|   | 18 | 37593514 | 37632802 NM_053143    | chr18 | 37623092 | 37624626 |
|   | 18 | 37593514 | 37632802 NM_053143    | chr18 | 37616072 | 37617003 |
|   | 19 | 37609562 | 37618102 NM_175353    | chr19 | 37615067 | 37615823 |
|   | 18 | 37593514 | 37632802 NM_053143    | chr18 | 37610469 | 37611226 |
|   | 9  | 37598491 | 37606990 NM_146417    | chr9  | 37603931 | 37604530 |
|   | 8  | 37557378 | 37570967 NM_172911    | chr8  | 37567866 | 37568458 |

|    |          |          |              |       |          |          |
|----|----------|----------|--------------|-------|----------|----------|
| 18 | 37555759 | 37576153 | NM_053139    | chr18 | 37561342 | 37563507 |
| 8  | 37557378 | 37570967 | NM_172911    | chr8  | 37559318 | 37559958 |
| 18 | 37531648 | 37540147 | NM_053135    | chr18 | 37537969 | 37538589 |
| 9  | 37489807 | 37498306 | NM_146882    | chr9  | 37495542 | 37496142 |
| 1  | 37478179 | 37486678 | NM_173870    | chr1  | 37485869 | 37486591 |
| 18 | 37475245 | 37483744 | NM_053133    | chr18 | 37481876 | 37482730 |
| 18 | 37454002 | 37470213 | NM_053132    | chr18 | 37468684 | 37469286 |
| 18 | 37454002 | 37470213 | NM_053132    | chr18 | 37467039 | 37468077 |
| 18 | 37454002 | 37470213 | NM_053132    | chr18 | 37462014 | 37462794 |
| 6  | 37453781 | 37462280 | NM_145364    | chr6  | 37455411 | 37456006 |
| 18 | 37440355 | 37448912 | NM_053130    | chr18 | 37447300 | 37448149 |
| 18 | 37440355 | 37448912 | NM_053130    | chr18 | 37445816 | 37446407 |
| 18 | 37414814 | 37435955 | NM_053128    | chr18 | 37425724 | 37426532 |
| 18 | 37384972 | 37393471 | NM_053126    | chr18 | 37391770 | 37392556 |
| 17 | 37265885 | 37274384 | NM_207155    | chr17 | 37269428 | 37270366 |
| 3  | 37249218 | 37257726 | NM_009350    | chr3  | 37251346 | 37251959 |
| 17 | 37216309 | 37224808 | NM_001011753 | chr17 | 37218787 | 37219392 |
| 17 | 37195905 | 37204404 | NM_146287    | chr17 | 37199912 | 37200568 |
| 1  | 37157807 | 37166307 | NM_009918    | chr1  | 37163701 | 37164344 |
| 18 | 37087605 | 37102275 | NM_001003672 | chr18 | 37099076 | 37100150 |
| 18 | 37087605 | 37102275 | NM_001003672 | chr18 | 37096276 | 37097329 |
| 18 | 37050158 | 37058657 | NM_198117    | chr18 | 37056567 | 37057764 |
| 18 | 36889689 | 36898188 | NM_173383    | chr18 | 36897239 | 36898045 |
| 17 | 36827144 | 36835643 | NM_146514    | chr17 | 36833165 | 36833802 |
| 12 | 36818492 | 36827014 | NM_025312    | chr12 | 36824512 | 36825172 |
| 5  | 36795683 | 36804198 | NM_025725    | chr5  | 36799656 | 36800260 |
| 18 | 36784034 | 36792655 | NM_201256    | chr18 | 36786672 | 36787265 |
| 16 | 36741646 | 36750146 | NM_177128    | chr16 | 36746173 | 36746790 |
| 16 | 36744945 | 36753498 | BC004721     | chr16 | 36746173 | 36746790 |
| 10 | 36657960 | 36666499 | NM_008229    | chr10 | 36662917 | 36663909 |
| 2  | 36550332 | 36558831 | NM_146943    | chr2  | 36554522 | 36555130 |
| 17 | 36439237 | 36447738 | NM_001025599 | chr17 | 36444660 | 36445351 |
| 18 | 36401136 | 36415474 | NM_008989    | chr18 | 36408432 | 36409141 |
| 18 | 36401136 | 36415474 | NM_008989    | chr18 | 36404341 | 36405193 |
| 2  | 36384609 | 36393108 | NM_146628    | chr2  | 36389111 | 36389887 |
| 2  | 36343397 | 36351896 | NM_146948    | chr2  | 36345080 | 36345880 |
| 8  | 36295447 | 36303946 | BC094602     | chr8  | 36299821 | 36300550 |
| 1  | 36246300 | 36254826 | NM_145996    | chr1  | 36252241 | 36253062 |
| 1  | 36246300 | 36254826 | NM_145996    | chr1  | 36246509 | 36247118 |
| 19 | 36182440 | 36190986 | NM_013468    | chr19 | 36188251 | 36189187 |
| 19 | 36142875 | 36151374 | NM_019428    | chr19 | 36145287 | 36146430 |
| 13 | 36118876 | 36127848 | NM_024274    | chr13 | 36125963 | 36126580 |
| 13 | 36122198 | 36130822 | NM_201358    | chr13 | 36125963 | 36126580 |
| 3  | 36110238 | 36118737 | AF198092     | chr3  | 36117623 | 36118212 |
| 17 | 36067883 | 36076382 | NM_177634    | chr17 | 36071457 | 36071997 |
| 5  | 36068792 | 36077326 | NM_177678    | chr5  | 36070501 | 36071501 |
| 5  | 35993834 | 36002643 | NM_030127    | chr5  | 35993908 | 35994536 |

|   |    |          |                       |       |          |          |
|---|----|----------|-----------------------|-------|----------|----------|
|   | 2  | 35952663 | 35961175 NM_026422    | chr2  | 35955327 | 35955913 |
|   | 3  | 35939687 | 35948316 NM_029570    | chr3  | 35946528 | 35947361 |
|   | 17 | 35891975 | 35900474 NM_177923    | chr17 | 35897110 | 35897702 |
|   | 5  | 35864576 | 35873075 NM_011121    | chr5  | 35870446 | 35871052 |
|   | 18 | 35863954 | 35872504 BC046640     | chr18 | 35869625 | 35870338 |
|   | 13 | 35742778 | 35751277 BC062123     | chr13 | 35749639 | 35750232 |
|   | 18 | 35718625 | 35727140 NM_026420    | chr18 | 35724741 | 35725439 |
|   | 5  | 35589575 | 35598074 NM_007418    | chr5  | 35593226 | 35594022 |
|   | 17 | 35443761 | 35452285 NM_011655    | chr17 | 35447358 | 35447822 |
|   | 5  | 35367723 | 35376444 NM_172708    | chr5  | 35371270 | 35371881 |
|   | 4  | 35334942 | 35343441 NM_199157    | chr4  | 35335983 | 35336601 |
|   | 9  | 35303137 | 35316952 NM_023292    | chr9  | 35309960 | 35310485 |
|   | 9  | 35305586 | 35314135 NM_013932    | chr9  | 35309960 | 35310485 |
|   | 17 | 35267767 | 35287767 NM_175137    | chr17 | 35279384 | 35280190 |
|   | 5  | 35260308 | 35268807 NM_173402    | chr5  | 35266806 | 35267416 |
|   | 15 | 35234687 | 35243393 NM_054049    | chr15 | 35238529 | 35239360 |
|   | 8  | 35105379 | 35113911 NM_178648    | chr8  | 35109982 | 35110399 |
|   | 5  | 34951472 | 34960041 NM_026660    | chr5  | 34957413 | 34958128 |
| X |    | 34877181 | 34885736 NM_021550    | chrX  | 34880760 | 34881377 |
| X |    | 34877181 | 34885736 NM_021550    | chrX  | 34877470 | 34878159 |
|   | 3  | 34835604 | 34844453 NM_011443    | chr3  | 34843456 | 34844109 |
| X |    | 34788938 | 34797437 BC010347     | chrX  | 34793054 | 34793646 |
| X |    | 34788938 | 34797437 BC010347     | chrX  | 34791527 | 34792120 |
|   | 15 | 34775944 | 34785137 NM_181317    | chr15 | 34778645 | 34779240 |
|   | 17 | 34768605 | 34790057 NM_020027    | chr17 | 34771326 | 34771914 |
| X |    | 34698507 | 34707082 NM_010685    | chrX  | 34700488 | 34701105 |
| X |    | 34698507 | 34707082 NM_010685    | chrX  | 34699442 | 34700278 |
|   | 18 | 34629125 | 34637624 NM_146084    | chr18 | 34635431 | 34635915 |
|   | 17 | 34605898 | 34614802 NM_033075    | chr17 | 34612240 | 34612869 |
|   | 19 | 34610943 | 34619442 NM_008332    | chr19 | 34612120 | 34612753 |
|   | 2  | 34595807 | 34604306 AY351588     | chr2  | 34597354 | 34598356 |
|   | 19 | 34590920 | 34599419 NM_021460    | chr19 | 34592297 | 34592929 |
|   | 17 | 34496615 | 34509054 NM_145830    | chr17 | 34502178 | 34503016 |
|   | 18 | 34449946 | 34458483 NM_025527    | chr18 | 34456640 | 34457258 |
|   | 17 | 34452447 | 34460994 NM_001045864 | chr17 | 34454620 | 34455214 |
|   | 1  | 34378446 | 34393807 NM_178601    | chr1  | 34382056 | 34382815 |
|   | 1  | 34381719 | 34390218 NM_027159    | chr1  | 34382056 | 34382815 |
| X |    | 34327267 | 34335768 NM_198598    | chrX  | 34335152 | 34335692 |
| X |    | 34327267 | 34335768 NM_198598    | chrX  | 34330782 | 34331820 |
| X |    | 34305102 | 34313657 NM_001024850 | chrX  | 34312310 | 34313271 |
| X |    | 34305102 | 34313657 NM_001024850 | chrX  | 34311086 | 34311955 |
|   | 19 | 34277621 | 34288682 AB066213     | chr19 | 34281106 | 34281651 |
|   | 3  | 34270312 | 34278875 NM_001026211 | chr3  | 34275619 | 34276386 |
|   | 17 | 34231742 | 34241185 NM_030890    | chr17 | 34240787 | 34241339 |
|   | 17 | 34232654 | 34241402 NM_019441    | chr17 | 34240787 | 34241339 |
|   | 19 | 34229401 | 34238038 NM_024204    | chr19 | 34231643 | 34232293 |
|   | 11 | 34208822 | 34217321 NM_001025382 | chr11 | 34212194 | 34212698 |

|   |    |          |          |              |       |          |          |
|---|----|----------|----------|--------------|-------|----------|----------|
|   | 3  | 34205657 | 34214157 | NM_008053    | chr3  | 34211133 | 34211790 |
| X |    | 34143837 | 34152397 | NM_023894    | chrX  | 34148292 | 34149243 |
| X |    | 34143837 | 34152397 | NM_023894    | chrX  | 34145695 | 34147369 |
|   | 11 | 34105555 | 34114089 | NM_023907    | chr11 | 34106854 | 34107465 |
|   | 15 | 34021308 | 34029869 | NM_026002    | chr15 | 34028440 | 34029000 |
|   | 17 | 34018333 | 34026832 | NM_001001177 | chr17 | 34023287 | 34023802 |
| X |    | 33965142 | 33979333 | NM_001040089 | chrX  | 33976881 | 33977500 |
| X |    | 33965142 | 33979333 | NM_001040089 | chrX  | 33970411 | 33971259 |
|   | 17 | 33865432 | 33873967 | NM_207105    | chr17 | 33872411 | 33873029 |
| X |    | 33857369 | 33865906 | NM_201236    | chrX  | 33862059 | 33864244 |
| X |    | 33814492 | 33822991 | NM_001039695 | chrX  | 33820011 | 33821249 |
| X |    | 33814492 | 33822991 | NM_001039695 | chrX  | 33818974 | 33819822 |
|   | 17 | 33802583 | 33817290 | NM_011530    | chr17 | 33812176 | 33812924 |
|   | 16 | 33743412 | 33752005 | NM_010580    | chr16 | 33750480 | 33751129 |
| X |    | 33732451 | 33740970 | NM_021300    | chrX  | 33732539 | 33733241 |
|   | 17 | 33727265 | 33738201 | NM_001025387 | chr17 | 33728083 | 33728701 |
| X |    | 33670437 | 33683863 | NM_194063    | chrX  | 33683600 | 33684466 |
| X |    | 33670437 | 33683863 | NM_194063    | chrX  | 33681199 | 33681877 |
| X |    | 33670437 | 33683863 | NM_194063    | chrX  | 33675499 | 33676527 |
| X |    | 33639987 | 33648486 | NM_001033234 | chrX  | 33644364 | 33644962 |
| X |    | 33639987 | 33648486 | NM_001033234 | chrX  | 33641035 | 33642037 |
| X |    | 33616726 | 33625287 | NM_153503    | chrX  | 33622955 | 33624541 |
| X |    | 33620093 | 33628683 | NM_019443    | chrX  | 33622955 | 33624541 |
|   | 17 | 33559421 | 33572095 | NM_019420    | chr17 | 33562212 | 33562915 |
|   | 17 | 33560266 | 33568868 | NM_172620    | chr17 | 33562212 | 33562915 |
| X |    | 33552240 | 33560764 | NM_025937    | chrX  | 33557645 | 33558594 |
| X |    | 33539268 | 33547785 | NM_026573    | chrX  | 33539867 | 33540900 |
|   | 17 | 33513952 | 33532629 | NM_001025313 | chr17 | 33529340 | 33529926 |
| X |    | 33514130 | 33522629 | NM_026055    | chrX  | 33515490 | 33516128 |
| X |    | 33514130 | 33522629 | NM_026055    | chrX  | 33514324 | 33515020 |
|   | 8  | 33472545 | 33481044 | AY648975     | chr8  | 33473688 | 33474375 |
|   | 17 | 33443214 | 33451759 | NM_019421    | chr17 | 33450301 | 33451070 |
|   | 7  | 33445573 | 33454072 | NM_177446    | chr7  | 33449620 | 33450303 |
|   | 7  | 33445573 | 33454072 | NM_177446    | chr7  | 33447270 | 33448070 |
|   | 5  | 33415076 | 33423607 | NM_019810    | chr5  | 33422592 | 33423301 |
| X |    | 33418391 | 33426926 | NM_019942    | chrX  | 33418518 | 33419427 |
| X |    | 33331845 | 33340344 | NM_029891    | chrX  | 33334874 | 33335694 |
| X |    | 33331845 | 33340344 | NM_029891    | chrX  | 33332701 | 33333955 |
|   | 14 | 33329139 | 33337638 | NM_009758    | chr14 | 33330254 | 33330838 |
| X |    | 33303061 | 33311560 | BC021479     | chrX  | 33304469 | 33305084 |
| X |    | 33303061 | 33311560 | BC021479     | chrX  | 33303323 | 33304096 |
| X |    | 33221094 | 33229616 | NM_007451    | chrX  | 33225755 | 33226395 |
|   | 17 | 33156407 | 33164906 | NM_053214    | chr17 | 33164402 | 33164989 |
|   | 5  | 33142033 | 33150858 | NM_194340    | chr5  | 33146644 | 33147243 |
|   | 14 | 33043139 | 33051638 | NM_181529    | chr14 | 33050550 | 33051194 |
|   | 2  | 33044204 | 33052703 | AF125176     | chr2  | 33046950 | 33047563 |
|   | 14 | 33043139 | 33051638 | NM_181529    | chr14 | 33045913 | 33046652 |

|   |    |          |                       |       |          |          |
|---|----|----------|-----------------------|-------|----------|----------|
|   | 2  | 33044204 | 33052703 AF125176     | chr2  | 33045379 | 33045975 |
|   | 6  | 32987811 | 32996381 NM_025336    | chr6  | 32991332 | 32992083 |
|   | 3  | 32894275 | 32902806 NM_019673    | chr3  | 32896177 | 32896700 |
|   | 2  | 32780761 | 32789260 NM_199302    | chr2  | 32782229 | 32782840 |
| X |    | 32753854 | 32762451 NM_028894    | chrX  | 32761691 | 32762324 |
|   | 3  | 32715035 | 32725602 NM_024200    | chr3  | 32716605 | 32717410 |
|   | 4  | 32561563 | 32570062 NM_007521    | chr4  | 32563888 | 32564597 |
|   | 3  | 32554670 | 32563214 NM_009517    | chr3  | 32561269 | 32561906 |
|   | 17 | 32418969 | 32427488 NM_134127    | chr17 | 32423217 | 32423835 |
|   | 18 | 32377341 | 32385869 NM_133658    | chr18 | 32380277 | 32381316 |
|   | 16 | 32365450 | 32373949 NM_009981    | chr16 | 32371320 | 32371920 |
|   | 18 | 32278693 | 32288580 NM_001042768 | chr18 | 32283113 | 32283834 |
|   | 12 | 32217237 | 32225846 NM_007530    | chr12 | 32220964 | 32221554 |
|   | 17 | 32117822 | 32127093 NM_212438    | chr17 | 32125932 | 32126537 |
|   | 6  | 31974448 | 31982964 NM_029587    | chr6  | 31979210 | 31979827 |
|   | 12 | 31845349 | 31853954 NM_008482    | chr12 | 31852596 | 31853347 |
|   | 5  | 31723042 | 31731594 NM_172993    | chr5  | 31727911 | 31728521 |
|   | 14 | 31679848 | 31688347 NM_178791    | chr14 | 31682325 | 31682847 |
|   | 2  | 31665476 | 31674014 NM_178887    | chr2  | 31667702 | 31668502 |
|   | 2  | 31575993 | 31584494 NM_009594    | chr2  | 31579402 | 31580014 |
|   | 3  | 31498674 | 31507173 NM_172861    | chr3  | 31498954 | 31499911 |
|   | 12 | 31491721 | 31500738 NM_013709    | chr12 | 31495682 | 31496439 |
|   | 12 | 31495104 | 31503634 NM_021330    | chr12 | 31495682 | 31496439 |
|   | 5  | 31319240 | 31333891 NM_023525    | chr5  | 31320298 | 31320711 |
|   | 17 | 31238486 | 31246985 NM_021322    | chr17 | 31241298 | 31241891 |
|   | 5  | 31219562 | 31228061 BC023116     | chr5  | 31220406 | 31221095 |
|   | 5  | 31220653 | 31229152 NM_021304    | chr5  | 31220406 | 31221095 |
|   | 9  | 31129770 | 31138276 NM_172766    | chr9  | 31136186 | 31136699 |
|   | 1  | 31114981 | 31123480 NM_153601    | chr1  | 31121865 | 31122313 |
|   | 3  | 31040827 | 31049352 BC116649     | chr3  | 31048187 | 31048782 |
|   | 5  | 30918535 | 30927043 NM_175675    | chr5  | 30925935 | 30926682 |
|   | 1  | 30891765 | 30900301 NM_011200    | chr1  | 30895961 | 30896549 |
|   | 1  | 30891765 | 30900301 NM_011200    | chr1  | 30892481 | 30893261 |
|   | 6  | 30886646 | 30895145 DQ534758     | chr6  | 30892054 | 30892665 |
|   | 6  | 30886646 | 30895145 DQ534758     | chr6  | 30889851 | 30890723 |
|   | 17 | 30854108 | 30862623 NM_011575    | chr17 | 30861731 | 30862330 |
|   | 2  | 30801396 | 30809895 NM_144885    | chr2  | 30807788 | 30808251 |
|   | 2  | 30798343 | 30806842 AF449715     | chr2  | 30799708 | 30800319 |
|   | 17 | 30778710 | 30787257 NM_009593    | chr17 | 30785057 | 30785704 |
|   | 2  | 30768981 | 30777510 NM_133673    | chr2  | 30775203 | 30776017 |
|   | 5  | 30735984 | 30744513 NM_031875    | chr5  | 30741048 | 30742011 |
|   | 5  | 30736655 | 30745157 NM_029285    | chr5  | 30741048 | 30742011 |
|   | 6  | 30677516 | 30690576 NM_008590    | chr6  | 30684851 | 30686002 |
|   | 7  | 30661456 | 30671563 NM_011680    | chr7  | 30666128 | 30666724 |
|   | 2  | 30647764 | 30658342 NM_133346    | chr2  | 30656976 | 30657460 |
|   | 5  | 30483245 | 30491767 NM_178878    | chr5  | 30483742 | 30484329 |
|   | 7  | 30412496 | 30423508 NM_018731    | chr7  | 30418287 | 30419153 |



|    |          |                       |       |          |          |
|----|----------|-----------------------|-------|----------|----------|
| 11 | 30369309 | 30377829 BC049719     | chr11 | 30372255 | 30372840 |
| 10 | 30342706 | 30351233 BC049997     | chr10 | 30343254 | 30343911 |
| 5  | 30337931 | 30346447 NM_031168    | chr5  | 30342969 | 30343720 |
| 7  | 30236886 | 30249772 NM_178252    | chr7  | 30240948 | 30241560 |
| 16 | 30184780 | 30193279 NM_027904    | chr16 | 30184774 | 30185379 |
| 7  | 30163220 | 30172275 NM_172898    | chr7  | 30167583 | 30168203 |
| 5  | 30060727 | 30069305 NM_001037940 | chr5  | 30068598 | 30069228 |
| 14 | 30031321 | 30039826 NM_009393    | chr14 | 30033289 | 30033887 |
| 14 | 30033198 | 30041835 NM_022656    | chr14 | 30033289 | 30033887 |
| 7  | 29934834 | 29943333 NM_027259    | chr7  | 29943104 | 29944050 |
| 7  | 29938023 | 29950219 NM_025548    | chr7  | 29943104 | 29944050 |
| 14 | 29912477 | 29920976 BC055708     | chr14 | 29919082 | 29920038 |
| 14 | 29824409 | 29833391 NM_029626    | chr14 | 29831846 | 29832616 |
| 14 | 29827864 | 29836549 NM_026911    | chr14 | 29831846 | 29832616 |
| 19 | 29781056 | 29790032 NM_172836    | chr19 | 29784339 | 29785088 |
| 14 | 29702549 | 29718032 NM_018746    | chr14 | 29704459 | 29705183 |
| 2  | 29435729 | 29444295 NM_001039087 | chr2  | 29442610 | 29443298 |
| 7  | 29433257 | 29441792 NM_029714    | chr7  | 29434852 | 29435641 |
| 6  | 29411793 | 29420309 NM_025381    | chr6  | 29413783 | 29414604 |
| 19 | 29311825 | 29320951 NM_008413    | chr19 | 29318220 | 29318807 |
| 17 | 29270814 | 29279313 NM_198647    | chr17 | 29277561 | 29278158 |
| 17 | 29211824 | 29220556 NM_008842    | chr17 | 29219136 | 29219732 |
| 12 | 29201332 | 29215558 NM_027866    | chr12 | 29205508 | 29206282 |
| 2  | 29067550 | 29081015 NM_133501    | chr2  | 29070961 | 29071587 |
| 19 | 29050364 | 29058996 NM_025950    | chr19 | 29056110 | 29056709 |
| 19 | 29023917 | 29032449 NM_028922    | chr19 | 29026736 | 29027463 |
| 4  | 28975919 | 28984537 NM_010141    | chr4  | 28981106 | 28981712 |
| 2  | 28941001 | 28949500 NM_198033    | chr2  | 28948853 | 28949270 |
| 14 | 28909268 | 28917767 BC058783     | chr14 | 28913507 | 28914055 |
| 8  | 28877381 | 28893366 NM_021369    | chr8  | 28879941 | 28880533 |
| 17 | 28815439 | 28828370 NM_007669    | chr17 | 28827989 | 28828330 |
| 11 | 28761773 | 28770272 NM_146015    | chr11 | 28767543 | 28768033 |
| 2  | 28659780 | 28668302 NM_172977    | chr2  | 28666367 | 28667045 |
| 7  | 28584416 | 28592916 NM_021894    | chr7  | 28591694 | 28592161 |
| 8  | 28545777 | 28554276 NM_054044    | chr8  | 28552825 | 28553667 |
| 8  | 28545777 | 28554276 NM_054044    | chr8  | 28549626 | 28550314 |
| 14 | 28546376 | 28554875 NM_009785    | chr14 | 28548391 | 28549007 |
| 2  | 28516173 | 28524682 NM_001033874 | chr2  | 28523720 | 28524310 |
| 2  | 28519161 | 28527660 NM_027283    | chr2  | 28523720 | 28524310 |
| 2  | 28516173 | 28524682 NM_001033874 | chr2  | 28517554 | 28518164 |
| 17 | 28412931 | 28421599 NM_011951    | chr17 | 28421363 | 28421977 |
| 17 | 28415077 | 28423576 NM_146076    | chr17 | 28421363 | 28421977 |
| 17 | 28271074 | 28279573 NM_001034871 | chr17 | 28276042 | 28276676 |
| 17 | 28244870 | 28260950 NM_026290    | chr17 | 28259662 | 28260266 |
| 7  | 28035446 | 28043945 BC059849     | chr7  | 28040318 | 28040945 |
| 7  | 28018282 | 28026806 NM_025616    | chr7  | 28020650 | 28021326 |
| 7  | 27970641 | 27979140 NM_198425    | chr7  | 27977045 | 27977768 |

|    |          |          |              |       |          |          |
|----|----------|----------|--------------|-------|----------|----------|
| 17 | 27929367 | 27937918 | NM_027185    | chr17 | 27932603 | 27933207 |
| 5  | 27829680 | 27838227 | NM_028561    | chr5  | 27829901 | 27830772 |
| 17 | 27545632 | 27554131 | NM_001033279 | chr17 | 27546490 | 27547099 |
| 5  | 27374180 | 27382679 | NM_207282    | chr5  | 27382219 | 27382647 |
| 14 | 27326339 | 27335221 | NM_009524    | chr14 | 27328848 | 27329449 |
| 17 | 27278171 | 27295200 | NM_016660    | chr17 | 27284733 | 27285420 |
| 16 | 27282920 | 27291472 | NM_198166    | chr16 | 27284209 | 27284957 |
| 2  | 27246335 | 27254921 | NM_009500    | chr2  | 27250920 | 27251328 |
| 12 | 27049472 | 27059276 | NM_020557    | chr12 | 27057233 | 27058081 |
| 17 | 26858981 | 26867483 | NM_026063    | chr17 | 26865993 | 26866603 |
| 19 | 26809500 | 26821543 | NM_026003    | chr19 | 26816870 | 26817549 |
| 9  | 26773621 | 26782594 | NM_178113    | chr9  | 26773634 | 26774256 |
| 9  | 26743168 | 26751698 | NM_144543    | chr9  | 26743547 | 26744144 |
| 17 | 26664378 | 26673068 | NM_026307    | chr17 | 26667360 | 26668159 |
| 7  | 26511682 | 26520181 | NM_013809    | chr7  | 26517745 | 26518345 |
| 17 | 26502814 | 26511313 | NM_172149    | chr17 | 26503286 | 26503927 |
| 8  | 26476798 | 26485328 | NM_027194    | chr8  | 26478702 | 26479213 |
| 5  | 26367737 | 26376290 | NM_029376    | chr5  | 26373490 | 26373911 |
| 2  | 26114067 | 26122566 | NM_177841    | chr2  | 26120677 | 26121287 |
| 2  | 25942291 | 25950820 | NM_026495    | chr2  | 25942394 | 25942990 |
| 17 | 25860334 | 25868927 | NM_009733    | chr17 | 25865346 | 25866000 |
| 17 | 25834917 | 25853631 | NM_021793    | chr17 | 25844164 | 25844782 |
| 6  | 25637359 | 25646739 | NM_010338    | chr6  | 25639118 | 25639868 |
| 15 | 25561651 | 25570150 | NM_019472    | chr15 | 25566989 | 25567639 |
| 2  | 25516047 | 25531387 | NM_023326    | chr2  | 25530114 | 25530934 |
| 14 | 25500531 | 25509030 | NM_178668    | chr14 | 25502808 | 25503579 |
| 19 | 25483305 | 25491804 | BC050250     | chr19 | 25489172 | 25489845 |
| 17 | 25449351 | 25466964 | NM_177822    | chr17 | 25455378 | 25456212 |
| 17 | 25452503 | 25461002 | NM_145409    | chr17 | 25455378 | 25456212 |
| 2  | 25437169 | 25455920 | NM_007995    | chr2  | 25445902 | 25446497 |
| 2  | 25427956 | 25436455 | NM_001024616 | chr2  | 25434091 | 25434797 |
| 2  | 25358595 | 25374903 | NM_009422    | chr2  | 25362445 | 25362940 |
| 18 | 25306030 | 25314529 | NM_001033532 | chr18 | 25310523 | 25311138 |
| 18 | 25309132 | 25317640 | NM_001004361 | chr18 | 25310523 | 25311138 |
| 17 | 25295756 | 25304286 | NM_011447    | chr17 | 25301118 | 25301702 |
| 17 | 25300787 | 25309288 | NM_029624    | chr17 | 25301118 | 25301702 |
| 17 | 25295756 | 25304286 | NM_011447    | chr17 | 25297298 | 25297937 |
| 2  | 25280604 | 25297745 | NM_153557    | chr2  | 25295356 | 25296187 |
| 5  | 25264062 | 25272590 | NM_001004365 | chr5  | 25264810 | 25265422 |
| 19 | 25201187 | 25209686 | BC030316     | chr19 | 25206911 | 25207627 |
| 16 | 25196166 | 25204665 | NM_175165    | chr16 | 25203051 | 25204047 |
| 2  | 25138489 | 25147112 | NM_008169    | chr2  | 25138498 | 25139070 |
| 2  | 25091894 | 25100427 | NM_023464    | chr2  | 25097969 | 25098593 |
| 19 | 24926250 | 24934939 | NM_175013    | chr19 | 24929342 | 24930270 |
| 13 | 24833150 | 24841649 | NM_019551    | chr13 | 24837802 | 24838613 |
| 13 | 24836436 | 24844954 | NM_025790    | chr13 | 24837802 | 24838613 |
| 17 | 24806215 | 24814714 | NM_001001183 | chr17 | 24812844 | 24813636 |

|    |          |          |              |       |          |          |
|----|----------|----------|--------------|-------|----------|----------|
| 2  | 24765791 | 24774344 | NM_026021    | chr2  | 24771529 | 24772145 |
| 14 | 24733578 | 24742077 | NM_207229    | chr14 | 24737841 | 24738357 |
| 17 | 24600370 | 24626605 | NM_008340    | chr17 | 24623396 | 24624501 |
| 1  | 24564476 | 24575843 | BC020072     | chr1  | 24565802 | 24570362 |
| 10 | 24523030 | 24531552 | NM_134005    | chr10 | 24528205 | 24529370 |
| 14 | 24413988 | 24422487 | NM_175264    | chr14 | 24414582 | 24415298 |
| 10 | 24399019 | 24407518 | NM_008813    | chr10 | 24400277 | 24400921 |
| 5  | 24349919 | 24358478 | NM_053075    | chr5  | 24351533 | 24352361 |
| 8  | 24267149 | 24277172 | NM_029505    | chr8  | 24269928 | 24270545 |
| 8  | 24217292 | 24225812 | NM_008872    | chr8  | 24218727 | 24219672 |
| 1  | 24125975 | 24134496 | NM_007740    | chr1  | 24130476 | 24131100 |
| 18 | 24081940 | 24090450 | BC092539     | chr18 | 24085292 | 24085910 |
| 2  | 23994876 | 24011667 | NM_153511    | chr2  | 24007110 | 24007701 |
| 17 | 23945870 | 23954369 | NM_028056    | chr17 | 23951599 | 23952198 |
| 8  | 23939901 | 23948400 | NM_001012667 | chr8  | 23947020 | 23947621 |
| 5  | 23895369 | 23908208 | NM_001002897 | chr5  | 23900093 | 23900704 |
| 5  | 23897761 | 23906260 | NM_029020    | chr5  | 23900093 | 23900704 |
| 7  | 23815050 | 23823583 | NM_021307    | chr7  | 23819114 | 23819694 |
| 13 | 23740272 | 23773659 | NM_015786    | chr13 | 23765000 | 23765643 |
| 13 | 23761456 | 23775851 | NM_013550    | chr13 | 23765000 | 23765643 |
| 10 | 23732926 | 23741425 | NM_001010839 | chr10 | 23738927 | 23739591 |
| 10 | 23710638 | 23719137 | NM_001010838 | chr10 | 23716717 | 23717325 |
| 10 | 23672563 | 23688897 | NM_001010829 | chr10 | 23675898 | 23676576 |
| 17 | 23620344 | 23628853 | NM_001039238 | chr17 | 23626374 | 23626956 |
| 5  | 23604670 | 23613187 | NM_026448    | chr5  | 23609742 | 23610594 |
| 10 | 23578273 | 23586788 | NM_011704    | chr10 | 23581119 | 23581465 |
| 17 | 23541895 | 23550394 | BC027781     | chr17 | 23544288 | 23545102 |
| 8  | 23523120 | 23531621 | NM_007511    | chr8  | 23529899 | 23530494 |
| 17 | 23395230 | 23409509 | NM_018777    | chr17 | 23402944 | 23403747 |
| 17 | 23398893 | 23417640 | NM_001008425 | chr17 | 23402944 | 23403747 |
| 7  | 23361076 | 23369575 | NM_030735    | chr7  | 23363091 | 23363728 |
| 16 | 23230413 | 23238912 | BC027833     | chr16 | 23232350 | 23233103 |
| 19 | 23195997 | 23210822 | NM_010638    | chr19 | 23209101 | 23209884 |
| 16 | 23199851 | 23208350 | D16106       | chr16 | 23203371 | 23204080 |
| 16 | 23199851 | 23208350 | D16106       | chr16 | 23202144 | 23202805 |
| 6  | 23195766 | 23204265 | BC119565     | chr6  | 23201195 | 23202019 |
| 6  | 23195766 | 23204265 | BC119565     | chr6  | 23196466 | 23197554 |
| 13 | 23164108 | 23172607 | NM_134238    | chr13 | 23166674 | 23167442 |
| 16 | 23064549 | 23073056 | U49915       | chr16 | 23072352 | 23073031 |
| 16 | 23064549 | 23073056 | U49915       | chr16 | 23070491 | 23071100 |
| 16 | 23040565 | 23049064 | NM_145480    | chr16 | 23046448 | 23046989 |
| 16 | 22941844 | 22950402 | NM_201375    | chr16 | 22948014 | 22948683 |
| 16 | 22941844 | 22950402 | NM_201375    | chr16 | 22945138 | 22945827 |
| 17 | 22903662 | 22912161 | D10632       | chr17 | 22907819 | 22908864 |
| 2  | 22885276 | 22893957 | NM_028793    | chr2  | 22890788 | 22891405 |
| X  | 22844076 | 22852616 | BC068151     | chrX  | 22850839 | 22851930 |
| 16 | 22801376 | 22809917 | NM_013465    | chr16 | 22803194 | 22803866 |

|   |    |          |                       |       |          |          |
|---|----|----------|-----------------------|-------|----------|----------|
|   | 16 | 22767198 | 22775802 NM_026400    | chr16 | 22772451 | 22773163 |
|   | 16 | 22770373 | 22778872 BC082558     | chr16 | 22772451 | 22773163 |
|   | 11 | 22734698 | 22743197 AF092050     | chr11 | 22741089 | 22741758 |
|   | 12 | 22450725 | 22459224 NM_001004167 | chr12 | 22458609 | 22459169 |
|   | 12 | 22450725 | 22459224 NM_001004167 | chr12 | 22456424 | 22457994 |
|   | 12 | 22450725 | 22459224 NM_001004167 | chr12 | 22453421 | 22454262 |
|   | 13 | 22089343 | 22097842 NM_145850    | chr13 | 22095393 | 22096046 |
|   | 17 | 22061715 | 22072094 NM_176962    | chr17 | 22069020 | 22069696 |
|   | 17 | 22060153 | 22068725 NM_145484    | chr17 | 22061857 | 22062386 |
|   | 17 | 22061715 | 22072094 NM_176962    | chr17 | 22061857 | 22062386 |
|   | 4  | 22016168 | 22029965 NM_175234    | chr4  | 22023786 | 22024405 |
|   | 9  | 21970173 | 21978672 NM_172763    | chr9  | 21975439 | 21976038 |
|   | 10 | 21969106 | 21977605 NM_010400    | chr10 | 21974199 | 21974785 |
|   | 16 | 21908296 | 21916795 NM_153404    | chr16 | 21909447 | 21909989 |
|   | 13 | 21811920 | 21821748 NM_178185    | chr13 | 21813102 | 21813832 |
|   | 16 | 21699280 | 21707786 NM_023737    | chr16 | 21706479 | 21707039 |
|   | 10 | 21678111 | 21686620 NM_011361    | chr10 | 21680753 | 21681703 |
|   | 13 | 21579420 | 21587919 NM_146540    | chr13 | 21584907 | 21585463 |
|   | 19 | 21537144 | 21545758 NM_010266    | chr19 | 21537290 | 21537941 |
|   | 12 | 21523489 | 21538727 NM_008403    | chr12 | 21533905 | 21534654 |
|   | 12 | 21526889 | 21535433 NM_018813    | chr12 | 21533905 | 21534654 |
|   | 11 | 21466284 | 21474820 NM_145425    | chr11 | 21473487 | 21473922 |
|   | 11 | 21469304 | 21477833 NM_008618    | chr11 | 21473487 | 21473922 |
|   | 17 | 21355904 | 21364403 BC064464     | chr17 | 21356802 | 21357662 |
|   | 18 | 21209354 | 21217855 NM_008586    | chr18 | 21214997 | 21215872 |
|   | 13 | 21148047 | 21156546 NM_146534    | chr13 | 21150317 | 21150944 |
|   | 2  | 21117478 | 21132850 NM_177588    | chr2  | 21129316 | 21129925 |
|   | 2  | 21117478 | 21132850 NM_177588    | chr2  | 21128492 | 21129081 |
|   | 2  | 21120519 | 21129119 AY454124     | chr2  | 21128492 | 21129081 |
|   | 2  | 21117478 | 21132850 NM_177588    | chr2  | 21122495 | 21123181 |
|   | 2  | 21120519 | 21129119 AY454124     | chr2  | 21122495 | 21123181 |
|   | 2  | 21052674 | 21061173 NM_001002781 | chr2  | 21057284 | 21057926 |
|   | 9  | 20941443 | 20949942 NM_019798    | chr9  | 20947625 | 20948370 |
| X |    | 20865859 | 20874416 NM_020049    | chrX  | 20873697 | 20874332 |
| X |    | 20865859 | 20874416 NM_020049    | chrX  | 20867241 | 20867833 |
| X |    | 20635585 | 20645551 NM_007429    | chrX  | 20642769 | 20643425 |
|   | 11 | 20638988 | 20647502 NM_181411    | chr11 | 20640484 | 20641266 |
| X |    | 20635585 | 20645551 NM_007429    | chrX  | 20639188 | 20639883 |
| X |    | 20635585 | 20645551 NM_007429    | chrX  | 20636272 | 20636906 |
|   | 16 | 20559229 | 20567777 NM_134101    | chr16 | 20561924 | 20562449 |
|   | 14 | 20526454 | 20543174 NM_001007268 | chr14 | 20530653 | 20531566 |
|   | 17 | 20513192 | 20521691 NM_134190    | chr17 | 20515526 | 20516323 |
|   | 3  | 20431728 | 20440231 NM_007753    | chr3  | 20432076 | 20432828 |
|   | 3  | 20344589 | 20353146 NM_013755    | chr3  | 20349542 | 20350430 |
| X |    | 20243689 | 20252188 NM_183185    | chrX  | 20249468 | 20249928 |
| X |    | 20243689 | 20252188 NM_183185    | chrX  | 20248092 | 20248702 |
| X |    | 20243689 | 20252188 NM_183185    | chrX  | 20245524 | 20246180 |

|   |    |          |          |              |       |          |          |
|---|----|----------|----------|--------------|-------|----------|----------|
|   | 11 | 20230088 | 20242016 | NM_018861    | chr11 | 20240753 | 20241601 |
| X |    | 20216463 | 20224962 | NM_001013387 | chrX  | 20222644 | 20223203 |
| X |    | 20216463 | 20224962 | NM_001013387 | chrX  | 20220189 | 20221392 |
|   | 16 | 20213406 | 20221905 | NM_001005767 | chr16 | 20216884 | 20217600 |
|   | 17 | 20200996 | 20209495 | NM_134194    | chr17 | 20208129 | 20208774 |
| X |    | 20085984 | 20094483 | NM_008823    | chrX  | 20088504 | 20089108 |
| X |    | 20075356 | 20083870 | NM_013680    | chrX  | 20081759 | 20082604 |
| X |    | 20075356 | 20083870 | NM_013680    | chrX  | 20077952 | 20078895 |
| X |    | 19999537 | 20012777 | NM_009703    | chrX  | 20006422 | 20007366 |
|   | 9  | 19956703 | 19965202 | NM_146903    | chr9  | 19958658 | 19959506 |
|   | 11 | 19916630 | 19925129 | BC030460     | chr11 | 19920539 | 19922421 |
| X |    | 19854891 | 19871598 | NM_145628    | chrX  | 19856641 | 19857552 |
| X |    | 19839393 | 19848220 | NM_011049    | chrX  | 19846499 | 19847102 |
| X |    | 19839393 | 19848220 | NM_011049    | chrX  | 19844086 | 19845059 |
| X |    | 19839393 | 19848220 | NM_011049    | chrX  | 19840895 | 19841496 |
|   | 11 | 19818375 | 19826944 | NM_033523    | chr11 | 19824749 | 19825449 |
| X |    | 19809380 | 19822413 | NM_009457    | chrX  | 19820206 | 19821227 |
| X |    | 19809380 | 19822413 | NM_009457    | chrX  | 19818126 | 19818608 |
| X |    | 19809380 | 19822413 | NM_009457    | chrX  | 19815307 | 19816733 |
|   | 9  | 19775938 | 19784437 | NM_146558    | chr9  | 19777287 | 19777917 |
| X |    | 19769154 | 19780513 | NM_019435    | chrX  | 19775449 | 19776425 |
| X |    | 19770955 | 19779454 | NM_145627    | chrX  | 19775449 | 19776425 |
|   | 13 | 19624609 | 19633268 | NM_134065    | chr13 | 19627624 | 19628669 |
|   | 13 | 19624648 | 19633180 | NM_016687    | chr13 | 19627624 | 19628669 |
| X |    | 19611486 | 19619985 | NM_199317    | chrX  | 19615131 | 19615924 |
|   | 9  | 19594576 | 19603075 | NM_146528    | chr9  | 19597785 | 19598372 |
|   | 4  | 19494752 | 19503251 | NM_027769    | chr4  | 19495829 | 19496419 |
|   | 4  | 19496245 | 19504850 | NM_025476    | chr4  | 19495829 | 19496419 |
|   | 2  | 19469165 | 19477668 | NM_027600    | chr2  | 19472739 | 19473329 |
|   | 13 | 19400716 | 19409217 | NM_024270    | chr13 | 19405906 | 19406588 |
|   | 2  | 19357392 | 19372723 | NM_018809    | chr2  | 19367086 | 19367695 |
|   | 16 | 19319142 | 19327641 | NM_146466    | chr16 | 19319339 | 19319940 |
|   | 14 | 19282847 | 19291346 | BC119773     | chr14 | 19286061 | 19286620 |
|   | 14 | 19282847 | 19291346 | BC119773     | chr14 | 19285208 | 19285874 |
|   | 8  | 19188334 | 19201182 | NM_019728    | chr8  | 19192812 | 19193455 |
|   | 16 | 19152754 | 19161253 | M34598       | chr16 | 19155617 | 19156454 |
|   | 9  | 19109256 | 19117755 | NM_146282    | chr9  | 19110349 | 19111322 |
|   | 9  | 18997300 | 19005799 | NM_146567    | chr9  | 18999969 | 19000457 |
|   | 9  | 18881394 | 18889896 | NM_146565    | chr9  | 18886588 | 18887284 |
|   | 7  | 18848514 | 18863574 | NM_009696    | chr7  | 18856760 | 18857512 |
|   | 7  | 18853835 | 18862334 | BC038887     | chr7  | 18856760 | 18857512 |
|   | 19 | 18774255 | 18782783 | NM_177640    | chr19 | 18774914 | 18775532 |
|   | 14 | 18765446 | 18773945 | NM_010315    | chr14 | 18767000 | 18767679 |
|   | 15 | 18757672 | 18767845 | AF183946     | chr15 | 18761087 | 18761674 |
|   | 16 | 18719872 | 18728399 | NM_011672    | chr16 | 18724841 | 18725459 |
|   | 16 | 18722641 | 18731535 | NM_009862    | chr16 | 18724841 | 18725459 |
| X |    | 18635779 | 18644278 | NM_207524    | chrX  | 18638782 | 18639550 |

|   |    |          |          |              |       |          |          |
|---|----|----------|----------|--------------|-------|----------|----------|
| X |    | 18635779 | 18644278 | NM_207524    | chrX  | 18636776 | 18638534 |
|   | 7  | 18427579 | 18444571 | NM_177691    | chr7  | 18430710 | 18431299 |
|   | 7  | 18333704 | 18342203 | BC055476     | chr7  | 18336828 | 18337803 |
|   | 16 | 18254960 | 18263459 | BC005445     | chr16 | 18262836 | 18263835 |
|   | 16 | 18255837 | 18264336 | NM_033474    | chr16 | 18262836 | 18263835 |
|   | 16 | 18235507 | 18244006 | NM_138583    | chr16 | 18236336 | 18236945 |
|   | 16 | 18159766 | 18168276 | NM_011239    | chr16 | 18167615 | 18168255 |
|   | 10 | 18153397 | 18161896 | BC030842     | chr10 | 18157201 | 18157859 |
|   | 6  | 18056556 | 18065057 | NM_023729    | chr6  | 18059800 | 18060735 |
|   | 9  | 18036669 | 18045180 | NM_025844    | chr9  | 18042249 | 18042830 |
|   | 16 | 17801766 | 17814776 | NM_009435    | chr16 | 17813691 | 17814178 |
|   | 16 | 17667234 | 17678870 | NM_145479    | chr16 | 17668965 | 17669413 |
|   | 7  | 17510898 | 17519397 | NM_011963    | chr7  | 17517119 | 17517715 |
|   | 19 | 17421112 | 17429636 | NM_173442    | chr19 | 17421813 | 17422773 |
|   | 17 | 17326565 | 17335259 | NM_172827    | chr17 | 17329147 | 17329765 |
| X |    | 17313626 | 17322125 | NM_009483    | chrX  | 17320989 | 17322028 |
|   | 7  | 17162411 | 17170923 | NM_027210    | chr7  | 17165448 | 17166036 |
|   | 11 | 17086847 | 17095346 | BC002267     | chr11 | 17090567 | 17091149 |
|   | 14 | 17028808 | 17038216 | NM_011584    | chr14 | 17036209 | 17036888 |
|   | 16 | 16977786 | 16993837 | NM_023249    | chr16 | 16991829 | 16992369 |
|   | 19 | 16938230 | 16946849 | NM_008023    | chr19 | 16945921 | 16946563 |
|   | 12 | 16914670 | 16923169 | NM_009072    | chr12 | 16921750 | 16922339 |
|   | 16 | 16890945 | 16899629 | NM_011949    | chr16 | 16898366 | 16898915 |
|   | 11 | 16845413 | 16855712 | NM_176982    | chr11 | 16851572 | 16852199 |
|   | 18 | 16415508 | 16424027 | BC021916     | chr18 | 16418385 | 16419018 |
|   | 19 | 16332155 | 16340654 | NM_018858    | chr19 | 16333942 | 16334531 |
|   | 11 | 16151775 | 16160274 | NM_145967    | chr11 | 16155371 | 16155957 |
| X |    | 16066224 | 16074723 | NM_010883    | chrX  | 16066863 | 16067964 |
|   | 7  | 16044308 | 16055966 | NM_010320    | chr7  | 16049166 | 16049752 |
|   | 7  | 15933868 | 15942864 | NM_009201    | chr7  | 15940662 | 15941868 |
|   | 4  | 15938525 | 15947024 | NM_145950    | chr4  | 15938775 | 15939412 |
|   | 13 | 15799362 | 15807869 | NM_008380    | chr13 | 15804965 | 15805931 |
|   | 17 | 15095209 | 15109986 | NM_024203    | chr17 | 15100166 | 15100975 |
|   | 9  | 15081159 | 15097487 | NM_176976    | chr9  | 15082695 | 15083323 |
|   | 3  | 14857450 | 14865968 | NM_009801    | chr3  | 14863690 | 14864296 |
|   | 3  | 14857450 | 14865968 | NM_009801    | chr3  | 14859882 | 14860663 |
|   | 18 | 14843169 | 14851706 | BC116990     | chr18 | 14849111 | 14849724 |
|   | 17 | 14690938 | 14703808 | NM_024250    | chr17 | 14702445 | 14702887 |
|   | 9  | 14651778 | 14667311 | NM_022888    | chr9  | 14653644 | 14654286 |
|   | 9  | 14604647 | 14613146 | NM_010287    | chr9  | 14612546 | 14613100 |
|   | 19 | 14514064 | 14522563 | AF141905     | chr19 | 14518299 | 14519418 |
| X |    | 14265926 | 14274871 | NM_026128    | chrX  | 14268533 | 14269634 |
|   | 9  | 14103511 | 14112010 | BC025228     | chr9  | 14108015 | 14108651 |
|   | 19 | 13829326 | 13837825 | NM_146344    | chr19 | 13835312 | 13835903 |
|   | 19 | 13829326 | 13837825 | NM_146344    | chr19 | 13833511 | 13834264 |
|   | 16 | 13814042 | 13822713 | NM_001039533 | chr16 | 13819182 | 13819788 |
|   | 1  | 13572472 | 13581078 | NM_028173    | chr1  | 13573762 | 13574560 |

|   |    |          |          |              |       |          |          |
|---|----|----------|----------|--------------|-------|----------|----------|
|   | 19 | 13519035 | 13527534 | NM_146690    | chr19 | 13525890 | 13527700 |
| X |    | 13362071 | 13370606 | BC100482     | chrX  | 13368090 | 13368772 |
|   | 19 | 13251688 | 13260187 | NM_146693    | chr19 | 13258549 | 13259109 |
|   | 13 | 13223817 | 13232316 | NM_010917    | chr13 | 13228363 | 13228990 |
|   | 19 | 13211177 | 13219676 | NM_146689    | chr19 | 13215620 | 13216292 |
|   | 14 | 13115380 | 13123879 | NM_147027    | chr14 | 13118117 | 13118711 |
|   | 18 | 13082390 | 13091010 | NM_207530    | chr18 | 13085473 | 13085986 |
|   | 8  | 13031285 | 13039843 | NM_007972    | chr8  | 13036098 | 13036726 |
|   | 8  | 13031285 | 13039843 | NM_007972    | chr8  | 13034351 | 13035090 |
| X |    | 13001016 | 13009515 | NM_009806    | chrX  | 13003763 | 13005726 |
|   | 18 | 12878524 | 12890158 | NM_027687    | chr18 | 12885521 | 12886189 |
|   | 19 | 12857212 | 12868161 | NM_134152    | chr19 | 12865316 | 12866007 |
|   | 19 | 12860642 | 12869141 | NM_053009    | chr19 | 12865316 | 12866007 |
|   | 19 | 12857212 | 12868161 | NM_134152    | chr19 | 12863036 | 12863759 |
|   | 19 | 12860642 | 12869141 | NM_053009    | chr19 | 12863036 | 12863759 |
|   | 4  | 12828005 | 12836504 | NM_173746    | chr4  | 12831690 | 12832285 |
|   | 17 | 12780829 | 12789334 | NM_153151    | chr17 | 12786870 | 12787488 |
|   | 18 | 12780952 | 12789468 | NM_028341    | chr18 | 12784924 | 12785497 |
|   | 14 | 12751993 | 12760544 | NM_025435    | chr14 | 12756559 | 12757454 |
|   | 14 | 12751993 | 12760544 | NM_025435    | chr14 | 12753182 | 12753768 |
| X |    | 12709406 | 12717905 | BC009740     | chrX  | 12713919 | 12714345 |
| X |    | 12709406 | 12717905 | BC009740     | chrX  | 12711566 | 12712652 |
| X |    | 12709406 | 12717905 | BC009740     | chrX  | 12709420 | 12710470 |
|   | 19 | 12661133 | 12669632 | NM_001013762 | chr19 | 12662666 | 12663389 |
| X |    | 12618631 | 12627131 | BC035244     | chrX  | 12623900 | 12624831 |
| X |    | 12618631 | 12627131 | BC035244     | chrX  | 12622179 | 12622981 |
|   | 17 | 12516552 | 12525196 | NM_009202    | chr17 | 12522351 | 12522953 |
|   | 19 | 12483356 | 12497481 | NM_019540    | chr19 | 12488667 | 12489595 |
|   | 13 | 12480994 | 12489493 | BC019693     | chr13 | 12486417 | 12487020 |
|   | 19 | 12483356 | 12497481 | NM_019540    | chr19 | 12484985 | 12485653 |
| X |    | 12442782 | 12452080 | U42386       | chrX  | 12445977 | 12446828 |
|   | 12 | 12282163 | 12290662 | BC049664     | chr12 | 12286360 | 12287010 |
|   | 18 | 12262517 | 12271016 | NM_178801    | chr18 | 12263129 | 12263746 |
| X |    | 12222457 | 12230995 | NM_009481    | chrX  | 12229984 | 12230950 |
|   | 19 | 11973481 | 11982002 | NM_172635    | chr19 | 11979922 | 11980539 |
|   | 19 | 11957044 | 11965543 | NM_146410    | chr19 | 11963234 | 11963875 |
|   | 11 | 11925475 | 11933974 | BC016111     | chr11 | 11927876 | 11929731 |
| X |    | 11916431 | 11925032 | NM_001048208 | chrX  | 11918711 | 11920370 |
| X |    | 11916431 | 11925032 | NM_001048208 | chrX  | 11917291 | 11918424 |
|   | 7  | 11872027 | 11880526 | NM_175558    | chr7  | 11875040 | 11875636 |
| X |    | 11828006 | 11836517 | NM_175141    | chrX  | 11832190 | 11832787 |
| X |    | 11828006 | 11836517 | NM_175141    | chrX  | 11830690 | 11831854 |
|   | 7  | 11729240 | 11737739 | NM_022981    | chr7  | 11736801 | 11737620 |
|   | 2  | 11690417 | 11698929 | NM_177268    | chr2  | 11697808 | 11698563 |
|   | 2  | 11692881 | 11701380 | NM_015792    | chr2  | 11697808 | 11698563 |
|   | 2  | 11690417 | 11698929 | NM_177268    | chr2  | 11696690 | 11697611 |
|   | 2  | 11692881 | 11701380 | NM_015792    | chr2  | 11696690 | 11697611 |

|   |    |          |                       |       |          |          |
|---|----|----------|-----------------------|-------|----------|----------|
|   | 14 | 11613813 | 11622346 NM_012061    | chr14 | 11617931 | 11618531 |
|   | 11 | 11579928 | 11592868 NM_001025597 | chr11 | 11581913 | 11582739 |
|   | 2  | 11518553 | 11527052 NM_152824    | chr2  | 11523737 | 11524328 |
|   | 11 | 11359912 | 11368411 NM_015785    | chr11 | 11365533 | 11365943 |
|   | 16 | 11313226 | 11321725 NM_028964    | chr16 | 11314713 | 11315414 |
| X |    | 11234328 | 11243013 NM_175045    | chrX  | 11242372 | 11242968 |
| X |    | 11234328 | 11243013 NM_175045    | chrX  | 11238978 | 11239780 |
| X |    | 11234328 | 11243013 NM_175045    | chrX  | 11234324 | 11235249 |
|   | 16 | 11164749 | 11173787 NM_146066    | chr16 | 11169270 | 11169861 |
|   | 16 | 11087368 | 11095867 NM_145931    | chr16 | 11090119 | 11090749 |
|   | 18 | 11046506 | 11056992 NM_010258    | chr18 | 11048365 | 11049181 |
|   | 10 | 11027594 | 11036134 NM_010146    | chr10 | 11029968 | 11030581 |
|   | 16 | 10999010 | 11007509 NM_134105    | chr16 | 11004155 | 11004766 |
|   | 10 | 10965564 | 10974063 NM_027968    | chr10 | 10973009 | 10973599 |
|   | 17 | 10681028 | 10689549 NM_027032    | chr17 | 10683850 | 10684844 |
|   | 19 | 10638768 | 10647267 NM_201351    | chr19 | 10642420 | 10642913 |
|   | 19 | 10640044 | 10650407 NM_028411    | chr19 | 10642420 | 10642913 |
|   | 19 | 10547419 | 10555973 NM_133689    | chr19 | 10554405 | 10554985 |
|   | 19 | 10547419 | 10555973 NM_133689    | chr19 | 10548966 | 10549649 |
| X |    | 10450183 | 10484020 BC049545     | chrX  | 10481397 | 10482309 |
| X |    | 10450183 | 10484020 BC049545     | chrX  | 10478087 | 10479319 |
| X |    | 10450183 | 10484020 BC049545     | chrX  | 10473386 | 10474252 |
| X |    | 10450183 | 10484020 BC049545     | chrX  | 10471789 | 10472873 |
| X |    | 10450183 | 10484020 BC049545     | chrX  | 10468764 | 10469767 |
| X |    | 10450183 | 10484020 BC049545     | chrX  | 10465597 | 10466613 |
|   | 16 | 10453834 | 10462632 NM_021428    | chr16 | 10461876 | 10462484 |
| X |    | 10450183 | 10484020 BC049545     | chrX  | 10456202 | 10456801 |
|   | 3  | 10309043 | 10324188 NM_001010834 | chr3  | 10309037 | 10309776 |
|   | 19 | 10243966 | 10252572 NM_146094    | chr19 | 10249187 | 10249944 |
|   | 16 | 10149598 | 10158097 BC018510     | chr16 | 10155839 | 10156436 |
|   | 19 | 10079273 | 10087807 NM_144538    | chr19 | 10086816 | 10087157 |
|   | 8  | 10000605 | 10009125 NM_033622    | chr8  | 10005343 | 10006447 |
|   | 8  | 9971836  | 9980375 BC043690      | chr8  | 9979762  | 9980412  |
|   | 8  | 9973796  | 9983658 NM_176953     | chr8  | 9979762  | 9980412  |
|   | 3  | 9813663  | 9822162 NM_053182     | chr3  | 9814026  | 9815119  |
| X |    | 9730352  | 9738851 BC026516      | chrX  | 9737945  | 9738618  |
| X |    | 9730352  | 9738851 BC026516      | chrX  | 9732700  | 9733846  |
| X |    | 9403318  | 9411825 NM_008769     | chrX  | 9407510  | 9408655  |
|   | 7  | 9367733  | 9376274 NM_009577     | chr7  | 9375627  | 9376237  |
| X |    | 9371173  | 9379697 NM_011285     | chrX  | 9371263  | 9371987  |
|   | 10 | 9362899  | 9371398 NM_177271     | chr10 | 9366636  | 9367371  |
| X |    | 9272047  | 9280620 NM_016911     | chrX  | 9272843  | 9273732  |
|   | 11 | 9195290  | 9203789 AY160971      | chr11 | 9199371  | 9200099  |
| X |    | 9036581  | 9045080 NM_177704     | chrX  | 9043188  | 9043774  |
| X |    | 9036581  | 9045080 NM_177704     | chrX  | 9038537  | 9039173  |
| X |    | 9036581  | 9045080 NM_177704     | chrX  | 9037269  | 9038275  |
| X |    | 8997906  | 9009161 NM_026096     | chrX  | 9005052  | 9005598  |



|   |    |         |                      |       |         |         |
|---|----|---------|----------------------|-------|---------|---------|
|   | 19 | 9002965 | 9011589 NM_011842    | chr19 | 9004296 | 9004892 |
|   | 12 | 8993900 | 9002399 NM_172470    | chr12 | 8997280 | 8997955 |
|   | 19 | 8945404 | 8961730 AY941793     | chr19 | 8950736 | 8951336 |
|   | 19 | 8949948 | 8967655 NM_008060    | chr19 | 8950736 | 8951336 |
|   | 12 | 8941315 | 8950634 NM_008640    | chr12 | 8944589 | 8945180 |
|   | 19 | 8911830 | 8920356 NM_001013019 | chr19 | 8913966 | 8914572 |
|   | 19 | 8903676 | 8912291 NM_010316    | chr19 | 8909961 | 8910566 |
|   | 19 | 8832041 | 8840540 NM_025791    | chr19 | 8835940 | 8836528 |
| X |    | 8817370 | 8825942 NM_025975    | chrX  | 8818419 | 8819261 |
|   | 12 | 8718099 | 8726598 BC041773     | chr12 | 8725629 | 8726418 |
|   | 19 | 8652334 | 8662748 NM_031194    | chr19 | 8654234 | 8654839 |
|   | 3  | 8647560 | 8656112 NM_010423    | chr3  | 8651352 | 8651963 |
|   | 15 | 8389179 | 8397678 NM_027707    | chr15 | 8389703 | 8390451 |
|   | 16 | 8380134 | 8388633 NM_146247    | chr16 | 8383340 | 8384240 |
|   | 17 | 8228803 | 8237302 NM_013682    | chr17 | 8236017 | 8236614 |
|   | 19 | 8196528 | 8205027 NM_001013820 | chr19 | 8200560 | 8201484 |
|   | 7  | 8197677 | 8206176 NM_198961    | chr7  | 8198830 | 8199935 |
| X |    | 8184444 | 8192951 NM_031261    | chrX  | 8191813 | 8192779 |
| X |    | 8184444 | 8192951 NM_031261    | chrX  | 8187430 | 8188115 |
|   | 7  | 7953991 | 7962519 BC071238     | chr7  | 7959910 | 7960365 |
|   | 9  | 7832972 | 7843585 NM_007465    | chr9  | 7835764 | 7836394 |
|   | 17 | 7777984 | 7786656 NM_025789    | chr17 | 7783915 | 7784513 |
|   | 10 | 7489144 | 7497643 BC004652     | chr10 | 7489711 | 7490263 |
| X |    | 7422353 | 7430852 NM_172479    | chrX  | 7429514 | 7430366 |
| X |    | 7406736 | 7415365 NM_133991    | chrX  | 7408963 | 7410039 |
| X |    | 7347340 | 7356471 NM_007898    | chrX  | 7350900 | 7351814 |
| X |    | 7347340 | 7356471 NM_007898    | chrX  | 7349963 | 7350849 |
| X |    | 7330641 | 7339140 NM_172478    | chrX  | 7331263 | 7332206 |
|   | 2  | 7311354 | 7319853 AF090696     | chr2  | 7315880 | 7316582 |
| X |    | 7300141 | 7308695 NM_016809    | chrX  | 7302488 | 7303640 |
| X |    | 7300141 | 7308695 NM_016809    | chrX  | 7301330 | 7302358 |
| X |    | 7300141 | 7308695 NM_016809    | chrX  | 7300305 | 7301273 |
| X |    | 7286820 | 7295562 NM_026137    | chrX  | 7288840 | 7289434 |
| X |    | 7244909 | 7253411 NM_009515    | chrX  | 7245087 | 7246027 |
| X |    | 7226930 | 7237599 NM_011514    | chrX  | 7231748 | 7232240 |
| X |    | 7226930 | 7237599 NM_011514    | chrX  | 7229251 | 7230403 |
| X |    | 7122275 | 7130835 NM_008089    | chrX  | 7125562 | 7126163 |
| X |    | 7101704 | 7110696 NM_010413    | chrX  | 7105281 | 7106439 |
| X |    | 7082983 | 7091566 NM_181548    | chrX  | 7087383 | 7088087 |
| X |    | 7082983 | 7091566 NM_181548    | chrX  | 7084340 | 7085312 |
| X |    | 7082983 | 7091566 NM_181548    | chrX  | 7083437 | 7084027 |
| X |    | 7050357 | 7058874 NM_011591    | chrX  | 7055166 | 7056059 |
| X |    | 7050357 | 7058874 NM_011591    | chrX  | 7052047 | 7053276 |
| X |    | 7029265 | 7043783 NM_145737    | chrX  | 7040161 | 7041264 |
| X |    | 7029265 | 7043783 NM_145737    | chrX  | 7035606 | 7037010 |
| X |    | 6992790 | 7001553 NM_138604    | chrX  | 6999505 | 7000685 |
| X |    | 6992790 | 7001553 NM_138604    | chrX  | 6997554 | 6998651 |

|   |    |         |                      |       |         |         |
|---|----|---------|----------------------|-------|---------|---------|
| X |    | 6974802 | 6983301 NM_008423    | chrX  | 6977972 | 6978793 |
|   | 14 | 6962001 | 6970527 NM_024221    | chr14 | 6964726 | 6965340 |
| X |    | 6940954 | 6949453 NM_207670    | chrX  | 6946907 | 6949409 |
| X |    | 6940954 | 6949453 NM_207670    | chrX  | 6946105 | 6946890 |
|   | 19 | 6905146 | 6918302 NM_019924    | chr19 | 6915198 | 6915864 |
| X |    | 6895747 | 6904283 NM_207202    | chrX  | 6903510 | 6904269 |
| X |    | 6873183 | 6888029 NM_172372    | chrX  | 6879318 | 6879925 |
| X |    | 6873183 | 6888029 NM_172372    | chrX  | 6878316 | 6878992 |
|   | 14 | 6866246 | 6874763 NM_025938    | chr14 | 6866601 | 6867208 |
|   | 6  | 6829409 | 6838082 NM_010056    | chr6  | 6833078 | 6833663 |
| X |    | 6825738 | 6834291 NM_019755    | chrX  | 6832180 | 6833297 |
| X |    | 6825738 | 6834291 NM_019755    | chrX  | 6830772 | 6831849 |
| X |    | 6789643 | 6799312 NM_009305    | chrX  | 6791977 | 6792574 |
| X |    | 6758062 | 6766562 NM_019582    | chrX  | 6761937 | 6762593 |
| X |    | 6759785 | 6768351 NM_138603    | chrX  | 6761937 | 6762593 |
| X |    | 6728647 | 6745316 NM_054039    | chrX  | 6740429 | 6741189 |
| X |    | 6728647 | 6745316 NM_054039    | chrX  | 6731578 | 6732633 |
| X |    | 6728647 | 6745316 NM_054039    | chrX  | 6727660 | 6728741 |
| X |    | 6577408 | 6585907 AF038507     | chrX  | 6585352 | 6585884 |
| X |    | 6577408 | 6585907 AF038507     | chrX  | 6584086 | 6584861 |
| X |    | 6577408 | 6585907 AF038507     | chrX  | 6579715 | 6580587 |
|   | 11 | 6552536 | 6561039 NM_019511    | chr11 | 6557155 | 6558511 |
|   | 11 | 6536132 | 6544652 NM_011709    | chr11 | 6537538 | 6538370 |
| X |    | 6530286 | 6538785 NM_019461    | chrX  | 6533210 | 6534020 |
|   | 15 | 6521086 | 6529593 NM_011815    | chr15 | 6526976 | 6527560 |
|   | 19 | 6378429 | 6386932 NM_011224    | chr19 | 6383597 | 6384359 |
|   | 11 | 6366372 | 6381920 NM_011221    | chr11 | 6374261 | 6374863 |
|   | 10 | 6359875 | 6368374 BC030437     | chr10 | 6367142 | 6367956 |
|   | 7  | 6328669 | 6337326 NM_021323    | chr7  | 6334280 | 6336329 |
|   | 7  | 6331991 | 6340505 NM_008817    | chr7  | 6334280 | 6336329 |
|   | 7  | 6317674 | 6327976 AF038939     | chr7  | 6321557 | 6322169 |
|   | 11 | 6309869 | 6318372 NM_008907    | chr11 | 6312399 | 6313085 |
|   | 11 | 6283367 | 6297689 NM_028601    | chr11 | 6295725 | 6296325 |
| X |    | 6218474 | 6227701 NM_001042542 | chrX  | 6219276 | 6219798 |
| X |    | 6196079 | 6204578 NM_183015    | chrX  | 6198437 | 6199015 |
|   | 18 | 6133597 | 6142096 NM_001039692 | chr18 | 6140220 | 6140958 |
|   | 18 | 6133597 | 6142096 NM_001039692 | chr18 | 6135786 | 6136475 |
|   | 18 | 6133597 | 6142096 NM_001039692 | chr18 | 6134658 | 6135365 |
|   | 18 | 6059438 | 6067937 BC024633     | chr18 | 6059537 | 6059953 |
|   | 11 | 5849835 | 5858388 NM_019661    | chr11 | 5855305 | 5855891 |
|   | 11 | 5796282 | 5804785 NM_022879    | chr11 | 5801098 | 5801686 |
|   | 2  | 5766086 | 5774585 AF222786     | chr2  | 5771528 | 5772173 |
|   | 7  | 5642248 | 5650747 AY596194     | chr7  | 5644927 | 5645544 |
| X |    | 5569621 | 5578120 NM_001040459 | chrX  | 5576565 | 5577391 |
|   | 19 | 5555052 | 5570573 NM_001033448 | chr19 | 5559771 | 5560395 |
|   | 19 | 5558058 | 5566646 NM_019935    | chr19 | 5559771 | 5560395 |
|   | 19 | 5484506 | 5493059 NM_007687    | chr19 | 5485240 | 5485826 |

|   |    |         |                      |       |         |         |
|---|----|---------|----------------------|-------|---------|---------|
|   | 19 | 5485652 | 5494339 NM_027877    | chr19 | 5485240 | 5485826 |
|   | 19 | 5468701 | 5477520 NM_021474    | chr19 | 5475730 | 5476292 |
|   | 11 | 5414644 | 5423469 NM_013842    | chr11 | 5420025 | 5420620 |
|   | 7  | 5404933 | 5414532 NM_030742    | chr7  | 5409571 | 5410704 |
|   | 17 | 5372695 | 5381249 NM_175349    | chr17 | 5373573 | 5374688 |
|   | 19 | 5363848 | 5372651 NM_001038231 | chr19 | 5370328 | 5370930 |
| X |    | 5345925 | 5354467 NM_001031664 | chrX  | 5349000 | 5349746 |
| X |    | 5345925 | 5354467 NM_001031664 | chrX  | 5345919 | 5346701 |
|   | 18 | 5331933 | 5340437 NM_178722    | chr18 | 5335103 | 5335719 |
| X |    | 5216983 | 5225736 NM_021431    | chrX  | 5217370 | 5217973 |
|   | 19 | 5142652 | 5151151 BC034670     | chr19 | 5148331 | 5149516 |
|   | 19 | 4833415 | 4841914 NM_207268    | chr19 | 4840553 | 4841137 |
|   | 19 | 4836788 | 4845322 NM_016892    | chr19 | 4840553 | 4841137 |
|   | 12 | 4826269 | 4834768 NM_025323    | chr12 | 4830138 | 4830735 |
|   | 19 | 4791352 | 4799877 NM_009032    | chr19 | 4798422 | 4799127 |
|   | 16 | 4792526 | 4801046 BC064081     | chr16 | 4795314 | 4795929 |
|   | 11 | 4789346 | 4802292 NM_172438    | chr11 | 4795094 | 4795704 |
|   | 6  | 4691306 | 4699879 NM_130877    | chr6  | 4695988 | 4696588 |
|   | 6  | 4694538 | 4703100 NM_011360    | chr6  | 4695988 | 4696588 |
|   | 11 | 4644281 | 4652781 NM_138948    | chr11 | 4650808 | 4651412 |
|   | 19 | 4612333 | 4621502 NM_153388    | chr19 | 4615508 | 4616188 |
|   | 19 | 4588361 | 4596860 NM_008797    | chr19 | 4588950 | 4589548 |
|   | 10 | 4535076 | 4543651 NM_025995    | chr10 | 4542370 | 4543241 |
|   | 2  | 4538026 | 4546525 BC046822     | chr2  | 4541017 | 4541696 |
|   | 9  | 4370612 | 4386034 NM_145609    | chr9  | 4382442 | 4382921 |
|   | 9  | 4370612 | 4386034 NM_145609    | chr9  | 4375629 | 4376276 |
|   | 1  | 4347850 | 4356473 NM_011283    | chr1  | 4349448 | 4350119 |
|   | 14 | 4277097 | 4285596 NM_025940    | chr14 | 4284495 | 4285139 |
|   | 8  | 4247080 | 4255601 NM_133968    | chr8  | 4251228 | 4251747 |
|   | 19 | 3973523 | 4005886 NM_001001320 | chr19 | 3990347 | 3991479 |
|   | 19 | 3973523 | 4005886 NM_001001320 | chr19 | 3987108 | 3987698 |
|   | 19 | 3973523 | 4005886 NM_001001320 | chr19 | 3978922 | 3979942 |
|   | 6  | 3947987 | 3956486 NM_025331    | chr6  | 3950259 | 3950846 |
|   | 6  | 3915855 | 3924359 NM_009364    | chr6  | 3920115 | 3920741 |
|   | 6  | 3915855 | 3924359 NM_009364    | chr6  | 3917155 | 3917948 |
|   | 4  | 3898226 | 3906728 BC080838     | chr4  | 3899806 | 3900525 |
|   | 5  | 3895406 | 3905939 NM_001013023 | chr5  | 3895602 | 3896219 |
|   | 12 | 3885758 | 3894257 NM_153743    | chr12 | 3893085 | 3893834 |
|   | 12 | 3800007 | 3809565 NM_007872    | chr12 | 3802805 | 3803376 |
|   | 7  | 3750355 | 3758959 NM_175529    | chr7  | 3751470 | 3752055 |
|   | 11 | 3619703 | 3632580 BC058356     | chr11 | 3624905 | 3625511 |
|   | 4  | 3599272 | 3607931 NM_010747    | chr4  | 3604453 | 3605176 |
|   | 12 | 3566523 | 3575540 NM_007886    | chr12 | 3570832 | 3571389 |
|   | 11 | 3544467 | 3562794 BC057363     | chr11 | 3547027 | 3547781 |
|   | 11 | 3544467 | 3562794 BC057363     | chr11 | 3545814 | 3546420 |
|   | 11 | 3544467 | 3562794 BC057363     | chr11 | 3544710 | 3545296 |
|   | 13 | 3531321 | 3540014 NM_008112    | chr13 | 3533666 | 3534284 |

|    |         |         |           |       |         |         |
|----|---------|---------|-----------|-------|---------|---------|
| 8  | 3487171 | 3503021 | NM_053177 | chr8  | 3495574 | 3496349 |
| 6  | 3441999 | 3450498 | NM_178899 | chr6  | 3445304 | 3445893 |
| 6  | 3442400 | 3450952 | NM_024260 | chr6  | 3445304 | 3445893 |
| 9  | 3329478 | 3340944 | NM_026303 | chr9  | 3339800 | 3340378 |
| 12 | 3307163 | 3315939 | NM_016676 | chr12 | 3308049 | 3308684 |
| 7  | 3278094 | 3286640 | NM_181820 | chr7  | 3281114 | 3281715 |
| 10 | 3128304 | 3136841 | NM_172546 | chr10 | 3132171 | 3132767 |
| 11 | 3090915 | 3099463 | BC046305  | chr11 | 3097688 | 3098373 |
| 11 | 3096395 | 3105264 | NM_023743 | chr11 | 3097688 | 3098373 |
| 11 | 3090915 | 3099463 | BC046305  | chr11 | 3092387 | 3092998 |
| 11 | 3042349 | 3050848 | BC048950  | chr11 | 3043951 | 3044989 |

| gene overlap percent | region overlap percent | length(bps) | probes in region | p-value(region) |
|----------------------|------------------------|-------------|------------------|-----------------|
| 0.0776471            | 1                      | 660         | 18               | 0.009622        |
| 0.0796054            | 1                      | 694         | 20               | 0.00744161      |
| 0.0397935            | 1                      | 663         | 19               | 0.00737981      |
| 0.0765324            | 1                      | 663         | 18               | 0.0072474       |
| 0.117834             | 1                      | 1003        | 21               | 0.00194206      |
| 0.0719282            | 1                      | 617         | 14               | 0.00941014      |
| 0.0633437            | 1                      | 976         | 26               | 0.00595858      |
| 0.0697647            | 1                      | 593         | 17               | 0.00574672      |
| 0.0819807            | 1                      | 697         | 13               | 0.00739747      |
| 0.0683006            | 1                      | 588         | 16               | 0.0087216       |
| 0.0543036            | 1                      | 641         | 18               | 0.00914532      |
| 0.0642996            | 1                      | 594         | 16               | 0.00888049      |
| 0.112396             | 1                      | 962         | 27               | 0.00173902      |
| 0.102922             | 1                      | 877         | 25               | 0.00685016      |
| 0.0974118            | 1                      | 828         | 23               | 0.00833319      |
| 0.0729412            | 1                      | 620         | 13               | 0.00904822      |
| 0.0894477            | 1                      | 779         | 13               | 0.00720326      |
| 0.072815             | 1                      | 619         | 18               | 0.00747692      |
| 0.0790546            | 1                      | 679         | 19               | 0.00802422      |
| 0.0729412            | 1                      | 620         | 17               | 0.00790946      |
| 0.0694541            | 1                      | 598         | 14               | 0.0089776       |
| 0.0707059            | 1                      | 601         | 11               | 0.00790064      |
| 0.0862353            | 1                      | 733         | 20               | 0.00821843      |
| 0.0716471            | 1                      | 609         | 16               | 0.005579        |
| 0.112706             | 1                      | 958         | 27               | 0.00466094      |
| 0.0695294            | 1                      | 591         | 17               | 0.00621458      |
| 0.107272             | 1                      | 922         | 25               | 0.00725623      |
| 0.0725882            | 1                      | 617         | 13               | 0.00549072      |
| 0.0714118            | 1                      | 607         | 11               | 0.00240991      |
| 0.0797885            | 1                      | 679         | 19               | 0.00535831      |
| 0.0726156            | 1                      | 804         | 22               | 0.00416659      |
| 0.0829628            | 1                      | 709         | 20               | 0.00495224      |
| 0.0770767            | 1                      | 656         | 19               | 0.00651472      |
| 0.0701176            | 1                      | 596         | 17               | 0.00935718      |
| 0.065861             | 1                      | 594         | 17               | 0.00742395      |
| 0.0716208            | 1                      | 612         | 17               | 0.00956904      |
| 0.0819193            | 1                      | 700         | 20               | 0.00935718      |
| 0.0871765            | 1                      | 741         | 21               | 0.00258647      |
| 0.150235             | 1                      | 1277        | 35               | 0.00480217      |
| 0.0807475            | 1                      | 687         | 17               | 0.0035928       |
| 0.0765729            | 1                      | 656         | 18               | 0.00629403      |
| 0.0749412            | 1                      | 637         | 17               | 0.00786533      |
| 0.103367             | 1                      | 881         | 24               | 0.00210095      |
| 0.0736471            | 1                      | 626         | 17               | 0.00564962      |

|           |          |      |    |            |
|-----------|----------|------|----|------------|
| 0.0924706 | 1        | 786  | 21 | 0.00650589 |
| 0.0892941 | 1        | 759  | 21 | 0.00686782 |
| 0.120353  | 1        | 1023 | 27 | 0.0014742  |
| 0.0771765 | 1        | 656  | 18 | 0.00737981 |
| 0.084103  | 1        | 774  | 21 | 0.0078565  |
| 0.139904  | 1        | 1198 | 32 | 0.00196854 |
| 0.0917647 | 1        | 780  | 22 | 0.00816546 |
| 0.0885734 | 1        | 755  | 20 | 0.00436963 |
| 0.0932727 | 1        | 800  | 22 | 0.00631168 |
| 0.071395  | 1        | 607  | 14 | 0.00821843 |
| 0.0690577 | 1        | 620  | 18 | 0.00780354 |
| 0.0868235 | 1        | 738  | 21 | 0.00790946 |
| 0.0787059 | 1        | 669  | 19 | 0.00450204 |
| 0.0923812 | 1        | 793  | 18 | 0.00780354 |
| 0.139212  | 1        | 1195 | 34 | 0.0074063  |
| 0.0987884 | 0.583219 | 1454 | 41 | 0.00327501 |
| 0.0758824 | 1        | 645  | 15 | 0.00647058 |
| 0.107176  | 1        | 911  | 24 | 0.00205681 |
| 0.0628377 | 1        | 535  | 13 | 0.00603803 |
| 0.100588  | 1        | 855  | 20 | 0.00609982 |
| 0.0616669 | 1        | 768  | 22 | 0.00580851 |
| 0.0526738 | 1        | 656  | 14 | 0.00694727 |
| 0.130821  | 1        | 1118 | 31 | 0.00200385 |
| 0.0749412 | 1        | 637  | 13 | 0.00354867 |
| 0.082404  | 1        | 702  | 20 | 0.00746809 |
| 0.065754  | 1        | 586  | 15 | 0.0076976  |
| 0.0829412 | 1        | 705  | 20 | 0.00199502 |
| 0.0754118 | 1        | 641  | 13 | 0.0054201  |
| 0.0752941 | 1        | 640  | 18 | 0.00660299 |
| 0.0702703 | 1        | 598  | 17 | 0.00752105 |
| 0.0700727 | 1        | 598  | 17 | 0.00752105 |
| 0.0493442 | 1        | 839  | 20 | 0.00657651 |
| 0.111955  | 1        | 1076 | 30 | 0.00159778 |
| 0.0624285 | 1        | 600  | 17 | 0.00939249 |
| 0.0769321 | 1        | 655  | 19 | 0.00752105 |
| 0.0862717 | 1        | 734  | 17 | 0.00564962 |
| 0.10067   | 1        | 871  | 24 | 0.00129765 |
| 0.0686765 | 1        | 590  | 16 | 0.00729154 |
| 0.0892795 | 1        | 767  | 22 | 0.0032397  |
| 0.0709934 | 1        | 606  | 12 | 0.00500521 |
| 0.245647  | 1        | 2088 | 55 | 0.00210095 |
| 0.107294  | 1        | 912  | 21 | 0.00149185 |
| 0.0699031 | 1        | 599  | 17 | 0.00967497 |
| 0.0631836 | 1        | 647  | 18 | 0.00794477 |
| 0.0712197 | 1        | 609  | 13 | 0.00905704 |
| 0.0518251 | 1        | 487  | 14 | 0.00547307 |
| 0.0887954 | 1        | 760  | 16 | 0.00639996 |

|           |   |      |    |            |
|-----------|---|------|----|------------|
| 0.120338  | 1 | 1026 | 29 | 0.00589679 |
| 0.120924  | 1 | 1031 | 17 | 0.00668244 |
| 0.0286301 | 1 | 627  | 17 | 0.00802422 |
| 0.0900552 | 1 | 767  | 19 | 0.00588796 |
| 0.0486656 | 1 | 682  | 13 | 0.00997511 |
| 0.0790816 | 1 | 682  | 13 | 0.00997511 |
| 0.0901444 | 1 | 793  | 21 | 0.00632051 |
| 0.0789412 | 1 | 671  | 15 | 0.00620575 |
| 0.0473618 | 1 | 719  | 20 | 0.00275419 |
| 0.0399183 | 1 | 606  | 11 | 0.00744161 |
| 0.0692558 | 1 | 617  | 16 | 0.0088187  |
| 0.101294  | 1 | 861  | 15 | 0.00639113 |
| 0.0876373 | 1 | 750  | 21 | 0.00828022 |
| 0.0539461 | 1 | 702  | 20 | 0.00640879 |
| 0.0809689 | 1 | 702  | 20 | 0.00640879 |
| 0.0644623 | 1 | 1004 | 29 | 0.00639996 |
| 0.0838523 | 1 | 1306 | 35 | 0.00135944 |
| 0.0505939 | 1 | 788  | 18 | 0.00500521 |
| 0.0758266 | 1 | 1181 | 31 | 0.00196854 |
| 0.0698824 | 1 | 594  | 17 | 0.00835967 |
| 0.0718824 | 1 | 611  | 17 | 0.00790946 |
| 0.10374   | 1 | 896  | 22 | 0.00180964 |
| 0.0716635 | 1 | 610  | 12 | 0.00861567 |
| 0.0789474 | 1 | 672  | 16 | 0.00843912 |
| 0.0700704 | 1 | 597  | 17 | 0.00884518 |
| 0.0717883 | 1 | 613  | 11 | 0.00828905 |
| 0.070555  | 1 | 600  | 17 | 0.00840381 |
| 0.223637  | 1 | 1915 | 53 | 0.00196854 |
| 0.120986  | 1 | 1036 | 29 | 0.00176551 |
| 0.109541  | 1 | 938  | 25 | 0.00680602 |
| 0.075908  | 1 | 650  | 17 | 0.00207447 |
| 0.0579404 | 1 | 494  | 11 | 0.00982504 |
| 0.0894118 | 1 | 760  | 22 | 0.00517293 |
| 0.225176  | 1 | 1914 | 43 | 0.00174785 |
| 0.12807   | 1 | 1090 | 26 | 0.0083685  |
| 0.0832648 | 1 | 709  | 19 | 0.00686782 |
| 0.0689129 | 1 | 587  | 12 | 0.0095249  |
| 0.0764451 | 1 | 652  | 18 | 0.00823608 |
| 0.0685882 | 1 | 583  | 17 | 0.00948077 |
| 0.0777713 | 1 | 663  | 18 | 0.00935718 |
| 0.0824165 | 1 | 869  | 24 | 0.0030455  |
| 0.129176  | 1 | 1098 | 29 | 0.00203033 |
| 0.0702816 | 1 | 604  | 11 | 0.00346922 |
| 0.0861542 | 1 | 733  | 15 | 0.00151833 |
| 0.107663  | 1 | 916  | 22 | 0.0019244  |
| 0.0834603 | 1 | 712  | 20 | 0.00399887 |
| 0.0956471 | 1 | 813  | 23 | 0.00671775 |

|           |   |      |    |            |
|-----------|---|------|----|------------|
| 0.0776288 | 1 | 660  | 18 | 0.00657651 |
| 0.0844548 | 1 | 866  | 19 | 0.00814781 |
| 0.150868  | 1 | 1547 | 37 | 0.00154482 |
| 0.057636  | 1 | 591  | 10 | 0.0095867  |
| 0.134586  | 1 | 1146 | 31 | 0.00730036 |
| 0.0541366 | 1 | 585  | 13 | 0.00898642 |
| 0.0499616 | 1 | 585  | 16 | 0.009878   |
| 0.0602955 | 1 | 706  | 20 | 0.00159778 |
| 0.0394436 | 1 | 672  | 19 | 0.00820077 |
| 0.195813  | 1 | 1665 | 45 | 0.00109461 |
| 0.0645882 | 1 | 549  | 16 | 0.00886284 |
| 0.108339  | 1 | 925  | 22 | 0.00588796 |
| 0.0798782 | 1 | 682  | 16 | 0.00210095 |
| 0.158345  | 1 | 1370 | 36 | 0.00735333 |
| 0.150105  | 1 | 1787 | 49 | 0.00175668 |
| 0.0971861 | 1 | 1157 | 29 | 0.00686782 |
| 0.170967  | 1 | 1630 | 45 | 0.00196854 |
| 0.0417353 | 1 | 608  | 15 | 0.00495224 |
| 0.0639758 | 1 | 932  | 22 | 0.00196854 |
| 0.0936289 | 1 | 870  | 23 | 0.00156247 |
| 0.121647  | 1 | 1034 | 29 | 0.00403418 |
| 0.254471  | 1 | 2163 | 60 | 0.00416659 |
| 0.129412  | 1 | 1100 | 31 | 0.00805071 |
| 0.104222  | 1 | 990  | 28 | 0.00747692 |
| 0.121381  | 1 | 1153 | 32 | 0.00354867 |
| 0.0889412 | 1 | 756  | 21 | 0.00631168 |
| 0.0705191 | 1 | 720  | 19 | 0.00752988 |
| 0.0862249 | 1 | 743  | 21 | 0.00262178 |
| 0.113564  | 1 | 967  | 27 | 0.00757402 |
| 0.0718824 | 1 | 611  | 17 | 0.00647058 |
| 0.0716471 | 1 | 609  | 17 | 0.0063823  |
| 0.13199   | 1 | 1133 | 27 | 0.00199502 |
| 0.0407983 | 1 | 601  | 16 | 0.00664713 |
| 0.0729412 | 1 | 620  | 18 | 0.00732685 |
| 0.0787172 | 1 | 729  | 20 | 0.0063823  |
| 0.0698741 | 1 | 594  | 17 | 0.0073445  |
| 0.0775294 | 1 | 659  | 17 | 0.00694727 |
| 0.0718824 | 1 | 611  | 17 | 0.00969263 |
| 0.090621  | 1 | 772  | 22 | 0.00758285 |
| 0.0393068 | 1 | 558  | 14 | 0.00828905 |
| 0.0431812 | 1 | 613  | 16 | 0.00658534 |
| 0.0755294 | 1 | 642  | 18 | 0.00924242 |
| 0.0363113 | 1 | 593  | 16 | 0.00765347 |
| 0.044961  | 1 | 617  | 17 | 0.00731802 |
| 0.0718824 | 1 | 611  | 14 | 0.00758285 |
| 0.0717052 | 1 | 611  | 14 | 0.00758285 |
| 0.044     | 1 | 374  | 11 | 0.00787415 |



|            |           |      |    |            |
|------------|-----------|------|----|------------|
| 0.0991425  | 1         | 844  | 24 | 0.00658534 |
| 0.0350721  | 1         | 591  | 14 | 0.00685899 |
| 0.0765438  | 1         | 652  | 19 | 0.00588796 |
| 0.135595   | 1         | 1155 | 33 | 0.00149185 |
| 0.07137    | 1         | 609  | 18 | 0.00657651 |
| 0.206235   | 1         | 1753 | 46 | 0.00790946 |
| 0.0936471  | 1         | 796  | 16 | 0.00146537 |
| 0.109414   | 1         | 931  | 26 | 0.00555251 |
| 0.224588   | 1         | 1909 | 49 | 0.00127116 |
| 0.0974118  | 1         | 828  | 23 | 0.0054819  |
| 0.0717647  | 1         | 610  | 17 | 0.00986918 |
| 0.0695928  | 1         | 593  | 17 | 0.00880104 |
| 0.101034   | 1         | 860  | 22 | 0.00624989 |
| 0.0458213  | 1         | 602  | 13 | 0.00841263 |
| 0.00607903 | 0.0863787 | 602  | 13 | 0.00841263 |
| 0.114652   | 1         | 975  | 26 | 0.0020833  |
| 0.112183   | 1         | 954  | 27 | 0.00162426 |
| 0.0768556  | 1         | 701  | 20 | 0.00700023 |
| 0.0393969  | 1         | 648  | 18 | 0.00624106 |
| 0.0536843  | 1         | 883  | 22 | 0.00123585 |
| 0.0709412  | 1         | 603  | 16 | 0.00908353 |
| 0.0705924  | 1         | 603  | 16 | 0.00908353 |
| 0.0848235  | 1         | 721  | 20 | 0.00409597 |
| 0.0844065  | 1         | 721  | 20 | 0.00409597 |
| 0.0368898  | 1         | 603  | 17 | 0.0097809  |
| 0.0697647  | 1         | 593  | 12 | 0.00945428 |
| 0.0722353  | 1         | 614  | 18 | 0.00959552 |
| 0.0760782  | 1         | 658  | 18 | 0.00941014 |
| 0.0422837  | 1         | 611  | 17 | 0.00884518 |
| 0.0716884  | 1         | 611  | 17 | 0.00884518 |
| 0.0883586  | 1         | 759  | 15 | 0.00607334 |
| 0.025732   | 1         | 377  | 10 | 0.00643527 |
| 0.065208   | 1         | 602  | 17 | 0.00686782 |
| 0.0707164  | 1         | 610  | 17 | 0.00636465 |
| 0.0495973  | 1         | 622  | 14 | 0.00685016 |
| 0.0693654  | 1         | 622  | 14 | 0.00685016 |
| 0.055946   | 1         | 605  | 17 | 0.00745043 |
| 0.07987    | 1         | 688  | 18 | 0.00783002 |
| 0.0908985  | 1         | 783  | 21 | 0.00181847 |
| 0.0671765  | 1         | 571  | 14 | 0.00423721 |
| 0.0475294  | 1         | 404  | 12 | 0.00902173 |
| 0.0704209  | 1         | 599  | 17 | 0.009622   |
| 0.0686987  | 1         | 586  | 16 | 0.00831553 |
| 0.10628    | 1         | 963  | 20 | 0.00739747 |
| 0.052627   | 1         | 600  | 16 | 0.00652354 |
| 0.08394    | 1         | 957  | 25 | 0.0013153  |
| 0.0538549  | 1         | 614  | 10 | 0.00607334 |

|           |           |      |    |            |
|-----------|-----------|------|----|------------|
| 0.102108  | 1         | 1080 | 27 | 0.00648823 |
| 0.118588  | 1         | 1008 | 28 | 0.00204799 |
| 0.0706228 | 1         | 601  | 17 | 0.009622   |
| 0.122353  | 1         | 1040 | 24 | 0.00210095 |
| 0.0689412 | 1         | 586  | 17 | 0.00913649 |
| 0.0721176 | 1         | 613  | 13 | 0.00752105 |
| 0.066518  | 1         | 1074 | 27 | 0.00829788 |
| 0.0693058 | 1         | 597  | 15 | 0.00936601 |
| 0.0221829 | 1         | 827  | 23 | 0.00749457 |
| 0.0980277 | 1         | 835  | 23 | 0.0063823  |
| 0.101802  | 1         | 870  | 23 | 0.00828905 |
| 0.102353  | 1         | 870  | 23 | 0.00828905 |
| 0.0721176 | 1         | 613  | 14 | 0.00809484 |
| 0.0695294 | 1         | 591  | 17 | 0.00880104 |
| 0.0403822 | 1         | 727  | 20 | 0.0076005  |
| 0.0415987 | 1         | 612  | 17 | 0.00947194 |
| 0.0381521 | 1         | 645  | 17 | 0.0074063  |
| 0.0424701 | 1         | 718  | 20 | 0.00632934 |
| 0.0695357 | 1         | 593  | 17 | 0.0096838  |
| 0.0627513 | 1         | 593  | 17 | 0.0096838  |
| 0.0920991 | 1         | 788  | 22 | 0.00436963 |
| 0.0801177 | 1         | 681  | 19 | 0.00735333 |
| 0.0449455 | 1         | 586  | 15 | 0.00911001 |
| 0.100755  | 1         | 867  | 24 | 0.00821843 |
| 0.0848235 | 1         | 721  | 20 | 0.00624106 |
| 0.067987  | 0.989882  | 593  | 17 | 0.00868629 |
| 0.0802353 | 1         | 682  | 13 | 0.00867746 |
| 0.137356  | 1         | 1170 | 28 | 0.00169488 |
| 0.115688  | 1         | 1028 | 25 | 0.00574672 |
| 0.0834118 | 1         | 709  | 19 | 0.00930421 |
| 0.0809412 | 1         | 688  | 18 | 0.0078565  |
| 0.125412  | 1         | 1066 | 25 | 0.00181847 |
| 0.0876966 | 1         | 747  | 21 | 0.00372522 |
| 0.0482621 | 0.550201  | 747  | 21 | 0.00372522 |
| 0.0686816 | 1         | 584  | 15 | 0.00998393 |
| 0.0705882 | 1         | 600  | 15 | 0.00854505 |
| 0.0727059 | 1         | 618  | 16 | 0.00669127 |
| 0.0468251 | 1         | 587  | 16 | 0.0060292  |
| 0.0719528 | 1         | 902  | 25 | 0.00386646 |
| 0.0623803 | 1         | 782  | 22 | 0.0073445  |
| 0.130026  | 1         | 1630 | 46 | 0.00185378 |
| 0.0502683 | 1         | 534  | 15 | 0.00737981 |
| 0.05545   | 1         | 613  | 13 | 0.00671775 |
| 0.006     | 0.0244253 | 2088 | 56 | 0.00201268 |
| 0.0695294 | 1         | 591  | 14 | 0.00717678 |
| 0.192588  | 1         | 1637 | 46 | 0.00758285 |
| 0.137529  | 1         | 1169 | 28 | 0.00707085 |

|           |          |      |    |            |
|-----------|----------|------|----|------------|
| 0.0672515 | 1        | 598  | 17 | 0.00677071 |
| 0.0585617 | 1        | 592  | 14 | 0.00767112 |
| 0.0771583 | 1        | 656  | 19 | 0.00674423 |
| 0.0851564 | 1        | 724  | 17 | 0.00686782 |
| 0.06337   | 1        | 824  | 22 | 0.00641761 |
| 0.12546   | 1        | 1092 | 23 | 0.00720326 |
| 0.0774357 | 1        | 674  | 19 | 0.00448438 |
| 0.0758605 | 1        | 648  | 11 | 0.00960435 |
| 0.0941232 | 1        | 804  | 19 | 0.00653237 |
| 0.118942  | 1        | 1016 | 22 | 0.00555251 |
| 0.0721143 | 1        | 616  | 13 | 0.00816546 |
| 0.072     | 1        | 612  | 11 | 0.00594093 |
| 0.0711111 | 1        | 608  | 17 | 0.00713264 |
| 0.0737647 | 1        | 627  | 18 | 0.00547307 |
| 0.148588  | 1        | 1263 | 34 | 0.00176551 |
| 0.0962353 | 0.992718 | 824  | 24 | 0.00355749 |
| 0.0363769 | 1        | 598  | 17 | 0.00969263 |
| 0.0722353 | 1        | 614  | 11 | 0.00619692 |
| 0.0661426 | 1        | 589  | 17 | 0.00742395 |
| 0.108302  | 1        | 938  | 25 | 0.00356632 |
| 0.109044  | 1        | 938  | 25 | 0.00356632 |
| 0.0699777 | 1        | 596  | 15 | 0.00865098 |
| 0.0818363 | 1        | 697  | 20 | 0.00973676 |
| 0.122941  | 1        | 1045 | 29 | 0.00765347 |
| 0.0623535 | 1        | 532  | 15 | 0.00115641 |
| 0.0972941 | 1        | 827  | 17 | 0.00151833 |
| 0.119294  | 1        | 1014 | 26 | 0.00137709 |
| 0.078143  | 1        | 813  | 17 | 0.00662947 |
| 0.0815182 | 1        | 741  | 18 | 0.00165075 |
| 0.0851485 | 1        | 774  | 21 | 0.00562313 |
| 0.0643564 | 1        | 585  | 17 | 0.00319556 |
| 0.103154  | 1        | 883  | 21 | 0.0015713  |
| 0.0837099 | 1        | 778  | 20 | 0.00546424 |
| 0.0703529 | 1        | 598  | 16 | 0.00135944 |
| 0.0687428 | 1        | 596  | 17 | 0.00963966 |
| 0.0738216 | 1        | 628  | 18 | 0.00604686 |
| 0.0729712 | 1        | 892  | 21 | 0.00788298 |
| 0.0481839 | 1        | 589  | 11 | 0.00939249 |
| 0.0703529 | 1        | 598  | 17 | 0.00949842 |
| 0.0882042 | 1        | 750  | 21 | 0.0063823  |
| 0.0726015 | 1        | 619  | 18 | 0.00615279 |
| 0.0725571 | 1        | 620  | 16 | 0.00869511 |
| 0.0384498 | 1        | 628  | 18 | 0.00775057 |
| 0.121656  | 1        | 1987 | 54 | 0.00205681 |
| 0.0364905 | 1        | 596  | 14 | 0.0094278  |
| 0.0455373 | 1        | 450  | 13 | 0.00850091 |
| 0.136102  | 1        | 1160 | 30 | 0.00508466 |

|           |          |      |    |            |
|-----------|----------|------|----|------------|
| 0.109703  | 1        | 935  | 24 | 0.00196854 |
| 0.0854159 | 1        | 728  | 21 | 0.00444907 |
| 0.0886908 | 1        | 756  | 20 | 0.00815664 |
| 0.21431   | 1        | 1866 | 45 | 0.00146537 |
| 0.0749412 | 1        | 637  | 18 | 0.0068943  |
| 0.0791765 | 1        | 673  | 19 | 0.00961318 |
| 0.0792941 | 1        | 674  | 15 | 0.00804188 |
| 0.0762353 | 1        | 648  | 18 | 0.00930421 |
| 0.0928235 | 1        | 789  | 21 | 0.00195971 |
| 0.131059  | 1        | 1114 | 27 | 0.00114758 |
| 0.0738824 | 1        | 628  | 13 | 0.00996628 |
| 0.0390364 | 1        | 619  | 16 | 0.00772409 |
| 0.0684238 | 1        | 797  | 23 | 0.00794477 |
| 0.0711172 | 1        | 620  | 17 | 0.00910118 |
| 0.0620228 | 1        | 528  | 10 | 0.00985152 |
| 0.0445837 | 1        | 619  | 18 | 0.00996628 |
| 0.0694118 | 1        | 590  | 10 | 0.00880104 |
| 0.0748914 | 1        | 638  | 17 | 0.00854505 |
| 0.072924  | 1        | 620  | 16 | 0.00809484 |
| 0.0705106 | 1        | 620  | 16 | 0.00809484 |
| 0.0433328 | 1        | 596  | 11 | 0.00930421 |
| 0.102941  | 1        | 875  | 24 | 0.00829788 |
| 0.0794118 | 1        | 675  | 18 | 0.00957787 |
| 0.0703529 | 1        | 598  | 15 | 0.00758285 |
| 0.081338  | 1        | 693  | 19 | 0.00442259 |
| 0.0453389 | 1        | 606  | 17 | 0.00888049 |
| 0.0430316 | 1        | 599  | 17 | 0.00880104 |
| 0.0428161 | 1        | 596  | 14 | 0.0090747  |
| 0.0684585 | 1        | 596  | 17 | 0.00553486 |
| 0.0747059 | 1        | 635  | 16 | 0.00664713 |
| 0.113882  | 1        | 968  | 27 | 0.00438728 |
| 0.0817066 | 1        | 699  | 20 | 0.00674423 |
| 0.0767059 | 1        | 652  | 17 | 0.00748574 |
| 0.0811316 | 1        | 694  | 19 | 0.00739747 |
| 0.0985981 | 1        | 844  | 21 | 0.00194206 |
| 0.076009  | 1        | 678  | 19 | 0.00507583 |
| 0.114471  | 1        | 973  | 23 | 0.00499638 |
| 0.113376  | 1        | 1769 | 40 | 0.00210095 |
| 0.208118  | 1        | 1769 | 40 | 0.00210095 |
| 0.0586426 | 1        | 915  | 21 | 0.00399887 |
| 0.107647  | 1        | 915  | 21 | 0.00399887 |
| 0.0572967 | 1        | 894  | 24 | 0.00489928 |
| 0.105176  | 1        | 894  | 24 | 0.00489928 |
| 0.0381978 | 1        | 596  | 17 | 0.00996628 |
| 0.0636471 | 0.907718 | 596  | 17 | 0.00996628 |
| 0.113325  | 1        | 967  | 27 | 0.00765347 |
| 0.0390005 | 1        | 334  | 10 | 0.00717678 |

|           |          |      |    |            |
|-----------|----------|------|----|------------|
| 0.0529163 | 1        | 450  | 13 | 0.00130647 |
| 0.0704553 | 1        | 605  | 17 | 0.00620575 |
| 0.0886311 | 1        | 764  | 22 | 0.00808601 |
| 0.0451835 | 1        | 629  | 17 | 0.00978973 |
| 0.0723529 | 1        | 615  | 13 | 0.0078565  |
| 0.0285113 | 1        | 447  | 13 | 0.00635582 |
| 0.0954118 | 1        | 811  | 16 | 0.00601155 |
| 0.137647  | 1        | 1170 | 32 | 0.00200385 |
| 0.0704679 | 1        | 613  | 14 | 0.00960435 |
| 0.0600279 | 1        | 516  | 15 | 0.00951608 |
| 0.0715878 | 1        | 610  | 16 | 0.00951608 |
| 0.0704143 | 1        | 600  | 17 | 0.00832436 |
| 0.0859292 | 1        | 731  | 21 | 0.00379584 |
| 0.0329569 | 1        | 855  | 23 | 0.00723857 |
| 0.0542353 | 1        | 461  | 13 | 0.00592327 |
| 0.0617647 | 1        | 525  | 15 | 0.00538479 |
| 0.0575294 | 1        | 489  | 13 | 0.00627637 |
| 0.072     | 1        | 612  | 15 | 0.00739747 |
| 0.0417647 | 1        | 355  | 10 | 0.00620575 |
| 0.0821176 | 1        | 698  | 20 | 0.00828905 |
| 0.116316  | 1        | 1172 | 32 | 0.00169488 |
| 0.0593489 | 1        | 598  | 17 | 0.00965731 |
| 0.0760193 | 1        | 647  | 18 | 0.00686782 |
| 0.143816  | 1        | 1629 | 45 | 0.00807719 |
| 0.065772  | 1        | 745  | 21 | 0.00609982 |
| 0.0527942 | 1        | 598  | 17 | 0.00661182 |
| 0.0839802 | 1        | 714  | 19 | 0.0054819  |
| 0.0303823 | 1        | 639  | 16 | 0.00720326 |
| 0.0767062 | 1        | 653  | 18 | 0.00546424 |
| 0.0718824 | 1        | 611  | 17 | 0.00402535 |
| 0.0717647 | 1        | 610  | 15 | 0.00727388 |
| 0.0855294 | 0.663321 | 1096 | 30 | 0.00140358 |
| 0.0550169 | 1        | 471  | 13 | 0.0087216  |
| 0.0411785 | 1        | 608  | 15 | 0.00783002 |
| 0.0464362 | 1        | 415  | 11 | 0.00604686 |
| 0.116704  | 1        | 1092 | 30 | 0.00135944 |
| 0.0691461 | 1        | 647  | 13 | 0.00409597 |
| 0.0870451 | 1        | 897  | 22 | 0.00653237 |
| 0.134692  | 1        | 1388 | 38 | 0.00197737 |
| 0.0938203 | 1        | 1377 | 34 | 0.00636465 |
| 0.0556653 | 1        | 817  | 20 | 0.00165075 |
| 0.117412  | 1        | 998  | 26 | 0.00828022 |
| 0.107859  | 1        | 925  | 22 | 0.00194206 |
| 0.0843433 | 1        | 1030 | 29 | 0.00186261 |
| 0.0673108 | 1        | 822  | 23 | 0.00178316 |
| 0.121986  | 1        | 1037 | 20 | 0.00172137 |
| 0.124809  | 0.998119 | 1063 | 27 | 0.0074063  |

|           |          |      |    |            |
|-----------|----------|------|----|------------|
| 0.0693336 | 1        | 591  | 17 | 0.00954256 |
| 0.0287156 | 0.433164 | 591  | 17 | 0.00954256 |
| 0.0802768 | 1        | 1044 | 29 | 0.00879222 |
| 0.0997325 | 1        | 1044 | 29 | 0.00879222 |
| 0.0622044 | 1        | 605  | 17 | 0.009622   |
| 0.0517493 | 1        | 673  | 19 | 0.00615279 |
| 0.0704308 | 1        | 600  | 14 | 0.00939249 |
| 0.085614  | 1        | 732  | 19 | 0.00467859 |
| 0.171647  | 1        | 1459 | 35 | 0.00755636 |
| 0.0982693 | 1        | 846  | 19 | 0.00165075 |
| 0.0801769 | 1        | 834  | 17 | 0.00650589 |
| 0.0895982 | 1        | 932  | 20 | 0.00241874 |
| 0.112478  | 1        | 1170 | 33 | 0.00188909 |
| 0.169579  | 1        | 1446 | 38 | 0.00151833 |
| 0.169798  | 1        | 1446 | 38 | 0.00151833 |
| 0.0609828 | 1        | 520  | 14 | 0.00876573 |
| 0.0610615 | 1        | 520  | 14 | 0.00876573 |
| 0.0690747 | 1        | 589  | 12 | 0.00746809 |
| 0.120329  | 1        | 1024 | 21 | 0.0036546  |
| 0.119738  | 1        | 1024 | 21 | 0.0036546  |
| 0.106071  | 1        | 912  | 24 | 0.00728271 |
| 0.0905288 | 1        | 779  | 17 | 0.0076976  |
| 0.0854801 | 1        | 730  | 17 | 0.00524355 |
| 0.0797618 | 1        | 683  | 13 | 0.00452852 |
| 0.0727059 | 1        | 618  | 13 | 0.00956904 |
| 0.067019  | 1        | 596  | 10 | 0.009878   |
| 0.0711765 | 1        | 605  | 17 | 0.00303667 |
| 0.108353  | 1        | 921  | 25 | 0.00203033 |
| 0.0738824 | 1        | 628  | 18 | 0.00744161 |
| 0.072     | 1        | 612  | 17 | 0.00951608 |
| 0.0738129 | 1        | 628  | 18 | 0.00763581 |
| 0.105991  | 1        | 904  | 24 | 0.00110344 |
| 0.0716379 | 1        | 611  | 13 | 0.00979856 |
| 0.109529  | 1        | 931  | 19 | 0.00645292 |
| 0.0696355 | 1        | 724  | 18 | 0.00299253 |
| 0.0803116 | 1        | 835  | 23 | 0.00413128 |
| 0.112322  | 1        | 969  | 26 | 0.00207447 |
| 0.114028  | 1        | 973  | 24 | 0.00165958 |
| 0.0857647 | 1        | 729  | 17 | 0.00869511 |
| 0.0842353 | 1        | 716  | 14 | 0.00747692 |
| 0.0705721 | 1        | 618  | 17 | 0.00816546 |
| 0.0783442 | 1        | 670  | 19 | 0.00672658 |
| 0.0758714 | 1        | 838  | 23 | 0.00194206 |
| 0.0782254 | 1        | 864  | 24 | 0.00774174 |
| 0.0847915 | 1        | 722  | 20 | 0.00686782 |
| 0.0707059 | 1        | 601  | 17 | 0.00692961 |
| 0.0782356 | 1        | 674  | 19 | 0.00778588 |

|           |          |      |    |            |
|-----------|----------|------|----|------------|
| 0.0597274 | 1        | 517  | 14 | 0.00981621 |
| 0.0725882 | 1        | 617  | 17 | 0.00996628 |
| 0.0724859 | 1        | 617  | 17 | 0.00996628 |
| 0.0801177 | 1        | 681  | 19 | 0.00722092 |
| 0.0485414 | 1        | 609  | 16 | 0.00749457 |
| 0.0732477 | 1        | 627  | 18 | 0.00963083 |
| 0.0711263 | 1        | 605  | 17 | 0.0092689  |
| 0.049329  | 1        | 522  | 10 | 0.00551721 |
| 0.0431405 | 1        | 733  | 17 | 0.0078565  |
| 0.0216451 | 1        | 801  | 23 | 0.00765347 |
| 0.119718  | 1        | 1020 | 25 | 0.00768878 |
| 0.12      | 1        | 1020 | 25 | 0.00768878 |
| 0.108451  | 1        | 924  | 25 | 0.00640879 |
| 0.050089  | 1        | 619  | 13 | 0.00744161 |
| 0.086     | 1        | 731  | 21 | 0.00655885 |
| 0.0809197 | 1        | 732  | 20 | 0.00134178 |
| 0.0712778 | 1        | 608  | 17 | 0.00718561 |
| 0.0717025 | 1        | 617  | 17 | 0.00945428 |
| 0.0486457 | 1        | 449  | 10 | 0.00733567 |
| 0.0623529 | 1        | 530  | 15 | 0.00721209 |
| 0.0381337 | 0.818868 | 530  | 15 | 0.00721209 |
| 0.0556271 | 1        | 475  | 13 | 0.0076976  |
| 0.0358356 | 0.445415 | 687  | 16 | 0.00829788 |
| 0.0693954 | 0.970395 | 608  | 17 | 0.00834201 |
| 0.0742394 | 1        | 632  | 18 | 0.00755636 |
| 0.0759317 | 1        | 654  | 19 | 0.00964849 |
| 0.0727059 | 1        | 618  | 17 | 0.00960435 |
| 0.0714369 | 1        | 610  | 15 | 0.00982504 |
| 0.0383361 | 1        | 623  | 11 | 0.00997511 |
| 0.0695043 | 1        | 645  | 16 | 0.0094278  |
| 0.0712941 | 1        | 606  | 12 | 0.00996628 |
| 0.0734118 | 1        | 624  | 17 | 0.0069914  |
| 0.0690263 | 1        | 587  | 15 | 0.00969263 |
| 0.0793184 | 1        | 675  | 19 | 0.00784767 |
| 0.0747059 | 1        | 635  | 18 | 0.00997511 |
| 0.0476734 | 1        | 752  | 21 | 0.00524355 |
| 0.0716471 | 1        | 609  | 17 | 0.00616161 |
| 0.0473268 | 1        | 694  | 20 | 0.00680602 |
| 0.0485566 | 1        | 693  | 19 | 0.00746809 |
| 0.119879  | 1        | 1027 | 28 | 0.00127116 |
| 0.0707059 | 1        | 601  | 17 | 0.00627637 |
| 0.0907059 | 1        | 771  | 21 | 0.00728271 |
| 0.0334723 | 1        | 827  | 23 | 0.00780354 |
| 0.0730708 | 1        | 642  | 11 | 0.00706202 |
| 0.0720428 | 1        | 620  | 18 | 0.00810367 |
| 0.0622353 | 0.998113 | 530  | 15 | 0.00940132 |
| 0.075008  | 1        | 702  | 20 | 0.00707085 |

|           |          |      |    |            |
|-----------|----------|------|----|------------|
| 0.0669943 | 1        | 627  | 16 | 0.0076005  |
| 0.096     | 1        | 816  | 19 | 0.00969263 |
| 0.0456002 | 1        | 754  | 18 | 0.00760933 |
| 0.0846262 | 1        | 720  | 19 | 0.00992214 |
| 0.0936471 | 1        | 796  | 20 | 0.00645292 |
| 0.0711263 | 1        | 605  | 17 | 0.00841263 |
| 0.07114   | 1        | 634  | 18 | 0.00799774 |
| 0.0562206 | 1        | 634  | 18 | 0.00733567 |
| 0.0715066 | 1        | 786  | 22 | 0.00579969 |
| 0.0895189 | 1        | 761  | 22 | 0.00935718 |
| 0.0722353 | 1        | 614  | 12 | 0.00956021 |
| 0.0838399 | 1        | 731  | 14 | 0.0064441  |
| 0.0765786 | 1        | 667  | 19 | 0.00508466 |
| 0.0723529 | 1        | 615  | 18 | 0.00935718 |
| 0.166491  | 1        | 1422 | 38 | 0.00201268 |
| 0.0725352 | 1        | 618  | 14 | 0.00816546 |
| 0.113372  | 1        | 1393 | 40 | 0.00609982 |
| 0.104527  | 1        | 889  | 23 | 0.00814781 |
| 0.070732  | 1        | 602  | 13 | 0.0090747  |
| 0.091314  | 1        | 779  | 22 | 0.00783002 |
| 0.0688235 | 1        | 585  | 14 | 0.0085627  |
| 0.0923529 | 1        | 785  | 22 | 0.00842146 |
| 0.0394242 | 1        | 619  | 15 | 0.00664713 |
| 0.0512465 | 1        | 444  | 13 | 0.00194206 |
| 0.118998  | 1        | 1031 | 23 | 0.00210978 |
| 0.185942  | 1        | 1611 | 42 | 0.00180964 |
| 0.0759697 | 1        | 662  | 15 | 0.00865098 |
| 0.0689412 | 1        | 586  | 15 | 0.00534948 |
| 0.0749412 | 1        | 637  | 18 | 0.00737981 |
| 0.128307  | 1        | 1096 | 31 | 0.00626754 |
| 0.0815968 | 1        | 697  | 19 | 0.00802422 |
| 0.0905374 | 1        | 775  | 22 | 0.00624106 |
| 0.0771765 | 1        | 656  | 19 | 0.00646175 |
| 0.100235  | 1        | 852  | 24 | 0.00839498 |
| 0.0715294 | 0.990228 | 614  | 16 | 0.00882753 |
| 0.0705882 | 1        | 600  | 16 | 0.00925125 |
| 0.0844527 | 1        | 723  | 20 | 0.0042637  |
| 0.069022  | 1        | 590  | 10 | 0.00832436 |
| 0.0854118 | 1        | 726  | 20 | 0.00703554 |
| 0.0682442 | 1        | 597  | 13 | 0.00685016 |
| 0.0505232 | 1        | 618  | 15 | 0.00880104 |
| 0.0723399 | 1        | 618  | 15 | 0.00880104 |
| 0.0849836 | 1        | 751  | 22 | 0.00840381 |
| 0.0750733 | 1        | 640  | 15 | 0.00852739 |
| 0.0696745 | 1        | 593  | 13 | 0.00905704 |
| 0.0595786 | 1        | 608  | 17 | 0.00852739 |
| 0.117882  | 1        | 1002 | 28 | 0.00677071 |



|           |   |      |    |            |
|-----------|---|------|----|------------|
| 0.0707059 | 1 | 601  | 17 | 0.00843912 |
| 0.0697647 | 1 | 593  | 17 | 0.00747692 |
| 0.0672381 | 1 | 604  | 17 | 0.00880104 |
| 0.0844394 | 1 | 738  | 17 | 0.00758285 |
| 0.0868031 | 1 | 738  | 17 | 0.00758285 |
| 0.0511116 | 1 | 446  | 12 | 0.0099398  |
| 0.0847537 | 1 | 721  | 16 | 0.00620575 |
| 0.048829  | 1 | 417  | 11 | 0.00694727 |
| 0.101176  | 1 | 860  | 24 | 0.00821843 |
| 0.04371   | 1 | 689  | 19 | 0.00772409 |
| 0.117176  | 1 | 996  | 28 | 0.00657651 |
| 0.051018  | 1 | 654  | 15 | 0.00965731 |
| 0.0722821 | 1 | 617  | 11 | 0.00722092 |
| 0.0731132 | 1 | 682  | 20 | 0.00596741 |
| 0.0695962 | 1 | 605  | 15 | 0.00717678 |
| 0.0689534 | 1 | 589  | 15 | 0.009878   |
| 0.0696471 | 1 | 592  | 17 | 0.00752105 |
| 0.0682218 | 1 | 582  | 17 | 0.00945428 |
| 0.0630943 | 1 | 637  | 18 | 0.00911001 |
| 0.0701176 | 1 | 596  | 13 | 0.00632934 |
| 0.0774254 | 1 | 664  | 17 | 0.00694727 |
| 0.0738824 | 1 | 628  | 17 | 0.00913649 |
| 0.0995294 | 1 | 846  | 24 | 0.00658534 |
| 0.0788091 | 1 | 675  | 19 | 0.00619692 |
| 0.072627  | 1 | 619  | 17 | 0.00760933 |
| 0.0703712 | 1 | 599  | 10 | 0.00631168 |
| 0.0847163 | 1 | 730  | 20 | 0.00786533 |
| 0.0316641 | 1 | 607  | 17 | 0.009878   |
| 0.07      | 1 | 595  | 17 | 0.00739747 |
| 0.0802412 | 1 | 692  | 18 | 0.0080154  |
| 0.112789  | 1 | 1001 | 28 | 0.00427252 |
| 0.0598824 | 1 | 509  | 14 | 0.00762698 |
| 0.0804664 | 1 | 697  | 14 | 0.00908353 |
| 0.120191  | 1 | 1034 | 28 | 0.00196854 |
| 0.0671651 | 1 | 575  | 14 | 0.00738864 |
| 0.0579206 | 1 | 683  | 15 | 0.00825374 |
| 0.0492998 | 1 | 683  | 15 | 0.00825374 |
| 0.0694786 | 1 | 593  | 17 | 0.009622   |
| 0.0936255 | 1 | 799  | 22 | 0.00760933 |
| 0.0704706 | 1 | 599  | 17 | 0.0082096  |
| 0.0816398 | 1 | 703  | 20 | 0.00165075 |
| 0.0679668 | 1 | 582  | 16 | 0.00697375 |
| 0.0655294 | 1 | 557  | 16 | 0.00954256 |
| 0.112118  | 1 | 953  | 27 | 0.00802422 |
| 0.115059  | 1 | 978  | 28 | 0.00730919 |
| 0.0618557 | 1 | 642  | 13 | 0.00680602 |
| 0.072     | 1 | 612  | 18 | 0.00690313 |

|           |          |      |    |            |
|-----------|----------|------|----|------------|
| 0.09      | 1        | 765  | 21 | 0.00674423 |
| 0.0695294 | 1        | 591  | 17 | 0.00896877 |
| 0.070196  | 1        | 598  | 17 | 0.00793595 |
| 0.117647  | 1        | 1000 | 28 | 0.00200385 |
| 0.0534057 | 1        | 748  | 21 | 0.00646175 |
| 0.0431514 | 0.529412 | 748  | 21 | 0.00646175 |
| 0.0737647 | 1        | 627  | 18 | 0.00813015 |
| 0.0703529 | 1        | 598  | 17 | 0.00770643 |
| 0.181882  | 1        | 1546 | 36 | 0.00150951 |
| 0.0734118 | 1        | 624  | 18 | 0.00803305 |
| 0.0832843 | 1        | 708  | 16 | 0.00686782 |
| 0.0703529 | 1        | 598  | 15 | 0.00955139 |
| 0.0493938 | 1        | 603  | 17 | 0.00572907 |
| 0.092     | 1        | 782  | 20 | 0.00732685 |
| 0.0919027 | 1        | 782  | 20 | 0.00732685 |
| 0.131182  | 1        | 1199 | 28 | 0.00496107 |
| 0.100411  | 1        | 855  | 22 | 0.00758285 |
| 0.0708235 | 1        | 602  | 17 | 0.0078565  |
| 0.123059  | 1        | 1046 | 25 | 0.00609982 |
| 0.0354669 | 1        | 763  | 20 | 0.00702671 |
| 0.0807059 | 1        | 686  | 19 | 0.00978973 |
| 0.0874884 | 1        | 751  | 20 | 0.00181847 |
| 0.084401  | 1        | 751  | 20 | 0.00181847 |
| 0.0689412 | 1        | 586  | 14 | 0.009622   |
| 0.0897647 | 1        | 763  | 21 | 0.00902173 |
| 0.0709428 | 1        | 605  | 17 | 0.00937483 |
| 0.0716376 | 1        | 612  | 17 | 0.00702671 |
| 0.0955294 | 0.99877  | 813  | 23 | 0.00640879 |
| 0.074     | 1        | 629  | 18 | 0.00764464 |
| 0.0762353 | 1        | 648  | 18 | 0.0078565  |
| 0.0742974 | 1        | 653  | 15 | 0.0095249  |
| 0.0710779 | 1        | 608  | 13 | 0.00950725 |
| 0.0727059 | 0.976303 | 633  | 16 | 0.00496107 |
| 0.0736732 | 1        | 633  | 16 | 0.00496107 |
| 0.0718824 | 1        | 611  | 16 | 0.00867746 |
| 0.0711127 | 1        | 611  | 16 | 0.00867746 |
| 0.164824  | 1        | 1401 | 39 | 0.00747692 |
| 0.0731765 | 1        | 622  | 16 | 0.00835084 |
| 0.0805965 | 1        | 935  | 25 | 0.00787415 |
| 0.0741    | 1        | 636  | 17 | 0.00616161 |
| 0.142724  | 1        | 1225 | 31 | 0.00181847 |
| 0.0883732 | 1        | 754  | 20 | 0.00768878 |
| 0.092     | 1        | 782  | 22 | 0.00631168 |
| 0.0851765 | 1        | 724  | 21 | 0.00688547 |
| 0.0528541 | 1        | 450  | 12 | 0.00888049 |
| 0.0587822 | 1        | 836  | 23 | 0.00766229 |
| 0.0983529 | 1        | 836  | 23 | 0.00766229 |

|           |          |     |    |            |
|-----------|----------|-----|----|------------|
| 0.0785882 | 1        | 668 | 17 | 0.00924242 |
| 0.0694118 | 1        | 590 | 17 | 0.00725623 |
| 0.104289  | 1        | 890 | 20 | 0.00186261 |
| 0.0694868 | 1        | 593 | 17 | 0.0068943  |
| 0.0767059 | 1        | 652 | 18 | 0.00631168 |
| 0.0665647 | 1        | 566 | 10 | 0.00993097 |
| 0.0744706 | 1        | 633 | 13 | 0.00609982 |
| 0.0774118 | 1        | 658 | 19 | 0.00733567 |
| 0.0842353 | 1        | 716 | 17 | 0.00630285 |
| 0.0709574 | 1        | 710 | 20 | 0.00668244 |
| 0.0285317 | 1        | 616 | 17 | 0.00802422 |
| 0.0275127 | 1        | 594 | 14 | 0.00905704 |
| 0.0609412 | 1        | 518 | 10 | 0.00892463 |
| 0.0378204 | 1        | 633 | 18 | 0.00778588 |
| 0.0620349 | 1        | 842 | 24 | 0.00842146 |
| 0.0414433 | 1        | 657 | 16 | 0.00880104 |
| 0.0845882 | 1        | 719 | 16 | 0.00747692 |
| 0.0737834 | 1        | 658 | 12 | 0.00669127 |
| 0.0703435 | 1        | 602 | 16 | 0.00691195 |
| 0.0885877 | 1        | 791 | 20 | 0.00786533 |
| 0.0568697 | 1        | 589 | 17 | 0.00803305 |
| 0.0979448 | 1        | 834 | 17 | 0.00661182 |
| 0.0696091 | 1        | 593 | 17 | 0.00675306 |
| 0.0710389 | 1        | 612 | 17 | 0.00768878 |
| 0.072     | 1        | 612 | 17 | 0.00768878 |
| 0.0731148 | 1        | 669 | 18 | 0.00717678 |
| 0.0698824 | 1        | 594 | 17 | 0.00890698 |
| 0.0891578 | 1        | 759 | 20 | 0.00181847 |
| 0.0972941 | 1        | 827 | 23 | 0.00686782 |
| 0.0924706 | 1        | 786 | 21 | 0.00604686 |
| 0.0767059 | 1        | 652 | 16 | 0.00786533 |
| 0.0573682 | 1        | 640 | 13 | 0.0081125  |
| 0.0874118 | 1        | 743 | 20 | 0.00719444 |
| 0.070591  | 1        | 608 | 13 | 0.00937483 |
| 0.061825  | 1        | 664 | 19 | 0.00744161 |
| 0.0553073 | 1        | 594 | 16 | 0.00744161 |
| 0.0404697 | 1        | 448 | 13 | 0.00930421 |
| 0.106308  | 1        | 905 | 25 | 0.00677071 |
| 0.0776869 | 1        | 712 | 20 | 0.00639996 |
| 0.0437139 | 1        | 960 | 25 | 0.00764464 |
| 0.046219  | 1        | 393 | 11 | 0.00981621 |
| 0.0709412 | 1        | 603 | 16 | 0.005579   |
| 0.0575294 | 0.796417 | 614 | 16 | 0.00674423 |
| 0.109412  | 1        | 930 | 19 | 0.0068943  |
| 0.0696471 | 1        | 592 | 15 | 0.00624106 |
| 0.0716791 | 1        | 613 | 12 | 0.00752988 |
| 0.0706905 | 1        | 602 | 11 | 0.0078565  |

|           |   |      |    |            |
|-----------|---|------|----|------------|
| 0.0856205 | 1 | 730  | 13 | 0.00555251 |
| 0.082634  | 1 | 709  | 20 | 0.00151833 |
| 0.0825882 | 1 | 702  | 18 | 0.00386646 |
| 0.0891765 | 1 | 758  | 21 | 0.00773291 |
| 0.0723599 | 1 | 616  | 17 | 0.00572907 |
| 0.0723769 | 1 | 616  | 17 | 0.00572907 |
| 0.0788206 | 1 | 671  | 19 | 0.00854505 |
| 0.03736   | 1 | 587  | 17 | 0.00905704 |
| 0.0629905 | 1 | 594  | 16 | 0.00937483 |
| 0.0464898 | 1 | 396  | 11 | 0.00700023 |
| 0.0714957 | 1 | 609  | 13 | 0.00941897 |
| 0.0794974 | 1 | 677  | 18 | 0.00557017 |
| 0.0718824 | 1 | 611  | 18 | 0.00729154 |
| 0.0877111 | 1 | 748  | 21 | 0.0068943  |
| 0.0791916 | 1 | 674  | 19 | 0.0054819  |
| 0.116438  | 1 | 991  | 26 | 0.00199502 |
| 0.0775467 | 1 | 660  | 18 | 0.00213626 |
| 0.0827059 | 1 | 703  | 20 | 0.00698257 |
| 0.0618247 | 1 | 618  | 16 | 0.00799774 |
| 0.0726631 | 1 | 618  | 16 | 0.00799774 |
| 0.0711864 | 1 | 609  | 17 | 0.00933952 |
| 0.0900901 | 1 | 770  | 22 | 0.00671775 |
| 0.0606497 | 1 | 1094 | 31 | 0.00832436 |
| 0.0705882 | 1 | 600  | 17 | 0.009622   |
| 0.0517742 | 1 | 785  | 21 | 0.00813015 |
| 0.104119  | 1 | 958  | 27 | 0.00802422 |
| 0.103765  | 1 | 882  | 25 | 0.00757402 |
| 0.0629412 | 1 | 535  | 12 | 0.00882753 |
| 0.0429133 | 1 | 644  | 13 | 0.00909235 |
| 0.0722353 | 1 | 614  | 14 | 0.00997511 |
| 0.132     | 1 | 1122 | 32 | 0.00787415 |
| 0.104795  | 1 | 896  | 23 | 0.005323   |
| 0.0385492 | 1 | 643  | 17 | 0.005323   |
| 0.0697019 | 1 | 594  | 17 | 0.00997511 |
| 0.125647  | 1 | 1068 | 30 | 0.00794477 |
| 0.0708235 | 1 | 602  | 13 | 0.00635582 |
| 0.106588  | 1 | 906  | 25 | 0.00201268 |
| 0.102343  | 1 | 904  | 25 | 0.00677071 |
| 0.116927  | 1 | 994  | 27 | 0.00431666 |
| 0.0615294 | 1 | 523  | 14 | 0.00707968 |
| 0.0362748 | 1 | 564  | 14 | 0.00780354 |
| 0.0342941 | 1 | 564  | 14 | 0.00780354 |
| 0.0858824 | 1 | 730  | 20 | 0.00737981 |
| 0.0663421 | 1 | 586  | 17 | 0.00912766 |
| 0.0603131 | 1 | 524  | 15 | 0.009622   |
| 0.075097  | 1 | 639  | 18 | 0.00551721 |
| 0.0822852 | 1 | 700  | 20 | 0.00837732 |

|           |          |      |    |            |
|-----------|----------|------|----|------------|
| 0.0851483 | 1        | 735  | 19 | 0.00307198 |
| 0.0712941 | 1        | 606  | 16 | 0.00982504 |
| 0.0802353 | 1        | 682  | 19 | 0.00710616 |
| 0.0831572 | 1        | 708  | 20 | 0.00786533 |
| 0.0831083 | 1        | 708  | 20 | 0.00786533 |
| 0.0952941 | 1        | 810  | 22 | 0.00804188 |
| 0.108941  | 1        | 926  | 27 | 0.00153599 |
| 0.0791765 | 1        | 673  | 19 | 0.00941014 |
| 0.117176  | 1        | 996  | 28 | 0.00210095 |
| 0.0743529 | 1        | 632  | 18 | 0.00671775 |
| 0.117176  | 1        | 996  | 28 | 0.00172137 |
| 0.121529  | 1        | 1033 | 29 | 0.00753871 |
| 0.0965323 | 1        | 824  | 21 | 0.00763581 |
| 0.0958585 | 1        | 824  | 21 | 0.00763581 |
| 0.046235  | 1        | 859  | 24 | 0.00737981 |
| 0.0639753 | 1        | 580  | 17 | 0.00880987 |
| 0.0669559 | 0.939145 | 608  | 17 | 0.00812133 |
| 0.111398  | 1        | 950  | 26 | 0.00508466 |
| 0.0975294 | 1        | 829  | 23 | 0.00634699 |
| 0.0258216 | 0.291918 | 829  | 23 | 0.00634699 |
| 0.0685841 | 1        | 589  | 12 | 0.00728271 |
| 0.0987424 | 1        | 848  | 20 | 0.00159778 |
| 0.0718824 | 1        | 611  | 17 | 0.00864215 |
| 0.112608  | 1        | 961  | 26 | 0.00283364 |
| 0.0705031 | 1        | 604  | 15 | 0.0085627  |
| 0.106989  | 0.998944 | 947  | 26 | 0.00686782 |
| 0.0836355 | 1        | 715  | 18 | 0.00730036 |
| 0.0724706 | 1        | 616  | 18 | 0.00880104 |
| 0.0811765 | 1        | 690  | 12 | 0.00829788 |
| 0.0702353 | 1        | 597  | 16 | 0.00793595 |
| 0.0712271 | 1        | 606  | 17 | 0.00978973 |
| 0.0739206 | 1        | 642  | 17 | 0.00841263 |
| 0.0892626 | 1        | 759  | 19 | 0.00720326 |
| 0.0932363 | 1        | 794  | 18 | 0.00831553 |
| 0.0335597 | 1        | 588  | 17 | 0.00677071 |
| 0.0684358 | 1        | 588  | 17 | 0.00677071 |
| 0.0325492 | 1        | 797  | 23 | 0.00540245 |
| 0.126353  | 1        | 1074 | 25 | 0.00774174 |
| 0.0364706 | 0.438472 | 707  | 20 | 0.00784767 |
| 0.0831765 | 1        | 707  | 20 | 0.00784767 |
| 0.0565706 | 1        | 483  | 13 | 0.0090747  |
| 0.338018  | 1        | 2886 | 78 | 0.00159778 |
| 0.0729412 | 1        | 620  | 15 | 0.0074063  |
| 0.0561257 | 1        | 782  | 22 | 0.00419308 |
| 0.0714118 | 1        | 607  | 17 | 0.00906587 |
| 0.0787808 | 1        | 672  | 19 | 0.00669127 |
| 0.0934272 | 1        | 796  | 20 | 0.00721209 |

|           |   |      |    |            |
|-----------|---|------|----|------------|
| 0.0705801 | 1 | 612  | 17 | 0.0092689  |
| 0.278588  | 1 | 2368 | 60 | 0.0019244  |
| 0.12192   | 1 | 1044 | 28 | 0.00203916 |
| 0.0677647 | 1 | 576  | 16 | 0.00619692 |
| 0.0972941 | 1 | 827  | 23 | 0.00803305 |
| 0.07106   | 1 | 606  | 17 | 0.00842146 |
| 0.0681304 | 1 | 602  | 17 | 0.00844794 |
| 0.0865882 | 1 | 736  | 19 | 0.00186261 |
| 0.0705882 | 1 | 600  | 17 | 0.00829788 |
| 0.0733427 | 1 | 624  | 14 | 0.00744161 |
| 0.114716  | 1 | 976  | 26 | 0.00210095 |
| 0.0702353 | 1 | 597  | 17 | 0.00886284 |
| 0.0743529 | 1 | 632  | 18 | 0.00664713 |
| 0.0756471 | 1 | 643  | 18 | 0.00392825 |
| 0.0456457 | 1 | 445  | 12 | 0.00737981 |
| 0.0520711 | 1 | 445  | 12 | 0.00737981 |
| 0.0602113 | 1 | 587  | 17 | 0.0090747  |
| 0.0577172 | 1 | 491  | 14 | 0.00903939 |
| 0.0924646 | 1 | 789  | 19 | 0.00682368 |
| 0.0978554 | 1 | 835  | 22 | 0.0064794  |
| 0.079419  | 1 | 678  | 18 | 0.00955139 |
| 0.0760742 | 1 | 648  | 12 | 0.00657651 |
| 0.0757647 | 1 | 644  | 15 | 0.0080154  |
| 0.0714118 | 1 | 607  | 10 | 0.00904822 |
| 0.101349  | 1 | 864  | 24 | 0.00717678 |
| 0.223765  | 1 | 1902 | 46 | 0.00181847 |
| 0.0782337 | 1 | 675  | 16 | 0.00565844 |
| 0.0487059 | 1 | 414  | 10 | 0.00949842 |
| 0.0717261 | 1 | 620  | 12 | 0.00829788 |
| 0.0687182 | 1 | 594  | 17 | 0.00737981 |
| 0.0704722 | 1 | 600  | 13 | 0.00752988 |
| 0.0722764 | 1 | 615  | 17 | 0.00905704 |
| 0.0851039 | 1 | 725  | 20 | 0.00790946 |
| 0.0696103 | 1 | 618  | 17 | 0.00784767 |
| 0.0657134 | 1 | 602  | 17 | 0.0092689  |
| 0.0708235 | 1 | 602  | 17 | 0.0092689  |
| 0.101765  | 1 | 865  | 24 | 0.00546424 |
| 0.0696471 | 1 | 592  | 17 | 0.00754754 |
| 0.0626876 | 1 | 543  | 15 | 0.00806836 |
| 0.139831  | 1 | 1195 | 29 | 0.00143006 |
| 0.105195  | 1 | 899  | 23 | 0.00484631 |
| 0.0769412 | 1 | 654  | 19 | 0.00498755 |
| 0.106569  | 1 | 962  | 24 | 0.00776822 |
| 0.0545975 | 1 | 687  | 19 | 0.00694727 |
| 0.116824  | 1 | 993  | 28 | 0.0019244  |
| 0.0688807 | 1 | 616  | 16 | 0.0060292  |
| 0.102471  | 1 | 871  | 24 | 0.00635582 |

|           |   |      |    |            |
|-----------|---|------|----|------------|
| 0.0921176 | 1 | 783  | 15 | 0.00688547 |
| 0.0195588 | 1 | 625  | 18 | 0.00829788 |
| 0.106878  | 1 | 909  | 25 | 0.00754754 |
| 0.0718472 | 1 | 613  | 16 | 0.00825374 |
| 0.116824  | 1 | 993  | 22 | 0.00728271 |
| 0.189647  | 1 | 1612 | 36 | 0.00146537 |
| 0.0547061 | 1 | 712  | 16 | 0.00745043 |
| 0.0629754 | 1 | 712  | 16 | 0.00745043 |
| 0.074     | 1 | 629  | 18 | 0.00729154 |
| 0.0609155 | 1 | 519  | 10 | 0.00841263 |
| 0.0535525 | 1 | 606  | 17 | 0.00668244 |
| 0.0706788 | 1 | 606  | 17 | 0.00668244 |
| 0.0315118 | 1 | 696  | 14 | 0.00309846 |
| 0.0691062 | 1 | 593  | 16 | 0.00752105 |
| 0.176471  | 1 | 1500 | 40 | 0.00200385 |
| 0.0595294 | 1 | 506  | 13 | 0.00994862 |
| 0.0905882 | 1 | 770  | 18 | 0.00829788 |
| 0.0711765 | 1 | 605  | 11 | 0.00933952 |
| 0.0647523 | 1 | 566  | 16 | 0.00975442 |
| 0.07      | 1 | 595  | 17 | 0.0089776  |
| 0.0866034 | 1 | 757  | 17 | 0.0083685  |
| 0.0741176 | 1 | 630  | 18 | 0.00746809 |
| 0.0875895 | 1 | 746  | 17 | 0.00458149 |
| 0.0396419 | 1 | 589  | 16 | 0.00888932 |
| 0.0830588 | 1 | 706  | 20 | 0.00813898 |
| 0.0849412 | 1 | 722  | 21 | 0.00661182 |
| 0.0848235 | 1 | 721  | 20 | 0.00652354 |
| 0.0855294 | 1 | 727  | 21 | 0.00650589 |
| 0.0882353 | 1 | 789  | 20 | 0.00325736 |
| 0.0643777 | 1 | 915  | 24 | 0.00784767 |
| 0.0269642 | 1 | 615  | 17 | 0.00530534 |
| 0.0296826 | 1 | 677  | 18 | 0.00799774 |
| 0.0606309 | 1 | 517  | 14 | 0.00880104 |
| 0.0622353 | 1 | 529  | 15 | 0.00787415 |
| 0.0703529 | 1 | 598  | 17 | 0.0082096  |
| 0.0690588 | 1 | 587  | 17 | 0.00983387 |
| 0.0709336 | 1 | 604  | 11 | 0.00994862 |
| 0.0695294 | 1 | 591  | 10 | 0.00844794 |
| 0.0491862 | 1 | 825  | 21 | 0.00635582 |
| 0.0689534 | 1 | 589  | 17 | 0.00894229 |
| 0.109882  | 1 | 934  | 24 | 0.00626754 |
| 0.0772941 | 1 | 657  | 18 | 0.00772409 |
| 0.0660449 | 1 | 786  | 22 | 0.00465211 |
| 0.0384818 | 1 | 585  | 17 | 0.00935718 |
| 0.0714958 | 1 | 608  | 17 | 0.00641761 |
| 0.101453  | 1 | 866  | 25 | 0.00557017 |
| 0.262184  | 1 | 2238 | 55 | 0.00207447 |

|            |          |      |    |            |
|------------|----------|------|----|------------|
| 0.112488   | 1        | 1625 | 45 | 0.00790946 |
| 0.0769773  | 1        | 655  | 18 | 0.00971028 |
| 0.0858752  | 1        | 732  | 21 | 0.00733567 |
| 0.0701176  | 1        | 596  | 12 | 0.00766229 |
| 0.07058    | 1        | 606  | 17 | 0.00579969 |
| 0.0846693  | 1        | 845  | 24 | 0.00690313 |
| 0.0872941  | 1        | 742  | 16 | 0.00746809 |
| 0.0804114  | 0.99422  | 692  | 19 | 0.00659416 |
| 0.0978363  | 1        | 832  | 20 | 0.00489045 |
| 0.0661138  | 1        | 566  | 14 | 0.00770643 |
| 0.0631936  | 1        | 541  | 15 | 0.00772409 |
| 0.0208235  | 0.287338 | 616  | 16 | 0.0093307  |
| 0.106471   | 1        | 905  | 25 | 0.00153599 |
| 0.0400286  | 1        | 615  | 18 | 0.00867746 |
| 0.0715294  | 1        | 608  | 14 | 0.00832436 |
| 0.0770403  | 1        | 657  | 18 | 0.00496107 |
| 0.0581877  | 1        | 829  | 23 | 0.00658534 |
| 0.0847059  | 1        | 720  | 17 | 0.00524355 |
| 0.0355734  | 1        | 604  | 16 | 0.00783002 |
| 0.0439241  | 1        | 604  | 16 | 0.00783002 |
| 0.0803571  | 1        | 684  | 19 | 0.00587913 |
| 0.093985   | 1        | 800  | 21 | 0.00395473 |
| 0.114598   | 1        | 975  | 24 | 0.00325736 |
| 0.00957358 | 1        | 599  | 12 | 0.00829788 |
| 0.0706739  | 1        | 602  | 14 | 0.00666478 |
| 0.0827262  | 1        | 704  | 20 | 0.00670009 |
| 0.115176   | 1        | 979  | 27 | 0.00664713 |
| 0.0572941  | 0.697708 | 698  | 17 | 0.00722092 |
| 0.0725882  | 1        | 617  | 16 | 0.00905704 |
| 0.072      | 1        | 612  | 17 | 0.00949842 |
| 0.0717363  | 1        | 616  | 16 | 0.00950725 |
| 0.0732056  | 1        | 665  | 19 | 0.0083067  |
| 0.0707154  | 1        | 602  | 16 | 0.00597624 |
| 0.0626407  | 1        | 612  | 17 | 0.00884518 |
| 0.119345   | 1        | 1166 | 29 | 0.00135944 |
| 0.0508791  | 1        | 599  | 10 | 0.00969263 |
| 0.0504544  | 1        | 594  | 11 | 0.00758285 |
| 0.0374479  | 1        | 422  | 10 | 0.00634699 |
| 0.102826   | 1        | 877  | 24 | 0.00489928 |
| 0.0784706  | 1        | 667  | 19 | 0.00879222 |
| 0.0601176  | 1        | 511  | 15 | 0.00758285 |
| 0.0698824  | 1        | 594  | 17 | 0.00700023 |
| 0.101686   | 1        | 965  | 27 | 0.0075034  |
| 0.00941176 | 0.13267  | 603  | 16 | 0.00848325 |
| 0.0771307  | 1        | 686  | 19 | 0.00476687 |
| 0.0856757  | 1        | 762  | 20 | 0.00588796 |
| 0.0222353  | 0.386503 | 489  | 11 | 0.0096838  |



|           |   |      |    |            |
|-----------|---|------|----|------------|
| 0.074603  | 1 | 653  | 18 | 0.0083685  |
| 0.0837056 | 1 | 712  | 17 | 0.00674423 |
| 0.0698331 | 1 | 594  | 17 | 0.00815664 |
| 0.0661176 | 1 | 562  | 12 | 0.0079536  |
| 0.12      | 1 | 1020 | 29 | 0.00771526 |
| 0.0738824 | 1 | 628  | 18 | 0.00560548 |
| 0.0736471 | 1 | 626  | 18 | 0.00819195 |
| 0.0989412 | 1 | 841  | 23 | 0.00497873 |
| 0.0696471 | 1 | 592  | 16 | 0.00873925 |
| 0.0696471 | 1 | 592  | 17 | 0.00389294 |
| 0.0834108 | 1 | 718  | 21 | 0.00200385 |
| 0.0836431 | 1 | 720  | 19 | 0.00608217 |
| 0.0698188 | 1 | 601  | 12 | 0.00194206 |
| 0.0359829 | 1 | 598  | 17 | 0.00854505 |
| 0.0703529 | 1 | 598  | 17 | 0.00854505 |
| 0.0673785 | 1 | 650  | 18 | 0.00629403 |
| 0.075599  | 1 | 650  | 18 | 0.00629403 |
| 0.0722353 | 1 | 614  | 16 | 0.00834201 |
| 0.0867059 | 1 | 737  | 21 | 0.00768878 |
| 0.0751216 | 1 | 664  | 19 | 0.00694727 |
| 0.0629988 | 1 | 592  | 17 | 0.00930421 |
| 0.102706  | 1 | 873  | 23 | 0.00653237 |
| 0.0754118 | 1 | 641  | 18 | 0.00697375 |
| 0.122458  | 1 | 1060 | 24 | 0.00670892 |
| 0.0451022 | 1 | 384  | 11 | 0.00761816 |
| 0.0735447 | 1 | 638  | 18 | 0.00803305 |
| 0.0660587 | 1 | 565  | 16 | 0.00924242 |
| 0.0857478 | 1 | 731  | 20 | 0.00589679 |
| 0.049872  | 1 | 799  | 22 | 0.00664713 |
| 0.0599214 | 1 | 960  | 27 | 0.00135061 |
| 0.0513289 | 1 | 786  | 20 | 0.00504935 |
| 0.0635408 | 1 | 973  | 23 | 0.00680602 |
| 0.0616323 | 1 | 586  | 14 | 0.00674423 |
| 0.0686343 | 1 | 586  | 14 | 0.00674423 |
| 0.123176  | 1 | 1047 | 27 | 0.00300136 |
| 0.108601  | 1 | 947  | 27 | 0.00796243 |
| 0.102179  | 1 | 891  | 22 | 0.00153599 |
| 0.0829217 | 1 | 705  | 21 | 0.00324853 |
| 0.102941  | 1 | 875  | 25 | 0.00837732 |
| 0.0898551 | 1 | 775  | 21 | 0.00717678 |
| 0.103882  | 1 | 883  | 21 | 0.00804188 |
| 0.141816  | 1 | 1206 | 28 | 0.00123585 |
| 0.0430686 | 1 | 608  | 15 | 0.00624106 |
| 0.0742904 | 1 | 636  | 18 | 0.00812133 |
| 0.0716972 | 1 | 610  | 12 | 0.00945428 |
| 0.125294  | 1 | 1065 | 27 | 0.00501404 |
| 0.0724706 | 1 | 616  | 17 | 0.00643527 |

|           |          |      |    |            |
|-----------|----------|------|----|------------|
| 0.0778534 | 1        | 663  | 19 | 0.00969263 |
| 0.0425556 | 1        | 379  | 11 | 0.00957787 |
| 0.0444262 | 1        | 379  | 11 | 0.00957787 |
| 0.0736582 | 1        | 656  | 18 | 0.00786533 |
| 0.076896  | 1        | 656  | 18 | 0.00786533 |
| 0.127554  | 1        | 1136 | 27 | 0.00127116 |
| 0.0254366 | 0.191021 | 1136 | 27 | 0.00127116 |
| 0.0701176 | 1        | 596  | 17 | 0.00960435 |
| 0.070027  | 1        | 596  | 17 | 0.00960435 |
| 0.119637  | 1        | 1054 | 30 | 0.00209212 |
| 0.0797647 | 1        | 678  | 19 | 0.00772409 |
| 0.0705882 | 1        | 600  | 17 | 0.00985152 |
| 0.0725882 | 1        | 617  | 13 | 0.00376053 |
| 0.0676743 | 1        | 591  | 17 | 0.00504935 |
| 0.128941  | 1        | 1096 | 28 | 0.00629403 |
| 0.0889412 | 1        | 756  | 19 | 0.00617927 |
| 0.0896471 | 1        | 762  | 18 | 0.00742395 |
| 0.0610797 | 1        | 594  | 17 | 0.00939249 |
| 0.0557989 | 1        | 484  | 10 | 0.00662947 |
| 0.0869412 | 1        | 739  | 21 | 0.00648823 |
| 0.0712941 | 1        | 606  | 17 | 0.00627637 |
| 0.0780549 | 1        | 679  | 15 | 0.00380466 |
| 0.035737  | 1        | 619  | 17 | 0.00691195 |
| 0.0738824 | 1        | 628  | 18 | 0.0044579  |
| 0.0915385 | 1        | 780  | 21 | 0.00680602 |
| 0.07      | 1        | 595  | 16 | 0.00925125 |
| 0.0389964 | 1        | 645  | 18 | 0.00912766 |
| 0.083268  | 1        | 743  | 14 | 0.00397239 |
| 0.0874118 | 1        | 743  | 14 | 0.00397239 |
| 0.0545882 | 1        | 464  | 11 | 0.00677071 |
| 0.0611184 | 1        | 882  | 20 | 0.00360163 |
| 0.124681  | 1        | 1123 | 30 | 0.00752105 |
| 0.0727059 | 1        | 618  | 17 | 0.00703554 |
| 0.126013  | 1        | 1135 | 31 | 0.00492576 |
| 0.0768291 | 1        | 692  | 19 | 0.00719444 |
| 0.0581959 | 1        | 720  | 19 | 0.00608217 |
| 0.141882  | 1        | 1206 | 33 | 0.00165075 |
| 0.0347914 | 1        | 587  | 17 | 0.00941014 |
| 0.110891  | 1        | 950  | 26 | 0.00658534 |
| 0.0563063 | 1        | 950  | 26 | 0.00658534 |
| 0.069938  | 1        | 620  | 11 | 0.00721209 |
| 0.0518895 | 1        | 460  | 13 | 0.00799774 |
| 0.0577614 | 1        | 691  | 20 | 0.0039106  |
| 0.0921415 | 1        | 802  | 23 | 0.00696492 |
| 0.0792723 | 1        | 719  | 20 | 0.00778588 |
| 0.0800635 | 1        | 706  | 17 | 0.00588796 |
| 0.0880488 | 1        | 750  | 21 | 0.0083685  |

|           |   |      |    |            |
|-----------|---|------|----|------------|
| 0.084     | 1 | 714  | 19 | 0.00759167 |
| 0.0620847 | 1 | 598  | 10 | 0.00901291 |
| 0.0723529 | 1 | 615  | 11 | 0.00725623 |
| 0.0838824 | 1 | 713  | 20 | 0.00992214 |
| 0.0460701 | 1 | 609  | 17 | 0.00969263 |
| 0.0792941 | 1 | 674  | 19 | 0.00813898 |
| 0.0693825 | 1 | 591  | 12 | 0.0097809  |
| 0.0887059 | 1 | 754  | 20 | 0.00755636 |
| 0.0728235 | 1 | 619  | 16 | 0.00717678 |
| 0.101766  | 1 | 893  | 25 | 0.00819195 |
| 0.0701176 | 1 | 596  | 17 | 0.00712381 |
| 0.0834211 | 1 | 713  | 20 | 0.00853622 |
| 0.0676099 | 1 | 583  | 16 | 0.00930421 |
| 0.0686536 | 1 | 592  | 15 | 0.00657651 |
| 0.0663379 | 1 | 565  | 16 | 0.00784767 |
| 0.0680856 | 1 | 579  | 14 | 0.00815664 |
| 0.0726717 | 1 | 618  | 18 | 0.00813015 |
| 0.077916  | 1 | 664  | 19 | 0.00213626 |
| 0.0665882 | 1 | 566  | 10 | 0.00757402 |
| 0.0693324 | 1 | 619  | 17 | 0.00892463 |
| 0.0688696 | 1 | 619  | 17 | 0.00892463 |
| 0.058659  | 1 | 629  | 18 | 0.00690313 |
| 0.0886301 | 1 | 799  | 22 | 0.00969263 |
| 0.0986624 | 1 | 981  | 25 | 0.00761816 |
| 0.0500338 | 1 | 592  | 17 | 0.00832436 |
| 0.0904706 | 1 | 769  | 21 | 0.00732685 |
| 0.0514749 | 1 | 616  | 15 | 0.00963966 |
| 0.075831  | 1 | 657  | 19 | 0.00507583 |
| 0.0764081 | 1 | 662  | 18 | 0.0066383  |
| 0.0835018 | 1 | 826  | 19 | 0.00665596 |
| 0.0754118 | 1 | 641  | 18 | 0.00720326 |
| 0.0724706 | 1 | 616  | 13 | 0.00629403 |
| 0.0899841 | 1 | 849  | 24 | 0.00797126 |
| 0.117412  | 1 | 998  | 28 | 0.00730919 |
| 0.0768235 | 1 | 653  | 19 | 0.00680602 |
| 0.0792941 | 1 | 674  | 19 | 0.00737981 |
| 0.0694118 | 1 | 590  | 17 | 0.00880104 |
| 0.118608  | 1 | 1009 | 29 | 0.00207447 |
| 0.0707059 | 1 | 601  | 17 | 0.00904822 |
| 0.0705979 | 1 | 601  | 17 | 0.00904822 |
| 0.0859421 | 1 | 733  | 21 | 0.0064794  |
| 0.0787032 | 1 | 670  | 14 | 0.00128882 |
| 0.125969  | 1 | 1073 | 22 | 0.00204799 |
| 0.0683971 | 1 | 585  | 16 | 0.00849208 |
| 0.0688207 | 1 | 590  | 17 | 0.00590562 |
| 0.101365  | 1 | 869  | 24 | 0.00190675 |
| 0.0628189 | 1 | 591  | 13 | 0.00772409 |

|           |          |      |    |            |
|-----------|----------|------|----|------------|
| 0.0787999 | 1        | 675  | 19 | 0.00743278 |
| 0.0658064 | 1        | 561  | 13 | 0.00947194 |
| 0.0650693 | 1        | 554  | 14 | 0.00949842 |
| 0.0856237 | 1        | 729  | 20 | 0.00825374 |
| 0.0545018 | 1        | 681  | 19 | 0.00504052 |
| 0.0492215 | 1        | 607  | 17 | 0.00772409 |
| 0.104     | 1        | 884  | 23 | 0.00796243 |
| 0.0777687 | 1        | 665  | 19 | 0.00722092 |
| 0.118118  | 1        | 1004 | 28 | 0.00766229 |
| 0.11469   | 1        | 1004 | 28 | 0.00766229 |
| 0.0785236 | 1        | 668  | 14 | 0.00627637 |
| 0.0694395 | 1        | 591  | 16 | 0.00874808 |
| 0.0724166 | 1        | 623  | 17 | 0.00282481 |
| 0.0734857 | 1        | 643  | 18 | 0.00604686 |
| 0.119886  | 1        | 1049 | 29 | 0.00429018 |
| 0.0623387 | 1        | 604  | 17 | 0.00777705 |
| 0.0800988 | 1        | 681  | 19 | 0.00685016 |
| 0.0796864 | 1        | 681  | 19 | 0.00685016 |
| 0.0842508 | 1        | 727  | 17 | 0.00122703 |
| 0.0761735 | 1        | 727  | 17 | 0.00122703 |
| 0.0724706 | 1        | 616  | 15 | 0.00623224 |
| 0.0765882 | 1        | 651  | 18 | 0.00690313 |
| 0.0218675 | 1        | 596  | 11 | 0.0085627  |
| 0.0507882 | 1        | 596  | 11 | 0.0085627  |
| 0.0998944 | 1        | 851  | 23 | 0.00624989 |
| 0.109765  | 1        | 933  | 24 | 0.0061881  |
| 0.082342  | 1        | 706  | 20 | 0.00544658 |
| 0.0267645 | 0.537415 | 441  | 13 | 0.00842146 |
| 0.121905  | 1        | 1098 | 23 | 0.00619692 |
| 0.0558824 | 1        | 475  | 13 | 0.0078565  |
| 0.0485379 | 1        | 893  | 25 | 0.00183613 |
| 0.0851308 | 1        | 1113 | 25 | 0.00670892 |
| 0.113502  | 1        | 1113 | 25 | 0.00670892 |
| 0.0335313 | 1        | 559  | 16 | 0.00963966 |
| 0.0741176 | 1        | 630  | 18 | 0.00853622 |
| 0.0694036 | 1        | 590  | 17 | 0.00871277 |
| 0.0715294 | 1        | 608  | 17 | 0.009622   |
| 0.0963529 | 1        | 819  | 19 | 0.00562313 |
| 0.0823529 | 1        | 700  | 16 | 0.00262178 |
| 0.121412  | 1        | 1032 | 29 | 0.00139475 |
| 0.0707059 | 1        | 601  | 17 | 0.00990449 |
| 0.168588  | 1        | 1433 | 40 | 0.00188909 |
| 0.0829967 | 1        | 719  | 17 | 0.00531417 |
| 0.0324887 | 1        | 659  | 19 | 0.00833319 |
| 0.104189  | 1        | 888  | 19 | 0.00609982 |
| 0.0890532 | 1        | 759  | 21 | 0.00803305 |
| 0.105831  | 1        | 902  | 20 | 0.00868629 |

|           |         |      |    |            |
|-----------|---------|------|----|------------|
| 0.0709412 | 1       | 603  | 17 | 0.00956904 |
| 0.0675379 | 1       | 584  | 14 | 0.00963966 |
| 0.0701176 | 1       | 596  | 15 | 0.00649706 |
| 0.137987  | 1       | 1190 | 32 | 0.00414894 |
| 0.0728235 | 1       | 619  | 16 | 0.00911001 |
| 0.0705882 | 1       | 600  | 15 | 0.00629403 |
| 0.0378083 | 0.53542 | 607  | 17 | 0.0078565  |
| 0.0410017 | 1       | 614  | 17 | 0.0095867  |
| 0.0731735 | 1       | 641  | 18 | 0.00721209 |
| 0.0658824 | 1       | 560  | 16 | 0.00747692 |
| 0.0622369 | 1       | 621  | 18 | 0.00737981 |
| 0.0729119 | 1       | 632  | 18 | 0.00722092 |
| 0.0745882 | 1       | 634  | 18 | 0.00865098 |
| 0.0687398 | 1       | 588  | 17 | 0.00735333 |
| 0.0702353 | 1       | 597  | 17 | 0.00971911 |
| 0.0820115 | 1       | 698  | 11 | 0.00807719 |
| 0.0419905 | 1       | 643  | 16 | 0.00534065 |
| 0.0457871 | 1       | 676  | 19 | 0.0067354  |
| 0.0413167 | 1       | 610  | 16 | 0.00720326 |
| 0.0306417 | 1       | 806  | 23 | 0.00829788 |
| 0.0758824 | 1       | 645  | 18 | 0.00896877 |
| 0.0869228 | 1       | 785  | 17 | 0.00717678 |
| 0.0297365 | 1       | 719  | 20 | 0.00636465 |
| 0.140824  | 1       | 1197 | 29 | 0.00129765 |
| 0.0754118 | 1       | 641  | 12 | 0.00684133 |
| 0.0819765 | 1       | 725  | 19 | 0.0076976  |
| 0.112183  | 1       | 954  | 22 | 0.00729154 |
| 0.103765  | 1       | 882  | 23 | 0.00647058 |
| 0.0887059 | 1       | 754  | 21 | 0.00563196 |
| 0.0724178 | 1       | 617  | 17 | 0.00963966 |
| 0.0702868 | 1       | 598  | 17 | 0.00730919 |
| 0.0711765 | 1       | 605  | 12 | 0.00841263 |
| 0.0703529 | 1       | 598  | 11 | 0.0092689  |
| 0.0682353 | 1       | 580  | 12 | 0.0094278  |
| 0.0731902 | 1       | 641  | 17 | 0.00794477 |
| 0.114376  | 1       | 977  | 24 | 0.00124468 |
| 0.081831  | 1       | 699  | 20 | 0.00658534 |
| 0.0720075 | 1       | 613  | 17 | 0.00703554 |
| 0.0590104 | 1       | 613  | 17 | 0.00703554 |
| 0.0655324 | 1       | 701  | 20 | 0.00594975 |
| 0.122487  | 1       | 1042 | 24 | 0.00653237 |
| 0.0702988 | 1       | 600  | 11 | 0.00669127 |
| 0.0420463 | 1       | 360  | 10 | 0.00879222 |
| 0.0452255 | 1       | 386  | 11 | 0.00135061 |
| 0.0543644 | 1       | 464  | 13 | 0.00674423 |
| 0.0213581 | 1       | 658  | 18 | 0.00788298 |
| 0.0948235 | 1       | 806  | 23 | 0.00484631 |

|           |          |      |    |            |
|-----------|----------|------|----|------------|
| 0.0877647 | 1        | 746  | 21 | 0.00827139 |
| 0.0791765 | 1        | 673  | 15 | 0.00948077 |
| 0.0703529 | 1        | 598  | 17 | 0.00926008 |
| 0.0817647 | 1        | 695  | 15 | 0.00392825 |
| 0.109491  | 1        | 931  | 25 | 0.00763581 |
| 0.0417159 | 1        | 812  | 23 | 0.00655885 |
| 0.0739565 | 1        | 629  | 18 | 0.00620575 |
| 0.0719981 | 1        | 614  | 17 | 0.0094278  |
| 0.0721419 | 1        | 614  | 17 | 0.0094278  |
| 0.0902908 | 1        | 770  | 21 | 0.00674423 |
| 0.102579  | 1        | 875  | 24 | 0.00409597 |
| 0.102941  | 1        | 875  | 24 | 0.00409597 |
| 0.076905  | 1        | 656  | 14 | 0.0076005  |
| 0.0771765 | 1        | 656  | 14 | 0.0076005  |
| 0.0779877 | 1        | 710  | 19 | 0.00666478 |
| 0.0877647 | 1        | 746  | 21 | 0.00588796 |
| 0.0837647 | 1        | 712  | 20 | 0.00799774 |
| 0.0494118 | 1        | 420  | 12 | 0.00772409 |
| 0.0764706 | 1        | 650  | 18 | 0.00799774 |
| 0.0653431 | 1        | 599  | 17 | 0.00937483 |
| 0.0734029 | 1        | 640  | 11 | 0.00463445 |
| 0.0602358 | 1        | 567  | 14 | 0.00604686 |
| 0.104118  | 1        | 885  | 24 | 0.00210095 |
| 0.115294  | 1        | 980  | 21 | 0.00796243 |
| 0.0695294 | 1        | 591  | 17 | 0.00975442 |
| 0.0935294 | 1        | 795  | 22 | 0.00336329 |
| 0.0614118 | 1        | 522  | 15 | 0.00757402 |
| 0.117412  | 1        | 998  | 28 | 0.00692961 |
| 0.0688235 | 1        | 585  | 17 | 0.00726506 |
| 0.041138  | 1        | 642  | 18 | 0.00747692 |
| 0.0689534 | 1        | 591  | 17 | 0.00920711 |
| 0.0987059 | 1        | 839  | 18 | 0.00117406 |
| 0.068     | 1        | 578  | 17 | 0.00859801 |
| 0.0935294 | 1        | 795  | 22 | 0.00293957 |
| 0.0655294 | 1        | 557  | 13 | 0.0068943  |
| 0.131059  | 1        | 1114 | 31 | 0.00662065 |
| 0.0689333 | 0.529623 | 1114 | 31 | 0.00662065 |
| 0.084     | 1        | 714  | 19 | 0.00961318 |
| 0.102471  | 1        | 871  | 20 | 0.00802422 |
| 0.0698824 | 1        | 594  | 17 | 0.00969263 |
| 0.0856471 | 1        | 728  | 19 | 0.00770643 |
| 0.0692941 | 1        | 589  | 17 | 0.00860684 |
| 0.202941  | 1        | 1725 | 43 | 0.00194206 |
| 0.0697647 | 1        | 593  | 17 | 0.00802422 |
| 0.0727465 | 1        | 619  | 14 | 0.00847443 |
| 0.13216   | 1        | 1156 | 32 | 0.00761816 |
| 0.0817647 | 1        | 695  | 15 | 0.00816546 |

|           |   |      |    |            |
|-----------|---|------|----|------------|
| 0.0870588 | 1 | 740  | 17 | 0.00594975 |
| 0.098272  | 1 | 836  | 23 | 0.00728271 |
| 0.0723529 | 1 | 615  | 17 | 0.00982504 |
| 0.108235  | 1 | 920  | 26 | 0.00134178 |
| 0.0924721 | 1 | 796  | 22 | 0.00735333 |
| 0.0710211 | 1 | 610  | 11 | 0.00865981 |
| 0.0686695 | 1 | 592  | 17 | 0.00982504 |
| 0.0709412 | 1 | 603  | 18 | 0.00842146 |
| 0.0888785 | 1 | 764  | 21 | 0.0065412  |
| 0.0898824 | 1 | 764  | 21 | 0.0065412  |
| 0.0797891 | 1 | 681  | 19 | 0.00796243 |
| 0.0817647 | 1 | 695  | 20 | 0.00768878 |
| 0.120235  | 1 | 1022 | 29 | 0.00180964 |
| 0.0684706 | 1 | 582  | 12 | 0.00748574 |
| 0.0889366 | 1 | 828  | 22 | 0.00194206 |
| 0.0723529 | 1 | 615  | 13 | 0.00939249 |
| 0.0931765 | 1 | 792  | 16 | 0.00677954 |
| 0.0863529 | 1 | 734  | 20 | 0.00489045 |
| 0.0962737 | 1 | 819  | 23 | 0.00712381 |
| 0.0717647 | 1 | 610  | 17 | 0.00991331 |
| 0.0861827 | 1 | 736  | 15 | 0.00820077 |
| 0.0658824 | 1 | 560  | 16 | 0.00925125 |
| 0.0512375 | 1 | 884  | 23 | 0.00725623 |
| 0.0507135 | 1 | 757  | 21 | 0.00834201 |
| 0.0696471 | 1 | 592  | 16 | 0.00714147 |
| 0.0791765 | 1 | 673  | 18 | 0.0076005  |
| 0.0389395 | 1 | 586  | 17 | 0.00880987 |
| 0.076     | 1 | 646  | 18 | 0.00820077 |
| 0.0687818 | 1 | 594  | 17 | 0.00905704 |
| 0.109063  | 1 | 929  | 27 | 0.00204799 |
| 0.0729069 | 1 | 620  | 13 | 0.00950725 |
| 0.0601626 | 1 | 518  | 12 | 0.00589679 |
| 0.0736471 | 1 | 626  | 18 | 0.00701788 |
| 0.0895957 | 1 | 769  | 22 | 0.0072474  |
| 0.069464  | 1 | 591  | 16 | 0.00959552 |
| 0.0974406 | 1 | 849  | 24 | 0.00802422 |
| 0.0732874 | 1 | 628  | 16 | 0.00677954 |
| 0.0724706 | 1 | 616  | 18 | 0.00929539 |
| 0.0684487 | 1 | 612  | 17 | 0.00825374 |
| 0.0778823 | 1 | 662  | 19 | 0.00873042 |
| 0.0778823 | 1 | 662  | 19 | 0.00873042 |
| 0.0706062 | 1 | 601  | 14 | 0.0093307  |
| 0.0298236 | 1 | 377  | 11 | 0.00887167 |
| 0.0703961 | 1 | 599  | 17 | 0.00712381 |
| 0.0774975 | 1 | 685  | 17 | 0.00437845 |
| 0.119765  | 1 | 1018 | 20 | 0.00338094 |
| 0.0713029 | 1 | 608  | 16 | 0.0095249  |

|           |          |      |    |            |
|-----------|----------|------|----|------------|
| 0.0667059 | 1        | 567  | 13 | 0.00998393 |
| 0.0497647 | 0.746032 | 567  | 13 | 0.00998393 |
| 0.0997647 | 1        | 848  | 24 | 0.00752988 |
| 0.0642481 | 1        | 549  | 16 | 0.00700023 |
| 0.0643234 | 1        | 549  | 16 | 0.00700023 |
| 0.036715  | 1        | 739  | 21 | 0.00726506 |
| 0.0629093 | 1        | 538  | 16 | 0.00791829 |
| 0.07      | 1        | 595  | 17 | 0.0085627  |
| 0.188588  | 1        | 1603 | 41 | 0.00148303 |
| 0.0702023 | 1        | 597  | 15 | 0.00839498 |
| 0.0709483 | 1        | 612  | 18 | 0.00995745 |
| 0.0302435 | 1        | 585  | 17 | 0.00629403 |
| 0.0591268 | 1        | 757  | 16 | 0.0068943  |
| 0.0856529 | 1        | 757  | 16 | 0.0068943  |
| 0.0489199 | 1        | 616  | 17 | 0.00975442 |
| 0.051285  | 1        | 453  | 13 | 0.0068943  |
| 0.0684531 | 1        | 585  | 16 | 0.00888932 |
| 0.101529  | 1        | 863  | 24 | 0.00194206 |
| 0.111882  | 1        | 951  | 23 | 0.00781236 |
| 0.160118  | 1        | 1361 | 32 | 0.0036546  |
| 0.0869412 | 1        | 739  | 16 | 0.0077594  |
| 0.0741905 | 1        | 637  | 18 | 0.00476687 |
| 0.0378956 | 1        | 613  | 17 | 0.00991331 |
| 0.0763529 | 1        | 649  | 15 | 0.00945428 |
| 0.0315671 | 1        | 644  | 15 | 0.00409597 |
| 0.0684654 | 1        | 609  | 15 | 0.0080154  |
| 0.0659376 | 1        | 615  | 16 | 0.00948959 |
| 0.0713954 | 1        | 615  | 16 | 0.00948959 |
| 0.0578824 | 1        | 492  | 14 | 0.00746809 |
| 0.123882  | 1        | 1053 | 27 | 0.00114758 |
| 0.0802119 | 1        | 863  | 24 | 0.00694727 |
| 0.0319256 | 1        | 508  | 10 | 0.00822726 |
| 0.0730588 | 1        | 621  | 16 | 0.00920711 |
| 0.0697647 | 1        | 593  | 10 | 0.00768878 |
| 0.0410208 | 1        | 823  | 23 | 0.00802422 |
| 0.0646179 | 1        | 553  | 16 | 0.00761816 |
| 0.069175  | 1        | 592  | 15 | 0.00652354 |
| 0.0641861 | 1        | 640  | 17 | 0.00744161 |
| 0.139319  | 1        | 1187 | 26 | 0.00184495 |
| 0.0985882 | 1        | 838  | 24 | 0.00772409 |
| 0.0796471 | 1        | 677  | 19 | 0.00813898 |
| 0.0684708 | 1        | 587  | 11 | 0.00698257 |
| 0.045068  | 1        | 742  | 21 | 0.00347805 |
| 0.0665882 | 1        | 566  | 15 | 0.0079536  |
| 0.0851765 | 1        | 724  | 18 | 0.00743278 |
| 0.0696995 | 1        | 596  | 17 | 0.00966614 |
| 0.0798403 | 1        | 680  | 19 | 0.00762698 |



|           |           |      |    |            |
|-----------|-----------|------|----|------------|
| 0.0578824 | 1         | 492  | 14 | 0.00728271 |
| 0.112235  | 1         | 954  | 25 | 0.00188026 |
| 0.0761176 | 1         | 647  | 19 | 0.00737981 |
| 0.0672783 | 1         | 594  | 17 | 0.00941014 |
| 0.0966268 | 1         | 825  | 18 | 0.00165075 |
| 0.0696471 | 1         | 592  | 17 | 0.00990449 |
| 0.0850588 | 1         | 723  | 20 | 0.00621458 |
| 0.0897647 | 1         | 763  | 21 | 0.00347805 |
| 0.072     | 1         | 612  | 10 | 0.00604686 |
| 0.064755  | 1         | 551  | 11 | 0.00760933 |
| 0.0873152 | 1         | 762  | 21 | 0.00786533 |
| 0.0707118 | 1         | 606  | 16 | 0.00834201 |
| 0.0257405 | 1         | 730  | 19 | 0.00368108 |
| 0.0223907 | 1         | 635  | 18 | 0.0079536  |
| 0.0212271 | 1         | 602  | 17 | 0.00906587 |
| 0.0227433 | 1         | 645  | 18 | 0.0093307  |
| 0.0687543 | 1         | 595  | 15 | 0.00941014 |
| 0.0870588 | 1         | 740  | 20 | 0.00717678 |
| 0.0011566 | 0.0146628 | 682  | 15 | 0.0068943  |
| 0.0791392 | 1         | 673  | 19 | 0.00774174 |
| 0.0696471 | 1         | 592  | 15 | 0.00343391 |
| 0.0696471 | 1         | 592  | 15 | 0.00343391 |
| 0.0861467 | 1         | 740  | 20 | 0.00884518 |
| 0.0763734 | 1         | 652  | 14 | 0.00435197 |
| 0.0787042 | 1         | 673  | 17 | 0.0074063  |
| 0.0850588 | 1         | 723  | 21 | 0.0068943  |
| 0.0645613 | 1         | 599  | 17 | 0.00730036 |
| 0.0716471 | 1         | 609  | 17 | 0.00963083 |
| 0.0634118 | 1         | 539  | 10 | 0.00934835 |
| 0.076     | 1         | 646  | 15 | 0.00841263 |
| 0.0631678 | 1         | 674  | 17 | 0.00700906 |
| 0.0801177 | 1         | 681  | 19 | 0.00748574 |
| 0.0707736 | 1         | 602  | 15 | 0.0094278  |
| 0.068044  | 1         | 606  | 14 | 0.00983387 |
| 0.167608  | 1         | 1425 | 40 | 0.00194206 |
| 0.0803082 | 1         | 688  | 20 | 0.00815664 |
| 0.0796294 | 1         | 679  | 19 | 0.00668244 |
| 0.0709104 | 1         | 606  | 16 | 0.00690313 |
| 0.0705855 | 1         | 604  | 17 | 0.0070532  |
| 0.0728059 | 1         | 623  | 17 | 0.00634699 |
| 0.0625179 | 1         | 654  | 18 | 0.00772409 |
| 0.031724  | 1         | 525  | 11 | 0.0076976  |
| 0.0675881 | 1         | 577  | 11 | 0.00918946 |
| 0.0868504 | 1         | 747  | 20 | 0.00816546 |
| 0.0878204 | 1         | 747  | 20 | 0.00816546 |
| 0.0935294 | 1         | 795  | 23 | 0.00580851 |
| 0.0724706 | 1         | 616  | 13 | 0.00774174 |

|           |          |      |    |            |
|-----------|----------|------|----|------------|
| 0.0661176 | 1        | 562  | 16 | 0.00634699 |
| 0.0742353 | 1        | 631  | 18 | 0.0072474  |
| 0.103176  | 1        | 877  | 18 | 0.0052259  |
| 0.0583529 | 0.540305 | 918  | 26 | 0.00773291 |
| 0.197059  | 1        | 1675 | 46 | 0.00163309 |
| 0.115529  | 1        | 982  | 26 | 0.00416659 |
| 0.0465409 | 1        | 629  | 16 | 0.00632051 |
| 0.0610917 | 1        | 629  | 16 | 0.00632051 |
| 0.0901878 | 1        | 773  | 21 | 0.00643527 |
| 0.079462  | 1        | 703  | 20 | 0.00664713 |
| 0.0798824 | 1        | 679  | 19 | 0.00714147 |
| 0.0789412 | 0.962697 | 697  | 19 | 0.00831553 |
| 0.0810371 | 1        | 697  | 19 | 0.00831553 |
| 0.072     | 1        | 612  | 18 | 0.00905704 |
| 0.0711545 | 1        | 612  | 18 | 0.00905704 |
| 0.0606845 | 1        | 516  | 15 | 0.00196854 |
| 0.105838  | 1        | 901  | 25 | 0.00497873 |
| 0.213059  | 1        | 1811 | 45 | 0.00534948 |
| 0.0526491 | 1        | 790  | 22 | 0.00730919 |
| 0.0399043 | 0.464557 | 790  | 22 | 0.00730919 |
| 0.0756776 | 1        | 645  | 18 | 0.00634699 |
| 0.110353  | 1        | 938  | 21 | 0.00796243 |
| 0.113529  | 1        | 965  | 20 | 0.0052259  |
| 0.0744382 | 1        | 636  | 16 | 0.00680602 |
| 0.104235  | 1        | 886  | 23 | 0.00636465 |
| 0.072     | 1        | 612  | 17 | 0.00832436 |
| 0.0225933 | 0.527337 | 567  | 13 | 0.00797126 |
| 0.0666667 | 1        | 567  | 13 | 0.00797126 |
| 0.0702063 | 1        | 599  | 17 | 0.00150951 |
| 0.0704706 | 1        | 599  | 17 | 0.00150951 |
| 0.101241  | 1        | 873  | 23 | 0.00421956 |
| 0.0688855 | 1        | 594  | 10 | 0.009622   |
| 0.0578942 | 1        | 612  | 17 | 0.00790946 |
| 0.0471066 | 1        | 591  | 17 | 0.00956904 |
| 0.0379968 | 1        | 632  | 18 | 0.00825374 |
| 0.0848036 | 1        | 721  | 20 | 0.0077594  |
| 0.0772012 | 1        | 662  | 16 | 0.0093307  |
| 0.0697647 | 1        | 593  | 17 | 0.00945428 |
| 0.0575294 | 1        | 489  | 11 | 0.00870394 |
| 0.0530588 | 1        | 451  | 13 | 0.00780354 |
| 0.0633707 | 1        | 605  | 11 | 0.00772409 |
| 0.0627178 | 1        | 594  | 13 | 0.00956021 |
| 0.140706  | 1        | 1196 | 32 | 0.00148303 |
| 0.0708754 | 1        | 604  | 17 | 0.00971028 |
| 0.0896171 | 1        | 763  | 19 | 0.00624989 |
| 0.0734775 | 1        | 625  | 18 | 0.00680602 |
| 0.0721176 | 1        | 613  | 17 | 0.00904822 |

|           |          |      |    |            |
|-----------|----------|------|----|------------|
| 0.0685882 | 1        | 583  | 16 | 0.00596741 |
| 0.0731765 | 1        | 622  | 16 | 0.0068943  |
| 0.068844  | 1        | 586  | 12 | 0.00888932 |
| 0.0464183 | 1        | 775  | 22 | 0.00624106 |
| 0.0697456 | 1        | 595  | 14 | 0.00931304 |
| 0.0621995 | 1        | 595  | 14 | 0.00931304 |
| 0.0312318 | 1        | 482  | 27 | 0.00956904 |
| 0.0717398 | 1        | 675  | 18 | 0.00684133 |
| 0.0938463 | 1        | 883  | 19 | 0.00707968 |
| 0.0702353 | 1        | 597  | 12 | 0.00677071 |
| 0.0725882 | 1        | 617  | 17 | 0.00936601 |
| 0.0816471 | 1        | 694  | 19 | 0.00905704 |
| 0.0387734 | 1        | 330  | 10 | 0.00540245 |
| 0.0415534 | 1        | 596  | 17 | 0.00945428 |
| 0.0691765 | 1        | 588  | 16 | 0.00867746 |
| 0.072     | 1        | 612  | 17 | 0.00905704 |
| 0.0813571 | 1        | 693  | 20 | 0.00669127 |
| 0.080939  | 1        | 693  | 20 | 0.00669127 |
| 0.10813   | 1        | 939  | 26 | 0.00514645 |
| 0.0798824 | 1        | 679  | 19 | 0.00643527 |
| 0.0683457 | 0.907216 | 679  | 19 | 0.00643527 |
| 0.112588  | 1        | 957  | 27 | 0.00145654 |
| 0.105968  | 1        | 902  | 18 | 0.00308963 |
| 0.0634118 | 1        | 539  | 15 | 0.00880104 |
| 0.110092  | 1        | 936  | 23 | 0.00534065 |
| 0.110118  | 1        | 936  | 23 | 0.00534065 |
| 0.135145  | 1        | 1149 | 27 | 0.00639113 |
| 0.0291765 | 0.21584  | 1149 | 27 | 0.00639113 |
| 0.0988399 | 1        | 1065 | 27 | 0.00128882 |
| 0.149502  | 1        | 1321 | 33 | 0.00176551 |
| 0.0695652 | 1        | 600  | 12 | 0.00860684 |
| 0.0911765 | 1        | 775  | 20 | 0.00604686 |
| 0.0675056 | 1        | 574  | 16 | 0.00979856 |
| 0.0710332 | 1        | 616  | 17 | 0.00951608 |
| 0.10246   | 1        | 883  | 25 | 0.00523472 |
| 0.101765  | 1        | 865  | 25 | 0.00803305 |
| 0.0430934 | 1        | 594  | 17 | 0.00702671 |
| 0.0438189 | 1        | 604  | 17 | 0.00722092 |
| 0.0924706 | 1        | 786  | 22 | 0.0068943  |
| 0.122171  | 1        | 1042 | 22 | 0.00613513 |
| 0.029121  | 1        | 598  | 16 | 0.00939249 |
| 0.0290723 | 1        | 597  | 12 | 0.00948077 |
| 0.094     | 1        | 799  | 22 | 0.00694727 |
| 0.0779106 | 1        | 704  | 19 | 0.00772409 |
| 0.0754118 | 1        | 641  | 15 | 0.00737981 |
| 0.0750849 | 1        | 641  | 15 | 0.00737981 |
| 0.038579  | 1        | 644  | 15 | 0.00672658 |

|           |          |      |    |            |
|-----------|----------|------|----|------------|
| 0.0757647 | 1        | 644  | 15 | 0.00672658 |
| 0.0361828 | 1        | 604  | 17 | 0.00771526 |
| 0.0710588 | 1        | 604  | 17 | 0.00771526 |
| 0.0652941 | 1        | 555  | 11 | 0.00648823 |
| 0.0881176 | 0.893795 | 838  | 24 | 0.00459031 |
| 0.116824  | 1        | 993  | 26 | 0.00786533 |
| 0.0131118 | 1        | 509  | 13 | 0.00803305 |
| 0.0150953 | 1        | 586  | 16 | 0.00640879 |
| 0.0158681 | 1        | 616  | 18 | 0.00936601 |
| 0.0193457 | 1        | 751  | 21 | 0.00534065 |
| 0.0153787 | 1        | 597  | 13 | 0.00884518 |
| 0.0153272 | 1        | 595  | 16 | 0.00588796 |
| 0.0646528 | 1        | 595  | 16 | 0.00588796 |
| 0.068287  | 1        | 590  | 15 | 0.0099398  |
| 0.0713293 | 1        | 616  | 14 | 0.00588796 |
| 0.092     | 1        | 782  | 21 | 0.00904822 |
| 0.0680098 | 1        | 611  | 17 | 0.00798008 |
| 0.0844773 | 1        | 720  | 20 | 0.00728271 |
| 0.0877625 | 1        | 748  | 21 | 0.00777705 |
| 0.121308  | 1        | 1035 | 29 | 0.00180964 |
| 0.0698824 | 1        | 594  | 17 | 0.00465211 |
| 0.0687131 | 1        | 629  | 18 | 0.00406949 |
| 0.0657636 | 0.986885 | 610  | 12 | 0.00664713 |
| 0.02165   | 1        | 597  | 17 | 0.00936601 |
| 0.0752626 | 1        | 652  | 18 | 0.00615279 |
| 0.076463  | 1        | 652  | 18 | 0.00615279 |
| 0.164839  | 1        | 1428 | 37 | 0.00168606 |
| 0.0675816 | 1        | 586  | 15 | 0.00776822 |
| 0.0601272 | 1        | 586  | 15 | 0.00776822 |
| 0.0338451 | 1        | 604  | 17 | 0.00733567 |
| 0.0892941 | 1        | 759  | 17 | 0.00559665 |
| 0.0794188 | 1        | 727  | 21 | 0.00819195 |
| 0.0775324 | 1        | 695  | 15 | 0.00551721 |
| 0.055801  | 1        | 480  | 11 | 0.00728271 |
| 0.076     | 1        | 646  | 18 | 0.00733567 |
| 0.0856471 | 1        | 728  | 20 | 0.00544658 |
| 0.106118  | 1        | 902  | 24 | 0.00794477 |
| 0.0477647 | 1        | 406  | 12 | 0.00590562 |
| 0.105765  | 1        | 899  | 25 | 0.00653237 |
| 0.160588  | 1        | 1365 | 36 | 0.00165075 |
| 0.110118  | 1        | 936  | 26 | 0.00188909 |
| 0.0857647 | 1        | 729  | 21 | 0.00609982 |
| 0.0955347 | 1        | 997  | 26 | 0.0019244  |
| 0.194327  | 1        | 2028 | 56 | 0.00787415 |
| 0.099655  | 0.995215 | 1045 | 25 | 0.00137709 |
| 0.242118  | 1        | 2058 | 48 | 0.0015713  |
| 0.0520002 | 1        | 945  | 26 | 0.00176551 |

|           |          |      |    |            |
|-----------|----------|------|----|------------|
| 0.072591  | 1        | 620  | 17 | 0.00850974 |
| 0.116153  | 1        | 988  | 27 | 0.00664713 |
| 0.106631  | 1        | 907  | 24 | 0.00707968 |
| 0.0708235 | 1        | 602  | 17 | 0.00786533 |
| 0.200235  | 1        | 1702 | 41 | 0.00713264 |
| 0.0411448 | 1        | 634  | 17 | 0.00941014 |
| 0.109059  | 1        | 927  | 25 | 0.00543776 |
| 0.0864371 | 1        | 738  | 21 | 0.00931304 |
| 0.0852601 | 1        | 767  | 20 | 0.00694727 |
| 0.0411147 | 1        | 599  | 17 | 0.00873925 |
| 0.0704706 | 1        | 599  | 17 | 0.00873925 |
| 0.129041  | 1        | 1880 | 52 | 0.00674423 |
| 0.0818824 | 0.370213 | 1880 | 52 | 0.00674423 |
| 0.0796211 | 1        | 1160 | 33 | 0.00144771 |
| 0.0936365 | 1        | 980  | 26 | 0.00161544 |
| 0.0964074 | 1        | 1009 | 28 | 0.00721209 |
| 0.07854   | 1        | 822  | 23 | 0.00604686 |
| 0.128353  | 1        | 1091 | 30 | 0.00156247 |
| 0.0752971 | 1        | 659  | 18 | 0.00910118 |
| 0.0726691 | 1        | 636  | 13 | 0.00802422 |
| 0.0505029 | 0.70015  | 667  | 19 | 0.00802422 |
| 0.0715908 | 0.983655 | 673  | 19 | 0.00547307 |
| 0.0708788 | 1        | 617  | 16 | 0.00816546 |
| 0.0922353 | 1        | 784  | 21 | 0.00649706 |
| 0.139914  | 1        | 1209 | 32 | 0.00707968 |
| 0.120997  | 1        | 1209 | 32 | 0.00707968 |
| 0.07      | 1        | 595  | 13 | 0.00651472 |
| 0.0718824 | 1        | 611  | 17 | 0.00969263 |
| 0.124531  | 1        | 1063 | 28 | 0.00810367 |
| 0.125059  | 1        | 1063 | 28 | 0.00810367 |
| 0.0757647 | 1        | 644  | 15 | 0.00780354 |
| 0.0684642 | 1        | 584  | 15 | 0.00737099 |
| 0.0589601 | 1        | 584  | 15 | 0.00737099 |
| 0.053848  | 1        | 459  | 13 | 0.00757402 |
| 0.0783109 | 1        | 790  | 19 | 0.00620575 |
| 0.0764869 | 1        | 661  | 18 | 0.00338094 |
| 0.0547957 | 1        | 617  | 17 | 0.00955139 |
| 0.0796687 | 1        | 683  | 16 | 0.00768878 |
| 0.0102186 | 0.182979 | 705  | 20 | 0.00564962 |
| 0.0784706 | 1        | 667  | 17 | 0.00813898 |
| 0.0796471 | 1        | 677  | 17 | 0.00641761 |
| 0.0689412 | 1        | 586  | 17 | 0.00913649 |
| 0.0386221 | 1        | 592  | 13 | 0.00802422 |
| 0.0696471 | 1        | 592  | 12 | 0.0089776  |
| 0.0965729 | 1        | 851  | 21 | 0.00745043 |
| 0.100588  | 1        | 855  | 17 | 0.0083067  |
| 0.0764706 | 1        | 650  | 17 | 0.00816546 |

|           |         |      |    |            |
|-----------|---------|------|----|------------|
| 0.0836471 | 1       | 711  | 20 | 0.00721209 |
| 0.0695294 | 1       | 591  | 17 | 0.00486397 |
| 0.063765  | 1       | 586  | 16 | 0.00905704 |
| 0.072     | 1       | 612  | 17 | 0.00879222 |
| 0.108675  | 1       | 927  | 26 | 0.00169488 |
| 0.133411  | 1       | 1138 | 32 | 0.00744161 |
| 0.133529  | 1       | 1139 | 32 | 0.0049081  |
| 0.105904  | 1       | 904  | 25 | 0.00797126 |
| 0.0691765 | 1       | 588  | 14 | 0.00732685 |
| 0.0755294 | 1       | 642  | 18 | 0.00559665 |
| 0.0803717 | 1       | 692  | 15 | 0.00609982 |
| 0.0800712 | 1       | 720  | 20 | 0.00737981 |
| 0.0730464 | 1       | 774  | 21 | 0.00508466 |
| 0.0766327 | 1       | 812  | 22 | 0.00557017 |
| 0.055587  | 1       | 589  | 16 | 0.00261295 |
| 0.0893632 | 1       | 762  | 21 | 0.00772409 |
| 0.0698193 | 1       | 595  | 14 | 0.00842146 |
| 0.0727059 | 1       | 618  | 14 | 0.00812133 |
| 0.0757877 | 1       | 647  | 19 | 0.00755636 |
| 0.0721445 | 1       | 619  | 11 | 0.00695609 |
| 0.105647  | 1       | 898  | 24 | 0.00730919 |
| 0.0820372 | 1       | 749  | 19 | 0.00120054 |
| 0.0876126 | 1       | 749  | 19 | 0.00120054 |
| 0.0738192 | 1       | 633  | 18 | 0.00816546 |
| 0.108318  | 1       | 922  | 25 | 0.00681485 |
| 0.0705457 | 1       | 605  | 17 | 0.00589679 |
| 0.0727059 | 1       | 618  | 17 | 0.00948959 |
| 0.0901176 | 1       | 766  | 22 | 0.00672658 |
| 0.0818235 | 1       | 700  | 20 | 0.00632051 |
| 0.0739918 | 1       | 633  | 18 | 0.00402535 |
| 0.0402353 | 1       | 342  | 10 | 0.00934835 |
| 0.0701981 | 1       | 599  | 17 | 0.00924242 |
| 0.0769767 | 1       | 662  | 19 | 0.00744161 |
| 0.0743529 | 1       | 632  | 14 | 0.0083685  |
| 0.0704706 | 1       | 599  | 16 | 0.0070532  |
| 0.0637647 | 1       | 542  | 14 | 0.00688547 |
| 0.119875  | 1       | 1032 | 26 | 0.00553486 |
| 0.0687992 | 1       | 585  | 11 | 0.00889815 |
| 0.0676357 | 1       | 698  | 20 | 0.00619692 |
| 0.0700622 | 1       | 597  | 17 | 0.00301902 |
| 0.0704706 | 1       | 599  | 17 | 0.00895111 |
| 0.0709503 | 1       | 604  | 13 | 0.00752105 |
| 0.0799813 | 1       | 684  | 19 | 0.00697375 |
| 0.120706  | 1       | 1026 | 29 | 0.00555251 |
| 0.0844706 | 1       | 718  | 18 | 0.00624106 |
| 0.0697647 | 1       | 593  | 17 | 0.00722092 |
| 0.0744706 | 0.99061 | 639  | 18 | 0.00731802 |

|           |          |      |    |            |
|-----------|----------|------|----|------------|
| 0.0516439 | 1        | 666  | 19 | 0.00427252 |
| 0.0699637 | 1        | 597  | 16 | 0.00852739 |
| 0.0893004 | 1        | 762  | 21 | 0.00409597 |
| 0.118471  | 1        | 1007 | 25 | 0.00758285 |
| 0.0721092 | 1        | 613  | 14 | 0.00948959 |
| 0.132909  | 1        | 1149 | 28 | 0.00134178 |
| 0.103759  | 1        | 897  | 25 | 0.00140358 |
| 0.0694804 | 1        | 591  | 17 | 0.00775057 |
| 0.0615294 | 1        | 523  | 14 | 0.00788298 |
| 0.123765  | 1        | 1052 | 23 | 0.00194206 |
| 0.0955294 | 1        | 812  | 23 | 0.00173902 |
| 0.0720583 | 1        | 613  | 17 | 0.00832436 |
| 0.181231  | 1        | 1543 | 42 | 0.00786533 |
| 0.0624761 | 1        | 654  | 18 | 0.00829788 |
| 0.072     | 1        | 612  | 17 | 0.00956904 |
| 0.0751174 | 1        | 640  | 16 | 0.00939249 |
| 0.0685042 | 1        | 594  | 17 | 0.00660299 |
| 0.0874854 | 1        | 748  | 16 | 0.00601155 |
| 0.0748538 | 1        | 640  | 17 | 0.0095249  |
| 0.0729412 | 1        | 620  | 10 | 0.00888049 |
| 0.0715294 | 1        | 608  | 16 | 0.00978973 |
| 0.0709412 | 1        | 603  | 13 | 0.00392825 |
| 0.0710588 | 1        | 604  | 17 | 0.00976324 |
| 0.0616575 | 1        | 526  | 15 | 0.00865981 |
| 0.109401  | 1        | 931  | 26 | 0.00633817 |
| 0.0702353 | 1        | 597  | 17 | 0.00576437 |
| 0.0362544 | 1        | 537  | 11 | 0.00949842 |
| 0.0843232 | 1        | 717  | 20 | 0.0078565  |
| 0.0680885 | 1        | 597  | 17 | 0.0083685  |
| 0.0743613 | 1        | 652  | 17 | 0.00869511 |
| 0.0790588 | 0.567089 | 1185 | 28 | 0.00368108 |
| 0.126     | 1        | 1071 | 30 | 0.00744161 |
| 0.0489412 | 1        | 416  | 12 | 0.00959552 |
| 0.0718695 | 1        | 617  | 17 | 0.00972794 |
| 0.0721176 | 1        | 613  | 18 | 0.00991331 |
| 0.0877378 | 1        | 747  | 19 | 0.0093307  |
| 0.0623608 | 1        | 532  | 15 | 0.00686782 |
| 0.0699753 | 1        | 595  | 17 | 0.0083685  |
| 0.0637725 | 1        | 545  | 16 | 0.00790946 |
| 0.0922302 | 1        | 787  | 22 | 0.00678837 |
| 0.0793521 | 1        | 681  | 18 | 0.00534065 |
| 0.147677  | 1        | 1265 | 35 | 0.00200385 |
| 0.0663668 | 1        | 605  | 17 | 0.0094278  |
| 0.129529  | 1        | 1101 | 29 | 0.00551721 |
| 0.0561755 | 1        | 594  | 17 | 0.00762698 |
| 0.10677   | 1        | 910  | 24 | 0.00129765 |
| 0.0695294 | 1        | 591  | 17 | 0.00991331 |

|           |          |      |    |            |
|-----------|----------|------|----|------------|
| 0.078885  | 1        | 699  | 20 | 0.00368991 |
| 0.0803725 | 1        | 699  | 20 | 0.00368991 |
| 0.137348  | 1        | 1186 | 29 | 0.00159778 |
| 0.0706427 | 1        | 610  | 17 | 0.00594093 |
| 0.0545621 | 1        | 595  | 10 | 0.00629403 |
| 0.0766518 | 1        | 652  | 19 | 0.00476687 |
| 0.129537  | 1        | 1110 | 28 | 0.00660299 |
| 0.0835294 | 1        | 710  | 20 | 0.00841263 |
| 0.0870676 | 1        | 750  | 20 | 0.00843029 |
| 0.0769953 | 1        | 656  | 14 | 0.00209212 |
| 0.137559  | 1        | 1172 | 32 | 0.00669127 |
| 0.102481  | 1        | 884  | 20 | 0.0076005  |
| 0.0914741 | 1        | 780  | 16 | 0.0062852  |
| 0.103412  | 1        | 879  | 25 | 0.00747692 |
| 0.0745954 | 1        | 636  | 18 | 0.00966614 |
| 0.0677716 | 1        | 597  | 11 | 0.00896877 |
| 0.078     | 1        | 663  | 14 | 0.00196854 |
| 0.119412  | 1        | 1015 | 27 | 0.0042637  |
| 0.0592157 | 1        | 675  | 19 | 0.00841263 |
| 0.0764374 | 1        | 1017 | 29 | 0.00755636 |
| 0.0848036 | 1        | 721  | 18 | 0.00674423 |
| 0.0848235 | 1        | 721  | 18 | 0.00674423 |
| 0.0436592 | 1        | 965  | 27 | 0.00743278 |
| 0.0533114 | 0.780069 | 582  | 12 | 0.00925125 |
| 0.122588  | 1        | 1042 | 27 | 0.00189792 |
| 0.0512074 | 1        | 528  | 15 | 0.00631168 |
| 0.0744836 | 1        | 768  | 20 | 0.00765347 |
| 0.121576  | 1        | 1034 | 27 | 0.00796243 |
| 0.082468  | 1        | 818  | 22 | 0.00796243 |
| 0.0875294 | 1        | 744  | 18 | 0.00634699 |
| 0.0623825 | 1        | 531  | 11 | 0.00864215 |
| 0.0814347 | 1        | 697  | 16 | 0.0076976  |
| 0.0704706 | 1        | 599  | 17 | 0.00930421 |
| 0.0905776 | 1        | 770  | 20 | 0.00670892 |
| 0.086931  | 1        | 739  | 21 | 0.00200385 |
| 0.0944706 | 1        | 803  | 23 | 0.00623224 |
| 0.0721674 | 1        | 614  | 17 | 0.00786533 |
| 0.0776471 | 1        | 660  | 14 | 0.00722974 |
| 0.0930889 | 1        | 792  | 22 | 0.00564962 |
| 0.101817  | 1        | 874  | 21 | 0.00634699 |
| 0.0725882 | 1        | 617  | 18 | 0.00634699 |
| 0.044313  | 1        | 674  | 19 | 0.00737981 |
| 0.0644924 | 1        | 613  | 15 | 0.009878   |
| 0.0771793 | 1        | 672  | 19 | 0.00617044 |
| 0.0695193 | 1        | 593  | 15 | 0.0092689  |
| 0.0804598 | 1        | 686  | 16 | 0.00841263 |
| 0.0690588 | 1        | 587  | 11 | 0.0076005  |



|           |          |      |    |            |
|-----------|----------|------|----|------------|
| 0.0863326 | 1        | 734  | 21 | 0.0068943  |
| 0.11365   | 1        | 970  | 27 | 0.00829788 |
| 0.0789226 | 1        | 671  | 19 | 0.00763581 |
| 0.0703529 | 1        | 598  | 10 | 0.00436963 |
| 0.0687059 | 1        | 584  | 16 | 0.0093307  |
| 0.0831376 | 1        | 708  | 20 | 0.00728271 |
| 0.137529  | 1        | 1169 | 33 | 0.00210095 |
| 0.0195526 | 1        | 423  | 11 | 0.0030455  |
| 0.0807796 | 1        | 688  | 17 | 0.0042637  |
| 0.0711523 | 1        | 607  | 17 | 0.00945428 |
| 0.0396887 | 1        | 617  | 18 | 0.00914532 |
| 0.0715115 | 1        | 616  | 17 | 0.00918063 |
| 0.0549412 | 1        | 467  | 13 | 0.00914532 |
| 0.120118  | 1        | 1021 | 26 | 0.00780354 |
| 0.0823681 | 1        | 704  | 17 | 0.00937483 |
| 0.0463611 | 1        | 616  | 16 | 0.00551721 |
| 0.102101  | 1        | 870  | 20 | 0.00843029 |
| 0.222509  | 1        | 1896 | 51 | 0.00819195 |
| 0.0386444 | 1        | 634  | 14 | 0.00717678 |
| 0.0723529 | 1        | 615  | 16 | 0.00972794 |
| 0.0722353 | 1        | 614  | 17 | 0.00937483 |
| 0.0724706 | 1        | 616  | 18 | 0.00865098 |
| 0.0724706 | 1        | 616  | 15 | 0.00914532 |
| 0.0974148 | 1        | 829  | 21 | 0.0061881  |
| 0.128633  | 1        | 1102 | 31 | 0.00763581 |
| 0.0315615 | 1        | 532  | 15 | 0.00648823 |
| 0.0353583 | 0.990033 | 602  | 13 | 0.00722092 |
| 0.0752625 | 1        | 645  | 17 | 0.00438728 |
| 0.0556853 | 1        | 620  | 14 | 0.00994862 |
| 0.0805448 | 1        | 686  | 19 | 0.00735333 |
| 0.117586  | 1        | 1023 | 28 | 0.00776822 |
| 0.0292593 | 1        | 604  | 17 | 0.009622   |
| 0.0297922 | 1        | 615  | 14 | 0.00861567 |
| 0.0756471 | 0.986196 | 652  | 15 | 0.00797126 |
| 0.067512  | 1        | 575  | 16 | 0.0096838  |
| 0.0668994 | 1        | 575  | 16 | 0.0096838  |
| 0.0990588 | 1        | 842  | 22 | 0.0018273  |
| 0.0715294 | 1        | 608  | 17 | 0.0090747  |
| 0.0921176 | 1        | 783  | 21 | 0.00670892 |
| 0.0782353 | 1        | 665  | 17 | 0.00764464 |
| 0.0716471 | 1        | 609  | 17 | 0.0089158  |
| 0.0658794 | 1        | 569  | 16 | 0.0068943  |
| 0.0891513 | 1        | 770  | 18 | 0.0078565  |
| 0.0377748 | 1        | 586  | 16 | 0.0054819  |
| 0.0646147 | 1        | 550  | 10 | 0.00935718 |
| 0.0851765 | 1        | 724  | 21 | 0.00802422 |
| 0.0697729 | 1        | 599  | 17 | 0.00765347 |

|            |          |      |    |            |
|------------|----------|------|----|------------|
| 0.0711765  | 1        | 605  | 17 | 0.00852739 |
| 0.0710453  | 1        | 609  | 17 | 0.00617927 |
| 0.059138   | 1        | 708  | 20 | 0.00485514 |
| 0.0815325  | 1        | 698  | 15 | 0.00676189 |
| 0.0699906  | 1        | 598  | 17 | 0.00669127 |
| 0.0666142  | 1        | 592  | 17 | 0.00746809 |
| 0.0654622  | 1        | 558  | 10 | 0.00905704 |
| 0.0328373  | 1        | 609  | 17 | 0.00728271 |
| 0.0493355  | 1        | 709  | 16 | 0.00747692 |
| 0.0834118  | 1        | 709  | 16 | 0.00747692 |
| 0.0704706  | 1        | 599  | 14 | 0.00633817 |
| 0.133487   | 1        | 1158 | 33 | 0.00435197 |
| 0.0644149  | 1        | 595  | 17 | 0.00746809 |
| 0.0946565  | 1        | 806  | 22 | 0.00165075 |
| 0.276453   | 1        | 2354 | 62 | 0.00135061 |
| 0.0806679  | 1        | 686  | 19 | 0.00620575 |
| 0.0669942  | 1        | 600  | 15 | 0.00957787 |
| 0.0491542  | 1        | 616  | 17 | 0.00714147 |
| 0.0695979  | 1        | 592  | 17 | 0.00865981 |
| 0.0738824  | 1        | 628  | 11 | 0.00402535 |
| 0.0702353  | 1        | 597  | 11 | 0.00853622 |
| 0.0729412  | 1        | 620  | 14 | 0.00805071 |
| 0.197882   | 1        | 1682 | 45 | 0.00194206 |
| 0.00448581 | 0.058997 | 678  | 19 | 0.00623224 |
| 0.0824706  | 1        | 701  | 20 | 0.00825374 |
| 0.100971   | 1        | 863  | 24 | 0.00718561 |
| 0.0809412  | 1        | 688  | 17 | 0.00718561 |
| 0.104706   | 1        | 890  | 25 | 0.00499638 |
| 0.0903862  | 1        | 770  | 21 | 0.00200385 |
| 0.0826388  | 1        | 704  | 19 | 0.00551721 |
| 0.076      | 1        | 646  | 14 | 0.00666478 |
| 0.0661176  | 1        | 562  | 16 | 0.00748574 |
| 0.0708235  | 1        | 602  | 17 | 0.009622   |
| 0.0813357  | 1        | 967  | 27 | 0.00553486 |
| 0.0407738  | 1        | 685  | 19 | 0.00816546 |
| 0.123176   | 1        | 1047 | 23 | 0.00156247 |
| 0.0845882  | 1        | 719  | 21 | 0.00261295 |
| 0.0957647  | 1        | 814  | 23 | 0.00241874 |
| 0.0661176  | 1        | 562  | 15 | 0.00481983 |
| 0.0705993  | 1        | 602  | 17 | 0.00843029 |
| 0.130042   | 1        | 1109 | 30 | 0.00162426 |
| 0.07106    | 1        | 606  | 15 | 0.00757402 |
| 0.0691765  | 1        | 588  | 17 | 0.00796243 |
| 0.0924193  | 0.6942   | 1138 | 31 | 0.00434314 |
| 0.0877647  | 1        | 746  | 21 | 0.00813898 |
| 0.0690896  | 1        | 595  | 15 | 0.00535831 |
| 0.0712617  | 1        | 610  | 16 | 0.0090747  |

|            |            |      |    |            |
|------------|------------|------|----|------------|
| 0.0661176  | 1          | 562  | 16 | 0.0075034  |
| 0.0779251  | 1          | 670  | 18 | 0.00588796 |
| 0.0142363  | 1          | 605  | 14 | 0.00771526 |
| 0.0140716  | 1          | 598  | 17 | 0.00977207 |
| 0.0756833  | 1          | 648  | 19 | 0.00880987 |
| 0.0113237  | 0.202429   | 494  | 14 | 0.00768878 |
| 0.0719323  | 1          | 612  | 17 | 0.00877456 |
| 0.0710967  | 1          | 612  | 17 | 0.00877456 |
| 0.0695143  | 1          | 594  | 15 | 0.0051641  |
| 0.0728235  | 1          | 619  | 15 | 0.00873042 |
| 0.0448235  | 1          | 381  | 11 | 0.00885401 |
| 0.0545438  | 1          | 605  | 17 | 0.00873925 |
| 0.0707894  | 1          | 625  | 15 | 0.00783002 |
| 0.072489   | 1          | 625  | 15 | 0.00783002 |
| 0.0797372  | 1          | 704  | 19 | 0.00747692 |
| 0.0641176  | 1          | 545  | 12 | 0.00979856 |
| 0.0368337  | 1          | 597  | 17 | 0.00837732 |
| 0.0891765  | 1          | 758  | 21 | 0.00718561 |
| 0.11       | 1          | 935  | 23 | 0.00800657 |
| 0.0432449  | 1          | 830  | 24 | 0.00658534 |
| 0.0716299  | 1          | 610  | 17 | 0.00945428 |
| 0.0954118  | 1          | 811  | 20 | 0.0083685  |
| 0.071479   | 1          | 608  | 17 | 0.00960435 |
| 0.0444868  | 1          | 700  | 17 | 0.00685016 |
| 0.0747674  | 1          | 651  | 18 | 0.0077594  |
| 0.0775021  | 1          | 659  | 18 | 0.00746809 |
| 0.049705   | 1          | 775  | 16 | 0.00879222 |
| 0.0908984  | 1          | 775  | 16 | 0.00879222 |
| 0.0467215  | 1          | 761  | 21 | 0.00524355 |
| 0.042779   | 1          | 649  | 18 | 0.00997511 |
| 0.0836368  | 1          | 712  | 16 | 0.00535831 |
| 0.072      | 1          | 612  | 11 | 0.00889815 |
| 0.0849412  | 1          | 722  | 16 | 0.00604686 |
| 0.00247059 | 0.00952813 | 2204 | 49 | 0.00137709 |
| 0.0722353  | 1          | 614  | 17 | 0.00996628 |
| 0.069438   | 1          | 598  | 16 | 0.0094278  |
| 0.0715409  | 1          | 637  | 12 | 0.00706202 |
| 0.064835   | 1          | 623  | 18 | 0.00649706 |
| 0.114088   | 1          | 975  | 21 | 0.00148303 |
| 0.115968   | 1          | 987  | 23 | 0.00732685 |
| 0.102824   | 0.885512   | 987  | 23 | 0.00732685 |
| 0.0447059  | 1          | 380  | 11 | 0.00905704 |
| 0.0688278  | 1          | 586  | 16 | 0.00839498 |
| 0.0850588  | 1          | 723  | 20 | 0.00624106 |
| 0.0749354  | 1          | 638  | 18 | 0.0080154  |
| 0.101059   | 1          | 859  | 24 | 0.00624106 |
| 0.0678204  | 1          | 580  | 13 | 0.0024364  |

|           |          |      |    |            |
|-----------|----------|------|----|------------|
| 0.0365223 | 1        | 523  | 10 | 0.00293957 |
| 0.0980983 | 1        | 846  | 23 | 0.00129765 |
| 0.0856911 | 1        | 739  | 17 | 0.00744161 |
| 0.0717647 | 1        | 610  | 17 | 0.0096838  |
| 0.0752941 | 1        | 640  | 17 | 0.00604686 |
| 0.070845  | 1        | 607  | 14 | 0.0074063  |
| 0.0829022 | 1        | 705  | 20 | 0.00829788 |
| 0.0705882 | 1        | 600  | 12 | 0.0085627  |
| 0.0711765 | 1        | 605  | 17 | 0.00873925 |
| 0.0628511 | 1        | 537  | 14 | 0.009622   |
| 0.121412  | 1        | 1032 | 28 | 0.00165958 |
| 0.0678221 | 1        | 587  | 11 | 0.00991331 |
| 0.100939  | 0.992027 | 878  | 25 | 0.00629403 |
| 0.0797647 | 1        | 678  | 19 | 0.00719444 |
| 0.0456451 | 1        | 588  | 13 | 0.00957787 |
| 0.0872174 | 1        | 756  | 21 | 0.00781236 |
| 0.0376532 | 1        | 593  | 13 | 0.00437845 |
| 0.0806602 | 1        | 694  | 19 | 0.00792712 |
| 0.0728127 | 1        | 620  | 11 | 0.00726506 |
| 0.0711179 | 1        | 605  | 17 | 0.00758285 |
| 0.064322  | 1        | 620  | 17 | 0.00438728 |
| 0.13313   | 1        | 1134 | 27 | 0.00507583 |
| 0.133005  | 1        | 1134 | 27 | 0.00507583 |
| 0.0696173 | 1        | 593  | 17 | 0.00244522 |
| 0.0670248 | 1        | 574  | 16 | 0.00814781 |
| 0.0606357 | 1        | 620  | 18 | 0.00530534 |
| 0.13474   | 1        | 1335 | 37 | 0.00146537 |
| 0.058819  | 1        | 757  | 19 | 0.00775057 |
| 0.0806602 | 0.986041 | 788  | 22 | 0.00153599 |
| 0.0680185 | 1        | 899  | 25 | 0.00648823 |
| 0.0705471 | 1        | 606  | 16 | 0.00896877 |
| 0.0614453 | 1        | 568  | 15 | 0.00725623 |
| 0.0663784 | 1        | 568  | 15 | 0.00725623 |
| 0.105345  | 1        | 944  | 27 | 0.00641761 |
| 0.0559616 | 1        | 735  | 18 | 0.00742395 |
| 0.0692037 | 1        | 591  | 17 | 0.00668244 |
| 0.241742  | 1        | 2093 | 58 | 0.00143006 |
| 0.128205  | 1        | 1110 | 27 | 0.00653237 |
| 0.0764706 | 1        | 650  | 19 | 0.00546424 |
| 0.072     | 1        | 612  | 15 | 0.00994862 |
| 0.113831  | 1        | 972  | 28 | 0.00129765 |
| 0.269235  | 1        | 2299 | 61 | 0.00172137 |
| 0.0616125 | 1        | 525  | 10 | 0.00524355 |
| 0.0682096 | 1        | 613  | 17 | 0.00882753 |
| 0.0708235 | 1        | 602  | 16 | 0.00720326 |
| 0.0749412 | 1        | 637  | 18 | 0.00780354 |
| 0.0736471 | 1        | 626  | 18 | 0.00757402 |

|           |          |      |    |            |
|-----------|----------|------|----|------------|
| 0.0977065 | 1        | 835  | 19 | 0.00841263 |
| 0.0744208 | 1        | 636  | 16 | 0.00617044 |
| 0.0672941 | 1        | 572  | 11 | 0.009622   |
| 0.0515948 | 1        | 977  | 27 | 0.00666478 |
| 0.069868  | 1        | 598  | 15 | 0.00777705 |
| 0.0751695 | 1        | 643  | 18 | 0.00377818 |
| 0.0970588 | 1        | 825  | 23 | 0.00767112 |
| 0.119882  | 1        | 1019 | 28 | 0.00748574 |
| 0.0695294 | 1        | 591  | 13 | 0.00442259 |
| 0.0818824 | 1        | 696  | 18 | 0.00631168 |
| 0.0765882 | 1        | 651  | 18 | 0.0076976  |
| 0.0874105 | 1        | 745  | 17 | 0.00619692 |
| 0.0391445 | 1        | 593  | 14 | 0.00948959 |
| 0.0729412 | 1        | 620  | 18 | 0.00728271 |
| 0.0745882 | 1        | 634  | 18 | 0.00627637 |
| 0.0457342 | 1        | 825  | 24 | 0.0054819  |
| 0.0536902 | 1        | 702  | 20 | 0.00899525 |
| 0.0630588 | 1        | 536  | 15 | 0.00784767 |
| 0.0765882 | 1        | 651  | 16 | 0.00744161 |
| 0.0881176 | 1        | 749  | 21 | 0.00478452 |
| 0.101412  | 1        | 862  | 22 | 0.0019244  |
| 0.0747059 | 1        | 635  | 18 | 0.00609099 |
| 0.0688235 | 1        | 585  | 17 | 0.0074063  |
| 0.0754118 | 1        | 641  | 16 | 0.0076005  |
| 0.0351409 | 1        | 591  | 17 | 0.00901291 |
| 0.0694232 | 1        | 591  | 17 | 0.00901291 |
| 0.0618472 | 1        | 527  | 11 | 0.00905704 |
| 0.0395744 | 1        | 584  | 16 | 0.00957787 |
| 0.0692325 | 1        | 617  | 18 | 0.00737981 |
| 0.0668761 | 1        | 596  | 17 | 0.00956021 |
| 0.0654992 | 1        | 763  | 18 | 0.00587031 |
| 0.0388157 | 1        | 763  | 18 | 0.00587031 |
| 0.124326  | 1        | 1060 | 28 | 0.00196854 |
| 0.0716631 | 1        | 611  | 14 | 0.00973676 |
| 0.0700599 | 1        | 596  | 17 | 0.00991331 |
| 0.0686073 | 1        | 601  | 17 | 0.00884518 |
| 0.0308515 | 1        | 704  | 17 | 0.00474921 |
| 0.0254612 | 1        | 581  | 15 | 0.00901291 |
| 0.0567294 | 1        | 690  | 18 | 0.00601155 |
| 0.032     | 0.394203 | 690  | 18 | 0.00601155 |
| 0.0704706 | 1        | 599  | 11 | 0.00784767 |
| 0.0855294 | 1        | 727  | 19 | 0.00710616 |
| 0.0788235 | 1        | 670  | 13 | 0.00485514 |
| 0.0392221 | 1        | 714  | 20 | 0.00671775 |
| 0.0717011 | 1        | 714  | 20 | 0.00671775 |
| 0.0418184 | 1        | 643  | 18 | 0.00912766 |
| 0.0755831 | 1        | 755  | 21 | 0.00842146 |

|           |          |      |    |            |
|-----------|----------|------|----|------------|
| 0.0775294 | 1        | 659  | 17 | 0.00816546 |
| 0.0985882 | 1        | 838  | 23 | 0.00674423 |
| 0.0712941 | 1        | 606  | 17 | 0.00648823 |
| 0.0604706 | 0.761481 | 675  | 19 | 0.00787415 |
| 0.0722353 | 1        | 614  | 18 | 0.00729154 |
| 0.0658146 | 1        | 587  | 17 | 0.00985152 |
| 0.122323  | 1        | 1091 | 25 | 0.00730036 |
| 0.0466425 | 1        | 721  | 13 | 0.00402535 |
| 0.0327722 | 1        | 695  | 18 | 0.00388411 |
| 0.0651115 | 1        | 695  | 18 | 0.00388411 |
| 0.106243  | 1        | 907  | 21 | 0.00194206 |
| 0.105871  | 1        | 907  | 21 | 0.00194206 |
| 0.0525366 | 1        | 873  | 24 | 0.00409597 |
| 0.102706  | 1        | 873  | 24 | 0.00409597 |
| 0.127657  | 1        | 1087 | 25 | 0.00124468 |
| 0.0552782 | 1        | 620  | 17 | 0.00937483 |
| 0.109529  | 1        | 931  | 18 | 0.0083685  |
| 0.0947694 | 1        | 857  | 18 | 0.00566727 |
| 0.033114  | 1        | 604  | 17 | 0.00976324 |
| 0.0316886 | 1        | 578  | 16 | 0.00977207 |
| 0.0693302 | 1        | 590  | 17 | 0.00774174 |
| 0.0687867 | 1        | 597  | 12 | 0.00717678 |
| 0.0691567 | 1        | 661  | 13 | 0.00303667 |
| 0.0958631 | 1        | 818  | 22 | 0.0011211  |
| 0.0737647 | 1        | 627  | 16 | 0.00935718 |
| 0.0750147 | 1        | 638  | 18 | 0.0074063  |
| 0.0718824 | 1        | 611  | 15 | 0.00842146 |
| 0.0516937 | 1        | 586  | 14 | 0.00796243 |
| 0.0613265 | 1        | 699  | 20 | 0.00828905 |
| 0.0820134 | 1        | 699  | 20 | 0.00828905 |
| 0.0690141 | 1        | 588  | 17 | 0.00905704 |
| 0.0385574 | 1        | 588  | 17 | 0.00905704 |
| 0.0590613 | 1        | 526  | 13 | 0.0089158  |
| 0.0690546 | 1        | 615  | 16 | 0.00820077 |
| 0.109294  | 1        | 929  | 25 | 0.00771526 |
| 0.0229401 | 1        | 517  | 15 | 0.00847443 |
| 0.103255  | 1        | 882  | 25 | 0.0099398  |
| 0.0930751 | 1        | 793  | 21 | 0.0078565  |
| 0.0881176 | 1        | 749  | 21 | 0.00802422 |
| 0.0703819 | 1        | 610  | 12 | 0.00694727 |
| 0.0696945 | 1        | 600  | 17 | 0.00945428 |
| 0.138118  | 0.995759 | 1179 | 31 | 0.00154482 |
| 0.0690588 | 1        | 587  | 14 | 0.00661182 |
| 0.0531765 | 1        | 452  | 13 | 0.00969263 |
| 0.0954098 | 1        | 979  | 27 | 0.00210095 |
| 0.0703529 | 1        | 598  | 17 | 0.00790064 |
| 0.0808235 | 1        | 687  | 19 | 0.0080154  |

|           |          |      |    |            |
|-----------|----------|------|----|------------|
| 0.103059  | 1        | 876  | 18 | 0.00387528 |
| 0.0603529 | 0.90636  | 566  | 10 | 0.00916297 |
| 0.0835615 | 1        | 763  | 21 | 0.00629403 |
| 0.0565908 | 0.696203 | 711  | 13 | 0.00710616 |
| 0.0515294 | 1        | 438  | 12 | 0.00698257 |
| 0.0711765 | 1        | 605  | 17 | 0.00828022 |
| 0.0406966 | 1        | 680  | 19 | 0.0093307  |
| 0.0457239 | 1        | 764  | 20 | 0.0068943  |
| 0.0709412 | 1        | 603  | 15 | 0.00712381 |
| 0.0882353 | 1        | 750  | 15 | 0.0068943  |
| 0.106118  | 1        | 902  | 20 | 0.00405183 |
| 0.0717625 | 1        | 614  | 16 | 0.00380466 |
| 0.0747059 | 1        | 635  | 18 | 0.00835084 |
| 0.0467719 | 1        | 581  | 15 | 0.00768878 |
| 0.0387592 | 1        | 596  | 15 | 0.00929539 |
| 0.120492  | 1        | 1029 | 29 | 0.00177433 |
| 0.0702353 | 1        | 597  | 17 | 0.00784767 |
| 0.0770967 | 1        | 683  | 19 | 0.00747692 |
| 0.0715294 | 1        | 608  | 17 | 0.00631168 |
| 0.0615294 | 1        | 523  | 15 | 0.00745043 |
| 0.106563  | 1        | 906  | 24 | 0.00813015 |
| 0.0917718 | 1        | 822  | 22 | 0.00703554 |
| 0.110353  | 1        | 938  | 26 | 0.00596741 |
| 0.0811765 | 1        | 690  | 18 | 0.00948077 |
| 0.0811097 | 1        | 690  | 18 | 0.00948077 |
| 0.0852253 | 1        | 732  | 21 | 0.00438728 |
| 0.0767059 | 1        | 652  | 18 | 0.00528769 |
| 0.0954508 | 1        | 812  | 18 | 0.00706202 |
| 0.0696225 | 1        | 592  | 17 | 0.0099398  |
| 0.0716471 | 1        | 609  | 17 | 0.00957787 |
| 0.135838  | 1        | 1175 | 30 | 0.00533183 |
| 0.0694798 | 1        | 601  | 17 | 0.00956021 |
| 0.118975  | 1        | 1133 | 32 | 0.0061881  |
| 0.0444893 | 1        | 639  | 13 | 0.0083685  |
| 0.0948487 | 1        | 812  | 37 | 0.00780354 |
| 0.0732794 | 1        | 625  | 15 | 0.0033368  |
| 0.196235  | 1        | 1668 | 43 | 0.00258647 |
| 0.0820244 | 1        | 799  | 22 | 0.00821843 |
| 0.093026  | 1        | 795  | 22 | 0.00703554 |
| 0.0326557 | 0.524962 | 661  | 19 | 0.00791829 |
| 0.0771565 | 1        | 661  | 19 | 0.00791829 |
| 0.0599473 | 1        | 637  | 18 | 0.00708851 |
| 0.0743551 | 1        | 637  | 18 | 0.00708851 |
| 0.071722  | 1        | 611  | 10 | 0.0076976  |
| 0.070922  | 1        | 610  | 16 | 0.00863332 |
| 0.0823529 | 1        | 700  | 20 | 0.00677071 |
| 0.090163  | 1        | 769  | 22 | 0.00796243 |

|           |   |      |    |            |
|-----------|---|------|----|------------|
| 0.0714118 | 1 | 607  | 15 | 0.00972794 |
| 0.0997647 | 1 | 848  | 24 | 0.00624106 |
| 0.0439865 | 1 | 651  | 19 | 0.00662947 |
| 0.0870588 | 1 | 740  | 21 | 0.00747692 |
| 0.0698824 | 1 | 594  | 14 | 0.00880104 |
| 0.0623529 | 1 | 530  | 15 | 0.00808601 |
| 0.136235  | 1 | 1158 | 26 | 0.00210095 |
| 0.0728235 | 1 | 619  | 17 | 0.0049081  |
| 0.0713614 | 1 | 607  | 17 | 0.00787415 |
| 0.056392  | 1 | 618  | 12 | 0.00520824 |
| 0.0954118 | 1 | 811  | 20 | 0.00381349 |
| 0.076792  | 1 | 811  | 20 | 0.00381349 |
| 0.101647  | 1 | 864  | 24 | 0.00504935 |
| 0.0655877 | 1 | 616  | 15 | 0.00600272 |
| 0.0609412 | 1 | 518  | 15 | 0.00899525 |
| 0.0710606 | 1 | 607  | 14 | 0.00973676 |
| 0.0751626 | 1 | 647  | 18 | 0.00591444 |
| 0.0698188 | 1 | 601  | 14 | 0.00674423 |
| 0.122706  | 1 | 1043 | 29 | 0.00594975 |
| 0.0964706 | 1 | 820  | 23 | 0.00620575 |
| 0.0697183 | 1 | 594  | 11 | 0.0064794  |
| 0.0977647 | 1 | 831  | 23 | 0.00698257 |
| 0.0903529 | 1 | 768  | 21 | 0.00173902 |
| 0.0671407 | 1 | 576  | 16 | 0.00725623 |
| 0.026154  | 1 | 617  | 17 | 0.00975442 |
| 0.0784706 | 1 | 667  | 17 | 0.00842146 |
| 0.122353  | 1 | 1040 | 24 | 0.00813898 |
| 0.0838824 | 1 | 713  | 19 | 0.00796243 |
| 0.0664782 | 1 | 1129 | 28 | 0.00154482 |
| 0.109059  | 1 | 927  | 24 | 0.00608217 |
| 0.0400126 | 1 | 1143 | 32 | 0.00816546 |
| 0.0324862 | 1 | 928  | 23 | 0.00609982 |
| 0.0517398 | 1 | 1478 | 41 | 0.00140358 |
| 0.0702353 | 1 | 597  | 17 | 0.00980738 |
| 0.0762108 | 1 | 1070 | 30 | 0.00190675 |
| 0.0917647 | 1 | 780  | 22 | 0.00544658 |
| 0.0625488 | 1 | 882  | 24 | 0.00194206 |
| 0.0699883 | 1 | 597  | 17 | 0.00951608 |
| 0.0536079 | 1 | 708  | 20 | 0.00551721 |
| 0.0777316 | 1 | 673  | 12 | 0.00460797 |
| 0.0601953 | 1 | 795  | 21 | 0.0054819  |
| 0.0390695 | 1 | 1535 | 42 | 0.00765347 |
| 0.0237217 | 1 | 932  | 26 | 0.005067   |
| 0.0886313 | 1 | 757  | 16 | 0.0042637  |
| 0.0192929 | 1 | 758  | 21 | 0.00551721 |
| 0.0705882 | 1 | 600  | 33 | 0.00997511 |
| 0.043635  | 1 | 593  | 16 | 0.00985152 |



|           |   |      |    |            |
|-----------|---|------|----|------------|
| 0.106202  | 1 | 2166 | 60 | 0.00188909 |
| 0.047167  | 1 | 641  | 16 | 0.00475804 |
| 0.0730588 | 1 | 621  | 18 | 0.00373404 |
| 0.0707059 | 1 | 601  | 14 | 0.00854505 |
| 0.0850588 | 1 | 723  | 18 | 0.00686782 |
| 0.100588  | 1 | 855  | 24 | 0.0069914  |
| 0.0371947 | 1 | 603  | 17 | 0.00719444 |
| 0.0640883 | 1 | 1039 | 28 | 0.00210095 |
| 0.0481742 | 1 | 781  | 21 | 0.00674423 |
| 0.0701176 | 1 | 596  | 16 | 0.00943663 |
| 0.0993223 | 1 | 850  | 23 | 0.00594975 |
| 0.069175  | 1 | 592  | 17 | 0.00913649 |
| 0.0382651 | 1 | 809  | 22 | 0.00199502 |
| 0.0925882 | 1 | 787  | 22 | 0.00480217 |
| 0.110471  | 1 | 939  | 26 | 0.00177433 |
| 0.0721589 | 1 | 614  | 17 | 0.00728271 |
| 0.0712941 | 1 | 606  | 16 | 0.00925125 |
| 0.0772941 | 1 | 657  | 18 | 0.0099398  |
| 0.0757558 | 1 | 644  | 17 | 0.00835967 |
| 0.0732738 | 1 | 1075 | 30 | 0.00135061 |
| 0.0718424 | 1 | 1054 | 24 | 0.00813898 |
| 0.140941  | 1 | 1198 | 34 | 0.00608217 |
| 0.0949412 | 1 | 807  | 19 | 0.00782119 |
| 0.0750588 | 1 | 638  | 18 | 0.00700023 |
| 0.0775549 | 1 | 661  | 19 | 0.00843029 |
| 0.0710427 | 1 | 605  | 17 | 0.00901291 |
| 0.0688935 | 1 | 594  | 17 | 0.00895994 |
| 0.0726973 | 1 | 618  | 16 | 0.00570258 |
| 0.0722469 | 1 | 618  | 16 | 0.00570258 |
| 0.116276  | 1 | 993  | 27 | 0.00763581 |
| 0.0716471 | 1 | 609  | 17 | 0.00607334 |
| 0.0813926 | 1 | 692  | 19 | 0.00632051 |
| 0.0495153 | 1 | 710  | 19 | 0.00210095 |
| 0.0594881 | 1 | 853  | 19 | 0.00167723 |
| 0.0914118 | 1 | 777  | 22 | 0.00824491 |
| 0.0942353 | 1 | 801  | 23 | 0.00496107 |
| 0.0858824 | 1 | 730  | 21 | 0.00765347 |
| 0.0963997 | 1 | 822  | 21 | 0.00624989 |
| 0.0715375 | 1 | 610  | 17 | 0.00844794 |
| 0.109629  | 1 | 937  | 26 | 0.00674423 |
| 0.134588  | 1 | 1144 | 20 | 0.00813015 |
| 0.0688733 | 1 | 618  | 15 | 0.00572907 |
| 0.0716522 | 1 | 618  | 15 | 0.00572907 |
| 0.0694118 | 1 | 590  | 16 | 0.00857153 |
| 0.0636471 | 1 | 541  | 15 | 0.00841263 |
| 0.117282  | 1 | 1001 | 26 | 0.0076005  |
| 0.0713961 | 1 | 629  | 18 | 0.00814781 |

|           |          |      |    |            |
|-----------|----------|------|----|------------|
| 0.0689534 | 1        | 587  | 14 | 0.00700023 |
| 0.0966396 | 1        | 834  | 24 | 0.00623224 |
| 0.0697647 | 1        | 593  | 12 | 0.00615279 |
| 0.0714118 | 1        | 607  | 10 | 0.00821843 |
| 0.083499  | 1        | 714  | 20 | 0.00163309 |
| 0.0698824 | 1        | 594  | 17 | 0.0076976  |
| 0.0820808 | 1        | 699  | 19 | 0.00549955 |
| 0.0937647 | 1        | 797  | 22 | 0.00790946 |
| 0.0545455 | 1        | 465  | 13 | 0.00604686 |
| 0.0701674 | 1        | 612  | 18 | 0.00963966 |
| 0.0728235 | 1        | 619  | 18 | 0.0068943  |
| 0.0380718 | 1        | 526  | 15 | 0.0099398  |
| 0.0615205 | 1        | 526  | 15 | 0.0099398  |
| 0.040348  | 1        | 807  | 17 | 0.00636465 |
| 0.0718824 | 1        | 611  | 17 | 0.00555251 |
| 0.0955553 | 1        | 832  | 23 | 0.00767995 |
| 0.0489863 | 1        | 418  | 12 | 0.00642644 |
| 0.0835473 | 1        | 716  | 20 | 0.00841263 |
| 0.07223   | 1        | 618  | 13 | 0.00306315 |
| 0.0806452 | 1        | 690  | 17 | 0.00281598 |
| 0.0738983 | 1        | 654  | 18 | 0.00559665 |
| 0.0697647 | 1        | 593  | 13 | 0.00507583 |
| 0.0698824 | 1        | 594  | 12 | 0.00697375 |
| 0.0648249 | 1        | 596  | 17 | 0.00939249 |
| 0.0274554 | 1        | 589  | 17 | 0.00860684 |
| 0.0720616 | 1        | 618  | 15 | 0.00948077 |
| 0.0975979 | 1        | 837  | 20 | 0.0042637  |
| 0.0570588 | 1        | 485  | 13 | 0.00614396 |
| 0.0707468 | 1        | 630  | 18 | 0.00721209 |
| 0.0745882 | 1        | 634  | 17 | 0.00737981 |
| 0.118     | 1        | 1003 | 28 | 0.0072474  |
| 0.0744706 | 1        | 633  | 18 | 0.00745043 |
| 0.0674437 | 1        | 839  | 18 | 0.00757402 |
| 0.0724994 | 1        | 619  | 18 | 0.00852739 |
| 0.0696069 | 1        | 595  | 17 | 0.00657651 |
| 0.0494727 | 1        | 760  | 18 | 0.00717678 |
| 0.0894118 | 1        | 760  | 18 | 0.00717678 |
| 0.0636321 | 1        | 541  | 11 | 0.00816546 |
| 0.122207  | 1        | 1039 | 21 | 0.0054201  |
| 0.112436  | 1        | 962  | 24 | 0.00768878 |
| 0.101683  | 1        | 870  | 23 | 0.00765347 |
| 0.0493582 | 1        | 546  | 13 | 0.00820077 |
| 0.0896777 | 1        | 768  | 22 | 0.00774174 |
| 0.042249  | 0.721519 | 553  | 13 | 0.00947194 |
| 0.0632072 | 1        | 553  | 13 | 0.00947194 |
| 0.0753647 | 1        | 651  | 18 | 0.00629403 |
| 0.0594118 | 1        | 505  | 14 | 0.00782119 |

|           |          |      |    |            |
|-----------|----------|------|----|------------|
| 0.0774027 | 1        | 658  | 17 | 0.0092689  |
| 0.111202  | 1        | 952  | 27 | 0.0073445  |
| 0.195655  | 1        | 1675 | 46 | 0.00196854 |
| 0.0717047 | 1        | 612  | 15 | 0.00768878 |
| 0.0655221 | 1        | 561  | 12 | 0.00604686 |
| 0.0607059 | 1        | 516  | 12 | 0.00802422 |
| 0.0436866 | 1        | 620  | 16 | 0.00932187 |
| 0.0598224 | 1        | 849  | 20 | 0.00737981 |
| 0.0725164 | 1        | 619  | 13 | 0.00840381 |
| 0.256032  | 1        | 2186 | 50 | 0.00186261 |
| 0.145765  | 1        | 1239 | 30 | 0.00129765 |
| 0.0998823 | 1        | 849  | 22 | 0.00546424 |
| 0.0509247 | 1        | 749  | 21 | 0.00722092 |
| 0.0756342 | 1        | 650  | 17 | 0.00995745 |
| 0.0825117 | 1        | 703  | 20 | 0.00172137 |
| 0.0565969 | 1        | 619  | 17 | 0.00720326 |
| 0.0196619 | 0.304498 | 867  | 18 | 0.00475804 |
| 0.0505697 | 1        | 679  | 20 | 0.00758285 |
| 0.0766366 | 1        | 1029 | 26 | 0.00297488 |
| 0.0704706 | 1        | 599  | 13 | 0.00629403 |
| 0.118     | 1        | 1003 | 27 | 0.00604686 |
| 0.185354  | 1        | 1587 | 40 | 0.00178316 |
| 0.184728  | 1        | 1587 | 40 | 0.00178316 |
| 0.0555424 | 1        | 704  | 20 | 0.00690313 |
| 0.0818319 | 1        | 704  | 20 | 0.00690313 |
| 0.111437  | 1        | 950  | 26 | 0.00145654 |
| 0.12139   | 1        | 1034 | 26 | 0.00694727 |
| 0.0314273 | 1        | 587  | 15 | 0.00481983 |
| 0.0751765 | 1        | 639  | 18 | 0.00969263 |
| 0.082     | 1        | 697  | 17 | 0.00680602 |
| 0.0809412 | 1        | 688  | 18 | 0.00683251 |
| 0.0901006 | 1        | 770  | 22 | 0.00798008 |
| 0.0804706 | 1        | 684  | 19 | 0.00540245 |
| 0.0942353 | 1        | 801  | 23 | 0.00761816 |
| 0.0832161 | 1        | 710  | 20 | 0.009622   |
| 0.106607  | 1        | 910  | 25 | 0.00210095 |
| 0.0965882 | 1        | 821  | 17 | 0.00561431 |
| 0.147647  | 1        | 1255 | 35 | 0.00172137 |
| 0.0688235 | 1        | 585  | 13 | 0.00865981 |
| 0.0724706 | 1        | 616  | 10 | 0.00864215 |
| 0.0910588 | 1        | 774  | 17 | 0.00246288 |
| 0.0752083 | 1        | 641  | 18 | 0.00361929 |
| 0.0594118 | 0.858844 | 588  | 10 | 0.00865981 |
| 0.067981  | 1        | 600  | 17 | 0.00911001 |
| 0.0758824 | 1        | 645  | 17 | 0.0080154  |
| 0.0722353 | 1        | 614  | 17 | 0.00725623 |
| 0.0870588 | 1        | 740  | 18 | 0.00499638 |

|           |          |      |    |            |
|-----------|----------|------|----|------------|
| 0.0702353 | 1        | 597  | 17 | 0.00925125 |
| 0.0877377 | 1        | 752  | 20 | 0.00658534 |
| 0.0614158 | 1        | 524  | 13 | 0.00180964 |
| 0.072     | 1        | 612  | 13 | 0.00981621 |
| 0.0737381 | 1        | 634  | 18 | 0.00925125 |
| 0.076268  | 1        | 806  | 17 | 0.00626754 |
| 0.0835294 | 1        | 710  | 19 | 0.00685899 |
| 0.0746635 | 1        | 638  | 17 | 0.00842146 |
| 0.0726526 | 1        | 619  | 10 | 0.0068943  |
| 0.121937  | 1        | 1040 | 27 | 0.00717678 |
| 0.0707059 | 1        | 601  | 17 | 0.00956904 |
| 0.0730178 | 1        | 722  | 14 | 0.0080154  |
| 0.0686411 | 1        | 591  | 10 | 0.00885401 |
| 0.0653581 | 1        | 606  | 17 | 0.00678837 |
| 0.0725608 | 1        | 618  | 16 | 0.00950725 |
| 0.0873809 | 1        | 752  | 21 | 0.00738864 |
| 0.0714369 | 1        | 611  | 17 | 0.00841263 |
| 0.0615294 | 1        | 523  | 14 | 0.00880987 |
| 0.0938049 | 1        | 801  | 20 | 0.0049699  |
| 0.0721007 | 1        | 613  | 13 | 0.00783002 |
| 0.112706  | 1        | 958  | 27 | 0.00746809 |
| 0.0840541 | 1        | 758  | 22 | 0.00551721 |
| 0.0888524 | 1        | 758  | 22 | 0.00551721 |
| 0.0282555 | 1        | 414  | 12 | 0.00918946 |
| 0.0698824 | 1        | 594  | 13 | 0.00976324 |
| 0.0811765 | 1        | 690  | 16 | 0.00786533 |
| 0.0521176 | 0.642029 | 690  | 16 | 0.00786533 |
| 0.0604208 | 1        | 514  | 14 | 0.0088187  |
| 0.0528235 | 1        | 449  | 13 | 0.00668244 |
| 0.0699038 | 1        | 596  | 12 | 0.00934835 |
| 0.0879069 | 1        | 748  | 21 | 0.00637347 |
| 0.0689938 | 1        | 589  | 17 | 0.00991331 |
| 0.0914841 | 1        | 781  | 17 | 0.00771526 |
| 0.072     | 1        | 612  | 17 | 0.00771526 |
| 0.102706  | 1        | 873  | 24 | 0.00162426 |
| 0.0704556 | 1        | 600  | 17 | 0.00636465 |
| 0.0545882 | 1        | 464  | 14 | 0.00732685 |
| 0.072     | 1        | 612  | 12 | 0.0083685  |
| 0.0758072 | 1        | 648  | 17 | 0.00686782 |
| 0.0955451 | 1        | 815  | 23 | 0.0065412  |
| 0.113013  | 1        | 964  | 23 | 0.0066383  |
| 0.113372  | 1        | 964  | 23 | 0.0066383  |
| 0.0882015 | 1        | 1152 | 31 | 0.00768878 |
| 0.0590621 | 1        | 597  | 17 | 0.00936601 |
| 0.0458455 | 1        | 485  | 14 | 0.00890698 |
| 0.0689898 | 1        | 588  | 12 | 0.00600272 |
| 0.0787251 | 1        | 867  | 23 | 0.00677071 |

|           |          |     |    |            |
|-----------|----------|-----|----|------------|
| 0.0687713 | 1        | 586 | 17 | 0.00894229 |
| 0.0771576 | 1        | 658 | 17 | 0.00802422 |
| 0.088294  | 1        | 752 | 20 | 0.00661182 |
| 0.0475673 | 1        | 613 | 14 | 0.00671775 |
| 0.0705882 | 0.990099 | 606 | 17 | 0.00692961 |
| 0.0685733 | 1        | 621 | 14 | 0.00737981 |
| 0.0735517 | 1        | 631 | 18 | 0.00763581 |
| 0.0704209 | 1        | 599 | 17 | 0.00837732 |
| 0.0693448 | 1        | 599 | 17 | 0.00837732 |
| 0.0270588 | 0.242872 | 947 | 27 | 0.00834201 |
| 0.077642  | 1        | 947 | 27 | 0.00834201 |
| 0.112588  | 1        | 957 | 17 | 0.00685016 |
| 0.0858288 | 1        | 771 | 22 | 0.00827139 |
| 0.0887635 | 1        | 771 | 22 | 0.00827139 |
| 0.0835468 | 1        | 750 | 21 | 0.00493459 |
| 0.0468225 | 1        | 725 | 20 | 0.00666478 |
| 0.0804249 | 1        | 689 | 19 | 0.00723857 |
| 0.0925492 | 1        | 790 | 20 | 0.00572907 |
| 0.0965129 | 1        | 822 | 19 | 0.00963966 |
| 0.0644242 | 1        | 588 | 16 | 0.0074063  |
| 0.0703529 | 1        | 598 | 13 | 0.00998393 |
| 0.0683614 | 1        | 597 | 13 | 0.00970145 |
| 0.0544739 | 1        | 775 | 22 | 0.00808601 |
| 0.0465617 | 1        | 627 | 18 | 0.00670009 |
| 0.0695008 | 1        | 600 | 17 | 0.00772409 |
| 0.0853158 | 1        | 728 | 20 | 0.00627637 |
| 0.0704258 | 1        | 607 | 15 | 0.00744161 |
| 0.0491765 | 1        | 418 | 12 | 0.00745043 |
| 0.0645882 | 1        | 549 | 16 | 0.00670009 |
| 0.037095  | 1        | 593 | 11 | 0.00991331 |
| 0.026446  | 1        | 342 | 10 | 0.00949842 |
| 0.0577647 | 1        | 491 | 14 | 0.00614396 |
| 0.0796668 | 1        | 679 | 19 | 0.00835967 |
| 0.0550523 | 1        | 468 | 12 | 0.00636465 |
| 0.0991765 | 1        | 843 | 23 | 0.00757402 |
| 0.0810588 | 1        | 689 | 20 | 0.00685016 |
| 0.0725882 | 1        | 617 | 15 | 0.00771526 |
| 0.0694477 | 1        | 591 | 17 | 0.00976324 |
| 0.0695294 | 1        | 591 | 17 | 0.00976324 |
| 0.0717979 | 1        | 611 | 13 | 0.00923359 |
| 0.0273388 | 0.385366 | 615 | 12 | 0.00957787 |
| 0.0723529 | 1        | 615 | 12 | 0.00957787 |
| 0.0747059 | 1        | 635 | 18 | 0.00652354 |
| 0.037622  | 1        | 605 | 16 | 0.00632934 |
| 0.0738824 | 1        | 628 | 13 | 0.00850974 |
| 0.0794135 | 1        | 677 | 19 | 0.00745043 |
| 0.0851765 | 1        | 724 | 20 | 0.00608217 |

|           |   |     |    |            |
|-----------|---|-----|----|------------|
| 0.0707437 | 1 | 605 | 17 | 0.00772409 |
| 0.102012  | 1 | 872 | 22 | 0.00717678 |
| 0.0717647 | 1 | 610 | 17 | 0.00947194 |
| 0.0504706 | 1 | 429 | 12 | 0.00674423 |
| 0.0677699 | 1 | 602 | 17 | 0.0095249  |
| 0.0403993 | 1 | 688 | 18 | 0.00624106 |
| 0.0875716 | 1 | 749 | 16 | 0.00710616 |
| 0.0476301 | 1 | 409 | 12 | 0.00998393 |
| 0.0865885 | 1 | 849 | 24 | 0.00685016 |
| 0.071857  | 1 | 611 | 16 | 0.00786533 |
| 0.0564596 | 1 | 680 | 18 | 0.00765347 |
| 0.0694228 | 1 | 623 | 17 | 0.0068943  |
| 0.0700973 | 1 | 598 | 14 | 0.00559665 |
| 0.0920492 | 1 | 800 | 22 | 0.00527003 |
| 0.0707059 | 1 | 601 | 13 | 0.00873925 |
| 0.0755294 | 1 | 642 | 18 | 0.00813898 |
| 0.0600164 | 1 | 512 | 11 | 0.00943663 |
| 0.0493336 | 1 | 422 | 12 | 0.00677071 |
| 0.0718824 | 1 | 611 | 15 | 0.00913649 |
| 0.0699883 | 1 | 597 | 17 | 0.00623224 |
| 0.076216  | 1 | 655 | 19 | 0.00905704 |
| 0.0330751 | 1 | 619 | 18 | 0.00971028 |
| 0.0800554 | 1 | 751 | 22 | 0.00310729 |
| 0.0765882 | 1 | 651 | 18 | 0.00918063 |
| 0.0535167 | 1 | 821 | 23 | 0.00672658 |
| 0.0908235 | 1 | 772 | 21 | 0.00704437 |
| 0.0792941 | 1 | 674 | 18 | 0.00810367 |
| 0.0474055 | 1 | 835 | 24 | 0.0070532  |
| 0.0982353 | 1 | 835 | 24 | 0.0070532  |
| 0.0317833 | 1 | 596 | 17 | 0.00624106 |
| 0.0831765 | 1 | 707 | 20 | 0.00841263 |
| 0.0304127 | 1 | 496 | 14 | 0.00935718 |
| 0.0724706 | 1 | 616 | 17 | 0.0070532  |
| 0.0723939 | 1 | 616 | 17 | 0.0070532  |
| 0.0685734 | 1 | 585 | 17 | 0.00957787 |
| 0.0688073 | 1 | 585 | 17 | 0.00957787 |
| 0.0750205 | 1 | 640 | 18 | 0.00671775 |
| 0.0485358 | 1 | 832 | 24 | 0.00797126 |
| 0.0718724 | 1 | 613 | 17 | 0.00790946 |
| 0.0843529 | 1 | 717 | 20 | 0.0081125  |
| 0.117294  | 1 | 997 | 28 | 0.00717678 |
| 0.0664425 | 1 | 573 | 16 | 0.0064794  |
| 0.0732365 | 1 | 625 | 18 | 0.00963966 |
| 0.106904  | 1 | 929 | 24 | 0.00677071 |
| 0.0955294 | 1 | 812 | 19 | 0.00741512 |
| 0.0953164 | 1 | 812 | 19 | 0.00741512 |
| 0.0932941 | 1 | 793 | 20 | 0.0068943  |

|           |   |      |     |            |
|-----------|---|------|-----|------------|
| 0.07213   | 1 | 617  | 13  | 0.00877456 |
| 0.0608235 | 1 | 517  | 10  | 0.00841263 |
| 0.0421558 | 1 | 1106 | 30  | 0.00181847 |
| 0.401214  | 1 | 4561 | 124 | 0.00210095 |
| 0.136806  | 1 | 1166 | 31  | 0.00210978 |
| 0.0843529 | 1 | 717  | 19  | 0.00737981 |
| 0.0758824 | 1 | 645  | 18  | 0.00973676 |
| 0.0968458 | 1 | 829  | 22  | 0.0049081  |
| 0.061652  | 1 | 618  | 11  | 0.00814781 |
| 0.11102   | 1 | 946  | 23  | 0.00210095 |
| 0.0733396 | 1 | 625  | 13  | 0.00594975 |
| 0.0727294 | 1 | 619  | 16  | 0.00879222 |
| 0.0352549 | 1 | 592  | 10  | 0.00859801 |
| 0.0705882 | 1 | 600  | 17  | 0.00844794 |
| 0.0708235 | 1 | 602  | 12  | 0.00961318 |
| 0.0476636 | 1 | 612  | 15  | 0.00778588 |
| 0.072     | 1 | 612  | 15  | 0.00778588 |
| 0.0680806 | 1 | 581  | 13  | 0.00144771 |
| 0.0192884 | 1 | 644  | 18  | 0.00887167 |
| 0.0447346 | 1 | 644  | 18  | 0.00887167 |
| 0.0782353 | 1 | 665  | 19  | 0.00700023 |
| 0.0716471 | 1 | 609  | 17  | 0.00700023 |
| 0.0415672 | 1 | 679  | 19  | 0.00672658 |
| 0.0685076 | 1 | 583  | 11  | 0.00910118 |
| 0.100141  | 1 | 853  | 22  | 0.0049699  |
| 0.0407468 | 1 | 347  | 10  | 0.00768878 |
| 0.0958824 | 1 | 815  | 23  | 0.00163309 |
| 0.0701011 | 1 | 596  | 12  | 0.00272771 |
| 0.0563025 | 1 | 804  | 21  | 0.00667361 |
| 0.0428846 | 1 | 804  | 21  | 0.00667361 |
| 0.0750588 | 1 | 638  | 18  | 0.00538479 |
| 0.0887059 | 1 | 754  | 18  | 0.00604686 |
| 0.0528801 | 1 | 784  | 21  | 0.00511997 |
| 0.0835294 | 1 | 710  | 18  | 0.00822726 |
| 0.0778823 | 1 | 662  | 19  | 0.00747692 |
| 0.0970588 | 1 | 825  | 22  | 0.00780354 |
| 0.128118  | 1 | 1089 | 28  | 0.00608217 |
| 0.0904706 | 1 | 769  | 22  | 0.00850091 |
| 0.0799248 | 1 | 680  | 19  | 0.00873925 |
| 0.0716972 | 1 | 610  | 17  | 0.00813015 |
| 0.0637647 | 1 | 542  | 15  | 0.0062852  |
| 0.0782802 | 1 | 670  | 19  | 0.00498755 |
| 0.0806169 | 1 | 690  | 17  | 0.00668244 |
| 0.123059  | 1 | 1046 | 26  | 0.00190675 |
| 0.0711818 | 1 | 618  | 17  | 0.0096838  |
| 0.127854  | 1 | 1092 | 29  | 0.00186261 |
| 0.0787872 | 1 | 673  | 19  | 0.00685899 |

|           |   |      |    |            |
|-----------|---|------|----|------------|
| 0.0828588 | 1 | 713  | 18 | 0.0076005  |
| 0.0838824 | 1 | 713  | 18 | 0.0076005  |
| 0.0788235 | 1 | 670  | 19 | 0.00201268 |
| 0.066     | 1 | 561  | 12 | 0.00601155 |
| 0.184824  | 1 | 1571 | 31 | 0.00201268 |
| 0.0990588 | 1 | 842  | 17 | 0.00728271 |
| 0.0769412 | 1 | 654  | 19 | 0.00768878 |
| 0.0652216 | 1 | 677  | 18 | 0.00899525 |
| 0.061822  | 1 | 530  | 15 | 0.009622   |
| 0.0510597 | 1 | 530  | 15 | 0.009622   |
| 0.044934  | 1 | 620  | 17 | 0.00906587 |
| 0.0705882 | 1 | 600  | 13 | 0.0042637  |
| 0.0690588 | 1 | 587  | 14 | 0.00833319 |
| 0.0638824 | 1 | 543  | 12 | 0.0076005  |
| 0.0743718 | 1 | 731  | 19 | 0.00761816 |
| 0.0659457 | 1 | 561  | 16 | 0.00913649 |
| 0.111751  | 1 | 951  | 27 | 0.00733567 |
| 0.0655294 | 1 | 557  | 13 | 0.00780354 |
| 0.0756819 | 1 | 652  | 18 | 0.00784767 |
| 0.0492158 | 1 | 750  | 21 | 0.00761816 |
| 0.0877706 | 1 | 750  | 21 | 0.00761816 |
| 0.0510718 | 1 | 436  | 13 | 0.00741512 |
| 0.0511137 | 1 | 436  | 13 | 0.00741512 |
| 0.101294  | 1 | 861  | 23 | 0.00828022 |
| 0.103035  | 1 | 876  | 24 | 0.00802422 |
| 0.0738824 | 1 | 628  | 16 | 0.00589679 |
| 0.03968   | 1 | 610  | 18 | 0.00873925 |
| 0.038379  | 1 | 590  | 16 | 0.00858918 |
| 0.0685967 | 1 | 590  | 16 | 0.00858918 |
| 0.0446887 | 1 | 687  | 18 | 0.00772409 |
| 0.0798744 | 1 | 687  | 18 | 0.00772409 |
| 0.0756471 | 1 | 643  | 18 | 0.00196854 |
| 0.0877647 | 1 | 746  | 20 | 0.00957787 |
| 0.0743164 | 1 | 636  | 18 | 0.00975442 |
| 0.0692919 | 1 | 593  | 16 | 0.00604686 |
| 0.0659175 | 1 | 657  | 17 | 0.00986918 |
| 0.0919554 | 1 | 783  | 22 | 0.00678837 |
| 0.0698304 | 1 | 696  | 20 | 0.0063823  |
| 0.0637102 | 1 | 635  | 18 | 0.00813898 |
| 0.0615277 | 1 | 526  | 13 | 0.00732685 |
| 0.0546618 | 1 | 914  | 25 | 0.00684133 |
| 0.0938824 | 1 | 798  | 23 | 0.00507583 |
| 0.0885466 | 1 | 753  | 21 | 0.00709733 |
| 0.103879  | 1 | 889  | 39 | 0.00678837 |
| 0.0542353 | 1 | 461  | 11 | 0.00570258 |
| 0.0718824 | 1 | 611  | 17 | 0.00772409 |
| 0.0772941 | 1 | 657  | 18 | 0.00427252 |



|           |          |      |    |            |
|-----------|----------|------|----|------------|
| 0.0711711 | 1        | 849  | 24 | 0.00712381 |
| 0.0658824 | 1        | 560  | 16 | 0.00346922 |
| 0.141647  | 1        | 1204 | 29 | 0.00485514 |
| 0.0843529 | 1        | 717  | 20 | 0.0061881  |
| 0.076     | 1        | 646  | 14 | 0.00670892 |
| 0.0711765 | 1        | 605  | 13 | 0.00991331 |
| 0.0993541 | 1        | 846  | 23 | 0.00783002 |
| 0.110863  | 1        | 944  | 27 | 0.00143889 |
| 0.0713692 | 1        | 945  | 26 | 0.00939249 |
| 0.0998823 | 1        | 849  | 24 | 0.00728271 |
| 0.221529  | 1        | 1883 | 50 | 0.0014742  |
| 0.0545846 | 1        | 912  | 26 | 0.00200385 |
| 0.0684187 | 1        | 604  | 12 | 0.00994862 |
| 0.110331  | 1        | 974  | 28 | 0.00726506 |
| 0.0681921 | 1        | 602  | 17 | 0.00772409 |
| 0.081797  | 1        | 701  | 20 | 0.00690313 |
| 0.0784103 | 1        | 1022 | 29 | 0.00322205 |
| 0.0370569 | 1        | 483  | 13 | 0.00832436 |
| 0.109483  | 1        | 1427 | 34 | 0.00497873 |
| 0.0742353 | 1        | 631  | 18 | 0.00841263 |
| 0.0860035 | 1        | 977  | 27 | 0.00186261 |
| 0.114941  | 1        | 977  | 27 | 0.00186261 |
| 0.120785  | 1        | 1046 | 24 | 0.00265709 |
| 0.122583  | 1        | 1046 | 24 | 0.00265709 |
| 0.0934118 | 1        | 794  | 22 | 0.00261295 |
| 0.0691765 | 1        | 588  | 17 | 0.00645292 |
| 0.0695294 | 1        | 591  | 10 | 0.00504052 |
| 0.0203346 | 0.296108 | 591  | 10 | 0.00504052 |
| 0.0694967 | 1        | 591  | 13 | 0.00657651 |
| 0.080334  | 1        | 683  | 19 | 0.0069914  |
| 0.0397861 | 1        | 610  | 17 | 0.00641761 |
| 0.0708235 | 1        | 602  | 17 | 0.00848325 |
| 0.0658824 | 1        | 560  | 15 | 0.00798008 |
| 0.0784706 | 1        | 667  | 19 | 0.00629403 |
| 0.0501206 | 1        | 644  | 18 | 0.00722092 |
| 0.0985882 | 1        | 838  | 18 | 0.00601155 |
| 0.114588  | 1        | 974  | 27 | 0.00200385 |
| 0.0575294 | 1        | 489  | 14 | 0.00508466 |
| 0.0819711 | 1        | 697  | 19 | 0.0075034  |
| 0.0499967 | 1        | 753  | 21 | 0.00579086 |
| 0.0885882 | 1        | 753  | 21 | 0.00579086 |
| 0.0725759 | 1        | 619  | 18 | 0.00904822 |
| 0.08      | 1        | 680  | 18 | 0.00757402 |
| 0.0577944 | 1        | 588  | 16 | 0.0096838  |
| 0.0725844 | 1        | 619  | 18 | 0.00951608 |
| 0.0695897 | 1        | 619  | 18 | 0.00951608 |
| 0.0904706 | 1        | 769  | 21 | 0.00207447 |

|           |       |      |    |            |
|-----------|-------|------|----|------------|
| 0.206941  | 1     | 1759 | 43 | 0.00173902 |
| 0.0347202 | 1     | 590  | 16 | 0.00637347 |
| 0.114824  | 1     | 976  | 24 | 0.00543776 |
| 0.0734118 | 0.624 | 1000 | 28 | 0.0083067  |
| 0.117647  | 1     | 1000 | 28 | 0.0083067  |
| 0.0717647 | 1     | 610  | 12 | 0.00963966 |
| 0.0753143 | 1     | 641  | 18 | 0.0078565  |
| 0.0775294 | 1     | 659  | 18 | 0.00703554 |
| 0.110092  | 1     | 936  | 19 | 0.00674423 |
| 0.0683741 | 1     | 582  | 16 | 0.00869511 |
| 0.0375067 | 1     | 488  | 14 | 0.00841263 |
| 0.0385838 | 1     | 449  | 13 | 0.00941014 |
| 0.0702353 | 1     | 597  | 17 | 0.00728271 |
| 0.112727  | 1     | 961  | 21 | 0.0054819  |
| 0.0711903 | 1     | 619  | 17 | 0.00787415 |
| 0.122353  | 1     | 1040 | 28 | 0.00196854 |
| 0.0691883 | 1     | 589  | 17 | 0.00551721 |
| 0.0685882 | 1     | 583  | 16 | 0.00959552 |
| 0.0722712 | 1     | 680  | 19 | 0.00617044 |
| 0.033703  | 1     | 541  | 10 | 0.00853622 |
| 0.074594  | 1     | 643  | 18 | 0.00717678 |
| 0.0694118 | 1     | 590  | 16 | 0.00906587 |
| 0.0633276 | 1     | 550  | 16 | 0.00974559 |
| 0.0609709 | 1     | 628  | 13 | 0.0072474  |
| 0.0744131 | 1     | 634  | 18 | 0.00825374 |
| 0.0694118 | 1     | 590  | 17 | 0.00925125 |
| 0.0690588 | 1     | 587  | 15 | 0.009878   |
| 0.129647  | 1     | 1102 | 30 | 0.00744161 |
| 0.0503474 | 1     | 587  | 12 | 0.00854505 |
| 0.134156  | 1     | 1207 | 30 | 0.00109461 |
| 0.0750588 | 1     | 638  | 18 | 0.00843912 |
| 0.113658  | 1     | 967  | 27 | 0.0080154  |
| 0.0548112 | 1     | 810  | 23 | 0.00703554 |
| 0.0385204 | 1     | 629  | 18 | 0.00715913 |
| 0.0712525 | 1     | 607  | 17 | 0.00324853 |
| 0.0917948 | 1     | 782  | 21 | 0.00791829 |
| 0.0719138 | 1     | 614  | 18 | 0.00853622 |
| 0.0344185 | 1     | 443  | 13 | 0.00717678 |
| 0.0413931 | 1     | 643  | 18 | 0.00665596 |
| 0.0652941 | 1     | 555  | 14 | 0.00895994 |
| 0.131765  | 1     | 1120 | 31 | 0.00804188 |
| 0.123184  | 1     | 1102 | 26 | 0.00172137 |
| 0.0749412 | 1     | 637  | 18 | 0.00685016 |
| 0.0696471 | 1     | 592  | 16 | 0.00847443 |
| 0.0887059 | 1     | 754  | 21 | 0.00627637 |
| 0.0699954 | 1     | 607  | 10 | 0.00765347 |
| 0.0928314 | 1     | 799  | 20 | 0.00791829 |

|           |          |      |    |            |
|-----------|----------|------|----|------------|
| 0.193529  | 0.908338 | 1811 | 42 | 0.00196854 |
| 0.0800141 | 1        | 683  | 20 | 0.00763581 |
| 0.066     | 1        | 561  | 16 | 0.00661182 |
| 0.0738824 | 1        | 628  | 13 | 0.00678837 |
| 0.0791765 | 1        | 673  | 19 | 0.00190675 |
| 0.07      | 1        | 595  | 17 | 0.0094278  |
| 0.0596219 | 1        | 514  | 15 | 0.00722092 |
| 0.0734899 | 1        | 629  | 18 | 0.00626754 |
| 0.0864587 | 1        | 740  | 21 | 0.00803305 |
| 0.231059  | 1        | 1964 | 52 | 0.00106813 |
| 0.0574989 | 1        | 669  | 18 | 0.00658534 |
| 0.0631963 | 1        | 692  | 18 | 0.00843029 |
| 0.0814118 | 1        | 692  | 18 | 0.00843029 |
| 0.0661187 | 1        | 724  | 20 | 0.00783002 |
| 0.0851765 | 1        | 724  | 20 | 0.00783002 |
| 0.0701176 | 1        | 596  | 17 | 0.00745043 |
| 0.0727722 | 1        | 619  | 17 | 0.00957787 |
| 0.0673946 | 1        | 574  | 12 | 0.00694727 |
| 0.104771  | 1        | 896  | 19 | 0.00690313 |
| 0.0686389 | 1        | 587  | 10 | 0.00808601 |
| 0.0502353 | 1        | 427  | 12 | 0.00657651 |
| 0.127882  | 1        | 1087 | 30 | 0.00200385 |
| 0.123647  | 1        | 1051 | 29 | 0.00196854 |
| 0.0851765 | 1        | 724  | 20 | 0.00581734 |
| 0.109634  | 1        | 932  | 26 | 0.00587913 |
| 0.0944595 | 1        | 803  | 19 | 0.00771526 |
| 0.0697513 | 1        | 603  | 17 | 0.00866863 |
| 0.0657653 | 1        | 929  | 19 | 0.00414894 |
| 0.0710588 | 1        | 604  | 16 | 0.00983387 |
| 0.0473595 | 1        | 669  | 18 | 0.00723857 |
| 0.0916228 | 1        | 852  | 16 | 0.00653237 |
| 0.0765882 | 1        | 651  | 13 | 0.00790946 |
| 0.0727059 | 1        | 618  | 15 | 0.00694727 |
| 0.113245  | 1        | 967  | 26 | 0.00128882 |
| 0.0725182 | 1        | 618  | 14 | 0.00624106 |
| 0.0755294 | 1        | 642  | 18 | 0.0078565  |
| 0.218353  | 1        | 1856 | 51 | 0.00162426 |
| 0.192978  | 1        | 1660 | 34 | 0.00162426 |
| 0.13183   | 1        | 1134 | 27 | 0.00159778 |
| 0.0702353 | 1        | 597  | 17 | 0.00742395 |
| 0.0702538 | 1        | 598  | 16 | 0.00604686 |
| 0.136866  | 1        | 1165 | 27 | 0.00165075 |
| 0.0964706 | 1        | 820  | 20 | 0.00180964 |
| 0.0888054 | 1        | 756  | 21 | 0.00821843 |
| 0.0889412 | 1        | 756  | 21 | 0.00821843 |
| 0.108305  | 1        | 922  | 25 | 0.00135061 |
| 0.108471  | 1        | 922  | 25 | 0.00135061 |

|           |          |      |    |            |
|-----------|----------|------|----|------------|
| 0.0704242 | 1        | 601  | 17 | 0.00803305 |
| 0.0639054 | 1        | 827  | 23 | 0.00427252 |
| 0.0696471 | 1        | 592  | 12 | 0.00694727 |
| 0.0483529 | 1        | 411  | 12 | 0.00842146 |
| 0.0825882 | 1        | 702  | 19 | 0.00814781 |
| 0.0687313 | 1        | 597  | 15 | 0.00575555 |
| 0.0924476 | 1        | 803  | 22 | 0.00169488 |
| 0.106148  | 0.99568  | 926  | 25 | 0.00783002 |
| 0.065494  | 1        | 592  | 11 | 0.00963966 |
| 0.0742353 | 1        | 631  | 18 | 0.00650589 |
| 0.077906  | 1        | 817  | 18 | 0.00780354 |
| 0.0718885 | 1        | 614  | 12 | 0.00996628 |
| 0.072     | 1        | 612  | 17 | 0.00614396 |
| 0.0695294 | 1        | 591  | 13 | 0.00489928 |
| 0.116757  | 1        | 995  | 28 | 0.00357515 |
| 0.0581176 | 1        | 494  | 10 | 0.00937483 |
| 0.047665  | 1        | 494  | 10 | 0.00937483 |
| 0.0679135 | 1        | 581  | 13 | 0.00765347 |
| 0.0799532 | 1        | 684  | 19 | 0.0083685  |
| 0.0269815 | 1        | 913  | 26 | 0.00508466 |
| 0.0364383 | 1        | 1233 | 35 | 0.00193323 |
| 0.0256221 | 1        | 867  | 20 | 0.00632051 |
| 0.0320645 | 1        | 1085 | 31 | 0.00186261 |
| 0.0296708 | 1        | 1004 | 28 | 0.00658534 |
| 0.030055  | 1        | 1017 | 29 | 0.00123585 |
| 0.0692124 | 1        | 609  | 17 | 0.00854505 |
| 0.0177315 | 1        | 600  | 17 | 0.00812133 |
| 0.0484616 | 0.991892 | 740  | 21 | 0.00667361 |
| 0.0880679 | 1        | 758  | 17 | 0.00566727 |
| 0.0703529 | 1        | 598  | 14 | 0.00719444 |
| 0.0400703 | 1        | 342  | 10 | 0.0094278  |
| 0.12968   | 1        | 1105 | 28 | 0.00641761 |
| 0.071897  | 0.943164 | 651  | 19 | 0.0063823  |
| 0.0660043 | 1        | 651  | 19 | 0.0063823  |
| 0.128706  | 1        | 1094 | 30 | 0.00129765 |
| 0.0792941 | 1        | 674  | 19 | 0.00648823 |
| 0.134941  | 1        | 1147 | 32 | 0.00148303 |
| 0.134697  | 1        | 1146 | 33 | 0.0039106  |
| 0.0715289 | 1        | 611  | 17 | 0.00998393 |
| 0.085044  | 1        | 725  | 21 | 0.00671775 |
| 0.0865882 | 1        | 736  | 19 | 0.00574672 |
| 0.103802  | 1        | 890  | 22 | 0.00379584 |
| 0.0857647 | 1        | 729  | 21 | 0.0029837  |
| 0.0690588 | 1        | 587  | 11 | 0.00476687 |
| 0.0749412 | 1        | 637  | 12 | 0.00530534 |
| 0.118471  | 1        | 1007 | 23 | 0.00460797 |
| 0.0485963 | 1        | 547  | 13 | 0.0099398  |

|           |   |      |    |            |
|-----------|---|------|----|------------|
| 0.0692174 | 1 | 597  | 17 | 0.0089158  |
| 0.0795294 | 1 | 676  | 14 | 0.00604686 |
| 0.0368102 | 1 | 601  | 17 | 0.00764464 |
| 0.0339395 | 1 | 601  | 17 | 0.00764464 |
| 0.0635193 | 1 | 592  | 17 | 0.00925125 |
| 0.0711856 | 1 | 607  | 17 | 0.00762698 |
| 0.0703343 | 1 | 606  | 14 | 0.00666478 |
| 0.0692941 | 1 | 589  | 16 | 0.00717678 |
| 0.098332  | 1 | 843  | 23 | 0.00744161 |
| 0.0929412 | 1 | 790  | 19 | 0.00742395 |
| 0.0581853 | 1 | 606  | 13 | 0.00936601 |
| 0.0715538 | 1 | 612  | 18 | 0.00788298 |
| 0.0881176 | 1 | 749  | 21 | 0.00894229 |
| 0.106     | 1 | 901  | 17 | 0.00842146 |
| 0.0703529 | 1 | 598  | 13 | 0.00972794 |
| 0.108824  | 1 | 925  | 26 | 0.00813898 |
| 0.130118  | 1 | 1106 | 30 | 0.00790064 |
| 0.113658  | 1 | 967  | 26 | 0.0044579  |
| 0.08063   | 1 | 686  | 15 | 0.00624989 |
| 0.0534647 | 1 | 456  | 13 | 0.00662065 |
| 0.0594498 | 1 | 631  | 23 | 0.00816546 |
| 0.0690649 | 1 | 599  | 17 | 0.00944545 |
| 0.0650588 | 1 | 553  | 11 | 0.00854505 |
| 0.100353  | 1 | 853  | 24 | 0.00200385 |
| 0.124797  | 1 | 1077 | 26 | 0.00181847 |
| 0.100197  | 1 | 915  | 21 | 0.00678837 |
| 0.097131  | 1 | 887  | 22 | 0.00135061 |
| 0.111059  | 1 | 944  | 20 | 0.00172137 |
| 0.0827059 | 1 | 703  | 19 | 0.00812133 |
| 0.134775  | 1 | 1153 | 32 | 0.00196854 |
| 0.120281  | 1 | 1029 | 26 | 0.00757402 |
| 0.113267  | 1 | 969  | 27 | 0.00200385 |
| 0.0680544 | 1 | 595  | 17 | 0.00886284 |
| 0.110667  | 1 | 941  | 22 | 0.0042637  |
| 0.0462043 | 1 | 493  | 14 | 0.00967497 |
| 0.10806   | 1 | 1153 | 27 | 0.0020215  |
| 0.0703189 | 1 | 602  | 13 | 0.00531417 |
| 0.128878  | 1 | 1159 | 28 | 0.00754754 |
| 0.0821295 | 1 | 705  | 20 | 0.00512879 |
| 0.11335   | 1 | 973  | 27 | 0.00771526 |
| 0.068849  | 1 | 591  | 11 | 0.00321322 |
| 0.104954  | 1 | 894  | 24 | 0.00456383 |
| 0.1444    | 1 | 1230 | 28 | 0.00154482 |
| 0.0760383 | 1 | 1104 | 28 | 0.00181847 |
| 0.0967698 | 1 | 1405 | 35 | 0.00572907 |
| 0.134756  | 1 | 1181 | 30 | 0.0014742  |
| 0.125285  | 1 | 1098 | 26 | 0.00624989 |

|            |           |      |    |            |
|------------|-----------|------|----|------------|
| 0.0967059  | 1         | 822  | 23 | 0.0022775  |
| 0.0721238  | 1         | 615  | 16 | 0.00604686 |
| 0.294471   | 1         | 2503 | 70 | 0.00148303 |
| 0.0924706  | 1         | 786  | 20 | 0.00572907 |
| 0.0506954  | 1         | 667  | 19 | 0.00804188 |
| 0.0890242  | 1         | 760  | 17 | 0.00812133 |
| 0.040951   | 1         | 608  | 16 | 0.00979856 |
| 0.0455984  | 1         | 677  | 18 | 0.00458149 |
| 0.0713783  | 1         | 608  | 12 | 0.00948077 |
| 0.0675582  | 1         | 586  | 17 | 0.00837732 |
| 0.130699   | 1         | 1118 | 28 | 0.00580851 |
| 0.126023   | 1         | 1078 | 30 | 0.00201268 |
| 0.0618407  | 1         | 598  | 17 | 0.00949842 |
| 0.077285   | 1         | 657  | 18 | 0.00779471 |
| 0.0766896  | 1         | 657  | 18 | 0.00779471 |
| 0.0456509  | 1         | 761  | 22 | 0.00790946 |
| 0.0633473  | 1         | 1056 | 30 | 0.00300136 |
| 0.00569886 | 0.0878004 | 1082 | 28 | 0.00690313 |
| 0.0627059  | 1         | 533  | 14 | 0.00949842 |
| 0.0912941  | 1         | 776  | 22 | 0.00819195 |
| 0.102706   | 1         | 873  | 24 | 0.00481983 |
| 0.159572   | 1         | 1357 | 30 | 0.00637347 |
| 0.0977585  | 1         | 833  | 23 | 0.00703554 |
| 0.0954118  | 1         | 811  | 22 | 0.00700023 |
| 0.0687588  | 1         | 585  | 15 | 0.00969263 |
| 0.0897225  | 1         | 763  | 19 | 0.00664713 |
| 0.0387806  | 1         | 603  | 17 | 0.00814781 |
| 0.0958824  | 1         | 815  | 20 | 0.0086245  |
| 0.236775   | 1         | 2050 | 51 | 0.00161544 |
| 0.240752   | 1         | 2050 | 51 | 0.00161544 |
| 0.0594972  | 1         | 613  | 17 | 0.00880987 |
| 0.0807855  | 1         | 687  | 13 | 0.00249819 |
| 0.0419605  | 1         | 601  | 17 | 0.00924242 |
| 0.0566753  | 1         | 523  | 15 | 0.0079536  |
| 0.0681176  | 1         | 579  | 15 | 0.00787415 |
| 0.0869412  | 1         | 739  | 16 | 0.00788298 |
| 0.0811765  | 1         | 690  | 19 | 0.00684133 |
| 0.0832941  | 1         | 708  | 18 | 0.00623224 |
| 0.0490588  | 1         | 417  | 12 | 0.00949842 |
| 0.0686229  | 1         | 587  | 15 | 0.00747692 |
| 0.0692615  | 1         | 589  | 17 | 0.00802422 |
| 0.076      | 1         | 646  | 18 | 0.00831553 |
| 0.0727059  | 1         | 618  | 14 | 0.00743278 |
| 0.0972941  | 1         | 827  | 22 | 0.00645292 |
| 0.0402654  | 1         | 625  | 18 | 0.0078565  |
| 0.0727675  | 1         | 625  | 18 | 0.0078565  |
| 0.0686229  | 1         | 587  | 17 | 0.00996628 |

|           |          |      |    |            |
|-----------|----------|------|----|------------|
| 0.0201427 | 0.298126 | 587  | 17 | 0.00996628 |
| 0.0638322 | 1        | 563  | 16 | 0.00963966 |
| 0.0675278 | 1        | 596  | 12 | 0.0090747  |
| 0.118125  | 1        | 1134 | 29 | 0.00308081 |
| 0.13045   | 1        | 1116 | 31 | 0.00783884 |
| 0.0684916 | 1        | 603  | 17 | 0.0081125  |
| 0.08744   | 1        | 747  | 19 | 0.00660299 |
| 0.0909517 | 0.992337 | 783  | 22 | 0.00194206 |
| 0.0725456 | 1        | 617  | 16 | 0.00561431 |
| 0.068997  | 1        | 604  | 15 | 0.00949842 |
| 0.139529  | 1        | 1186 | 24 | 0.00614396 |
| 0.0688235 | 1        | 585  | 17 | 0.0075034  |
| 0.0685413 | 1        | 585  | 17 | 0.0075034  |
| 0.0703529 | 1        | 598  | 11 | 0.00694727 |
| 0.0828055 | 1        | 706  | 15 | 0.00768878 |
| 0.072292  | 1        | 616  | 16 | 0.00799774 |
| 0.0471924 | 1        | 611  | 18 | 0.00841263 |
| 0.0700956 | 1        | 601  | 15 | 0.00960435 |
| 0.0701857 | 1        | 601  | 15 | 0.00960435 |
| 0.0711681 | 1        | 605  | 15 | 0.00791829 |
| 0.0742639 | 1        | 681  | 17 | 0.00996628 |
| 0.0704706 | 1        | 599  | 17 | 0.00991331 |
| 0.101679  | 1        | 872  | 22 | 0.00762698 |
| 0.08      | 1        | 680  | 19 | 0.00690313 |
| 0.0311223 | 1        | 480  | 14 | 0.00780354 |
| 0.0420152 | 1        | 648  | 18 | 0.00794477 |
| 0.0779221 | 1        | 672  | 19 | 0.00535831 |
| 0.0758824 | 1        | 645  | 18 | 0.0080154  |
| 0.0610185 | 1        | 520  | 15 | 0.00752988 |
| 0.035008  | 1        | 1133 | 30 | 0.00842146 |
| 0.018261  | 1        | 591  | 13 | 0.00783002 |
| 0.0315474 | 1        | 1021 | 29 | 0.0083685  |
| 0.0691765 | 1        | 588  | 13 | 0.00682368 |
| 0.0737213 | 1        | 627  | 17 | 0.00693844 |
| 0.0933568 | 1        | 794  | 22 | 0.00717678 |
| 0.084676  | 1        | 720  | 19 | 0.00765347 |
| 0.0586672 | 1        | 618  | 15 | 0.00918946 |
| 0.0882353 | 1        | 750  | 21 | 0.00814781 |
| 0.0598389 | 1        | 572  | 12 | 0.0078565  |
| 0.0680999 | 1        | 586  | 17 | 0.00665596 |
| 0.0471346 | 1        | 607  | 17 | 0.00747692 |
| 0.0836028 | 1        | 724  | 21 | 0.0076976  |
| 0.0618762 | 1        | 558  | 16 | 0.0068943  |
| 0.0411938 | 1        | 755  | 19 | 0.00570258 |
| 0.0331187 | 1        | 607  | 17 | 0.00979856 |
| 0.0320275 | 1        | 587  | 16 | 0.00783002 |
| 0.0711985 | 1        | 619  | 16 | 0.00703554 |

|           |   |      |    |            |
|-----------|---|------|----|------------|
| 0.0489559 | 1 | 776  | 22 | 0.00747692 |
| 0.0694118 | 1 | 590  | 16 | 0.00710616 |
| 0.0689816 | 1 | 590  | 16 | 0.00710616 |
| 0.0504927 | 1 | 579  | 13 | 0.0093307  |
| 0.0724621 | 1 | 636  | 16 | 0.00664713 |
| 0.0704341 | 1 | 602  | 16 | 0.00700023 |
| 0.0699227 | 1 | 597  | 17 | 0.00886284 |
| 0.0802433 | 1 | 686  | 19 | 0.00137709 |
| 0.0773393 | 1 | 686  | 19 | 0.00137709 |
| 0.0715873 | 1 | 612  | 13 | 0.00544658 |
| 0.122235  | 1 | 1039 | 46 | 0.00692961 |



Fraction of negatively enriched windows in region

MAT-score on T(WTC vs. WTHF)

|   |          |
|---|----------|
| 1 | -3.90155 |
| 0 | 4.07521  |
| 1 | -4.08735 |
| 1 | -4.10049 |
| 0 | 5.07856  |
| 1 | -3.92384 |
| 0 | 4.22071  |
| 0 | 4.24394  |
| 0 | 4.07922  |
| 0 | 3.96262  |
| 1 | -3.94001 |
| 1 | -3.96604 |
| 0 | 5.17642  |
| 1 | -4.14038 |
| 1 | -4.01415 |
| 1 | -3.95346 |
| 0 | 4.10004  |
| 1 | -4.07643 |
| 1 | -4.03512 |
| 1 | -4.04247 |
| 0 | 3.94101  |
| 1 | -4.04387 |
| 1 | -4.02359 |
| 0 | 4.26043  |
| 0 | 4.39185  |
| 1 | -4.21036 |
| 1 | -4.09801 |
| 0 | 4.2736   |
| 0 | 4.91078  |
| 0 | 4.29846  |
| 0 | 4.47824  |
| 0 | 4.35826  |
| 1 | -4.17994 |
| 1 | -3.92873 |
| 1 | -4.08225 |
| 0 | 3.89671  |
| 1 | -3.92784 |
| 0 | 4.85985  |
| 0 | 4.37448  |
| 0 | 4.59524  |
| 0 | 4.18229  |
| 0 | 4.02555  |
| 0 | 5.00887  |
| 0 | 4.2521   |

|   |          |
|---|----------|
| 0 | 4.16311  |
| 0 | 4.12692  |
| 0 | 5.30103  |
| 1 | -4.08679 |
| 0 | 4.02925  |
| 0 | 5.06718  |
| 1 | -4.02561 |
| 0 | 4.43671  |
| 1 | -4.1977  |
| 1 | -4.02401 |
| 0 | 4.03362  |
| 0 | 4.01824  |
| 0 | 4.41092  |
| 0 | 4.03304  |
| 0 | 4.0779   |
| 0 | 4.66544  |
| 0 | 4.16693  |
| 0 | 5.02344  |
| 0 | 4.21329  |
| 0 | 4.2018   |
| 0 | 4.23719  |
| 0 | 4.11819  |
| 0 | 5.04818  |
| 0 | 4.60694  |
| 1 | -4.07964 |
| 0 | 4.04366  |
| 0 | 5.05678  |
| 0 | 4.28919  |
| 0 | 4.15535  |
| 0 | 4.06431  |
| 0 | 4.06431  |
| 0 | 4.15825  |
| 0 | 5.24334  |
| 0 | 3.91235  |
| 0 | 4.06525  |
| 0 | 4.25235  |
| 0 | 5.4422   |
| 0 | 4.08607  |
| 0 | 4.67424  |
| 0 | 4.34449  |
| 0 | 5.00464  |
| 0 | 5.29287  |
| 0 | 3.88739  |
| 0 | 4.01759  |
| 0 | 3.93652  |
| 0 | 4.27912  |
| 0 | 4.17043  |

|   |          |
|---|----------|
| 0 | 4.22781  |
| 0 | 4.14783  |
| 1 | -4.03304 |
| 0 | 4.23048  |
| 0 | 3.86578  |
| 0 | 3.86578  |
| 0 | 4.17822  |
| 0 | 4.19435  |
| 0 | 4.81551  |
| 0 | 4.07422  |
| 0 | 3.95533  |
| 0 | 4.17089  |
| 1 | -4.01931 |
| 0 | 4.16938  |
| 0 | 4.16938  |
| 0 | 4.17047  |
| 0 | 5.37179  |
| 0 | 4.34458  |
| 0 | 5.06415  |
| 1 | -4.01193 |
| 1 | -4.04275 |
| 0 | 5.1486   |
| 1 | -3.98602 |
| 1 | -4.00106 |
| 0 | 3.95132  |
| 1 | -4.0186  |
| 1 | -4.00673 |
| 0 | 5.06082  |
| 0 | 5.16766  |
| 0 | 4.13199  |
| 0 | 5.0188   |
| 0 | 3.87654  |
| 0 | 4.32109  |
| 0 | 5.17302  |
| 1 | -4.01128 |
| 0 | 4.12578  |
| 0 | 3.90041  |
| 1 | -4.02146 |
| 1 | -3.91734 |
| 1 | -3.92764 |
| 0 | 4.72317  |
| 0 | 5.03212  |
| 0 | 4.62476  |
| 0 | 5.28011  |
| 0 | 5.09355  |
| 0 | 4.51299  |
| 1 | -4.15616 |

|   |          |
|---|----------|
| 1 | -4.17292 |
| 0 | 4.00394  |
| 0 | 5.25778  |
| 1 | -3.904   |
| 1 | -4.09591 |
| 1 | -3.95763 |
| 0 | 3.87451  |
| 0 | 5.24575  |
| 1 | -4.02426 |
| 0 | 5.61269  |
| 1 | -3.96703 |
| 0 | 4.22806  |
| 0 | 5.00504  |
| 0 | 4.08155  |
| 0 | 5.17208  |
| 0 | 4.12663  |
| 0 | 5.06552  |
| 0 | 4.35848  |
| 0 | 5.07185  |
| 0 | 5.25718  |
| 0 | 4.50484  |
| 0 | 4.47992  |
| 0 | 4.00893  |
| 0 | 4.06731  |
| 0 | 4.60502  |
| 1 | -4.19736 |
| 0 | 4.06323  |
| 0 | 4.84436  |
| 0 | 4.06031  |
| 0 | 4.16665  |
| 0 | 4.17341  |
| 0 | 5.05654  |
| 0 | 4.15071  |
| 0 | 4.08394  |
| 0 | 4.17305  |
| 0 | 4.08298  |
| 0 | 4.11775  |
| 0 | 3.88491  |
| 0 | 4.05829  |
| 1 | -4.01876 |
| 0 | 4.15739  |
| 1 | -3.93618 |
| 1 | -4.0621  |
| 0 | 4.08518  |
| 0 | 4.05722  |
| 0 | 4.05722  |
| 0 | 4.02468  |

|   |          |
|---|----------|
| 1 | -4.17085 |
| 1 | -4.13766 |
| 0 | 4.23012  |
| 0 | 5.28943  |
| 1 | -4.17421 |
| 0 | 4.01924  |
| 0 | 5.30908  |
| 0 | 4.2666   |
| 0 | 5.48877  |
| 0 | 4.2741   |
| 0 | 3.87496  |
| 1 | -3.97166 |
| 0 | 4.18872  |
| 1 | -4.00394 |
| 1 | -4.00394 |
| 0 | 5.01687  |
| 0 | 5.22796  |
| 0 | 4.11224  |
| 0 | 4.19055  |
| 0 | 5.51372  |
| 0 | 3.93297  |
| 0 | 3.93297  |
| 0 | 4.49462  |
| 0 | 4.49462  |
| 1 | -3.89005 |
| 1 | -3.92014 |
| 1 | -3.90354 |
| 0 | 3.91023  |
| 0 | 3.95332  |
| 0 | 3.95332  |
| 0 | 4.20595  |
| 1 | -4.18612 |
| 1 | -4.13695 |
| 1 | -4.19193 |
| 0 | 4.12746  |
| 0 | 4.12746  |
| 0 | 4.06986  |
| 0 | 4.03142  |
| 0 | 5.14034  |
| 0 | 4.46879  |
| 1 | -3.95523 |
| 0 | 3.89189  |
| 0 | 3.99369  |
| 0 | 4.07895  |
| 0 | 4.16229  |
| 0 | 5.42829  |
| 0 | 4.20631  |

|   |          |
|---|----------|
| 0 | 4.16498  |
| 0 | 5.02664  |
| 1 | -3.89959 |
| 0 | 5.00747  |
| 1 | -3.94135 |
| 0 | 4.06398  |
| 1 | -4.01632 |
| 1 | -3.92701 |
| 1 | -4.07389 |
| 0 | 4.17333  |
| 1 | -4.01858 |
| 1 | -4.01858 |
| 1 | -4.03061 |
| 1 | -3.9746  |
| 1 | -4.06816 |
| 1 | -3.91774 |
| 0 | 4.07893  |
| 1 | -4.19698 |
| 1 | -3.8945  |
| 1 | -3.8945  |
| 0 | 4.4359   |
| 1 | -4.09226 |
| 0 | 3.93106  |
| 1 | -4.02287 |
| 1 | -4.20659 |
| 1 | -3.9804  |
| 1 | -3.9812  |
| 0 | 5.19177  |
| 0 | 4.24296  |
| 0 | 3.91933  |
| 0 | 4.02833  |
| 0 | 5.14174  |
| 0 | 4.56767  |
| 0 | 4.56767  |
| 1 | -3.87778 |
| 1 | -3.99498 |
| 0 | 4.14736  |
| 0 | 4.21393  |
| 0 | 4.54515  |
| 0 | 4.08226  |
| 0 | 5.1336   |
| 1 | -4.08788 |
| 1 | -4.1561  |
| 0 | 5.03741  |
| 1 | -4.10982 |
| 0 | 4.05746  |
| 0 | 4.10943  |

|   |          |
|---|----------|
| 1 | -4.1507  |
| 1 | -4.05985 |
| 0 | 4.13915  |
| 0 | 4.12487  |
| 1 | -4.18731 |
| 0 | 4.09846  |
| 0 | 4.41235  |
| 0 | 3.89472  |
| 0 | 4.16075  |
| 0 | 4.26549  |
| 0 | 4.00279  |
| 0 | 4.22257  |
| 0 | 4.10482  |
| 0 | 4.27826  |
| 0 | 5.16699  |
| 0 | 4.60355  |
| 1 | -3.89394 |
| 0 | 4.19635  |
| 1 | -4.08245 |
| 0 | 4.60278  |
| 0 | 4.60278  |
| 0 | 3.97057  |
| 0 | 3.88134  |
| 0 | 4.04936  |
| 0 | 5.56063  |
| 0 | 5.28326  |
| 0 | 5.35959  |
| 1 | -4.16612 |
| 0 | 5.21538  |
| 0 | 4.25465  |
| 0 | 4.67895  |
| 0 | 5.25528  |
| 0 | 4.28179  |
| 0 | 5.37927  |
| 1 | -3.89882 |
| 0 | 4.21034  |
| 0 | 4.02179  |
| 0 | 3.912    |
| 0 | 3.90491  |
| 0 | 4.17281  |
| 1 | -4.21787 |
| 0 | 3.96421  |
| 0 | 4.03758  |
| 0 | 5.02296  |
| 0 | 3.90832  |
| 1 | -3.99661 |
| 0 | 4.32889  |

|   |          |
|---|----------|
| 0 | 5.06994  |
| 0 | 4.41732  |
| 0 | 4.00369  |
| 0 | 5.31318  |
| 0 | 4.12208  |
| 0 | 3.89299  |
| 1 | -4.03172 |
| 0 | 3.91998  |
| 0 | 5.07569  |
| 0 | 5.57899  |
| 0 | 3.86761  |
| 0 | 4.03866  |
| 0 | 4.01775  |
| 1 | -3.94599 |
| 1 | -3.88578 |
| 0 | 3.86819  |
| 1 | -3.97437 |
| 1 | -3.99424 |
| 0 | 4.00639  |
| 0 | 4.00639  |
| 1 | -3.93174 |
| 1 | -4.01777 |
| 1 | -3.90521 |
| 0 | 4.05851  |
| 0 | 4.42247  |
| 0 | 3.94569  |
| 1 | -3.97433 |
| 1 | -3.94753 |
| 0 | 4.26884  |
| 0 | 4.15095  |
| 0 | 4.43271  |
| 0 | 4.14001  |
| 0 | 4.06645  |
| 0 | 4.07949  |
| 0 | 5.08525  |
| 0 | 4.33128  |
| 0 | 4.3474   |
| 0 | 5.0022   |
| 0 | 5.0022   |
| 0 | 4.51263  |
| 0 | 4.51263  |
| 0 | 4.36319  |
| 0 | 4.36319  |
| 0 | 3.86698  |
| 0 | 3.86698  |
| 0 | 4.05002  |
| 1 | -4.10911 |



|   |          |
|---|----------|
| 0 | 5.44048  |
| 1 | -4.21176 |
| 0 | 4.00682  |
| 0 | 3.87807  |
| 1 | -4.04887 |
| 0 | 4.17564  |
| 0 | 4.216    |
| 0 | 5.04704  |
| 0 | 3.89436  |
| 0 | 3.90198  |
| 0 | 3.9018   |
| 0 | 3.99186  |
| 0 | 4.55627  |
| 0 | 4.0931   |
| 0 | 4.223    |
| 0 | 4.29449  |
| 0 | 4.18588  |
| 1 | -4.08486 |
| 0 | 4.19423  |
| 1 | -4.01902 |
| 0 | 5.191    |
| 0 | 3.88972  |
| 0 | 4.12632  |
| 0 | 4.00741  |
| 0 | 4.20204  |
| 0 | 4.15393  |
| 0 | 4.27683  |
| 0 | 4.09992  |
| 0 | 4.28073  |
| 0 | 4.51018  |
| 0 | 4.09117  |
| 0 | 5.33491  |
| 0 | 3.96243  |
| 0 | 4.0314   |
| 0 | 4.20758  |
| 0 | 5.37662  |
| 0 | 4.49507  |
| 0 | 4.16198  |
| 0 | 5.0592   |
| 0 | 4.17484  |
| 0 | 5.21476  |
| 1 | -4.01935 |
| 0 | 5.07993  |
| 0 | 5.12806  |
| 0 | 5.15938  |
| 0 | 5.18856  |
| 0 | 4.07805  |

|   |          |
|---|----------|
| 1 | -3.91014 |
| 1 | -3.91014 |
| 0 | 3.95688  |
| 0 | 3.95688  |
| 1 | -3.90088 |
| 0 | 4.19813  |
| 0 | 3.91245  |
| 0 | 4.39106  |
| 1 | -4.07149 |
| 0 | 5.20748  |
| 0 | 4.1639   |
| 0 | 4.90901  |
| 0 | 5.10857  |
| 0 | 5.28143  |
| 0 | 5.28143  |
| 0 | 3.95887  |
| 0 | 3.95887  |
| 0 | 4.06914  |
| 0 | 4.58638  |
| 0 | 4.58638  |
| 0 | 4.08997  |
| 0 | 4.04307  |
| 0 | 4.3113   |
| 0 | 4.40952  |
| 0 | 3.89697  |
| 1 | -3.8852  |
| 0 | 4.72952  |
| 0 | 5.03016  |
| 0 | 4.07351  |
| 0 | 3.90288  |
| 0 | 4.05035  |
| 0 | 5.60526  |
| 0 | 3.87729  |
| 0 | 4.16831  |
| 0 | 4.74393  |
| 0 | 4.48934  |
| 0 | 5.01963  |
| 0 | 5.20125  |
| 0 | 3.964    |
| 0 | 4.06728  |
| 0 | 4.00283  |
| 1 | -4.15533 |
| 0 | 5.08108  |
| 1 | -4.05405 |
| 1 | -4.13522 |
| 1 | -4.12846 |
| 0 | 4.0353   |

|   |          |
|---|----------|
| 1 | -3.88725 |
| 0 | 3.86769  |
| 0 | 3.86769  |
| 1 | -4.10141 |
| 1 | -4.07408 |
| 0 | 3.89111  |
| 0 | 3.92321  |
| 0 | 4.27196  |
| 1 | -4.04826 |
| 1 | -4.06059 |
| 1 | -4.05835 |
| 1 | -4.05835 |
| 1 | -4.18739 |
| 0 | 4.07288  |
| 1 | -4.17607 |
| 0 | 5.40132  |
| 0 | 4.10193  |
| 1 | -3.92025 |
| 1 | -4.09333 |
| 1 | -4.10373 |
| 1 | -4.10373 |
| 0 | 4.04519  |
| 1 | -4.01741 |
| 0 | 3.99064  |
| 1 | -4.07157 |
| 0 | 3.89025  |
| 0 | 3.89508  |
| 1 | -3.88673 |
| 1 | -3.87841 |
| 0 | 3.90816  |
| 1 | -3.8792  |
| 1 | -4.12304 |
| 0 | 3.88525  |
| 1 | -4.0494  |
| 0 | 3.8661   |
| 0 | 4.31064  |
| 1 | -4.21628 |
| 0 | 4.13032  |
| 1 | -4.07938 |
| 0 | 5.48609  |
| 0 | 4.18558  |
| 0 | 4.09074  |
| 0 | 4.03371  |
| 1 | -4.11642 |
| 1 | -4.02972 |
| 0 | 3.91157  |
| 1 | -4.11611 |

|   |          |
|---|----------|
| 1 | -4.06711 |
| 0 | 3.88546  |
| 0 | 4.0544   |
| 0 | 3.87124  |
| 0 | 4.16744  |
| 1 | -4.00584 |
| 0 | 4.0122   |
| 1 | -4.09327 |
| 0 | 4.23812  |
| 1 | -3.92926 |
| 1 | -3.90857 |
| 1 | -4.18444 |
| 0 | 4.32696  |
| 1 | -3.92907 |
| 0 | 5.0409   |
| 0 | 4.00304  |
| 0 | 4.20188  |
| 1 | -4.02694 |
| 1 | -3.94756 |
| 0 | 4.03129  |
| 1 | -3.99182 |
| 1 | -4.00175 |
| 0 | 4.1509   |
| 0 | 5.08488  |
| 0 | 5.00027  |
| 0 | 5.15181  |
| 0 | 3.96934  |
| 0 | 4.30001  |
| 1 | -4.08743 |
| 0 | 4.18736  |
| 0 | 4.0105   |
| 0 | 4.19026  |
| 1 | -4.1831  |
| 1 | -4.00742 |
| 1 | -3.96909 |
| 1 | -3.93406 |
| 0 | 4.46541  |
| 0 | 3.99296  |
| 1 | -4.11871 |
| 1 | -4.14083 |
| 1 | -3.97443 |
| 1 | -3.97443 |
| 1 | -4.00678 |
| 0 | 3.97839  |
| 1 | -3.95081 |
| 0 | 3.97781  |
| 1 | -4.15185 |

|   |          |
|---|----------|
| 1 | -4.0008  |
| 0 | 4.06776  |
| 1 | -3.97199 |
| 0 | 4.05747  |
| 0 | 4.05747  |
| 1 | -3.88091 |
| 0 | 4.19522  |
| 1 | -4.12734 |
| 1 | -4.02232 |
| 1 | -4.05536 |
| 1 | -4.17412 |
| 1 | -3.89498 |
| 1 | -4.10246 |
| 0 | 4.2201   |
| 1 | -4.10945 |
| 1 | -3.88455 |
| 0 | 4.06425  |
| 1 | -3.91989 |
| 1 | -3.94541 |
| 0 | 4.17774  |
| 1 | -4.12564 |
| 1 | -3.9425  |
| 1 | -4.17078 |
| 0 | 4.19651  |
| 1 | -4.06583 |
| 1 | -4.19816 |
| 1 | -4.04634 |
| 1 | -3.88428 |
| 1 | -4.08497 |
| 1 | -4.03573 |
| 0 | 4.45048  |
| 0 | 4.05337  |
| 0 | 3.93299  |
| 0 | 5.06731  |
| 0 | 4.07974  |
| 1 | -4.02056 |
| 1 | -4.02056 |
| 1 | -3.90096 |
| 1 | -4.06587 |
| 1 | -4.02421 |
| 0 | 5.21571  |
| 1 | -4.12457 |
| 1 | -3.91025 |
| 1 | -4.03329 |
| 1 | -4.09505 |
| 0 | 4.1304   |
| 1 | -4.13005 |

|   |          |
|---|----------|
| 0 | 4.14025  |
| 1 | -3.9593  |
| 1 | -4.04044 |
| 0 | 5.05229  |
| 1 | -4.1831  |
| 1 | -4.1831  |
| 1 | -4.02811 |
| 1 | -4.05723 |
| 0 | 5.28682  |
| 1 | -4.03208 |
| 1 | -4.13679 |
| 1 | -3.90909 |
| 0 | 4.24474  |
| 0 | 4.08492  |
| 0 | 4.08492  |
| 0 | 4.35653  |
| 0 | 4.05771  |
| 1 | -4.04706 |
| 0 | 4.20153  |
| 1 | -4.1196  |
| 1 | -3.88951 |
| 0 | 5.14616  |
| 0 | 5.14616  |
| 1 | -3.90135 |
| 0 | 3.93817  |
| 0 | 3.91541  |
| 0 | 4.11187  |
| 1 | -4.18744 |
| 1 | -4.06236 |
| 1 | -4.04807 |
| 0 | 3.90041  |
| 1 | -3.91212 |
| 0 | 4.35453  |
| 0 | 4.35453  |
| 0 | 3.96672  |
| 0 | 3.96672  |
| 0 | 4.06719  |
| 1 | -4.01296 |
| 0 | 4.02333  |
| 0 | 4.19754  |
| 0 | 5.14415  |
| 1 | -4.05869 |
| 1 | -4.19798 |
| 1 | -4.13502 |
| 1 | -3.9659  |
| 0 | 4.04861  |
| 0 | 4.04861  |

|   |          |
|---|----------|
| 1 | -3.93578 |
| 1 | -4.09866 |
| 0 | 5.12865  |
| 1 | -4.13342 |
| 1 | -4.19893 |
| 1 | -3.8815  |
| 0 | 4.20098  |
| 1 | -4.09334 |
| 0 | 4.18182  |
| 1 | -4.15972 |
| 1 | -4.03261 |
| 1 | -3.95281 |
| 1 | -3.96114 |
| 1 | -4.0521  |
| 1 | -4.00186 |
| 1 | -3.97263 |
| 0 | 4.06746  |
| 1 | -4.15815 |
| 0 | 4.11969  |
| 0 | 4.02806  |
| 1 | -4.03216 |
| 1 | -4.16768 |
| 1 | -4.15341 |
| 0 | 4.04583  |
| 0 | 4.04583  |
| 1 | -4.10671 |
| 1 | -3.96321 |
| 0 | 5.14597  |
| 0 | 4.12616  |
| 0 | 4.20755  |
| 1 | -4.04654 |
| 0 | 4.00599  |
| 0 | 4.10019  |
| 1 | -3.92649 |
| 0 | 4.07583  |
| 0 | 4.07424  |
| 0 | 3.91984  |
| 1 | -4.15118 |
| 0 | 4.17028  |
| 1 | -4.06237 |
| 1 | -3.88849 |
| 0 | 4.26012  |
| 0 | 4.13765  |
| 1 | -4.13285 |
| 0 | 4.19132  |
| 1 | -4.07262 |
| 0 | 4.02948  |

|   |          |
|---|----------|
| 0 | 4.26471  |
| 0 | 5.28284  |
| 0 | 4.54553  |
| 0 | 4.03861  |
| 0 | 4.24672  |
| 0 | 4.24672  |
| 1 | -3.99264 |
| 1 | -3.94935 |
| 0 | 3.9155   |
| 1 | -4.12196 |
| 1 | -3.92249 |
| 0 | 4.26185  |
| 0 | 4.08736  |
| 0 | 4.1214   |
| 0 | 4.27695  |
| 0 | 5.05573  |
| 0 | 4.99305  |
| 1 | -4.12352 |
| 0 | 4.0123   |
| 0 | 4.0123   |
| 1 | -3.93067 |
| 1 | -4.1561  |
| 1 | -4.01453 |
| 0 | 3.89182  |
| 1 | -4.02803 |
| 1 | -4.03379 |
| 1 | -4.07021 |
| 0 | 3.95414  |
| 1 | -3.94686 |
| 1 | -3.87847 |
| 0 | 4.02467  |
| 0 | 4.30418  |
| 0 | 4.30399  |
| 1 | -3.87839 |
| 0 | 4.01756  |
| 0 | 4.17563  |
| 0 | 5.03838  |
| 1 | -4.14853 |
| 0 | 4.44897  |
| 0 | 4.10836  |
| 1 | -4.05161 |
| 1 | -4.05161 |
| 1 | -4.0889  |
| 1 | -3.94434 |
| 0 | 3.89196  |
| 0 | 4.27208  |
| 1 | -4.00826 |



|   |          |
|---|----------|
| 0 | 4.71168  |
| 0 | 3.87644  |
| 1 | -4.11449 |
| 0 | 4.02801  |
| 0 | 4.02801  |
| 1 | -4.03172 |
| 0 | 5.2725   |
| 0 | 3.9101   |
| 0 | 5.01182  |
| 0 | 4.14195  |
| 0 | 5.18312  |
| 1 | -4.07232 |
| 0 | 4.05142  |
| 0 | 4.05142  |
| 0 | 4.08071  |
| 0 | 3.95561  |
| 0 | 4.00536  |
| 0 | 4.3306   |
| 1 | -4.19486 |
| 1 | -4.19486 |
| 1 | -4.09624 |
| 0 | 5.24905  |
| 0 | 3.9717   |
| 0 | 4.79371  |
| 1 | -3.99231 |
| 1 | -4.1361  |
| 1 | -4.09566 |
| 1 | -3.9738  |
| 1 | -4.01823 |
| 1 | -4.04031 |
| 1 | -3.88934 |
| 1 | -4.00478 |
| 1 | -4.10388 |
| 1 | -4.01523 |
| 1 | -4.15143 |
| 1 | -4.15143 |
| 0 | 4.29153  |
| 1 | -4.0544  |
| 1 | -4.04931 |
| 1 | -4.04931 |
| 0 | 3.93439  |
| 0 | 5.23815  |
| 0 | 4.0784   |
| 0 | 4.47456  |
| 0 | 3.93579  |
| 1 | -4.15755 |
| 0 | 4.09764  |

|   |          |
|---|----------|
| 1 | -3.93355 |
| 0 | 5.09184  |
| 0 | 5.02971  |
| 0 | 4.19648  |
| 0 | 4.00971  |
| 0 | 3.98654  |
| 1 | -4.00012 |
| 0 | 5.12552  |
| 1 | -4.01766 |
| 0 | 4.07262  |
| 0 | 5.00199  |
| 0 | 3.95011  |
| 0 | 4.15113  |
| 0 | 4.5201   |
| 1 | -4.08866 |
| 1 | -4.08866 |
| 1 | -3.94776 |
| 1 | -3.95473 |
| 0 | 4.12916  |
| 0 | 4.16626  |
| 1 | -3.90883 |
| 1 | -4.17249 |
| 0 | 4.01157  |
| 1 | -3.95372 |
| 1 | -4.10781 |
| 0 | 5.13912  |
| 0 | 4.25139  |
| 1 | -3.91464 |
| 1 | -4.01767 |
| 1 | -4.08596 |
| 1 | -4.07269 |
| 1 | -3.95223 |
| 0 | 4.01899  |
| 1 | -4.04958 |
| 0 | 3.92369  |
| 0 | 3.92369  |
| 0 | 4.28091  |
| 0 | 4.06233  |
| 0 | 4.00821  |
| 0 | 5.32668  |
| 0 | 4.36913  |
| 0 | 4.34815  |
| 0 | 4.0367   |
| 0 | 4.11798  |
| 0 | 5.09145  |
| 0 | 4.21406  |
| 0 | 4.17577  |

|   |          |
|---|----------|
| 0 | 4.12277  |
| 1 | -4.01698 |
| 0 | 4.06123  |
| 0 | 3.99761  |
| 0 | 4.08913  |
| 0 | 5.31051  |
| 1 | -4.08013 |
| 1 | -4.08013 |
| 0 | 4.08804  |
| 1 | -4.00437 |
| 1 | -4.16052 |
| 1 | -4.16052 |
| 0 | 4.70346  |
| 0 | 4.06512  |
| 0 | 5.04499  |
| 1 | -3.87956 |
| 1 | -4.01632 |
| 1 | -3.93049 |
| 1 | -3.89223 |
| 1 | -3.95814 |
| 1 | -4.00962 |
| 1 | -4.07834 |
| 0 | 4.4029   |
| 1 | -3.96466 |
| 1 | -4.02766 |
| 1 | -4.16755 |
| 1 | -4.17872 |
| 0 | 4.16334  |
| 0 | 4.66772  |
| 1 | -4.04933 |
| 0 | 4.30573  |
| 0 | 4.01238  |
| 1 | -3.97231 |
| 0 | 4.0251   |
| 0 | 3.99953  |
| 0 | 3.87602  |
| 1 | -3.88084 |
| 1 | -3.99986 |
| 1 | -4.19329 |
| 1 | -3.95987 |
| 0 | 4.18726  |
| 0 | 4.04011  |
| 0 | 4.39264  |
| 1 | -3.92834 |
| 1 | -4.18638 |
| 0 | 4.26446  |
| 0 | 5.01853  |

|   |          |
|---|----------|
| 0 | 4.01862  |
| 1 | -3.89351 |
| 0 | 4.08386  |
| 1 | -4.06026 |
| 0 | 4.23879  |
| 1 | -4.1303  |
| 1 | -4.07944 |
| 1 | -4.17006 |
| 0 | 4.36408  |
| 1 | -4.05711 |
| 1 | -4.05493 |
| 0 | 3.9178   |
| 0 | 5.2756   |
| 1 | -3.98106 |
| 0 | 3.99295  |
| 0 | 4.35703  |
| 1 | -4.17088 |
| 0 | 4.31142  |
| 0 | 4.03171  |
| 0 | 4.03171  |
| 0 | 4.23143  |
| 0 | 4.5176   |
| 0 | 4.66602  |
| 1 | -4.01767 |
| 1 | -4.16271 |
| 1 | -4.15674 |
| 0 | 4.14953  |
| 0 | 4.09559  |
| 1 | -3.95327 |
| 1 | -3.91386 |
| 1 | -3.91124 |
| 0 | 3.99423  |
| 0 | 4.21797  |
| 0 | 3.95212  |
| 0 | 5.38346  |
| 0 | 3.88505  |
| 0 | 4.05618  |
| 1 | -4.19457 |
| 0 | 4.36308  |
| 1 | -3.97477 |
| 1 | -4.06936 |
| 1 | -4.12087 |
| 0 | 4.06588  |
| 1 | -3.99885 |
| 0 | 4.38122  |
| 0 | 4.23094  |
| 0 | 3.88598  |

|   |          |
|---|----------|
| 1 | -4.00957 |
| 0 | 4.14013  |
| 0 | 4.00367  |
| 0 | 4.01691  |
| 0 | 4.04221  |
| 0 | 4.25546  |
| 0 | 3.99997  |
| 0 | 4.35067  |
| 0 | 3.96116  |
| 0 | 4.53861  |
| 0 | 5.05168  |
| 0 | 4.20415  |
| 0 | 5.08473  |
| 1 | -3.99305 |
| 1 | -3.99305 |
| 1 | -4.20113 |
| 1 | -4.20113 |
| 1 | -4.01331 |
| 1 | -4.05802 |
| 1 | -4.12698 |
| 1 | -3.93163 |
| 1 | -4.17813 |
| 1 | -4.12431 |
| 0 | 4.14371  |
| 1 | -4.06427 |
| 1 | -4.03231 |
| 1 | -3.93591 |
| 0 | 4.22687  |
| 0 | 4.15046  |
| 0 | 5.38655  |
| 0 | 4.337    |
| 0 | 4.13153  |
| 0 | 4.14045  |
| 0 | 4.14045  |
| 0 | 4.7409   |
| 0 | 4.01501  |
| 0 | 5.27594  |
| 0 | 4.6738   |
| 1 | -4.00814 |
| 1 | -4.10976 |
| 1 | -4.03167 |
| 0 | 5.51357  |
| 0 | 4.19081  |
| 0 | 4.00464  |
| 0 | 3.90737  |
| 0 | 4.34308  |
| 1 | -4.18598 |

|   |          |
|---|----------|
| 0 | 3.88407  |
| 0 | 3.89598  |
| 0 | 3.89598  |
| 0 | 4.02709  |
| 0 | 4.02709  |
| 0 | 5.48782  |
| 0 | 5.48782  |
| 0 | 3.89473  |
| 0 | 3.89473  |
| 0 | 5.01443  |
| 1 | -4.055   |
| 0 | 3.8752   |
| 0 | 4.5633   |
| 0 | 4.33751  |
| 1 | -4.20099 |
| 1 | -4.21489 |
| 1 | -4.08315 |
| 0 | 3.91425  |
| 1 | -4.16561 |
| 0 | 4.16516  |
| 0 | 4.1832   |
| 0 | 4.55461  |
| 0 | 4.11968  |
| 0 | 4.41612  |
| 0 | 4.13122  |
| 0 | 3.92447  |
| 0 | 3.92949  |
| 0 | 4.51629  |
| 0 | 4.51629  |
| 1 | -4.15014 |
| 0 | 4.59394  |
| 0 | 4.06405  |
| 1 | -4.11952 |
| 0 | 4.36134  |
| 0 | 4.10046  |
| 0 | 4.20385  |
| 0 | 5.21239  |
| 1 | -3.92327 |
| 0 | 4.15746  |
| 0 | 4.15746  |
| 0 | 4.09804  |
| 0 | 4.012    |
| 0 | 4.53197  |
| 0 | 4.11627  |
| 0 | 4.03503  |
| 0 | 4.23077  |
| 1 | -4.00927 |

|   |          |
|---|----------|
| 1 | -4.06883 |
| 0 | 3.9386   |
| 1 | -4.09915 |
| 0 | 3.87099  |
| 0 | 3.88523  |
| 1 | -4.02745 |
| 1 | -3.89    |
| 1 | -4.07126 |
| 1 | -4.10909 |
| 0 | 4.00078  |
| 1 | -4.114   |
| 1 | -3.99532 |
| 0 | 3.91982  |
| 0 | 4.15843  |
| 1 | -4.04921 |
| 1 | -4.02612 |
| 1 | -4.02856 |
| 0 | 4.99272  |
| 1 | -4.07022 |
| 1 | -3.96185 |
| 1 | -3.96185 |
| 1 | -4.13135 |
| 0 | 3.88419  |
| 1 | -4.06447 |
| 0 | 3.99224  |
| 0 | 4.0851   |
| 1 | -3.89675 |
| 0 | 4.33275  |
| 0 | 4.15192  |
| 1 | -4.16294 |
| 0 | 4.10004  |
| 1 | -4.2012  |
| 1 | -4.0387  |
| 0 | 4.08551  |
| 0 | 4.13155  |
| 1 | -4.08932 |
| 1 | -3.97334 |
| 0 | 5.02063  |
| 1 | -3.95451 |
| 1 | -3.95451 |
| 1 | -4.18249 |
| 0 | 5.46783  |
| 0 | 5.02564  |
| 1 | -3.99733 |
| 0 | 4.22451  |
| 0 | 5.10267  |
| 0 | 4.03925  |

|   |          |
|---|----------|
| 0 | 4.07645  |
| 1 | -3.91776 |
| 1 | -3.91343 |
| 1 | -4.02075 |
| 0 | 4.33918  |
| 1 | -4.05622 |
| 0 | 4.01394  |
| 1 | -4.10223 |
| 0 | 4.04853  |
| 0 | 4.04853  |
| 0 | 4.18536  |
| 0 | 3.95972  |
| 0 | 4.79433  |
| 0 | 4.2123   |
| 0 | 4.44995  |
| 0 | 4.03612  |
| 1 | -4.14006 |
| 1 | -4.14006 |
| 0 | 5.51921  |
| 0 | 5.51921  |
| 1 | -4.20815 |
| 0 | 4.12027  |
| 1 | -3.99123 |
| 1 | -3.99123 |
| 0 | 4.18863  |
| 1 | -4.21306 |
| 0 | 4.28581  |
| 1 | -4.00291 |
| 0 | 4.19599  |
| 1 | -4.04689 |
| 0 | 5.13825  |
| 0 | 4.14447  |
| 0 | 4.14447  |
| 1 | -3.89704 |
| 1 | -3.99536 |
| 1 | -3.9789  |
| 1 | -3.90056 |
| 0 | 4.25507  |
| 0 | 4.84505  |
| 0 | 5.34422  |
| 0 | 3.873    |
| 0 | 5.10903  |
| 0 | 4.30432  |
| 1 | -4.01347 |
| 0 | 4.20158  |
| 0 | 4.00943  |
| 0 | 3.96474  |



|   |          |
|---|----------|
| 1 | -3.90708 |
| 1 | -3.89729 |
| 0 | 4.16398  |
| 0 | 4.48669  |
| 0 | 3.93103  |
| 1 | -4.20097 |
| 1 | -4.0479  |
| 0 | 3.89558  |
| 1 | -4.1036  |
| 1 | -4.07649 |
| 1 | -4.08754 |
| 1 | -4.10133 |
| 0 | 3.97091  |
| 1 | -4.09236 |
| 0 | 3.88327  |
| 0 | 4.00732  |
| 0 | 4.30143  |
| 1 | -4.15485 |
| 1 | -4.10377 |
| 1 | -4.01751 |
| 1 | -3.95924 |
| 1 | -4.10525 |
| 0 | 4.17452  |
| 0 | 5.45792  |
| 0 | 4.12868  |
| 0 | 4.04515  |
| 0 | 4.08724  |
| 0 | 4.16674  |
| 0 | 4.25454  |
| 1 | -3.89717 |
| 1 | -4.0945  |
| 1 | -4.00585 |
| 0 | 3.92181  |
| 0 | 3.90914  |
| 0 | 4.01771  |
| 0 | 5.50479  |
| 0 | 4.15699  |
| 1 | -4.11892 |
| 1 | -4.11892 |
| 0 | 4.22177  |
| 0 | 4.16042  |
| 0 | 4.14683  |
| 1 | -3.97518 |
| 0 | 5.38553  |
| 0 | 4.1393   |
| 0 | 4.02201  |
| 0 | 4.36865  |

|   |          |
|---|----------|
| 0 | 3.99656  |
| 0 | 3.90651  |
| 1 | -3.93397 |
| 0 | 4.52037  |
| 0 | 4.05206  |
| 1 | -4.17585 |
| 0 | 4.19492  |
| 0 | 3.90894  |
| 0 | 3.90894  |
| 0 | 4.1399   |
| 0 | 4.49423  |
| 0 | 4.49423  |
| 0 | 4.05512  |
| 0 | 4.05512  |
| 1 | -4.16263 |
| 0 | 4.23059  |
| 0 | 4.01291  |
| 0 | 4.03965  |
| 0 | 4.01253  |
| 0 | 3.91502  |
| 0 | 4.39721  |
| 0 | 4.21038  |
| 0 | 5.0102   |
| 0 | 4.01565  |
| 1 | -3.89224 |
| 0 | 4.64956  |
| 0 | 4.0593   |
| 0 | 4.11841  |
| 0 | 4.09145  |
| 1 | -4.07706 |
| 1 | -3.9372  |
| 0 | 5.5565   |
| 1 | -3.98845 |
| 0 | 4.7641   |
| 1 | -4.13269 |
| 1 | -4.16648 |
| 1 | -4.16648 |
| 0 | 3.89267  |
| 0 | 4.0101   |
| 0 | 3.88591  |
| 0 | 4.04251  |
| 0 | 3.97301  |
| 0 | 5.08361  |
| 1 | -4.03364 |
| 1 | -3.99893 |
| 1 | -4.06502 |
| 0 | 4.0021   |

|   |          |
|---|----------|
| 0 | 4.22133  |
| 0 | 4.08951  |
| 0 | 3.87623  |
| 0 | 5.39963  |
| 1 | -4.09152 |
| 1 | -3.98222 |
| 0 | 3.87626  |
| 1 | -4.00263 |
| 0 | 4.15941  |
| 0 | 4.15941  |
| 0 | 4.01592  |
| 1 | -4.05902 |
| 0 | 5.1509   |
| 1 | -4.07528 |
| 0 | 5.07842  |
| 0 | 3.91236  |
| 1 | -4.14816 |
| 0 | 4.36402  |
| 1 | -4.11229 |
| 1 | -3.88298 |
| 1 | -4.02459 |
| 1 | -3.93529 |
| 1 | -4.09877 |
| 1 | -4.01336 |
| 0 | 4.10365  |
| 1 | -4.068   |
| 1 | -3.97019 |
| 1 | -4.02507 |
| 1 | -3.95259 |
| 0 | 5.02881  |
| 1 | -3.91201 |
| 0 | 4.22481  |
| 1 | -4.11989 |
| 1 | -4.09959 |
| 1 | -3.90372 |
| 1 | -4.03412 |
| 1 | -4.14844 |
| 1 | -3.93252 |
| 1 | -4.02081 |
| 1 | -3.97779 |
| 1 | -3.97779 |
| 0 | 3.91831  |
| 0 | 3.94975  |
| 1 | -4.11352 |
| 0 | 4.43415  |
| 0 | 4.64697  |
| 0 | 3.90065  |

|   |          |
|---|----------|
| 1 | -3.87786 |
| 1 | -3.87786 |
| 1 | -4.07272 |
| 1 | -4.12277 |
| 1 | -4.12277 |
| 1 | -4.09772 |
| 1 | -4.04093 |
| 1 | -3.9921  |
| 0 | 5.29494  |
| 0 | 3.98823  |
| 0 | 3.8685   |
| 1 | -4.20112 |
| 1 | -4.13411 |
| 1 | -4.13411 |
| 0 | 3.88017  |
| 1 | -4.13453 |
| 1 | -3.96512 |
| 0 | 5.08037  |
| 0 | 4.03285  |
| 0 | 4.5865   |
| 0 | 4.03709  |
| 0 | 4.3821   |
| 0 | 3.87249  |
| 1 | -3.91904 |
| 0 | 4.49524  |
| 0 | 4.01125  |
| 0 | 3.90603  |
| 0 | 3.90603  |
| 1 | -4.0787  |
| 0 | 5.57327  |
| 1 | -4.12685 |
| 1 | -4.02183 |
| 0 | 3.92585  |
| 0 | 4.04676  |
| 1 | -4.03331 |
| 1 | -4.06424 |
| 1 | -4.1788  |
| 0 | 4.07517  |
| 0 | 5.13598  |
| 1 | -4.05535 |
| 1 | -4.02766 |
| 1 | -4.1234  |
| 0 | 4.61817  |
| 0 | 4.0169   |
| 1 | -4.08164 |
| 0 | 3.88921  |
| 0 | 4.05328  |

|   |          |
|---|----------|
| 0 | 4.08849  |
| 0 | 5.11227  |
| 1 | -4.0864  |
| 0 | 3.91033  |
| 0 | 5.21949  |
| 1 | -3.88329 |
| 1 | -4.21013 |
| 0 | 4.61896  |
| 0 | 4.20781  |
| 1 | -4.06583 |
| 0 | 4.02745  |
| 0 | 3.99077  |
| 0 | 4.58071  |
| 0 | 4.01695  |
| 0 | 3.93525  |
| 0 | 3.91796  |
| 1 | -3.92294 |
| 1 | -4.10726 |
| 0 | 4.12203  |
| 1 | -4.05408 |
| 0 | 4.6297   |
| 0 | 4.6297   |
| 0 | 3.95315  |
| 0 | 4.44111  |
| 0 | 4.07813  |
| 1 | -4.1337  |
| 0 | 4.08571  |
| 1 | -3.89913 |
| 1 | -3.92944 |
| 1 | -4.00392 |
| 1 | -4.12039 |
| 1 | -4.07544 |
| 0 | 3.90897  |
| 0 | 3.87595  |
| 0 | 5.07778  |
| 1 | -4.026   |
| 1 | -4.15835 |
| 1 | -4.13076 |
| 1 | -4.11793 |
| 1 | -4.19516 |
| 1 | -4.05615 |
| 0 | 4.04372  |
| 0 | 3.92636  |
| 0 | 4.00322  |
| 0 | 4.00322  |
| 0 | 4.23737  |
| 1 | -4.05432 |

|   |          |
|---|----------|
| 1 | -4.19429 |
| 1 | -4.10029 |
| 0 | 4.31587  |
| 1 | -4.05471 |
| 0 | 5.22656  |
| 0 | 4.47896  |
| 0 | 4.17859  |
| 0 | 4.17859  |
| 1 | -4.18595 |
| 0 | 4.14918  |
| 1 | -4.11196 |
| 1 | -4.01479 |
| 1 | -4.01479 |
| 0 | 3.93687  |
| 0 | 3.93687  |
| 0 | 5.0698   |
| 0 | 4.35203  |
| 0 | 4.29906  |
| 1 | -4.09476 |
| 1 | -4.09476 |
| 1 | -4.19467 |
| 0 | 4.01607  |
| 0 | 4.31609  |
| 0 | 4.13202  |
| 1 | -4.19173 |
| 0 | 3.99338  |
| 1 | -4.03878 |
| 1 | -4.03878 |
| 0 | 5.28642  |
| 0 | 5.28642  |
| 0 | 4.47069  |
| 0 | 3.89166  |
| 0 | 4.01906  |
| 1 | -3.90811 |
| 1 | -4.02117 |
| 0 | 4.03691  |
| 1 | -3.9308  |
| 1 | -3.91823 |
| 1 | -3.97967 |
| 1 | -4.05148 |
| 1 | -4.05543 |
| 1 | -3.90864 |
| 0 | 5.29333  |
| 1 | -3.89378 |
| 1 | -4.20484 |
| 1 | -4.1454  |
| 1 | -3.95443 |

|   |          |
|---|----------|
| 0 | 4.21966  |
| 1 | -4.13305 |
| 1 | -3.96487 |
| 1 | -4.20547 |
| 0 | 3.91892  |
| 0 | 3.91892  |
| 1 | -3.90703 |
| 0 | 4.12823  |
| 0 | 4.10869  |
| 1 | -4.15082 |
| 0 | 3.91599  |
| 1 | -3.9525  |
| 0 | 4.29123  |
| 1 | -3.92118 |
| 0 | 3.96726  |
| 1 | -3.94955 |
| 0 | 4.14485  |
| 0 | 4.14485  |
| 0 | 4.32409  |
| 1 | -4.18583 |
| 1 | -4.18583 |
| 0 | 5.32123  |
| 0 | 4.70526  |
| 0 | 3.9565   |
| 0 | 4.30168  |
| 0 | 4.30168  |
| 0 | 4.17129  |
| 0 | 4.17129  |
| 0 | 5.4675   |
| 0 | 5.16573  |
| 0 | 3.97299  |
| 0 | 4.20818  |
| 1 | -3.88874 |
| 0 | 3.90311  |
| 0 | 4.31332  |
| 0 | 4.00976  |
| 1 | -4.11978 |
| 1 | -4.10162 |
| 1 | -4.13207 |
| 0 | 4.20001  |
| 1 | -3.92494 |
| 1 | -3.91693 |
| 0 | 4.11667  |
| 0 | 4.0403   |
| 0 | 4.08056  |
| 0 | 4.08056  |
| 0 | 4.14108  |

|   |          |
|---|----------|
| 0 | 4.14108  |
| 0 | 4.04194  |
| 0 | 4.04194  |
| 0 | 4.16495  |
| 0 | 4.40118  |
| 0 | 4.02661  |
| 0 | 4.00963  |
| 0 | 4.16949  |
| 0 | 3.91581  |
| 0 | 4.30099  |
| 0 | 3.95125  |
| 0 | 4.22939  |
| 0 | 4.22939  |
| 0 | 3.86953  |
| 0 | 4.22939  |
| 1 | -3.95394 |
| 1 | -4.03767 |
| 0 | 4.08954  |
| 0 | 4.03629  |
| 0 | 5.14959  |
| 0 | 4.3934   |
| 0 | 4.4995   |
| 0 | 4.14961  |
| 1 | -3.92689 |
| 0 | 4.1982   |
| 0 | 4.1982   |
| 0 | 5.19419  |
| 0 | 4.0366   |
| 0 | 4.0366   |
| 0 | 4.08383  |
| 0 | 4.25882  |
| 0 | 4.00086  |
| 0 | 4.27014  |
| 0 | 4.08842  |
| 0 | 4.08378  |
| 0 | 4.28742  |
| 0 | 4.01757  |
| 0 | 4.22417  |
| 0 | 4.16161  |
| 0 | 5.21205  |
| 0 | 5.11026  |
| 0 | 4.20071  |
| 0 | 5.09567  |
| 0 | 4.02448  |
| 0 | 5.36193  |
| 0 | 5.25464  |
| 0 | 5.16634  |



|   |          |
|---|----------|
| 0 | 3.9801   |
| 0 | 4.1513   |
| 0 | 4.10868  |
| 0 | 4.02798  |
| 0 | 4.10466  |
| 1 | -3.92266 |
| 0 | 4.28755  |
| 1 | -3.93131 |
| 0 | 4.1166   |
| 0 | 3.96039  |
| 0 | 3.96039  |
| 0 | 4.14043  |
| 0 | 4.14043  |
| 0 | 5.3227   |
| 0 | 5.23278  |
| 0 | 4.0978   |
| 0 | 4.2071   |
| 0 | 5.25701  |
| 1 | -3.94616 |
| 1 | -4.03479 |
| 0 | 4.01018  |
| 0 | 4.2786   |
| 0 | 4.00241  |
| 1 | -4.18069 |
| 0 | 4.10889  |
| 0 | 4.10889  |
| 1 | -4.17998 |
| 0 | 3.88581  |
| 0 | 4.00619  |
| 0 | 4.00619  |
| 0 | 4.03354  |
| 1 | -4.09077 |
| 1 | -4.09077 |
| 0 | 4.05914  |
| 0 | 4.19462  |
| 0 | 4.64577  |
| 0 | 3.89872  |
| 1 | -4.05872 |
| 0 | 4.25181  |
| 1 | -4.0276  |
| 1 | -4.18681 |
| 1 | -3.94153 |
| 1 | -4.03563 |
| 0 | 3.94126  |
| 0 | 4.06991  |
| 1 | -4.0161  |
| 0 | 4.00287  |

|   |          |
|---|----------|
| 0 | 4.09732  |
| 0 | 4.36641  |
| 1 | -3.95015 |
| 0 | 3.95764  |
| 0 | 5.19227  |
| 0 | 4.07483  |
| 0 | 4.36193  |
| 0 | 4.01364  |
| 0 | 4.08445  |
| 0 | 4.258    |
| 0 | 4.20056  |
| 1 | -4.08623 |
| 0 | 4.32745  |
| 0 | 4.26144  |
| 0 | 4.8484   |
| 1 | -4.05594 |
| 1 | -4.00192 |
| 0 | 4.00561  |
| 1 | -4.07124 |
| 1 | -4.1254  |
| 1 | -4.09468 |
| 0 | 5.54116  |
| 0 | 5.54116  |
| 1 | -4.02556 |
| 1 | -4.14469 |
| 0 | 4.22486  |
| 1 | -3.91638 |
| 1 | -4.15546 |
| 0 | 4.17969  |
| 0 | 4.50692  |
| 1 | -3.93028 |
| 1 | -3.936   |
| 0 | 4.07206  |
| 1 | -4.01165 |
| 1 | -4.11692 |
| 0 | 4.12236  |
| 0 | 4.26713  |
| 1 | -3.9643  |
| 0 | 4.19587  |
| 0 | 4.73916  |
| 1 | -3.95971 |
| 0 | 4.06535  |
| 1 | -4.12472 |
| 0 | 4.26486  |
| 1 | -4.20627 |
| 0 | 4.09601  |
| 1 | -4.09423 |

|   |          |
|---|----------|
| 0 | 4.45267  |
| 0 | 3.9778   |
| 0 | 4.49433  |
| 0 | 4.05774  |
| 1 | -3.91569 |
| 0 | 5.40134  |
| 0 | 5.33424  |
| 1 | -4.0534  |
| 0 | 4.02182  |
| 0 | 5.0853   |
| 0 | 5.17622  |
| 0 | 3.99296  |
| 0 | 4.02564  |
| 1 | -4.01751 |
| 0 | 3.89731  |
| 0 | 3.91478  |
| 1 | -4.16873 |
| 0 | 4.21646  |
| 0 | 3.90068  |
| 1 | -3.96602 |
| 1 | -3.88943 |
| 0 | 4.52534  |
| 1 | -3.89079 |
| 1 | -3.98211 |
| 1 | -4.19554 |
| 0 | 4.24232  |
| 1 | -3.91492 |
| 1 | -4.04692 |
| 1 | -4.00927 |
| 0 | 3.96432  |
| 0 | 4.57976  |
| 0 | 4.07444  |
| 1 | -3.90338 |
| 0 | 3.88274  |
| 1 | -3.88224 |
| 0 | 3.91848  |
| 0 | 4.12599  |
| 0 | 3.98991  |
| 0 | 4.01986  |
| 1 | -4.14721 |
| 0 | 4.30018  |
| 0 | 5.04507  |
| 0 | 3.90986  |
| 0 | 4.26983  |
| 1 | -4.06326 |
| 0 | 5.44816  |
| 0 | 3.87194  |

|   |          |
|---|----------|
| 0 | 4.57833  |
| 0 | 4.57833  |
| 0 | 5.24564  |
| 0 | 4.22252  |
| 1 | -4.20197 |
| 0 | 4.37864  |
| 0 | 4.15503  |
| 1 | -4.00401 |
| 1 | -4.00168 |
| 0 | 5.01514  |
| 0 | 4.14678  |
| 1 | -4.06669 |
| 1 | -4.20257 |
| 0 | 4.06814  |
| 1 | -3.89479 |
| 1 | -3.95863 |
| 0 | 5.06503  |
| 0 | 4.45645  |
| 1 | -4.00456 |
| 1 | -4.0708  |
| 0 | 4.13872  |
| 0 | 4.13872  |
| 1 | -4.08174 |
| 1 | -3.93489 |
| 0 | 5.10782  |
| 1 | -4.19809 |
| 0 | 4.04957  |
| 0 | 4.01558  |
| 0 | 4.01424  |
| 1 | -4.19406 |
| 1 | -3.98397 |
| 0 | 4.04449  |
| 0 | 3.91928  |
| 0 | 4.14445  |
| 0 | 5.04797  |
| 1 | -4.20751 |
| 0 | 4.02599  |
| 0 | 4.09459  |
| 0 | 4.25193  |
| 1 | -4.19503 |
| 1 | -4.19347 |
| 1 | -4.08918 |
| 1 | -3.88507 |
| 1 | -4.21523 |
| 1 | -3.93353 |
| 1 | -4.0063  |
| 1 | -4.06638 |

|   |          |
|---|----------|
| 0 | 4.1219   |
| 1 | -4.01775 |
| 0 | 4.05175  |
| 0 | 4.43717  |
| 1 | -3.93079 |
| 1 | -4.09671 |
| 0 | 5.00916  |
| 0 | 4.72034  |
| 0 | 4.45958  |
| 1 | -3.92048 |
| 1 | -3.94012 |
| 1 | -3.93842 |
| 1 | -3.93993 |
| 0 | 4.03382  |
| 0 | 3.91572  |
| 0 | 4.27264  |
| 0 | 3.98494  |
| 0 | 4.00035  |
| 1 | -4.10508 |
| 0 | 3.88234  |
| 0 | 3.91542  |
| 0 | 3.9697   |
| 0 | 3.92881  |
| 1 | -4.21397 |
| 0 | 4.05224  |
| 1 | -4.18128 |
| 1 | -4.1027  |
| 0 | 4.43035  |
| 1 | -3.8795  |
| 1 | -4.09161 |
| 0 | 4.03666  |
| 1 | -3.90025 |
| 1 | -3.9861  |
| 0 | 4.01342  |
| 0 | 3.8865   |
| 0 | 3.8865   |
| 0 | 5.13884  |
| 0 | 3.93509  |
| 0 | 4.14293  |
| 1 | -4.06288 |
| 0 | 3.94424  |
| 1 | -4.13285 |
| 1 | -4.04776 |
| 0 | 4.2761   |
| 1 | -3.92759 |
| 1 | -4.03307 |
| 0 | 4.04952  |

|   |          |
|---|----------|
| 0 | 3.97798  |
| 1 | -4.21432 |
| 0 | 4.36741  |
| 1 | -4.15225 |
| 1 | -4.15774 |
| 1 | -4.07857 |
| 1 | -3.95158 |
| 0 | 4.08978  |
| 1 | -4.07771 |
| 1 | -4.07771 |
| 1 | -4.1959  |
| 0 | 4.44379  |
| 1 | -4.07866 |
| 0 | 5.21824  |
| 0 | 5.38947  |
| 1 | -4.21132 |
| 1 | -3.90553 |
| 1 | -4.11136 |
| 1 | -3.98185 |
| 0 | 4.51059  |
| 0 | 3.97694  |
| 0 | 4.00915  |
| 0 | 5.08584  |
| 1 | -4.20962 |
| 1 | -4.02066 |
| 0 | 4.1019   |
| 0 | 4.10178  |
| 0 | 4.34713  |
| 0 | 5.05201  |
| 0 | 4.27069  |
| 1 | -4.1624  |
| 1 | -4.07596 |
| 1 | -3.90166 |
| 0 | 4.26773  |
| 0 | 4.00319  |
| 0 | 5.2568   |
| 0 | 4.84902  |
| 0 | 4.90964  |
| 0 | 4.37315  |
| 0 | 3.98499  |
| 0 | 5.22859  |
| 0 | 4.06079  |
| 0 | 4.01452  |
| 0 | 4.44481  |
| 1 | -4.02765 |
| 0 | 4.29835  |
| 1 | -3.94749 |

|   |          |
|---|----------|
| 1 | -4.07363 |
| 0 | 4.23015  |
| 0 | 4.04192  |
| 1 | -3.89041 |
| 0 | 3.9556   |
| 1 | -4.05808 |
| 0 | 3.95805  |
| 0 | 3.95805  |
| 0 | 4.32318  |
| 1 | -3.97776 |
| 1 | -3.96839 |
| 0 | 3.96039  |
| 0 | 4.03031  |
| 0 | 4.03031  |
| 1 | -4.07685 |
| 0 | 3.87792  |
| 1 | -4.00864 |
| 1 | -4.10487 |
| 1 | -4.03705 |
| 0 | 4.15684  |
| 1 | -3.91845 |
| 1 | -4.0108  |
| 0 | 3.89497  |
| 1 | -4.14001 |
| 0 | 4.03687  |
| 1 | -4.07958 |
| 1 | -3.97515 |
| 1 | -3.97515 |
| 0 | 4.31208  |
| 0 | 3.86635  |
| 0 | 4.29744  |
| 1 | -3.96459 |
| 0 | 4.20856  |
| 0 | 5.35663  |
| 0 | 3.86695  |
| 0 | 3.90878  |
| 1 | -4.11618 |
| 0 | 4.16406  |
| 0 | 5.29569  |
| 0 | 4.08456  |
| 0 | 4.08456  |
| 1 | -3.95115 |
| 0 | 3.98864  |
| 1 | -4.20642 |
| 0 | 4.01129  |
| 0 | 4.19011  |
| 0 | 4.90054  |

|   |          |
|---|----------|
| 0 | 4.76442  |
| 0 | 5.45775  |
| 0 | 4.07271  |
| 0 | 3.88676  |
| 0 | 4.20779  |
| 0 | 4.07786  |
| 1 | -4.01795 |
| 1 | -3.99174 |
| 1 | -3.97702 |
| 1 | -3.89925 |
| 0 | 5.20367  |
| 1 | -3.88249 |
| 1 | -4.2013  |
| 1 | -4.10439 |
| 1 | -3.90479 |
| 1 | -4.05102 |
| 0 | 4.4337   |
| 0 | 4.01799  |
| 1 | -4.09775 |
| 0 | 4.05767  |
| 0 | 4.43231  |
| 0 | 4.33096  |
| 0 | 4.33096  |
| 0 | 4.89432  |
| 1 | -4.02634 |
| 0 | 4.30558  |
| 0 | 5.31312  |
| 0 | 4.03758  |
| 0 | 5.27263  |
| 1 | -4.18106 |
| 1 | -3.95844 |
| 1 | -4.09926 |
| 1 | -4.09926 |
| 0 | 4.16921  |
| 1 | -4.08277 |
| 0 | 4.1482   |
| 0 | 5.32659  |
| 0 | 4.16181  |
| 0 | 4.28203  |
| 0 | 3.86907  |
| 0 | 5.45267  |
| 0 | 5.18765  |
| 0 | 4.3109   |
| 1 | -3.96895 |
| 0 | 4.09877  |
| 0 | 4.03375  |
| 1 | -4.06967 |



|   |          |
|---|----------|
| 1 | -4.00456 |
| 1 | -4.21618 |
| 0 | 3.8917   |
| 1 | -4.16208 |
| 0 | 4.03558  |
| 0 | 4.56137  |
| 0 | 4.04724  |
| 1 | -4.0745  |
| 0 | 4.42145  |
| 0 | 4.18147  |
| 0 | 4.04529  |
| 1 | -4.21252 |
| 1 | -3.91601 |
| 0 | 4.08959  |
| 0 | 4.18408  |
| 0 | 4.27383  |
| 1 | -3.95734 |
| 1 | -4.04961 |
| 0 | 4.07376  |
| 0 | 4.37767  |
| 0 | 5.0993   |
| 0 | 4.203    |
| 0 | 4.07806  |
| 0 | 4.05554  |
| 1 | -3.95582 |
| 1 | -3.95582 |
| 1 | -3.95189 |
| 1 | -3.90499 |
| 1 | -4.08938 |
| 1 | -3.90833 |
| 0 | 4.23206  |
| 0 | 4.23206  |
| 0 | 5.06259  |
| 0 | 3.88166  |
| 1 | -3.88239 |
| 0 | 3.95231  |
| 0 | 4.38692  |
| 1 | -3.95544 |
| 0 | 4.21637  |
| 0 | 4.21637  |
| 0 | 4.02989  |
| 0 | 4.10711  |
| 0 | 4.36649  |
| 0 | 4.14171  |
| 0 | 4.14171  |
| 1 | -3.944   |
| 1 | -4.00285 |

|   |          |
|---|----------|
| 0 | 4.00242  |
| 0 | 4.13823  |
| 0 | 4.1644   |
| 0 | 4.02525  |
| 1 | -4.09615 |
| 0 | 3.87545  |
| 0 | 4.08598  |
| 0 | 4.50757  |
| 0 | 4.54026  |
| 0 | 4.54026  |
| 0 | 5.08199  |
| 0 | 5.08199  |
| 0 | 4.49325  |
| 0 | 4.49325  |
| 0 | 5.50478  |
| 0 | 3.91497  |
| 1 | -4.01003 |
| 0 | 4.25077  |
| 1 | -3.89075 |
| 0 | 3.87943  |
| 1 | -4.05382 |
| 1 | -4.10635 |
| 0 | 4.72991  |
| 0 | 5.59839  |
| 1 | -3.92719 |
| 1 | -4.08434 |
| 1 | -4.00284 |
| 0 | 4.01592  |
| 1 | -4.01904 |
| 1 | -4.01904 |
| 1 | -3.95151 |
| 1 | -3.95151 |
| 1 | -3.96259 |
| 1 | -4.02483 |
| 0 | 4.04179  |
| 0 | 3.98226  |
| 0 | 3.8702   |
| 0 | 4.02912  |
| 1 | -4.0333  |
| 1 | -4.12795 |
| 1 | -3.91871 |
| 0 | 5.26139  |
| 1 | -4.16821 |
| 0 | 3.88506  |
| 0 | 5.00407  |
| 1 | -4.0443  |
| 1 | -4.03629 |

|   |          |
|---|----------|
| 0 | 4.54365  |
| 0 | 3.92774  |
| 1 | -4.20142 |
| 0 | 4.10723  |
| 0 | 4.11466  |
| 1 | -4.01919 |
| 0 | 3.9175   |
| 1 | -4.13351 |
| 1 | -4.11265 |
| 1 | -4.13265 |
| 0 | 4.50149  |
| 0 | 4.55524  |
| 1 | -4.0132  |
| 1 | -4.05936 |
| 1 | -3.93239 |
| 0 | 5.16204  |
| 1 | -4.04965 |
| 0 | 4.06769  |
| 1 | -4.19831 |
| 0 | 4.07176  |
| 1 | -4.0283  |
| 0 | 4.11126  |
| 0 | 4.21961  |
| 0 | 3.90687  |
| 0 | 3.90687  |
| 0 | 4.43058  |
| 0 | 4.30653  |
| 0 | 4.10957  |
| 0 | 3.86983  |
| 1 | -3.9062  |
| 0 | 4.30246  |
| 0 | 3.8981   |
| 1 | -4.21358 |
| 1 | -4.01104 |
| 0 | 4.03302  |
| 0 | 4.65529  |
| 0 | 4.86184  |
| 1 | -4.02341 |
| 0 | 4.1111   |
| 1 | -4.04172 |
| 1 | -4.04172 |
| 1 | -4.11596 |
| 1 | -4.11596 |
| 1 | -4.05764 |
| 1 | -3.98515 |
| 1 | -4.15173 |
| 0 | 4.01512  |

|   |          |
|---|----------|
| 0 | 3.88245  |
| 1 | -4.20656 |
| 1 | -4.1661  |
| 1 | -4.0779  |
| 1 | -3.97341 |
| 0 | 4.00687  |
| 0 | 5.00258  |
| 0 | 4.36185  |
| 0 | 4.02534  |
| 0 | 4.31847  |
| 0 | 4.5503   |
| 0 | 4.5503   |
| 0 | 4.33828  |
| 0 | 4.21675  |
| 0 | 3.93996  |
| 0 | 3.8817   |
| 0 | 4.22341  |
| 0 | 4.1403   |
| 0 | 4.22131  |
| 0 | 4.19394  |
| 1 | -4.18212 |
| 1 | -4.12323 |
| 0 | 5.17749  |
| 1 | -4.09837 |
| 1 | -3.89223 |
| 1 | -4.00342 |
| 0 | 4.0041   |
| 0 | 4.01467  |
| 0 | 5.25848  |
| 0 | 4.20365  |
| 0 | 4.00214  |
| 0 | 4.20208  |
| 0 | 5.33775  |
| 0 | 3.87669  |
| 0 | 5.10575  |
| 0 | 4.28442  |
| 0 | 5.08584  |
| 0 | 3.9033   |
| 0 | 4.27089  |
| 0 | 4.39995  |
| 0 | 4.27678  |
| 0 | 4.04981  |
| 0 | 4.33403  |
| 0 | 4.45756  |
| 0 | 4.27164  |
| 1 | -3.87843 |
| 1 | -3.88564 |

|   |          |
|---|----------|
| 0 | 5.10914  |
| 0 | 4.38652  |
| 0 | 4.56691  |
| 1 | -3.99266 |
| 1 | -4.1368  |
| 0 | 4.11367  |
| 0 | 4.10109  |
| 0 | 5.01303  |
| 0 | 4.13743  |
| 1 | -3.92137 |
| 0 | 4.22137  |
| 0 | 3.92924  |
| 0 | 5.05639  |
| 0 | 4.37525  |
| 0 | 5.16203  |
| 0 | 4.08947  |
| 0 | 3.92478  |
| 0 | 3.87029  |
| 1 | -4.01231 |
| 0 | 5.39472  |
| 0 | 4.00423  |
| 0 | 4.20394  |
| 1 | -4.05077 |
| 1 | -4.12245 |
| 1 | -4.00154 |
| 1 | -3.95619 |
| 1 | -3.95955 |
| 0 | 4.24811  |
| 0 | 4.24811  |
| 0 | 4.05055  |
| 0 | 4.20605  |
| 0 | 4.18074  |
| 0 | 5.00677  |
| 0 | 5.19636  |
| 0 | 3.99817  |
| 0 | 4.3552   |
| 1 | -4.06066 |
| 0 | 4.18945  |
| 1 | -3.99956 |
| 0 | 4.13984  |
| 1 | -4.02801 |
| 0 | 4.24668  |
| 0 | 4.24668  |
| 1 | -3.99104 |
| 1 | -4.00507 |
| 1 | -4.06727 |
| 1 | -4.02704 |

|   |          |
|---|----------|
| 1 | -4.12274 |
| 1 | -4.20726 |
| 1 | -4.21725 |
| 1 | -4.02387 |
| 0 | 5.22354  |
| 0 | 4.04479  |
| 0 | 4.27311  |
| 1 | -4.04179 |
| 0 | 4.20837  |
| 1 | -3.89745 |
| 1 | -4.13432 |
| 1 | -3.88109 |
| 1 | -3.88109 |
| 1 | -4.19232 |
| 0 | 4.26692  |
| 0 | 4.04693  |
| 1 | -4.18626 |
| 1 | -4.00553 |
| 0 | 4.71663  |
| 0 | 4.79777  |
| 0 | 4.25779  |
| 0 | 4.33203  |
| 0 | 4.11511  |
| 1 | -3.92514 |
| 0 | 3.97308  |
| 0 | 3.90652  |
| 0 | 4.45798  |
| 1 | -4.21924 |
| 1 | -4.10312 |
| 1 | -4.08757 |
| 0 | 4.09207  |
| 0 | 4.06971  |
| 0 | 4.06012  |
| 0 | 3.97837  |
| 1 | -4.17405 |
| 1 | -4.10641 |
| 1 | -4.10641 |
| 0 | 4.003    |
| 0 | 4.28949  |
| 0 | 4.04576  |
| 0 | 4.04916  |
| 1 | -4.02523 |
| 1 | -4.05401 |
| 0 | 3.90704  |
| 0 | 3.90704  |
| 1 | -4.19967 |
| 1 | -4.05076 |

|   |          |
|---|----------|
| 0 | 3.92254  |
| 0 | 4.08238  |
| 0 | 5.06927  |
| 1 | -4.05935 |
| 0 | 4.20817  |
| 1 | -4.0337  |
| 0 | 3.91872  |
| 0 | 4.08065  |
| 0 | 3.98789  |
| 0 | 5.1287   |
| 0 | 5.45067  |
| 0 | 4.28241  |
| 1 | -4.10303 |
| 0 | 3.86859  |
| 0 | 5.18799  |
| 0 | 4.09981  |
| 0 | 4.38614  |
| 0 | 4.0584   |
| 0 | 4.75064  |
| 0 | 4.18265  |
| 0 | 4.20947  |
| 0 | 5.16115  |
| 0 | 5.16115  |
| 1 | -4.13138 |
| 1 | -4.13138 |
| 0 | 5.31569  |
| 0 | 4.11754  |
| 0 | 4.37299  |
| 0 | 3.88416  |
| 0 | 4.13082  |
| 0 | 4.12891  |
| 1 | -4.03829 |
| 0 | 4.29157  |
| 0 | 4.054    |
| 1 | -3.90016 |
| 0 | 5.00366  |
| 0 | 4.25528  |
| 0 | 5.18685  |
| 0 | 3.96863  |
| 0 | 3.97157  |
| 0 | 4.88543  |
| 0 | 4.59008  |
| 0 | 3.96854  |
| 1 | -3.94537 |
| 1 | -4.03637 |
| 1 | -4.09883 |
| 0 | 4.34776  |

|   |          |
|---|----------|
| 1 | -3.93414 |
| 1 | -4.17075 |
| 0 | 5.15201  |
| 1 | -3.88738 |
| 0 | 3.92475  |
| 0 | 4.18709  |
| 1 | -4.13714 |
| 1 | -4.00373 |
| 1 | -4.13299 |
| 1 | -4.10872 |
| 1 | -3.90794 |
| 1 | -4.0366  |
| 1 | -3.96855 |
| 0 | 4.13459  |
| 1 | -3.91191 |
| 1 | -4.085   |
| 0 | 3.9868   |
| 1 | -3.9701  |
| 0 | 4.35369  |
| 1 | -4.05058 |
| 1 | -4.07837 |
| 0 | 4.27223  |
| 0 | 4.27223  |
| 1 | -3.93796 |
| 1 | -3.89099 |
| 1 | -4.04658 |
| 1 | -4.04658 |
| 0 | 3.95513  |
| 1 | -4.15837 |
| 0 | 3.91689  |
| 1 | -4.19115 |
| 1 | -3.88192 |
| 0 | 4.04214  |
| 0 | 4.04088  |
| 0 | 5.2289   |
| 1 | -4.1924  |
| 0 | 4.08463  |
| 1 | -4.01161 |
| 0 | 4.12655  |
| 0 | 4.15937  |
| 1 | -4.16505 |
| 1 | -4.16505 |
| 0 | 4.04654  |
| 0 | 3.91604  |
| 1 | -3.96356 |
| 0 | 4.21695  |
| 1 | -4.14869 |



|   |          |
|---|----------|
| 1 | -3.9603  |
| 1 | -4.03332 |
| 1 | -4.16773 |
| 1 | -4.15645 |
| 1 | -4.1284  |
| 1 | -4.0891  |
| 0 | 4.05127  |
| 1 | -4.00852 |
| 1 | -4.00852 |
| 1 | -4.0133  |
| 1 | -4.0133  |
| 1 | -4.14236 |
| 1 | -4.02022 |
| 1 | -4.02022 |
| 0 | 4.35981  |
| 1 | -4.16207 |
| 0 | 4.09337  |
| 0 | 4.24567  |
| 1 | -3.89713 |
| 0 | 4.07888  |
| 1 | -3.87776 |
| 0 | 3.88378  |
| 1 | -4.03093 |
| 1 | -4.15695 |
| 0 | 4.03902  |
| 0 | 4.18498  |
| 0 | 4.07427  |
| 1 | -4.08051 |
| 1 | -4.15665 |
| 0 | 3.87238  |
| 1 | -3.91361 |
| 1 | -4.21894 |
| 1 | -4.01222 |
| 1 | -4.19139 |
| 0 | 4.05886  |
| 1 | -4.14019 |
| 0 | 4.04223  |
| 1 | -3.89079 |
| 1 | -3.89079 |
| 1 | -3.9369  |
| 1 | -3.90694 |
| 1 | -3.90694 |
| 1 | -4.17877 |
| 1 | -4.19677 |
| 1 | -3.99587 |
| 0 | 4.07063  |
| 0 | 4.20388  |

|   |          |
|---|----------|
| 1 | -4.05605 |
| 1 | -4.10934 |
| 0 | 3.90704  |
| 1 | -4.15436 |
| 0 | 3.90108  |
| 0 | 4.19165  |
| 1 | -4.1156  |
| 1 | -3.87803 |
| 1 | -4.13969 |
| 1 | -4.04667 |
| 0 | 4.04991  |
| 1 | -4.13324 |
| 0 | 4.25712  |
| 0 | 4.30775  |
| 0 | 3.96026  |
| 1 | -4.02756 |
| 1 | -3.92169 |
| 1 | -4.14925 |
| 1 | -3.94086 |
| 1 | -4.20732 |
| 1 | -3.94965 |
| 1 | -3.8937  |
| 0 | 4.70252  |
| 0 | 3.92706  |
| 1 | -4.15527 |
| 0 | 4.11051  |
| 1 | -4.02959 |
| 1 | -4.11788 |
| 1 | -4.11788 |
| 1 | -4.20519 |
| 1 | -4.00398 |
| 1 | -3.92745 |
| 1 | -4.11673 |
| 1 | -4.11673 |
| 1 | -3.90527 |
| 1 | -3.90527 |
| 1 | -4.156   |
| 1 | -4.03951 |
| 1 | -4.04261 |
| 1 | -4.02939 |
| 1 | -4.10947 |
| 1 | -4.18192 |
| 1 | -3.89737 |
| 1 | -4.1498  |
| 0 | 4.0774   |
| 0 | 4.0774   |
| 1 | -4.13298 |

|   |          |
|---|----------|
| 0 | 3.95811  |
| 1 | -4.00626 |
| 0 | 5.14713  |
| 0 | 5.01396  |
| 0 | 5.00001  |
| 1 | -4.08783 |
| 0 | 3.88176  |
| 0 | 4.36174  |
| 1 | -4.02704 |
| 0 | 5.00626  |
| 0 | 4.22169  |
| 0 | 3.95745  |
| 1 | -3.98687 |
| 1 | -3.99974 |
| 0 | 3.89327  |
| 1 | -4.05228 |
| 1 | -4.05228 |
| 0 | 5.32155  |
| 0 | 3.94715  |
| 0 | 3.94715  |
| 1 | -4.12148 |
| 1 | -4.12078 |
| 1 | -4.1555  |
| 0 | 3.93134  |
| 0 | 4.35407  |
| 0 | 4.04593  |
| 0 | 5.2239   |
| 0 | 4.81877  |
| 0 | 4.14864  |
| 0 | 4.14864  |
| 0 | 4.29561  |
| 0 | 4.21144  |
| 0 | 4.32588  |
| 1 | -4.02229 |
| 1 | -4.07794 |
| 0 | 4.03297  |
| 0 | 4.20349  |
| 1 | -3.99626 |
| 1 | -3.97657 |
| 1 | -4.02852 |
| 1 | -4.20291 |
| 0 | 4.3484   |
| 1 | -4.15941 |
| 0 | 5.10235  |
| 0 | 3.88597  |
| 0 | 5.12489  |
| 0 | 4.1273   |

|   |          |
|---|----------|
| 0 | 4.05567  |
| 0 | 4.05567  |
| 0 | 5.03924  |
| 0 | 4.21642  |
| 0 | 5.03959  |
| 0 | 4.08912  |
| 1 | -4.05798 |
| 0 | 3.94002  |
| 1 | -3.90236 |
| 1 | -3.90236 |
| 1 | -3.94819 |
| 0 | 4.45958  |
| 1 | -4.01407 |
| 1 | -4.06784 |
| 1 | -4.06514 |
| 0 | 3.92926  |
| 0 | 4.08349  |
| 0 | 4.03302  |
| 1 | -4.04923 |
| 1 | -4.06432 |
| 1 | -4.06432 |
| 0 | 4.07747  |
| 0 | 4.07747  |
| 1 | -4.01951 |
| 1 | -4.03405 |
| 0 | 4.22532  |
| 1 | -3.97704 |
| 0 | 3.9748   |
| 0 | 3.9748   |
| 0 | 4.03965  |
| 0 | 4.03965  |
| 0 | 5.0716   |
| 1 | -3.90629 |
| 0 | 3.88051  |
| 0 | 4.21171  |
| 0 | 3.87493  |
| 0 | 4.13484  |
| 0 | 4.17183  |
| 0 | 4.00413  |
| 1 | -4.0934  |
| 1 | -4.14339 |
| 0 | 4.33324  |
| 1 | -4.11564 |
| 0 | 4.13339  |
| 0 | 4.24795  |
| 0 | 4.04028  |
| 0 | 4.45068  |

|   |          |
|---|----------|
| 1 | -4.11313 |
| 0 | 4.62101  |
| 0 | 4.36723  |
| 1 | -4.21336 |
| 0 | 4.14277  |
| 0 | 3.87244  |
| 0 | 4.03205  |
| 0 | 5.32564  |
| 0 | 3.91345  |
| 0 | 4.08857  |
| 0 | 5.29911  |
| 0 | 5.04388  |
| 0 | 3.86899  |
| 0 | 4.09168  |
| 0 | 4.03919  |
| 0 | 4.12118  |
| 0 | 4.67594  |
| 0 | 3.99112  |
| 0 | 4.35045  |
| 0 | 3.98702  |
| 0 | 5.12476  |
| 0 | 5.12476  |
| 0 | 4.83952  |
| 0 | 4.83952  |
| 0 | 4.85497  |
| 0 | 4.16743  |
| 0 | 4.33977  |
| 0 | 4.33977  |
| 1 | -4.17386 |
| 1 | -4.12306 |
| 1 | -4.18646 |
| 0 | 3.9812   |
| 1 | -4.0383  |
| 1 | -4.19952 |
| 0 | 4.09643  |
| 0 | 4.21551  |
| 0 | 5.05374  |
| 0 | 4.33003  |
| 0 | 4.06585  |
| 0 | 4.23979  |
| 0 | 4.23979  |
| 1 | -3.95443 |
| 1 | -4.07014 |
| 0 | 3.88686  |
| 0 | 3.9033   |
| 0 | 3.9033   |
| 0 | 5.02194  |

|   |          |
|---|----------|
| 0 | 5.17673  |
| 0 | 4.17396  |
| 0 | 4.28784  |
| 1 | -4.01597 |
| 1 | -4.01597 |
| 1 | -3.89674 |
| 1 | -4.04739 |
| 1 | -4.11867 |
| 0 | 4.13988  |
| 0 | 3.96454  |
| 1 | -4.00494 |
| 1 | -3.92373 |
| 0 | 4.08824  |
| 0 | 4.27462  |
| 0 | 4.02479  |
| 0 | 5.07311  |
| 0 | 4.27061  |
| 1 | -3.9035  |
| 1 | -4.21609 |
| 1 | -3.9953  |
| 1 | -4.10512 |
| 0 | 3.93535  |
| 0 | 3.88097  |
| 0 | 4.09212  |
| 0 | 3.99783  |
| 1 | -3.93484 |
| 1 | -3.88505 |
| 0 | 4.07374  |
| 0 | 3.97667  |
| 0 | 5.62245  |
| 1 | -4.00094 |
| 1 | -4.03614 |
| 1 | -4.11911 |
| 1 | -4.11092 |
| 0 | 4.67201  |
| 1 | -4.04175 |
| 0 | 3.97677  |
| 1 | -4.10978 |
| 1 | -4.16357 |
| 1 | -3.95959 |
| 1 | -4.03176 |
| 0 | 5.18409  |
| 1 | -4.14154 |
| 0 | 3.98163  |
| 0 | 4.18496  |
| 0 | 4.04895  |
| 0 | 4.01819  |

|   |          |
|---|----------|
| 0 | 5.06581  |
| 0 | 4.05061  |
| 0 | 4.15427  |
| 0 | 4.13364  |
| 0 | 5.10528  |
| 0 | 3.90827  |
| 1 | -4.10152 |
| 1 | -4.20393 |
| 1 | -4.03199 |
| 0 | 5.64524  |
| 1 | -4.17153 |
| 0 | 3.98423  |
| 0 | 3.98423  |
| 0 | 4.0309   |
| 0 | 4.0309   |
| 0 | 4.07077  |
| 1 | -3.90525 |
| 1 | -4.12554 |
| 1 | -4.13006 |
| 0 | 4.00684  |
| 0 | 4.15826  |
| 0 | 5.05247  |
| 0 | 5.07093  |
| 0 | 4.23499  |
| 0 | 4.2315   |
| 0 | 4.04051  |
| 0 | 3.96847  |
| 0 | 4.48707  |
| 1 | -3.8861  |
| 1 | -4.10083 |
| 0 | 4.16163  |
| 1 | -4.04251 |
| 1 | -4.12629 |
| 0 | 5.46326  |
| 0 | 4.19028  |
| 1 | -4.04695 |
| 0 | 5.23025  |
| 0 | 5.2296   |
| 0 | 5.24024  |
| 1 | -4.08269 |
| 0 | 4.21188  |
| 0 | 5.21909  |
| 0 | 5.14979  |
| 1 | -4.02245 |
| 1 | -4.02245 |
| 0 | 5.39914  |
| 0 | 5.39914  |

|   |          |
|---|----------|
| 0 | 4.00945  |
| 0 | 4.45108  |
| 1 | -4.12694 |
| 1 | -4.00381 |
| 1 | -4.02647 |
| 0 | 4.24282  |
| 0 | 5.19203  |
| 0 | 4.03172  |
| 1 | -3.89686 |
| 0 | 4.16265  |
| 0 | 4.03311  |
| 0 | 3.8682   |
| 1 | -4.21965 |
| 0 | 4.36357  |
| 0 | 4.60112  |
| 1 | -3.92615 |
| 1 | -3.92615 |
| 1 | -4.0615  |
| 1 | -4.0099  |
| 0 | 4.32718  |
| 0 | 5.08641  |
| 0 | 4.18037  |
| 0 | 5.13094  |
| 0 | 4.1576   |
| 0 | 5.51217  |
| 1 | -3.99256 |
| 0 | 4.00498  |
| 1 | -4.16102 |
| 0 | 4.24999  |
| 1 | -4.10461 |
| 1 | -3.922   |
| 1 | -4.18633 |
| 0 | 4.17246  |
| 0 | 4.17246  |
| 0 | 5.44943  |
| 0 | 4.16451  |
| 0 | 5.29669  |
| 0 | 4.52775  |
| 1 | -3.87783 |
| 0 | 4.1421   |
| 0 | 4.24309  |
| 0 | 4.55833  |
| 0 | 4.74574  |
| 0 | 4.38165  |
| 0 | 4.30585  |
| 0 | 4.3999   |
| 0 | 3.86971  |



|   |          |
|---|----------|
| 1 | -3.96254 |
| 0 | 4.20957  |
| 1 | -4.06234 |
| 1 | -4.06234 |
| 1 | -3.9343  |
| 1 | -4.06308 |
| 1 | -4.16245 |
| 1 | -4.10544 |
| 0 | 4.07595  |
| 1 | -4.08345 |
| 0 | 3.91653  |
| 0 | 4.02283  |
| 0 | 3.94298  |
| 1 | -4.00346 |
| 1 | -3.89315 |
| 0 | 4.00433  |
| 1 | -4.04327 |
| 0 | 4.41468  |
| 0 | 4.18955  |
| 1 | -4.16705 |
| 0 | 4.00196  |
| 0 | 3.90782  |
| 1 | -3.99487 |
| 0 | 5.05174  |
| 0 | 5.14213  |
| 0 | 4.13341  |
| 0 | 5.38646  |
| 0 | 5.18463  |
| 0 | 4.00571  |
| 0 | 5.06111  |
| 0 | 4.0607   |
| 0 | 5.04481  |
| 0 | 3.95021  |
| 0 | 4.46354  |
| 0 | 3.88718  |
| 0 | 5.034    |
| 0 | 4.30454  |
| 0 | 4.06244  |
| 0 | 4.32521  |
| 0 | 4.04109  |
| 0 | 4.67692  |
| 0 | 4.40402  |
| 0 | 5.26924  |
| 0 | 5.14739  |
| 0 | 4.24504  |
| 0 | 5.30343  |
| 0 | 4.18896  |

|   |          |
|---|----------|
| 0 | 4.952    |
| 0 | 4.20993  |
| 0 | 5.29328  |
| 0 | 4.24575  |
| 1 | -4.03173 |
| 0 | 4.00458  |
| 0 | 3.87693  |
| 0 | 4.40298  |
| 0 | 3.90667  |
| 1 | -4.00864 |
| 0 | 4.23634  |
| 0 | 5.04019  |
| 0 | 3.90547  |
| 0 | 4.03458  |
| 0 | 4.03458  |
| 0 | 4.01833  |
| 0 | 4.7406   |
| 0 | 4.12135  |
| 0 | 3.90554  |
| 0 | 4.00054  |
| 0 | 4.3733   |
| 1 | -4.19082 |
| 1 | -4.11901 |
| 0 | 4.1128   |
| 0 | 3.88569  |
| 0 | 4.15137  |
| 0 | 4.00407  |
| 1 | -3.98565 |
| 0 | 5.2337   |
| 0 | 5.2337   |
| 1 | -3.96953 |
| 0 | 4.87859  |
| 1 | -3.93615 |
| 0 | 4.01641  |
| 0 | 4.02525  |
| 0 | 4.02273  |
| 0 | 4.12784  |
| 0 | 4.19326  |
| 1 | -3.91332 |
| 0 | 4.06815  |
| 1 | -4.03348 |
| 1 | -4.01486 |
| 0 | 4.07622  |
| 0 | 4.16762  |
| 0 | 4.02856  |
| 0 | 4.02856  |
| 1 | -3.87927 |

|   |          |
|---|----------|
| 1 | -3.87927 |
| 1 | -3.89659 |
| 0 | 3.93446  |
| 0 | 4.70782  |
| 0 | 4.03007  |
| 1 | -4.02914 |
| 0 | 4.15494  |
| 0 | 5.07847  |
| 0 | 4.25525  |
| 0 | 3.90536  |
| 0 | 4.19886  |
| 1 | -4.07334 |
| 1 | -4.07334 |
| 1 | -4.12656 |
| 1 | -4.05803 |
| 0 | 4.01187  |
| 1 | -4.00559 |
| 0 | 3.89459  |
| 0 | 3.89459  |
| 1 | -4.04147 |
| 0 | 3.86706  |
| 1 | -3.88203 |
| 0 | 4.05341  |
| 1 | -4.13076 |
| 0 | 4.03389  |
| 0 | 4.01749  |
| 0 | 4.29792  |
| 1 | -4.03655 |
| 1 | -4.0724  |
| 1 | -4.00216 |
| 1 | -4.05056 |
| 1 | -4.01179 |
| 1 | -4.14433 |
| 0 | 4.11827  |
| 1 | -4.10605 |
| 1 | -4.06091 |
| 1 | -3.93783 |
| 1 | -4.02728 |
| 1 | -4.04717 |
| 1 | -4.16362 |
| 1 | -4.07648 |
| 0 | 4.04423  |
| 1 | -4.134   |
| 0 | 4.24819  |
| 0 | 3.87693  |
| 0 | 4.03128  |
| 1 | -4.11825 |

|   |          |
|---|----------|
| 1 | -4.07628 |
| 1 | -4.1152  |
| 1 | -4.1152  |
| 0 | 3.91747  |
| 0 | 4.15036  |
| 1 | -4.12097 |
| 0 | 3.95033  |
| 0 | 5.36336  |
| 0 | 5.36336  |
| 0 | 4.28381  |
| 0 | 4.11886  |

## Gene List G4+/- H3K14ac

| chromosome | feature start | feature end | feature   | chromosome | region start | region end |
|------------|---------------|-------------|-----------|------------|--------------|------------|
| 1          | 194868193     | 194876865   | NM_181048 | chr1       | 194869706    | 194870321  |
| 1          | 194847836     | 194856385   | NM_016851 | chr1       | 194854049    | 194854905  |
| 1          | 194733923     | 194742422   | NM_181546 | chr1       | 194735650    | 194736294  |
| 1          | 193885596     | 193894142   | NM_010600 | chr1       | 193887687    | 193888344  |
| 1          | 193768741     | 193781114   | NM_181796 | chr1       | 193772235    | 193772760  |
| 1          | 193601396     | 193609904   | NM_009579 | chr1       | 193603861    | 193604466  |
| 1          | 193516148     | 193524703   | NM_010892 | chr1       | 193521684    | 193522285  |
| 1          | 191423056     | 191431555   | NM_008976 | chr1       | 191430222    | 191431144  |
| 1          | 191383395     | 191394874   | DQ642022  | chr1       | 191391385    | 191391998  |
| 1          | 190976123     | 190984622   | BC056167  | chr1       | 190979122    | 190979711  |
| 1          | 186544119     | 186552635   | NM_133684 | chr1       | 186545819    | 186546701  |
| 1          | 186502357     | 186517985   | BC028441  | chr1       | 186510339    | 186511104  |
| 1          | 184802852     | 184811974   | AF186107  | chr1       | 184805539    | 184806261  |
| 1          | 183183303     | 183192176   | NM_028408 | chr1       | 183184103    | 183184720  |
| 1          | 182765697     | 182785739   | NM_144794 | chr1       | 182780831    | 182781462  |
| 1          | 182681826     | 182690325   | NM_145943 | chr1       | 182686768    | 182687413  |
| 1          | 182531210     | 182539709   | NM_013729 | chr1       | 182531237    | 182531614  |
| 1          | 182418606     | 182427105   | AF126717  | chr1       | 182424200    | 182425129  |
| 1          | 182164726     | 182173225   | NM_199472 | chr1       | 182172530    | 182173182  |
| 1          | 182164726     | 182173225   | NM_199472 | chr1       | 182171306    | 182172290  |
| 2          | 181620717     | 181633848   | NM_026446 | chr2       | 181626212    | 181626856  |
| 2          | 181473873     | 181482372   | BC024465  | chr2       | 181477856    | 181478601  |
| 2          | 181304642     | 181313801   | NM_023684 | chr2       | 181308741    | 181309662  |
| 2          | 181288335     | 181297422   | NM_144894 | chr2       | 181294917    | 181295848  |
| 2          | 181292247     | 181300768   | NM_029702 | chr2       | 181294917    | 181295848  |
| 2          | 181139915     | 181148592   | NM_011481 | chr2       | 181146100    | 181146690  |
| 2          | 181143423     | 181151922   | NM_199312 | chr2       | 181146100    | 181146690  |
| 2          | 181129668     | 181138196   | NM_009184 | chr2       | 181135125    | 181135721  |
| 2          | 180847816     | 180856344   | NM_173761 | chr2       | 180855875    | 180856812  |
| 2          | 180847816     | 180856344   | NM_173761 | chr2       | 180852300    | 180852900  |
| 2          | 180847816     | 180856344   | NM_173761 | chr2       | 180851491    | 180852247  |
| 2          | 180703718     | 180712308   | NM_080641 | chr2       | 180703956    | 180705054  |
| 2          | 180521630     | 180530129   | NM_009936 | chr2       | 180524302    | 180525024  |
| 2          | 180504712     | 180521368   | NM_031373 | chr2       | 180514620    | 180515311  |
| 1          | 180359800     | 180368636   | NM_177724 | chr1       | 180363981    | 180364480  |
| 2          | 180261463     | 180270081   | NM_008093 | chr2       | 180265729    | 180266490  |
| 2          | 180042774     | 180051280   | NM_144500 | chr2       | 180045445    | 180046152  |
| 2          | 179995200     | 180003700   | NM_181424 | chr2       | 179995551    | 179996955  |
| 2          | 179995200     | 180003700   | NM_181424 | chr2       | 179994766    | 179995499  |
| 1          | 179273082     | 179285993   | NM_013915 | chr1       | 179280126    | 179280740  |
| 1          | 178648243     | 178656742   | BC057019  | chr1       | 178655759    | 178656395  |
| 1          | 178047861     | 178056360   | BC100428  | chr1       | 178055401    | 178056053  |
| 1          | 177526749     | 177535265   | NM_021350 | chr1       | 177527153    | 177527867  |
| 1          | 176221746     | 176230245   | NM_146714 | chr1       | 176227906    | 176228928  |

|   |   |           |           |              |      |           |           |
|---|---|-----------|-----------|--------------|------|-----------|-----------|
|   | 1 | 174171885 | 174180575 | NM_001039484 | chr1 | 174177488 | 174178096 |
|   | 1 | 174032591 | 174049456 | NM_011063    | chr1 | 174041163 | 174041747 |
|   | 2 | 172859330 | 172867831 | NM_021394    | chr2 | 172866016 | 172866634 |
|   | 2 | 172658852 | 172667396 | NM_019547    | chr2 | 172665024 | 172665635 |
|   | 2 | 172616781 | 172625317 | NM_012046    | chr2 | 172620270 | 172621026 |
|   | 2 | 172030814 | 172039321 | NM_025912    | chr2 | 172036507 | 172037391 |
|   | 1 | 171581796 | 171590317 | NM_009062    | chr1 | 171585351 | 171585942 |
|   | 2 | 170417012 | 170425658 | NM_029761    | chr2 | 170423161 | 170424105 |
|   | 2 | 169970168 | 169978667 | BC098225     | chr2 | 169977699 | 169978526 |
|   | 1 | 169520233 | 169528811 | NM_033652    | chr1 | 169525290 | 169525888 |
|   | 1 | 169429059 | 169437892 | NM_009107    | chr1 | 169430570 | 169431700 |
|   | 1 | 169227973 | 169236472 | NM_025569    | chr1 | 169232198 | 169232793 |
|   | 1 | 168832150 | 168840649 | NM_175461    | chr1 | 168836574 | 168837200 |
|   | 1 | 168233593 | 168242092 | BC062177     | chr1 | 168236233 | 168236829 |
|   | 1 | 167542190 | 167550769 | NM_178593    | chr1 | 167542760 | 167543414 |
|   | 1 | 167028496 | 167036995 | NM_145512    | chr1 | 167033969 | 167034660 |
|   | 1 | 166292169 | 166301030 | NM_009721    | chr1 | 166297979 | 166298570 |
|   | 1 | 165892779 | 165901311 | NM_011346    | chr1 | 165898780 | 165899647 |
|   | 2 | 165473422 | 165481921 | BC012446     | chr2 | 165478739 | 165479429 |
| X |   | 165317556 | 165326055 | BC059027     | chrX | 165320995 | 165321578 |
|   | 2 | 165182020 | 165190519 | NM_001007581 | chr2 | 165184839 | 165185443 |
|   | 2 | 165182020 | 165190519 | NM_001007581 | chr2 | 165182281 | 165182909 |
| X |   | 165166264 | 165174763 | AF026565     | chrX | 165172345 | 165173138 |
|   | 2 | 165089068 | 165097599 | NM_029021    | chr2 | 165092303 | 165093290 |
|   | 2 | 164966547 | 164975046 | BC064092     | chr2 | 164974257 | 164974933 |
|   | 2 | 164966547 | 164975046 | BC064092     | chr2 | 164972769 | 164973354 |
|   | 2 | 164740841 | 164749382 | NM_170701    | chr2 | 164747019 | 164747912 |
|   | 2 | 164723485 | 164732022 | NM_144892    | chr2 | 164724006 | 164724617 |
|   | 2 | 164564573 | 164573103 | NM_146129    | chr2 | 164570045 | 164570658 |
|   | 2 | 164546319 | 164554913 | NM_011125    | chr2 | 164548149 | 164548864 |
|   | 2 | 164517202 | 164530661 | BC116354     | chr2 | 164529231 | 164530108 |
|   | 2 | 164507891 | 164527521 | NM_008906    | chr2 | 164518522 | 164519357 |
|   | 2 | 164517202 | 164530661 | BC116354     | chr2 | 164518522 | 164519357 |
|   | 2 | 164468429 | 164476939 | NM_009394    | chr2 | 164468821 | 164469478 |
|   | 2 | 164298905 | 164307404 | NM_001012725 | chr2 | 164298722 | 164299312 |
|   | 2 | 164247921 | 164256420 | NM_026323    | chr2 | 164251661 | 164252328 |
|   | 2 | 164018206 | 164026705 | NM_009301    | chr2 | 164023955 | 164024560 |
|   | 2 | 163974724 | 163983223 | NM_021363    | chr2 | 163980818 | 163981599 |
|   | 2 | 163860031 | 163868554 | NM_008435    | chr2 | 163861576 | 163862325 |
|   | 1 | 163799865 | 163809414 | NM_026078    | chr1 | 163801569 | 163802185 |
|   | 1 | 163561783 | 163570359 | BC057865     | chr1 | 163567669 | 163568284 |
|   | 2 | 163379478 | 163387982 | NM_011106    | chr2 | 163382037 | 163382816 |
|   | 2 | 163123919 | 163132418 | NM_144891    | chr2 | 163129910 | 163130501 |
|   | 2 | 163026052 | 163034551 | BC022635     | chr2 | 163028845 | 163029488 |
|   | 1 | 162865856 | 162874926 | BC004622     | chr1 | 162873521 | 162874182 |
|   | 1 | 162868419 | 162877512 | NM_173424    | chr1 | 162873521 | 162874182 |
|   | 2 | 162740076 | 162748629 | NM_008652    | chr2 | 162745441 | 162746192 |

|   |   |           |           |              |      |           |           |
|---|---|-----------|-----------|--------------|------|-----------|-----------|
|   | 2 | 162672987 | 162686890 | NM_013731    | chr2 | 162685175 | 162685805 |
| X |   | 162671656 | 162680633 | NM_133211    | chrX | 162674504 | 162674999 |
|   | 1 | 162626963 | 162635615 | NM_013862    | chr1 | 162629284 | 162629926 |
| X |   | 161821260 | 161833713 | NM_019773    | chrX | 161829153 | 161829802 |
|   | 2 | 160055710 | 160064443 | NM_010658    | chr2 | 160063023 | 160063628 |
|   | 2 | 160055710 | 160064443 | NM_010658    | chr2 | 160059222 | 160060180 |
|   | 3 | 159768988 | 159777487 | NM_026582    | chr3 | 159776597 | 159777199 |
| X |   | 159599785 | 159608298 | NM_009759    | chrX | 159603946 | 159604540 |
|   | 3 | 159529602 | 159538109 | NM_029987    | chr3 | 159533371 | 159533969 |
| X |   | 159417655 | 159426245 | NM_009173    | chrX | 159420101 | 159420886 |
|   | 1 | 158669700 | 158678199 | NM_028333    | chr1 | 158672055 | 158672819 |
|   | 2 | 158466849 | 158479006 | NM_027975    | chr2 | 158477371 | 158478032 |
|   | 2 | 158321176 | 158329675 | BC069972     | chr2 | 158325812 | 158326180 |
|   | 2 | 158321176 | 158329675 | BC069972     | chr2 | 158323659 | 158324241 |
|   | 2 | 158310354 | 158318872 | NM_175419    | chr2 | 158312282 | 158313068 |
| X |   | 158306154 | 158314704 | NM_009789    | chrX | 158310632 | 158311224 |
| X |   | 157985207 | 157993708 | NM_178256    | chrX | 157985803 | 157986420 |
|   | 3 | 157876544 | 157885258 | NM_001013806 | chr3 | 157881427 | 157882169 |
|   | 2 | 157698302 | 157706801 | NM_029282    | chr2 | 157700511 | 157701100 |
|   | 3 | 157496185 | 157504692 | NM_011196    | chr3 | 157503374 | 157503967 |
|   | 3 | 157496185 | 157504692 | NM_011196    | chr3 | 157502182 | 157502780 |
|   | 1 | 157177048 | 157185662 | NM_011273    | chr1 | 157179315 | 157179910 |
|   | 2 | 157109730 | 157118246 | NM_009271    | chr2 | 157112354 | 157112738 |
|   | 1 | 156859329 | 156867854 | NM_010500    | chr1 | 156864300 | 156864698 |
| X |   | 156455298 | 156470872 | AF285577     | chrX | 156461501 | 156462228 |
| X |   | 156455298 | 156470872 | AF285577     | chrX | 156457968 | 156458339 |
|   | 2 | 156106493 | 156115052 | NM_001003815 | chr2 | 156108397 | 156109078 |
|   | 2 | 155829785 | 155838284 | NM_025946    | chr2 | 155835437 | 155836129 |
|   | 2 | 155833106 | 155841626 | NM_010911    | chr2 | 155835437 | 155836129 |
| X |   | 155768452 | 155776951 | BC116644     | chrX | 155771899 | 155772590 |
|   | 2 | 155677075 | 155685574 | U33198       | chr2 | 155683243 | 155683932 |
|   | 2 | 155677075 | 155685574 | U33198       | chr2 | 155679877 | 155680475 |
|   | 1 | 155630563 | 155639062 | NM_001008426 | chr1 | 155637292 | 155637891 |
|   | 2 | 155508170 | 155532295 | NM_027788    | chr2 | 155519766 | 155520519 |
|   | 1 | 155496566 | 155505115 | NM_011267    | chr1 | 155502455 | 155503087 |
|   | 2 | 155460785 | 155469339 | NM_010808    | chr2 | 155462943 | 155463552 |
|   | 4 | 155010378 | 155018877 | BC064021     | chr4 | 155017090 | 155017877 |
|   | 4 | 155010378 | 155018877 | BC064021     | chr4 | 155013970 | 155014581 |
|   | 4 | 155010378 | 155018877 | BC064021     | chr4 | 155010594 | 155011185 |
|   | 4 | 154892118 | 154909144 | NM_029264    | chr4 | 154894662 | 154895353 |
|   | 4 | 154800118 | 154808651 | NM_026125    | chr4 | 154800274 | 154801247 |
|   | 4 | 154781631 | 154795304 | NM_021402    | chr4 | 154787403 | 154788007 |
|   | 4 | 154724609 | 154738598 | NM_207223    | chr4 | 154735138 | 154735773 |
|   | 4 | 154724609 | 154738598 | NM_207223    | chr4 | 154731671 | 154732605 |
|   | 4 | 154707367 | 154715882 | NM_028020    | chr4 | 154709159 | 154710299 |
|   | 4 | 154650289 | 154667372 | NM_207678    | chr4 | 154664326 | 154665750 |
|   | 4 | 154508410 | 154519027 | NM_145124    | chr4 | 154512771 | 154513422 |

|   |   |           |                        |      |           |           |
|---|---|-----------|------------------------|------|-----------|-----------|
|   | 4 | 154471966 | 154480472 BC051012     | chr4 | 154477517 | 154478439 |
|   | 2 | 154234345 | 154242844 NM_029305    | chr2 | 154235112 | 154235695 |
|   | 3 | 153904822 | 153913321 BC086641     | chr3 | 153910971 | 153911554 |
|   | 3 | 153810391 | 153823629 AY351591     | chr3 | 153819542 | 153820141 |
|   | 4 | 153769378 | 153777877 NM_178931    | chr4 | 153771660 | 153772274 |
|   | 2 | 153585829 | 153594328 NM_199303    | chr2 | 153590317 | 153590901 |
|   | 1 | 153511592 | 153520091 NM_001039644 | chr1 | 153515652 | 153516345 |
|   | 2 | 153334895 | 153343557 NM_001003961 | chr2 | 153339802 | 153340397 |
|   | 1 | 153260515 | 153269041 NM_011277    | chr1 | 153262777 | 153263591 |
|   | 1 | 153184866 | 153193382 NM_026876    | chr1 | 153190378 | 153191111 |
|   | 1 | 153188094 | 153196654 NM_025819    | chr1 | 153190378 | 153191111 |
|   | 1 | 153100716 | 153114135 NM_054102    | chr1 | 153108372 | 153109091 |
|   | 2 | 153031580 | 153040079 NM_001039939 | chr2 | 153037940 | 153038558 |
|   | 2 | 152976870 | 152985389 NM_008444    | chr2 | 152983104 | 152983948 |
|   | 4 | 152938361 | 152946860 BC066045     | chr4 | 152940016 | 152940619 |
|   | 3 | 152917072 | 152925596 NM_012028    | chr3 | 152923944 | 152924524 |
|   | 2 | 152914325 | 152922824 NM_198617    | chr2 | 152922522 | 152923230 |
|   | 4 | 152883978 | 152892477 NM_001033455 | chr4 | 152885739 | 152886339 |
|   | 4 | 152883978 | 152892477 NM_001033455 | chr4 | 152884580 | 152885225 |
|   | 4 | 152883978 | 152892477 NM_001033455 | chr4 | 152883537 | 152884130 |
|   | 4 | 152849603 | 152858102 NM_201226    | chr4 | 152850410 | 152851536 |
|   | 4 | 152813361 | 152821860 NM_177673    | chr4 | 152816333 | 152817100 |
|   | 4 | 152816312 | 152824926 NM_007859    | chr4 | 152816333 | 152817100 |
|   | 4 | 152813361 | 152821860 NM_177673    | chr4 | 152813439 | 152814451 |
|   | 3 | 152434237 | 152442736 AB060081     | chr3 | 152434412 | 152435172 |
|   | 2 | 152153534 | 152162033 NM_001037933 | chr2 | 152158625 | 152159437 |
|   | 2 | 152063234 | 152074039 NM_001009948 | chr2 | 152066035 | 152067013 |
|   | 1 | 152025771 | 152037479 BC086491     | chr1 | 152026340 | 152026955 |
|   | 2 | 151912326 | 151920887 NM_007788    | chr2 | 151919032 | 151919710 |
|   | 2 | 151659883 | 151677613 NM_028666    | chr2 | 151661517 | 151662450 |
|   | 4 | 151214373 | 151226792 BC098195     | chr4 | 151222162 | 151223000 |
|   | 4 | 151214373 | 151226792 BC098195     | chr4 | 151221102 | 151221732 |
|   | 4 | 151163526 | 151173779 NM_009079    | chr4 | 151170430 | 151171045 |
|   | 4 | 150996667 | 151005166 NM_008236    | chr4 | 151004196 | 151005036 |
|   | 4 | 150993508 | 151002007 NM_207687    | chr4 | 151000794 | 151001386 |
|   | 4 | 150996667 | 151005166 NM_008236    | chr4 | 151000794 | 151001386 |
|   | 4 | 150970172 | 150986125 NM_207688    | chr4 | 150979558 | 150980170 |
|   | 4 | 150877134 | 150885636 NM_028727    | chr4 | 150883208 | 150883809 |
|   | 4 | 150879791 | 150888368 NM_031867    | chr4 | 150883208 | 150883809 |
|   | 5 | 150842871 | 150851370 BC019754     | chr5 | 150846541 | 150847141 |
|   | 4 | 150771534 | 150780033 NM_172704    | chr4 | 150779561 | 150779978 |
|   | 2 | 150728297 | 150736820 NM_026086    | chr2 | 150728706 | 150729452 |
|   | 2 | 150698274 | 150706773 NM_207204    | chr2 | 150702023 | 150702770 |
|   | 2 | 150472229 | 150480736 NM_153781    | chr2 | 150478080 | 150478970 |
| X |   | 150370717 | 150380008 NM_020016    | chrX | 150377254 | 150378253 |
| X |   | 150287786 | 150296285 NM_020017    | chrX | 150289406 | 150290538 |
|   | 2 | 150140424 | 150148923 BC023805     | chr2 | 150142318 | 150143050 |



|   |   |           |           |              |      |           |           |
|---|---|-----------|-----------|--------------|------|-----------|-----------|
|   | 2 | 150051707 | 150060206 | NM_027017    | chr2 | 150053444 | 150054038 |
|   | 4 | 149897544 | 149907753 | NM_009498    | chr4 | 149901278 | 149901877 |
|   | 5 | 149489015 | 149497566 | NM_001013378 | chr5 | 149493374 | 149494179 |
|   | 5 | 149489015 | 149497566 | NM_001013378 | chr5 | 149490547 | 149491105 |
|   | 4 | 149039771 | 149050961 | NM_009802    | chr4 | 149046234 | 149046849 |
|   | 3 | 148752761 | 148764413 | BC026898     | chr3 | 148754439 | 148755267 |
|   | 2 | 148564343 | 148572928 | NM_009976    | chr2 | 148571732 | 148572395 |
|   | 2 | 148564343 | 148572928 | NM_009976    | chr2 | 148566487 | 148567094 |
|   | 6 | 148305826 | 148314353 | NM_025405    | chr6 | 148311969 | 148312559 |
|   | 2 | 148132477 | 148140985 | NM_010740    | chr2 | 148135373 | 148136140 |
|   | 2 | 148132477 | 148140985 | NM_010740    | chr2 | 148132888 | 148133703 |
|   | 2 | 148097044 | 148105544 | NM_009378    | chr2 | 148100860 | 148101481 |
|   | 4 | 147967963 | 147976541 | NM_007745    | chr4 | 147974582 | 147975264 |
|   | 4 | 147967963 | 147976541 | NM_007745    | chr4 | 147972171 | 147972761 |
|   | 4 | 147967963 | 147976541 | NM_007745    | chr4 | 147968834 | 147969802 |
| X |   | 147680621 | 147694343 | NM_029836    | chrX | 147682956 | 147683663 |
|   | 2 | 147050501 | 147059000 | NM_008780    | chr2 | 147057067 | 147057751 |
|   | 4 | 146993022 | 147009686 | NM_015797    | chr4 | 146995253 | 146995885 |
|   | 5 | 146892254 | 146901588 | NM_001010941 | chr5 | 146900194 | 146900947 |
|   | 5 | 146892254 | 146901588 | NM_001010941 | chr5 | 146893787 | 146894617 |
|   | 2 | 146713601 | 146722100 | BC004028     | chr2 | 146716660 | 146717270 |
|   | 5 | 146593144 | 146601643 | BC025046     | chr5 | 146595313 | 146595914 |
|   | 5 | 146529909 | 146538408 | NM_153599    | chr5 | 146537475 | 146538089 |
|   | 3 | 146528535 | 146537052 | NM_009474    | chr3 | 146529158 | 146529807 |
|   | 4 | 146456730 | 146465229 | NM_145078    | chr4 | 146459788 | 146460373 |
|   | 2 | 146200948 | 146209447 | NM_001033348 | chr2 | 146203690 | 146204370 |
| X |   | 146151878 | 146160998 | NM_030700    | chrX | 146154570 | 146155171 |
|   | 3 | 146081219 | 146090059 | NM_026656    | chr3 | 146089090 | 146089689 |
| X |   | 145987852 | 146004299 | NM_001002272 | chrX | 145989181 | 145989799 |
| X |   | 145926324 | 145934865 | NM_029943    | chrX | 145933947 | 145934839 |
|   | 2 | 145899706 | 145916051 | NM_016889    | chr2 | 145910148 | 145910747 |
|   | 2 | 145899706 | 145916051 | NM_016889    | chr2 | 145908360 | 145908950 |
|   | 6 | 145820000 | 145828499 | NM_024469    | chr6 | 145823427 | 145824015 |
|   | 3 | 145810391 | 145818890 | BC086777     | chr3 | 145816374 | 145816996 |
|   | 1 | 145763851 | 145772499 | NM_009061    | chr1 | 145765417 | 145766218 |
|   | 2 | 145620225 | 145628745 | NM_175280    | chr2 | 145621594 | 145622200 |
|   | 5 | 145387924 | 145396423 | NM_001008705 | chr5 | 145388600 | 145389186 |
|   | 5 | 145361783 | 145377685 | NM_023142    | chr5 | 145375865 | 145376250 |
|   | 3 | 144784189 | 144792688 | NM_139148    | chr3 | 144785391 | 144785989 |
|   | 3 | 144754364 | 144762872 | NM_030601    | chr3 | 144760060 | 144760871 |
|   | 5 | 144457317 | 144465816 | BC025567     | chr5 | 144457883 | 144458488 |
|   | 5 | 144437813 | 144447044 | NM_010800    | chr5 | 144438926 | 144439784 |
|   | 5 | 144437813 | 144447044 | NM_010800    | chr5 | 144437882 | 144438563 |
|   | 2 | 144239737 | 144248300 | NM_015754    | chr2 | 144241638 | 144242311 |
|   | 3 | 144137086 | 144148362 | NM_010723    | chr3 | 144137099 | 144137701 |
|   | 5 | 143616478 | 143637731 | NM_133355    | chr5 | 143633086 | 143633679 |
|   | 7 | 143626557 | 143648522 | NM_007856    | chr7 | 143630134 | 143630819 |

|   |           |           |              |      |           |           |
|---|-----------|-----------|--------------|------|-----------|-----------|
| 7 | 143573884 | 143582383 | NM_203492    | chr7 | 143580192 | 143580795 |
| 4 | 143451416 | 143459915 | NM_198661    | chr4 | 143456611 | 143457213 |
| 5 | 143439375 | 143451915 | NM_021326    | chr5 | 143447112 | 143447859 |
| 5 | 143440157 | 143449123 | NM_177880    | chr5 | 143447112 | 143447859 |
| 5 | 143219495 | 143228010 | NM_007984    | chr5 | 143225786 | 143226415 |
| 5 | 143141014 | 143149513 | NM_001002769 | chr5 | 143144899 | 143145525 |
| 5 | 143141014 | 143149513 | NM_001002769 | chr5 | 143141104 | 143141757 |
| 5 | 143080028 | 143088527 | NM_178242    | chr5 | 143086045 | 143087109 |
| 6 | 143054504 | 143063312 | NM_029081    | chr6 | 143060557 | 143061203 |
| 6 | 142918799 | 142927674 | NM_011374    | chr6 | 142920549 | 142921216 |
| 5 | 142710405 | 142718972 | NM_172725    | chr5 | 142713478 | 142714119 |
| X | 142644800 | 142656200 | NM_008356    | chrX | 142647872 | 142648488 |
| 6 | 142565817 | 142574316 | NM_177314    | chr6 | 142569427 | 142570011 |
| 6 | 142526032 | 142534581 | NM_008428    | chr6 | 142532393 | 142532990 |
| 6 | 142526032 | 142534581 | NM_008428    | chr6 | 142528393 | 142528981 |
| 3 | 142491531 | 142500493 | NM_018734    | chr3 | 142497796 | 142498422 |
| 7 | 142383906 | 142392849 | BC025150     | chr7 | 142386913 | 142387577 |
| 7 | 142179140 | 142187649 | NM_177265    | chr7 | 142180550 | 142181735 |
| 7 | 142103960 | 142112459 | NM_015808    | chr7 | 142105714 | 142106517 |
| 3 | 141866411 | 141874910 | BC065106     | chr3 | 141874244 | 141874889 |
| 7 | 141709278 | 141717805 | NM_023764    | chr7 | 141712106 | 141712711 |
| 7 | 141544512 | 141560657 | BC034197     | chr7 | 141556281 | 141557304 |
| 7 | 141292976 | 141330256 | NM_009842    | chr7 | 141324184 | 141324904 |
| 7 | 141292976 | 141330256 | NM_009842    | chr7 | 141321478 | 141322507 |
| 1 | 141312138 | 141320643 | NM_031164    | chr1 | 141318487 | 141319138 |
| 7 | 141292976 | 141330256 | NM_009842    | chr7 | 141314572 | 141315295 |
| 7 | 141292976 | 141330256 | NM_009842    | chr7 | 141310734 | 141311614 |
| 7 | 141278170 | 141301312 | NM_022654    | chr7 | 141291162 | 141291863 |
| 7 | 141278170 | 141301312 | NM_022654    | chr7 | 141278668 | 141279344 |
| 7 | 141251850 | 141260354 | NM_021329    | chr7 | 141257657 | 141258335 |
| 6 | 141205675 | 141214174 | NM_018779    | chr6 | 141205609 | 141206201 |
| 7 | 141137326 | 141145825 | NM_007878    | chr7 | 141144845 | 141145624 |
| 7 | 141125592 | 141136453 | NM_028069    | chr7 | 141127745 | 141128331 |
| 4 | 141095580 | 141104079 | NM_007919    | chr4 | 141099366 | 141100082 |
| 4 | 141060221 | 141068967 | NM_172338    | chr4 | 141068286 | 141068934 |
| 4 | 140992996 | 141001495 | NM_001017966 | chr4 | 140992974 | 140993535 |
| 7 | 140943715 | 140965994 | NM_178381    | chr7 | 140943894 | 140944557 |
| 7 | 140915595 | 140933597 | NM_019762    | chr7 | 140928988 | 140929606 |
| 5 | 140853815 | 140870668 | NM_008494    | chr5 | 140864459 | 140865261 |
| 7 | 140859517 | 140874228 | NM_025378    | chr7 | 140860821 | 140861847 |
| 7 | 140799060 | 140813303 | NM_053088    | chr7 | 140806919 | 140808102 |
| 7 | 140786886 | 140796355 | NM_145387    | chr7 | 140795301 | 140795884 |
| 7 | 140703988 | 140713604 | NM_018742    | chr7 | 140706683 | 140707278 |
| 7 | 140690897 | 140701735 | NM_027019    | chr7 | 140699428 | 140700067 |
| 4 | 140686855 | 140696304 | NM_013868    | chr4 | 140695677 | 140696285 |
| 7 | 140609059 | 140617651 | NM_021282    | chr7 | 140616128 | 140616852 |
| 7 | 140549485 | 140557984 | NM_146962    | chr7 | 140550323 | 140551410 |

|   |   |           |           |              |      |           |           |
|---|---|-----------|-----------|--------------|------|-----------|-----------|
|   | 7 | 140512609 | 140521108 | NM_146961    | chr7 | 140518727 | 140519983 |
|   | 6 | 140376577 | 140389004 | NM_144920    | chr6 | 140382361 | 140383087 |
|   | 4 | 140354421 | 140363628 | NM_177867    | chr4 | 140362096 | 140362706 |
|   | 2 | 140350695 | 140359194 | AY495670     | chr2 | 140351974 | 140352730 |
|   | 4 | 140276757 | 140287399 | NM_008546    | chr4 | 140278480 | 140279092 |
|   | 4 | 140276757 | 140287399 | NM_008546    | chr4 | 140276933 | 140277628 |
|   | 4 | 140252976 | 140261503 | NM_029097    | chr4 | 140258957 | 140259699 |
|   | 7 | 140168021 | 140176520 | NM_146956    | chr7 | 140174364 | 140175003 |
|   | 5 | 140154417 | 140162916 | NM_175522    | chr5 | 140161462 | 140162078 |
|   | 7 | 140051589 | 140060088 | NM_001011814 | chr7 | 140057858 | 140058626 |
|   | 5 | 140057687 | 140072725 | NM_144914    | chr5 | 140057817 | 140058757 |
|   | 7 | 139881725 | 139890608 | BC065404     | chr7 | 139884675 | 139885348 |
|   | 7 | 139885049 | 139893586 | NM_133755    | chr7 | 139884675 | 139885348 |
|   | 2 | 139755702 | 139770910 | NM_175225    | chr2 | 139757704 | 139758317 |
|   | 7 | 139679616 | 139694214 | BC056493     | chr7 | 139693282 | 139694284 |
|   | 7 | 139679616 | 139694214 | BC056493     | chr7 | 139691528 | 139692072 |
|   | 7 | 139679616 | 139694214 | BC056493     | chr7 | 139686893 | 139687532 |
|   | 7 | 139508991 | 139517494 | BC060951     | chr7 | 139512486 | 139513352 |
|   | 5 | 139500017 | 139509656 | NM_026269    | chr5 | 139506964 | 139507566 |
|   | 7 | 139431614 | 139440117 | NM_183248    | chr7 | 139433051 | 139433777 |
|   | 4 | 139237603 | 139246102 | NM_173427    | chr4 | 139238024 | 139238881 |
| X |   | 139071173 | 139079672 | NM_007603    | chrX | 139075135 | 139075701 |
|   | 4 | 138919614 | 138928113 | NM_031873    | chr4 | 138920128 | 138921006 |
| X |   | 138906113 | 138914612 | U39738       | chrX | 138906126 | 138906739 |
|   | 4 | 138869287 | 138877786 | NM_183148    | chr4 | 138871358 | 138872026 |
|   | 6 | 138620241 | 138628740 | NM_015777    | chr6 | 138622197 | 138622649 |
|   | 4 | 138615987 | 138630387 | U82832       | chr4 | 138616239 | 138616840 |
|   | 5 | 138500043 | 138515732 | NM_001033416 | chr5 | 138501764 | 138502462 |
|   | 3 | 138457578 | 138467164 | NM_007917    | chr3 | 138462383 | 138463134 |
|   | 5 | 138380238 | 138391484 | NM_019747    | chr5 | 138389138 | 138389746 |
|   | 5 | 138384885 | 138393395 | NM_012002    | chr5 | 138389138 | 138389746 |
|   | 4 | 138233193 | 138251780 | NM_029857    | chr4 | 138249697 | 138250356 |
|   | 4 | 138233193 | 138251780 | NM_029857    | chr4 | 138248110 | 138248629 |
|   | 4 | 138027076 | 138035673 | NM_012045    | chr4 | 138032328 | 138032956 |
|   | 5 | 138011663 | 138020162 | NM_001005426 | chr5 | 138012793 | 138013550 |
|   | 5 | 138011663 | 138020162 | NM_001005426 | chr5 | 138011662 | 138012249 |
|   | 5 | 137969784 | 137979217 | NM_023910    | chr5 | 137978281 | 137979140 |
|   | 2 | 137963934 | 137972737 | NM_145534    | chr2 | 137971522 | 137972274 |
|   | 5 | 137758048 | 137769022 | NM_010312    | chr5 | 137758124 | 137758797 |
|   | 1 | 137609850 | 137618743 | NM_021467    | chr1 | 137617677 | 137618115 |
|   | 5 | 137534922 | 137550029 | NM_031405    | chr5 | 137541382 | 137541976 |
|   | 5 | 137526129 | 137534628 | BC019117     | chr5 | 137527839 | 137528456 |
|   | 5 | 137305019 | 137317421 | NM_001039385 | chr5 | 137312303 | 137313194 |
|   | 3 | 137272489 | 137281029 | NM_016885    | chr3 | 137275682 | 137276300 |
|   | 1 | 137135224 | 137143723 | NM_053106    | chr1 | 137140977 | 137141682 |
|   | 1 | 136981336 | 136989915 | NM_134438    | chr1 | 136983214 | 136984088 |
|   | 6 | 136912719 | 136921240 | NM_023898    | chr6 | 136919303 | 136920060 |

|   |   |           |           |           |      |           |           |
|---|---|-----------|-----------|-----------|------|-----------|-----------|
|   | 2 | 136805232 | 136814136 | NM_013822 | chr2 | 136811190 | 136811815 |
|   | 3 | 136602157 | 136610719 | NM_008913 | chr3 | 136606998 | 136607978 |
|   | 5 | 136584646 | 136593145 | U46684    | chr5 | 136589741 | 136590476 |
|   | 4 | 136543711 | 136552210 | NM_009523 | chr4 | 136550126 | 136550776 |
|   | 1 | 136457092 | 136465591 | NM_009307 | chr1 | 136464490 | 136465168 |
|   | 5 | 136414781 | 136425907 | NM_028070 | chr5 | 136424849 | 136425480 |
|   | 5 | 136418129 | 136426701 | NM_027891 | chr5 | 136424849 | 136425480 |
|   | 5 | 136414781 | 136425907 | NM_028070 | chr5 | 136423947 | 136424571 |
|   | 5 | 136418129 | 136426701 | NM_027891 | chr5 | 136423947 | 136424571 |
|   | 5 | 136395361 | 136403863 | NM_011293 | chr5 | 136395667 | 136396629 |
|   | 1 | 136363594 | 136372093 | NM_183292 | chr1 | 136369945 | 136370507 |
|   | 5 | 136317123 | 136325872 | NM_175309 | chr5 | 136322911 | 136323676 |
| X |   | 136247984 | 136256515 | NM_030181 | chrX | 136249843 | 136250651 |
|   | 4 | 136226393 | 136234894 | NM_007939 | chr4 | 136229022 | 136229624 |
|   | 4 | 136226393 | 136234894 | NM_007939 | chr4 | 136226438 | 136227139 |
| X |   | 136018392 | 136026891 | AF196480  | chrX | 136024869 | 136025481 |
|   | 1 | 135992875 | 136001391 | NM_007695 | chr1 | 135993925 | 135994380 |
|   | 1 | 135893067 | 135901566 | NM_007570 | chr1 | 135897476 | 135898334 |
|   | 5 | 135855153 | 135863676 | NM_019577 | chr5 | 135856795 | 135857508 |
|   | 1 | 135847926 | 135856452 | NM_021355 | chr1 | 135850327 | 135851030 |
|   | 4 | 135689600 | 135698105 | NM_008309 | chr4 | 135690922 | 135691535 |
|   | 4 | 135552145 | 135564368 | NM_009557 | chr4 | 135554304 | 135554973 |
|   | 7 | 135484280 | 135492779 | U36758    | chr7 | 135487430 | 135488139 |
|   | 5 | 135447022 | 135455618 | NM_009745 | chr5 | 135452902 | 135453528 |
|   | 5 | 135385540 | 135394042 | NM_021455 | chr5 | 135391434 | 135392048 |
|   | 7 | 135369824 | 135378764 | NM_011212 | chr7 | 135375833 | 135376773 |
|   | 6 | 135322624 | 135335685 | NM_010128 | chr6 | 135332092 | 135332646 |
|   | 6 | 135322624 | 135335685 | NM_010128 | chr6 | 135329825 | 135330427 |
|   | 6 | 135322624 | 135335685 | NM_010128 | chr6 | 135327997 | 135328672 |
|   | 5 | 135264841 | 135273531 | NM_009902 | chr5 | 135271405 | 135272007 |
|   | 7 | 135242651 | 135251209 | NM_183193 | chr7 | 135248532 | 135249138 |
|   | 4 | 135242171 | 135250696 | NM_011942 | chr4 | 135247983 | 135248897 |
|   | 7 | 135242651 | 135251209 | NM_183193 | chr7 | 135246097 | 135246618 |
|   | 3 | 135212679 | 135221178 | NM_027208 | chr3 | 135219886 | 135220550 |
|   | 5 | 135211000 | 135219520 | NM_024479 | chr5 | 135216831 | 135217496 |
|   | 5 | 135197574 | 135206153 | NM_020504 | chr5 | 135202679 | 135203310 |
|   | 1 | 135185310 | 135193834 | NM_175443 | chr1 | 135191657 | 135192385 |
|   | 1 | 135143421 | 135157272 | NM_178260 | chr1 | 135150999 | 135151618 |
| X |   | 135141192 | 135157524 | NM_016675 | chrX | 135149094 | 135149710 |
|   | 1 | 135131346 | 135139872 | NM_026680 | chr1 | 135137141 | 135137789 |
|   | 6 | 134971313 | 134986276 | NM_026360 | chr6 | 134980802 | 134981472 |
|   | 4 | 134952600 | 134961099 | NM_174851 | chr4 | 134957232 | 134958391 |
|   | 4 | 134760860 | 134772580 | NM_028995 | chr4 | 134767326 | 134768067 |
|   | 4 | 134762063 | 134770562 | NM_030189 | chr4 | 134767326 | 134768067 |
|   | 4 | 134694998 | 134711912 | NM_022980 | chr4 | 134702422 | 134702910 |
|   | 4 | 134667798 | 134681630 | NM_145555 | chr4 | 134677033 | 134677450 |
|   | 1 | 134428892 | 134437391 | BC062092  | chr1 | 134429639 | 134430297 |

|   |   |           |                        |      |           |           |
|---|---|-----------|------------------------|------|-----------|-----------|
|   | 5 | 134421525 | 134430639 BC026208     | chr5 | 134424968 | 134425412 |
|   | 4 | 134418572 | 134427071 AF155880     | chr4 | 134422732 | 134423328 |
|   | 1 | 134327776 | 134337208 NM_029025    | chr1 | 134332569 | 134333160 |
|   | 4 | 134184493 | 134192992 NM_027935    | chr4 | 134186049 | 134186689 |
|   | 1 | 133829422 | 133837921 NM_007923    | chr1 | 133834989 | 133835574 |
|   | 4 | 133802331 | 133819013 NM_029759    | chr4 | 133816285 | 133816976 |
|   | 1 | 133565568 | 133580620 NM_177243    | chr1 | 133566057 | 133566654 |
|   | 7 | 133538314 | 133553638 NM_009479    | chr7 | 133539463 | 133540271 |
|   | 4 | 133507941 | 133523604 NM_024215    | chr4 | 133519651 | 133520579 |
|   | 7 | 133515905 | 133524404 NM_152944    | chr7 | 133517882 | 133518498 |
|   | 4 | 133507941 | 133523604 NM_024215    | chr4 | 133515561 | 133516163 |
|   | 4 | 133496940 | 133505444 NM_177866    | chr4 | 133503977 | 133504644 |
|   | 7 | 133437959 | 133446501 NM_028654    | chr7 | 133445051 | 133445663 |
|   | 4 | 133398330 | 133412213 NM_080559    | chr4 | 133399603 | 133400187 |
|   | 1 | 133101623 | 133113109 NM_019777    | chr1 | 133111955 | 133112795 |
|   | 1 | 133101623 | 133113109 NM_019777    | chr1 | 133103316 | 133103907 |
|   | 1 | 133070206 | 133078724 NM_018750    | chr1 | 133075097 | 133075707 |
|   | 1 | 133025122 | 133033621 AY261333     | chr1 | 133028435 | 133029170 |
|   | 1 | 133025122 | 133033621 AY261333     | chr1 | 133025380 | 133026340 |
|   | 7 | 132917704 | 132926203 BC013333     | chr7 | 132919584 | 132920261 |
|   | 4 | 132903006 | 132916759 NM_001017968 | chr4 | 132910166 | 132910816 |
|   | 3 | 132884960 | 132893597 NM_033525    | chr3 | 132887667 | 132888257 |
|   | 7 | 132861636 | 132870135 AF016508     | chr7 | 132866000 | 132866743 |
|   | 7 | 132861636 | 132870135 AF016508     | chr7 | 132865388 | 132865974 |
|   | 4 | 132850456 | 132858955 NM_133884    | chr4 | 132854606 | 132855321 |
|   | 6 | 132664201 | 132672700 NM_207024    | chr6 | 132666423 | 132667175 |
|   | 1 | 132648297 | 132664418 NM_011082    | chr1 | 132648503 | 132648885 |
|   | 6 | 132616650 | 132625149 NM_207023    | chr6 | 132622907 | 132623651 |
|   | 2 | 132569787 | 132578303 NM_177303    | chr2 | 132572996 | 132573582 |
|   | 6 | 132524669 | 132538034 NM_011174    | chr6 | 132537277 | 132538004 |
|   | 2 | 132499577 | 132513496 NM_175113    | chr2 | 132511646 | 132512244 |
|   | 2 | 132499577 | 132513496 NM_175113    | chr2 | 132507464 | 132508141 |
|   | 4 | 132478452 | 132495461 NM_027152    | chr4 | 132483785 | 132484438 |
|   | 4 | 132481434 | 132490583 NM_008154    | chr4 | 132483785 | 132484438 |
|   | 4 | 132478452 | 132495461 NM_027152    | chr4 | 132482732 | 132483553 |
|   | 4 | 132481434 | 132490583 NM_008154    | chr4 | 132482732 | 132483553 |
| X |   | 132463985 | 132472690 NM_007957    | chrX | 132464608 | 132465365 |
|   | 7 | 132435481 | 132443980 NM_009123    | chr7 | 132435213 | 132435979 |
|   | 2 | 132372403 | 132384223 BC100475     | chr2 | 132373940 | 132374503 |
|   | 1 | 132287731 | 132296286 NM_010016    | chr1 | 132295599 | 132296202 |
|   | 4 | 132240204 | 132248802 NM_010208    | chr4 | 132244859 | 132245515 |
| X |   | 132123586 | 132132505 NM_010297    | chrX | 132127759 | 132128471 |
|   | 7 | 132106443 | 132114942 AF320786     | chr7 | 132114246 | 132114865 |
|   | 7 | 132106443 | 132114942 AF320786     | chr7 | 132112295 | 132113026 |
|   | 2 | 132074342 | 132082841 NM_144944    | chr2 | 132077188 | 132077969 |
|   | 3 | 132016607 | 132025106 NM_020265    | chr3 | 132024162 | 132024869 |
|   | 3 | 132016607 | 132025106 NM_020265    | chr3 | 132021754 | 132022347 |

|   |    |           |           |              |       |           |           |
|---|----|-----------|-----------|--------------|-------|-----------|-----------|
|   | 7  | 131990496 | 131999082 | NM_018867    | chr7  | 131994518 | 131995103 |
|   | 7  | 131798803 | 131807444 | NM_173410    | chr7  | 131805291 | 131806139 |
|   | 2  | 131790501 | 131799000 | AB038145     | chr2  | 131793498 | 131794117 |
|   | 2  | 131790501 | 131799000 | AB038145     | chr2  | 131791186 | 131791865 |
|   | 6  | 131642080 | 131661756 | NM_207019    | chr6  | 131653867 | 131654497 |
|   | 2  | 131636303 | 131646949 | NM_023043    | chr2  | 131645908 | 131646496 |
|   | 4  | 131481634 | 131490332 | NM_145393    | chr4  | 131483912 | 131484536 |
|   | 3  | 131331580 | 131340090 | NM_028943    | chr3  | 131333334 | 131334130 |
|   | 7  | 131328111 | 131354053 | NM_009774    | chr7  | 131333283 | 131333907 |
|   | 4  | 131318484 | 131326983 | BC079875     | chr4  | 131320004 | 131320766 |
|   | 6  | 131256411 | 131264937 | NM_025564    | chr6  | 131259075 | 131259868 |
|   | 8  | 131239328 | 131247882 | NM_008737    | chr8  | 131240798 | 131241246 |
|   | 4  | 131194589 | 131203088 | BC017137     | chr4  | 131196822 | 131197436 |
|   | 4  | 131194589 | 131203088 | BC017137     | chr4  | 131194724 | 131195513 |
|   | 4  | 131163807 | 131172306 | NM_020587    | chr4  | 131166747 | 131167368 |
|   | 7  | 130817224 | 130825723 | NM_007769    | chr7  | 130822516 | 130823328 |
|   | 7  | 130817224 | 130825723 | NM_007769    | chr7  | 130821687 | 130822388 |
|   | 7  | 130721378 | 130729891 | NM_019564    | chr7  | 130727357 | 130727949 |
|   | 2  | 130529052 | 130537551 | NM_029432    | chr2  | 130531298 | 130531899 |
| X |    | 130521479 | 130529978 | BC115763     | chrX  | 130527249 | 130528480 |
|   | 1  | 130417285 | 130425845 | NM_009911    | chr1  | 130424363 | 130424980 |
|   | 2  | 130317580 | 130340285 | NM_197945    | chr2  | 130322451 | 130322801 |
|   | 6  | 130299015 | 130309319 | NM_010648    | chr6  | 130305638 | 130306273 |
|   | 2  | 130261614 | 130270130 | NM_011025    | chr2  | 130267225 | 130268317 |
|   | 4  | 130210461 | 130218993 | NM_010769    | chr4  | 130211769 | 130212247 |
|   | 8  | 130179698 | 130188201 | NM_001013580 | chr8  | 130184128 | 130184730 |
|   | 2  | 130125755 | 130134254 | BC003944     | chr2  | 130130976 | 130131844 |
|   | 2  | 130109806 | 130118329 | NM_030559    | chr2  | 130114744 | 130115353 |
|   | 2  | 130113214 | 130122128 | NM_178762    | chr2  | 130114744 | 130115353 |
|   | 2  | 130109806 | 130118329 | NM_030559    | chr2  | 130111280 | 130111934 |
| X |    | 130090772 | 130103776 | NM_001007578 | chrX  | 130092544 | 130093427 |
|   | 5  | 130033807 | 130042338 | NM_008095    | chr5  | 130036357 | 130037124 |
| X |    | 129941609 | 129950135 | NM_019868    | chrX  | 129948187 | 129948787 |
| X |    | 129944794 | 129953309 | NM_013463    | chrX  | 129948187 | 129948787 |
|   | 1  | 129860058 | 129868584 | NM_009081    | chr1  | 129865658 | 129866781 |
|   | 5  | 129857649 | 129866148 | BC058689     | chr5  | 129858146 | 129858738 |
|   | 3  | 129820679 | 129829343 | NM_026578    | chr3  | 129828022 | 129828702 |
|   | 3  | 129822759 | 129831260 | NM_007686    | chr3  | 129828022 | 129828702 |
|   | 3  | 129820679 | 129829343 | NM_026578    | chr3  | 129823160 | 129823759 |
|   | 3  | 129822759 | 129831260 | NM_007686    | chr3  | 129823160 | 129823759 |
|   | 10 | 129563872 | 129572371 | NM_146677    | chr10 | 129565628 | 129566258 |
|   | 6  | 129551475 | 129561680 | NM_010654    | chr6  | 129551647 | 129552419 |
|   | 10 | 129527505 | 129536004 | NM_146674    | chr10 | 129530896 | 129531575 |
|   | 4  | 129481468 | 129489967 | NM_173071    | chr4  | 129486071 | 129486775 |
|   | 4  | 129481468 | 129489967 | NM_173071    | chr4  | 129484005 | 129484717 |
|   | 5  | 129440780 | 129449281 | NM_013647    | chr5  | 129448203 | 129448903 |
| X |    | 129399563 | 129408198 | NM_133196    | chrX  | 129404370 | 129404962 |

|    |           |           |              |       |           |           |
|----|-----------|-----------|--------------|-------|-----------|-----------|
| 10 | 129346510 | 129355009 | NM_146777    | chr10 | 129350157 | 129350893 |
| 4  | 129316561 | 129325060 | BC087551     | chr4  | 129324443 | 129324968 |
| 4  | 129242064 | 129250601 | NM_011317    | chr4  | 129242815 | 129243427 |
| 2  | 129225544 | 129234043 | NM_177653    | chr2  | 129225951 | 129226556 |
| 4  | 129172556 | 129181055 | NM_008468    | chr4  | 129175554 | 129176314 |
| 10 | 129123992 | 129132491 | NM_146555    | chr10 | 129129312 | 129129963 |
| 6  | 129005520 | 129014054 | NM_181064    | chr6  | 129011371 | 129012020 |
| 6  | 128751622 | 128760214 | NM_008527    | chr6  | 128753486 | 128754076 |
| 4  | 128618563 | 128629607 | NM_010471    | chr4  | 128620667 | 128621267 |
| 10 | 128494422 | 128502921 | NM_146864    | chr10 | 128500909 | 128501508 |
| 10 | 128319052 | 128332473 | NM_134006    | chr10 | 128320883 | 128321753 |
| 10 | 128292168 | 128300667 | NM_010272    | chr10 | 128298288 | 128298889 |
| 7  | 128206806 | 128215320 | NM_026418    | chr7  | 128211680 | 128212268 |
| 10 | 128202529 | 128211124 | NM_028873    | chr10 | 128204836 | 128205551 |
| 10 | 128204820 | 128213319 | NM_178066    | chr10 | 128204836 | 128205551 |
| 4  | 128185099 | 128193598 | BC057571     | chr4  | 128186603 | 128187234 |
| 4  | 128104518 | 128126793 | NM_205823    | chr4  | 128119448 | 128120297 |
| 10 | 128073053 | 128085598 | NM_173733    | chr10 | 128079392 | 128080003 |
| 10 | 128073053 | 128085598 | NM_173733    | chr10 | 128073870 | 128074473 |
| 10 | 127966338 | 127974897 | NM_011119    | chr10 | 127972828 | 127973440 |
| 8  | 127831845 | 127841144 | NM_053207    | chr8  | 127834039 | 127835127 |
| 7  | 127718676 | 127727252 | NM_133351    | chr7  | 127723785 | 127724367 |
| 10 | 127711145 | 127728135 | NM_019953    | chr10 | 127715981 | 127716667 |
| 10 | 127698518 | 127708473 | NM_031252    | chr10 | 127699549 | 127700214 |
| 10 | 127664946 | 127687305 | NM_019963    | chr10 | 127684331 | 127684991 |
| 8  | 127673182 | 127681681 | BC094596     | chr8  | 127680612 | 127681065 |
| 10 | 127622787 | 127659792 | NM_011589    | chr10 | 127653816 | 127654639 |
| 10 | 127622787 | 127659792 | NM_011589    | chr10 | 127642878 | 127643619 |
| 10 | 127591632 | 127600138 | NM_001033264 | chr10 | 127597784 | 127598382 |
| 7  | 127585757 | 127594330 | NM_133943    | chr7  | 127586783 | 127587370 |
| 10 | 127576889 | 127589246 | NM_001039080 | chr10 | 127582805 | 127583400 |
| 8  | 127572216 | 127580715 | BC017545     | chr8  | 127576546 | 127577276 |
| 7  | 127531923 | 127540422 | NM_172748    | chr7  | 127535738 | 127536491 |
| 7  | 127376825 | 127385743 | NM_001033040 | chr7  | 127384041 | 127384682 |
| 7  | 127373928 | 127382431 | NM_172281    | chr7  | 127374227 | 127374858 |
| 2  | 127230327 | 127238908 | NM_178047    | chr2  | 127231343 | 127232052 |
| 10 | 127198103 | 127206632 | NM_009040    | chr10 | 127204844 | 127205436 |
| 7  | 127175785 | 127190767 | NM_030226    | chr7  | 127184678 | 127185651 |
| 10 | 127152143 | 127160747 | NM_007412    | chr10 | 127153746 | 127154457 |
| 7  | 127133963 | 127142532 | NM_146202    | chr7  | 127134606 | 127135325 |
| 6  | 127114057 | 127122667 | NM_009829    | chr6  | 127118995 | 127119614 |
| 7  | 127018591 | 127027090 | NM_146201    | chr7  | 127026739 | 127027613 |
| 7  | 126984636 | 127005616 | NM_144522    | chr7  | 126985037 | 126985986 |
| 2  | 126955680 | 126964198 | NM_139308    | chr2  | 126962417 | 126963047 |
| 10 | 126911927 | 126920426 | BC099496     | chr10 | 126914320 | 126915169 |
| 6  | 126703271 | 126712460 | NM_013568    | chr6  | 126707842 | 126708580 |
| 10 | 126581032 | 126603585 | NM_177615    | chr10 | 126590145 | 126590744 |

|    |           |           |              |       |           |           |
|----|-----------|-----------|--------------|-------|-----------|-----------|
| 10 | 126581032 | 126603585 | NM_177615    | chr10 | 126588414 | 126589081 |
| 2  | 126565059 | 126573671 | NM_021450    | chr2  | 126566580 | 126567219 |
| 2  | 126565059 | 126573671 | NM_021450    | chr2  | 126565833 | 126566228 |
| 7  | 126544774 | 126560820 | NM_011952    | chr7  | 126554001 | 126554590 |
| 6  | 126498473 | 126507056 | NM_145983    | chr6  | 126499638 | 126500432 |
| 7  | 126465006 | 126473505 | NM_133670    | chr7  | 126466322 | 126466936 |
| 10 | 126438881 | 126453698 | NM_010009    | chr10 | 126447254 | 126448132 |
| 7  | 126346339 | 126354838 | U67328       | chr7  | 126353235 | 126353949 |
| 7  | 126291951 | 126300450 | NM_183020    | chr7  | 126296799 | 126297412 |
| 7  | 126291951 | 126300450 | NM_183020    | chr7  | 126294950 | 126295538 |
| 8  | 126212803 | 126221302 | NM_172287    | chr8  | 126220080 | 126220587 |
| 7  | 126203485 | 126211984 | NM_009844    | chr7  | 126205401 | 126206233 |
| 7  | 126185375 | 126193885 | NM_010900    | chr7  | 126187444 | 126188067 |
| 8  | 126096329 | 126104832 | NM_145606    | chr8  | 126099325 | 126099981 |
| 8  | 126066332 | 126074954 | NM_007876    | chr8  | 126074089 | 126074900 |
| 7  | 125989057 | 125997556 | NM_028816    | chr7  | 125990055 | 125990653 |
| 2  | 125720225 | 125728724 | NM_008008    | chr2  | 125722102 | 125722837 |
| 8  | 125655595 | 125674481 | NM_144932    | chr8  | 125669200 | 125669807 |
| 4  | 125644048 | 125653492 | NM_172145    | chr4  | 125651213 | 125651821 |
| 6  | 125506595 | 125521258 | NM_011708    | chr6  | 125516282 | 125516890 |
| 8  | 125494999 | 125503498 | NM_016722    | chr8  | 125502885 | 125503472 |
| 2  | 125471679 | 125480311 | BC095939     | chr2  | 125473273 | 125473898 |
| 6  | 125457813 | 125466379 | NM_007657    | chr6  | 125459992 | 125460560 |
| 3  | 125423702 | 125432201 | NM_022565    | chr3  | 125423825 | 125424427 |
| 5  | 125411380 | 125419879 | AF113001     | chr5  | 125418587 | 125419185 |
| 8  | 125344232 | 125352782 | NM_013914    | chr8  | 125346637 | 125347227 |
| 6  | 125343624 | 125352123 | NM_198604    | chr6  | 125345452 | 125346132 |
| 8  | 125326981 | 125335512 | NM_138656    | chr8  | 125329932 | 125330619 |
| 8  | 125302175 | 125310674 | NM_145834    | chr8  | 125309030 | 125309679 |
| 8  | 125302175 | 125310674 | NM_145834    | chr8  | 125307773 | 125308462 |
| 8  | 125302175 | 125310674 | NM_145834    | chr8  | 125303861 | 125304507 |
| 6  | 125276969 | 125285473 | NM_010736    | chr6  | 125285167 | 125285911 |
| 6  | 125281329 | 125289971 | NM_011324    | chr6  | 125285167 | 125285911 |
| 8  | 125256706 | 125271987 | NM_001029993 | chr8  | 125265138 | 125265776 |
| 7  | 125229824 | 125238339 | NM_029842    | chr7  | 125233419 | 125234015 |
| 6  | 125089213 | 125113919 | NM_178787    | chr6  | 125102878 | 125103515 |
| 6  | 124956339 | 124967654 | NM_175696    | chr6  | 124966551 | 124967634 |
| 2  | 124932699 | 124941675 | NM_023595    | chr2  | 124939698 | 124940405 |
| 2  | 124932699 | 124941675 | NM_023595    | chr2  | 124935965 | 124936479 |
| 6  | 124874759 | 124889550 | NM_008479    | chr6  | 124876096 | 124876950 |
| 8  | 124828458 | 124837002 | NM_007608    | chr8  | 124829734 | 124830355 |
| 8  | 124787923 | 124796422 | NM_001033485 | chr8  | 124794971 | 124795677 |
| 8  | 124791223 | 124799773 | NM_011404    | chr8  | 124794971 | 124795677 |
| 8  | 124765936 | 124774435 | BC013739     | chr8  | 124772953 | 124773579 |
| 6  | 124768294 | 124777059 | NM_013539    | chr6  | 124771874 | 124772465 |
| 8  | 124483284 | 124496574 | BC009020     | chr8  | 124485705 | 124486794 |
| 6  | 124472024 | 124480797 | NM_023143    | chr6  | 124479422 | 124479949 |



|    |           |           |              |       |           |           |
|----|-----------|-----------|--------------|-------|-----------|-----------|
| 6  | 124472024 | 124480797 | NM_023143    | chr6  | 124476723 | 124477446 |
| 6  | 124452753 | 124461268 | NM_181344    | chr6  | 124459413 | 124460045 |
| 8  | 124425432 | 124441966 | NM_029597    | chr8  | 124430301 | 124430917 |
| 8  | 124425432 | 124441966 | NM_029597    | chr8  | 124427731 | 124428360 |
| 4  | 124377203 | 124386658 | NM_177671    | chr4  | 124383930 | 124384523 |
| 6  | 124378157 | 124386686 | NM_008995    | chr6  | 124379584 | 124380258 |
| 4  | 124347079 | 124355586 | NM_153566    | chr4  | 124350551 | 124351371 |
| 4  | 124347079 | 124355586 | NM_153566    | chr4  | 124347959 | 124348565 |
| 3  | 124307059 | 124315630 | NM_146140    | chr3  | 124312929 | 124313529 |
| 4  | 124298876 | 124307413 | NM_008636    | chr4  | 124300148 | 124300754 |
| 4  | 124238176 | 124246681 | NM_008385    | chr4  | 124239997 | 124240913 |
| 9  | 123964372 | 123975648 | NM_009917    | chr9  | 123973313 | 123973985 |
| 14 | 123857750 | 123866355 | NM_207667    | chr14 | 123860497 | 123861151 |
| 9  | 123824707 | 123833206 | NM_007718    | chr9  | 123826539 | 123827322 |
| 8  | 123551546 | 123560089 | NM_010926    | chr8  | 123558042 | 123559199 |
| 9  | 123478588 | 123487174 | NM_011731    | chr9  | 123480745 | 123481350 |
| 3  | 123432935 | 123441532 | NM_008939    | chr3  | 123439672 | 123440448 |
| 3  | 123432935 | 123441532 | NM_008939    | chr3  | 123439051 | 123439656 |
| 4  | 123413736 | 123428790 | NM_017475    | chr4  | 123422402 | 123423161 |
| 5  | 123390537 | 123399246 | NM_175092    | chr5  | 123394814 | 123395448 |
| 1  | 123353410 | 123362011 | NM_010483    | chr1  | 123354984 | 123355732 |
| 9  | 123106988 | 123115487 | NM_001002267 | chr9  | 123113528 | 123114118 |
| 8  | 122984950 | 122993449 | NM_133967    | chr8  | 122986210 | 122986815 |
| 3  | 122973970 | 122982469 | NM_133857    | chr3  | 122979062 | 122979674 |
| 3  | 122973970 | 122982469 | NM_133857    | chr3  | 122977943 | 122978571 |
| 3  | 122973970 | 122982469 | NM_133857    | chr3  | 122976845 | 122977719 |
| 8  | 122971559 | 122980058 | BC013467     | chr8  | 122971866 | 122972451 |
| 8  | 122872453 | 122880952 | NM_030209    | chr8  | 122874811 | 122875588 |
| 9  | 122864024 | 122872523 | NM_025339    | chr9  | 122871310 | 122871910 |
| X  | 122855888 | 122864428 | NM_207250    | chrX  | 122861675 | 122862275 |
| 4  | 122823420 | 122831919 | NM_022033    | chr4  | 122827432 | 122828114 |
| 8  | 122742282 | 122750781 | NM_146219    | chr8  | 122747791 | 122748377 |
| 6  | 122662163 | 122670662 | BC091735     | chr6  | 122663758 | 122664389 |
| 5  | 122626493 | 122635624 | NM_024216    | chr5  | 122635571 | 122636134 |
| 5  | 122630081 | 122638972 | NM_026883    | chr5  | 122635571 | 122636134 |
| 4  | 122612562 | 122621066 | NM_181859    | chr4  | 122619054 | 122619838 |
| 5  | 122609030 | 122617540 | NM_019780    | chr5  | 122617069 | 122617731 |
| 4  | 122601464 | 122609967 | NM_007559    | chr4  | 122607940 | 122608542 |
| 8  | 122546342 | 122554841 | NM_023395    | chr8  | 122549314 | 122550185 |
| 8  | 122488660 | 122497196 | NM_021441    | chr8  | 122488673 | 122489390 |
| 7  | 122456922 | 122465421 | NM_019430    | chr7  | 122462236 | 122463141 |
| 7  | 122418737 | 122427236 | BC048553     | chr7  | 122421560 | 122422591 |
| 5  | 122355596 | 122364104 | NM_010861    | chr5  | 122358768 | 122359353 |
| 9  | 122194314 | 122202942 | NM_026179    | chr9  | 122198279 | 122198953 |
| 1  | 122162128 | 122170627 | NM_207233    | chr1  | 122167711 | 122168309 |
| 6  | 122096247 | 122104746 | NM_001013775 | chr6  | 122099855 | 122100521 |
| 1  | 122098235 | 122106734 | AY214462     | chr1  | 122098339 | 122099241 |

|    |           |           |           |       |           |           |
|----|-----------|-----------|-----------|-------|-----------|-----------|
| 5  | 121779813 | 121788312 | NM_172126 | chr5  | 121780315 | 121781300 |
| 5  | 121717814 | 121726313 | NM_029912 | chr5  | 121723196 | 121723799 |
| 7  | 121650228 | 121658758 | NM_011325 | chr7  | 121655800 | 121656395 |
| 5  | 121603335 | 121619335 | BC051044  | chr5  | 121613716 | 121614608 |
| 5  | 121603335 | 121619335 | BC051044  | chr5  | 121608841 | 121609529 |
| 6  | 121595846 | 121604351 | NM_175628 | chr6  | 121599369 | 121600036 |
| 9  | 121561874 | 121570378 | NM_010918 | chr9  | 121568662 | 121569659 |
| 9  | 121551158 | 121559727 | NM_178677 | chr9  | 121557133 | 121557734 |
| 9  | 121553084 | 121561586 | NM_026794 | chr9  | 121557133 | 121557734 |
| 11 | 121512502 | 121521061 | NM_144797 | chr11 | 121517009 | 121517701 |
| 2  | 121495956 | 121504498 | NM_172673 | chr2  | 121501874 | 121502928 |
| 2  | 121495956 | 121504498 | NM_172673 | chr2  | 121497906 | 121498502 |
| 9  | 121485414 | 121494031 | NM_011703 | chr9  | 121491050 | 121491686 |
| 9  | 121487765 | 121496794 | NM_026915 | chr9  | 121491050 | 121491686 |
| 10 | 121447869 | 121456368 | BC120893  | chr10 | 121448313 | 121448960 |
| 5  | 121267447 | 121276697 | NM_011286 | chr5  | 121268854 | 121269678 |
| 14 | 121236262 | 121244822 | NM_080556 | chr14 | 121241094 | 121241968 |
| 5  | 121169468 | 121177982 | NM_133893 | chr5  | 121176519 | 121177269 |
| 14 | 121097769 | 121106373 | NM_183031 | chr14 | 121105269 | 121105655 |
| 14 | 121048455 | 121056954 | NM_182806 | chr14 | 121052405 | 121052992 |
| 6  | 121044710 | 121053209 | NM_153396 | chr6  | 121051767 | 121052354 |
| 11 | 121042791 | 121051358 | NM_144832 | chr11 | 121047088 | 121047689 |
| 11 | 121047343 | 121055886 | NM_026272 | chr11 | 121047088 | 121047689 |
| 11 | 120956233 | 120964776 | NM_028602 | chr11 | 120961883 | 120962657 |
| 5  | 120953521 | 120962020 | U38252    | chr5  | 120959286 | 120959876 |
| 5  | 120870593 | 120879186 | NM_029096 | chr5  | 120877825 | 120878397 |
| 7  | 120868587 | 120877086 | NM_139310 | chr7  | 120876090 | 120876721 |
| 6  | 120864872 | 120873371 | U75506    | chr6  | 120872030 | 120872654 |
| 5  | 120867387 | 120875886 | NM_028041 | chr5  | 120869491 | 120870835 |
| 5  | 120870593 | 120879186 | NM_029096 | chr5  | 120869491 | 120870835 |
| 11 | 120852998 | 120861508 | NM_009854 | chr11 | 120853003 | 120853752 |
| 10 | 120780175 | 120788674 | BC059047  | chr10 | 120787517 | 120788160 |
| 10 | 120780175 | 120788674 | BC059047  | chr10 | 120786438 | 120786830 |
| 11 | 120608586 | 120618485 | NM_026824 | chr11 | 120608594 | 120609336 |
| 11 | 120540835 | 120554085 | NM_007621 | chr11 | 120548433 | 120549100 |
| 11 | 120471635 | 120480134 | BC025832  | chr11 | 120472956 | 120473545 |
| 4  | 120464251 | 120473257 | AB029329  | chr4  | 120471973 | 120472557 |
| 11 | 120457261 | 120470248 | NM_144795 | chr11 | 120459706 | 120460365 |
| 11 | 120431475 | 120455637 | NM_024229 | chr11 | 120443499 | 120444100 |
| 11 | 120386444 | 120403692 | NM_133796 | chr11 | 120393893 | 120394498 |
| 14 | 120378202 | 120386701 | BC096543  | chr14 | 120379469 | 120380062 |
| 14 | 120378202 | 120386701 | BC096543  | chr14 | 120378588 | 120379307 |
| 11 | 120340879 | 120353264 | NM_008101 | chr11 | 120350954 | 120351551 |
| 11 | 120294746 | 120310508 | NM_013770 | chr11 | 120294751 | 120295391 |
| 11 | 120251259 | 120259758 | NM_199469 | chr11 | 120253409 | 120254017 |
| 11 | 120252783 | 120261282 | NM_145363 | chr11 | 120253409 | 120254017 |
| 11 | 120188018 | 120200836 | NM_027980 | chr11 | 120189120 | 120189752 |

|    |           |           |              |       |           |           |
|----|-----------|-----------|--------------|-------|-----------|-----------|
| 11 | 120171624 | 120180162 | NM_172802    | chr11 | 120175417 | 120176244 |
| 5  | 120089280 | 120098019 | NM_011537    | chr5  | 120093664 | 120094196 |
| 2  | 120064441 | 120072940 | BC024676     | chr2  | 120072131 | 120072737 |
| 14 | 120040415 | 120053526 | NM_023579    | chr14 | 120047159 | 120047812 |
| 9  | 119970486 | 119979455 | NM_011029    | chr9  | 119978800 | 119979408 |
| 11 | 119964865 | 119973417 | NM_024249    | chr11 | 119966175 | 119966830 |
| 7  | 119933922 | 119942439 | NM_011775    | chr7  | 119934903 | 119935515 |
| 11 | 119835127 | 119843626 | AF011908     | chr11 | 119837374 | 119838327 |
| 11 | 119835127 | 119843626 | AF011908     | chr11 | 119835189 | 119835789 |
| 7  | 119681441 | 119693759 | NM_029610    | chr7  | 119691821 | 119692421 |
| 7  | 119684053 | 119692825 | NM_173408    | chr7  | 119691821 | 119692421 |
| 4  | 119590610 | 119599109 | L07911       | chr4  | 119595245 | 119596078 |
| 10 | 119513451 | 119522047 | NM_080446    | chr10 | 119514340 | 119514756 |
| 14 | 119454136 | 119462635 | BC075665     | chr14 | 119457254 | 119457868 |
| 10 | 119390166 | 119398684 | AY255674     | chr10 | 119393605 | 119394266 |
| 2  | 119349603 | 119360239 | NM_027175    | chr2  | 119356519 | 119357399 |
| 2  | 119349603 | 119360239 | NM_027175    | chr2  | 119351586 | 119352232 |
| 7  | 119247917 | 119256421 | NM_025989    | chr7  | 119255587 | 119256232 |
| 6  | 119071150 | 119080173 | L01776       | chr6  | 119076809 | 119077415 |
| 11 | 119038662 | 119047194 | NM_175430    | chr11 | 119039480 | 119040118 |
| 2  | 118960163 | 118968670 | NM_145530    | chr2  | 118960737 | 118961622 |
| 9  | 118895476 | 118914645 | NM_011700    | chr9  | 118908728 | 118909337 |
| 2  | 118894398 | 118902967 | NM_028054    | chr2  | 118902430 | 118903030 |
| 2  | 118897716 | 118906215 | NM_139139    | chr2  | 118902430 | 118903030 |
| 11 | 118899702 | 118908231 | NM_007625    | chr11 | 118900596 | 118901407 |
| 2  | 118853229 | 118868449 | NM_001039223 | chr2  | 118863327 | 118864176 |
| 7  | 118783801 | 118792310 | NM_022420    | chr7  | 118787437 | 118788115 |
| 4  | 118747373 | 118755940 | NM_153105    | chr4  | 118749616 | 118750217 |
| 4  | 118713601 | 118722149 | NM_029198    | chr4  | 118720469 | 118721070 |
| 4  | 118713601 | 118722149 | NM_029198    | chr4  | 118715556 | 118716639 |
| 4  | 118600700 | 118609285 | NM_011400    | chr4  | 118607416 | 118608014 |
| 2  | 118450608 | 118460093 | NM_001001982 | chr2  | 118451847 | 118452517 |
| 4  | 118360715 | 118369214 | NM_001011856 | chr4  | 118361295 | 118362170 |
| 2  | 118348744 | 118357243 | NM_001033254 | chr2  | 118355410 | 118356133 |
| 14 | 118267483 | 118276021 | NM_015820    | chr14 | 118272728 | 118273314 |
| 4  | 118249969 | 118258468 | NM_207152    | chr4  | 118251462 | 118252508 |
| 11 | 118229385 | 118241176 | NM_029502    | chr11 | 118240817 | 118241474 |
| 11 | 118238589 | 118252442 | NM_019959    | chr11 | 118240817 | 118241474 |
| 7  | 118232202 | 118240701 | NM_138649    | chr7  | 118233598 | 118234211 |
| 11 | 118168897 | 118177596 | NM_011594    | chr11 | 118169061 | 118169678 |
| 6  | 118102260 | 118110759 | NM_030165    | chr6  | 118104573 | 118105328 |
| 4  | 118037733 | 118047660 | NM_172383    | chr4  | 118042735 | 118043525 |
| 13 | 118012563 | 118021062 | BC021315     | chr13 | 118013790 | 118014378 |
| 2  | 117945800 | 117954407 | NM_027759    | chr2  | 117953550 | 117954131 |
| 4  | 117901269 | 117911310 | NM_020000    | chr4  | 117907537 | 117908382 |
| 4  | 117868515 | 117878206 | BC059842     | chr4  | 117875687 | 117876357 |
| 4  | 117868515 | 117878206 | BC059842     | chr4  | 117873342 | 117874084 |

|    |           |           |              |       |           |           |
|----|-----------|-----------|--------------|-------|-----------|-----------|
| 6  | 117822696 | 117839330 | NM_001001792 | chr6  | 117836752 | 117837673 |
| 11 | 117807535 | 117823957 | AF411101     | chr11 | 117815254 | 117815666 |
| 11 | 117807535 | 117823957 | AF411101     | chr11 | 117814413 | 117815018 |
| 11 | 117796947 | 117805446 | NM_133757    | chr11 | 117802052 | 117802827 |
| 11 | 117781163 | 117791276 | NM_007707    | chr11 | 117789479 | 117790098 |
| 11 | 117781163 | 117791276 | NM_007707    | chr11 | 117784063 | 117784909 |
| 11 | 117683402 | 117695616 | NM_027919    | chr11 | 117687961 | 117688552 |
| 11 | 117683402 | 117695616 | NM_027919    | chr11 | 117686876 | 117687482 |
| 11 | 117659327 | 117667925 | NM_001012273 | chr11 | 117661063 | 117661609 |
| 11 | 117619767 | 117628276 | NM_009304    | chr11 | 117622183 | 117622964 |
| 5  | 117604940 | 117620913 | NM_021539    | chr5  | 117615345 | 117615923 |
| 11 | 117587959 | 117602729 | NM_145439    | chr11 | 117588502 | 117589361 |
| 11 | 117571152 | 117579651 | BC018495     | chr11 | 117575149 | 117575892 |
| 11 | 117571152 | 117579651 | BC018495     | chr11 | 117573713 | 117574380 |
| 4  | 117377251 | 117395935 | NM_026344    | chr4  | 117394858 | 117395488 |
| 4  | 117377251 | 117395935 | NM_026344    | chr4  | 117393477 | 117394351 |
| 4  | 117377251 | 117395935 | NM_026344    | chr4  | 117387799 | 117389217 |
| 11 | 117294458 | 117302957 | NM_001004166 | chr11 | 117295783 | 117296524 |
| 4  | 117261043 | 117269598 | NM_029416    | chr4  | 117264531 | 117265135 |
| 10 | 117193166 | 117201698 | NM_134010    | chr10 | 117198295 | 117198796 |
| 10 | 117146852 | 117155358 | NM_029875    | chr10 | 117153887 | 117154512 |
| 6  | 117128182 | 117136716 | NM_001012477 | chr6  | 117134320 | 117135257 |
| 14 | 117012578 | 117021077 | NM_029578    | chr14 | 117019925 | 117021016 |
| 14 | 117013505 | 117022017 | NM_021434    | chr14 | 117019925 | 117021016 |
| 11 | 116925328 | 116933838 | NM_028777    | chr11 | 116932976 | 116933644 |
| 12 | 116921729 | 116930341 | NM_011215    | chr12 | 116925739 | 116926606 |
| 12 | 116792928 | 116801427 | BC054797     | chr12 | 116798063 | 116798672 |
| 11 | 116728953 | 116737986 | NM_172948    | chr11 | 116735856 | 116736507 |
| 10 | 116694479 | 116702993 | NM_013590    | chr10 | 116694819 | 116695840 |
| 6  | 116679862 | 116688520 | NM_178768    | chr6  | 116682067 | 116682701 |
| 11 | 116664105 | 116672604 | NM_178620    | chr11 | 116670542 | 116671130 |
| 11 | 116666663 | 116675181 | NM_011358    | chr11 | 116670542 | 116671130 |
| 11 | 116653690 | 116662189 | NM_028865    | chr11 | 116656279 | 116656864 |
| 4  | 116651565 | 116660064 | NM_009098    | chr4  | 116652524 | 116653152 |
| 4  | 116629377 | 116637884 | NM_013807    | chr4  | 116631134 | 116631671 |
| 4  | 116629377 | 116637884 | NM_013807    | chr4  | 116629512 | 116630336 |
| 11 | 116467198 | 116475697 | DQ390337     | chr11 | 116469780 | 116470365 |
| 11 | 116467899 | 116476403 | NM_030206    | chr11 | 116469780 | 116470365 |
| 11 | 116467198 | 116475697 | DQ390337     | chr11 | 116468563 | 116469153 |
| 11 | 116467899 | 116476403 | NM_030206    | chr11 | 116468563 | 116469153 |
| 11 | 116424072 | 116432571 | BC052182     | chr11 | 116427990 | 116428679 |
| 11 | 116403777 | 116414165 | NM_009591    | chr11 | 116412816 | 116413422 |
| 11 | 116403777 | 116414165 | NM_009591    | chr11 | 116411152 | 116411815 |
| 11 | 116394638 | 116403537 | NM_173755    | chr11 | 116396539 | 116397477 |
| 10 | 116374220 | 116383324 | BC010763     | chr10 | 116376750 | 116377444 |
| 11 | 116354729 | 116363228 | BC055067     | chr11 | 116359892 | 116360485 |
| 10 | 116351991 | 116360490 | NM_001003950 | chr10 | 116359190 | 116359796 |

|   |    |           |           |              |       |           |           |
|---|----|-----------|-----------|--------------|-------|-----------|-----------|
|   | 11 | 116354729 | 116363228 | BC055067     | chr11 | 116356326 | 116356933 |
|   | 10 | 116351991 | 116360490 | NM_001003950 | chr10 | 116352861 | 116353550 |
|   | 7  | 116232098 | 116240597 | U52193       | chr7  | 116234228 | 116235002 |
|   | 13 | 116220343 | 116228842 | NM_001033228 | chr13 | 116227190 | 116227957 |
|   | 13 | 116220343 | 116228842 | NM_001033228 | chr13 | 116220925 | 116221574 |
|   | 5  | 116181085 | 116189584 | U39904       | chr5  | 116186247 | 116187066 |
|   | 11 | 116140320 | 116158480 | NM_008240    | chr11 | 116151818 | 116152412 |
|   | 11 | 116120304 | 116128815 | NM_016857    | chr11 | 116121820 | 116122839 |
|   | 4  | 116084954 | 116097161 | NM_001037916 | chr4  | 116096993 | 116097587 |
|   | 4  | 116084954 | 116097161 | NM_001037916 | chr4  | 116095081 | 116096009 |
| X |    | 116038140 | 116047279 | NM_053114    | chrX  | 116043264 | 116043950 |
|   | 11 | 116026093 | 116035129 | NM_027165    | chr11 | 116031018 | 116031609 |
|   | 9  | 116021269 | 116029987 | NM_009371    | chr9  | 116021331 | 116022045 |
|   | 3  | 115993481 | 116002835 | NM_021388    | chr3  | 115998027 | 115998785 |
|   | 3  | 115996767 | 116005383 | NM_023214    | chr3  | 115998027 | 115998785 |
|   | 7  | 115978491 | 115986990 | NM_172743    | chr7  | 115985059 | 115985658 |
|   | 11 | 115962541 | 115971040 | BC055689     | chr11 | 115967328 | 115968190 |
|   | 11 | 115944608 | 115960896 | NM_178802    | chr11 | 115956378 | 115956981 |
|   | 12 | 115953327 | 115961826 | BC110689     | chr12 | 115953396 | 115953869 |
|   | 11 | 115944608 | 115960896 | NM_178802    | chr11 | 115950326 | 115951187 |
|   | 6  | 115919138 | 115927637 | BC019530     | chr6  | 115921447 | 115922190 |
|   | 6  | 115891545 | 115913057 | NM_145383    | chr6  | 115898667 | 115899376 |
|   | 11 | 115817345 | 115825844 | BC080751     | chr11 | 115824646 | 115825370 |
|   | 11 | 115708727 | 115717226 | BC019613     | chr11 | 115711175 | 115712018 |
|   | 11 | 115710268 | 115718897 | NM_183259    | chr11 | 115711175 | 115712018 |
|   | 11 | 115634176 | 115642697 | NM_145438    | chr11 | 115640067 | 115640717 |
|   | 5  | 115559423 | 115567933 | NM_019682    | chr5  | 115559458 | 115560085 |
|   | 4  | 115513114 | 115521858 | NM_010173    | chr4  | 115520570 | 115521155 |
|   | 4  | 115435343 | 115443858 | NM_130865    | chr4  | 115436310 | 115437235 |
|   | 11 | 115426094 | 115435019 | NM_027162    | chr11 | 115430354 | 115431077 |
|   | 5  | 115377813 | 115386312 | NM_007383    | chr5  | 115385184 | 115386117 |
|   | 11 | 115327950 | 115336477 | NM_008258    | chr11 | 115334454 | 115335093 |
|   | 4  | 115331178 | 115339684 | NM_021461    | chr4  | 115333088 | 115333836 |
|   | 11 | 115305405 | 115313943 | NM_015807    | chr11 | 115313235 | 115313898 |
|   | 5  | 115266158 | 115275022 | NM_029012    | chr5  | 115273215 | 115273826 |
|   | 10 | 115215381 | 115224120 | NM_146010    | chr10 | 115222578 | 115223190 |
|   | 10 | 115215381 | 115224120 | NM_146010    | chr10 | 115221846 | 115222454 |
|   | 6  | 115214949 | 115223468 | NM_080639    | chr6  | 115215058 | 115215749 |
|   | 5  | 115178239 | 115186904 | NM_145209    | chr5  | 115184137 | 115184765 |
|   | 9  | 115156620 | 115165119 | NM_024222    | chr9  | 115158937 | 115159551 |
|   | 11 | 115133015 | 115141514 | AB087504     | chr11 | 115138912 | 115139505 |
|   | 11 | 115135492 | 115144008 | NM_176847    | chr11 | 115138912 | 115139505 |
|   | 11 | 115133015 | 115141514 | AB087504     | chr11 | 115135948 | 115136608 |
|   | 11 | 115135492 | 115144008 | NM_176847    | chr11 | 115135948 | 115136608 |
|   | 6  | 115094521 | 115103020 | NM_013681    | chr6  | 115100572 | 115101231 |
|   | 11 | 115080834 | 115089333 | NM_010350    | chr11 | 115083025 | 115083707 |
|   | 12 | 115029341 | 115037840 | BC018315     | chr12 | 115035803 | 115036306 |

|    |           |           |              |       |           |           |
|----|-----------|-----------|--------------|-------|-----------|-----------|
| 10 | 114989391 | 114997890 | NM_010195    | chr10 | 114994855 | 114995563 |
| 10 | 114989391 | 114997890 | NM_010195    | chr10 | 114994166 | 114994839 |
| 11 | 114973431 | 114981992 | NM_012030    | chr11 | 114980794 | 114981502 |
| 5  | 114962873 | 114978459 | NM_029992    | chr5  | 114975853 | 114976648 |
| 6  | 114884872 | 114893384 | NM_177683    | chr6  | 114886377 | 114887157 |
| 11 | 114661631 | 114670644 | NM_147217    | chr11 | 114667239 | 114667846 |
| 5  | 114635606 | 114653956 | NM_054093    | chr5  | 114647654 | 114648737 |
| 5  | 114635606 | 114653956 | NM_054093    | chr5  | 114640193 | 114640782 |
| 5  | 114638971 | 114647485 | NM_026145    | chr5  | 114640193 | 114640782 |
| 5  | 114635606 | 114653956 | NM_054093    | chr5  | 114638891 | 114639640 |
| 5  | 114638971 | 114647485 | NM_026145    | chr5  | 114638891 | 114639640 |
| 4  | 114629410 | 114637909 | NM_001003947 | chr4  | 114631731 | 114632679 |
| 4  | 114492132 | 114500631 | NM_009185    | chr4  | 114498006 | 114498702 |
| 11 | 114478614 | 114494114 | NM_053273    | chr11 | 114484636 | 114485197 |
| 12 | 114440060 | 114448559 | BC028249     | chr12 | 114444730 | 114445322 |
| 5  | 114420517 | 114429016 | NM_133904    | chr5  | 114422144 | 114422763 |
| 12 | 114410160 | 114418669 | BC085312     | chr12 | 114414840 | 114415430 |
| 12 | 114377460 | 114386224 | BC092269     | chr12 | 114382057 | 114383097 |
| 9  | 114211114 | 114219652 | BC020150     | chr9  | 114211386 | 114211999 |
| 10 | 114202975 | 114211474 | NM_146241    | chr10 | 114205875 | 114206369 |
| 10 | 114202975 | 114211474 | NM_146241    | chr10 | 114204180 | 114205036 |
| 13 | 114159930 | 114173266 | NM_027127    | chr13 | 114166114 | 114166717 |
| 6  | 114090836 | 114099335 | NM_172890    | chr6  | 114092806 | 114093406 |
| 5  | 114088933 | 114097474 | NM_009151    | chr5  | 114090797 | 114091691 |
| 5  | 114022099 | 114036320 | NM_025526    | chr5  | 114023672 | 114024232 |
| 5  | 113990802 | 113999309 | NM_001010825 | chr5  | 113998822 | 113999285 |
| 8  | 113937014 | 113945513 | NM_028274    | chr8  | 113941721 | 113942495 |
| 8  | 113881971 | 113897235 | NM_007916    | chr8  | 113893345 | 113893964 |
| 2  | 113890374 | 113898873 | NM_175466    | chr2  | 113892377 | 113892977 |
| 8  | 113837952 | 113846800 | NM_009179    | chr8  | 113844130 | 113844731 |
| 13 | 113775644 | 113784153 | NM_178746    | chr13 | 113781308 | 113781903 |
| 8  | 113690050 | 113698580 | NM_029646    | chr8  | 113692780 | 113693371 |
| 6  | 113682722 | 113691657 | NM_021488    | chr6  | 113683889 | 113684484 |
| 6  | 113629555 | 113638054 | AY162380     | chr6  | 113635636 | 113636372 |
| 12 | 113627733 | 113638285 | NM_153776    | chr12 | 113635517 | 113636298 |
| 6  | 113629555 | 113638054 | AY162380     | chr6  | 113633187 | 113633790 |
| 8  | 113602161 | 113610660 | NM_198625    | chr8  | 113606743 | 113608054 |
| 12 | 113593820 | 113611608 | NM_134041    | chr12 | 113594275 | 113594940 |
| 12 | 113582339 | 113590868 | NM_024223    | chr12 | 113584631 | 113585676 |
| 13 | 113578987 | 113595986 | NM_010560    | chr13 | 113583847 | 113584532 |
| 11 | 113564909 | 113573897 | NM_020006    | chr11 | 113567816 | 113568423 |
| 11 | 113564909 | 113573897 | NM_020006    | chr11 | 113567177 | 113567768 |
| 12 | 113540086 | 113548630 | NM_054081    | chr12 | 113546214 | 113547135 |
| 12 | 113516310 | 113525095 | NM_029381    | chr12 | 113519038 | 113520153 |
| 12 | 113502507 | 113512512 | BC059076     | chr12 | 113510918 | 113511515 |
| 12 | 113502507 | 113512512 | BC059076     | chr12 | 113510010 | 113510608 |
| 12 | 113502507 | 113512512 | BC059076     | chr12 | 113508330 | 113509002 |

|    |           |           |              |       |           |           |
|----|-----------|-----------|--------------|-------|-----------|-----------|
| 11 | 113494500 | 113507095 | NM_177777    | chr11 | 113499671 | 113500281 |
| 11 | 113497495 | 113506151 | NM_138598    | chr11 | 113499671 | 113500281 |
| 6  | 113418261 | 113439850 | NM_145826    | chr6  | 113435279 | 113436013 |
| 12 | 113411202 | 113419701 | BC058112     | chr12 | 113412200 | 113412878 |
| 5  | 113401095 | 113409594 | NM_172884    | chr5  | 113407309 | 113407932 |
| 5  | 113401095 | 113409594 | NM_172884    | chr5  | 113403000 | 113403617 |
| 12 | 113374804 | 113383303 | NM_010588    | chr12 | 113380318 | 113381024 |
| 5  | 113318387 | 113326956 | NM_021352    | chr5  | 113320495 | 113321375 |
| 12 | 113301188 | 113314760 | NM_019925    | chr12 | 113312397 | 113313004 |
| 12 | 113301188 | 113314760 | NM_019925    | chr12 | 113306143 | 113306890 |
| 6  | 113266974 | 113275473 | NM_030178    | chr6  | 113272999 | 113273846 |
| 12 | 113250783 | 113259624 | NM_145450    | chr12 | 113254951 | 113255550 |
| 12 | 113164042 | 113172647 | NM_001024602 | chr12 | 113172053 | 113172631 |
| 6  | 113158609 | 113167161 | NM_177763    | chr6  | 113161319 | 113161873 |
| 12 | 113116892 | 113128084 | NM_009652    | chr12 | 113121027 | 113121617 |
| 12 | 113116892 | 113128084 | NM_009652    | chr12 | 113117485 | 113118088 |
| 12 | 113086397 | 113095219 | NM_013929    | chr12 | 113088839 | 113089487 |
| 12 | 113046465 | 113055067 | BC099931     | chr12 | 113051297 | 113051943 |
| 12 | 113046465 | 113055067 | BC099931     | chr12 | 113049142 | 113049699 |
| 12 | 113046465 | 113055067 | BC099931     | chr12 | 113047741 | 113048456 |
| 12 | 112931275 | 112939922 | NM_177039    | chr12 | 112938108 | 112938909 |
| 8  | 112925984 | 112934869 | NM_011998    | chr8  | 112930645 | 112931240 |
| 8  | 112925984 | 112934869 | NM_011998    | chr8  | 112928758 | 112929440 |
| 13 | 112927362 | 112935861 | NM_011945    | chr13 | 112928009 | 112928620 |
| 13 | 112876542 | 112885041 | L13103       | chr13 | 112878263 | 112878937 |
| 13 | 112876542 | 112885041 | L13103       | chr13 | 112876969 | 112877675 |
| 5  | 112659605 | 112668104 | AF220355     | chr5  | 112663267 | 112664011 |
| 5  | 112577398 | 112587754 | NM_138646    | chr5  | 112581069 | 112581677 |
| 5  | 112580827 | 112589326 | BC125007     | chr5  | 112581069 | 112581677 |
| 5  | 112577398 | 112587754 | NM_138646    | chr5  | 112577634 | 112578330 |
| 12 | 112548664 | 112557172 | BC126962     | chr12 | 112549881 | 112550563 |
| 7  | 112544624 | 112553123 | BC060138     | chr7  | 112544583 | 112545206 |
| 5  | 112538202 | 112546701 | AF049890     | chr5  | 112542953 | 112543794 |
| 12 | 112435484 | 112443983 | BC115831     | chr12 | 112443949 | 112444568 |
| 12 | 112068898 | 112077397 | BC026445     | chr12 | 112072573 | 112073176 |
| 7  | 112011037 | 112019570 | NM_177282    | chr7  | 112012873 | 112013412 |
| 12 | 111931105 | 111939604 | NM_001033248 | chr12 | 111937275 | 111937854 |
| 12 | 111931105 | 111939604 | NM_001033248 | chr12 | 111933630 | 111934509 |
| 1  | 111815531 | 111824030 | AY267034     | chr1  | 111821008 | 111821592 |
| 2  | 111759411 | 111767910 | NM_207151    | chr2  | 111761408 | 111762058 |
| 10 | 111669231 | 111677732 | NM_001025581 | chr10 | 111675862 | 111676591 |
| 8  | 111597773 | 111606272 | NM_007496    | chr8  | 111604819 | 111605603 |
| 2  | 111549090 | 111557589 | NM_146887    | chr2  | 111554860 | 111555572 |
| 5  | 111522512 | 111531924 | BC002262     | chr5  | 111525837 | 111527053 |
| 13 | 111509940 | 111518439 | NM_152804    | chr13 | 111517528 | 111518226 |
| 12 | 111304242 | 111312741 | BC024365     | chr12 | 111311206 | 111312276 |
| 12 | 111254295 | 111262794 | BC039981     | chr12 | 111255762 | 111256456 |

|    |           |           |              |       |           |           |
|----|-----------|-----------|--------------|-------|-----------|-----------|
| 5  | 111074311 | 111082818 | NM_016681    | chr5  | 111075120 | 111075697 |
| 5  | 111017700 | 111026917 | NM_001025561 | chr5  | 111026051 | 111026877 |
| 10 | 110898849 | 110913332 | NM_009344    | chr10 | 110903058 | 110903652 |
| 9  | 110899290 | 110908322 | NM_017466    | chr9  | 110902846 | 110903576 |
| 5  | 110887776 | 110896275 | NM_027156    | chr5  | 110895772 | 110896712 |
| 5  | 110891172 | 110899684 | NM_153570    | chr5  | 110895772 | 110896712 |
| 5  | 110887776 | 110896275 | NM_027156    | chr5  | 110889452 | 110890995 |
| 7  | 110870241 | 110880211 | NM_013507    | chr7  | 110873982 | 110874596 |
| 12 | 110721037 | 110729566 | NM_172119    | chr12 | 110727157 | 110727772 |
| 12 | 110721037 | 110729566 | NM_172119    | chr12 | 110723569 | 110724510 |
| 9  | 110665506 | 110681903 | NM_199471    | chr9  | 110680469 | 110681084 |
| 9  | 110665506 | 110681903 | NM_199471    | chr9  | 110679062 | 110679670 |
| 5  | 110580952 | 110589514 | NM_153400    | chr5  | 110585303 | 110585907 |
| 10 | 110562912 | 110571411 | NM_175489    | chr10 | 110568899 | 110569625 |
| 7  | 110412838 | 110421347 | NM_009627    | chr7  | 110420596 | 110421330 |
| 7  | 110412838 | 110421347 | NM_009627    | chr7  | 110419723 | 110420509 |
| 5  | 110411003 | 110419697 | NM_008146    | chr5  | 110412084 | 110412653 |
| 8  | 110176688 | 110185493 | NM_133957    | chr8  | 110180796 | 110181400 |
| 11 | 110151266 | 110159765 | NM_147219    | chr11 | 110155275 | 110155721 |
| 8  | 110149899 | 110158420 | BC093500     | chr8  | 110154869 | 110155496 |
| 9  | 110082959 | 110093740 | NM_013884    | chr9  | 110091368 | 110091981 |
| 11 | 109981744 | 109990243 | NM_147220    | chr11 | 109983717 | 109984441 |
| 9  | 109958259 | 109972992 | NM_133347    | chr9  | 109963523 | 109964172 |
| 8  | 109940006 | 109948518 | NM_025391    | chr8  | 109941122 | 109941754 |
| 8  | 109818879 | 109827380 | NM_009229    | chr8  | 109825420 | 109826051 |
| 13 | 109785451 | 109793950 | BC084675     | chr13 | 109791377 | 109792218 |
| 7  | 109774905 | 109783431 | NM_153525    | chr7  | 109777024 | 109777612 |
| 8  | 109773588 | 109788722 | NM_145412    | chr8  | 109774630 | 109775233 |
| 7  | 109749100 | 109757599 | NM_021494    | chr7  | 109750013 | 109750611 |
| 7  | 109540925 | 109549440 | NM_020050    | chr7  | 109543303 | 109543951 |
| 2  | 109518219 | 109526718 | BC034862     | chr2  | 109522748 | 109523730 |
| 7  | 109512449 | 109528909 | NM_001040700 | chr7  | 109518454 | 109519317 |
| 2  | 109487275 | 109497807 | NM_001048142 | chr2  | 109493794 | 109494407 |
| 2  | 109469539 | 109480432 | NM_007540    | chr2  | 109474483 | 109475347 |
| 9  | 109336701 | 109345200 | NM_177070    | chr9  | 109340518 | 109341461 |
| 11 | 109299970 | 109308469 | NM_028710    | chr11 | 109307556 | 109308196 |
| 7  | 109296812 | 109305311 | AY572454     | chr7  | 109303186 | 109303689 |
| 11 | 109286800 | 109295686 | NM_001029842 | chr11 | 109293523 | 109294319 |
| 11 | 109172884 | 109181529 | NM_010303    | chr11 | 109178691 | 109179276 |
| 4  | 109168559 | 109177127 | NM_007983    | chr4  | 109175107 | 109175849 |
| 9  | 109089631 | 109098130 | NM_001008428 | chr9  | 109091434 | 109092194 |
| 8  | 109062229 | 109070728 | BC038404     | chr8  | 109065933 | 109066805 |
| 9  | 109050869 | 109059381 | NM_177598    | chr9  | 109052998 | 109054010 |
| 8  | 109023604 | 109032103 | NM_176838    | chr8  | 109026622 | 109027218 |
| 9  | 109016911 | 109025428 | NM_177069    | chr9  | 109019176 | 109019844 |
| 9  | 109016911 | 109025428 | NM_177069    | chr9  | 109017798 | 109018335 |
| 9  | 108928978 | 108945787 | NM_172774    | chr9  | 108931208 | 108931874 |



|    |           |           |              |       |           |           |
|----|-----------|-----------|--------------|-------|-----------|-----------|
| 5  | 108911851 | 108921871 | NM_174870    | chr5  | 108920624 | 108921326 |
| 9  | 108914158 | 108923136 | NM_011637    | chr9  | 108915260 | 108916435 |
| 5  | 108903613 | 108912177 | NM_008325    | chr5  | 108911175 | 108912617 |
| 5  | 108911851 | 108921871 | NM_174870    | chr5  | 108911175 | 108912617 |
| 5  | 108903613 | 108912177 | NM_008325    | chr5  | 108909246 | 108910088 |
| 9  | 108889991 | 108898532 | NM_025858    | chr9  | 108891187 | 108891870 |
| 8  | 108866049 | 108874558 | NM_027960    | chr8  | 108867908 | 108868563 |
| 8  | 108820477 | 108838514 | NM_008490    | chr8  | 108834240 | 108834845 |
| 8  | 108820477 | 108838514 | NM_008490    | chr8  | 108833212 | 108833819 |
| 8  | 108820477 | 108838514 | NM_008490    | chr8  | 108820845 | 108821735 |
| 8  | 108776696 | 108792102 | NM_173432    | chr8  | 108780435 | 108781102 |
| 8  | 108776696 | 108792102 | NM_173432    | chr8  | 108779703 | 108780317 |
| 8  | 108764080 | 108772579 | NM_181594    | chr8  | 108768469 | 108769070 |
| 12 | 108748077 | 108756576 | BC113163     | chr12 | 108756206 | 108756910 |
| 3  | 108713473 | 108721972 | NM_181400    | chr3  | 108714897 | 108715535 |
| 8  | 108710860 | 108719372 | NM_024445    | chr8  | 108714466 | 108715322 |
| 8  | 108713825 | 108722479 | NM_145824    | chr8  | 108714466 | 108715322 |
| 9  | 108705260 | 108714460 | NM_134420    | chr9  | 108713232 | 108713935 |
| 9  | 108705260 | 108714460 | NM_134420    | chr9  | 108705753 | 108706372 |
| 5  | 108695634 | 108704133 | NM_172716    | chr5  | 108701249 | 108701824 |
| 7  | 108683083 | 108691597 | NM_207160    | chr7  | 108690820 | 108691430 |
| 4  | 108613352 | 108621917 | NM_173350    | chr4  | 108620498 | 108621110 |
| 8  | 108584283 | 108599931 | NM_001047436 | chr8  | 108596631 | 108597227 |
| 8  | 108586451 | 108603319 | NM_001012638 | chr8  | 108596631 | 108597227 |
| 8  | 108584283 | 108599931 | NM_001047436 | chr8  | 108591362 | 108591947 |
| 8  | 108586451 | 108603319 | NM_001012638 | chr8  | 108591362 | 108591947 |
| 8  | 108584283 | 108599931 | NM_001047436 | chr8  | 108586468 | 108587608 |
| 8  | 108586451 | 108603319 | NM_001012638 | chr8  | 108586468 | 108587608 |
| 3  | 108505899 | 108515409 | NM_019976    | chr3  | 108514244 | 108514772 |
| 8  | 108500009 | 108512504 | BC030451     | chr8  | 108509963 | 108510865 |
| 8  | 108500009 | 108512504 | BC030451     | chr8  | 108501567 | 108502185 |
| 8  | 108452555 | 108463427 | NM_013477    | chr8  | 108456281 | 108457233 |
| 8  | 108452555 | 108463427 | NM_013477    | chr8  | 108455289 | 108456122 |
| 9  | 108452438 | 108460937 | NM_028944    | chr9  | 108454387 | 108455158 |
| 6  | 108445047 | 108453546 | BC003271     | chr6  | 108447604 | 108448353 |
| 9  | 108422946 | 108442938 | NM_031392    | chr9  | 108434017 | 108434685 |
| 9  | 108412594 | 108430494 | NM_026378    | chr9  | 108429754 | 108430712 |
| 9  | 108422946 | 108442938 | NM_031392    | chr9  | 108429754 | 108430712 |
| 9  | 108412594 | 108430494 | NM_026378    | chr9  | 108427377 | 108427993 |
| 9  | 108422946 | 108442938 | NM_031392    | chr9  | 108427377 | 108427993 |
| 3  | 108352139 | 108360704 | NM_008596    | chr3  | 108352573 | 108353171 |
| 4  | 108329017 | 108337516 | NM_027453    | chr4  | 108331867 | 108332507 |
| 5  | 108300044 | 108308544 | NM_013827    | chr5  | 108306650 | 108307235 |
| 8  | 108234494 | 108243082 | NM_177699    | chr8  | 108237466 | 108238187 |
| 3  | 108202731 | 108211230 | BC016662     | chr3  | 108209665 | 108210709 |
| 3  | 108208032 | 108223623 | NM_008141    | chr3  | 108209665 | 108210709 |
| 3  | 108202731 | 108211230 | BC016662     | chr3  | 108203927 | 108204595 |

|    |           |           |              |       |           |           |
|----|-----------|-----------|--------------|-------|-----------|-----------|
| 8  | 108180792 | 108197237 | NM_172760    | chr8  | 108196626 | 108197218 |
| 8  | 108175680 | 108191227 | NM_028888    | chr8  | 108182243 | 108182848 |
| 8  | 108180792 | 108197237 | NM_172760    | chr8  | 108182243 | 108182848 |
| 6  | 108172895 | 108181394 | NM_010585    | chr6  | 108179251 | 108179946 |
| 8  | 108175680 | 108191227 | NM_028888    | chr8  | 108179100 | 108179836 |
| 6  | 108172895 | 108181394 | NM_010585    | chr6  | 108177788 | 108178404 |
| 6  | 108172895 | 108181394 | NM_010585    | chr6  | 108174754 | 108175347 |
| 8  | 108141448 | 108150280 | NM_178879    | chr8  | 108148040 | 108149309 |
| 8  | 108147859 | 108168075 | NM_030152    | chr8  | 108148040 | 108149309 |
| 8  | 108108328 | 108116933 | NM_145604    | chr8  | 108113890 | 108114501 |
| 7  | 108112352 | 108120851 | NM_146497    | chr7  | 108113882 | 108114516 |
| 6  | 108103777 | 108112283 | NM_018730    | chr6  | 108105653 | 108106648 |
| 3  | 108057244 | 108065801 | NM_026672    | chr3  | 108063269 | 108063883 |
| 6  | 108024823 | 108033331 | BC045208     | chr6  | 108031633 | 108032287 |
| 6  | 108024823 | 108033331 | BC045208     | chr6  | 108028673 | 108029525 |
| 3  | 107999293 | 108007797 | NM_133867    | chr3  | 108003381 | 108004009 |
| 1  | 107993551 | 108003322 | BC059254     | chr1  | 107999922 | 108000574 |
| 7  | 107961420 | 107969919 | NM_146496    | chr7  | 107963200 | 107964080 |
| 9  | 107950053 | 107958567 | NM_146226    | chr9  | 107950531 | 107951117 |
| 9  | 107934903 | 107943402 | NM_032543    | chr9  | 107941242 | 107941861 |
| 7  | 107913939 | 107922438 | NM_146499    | chr7  | 107920005 | 107920617 |
| 9  | 107901391 | 107913811 | NM_177275    | chr9  | 107912447 | 107913394 |
| 9  | 107901391 | 107913811 | NM_177275    | chr9  | 107906669 | 107907478 |
| 4  | 107902146 | 107910646 | NM_024198    | chr4  | 107905715 | 107906313 |
| 3  | 107821934 | 107830565 | NM_145542    | chr3  | 107826969 | 107827719 |
| 9  | 107780570 | 107796525 | NM_026338    | chr9  | 107786028 | 107786822 |
| 8  | 107730197 | 107742350 | NM_145603    | chr8  | 107741413 | 107742019 |
| 8  | 107730197 | 107742350 | NM_145603    | chr8  | 107733622 | 107734563 |
| 3  | 107643575 | 107652074 | NM_172271    | chr3  | 107651279 | 107652010 |
| 8  | 107617137 | 107625665 | NM_133960    | chr8  | 107621947 | 107622563 |
| 8  | 107617137 | 107625665 | NM_133960    | chr8  | 107619442 | 107620111 |
| 7  | 107545993 | 107555173 | NM_177216    | chr7  | 107548799 | 107549408 |
| 9  | 107535194 | 107543716 | NM_008140    | chr9  | 107541876 | 107542475 |
| 11 | 107530067 | 107538566 | NM_007582    | chr11 | 107532226 | 107532833 |
| 6  | 107526975 | 107535474 | BC031122     | chr6  | 107532204 | 107533199 |
| 8  | 107510874 | 107526450 | NM_007663    | chr8  | 107520653 | 107521250 |
| 3  | 107458846 | 107467729 | BC120590     | chr3  | 107460965 | 107461920 |
| 9  | 107452642 | 107473342 | NM_001042779 | chr9  | 107456581 | 107457460 |
| 7  | 107352623 | 107361122 | NM_172907    | chr7  | 107357528 | 107357982 |
| 1  | 107180202 | 107190217 | NM_178779    | chr1  | 107186307 | 107186912 |
| 3  | 107158479 | 107170059 | NM_173787    | chr3  | 107164198 | 107164781 |
| 3  | 107158479 | 107170059 | NM_173787    | chr3  | 107162968 | 107163582 |
| 7  | 106994622 | 107003121 | NM_029660    | chr7  | 106999923 | 107000883 |
| 8  | 106984815 | 106993327 | NM_009868    | chr8  | 106988883 | 106989623 |
| 8  | 106984815 | 106993327 | NM_009868    | chr8  | 106987262 | 106987937 |
| 7  | 106823785 | 106832284 | NM_147034    | chr7  | 106825416 | 106826240 |
| 6  | 106763315 | 106771851 | NM_175357    | chr6  | 106764348 | 106764936 |

|    |           |           |           |       |           |           |
|----|-----------|-----------|-----------|-------|-----------|-----------|
| 9  | 106737469 | 106756047 | NM_029103 | chr9  | 106755566 | 106756023 |
| 9  | 106737469 | 106756047 | NM_029103 | chr9  | 106752776 | 106753437 |
| 4  | 106745830 | 106754365 | NM_028394 | chr4  | 106746309 | 106747252 |
| 7  | 106665393 | 106673892 | NM_147032 | chr7  | 106666038 | 106666625 |
| 11 | 106593057 | 106610584 | NM_007840 | chr11 | 106602696 | 106603282 |
| 11 | 106599365 | 106607875 | NM_177088 | chr11 | 106602696 | 106603282 |
| 11 | 106593057 | 106610584 | NM_007840 | chr11 | 106599915 | 106600845 |
| 11 | 106599365 | 106607875 | NM_177088 | chr11 | 106599915 | 106600845 |
| 1  | 106590076 | 106598886 | NM_011800 | chr1  | 106596984 | 106597753 |
| 12 | 106405278 | 106413865 | NM_011705 | chr12 | 106407702 | 106408298 |
| 9  | 106329410 | 106337926 | NM_145620 | chr9  | 106331744 | 106332542 |
| 9  | 106331762 | 106340752 | NM_145619 | chr9  | 106331744 | 106332542 |
| 9  | 106329410 | 106337926 | NM_145620 | chr9  | 106329728 | 106330366 |
| 9  | 106293830 | 106302337 | NM_025371 | chr9  | 106301735 | 106302705 |
| 9  | 106300762 | 106314552 | NM_021567 | chr9  | 106301735 | 106302705 |
| 9  | 106293830 | 106302337 | NM_025371 | chr9  | 106295117 | 106295744 |
| 9  | 106281632 | 106290139 | NM_009082 | chr9  | 106289139 | 106289745 |
| 4  | 106112671 | 106121170 | NM_183182 | chr4  | 106119584 | 106120174 |
| 4  | 106114381 | 106122880 | NM_177667 | chr4  | 106119584 | 106120174 |
| 9  | 106103458 | 106111957 | NM_020559 | chr9  | 106104664 | 106105449 |
| 3  | 106081554 | 106090098 | NM_027432 | chr3  | 106086284 | 106086880 |
| 3  | 106084784 | 106094304 | NM_009725 | chr3  | 106086284 | 106086880 |
| 11 | 106066244 | 106081775 | NM_008950 | chr11 | 106081771 | 106082388 |
| 11 | 106081213 | 106094798 | NM_031878 | chr11 | 106081771 | 106082388 |
| 4  | 106052970 | 106061581 | NM_053272 | chr4  | 106059376 | 106060042 |
| 12 | 105999141 | 106007678 | NM_007539 | chr12 | 105999874 | 106000479 |
| 4  | 105987553 | 105996215 | NM_080458 | chr4  | 105994941 | 105995628 |
| 3  | 105992914 | 106001462 | NM_027025 | chr3  | 105993234 | 105993846 |
| 12 | 105958222 | 105966721 | NM_009747 | chr12 | 105964256 | 105964915 |
| 13 | 105931572 | 105940140 | NM_026075 | chr13 | 105931564 | 105932111 |
| 3  | 105926893 | 105935392 | NM_145541 | chr3  | 105927627 | 105928246 |
| 11 | 105757738 | 105766277 | NM_007805 | chr11 | 105761008 | 105761738 |
| 12 | 105621257 | 105629764 | NM_009337 | chr12 | 105622853 | 105623581 |
| 7  | 105604473 | 105613434 | NM_010562 | chr7  | 105613170 | 105613781 |
| 7  | 105607813 | 105636302 | NM_009906 | chr7  | 105613170 | 105613781 |
| 7  | 105604473 | 105613434 | NM_010562 | chr7  | 105609558 | 105610147 |
| 7  | 105607813 | 105636302 | NM_009906 | chr7  | 105609558 | 105610147 |
| 7  | 105604473 | 105613434 | NM_010562 | chr7  | 105607522 | 105608137 |
| 7  | 105607813 | 105636302 | NM_009906 | chr7  | 105607522 | 105608137 |
| 12 | 105585910 | 105594594 | NM_013772 | chr12 | 105588019 | 105588856 |
| 12 | 105542083 | 105550598 | NM_013775 | chr12 | 105548425 | 105548982 |
| 12 | 105542083 | 105550598 | NM_013775 | chr12 | 105543981 | 105544557 |
| 7  | 105504777 | 105522297 | NM_018880 | chr7  | 105511504 | 105512356 |
| 7  | 105508269 | 105516860 | NM_019502 | chr7  | 105511504 | 105512356 |
| 2  | 105463735 | 105488220 | NM_013627 | chr2  | 105484108 | 105484727 |
| 2  | 105463735 | 105488220 | NM_013627 | chr2  | 105469139 | 105469739 |
| 12 | 105408360 | 105416859 | NM_172500 | chr12 | 105409229 | 105409957 |

|    |           |           |              |       |           |           |
|----|-----------|-----------|--------------|-------|-----------|-----------|
| 7  | 105293638 | 105302165 | NM_007627    | chr7  | 105299750 | 105300385 |
| 9  | 105247515 | 105258409 | NM_025651    | chr9  | 105253934 | 105254406 |
| 9  | 105248687 | 105259343 | NM_172461    | chr9  | 105253934 | 105254406 |
| 10 | 105242965 | 105251464 | NM_207522    | chr10 | 105248492 | 105249239 |
| 5  | 105220472 | 105235633 | NM_030239    | chr5  | 105223115 | 105223665 |
| 7  | 105201530 | 105217535 | NM_147061    | chr7  | 105210300 | 105211036 |
| 12 | 105130540 | 105139039 | AB081470     | chr12 | 105132969 | 105133580 |
| 7  | 105029041 | 105037540 | NM_207249    | chr7  | 105033063 | 105033754 |
| 7  | 105029041 | 105037540 | NM_207249    | chr7  | 105029587 | 105030271 |
| 7  | 104953539 | 104962038 | NM_147044    | chr7  | 104961083 | 104961716 |
| 3  | 104943781 | 104952298 | NM_008619    | chr3  | 104948997 | 104949555 |
| 11 | 104936577 | 104945076 | NM_172567    | chr11 | 104942086 | 104943096 |
| 7  | 104903021 | 104911520 | NM_147095    | chr7  | 104905764 | 104906382 |
| 7  | 104896288 | 104904787 | NM_001011848 | chr7  | 104896918 | 104897885 |
| 5  | 104713345 | 104721844 | BC020078     | chr5  | 104718002 | 104718610 |
| 4  | 104649279 | 104657791 | NM_080555    | chr4  | 104656679 | 104657290 |
| X  | 104642984 | 104651483 | BC099952     | chrX  | 104645852 | 104646472 |
| 7  | 104538525 | 104555038 | NM_147050    | chr7  | 104550929 | 104551574 |
| 12 | 104496163 | 104504699 | NM_172953    | chr12 | 104501587 | 104502192 |
| 3  | 104493175 | 104501674 | NM_001013805 | chr3  | 104495979 | 104496582 |
| 5  | 104436915 | 104449876 | NM_016779    | chr5  | 104442000 | 104442629 |
| 5  | 104351489 | 104360035 | NM_010097    | chr5  | 104359209 | 104359910 |
| 5  | 104351489 | 104360035 | NM_010097    | chr5  | 104352107 | 104353149 |
| 9  | 104193514 | 104202067 | NM_207668    | chr9  | 104196051 | 104196972 |
| 12 | 104166598 | 104182994 | NM_009246    | chr12 | 104167702 | 104168300 |
| 5  | 104149032 | 104157531 | NM_178741    | chr5  | 104152727 | 104153330 |
| 11 | 104041526 | 104050141 | NM_001038609 | chr11 | 104048165 | 104048762 |
| 7  | 104036138 | 104044637 | NM_172905    | chr7  | 104042578 | 104043600 |
| 7  | 104036138 | 104044637 | NM_172905    | chr7  | 104038587 | 104039199 |
| 11 | 103996417 | 104004943 | NM_199019    | chr11 | 104002526 | 104003227 |
| 3  | 103983353 | 103991926 | NM_008979    | chr3  | 103988834 | 103989442 |
| 9  | 103982779 | 103991278 | NM_145700    | chr9  | 103988630 | 103989565 |
| 7  | 103974102 | 103982601 | NM_147056    | chr7  | 103979053 | 103979659 |
| 9  | 103955641 | 103967364 | AY072796     | chr9  | 103964084 | 103964695 |
| 9  | 103916048 | 103924583 | NM_175324    | chr9  | 103918185 | 103918777 |
| 2  | 103861357 | 103874348 | NM_181858    | chr2  | 103871325 | 103871933 |
| 7  | 103846997 | 103855496 | NM_147118    | chr7  | 103850534 | 103851196 |
| 13 | 103807940 | 103816469 | NM_008533    | chr13 | 103812750 | 103813343 |
| 12 | 103783748 | 103792254 | NM_026580    | chr12 | 103790036 | 103790743 |
| 7  | 103782883 | 103791382 | NM_146959    | chr7  | 103788349 | 103788911 |
| 7  | 103724490 | 103733028 | NM_008221    | chr7  | 103725317 | 103726277 |
| 3  | 103698342 | 103707711 | NM_018800    | chr3  | 103706763 | 103707430 |
| 7  | 103699197 | 103707750 | AF149782     | chr7  | 103701562 | 103702343 |
| 7  | 103699197 | 103707750 | AF149782     | chr7  | 103700072 | 103701194 |
| 5  | 103659481 | 103668302 | NM_011204    | chr5  | 103664053 | 103664909 |
| 5  | 103659481 | 103668302 | NM_011204    | chr5  | 103660552 | 103661167 |
| 7  | 103626974 | 103637171 | NM_147098    | chr7  | 103636488 | 103637133 |

|    |           |           |              |       |           |           |
|----|-----------|-----------|--------------|-------|-----------|-----------|
| 11 | 103584314 | 103592813 | NM_009521    | chr11 | 103588484 | 103589077 |
| 11 | 103450527 | 103460964 | NM_027083    | chr11 | 103455702 | 103456285 |
| 7  | 103319160 | 103327659 | NM_147094    | chr7  | 103325550 | 103326406 |
| 3  | 103294772 | 103303332 | NM_026602    | chr3  | 103300930 | 103301524 |
| 7  | 103255322 | 103263821 | NM_147070    | chr7  | 103257205 | 103258027 |
| 7  | 103205877 | 103214376 | NM_146731    | chr7  | 103212833 | 103213676 |
| 15 | 103135973 | 103144481 | NM_030720    | chr15 | 103136449 | 103137199 |
| 7  | 103123827 | 103132348 | NM_001001559 | chr7  | 103131537 | 103132169 |
| 7  | 103123827 | 103132348 | NM_001001559 | chr7  | 103124397 | 103125006 |
| 12 | 103103401 | 103111919 | NM_172584    | chr12 | 103105085 | 103105692 |
| 7  | 103079683 | 103096040 | NM_146380    | chr7  | 103085650 | 103086317 |
| 5  | 103003098 | 103011597 | BC023344     | chr5  | 103009669 | 103010314 |
| 2  | 102868514 | 102877070 | NM_019735    | chr2  | 102876691 | 102877475 |
| 2  | 102871814 | 102880350 | NM_175094    | chr2  | 102876691 | 102877475 |
| 9  | 102860637 | 102869148 | NM_033314    | chr9  | 102868123 | 102868824 |
| 15 | 102856429 | 102864928 | NM_013553    | chr15 | 102861234 | 102861930 |
| 7  | 102856484 | 102864983 | NM_147115    | chr7  | 102859906 | 102860666 |
| 7  | 102856484 | 102864983 | NM_147115    | chr7  | 102857507 | 102858126 |
| 7  | 102759473 | 102767972 | NM_147088    | chr7  | 102763245 | 102763983 |
| 7  | 102759473 | 102767972 | NM_147088    | chr7  | 102759568 | 102760350 |
| 15 | 102758791 | 102767290 | NM_010463    | chr15 | 102759109 | 102759877 |
| 3  | 102592989 | 102601491 | NM_013609    | chr3  | 102596421 | 102597221 |
| 7  | 102486309 | 102494808 | NM_207621    | chr7  | 102491112 | 102491968 |
| 14 | 102393020 | 102401599 | NM_022886    | chr14 | 102395495 | 102395834 |
| 14 | 102393020 | 102401599 | NM_022886    | chr14 | 102393655 | 102394276 |
| 7  | 102366095 | 102374594 | NM_146840    | chr7  | 102368320 | 102368922 |
| 2  | 102344889 | 102353388 | NM_173749    | chr2  | 102352709 | 102353371 |
| 7  | 102349190 | 102364939 | NM_001011782 | chr7  | 102351212 | 102351936 |
| 15 | 102331105 | 102363059 | NM_009582    | chr15 | 102336315 | 102336960 |
| 15 | 102267454 | 102275969 | NM_144547    | chr15 | 102274965 | 102275571 |
| 2  | 102250132 | 102258631 | NM_010218    | chr2  | 102254813 | 102255461 |
| 11 | 102240571 | 102251552 | NM_008175    | chr11 | 102248724 | 102249460 |
| 9  | 102208397 | 102216896 | NM_173447    | chr9  | 102209693 | 102210342 |
| 15 | 102148150 | 102162271 | NM_021713    | chr15 | 102150643 | 102151288 |
| 7  | 102121418 | 102129917 | NM_019566    | chr7  | 102124084 | 102124688 |
| 4  | 102081799 | 102090298 | BC071259     | chr4  | 102086094 | 102086792 |
| 3  | 102050941 | 102059440 | BC094925     | chr3  | 102057782 | 102058489 |
| 3  | 102050941 | 102059440 | BC094925     | chr3  | 102051352 | 102052016 |
| 13 | 102044663 | 102053168 | BC012687     | chr13 | 102051325 | 102051930 |
| 5  | 101999432 | 102008022 | NM_173370    | chr5  | 102007291 | 102007964 |
| 5  | 101999432 | 102008022 | NM_173370    | chr5  | 102006423 | 102007023 |
| 11 | 101955603 | 101964955 | NM_178053    | chr11 | 101962501 | 101963648 |
| 7  | 101933332 | 101959436 | NM_011644    | chr7  | 101957842 | 101958473 |
| 13 | 101873608 | 101882156 | NM_021886    | chr13 | 101875335 | 101875936 |
| 15 | 101750246 | 101758745 | NM_008475    | chr15 | 101752091 | 101752724 |
| 13 | 101745631 | 101756946 | NM_001015889 | chr13 | 101749541 | 101750523 |
| 13 | 101748743 | 101757316 | NM_011233    | chr13 | 101749541 | 101750523 |

|   |    |           |           |              |       |           |           |
|---|----|-----------|-----------|--------------|-------|-----------|-----------|
|   | 15 | 101388444 | 101396984 | NM_177717    | chr15 | 101392915 | 101393503 |
|   | 15 | 101295512 | 101304011 | NM_010667    | chr15 | 101299339 | 101300097 |
|   | 7  | 101262209 | 101270708 | NM_198096    | chr7  | 101266884 | 101267600 |
|   | 7  | 101245943 | 101261846 | NM_001040112 | chr7  | 101258259 | 101258851 |
|   | 11 | 101235175 | 101243674 | NM_172566    | chr11 | 101240421 | 101241436 |
|   | 11 | 101235175 | 101243674 | NM_172566    | chr11 | 101234734 | 101235445 |
|   | 11 | 101135153 | 101149365 | NM_009675    | chr11 | 101146634 | 101147499 |
|   | 11 | 101135153 | 101149365 | NM_009675    | chr11 | 101140948 | 101141539 |
|   | 11 | 101135153 | 101149365 | NM_009675    | chr11 | 101138964 | 101139553 |
|   | 15 | 101088887 | 101097399 | NM_010444    | chr15 | 101095010 | 101095781 |
|   | 11 | 101056424 | 101079231 | NM_175638    | chr11 | 101062771 | 101063412 |
| X |    | 101057376 | 101065875 | NM_053206    | chrX  | 101061179 | 101061832 |
|   | 15 | 101046241 | 101054777 | NM_019518    | chr15 | 101054259 | 101054734 |
|   | 9  | 100998166 | 101006665 | BC031532     | chr9  | 101004700 | 101005291 |
|   | 15 | 100996159 | 101004658 | NM_007395    | chr15 | 100999886 | 101000487 |
|   | 11 | 100933388 | 100941933 | NM_028933    | chr11 | 100933904 | 100934529 |
|   | 11 | 100880210 | 100905899 | NM_013792    | chr11 | 100901606 | 100902284 |
|   | 11 | 100880210 | 100905899 | NM_013792    | chr11 | 100897182 | 100898330 |
|   | 11 | 100880210 | 100905899 | NM_013792    | chr11 | 100892244 | 100892919 |
| X |    | 100871023 | 100879522 | NM_175358    | chrX  | 100871768 | 100872387 |
|   | 3  | 100811439 | 100820511 | NM_010763    | chr3  | 100813568 | 100814308 |
|   | 15 | 100755463 | 100766850 | AF049617     | chr15 | 100764383 | 100765020 |
|   | 6  | 100564771 | 100573274 | BC094903     | chr6  | 100570525 | 100571439 |
|   | 7  | 100528541 | 100542452 | NM_013746    | chr7  | 100537282 | 100537884 |
|   | 7  | 100405187 | 100413719 | NM_183270    | chr7  | 100411643 | 100412106 |
|   | 5  | 100397391 | 100406110 | NM_182841    | chr5  | 100398837 | 100399490 |
|   | 7  | 100361440 | 100373340 | NM_011671    | chr7  | 100370121 | 100370719 |
|   | 3  | 100285579 | 100294114 | NM_010269    | chr3  | 100288553 | 100289096 |
|   | 3  | 100288951 | 100297450 | NM_175552    | chr3  | 100288553 | 100289096 |
|   | 13 | 100278980 | 100287479 | NM_001004149 | chr13 | 100283704 | 100284302 |
|   | 5  | 100274303 | 100282878 | NM_026421    | chr5  | 100277589 | 100278236 |
|   | 5  | 100276672 | 100285464 | NM_016690    | chr5  | 100277589 | 100278236 |
|   | 11 | 100252014 | 100260516 | NM_025727    | chr11 | 100256802 | 100257452 |
|   | 11 | 100254519 | 100263900 | NM_026561    | chr11 | 100256802 | 100257452 |
|   | 15 | 100237798 | 100246297 | NM_008732    | chr15 | 100244779 | 100245366 |
|   | 15 | 100245227 | 100253726 | NM_001034883 | chr15 | 100244779 | 100245366 |
|   | 11 | 100225647 | 100234336 | NM_010221    | chr11 | 100231815 | 100232399 |
|   | 11 | 100228410 | 100236909 | NM_176830    | chr11 | 100231815 | 100232399 |
| X |    | 100181468 | 100190003 | NM_011276    | chrX  | 100182673 | 100183365 |
|   | 15 | 100175183 | 100183733 | NM_199477    | chr15 | 100179973 | 100180765 |
|   | 7  | 100153603 | 100162102 | NM_177161    | chr7  | 100160100 | 100160831 |
|   | 11 | 100062493 | 100070992 | NM_008470    | chr11 | 100063113 | 100063782 |
|   | 7  | 100046780 | 100057748 | NM_020574    | chr7  | 100049276 | 100050309 |
|   | 13 | 100024042 | 100032541 | NM_178716    | chr13 | 100026338 | 100027003 |
|   | 3  | 100008493 | 100016992 | NM_028892    | chr3  | 100008724 | 100009516 |
|   | 11 | 100006837 | 100015336 | NM_201255    | chr11 | 100008329 | 100009183 |
|   | 13 | 99988607  | 99997199  | NM_001048267 | chr13 | 99991152  | 99991735  |

|   |    |          |                       |       |          |          |
|---|----|----------|-----------------------|-------|----------|----------|
|   | 11 | 99959503 | 99968009 NM_008471    | chr11 | 99963708 | 99964328 |
|   | 11 | 99959503 | 99968009 NM_008471    | chr11 | 99961455 | 99962041 |
|   | 1  | 99923416 | 99931919 NM_013626    | chr1  | 99929553 | 99930156 |
|   | 11 | 99901704 | 99918315 NM_016880    | chr11 | 99904170 | 99904922 |
|   | 11 | 99829786 | 99838302 NM_027983    | chr11 | 99834595 | 99835376 |
|   | 13 | 99790379 | 99800988 NM_001025606 | chr13 | 99792555 | 99793264 |
|   | 15 | 99645607 | 99654106 NM_023063    | chr15 | 99648345 | 99648954 |
|   | 7  | 99635247 | 99643746 NM_146356    | chr7  | 99641408 | 99642001 |
|   | 7  | 99603228 | 99611727 NM_147063    | chr7  | 99603461 | 99604078 |
|   | 15 | 99539621 | 99556250 NM_010271    | chr15 | 99545391 | 99546226 |
|   | 11 | 99394607 | 99457174 NM_001039502 | chr11 | 99450422 | 99451431 |
|   | 10 | 99439512 | 99448139 NM_013598    | chr10 | 99444768 | 99445351 |
|   | 9  | 99416796 | 99425295 NM_001077424 | chr9  | 99423700 | 99424285 |
|   | 11 | 99306695 | 99315214 NM_033373    | chr11 | 99309164 | 99310104 |
|   | 7  | 99306393 | 99314892 BC026428     | chr7  | 99308680 | 99309298 |
|   | 9  | 99232749 | 99241248 BC024389     | chr9  | 99237404 | 99238008 |
|   | 6  | 99229465 | 99237978 NM_053202    | chr6  | 99231677 | 99232346 |
|   | 9  | 99218456 | 99226955 AF043581     | chr9  | 99223813 | 99224458 |
|   | 10 | 99186645 | 99195346 NM_027945    | chr10 | 99191786 | 99192358 |
|   | 11 | 99151545 | 99160057 NM_001033397 | chr11 | 99153185 | 99154130 |
|   | 15 | 99046986 | 99055485 NM_010601    | chr15 | 99047098 | 99047771 |
| X |    | 98999682 | 99009451 BC116811     | chrX  | 99007419 | 99008007 |
| X |    | 98999682 | 99009451 BC116811     | chrX  | 99002037 | 99002641 |
| X |    | 98999682 | 99009451 BC116811     | chrX  | 99001168 | 99001876 |
|   | 15 | 98948612 | 98957378 NM_139140    | chr15 | 98954861 | 98955470 |
| X |    | 98904623 | 98916395 NM_001039116 | chrX  | 98915564 | 98916299 |
|   | 15 | 98759922 | 98768458 NM_011654    | chr15 | 98762428 | 98763098 |
|   | 11 | 98717979 | 98726740 NM_011799    | chr11 | 98718864 | 98719591 |
|   | 8  | 98599042 | 98607541 NM_001035123 | chr8  | 98601845 | 98603372 |
|   | 10 | 98553510 | 98562009 BC119390     | chr10 | 98553624 | 98554328 |
|   | 10 | 98530859 | 98540348 NM_015737    | chr10 | 98538799 | 98539656 |
|   | 11 | 98511403 | 98519949 NM_009971    | chr11 | 98517331 | 98517930 |
|   | 3  | 98461897 | 98470452 NM_172863    | chr3  | 98467264 | 98468194 |
|   | 8  | 98461827 | 98470326 NM_027640    | chr8  | 98463916 | 98464729 |
|   | 5  | 98415171 | 98423670 NM_029947    | chr5  | 98419851 | 98420484 |
|   | 5  | 98415171 | 98423670 NM_029947    | chr5  | 98419012 | 98419614 |
| X |    | 98388592 | 98397091 NM_009094    | chrX  | 98390904 | 98391844 |
|   | 3  | 98359840 | 98368351 NM_008256    | chr3  | 98363136 | 98363748 |
|   | 15 | 98319508 | 98328007 NM_001001807 | chr15 | 98325800 | 98326430 |
|   | 8  | 98321395 | 98329921 NM_008187    | chr8  | 98321715 | 98322719 |
|   | 4  | 98307056 | 98318342 NM_172872    | chr4  | 98309766 | 98310361 |
|   | 9  | 98293905 | 98302419 NM_009034    | chr9  | 98295458 | 98295925 |
|   | 5  | 98268765 | 98277264 NM_133738    | chr5  | 98276599 | 98276942 |
|   | 11 | 98243487 | 98251986 BC027080     | chr11 | 98249167 | 98249756 |
|   | 7  | 98232772 | 98242480 NM_001024619 | chr7  | 98241478 | 98242112 |
|   | 4  | 98212766 | 98221265 AB211064     | chr4  | 98219361 | 98220039 |
|   | 11 | 98141934 | 98151738 NM_010895    | chr11 | 98147027 | 98147655 |

|   |    |          |          |              |       |          |          |
|---|----|----------|----------|--------------|-------|----------|----------|
|   | 11 | 98141934 | 98151738 | NM_010895    | chr11 | 98146141 | 98146758 |
|   | 7  | 98018140 | 98026639 | NM_011010    | chr7  | 98019202 | 98020915 |
|   | 8  | 97997054 | 98005553 | AF013118     | chr8  | 98002734 | 98003208 |
|   | 11 | 97963182 | 97971706 | NM_028149    | chr11 | 97968966 | 97969725 |
|   | 8  | 97964330 | 97974224 | NM_028805    | chr8  | 97965402 | 97966003 |
|   | 11 | 97963182 | 97971706 | NM_028149    | chr11 | 97965152 | 97965921 |
|   | 3  | 97951218 | 97959717 | NM_177145    | chr3  | 97953394 | 97953995 |
|   | 15 | 97912669 | 97927344 | NM_144851    | chr15 | 97920148 | 97920742 |
|   | 16 | 97916170 | 97924669 | NM_023663    | chr16 | 97918128 | 97918900 |
|   | 8  | 97900861 | 97909360 | NM_173036    | chr8  | 97901585 | 97902198 |
|   | 3  | 97850874 | 97859419 | NM_178080    | chr3  | 97852699 | 97853374 |
|   | 3  | 97773652 | 97782151 | BC046620     | chr3  | 97781353 | 97781997 |
|   | 13 | 97769048 | 97777547 | NM_008255    | chr13 | 97775764 | 97776376 |
|   | 8  | 97757764 | 97771431 | NM_053246    | chr8  | 97765029 | 97765646 |
|   | 15 | 97733799 | 97742330 | NM_009504    | chr15 | 97739822 | 97740241 |
|   | 16 | 97657300 | 97665852 | NM_020622    | chr16 | 97663879 | 97664491 |
|   | 3  | 97494085 | 97502584 | NM_146275    | chr3  | 97501738 | 97502335 |
|   | 3  | 97494085 | 97502584 | NM_146275    | chr3  | 97496271 | 97496962 |
| X |    | 97482743 | 97491242 | BC057085     | chrX  | 97489076 | 97489563 |
|   | 1  | 97323003 | 97331504 | BC037146     | chr1  | 97328833 | 97329534 |
|   | 3  | 97290285 | 97298784 | BC019641     | chr3  | 97294480 | 97295483 |
|   | 6  | 97274984 | 97283483 | BC058262     | chr6  | 97276875 | 97277520 |
|   | 11 | 97260250 | 97268749 | NM_021493    | chr11 | 97267549 | 97268307 |
| X |    | 97259855 | 97268358 | NM_031384    | chrX  | 97265363 | 97265943 |
|   | 4  | 97258690 | 97272444 | NM_010905    | chr4  | 97263390 | 97264332 |
|   | 7  | 97201519 | 97210018 | NM_001039039 | chr7  | 97204126 | 97204679 |
|   | 10 | 97116747 | 97125321 | NM_025724    | chr10 | 97122928 | 97123695 |
|   | 10 | 97067756 | 97081872 | NM_007884    | chr10 | 97074885 | 97075590 |
|   | 4  | 97067884 | 97076383 | D90173       | chr4  | 97070736 | 97071343 |
|   | 10 | 96906055 | 96914554 | NM_007833    | chr10 | 96905536 | 96906155 |
|   | 15 | 96881491 | 96889990 | NM_027052    | chr15 | 96882376 | 96882990 |
|   | 11 | 96854960 | 96863459 | NM_027026    | chr11 | 96862958 | 96863660 |
|   | 11 | 96860716 | 96869215 | BC085242     | chr11 | 96862958 | 96863660 |
|   | 11 | 96851676 | 96860175 | NM_026154    | chr11 | 96853202 | 96853759 |
|   | 9  | 96825076 | 96834170 | NM_145134    | chr9  | 96832281 | 96832865 |
|   | 3  | 96807069 | 96815568 | NM_026406    | chr3  | 96808932 | 96809684 |
|   | 11 | 96730072 | 96738571 | NM_030248    | chr11 | 96732299 | 96732966 |
|   | 11 | 96730072 | 96738571 | NM_030248    | chr11 | 96731056 | 96731570 |
|   | 3  | 96709338 | 96723536 | NM_025875    | chr3  | 96720703 | 96721378 |
|   | 3  | 96712725 | 96721225 | NM_175469    | chr3  | 96720703 | 96721378 |
|   | 3  | 96604577 | 96613089 | NM_027126    | chr3  | 96611856 | 96612869 |
|   | 5  | 96444417 | 96456586 | NM_053158    | chr5  | 96456130 | 96456486 |
|   | 3  | 96346239 | 96354738 | NM_033596    | chr3  | 96353788 | 96354516 |
|   | 3  | 96348099 | 96357628 | NM_175666    | chr3  | 96353788 | 96354516 |
|   | 3  | 96322033 | 96331698 | NM_054045    | chr3  | 96329749 | 96330545 |
|   | 3  | 96324902 | 96334589 | BC094041     | chr3  | 96329749 | 96330545 |
|   | 3  | 96322033 | 96331698 | NM_054045    | chr3  | 96324970 | 96325607 |



|   |    |          |                       |       |          |          |
|---|----|----------|-----------------------|-------|----------|----------|
|   | 3  | 96324902 | 96334589 BC094041     | chr3  | 96324970 | 96325607 |
|   | 3  | 96241442 | 96249941 NM_181409    | chr3  | 96248805 | 96249384 |
|   | 16 | 96230078 | 96238639 NM_008251    | chr16 | 96232134 | 96232961 |
|   | 15 | 96192970 | 96201469 BC027180     | chr15 | 96198203 | 96198792 |
| X |    | 96172325 | 96180933 NM_010099    | chrX  | 96177940 | 96178552 |
|   | 12 | 96168509 | 96177008 AY495669     | chr12 | 96174669 | 96175365 |
|   | 11 | 96127255 | 96137328 NM_010459    | chr11 | 96130142 | 96130743 |
|   | 3  | 95987527 | 95996044 NM_011797    | chr3  | 95991067 | 95991817 |
|   | 13 | 95970326 | 95978825 NM_011021    | chr13 | 95975568 | 95976383 |
|   | 11 | 95921196 | 95934052 NM_029755    | chr11 | 95927533 | 95928157 |
|   | 1  | 95880429 | 95888959 NM_008798    | chr1  | 95881751 | 95882387 |
|   | 3  | 95762582 | 95779263 NM_144899    | chr3  | 95764970 | 95765560 |
|   | 3  | 95762582 | 95779263 NM_144899    | chr3  | 95762794 | 95763472 |
|   | 6  | 95681753 | 95690261 NM_011507    | chr6  | 95688368 | 95689055 |
|   | 3  | 95578660 | 95587189 NM_007802    | chr3  | 95586160 | 95586787 |
|   | 9  | 95440980 | 95449606 NM_029620    | chr9  | 95448087 | 95448947 |
|   | 14 | 95399596 | 95408168 NM_053105    | chr14 | 95401070 | 95401676 |
|   | 9  | 95363169 | 95371668 NM_198414    | chr9  | 95369325 | 95370257 |
|   | 16 | 95360449 | 95368995 NM_019664    | chr16 | 95367233 | 95368191 |
|   | 3  | 95324014 | 95332610 NM_001024841 | chr3  | 95325579 | 95326262 |
| X |    | 95239384 | 95247883 NM_199018    | chrX  | 95246035 | 95246641 |
|   | 3  | 95216893 | 95233764 NM_027206    | chr3  | 95225322 | 95226414 |
|   | 3  | 95216893 | 95233764 NM_027206    | chr3  | 95223494 | 95224164 |
|   | 9  | 95213510 | 95222074 NM_018763    | chr9  | 95217298 | 95217845 |
|   | 1  | 95165481 | 95179158 NM_080850    | chr1  | 95167633 | 95168410 |
|   | 1  | 95167260 | 95176550 NM_023200    | chr1  | 95167633 | 95168410 |
|   | 3  | 95054135 | 95062779 NM_175356    | chr3  | 95061146 | 95061778 |
|   | 17 | 95049986 | 95060001 NM_176917    | chr17 | 95054146 | 95054839 |
|   | 1  | 94959651 | 94968181 NM_016702    | chr1  | 94966390 | 94967138 |
|   | 11 | 94930225 | 94938724 NM_010055    | chr11 | 94937915 | 94938615 |
|   | 11 | 94930225 | 94938724 NM_010055    | chr11 | 94932613 | 94933227 |
|   | 1  | 94929729 | 94946657 NM_008440    | chr1  | 94931331 | 94932114 |
|   | 10 | 94929116 | 94937615 NM_026065    | chr10 | 94929943 | 94930551 |
|   | 11 | 94882789 | 94898891 NM_013565    | chr11 | 94892936 | 94893540 |
|   | 11 | 94882789 | 94898891 NM_013565    | chr11 | 94884545 | 94885149 |
|   | 11 | 94854906 | 94863415 NM_133667    | chr11 | 94862576 | 94863231 |
|   | 1  | 94830731 | 94839247 NM_177587    | chr1  | 94838802 | 94839152 |
|   | 11 | 94801302 | 94814663 NM_172261    | chr11 | 94813630 | 94814236 |
|   | 13 | 94597686 | 94606490 NM_021310    | chr13 | 94605720 | 94606326 |
|   | 4  | 94537889 | 94550205 NM_010591    | chr4  | 94548123 | 94548734 |
|   | 16 | 94486710 | 94495209 NM_009441    | chr16 | 94488213 | 94488900 |
|   | 9  | 94473270 | 94481769 NM_177909    | chr9  | 94481375 | 94481716 |
|   | 11 | 94463881 | 94472382 BC096568     | chr11 | 94466084 | 94466673 |
|   | 16 | 94431218 | 94439761 NM_133229    | chr16 | 94434181 | 94434599 |
|   | 1  | 94432245 | 94440744 NM_146491    | chr1  | 94432244 | 94432865 |
|   | 1  | 94412738 | 94429426 NM_146490    | chr1  | 94416703 | 94417301 |
|   | 11 | 94375157 | 94383663 NM_007689    | chr11 | 94381044 | 94381648 |

|   |    |          |          |              |       |          |          |
|---|----|----------|----------|--------------|-------|----------|----------|
|   | 11 | 94375157 | 94383663 | NM_007689    | chr11 | 94379732 | 94380595 |
|   | 10 | 94371767 | 94380266 | NM_018797    | chr10 | 94377362 | 94377968 |
|   | 1  | 94339970 | 94348469 | NM_147039    | chr1  | 94347381 | 94348211 |
|   | 11 | 94287316 | 94307400 | NM_009783    | chr11 | 94303496 | 94304223 |
|   | 11 | 94287316 | 94307400 | NM_009783    | chr11 | 94298168 | 94298972 |
|   | 11 | 94287316 | 94307400 | NM_009783    | chr11 | 94297534 | 94298150 |
|   | 11 | 94049984 | 94064639 | NM_181819    | chr11 | 94063426 | 94063808 |
|   | 10 | 93999056 | 94008717 | BC057202     | chr10 | 94006699 | 94007343 |
|   | 8  | 93954214 | 93962762 | NM_011250    | chr8  | 93960592 | 93961379 |
|   | 16 | 93894878 | 93903377 | NM_019500    | chr16 | 93899127 | 93899771 |
|   | 11 | 93781847 | 93790611 | NM_008704    | chr11 | 93784175 | 93784786 |
|   | 3  | 93599899 | 93608399 | NM_016740    | chr3  | 93603233 | 93604014 |
|   | 13 | 93520649 | 93529359 | NM_175455    | chr13 | 93526527 | 93527146 |
|   | 5  | 93382675 | 93391224 | NM_172713    | chr5  | 93384263 | 93384864 |
|   | 5  | 93328979 | 93337478 | NM_011148    | chr5  | 93333880 | 93334477 |
|   | 10 | 93317059 | 93327001 | NM_019648    | chr10 | 93318742 | 93319587 |
| X |    | 93269315 | 93281146 | NM_001033361 | chrX  | 93276240 | 93276844 |
|   | 10 | 93255354 | 93263853 | NM_183199    | chr10 | 93262724 | 93263334 |
|   | 8  | 93235584 | 93244637 | NM_172913    | chr8  | 93238803 | 93239440 |
|   | 1  | 93175479 | 93186509 | NM_027551    | chr1  | 93178820 | 93179455 |
|   | 1  | 93146481 | 93154980 | NM_001033292 | chr1  | 93152414 | 93153161 |
|   | 1  | 93120451 | 93131283 | NM_016717    | chr1  | 93123008 | 93123598 |
|   | 3  | 92934190 | 92942689 | NM_028628    | chr3  | 92935213 | 92935805 |
|   | 11 | 92908500 | 92918687 | NM_028296    | chr11 | 92915677 | 92916283 |
| X |    | 92910160 | 92918823 | NM_029536    | chrX  | 92915668 | 92916310 |
|   | 1  | 92797371 | 92806026 | NM_008998    | chr1  | 92804526 | 92805203 |
|   | 6  | 92775982 | 92784481 | NM_175209    | chr6  | 92783360 | 92783854 |
|   | 1  | 92739509 | 92748012 | NM_053015    | chr1  | 92743353 | 92743892 |
|   | 3  | 92739830 | 92748329 | NM_026822    | chr3  | 92740890 | 92741460 |
|   | 2  | 92709940 | 92718513 | NM_030725    | chr2  | 92716535 | 92717145 |
|   | 1  | 92605385 | 92613902 | BC057903     | chr1  | 92605810 | 92606463 |
|   | 3  | 92511985 | 92520484 | NM_011477    | chr3  | 92514144 | 92514760 |
|   | 3  | 92512314 | 92520826 | BC031517     | chr3  | 92514144 | 92514760 |
|   | 3  | 92497485 | 92506013 | AY158994     | chr3  | 92504099 | 92504689 |
|   | 1  | 92427385 | 92436412 | NM_133805    | chr1  | 92434388 | 92435105 |
|   | 3  | 92418543 | 92428136 | NM_011470    | chr3  | 92425435 | 92426473 |
|   | 16 | 92207801 | 92216300 | NM_029252    | chr16 | 92208392 | 92210176 |
|   | 16 | 92175248 | 92196646 | NM_134110    | chr16 | 92186677 | 92187264 |
|   | 9  | 92073491 | 92082106 | NM_008880    | chr9  | 92073583 | 92074281 |
|   | 5  | 91960510 | 91969009 | NM_008176    | chr5  | 91964905 | 91965586 |
|   | 5  | 91855303 | 91872240 | NM_011339    | chr5  | 91863682 | 91864543 |
|   | 2  | 91722057 | 91730556 | NM_007699    | chr2  | 91723335 | 91724461 |
|   | 8  | 91523640 | 91532233 | NM_027840    | chr8  | 91527336 | 91528013 |
|   | 16 | 91505353 | 91513852 | NM_138664    | chr16 | 91509560 | 91510601 |
|   | 2  | 91474290 | 91482789 | BC024457     | chr2  | 91476541 | 91477180 |
|   | 2  | 91445043 | 91456546 | NM_146124    | chr2  | 91448510 | 91449010 |
|   | 2  | 91448131 | 91456630 | NM_001033451 | chr2  | 91448510 | 91449010 |

|   |    |          |                       |       |          |          |
|---|----|----------|-----------------------|-------|----------|----------|
|   | 6  | 91374368 | 91382873 NM_009527    | chr6  | 91375062 | 91375988 |
|   | 5  | 91316807 | 91325306 BC039213     | chr5  | 91319531 | 91320120 |
|   | 16 | 91289102 | 91297601 NM_008349    | chr16 | 91292044 | 91292987 |
|   | 9  | 91160877 | 91169376 NM_009576    | chr9  | 91161692 | 91162555 |
|   | 9  | 91160951 | 91169704 NM_009573    | chr9  | 91161692 | 91162555 |
|   | 2  | 91051001 | 91068644 NM_023854    | chr2  | 91063223 | 91063926 |
|   | 1  | 90932457 | 90940956 BC034733     | chr1  | 90937027 | 90937635 |
|   | 2  | 90912983 | 90921508 NM_008653    | chr2  | 90914124 | 90914797 |
|   | 2  | 90891636 | 90900238 NM_011355    | chr2  | 90899847 | 90900192 |
|   | 4  | 90861498 | 90870073 NM_010486    | chr4  | 90862911 | 90863756 |
|   | 16 | 90821173 | 90829685 NM_026502    | chr16 | 90829142 | 90829664 |
|   | 3  | 90806838 | 90815337 NM_207263    | chr3  | 90813402 | 90814000 |
|   | 8  | 90783341 | 90791840 AY147407     | chr8  | 90785055 | 90785815 |
|   | 8  | 90746919 | 90755418 AF188609     | chr8  | 90752780 | 90753364 |
|   | 3  | 90680142 | 90702168 NM_011313    | chr3  | 90682792 | 90683625 |
|   | 6  | 90653833 | 90662332 BC115487     | chr6  | 90656822 | 90657563 |
|   | 5  | 90596628 | 90605127 NM_133192    | chr5  | 90600974 | 90601572 |
|   | 6  | 90564384 | 90572967 NM_027868    | chr6  | 90567107 | 90568015 |
|   | 1  | 90530823 | 90539362 NM_177305    | chr1  | 90537292 | 90537957 |
|   | 1  | 90530823 | 90539362 NM_177305    | chr1  | 90536050 | 90536669 |
| X |    | 90481649 | 90490222 NM_001039060 | chrX  | 90483009 | 90483698 |
|   | 11 | 90451653 | 90460174 NM_011505    | chr11 | 90459056 | 90459781 |
|   | 7  | 90348688 | 90357187 NM_026734    | chr7  | 90351287 | 90351999 |
|   | 1  | 90144135 | 90152634 AY095352     | chr1  | 90149292 | 90149886 |
|   | 3  | 90082073 | 90090624 NM_011826    | chr3  | 90087329 | 90088313 |
|   | 6  | 90066779 | 90075278 NM_053225    | chr6  | 90069334 | 90070402 |
|   | 2  | 90020835 | 90029335 NM_146265    | chr2  | 90022106 | 90023579 |
|   | 6  | 89999846 | 90008345 NM_053218    | chr6  | 90001839 | 90002432 |
|   | 1  | 89959980 | 89972048 NM_145079    | chr1  | 89962443 | 89963073 |
|   | 1  | 89959980 | 89972048 NM_145079    | chr1  | 89960096 | 89960471 |
|   | 3  | 89911297 | 89919824 NM_172530    | chr3  | 89919099 | 89919760 |
|   | 9  | 89910063 | 89918655 NM_001039147 | chr9  | 89917034 | 89917637 |
|   | 3  | 89847854 | 89856512 NM_009602    | chr3  | 89848903 | 89849742 |
|   | 6  | 89833534 | 89842033 NM_053220    | chr6  | 89835300 | 89836012 |
|   | 17 | 89816245 | 89824755 D55720       | chr17 | 89817745 | 89818577 |
|   | 2  | 89788202 | 89796701 NM_146474    | chr2  | 89794816 | 89795345 |
|   | 5  | 89748233 | 89756732 NM_178700    | chr5  | 89753775 | 89754406 |
|   | 6  | 89705928 | 89714485 NM_053230    | chr6  | 89711991 | 89712684 |
|   | 1  | 89649811 | 89658310 BC033599     | chr1  | 89655107 | 89655713 |
|   | 6  | 89558744 | 89567256 NM_025351    | chr6  | 89559398 | 89559956 |
| X |    | 89533241 | 89541864 NM_007492    | chrX  | 89540493 | 89541136 |
|   | 3  | 89495244 | 89510218 NM_177041    | chr3  | 89501021 | 89501722 |
|   | 3  | 89498541 | 89507087 NM_011368    | chr3  | 89501021 | 89501722 |
|   | 3  | 89464685 | 89473444 L35307       | chr3  | 89471217 | 89471809 |
|   | 3  | 89448667 | 89457166 NM_029974    | chr3  | 89456538 | 89457012 |
|   | 3  | 89433387 | 89441937 NM_001037722 | chr3  | 89436363 | 89436743 |
|   | 3  | 89421366 | 89429955 NM_007910    | chr3  | 89429170 | 89429924 |

|    |          |          |           |       |          |          |
|----|----------|----------|-----------|-------|----------|----------|
| 15 | 89415695 | 89425672 | NM_026817 | chr15 | 89417802 | 89418472 |
| 1  | 89409208 | 89417707 | AB048604  | chr1  | 89413664 | 89414263 |
| 2  | 89389453 | 89397952 | NM_146792 | chr2  | 89396502 | 89397281 |
| 18 | 89325620 | 89334287 | NM_178687 | chr18 | 89332715 | 89333334 |
| 3  | 89308979 | 89317532 | NM_013605 | chr3  | 89310160 | 89310748 |
| 15 | 89301380 | 89311192 | NM_009713 | chr15 | 89302815 | 89303451 |
| 3  | 89295134 | 89303659 | NM_013691 | chr3  | 89300163 | 89300801 |
| 3  | 89297333 | 89305853 | NM_013604 | chr3  | 89300163 | 89300801 |
| 3  | 89295134 | 89303659 | NM_013691 | chr3  | 89299213 | 89300007 |
| 3  | 89297333 | 89305853 | NM_013604 | chr3  | 89299213 | 89300007 |
| 3  | 89244753 | 89255460 | NM_007712 | chr3  | 89254227 | 89255096 |
| 15 | 89250615 | 89263666 | NM_009948 | chr15 | 89253937 | 89254518 |
| 15 | 89251290 | 89259789 | NM_176900 | chr15 | 89253937 | 89254518 |
| 3  | 89244753 | 89255460 | NM_007712 | chr3  | 89251158 | 89251786 |
| 11 | 89232539 | 89241038 | NM_172534 | chr11 | 89239253 | 89240110 |
| 3  | 89216069 | 89224568 | NM_013631 | chr3  | 89220304 | 89220939 |
| 6  | 89179221 | 89187720 | NM_201356 | chr6  | 89187033 | 89187667 |
| 15 | 89177539 | 89186046 | NM_025795 | chr15 | 89180414 | 89181110 |
| 15 | 89180752 | 89189384 | NM_178919 | chr15 | 89180414 | 89181110 |
| 15 | 89119775 | 89128274 | BC029156  | chr15 | 89127408 | 89128096 |
| 17 | 89106502 | 89115001 | NM_013523 | chr17 | 89113549 | 89114363 |
| 1  | 89030981 | 89048010 | NM_023314 | chr1  | 89042331 | 89042936 |
| 15 | 89021742 | 89030258 | NM_027081 | chr15 | 89024304 | 89024869 |
| 1  | 89011836 | 89024322 | NM_021600 | chr1  | 89017822 | 89018504 |
| 1  | 89011836 | 89024322 | NM_021600 | chr1  | 89016360 | 89017155 |
| 9  | 88991102 | 88999688 | NM_007534 | chr9  | 88998826 | 88999529 |
| 9  | 88991102 | 88999688 | NM_007534 | chr9  | 88996835 | 88997422 |
| 15 | 88986051 | 89000814 | BC007481  | chr15 | 88994003 | 88995084 |
| 9  | 88991102 | 88999688 | NM_007534 | chr9  | 88993963 | 88994671 |
| 15 | 88986051 | 89000814 | BC007481  | chr15 | 88988146 | 88989225 |
| 15 | 88986051 | 89000814 | BC007481  | chr15 | 88986675 | 88987270 |
| 1  | 88950179 | 88958678 | NM_007432 | chr1  | 88955774 | 88956622 |
| 15 | 88948084 | 88974387 | NM_199198 | chr15 | 88953612 | 88954443 |
| 10 | 88933927 | 88942428 | NM_009108 | chr10 | 88935485 | 88936252 |
| 15 | 88910873 | 88919372 | NM_027905 | chr15 | 88914103 | 88914753 |
| 6  | 88860659 | 88870341 | NM_008564 | chr6  | 88868960 | 88869986 |
| 6  | 88861892 | 88874085 | NM_011906 | chr6  | 88868960 | 88869986 |
| 16 | 88810577 | 88827123 | NM_133359 | chr16 | 88810937 | 88811551 |
| 15 | 88803820 | 88812773 | NM_133241 | chr15 | 88809216 | 88809832 |
| 15 | 88807324 | 88815823 | NM_031260 | chr15 | 88809216 | 88809832 |
| 15 | 88803820 | 88812773 | NM_133241 | chr15 | 88804104 | 88804789 |
| 16 | 88755770 | 88779948 | NM_130870 | chr16 | 88765527 | 88766352 |
| 16 | 88755770 | 88779948 | NM_130870 | chr16 | 88759641 | 88760321 |
| 10 | 88685090 | 88693589 | NM_178773 | chr10 | 88685952 | 88686597 |
| 11 | 88665090 | 88673593 | NM_009648 | chr11 | 88671962 | 88672579 |
| 16 | 88660566 | 88669065 | NM_027170 | chr16 | 88668507 | 88668883 |
| 16 | 88660566 | 88669065 | NM_027170 | chr16 | 88660980 | 88661649 |

|    |          |                       |       |          |          |
|----|----------|-----------------------|-------|----------|----------|
| 15 | 88641412 | 88649960 NM_029720    | chr15 | 88649337 | 88650193 |
| 15 | 88641523 | 88653051 NM_145477    | chr15 | 88649337 | 88650193 |
| 15 | 88601285 | 88609784 BC092524     | chr15 | 88602407 | 88602965 |
| 3  | 88539107 | 88547666 NM_013658    | chr3  | 88546347 | 88547044 |
| 3  | 88493742 | 88502261 NM_025928    | chr3  | 88498258 | 88498849 |
| 12 | 88485798 | 88498389 NM_178657    | chr12 | 88496776 | 88497634 |
| 3  | 88462127 | 88476391 NM_007541    | chr3  | 88469962 | 88470868 |
| 3  | 88462127 | 88476391 NM_007541    | chr3  | 88468264 | 88468850 |
| 12 | 88347041 | 88363880 NM_025507    | chr12 | 88360626 | 88361362 |
| X  | 88266553 | 88275052 NM_010759    | chrX  | 88268493 | 88269461 |
| 1  | 88251500 | 88260012 BC100497     | chr1  | 88258441 | 88259063 |
| 9  | 88234323 | 88242829 NM_172926    | chr9  | 88236162 | 88236775 |
| 1  | 88187947 | 88196626 NM_010880    | chr1  | 88190320 | 88190974 |
| 6  | 88153532 | 88166900 NM_008090    | chr6  | 88165772 | 88166372 |
| 6  | 88153532 | 88166900 NM_008090    | chr6  | 88161646 | 88162362 |
| 12 | 88149811 | 88158364 NM_146036    | chr12 | 88149859 | 88150200 |
| 1  | 88128415 | 88137172 NM_145222    | chr1  | 88135189 | 88136081 |
| 3  | 87999471 | 88010167 NM_026591    | chr3  | 88005372 | 88006053 |
| 2  | 87979718 | 87988217 NM_146531    | chr2  | 87984309 | 87984927 |
| 8  | 87944233 | 87975939 NM_010764    | chr8  | 87974083 | 87974712 |
| 8  | 87968275 | 87977411 NM_026399    | chr8  | 87974083 | 87974712 |
| 8  | 87944233 | 87975939 NM_010764    | chr8  | 87964441 | 87965141 |
| 8  | 87944233 | 87975939 NM_010764    | chr8  | 87954072 | 87954671 |
| 3  | 87926682 | 87935471 NM_001025571 | chr3  | 87934850 | 87935438 |
| 8  | 87901185 | 87921383 NM_145388    | chr8  | 87905840 | 87906442 |
| 12 | 87830514 | 87839013 NM_173735    | chr12 | 87835140 | 87835844 |
| 12 | 87770855 | 87779914 NM_145836    | chr12 | 87778777 | 87779314 |
| 8  | 87719847 | 87750654 NM_009010    | chr8  | 87728504 | 87729322 |
| 8  | 87710378 | 87718928 NM_201227    | chr8  | 87713267 | 87713958 |
| 17 | 87703821 | 87712320 NM_199251    | chr17 | 87706312 | 87706873 |
| 3  | 87698028 | 87707177 NM_001003912 | chr3  | 87704737 | 87705344 |
| 2  | 87627880 | 87636379 NM_001011519 | chr2  | 87632362 | 87633048 |
| 16 | 87582145 | 87590649 NM_007520    | chr16 | 87586748 | 87587487 |
| 8  | 87585562 | 87594441 NM_008535    | chr8  | 87586703 | 87587440 |
| 12 | 87561803 | 87571802 NM_177354    | chr12 | 87562543 | 87563145 |
| 11 | 87547748 | 87556259 NM_009296    | chr11 | 87549944 | 87550591 |
| 3  | 87456375 | 87464893 NM_178165    | chr3  | 87461720 | 87462341 |
| 15 | 87446996 | 87455495 NM_134096    | chr15 | 87451275 | 87451887 |
| 16 | 87436526 | 87445251 NM_144854    | chr16 | 87438149 | 87438785 |
| 2  | 87423304 | 87431803 NM_146658    | chr2  | 87429551 | 87430149 |
| 11 | 87402412 | 87410913 NM_133215    | chr11 | 87404803 | 87405609 |
| 10 | 87390470 | 87398969 M30774       | chr10 | 87392823 | 87393527 |
| 6  | 87388674 | 87397173 NM_009756    | chr6  | 87388800 | 87389463 |
| 17 | 87352670 | 87361176 NM_007589    | chr17 | 87355827 | 87356431 |
| 6  | 87332991 | 87341509 NM_025467    | chr6  | 87339146 | 87340193 |
| 6  | 87298850 | 87307354 NM_054041    | chr6  | 87303376 | 87304232 |
| 10 | 87282867 | 87297027 NM_184052    | chr10 | 87296453 | 87297629 |

|    |          |          |              |       |          |          |
|----|----------|----------|--------------|-------|----------|----------|
| 12 | 87244220 | 87252719 | NM_011934    | chr12 | 87250810 | 87251563 |
| 12 | 87244220 | 87252719 | NM_011934    | chr12 | 87247953 | 87248568 |
| 12 | 87244220 | 87252719 | NM_011934    | chr12 | 87244513 | 87245118 |
| 8  | 87137316 | 87153431 | NM_026423    | chr8  | 87148455 | 87149131 |
| 5  | 87137533 | 87146032 | NM_007683    | chr5  | 87139151 | 87139767 |
| 7  | 87116556 | 87125058 | NM_015760    | chr7  | 87117962 | 87118611 |
| 3  | 87082732 | 87091264 | NM_007639    | chr3  | 87084347 | 87085080 |
| 2  | 87046778 | 87055277 | NM_146297    | chr2  | 87049989 | 87050617 |
| 8  | 87024394 | 87043858 | NM_145970    | chr8  | 87033568 | 87034162 |
| 8  | 87032264 | 87040763 | NM_029045    | chr8  | 87033568 | 87034162 |
| 8  | 87024394 | 87043858 | NM_145970    | chr8  | 87026817 | 87027518 |
| 8  | 86930148 | 86941084 | NM_016671    | chr8  | 86930287 | 86930940 |
| 11 | 86807330 | 86815957 | NM_001005341 | chr11 | 86809240 | 86809866 |
| 6  | 86756691 | 86765190 | NM_013471    | chr6  | 86757420 | 86758576 |
| 2  | 86721870 | 86730369 | NM_146845    | chr2  | 86725246 | 86725875 |
| 12 | 86707779 | 86718051 | BC035276     | chr12 | 86713815 | 86714434 |
| 12 | 86711149 | 86719758 | NM_021446    | chr12 | 86713815 | 86714434 |
| 8  | 86536783 | 86559467 | NM_013641    | chr8  | 86548046 | 86548654 |
| 6  | 86489081 | 86497799 | NM_011865    | chr6  | 86491925 | 86492880 |
| 12 | 86482208 | 86491620 | NM_030887    | chr12 | 86486027 | 86486708 |
| 9  | 86362771 | 86371270 | NM_027100    | chr9  | 86370448 | 86371271 |
| 9  | 86366046 | 86374545 | NM_028352    | chr9  | 86370448 | 86371271 |
| 4  | 86339645 | 86348194 | NM_139306    | chr4  | 86345746 | 86346375 |
| 4  | 86326099 | 86334598 | NM_009096    | chr4  | 86327088 | 86327700 |
| 12 | 86261321 | 86269826 | NM_026775    | chr12 | 86269146 | 86269492 |
| 12 | 86171756 | 86180279 | NM_172414    | chr12 | 86177523 | 86178116 |
| 10 | 86129611 | 86145216 | NM_001003910 | chr10 | 86135845 | 86136444 |
| 10 | 86132676 | 86141249 | NM_011631    | chr10 | 86135845 | 86136444 |
| 12 | 86102584 | 86111115 | NM_145445    | chr12 | 86105371 | 86106379 |
| 12 | 86063889 | 86072388 | NM_008827    | chr12 | 86065044 | 86065636 |
| 15 | 86060915 | 86069414 | BC023106     | chr15 | 86064272 | 86065192 |
| 6  | 85976825 | 85985324 | NM_012013    | chr6  | 85984853 | 85985290 |
| 12 | 85948095 | 85956594 | BC055465     | chr12 | 85950617 | 85951214 |
| 6  | 85915489 | 85923988 | BC028640     | chr6  | 85918933 | 85919758 |
| 6  | 85868019 | 85876518 | NM_029331    | chr6  | 85873712 | 85874319 |
| 15 | 85859044 | 85867543 | NM_009886    | chr15 | 85866417 | 85867432 |
| 2  | 85841323 | 85849822 | NM_001011872 | chr2  | 85848905 | 85849499 |
| 12 | 85837812 | 85846311 | NM_178065    | chr12 | 85840803 | 85841521 |
| 4  | 85808015 | 85816523 | NM_172542    | chr4  | 85812231 | 85812845 |
| 6  | 85803527 | 85812026 | AB024935     | chr6  | 85807018 | 85807618 |
| 6  | 85794994 | 85803740 | NM_023455    | chr6  | 85801270 | 85802311 |
| 2  | 85778681 | 85795157 | NM_001011759 | chr2  | 85791202 | 85791792 |
| 6  | 85773022 | 85781521 | NM_053097    | chr6  | 85773012 | 85773600 |
| 11 | 85700258 | 85708757 | NM_011536    | chr11 | 85706132 | 85706723 |
| 15 | 85681511 | 85690241 | NM_013882    | chr15 | 85681747 | 85682391 |
| 12 | 85657018 | 85665524 | BC022589     | chr12 | 85661952 | 85662548 |
| 12 | 85660163 | 85668860 | NM_023409    | chr12 | 85661952 | 85662548 |

|    |          |          |              |       |          |          |
|----|----------|----------|--------------|-------|----------|----------|
| 15 | 85647000 | 85655499 | NM_011105    | chr15 | 85651046 | 85651510 |
| 15 | 85636316 | 85644815 | NM_197998    | chr15 | 85637968 | 85638565 |
| 12 | 85504619 | 85513161 | NM_008992    | chr12 | 85510810 | 85511402 |
| 18 | 85063218 | 85071717 | NM_015798    | chr18 | 85069699 | 85070456 |
| 12 | 85035488 | 85044174 | NM_027438    | chr12 | 85041764 | 85042363 |
| 12 | 85035488 | 85044174 | NM_027438    | chr12 | 85036364 | 85037407 |
| 10 | 85022210 | 85030709 | NM_001017525 | chr10 | 85029567 | 85030159 |
| 15 | 84838907 | 84847457 | NM_023478    | chr15 | 84843398 | 84844188 |
| 15 | 84838907 | 84847457 | NM_023478    | chr15 | 84839814 | 84840402 |
| 18 | 84781718 | 84790277 | NM_177450    | chr18 | 84785081 | 84785778 |
| 12 | 84763979 | 84772564 | NM_010949    | chr12 | 84766045 | 84766615 |
| 11 | 84730042 | 84738551 | NM_001005223 | chr11 | 84736267 | 84736909 |
| 11 | 84693874 | 84702480 | NM_027388    | chr11 | 84699515 | 84700239 |
| 2  | 84685032 | 84693531 | NM_199223    | chr2  | 84688909 | 84689401 |
| 12 | 84665722 | 84674221 | BC005747     | chr12 | 84666568 | 84667275 |
| 11 | 84642660 | 84651181 | NM_177564    | chr11 | 84644894 | 84645487 |
| 2  | 84634278 | 84643762 | AB103034     | chr2  | 84640463 | 84641092 |
| 11 | 84633211 | 84641710 | NM_145433    | chr11 | 84635753 | 84636169 |
| 5  | 84427170 | 84435756 | NM_153801    | chr5  | 84427258 | 84427904 |
| 3  | 84388115 | 84396614 | AF220017     | chr3  | 84390648 | 84391260 |
| 15 | 84379517 | 84391589 | NM_177630    | chr15 | 84383748 | 84384801 |
| 15 | 84379517 | 84391589 | NM_177630    | chr15 | 84382549 | 84383217 |
| 18 | 84216351 | 84224850 | NM_146090    | chr18 | 84221065 | 84222039 |
| 3  | 84123565 | 84132088 | NM_172681    | chr3  | 84124743 | 84125571 |
| 7  | 84025579 | 84034078 | NM_133722    | chr7  | 84029070 | 84029699 |
| 7  | 84025579 | 84034078 | NM_133722    | chr7  | 84028052 | 84028642 |
| 13 | 83975532 | 83984031 | NM_025282    | chr13 | 83981654 | 83982271 |
| 11 | 83882018 | 83890774 | NM_019819    | chr11 | 83883449 | 83884422 |
| 7  | 83818022 | 83833782 | BC056981     | chr7  | 83828567 | 83829280 |
| 15 | 83773242 | 83781741 | BC056955     | chr15 | 83779480 | 83780167 |
| 8  | 83773077 | 83782225 | NM_021356    | chr8  | 83773805 | 83774420 |
| 6  | 83738915 | 83747417 | NM_009357    | chr6  | 83739046 | 83739888 |
| 7  | 83668512 | 83677018 | NM_029335    | chr7  | 83676551 | 83677000 |
| 2  | 83607567 | 83616066 | NM_175514    | chr2  | 83614981 | 83615858 |
| 15 | 83601789 | 83610288 | NM_172610    | chr15 | 83609125 | 83609734 |
| 12 | 83529886 | 83538681 | NM_015812    | chr12 | 83536109 | 83536948 |
| 2  | 83519354 | 83527853 | NM_008402    | chr2  | 83523929 | 83524524 |
| 2  | 83454849 | 83463348 | BC028787     | chr2  | 83455459 | 83456162 |
| 1  | 83284691 | 83293190 | NM_172430    | chr1  | 83288839 | 83289429 |
| 1  | 83284691 | 83293190 | NM_172430    | chr1  | 83286637 | 83287421 |
| 1  | 83284691 | 83293190 | NM_172430    | chr1  | 83285690 | 83286332 |
| 15 | 83175441 | 83184013 | NM_025445    | chr15 | 83179564 | 83180513 |
| 18 | 83130598 | 83139097 | BC023380     | chr18 | 83135449 | 83136372 |
| 3  | 83106081 | 83121129 | NM_010196    | chr3  | 83106164 | 83106836 |
| 6  | 83084544 | 83096733 | NM_016757    | chr6  | 83089688 | 83090274 |
| 6  | 83062783 | 83083663 | NM_020619    | chr6  | 83068923 | 83069558 |
| 1  | 83032786 | 83041285 | NM_027725    | chr1  | 83034023 | 83034617 |

|    |          |          |              |       |          |          |
|----|----------|----------|--------------|-------|----------|----------|
| 11 | 82985381 | 82995297 | NM_011410    | chr11 | 82989087 | 82989772 |
| 11 | 82985381 | 82995297 | NM_011410    | chr11 | 82986523 | 82987677 |
| 15 | 82948030 | 82956529 | NM_029101    | chr15 | 82955528 | 82956124 |
| 11 | 82875307 | 82883806 | NM_011408    | chr11 | 82881192 | 82881830 |
| 11 | 82875307 | 82883806 | NM_011408    | chr11 | 82880513 | 82881177 |
| 11 | 82805416 | 82814025 | NM_172796    | chr11 | 82806068 | 82807019 |
| 1  | 82712507 | 82721029 | NM_010472    | chr1  | 82718305 | 82718913 |
| 1  | 82712507 | 82721029 | NM_010472    | chr1  | 82715303 | 82715996 |
| 11 | 82702319 | 82710839 | NM_030224    | chr11 | 82703833 | 82704489 |
| 11 | 82704285 | 82712806 | NM_011235    | chr11 | 82703833 | 82704489 |
| 11 | 82684440 | 82692939 | NM_001007465 | chr11 | 82688949 | 82689420 |
| 18 | 82682891 | 82691473 | NM_001025251 | chr18 | 82683323 | 82683936 |
| 12 | 82507764 | 82519850 | NM_027213    | chr12 | 82507803 | 82508770 |
| 15 | 82467292 | 82475791 | NM_133695    | chr15 | 82469259 | 82470095 |
| 1  | 82460000 | 82468499 | NM_007734    | chr1  | 82464545 | 82465214 |
| 1  | 82463317 | 82471816 | NM_007735    | chr1  | 82464545 | 82465214 |
| 8  | 82292913 | 82301540 | NM_008539    | chr8  | 82300404 | 82301003 |
| X  | 82290918 | 82299417 | NM_028554    | chrX  | 82293299 | 82293972 |
| 10 | 82282978 | 82298957 | NM_001042514 | chr10 | 82293037 | 82293637 |
| 10 | 82282978 | 82298957 | NM_001042514 | chr10 | 82283901 | 82284484 |
| 8  | 82265799 | 82274298 | U58992       | chr8  | 82266496 | 82267384 |
| 15 | 82232437 | 82240946 | NM_010005    | chr15 | 82234443 | 82235295 |
| 15 | 82201286 | 82213926 | NM_019823    | chr15 | 82209621 | 82210077 |
| 10 | 82191348 | 82199940 | NM_010914    | chr10 | 82193758 | 82194449 |
| 13 | 82107961 | 82116481 | NM_054053    | chr13 | 82114677 | 82115357 |
| 1  | 82106131 | 82115378 | AY169784     | chr1  | 82114676 | 82115349 |
| 13 | 82107961 | 82116481 | NM_054053    | chr13 | 82109748 | 82110339 |
| 11 | 81993499 | 82002007 | NM_011329    | chr11 | 81994343 | 81995061 |
| 4  | 81973516 | 81982354 | NM_008687    | chr4  | 81981718 | 81982308 |
| 4  | 81973516 | 81982354 | NM_008687    | chr4  | 81973696 | 81974285 |
| 11 | 81855909 | 81864444 | NM_013654    | chr11 | 81862170 | 81862974 |
| 11 | 81845769 | 81854333 | NM_011333    | chr11 | 81851457 | 81852143 |
| 7  | 81805060 | 81813972 | NM_013886    | chr7  | 81805074 | 81805663 |
| 15 | 81758150 | 81766695 | NM_145473    | chr15 | 81763014 | 81763867 |
| 8  | 81714667 | 81723212 | NM_030145    | chr8  | 81721659 | 81722355 |
| 15 | 81668455 | 81692051 | NM_020507    | chr15 | 81677676 | 81679215 |
| 9  | 81654420 | 81662961 | NM_175213    | chr9  | 81659886 | 81660488 |
| 9  | 81426834 | 81435333 | NM_010482    | chr9  | 81428826 | 81429426 |
| 9  | 81426834 | 81435333 | NM_010482    | chr9  | 81427455 | 81428128 |
| 8  | 81399407 | 81408033 | NM_029736    | chr8  | 81406355 | 81407013 |
| 8  | 81402415 | 81411000 | NM_009033    | chr8  | 81406355 | 81407013 |
| 8  | 81330225 | 81338724 | NM_138944    | chr8  | 81333597 | 81334204 |
| 15 | 81015396 | 81023905 | NM_153049    | chr15 | 81023020 | 81023552 |
| 10 | 80972460 | 80981160 | NM_019725    | chr10 | 80980557 | 80980994 |
| 10 | 80956689 | 80965231 | NM_010347    | chr10 | 80958184 | 80958909 |
| 10 | 80896986 | 80909266 | NM_134009    | chr10 | 80901653 | 80902344 |
| 10 | 80896986 | 80909266 | NM_134009    | chr10 | 80898428 | 80899037 |



|    |          |          |              |       |          |          |
|----|----------|----------|--------------|-------|----------|----------|
| 18 | 80867691 | 80881130 | NM_198429    | chr18 | 80871345 | 80872057 |
| 7  | 80818544 | 80827255 | NM_019951    | chr7  | 80820780 | 80821375 |
| 10 | 80743896 | 80759547 | NM_010440    | chr10 | 80744393 | 80744995 |
| 10 | 80720781 | 80734458 | NM_009325    | chr10 | 80725440 | 80726518 |
| 10 | 80667539 | 80676055 | NM_025317    | chr10 | 80674044 | 80675393 |
| 8  | 80618009 | 80626524 | NM_010332    | chr8  | 80623023 | 80623686 |
| 10 | 80573788 | 80589546 | NM_007907    | chr10 | 80581811 | 80582419 |
| 10 | 80493231 | 80508001 | NM_145365    | chr10 | 80501663 | 80502330 |
| 15 | 80492608 | 80501623 | NM_145986    | chr15 | 80499271 | 80499922 |
| 10 | 80398671 | 80410494 | NM_001038655 | chr10 | 80401048 | 80401645 |
| 8  | 80344498 | 80352997 | AF297029     | chr8  | 80344800 | 80345416 |
| 10 | 80327216 | 80335719 | NM_008655    | chr10 | 80334088 | 80335017 |
| 10 | 80301396 | 80315521 | NM_013895    | chr10 | 80311811 | 80312711 |
| 10 | 80301396 | 80315521 | NM_013895    | chr10 | 80305723 | 80306780 |
| 9  | 80259754 | 80268323 | NM_022016    | chr9  | 80266663 | 80267279 |
| 10 | 80252386 | 80260903 | NM_175195    | chr10 | 80259148 | 80259732 |
| 10 | 80244660 | 80253159 | NM_001013758 | chr10 | 80247057 | 80247647 |
| 7  | 80234476 | 80250699 | NM_172903    | chr7  | 80239925 | 80240682 |
| 7  | 80234476 | 80250699 | NM_172903    | chr7  | 80237066 | 80237641 |
| 7  | 80234476 | 80250699 | NM_172903    | chr7  | 80235769 | 80236952 |
| 10 | 80223785 | 80232284 | NM_008753    | chr10 | 80230442 | 80231120 |
| 7  | 80128733 | 80145956 | NM_178070    | chr7  | 80140511 | 80141166 |
| 10 | 80072606 | 80085003 | NM_021462    | chr10 | 80072657 | 80073398 |
| 15 | 80055375 | 80063874 | NM_178719    | chr15 | 80063093 | 80063712 |
| 10 | 79977924 | 79986423 | NM_078477    | chr10 | 79980010 | 79980659 |
| 17 | 79968032 | 79976660 | NM_144802    | chr17 | 79969557 | 79970514 |
| 3  | 79925157 | 79934589 | NM_027495    | chr3  | 79927159 | 79927763 |
| 15 | 79912589 | 79921088 | NM_207708    | chr15 | 79919676 | 79920466 |
| 12 | 79897087 | 79905586 | BC079613     | chr12 | 79902330 | 79902923 |
| 10 | 79892035 | 79900582 | NM_139226    | chr10 | 79892788 | 79893777 |
| 15 | 79757367 | 79765901 | NM_144811    | chr15 | 79757717 | 79758322 |
| 10 | 79746335 | 79757541 | NM_025629    | chr10 | 79746344 | 79746956 |
| 10 | 79721145 | 79738602 | NM_008793    | chr10 | 79724902 | 79725508 |
| 7  | 79713298 | 79721865 | NM_008486    | chr7  | 79717810 | 79718469 |
| 7  | 79661771 | 79673301 | NM_008588    | chr7  | 79670651 | 79671256 |
| 10 | 79623727 | 79639902 | NM_023431    | chr10 | 79634534 | 79635388 |
| 15 | 79629396 | 79637964 | NM_030689    | chr15 | 79630812 | 79631560 |
| 17 | 79620868 | 79629367 | NM_009994    | chr17 | 79625855 | 79626456 |
| 17 | 79620868 | 79629367 | NM_009994    | chr17 | 79621768 | 79622644 |
| 10 | 79564970 | 79585370 | NM_007909    | chr10 | 79584948 | 79585333 |
| 10 | 79564970 | 79585370 | NM_007909    | chr10 | 79584043 | 79584777 |
| 10 | 79564970 | 79585370 | NM_007909    | chr10 | 79571005 | 79571600 |
| 10 | 79564970 | 79585370 | NM_007909    | chr10 | 79566822 | 79567481 |
| 9  | 79542873 | 79551537 | NM_009945    | chr9  | 79545868 | 79546491 |
| 17 | 79517226 | 79526037 | NM_201361    | chr17 | 79524919 | 79525567 |
| 9  | 79501650 | 79510362 | NM_007730    | chr9  | 79503452 | 79504020 |
| 7  | 79488608 | 79497170 | NM_019799    | chr7  | 79490651 | 79491529 |

|    |          |                       |       |          |          |
|----|----------|-----------------------|-------|----------|----------|
| 10 | 79476069 | 79484568 BC064113     | chr10 | 79483025 | 79483549 |
| 10 | 79413955 | 79425303 NM_027521    | chr10 | 79423908 | 79424507 |
| 11 | 79401407 | 79409906 NM_175543    | chr11 | 79401424 | 79402143 |
| 10 | 79367844 | 79376352 NM_130455    | chr10 | 79370156 | 79371173 |
| 7  | 79336282 | 79345786 NM_017462    | chr7  | 79339036 | 79339629 |
| 10 | 79306324 | 79336261 NM_007880    | chr10 | 79335243 | 79335847 |
| 10 | 79306324 | 79336261 NM_007880    | chr10 | 79332678 | 79333442 |
| 10 | 79306324 | 79336261 NM_007880    | chr10 | 79323292 | 79323942 |
| 10 | 79309522 | 79326059 NM_198107    | chr10 | 79323292 | 79323942 |
| 10 | 79306324 | 79336261 NM_007880    | chr10 | 79316272 | 79317731 |
| 10 | 79309522 | 79326059 NM_198107    | chr10 | 79316272 | 79317731 |
| 10 | 79306324 | 79336261 NM_007880    | chr10 | 79310117 | 79311091 |
| 10 | 79309522 | 79326059 NM_198107    | chr10 | 79310117 | 79311091 |
| 10 | 79276796 | 79296540 NM_011178    | chr10 | 79295717 | 79296317 |
| 15 | 79266755 | 79275257 NM_013767    | chr15 | 79270081 | 79270770 |
| 10 | 79251734 | 79267645 NM_001077363 | chr10 | 79259878 | 79260582 |
| 10 | 79251734 | 79267645 NM_001077363 | chr10 | 79258140 | 79258722 |
| 10 | 79189615 | 79198114 NM_001042710 | chr10 | 79197115 | 79197732 |
| 10 | 79190717 | 79199216 BC015297     | chr10 | 79197115 | 79197732 |
| 10 | 79113763 | 79122262 NM_008226    | chr10 | 79113952 | 79114543 |
| 10 | 79079324 | 79099386 NM_177613    | chr10 | 79087301 | 79087900 |
| 10 | 79023354 | 79031853 BC059866     | chr10 | 79023604 | 79024545 |
| 10 | 79014630 | 79023129 NM_198614    | chr10 | 79016163 | 79017017 |
| 15 | 78962610 | 78971121 NM_027231    | chr15 | 78968084 | 78968737 |
| 15 | 78965890 | 78974506 NM_138581    | chr15 | 78968084 | 78968737 |
| 10 | 78951038 | 78964220 NM_027422    | chr10 | 78952116 | 78952874 |
| 15 | 78863187 | 78871686 NM_015738    | chr15 | 78868760 | 78869622 |
| 15 | 78863187 | 78871686 NM_015738    | chr15 | 78866221 | 78866834 |
| 15 | 78863187 | 78871686 NM_015738    | chr15 | 78864171 | 78864820 |
| 15 | 78804311 | 78812871 NM_001024716 | chr15 | 78810692 | 78811309 |
| 11 | 78798527 | 78807046 NM_010708    | chr11 | 78805018 | 78805632 |
| 15 | 78735174 | 78743711 NM_020271    | chr15 | 78741091 | 78741718 |
| 17 | 78736804 | 78746383 BC086652     | chr17 | 78740328 | 78741183 |
| 15 | 78663902 | 78672413 NM_027219    | chr15 | 78666454 | 78667422 |
| 5  | 78583927 | 78592426 AY487415     | chr5  | 78588209 | 78588624 |
| 11 | 78510206 | 78519568 NM_008702    | chr11 | 78515653 | 78516271 |
| 11 | 78510206 | 78519568 NM_008702    | chr11 | 78514985 | 78515604 |
| 15 | 78499123 | 78507622 BC079588     | chr15 | 78499666 | 78501244 |
| 7  | 78446343 | 78454842 BC006942     | chr7  | 78452151 | 78452913 |
| 7  | 78448989 | 78457488 NM_008746    | chr7  | 78452151 | 78452913 |
| 15 | 78432584 | 78441083 BC039640     | chr15 | 78433063 | 78434230 |
| 9  | 78395230 | 78403960 NM_153098    | chr9  | 78401533 | 78402170 |
| 10 | 78380921 | 78389420 NM_147071    | chr10 | 78387775 | 78388411 |
| 15 | 78379604 | 78396067 BC114397     | chr15 | 78386802 | 78387268 |
| 5  | 78379259 | 78387775 NM_153798    | chr5  | 78384603 | 78385296 |
| 1  | 78369502 | 78378044 NM_011811    | chr1  | 78371166 | 78371987 |
| 18 | 78366017 | 78374516 AF258601     | chr18 | 78366084 | 78366943 |

|    |          |          |              |       |          |          |
|----|----------|----------|--------------|-------|----------|----------|
| 6  | 78349492 | 78358293 | NM_009042    | chr6  | 78357589 | 78358175 |
| 11 | 78322382 | 78334363 | NM_199199    | chr11 | 78326383 | 78326995 |
| 14 | 78315846 | 78324440 | NM_026474    | chr14 | 78320468 | 78321054 |
| 11 | 78309315 | 78322207 | NM_011707    | chr11 | 78319654 | 78320578 |
| 11 | 78311399 | 78319949 | NM_172795    | chr11 | 78319654 | 78320578 |
| 5  | 78167298 | 78176030 | AF492704     | chr5  | 78174025 | 78174647 |
| 5  | 78167298 | 78176030 | AF492704     | chr5  | 78168190 | 78169203 |
| 9  | 78161724 | 78170272 | NM_026480    | chr9  | 78166598 | 78167294 |
| 9  | 78161724 | 78170272 | NM_026480    | chr9  | 78165319 | 78165938 |
| 12 | 78150965 | 78160360 | NM_016893    | chr12 | 78156766 | 78157384 |
| 10 | 78116516 | 78127371 | NM_009809    | chr10 | 78118050 | 78118644 |
| 11 | 77990362 | 78005758 | NM_080849    | chr11 | 78005573 | 78006172 |
| 11 | 77998635 | 78013398 | NM_033475    | chr11 | 78005573 | 78006172 |
| 11 | 77979223 | 77987722 | NM_009423    | chr11 | 77986495 | 77987181 |
| 11 | 77979223 | 77987722 | NM_009423    | chr11 | 77984984 | 77985575 |
| 15 | 77943716 | 77953283 | NM_007583    | chr15 | 77947178 | 77948342 |
| 12 | 77878526 | 77887025 | NM_008558    | chr12 | 77881027 | 77881646 |
| 11 | 77793408 | 77801907 | NM_174852    | chr11 | 77794063 | 77794764 |
| 13 | 77593098 | 77601600 | BC089469     | chr13 | 77598011 | 77598788 |
| 13 | 77596488 | 77604987 | BC100362     | chr13 | 77598011 | 77598788 |
| 10 | 77570391 | 77578897 | NM_138601    | chr10 | 77575809 | 77576858 |
| 15 | 77550327 | 77558826 | NM_173743    | chr15 | 77551088 | 77551685 |
| 1  | 77395652 | 77404236 | NM_007936    | chr1  | 77397232 | 77397817 |
| 9  | 77327253 | 77336563 | NM_172528    | chr9  | 77328447 | 77330011 |
| 12 | 77317016 | 77325742 | NM_008301    | chr12 | 77324086 | 77324668 |
| 11 | 77303607 | 77312106 | NM_001004144 | chr11 | 77304889 | 77305494 |
| 12 | 77283106 | 77291941 | NM_178744    | chr12 | 77284728 | 77285656 |
| 12 | 77285340 | 77293839 | NM_028356    | chr12 | 77284728 | 77285656 |
| 5  | 77252655 | 77261224 | NM_011626    | chr5  | 77260309 | 77260906 |
| 15 | 77235768 | 77244357 | BC057684     | chr15 | 77240407 | 77241038 |
| 6  | 77166199 | 77174854 | NM_028880    | chr6  | 77173893 | 77174498 |
| 6  | 77166199 | 77174854 | NM_028880    | chr6  | 77172987 | 77173659 |
| 10 | 77144360 | 77172719 | NM_010670    | chr10 | 77164035 | 77164808 |
| 10 | 77144360 | 77172719 | NM_010670    | chr10 | 77150249 | 77150948 |
| 9  | 77131272 | 77139771 | BC089626     | chr9  | 77137425 | 77138349 |
| 12 | 77093600 | 77102099 | NM_207707    | chr12 | 77100933 | 77101511 |
| 10 | 77019436 | 77027986 | NM_145925    | chr10 | 77025342 | 77025971 |
| 2  | 76780887 | 76789386 | NM_011652    | chr2  | 76783685 | 76784600 |
| 15 | 76769799 | 76778533 | NM_054099    | chr15 | 76775537 | 76776242 |
| 14 | 76632488 | 76641061 | NM_029495    | chr14 | 76639737 | 76640374 |
| 15 | 76535232 | 76557095 | NM_058214    | chr15 | 76552303 | 76553192 |
| 15 | 76535232 | 76557095 | NM_058214    | chr15 | 76542560 | 76543270 |
| 15 | 76535232 | 76557095 | NM_058214    | chr15 | 76540279 | 76540889 |
| 15 | 76535232 | 76557095 | NM_058214    | chr15 | 76536020 | 76536759 |
| 15 | 76511727 | 76531304 | NM_027122    | chr15 | 76516100 | 76516753 |
| 15 | 76492935 | 76501434 | NM_033371    | chr15 | 76495491 | 76496154 |
| 15 | 76494704 | 76503203 | NM_007989    | chr15 | 76495491 | 76496154 |

|    |          |          |              |       |          |          |
|----|----------|----------|--------------|-------|----------|----------|
| 15 | 76464667 | 76473166 | NM_183091    | chr15 | 76471516 | 76472840 |
| 2  | 76445112 | 76453611 | DQ365828     | chr2  | 76452932 | 76453412 |
| 15 | 76441608 | 76450147 | NM_028064    | chr15 | 76449314 | 76449945 |
| 15 | 76432310 | 76440846 | NM_053193    | chr15 | 76439829 | 76440683 |
| 10 | 76403005 | 76411504 | NM_021568    | chr10 | 76405594 | 76406481 |
| 15 | 76360138 | 76368697 | NM_029643    | chr15 | 76367088 | 76367985 |
| 15 | 76363491 | 76371990 | NM_013909    | chr15 | 76367088 | 76367985 |
| 15 | 76346658 | 76360276 | NM_130893    | chr15 | 76350256 | 76351014 |
| 11 | 76282145 | 76290649 | BC059064     | chr11 | 76288049 | 76288637 |
| 11 | 76282145 | 76290649 | BC059064     | chr11 | 76283264 | 76284065 |
| 15 | 76278693 | 76287274 | NM_198885    | chr15 | 76281491 | 76282605 |
| 15 | 76278693 | 76287274 | NM_198885    | chr15 | 76279546 | 76280163 |
| 5  | 76257626 | 76266125 | NM_010612    | chr5  | 76261465 | 76262130 |
| 16 | 76232706 | 76241205 | BC060232     | chr16 | 76238513 | 76239193 |
| 11 | 76212797 | 76221336 | NM_008750    | chr11 | 76215873 | 76216436 |
| 2  | 76158788 | 76167288 | NM_009989    | chr2  | 76161025 | 76161619 |
| 14 | 76108801 | 76117300 | BC052062     | chr14 | 76110043 | 76110641 |
| 15 | 76068153 | 76076689 | BC024074     | chr15 | 76068817 | 76069647 |
| 15 | 76054253 | 76064633 | NM_011117    | chr15 | 76060252 | 76060894 |
| 15 | 76054253 | 76064633 | NM_011117    | chr15 | 76056177 | 76057124 |
| 10 | 75880088 | 75895359 | NM_029816    | chr10 | 75883667 | 75884312 |
| 10 | 75884003 | 75892628 | NM_008787    | chr10 | 75883667 | 75884312 |
| 15 | 75815024 | 75825693 | NM_177922    | chr15 | 75822990 | 75823664 |
| 18 | 75820420 | 75828919 | NM_201354    | chr18 | 75820433 | 75821022 |
| 7  | 75734576 | 75743075 | BC022600     | chr7  | 75739288 | 75739962 |
| 15 | 75719237 | 75727736 | NM_172607    | chr15 | 75722523 | 75723305 |
| 18 | 75486730 | 75495229 | NM_001042660 | chr18 | 75489239 | 75490197 |
| 9  | 75467425 | 75475926 | NM_009130    | chr9  | 75469308 | 75470001 |
| 1  | 75423419 | 75431945 | NM_009208    | chr1  | 75426902 | 75427582 |
| 9  | 75405650 | 75414706 | NM_027309    | chr9  | 75411193 | 75411912 |
| 1  | 75384329 | 75394789 | NM_178884    | chr1  | 75386436 | 75387148 |
| 10 | 75331114 | 75339630 | NM_024440    | chr10 | 75337788 | 75338529 |
| 1  | 75278198 | 75286697 | U57098       | chr1  | 75284859 | 75285803 |
| 1  | 75237492 | 75245991 | NM_010043    | chr1  | 75245195 | 75245947 |
| 8  | 75231705 | 75240252 | BC103792     | chr8  | 75232916 | 75234020 |
| 11 | 75231694 | 75244818 | NM_011340    | chr11 | 75232164 | 75232749 |
| 11 | 75158693 | 75167293 | NM_177009    | chr11 | 75164425 | 75165101 |
| 11 | 75162000 | 75170505 | NM_026653    | chr11 | 75164425 | 75165101 |
| 1  | 75158992 | 75167528 | NM_009049    | chr1  | 75161093 | 75161697 |
| 14 | 75143847 | 75152767 | NM_207652    | chr14 | 75151859 | 75152466 |
| 9  | 75127676 | 75136194 | NM_013479    | chr9  | 75133594 | 75134302 |
| 1  | 75113613 | 75122203 | NM_178055    | chr1  | 75114276 | 75115248 |
| 9  | 75091286 | 75102650 | NM_138719    | chr9  | 75100888 | 75101477 |
| 15 | 75089676 | 75098175 | NM_008530    | chr15 | 75093845 | 75094624 |
| 18 | 75083972 | 75092625 | NM_010720    | chr18 | 75092213 | 75092577 |
| 17 | 75077942 | 75086471 | NM_206958    | chr17 | 75078612 | 75079223 |
| 1  | 75060931 | 75069430 | NM_023732    | chr1  | 75068751 | 75069342 |

|    |          |          |              |       |          |          |
|----|----------|----------|--------------|-------|----------|----------|
| 1  | 75069282 | 75077969 | NM_026187    | chr1  | 75068751 | 75069342 |
| 8  | 75058275 | 75066809 | NM_001001491 | chr8  | 75058861 | 75059447 |
| 1  | 75014586 | 75031579 | NM_026977    | chr1  | 75027043 | 75027799 |
| 5  | 74982084 | 74990593 | AF034745     | chr5  | 74982730 | 74983341 |
| 5  | 74956990 | 74965521 | NM_010727    | chr5  | 74957678 | 74958652 |
| 18 | 74835322 | 74843821 | M55253       | chr18 | 74838344 | 74839214 |
| 12 | 74820742 | 74829367 | NM_010431    | chr12 | 74827523 | 74828326 |
| 15 | 74822372 | 74831159 | NM_010738    | chr15 | 74825612 | 74826631 |
| 1  | 74816127 | 74839928 | NM_153111    | chr1  | 74817550 | 74818176 |
| 8  | 74648350 | 74656849 | NM_028715    | chr8  | 74649828 | 74650436 |
| 11 | 74641119 | 74649692 | NM_010813    | chr11 | 74643794 | 74644434 |
| 9  | 74629128 | 74637628 | BC023444     | chr9  | 74634993 | 74635622 |
| 15 | 74588323 | 74596822 | NM_010742    | chr15 | 74589334 | 74589926 |
| 15 | 74571443 | 74586243 | NM_011838    | chr15 | 74578740 | 74579354 |
| 15 | 74571443 | 74586243 | NM_011838    | chr15 | 74571929 | 74572670 |
| 15 | 74552781 | 74567584 | NM_020519    | chr15 | 74561247 | 74561940 |
| 15 | 74552781 | 74567584 | NM_020519    | chr15 | 74553691 | 74554296 |
| 15 | 74530416 | 74550988 | NM_198607    | chr15 | 74543982 | 74544650 |
| 10 | 74472084 | 74483329 | NM_029781    | chr10 | 74478352 | 74479003 |
| 13 | 74469480 | 74477979 | NM_182839    | chr13 | 74475934 | 74476593 |
| 15 | 74459605 | 74469516 | BC111897     | chr15 | 74465862 | 74466465 |
| 8  | 74438221 | 74446741 | NM_032398    | chr8  | 74440269 | 74441090 |
| 13 | 74401169 | 74409769 | NM_027182    | chr13 | 74408320 | 74409026 |
| 8  | 74387915 | 74400739 | NM_053162    | chr8  | 74399818 | 74400476 |
| 2  | 74390244 | 74398746 | BC038626     | chr2  | 74392312 | 74392718 |
| 13 | 74311084 | 74319614 | NM_028186    | chr13 | 74317164 | 74317906 |
| 17 | 74311262 | 74319761 | BC005753     | chr17 | 74314253 | 74314867 |
| 1  | 74226151 | 74234650 | BC004752     | chr1  | 74231485 | 74232201 |
| 1  | 74163757 | 74172458 | NM_029711    | chr1  | 74170751 | 74171424 |
| 13 | 74141502 | 74150024 | NM_001040692 | chr13 | 74144944 | 74145980 |
| 18 | 74093659 | 74102158 | BC062911     | chr18 | 74099350 | 74100103 |
| 5  | 73909057 | 73917563 | NM_153568    | chr5  | 73916806 | 73917403 |
| 12 | 73852732 | 73861282 | NM_011384    | chr12 | 73858576 | 73859177 |
| 17 | 73852582 | 73861081 | NM_011723    | chr17 | 73856167 | 73856953 |
| 17 | 73852582 | 73861081 | NM_011723    | chr17 | 73853222 | 73853839 |
| 5  | 73830404 | 73838903 | BC031793     | chr5  | 73833894 | 73834696 |
| 5  | 73830404 | 73838903 | BC031793     | chr5  | 73830501 | 73831137 |
| 8  | 73819170 | 73832403 | NM_053248    | chr8  | 73824264 | 73825007 |
| X  | 73757823 | 73766445 | NM_020601    | chrX  | 73762410 | 73763161 |
| 17 | 73703746 | 73712478 | NM_020578    | chr17 | 73707411 | 73708029 |
| 18 | 73692790 | 73701291 | NM_001039214 | chr18 | 73698805 | 73699410 |
| 17 | 73612618 | 73621117 | NM_027864    | chr17 | 73620370 | 73621086 |
| 15 | 73569667 | 73581632 | NM_008975    | chr15 | 73580227 | 73580897 |
| 8  | 73558114 | 73567084 | NM_011819    | chr8  | 73558517 | 73559114 |
| 15 | 73546053 | 73554684 | BC066043     | chr15 | 73552851 | 73553546 |
| 8  | 73517470 | 73525978 | NM_023627    | chr8  | 73521588 | 73522190 |
| 8  | 73517470 | 73525978 | NM_023627    | chr8  | 73518354 | 73518893 |

|    |          |          |              |       |          |          |
|----|----------|----------|--------------|-------|----------|----------|
| 8  | 73450792 | 73461015 | NM_010223    | chr8  | 73459600 | 73460450 |
| 8  | 73433235 | 73445356 | NM_025577    | chr8  | 73438778 | 73439388 |
| 7  | 73243020 | 73251532 | NM_177740    | chr7  | 73246498 | 73247613 |
| 8  | 73238763 | 73247275 | NM_138647    | chr8  | 73238972 | 73239614 |
| 10 | 73211183 | 73219682 | NM_023115    | chr10 | 73215680 | 73216320 |
| 2  | 73184716 | 73193237 | BC115698     | chr2  | 73192764 | 73193219 |
| 2  | 73107491 | 73115990 | NM_029022    | chr2  | 73110819 | 73111475 |
| 2  | 73110843 | 73119406 | NM_025854    | chr2  | 73110819 | 73111475 |
| 13 | 73089295 | 73097975 | NM_010574    | chr13 | 73093340 | 73094391 |
| 11 | 73077815 | 73086328 | NM_145099    | chr11 | 73084923 | 73085638 |
| 5  | 73029377 | 73037912 | U16145       | chr5  | 73036130 | 73036735 |
| 5  | 73013141 | 73021737 | NM_013698    | chr5  | 73016766 | 73017811 |
| 11 | 73012702 | 73021214 | NM_031251    | chr11 | 73015147 | 73015738 |
| 8  | 72952739 | 72961238 | BC023401     | chr8  | 72957158 | 72957748 |
| 11 | 72951984 | 72960489 | NM_010353    | chr11 | 72952638 | 72953428 |
| 8  | 72841088 | 72851346 | BC031407     | chr8  | 72841145 | 72841799 |
| 8  | 72825173 | 72833703 | NM_032004    | chr8  | 72831426 | 72832563 |
| 8  | 72828136 | 72837701 | NM_023312    | chr8  | 72831426 | 72832563 |
| 17 | 72817317 | 72825825 | NM_029999    | chr17 | 72823378 | 72823972 |
| 5  | 72793932 | 72809364 | BC022652     | chr5  | 72801312 | 72801997 |
| 8  | 72745418 | 72754053 | NM_020028    | chr8  | 72745835 | 72746423 |
| 8  | 72714223 | 72729884 | NM_133224    | chr8  | 72727079 | 72727700 |
| 11 | 72602913 | 72618235 | NM_001024926 | chr11 | 72611493 | 72612102 |
| 11 | 72606449 | 72614948 | NM_001045536 | chr11 | 72611493 | 72612102 |
| 5  | 72553182 | 72561681 | BC029551     | chr5  | 72554378 | 72554981 |
| 8  | 72545879 | 72560537 | NM_172754    | chr8  | 72552748 | 72553270 |
| 6  | 72467948 | 72487279 | NM_001042534 | chr6  | 72469911 | 72470684 |
| 15 | 72371036 | 72379535 | NM_001033876 | chr15 | 72376600 | 72377196 |
| 6  | 72366508 | 72375067 | NM_145569    | chr6  | 72371448 | 72372004 |
| 6  | 72270843 | 72288161 | NM_144916    | chr6  | 72284760 | 72285375 |
| 11 | 72268237 | 72278814 | BC025823     | chr11 | 72272366 | 72272969 |
| 1  | 72143016 | 72151515 | NM_001005423 | chr1  | 72150474 | 72151078 |
| 11 | 72111858 | 72120359 | NM_001037713 | chr11 | 72116636 | 72117379 |
| 2  | 72080605 | 72089115 | NM_178084    | chr2  | 72088432 | 72089087 |
| 11 | 71851205 | 71859704 | NM_053245    | chr11 | 71856234 | 71856924 |
| 11 | 71852697 | 71861709 | NM_144526    | chr11 | 71856234 | 71856924 |
| 11 | 71851205 | 71859704 | NM_053245    | chr11 | 71852331 | 71853199 |
| 11 | 71852697 | 71861709 | NM_144526    | chr11 | 71852331 | 71853199 |
| 2  | 71776054 | 71784578 | NM_019688    | chr2  | 71782511 | 71783227 |
| 11 | 71560898 | 71569397 | NM_177618    | chr11 | 71566526 | 71567126 |
| 6  | 71559579 | 71568414 | NM_173001    | chr6  | 71563036 | 71563695 |
| 17 | 71450918 | 71463614 | AY820307     | chr17 | 71457323 | 71457726 |
| 9  | 71388418 | 71396920 | NM_001033208 | chr9  | 71392515 | 71393129 |
| 12 | 71365741 | 71374258 | NM_028339    | chr12 | 71365797 | 71366357 |
| 2  | 71344794 | 71353580 | NM_010054    | chr2  | 71346562 | 71347170 |
| 2  | 71324284 | 71332925 | NM_010053    | chr2  | 71326363 | 71327030 |
| 13 | 71306683 | 71315183 | NM_172053    | chr13 | 71308388 | 71308973 |

|   |    |          |                       |       |          |          |
|---|----|----------|-----------------------|-------|----------|----------|
|   | 6  | 71249243 | 71257742 U76371       | chr6  | 71250430 | 71251026 |
|   | 12 | 71143723 | 71152230 NM_133198    | chr12 | 71145473 | 71146427 |
|   | 17 | 71082835 | 71091334 AF286723     | chr17 | 71087285 | 71087995 |
|   | 17 | 70892856 | 70913390 NM_026064    | chr17 | 70901634 | 70902337 |
|   | 11 | 70847151 | 70855708 NM_134022    | chr11 | 70855119 | 70855660 |
|   | 12 | 70820441 | 70828940 BC050784     | chr12 | 70827099 | 70827951 |
|   | 11 | 70818122 | 70826627 NM_178367    | chr11 | 70825578 | 70826187 |
|   | 10 | 70678034 | 70686533 NM_145420    | chr10 | 70678476 | 70679399 |
|   | 11 | 70540334 | 70548833 BC016221     | chr11 | 70540698 | 70541628 |
|   | 11 | 70482989 | 70491488 NM_172561    | chr11 | 70490448 | 70491063 |
|   | 11 | 70449317 | 70466283 NM_010326    | chr11 | 70456569 | 70457370 |
| X |    | 70374184 | 70382713 NM_008106    | chrX  | 70379383 | 70379973 |
|   | 11 | 70273196 | 70282179 NM_023158    | chr11 | 70281480 | 70282083 |
|   | 7  | 70231483 | 70246259 NM_009697    | chr7  | 70231309 | 70231907 |
|   | 11 | 70223720 | 70232226 NM_029231    | chr11 | 70224226 | 70224822 |
|   | 11 | 70210626 | 70219125 BC016444     | chr11 | 70213392 | 70214007 |
|   | 11 | 70069037 | 70077536 NM_007440    | chr11 | 70072491 | 70073190 |
|   | 13 | 69998712 | 70007211 NM_198600    | chr13 | 69999400 | 69999990 |
| X |    | 69886161 | 69894660 NM_029352    | chrX  | 69888704 | 69889663 |
|   | 11 | 69864564 | 69873392 NM_009714    | chr11 | 69871093 | 69871686 |
|   | 5  | 69830077 | 69838622 NM_172711    | chr5  | 69836450 | 69837069 |
|   | 11 | 69734326 | 69744153 NM_181582    | chr11 | 69737469 | 69738196 |
|   | 10 | 69634633 | 69643177 NM_025807    | chr10 | 69639965 | 69640513 |
|   | 11 | 69609639 | 69627819 NM_009601    | chr11 | 69621207 | 69621906 |
| X |    | 69589355 | 69597854 NM_031494    | chrX  | 69595965 | 69596656 |
| X |    | 69540736 | 69549235 NM_031493    | chrX  | 69544710 | 69545344 |
| X |    | 69474738 | 69483525 NM_007978    | chrX  | 69476324 | 69476897 |
| X |    | 69461069 | 69469609 NM_021365    | chrX  | 69467471 | 69468574 |
|   | 11 | 69465508 | 69474007 NM_009235    | chr11 | 69467039 | 69467741 |
| X |    | 69438936 | 69447441 BC064787     | chrX  | 69446700 | 69447295 |
| X |    | 69438936 | 69447441 BC064787     | chrX  | 69445565 | 69446473 |
| X |    | 69438936 | 69447441 BC064787     | chrX  | 69441141 | 69441669 |
| X |    | 69399671 | 69408170 NM_001025384 | chrX  | 69406949 | 69408119 |
| X |    | 69399671 | 69408170 NM_001025384 | chrX  | 69403356 | 69405051 |
| X |    | 69363767 | 69378335 NM_001025383 | chrX  | 69365000 | 69365601 |
| X |    | 69363767 | 69378335 NM_001025383 | chrX  | 69363794 | 69364563 |
|   | 14 | 69350983 | 69359625 BC037021     | chr14 | 69352860 | 69353447 |
| X |    | 69345296 | 69355761 NM_011726    | chrX  | 69345429 | 69346071 |
| X |    | 69332699 | 69341198 BC098242     | chrX  | 69339914 | 69340643 |
|   | 14 | 69306927 | 69315678 NM_153136    | chr14 | 69312086 | 69313430 |
|   | 17 | 69282880 | 69292843 NM_009547    | chr17 | 69291918 | 69292526 |
|   | 14 | 69274434 | 69292351 NM_021877    | chr14 | 69282729 | 69283415 |
|   | 14 | 69252769 | 69265156 NM_009755    | chr14 | 69259963 | 69260553 |
|   | 14 | 69259919 | 69268541 NM_145219    | chr14 | 69259963 | 69260553 |
|   | 14 | 69252769 | 69265156 NM_009755    | chr14 | 69256933 | 69257525 |
|   | 11 | 69205986 | 69220207 NM_030083    | chr11 | 69219858 | 69220932 |
|   | 11 | 69209042 | 69220429 NM_025915    | chr11 | 69219858 | 69220932 |

|   |    |          |                       |       |          |          |
|---|----|----------|-----------------------|-------|----------|----------|
|   | 11 | 69205986 | 69220207 NM_030083    | chr11 | 69216192 | 69216801 |
|   | 11 | 69209042 | 69220429 NM_025915    | chr11 | 69216192 | 69216801 |
|   | 14 | 69176028 | 69184527 NM_025945    | chr14 | 69176029 | 69176989 |
|   | 9  | 69083056 | 69091555 BC003757     | chr9  | 69087792 | 69088588 |
|   | 14 | 69083999 | 69092505 NM_144808    | chr14 | 69085128 | 69085769 |
|   | 17 | 69055712 | 69064211 NM_013813    | chr17 | 69057559 | 69058168 |
|   | 2  | 69014810 | 69023336 NM_021331    | chr2  | 69022673 | 69023274 |
|   | 11 | 68909129 | 68919216 NM_011065    | chr11 | 68916757 | 68917693 |
|   | 11 | 68909129 | 68919216 NM_011065    | chr11 | 68913546 | 68914192 |
|   | 11 | 68826291 | 68834807 NM_026889    | chr11 | 68831957 | 68832575 |
|   | 11 | 68801988 | 68810487 BC115876     | chr11 | 68806323 | 68807182 |
|   | 11 | 68787521 | 68796050 AF243512     | chr11 | 68787661 | 68788379 |
|   | 11 | 68778326 | 68786883 NM_028048    | chr11 | 68782693 | 68783324 |
|   | 11 | 68740745 | 68749266 NM_145746    | chr11 | 68742557 | 68743409 |
|   | 11 | 68711802 | 68720329 BC070397     | chr11 | 68718205 | 68718959 |
|   | 10 | 68597909 | 68610532 BC099973     | chr10 | 68609287 | 68609893 |
|   | 11 | 68502110 | 68510833 NM_175260    | chr11 | 68507333 | 68508175 |
| X |    | 68468737 | 68477236 NM_020280    | chrX  | 68474350 | 68474971 |
|   | 14 | 68465115 | 68473621 NM_134078    | chr14 | 68466776 | 68467385 |
|   | 14 | 68453817 | 68462316 BC006648     | chr14 | 68456362 | 68456912 |
|   | 9  | 68446966 | 68455465 NM_013646    | chr9  | 68453275 | 68454051 |
|   | 13 | 68356440 | 68364939 BC048507     | chr13 | 68361588 | 68362046 |
|   | 13 | 68325833 | 68334332 NM_001015506 | chr13 | 68331051 | 68331702 |
|   | 13 | 68303349 | 68315435 NM_198322    | chr13 | 68309253 | 68309965 |
|   | 12 | 68137309 | 68145854 NM_207010    | chr12 | 68140147 | 68140748 |
|   | 10 | 68113103 | 68121680 NM_177794    | chr10 | 68120069 | 68121030 |
|   | 15 | 68086017 | 68094516 NM_198644    | chr15 | 68089039 | 68089737 |
| X |    | 68050336 | 68058835 BC086890     | chrX  | 68056337 | 68056978 |
|   | 13 | 67918016 | 67926515 NM_177811    | chr13 | 67918776 | 67919481 |
|   | 2  | 67912567 | 67921066 NM_020283    | chr2  | 67918361 | 67918990 |
|   | 17 | 67906504 | 67915043 NM_172964    | chr17 | 67906756 | 67907695 |
|   | 18 | 67628604 | 67637103 BC046486     | chr18 | 67631076 | 67631687 |
|   | 7  | 67630698 | 67639206 NM_201639    | chr7  | 67630907 | 67631498 |
| X |    | 67619316 | 67627845 NM_016985    | chrX  | 67624293 | 67625003 |
|   | 10 | 67430758 | 67439257 AY036116     | chr10 | 67436930 | 67437604 |
|   | 10 | 67368962 | 67377461 BC116341     | chr10 | 67374058 | 67374759 |
|   | 13 | 67338575 | 67347099 NM_026219    | chr13 | 67342645 | 67343229 |
|   | 3  | 67066571 | 67075700 NM_013665    | chr3  | 67068786 | 67069561 |
|   | 3  | 67067601 | 67076149 NM_025822    | chr3  | 67068786 | 67069561 |
|   | 3  | 67066571 | 67075700 NM_013665    | chr3  | 67066579 | 67067565 |
|   | 14 | 67031214 | 67039788 NM_010910    | chr14 | 67037018 | 67037758 |
|   | 5  | 66895299 | 66903806 NM_009686    | chr5  | 66896995 | 66897587 |
|   | 5  | 66895299 | 66903806 NM_009686    | chr5  | 66896314 | 66896904 |
|   | 11 | 66866266 | 66874789 NM_025510    | chr11 | 66868277 | 66869482 |
|   | 14 | 66658256 | 66675171 NM_175384    | chr14 | 66658749 | 66659458 |
|   | 15 | 66639763 | 66648262 NM_009192    | chr15 | 66646650 | 66647363 |
| X |    | 66623041 | 66631640 NM_010498    | chrX  | 66630044 | 66630694 |



|   |    |          |                       |       |          |          |
|---|----|----------|-----------------------|-------|----------|----------|
|   | 9  | 66388487 | 66397095 NM_144937    | chr9  | 66389119 | 66389859 |
|   | 17 | 66288356 | 66296855 NM_172963    | chr17 | 66293430 | 66294574 |
|   | 14 | 66181402 | 66191721 NM_010095    | chr14 | 66189143 | 66189835 |
|   | 3  | 66043591 | 66052154 NM_019937    | chr3  | 66043747 | 66044922 |
|   | 18 | 65992863 | 66001362 NM_175012    | chr18 | 65995934 | 65996626 |
|   | 12 | 65881606 | 65890139 NM_025707    | chr12 | 65883262 | 65884088 |
|   | 12 | 65830516 | 65839015 NM_001025605 | chr12 | 65837645 | 65838342 |
|   | 5  | 65769466 | 65778073 NM_133697    | chr5  | 65772476 | 65773083 |
|   | 18 | 65744672 | 65753171 BC046409     | chr18 | 65746221 | 65746897 |
|   | 5  | 65712356 | 65720977 NM_009466    | chr5  | 65713377 | 65714002 |
|   | 4  | 65669313 | 65677812 AF116573     | chr4  | 65673032 | 65673632 |
| X |    | 65614996 | 65623495 NM_008032    | chrX  | 65620629 | 65621216 |
|   | 3  | 65610376 | 65618901 NM_178892    | chr3  | 65617435 | 65618064 |
|   | 11 | 65601945 | 65610492 NM_009157    | chr11 | 65603489 | 65604236 |
|   | 13 | 65287605 | 65296145 NM_178364    | chr13 | 65293962 | 65294350 |
|   | 5  | 65232218 | 65245170 NM_011604    | chr5  | 65234674 | 65235464 |
|   | 5  | 65203888 | 65217834 NM_030682    | chr5  | 65205178 | 65205986 |
|   | 5  | 65085474 | 65098369 DQ981866     | chr5  | 65095462 | 65096285 |
|   | 4  | 65085379 | 65101989 NM_053084    | chr4  | 65085382 | 65086057 |
|   | 6  | 65071777 | 65080486 NM_019455    | chr6  | 65073938 | 65074571 |
|   | 14 | 65063997 | 65072496 AY098585     | chr14 | 65066348 | 65066962 |
|   | 6  | 64966245 | 64975290 NM_007958    | chr6  | 64972011 | 64972644 |
|   | 1  | 64964524 | 64973024 NM_027582    | chr1  | 64966666 | 64967483 |
|   | 14 | 64905355 | 64913854 NM_172604    | chr14 | 64906199 | 64906853 |
|   | 1  | 64669060 | 64678026 NM_022721    | chr1  | 64669550 | 64670143 |
|   | 7  | 64650089 | 64658602 NM_183087    | chr7  | 64656847 | 64657456 |
|   | 7  | 64650089 | 64658602 NM_183087    | chr7  | 64655650 | 64656278 |
|   | 18 | 64572559 | 64581058 NM_007444    | chr18 | 64573505 | 64574104 |
|   | 17 | 64491940 | 64500439 NM_008549    | chr17 | 64498506 | 64499669 |
|   | 7  | 64374656 | 64383155 NM_007461    | chr7  | 64380620 | 64381236 |
|   | 14 | 64376780 | 64385582 NM_010932    | chr14 | 64377003 | 64377710 |
|   | 14 | 64323503 | 64332002 NM_199029    | chr14 | 64324266 | 64324997 |
|   | 11 | 64245473 | 64254026 NM_178870    | chr11 | 64251712 | 64252733 |
|   | 14 | 64214765 | 64223352 NM_015795    | chr14 | 64214717 | 64215335 |
|   | 15 | 64210093 | 64218592 NM_010026    | chr15 | 64213177 | 64214159 |
|   | 7  | 64170518 | 64180985 BC055074     | chr7  | 64178989 | 64179578 |
|   | 9  | 64135964 | 64145196 NM_001001295 | chr9  | 64136169 | 64136758 |
|   | 8  | 64110313 | 64118913 NM_021506    | chr8  | 64117217 | 64117927 |
|   | 9  | 64048839 | 64057611 NM_008927    | chr9  | 64051047 | 64051820 |
|   | 14 | 64029471 | 64040585 NM_018788    | chr14 | 64029732 | 64030539 |
|   | 11 | 63893110 | 63901609 NM_178379    | chr11 | 63896233 | 63896790 |
|   | 8  | 63872943 | 63881442 NM_007711    | chr8  | 63873186 | 63873802 |
|   | 13 | 63818462 | 63827055 NM_023507    | chr13 | 63825410 | 63826021 |
|   | 9  | 63816828 | 63826065 NM_008542    | chr9  | 63820852 | 63821463 |
|   | 4  | 63345033 | 63353645 NM_009403    | chr4  | 63345829 | 63346494 |
|   | 4  | 63228949 | 63237474 NM_177371    | chr4  | 63230132 | 63230726 |
|   | 18 | 63072459 | 63080958 AB023957     | chr18 | 63074974 | 63075620 |

|    |          |          |              |       |          |          |
|----|----------|----------|--------------|-------|----------|----------|
| 4  | 63039147 | 63051316 | NM_144905    | chr4  | 63040104 | 63040752 |
| 14 | 62978720 | 62987219 | BC031365     | chr14 | 62982933 | 62983760 |
| 4  | 62917184 | 62925683 | NM_001008798 | chr4  | 62921582 | 62922267 |
| 4  | 62882102 | 62895723 | NM_001045514 | chr4  | 62884115 | 62884993 |
| 4  | 62695773 | 62704272 | NM_025685    | chr4  | 62703214 | 62703807 |
| 1  | 62631593 | 62640480 | NM_001077403 | chr1  | 62638780 | 62639386 |
| 14 | 62495564 | 62504078 | NM_177594    | chr14 | 62495923 | 62496511 |
| 11 | 62458875 | 62467374 | BC096583     | chr11 | 62462719 | 62463518 |
| 11 | 62462219 | 62470718 | NM_198861    | chr11 | 62462719 | 62463518 |
| 14 | 62400527 | 62409026 | BC060626     | chr14 | 62402513 | 62403154 |
| 14 | 62384565 | 62393064 | NM_177628    | chr14 | 62391352 | 62392013 |
| 17 | 62369952 | 62378451 | BC016608     | chr17 | 62372714 | 62373568 |
| 7  | 62296590 | 62305089 | NM_011746    | chr7  | 62297708 | 62298375 |
| 2  | 62210422 | 62218921 | NM_010074    | chr2  | 62211176 | 62211778 |
| 14 | 62081425 | 62089924 | M14222       | chr14 | 62082820 | 62083425 |
| 10 | 61971269 | 61979814 | NM_028197    | chr10 | 61977911 | 61978792 |
| 9  | 61822266 | 61830796 | NM_028748    | chr9  | 61825003 | 61825605 |
| 8  | 61797897 | 61806396 | NM_173411    | chr8  | 61804837 | 61805430 |
| 8  | 61801219 | 61809769 | NM_175032    | chr8  | 61804837 | 61805430 |
| 10 | 61733400 | 61741899 | J05277       | chr10 | 61737838 | 61738222 |
| 9  | 61710045 | 61718548 | U29402       | chr9  | 61714624 | 61715337 |
| 11 | 61668313 | 61677268 | NM_013881    | chr11 | 61670228 | 61670828 |
| 10 | 61522447 | 61531031 | NM_009719    | chr10 | 61522932 | 61523716 |
| 3  | 61446436 | 61455167 | NM_028712    | chr3  | 61450717 | 61451336 |
| 2  | 61373422 | 61381923 | NM_011529    | chr2  | 61376875 | 61377493 |
| 11 | 61315367 | 61323866 | NM_013717    | chr11 | 61320045 | 61320789 |
| 11 | 61307600 | 61316434 | NM_011841    | chr11 | 61315756 | 61316395 |
| 11 | 61315367 | 61323866 | NM_013717    | chr11 | 61315756 | 61316395 |
| 18 | 61224941 | 61233749 | NM_001037859 | chr18 | 61228948 | 61229477 |
| 4  | 61157932 | 61166497 | BC012259     | chr4  | 61159481 | 61160109 |
| 11 | 61080785 | 61089342 | NM_007437    | chr11 | 61084094 | 61084680 |
| 10 | 61037978 | 61046543 | NM_026438    | chr10 | 61044099 | 61044819 |
| 4  | 61003341 | 61011840 | BC037152     | chr4  | 61004671 | 61006254 |
| 11 | 60951030 | 60959529 | NM_021349    | chr11 | 60957986 | 60958572 |
| 1  | 60916460 | 60924975 | NM_017480    | chr1  | 60924384 | 60924929 |
| 1  | 60916460 | 60924975 | NM_017480    | chr1  | 60918614 | 60919213 |
| 11 | 60875999 | 60885606 | NM_010603    | chr11 | 60881766 | 60882377 |
| 10 | 60748897 | 60757396 | NM_013753    | chr10 | 60755573 | 60756209 |
| 18 | 60714586 | 60723157 | NM_133363    | chr18 | 60715547 | 60716392 |
| 2  | 60679810 | 60688309 | BC057866     | chr2  | 60681148 | 60681754 |
| 1  | 60642463 | 60650972 | BC049915     | chr1  | 60646638 | 60647240 |
| 4  | 60634199 | 60642721 | BC099597     | chr4  | 60634493 | 60635251 |
| 13 | 60605570 | 60614333 | NM_029653    | chr13 | 60606486 | 60607097 |
| 10 | 60561343 | 60573118 | NM_001017433 | chr10 | 60567440 | 60568041 |
| 10 | 60478716 | 60489919 | NM_025273    | chr10 | 60485254 | 60486052 |
| 8  | 60398018 | 60406586 | NM_008252    | chr8  | 60405381 | 60405980 |
| 11 | 60279534 | 60288033 | NM_010862    | chr11 | 60283865 | 60284851 |

|    |          |          |              |       |          |          |
|----|----------|----------|--------------|-------|----------|----------|
| 11 | 60227498 | 60236137 | NM_025757    | chr11 | 60231457 | 60232070 |
| 11 | 60230701 | 60239200 | NM_145427    | chr11 | 60231457 | 60232070 |
| 4  | 60231412 | 60239951 | NM_008647    | chr4  | 60231408 | 60232141 |
| 2  | 60181598 | 60190103 | NM_013825    | chr2  | 60184616 | 60185212 |
| 4  | 60052207 | 60060719 | NM_008648    | chr4  | 60052325 | 60053201 |
| 4  | 60006583 | 60015110 | NM_021053    | chr4  | 60008650 | 60009317 |
| 11 | 59845517 | 59859059 | NM_008819    | chr11 | 59851603 | 59852207 |
| 9  | 59745448 | 59754085 | NM_013708    | chr9  | 59746940 | 59747571 |
| 13 | 59713305 | 59721804 | NM_028157    | chr13 | 59721716 | 59722194 |
| 10 | 59714443 | 59722942 | AY563163     | chr10 | 59718462 | 59719382 |
| 1  | 59702825 | 59711682 | NM_007561    | chr1  | 59707973 | 59708725 |
| 13 | 59701225 | 59709724 | NM_183290    | chr13 | 59707189 | 59707776 |
| 1  | 59702825 | 59711682 | NM_007561    | chr1  | 59706394 | 59706986 |
| 2  | 59637956 | 59646455 | BC050873     | chr2  | 59643939 | 59645042 |
| 11 | 59601353 | 59609852 | BC119245     | chr11 | 59603510 | 59603958 |
| 10 | 59581565 | 59595596 | NM_016803    | chr10 | 59589473 | 59590011 |
| 16 | 59578810 | 59587423 | NM_019665    | chr16 | 59580703 | 59581304 |
| 9  | 59499722 | 59508269 | NM_001033498 | chr9  | 59504924 | 59505522 |
| 15 | 59472335 | 59481251 | NM_144549    | chr15 | 59476090 | 59476724 |
| 11 | 59423161 | 59431660 | NM_001011740 | chr11 | 59428735 | 59429410 |
| 10 | 59392196 | 59400695 | NM_026937    | chr10 | 59398801 | 59399401 |
| 11 | 59385434 | 59400831 | NM_001011789 | chr11 | 59387025 | 59387940 |
| 9  | 59381358 | 59389857 | BC057083     | chr9  | 59383580 | 59384272 |
| 11 | 59319608 | 59328416 | NM_172941    | chr11 | 59323432 | 59324026 |
| 9  | 59281790 | 59290620 | NM_019927    | chr9  | 59284408 | 59285028 |
| 3  | 59265544 | 59274043 | NM_032399    | chr3  | 59269142 | 59269756 |
| 16 | 59224252 | 59232751 | NM_146995    | chr16 | 59228921 | 59229548 |
| 3  | 59216001 | 59225257 | NM_133200    | chr3  | 59219533 | 59220405 |
| 11 | 59189349 | 59197848 | NM_001045521 | chr11 | 59191697 | 59192274 |
| 18 | 59181878 | 59190401 | NM_173759    | chr18 | 59186396 | 59187078 |
| 12 | 59123816 | 59132315 | NM_009216    | chr12 | 59131103 | 59131769 |
| 11 | 59104448 | 59112947 | NM_009522    | chr11 | 59109995 | 59110623 |
| 4  | 59078615 | 59087132 | NM_025968    | chr4  | 59081253 | 59081873 |
| 11 | 58991371 | 59014011 | NM_175452    | chr11 | 59002335 | 59003060 |
| 11 | 58991371 | 59014011 | NM_175452    | chr11 | 59000259 | 59001065 |
| 11 | 58991371 | 59014011 | NM_175452    | chr11 | 58998729 | 58999551 |
| 19 | 58990676 | 58999175 | NM_178689    | chr19 | 58992879 | 58993565 |
| 2  | 58955859 | 58964360 | NM_026361    | chr2  | 58959907 | 58960776 |
| 2  | 58958967 | 58967466 | BC062650     | chr2  | 58959907 | 58960776 |
| 6  | 58951581 | 58960080 | NM_153574    | chr6  | 58953238 | 58953889 |
| 19 | 58911696 | 58920234 | NM_175199    | chr19 | 58913501 | 58914128 |
| 1  | 58888545 | 58897044 | NM_172406    | chr1  | 58896005 | 58896581 |
| 11 | 58843205 | 58865307 | BC044882     | chr11 | 58859712 | 58860407 |
| 11 | 58843205 | 58865307 | BC044882     | chr11 | 58856276 | 58857025 |
| 19 | 58845165 | 58853664 | NM_026208    | chr19 | 58852327 | 58853608 |
| 9  | 58832063 | 58840578 | NM_008684    | chr9  | 58839033 | 58839628 |
| 6  | 58834144 | 58842654 | NM_021432    | chr6  | 58837029 | 58837667 |

|    |          |          |              |       |          |          |
|----|----------|----------|--------------|-------|----------|----------|
| 13 | 58810219 | 58820428 | NM_008745    | chr13 | 58815738 | 58816470 |
| 11 | 58759106 | 58773412 | NM_178218    | chr11 | 58770752 | 58771513 |
| 11 | 58768207 | 58776707 | NM_206882    | chr11 | 58770752 | 58771513 |
| 15 | 58761311 | 58769813 | NM_175151    | chr15 | 58766898 | 58767514 |
| 18 | 58675609 | 58684125 | BC115435     | chr18 | 58681772 | 58682461 |
| 11 | 58669630 | 58685934 | NM_172403    | chr11 | 58671170 | 58671732 |
| 11 | 58651311 | 58665852 | NM_146537    | chr11 | 58655537 | 58656196 |
| 16 | 58606835 | 58615393 | NM_007757    | chr16 | 58610945 | 58611710 |
| 7  | 58520201 | 58528700 | NM_009728    | chr7  | 58526407 | 58527078 |
| 2  | 58380044 | 58388543 | L15436       | chr2  | 58381874 | 58382286 |
| 2  | 58350712 | 58359211 | AF332088     | chr2  | 58352712 | 58353318 |
| 2  | 58329046 | 58337545 | NM_007394    | chr2  | 58329203 | 58329812 |
| 9  | 58280740 | 58290244 | NM_176921    | chr9  | 58287569 | 58288277 |
| 6  | 58230875 | 58239374 | NM_053232    | chr6  | 58237392 | 58238289 |
| 13 | 58222716 | 58231259 | NM_152234    | chr13 | 58228227 | 58228941 |
| 13 | 58222716 | 58231259 | NM_152234    | chr13 | 58224970 | 58225757 |
| 11 | 58189241 | 58197751 | NM_027339    | chr11 | 58192385 | 58192997 |
| 13 | 58161277 | 58169802 | NM_198004    | chr13 | 58161970 | 58162531 |
| 2  | 58137694 | 58146193 | NM_001033369 | chr2  | 58141844 | 58142503 |
| 11 | 58131337 | 58151966 | NM_178761    | chr11 | 58132538 | 58133353 |
| 4  | 58100679 | 58109178 | NM_026132    | chr4  | 58100829 | 58101666 |
| 1  | 58051682 | 58060181 | NM_023617    | chr1  | 58058587 | 58059387 |
| 9  | 57997353 | 58006275 | NM_177193    | chr9  | 58002290 | 58003168 |
| 9  | 57997353 | 58006275 | NM_177193    | chr9  | 57999012 | 57999867 |
| 9  | 57997353 | 58006275 | NM_177193    | chr9  | 57997818 | 57998524 |
| 9  | 57954145 | 57963279 | NM_012043    | chr9  | 57961437 | 57962109 |
| 9  | 57954145 | 57963279 | NM_012043    | chr9  | 57955673 | 57956479 |
| 13 | 57915399 | 57923898 | NM_009262    | chr13 | 57915464 | 57916042 |
| 11 | 57861061 | 57879171 | BC053449     | chr11 | 57874197 | 57875107 |
| 2  | 57865617 | 57874227 | NM_029972    | chr2  | 57866196 | 57866923 |
| 6  | 57828069 | 57836568 | NM_134178    | chr6  | 57829850 | 57830711 |
| 15 | 57809993 | 57818492 | NM_173862    | chr15 | 57815890 | 57816725 |
| 15 | 57809993 | 57818492 | NM_173862    | chr15 | 57810589 | 57811178 |
| 19 | 57700223 | 57708722 | BC050020     | chr19 | 57700687 | 57701288 |
| 10 | 57616384 | 57638017 | NM_001034869 | chr10 | 57624060 | 57624843 |
| 12 | 57607651 | 57616210 | NM_011041    | chr12 | 57613541 | 57615140 |
| 10 | 57467338 | 57475854 | NM_021272    | chr10 | 57473692 | 57474324 |
| 10 | 57467338 | 57475854 | NM_021272    | chr10 | 57472297 | 57473048 |
| 12 | 57450619 | 57460920 | NM_009385    | chr12 | 57450988 | 57451841 |
| 3  | 57380303 | 57395848 | NM_008536    | chr3  | 57381789 | 57382657 |
| 11 | 57328860 | 57337401 | NM_145426    | chr11 | 57329690 | 57330356 |
| 19 | 57266783 | 57275282 | NM_178688    | chr19 | 57271577 | 57272190 |
| 19 | 57266783 | 57275282 | NM_178688    | chr19 | 57270519 | 57271302 |
| 10 | 57168878 | 57177400 | NM_008297    | chr10 | 57175626 | 57176217 |
| 10 | 57168878 | 57177400 | NM_008297    | chr10 | 57174511 | 57175144 |
| 6  | 57133436 | 57141935 | NM_053235    | chr6  | 57139756 | 57140320 |
| 16 | 57086181 | 57094691 | NM_023175    | chr16 | 57091361 | 57091970 |

|    |          |          |              |       |          |          |
|----|----------|----------|--------------|-------|----------|----------|
| 18 | 57048202 | 57056917 | NM_177115    | chr18 | 57048865 | 57049464 |
| 17 | 56928788 | 56937334 | NM_134125    | chr17 | 56934836 | 56935629 |
| 19 | 56869214 | 56886897 | NM_001002241 | chr19 | 56883599 | 56884532 |
| 19 | 56869214 | 56886897 | NM_001002241 | chr19 | 56875432 | 56876261 |
| 14 | 56841873 | 56850389 | NM_029492    | chr14 | 56843670 | 56844285 |
| 16 | 56808315 | 56817117 | NM_019631    | chr16 | 56811290 | 56812036 |
| 17 | 56784729 | 56793228 | NM_009404    | chr17 | 56789920 | 56790561 |
| 17 | 56761264 | 56769763 | NM_153551    | chr17 | 56762835 | 56763515 |
| 17 | 56742507 | 56751010 | NM_025877    | chr17 | 56747718 | 56748332 |
| 9  | 56722683 | 56732508 | NM_175483    | chr9  | 56726749 | 56727324 |
| 13 | 56706674 | 56715427 | AF063006     | chr13 | 56713572 | 56714332 |
| 9  | 56657297 | 56665796 | NM_139001    | chr9  | 56658470 | 56659252 |
| 19 | 56526937 | 56535436 | BC051054     | chr19 | 56534038 | 56534748 |
| 13 | 56526111 | 56534629 | NM_178674    | chr13 | 56530558 | 56531154 |
| 13 | 56526111 | 56534629 | NM_178674    | chr13 | 56528101 | 56528820 |
| X  | 56491887 | 56500484 | NM_133197    | chrX  | 56494032 | 56494634 |
| 9  | 56480836 | 56489390 | NM_181074    | chr9  | 56481936 | 56482560 |
| 8  | 56447541 | 56456414 | NM_153581    | chr8  | 56451784 | 56452353 |
| 19 | 56440762 | 56449285 | NM_008733    | chr19 | 56444951 | 56445563 |
| 19 | 56444379 | 56460164 | NM_007611    | chr19 | 56444951 | 56445563 |
| 19 | 56440762 | 56449285 | NM_008733    | chr19 | 56442952 | 56443621 |
| 17 | 56395251 | 56408101 | NM_178926    | chr17 | 56405351 | 56406697 |
| 17 | 56396905 | 56405406 | BC059729     | chr17 | 56405351 | 56406697 |
| 17 | 56395251 | 56408101 | NM_178926    | chr17 | 56404565 | 56405234 |
| 17 | 56396905 | 56405406 | BC059729     | chr17 | 56404565 | 56405234 |
| 16 | 56396851 | 56405350 | NM_001014423 | chr16 | 56402830 | 56403575 |
| 17 | 56395251 | 56408101 | NM_178926    | chr17 | 56402254 | 56402981 |
| 17 | 56396905 | 56405406 | BC059729     | chr17 | 56402254 | 56402981 |
| 16 | 56396851 | 56405350 | NM_001014423 | chr16 | 56400304 | 56401050 |
| 17 | 56395251 | 56408101 | NM_178926    | chr17 | 56395756 | 56397309 |
| 17 | 56396905 | 56405406 | BC059729     | chr17 | 56395756 | 56397309 |
| 17 | 56292334 | 56300890 | NM_153152    | chr17 | 56298654 | 56299329 |
| 12 | 56215391 | 56224414 | BC034876     | chr12 | 56221274 | 56221994 |
| 12 | 56218594 | 56227130 | NM_021529    | chr12 | 56221274 | 56221994 |
| 9  | 56210781 | 56219482 | NM_025812    | chr9  | 56214774 | 56215381 |
| 9  | 56213676 | 56222175 | NM_172924    | chr9  | 56214774 | 56215381 |
| 13 | 56184113 | 56194423 | NM_145976    | chr13 | 56188442 | 56189168 |
| 10 | 56059733 | 56068302 | NM_010288    | chr10 | 56066174 | 56066789 |
| 10 | 56059733 | 56068302 | NM_010288    | chr10 | 56061498 | 56062158 |
| 17 | 55902403 | 55916466 | NM_174989    | chr17 | 55914724 | 55915350 |
| 17 | 55902403 | 55916466 | NM_174989    | chr17 | 55911591 | 55912222 |
| 19 | 55893142 | 55901641 | NM_012022    | chr19 | 55898595 | 55899212 |
| 3  | 55864441 | 55872989 | NM_010750    | chr3  | 55866758 | 55867397 |
| 10 | 55789323 | 55797831 | NM_133751    | chr10 | 55795353 | 55795917 |
| 19 | 55789070 | 55798018 | NM_009333    | chr19 | 55794452 | 55795063 |
| 7  | 55668135 | 55676634 | BC027075     | chr7  | 55668197 | 55668850 |
| 13 | 55656533 | 55665032 | BC026492     | chr13 | 55663860 | 55664752 |

|    |          |          |              |       |          |          |
|----|----------|----------|--------------|-------|----------|----------|
| 12 | 55575625 | 55584198 | NM_134054    | chr12 | 55583409 | 55584024 |
| 17 | 55557776 | 55566381 | NM_009168    | chr17 | 55559323 | 55559925 |
| 3  | 55543828 | 55552435 | AF155821     | chr3  | 55545950 | 55546543 |
| 13 | 55535657 | 55552143 | NM_134059    | chr13 | 55545292 | 55546032 |
| 13 | 55535657 | 55552143 | NM_134059    | chr13 | 55543397 | 55544278 |
| 13 | 55535657 | 55552143 | NM_134059    | chr13 | 55536838 | 55537581 |
| 13 | 55422355 | 55430854 | NM_029303    | chr13 | 55427124 | 55428112 |
| 13 | 55422355 | 55430854 | NM_029303    | chr13 | 55424158 | 55424977 |
| 1  | 55387086 | 55395591 | BC085310     | chr1  | 55388554 | 55389521 |
| 4  | 55365157 | 55373682 | NM_009011    | chr4  | 55369489 | 55370125 |
| 14 | 55313139 | 55321678 | NM_138652    | chr14 | 55318613 | 55319361 |
| 3  | 55263973 | 55272477 | NM_028937    | chr3  | 55266634 | 55267118 |
| 2  | 55245356 | 55255049 | NM_008426    | chr2  | 55252979 | 55253700 |
| 1  | 55168392 | 55177327 | NM_028713    | chr1  | 55169582 | 55170280 |
| 3  | 55140348 | 55148984 | NM_007628    | chr3  | 55144810 | 55145418 |
| 18 | 55112783 | 55123960 | NM_175751    | chr18 | 55113520 | 55114110 |
| 14 | 55111137 | 55119650 | NM_010375    | chr14 | 55113108 | 55113725 |
| 14 | 55072197 | 55080696 | NM_010373    | chr14 | 55075172 | 55076020 |
| 14 | 54990194 | 54998711 | NM_008571    | chr14 | 54992637 | 54993451 |
| 14 | 54982067 | 54990566 | NM_010782    | chr14 | 54986725 | 54987281 |
| 14 | 54982067 | 54990566 | NM_010782    | chr14 | 54981550 | 54982264 |
| 17 | 54915736 | 54924235 | NM_172829    | chr17 | 54921366 | 54922196 |
| 11 | 54803834 | 54812335 | NM_021327    | chr11 | 54805863 | 54806472 |
| 11 | 54803834 | 54812335 | NM_021327    | chr11 | 54803599 | 54804131 |
| 9  | 54746592 | 54755135 | NM_145229    | chr9  | 54750184 | 54750770 |
| 14 | 54709499 | 54722601 | NM_008519    | chr14 | 54717091 | 54717730 |
| 14 | 54709949 | 54718529 | NM_009894    | chr14 | 54717091 | 54717730 |
| 9  | 54709420 | 54717958 | NM_177351    | chr9  | 54711358 | 54711966 |
| 7  | 54697264 | 54706133 | NM_178705    | chr7  | 54698969 | 54700023 |
| 14 | 54664660 | 54673546 | NM_019984    | chr14 | 54665192 | 54665803 |
| 14 | 54623445 | 54631977 | NM_008683    | chr14 | 54630555 | 54631148 |
| 14 | 54611986 | 54620522 | NM_023397    | chr14 | 54612333 | 54613012 |
| 14 | 54585332 | 54603877 | NM_024267    | chr14 | 54594974 | 54595689 |
| 14 | 54585332 | 54603877 | NM_024267    | chr14 | 54590094 | 54590861 |
| 9  | 54556944 | 54565456 | NM_013496    | chr9  | 54563473 | 54564078 |
| 14 | 54536802 | 54551172 | NM_011190    | chr14 | 54550438 | 54551057 |
| 9  | 54527076 | 54538665 | NM_001025375 | chr9  | 54529238 | 54529830 |
| 14 | 54439164 | 54447663 | NM_001024645 | chr14 | 54447640 | 54448322 |
| 15 | 54395568 | 54404071 | NM_178920    | chr15 | 54400619 | 54401301 |
| 13 | 54374974 | 54390709 | NM_009946    | chr13 | 54381427 | 54382085 |
| 6  | 54357300 | 54365799 | NM_198118    | chr6  | 54358003 | 54358638 |
| 15 | 54234853 | 54243352 | NM_173422    | chr15 | 54240720 | 54241686 |
| 11 | 54152326 | 54160858 | NM_001033599 | chr11 | 54159775 | 54160397 |
| 15 | 54105885 | 54114567 | NM_008764    | chr15 | 54108207 | 54108809 |
| 5  | 54091916 | 54100426 | NM_144517    | chr5  | 54096067 | 54096678 |
| 9  | 54078623 | 54087466 | NM_177350    | chr9  | 54084195 | 54084799 |
| 14 | 54066949 | 54077006 | NM_177049    | chr14 | 54068807 | 54069380 |

|   |    |          |                       |       |          |          |
|---|----|----------|-----------------------|-------|----------|----------|
|   | 14 | 54057700 | 54066620 NM_007455    | chr14 | 54064077 | 54064684 |
|   | 19 | 54034764 | 54043263 BC049775     | chr19 | 54040694 | 54041345 |
|   | 3  | 53949200 | 53957735 NM_026435    | chr3  | 53951637 | 53952239 |
|   | 14 | 53864600 | 53873303 NM_021551    | chr14 | 53871090 | 53871694 |
|   | 9  | 53864036 | 53872544 NM_001033535 | chr9  | 53868730 | 53869349 |
|   | 9  | 53864036 | 53872544 NM_001033535 | chr9  | 53865607 | 53866225 |
| X |    | 53848002 | 53856501 NM_001033360 | chrX  | 53850153 | 53850859 |
|   | 11 | 53732522 | 53741083 NM_011396    | chr11 | 53735522 | 53736138 |
|   | 14 | 53638637 | 53647136 NM_023190    | chr14 | 53645937 | 53647106 |
|   | 14 | 53573518 | 53589033 NM_175204    | chr14 | 53586388 | 53587496 |
|   | 14 | 53412352 | 53432934 NM_022993    | chr14 | 53421924 | 53423084 |
|   | 19 | 53357818 | 53366476 NM_001008542 | chr19 | 53358492 | 53359094 |
|   | 5  | 53331605 | 53340104 AF081499     | chr5  | 53337152 | 53337882 |
|   | 15 | 53173109 | 53182266 NM_010162    | chr15 | 53176631 | 53177238 |
|   | 9  | 53140418 | 53148917 NM_212445    | chr9  | 53143062 | 53143673 |
|   | 3  | 53123476 | 53132011 NM_175386    | chr3  | 53131057 | 53131799 |
|   | 5  | 53116383 | 53124899 NM_024213    | chr5  | 53121663 | 53122364 |
|   | 13 | 52990816 | 52999471 NM_017373    | chr13 | 52998154 | 52998889 |
|   | 4  | 52985723 | 52994228 NM_146607    | chr4  | 52992525 | 52993171 |
|   | 17 | 52925751 | 52934250 NM_172497    | chr17 | 52927838 | 52928658 |
| X |    | 52715351 | 52723898 BC052359     | chrX  | 52722009 | 52722627 |
|   | 14 | 52695171 | 52703680 M16119       | chr14 | 52696978 | 52697761 |
|   | 1  | 52669364 | 52677863 NM_178081    | chr1  | 52673765 | 52674365 |
|   | 5  | 52646052 | 52658688 NM_011435    | chr5  | 52656739 | 52657330 |
|   | 18 | 52652461 | 52661072 NM_010728    | chr18 | 52653903 | 52654520 |
|   | 4  | 52611374 | 52619873 NM_026652    | chr4  | 52614632 | 52615249 |
|   | 13 | 52603314 | 52611813 NM_011518    | chr13 | 52609036 | 52609735 |
|   | 13 | 52603314 | 52611813 NM_011518    | chr13 | 52606198 | 52606844 |
|   | 18 | 52585085 | 52593584 NM_026040    | chr18 | 52591170 | 52591782 |
|   | 13 | 52540587 | 52549268 NM_001024474 | chr13 | 52541637 | 52542242 |
|   | 4  | 52485014 | 52493513 U42385       | chr4  | 52485435 | 52485938 |
|   | 10 | 52373020 | 52381519 NM_178675    | chr10 | 52379432 | 52380145 |
|   | 6  | 52237076 | 52245819 NM_007966    | chr6  | 52244919 | 52245549 |
|   | 11 | 52233851 | 52242376 NM_153117    | chr11 | 52241558 | 52242141 |
|   | 11 | 52198538 | 52207037 NM_011694    | chr11 | 52203771 | 52204586 |
|   | 6  | 52128026 | 52170522 NM_008263    | chr6  | 52156099 | 52156705 |
|   | 6  | 52128026 | 52170522 NM_008263    | chr6  | 52135147 | 52135907 |
|   | 6  | 52118787 | 52127286 NM_008265    | chr6  | 52120014 | 52120803 |
|   | 6  | 52085370 | 52100414 NM_010449    | chr6  | 52094606 | 52095215 |
|   | 6  | 52089257 | 52100592 BC094279     | chr6  | 52094606 | 52095215 |
|   | 10 | 52067956 | 52076490 NM_053187    | chr10 | 52070794 | 52071459 |
|   | 11 | 51986855 | 51995354 NM_207227    | chr11 | 51992835 | 51993554 |
|   | 13 | 51853174 | 51861690 NM_011817    | chr13 | 51859022 | 51859611 |
|   | 1  | 51857970 | 51866497 NM_010863    | chr1  | 51858348 | 51858984 |
|   | 3  | 51776054 | 51784553 BC049812     | chr3  | 51783803 | 51784481 |
|   | 13 | 51735372 | 51743871 U69535       | chr13 | 51736005 | 51736432 |
|   | 9  | 51713394 | 51721919 NM_007996    | chr9  | 51715034 | 51715617 |

|    |          |          |              |       |          |          |
|----|----------|----------|--------------|-------|----------|----------|
| 11 | 51698405 | 51706904 | NM_199299    | chr11 | 51697912 | 51698596 |
| 13 | 51651821 | 51666712 | NM_029279    | chr13 | 51665631 | 51666161 |
| 13 | 51651821 | 51666712 | NM_029279    | chr13 | 51660574 | 51661395 |
| 14 | 51410498 | 51418997 | NM_020512    | chr14 | 51417430 | 51418081 |
| 6  | 51393943 | 51402771 | NM_007624    | chr6  | 51398894 | 51399518 |
| 6  | 51396856 | 51405477 | NM_016806    | chr6  | 51398894 | 51399518 |
| 3  | 51362824 | 51371323 | AF256219     | chr3  | 51365090 | 51365725 |
| 14 | 51269496 | 51277995 | NM_001012269 | chr14 | 51271710 | 51272323 |
| 10 | 51163073 | 51171593 | NM_008147    | chr10 | 51170082 | 51170525 |
| 11 | 51110874 | 51119373 | BC002220     | chr11 | 51117645 | 51118268 |
| 14 | 50929492 | 50948684 | NM_027248    | chr14 | 50940871 | 50941526 |
| 14 | 50932816 | 50941315 | NM_001033805 | chr14 | 50940871 | 50941526 |
| 9  | 50862231 | 50870746 | NM_019493    | chr9  | 50868951 | 50869539 |
| 9  | 50862231 | 50870746 | NM_019493    | chr9  | 50864290 | 50865109 |
| 9  | 50862231 | 50870746 | NM_019493    | chr9  | 50863093 | 50863736 |
| 9  | 50851809 | 50861875 | NM_177702    | chr9  | 50853288 | 50853947 |
| 11 | 50844397 | 50852896 | NM_146909    | chr11 | 50850517 | 50851165 |
| 11 | 50806443 | 50814942 | NM_146910    | chr11 | 50813783 | 50814371 |
| 14 | 50769719 | 50778218 | NM_053111    | chr14 | 50776322 | 50777378 |
| 11 | 50757079 | 50765584 | NM_001044697 | chr11 | 50759035 | 50759666 |
| 11 | 50728367 | 50736924 | NM_172794    | chr11 | 50730190 | 50730992 |
| 11 | 50688565 | 50702746 | NM_173372    | chr11 | 50700723 | 50701317 |
| 14 | 50693042 | 50701541 | NM_177544    | chr14 | 50699690 | 50700320 |
| 18 | 50691362 | 50699873 | NM_026108    | chr18 | 50692430 | 50693025 |
| 11 | 50668655 | 50677154 | NM_013922    | chr11 | 50674692 | 50675477 |
| 10 | 50578066 | 50586772 | NM_011376    | chr10 | 50582412 | 50583102 |
| 9  | 50514468 | 50530059 | NM_133981    | chr9  | 50527151 | 50527981 |
| 9  | 50489178 | 50510523 | NM_025865    | chr9  | 50503355 | 50503955 |
| 9  | 50497555 | 50507749 | NM_009964    | chr9  | 50503355 | 50503955 |
| 9  | 50489178 | 50510523 | NM_025865    | chr9  | 50492709 | 50493172 |
| 13 | 50437618 | 50446117 | NM_175401    | chr13 | 50443301 | 50443938 |
| 13 | 50424374 | 50432873 | BC040428     | chr13 | 50429635 | 50430394 |
| 6  | 50309924 | 50318423 | NM_027881    | chr6  | 50312228 | 50312855 |
| 8  | 50171008 | 50179507 | NM_011857    | chr8  | 50175510 | 50176115 |
| 11 | 50166515 | 50175015 | NM_007597    | chr11 | 50169119 | 50169719 |
| 11 | 50063056 | 50078226 | NM_145926    | chr11 | 50077583 | 50078174 |
| 11 | 50063056 | 50078226 | NM_145926    | chr11 | 50067828 | 50068867 |
| 11 | 49862754 | 49871293 | NM_021540    | chr11 | 49864896 | 49865494 |
| 14 | 49844267 | 49858800 | NM_001033271 | chr14 | 49852711 | 49853306 |
| X  | 49796549 | 49805160 | NM_028375    | chrX  | 49796713 | 49797304 |
| 8  | 49602814 | 49611501 | NM_178788    | chr8  | 49607863 | 49608481 |
| 13 | 49588684 | 49597211 | NM_012050    | chr13 | 49593003 | 49593680 |
| 4  | 49525063 | 49533606 | NM_007519    | chr4  | 49530681 | 49531311 |
| 7  | 49502357 | 49510856 | NM_001005232 | chr7  | 49502932 | 49503587 |
| 10 | 49469325 | 49483082 | NM_010349    | chr10 | 49471034 | 49471753 |
| 11 | 49389172 | 49397671 | NM_146469    | chr11 | 49395471 | 49396332 |
| 11 | 49361148 | 49369647 | NM_207574    | chr11 | 49367606 | 49368339 |



|   |    |          |          |              |       |          |          |
|---|----|----------|----------|--------------|-------|----------|----------|
|   | 11 | 49331958 | 49340457 | NM_001011805 | chr11 | 49337592 | 49338475 |
|   | 13 | 49219644 | 49233963 | NM_026738    | chr13 | 49227706 | 49228779 |
|   | 11 | 49117573 | 49126072 | NM_146471    | chr11 | 49119036 | 49119589 |
| X |    | 49014884 | 49023399 | NM_009092    | chrX  | 49016798 | 49017423 |
|   | 11 | 48997439 | 49005938 | NM_146276    | chr11 | 49000235 | 49000832 |
|   | 11 | 48892166 | 48900665 | NM_173434    | chr11 | 48899787 | 48900328 |
|   | 11 | 48892166 | 48900665 | NM_173434    | chr11 | 48899141 | 48899736 |
|   | 11 | 48892166 | 48900665 | NM_173434    | chr11 | 48894112 | 48894884 |
|   | 11 | 48833014 | 48847103 | NM_011579    | chr11 | 48834830 | 48835468 |
|   | 14 | 48815260 | 48829892 | NM_146494    | chr14 | 48822151 | 48822832 |
|   | 8  | 48784529 | 48793028 | BC099949     | chr8  | 48786471 | 48787246 |
|   | 4  | 48678614 | 48687156 | NM_026509    | chr4  | 48681315 | 48681954 |
|   | 6  | 48662633 | 48678381 | NM_175035    | chr6  | 48677787 | 48678126 |
|   | 2  | 48630166 | 48639210 | NM_007396    | chr2  | 48637780 | 48638365 |
|   | 6  | 48599721 | 48618920 | NM_174990    | chr6  | 48611627 | 48612280 |
|   | 16 | 48344863 | 48353431 | NM_010816    | chr16 | 48349184 | 48349955 |
|   | 4  | 48294902 | 48303470 | NM_010569    | chr4  | 48299697 | 48300518 |
|   | 4  | 48298097 | 48306689 | NM_029572    | chr4  | 48299697 | 48300518 |
|   | 16 | 48223896 | 48232598 | NM_028615    | chr16 | 48230843 | 48231429 |
| X |    | 47922597 | 47932229 | NM_001077202 | chrX  | 47930783 | 47931712 |
|   | 17 | 47914490 | 47930401 | NM_152823    | chr17 | 47923161 | 47923809 |
|   | 9  | 47907968 | 47916559 | NM_172921    | chr9  | 47913706 | 47914592 |
|   | 8  | 47790440 | 47799488 | NM_173789    | chr8  | 47798010 | 47798893 |
|   | 19 | 47587832 | 47596372 | NM_175360    | chr19 | 47592535 | 47593132 |
|   | 17 | 47546829 | 47555335 | NM_026625    | chr17 | 47553429 | 47554050 |
|   | 4  | 47492902 | 47501425 | NM_019998    | chr4  | 47500433 | 47501147 |
|   | 4  | 47489761 | 47498300 | NM_024171    | chr4  | 47498019 | 47498505 |
|   | 4  | 47492902 | 47501425 | NM_019998    | chr4  | 47498019 | 47498505 |
|   | 18 | 47491104 | 47500199 | NM_018744    | chr18 | 47491403 | 47492022 |
| X |    | 47447960 | 47456617 | NM_134163    | chrX  | 47452562 | 47453186 |
|   | 19 | 47309478 | 47318114 | NM_177833    | chr19 | 47314810 | 47315397 |
|   | 19 | 47309478 | 47318114 | NM_177833    | chr19 | 47310112 | 47311111 |
|   | 19 | 47276222 | 47284721 | AF401228     | chr19 | 47284093 | 47284696 |
|   | 4  | 47223263 | 47231792 | NM_009928    | chr4  | 47226675 | 47227262 |
|   | 19 | 47189014 | 47197605 | NM_133746    | chr19 | 47196680 | 47197317 |
|   | 19 | 47189014 | 47197605 | NM_133746    | chr19 | 47191097 | 47191873 |
|   | 19 | 47175600 | 47184586 | BC051231     | chr19 | 47184124 | 47184741 |
|   | 6  | 47168033 | 47176540 | NM_025771    | chr6  | 47172721 | 47173416 |
|   | 13 | 47127692 | 47136191 | NM_146042    | chr13 | 47133420 | 47134037 |
|   | 7  | 46998201 | 47007706 | NM_013643    | chr7  | 47003722 | 47004450 |
|   | 19 | 46936319 | 46944818 | BC006028     | chr19 | 46940996 | 46941746 |
|   | 7  | 46785416 | 46793957 | NM_021884    | chr7  | 46792314 | 46792956 |
|   | 17 | 46771140 | 46779685 | NM_172622    | chr17 | 46777691 | 46778670 |
|   | 17 | 46751260 | 46759759 | AY081774     | chr17 | 46756836 | 46757455 |
|   | 19 | 46723685 | 46732285 | NM_007809    | chr19 | 46728058 | 46728642 |
|   | 7  | 46598087 | 46617022 | NM_011316    | chr7  | 46614334 | 46615223 |
|   | 7  | 46613875 | 46622385 | NM_011314    | chr7  | 46614334 | 46615223 |

|   |    |          |                       |       |          |          |
|---|----|----------|-----------------------|-------|----------|----------|
|   | 4  | 46554741 | 46569902 NM_029077    | chr4  | 46567455 | 46568036 |
|   | 8  | 46561954 | 46570453 NM_008639    | chr8  | 46563689 | 46564204 |
|   | 4  | 46466199 | 46474726 NM_130889    | chr4  | 46469431 | 46470122 |
|   | 4  | 46432075 | 46440578 BC050798     | chr4  | 46439026 | 46439632 |
|   | 19 | 46404191 | 46412744 NM_029186    | chr19 | 46410331 | 46410919 |
|   | 19 | 46375520 | 46384019 NM_133694    | chr19 | 46379336 | 46379987 |
|   | 19 | 46377968 | 46386467 NM_028627    | chr19 | 46379336 | 46379987 |
|   | 7  | 46293767 | 46302266 BC100546     | chr7  | 46297592 | 46298189 |
| X |    | 46252363 | 46260862 NM_146390    | chrX  | 46254879 | 46255508 |
|   | 7  | 46238516 | 46247081 NM_010866    | chr7  | 46245911 | 46246530 |
|   | 7  | 46238516 | 46247081 NM_010866    | chr7  | 46244513 | 46245383 |
|   | 7  | 46238516 | 46247081 NM_010866    | chr7  | 46240648 | 46241275 |
|   | 17 | 46212892 | 46221392 NM_028065    | chr17 | 46219456 | 46220501 |
|   | 17 | 46134947 | 46150095 NM_027910    | chr17 | 46146744 | 46147447 |
|   | 17 | 46138300 | 46147306 NM_010787    | chr17 | 46146744 | 46147447 |
|   | 19 | 46123174 | 46131823 NM_001039352 | chr19 | 46129597 | 46130069 |
|   | 17 | 46117357 | 46127477 BC026946     | chr17 | 46122166 | 46122882 |
|   | 17 | 46117357 | 46127477 BC026946     | chr17 | 46116850 | 46117620 |
|   | 17 | 46103437 | 46116028 NM_025611    | chr17 | 46112158 | 46112747 |
|   | 17 | 46105834 | 46114344 NM_029091    | chr17 | 46112158 | 46112747 |
|   | 19 | 46090031 | 46104225 NM_010697    | chr19 | 46097007 | 46097668 |
|   | 19 | 46090031 | 46104225 NM_010697    | chr19 | 46093182 | 46093800 |
|   | 16 | 46071885 | 46080384 BC015304     | chr16 | 46073211 | 46073950 |
|   | 9  | 46013603 | 46026677 NM_080434    | chr9  | 46020904 | 46021557 |
|   | 9  | 45949199 | 45957698 BC082313     | chr9  | 45956272 | 45956901 |
|   | 7  | 45916628 | 45925127 BC033923     | chr7  | 45916934 | 45917785 |
|   | 19 | 45866615 | 45875333 NM_145703    | chr19 | 45867916 | 45868593 |
|   | 19 | 45793580 | 45808897 NM_010205    | chr19 | 45804915 | 45805515 |
|   | 19 | 45793580 | 45808897 NM_010205    | chr19 | 45798368 | 45799108 |
|   | 19 | 45793580 | 45808897 NM_010205    | chr19 | 45796470 | 45797224 |
|   | 9  | 45757873 | 45766372 NM_027498    | chr9  | 45762807 | 45763488 |
|   | 16 | 45761216 | 45769715 NM_153412    | chr16 | 45761270 | 45761880 |
|   | 7  | 45759117 | 45767616 NM_144801    | chr7  | 45760633 | 45761216 |
|   | 14 | 45741550 | 45758367 NM_022023    | chr14 | 45748176 | 45748791 |
|   | 14 | 45748108 | 45756620 NM_026832    | chr14 | 45748176 | 45748791 |
|   | 9  | 45703473 | 45712242 NM_172257    | chr9  | 45709158 | 45709776 |
|   | 7  | 45690230 | 45704986 NM_145963    | chr7  | 45702352 | 45702937 |
|   | 7  | 45690230 | 45704986 NM_145963    | chr7  | 45695052 | 45695635 |
|   | 9  | 45684383 | 45692893 NM_011526    | chr9  | 45692275 | 45692872 |
|   | 9  | 45684383 | 45692893 NM_011526    | chr9  | 45690670 | 45691379 |
|   | 9  | 45651564 | 45662050 NM_008794    | chr9  | 45660239 | 45660894 |
|   | 9  | 45653418 | 45663882 NM_178709    | chr9  | 45660239 | 45660894 |
|   | 7  | 45580199 | 45599855 NM_020011    | chr7  | 45594116 | 45594804 |
|   | 17 | 45568576 | 45577084 NM_026768    | chr17 | 45576077 | 45576692 |
|   | 7  | 45562009 | 45575825 NM_016974    | chr7  | 45570512 | 45571166 |
|   | 7  | 45545101 | 45553600 NM_019934    | chr7  | 45545927 | 45546492 |
|   | 9  | 45524444 | 45532943 BC066145     | chr9  | 45532469 | 45532924 |

|    |          |                       |       |          |          |
|----|----------|-----------------------|-------|----------|----------|
| 16 | 45523755 | 45532307 NM_008099    | chr16 | 45527384 | 45528001 |
| 9  | 45524444 | 45532943 BC066145     | chr9  | 45527224 | 45528176 |
| 16 | 45523755 | 45532307 NM_008099    | chr16 | 45524955 | 45525647 |
| 7  | 45479648 | 45512317 NM_028544    | chr7  | 45503515 | 45504133 |
| 7  | 45479648 | 45512317 NM_028544    | chr7  | 45482864 | 45483593 |
| 7  | 45481032 | 45489532 NM_020013    | chr7  | 45482864 | 45483593 |
| 7  | 45354323 | 45362838 NM_027903    | chr7  | 45354439 | 45355043 |
| 7  | 45299824 | 45312138 NM_011304    | chr7  | 45299450 | 45300071 |
| 7  | 45268002 | 45291487 NM_010596    | chr7  | 45287270 | 45287851 |
| 7  | 45232469 | 45244625 NM_029741    | chr7  | 45238106 | 45238921 |
| 8  | 45195811 | 45204310 NM_145745    | chr8  | 45196544 | 45197127 |
| 9  | 45115180 | 45123933 NM_022004    | chr9  | 45121910 | 45122744 |
| 5  | 45085368 | 45093955 NM_001077398 | chr5  | 45092562 | 45093196 |
| 19 | 45053869 | 45077200 NM_153796    | chr19 | 45060339 | 45060941 |
| 19 | 45057245 | 45065753 NM_053164    | chr19 | 45060339 | 45060941 |
| 9  | 45017632 | 45026141 NM_008348    | chr9  | 45021828 | 45022723 |
| 7  | 45016396 | 45040099 NM_182993    | chr7  | 45021611 | 45022391 |
| 7  | 45020081 | 45028580 NM_145954    | chr7  | 45021611 | 45022391 |
| 9  | 45017632 | 45026141 NM_008348    | chr9  | 45019224 | 45019876 |
| 7  | 44989923 | 45018697 NM_013520    | chr7  | 45014723 | 45015471 |
| 16 | 45007385 | 45015995 NM_026439    | chr16 | 45013239 | 45013858 |
| 7  | 44989923 | 45018697 NM_013520    | chr7  | 45012304 | 45013149 |
| 16 | 45007385 | 45015995 NM_026439    | chr16 | 45009237 | 45010260 |
| 4  | 44996504 | 45005036 NM_080289    | chr4  | 44998123 | 44998722 |
| 7  | 44899937 | 44908436 BC025846     | chr7  | 44903195 | 44903797 |
| 7  | 44879947 | 44890309 NM_001008422 | chr7  | 44881291 | 44881936 |
| 7  | 44880032 | 44888554 NM_009101    | chr7  | 44881291 | 44881936 |
| 7  | 44859702 | 44868490 NM_016849    | chr7  | 44862248 | 44862818 |
| 19 | 44804705 | 44813204 NM_011037    | chr19 | 44809006 | 44809650 |
| 19 | 44804705 | 44813204 NM_011037    | chr19 | 44807297 | 44807990 |
| 7  | 44711269 | 44727885 NM_026270    | chr7  | 44711602 | 44712343 |
| 9  | 44669174 | 44677705 BC086880     | chr9  | 44671269 | 44671875 |
| 16 | 44637631 | 44646135 NM_145972    | chr16 | 44644374 | 44645127 |
| 7  | 44610671 | 44622654 NM_133945    | chr7  | 44620000 | 44620926 |
| 2  | 44575876 | 44584375 BC052069     | chr2  | 44582894 | 44583517 |
| 19 | 44540783 | 44549350 NM_011720    | chr19 | 44544761 | 44545357 |
| 9  | 44483690 | 44493942 NM_153537    | chr9  | 44484913 | 44485511 |
| 16 | 44475650 | 44484202 NM_172506    | chr16 | 44476146 | 44477011 |
| 7  | 44452928 | 44461661 NM_008422    | chr7  | 44455573 | 44456168 |
| 9  | 44442948 | 44451447 BC025856     | chr9  | 44448294 | 44449276 |
| 9  | 44442948 | 44451447 BC025856     | chr9  | 44444976 | 44445574 |
| 7  | 44408980 | 44427965 NM_011131    | chr7  | 44409189 | 44410003 |
| 7  | 44390177 | 44406113 NM_178067    | chr7  | 44403270 | 44403880 |
| X  | 44347502 | 44356187 NM_133213    | chrX  | 44355031 | 44356005 |
| X  | 44347502 | 44356187 NM_133213    | chrX  | 44348877 | 44349543 |
| 7  | 44327477 | 44338692 NM_026690    | chr7  | 44334641 | 44335379 |
| 7  | 44327477 | 44338692 NM_026690    | chr7  | 44331674 | 44332312 |

|    |          |          |              |       |          |          |
|----|----------|----------|--------------|-------|----------|----------|
| 7  | 44327477 | 44338692 | NM_026690    | chr7  | 44328222 | 44330050 |
| 15 | 44281627 | 44290126 | NM_138674    | chr15 | 44288245 | 44288901 |
| 9  | 44274917 | 44283416 | NM_007551    | chr9  | 44279818 | 44280322 |
| 9  | 44274917 | 44283416 | NM_007551    | chr9  | 44274992 | 44275582 |
| 9  | 44244131 | 44262370 | NM_030256    | chr9  | 44258232 | 44258918 |
| 7  | 44172437 | 44180944 | NM_009131    | chr7  | 44172454 | 44173231 |
| 9  | 44068349 | 44077280 | NM_027909    | chr9  | 44068452 | 44069051 |
| 9  | 44051085 | 44062629 | NM_172162    | chr9  | 44061698 | 44062466 |
| 9  | 44016894 | 44025393 | NM_178420    | chr9  | 44024536 | 44025129 |
| 9  | 43999956 | 44008459 | NM_133226    | chr9  | 44000833 | 44001605 |
| 7  | 43964334 | 43972833 | NM_010642    | chr7  | 43969891 | 43970481 |
| 9  | 43879666 | 43888165 | NM_023061    | chr9  | 43886647 | 43887634 |
| 4  | 43869392 | 43877891 | NM_019473    | chr4  | 43875336 | 43876087 |
| 9  | 43846837 | 43860808 | NM_147126    | chr9  | 43852960 | 43853635 |
| 4  | 43840034 | 43848538 | NM_019474    | chr4  | 43843045 | 43843467 |
| 14 | 43778753 | 43787252 | NM_008962    | chr14 | 43779838 | 43781333 |
| 1  | 43769793 | 43778294 | NM_026430    | chr1  | 43771966 | 43772679 |
| 4  | 43742298 | 43753633 | NM_027789    | chr4  | 43750829 | 43751420 |
| 7  | 43743202 | 43751741 | NM_019928    | chr7  | 43747610 | 43748225 |
| 19 | 43716786 | 43725285 | BC023172     | chr19 | 43720000 | 43720717 |
| 19 | 43659636 | 43668135 | NM_008699    | chr19 | 43659998 | 43660585 |
| 17 | 43645627 | 43654141 | NM_172621    | chr17 | 43649726 | 43650387 |
| 10 | 43584222 | 43593007 | NM_130892    | chr10 | 43590134 | 43590988 |
| 10 | 43587643 | 43596151 | BC070459     | chr10 | 43590134 | 43590988 |
| 4  | 43577734 | 43586277 | NM_013497    | chr4  | 43584250 | 43584842 |
| 4  | 43580856 | 43589355 | NM_011602    | chr4  | 43584250 | 43584842 |
| 7  | 43534073 | 43542572 | NM_145582    | chr7  | 43540199 | 43540852 |
| 7  | 43525688 | 43534285 | NM_031181    | chr7  | 43529879 | 43530477 |
| 18 | 43515892 | 43524655 | NM_009468    | chr18 | 43521157 | 43521724 |
| 18 | 43515892 | 43524655 | NM_009468    | chr18 | 43516477 | 43517282 |
| 7  | 43496781 | 43505280 | NM_028236    | chr7  | 43499999 | 43500541 |
| 1  | 43472096 | 43480595 | BC011071     | chr1  | 43479970 | 43480552 |
| 7  | 43469267 | 43480340 | NM_028913    | chr7  | 43479515 | 43480011 |
| 16 | 43421595 | 43432139 | NM_019778    | chr16 | 43425043 | 43425668 |
| 17 | 43410054 | 43418959 | NM_030598    | chr17 | 43414428 | 43415046 |
| 10 | 43261584 | 43270103 | NM_009846    | chr10 | 43263226 | 43263854 |
| 13 | 43127811 | 43139359 | NM_001005748 | chr13 | 43132091 | 43132690 |
| 6  | 43090667 | 43106058 | NM_146652    | chr6  | 43105323 | 43105739 |
| 1  | 43095289 | 43103801 | AF153340     | chr1  | 43102939 | 43103623 |
| 6  | 43076869 | 43085368 | NM_146654    | chr6  | 43083075 | 43083748 |
| 4  | 43044357 | 43073303 | NM_020035    | chr4  | 43062096 | 43062667 |
| 4  | 43044357 | 43073303 | NM_020035    | chr4  | 43054907 | 43055506 |
| 4  | 43019012 | 43027555 | NM_009503    | chr4  | 43023943 | 43024936 |
| 17 | 42964656 | 42973156 | NM_008585    | chr17 | 42966442 | 42967042 |
| 19 | 42829457 | 42839276 | NM_019424    | chr19 | 42831939 | 42832691 |
| 4  | 42775779 | 42784278 | NM_011888    | chr4  | 42777614 | 42779172 |
| 17 | 42729599 | 42738098 | NM_133776    | chr17 | 42735407 | 42736299 |

|    |          |          |              |       |          |          |
|----|----------|----------|--------------|-------|----------|----------|
| 17 | 42729599 | 42738098 | NM_133776    | chr17 | 42729900 | 42730852 |
| 10 | 42708824 | 42717323 | BC058972     | chr10 | 42713502 | 42714138 |
| 18 | 42703106 | 42711625 | NM_181543    | chr18 | 42706312 | 42706913 |
| 13 | 42685595 | 42694282 | NM_198419    | chr13 | 42693144 | 42694018 |
| 6  | 42667646 | 42676145 | NM_001011799 | chr6  | 42673532 | 42674396 |
| 19 | 42659360 | 42672059 | NM_053083    | chr19 | 42660078 | 42660675 |
| 1  | 42635692 | 42644191 | NM_008900    | chr1  | 42640206 | 42641089 |
| 8  | 42610985 | 42619484 | BC089009     | chr8  | 42618580 | 42619246 |
| 18 | 42560952 | 42569451 | BC089582     | chr18 | 42565607 | 42566202 |
| 18 | 42514616 | 42523115 | NM_138945    | chr18 | 42521340 | 42522034 |
| 19 | 42482595 | 42491094 | NM_145123    | chr19 | 42483378 | 42484149 |
| 8  | 42419058 | 42427557 | NM_026840    | chr8  | 42423060 | 42423716 |
| 19 | 42374659 | 42383158 | BC024472     | chr19 | 42376487 | 42377163 |
| 6  | 42358142 | 42366641 | NM_207028    | chr6  | 42365021 | 42365834 |
| 18 | 42353501 | 42362000 | BC006060     | chr18 | 42360535 | 42361283 |
| 18 | 42320145 | 42328659 | BC110559     | chr18 | 42321621 | 42322205 |
| 16 | 42257375 | 42265983 | NM_008083    | chr16 | 42262074 | 42262697 |
| 6  | 42210292 | 42218826 | NM_013491    | chr6  | 42215923 | 42216663 |
| 6  | 42185566 | 42197147 | NM_007610    | chr6  | 42189725 | 42190441 |
| 18 | 42173640 | 42182182 | NM_172966    | chr18 | 42180264 | 42181135 |
| 19 | 41980819 | 41989325 | NM_023740    | chr19 | 41985256 | 41985864 |
| 19 | 41984106 | 41992607 | NM_025644    | chr19 | 41985256 | 41985864 |
| 4  | 41956224 | 41968645 | NM_001048179 | chr4  | 41964013 | 41964879 |
| 4  | 41956224 | 41968645 | NM_001048179 | chr4  | 41958522 | 41959241 |
| 4  | 41927285 | 41935824 | NM_011014    | chr4  | 41927510 | 41928102 |
| 19 | 41898907 | 41907443 | NM_177603    | chr19 | 41904372 | 41904978 |
| 4  | 41826132 | 41834974 | BC021944     | chr4  | 41828515 | 41829115 |
| 4  | 41752465 | 41760964 | NM_175138    | chr4  | 41756942 | 41757659 |
| 4  | 41755681 | 41764180 | NM_027993    | chr4  | 41756942 | 41757659 |
| 4  | 41703505 | 41712004 | NM_001048005 | chr4  | 41706896 | 41707566 |
| 4  | 41689229 | 41702435 | NM_028624    | chr4  | 41700623 | 41701539 |
| 3  | 41671744 | 41680243 | NM_172303    | chr3  | 41671817 | 41672378 |
| 3  | 41646281 | 41662509 | BC020316     | chr3  | 41661386 | 41661974 |
| 13 | 41654417 | 41662916 | NM_177808    | chr13 | 41658117 | 41658780 |
| 13 | 41495756 | 41504270 | NM_017464    | chr13 | 41501205 | 41501824 |
| 4  | 41318687 | 41327191 | NM_026275    | chr4  | 41323892 | 41324476 |
| 7  | 41164033 | 41172532 | BC099396     | chr7  | 41165572 | 41166659 |
| 19 | 41127884 | 41136424 | NM_153520    | chr19 | 41132902 | 41133494 |
| 6  | 41039614 | 41048113 | BC089553     | chr6  | 41043824 | 41044421 |
| X  | 41032129 | 41040778 | NM_178739    | chrX  | 41032974 | 41033578 |
| 3  | 40984826 | 40993325 | NM_026622    | chr3  | 40989255 | 40989890 |
| 4  | 40961938 | 40970444 | NM_025498    | chr4  | 40970058 | 40970395 |
| 3  | 40940835 | 40957774 | NM_028140    | chr3  | 40942630 | 40943225 |
| 19 | 40878590 | 40887118 | NM_172839    | chr19 | 40884748 | 40885495 |
| 10 | 40757500 | 40765999 | NM_199058    | chr10 | 40758796 | 40759598 |
| 7  | 40666353 | 40674852 | NM_021387    | chr7  | 40673947 | 40674588 |
| 7  | 40666353 | 40674852 | NM_021387    | chr7  | 40671206 | 40672012 |

|    |          |          |              |       |          |          |
|----|----------|----------|--------------|-------|----------|----------|
| 1  | 40620171 | 40628757 | NM_001033289 | chr1  | 40626099 | 40626697 |
| 1  | 40620171 | 40628757 | NM_001033289 | chr1  | 40620904 | 40621644 |
| 10 | 40569034 | 40577533 | BC061220     | chr10 | 40577155 | 40577509 |
| 11 | 40571091 | 40579822 | NM_026023    | chr11 | 40571751 | 40572561 |
| 17 | 40392191 | 40402816 | NM_008650    | chr17 | 40401707 | 40402346 |
| 17 | 40395469 | 40404035 | NM_031863    | chr17 | 40401707 | 40402346 |
| 10 | 40365739 | 40374238 | NM_177793    | chr10 | 40370254 | 40371001 |
| 10 | 40313427 | 40323519 | NM_027442    | chr10 | 40319165 | 40320082 |
| 14 | 40089349 | 40099876 | NM_009160    | chr14 | 40094141 | 40094978 |
| 14 | 40089349 | 40099876 | NM_009160    | chr14 | 40093017 | 40093920 |
| 18 | 39893471 | 39901991 | NM_011033    | chr18 | 39900255 | 39900861 |
| 18 | 39893471 | 39901991 | NM_011033    | chr18 | 39894549 | 39895004 |
| 9  | 39818868 | 39827367 | NM_146854    | chr9  | 39823743 | 39824550 |
| 9  | 39749322 | 39763600 | NM_147108    | chr9  | 39750711 | 39751548 |
| 9  | 39686833 | 39695332 | NM_147107    | chr9  | 39689483 | 39690089 |
| 15 | 39684963 | 39693541 | NM_022722    | chr15 | 39687687 | 39688314 |
| 10 | 39673563 | 39682062 | NM_001001489 | chr10 | 39680464 | 39680837 |
| 1  | 39344957 | 39355915 | U88873       | chr1  | 39353294 | 39353725 |
| 1  | 39306695 | 39315194 | NM_053257    | chr1  | 39313012 | 39313751 |
| 5  | 39162440 | 39171061 | NM_013748    | chr5  | 39164004 | 39164616 |
| 10 | 39138331 | 39146830 | BC032149     | chr10 | 39145470 | 39145980 |
| 9  | 39138364 | 39146863 | NM_001011812 | chr9  | 39143294 | 39144066 |
| 3  | 39072489 | 39080988 | NM_183221    | chr3  | 39078512 | 39079113 |
| 15 | 38937006 | 38945505 | NM_198606    | chr15 | 38942416 | 38943025 |
| 15 | 38940213 | 38948712 | NM_172402    | chr15 | 38942416 | 38943025 |
| 2  | 38884235 | 38893538 | NM_029793    | chr2  | 38892625 | 38893237 |
| 6  | 38842593 | 38851221 | NM_011539    | chr6  | 38848769 | 38849563 |
| 9  | 38731114 | 38739613 | NM_146442    | chr9  | 38737743 | 38738359 |
| 9  | 38674660 | 38683161 | NM_146272    | chr9  | 38679542 | 38680276 |
| 5  | 38542477 | 38551134 | NM_025480    | chr5  | 38545262 | 38545911 |
| 13 | 38533363 | 38541926 | NM_145367    | chr13 | 38536389 | 38537367 |
| 16 | 38369381 | 38377922 | NM_007414    | chr16 | 38369406 | 38370088 |
| 16 | 38211311 | 38220062 | NM_010936    | chr16 | 38216771 | 38217451 |
| 13 | 38197950 | 38214932 | NM_026382    | chr13 | 38205143 | 38205761 |
| 19 | 38187434 | 38196392 | NM_011255    | chr19 | 38195948 | 38196622 |
| 19 | 38191925 | 38200424 | NM_033614    | chr19 | 38195948 | 38196622 |
| 9  | 38147447 | 38155946 | NM_146869    | chr9  | 38151039 | 38151641 |
| 5  | 38110119 | 38118834 | NM_010835    | chr5  | 38117196 | 38117782 |
| 6  | 38051489 | 38060182 | NM_080467    | chr6  | 38058115 | 38058711 |
| 7  | 37928756 | 37943047 | NM_024413    | chr7  | 37930119 | 37931559 |
| 3  | 37900259 | 37908777 | NM_024175    | chr3  | 37907005 | 37908009 |
| 9  | 37853259 | 37868868 | NM_146424    | chr9  | 37867053 | 37867651 |
| 18 | 37794309 | 37822874 | NM_033586    | chr18 | 37812981 | 37813588 |
| 18 | 37794309 | 37822874 | NM_033586    | chr18 | 37794833 | 37795447 |
| 18 | 37776379 | 37790418 | NM_033585    | chr18 | 37789264 | 37790115 |
| 18 | 37762040 | 37776140 | NM_175770    | chr18 | 37763532 | 37764176 |
| 19 | 37756998 | 37765527 | NM_007811    | chr19 | 37761603 | 37762831 |

|   |    |          |                       |       |          |          |
|---|----|----------|-----------------------|-------|----------|----------|
|   | 15 | 37734497 | 37742996 NM_134094    | chr15 | 37734948 | 37735562 |
|   | 18 | 37633626 | 37646832 NM_053147    | chr18 | 37644451 | 37645267 |
| X |    | 37639983 | 37648640 NM_016886    | chrX  | 37640920 | 37641564 |
|   | 18 | 37593514 | 37632802 NM_053143    | chr18 | 37624534 | 37625122 |
|   | 3  | 37605847 | 37614346 NM_021343    | chr3  | 37612460 | 37613071 |
|   | 3  | 37566304 | 37574803 AY027557     | chr3  | 37572755 | 37573391 |
|   | 18 | 37541392 | 37549891 NM_053136    | chr18 | 37548848 | 37549814 |
|   | 18 | 37531648 | 37540147 NM_053135    | chr18 | 37539081 | 37539820 |
|   | 3  | 37534399 | 37542898 NM_008006    | chr3  | 37537135 | 37538130 |
|   | 9  | 37516332 | 37524831 NM_146749    | chr9  | 37522391 | 37522984 |
|   | 9  | 37489807 | 37498306 NM_146882    | chr9  | 37496364 | 37496980 |
|   | 19 | 37493985 | 37502497 NM_008245    | chr19 | 37494723 | 37495535 |
|   | 18 | 37475245 | 37483744 NM_053133    | chr18 | 37482566 | 37483200 |
|   | 7  | 37476013 | 37487517 NM_172385    | chr7  | 37479091 | 37479767 |
|   | 18 | 37454002 | 37470213 NM_053132    | chr18 | 37469166 | 37470138 |
|   | 9  | 37459449 | 37467948 NM_030553    | chr9  | 37462584 | 37463171 |
|   | 17 | 37407122 | 37415621 NM_147062    | chr17 | 37414244 | 37414828 |
|   | 15 | 37401426 | 37409932 BC011162     | chr15 | 37404305 | 37405241 |
|   | 5  | 37333165 | 37341664 NM_178394    | chr5  | 37336028 | 37336897 |
|   | 2  | 37242406 | 37258872 NM_146253    | chr2  | 37250505 | 37251111 |
|   | 15 | 37171625 | 37180404 NM_026496    | chr15 | 37177347 | 37178107 |
|   | 5  | 37150819 | 37159318 NM_172994    | chr5  | 37151976 | 37152602 |
|   | 18 | 37087605 | 37102275 NM_001003672 | chr18 | 37099940 | 37100572 |
|   | 1  | 37092390 | 37100889 NM_027580    | chr1  | 37097844 | 37098449 |
|   | 18 | 37072649 | 37081214 NM_007766    | chr18 | 37078375 | 37078992 |
|   | 13 | 37054171 | 37062670 NM_028784    | chr13 | 37060170 | 37061201 |
|   | 18 | 36906595 | 36915150 NM_008214    | chr18 | 36915059 | 36915678 |
|   | 18 | 36906595 | 36915150 NM_008214    | chr18 | 36913057 | 36913661 |
|   | 5  | 36886635 | 36907919 NM_133910    | chr5  | 36901888 | 36902471 |
|   | 18 | 36889689 | 36898188 NM_173383    | chr18 | 36897056 | 36897616 |
|   | 18 | 36889689 | 36898188 NM_173383    | chr18 | 36895910 | 36896641 |
|   | 12 | 36885785 | 36894447 NM_178629    | chr12 | 36893815 | 36894320 |
|   | 18 | 36880213 | 36890541 NM_026464    | chr18 | 36889498 | 36890277 |
|   | 18 | 36889689 | 36898188 NM_173383    | chr18 | 36889498 | 36890277 |
|   | 3  | 36860653 | 36869152 NM_019510    | chr3  | 36862669 | 36863652 |
|   | 8  | 36838258 | 36846757 NM_177741    | chr8  | 36843871 | 36844465 |
|   | 17 | 36827144 | 36835643 NM_146514    | chr17 | 36832757 | 36833362 |
|   | 10 | 36825804 | 36834342 NM_008538    | chr10 | 36829542 | 36830142 |
|   | 19 | 36796991 | 36807797 NM_016854    | chr19 | 36805097 | 36805653 |
|   | 5  | 36795683 | 36804198 NM_025725    | chr5  | 36795831 | 36797001 |
|   | 11 | 36785167 | 36793666 NM_011856    | chr11 | 36788355 | 36788959 |
|   | 17 | 36776199 | 36784698 BC104057     | chr17 | 36778843 | 36779456 |
|   | 2  | 36753130 | 36761629 NM_146624    | chr2  | 36760740 | 36761602 |
|   | 17 | 36717534 | 36726033 NM_146456    | chr17 | 36719908 | 36720501 |
|   | 17 | 36691790 | 36707925 NM_182714    | chr17 | 36706999 | 36707698 |
|   | 12 | 36661419 | 36669955 NM_146033    | chr12 | 36665417 | 36666017 |
|   | 12 | 36664488 | 36673086 NM_025840    | chr12 | 36665417 | 36666017 |

|    |          |          |              |       |          |          |
|----|----------|----------|--------------|-------|----------|----------|
| 1  | 36630033 | 36638532 | NM_009942    | chr1  | 36635902 | 36636495 |
| 2  | 36602536 | 36617746 | NM_146944    | chr2  | 36609337 | 36610044 |
| 17 | 36586791 | 36603577 | NM_029747    | chr17 | 36590024 | 36590623 |
| 9  | 36576480 | 36584986 | NM_183171    | chr9  | 36576495 | 36577085 |
| 16 | 36478874 | 36487373 | NM_013803    | chr16 | 36479703 | 36480744 |
| 1  | 36450422 | 36459852 | NM_001039551 | chr1  | 36453051 | 36453663 |
| 1  | 36410166 | 36419030 | NM_033570    | chr1  | 36417997 | 36418602 |
| 2  | 36384609 | 36393108 | NM_146628    | chr2  | 36390711 | 36391305 |
| 16 | 36372115 | 36380631 | NM_025288    | chr16 | 36372905 | 36373491 |
| 2  | 36299638 | 36308137 | NM_146950    | chr2  | 36304774 | 36305372 |
| 3  | 36251549 | 36260127 | NM_172678    | chr3  | 36258132 | 36258816 |
| 5  | 36204180 | 36212679 | NM_027373    | chr5  | 36211976 | 36212591 |
| 5  | 36204180 | 36212679 | NM_027373    | chr5  | 36210835 | 36211472 |
| 19 | 36119980 | 36128504 | NM_008315    | chr19 | 36124134 | 36124732 |
| 12 | 36117477 | 36126061 | NM_013464    | chr12 | 36119456 | 36120047 |
| 5  | 36068792 | 36077326 | NM_177678    | chr5  | 36076126 | 36076873 |
| 5  | 36038308 | 36046958 | NM_194344    | chr5  | 36042698 | 36043514 |
| 5  | 35993834 | 36002643 | NM_030127    | chr5  | 36000847 | 36001449 |
| 18 | 35978507 | 35987006 | BC016207     | chr18 | 35985608 | 35986217 |
| 18 | 35978507 | 35987006 | BC016207     | chr18 | 35984199 | 35984821 |
| 14 | 35957690 | 35966205 | NM_021340    | chr14 | 35965724 | 35966473 |
| 14 | 35960076 | 35968575 | NM_146245    | chr14 | 35965724 | 35966473 |
| 17 | 35931704 | 35940203 | NM_013544    | chr17 | 35937387 | 35938128 |
| 2  | 35923504 | 35933280 | NM_008500    | chr2  | 35931494 | 35932334 |
| 17 | 35863410 | 35871909 | NM_026308    | chr17 | 35866968 | 35867688 |
| 18 | 35863954 | 35872504 | BC046640     | chr18 | 35866103 | 35866700 |
| 7  | 35821007 | 35829514 | BC106165     | chr7  | 35827851 | 35828493 |
| 7  | 35821007 | 35829514 | BC106165     | chr7  | 35826585 | 35827162 |
| 18 | 35772829 | 35794160 | NM_027222    | chr18 | 35793287 | 35793745 |
| 16 | 35758768 | 35767267 | BC021340     | chr16 | 35760774 | 35761358 |
| 17 | 35726964 | 35735497 | NM_010395    | chr17 | 35731845 | 35732433 |
| 17 | 35726964 | 35735497 | NM_010395    | chr17 | 35728713 | 35729242 |
| 2  | 35477501 | 35486000 | AY305656     | chr2  | 35481588 | 35482178 |
| 5  | 35352417 | 35360948 | NM_019447    | chr5  | 35353733 | 35354434 |
| 18 | 35338393 | 35346892 | NM_178005    | chr18 | 35339521 | 35340114 |
| 17 | 35267767 | 35287767 | NM_175137    | chr17 | 35267996 | 35268722 |
| 6  | 35253763 | 35262293 | NM_173375    | chr6  | 35254958 | 35255568 |
| 6  | 35235756 | 35244278 | NM_172892    | chr6  | 35243695 | 35244158 |
| 5  | 35226772 | 35236203 | NM_207277    | chr5  | 35234018 | 35234951 |
| 17 | 35135293 | 35143821 | NM_020576    | chr17 | 35140643 | 35141248 |
| 18 | 35077798 | 35086325 | NM_010481    | chr18 | 35083731 | 35084337 |
| 9  | 35011536 | 35020051 | NM_028040    | chr9  | 35012970 | 35013467 |
| 18 | 34979797 | 34989704 | NM_007913    | chr18 | 34988120 | 34988747 |
| 18 | 34960632 | 34969131 | NM_144865    | chr18 | 34966786 | 34967394 |
| 9  | 34958097 | 34966596 | NM_172291    | chr9  | 34964419 | 34965017 |
| 5  | 34951472 | 34960041 | NM_026660    | chr5  | 34957413 | 34958201 |
| 5  | 34951472 | 34960041 | NM_026660    | chr5  | 34955524 | 34956116 |



|    |          |          |              |       |          |          |
|----|----------|----------|--------------|-------|----------|----------|
| 19 | 34941337 | 34951452 | NM_023792    | chr19 | 34945416 | 34946152 |
| 13 | 34876961 | 34885460 | NM_013830    | chr13 | 34878771 | 34879413 |
| 17 | 34838648 | 34853665 | NM_019693    | chr17 | 34850775 | 34852084 |
| 6  | 34844315 | 34853668 | NM_009292    | chr6  | 34849441 | 34850058 |
| 17 | 34838648 | 34853665 | NM_019693    | chr17 | 34844677 | 34845655 |
| 17 | 34841334 | 34849928 | NM_010909    | chr17 | 34844677 | 34845655 |
| 3  | 34835604 | 34844453 | NM_011443    | chr3  | 34836555 | 34837319 |
| 7  | 34822063 | 34830562 | NM_007678    | chr7  | 34826784 | 34827779 |
| 17 | 34807458 | 34819403 | NM_013693    | chr17 | 34818349 | 34819161 |
| 5  | 34731708 | 34740207 | NM_001030306 | chr5  | 34734521 | 34735127 |
| 17 | 34618635 | 34627134 | NM_138582    | chr17 | 34619814 | 34620728 |
| 19 | 34610943 | 34619442 | NM_008332    | chr19 | 34616978 | 34617362 |
| 16 | 34604457 | 34612978 | NM_172824    | chr16 | 34610931 | 34611513 |
| 2  | 34523934 | 34532433 | BC057164     | chr2  | 34526589 | 34527247 |
| 7  | 34518790 | 34527436 | NM_175140    | chr7  | 34520184 | 34520937 |
| 17 | 34496615 | 34509054 | NM_145830    | chr17 | 34506462 | 34507045 |
| 1  | 34474194 | 34482735 | NM_007685    | chr1  | 34481200 | 34481931 |
| 7  | 34454502 | 34463001 | AB106878     | chr7  | 34461730 | 34462555 |
| 17 | 34455733 | 34464260 | NM_021337    | chr17 | 34461197 | 34462018 |
| 7  | 34454502 | 34463001 | AB106878     | chr7  | 34456468 | 34457132 |
| 17 | 34452447 | 34460994 | NM_001045864 | chr17 | 34452865 | 34453548 |
| 17 | 34409956 | 34418455 | NM_009995    | chr17 | 34418343 | 34419160 |
| 1  | 34378446 | 34393807 | NM_178601    | chr1  | 34388792 | 34389388 |
| 1  | 34381719 | 34390218 | NM_027159    | chr1  | 34388792 | 34389388 |
| 1  | 34378446 | 34393807 | NM_178601    | chr1  | 34388058 | 34388703 |
| 1  | 34381719 | 34390218 | NM_027159    | chr1  | 34388058 | 34388703 |
| 7  | 34359102 | 34370269 | NM_146188    | chr7  | 34360773 | 34361482 |
| 17 | 34349424 | 34357939 | NM_009780    | chr17 | 34352992 | 34353595 |
| 19 | 34318818 | 34327333 | NM_007392    | chr19 | 34320294 | 34321111 |
| 17 | 34272591 | 34281090 | NM_031176    | chr17 | 34273792 | 34274347 |
| 6  | 34245080 | 34253629 | NM_009658    | chr6  | 34247806 | 34248492 |
| 17 | 34221528 | 34230027 | NM_152922    | chr17 | 34222325 | 34223418 |
| 17 | 34221528 | 34230027 | NM_152922    | chr17 | 34221592 | 34222198 |
| 3  | 34205657 | 34214157 | NM_008053    | chr3  | 34210415 | 34210945 |
| 6  | 34104638 | 34113212 | NM_021435    | chr6  | 34111525 | 34112125 |
| 6  | 34104638 | 34113212 | NM_021435    | chr6  | 34106690 | 34107302 |
| 13 | 34082952 | 34091453 | NM_009450    | chr13 | 34085852 | 34086475 |
| X  | 34065674 | 34078812 | NM_001025086 | chrX  | 34073469 | 34074059 |
| 17 | 34018333 | 34026832 | NM_001001177 | chr17 | 34025738 | 34026387 |
| 13 | 34003906 | 34019577 | NM_009068    | chr13 | 34004609 | 34005234 |
| X  | 33965142 | 33979333 | NM_001040089 | chrX  | 33965475 | 33966086 |
| 10 | 33894468 | 33902967 | NM_172508    | chr10 | 33895636 | 33896737 |
| X  | 33857369 | 33865906 | NM_201236    | chrX  | 33864005 | 33864762 |
| X  | 33857369 | 33865906 | NM_201236    | chrX  | 33862059 | 33863249 |
| 10 | 33814889 | 33823398 | NM_175449    | chr10 | 33816473 | 33817276 |
| X  | 33732451 | 33740970 | NM_021300    | chrX  | 33738923 | 33739602 |
| X  | 33732451 | 33740970 | NM_021300    | chrX  | 33737177 | 33738123 |

|   |    |          |          |              |       |          |          |
|---|----|----------|----------|--------------|-------|----------|----------|
|   | 12 | 33727027 | 33735526 | NM_028139    | chr12 | 33735096 | 33735712 |
|   | 17 | 33727265 | 33738201 | NM_001025387 | chr17 | 33733858 | 33734455 |
|   | 17 | 33727265 | 33738201 | NM_001025387 | chr17 | 33727692 | 33728660 |
|   | 10 | 33706415 | 33715032 | NM_025614    | chr10 | 33709780 | 33710402 |
| X |    | 33690820 | 33699404 | NM_001039688 | chrX  | 33697297 | 33698126 |
| X |    | 33670437 | 33683863 | NM_194063    | chrX  | 33683600 | 33684466 |
| X |    | 33670437 | 33683863 | NM_194063    | chrX  | 33678164 | 33678898 |
| X |    | 33670437 | 33683863 | NM_194063    | chrX  | 33675391 | 33676386 |
|   | 17 | 33631887 | 33648012 | NM_009066    | chr17 | 33640043 | 33640685 |
|   | 17 | 33636306 | 33652390 | NM_009926    | chr17 | 33640043 | 33640685 |
|   | 17 | 33631887 | 33648012 | NM_009066    | chr17 | 33638909 | 33639577 |
|   | 17 | 33636306 | 33652390 | NM_009926    | chr17 | 33638909 | 33639577 |
|   | 17 | 33631887 | 33648012 | NM_009066    | chr17 | 33637639 | 33638332 |
|   | 17 | 33636306 | 33652390 | NM_009926    | chr17 | 33637639 | 33638332 |
|   | 16 | 33598213 | 33606712 | NM_172934    | chr16 | 33603293 | 33603938 |
|   | 18 | 33585728 | 33594243 | NM_053078    | chr18 | 33586197 | 33587385 |
|   | 4  | 33515851 | 33524350 | NM_001034867 | chr4  | 33516783 | 33517371 |
| X |    | 33514130 | 33522629 | NM_026055    | chrX  | 33514961 | 33516405 |
|   | 2  | 33460118 | 33468617 | NM_010725    | chr2  | 33467371 | 33467972 |
|   | 2  | 33460118 | 33468617 | NM_010725    | chr2  | 33465021 | 33466084 |
|   | 5  | 33415076 | 33423607 | NM_019810    | chr5  | 33421747 | 33422353 |
|   | 5  | 33415076 | 33423607 | NM_019810    | chr5  | 33415349 | 33415968 |
|   | 4  | 33354038 | 33362599 | NM_019586    | chr4  | 33359883 | 33360566 |
|   | 18 | 33336128 | 33344627 | NM_133774    | chr18 | 33343202 | 33343816 |
|   | 13 | 33194424 | 33202923 | NM_011460    | chr13 | 33200521 | 33201286 |
|   | 2  | 33190939 | 33199487 | NM_175211    | chr2  | 33193869 | 33194472 |
|   | 14 | 33181986 | 33190485 | NM_183278    | chr14 | 33184058 | 33184951 |
|   | 17 | 33156407 | 33164906 | NM_053214    | chr17 | 33162355 | 33162971 |
|   | 17 | 33156407 | 33164906 | NM_053214    | chr17 | 33157451 | 33158228 |
|   | 5  | 33142033 | 33150858 | NM_194340    | chr5  | 33147463 | 33148084 |
|   | 16 | 33098818 | 33107317 | NM_176840    | chr16 | 33104663 | 33105393 |
|   | 2  | 33044204 | 33052703 | AF125176     | chr2  | 33046986 | 33047563 |
|   | 14 | 33043139 | 33051638 | NM_181529    | chr14 | 33045841 | 33046689 |
|   | 18 | 32989941 | 33000288 | BC021497     | chr18 | 32989991 | 32990606 |
|   | 18 | 32952393 | 32966202 | NM_021367    | chr18 | 32959972 | 32960718 |
|   | 18 | 32952393 | 32966202 | NM_021367    | chr18 | 32955600 | 32956304 |
|   | 3  | 32922611 | 32931118 | NM_025316    | chr3  | 32930489 | 32931088 |
|   | 3  | 32925825 | 32934932 | NM_029017    | chr3  | 32930489 | 32931088 |
|   | 14 | 32909074 | 32917616 | NM_013473    | chr14 | 32909077 | 32909980 |
|   | 17 | 32873992 | 32882675 | NM_177719    | chr17 | 32876323 | 32877170 |
|   | 2  | 32780761 | 32789260 | NM_199302    | chr2  | 32783727 | 32784358 |
|   | 10 | 32766956 | 32775476 | AF223416     | chr10 | 32772642 | 32773680 |
|   | 2  | 32594849 | 32603642 | NM_177384    | chr2  | 32602689 | 32603329 |
|   | 16 | 32586906 | 32595405 | BC031168     | chr16 | 32593770 | 32594368 |
|   | 2  | 32532239 | 32540794 | NM_130860    | chr2  | 32540665 | 32541270 |
|   | 2  | 32537081 | 32552234 | NM_013781    | chr2  | 32540665 | 32541270 |
|   | 2  | 32386867 | 32400335 | NM_198191    | chr2  | 32387111 | 32387949 |

|    |          |          |              |       |          |          |
|----|----------|----------|--------------|-------|----------|----------|
| 9  | 32288434 | 32296933 | NM_008026    | chr9  | 32291811 | 32292423 |
| 2  | 32212267 | 32220766 | NM_133783    | chr2  | 32217402 | 32218461 |
| 11 | 32165771 | 32189466 | NM_001033981 | chr11 | 32177577 | 32178557 |
| 2  | 32172773 | 32183139 | NM_010065    | chr2  | 32174190 | 32174781 |
| 15 | 32115876 | 32124375 | NM_020503    | chr15 | 32121915 | 32122656 |
| 1  | 32111273 | 32119851 | NM_133235    | chr1  | 32111494 | 32111943 |
| 2  | 32079572 | 32088071 | NM_011675    | chr2  | 32079841 | 32080434 |
| 19 | 31928761 | 31937309 | AY566862     | chr19 | 31933795 | 31934417 |
| 16 | 31847701 | 31870885 | NM_172822    | chr16 | 31865121 | 31865889 |
| 16 | 31865729 | 31874228 | BC021536     | chr16 | 31865121 | 31865889 |
| 16 | 31847701 | 31870885 | NM_172822    | chr16 | 31864123 | 31864708 |
| 14 | 31831514 | 31840013 | BC061072     | chr14 | 31837766 | 31838428 |
| 13 | 31808111 | 31816799 | NM_008592    | chr13 | 31815592 | 31816206 |
| 13 | 31808111 | 31816799 | NM_008592    | chr13 | 31814634 | 31815235 |
| 13 | 31808111 | 31816799 | NM_008592    | chr13 | 31810819 | 31811427 |
| 13 | 31808111 | 31816799 | NM_008592    | chr13 | 31808893 | 31809486 |
| 5  | 31723042 | 31731594 | NM_172993    | chr5  | 31724429 | 31725179 |
| 14 | 31679848 | 31688347 | NM_178791    | chr14 | 31687577 | 31688207 |
| 2  | 31628758 | 31638527 | NM_183424    | chr2  | 31637825 | 31638505 |
| 2  | 31628758 | 31638527 | NM_183424    | chr2  | 31634713 | 31635745 |
| 2  | 31575993 | 31584494 | NM_009594    | chr2  | 31583216 | 31583965 |
| 3  | 31498674 | 31507173 | NM_172861    | chr3  | 31500004 | 31500843 |
| 6  | 31491482 | 31500074 | NM_013723    | chr6  | 31498348 | 31498888 |
| 17 | 31400655 | 31409199 | NM_013501    | chr17 | 31406443 | 31407373 |
| 14 | 31287288 | 31300918 | NM_009891    | chr14 | 31296389 | 31297030 |
| 3  | 31279939 | 31290644 | NM_011386    | chr3  | 31285870 | 31286488 |
| 11 | 31267394 | 31276061 | NM_011491    | chr11 | 31270479 | 31271474 |
| 16 | 31192470 | 31201024 | NM_025800    | chr16 | 31193097 | 31193697 |
| 15 | 31163014 | 31171547 | NM_146057    | chr15 | 31166264 | 31166862 |
| 5  | 31140214 | 31151765 | NM_144525    | chr5  | 31148942 | 31149575 |
| 16 | 30998628 | 31007127 | NM_198626    | chr16 | 31001259 | 31001911 |
| 2  | 30968343 | 30976856 | NM_178760    | chr2  | 30973545 | 30974183 |
| 3  | 30836157 | 30844707 | NM_027941    | chr3  | 30841025 | 30841754 |
| 2  | 30828239 | 30836738 | BC019735     | chr2  | 30831208 | 30831879 |
| 7  | 30821536 | 30830035 | NM_008281    | chr7  | 30826547 | 30827268 |
| 3  | 30784103 | 30796752 | NM_029690    | chr3  | 30793910 | 30795099 |
| 3  | 30786925 | 30796840 | NM_030557    | chr3  | 30793910 | 30795099 |
| 7  | 30757715 | 30770415 | NM_022007    | chr7  | 30757842 | 30758429 |
| 7  | 30747718 | 30756889 | NM_008761    | chr7  | 30755514 | 30756105 |
| 5  | 30735984 | 30744513 | NM_031875    | chr5  | 30741377 | 30742081 |
| 5  | 30736655 | 30745157 | NM_029285    | chr5  | 30741377 | 30742081 |
| 5  | 30735984 | 30744513 | NM_031875    | chr5  | 30737783 | 30738441 |
| 5  | 30736655 | 30745157 | NM_029285    | chr5  | 30737783 | 30738441 |
| 2  | 30722759 | 30731306 | NM_022415    | chr2  | 30729947 | 30730593 |
| 2  | 30722759 | 30731306 | NM_022415    | chr2  | 30723131 | 30723751 |
| 6  | 30677516 | 30690576 | NM_008590    | chr6  | 30686841 | 30687844 |
| 6  | 30677516 | 30690576 | NM_008590    | chr6  | 30684812 | 30685402 |

|    |          |          |              |       |          |          |
|----|----------|----------|--------------|-------|----------|----------|
| 2  | 30647764 | 30658342 | NM_133346    | chr2  | 30648355 | 30650120 |
| 6  | 30641193 | 30649692 | NM_031998    | chr6  | 30647953 | 30648559 |
| 17 | 30622879 | 30631378 | NM_021332    | chr17 | 30629030 | 30629827 |
| 7  | 30562428 | 30576230 | NM_001033316 | chr7  | 30574848 | 30575474 |
| 7  | 30526586 | 30538535 | NM_146187    | chr7  | 30528143 | 30528846 |
| 6  | 30453859 | 30464813 | NM_029373    | chr6  | 30464557 | 30465421 |
| 6  | 30456314 | 30465719 | NM_178625    | chr6  | 30464557 | 30465421 |
| 5  | 30432400 | 30440900 | BC113783     | chr5  | 30436458 | 30437069 |
| 19 | 30292939 | 30301453 | NM_010776    | chr19 | 30294064 | 30294660 |
| 7  | 30236886 | 30249772 | NM_178252    | chr7  | 30237478 | 30237993 |
| 2  | 30232059 | 30240718 | NM_138748    | chr2  | 30235890 | 30236473 |
| 2  | 30235005 | 30243757 | NM_007760    | chr2  | 30235890 | 30236473 |
| 16 | 30227109 | 30239781 | NM_008148    | chr16 | 30228266 | 30228878 |
| 7  | 30196418 | 30204931 | NM_019546    | chr7  | 30202690 | 30203273 |
| 2  | 30178741 | 30187314 | NM_139302    | chr2  | 30178924 | 30179910 |
| 12 | 30108672 | 30117265 | NM_008666    | chr12 | 30110480 | 30111166 |
| 19 | 30063787 | 30072286 | NM_025741    | chr19 | 30071110 | 30071692 |
| 14 | 30040869 | 30049383 | NM_001025379 | chr14 | 30046544 | 30047132 |
| 2  | 30017869 | 30033856 | NM_172404    | chr2  | 30027109 | 30027696 |
| 7  | 30004603 | 30032999 | NM_153577    | chr7  | 30025178 | 30025892 |
| 14 | 29995082 | 30003583 | NM_138672    | chr14 | 30000617 | 30001678 |
| 6  | 29991998 | 30000562 | NM_010938    | chr6  | 29992595 | 29993220 |
| 16 | 29979104 | 29987603 | NM_008235    | chr16 | 29982205 | 29982812 |
| 14 | 29957862 | 29966361 | NM_027289    | chr14 | 29965457 | 29966262 |
| 7  | 29934834 | 29943333 | NM_027259    | chr7  | 29942047 | 29942784 |
| 7  | 29938023 | 29950219 | NM_025548    | chr7  | 29942047 | 29942784 |
| 7  | 29934834 | 29943333 | NM_027259    | chr7  | 29940979 | 29941687 |
| 7  | 29938023 | 29950219 | NM_025548    | chr7  | 29940979 | 29941687 |
| 7  | 29934834 | 29943333 | NM_027259    | chr7  | 29936195 | 29937266 |
| 14 | 29824409 | 29833391 | NM_029626    | chr14 | 29828960 | 29829606 |
| 14 | 29827864 | 29836549 | NM_026911    | chr14 | 29828960 | 29829606 |
| 14 | 29750055 | 29758554 | NM_008407    | chr14 | 29753144 | 29753786 |
| 11 | 29723169 | 29731668 | NM_176829    | chr11 | 29723592 | 29724290 |
| 14 | 29702549 | 29718032 | NM_018746    | chr14 | 29708127 | 29708726 |
| 7  | 29658154 | 29666653 | NM_178384    | chr7  | 29661608 | 29662288 |
| 14 | 29642055 | 29657124 | NM_028839    | chr14 | 29643232 | 29643850 |
| 11 | 29601316 | 29609815 | BC032192     | chr11 | 29606343 | 29606949 |
| 7  | 29487350 | 29496049 | NM_013705    | chr7  | 29492497 | 29493188 |
| 7  | 29433257 | 29441792 | NM_029714    | chr7  | 29438874 | 29439477 |
| 7  | 29433257 | 29441792 | NM_029714    | chr7  | 29433410 | 29434010 |
| 17 | 29293901 | 29302400 | BC060066     | chr17 | 29297223 | 29297841 |
| 6  | 29159782 | 29172360 | NM_011829    | chr6  | 29164500 | 29165374 |
| 9  | 29158700 | 29167199 | BC023307     | chr9  | 29161045 | 29162158 |
| 2  | 29067550 | 29081015 | NM_133501    | chr2  | 29068081 | 29068735 |
| 19 | 29050364 | 29058996 | NM_025950    | chr19 | 29055550 | 29056242 |
| 19 | 29023917 | 29032449 | NM_028922    | chr19 | 29030663 | 29031360 |
| 19 | 29023917 | 29032449 | NM_028922    | chr19 | 29030005 | 29030643 |

|    |          |          |              |       |          |          |
|----|----------|----------|--------------|-------|----------|----------|
| 17 | 28988484 | 28996983 | NM_026845    | chr17 | 28996555 | 28997226 |
| 17 | 28989963 | 28998462 | BC004004     | chr17 | 28996555 | 28997226 |
| 17 | 28962304 | 28970809 | NM_153166    | chr17 | 28965894 | 28966567 |
| 8  | 28907606 | 28916105 | NM_026256    | chr8  | 28912575 | 28913405 |
| 7  | 28886662 | 28895291 | NM_026545    | chr7  | 28887759 | 28888538 |
| 7  | 28874908 | 28883407 | NM_182927    | chr7  | 28879833 | 28880436 |
| 8  | 28877381 | 28893366 | NM_021369    | chr8  | 28877658 | 28878258 |
| 7  | 28861573 | 28870963 | NM_028661    | chr7  | 28864565 | 28865166 |
| 17 | 28856339 | 28864838 | NM_001002786 | chr17 | 28863936 | 28864554 |
| 14 | 28835319 | 28843905 | NM_019583    | chr14 | 28843204 | 28843773 |
| 17 | 28815439 | 28828370 | NM_007669    | chr17 | 28825968 | 28826662 |
| 17 | 28815439 | 28828370 | NM_007669    | chr17 | 28822677 | 28823291 |
| 11 | 28761773 | 28770272 | NM_146015    | chr11 | 28768485 | 28769098 |
| 8  | 28691881 | 28701524 | NM_013462    | chr8  | 28693653 | 28694348 |
| 2  | 28656746 | 28665245 | NM_001033294 | chr2  | 28663008 | 28663600 |
| 2  | 28659780 | 28668302 | NM_172977    | chr2  | 28663008 | 28663600 |
| 8  | 28545777 | 28554276 | NM_054044    | chr8  | 28552384 | 28553382 |
| 17 | 28544228 | 28552727 | BC048580     | chr17 | 28545040 | 28545636 |
| 7  | 28469527 | 28478042 | NM_022432    | chr7  | 28475557 | 28476307 |
| 7  | 28469527 | 28478042 | NM_022432    | chr7  | 28470291 | 28470908 |
| 17 | 28412931 | 28421599 | NM_011951    | chr17 | 28419834 | 28420416 |
| 17 | 28415077 | 28423576 | NM_146076    | chr17 | 28419834 | 28420416 |
| 7  | 28225596 | 28234095 | NM_177396    | chr7  | 28233282 | 28233814 |
| 7  | 28216621 | 28225120 | NM_001024673 | chr7  | 28217613 | 28218404 |
| 7  | 28077646 | 28095013 | NM_138752    | chr7  | 28078649 | 28079258 |
| 7  | 28018282 | 28026806 | NM_025616    | chr7  | 28025772 | 28026472 |
| 17 | 27929367 | 27937918 | NM_027185    | chr17 | 27932716 | 27933889 |
| 17 | 27911409 | 27919908 | BC058346     | chr17 | 27912793 | 27913389 |
| 7  | 27882243 | 27890753 | NM_001037957 | chr7  | 27884128 | 27884742 |
| 5  | 27829680 | 27838227 | NM_028561    | chr5  | 27830716 | 27831302 |
| 17 | 27759667 | 27768166 | BC057331     | chr17 | 27765101 | 27765749 |
| 7  | 27635691 | 27644220 | NM_028538    | chr7  | 27636204 | 27637020 |
| 15 | 27623724 | 27632240 | NM_198301    | chr15 | 27624819 | 27625432 |
| 7  | 27563345 | 27571844 | NM_001024726 | chr7  | 27570950 | 27571548 |
| 19 | 27491698 | 27502919 | NM_177474    | chr19 | 27497222 | 27497574 |
| 2  | 27493210 | 27501758 | NM_011305    | chr2  | 27493385 | 27494353 |
| 17 | 27406843 | 27415342 | NM_178365    | chr17 | 27407324 | 27407814 |
| 7  | 27356683 | 27365183 | NM_028417    | chr7  | 27364377 | 27364979 |
| 2  | 27331191 | 27339722 | NM_080848    | chr2  | 27336974 | 27337627 |
| 16 | 27282920 | 27291472 | NM_198166    | chr16 | 27287367 | 27287960 |
| 7  | 27176596 | 27185099 | NM_133210    | chr7  | 27182757 | 27183461 |
| 7  | 27176810 | 27185379 | BC106139     | chr7  | 27182757 | 27183461 |
| 7  | 27176596 | 27185099 | NM_133210    | chr7  | 27178496 | 27179333 |
| 7  | 27176810 | 27185379 | BC106139     | chr7  | 27178496 | 27179333 |
| 8  | 27056559 | 27070350 | BC064447     | chr8  | 27068377 | 27069061 |
| 8  | 27060533 | 27069041 | NM_173012    | chr8  | 27068377 | 27069061 |
| 8  | 27056559 | 27070350 | BC064447     | chr8  | 27064764 | 27065360 |

|    |          |          |              |       |          |          |
|----|----------|----------|--------------|-------|----------|----------|
| 8  | 27060533 | 27069041 | NM_173012    | chr8  | 27064764 | 27065360 |
| 8  | 26978406 | 26986905 | BC010200     | chr8  | 26984594 | 26985208 |
| 2  | 26961984 | 26970483 | NM_175427    | chr2  | 26962473 | 26963074 |
| 9  | 26902327 | 26910839 | NM_023277    | chr9  | 26908110 | 26908714 |
| 17 | 26837573 | 26846072 | BC010323     | chr17 | 26844797 | 26845478 |
| 17 | 26837573 | 26846072 | BC010323     | chr17 | 26843001 | 26843881 |
| 13 | 26775072 | 26783584 | NM_008232    | chr13 | 26781459 | 26782058 |
| 13 | 26775072 | 26783584 | NM_008232    | chr13 | 26777008 | 26777777 |
| 2  | 26750078 | 26758577 | NM_198628    | chr2  | 26753387 | 26754235 |
| 2  | 26752881 | 26761937 | NM_011512    | chr2  | 26753387 | 26754235 |
| 2  | 26722323 | 26744539 | NM_011513    | chr2  | 26742366 | 26743191 |
| 2  | 26722323 | 26744539 | NM_011513    | chr2  | 26741056 | 26741952 |
| 2  | 26722323 | 26744539 | NM_011513    | chr2  | 26734628 | 26735209 |
| 2  | 26726816 | 26740929 | NM_013678    | chr2  | 26734628 | 26735209 |
| 2  | 26722323 | 26744539 | NM_011513    | chr2  | 26728369 | 26728985 |
| 2  | 26726816 | 26740929 | NM_013678    | chr2  | 26728369 | 26728985 |
| 17 | 26694768 | 26703305 | NM_001005916 | chr17 | 26695746 | 26696614 |
| 8  | 26564778 | 26573739 | NM_031257    | chr8  | 26564913 | 26565516 |
| 8  | 26551554 | 26560053 | AF418551     | chr8  | 26555993 | 26556709 |
| 8  | 26551554 | 26560053 | AF418551     | chr8  | 26551618 | 26552432 |
| 16 | 26491062 | 26499621 | NM_008364    | chr16 | 26496662 | 26497279 |
| 5  | 26433602 | 26442101 | NM_207657    | chr5  | 26438784 | 26439395 |
| 5  | 26367737 | 26376290 | NM_029376    | chr5  | 26368817 | 26369490 |
| 2  | 26208775 | 26217315 | NM_026563    | chr2  | 26213373 | 26213959 |
| 17 | 26165073 | 26173572 | NM_176995    | chr17 | 26169984 | 26170579 |
| 2  | 26114067 | 26122566 | NM_177841    | chr2  | 26121914 | 26122547 |
| 14 | 26058923 | 26067422 | NM_027871    | chr14 | 26059822 | 26060603 |
| 8  | 26039379 | 26047878 | NM_145949    | chr8  | 26045969 | 26046567 |
| 17 | 25924576 | 25937553 | BC019741     | chr17 | 25935562 | 25936249 |
| 17 | 25924576 | 25937553 | BC019741     | chr17 | 25925750 | 25926397 |
| 4  | 25887830 | 25896633 | NM_010243    | chr4  | 25892231 | 25892880 |
| 15 | 25879612 | 25888111 | NM_025459    | chr15 | 25881489 | 25882176 |
| 17 | 25834917 | 25853631 | NM_021793    | chr17 | 25847716 | 25848312 |
| 17 | 25710807 | 25719306 | NM_015830    | chr17 | 25717775 | 25718867 |
| 12 | 25677394 | 25691170 | NM_010496    | chr12 | 25686286 | 25686944 |
| 17 | 25586576 | 25602338 | NM_026633    | chr17 | 25591228 | 25591976 |
| 17 | 25586576 | 25602338 | NM_026633    | chr17 | 25588584 | 25589304 |
| 17 | 25586576 | 25602338 | NM_026633    | chr17 | 25587001 | 25587593 |
| 17 | 25558009 | 25585342 | NM_145999    | chr17 | 25582575 | 25583593 |
| 17 | 25558009 | 25585342 | NM_145999    | chr17 | 25580034 | 25580880 |
| 19 | 25566803 | 25575339 | NM_015826    | chr19 | 25572563 | 25573213 |
| 17 | 25558009 | 25585342 | NM_145999    | chr17 | 25568981 | 25569600 |
| 17 | 25558009 | 25585342 | NM_145999    | chr17 | 25567116 | 25567744 |
| 17 | 25538015 | 25559180 | NM_173741    | chr17 | 25545137 | 25545895 |
| 17 | 25538015 | 25559180 | NM_173741    | chr17 | 25539120 | 25539859 |
| 2  | 25516047 | 25531387 | NM_023326    | chr2  | 25528839 | 25529472 |
| 7  | 25522791 | 25531307 | NM_028775    | chr7  | 25525771 | 25526518 |

|    |          |          |              |       |          |          |
|----|----------|----------|--------------|-------|----------|----------|
| 17 | 25510434 | 25530645 | NM_133719    | chr17 | 25510965 | 25511840 |
| 17 | 25449351 | 25466964 | NM_177822    | chr17 | 25457688 | 25459181 |
| 17 | 25452503 | 25461002 | NM_145409    | chr17 | 25457688 | 25459181 |
| 17 | 25449351 | 25466964 | NM_177822    | chr17 | 25451060 | 25451682 |
| 2  | 25427956 | 25436455 | NM_001024616 | chr2  | 25429967 | 25430626 |
| 7  | 25381376 | 25389926 | NM_177102    | chr7  | 25389627 | 25390321 |
| 7  | 25383918 | 25398814 | NM_011577    | chr7  | 25389627 | 25390321 |
| 7  | 25322194 | 25338897 | NM_025504    | chr7  | 25330790 | 25331495 |
| 7  | 25322194 | 25338897 | NM_025504    | chr7  | 25329503 | 25330234 |
| 2  | 25313414 | 25329728 | NM_027062    | chr2  | 25326324 | 25326896 |
| 2  | 25313414 | 25329728 | NM_027062    | chr2  | 25321508 | 25322333 |
| 2  | 25316787 | 25325359 | NM_013908    | chr2  | 25321508 | 25322333 |
| 2  | 25280604 | 25297745 | NM_153557    | chr2  | 25290241 | 25290859 |
| 2  | 25280604 | 25297745 | NM_153557    | chr2  | 25285974 | 25286567 |
| 19 | 25244697 | 25253196 | BC029018     | chr19 | 25251576 | 25252480 |
| 2  | 25239293 | 25253182 | NM_007379    | chr2  | 25247016 | 25247622 |
| 12 | 25225612 | 25234116 | BC085296     | chr12 | 25225843 | 25226397 |
| 2  | 25211912 | 25231538 | NM_009849    | chr2  | 25222712 | 25223352 |
| 19 | 25201187 | 25209686 | BC030316     | chr19 | 25207575 | 25208163 |
| 2  | 25185136 | 25193635 | NM_001033293 | chr2  | 25185279 | 25185866 |
| 10 | 25125003 | 25133502 | NM_013511    | chr10 | 25130261 | 25130893 |
| 13 | 25025345 | 25033844 | NM_001013389 | chr13 | 25027477 | 25028078 |
| 2  | 24996767 | 25005513 | NM_025980    | chr2  | 25004465 | 25005126 |
| 2  | 24996767 | 25005513 | NM_025980    | chr2  | 25000232 | 25001071 |
| 7  | 24985570 | 24994069 | NM_027882    | chr7  | 24987549 | 24988136 |
| 17 | 24961799 | 24970975 | NM_026676    | chr17 | 24969222 | 24970129 |
| 17 | 24965225 | 24973724 | NM_172529    | chr17 | 24969222 | 24970129 |
| 19 | 24936795 | 24945333 | BC094054     | chr19 | 24942805 | 24943414 |
| 7  | 24923924 | 24934619 | NM_207677    | chr7  | 24934101 | 24935066 |
| 7  | 24924211 | 24939946 | NM_175436    | chr7  | 24934101 | 24935066 |
| 7  | 24923924 | 24934619 | NM_207677    | chr7  | 24926265 | 24927010 |
| 7  | 24924211 | 24939946 | NM_175436    | chr7  | 24926265 | 24927010 |
| 17 | 24876047 | 24884546 | BC005749     | chr17 | 24880593 | 24881601 |
| 8  | 24871063 | 24879576 | NM_013834    | chr8  | 24876009 | 24876652 |
| 13 | 24803122 | 24813247 | NM_024473    | chr13 | 24808706 | 24809682 |
| 2  | 24792071 | 24800596 | NM_146251    | chr2  | 24796940 | 24797610 |
| 2  | 24794547 | 24803107 | NM_001031808 | chr2  | 24796940 | 24797610 |
| 7  | 24780025 | 24788543 | NM_175477    | chr7  | 24787902 | 24788510 |
| 7  | 24712153 | 24720697 | NM_144921    | chr7  | 24718031 | 24718674 |
| 7  | 24712153 | 24720697 | NM_144921    | chr7  | 24714298 | 24715069 |
| 5  | 24607996 | 24616495 | NM_145401    | chr5  | 24609505 | 24610344 |
| 17 | 24600370 | 24626605 | NM_008340    | chr17 | 24609451 | 24610459 |
| 17 | 24600370 | 24626605 | NM_008340    | chr17 | 24608847 | 24609439 |
| 8  | 24598575 | 24607114 | U73972       | chr8  | 24606010 | 24606883 |
| 10 | 24581910 | 24590409 | BC005508     | chr10 | 24584773 | 24585650 |
| 17 | 24575391 | 24583902 | NM_023480    | chr17 | 24582893 | 24583567 |
| 7  | 24564962 | 24581319 | NM_027732    | chr7  | 24565490 | 24566133 |

|    |          |                       |       |          |          |
|----|----------|-----------------------|-------|----------|----------|
| 8  | 24494667 | 24503172 BC079910     | chr8  | 24499341 | 24499932 |
| 7  | 24479966 | 24488508 NM_007675    | chr7  | 24486354 | 24486958 |
| 6  | 24472154 | 24480704 NM_080847    | chr6  | 24477907 | 24478724 |
| 6  | 24475198 | 24483697 NM_026614    | chr6  | 24477907 | 24478724 |
| 6  | 24472154 | 24480704 NM_080847    | chr6  | 24477256 | 24477891 |
| 6  | 24475198 | 24483697 NM_026614    | chr6  | 24477256 | 24477891 |
| 7  | 24430551 | 24440823 NM_177593    | chr7  | 24438185 | 24438781 |
| 7  | 24412019 | 24420518 NM_199150    | chr7  | 24418016 | 24418606 |
| 17 | 24370029 | 24391806 NM_023055    | chr17 | 24373008 | 24373596 |
| 7  | 24339293 | 24347829 NM_133743    | chr7  | 24345429 | 24346128 |
| 16 | 24302839 | 24311338 NM_178665    | chr16 | 24307236 | 24308191 |
| 10 | 24278923 | 24287511 NM_010217    | chr10 | 24282837 | 24283477 |
| 10 | 24278923 | 24287511 NM_010217    | chr10 | 24279336 | 24280013 |
| 17 | 24252931 | 24267488 NM_153792    | chr17 | 24260839 | 24261456 |
| 18 | 24160831 | 24169820 NM_021559    | chr18 | 24164413 | 24165024 |
| 18 | 24126644 | 24135143 NM_011755    | chr18 | 24132355 | 24133247 |
| 1  | 24125975 | 24134496 NM_007740    | chr1  | 24127777 | 24128556 |
| 13 | 24099399 | 24107898 BC012229     | chr13 | 24106753 | 24107704 |
| 13 | 24099399 | 24107898 BC012229     | chr13 | 24105380 | 24105890 |
| 2  | 23994876 | 24011667 NM_153511    | chr2  | 24007988 | 24008622 |
| 2  | 23994876 | 24011667 NM_153511    | chr2  | 24004163 | 24004756 |
| 8  | 23994570 | 24003069 AF196476     | chr8  | 24001872 | 24002721 |
| 17 | 23976426 | 23984947 NM_007634    | chr17 | 23984097 | 23984925 |
| 2  | 23969170 | 23977695 BC119517     | chr2  | 23971111 | 23971698 |
| 17 | 23945870 | 23954369 NM_028056    | chr17 | 23950664 | 23951510 |
| 18 | 23940994 | 23949557 NM_153058    | chr18 | 23946699 | 23947313 |
| 5  | 23929384 | 23940089 NM_009207    | chr5  | 23939105 | 23939843 |
| 5  | 23931070 | 23939604 NM_007668    | chr5  | 23939105 | 23939843 |
| 5  | 23929384 | 23940089 NM_009207    | chr5  | 23930592 | 23931172 |
| 5  | 23931070 | 23939604 NM_007668    | chr5  | 23930592 | 23931172 |
| 17 | 23930616 | 23942987 NM_010947    | chr17 | 23930592 | 23931197 |
| 5  | 23917516 | 23926015 NM_183000    | chr5  | 23919166 | 23919805 |
| 17 | 23911352 | 23919851 BC080845     | chr17 | 23913234 | 23913918 |
| 17 | 23888860 | 23903038 NM_172935    | chr17 | 23893588 | 23894368 |
| 5  | 23868884 | 23877383 NM_008713    | chr5  | 23875434 | 23875963 |
| 5  | 23859170 | 23867669 NM_013569    | chr5  | 23867581 | 23868452 |
| 5  | 23859170 | 23867669 NM_013569    | chr5  | 23859446 | 23860543 |
| 9  | 23842425 | 23850924 NM_175678    | chr9  | 23849446 | 23850374 |
| 5  | 23837098 | 23845648 AF012869     | chr5  | 23841125 | 23842204 |
| 17 | 23798560 | 23807107 NM_027008    | chr17 | 23806280 | 23807080 |
| 10 | 23788829 | 23804950 NM_001010831 | chr10 | 23792760 | 23793736 |
| 13 | 23740272 | 23773659 NM_015786    | chr13 | 23753402 | 23753989 |
| 13 | 23750487 | 23759067 NM_175653    | chr13 | 23753402 | 23753989 |
| 13 | 23740272 | 23773659 NM_015786    | chr13 | 23751471 | 23752176 |
| 13 | 23750487 | 23759067 NM_175653    | chr13 | 23751471 | 23752176 |
| 1  | 23710201 | 23718808 NM_172124    | chr1  | 23716810 | 23717522 |
| 7  | 23705871 | 23714370 NM_207619    | chr7  | 23711479 | 23712169 |



|    |          |          |              |       |          |          |
|----|----------|----------|--------------|-------|----------|----------|
| 7  | 23686822 | 23695321 | NM_207546    | chr7  | 23692452 | 23693052 |
| 10 | 23683355 | 23691854 | NM_001010827 | chr10 | 23690200 | 23690748 |
| 7  | 23655174 | 23663673 | NM_206869    | chr7  | 23655520 | 23656036 |
| 8  | 23652405 | 23660904 | NM_027338    | chr8  | 23654807 | 23655699 |
| 10 | 23643910 | 23652409 | NM_001008499 | chr10 | 23648225 | 23648856 |
| 8  | 23625542 | 23637957 | NM_011848    | chr8  | 23628647 | 23629274 |
| 17 | 23589680 | 23598195 | NM_020487    | chr17 | 23595329 | 23596003 |
| 10 | 23578273 | 23586788 | NM_011704    | chr10 | 23584029 | 23584622 |
| 17 | 23554232 | 23577794 | NM_027644    | chr17 | 23561753 | 23562835 |
| 18 | 23552425 | 23561073 | NM_207650    | chr18 | 23559064 | 23559748 |
| 13 | 23548325 | 23565111 | NM_178197    | chr13 | 23557202 | 23557791 |
| 13 | 23556499 | 23564999 | NM_145713    | chr13 | 23557202 | 23557791 |
| 17 | 23554232 | 23577794 | NM_027644    | chr17 | 23556008 | 23556605 |
| 17 | 23541895 | 23550394 | BC027781     | chr17 | 23542733 | 23543913 |
| 19 | 23512920 | 23521449 | NM_174857    | chr19 | 23515747 | 23516371 |
| 8  | 23429320 | 23438640 | NM_026459    | chr8  | 23435037 | 23435731 |
| 13 | 23428812 | 23437331 | NM_013924    | chr13 | 23429030 | 23429741 |
| 17 | 23395230 | 23409509 | NM_018777    | chr17 | 23406861 | 23407502 |
| 17 | 23398893 | 23417640 | NM_001008425 | chr17 | 23406861 | 23407502 |
| 8  | 23348463 | 23356966 | NM_139219    | chr8  | 23349059 | 23349654 |
| 16 | 23338467 | 23346966 | NM_001004151 | chr16 | 23340314 | 23340933 |
| 16 | 23230413 | 23238912 | BC027833     | chr16 | 23235718 | 23236550 |
| 19 | 23195997 | 23210822 | NM_010638    | chr19 | 23209613 | 23210220 |
| 6  | 23195766 | 23204265 | BC119565     | chr6  | 23198956 | 23199742 |
| 6  | 23195766 | 23204265 | BC119565     | chr6  | 23197569 | 23198159 |
| 13 | 23189490 | 23197989 | NM_134237    | chr13 | 23191292 | 23191924 |
| 13 | 23164108 | 23172607 | NM_134238    | chr13 | 23166446 | 23167477 |
| 13 | 23137950 | 23146449 | NM_134222    | chr13 | 23142176 | 23142762 |
| 13 | 23100614 | 23109113 | NM_134245    | chr13 | 23103011 | 23103588 |
| 13 | 23035803 | 23044302 | NM_134214    | chr13 | 23039175 | 23040113 |
| 11 | 22884593 | 22893132 | NM_009837    | chr11 | 22891313 | 22891935 |
| 11 | 22757181 | 22766336 | NM_016888    | chr11 | 22761394 | 22761816 |
| 11 | 22757181 | 22766336 | NM_016888    | chr11 | 22757623 | 22758238 |
| 19 | 22502137 | 22517804 | NM_177341    | chr19 | 22509813 | 22510458 |
| 13 | 22476083 | 22484582 | NM_134221    | chr13 | 22482251 | 22482941 |
| 13 | 22442737 | 22451236 | NM_134211    | chr13 | 22449285 | 22449938 |
| 13 | 22384003 | 22392502 | NM_134213    | chr13 | 22389771 | 22390766 |
| 10 | 22328496 | 22337065 | NM_178934    | chr10 | 22332539 | 22333194 |
| 13 | 22279782 | 22288281 | NM_134223    | chr13 | 22285517 | 22286136 |
| 3  | 22261857 | 22270356 | NM_030732    | chr3  | 22268466 | 22269351 |
| 6  | 22232231 | 22240767 | NM_053116    | chr6  | 22236574 | 22237317 |
| 9  | 22116345 | 22124844 | BC030489     | chr9  | 22124239 | 22124804 |
| 13 | 22089343 | 22097842 | NM_145850    | chr13 | 22093279 | 22094172 |
| 5  | 22059643 | 22068182 | NM_011959    | chr5  | 22064300 | 22064918 |
| 5  | 22059643 | 22068182 | NM_011959    | chr5  | 22062202 | 22062918 |
| 13 | 22037352 | 22053194 | NM_175665    | chr13 | 22040777 | 22041419 |
| 13 | 22040518 | 22056414 | NM_175656    | chr13 | 22040777 | 22041419 |

|    |          |          |              |       |          |          |
|----|----------|----------|--------------|-------|----------|----------|
| 6  | 21893647 | 21902165 | NM_023626    | chr6  | 21898452 | 21899091 |
| 4  | 21861123 | 21873674 | NM_152825    | chr4  | 21866233 | 21866986 |
| 9  | 21862072 | 21873571 | NM_170777    | chr9  | 21863221 | 21864147 |
| 10 | 21842025 | 21850524 | NM_009016    | chr10 | 21841148 | 21842152 |
| 9  | 21832111 | 21841806 | NM_012029    | chr9  | 21832968 | 21833394 |
| 9  | 21799905 | 21808412 | NM_010487    | chr9  | 21805909 | 21806686 |
| 6  | 21799590 | 21808516 | NM_173007    | chr6  | 21802858 | 21803614 |
| 13 | 21785520 | 21800683 | NM_020034    | chr13 | 21794995 | 21795610 |
| 13 | 21788953 | 21797452 | NM_178202    | chr13 | 21794995 | 21795610 |
| 13 | 21785520 | 21800683 | NM_020034    | chr13 | 21787753 | 21788408 |
| 13 | 21704468 | 21712967 | NM_001011820 | chr13 | 21710622 | 21711217 |
| 9  | 21703895 | 21719978 | NM_010149    | chr9  | 21709610 | 21710465 |
| 16 | 21699280 | 21707786 | NM_023737    | chr16 | 21701648 | 21702245 |
| 10 | 21678111 | 21686620 | NM_011361    | chr10 | 21680863 | 21681460 |
| 16 | 21606098 | 21614597 | NM_001001881 | chr16 | 21609220 | 21609807 |
| 9  | 21579466 | 21587965 | BC057368     | chr9  | 21581885 | 21582482 |
| 9  | 21579466 | 21587965 | BC057368     | chr9  | 21579676 | 21580131 |
| 16 | 21378170 | 21386669 | BC023914     | chr16 | 21380180 | 21380797 |
| 10 | 21374261 | 21382760 | NM_001004162 | chr10 | 21374271 | 21374977 |
| 13 | 21364292 | 21373543 | NM_016684    | chr13 | 21369540 | 21370231 |
| 9  | 21337124 | 21345623 | NM_178619    | chr9  | 21339914 | 21340567 |
| 9  | 21337124 | 21345623 | NM_178619    | chr9  | 21338128 | 21339071 |
| 13 | 21313715 | 21322214 | NM_145451    | chr13 | 21319551 | 21320284 |
| 13 | 21297652 | 21310183 | NM_010343    | chr13 | 21302240 | 21302833 |
| 11 | 21267962 | 21277204 | NM_139297    | chr11 | 21271750 | 21272382 |
| 11 | 21267962 | 21277204 | NM_139297    | chr11 | 21268753 | 21269406 |
| 1  | 21228900 | 21237399 | BC009805     | chr1  | 21230656 | 21231275 |
| 18 | 21209354 | 21217855 | NM_008586    | chr18 | 21213612 | 21214210 |
| 9  | 21156245 | 21164744 | NM_021888    | chr9  | 21156247 | 21156943 |
| 13 | 21078265 | 21086764 | NM_146535    | chr13 | 21079989 | 21080654 |
| 5  | 21049387 | 21057935 | BC030317     | chr5  | 21055548 | 21056143 |
| 2  | 20882976 | 20891475 | BC076629     | chr2  | 20883436 | 20884029 |
| 9  | 20839891 | 20848399 | NM_027911    | chr9  | 20843733 | 20844377 |
| 9  | 20814996 | 20829933 | NM_001039824 | chr9  | 20825849 | 20826595 |
| 18 | 20695117 | 20703755 | NM_007883    | chr18 | 20695422 | 20696020 |
| 16 | 20640262 | 20654054 | NM_009379    | chr16 | 20646116 | 20646734 |
| 16 | 20640670 | 20649169 | NM_009893    | chr16 | 20646116 | 20646734 |
| 16 | 20591156 | 20599655 | BC031177     | chr16 | 20597483 | 20598215 |
| 16 | 20537394 | 20545952 | NM_139293    | chr16 | 20543404 | 20544018 |
| 16 | 20510318 | 20519076 | NM_198629    | chr16 | 20514675 | 20515732 |
| 9  | 20476117 | 20484631 | NM_173777    | chr9  | 20480598 | 20481187 |
| 9  | 20476117 | 20484631 | NM_173777    | chr9  | 20476609 | 20477257 |
| 3  | 20464303 | 20472802 | NM_029706    | chr3  | 20465595 | 20466180 |
| 11 | 20437256 | 20445922 | NM_021372    | chr11 | 20441685 | 20442372 |
| 10 | 20411766 | 20420494 | NM_013875    | chr10 | 20411788 | 20412385 |
| 18 | 20384350 | 20392849 | NM_181680    | chr18 | 20390500 | 20391123 |
| 3  | 20344589 | 20353146 | NM_013755    | chr3  | 20345609 | 20346380 |

|   |    |          |                       |       |          |          |
|---|----|----------|-----------------------|-------|----------|----------|
|   | 18 | 20142608 | 20151107 NM_007882    | chr18 | 20144752 | 20145450 |
| X |    | 20021125 | 20030484 NM_001044384 | chrX  | 20021385 | 20022019 |
|   | 11 | 19916630 | 19925129 BC030460     | chr11 | 19920776 | 19921756 |
|   | 10 | 19891886 | 19900385 BC046339     | chr10 | 19894540 | 19895258 |
|   | 13 | 19702717 | 19711225 NM_181591    | chr13 | 19707833 | 19708481 |
|   | 13 | 19624609 | 19633268 NM_134065    | chr13 | 19631640 | 19632367 |
|   | 13 | 19624648 | 19633180 NM_016687    | chr13 | 19631640 | 19632367 |
|   | 10 | 19538373 | 19546875 NM_029529    | chr10 | 19538730 | 19539373 |
| X |    | 19515562 | 19524066 NM_133669    | chrX  | 19522906 | 19523419 |
|   | 14 | 19516371 | 19529114 NM_010811    | chr14 | 19518224 | 19518818 |
|   | 14 | 19499097 | 19507596 BC049362     | chr14 | 19500702 | 19501694 |
|   | 3  | 19454609 | 19463108 NM_008802    | chr3  | 19456272 | 19456885 |
|   | 14 | 19442511 | 19451055 NM_021508    | chr14 | 19448518 | 19449226 |
|   | 13 | 19186420 | 19194919 M54990       | chr13 | 19194085 | 19194694 |
|   | 14 | 19130714 | 19139317 NM_172379    | chr14 | 19135768 | 19136378 |
|   | 14 | 19134123 | 19142636 NM_027475    | chr14 | 19135768 | 19136378 |
|   | 14 | 19077242 | 19085799 NM_026341    | chr14 | 19082796 | 19083631 |
|   | 14 | 18748893 | 18757392 BC021599     | chr14 | 18751711 | 18752594 |
|   | 7  | 18718269 | 18726920 NM_199149    | chr7  | 18723781 | 18724407 |
|   | 7  | 18689005 | 18697504 BC024868     | chr7  | 18694165 | 18695157 |
|   | 7  | 18689005 | 18697504 BC024868     | chr7  | 18693371 | 18694011 |
|   | 10 | 18528487 | 18537061 NM_022032    | chr10 | 18534207 | 18534823 |
|   | 16 | 18498033 | 18510234 NM_011532    | chr16 | 18504686 | 18505832 |
|   | 7  | 18497622 | 18506127 NM_007948    | chr7  | 18499717 | 18500312 |
|   | 16 | 18337563 | 18346075 NM_007744    | chr16 | 18343034 | 18343609 |
|   | 3  | 18240476 | 18249355 NM_021560    | chr3  | 18247187 | 18248034 |
|   | 16 | 18235507 | 18244006 NM_138583    | chr16 | 18237564 | 18238157 |
|   | 7  | 18156575 | 18165416 NM_178757    | chr7  | 18163885 | 18164583 |
|   | 16 | 18159766 | 18168276 NM_011239    | chr16 | 18163352 | 18163970 |
|   | 16 | 18134587 | 18143104 BC106166     | chr16 | 18137051 | 18137811 |
|   | 16 | 18134587 | 18143104 BC106166     | chr16 | 18135662 | 18136687 |
|   | 2  | 17912201 | 17920712 NM_026627    | chr2  | 17913666 | 17914829 |
|   | 16 | 17801766 | 17814776 NM_009435    | chr16 | 17812465 | 17813088 |
|   | 16 | 17801766 | 17814776 NM_009435    | chr16 | 17808190 | 17808917 |
|   | 16 | 17802687 | 17811234 NM_010048    | chr16 | 17808190 | 17808917 |
|   | 16 | 17749202 | 17757751 NM_030558    | chr16 | 17751632 | 17752248 |
|   | 16 | 17704845 | 17713377 NM_153790    | chr16 | 17709079 | 17709679 |
|   | 2  | 17646298 | 17654822 NM_028757    | chr2  | 17649957 | 17650555 |
|   | 16 | 17487270 | 17496234 NM_144852    | chr16 | 17487392 | 17488211 |
|   | 19 | 17421112 | 17429636 NM_173442    | chr19 | 17423122 | 17423823 |
|   | 10 | 17406662 | 17415162 NM_010828    | chr10 | 17410838 | 17411640 |
|   | 7  | 17329016 | 17337515 NM_001003393 | chr7  | 17335337 | 17335987 |
| X |    | 17296816 | 17305328 NM_028568    | chrX  | 17303131 | 17303769 |
|   | 12 | 17286075 | 17294585 NM_027959    | chr12 | 17291731 | 17292329 |
|   | 12 | 17199506 | 17208005 NM_201531    | chr12 | 17200581 | 17201284 |
|   | 16 | 17141150 | 17149650 NM_178922    | chr16 | 17146997 | 17147740 |
|   | 16 | 17112556 | 17125461 NM_009456    | chr16 | 17115099 | 17115709 |

|    |          |          |              |       |          |          |
|----|----------|----------|--------------|-------|----------|----------|
| 16 | 17112556 | 17125461 | NM_009456    | chr16 | 17113689 | 17114419 |
| 11 | 17105896 | 17114395 | NM_178909    | chr11 | 17109155 | 17109766 |
| 11 | 17109064 | 17117592 | NM_025443    | chr11 | 17109155 | 17109766 |
| 16 | 17054542 | 17063041 | NM_026940    | chr16 | 17061055 | 17061779 |
| 16 | 17055273 | 17066792 | NM_029779    | chr16 | 17061055 | 17061779 |
| 19 | 16938230 | 16946849 | NM_008023    | chr19 | 16943081 | 16943675 |
| 12 | 16830457 | 16839078 | NM_033270    | chr12 | 16836672 | 16837268 |
| 11 | 16646206 | 16654935 | NM_207655    | chr11 | 16651383 | 16652001 |
| 16 | 16471213 | 16479759 | NM_139232    | chr16 | 16474579 | 16475237 |
| 19 | 16332155 | 16340654 | NM_018858    | chr19 | 16333325 | 16333998 |
| 2  | 16268058 | 16277358 | NM_026162    | chr2  | 16275632 | 16276209 |
| 16 | 16120923 | 16129422 | NM_026163    | chr16 | 16126020 | 16126632 |
| 7  | 15995456 | 16004086 | NM_178900    | chr7  | 15998212 | 15998931 |
| 7  | 15995456 | 16004086 | NM_178900    | chr7  | 15997422 | 15998055 |
| 7  | 15995456 | 16004086 | NM_178900    | chr7  | 15996154 | 15996884 |
| 19 | 15974232 | 15982731 | BC005657     | chr19 | 15978352 | 15979081 |
| X  | 15971815 | 15980323 | NM_172778    | chrX  | 15972481 | 15973123 |
| 18 | 15540522 | 15560000 | NM_009700    | chr18 | 15548105 | 15548761 |
| 18 | 15540522 | 15560000 | NM_009700    | chr18 | 15544157 | 15544761 |
| 7  | 15440682 | 15449181 | NM_172297    | chr7  | 15440960 | 15441596 |
| 7  | 15400177 | 15408676 | NM_176912    | chr7  | 15406695 | 15407523 |
| 14 | 15365978 | 15374739 | NM_011243    | chr14 | 15371885 | 15372487 |
| 17 | 15198851 | 15210473 | NM_013684    | chr17 | 15203409 | 15204003 |
| 17 | 15200740 | 15209261 | NM_011185    | chr17 | 15203409 | 15204003 |
| 14 | 15152453 | 15161399 | NM_009409    | chr14 | 15158161 | 15158798 |
| 17 | 15077800 | 15086550 | NM_007865    | chr17 | 15080355 | 15081070 |
| 8  | 15043547 | 15052046 | NM_001007591 | chr8  | 15043730 | 15044353 |
| 2  | 14961149 | 14975615 | NM_029466    | chr2  | 14973842 | 14974664 |
| 2  | 14964535 | 14978638 | NM_028950    | chr2  | 14973842 | 14974664 |
| 8  | 14919026 | 14934832 | BC066074     | chr8  | 14928611 | 14929206 |
| 6  | 14845349 | 14854219 | NM_053242    | chr6  | 14851481 | 14852045 |
| 6  | 14845349 | 14854219 | NM_053242    | chr6  | 14848101 | 14848691 |
| 17 | 14712520 | 14721125 | U21673       | chr17 | 14720590 | 14721207 |
| 17 | 14720723 | 14729222 | NM_001034891 | chr17 | 14720590 | 14721207 |
| 16 | 14613437 | 14622008 | NM_011415    | chr16 | 14617924 | 14618692 |
| 9  | 14500016 | 14508515 | NM_010242    | chr9  | 14505114 | 14505681 |
| 10 | 14207276 | 14215775 | AF452721     | chr10 | 14207563 | 14208212 |
| 16 | 14202425 | 14210950 | NM_013607    | chr16 | 14207212 | 14207909 |
| 16 | 14202425 | 14210950 | NM_013607    | chr16 | 14202951 | 14203565 |
| 18 | 14113208 | 14121805 | NM_145492    | chr18 | 14117326 | 14118469 |
| 18 | 14113208 | 14121805 | NM_145492    | chr18 | 14113535 | 14114444 |
| 9  | 14103511 | 14112010 | BC025228     | chr9  | 14104391 | 14105206 |
| 16 | 14067204 | 14085552 | NM_023317    | chr16 | 14083782 | 14084325 |
| 16 | 14053619 | 14062118 | BC031575     | chr16 | 14058878 | 14059485 |
| 8  | 13972158 | 13980667 | NM_173744    | chr8  | 13978673 | 13979539 |
| 16 | 13894184 | 13902735 | NM_144518    | chr16 | 13899166 | 13899860 |
| 16 | 13894996 | 13904199 | NM_028968    | chr16 | 13899166 | 13899860 |

|          |    |          |          |              |             |          |          |
|----------|----|----------|----------|--------------|-------------|----------|----------|
|          | 19 | 13892914 | 13901413 | NM_001011831 | chr19       | 13895603 | 13896257 |
|          | 13 | 13849918 | 13858417 | NM_194262    | chr13       | 13856311 | 13856907 |
|          | 13 | 13852916 | 13861527 | NM_010282    | chr13       | 13856311 | 13856907 |
|          | 8  | 13835850 | 13844349 | NM_153093    | chr8        | 13842766 | 13843363 |
|          | 8  | 13835850 | 13844349 | NM_153093    | chr8        | 13837734 | 13838371 |
|          | 19 | 13694132 | 13702631 | NM_146635    | chr19       | 13700919 | 13701508 |
|          | 9  | 13566584 | 13583449 | NM_026665    | chr9        | 13583129 | 13583745 |
|          | 9  | 13581100 | 13589599 | BC036328     | chr9        | 13583129 | 13583745 |
|          | 13 | 13570665 | 13579164 | NM_010317    | chr13       | 13577215 | 13577843 |
|          | 17 | 13495435 | 13504141 | NM_022311    | chr17       | 13497633 | 13498378 |
|          | 2  | 13485805 | 13494746 | NM_011701    | chr2        | 13491931 | 13492931 |
|          | 2  | 13485805 | 13494746 | NM_011701    | chr2        | 13489382 | 13490092 |
|          | 12 | 13382553 | 13391052 | BC057020     | chr12       | 13384221 | 13385247 |
|          | 9  | 13364386 | 13372885 | BC053388     | chr9        | 13371004 | 13371584 |
| X        |    | 13362071 | 13370606 | BC100482     | chrX        | 13364131 | 13364723 |
|          | 8  | 13251630 | 13260139 | NM_172750    | chr8        | 13253926 | 13254467 |
|          | 9  | 13174534 | 13183138 | BC127147     | chr9        | 13174579 | 13175307 |
|          | 8  | 13099720 | 13108234 | NM_146207    | chr8        | 13106527 | 13107204 |
|          | 8  | 13031285 | 13039843 | NM_007972    | chr8        | 13034852 | 13035467 |
| X        |    | 13001016 | 13009515 | NM_009806    | chrX        | 13004547 | 13005152 |
|          | 18 | 13003584 | 13012549 | AB017026     | chr18       | 13003783 | 13004528 |
|          | 12 | 12963950 | 12973694 | NM_008709    | chr12       | 12964687 | 12965246 |
|          | 8  | 12909888 | 12918434 | NM_178076    | chr8        | 12910604 | 12911203 |
|          | 15 | 12821918 | 12830417 | AF440766     | chr15       | 12827109 | 12828126 |
|          | 18 | 12780952 | 12789468 | NM_028341    | chr18       | 12787398 | 12788007 |
|          | 15 | 12772615 | 12781114 | NM_026799    | chr15       | 12778658 | 12779305 |
|          | 17 | 12756499 | 12765023 | NM_026310    | chr17       | 12762661 | 12763421 |
|          | 8  | 12567026 | 12575525 | NM_024279    | chr8        | 12569046 | 12569665 |
|          | 15 | 12513572 | 12522071 | BC085315     | chr15       | 12521261 | 12522042 |
|          | 18 | 12377395 | 12385922 | NM_008720    | chr18       | 12383883 | 12384999 |
|          | 18 | 12377395 | 12385922 | NM_008720    | chr18       | 12378511 | 12379470 |
|          | 12 | 12296328 | 12304827 | NM_029758    | chr12       | 12303659 | 12304471 |
|          | 12 | 12282163 | 12290662 | BC049664     | chr12       | 12285412 | 12286277 |
|          | 18 | 12266295 | 12274885 | NM_024182    | chr18       | 12271926 | 12272652 |
|          | 17 | 12215966 | 12224524 | NM_008877    | chr17       | 12216087 | 12216706 |
|          | 17 | 12159519 | 12168106 | NM_011948    | chr17       | 12162213 | 12162974 |
| Y_random |    | 12127745 | 12137642 | BC100413     | chrY_random | 12134975 | 12136198 |
| Y_random |    | 12127745 | 12137642 | BC100413     | chrY_random | 12133164 | 12134443 |
| Y_random |    | 12127745 | 12137642 | BC100413     | chrY_random | 12132076 | 12132673 |
|          | 19 | 12124296 | 12132795 | NM_146681    | chr19       | 12125995 | 12126614 |
|          | 17 | 12069843 | 12078342 | U11548       | chr17       | 12070554 | 12071274 |
| Y_random |    | 12059277 | 12069118 | BC100414     | chrY_random | 12065008 | 12065992 |
|          | 18 | 11976810 | 11985624 | NM_022021    | chr18       | 11982297 | 11982963 |
|          | 7  | 11932398 | 11944157 | NM_145578    | chr7        | 11936368 | 11937318 |
| X        |    | 11916431 | 11925032 | NM_001048208 | chrX        | 11917015 | 11917627 |
|          | 15 | 11847900 | 11856399 | NM_008728    | chr15       | 11855843 | 11856382 |
|          | 7  | 11816497 | 11830094 | NM_029809    | chr7        | 11828085 | 11828768 |

|          |    |          |          |              |             |          |          |
|----------|----|----------|----------|--------------|-------------|----------|----------|
|          | 7  | 11816497 | 11830094 | NM_029809    | chr7        | 11826171 | 11826754 |
|          | 19 | 11705313 | 11713879 | NM_133246    | chr19       | 11712523 | 11713206 |
|          | 4  | 11679362 | 11687885 | NM_019753    | chr4        | 11685195 | 11685808 |
|          | 4  | 11625604 | 11635453 | NM_010276    | chr4        | 11628173 | 11629164 |
| Y_random |    | 11608280 | 11616797 | NM_001017393 | chrY_random | 11616162 | 11616796 |
|          | 14 | 11613813 | 11622346 | NM_012061    | chr14       | 11615062 | 11615932 |
| Y_random |    | 11608280 | 11616797 | NM_001017393 | chrY_random | 11614045 | 11614686 |
| Y_random |    | 11608280 | 11616797 | NM_001017393 | chrY_random | 11612119 | 11612819 |
|          | 11 | 11579928 | 11592868 | NM_001025597 | chr11       | 11586347 | 11586937 |
|          | 8  | 11476097 | 11484596 | NM_011227    | chr8        | 11478032 | 11479030 |
|          | 1  | 11393326 | 11401825 | NM_177173    | chr1        | 11399232 | 11400152 |
|          | 8  | 11306996 | 11315495 | NM_009932    | chr8        | 11315271 | 11316195 |
|          | 8  | 11310162 | 11318702 | NM_009931    | chr8        | 11315271 | 11316195 |
|          | 8  | 11306996 | 11315495 | NM_009932    | chr8        | 11313015 | 11314029 |
|          | 8  | 11310162 | 11318702 | NM_009931    | chr8        | 11313015 | 11314029 |
| Y_random |    | 11275195 | 11283694 | NM_001017394 | chrY_random | 11280728 | 11281690 |
| Y_random |    | 11275195 | 11283694 | NM_001017394 | chrY_random | 11279439 | 11280502 |
|          | 12 | 11174217 | 11182716 | NM_173417    | chr12       | 11175736 | 11176466 |
|          | 2  | 11162398 | 11170897 | AB062122     | chr2        | 11168387 | 11169141 |
|          | 16 | 11114344 | 11122878 | NM_025546    | chr16       | 11116778 | 11117366 |
|          | 18 | 11046506 | 11056992 | NM_010258    | chr18       | 11049688 | 11050359 |
|          | 19 | 11039211 | 11047721 | NM_023529    | chr19       | 11040763 | 11041478 |
|          | 16 | 10968523 | 10988129 | NM_009223    | chr16       | 10969841 | 10970655 |
|          | 19 | 10934277 | 10942824 | NM_133804    | chr19       | 10937992 | 10938606 |
|          | 15 | 10891057 | 10899615 | NM_030888    | chr15       | 10891857 | 10892587 |
|          | 4  | 10795715 | 10804254 | NM_026005    | chr4        | 10801668 | 10802277 |
|          | 16 | 10696004 | 10716404 | NM_009896    | chr16       | 10714859 | 10715319 |
|          | 19 | 10666670 | 10675228 | NM_015735    | chr19       | 10667159 | 10667998 |
| X        |    | 10450183 | 10484020 | BC049545     | chrX        | 10483192 | 10483765 |
| X        |    | 10450183 | 10484020 | BC049545     | chrX        | 10480206 | 10480586 |
| X        |    | 10450183 | 10484020 | BC049545     | chrX        | 10476655 | 10477419 |
| X        |    | 10450183 | 10484020 | BC049545     | chrX        | 10475849 | 10476183 |
| X        |    | 10450183 | 10484020 | BC049545     | chrX        | 10474702 | 10475686 |
| X        |    | 10450183 | 10484020 | BC049545     | chrX        | 10470524 | 10471085 |
| X        |    | 10450183 | 10484020 | BC049545     | chrX        | 10464190 | 10464751 |
| X        |    | 10450183 | 10484020 | BC049545     | chrX        | 10462919 | 10463513 |
| X        |    | 10450183 | 10484020 | BC049545     | chrX        | 10460757 | 10461582 |
| X        |    | 10450183 | 10484020 | BC049545     | chrX        | 10459224 | 10460347 |
|          | 13 | 10357550 | 10366049 | NM_033269    | chr13       | 10359938 | 10360548 |
|          | 3  | 10309043 | 10324188 | NM_001010834 | chr3        | 10309180 | 10309776 |
|          | 2  | 10282363 | 10292934 | NM_177386    | chr2        | 10287042 | 10287657 |
|          | 19 | 10260234 | 10275657 | BC024923     | chr19       | 10274530 | 10275428 |
|          | 19 | 10265646 | 10276988 | NM_007999    | chr19       | 10274530 | 10275428 |
|          | 19 | 10260234 | 10275657 | BC024923     | chr19       | 10267086 | 10268358 |
|          | 19 | 10265646 | 10276988 | NM_007999    | chr19       | 10267086 | 10268358 |
|          | 19 | 10260234 | 10275657 | BC024923     | chr19       | 10266200 | 10266840 |
|          | 19 | 10265646 | 10276988 | NM_007999    | chr19       | 10266200 | 10266840 |

|    |          |          |              |       |          |          |
|----|----------|----------|--------------|-------|----------|----------|
| 16 | 10224950 | 10233546 | NM_007929    | chr16 | 10229711 | 10230449 |
| 3  | 10186431 | 10197108 | NM_024406    | chr3  | 10189819 | 10190560 |
| 19 | 10166037 | 10174548 | NM_019699    | chr19 | 10166103 | 10166702 |
| 17 | 10159745 | 10170497 | NM_021881    | chr17 | 10160276 | 10160875 |
| 16 | 10149598 | 10158097 | BC018510     | chr16 | 10155101 | 10155753 |
| 19 | 10061760 | 10070259 | NM_011913    | chr19 | 10068612 | 10069292 |
| 19 | 10043748 | 10052311 | NM_010239    | chr19 | 10050452 | 10051897 |
| 1  | 9991835  | 10001131 | NM_145692    | chr1  | 9998860  | 9999671  |
| 8  | 9971836  | 9980375  | BC043690     | chr8  | 9975790  | 9976593  |
| 8  | 9973796  | 9983658  | NM_176953    | chr8  | 9975790  | 9976593  |
| 2  | 9963967  | 9972469  | NM_027748    | chr2  | 9966260  | 9966958  |
| 18 | 9952006  | 9960677  | NM_153552    | chr18 | 9957866  | 9958460  |
| 13 | 9761703  | 9770454  | NM_144516    | chr13 | 9765051  | 9765563  |
| 12 | 9594505  | 9607599  | NM_011859    | chr12 | 9605152  | 9605740  |
| 7  | 9502480  | 9510979  | NM_134228    | chr7  | 9505421  | 9506005  |
| 18 | 9447469  | 9456148  | NM_026484    | chr18 | 9450396  | 9451019  |
| 1  | 9281288  | 9290452  | NM_027671    | chr1  | 9286708  | 9287311  |
| 18 | 9206918  | 9215417  | NM_008058    | chr18 | 9214121  | 9215210  |
| 19 | 9050329  | 9058828  | NM_009643    | chr19 | 9056067  | 9056777  |
| 19 | 9050329  | 9058828  | NM_009643    | chr19 | 9054558  | 9055268  |
| 15 | 8992142  | 9001062  | NM_001040395 | chr15 | 8994634  | 8995245  |
| 3  | 8985018  | 8993588  | NM_001025263 | chr3  | 8991442  | 8991941  |
| 19 | 8949948  | 8967655  | NM_008060    | chr19 | 8963876  | 8964844  |
| 15 | 8909334  | 8917833  | NM_198024    | chr15 | 8915673  | 8916498  |
| 19 | 8881317  | 8889826  | DQ000354     | chr19 | 8885826  | 8886416  |
| 19 | 8883470  | 8892339  | NM_027412    | chr19 | 8885826  | 8886416  |
| 19 | 8838988  | 8847512  | NM_026325    | chr19 | 8844714  | 8845349  |
| 19 | 8832041  | 8840540  | NM_025791    | chr19 | 8832281  | 8833175  |
| 6  | 8725596  | 8734107  | NM_010492    | chr6  | 8729070  | 8729829  |
| 6  | 8725596  | 8734107  | NM_010492    | chr6  | 8727085  | 8727683  |
| 12 | 8694429  | 8703188  | NM_030723    | chr12 | 8700821  | 8701510  |
| 17 | 8682159  | 8690658  | AF110507     | chr17 | 8687154  | 8687753  |
| 3  | 8647560  | 8656112  | NM_010423    | chr3  | 8648256  | 8648851  |
| 17 | 8633919  | 8642418  | NM_011866    | chr17 | 8637266  | 8638293  |
| 12 | 8622575  | 8631074  | NM_177802    | chr12 | 8625509  | 8626368  |
| 12 | 8523494  | 8532004  | NM_007483    | chr12 | 8526242  | 8527038  |
| 6  | 8464020  | 8472519  | BC050802     | chr6  | 8465074  | 8465671  |
| 16 | 8337931  | 8346457  | NM_029070    | chr16 | 8339552  | 8340231  |
| 10 | 8206516  | 8215015  | NM_177387    | chr10 | 8206475  | 8207114  |
| 5  | 8056581  | 8065080  | BC065790     | chr5  | 8061630  | 8062267  |
| X  | 7954650  | 7963149  | NM_199319    | chrX  | 7958125  | 7959125  |
| 15 | 7916279  | 7924778  | BC083131     | chr15 | 7920101  | 7920749  |
| 12 | 7879762  | 7888261  | BC085261     | chr12 | 7886144  | 7886920  |
| 17 | 7758194  | 7766693  | NM_145968    | chr17 | 7765006  | 7765958  |
| 19 | 7673614  | 7682133  | NM_025731    | chr19 | 7680812  | 7681524  |
| 9  | 7565458  | 7573957  | NM_001030289 | chr9  | 7568910  | 7569627  |
| 9  | 7552448  | 7560962  | NM_008611    | chr9  | 7553600  | 7554240  |

|   |    |         |                      |       |         |         |
|---|----|---------|----------------------|-------|---------|---------|
|   | 10 | 7516660 | 7525159 NM_172785    | chr10 | 7523675 | 7524330 |
| X |    | 7422353 | 7430852 NM_172479    | chrX  | 7429747 | 7430366 |
|   | 3  | 7343677 | 7352242 NM_008862    | chr3  | 7350216 | 7350861 |
|   | 15 | 7342836 | 7351519 NM_178748    | chr15 | 7343986 | 7344821 |
|   | 19 | 7294698 | 7303197 BC058212     | chr19 | 7297582 | 7297925 |
|   | 9  | 7174547 | 7183046 NM_029851    | chr9  | 7175530 | 7176140 |
|   | 19 | 7169977 | 7178777 NM_201411    | chr19 | 7170939 | 7171508 |
|   | 11 | 7111410 | 7119926 NM_008343    | chr11 | 7114468 | 7115070 |
|   | 11 | 7091782 | 7100281 NM_008341    | chr11 | 7099539 | 7100136 |
| X |    | 7050357 | 7058874 NM_011591    | chrX  | 7057327 | 7057926 |
|   | 19 | 7036092 | 7044694 NM_008889    | chr19 | 7035814 | 7036412 |
|   | 19 | 6998930 | 7015201 NM_008431    | chr19 | 7000696 | 7001292 |
|   | 19 | 6970742 | 6979707 NM_026306    | chr19 | 6978367 | 6978971 |
| X |    | 6974802 | 6983301 NM_008423    | chrX  | 6975735 | 6976497 |
|   | 19 | 6970742 | 6979707 NM_026306    | chr19 | 6973639 | 6974520 |
|   | 19 | 6905146 | 6918302 NM_019924    | chr19 | 6914948 | 6915828 |
|   | 14 | 6884122 | 6892621 NM_145458    | chr14 | 6888262 | 6889011 |
|   | 6  | 6829409 | 6838082 NM_010056    | chr6  | 6830847 | 6831448 |
|   | 6  | 6829409 | 6838082 NM_010056    | chr6  | 6829596 | 6830203 |
|   | 17 | 6808308 | 6816807 NM_147155    | chr17 | 6811506 | 6812105 |
| X |    | 6728647 | 6745316 NM_054039    | chrX  | 6731407 | 6732137 |
|   | 17 | 6629891 | 6638438 NM_009510    | chr17 | 6632509 | 6633233 |
| X |    | 6577408 | 6585907 AF038507     | chrX  | 6584236 | 6584821 |
|   | 11 | 6523527 | 6532040 NM_134011    | chr11 | 6528281 | 6528877 |
|   | 11 | 6523527 | 6532040 NM_134011    | chr11 | 6526324 | 6526833 |
| X |    | 6343146 | 6351673 NM_016691    | chrX  | 6347687 | 6348348 |
|   | 19 | 6329038 | 6343749 NM_008583    | chr19 | 6337305 | 6338094 |
|   | 15 | 6327980 | 6336537 NM_023118    | chr15 | 6334388 | 6335006 |
|   | 11 | 6283367 | 6297689 NM_028601    | chr11 | 6296268 | 6296853 |
|   | 19 | 6244700 | 6253199 BC056482     | chr19 | 6251309 | 6252091 |
|   | 19 | 6244700 | 6253199 BC056482     | chr19 | 6247538 | 6248149 |
|   | 19 | 6244700 | 6253199 BC056482     | chr19 | 6246090 | 6246709 |
|   | 19 | 6233132 | 6241840 NM_198168    | chr19 | 6235200 | 6236017 |
|   | 19 | 6235668 | 6244226 NM_194348    | chr19 | 6235200 | 6236017 |
|   | 18 | 6133597 | 6142096 NM_001039692 | chr18 | 6136350 | 6137103 |
|   | 19 | 6074033 | 6088250 NM_026410    | chr19 | 6080596 | 6081190 |
|   | 19 | 6074033 | 6088250 NM_026410    | chr19 | 6077187 | 6077669 |
|   | 11 | 6070551 | 6079069 BC076563     | chr11 | 6074765 | 6075414 |
|   | 19 | 6065343 | 6073850 NM_028454    | chr19 | 6066015 | 6066632 |
|   | 2  | 6044907 | 6056844 NM_144883    | chr2  | 6056540 | 6057116 |
|   | 19 | 6011977 | 6021163 NM_007600    | chr19 | 6015502 | 6016119 |
|   | 11 | 5963054 | 5971751 NM_007595    | chr11 | 5963056 | 5964092 |
|   | 17 | 5926123 | 5934721 NM_011523    | chr17 | 5933755 | 5934408 |
|   | 19 | 5900830 | 5930816 NM_011262    | chr19 | 5925242 | 5925828 |
|   | 19 | 5900830 | 5930816 NM_011262    | chr19 | 5920055 | 5920674 |
|   | 13 | 5854735 | 5863291 NM_011803    | chr13 | 5861739 | 5862424 |
|   | 11 | 5796282 | 5804785 NM_022879    | chr11 | 5801029 | 5801755 |



|    |         |         |              |       |         |         |
|----|---------|---------|--------------|-------|---------|---------|
| 2  | 5756306 | 5765064 | NM_016918    | chr2  | 5756838 | 5757447 |
| 19 | 5683131 | 5692269 | NM_022012    | chr19 | 5690439 | 5691204 |
| 17 | 5682023 | 5690522 | BC021423     | chr17 | 5685901 | 5686421 |
| 19 | 5683131 | 5692269 | NM_022012    | chr19 | 5684178 | 5684779 |
| 19 | 5659136 | 5669651 | NM_011379    | chr19 | 5668762 | 5669361 |
| 19 | 5607186 | 5616035 | NM_178637    | chr19 | 5614877 | 5615481 |
| 1  | 5572574 | 5581137 | NM_011011    | chr1  | 5578506 | 5579175 |
| 4  | 5565326 | 5573825 | NM_173426    | chr4  | 5571664 | 5572266 |
| 19 | 5555052 | 5570573 | NM_001033448 | chr19 | 5558700 | 5559286 |
| 19 | 5558058 | 5566646 | NM_019935    | chr19 | 5558700 | 5559286 |
| 19 | 5468701 | 5477520 | NM_021474    | chr19 | 5475691 | 5476292 |
| 19 | 5465999 | 5474499 | NM_009985    | chr19 | 5467883 | 5468487 |
| 11 | 5439659 | 5448190 | NM_134033    | chr11 | 5442869 | 5443482 |
| 19 | 5422417 | 5430916 | NM_024176    | chr19 | 5429410 | 5430235 |
| 19 | 5270620 | 5279119 | NM_153129    | chr19 | 5274569 | 5275198 |
| 2  | 5212332 | 5220831 | BC025011     | chr2  | 5218062 | 5218751 |
| 6  | 5203754 | 5212253 | NM_173006    | chr6  | 5209916 | 5210531 |
| 11 | 5159062 | 5167613 | NM_032396    | chr11 | 5163570 | 5164167 |
| 19 | 5142652 | 5151151 | BC034670     | chr19 | 5144006 | 5144749 |
| 19 | 5095919 | 5112996 | NM_029576    | chr19 | 5110248 | 5111268 |
| 19 | 5095919 | 5112996 | NM_029576    | chr19 | 5109239 | 5110152 |
| 15 | 5057860 | 5066359 | NM_026069    | chr15 | 5063700 | 5064311 |
| 18 | 5040585 | 5049084 | NM_153153    | chr18 | 5046527 | 5046959 |
| 16 | 5045232 | 5053802 | NM_008909    | chr16 | 5046507 | 5047120 |
| 1  | 5007008 | 5015716 | NM_021374    | chr1  | 5008071 | 5008685 |
| 11 | 4996559 | 5005080 | NM_007968    | chr11 | 5004129 | 5004832 |
| 19 | 4987367 | 4995971 | NM_153553    | chr19 | 4991275 | 4991872 |
| 11 | 4962355 | 4971330 | NM_030228    | chr11 | 4969916 | 4970872 |
| 19 | 4940551 | 4949050 | NM_172835    | chr19 | 4942316 | 4942993 |
| 19 | 4940551 | 4949050 | NM_172835    | chr19 | 4941285 | 4941876 |
| 19 | 4872704 | 4881226 | NM_027476    | chr19 | 4879112 | 4879794 |
| 19 | 4875376 | 4883884 | NM_013456    | chr19 | 4879112 | 4879794 |
| 16 | 4848339 | 4856849 | NM_025839    | chr16 | 4852371 | 4853331 |
| 12 | 4826269 | 4834768 | NM_025323    | chr12 | 4832732 | 4833277 |
| 12 | 4749571 | 4758070 | NM_029107    | chr12 | 4752984 | 4753610 |
| 19 | 4705223 | 4713722 | NM_021287    | chr19 | 4710998 | 4711612 |
| 11 | 4644281 | 4652781 | NM_138948    | chr11 | 4651895 | 4652554 |
| 11 | 4644281 | 4652781 | NM_138948    | chr11 | 4649524 | 4650125 |
| 11 | 4644281 | 4652781 | NM_138948    | chr11 | 4644385 | 4644977 |
| 19 | 4622834 | 4631617 | NM_023131    | chr19 | 4623478 | 4624165 |
| 11 | 4616360 | 4624859 | BC031796     | chr11 | 4623386 | 4623978 |
| 7  | 4612592 | 4625962 | NM_001033383 | chr7  | 4615686 | 4616478 |
| 7  | 4613610 | 4623718 | NM_011813    | chr7  | 4615686 | 4616478 |
| 19 | 4612333 | 4621502 | NM_153388    | chr19 | 4613587 | 4614292 |
| 8  | 4607167 | 4615669 | NM_145591    | chr8  | 4613013 | 4613619 |
| 16 | 4537648 | 4546174 | NM_025571    | chr16 | 4541902 | 4542782 |
| 2  | 4538026 | 4546525 | BC046822     | chr2  | 4540575 | 4541477 |

|    |         |         |              |       |         |         |
|----|---------|---------|--------------|-------|---------|---------|
| 13 | 4520076 | 4528579 | NM_054080    | chr13 | 4524955 | 4525578 |
| 7  | 4507016 | 4531430 | NM_173008    | chr7  | 4523455 | 4524060 |
| 16 | 4503941 | 4512622 | NM_031184    | chr16 | 4511418 | 4512035 |
| 19 | 4504537 | 4513036 | BC055030     | chr19 | 4509974 | 4510930 |
| 1  | 4481035 | 4492838 | NM_011441    | chr1  | 4482011 | 4483090 |
| 12 | 4349481 | 4357984 | U64606       | chr12 | 4351726 | 4352416 |
| 16 | 4332316 | 4341034 | NM_009624    | chr16 | 4334682 | 4335333 |
| 9  | 4303833 | 4316194 | NM_026962    | chr9  | 4310164 | 4310759 |
| 9  | 4306955 | 4315469 | NM_026276    | chr9  | 4310164 | 4310759 |
| 8  | 4247080 | 4255601 | NM_133968    | chr8  | 4250433 | 4251034 |
| 12 | 4239070 | 4247926 | NM_134046    | chr12 | 4245516 | 4246105 |
| 11 | 4160587 | 4169597 | NM_001039537 | chr11 | 4165064 | 4165675 |
| 11 | 4160587 | 4169597 | NM_001039537 | chr11 | 4163162 | 4163801 |
| 19 | 4137105 | 4145609 | NM_144532    | chr19 | 4143076 | 4144062 |
| 19 | 4142663 | 4158371 | NM_011778    | chr19 | 4143076 | 4144062 |
| 11 | 4130423 | 4139335 | NM_001013365 | chr11 | 4136338 | 4136923 |
| 11 | 4112254 | 4122564 | NM_028022    | chr11 | 4117621 | 4118280 |
| 11 | 4070315 | 4078814 | BC010727     | chr11 | 4076012 | 4076699 |
| 11 | 4070315 | 4078814 | BC010727     | chr11 | 4074958 | 4075550 |
| 11 | 4054371 | 4062896 | NM_026175    | chr11 | 4060172 | 4060761 |
| 11 | 4057797 | 4066296 | NM_177616    | chr11 | 4060172 | 4060761 |
| 11 | 4045169 | 4057431 | BC046392     | chr11 | 4052791 | 4053559 |
| 11 | 4045169 | 4057431 | BC046392     | chr11 | 4051574 | 4052277 |
| 19 | 3973523 | 4005886 | NM_001001320 | chr19 | 4003199 | 4003818 |
| 19 | 3973523 | 4005886 | NM_001001320 | chr19 | 3992974 | 3993591 |
| 19 | 3973523 | 4005886 | NM_001001320 | chr19 | 3990602 | 3991583 |
| 19 | 3973523 | 4005886 | NM_001001320 | chr19 | 3979208 | 3979942 |
| 15 | 3970428 | 3979223 | NM_024188    | chr15 | 3977954 | 3978543 |
| 19 | 3973523 | 4005886 | NM_001001320 | chr19 | 3977376 | 3978071 |
| 15 | 3970428 | 3979223 | NM_024188    | chr15 | 3975081 | 3975666 |
| 11 | 3958844 | 3967343 | NM_001029937 | chr11 | 3959055 | 3959661 |
| 4  | 3944230 | 3952810 | NM_181989    | chr4  | 3945057 | 3945647 |
| 13 | 3914858 | 3923466 | NM_019671    | chr13 | 3916973 | 3917558 |
| 19 | 3902207 | 3918735 | NM_016921    | chr19 | 3902386 | 3902988 |
| 4  | 3863030 | 3871529 | NM_019969    | chr4  | 3870330 | 3871077 |
| 16 | 3779337 | 3793602 | NM_001033159 | chr16 | 3788062 | 3789046 |
| 8  | 3746431 | 3754984 | NM_133238    | chr8  | 3754045 | 3754805 |
| 5  | 3596072 | 3604571 | NM_027777    | chr5  | 3597170 | 3597877 |
| 8  | 3449739 | 3458238 | BC009156     | chr8  | 3451512 | 3452192 |
| 15 | 3418988 | 3427487 | NM_001048147 | chr15 | 3420136 | 3420726 |
| 2  | 3281342 | 3289863 | NM_145921    | chr2  | 3287849 | 3288441 |
| 19 | 3280407 | 3288906 | NM_009212    | chr19 | 3286016 | 3286963 |
| 7  | 3278094 | 3286640 | NM_181820    | chr7  | 3279855 | 3280474 |
| 11 | 3224404 | 3233310 | NM_178149    | chr11 | 3230877 | 3231656 |
| 11 | 3090915 | 3099463 | BC046305     | chr11 | 3092668 | 3093610 |
| 11 | 3018018 | 3032526 | NM_001004146 | chr11 | 3023554 | 3024401 |
| 5  | 3004565 | 3013064 | NM_134232    | chr5  | 3006656 | 3007307 |

|           |         |                      |              |         |         |
|-----------|---------|----------------------|--------------|---------|---------|
| Y_random  | 1402748 | 1411247 NM_001037748 | chrY_random  | 1408731 | 1409248 |
| Un_random | 298773  | 307326 NM_153523     | chrUn_random | 303535  | 304250  |
| Un_random | 298773  | 307326 NM_153523     | chrUn_random | 302211  | 302572  |
| 17_random | 79874   | 88373 NM_146937      | chr17_random | 82949   | 83303   |

ACCEPTED MANUSCRIPT

| gene overlap percent | region overlap percent | length(bps) | probes in region | p-value(region) |            |
|----------------------|------------------------|-------------|------------------|-----------------|------------|
| 0.071025             |                        | 1           | 616              | 17              | 0.00910118 |
| 0.100234             |                        | 1           | 857              | 24              | 0.0089158  |
| 0.0758824            |                        | 1           | 645              | 18              | 0.00895994 |
| 0.0769861            |                        | 1           | 658              | 18              | 0.00781236 |
| 0.0425085            |                        | 1           | 526              | 15              | 0.00664713 |
| 0.0712187            |                        | 1           | 606              | 14              | 0.00988683 |
| 0.07036              |                        | 1           | 602              | 16              | 0.00903056 |
| 0.108588             |                        | 1           | 923              | 21              | 0.00792712 |
| 0.0534843            |                        | 1           | 614              | 17              | 0.00838615 |
| 0.0694118            |                        | 1           | 590              | 14              | 0.00776822 |
| 0.103675             |                        | 1           | 883              | 25              | 0.00921594 |
| 0.0490115            |                        | 1           | 766              | 20              | 0.00817429 |
| 0.0792502            |                        | 1           | 723              | 21              | 0.00767995 |
| 0.0696416            |                        | 1           | 618              | 17              | 0.00822726 |
| 0.0315322            |                        | 1           | 632              | 18              | 0.00768878 |
| 0.076                |                        | 1           | 646              | 18              | 0.00813015 |
| 0.0444706            |                        | 1           | 378              | 11              | 0.00971911 |
| 0.109412             |                        | 1           | 930              | 26              | 0.00848325 |
| 0.0768235            |                        | 1           | 653              | 15              | 0.00651472 |
| 0.115882             |                        | 1           | 985              | 28              | 0.00608217 |
| 0.0491167            |                        | 1           | 645              | 19              | 0.00788298 |
| 0.0877647            |                        | 1           | 746              | 20              | 0.00559665 |
| 0.100655             |                        | 1           | 922              | 26              | 0.0044579  |
| 0.102553             |                        | 1           | 932              | 26              | 0.00911884 |
| 0.109364             |                        | 1           | 932              | 26              | 0.00911884 |
| 0.0681032            |                        | 1           | 591              | 16              | 0.00661182 |
| 0.0695294            |                        | 1           | 591              | 16              | 0.00661182 |
| 0.0699965            |                        | 1           | 597              | 17              | 0.00871277 |
| 0.0551061            | 0.501066               |             | 938              | 24              | 0.00833319 |
| 0.0704655            |                        | 1           | 601              | 17              | 0.00847443 |
| 0.088756             |                        | 1           | 757              | 21              | 0.00572907 |
| 0.127925             |                        | 1           | 1099             | 29              | 0.00763581 |
| 0.0850588            |                        | 1           | 723              | 20              | 0.00552603 |
| 0.0415441            |                        | 1           | 692              | 20              | 0.00869511 |
| 0.0565803            |                        | 1           | 500              | 14              | 0.00765347 |
| 0.0884093            |                        | 1           | 762              | 22              | 0.00684133 |
| 0.0832256            |                        | 1           | 708              | 17              | 0.00560548 |
| 0.165275             |                        | 1           | 1405             | 33              | 0.00518176 |
| 0.03529              | 0.408719               |             | 734              | 19              | 0.0079536  |
| 0.0476301            |                        | 1           | 615              | 17              | 0.00535831 |
| 0.0749412            |                        | 1           | 637              | 12              | 0.00743278 |
| 0.0768235            |                        | 1           | 653              | 16              | 0.00899525 |
| 0.0839497            |                        | 1           | 715              | 20              | 0.00783002 |
| 0.120353             |                        | 1           | 1023             | 27              | 0.0076005  |

|           |          |      |    |            |
|-----------|----------|------|----|------------|
| 0.0700725 | 1        | 609  | 15 | 0.00813015 |
| 0.0346852 | 1        | 585  | 12 | 0.00946311 |
| 0.0728064 | 1        | 619  | 18 | 0.00971028 |
| 0.0716208 | 1        | 612  | 16 | 0.00799774 |
| 0.0886728 | 1        | 757  | 20 | 0.00793595 |
| 0.10402   | 1        | 885  | 22 | 0.00847443 |
| 0.0694673 | 1        | 592  | 15 | 0.00757402 |
| 0.109286  | 1        | 945  | 27 | 0.0074063  |
| 0.0974118 | 1        | 828  | 23 | 0.00871277 |
| 0.0698217 | 1        | 599  | 17 | 0.00838615 |
| 0.128028  | 1        | 1131 | 27 | 0.00808601 |
| 0.0701176 | 1        | 596  | 12 | 0.00629403 |
| 0.0737647 | 1        | 627  | 17 | 0.00945428 |
| 0.0702353 | 1        | 597  | 17 | 0.00702671 |
| 0.0763403 | 1        | 655  | 19 | 0.00668244 |
| 0.0814118 | 1        | 692  | 19 | 0.00543776 |
| 0.0668021 | 1        | 592  | 17 | 0.00941014 |
| 0.101723  | 1        | 868  | 23 | 0.00585265 |
| 0.0812941 | 1        | 691  | 17 | 0.00688547 |
| 0.0687059 | 1        | 584  | 13 | 0.0072474  |
| 0.0711765 | 1        | 605  | 17 | 0.00837732 |
| 0.074     | 1        | 629  | 18 | 0.00859801 |
| 0.0934118 | 1        | 794  | 23 | 0.00858036 |
| 0.115799  | 1        | 988  | 20 | 0.00775057 |
| 0.0796471 | 1        | 677  | 19 | 0.0064794  |
| 0.0689412 | 1        | 586  | 14 | 0.00676189 |
| 0.104659  | 1        | 894  | 22 | 0.00843029 |
| 0.0716795 | 1        | 612  | 18 | 0.00828022 |
| 0.0719728 | 1        | 614  | 17 | 0.00926008 |
| 0.0833042 | 1        | 716  | 20 | 0.00838615 |
| 0.0652303 | 1        | 878  | 20 | 0.00925125 |
| 0.0425857 | 1        | 836  | 23 | 0.00829788 |
| 0.06211   | 1        | 836  | 23 | 0.00829788 |
| 0.0773117 | 1        | 658  | 19 | 0.0074063  |
| 0.048     | 0.690355 | 591  | 17 | 0.00775057 |
| 0.0785882 | 1        | 668  | 15 | 0.00844794 |
| 0.0712941 | 1        | 606  | 17 | 0.00879222 |
| 0.092     | 1        | 782  | 22 | 0.00555251 |
| 0.0879869 | 1        | 750  | 16 | 0.00822726 |
| 0.0646073 | 1        | 617  | 17 | 0.00784767 |
| 0.07182   | 1        | 616  | 18 | 0.00835084 |
| 0.0917108 | 1        | 780  | 22 | 0.00639996 |
| 0.0696471 | 1        | 592  | 17 | 0.00840381 |
| 0.0757647 | 1        | 644  | 18 | 0.00966614 |
| 0.0729798 | 1        | 662  | 19 | 0.00865098 |
| 0.0727952 | 1        | 662  | 19 | 0.00865098 |
| 0.0879121 | 1        | 752  | 21 | 0.00684133 |

|           |   |      |    |            |
|-----------|---|------|----|------------|
| 0.0453826 | 1 | 631  | 17 | 0.00578203 |
| 0.0552462 | 1 | 496  | 12 | 0.00821843 |
| 0.0743095 | 1 | 643  | 14 | 0.00649706 |
| 0.0521921 | 1 | 650  | 13 | 0.00719444 |
| 0.069384  | 1 | 606  | 14 | 0.00835967 |
| 0.109801  | 1 | 959  | 27 | 0.00838615 |
| 0.0709412 | 1 | 603  | 15 | 0.00981621 |
| 0.0698849 | 1 | 595  | 11 | 0.00946311 |
| 0.0704043 | 1 | 599  | 17 | 0.00474038 |
| 0.0914911 | 1 | 786  | 22 | 0.00930421 |
| 0.09      | 1 | 765  | 18 | 0.00890698 |
| 0.0544497 | 1 | 662  | 18 | 0.00816546 |
| 0.0434118 | 1 | 369  | 11 | 0.00826257 |
| 0.0685882 | 1 | 583  | 10 | 0.0099398  |
| 0.0923817 | 1 | 787  | 22 | 0.0085627  |
| 0.0693486 | 1 | 593  | 16 | 0.00735333 |
| 0.0726888 | 1 | 618  | 16 | 0.00992214 |
| 0.0852553 | 1 | 743  | 17 | 0.00781236 |
| 0.0694118 | 1 | 590  | 17 | 0.00999276 |
| 0.0698166 | 1 | 594  | 15 | 0.00595858 |
| 0.0704043 | 1 | 599  | 17 | 0.0085627  |
| 0.0691817 | 1 | 596  | 17 | 0.00890698 |
| 0.0452037 | 1 | 385  | 11 | 0.00839498 |
| 0.046798  | 1 | 399  | 11 | 0.00730919 |
| 0.0467416 | 1 | 728  | 16 | 0.00894229 |
| 0.0238844 | 1 | 372  | 11 | 0.00982504 |
| 0.0796729 | 1 | 682  | 14 | 0.00721209 |
| 0.0815294 | 1 | 693  | 20 | 0.00867746 |
| 0.0813285 | 1 | 693  | 20 | 0.00867746 |
| 0.0814118 | 1 | 692  | 12 | 0.00704437 |
| 0.0811765 | 1 | 690  | 19 | 0.00888932 |
| 0.0704706 | 1 | 599  | 12 | 0.00759167 |
| 0.0705882 | 1 | 600  | 17 | 0.00840381 |
| 0.0312526 | 1 | 754  | 20 | 0.00840381 |
| 0.0740351 | 1 | 633  | 17 | 0.00712381 |
| 0.0713033 | 1 | 610  | 14 | 0.00621458 |
| 0.0927059 | 1 | 788  | 22 | 0.005323   |
| 0.072     | 1 | 612  | 17 | 0.00636465 |
| 0.0696471 | 1 | 592  | 17 | 0.00909235 |
| 0.0406413 | 1 | 692  | 12 | 0.0052259  |
| 0.114132  | 1 | 974  | 25 | 0.00775057 |
| 0.0442446 | 1 | 605  | 16 | 0.00975442 |
| 0.045461  | 1 | 636  | 18 | 0.00759167 |
| 0.0668335 | 1 | 935  | 27 | 0.00504935 |
| 0.133983  | 1 | 1141 | 32 | 0.00749457 |
| 0.0834114 | 1 | 1425 | 30 | 0.00726506 |
| 0.0614052 | 1 | 652  | 19 | 0.00499638 |

|           |          |      |    |            |
|-----------|----------|------|----|------------|
| 0.108499  | 1        | 923  | 18 | 0.00929539 |
| 0.0687059 | 1        | 584  | 17 | 0.00703554 |
| 0.0687059 | 1        | 584  | 17 | 0.00880987 |
| 0.0453206 | 1        | 600  | 17 | 0.00946311 |
| 0.0723529 | 1        | 615  | 17 | 0.00840381 |
| 0.0688235 | 1        | 585  | 13 | 0.00918946 |
| 0.0816471 | 1        | 694  | 20 | 0.00479335 |
| 0.0687983 | 1        | 596  | 17 | 0.00451969 |
| 0.0955788 | 1        | 815  | 18 | 0.00677071 |
| 0.0861806 | 1        | 734  | 20 | 0.00873042 |
| 0.0857376 | 1        | 734  | 20 | 0.00873042 |
| 0.0536513 | 1        | 720  | 19 | 0.00659416 |
| 0.0728235 | 1        | 619  | 17 | 0.00768878 |
| 0.0991784 | 1        | 845  | 17 | 0.00704437 |
| 0.0710588 | 1        | 604  | 17 | 0.00822726 |
| 0.0681525 | 1        | 581  | 16 | 0.00512879 |
| 0.0356471 | 0.427362 | 709  | 20 | 0.00747692 |
| 0.0707059 | 1        | 601  | 17 | 0.00722092 |
| 0.076     | 1        | 646  | 18 | 0.0077594  |
| 0.018     | 0.257576 | 594  | 17 | 0.00715913 |
| 0.132588  | 1        | 1127 | 32 | 0.00634699 |
| 0.0903529 | 1        | 768  | 22 | 0.00805953 |
| 0.0891468 | 1        | 768  | 22 | 0.00805953 |
| 0.119176  | 1        | 1013 | 29 | 0.00648823 |
| 0.0895294 | 1        | 761  | 21 | 0.00762698 |
| 0.0956471 | 1        | 813  | 19 | 0.00524355 |
| 0.0905978 | 1        | 979  | 20 | 0.00682368 |
| 0.0526091 | 1        | 616  | 14 | 0.00887167 |
| 0.0793039 | 1        | 679  | 15 | 0.00513762 |
| 0.0526761 | 1        | 934  | 26 | 0.00712381 |
| 0.0675523 | 1        | 839  | 24 | 0.00648823 |
| 0.0508052 | 1        | 631  | 18 | 0.00498755 |
| 0.0600741 | 1        | 616  | 17 | 0.00895111 |
| 0.0989412 | 1        | 841  | 24 | 0.00694727 |
| 0.0697647 | 1        | 593  | 17 | 0.00772409 |
| 0.0697647 | 1        | 593  | 17 | 0.00772409 |
| 0.038423  | 1        | 613  | 18 | 0.00984269 |
| 0.0707985 | 1        | 602  | 16 | 0.00427252 |
| 0.0701795 | 1        | 602  | 16 | 0.00427252 |
| 0.0707059 | 1        | 601  | 13 | 0.00875691 |
| 0.0491765 | 1        | 418  | 12 | 0.0096838  |
| 0.0876349 | 1        | 747  | 20 | 0.00647058 |
| 0.088     | 1        | 748  | 20 | 0.00595858 |
| 0.104725  | 1        | 891  | 24 | 0.00549072 |
| 0.107619  | 1        | 1000 | 24 | 0.0080154  |
| 0.133294  | 1        | 1133 | 32 | 0.005067   |
| 0.0862353 | 1        | 733  | 20 | 0.00849208 |

|           |   |     |    |            |
|-----------|---|-----|----|------------|
| 0.07      | 1 | 595 | 17 | 0.00928656 |
| 0.0587659 | 1 | 600 | 17 | 0.0062852  |
| 0.094247  | 1 | 806 | 21 | 0.0070532  |
| 0.0653648 | 1 | 559 | 16 | 0.00873925 |
| 0.0550442 | 1 | 616 | 14 | 0.00678837 |
| 0.0711405 | 1 | 829 | 23 | 0.00408714 |
| 0.0773352 | 1 | 664 | 15 | 0.00838615 |
| 0.0708129 | 1 | 608 | 17 | 0.00937483 |
| 0.0693011 | 1 | 591 | 17 | 0.0081125  |
| 0.0902574 | 1 | 768 | 20 | 0.00500521 |
| 0.0958985 | 1 | 816 | 23 | 0.00702671 |
| 0.0731679 | 1 | 622 | 13 | 0.00735333 |
| 0.079613  | 1 | 683 | 19 | 0.005835   |
| 0.0688891 | 1 | 591 | 17 | 0.0085627  |
| 0.11295   | 1 | 969 | 22 | 0.00697375 |
| 0.0515922 | 1 | 708 | 20 | 0.00816546 |
| 0.0805882 | 1 | 685 | 19 | 0.00398121 |
| 0.0379838 | 1 | 633 | 18 | 0.00738864 |
| 0.0807713 | 1 | 754 | 15 | 0.00743278 |
| 0.0890198 | 1 | 831 | 23 | 0.00649706 |
| 0.0718824 | 1 | 611 | 13 | 0.00978973 |
| 0.0708235 | 1 | 602 | 12 | 0.00773291 |
| 0.0723529 | 1 | 615 | 17 | 0.00971028 |
| 0.076309  | 1 | 650 | 17 | 0.00726506 |
| 0.0689412 | 1 | 586 | 12 | 0.00510231 |
| 0.0801177 | 1 | 681 | 15 | 0.00821843 |
| 0.0660015 | 1 | 602 | 15 | 0.00984269 |
| 0.0678656 | 1 | 600 | 16 | 0.00735333 |
| 0.0376338 | 1 | 619 | 17 | 0.00869511 |
| 0.104542  | 1 | 893 | 25 | 0.00520824 |
| 0.0367062 | 1 | 600 | 15 | 0.00919828 |
| 0.0361556 | 1 | 591 | 10 | 0.00799774 |
| 0.0692941 | 1 | 589 | 17 | 0.00975442 |
| 0.0732941 | 1 | 623 | 12 | 0.00955139 |
| 0.0927275 | 1 | 802 | 22 | 0.00484631 |
| 0.0712358 | 1 | 607 | 17 | 0.00848325 |
| 0.0690588 | 1 | 587 | 16 | 0.00794477 |
| 0.0242721 | 1 | 386 | 11 | 0.00826257 |
| 0.0704706 | 1 | 599 | 16 | 0.00889815 |
| 0.0954284 | 1 | 812 | 20 | 0.00784767 |
| 0.0712941 | 1 | 606 | 17 | 0.00781236 |
| 0.0930459 | 1 | 859 | 24 | 0.00781236 |
| 0.0738735 | 1 | 682 | 19 | 0.00611748 |
| 0.0787015 | 1 | 674 | 19 | 0.00535831 |
| 0.0534717 | 1 | 603 | 17 | 0.00995745 |
| 0.0279477 | 1 | 594 | 12 | 0.00721209 |
| 0.0312301 | 1 | 686 | 19 | 0.00849208 |



|           |          |      |    |            |
|-----------|----------|------|----|------------|
| 0.0710588 | 1        | 604  | 17 | 0.00807719 |
| 0.0709412 | 1        | 603  | 17 | 0.00839498 |
| 0.0596444 | 1        | 748  | 17 | 0.00651472 |
| 0.083417  | 1        | 748  | 17 | 0.00651472 |
| 0.0739784 | 1        | 630  | 18 | 0.00827139 |
| 0.0737647 | 1        | 627  | 17 | 0.00837732 |
| 0.0769412 | 1        | 654  | 18 | 0.00525238 |
| 0.125294  | 1        | 1065 | 30 | 0.00585265 |
| 0.0734476 | 1        | 647  | 18 | 0.00619692 |
| 0.0752591 | 1        | 668  | 19 | 0.00838615 |
| 0.07493   | 1        | 642  | 17 | 0.00766229 |
| 0.0541181 | 1        | 617  | 12 | 0.00647058 |
| 0.0688235 | 1        | 585  | 17 | 0.0083685  |
| 0.0699415 | 1        | 598  | 16 | 0.0067972  |
| 0.0688889 | 1        | 589  | 15 | 0.00913649 |
| 0.0699543 | 1        | 627  | 18 | 0.00407832 |
| 0.0743515 | 1        | 665  | 18 | 0.00533183 |
| 0.139365  | 1        | 1186 | 33 | 0.00787415 |
| 0.0945882 | 1        | 804  | 17 | 0.00754754 |
| 0.076     | 1        | 646  | 17 | 0.0080154  |
| 0.07106   | 1        | 606  | 17 | 0.00948077 |
| 0.0634213 | 1        | 1024 | 25 | 0.00731802 |
| 0.0193396 | 1        | 721  | 20 | 0.00873042 |
| 0.027628  | 1        | 1030 | 29 | 0.00777705 |
| 0.0766518 | 1        | 652  | 19 | 0.00936601 |
| 0.0194201 | 1        | 724  | 21 | 0.00585265 |
| 0.0236313 | 1        | 881  | 25 | 0.00780354 |
| 0.0303331 | 1        | 702  | 20 | 0.00715913 |
| 0.0292529 | 1        | 677  | 19 | 0.00627637 |
| 0.0798354 | 1        | 679  | 18 | 0.00780354 |
| 0.062     | 0.888701 | 593  | 17 | 0.00762698 |
| 0.0917647 | 1        | 780  | 20 | 0.00761816 |
| 0.0540416 | 1        | 587  | 14 | 0.00955139 |
| 0.0843529 | 1        | 717  | 13 | 0.00759167 |
| 0.0741969 | 1        | 649  | 17 | 0.00614396 |
| 0.0635294 | 0.960854 | 562  | 16 | 0.00569376 |
| 0.0298025 | 1        | 664  | 19 | 0.00822726 |
| 0.0343832 | 1        | 619  | 18 | 0.00954256 |
| 0.0476445 | 1        | 803  | 23 | 0.00499638 |
| 0.069807  | 1        | 1027 | 28 | 0.00784767 |
| 0.0831227 | 1        | 1184 | 33 | 0.00745043 |
| 0.0616684 | 1        | 584  | 17 | 0.00932187 |
| 0.0619736 | 1        | 596  | 17 | 0.00737099 |
| 0.059046  | 1        | 640  | 18 | 0.00833319 |
| 0.0644444 | 1        | 609  | 17 | 0.0041048  |
| 0.084371  | 1        | 725  | 17 | 0.0075034  |
| 0.128     | 1        | 1088 | 30 | 0.00747692 |

|           |          |      |    |            |
|-----------|----------|------|----|------------|
| 0.147882  | 1        | 1257 | 35 | 0.0080154  |
| 0.0584969 | 1        | 727  | 20 | 0.00617044 |
| 0.0663553 | 1        | 611  | 17 | 0.00505817 |
| 0.0890588 | 1        | 757  | 22 | 0.00564079 |
| 0.0575965 | 1        | 613  | 15 | 0.00697375 |
| 0.0653951 | 1        | 696  | 19 | 0.00425487 |
| 0.0871248 | 1        | 743  | 21 | 0.00820077 |
| 0.0752941 | 1        | 640  | 18 | 0.00868629 |
| 0.0725882 | 1        | 617  | 17 | 0.00794477 |
| 0.0904706 | 1        | 769  | 22 | 0.00710616 |
| 0.0625706 | 1        | 941  | 27 | 0.00887167 |
| 0.0758667 | 1        | 674  | 19 | 0.00873042 |
| 0.035137  | 0.445104 | 674  | 19 | 0.00873042 |
| 0.0403708 | 1        | 614  | 17 | 0.0096838  |
| 0.0639085 | 0.930209 | 1003 | 27 | 0.00794477 |
| 0.0373313 | 1        | 545  | 12 | 0.00470507 |
| 0.0438386 | 1        | 640  | 18 | 0.00651472 |
| 0.101952  | 1        | 867  | 24 | 0.00823608 |
| 0.0625519 | 1        | 603  | 17 | 0.0088187  |
| 0.0854892 | 1        | 727  | 21 | 0.00775057 |
| 0.100941  | 1        | 858  | 24 | 0.00746809 |
| 0.0667059 | 1        | 567  | 14 | 0.00489045 |
| 0.103412  | 1        | 879  | 25 | 0.00873925 |
| 0.0722353 | 1        | 614  | 12 | 0.00765347 |
| 0.0787059 | 1        | 669  | 14 | 0.00833319 |
| 0.0532941 | 1        | 453  | 13 | 0.00971911 |
| 0.0418027 | 1        | 602  | 11 | 0.00839498 |
| 0.0445507 | 1        | 699  | 19 | 0.00585265 |
| 0.0784396 | 1        | 752  | 19 | 0.00626754 |
| 0.0541478 | 1        | 609  | 12 | 0.00572024 |
| 0.0715545 | 1        | 609  | 12 | 0.00572024 |
| 0.0355068 | 1        | 660  | 17 | 0.00758285 |
| 0.027975  | 1        | 520  | 15 | 0.00973676 |
| 0.0731566 | 1        | 629  | 18 | 0.00928656 |
| 0.0891765 | 1        | 758  | 21 | 0.00868629 |
| 0.0690588 | 0.998299 | 588  | 16 | 0.00981621 |
| 0.0911596 | 1        | 860  | 15 | 0.00731802 |
| 0.0855293 | 1        | 753  | 22 | 0.00741512 |
| 0.0614123 | 1        | 674  | 19 | 0.00798891 |
| 0.0493591 | 1        | 439  | 12 | 0.00648823 |
| 0.0393831 | 1        | 595  | 17 | 0.0091718  |
| 0.0727059 | 1        | 618  | 17 | 0.00977207 |
| 0.0719181 | 1        | 892  | 22 | 0.00594093 |
| 0.072474  | 1        | 619  | 14 | 0.00858918 |
| 0.0830588 | 1        | 706  | 20 | 0.00661182 |
| 0.101981  | 1        | 875  | 24 | 0.00794477 |
| 0.0889463 | 1        | 758  | 22 | 0.00826257 |

|           |   |      |    |            |
|-----------|---|------|----|------------|
| 0.0702976 | 1 | 626  | 16 | 0.00794477 |
| 0.114563  | 1 | 981  | 21 | 0.00518176 |
| 0.0865882 | 1 | 736  | 17 | 0.00919828 |
| 0.0765882 | 1 | 651  | 17 | 0.00834201 |
| 0.0798824 | 1 | 679  | 19 | 0.00737099 |
| 0.0567988 | 1 | 632  | 18 | 0.00682368 |
| 0.0737198 | 1 | 632  | 18 | 0.00682368 |
| 0.0561697 | 1 | 625  | 18 | 0.00786533 |
| 0.0729033 | 1 | 625  | 18 | 0.00786533 |
| 0.113254  | 1 | 963  | 27 | 0.00918946 |
| 0.0662353 | 1 | 563  | 14 | 0.00732685 |
| 0.0875429 | 1 | 766  | 21 | 0.00660299 |
| 0.0948195 | 1 | 809  | 22 | 0.00707085 |
| 0.0709245 | 1 | 603  | 17 | 0.00826257 |
| 0.0825688 | 1 | 702  | 20 | 0.00722092 |
| 0.0721176 | 1 | 613  | 17 | 0.00764464 |
| 0.05354   | 1 | 456  | 10 | 0.00745043 |
| 0.101059  | 1 | 859  | 20 | 0.00519059 |
| 0.0837635 | 1 | 714  | 17 | 0.00745926 |
| 0.0825613 | 1 | 704  | 20 | 0.00731802 |
| 0.0721843 | 1 | 614  | 16 | 0.00780354 |
| 0.0548102 | 1 | 670  | 12 | 0.00956021 |
| 0.0835294 | 1 | 710  | 20 | 0.00468742 |
| 0.0729324 | 1 | 627  | 18 | 0.00659416 |
| 0.0723274 | 1 | 615  | 17 | 0.00890698 |
| 0.105246  | 1 | 941  | 25 | 0.00879222 |
| 0.0424897 | 1 | 555  | 16 | 0.00741512 |
| 0.0461644 | 1 | 603  | 17 | 0.00823608 |
| 0.0517532 | 1 | 676  | 19 | 0.00813015 |
| 0.0693821 | 1 | 603  | 17 | 0.00662947 |
| 0.0709195 | 1 | 607  | 17 | 0.00847443 |
| 0.107319  | 1 | 915  | 26 | 0.00590562 |
| 0.0609884 | 1 | 522  | 15 | 0.00768878 |
| 0.0782353 | 1 | 665  | 18 | 0.00850091 |
| 0.0781598 | 1 | 666  | 19 | 0.00574672 |
| 0.0736597 | 1 | 632  | 18 | 0.00549955 |
| 0.0855132 | 1 | 729  | 20 | 0.00838615 |
| 0.0447589 | 1 | 620  | 17 | 0.00658534 |
| 0.0377763 | 1 | 617  | 14 | 0.00823608 |
| 0.0761112 | 1 | 649  | 19 | 0.00777705 |
| 0.044841  | 1 | 671  | 19 | 0.00807719 |
| 0.136471  | 1 | 1160 | 29 | 0.0064441  |
| 0.0633052 | 1 | 742  | 18 | 0.00833319 |
| 0.0872941 | 1 | 742  | 18 | 0.00833319 |
| 0.0289093 | 1 | 489  | 14 | 0.00979856 |
| 0.0302176 | 1 | 418  | 12 | 0.00640879 |
| 0.0775294 | 1 | 659  | 18 | 0.00798891 |

|           |          |     |    |            |
|-----------|----------|-----|----|------------|
| 0.0488206 | 1        | 445 | 11 | 0.00735333 |
| 0.0702353 | 1        | 597 | 17 | 0.00989566 |
| 0.0627584 | 1        | 592 | 17 | 0.00971028 |
| 0.0754118 | 1        | 641 | 18 | 0.00480217 |
| 0.0689412 | 1        | 586 | 16 | 0.00882753 |
| 0.0414793 | 1        | 692 | 19 | 0.00805071 |
| 0.0397263 | 1        | 598 | 14 | 0.00993097 |
| 0.0527896 | 1        | 809 | 23 | 0.00456383 |
| 0.059308  | 1        | 929 | 26 | 0.00559665 |
| 0.0725882 | 1        | 617 | 16 | 0.00810367 |
| 0.0384959 | 1        | 603 | 17 | 0.00863332 |
| 0.078542  | 1        | 668 | 18 | 0.00868629 |
| 0.0717546 | 1        | 613 | 13 | 0.0057732  |
| 0.0421348 | 1        | 585 | 17 | 0.0085627  |
| 0.0732132 | 1        | 841 | 18 | 0.00621458 |
| 0.0515365 | 1        | 592 | 17 | 0.00838615 |
| 0.071722  | 1        | 611 | 16 | 0.00803305 |
| 0.0865882 | 1        | 736 | 21 | 0.00658534 |
| 0.113059  | 1        | 961 | 22 | 0.00762698 |
| 0.0797647 | 1        | 678 | 18 | 0.00840381 |
| 0.0473317 | 1        | 651 | 17 | 0.00669127 |
| 0.0684186 | 1        | 591 | 17 | 0.00841263 |
| 0.0875294 | 1        | 744 | 21 | 0.00745043 |
| 0.0690588 | 1        | 587 | 17 | 0.00998393 |
| 0.0842353 | 1        | 716 | 14 | 0.00842146 |
| 0.0885882 | 1        | 753 | 20 | 0.0077594  |
| 0.0237564 | 1        | 383 | 11 | 0.00921594 |
| 0.0876471 | 1        | 745 | 21 | 0.00867746 |
| 0.068921  | 1        | 587 | 17 | 0.00805953 |
| 0.0544666 | 1        | 728 | 20 | 0.00472273 |
| 0.0430316 | 1        | 599 | 17 | 0.00956904 |
| 0.0487069 | 1        | 678 | 19 | 0.00747692 |
| 0.038448  | 1        | 654 | 18 | 0.00799774 |
| 0.0714754 | 1        | 654 | 18 | 0.00799774 |
| 0.0483245 | 1        | 822 | 23 | 0.00767112 |
| 0.0898361 | 1        | 822 | 23 | 0.00767112 |
| 0.0870664 | 1        | 758 | 20 | 0.0057732  |
| 0.0587059 | 0.650587 | 767 | 21 | 0.00565844 |
| 0.0477117 | 1        | 564 | 16 | 0.00590562 |
| 0.0705937 | 1        | 604 | 12 | 0.00972794 |
| 0.0764042 | 1        | 657 | 15 | 0.00592327 |
| 0.0799327 | 1        | 713 | 20 | 0.00682368 |
| 0.0729412 | 1        | 620 | 18 | 0.00687664 |
| 0.0861176 | 1        | 732 | 17 | 0.00736216 |
| 0.092     | 1        | 782 | 22 | 0.00633817 |
| 0.0832941 | 1        | 708 | 18 | 0.00918946 |
| 0.0698824 | 1        | 594 | 16 | 0.00625872 |

|           |   |      |    |            |
|-----------|---|------|----|------------|
| 0.0682427 | 1 | 586  | 17 | 0.00486397 |
| 0.0982412 | 1 | 849  | 24 | 0.00876573 |
| 0.0729412 | 1 | 620  | 17 | 0.00678837 |
| 0.08      | 1 | 680  | 19 | 0.00468742 |
| 0.0320679 | 1 | 631  | 15 | 0.00726506 |
| 0.0553207 | 1 | 589  | 15 | 0.00973676 |
| 0.0718473 | 1 | 625  | 17 | 0.00534065 |
| 0.0936435 | 1 | 797  | 20 | 0.00777705 |
| 0.0240913 | 1 | 625  | 18 | 0.00729154 |
| 0.0897647 | 1 | 763  | 21 | 0.00790946 |
| 0.093116  | 1 | 794  | 22 | 0.00746809 |
| 0.0524839 | 1 | 449  | 13 | 0.0077594  |
| 0.0723529 | 1 | 615  | 17 | 0.00926008 |
| 0.0929412 | 1 | 790  | 22 | 0.00700906 |
| 0.0731765 | 1 | 622  | 11 | 0.00627637 |
| 0.0956471 | 1 | 813  | 23 | 0.00814781 |
| 0.0825882 | 1 | 702  | 20 | 0.00844794 |
| 0.06965   | 1 | 593  | 17 | 0.00885401 |
| 0.0708235 | 1 | 602  | 15 | 0.00931304 |
| 0.144941  | 1 | 1232 | 30 | 0.00730919 |
| 0.0721878 | 1 | 618  | 17 | 0.00904822 |
| 0.0154585 | 1 | 351  | 10 | 0.00745043 |
| 0.0617176 | 1 | 636  | 15 | 0.00865098 |
| 0.128332  | 1 | 1093 | 30 | 0.00903056 |
| 0.056135  | 1 | 479  | 12 | 0.00971028 |
| 0.0709078 | 1 | 603  | 17 | 0.00844794 |
| 0.102235  | 1 | 869  | 25 | 0.00804188 |
| 0.0715626 | 1 | 610  | 17 | 0.00539362 |
| 0.068424  | 1 | 610  | 17 | 0.00539362 |
| 0.0768419 | 1 | 655  | 19 | 0.00719444 |
| 0.0679739 | 1 | 884  | 25 | 0.00863332 |
| 0.0900141 | 1 | 768  | 19 | 0.00617044 |
| 0.070482  | 1 | 601  | 16 | 0.00951608 |
| 0.070573  | 1 | 601  | 16 | 0.00951608 |
| 0.131817  | 1 | 1124 | 31 | 0.00828905 |
| 0.0697647 | 1 | 593  | 17 | 0.00627637 |
| 0.078592  | 1 | 681  | 19 | 0.00706202 |
| 0.0800988 | 1 | 681  | 19 | 0.00706202 |
| 0.0692441 | 1 | 600  | 17 | 0.00763581 |
| 0.0705716 | 1 | 600  | 17 | 0.00763581 |
| 0.0742353 | 1 | 631  | 18 | 0.00545541 |
| 0.0757398 | 1 | 773  | 16 | 0.00759167 |
| 0.08      | 1 | 680  | 17 | 0.00858918 |
| 0.0829412 | 1 | 705  | 20 | 0.00821843 |
| 0.0838824 | 1 | 713  | 18 | 0.00741512 |
| 0.0824512 | 1 | 701  | 20 | 0.0077594  |
| 0.068666  | 1 | 593  | 17 | 0.00849208 |

|           |          |      |    |            |
|-----------|----------|------|----|------------|
| 0.0867059 | 1        | 737  | 18 | 0.00721209 |
| 0.0618824 | 1        | 526  | 11 | 0.00973676 |
| 0.0717967 | 1        | 613  | 12 | 0.00821843 |
| 0.0712941 | 1        | 606  | 16 | 0.00922477 |
| 0.0895294 | 1        | 761  | 14 | 0.00655003 |
| 0.0767059 | 1        | 652  | 14 | 0.00521707 |
| 0.076157  | 1        | 650  | 17 | 0.00879222 |
| 0.0687769 | 1        | 591  | 16 | 0.00941014 |
| 0.0544138 | 1        | 601  | 17 | 0.00975442 |
| 0.0705882 | 1        | 600  | 16 | 0.00972794 |
| 0.0648935 | 1        | 871  | 24 | 0.00912766 |
| 0.0708235 | 1        | 602  | 17 | 0.00826257 |
| 0.069172  | 1        | 589  | 10 | 0.00979856 |
| 0.0832946 | 1        | 716  | 20 | 0.00505817 |
| 0.0842353 | 1        | 716  | 20 | 0.00505817 |
| 0.0743529 | 1        | 632  | 18 | 0.00659416 |
| 0.0381577 | 1        | 850  | 24 | 0.00802422 |
| 0.0487805 | 1        | 612  | 16 | 0.00977207 |
| 0.0481428 | 1        | 604  | 17 | 0.00972794 |
| 0.0716121 | 1        | 613  | 18 | 0.00558783 |
| 0.117097  | 1        | 1089 | 26 | 0.00761816 |
| 0.0679725 | 1        | 583  | 17 | 0.00964849 |
| 0.0404332 | 1        | 687  | 17 | 0.00837732 |
| 0.0668943 | 1        | 666  | 19 | 0.00873042 |
| 0.0295617 | 1        | 661  | 18 | 0.00798891 |
| 0.0534118 | 1        | 454  | 13 | 0.00946311 |
| 0.0222667 | 1        | 824  | 23 | 0.00772409 |
| 0.0200508 | 1        | 742  | 21 | 0.00818312 |
| 0.0704126 | 1        | 599  | 17 | 0.00848325 |
| 0.0685794 | 1        | 588  | 16 | 0.00813898 |
| 0.0482279 | 1        | 596  | 17 | 0.00883636 |
| 0.086     | 1        | 731  | 21 | 0.00876573 |
| 0.0887059 | 1        | 754  | 21 | 0.00589679 |
| 0.0719812 | 1        | 642  | 13 | 0.00890698 |
| 0.074318  | 1        | 632  | 18 | 0.00963966 |
| 0.0827313 | 1        | 710  | 21 | 0.00466094 |
| 0.0695193 | 1        | 593  | 14 | 0.0080154  |
| 0.065007  | 1        | 974  | 27 | 0.00479335 |
| 0.0827426 | 1        | 712  | 20 | 0.00825374 |
| 0.084014  | 1        | 720  | 21 | 0.00466094 |
| 0.0720009 | 1        | 620  | 15 | 0.00752105 |
| 0.0414118 | 0.402286 | 875  | 25 | 0.00722092 |
| 0.0452791 | 1        | 950  | 27 | 0.00790946 |
| 0.0740697 | 1        | 631  | 15 | 0.00752105 |
| 0.1       | 1        | 850  | 22 | 0.00850974 |
| 0.0804135 | 1        | 739  | 21 | 0.00732685 |
| 0.0266028 | 1        | 600  | 17 | 0.00833319 |

|           |          |      |    |            |
|-----------|----------|------|----|------------|
| 0.0296178 | 1        | 668  | 19 | 0.00559665 |
| 0.0743063 | 1        | 640  | 13 | 0.00503169 |
| 0.045977  | 1        | 396  | 11 | 0.00569376 |
| 0.036767  | 1        | 590  | 17 | 0.00966614 |
| 0.0926142 | 1        | 795  | 23 | 0.00640879 |
| 0.0723529 | 1        | 615  | 18 | 0.00884518 |
| 0.0593197 | 1        | 879  | 25 | 0.00855387 |
| 0.0841176 | 1        | 715  | 20 | 0.00483749 |
| 0.0722353 | 1        | 614  | 14 | 0.00853622 |
| 0.0692941 | 1        | 589  | 11 | 0.00540245 |
| 0.0597647 | 1        | 508  | 15 | 0.00966614 |
| 0.098     | 1        | 833  | 22 | 0.00839498 |
| 0.0733169 | 1        | 624  | 18 | 0.00624106 |
| 0.0772578 | 1        | 657  | 16 | 0.00992214 |
| 0.0941668 | 1        | 812  | 20 | 0.00793595 |
| 0.0704706 | 1        | 599  | 17 | 0.00901291 |
| 0.0865882 | 1        | 736  | 17 | 0.00736216 |
| 0.0321915 | 1        | 608  | 14 | 0.00772409 |
| 0.0644786 | 1        | 609  | 17 | 0.00709733 |
| 0.0415303 | 1        | 609  | 13 | 0.0097809  |
| 0.0691765 | 1        | 588  | 11 | 0.00722092 |
| 0.0725125 | 1        | 626  | 18 | 0.00822726 |
| 0.0664176 | 1        | 569  | 16 | 0.0074063  |
| 0.0709412 | 1        | 603  | 17 | 0.00978973 |
| 0.0704706 | 1        | 599  | 16 | 0.00984269 |
| 0.0691147 | 1        | 591  | 16 | 0.00726506 |
| 0.0801177 | 1        | 681  | 16 | 0.00926008 |
| 0.0806376 | 1        | 688  | 16 | 0.00745043 |
| 0.0764706 | 1        | 650  | 15 | 0.00873925 |
| 0.0811765 | 1        | 690  | 19 | 0.00821843 |
| 0.0761176 | 1        | 647  | 12 | 0.0083685  |
| 0.0360964 | 0.412081 | 745  | 21 | 0.00684133 |
| 0.0861969 | 1        | 745  | 21 | 0.00684133 |
| 0.0418139 | 1        | 639  | 18 | 0.00684133 |
| 0.0701033 | 1        | 597  | 13 | 0.00613513 |
| 0.0258226 | 1        | 638  | 18 | 0.00805071 |
| 0.0957936 | 1        | 1084 | 30 | 0.00770643 |
| 0.0788682 | 1        | 708  | 20 | 0.00545541 |
| 0.0573688 | 1        | 515  | 11 | 0.00919828 |
| 0.0578015 | 1        | 855  | 20 | 0.00743278 |
| 0.0727911 | 1        | 622  | 18 | 0.00868629 |
| 0.0831765 | 1        | 707  | 20 | 0.0080154  |
| 0.0826804 | 1        | 707  | 20 | 0.0080154  |
| 0.0737647 | 1        | 627  | 18 | 0.00873042 |
| 0.0675336 | 1        | 592  | 13 | 0.00566727 |
| 0.0820104 | 1        | 1090 | 30 | 0.00868629 |
| 0.0601778 | 1        | 528  | 15 | 0.00794477 |

|            |           |      |    |            |
|------------|-----------|------|----|------------|
| 0.0825165  | 1         | 724  | 19 | 0.00503169 |
| 0.0743307  | 1         | 633  | 18 | 0.00896877 |
| 0.0373148  | 1         | 617  | 18 | 0.00940132 |
| 0.038101   | 1         | 630  | 18 | 0.00586148 |
| 0.0628173  | 1         | 594  | 17 | 0.00865098 |
| 0.0791325  | 1         | 675  | 17 | 0.00799774 |
| 0.0964974  | 1         | 821  | 22 | 0.00749457 |
| 0.0713446  | 1         | 607  | 17 | 0.0073445  |
| 0.070112   | 1         | 601  | 17 | 0.00926008 |
| 0.0710939  | 1         | 607  | 17 | 0.00662065 |
| 0.107806   | 1         | 917  | 25 | 0.00842146 |
| 0.059679   | 1         | 673  | 19 | 0.00707085 |
| 0.0761097  | 1         | 655  | 18 | 0.00814781 |
| 0.0922353  | 1         | 784  | 22 | 0.00646175 |
| 0.135534   | 1         | 1158 | 32 | 0.00890698 |
| 0.0705718  | 1         | 606  | 17 | 0.00873925 |
| 0.0903699  | 1         | 777  | 20 | 0.00547307 |
| 0.0704815  | 1         | 606  | 16 | 0.00805071 |
| 0.0504816  | 1         | 760  | 17 | 0.00619692 |
| 0.0729047  | 1         | 635  | 18 | 0.00931304 |
| 0.0870728  | 1         | 749  | 21 | 0.00730919 |
| 0.0695294  | 1         | 591  | 17 | 0.00822726 |
| 0.0712941  | 1         | 606  | 17 | 0.0078565  |
| 0.0721176  | 1         | 613  | 10 | 0.00483749 |
| 0.074      | 1         | 629  | 18 | 0.00544658 |
| 0.102941   | 1         | 875  | 24 | 0.00741512 |
| 0.0689412  | 1         | 586  | 17 | 0.00889815 |
| 0.0915294  | 1         | 778  | 18 | 0.00480217 |
| 0.0707059  | 1         | 601  | 17 | 0.00966614 |
| 0.0703665  | 1         | 601  | 17 | 0.0086245  |
| 0.0803529  | 1         | 683  | 20 | 0.00557017 |
| 0.0690588  | 1         | 587  | 17 | 0.0085627  |
| 0.0743529  | 1         | 632  | 14 | 0.00661182 |
| 0.00591327 | 0.0957447 | 564  | 14 | 0.00789181 |
| 0.0634278  | 1         | 564  | 14 | 0.00789181 |
| 0.0922986  | 1         | 785  | 22 | 0.00771526 |
| 0.0554576  | 0.711916  | 663  | 18 | 0.00585265 |
| 0.0709078  | 1         | 603  | 17 | 0.00568493 |
| 0.102588   | 1         | 872  | 24 | 0.00781236 |
| 0.0841045  | 1         | 718  | 20 | 0.00682368 |
| 0.106588   | 1         | 906  | 21 | 0.00871277 |
| 0.121412   | 1         | 1032 | 24 | 0.00492576 |
| 0.0688683  | 1         | 586  | 13 | 0.00863332 |
| 0.0782246  | 1         | 675  | 12 | 0.00547307 |
| 0.0704706  | 1         | 599  | 17 | 0.00840381 |
| 0.0784706  | 1         | 667  | 19 | 0.00833319 |
| 0.106235   | 1         | 903  | 23 | 0.00594975 |



|           |          |      |    |            |
|-----------|----------|------|----|------------|
| 0.116     | 1        | 986  | 27 | 0.00565844 |
| 0.0710588 | 1        | 604  | 10 | 0.00842146 |
| 0.0698629 | 1        | 596  | 17 | 0.00681485 |
| 0.055809  | 1        | 893  | 26 | 0.00798891 |
| 0.0430598 | 1        | 689  | 19 | 0.00910118 |
| 0.0785328 | 1        | 668  | 19 | 0.00808601 |
| 0.117343  | 1        | 998  | 24 | 0.009622   |
| 0.070245  | 1        | 602  | 16 | 0.00880104 |
| 0.0707985 | 1        | 602  | 16 | 0.00880104 |
| 0.0809579 | 1        | 693  | 19 | 0.00813015 |
| 0.123493  | 1        | 1055 | 20 | 0.00719444 |
| 0.0698818 | 1        | 597  | 16 | 0.00936601 |
| 0.0739151 | 1        | 637  | 17 | 0.00848325 |
| 0.0705426 | 1        | 637  | 17 | 0.00848325 |
| 0.0762353 | 1        | 648  | 18 | 0.00899525 |
| 0.0891795 | 1        | 825  | 23 | 0.00822726 |
| 0.102208  | 1        | 875  | 24 | 0.00597624 |
| 0.0881973 | 1        | 751  | 21 | 0.00484631 |
| 0.0449739 | 1        | 387  | 11 | 0.00719444 |
| 0.0691765 | 1        | 588  | 17 | 0.0088187  |
| 0.0691765 | 1        | 588  | 13 | 0.00514645 |
| 0.0702614 | 1        | 602  | 11 | 0.0092689  |
| 0.0406133 | 0.576412 | 602  | 11 | 0.0092689  |
| 0.0907069 | 1        | 775  | 21 | 0.00619692 |
| 0.0695294 | 1        | 591  | 17 | 0.00937483 |
| 0.0666744 | 1        | 573  | 12 | 0.00876573 |
| 0.0743529 | 1        | 632  | 17 | 0.00549072 |
| 0.0735294 | 1        | 625  | 15 | 0.00867746 |
| 0.158235  | 1        | 1345 | 37 | 0.00557017 |
| 0.0282755 | 0.180669 | 1345 | 37 | 0.00557017 |
| 0.0881213 | 1        | 750  | 15 | 0.00765347 |
| 0.0757647 | 1        | 644  | 18 | 0.00783884 |
| 0.0462353 | 1        | 393  | 12 | 0.00950725 |
| 0.0750505 | 1        | 743  | 21 | 0.00549955 |
| 0.0504113 | 1        | 668  | 18 | 0.00926008 |
| 0.0694118 | 1        | 590  | 17 | 0.00974559 |
| 0.0649495 | 1        | 585  | 17 | 0.00849208 |
| 0.0508161 | 1        | 660  | 18 | 0.00762698 |
| 0.0249141 | 1        | 602  | 17 | 0.0095249  |
| 0.0351325 | 1        | 606  | 17 | 0.00972794 |
| 0.0698824 | 1        | 594  | 17 | 0.00971028 |
| 0.0847059 | 1        | 720  | 20 | 0.00763581 |
| 0.0482803 | 1        | 598  | 17 | 0.00930421 |
| 0.0406648 | 1        | 641  | 18 | 0.00794477 |
| 0.0716471 | 1        | 609  | 16 | 0.00867746 |
| 0.0716471 | 1        | 609  | 16 | 0.00867746 |
| 0.0493798 | 1        | 633  | 18 | 0.00869511 |

|           |          |      |    |            |
|-----------|----------|------|----|------------|
| 0.0969669 | 1        | 828  | 23 | 0.00587913 |
| 0.060984  | 1        | 533  | 15 | 0.0076976  |
| 0.0714118 | 1        | 607  | 17 | 0.00604686 |
| 0.049878  | 1        | 654  | 19 | 0.00587913 |
| 0.067893  | 1        | 609  | 17 | 0.00983387 |
| 0.0766982 | 1        | 656  | 18 | 0.00731802 |
| 0.0719652 | 1        | 613  | 17 | 0.00943663 |
| 0.112235  | 1        | 954  | 20 | 0.00798008 |
| 0.0707059 | 1        | 601  | 17 | 0.00742395 |
| 0.0487864 | 1        | 601  | 11 | 0.0071503  |
| 0.0685056 | 1        | 601  | 11 | 0.0071503  |
| 0.0981176 | 1        | 834  | 24 | 0.00805953 |
| 0.0485053 | 1        | 417  | 12 | 0.00868629 |
| 0.0723529 | 1        | 615  | 17 | 0.00914532 |
| 0.0777087 | 1        | 662  | 19 | 0.00529652 |
| 0.0828241 | 1        | 881  | 25 | 0.00587913 |
| 0.0608254 | 1        | 647  | 18 | 0.00515528 |
| 0.0759553 | 1        | 646  | 18 | 0.0077594  |
| 0.0672651 | 1        | 607  | 15 | 0.00766229 |
| 0.0748857 | 1        | 639  | 18 | 0.00542893 |
| 0.104137  | 1        | 886  | 25 | 0.00888932 |
| 0.0318206 | 1        | 610  | 15 | 0.00937483 |
| 0.0627771 | 0.895175 | 601  | 17 | 0.00977207 |
| 0.0707059 | 1        | 601  | 17 | 0.00977207 |
| 0.0951934 | 1        | 812  | 20 | 0.00741512 |
| 0.0558439 | 1        | 850  | 24 | 0.00652354 |
| 0.0797885 | 1        | 679  | 19 | 0.00485514 |
| 0.0702614 | 1        | 602  | 17 | 0.00901291 |
| 0.0704176 | 1        | 602  | 15 | 0.00840381 |
| 0.126798  | 1        | 1084 | 30 | 0.0092689  |
| 0.0697647 | 1        | 599  | 12 | 0.00944545 |
| 0.0707358 | 1        | 671  | 19 | 0.00997511 |
| 0.103059  | 1        | 876  | 21 | 0.00851857 |
| 0.0851765 | 1        | 724  | 21 | 0.00732685 |
| 0.0687434 | 1        | 587  | 17 | 0.00615279 |
| 0.123176  | 1        | 1047 | 29 | 0.00865098 |
| 0.0305292 | 0.547112 | 658  | 19 | 0.00813898 |
| 0.0474953 | 1        | 658  | 19 | 0.00813898 |
| 0.0722353 | 1        | 614  | 17 | 0.0067354  |
| 0.0710345 | 1        | 618  | 12 | 0.00604686 |
| 0.0889412 | 1        | 756  | 19 | 0.00876573 |
| 0.0796736 | 1        | 791  | 19 | 0.00675306 |
| 0.0692941 | 1        | 589  | 17 | 0.00977207 |
| 0.0676115 | 1        | 582  | 16 | 0.00730919 |
| 0.0842462 | 1        | 846  | 24 | 0.00665596 |
| 0.0692324 | 1        | 671  | 19 | 0.00860684 |
| 0.0766612 | 1        | 743  | 21 | 0.00495224 |

|           |   |      |    |            |
|-----------|---|------|----|------------|
| 0.0554253 | 1 | 922  | 18 | 0.00845677 |
| 0.0251477 | 1 | 413  | 11 | 0.00537597 |
| 0.0368995 | 1 | 606  | 17 | 0.0074063  |
| 0.0912941 | 1 | 776  | 22 | 0.00775057 |
| 0.0613012 | 1 | 620  | 18 | 0.00953373 |
| 0.0837453 | 1 | 847  | 23 | 0.00835967 |
| 0.048465  | 1 | 592  | 17 | 0.00775057 |
| 0.049693  | 1 | 607  | 17 | 0.00928656 |
| 0.0636121 | 1 | 547  | 13 | 0.00697375 |
| 0.0918919 | 1 | 782  | 22 | 0.0083685  |
| 0.0362464 | 1 | 579  | 13 | 0.00920711 |
| 0.0582222 | 1 | 860  | 24 | 0.00815664 |
| 0.0875294 | 1 | 744  | 21 | 0.00608217 |
| 0.0785882 | 1 | 668  | 19 | 0.00829788 |
| 0.0337704 | 1 | 631  | 18 | 0.00774174 |
| 0.046829  | 1 | 875  | 25 | 0.00752105 |
| 0.0759433 | 1 | 1419 | 39 | 0.00845677 |
| 0.0872941 | 1 | 742  | 20 | 0.00754754 |
| 0.0707106 | 1 | 605  | 11 | 0.00500521 |
| 0.0588304 | 1 | 502  | 13 | 0.00965731 |
| 0.0735865 | 1 | 626  | 17 | 0.00847443 |
| 0.1099    | 1 | 938  | 26 | 0.00599389 |
| 0.128471  | 1 | 1092 | 30 | 0.00806836 |
| 0.128274  | 1 | 1092 | 30 | 0.00806836 |
| 0.0786042 | 1 | 669  | 19 | 0.0064794  |
| 0.100778  | 1 | 868  | 25 | 0.00536714 |
| 0.0717647 | 1 | 610  | 16 | 0.00813015 |
| 0.0721718 | 1 | 652  | 17 | 0.00780354 |
| 0.120023  | 1 | 1022 | 21 | 0.00682368 |
| 0.0733341 | 1 | 635  | 18 | 0.00905704 |
| 0.0692941 | 1 | 589  | 13 | 0.00762698 |
| 0.0691396 | 1 | 589  | 13 | 0.00762698 |
| 0.0689412 | 1 | 586  | 17 | 0.00990449 |
| 0.074     | 1 | 629  | 18 | 0.00517293 |
| 0.0632346 | 1 | 538  | 15 | 0.00859801 |
| 0.0969676 | 1 | 825  | 23 | 0.00873925 |
| 0.0689412 | 1 | 586  | 12 | 0.00879222 |
| 0.0689006 | 1 | 586  | 12 | 0.00879222 |
| 0.0695294 | 1 | 591  | 16 | 0.00895111 |
| 0.0694885 | 1 | 591  | 16 | 0.00895111 |
| 0.0811765 | 1 | 690  | 17 | 0.00617927 |
| 0.0584272 | 1 | 607  | 17 | 0.00765347 |
| 0.0639138 | 1 | 664  | 13 | 0.00972794 |
| 0.105506  | 1 | 939  | 24 | 0.00774174 |
| 0.0763317 | 1 | 695  | 18 | 0.00805071 |
| 0.0698824 | 1 | 594  | 17 | 0.00819195 |
| 0.0714118 | 1 | 607  | 17 | 0.00884518 |

|           |          |      |    |            |
|-----------|----------|------|----|------------|
| 0.0715294 | 1        | 608  | 17 | 0.00772409 |
| 0.0811765 | 1        | 690  | 19 | 0.0080154  |
| 0.0911765 | 1        | 775  | 21 | 0.00850974 |
| 0.0903529 | 1        | 768  | 20 | 0.0063823  |
| 0.0764706 | 1        | 650  | 18 | 0.0049699  |
| 0.0964706 | 1        | 820  | 21 | 0.00868629 |
| 0.0327625 | 1        | 595  | 17 | 0.00986035 |
| 0.119831  | 1        | 1020 | 29 | 0.00913649 |
| 0.0138434 | 0.284034 | 595  | 17 | 0.00826257 |
| 0.0760976 | 1        | 929  | 26 | 0.00882753 |
| 0.0751641 | 1        | 687  | 13 | 0.00468742 |
| 0.0655085 | 1        | 592  | 13 | 0.00723857 |
| 0.0820048 | 1        | 715  | 19 | 0.00804188 |
| 0.0811331 | 1        | 759  | 21 | 0.0072474  |
| 0.0880817 | 1        | 759  | 21 | 0.0072474  |
| 0.0705882 | 1        | 600  | 12 | 0.0080154  |
| 0.101529  | 1        | 863  | 24 | 0.00876573 |
| 0.0370802 | 1        | 604  | 10 | 0.00991331 |
| 0.0557647 | 1        | 474  | 13 | 0.0071503  |
| 0.0529191 | 1        | 862  | 24 | 0.0085627  |
| 0.0875294 | 1        | 744  | 16 | 0.00576437 |
| 0.0330033 | 1        | 710  | 18 | 0.00571141 |
| 0.0852941 | 1        | 725  | 20 | 0.00553486 |
| 0.0992941 | 1        | 844  | 24 | 0.0074063  |
| 0.0977984 | 1        | 844  | 24 | 0.0074063  |
| 0.0763905 | 1        | 651  | 18 | 0.00408714 |
| 0.0737869 | 1        | 628  | 18 | 0.00509348 |
| 0.0670097 | 1        | 586  | 12 | 0.00978973 |
| 0.108736  | 1        | 926  | 25 | 0.00414011 |
| 0.0811114 | 1        | 724  | 20 | 0.00804188 |
| 0.109882  | 1        | 934  | 26 | 0.00984269 |
| 0.0750469 | 1        | 640  | 11 | 0.00639996 |
| 0.0880451 | 1        | 749  | 21 | 0.00688547 |
| 0.0777609 | 1        | 664  | 17 | 0.00886284 |
| 0.0690355 | 1        | 612  | 16 | 0.00798008 |
| 0.0701373 | 1        | 613  | 17 | 0.00960435 |
| 0.0696796 | 1        | 609  | 16 | 0.00906587 |
| 0.0812207 | 1        | 692  | 18 | 0.00813015 |
| 0.0725825 | 1        | 629  | 18 | 0.00833319 |
| 0.0723529 | 1        | 615  | 17 | 0.00943663 |
| 0.0698824 | 1        | 594  | 17 | 0.00990449 |
| 0.0697429 | 1        | 594  | 17 | 0.00990449 |
| 0.0777647 | 1        | 661  | 19 | 0.00466976 |
| 0.0776095 | 1        | 661  | 19 | 0.00466976 |
| 0.0776471 | 1        | 660  | 17 | 0.00860684 |
| 0.0803529 | 1        | 683  | 14 | 0.00850974 |
| 0.0592941 | 1        | 504  | 14 | 0.00727388 |

|           |          |      |    |            |
|-----------|----------|------|----|------------|
| 0.0834118 | 1        | 709  | 15 | 0.00838615 |
| 0.0792941 | 1        | 674  | 19 | 0.00833319 |
| 0.0828078 | 1        | 709  | 19 | 0.00775057 |
| 0.0510682 | 1        | 796  | 20 | 0.0068943  |
| 0.091742  | 1        | 781  | 22 | 0.00873925 |
| 0.0674506 | 1        | 608  | 17 | 0.00911884 |
| 0.0590703 | 1        | 1084 | 30 | 0.00838615 |
| 0.0321508 | 1        | 590  | 15 | 0.00797126 |
| 0.0692895 | 1        | 590  | 15 | 0.00797126 |
| 0.0408697 | 1        | 750  | 16 | 0.00489045 |
| 0.0786847 | 0.893333 | 750  | 16 | 0.00489045 |
| 0.111647  | 1        | 949  | 24 | 0.00794477 |
| 0.082     | 1        | 697  | 19 | 0.00611748 |
| 0.0362557 | 1        | 562  | 16 | 0.00788298 |
| 0.0697647 | 1        | 593  | 17 | 0.00980738 |
| 0.0729412 | 1        | 620  | 15 | 0.00759167 |
| 0.0694477 | 1        | 591  | 17 | 0.00759167 |
| 0.118768  | 1        | 1041 | 30 | 0.00469624 |
| 0.0719054 | 1        | 614  | 14 | 0.00665596 |
| 0.0582353 | 1        | 495  | 14 | 0.0074063  |
| 0.100824  | 1        | 857  | 24 | 0.00759167 |
| 0.0452875 | 1        | 604  | 15 | 0.00849208 |
| 0.0707059 | 1        | 601  | 17 | 0.0078565  |
| 0.104776  | 1        | 895  | 20 | 0.00634699 |
| 0.0394459 | 1        | 561  | 16 | 0.00974559 |
| 0.0545369 | 1        | 464  | 13 | 0.00690313 |
| 0.0911765 | 1        | 775  | 22 | 0.00526121 |
| 0.0406158 | 1        | 620  | 18 | 0.00911884 |
| 0.0707059 | 1        | 601  | 17 | 0.00894229 |
| 0.0680303 | 1        | 602  | 17 | 0.00722092 |
| 0.0700352 | 1        | 596  | 17 | 0.00926008 |
| 0.069394  | 1        | 592  | 14 | 0.00747692 |
| 0.0666965 | 1        | 596  | 17 | 0.00984269 |
| 0.0867059 | 1        | 737  | 21 | 0.00572024 |
| 0.0741021 | 1        | 782  | 22 | 0.00838615 |
| 0.0710588 | 1        | 604  | 16 | 0.00911001 |
| 0.154353  | 1        | 1312 | 35 | 0.00834201 |
| 0.0374389 | 1        | 666  | 19 | 0.00629403 |
| 0.122626  | 1        | 1046 | 28 | 0.00923359 |
| 0.0403529 | 1        | 686  | 18 | 0.0063823  |
| 0.0676382 | 1        | 608  | 17 | 0.00762698 |
| 0.0658583 | 1        | 592  | 17 | 0.00949842 |
| 0.107899  | 1        | 922  | 20 | 0.0075034  |
| 0.12702   | 1        | 1116 | 32 | 0.00772409 |
| 0.0597641 | 1        | 598  | 17 | 0.00447556 |
| 0.0598641 | 1        | 599  | 17 | 0.00990449 |
| 0.0672596 | 1        | 673  | 18 | 0.00843912 |

|            |           |      |    |            |
|------------|-----------|------|----|------------|
| 0.0485075  | 1         | 611  | 17 | 0.00890698 |
| 0.0705787  | 1         | 611  | 17 | 0.00890698 |
| 0.0340435  | 1         | 735  | 20 | 0.00411363 |
| 0.0798824  | 1         | 679  | 14 | 0.00614396 |
| 0.0734118  | 1         | 624  | 17 | 0.00712381 |
| 0.0727059  | 1         | 618  | 17 | 0.00965731 |
| 0.0831765  | 1         | 707  | 17 | 0.00918946 |
| 0.1028     | 1         | 881  | 18 | 0.00495224 |
| 0.0447948  | 1         | 608  | 17 | 0.00802422 |
| 0.0551094  | 1         | 748  | 21 | 0.00808601 |
| 0.0997647  | 1         | 848  | 23 | 0.00727388 |
| 0.067858   | 1         | 600  | 11 | 0.00977207 |
| 0.0672786  | 1         | 579  | 17 | 0.00727388 |
| 0.0648895  | 1         | 555  | 14 | 0.00781236 |
| 0.0528009  | 1         | 591  | 17 | 0.00964849 |
| 0.0539623  | 1         | 604  | 17 | 0.00818312 |
| 0.0735577  | 1         | 649  | 18 | 0.00943663 |
| 0.0752063  | 1         | 647  | 19 | 0.00430783 |
| 0.0648611  | 1         | 558  | 15 | 0.00972794 |
| 0.0832268  | 1         | 716  | 20 | 0.00913649 |
| 0.0927382  | 1         | 802  | 21 | 0.00880104 |
| 0.0670718  | 1         | 596  | 12 | 0.0080154  |
| 0.0768625  | 1         | 683  | 19 | 0.00718561 |
| 0.072      | 1         | 612  | 17 | 0.00640879 |
| 0.0794118  | 1         | 675  | 19 | 0.00472273 |
| 0.0831765  | 1         | 707  | 20 | 0.00565844 |
| 0.0876471  | 1         | 745  | 21 | 0.00818312 |
| 0.0588008  | 1         | 609  | 17 | 0.00880987 |
| 0.0716471  | 1         | 609  | 17 | 0.00880987 |
| 0.0672975  | 1         | 697  | 20 | 0.00786533 |
| 0.080268   | 1         | 683  | 13 | 0.00622341 |
| 0.0685882  | 0.934295  | 624  | 18 | 0.00816546 |
| 0.0990588  | 1         | 842  | 23 | 0.00842146 |
| 0.00411765 | 0.0564516 | 620  | 18 | 0.0086245  |
| 0.0710588  | 1         | 604  | 17 | 0.00840381 |
| 0.0632763  | 1         | 540  | 15 | 0.00512879 |
| 0.0682353  | 1         | 580  | 15 | 0.00792712 |
| 0.103529   | 1         | 880  | 25 | 0.00880104 |
| 0.0688235  | 1         | 585  | 15 | 0.00996628 |
| 0.0765882  | 1         | 651  | 19 | 0.00762698 |
| 0.0858622  | 1         | 730  | 21 | 0.00871277 |
| 0.0923529  | 1         | 785  | 20 | 0.00653237 |
| 0.0838824  | 1         | 713  | 21 | 0.00860684 |
| 0.129289   | 1         | 1217 | 33 | 0.00873925 |
| 0.0822353  | 1         | 699  | 17 | 0.00564962 |
| 0.126      | 1         | 1071 | 30 | 0.00845677 |
| 0.0817647  | 1         | 695  | 19 | 0.00430783 |

|           |        |      |    |            |
|-----------|--------|------|----|------------|
| 0.0679361 | 1      | 578  | 10 | 0.00949842 |
| 0.0897158 | 1      | 827  | 24 | 0.00499638 |
| 0.0410798 | 1      | 595  | 10 | 0.00731802 |
| 0.0809255 | 1      | 731  | 21 | 0.00558783 |
| 0.0592941 | 0.5356 | 941  | 27 | 0.00546424 |
| 0.110537  | 1      | 941  | 27 | 0.00546424 |
| 0.181647  | 1      | 1544 | 43 | 0.00822726 |
| 0.0616789 | 1      | 615  | 16 | 0.00928656 |
| 0.0722157 | 1      | 616  | 18 | 0.00988683 |
| 0.110434  | 1      | 942  | 27 | 0.00664713 |
| 0.0375656 | 1      | 616  | 18 | 0.00880104 |
| 0.0371387 | 1      | 609  | 17 | 0.0095867  |
| 0.0706528 | 1      | 605  | 12 | 0.00503169 |
| 0.0855294 | 1      | 727  | 19 | 0.00821843 |
| 0.086369  | 1      | 735  | 19 | 0.00726506 |
| 0.0924794 | 1      | 787  | 22 | 0.00515528 |
| 0.0655549 | 1      | 570  | 16 | 0.00911001 |
| 0.0687032 | 1      | 605  | 17 | 0.00772409 |
| 0.0525882 | 1      | 447  | 13 | 0.00615279 |
| 0.0736916 | 1      | 628  | 15 | 0.00539362 |
| 0.0569468 | 1      | 614  | 17 | 0.0060292  |
| 0.0852941 | 1      | 725  | 20 | 0.00758285 |
| 0.0441157 | 1      | 650  | 11 | 0.00746809 |
| 0.0743569 | 1      | 633  | 18 | 0.00839498 |
| 0.0743354 | 1      | 632  | 17 | 0.00678837 |
| 0.0990588 | 1      | 842  | 20 | 0.00736216 |
| 0.0690747 | 1      | 589  | 17 | 0.00938366 |
| 0.0399075 | 1      | 604  | 17 | 0.00730036 |
| 0.0704706 | 1      | 599  | 11 | 0.00959552 |
| 0.0762095 | 1      | 649  | 17 | 0.00737099 |
| 0.115647  | 1      | 983  | 26 | 0.00555251 |
| 0.0524877 | 1      | 864  | 24 | 0.00729154 |
| 0.058293  | 1      | 614  | 16 | 0.00805071 |
| 0.0794015 | 1      | 865  | 24 | 0.00820077 |
| 0.111059  | 1      | 944  | 25 | 0.0052259  |
| 0.0754118 | 1      | 641  | 18 | 0.0061881  |
| 0.0592941 | 1      | 504  | 10 | 0.00730919 |
| 0.0896816 | 1      | 797  | 22 | 0.00505817 |
| 0.067777  | 1      | 586  | 15 | 0.00865981 |
| 0.0867079 | 1      | 743  | 20 | 0.00865098 |
| 0.0895294 | 1      | 761  | 20 | 0.00665596 |
| 0.102706  | 1      | 873  | 20 | 0.00680602 |
| 0.118994  | 1      | 1013 | 27 | 0.00735333 |
| 0.0702353 | 1      | 597  | 17 | 0.00687664 |
| 0.0785396 | 1      | 669  | 19 | 0.00573789 |
| 0.0631604 | 1      | 538  | 14 | 0.00921594 |
| 0.0396788 | 1      | 667  | 19 | 0.00539362 |

|           |          |      |    |            |
|-----------|----------|------|----|------------|
| 0.0701527 | 1        | 703  | 20 | 0.0040077  |
| 0.130972  | 1        | 1176 | 34 | 0.0068943  |
| 0.117104  | 0.69508  | 1443 | 41 | 0.00562313 |
| 0.0765393 | 0.531532 | 1443 | 41 | 0.00562313 |
| 0.0984238 | 1        | 843  | 24 | 0.00866863 |
| 0.0800749 | 1        | 684  | 18 | 0.0081125  |
| 0.0770858 | 1        | 656  | 18 | 0.00901291 |
| 0.0335957 | 1        | 606  | 17 | 0.00919828 |
| 0.0337066 | 1        | 608  | 17 | 0.00629403 |
| 0.0493957 | 1        | 891  | 25 | 0.0068943  |
| 0.0433569 | 1        | 668  | 19 | 0.00398121 |
| 0.0399169 | 1        | 615  | 18 | 0.00780354 |
| 0.0708235 | 1        | 602  | 17 | 0.00694727 |
| 0.0436471 | 0.526241 | 705  | 19 | 0.00780354 |
| 0.0751765 | 1        | 639  | 13 | 0.00726506 |
| 0.10067   | 1        | 857  | 24 | 0.00412246 |
| 0.0990179 | 1        | 857  | 24 | 0.00412246 |
| 0.0765134 | 1        | 704  | 20 | 0.00749457 |
| 0.067384  | 1        | 620  | 17 | 0.00988683 |
| 0.0677647 | 1        | 576  | 13 | 0.00784767 |
| 0.0717557 | 1        | 611  | 16 | 0.00659416 |
| 0.071562  | 1        | 613  | 17 | 0.00746809 |
| 0.0381494 | 1        | 597  | 17 | 0.00681485 |
| 0.0353904 | 1        | 597  | 17 | 0.00681485 |
| 0.0374465 | 1        | 586  | 16 | 0.00761816 |
| 0.0347383 | 1        | 586  | 16 | 0.00761816 |
| 0.072912  | 1        | 1141 | 32 | 0.00637347 |
| 0.0676389 | 1        | 1141 | 32 | 0.00637347 |
| 0.0556198 | 1        | 529  | 15 | 0.00780354 |
| 0.0722631 | 1        | 903  | 26 | 0.0077594  |
| 0.0495359 | 1        | 619  | 13 | 0.00765347 |
| 0.0876483 | 1        | 953  | 27 | 0.00749457 |
| 0.0767038 | 1        | 834  | 24 | 0.00555251 |
| 0.0908235 | 1        | 772  | 22 | 0.00589679 |
| 0.0882353 | 1        | 750  | 20 | 0.00833319 |
| 0.0334617 | 1        | 669  | 18 | 0.00826257 |
| 0.0413943 | 0.77268  | 959  | 27 | 0.00859801 |
| 0.0479668 | 1        | 959  | 27 | 0.00859801 |
| 0.0344673 | 1        | 617  | 13 | 0.00817429 |
| 0.0308608 | 1        | 617  | 13 | 0.00817429 |
| 0.0699276 | 1        | 599  | 17 | 0.00949842 |
| 0.0754118 | 1        | 641  | 18 | 0.00676189 |
| 0.0689331 | 1        | 586  | 16 | 0.0076005  |
| 0.084061  | 1        | 722  | 20 | 0.00758285 |
| 0.122941  | 1        | 1045 | 29 | 0.00784767 |
| 0.0670215 | 1        | 1045 | 29 | 0.00784767 |
| 0.0787059 | 1        | 669  | 19 | 0.00626754 |



|           |   |      |    |            |
|-----------|---|------|----|------------|
| 0.0360574 | 1 | 593  | 17 | 0.00630285 |
| 0.0389761 | 1 | 606  | 17 | 0.00937483 |
| 0.0368479 | 1 | 606  | 17 | 0.00937483 |
| 0.0818824 | 1 | 696  | 17 | 0.00837732 |
| 0.0474016 | 1 | 737  | 21 | 0.00533183 |
| 0.0725882 | 1 | 617  | 18 | 0.00896877 |
| 0.0698824 | 1 | 594  | 17 | 0.00943663 |
| 0.143779  | 1 | 1270 | 35 | 0.00640879 |
| 0.0628184 | 1 | 1270 | 35 | 0.00640879 |
| 0.0711132 | 1 | 612  | 18 | 0.00964849 |
| 0.0747059 | 1 | 635  | 18 | 0.00791829 |
| 0.11708   | 1 | 996  | 21 | 0.00928656 |
| 0.0718626 | 1 | 615  | 16 | 0.00906587 |
| 0.0769773 | 1 | 655  | 17 | 0.00793595 |
| 0.100247  | 1 | 853  | 19 | 0.00641761 |
| 0.0739565 | 1 | 629  | 18 | 0.0064441  |
| 0.0668236 | 1 | 653  | 17 | 0.00645292 |
| 0.103647  | 1 | 881  | 25 | 0.00693844 |
| 0.0689372 | 1 | 587  | 16 | 0.00926008 |
| 0.0729412 | 1 | 620  | 18 | 0.00890698 |
| 0.0721176 | 1 | 613  | 13 | 0.00766229 |
| 0.0763224 | 1 | 948  | 27 | 0.00484631 |
| 0.0652121 | 1 | 810  | 21 | 0.00731802 |
| 0.0704623 | 1 | 599  | 10 | 0.00766229 |
| 0.0870019 | 1 | 751  | 21 | 0.00601155 |
| 0.0498245 | 1 | 795  | 22 | 0.00765347 |
| 0.0499424 | 1 | 607  | 15 | 0.00869511 |
| 0.0775054 | 1 | 942  | 26 | 0.00694727 |
| 0.0861176 | 1 | 732  | 17 | 0.00480217 |
| 0.0723414 | 1 | 617  | 12 | 0.00849208 |
| 0.0785555 | 1 | 670  | 19 | 0.00730919 |
| 0.0664416 | 1 | 610  | 17 | 0.00894229 |
| 0.0703977 | 1 | 600  | 17 | 0.00611748 |
| 0.0715294 | 1 | 608  | 16 | 0.00662947 |
| 0.117176  | 1 | 996  | 28 | 0.00641761 |
| 0.0383899 | 1 | 598  | 15 | 0.00849208 |
| 0.107609  | 1 | 956  | 26 | 0.00634699 |
| 0.04251   | 1 | 880  | 25 | 0.00470507 |
| 0.0535294 | 1 | 455  | 13 | 0.00777705 |
| 0.0605032 | 1 | 606  | 17 | 0.0063823  |
| 0.0504274 | 1 | 584  | 15 | 0.00595858 |
| 0.0531042 | 1 | 615  | 17 | 0.00737099 |
| 0.113059  | 1 | 961  | 24 | 0.00735333 |
| 0.0870433 | 1 | 741  | 16 | 0.00898642 |
| 0.079408  | 1 | 676  | 12 | 0.00849208 |
| 0.0970588 | 1 | 825  | 21 | 0.00869511 |
| 0.0689938 | 1 | 589  | 17 | 0.00873925 |

|             |            |     |    |            |
|-------------|------------|-----|----|------------|
| 0.0246515   | 1          | 458 | 13 | 0.00775057 |
| 0.0356316   | 1          | 662 | 18 | 0.00873925 |
| 0.11059     | 1          | 944 | 22 | 0.00587913 |
| 0.0691765   | 1          | 588 | 15 | 0.00640879 |
| 0.0334893   | 1          | 587 | 15 | 0.00747692 |
| 0.0689696   | 1          | 587 | 15 | 0.00747692 |
| 0.053115    | 1          | 931 | 25 | 0.0085627  |
| 0.109388    | 1          | 931 | 25 | 0.0085627  |
| 0.0873908   | 1          | 770 | 22 | 0.00815664 |
| 0.0695156   | 1          | 597 | 13 | 0.00641761 |
| 0.0938124   | 1          | 799 | 22 | 0.00670009 |
| 0.0868646   | 0.977472   | 799 | 22 | 0.00670009 |
| 0.0750264   | 1          | 639 | 18 | 0.00869511 |
| 0.0708745   | 0.621009   | 971 | 23 | 0.00501404 |
| 0.0704082   | 1          | 971 | 23 | 0.00501404 |
| 0.0738129   | 1          | 628 | 14 | 0.00777705 |
| 0.0713446   | 1          | 607 | 14 | 0.00814781 |
| 0.0695294   | 1          | 591 | 17 | 0.00807719 |
| 0.0695294   | 1          | 591 | 17 | 0.00807719 |
| 0.0924706   | 1          | 786 | 22 | 0.0056761  |
| 0.0698654   | 1          | 597 | 17 | 0.00752105 |
| 0.0627035   | 1          | 597 | 17 | 0.00752105 |
| 0.000321916 | 0.00809062 | 618 | 13 | 0.0093307  |
| 0.045488    | 1          | 618 | 13 | 0.0093307  |
| 0.0774501   | 1          | 667 | 18 | 0.00736216 |
| 0.0709768   | 1          | 606 | 14 | 0.00964849 |
| 0.0794182   | 1          | 688 | 20 | 0.00575555 |
| 0.0717043   | 1          | 613 | 11 | 0.00816546 |
| 0.0776471   | 1          | 660 | 14 | 0.00900408 |
| 0.0630179   | 0.985401   | 548 | 15 | 0.00868629 |
| 0.0729412   | 1          | 620 | 17 | 0.00798008 |
| 0.0855972   | 1          | 731 | 21 | 0.00745043 |
| 0.0856841   | 1          | 729 | 20 | 0.00805071 |
| 0.0295693   | 0.433007   | 612 | 17 | 0.00868629 |
| 0.0214812   | 1          | 612 | 17 | 0.00868629 |
| 0.0658335   | 1          | 590 | 14 | 0.00777705 |
| 0.020709    | 1          | 590 | 14 | 0.00777705 |
| 0.0687347   | 1          | 616 | 18 | 0.00632051 |
| 0.0114075   | 0.527597   | 616 | 18 | 0.00632051 |
| 0.0964882   | 1          | 838 | 24 | 0.00782119 |
| 0.0655237   | 1          | 558 | 15 | 0.00657651 |
| 0.0677548   | 1          | 577 | 16 | 0.00468742 |
| 0.0486844   | 1          | 853 | 23 | 0.00720326 |
| 0.0992784   | 1          | 853 | 23 | 0.00720326 |
| 0.0253206   | 1          | 620 | 11 | 0.00744161 |
| 0.0245446   | 1          | 601 | 17 | 0.00683251 |
| 0.0857647   | 1          | 729 | 20 | 0.0071503  |

|           |   |      |    |            |
|-----------|---|------|----|------------|
| 0.0745779 | 1 | 636  | 18 | 0.00737981 |
| 0.0434144 | 1 | 473  | 10 | 0.00963083 |
| 0.044384  | 1 | 473  | 10 | 0.00963083 |
| 0.088     | 1 | 748  | 21 | 0.00525238 |
| 0.0363409 | 1 | 551  | 11 | 0.00873925 |
| 0.0460452 | 1 | 737  | 21 | 0.00733567 |
| 0.072     | 1 | 612  | 16 | 0.0083685  |
| 0.0814118 | 1 | 692  | 14 | 0.0083067  |
| 0.0805882 | 1 | 685  | 14 | 0.005067   |
| 0.0745882 | 1 | 634  | 18 | 0.00503169 |
| 0.0656257 | 1 | 559  | 16 | 0.0065412  |
| 0.118941  | 1 | 1011 | 27 | 0.00825374 |
| 0.0728235 | 1 | 619  | 10 | 0.00509348 |
| 0.113882  | 1 | 968  | 25 | 0.00653237 |
| 0.0716471 | 1 | 609  | 17 | 0.00844794 |
| 0.07189   | 1 | 612  | 14 | 0.00986918 |
| 0.0730588 | 1 | 621  | 17 | 0.00686782 |
| 0.0391183 | 1 | 646  | 16 | 0.00731802 |
| 0.0709851 | 1 | 606  | 14 | 0.00988683 |
| 0.0710588 | 1 | 604  | 17 | 0.00745926 |
| 0.0486036 | 1 | 630  | 18 | 0.00798008 |
| 0.0821341 | 1 | 702  | 13 | 0.00648823 |
| 0.122031  | 1 | 1043 | 27 | 0.0077594  |
| 0.107786  | 1 | 922  | 26 | 0.00508466 |
| 0.0365311 | 1 | 599  | 17 | 0.00730919 |
| 0.0710588 | 1 | 604  | 13 | 0.00885401 |
| 0.0694058 | 1 | 598  | 17 | 0.00965731 |
| 0.120353  | 1 | 1023 | 24 | 0.00488162 |
| 0.0721176 | 1 | 613  | 17 | 0.00901291 |
| 0.0823267 | 1 | 702  | 20 | 0.00537597 |
| 0.0710287 | 1 | 609  | 17 | 0.00973676 |
| 0.110118  | 1 | 936  | 22 | 0.00743278 |
| 0.0714118 | 1 | 607  | 17 | 0.00935718 |
| 0.0522006 | 1 | 612  | 18 | 0.00988683 |
| 0.0694705 | 1 | 593  | 17 | 0.00976324 |
| 0.046875  | 1 | 609  | 17 | 0.00955139 |
| 0.078     | 1 | 663  | 18 | 0.00512879 |
| 0.0696366 | 1 | 594  | 11 | 0.00901291 |
| 0.0832256 | 1 | 708  | 20 | 0.0041048  |
| 0.0662353 | 1 | 563  | 16 | 0.00971911 |
| 0.112542  | 1 | 961  | 27 | 0.00417542 |
| 0.0712914 | 1 | 668  | 19 | 0.00474038 |
| 0.0914192 | 1 | 782  | 22 | 0.00829788 |
| 0.131284  | 1 | 1123 | 28 | 0.00564079 |
| 0.0971435 | 1 | 857  | 24 | 0.00736216 |
| 0.0698254 | 1 | 616  | 17 | 0.0062852  |
| 0.0633458 | 1 | 646  | 17 | 0.00697375 |

|           |          |      |    |            |
|-----------|----------|------|----|------------|
| 0.0698824 | 1        | 594  | 12 | 0.00945428 |
| 0.0559494 | 1        | 584  | 16 | 0.00509348 |
| 0.100824  | 1        | 857  | 24 | 0.00738864 |
| 0.0695012 | 1        | 595  | 16 | 0.00719444 |
| 0.0968235 | 1        | 823  | 23 | 0.00511114 |
| 0.0992941 | 1        | 844  | 22 | 0.00474921 |
| 0.0882595 | 1        | 751  | 21 | 0.00611748 |
| 0.0742783 | 1        | 633  | 18 | 0.00875691 |
| 0.0715794 | 1        | 610  | 17 | 0.00817429 |
| 0.0713699 | 1        | 608  | 13 | 0.00966614 |
| 0.0408363 | 1        | 668  | 19 | 0.00678837 |
| 0.076     | 1        | 646  | 16 | 0.00794477 |
| 0.0444081 | 0.484076 | 785  | 20 | 0.00484631 |
| 0.0919527 | 1        | 785  | 20 | 0.00484631 |
| 0.0824718 | 1        | 702  | 20 | 0.00486397 |
| 0.082     | 1        | 697  | 14 | 0.00745043 |
| 0.0895294 | 1        | 761  | 19 | 0.00520824 |
| 0.0729412 | 1        | 620  | 13 | 0.0093307  |
| 0.0869412 | 1        | 739  | 21 | 0.00508466 |
| 0.0921176 | 1        | 783  | 22 | 0.00763581 |
| 0.0904706 | 1        | 769  | 21 | 0.00802422 |
| 0.094202  | 1        | 801  | 23 | 0.00765347 |
| 0.100824  | 1        | 857  | 22 | 0.00665596 |
| 0.039627  | 1        | 340  | 10 | 0.00946311 |
| 0.0724942 | 1        | 622  | 17 | 0.00725623 |
| 0.0709412 | 1        | 603  | 17 | 0.00966614 |
| 0.078     | 1        | 663  | 18 | 0.00745926 |
| 0.0460317 | 1        | 725  | 20 | 0.0077594  |
| 0.0202159 | 1        | 646  | 13 | 0.00592327 |
| 0.0712776 | 1        | 607  | 17 | 0.00499638 |
| 0.0763529 | 1        | 649  | 17 | 0.00730919 |
| 0.0671098 | 1        | 737  | 21 | 0.00894229 |
| 0.0764706 | 1        | 650  | 18 | 0.00473156 |
| 0.0457442 | 1        | 646  | 18 | 0.00617044 |
| 0.0711765 | 1        | 605  | 17 | 0.00936601 |
| 0.0822353 | 1        | 699  | 20 | 0.00569376 |
| 0.0832941 | 1        | 708  | 17 | 0.00530534 |
| 0.0782353 | 1        | 665  | 17 | 0.00505817 |
| 0.0712438 | 1        | 606  | 17 | 0.00851857 |
| 0.0784542 | 1        | 674  | 19 | 0.00489045 |
| 0.0699569 | 1        | 601  | 14 | 0.00741512 |
| 0.122741  | 1        | 1148 | 32 | 0.00763581 |
| 0.0242099 | 1        | 632  | 18 | 0.00763581 |
| 0.0704176 | 1        | 602  | 17 | 0.00745043 |
| 0.0745882 | 1        | 634  | 18 | 0.00971028 |
| 0.0868682 | 1        | 983  | 16 | 0.0072474  |
| 0.114649  | 1        | 983  | 16 | 0.0072474  |

|           |          |      |    |            |
|-----------|----------|------|----|------------|
| 0.0689615 | 1        | 589  | 17 | 0.00556134 |
| 0.0892941 | 1        | 759  | 15 | 0.00481983 |
| 0.0843529 | 1        | 717  | 19 | 0.00873925 |
| 0.0372862 | 1        | 593  | 17 | 0.00918946 |
| 0.119529  | 1        | 1016 | 28 | 0.00617044 |
| 0.0318824 | 0.380618 | 712  | 19 | 0.00659416 |
| 0.0609301 | 1        | 866  | 24 | 0.00594975 |
| 0.041652  | 1        | 592  | 17 | 0.00715913 |
| 0.0415113 | 1        | 590  | 15 | 0.00827139 |
| 0.0906848 | 1        | 772  | 22 | 0.00706202 |
| 0.028148  | 1        | 642  | 18 | 0.00500521 |
| 0.0769412 | 1        | 654  | 18 | 0.00721209 |
| 0.0557573 | 1        | 476  | 14 | 0.00928656 |
| 0.0696471 | 1        | 592  | 12 | 0.00847443 |
| 0.0708235 | 1        | 602  | 13 | 0.00735333 |
| 0.0732506 | 1        | 626  | 16 | 0.00855387 |
| 0.0264305 | 1        | 679  | 19 | 0.00681485 |
| 0.0447256 | 1        | 1149 | 29 | 0.00707085 |
| 0.0263137 | 1        | 676  | 19 | 0.00629403 |
| 0.0729412 | 1        | 620  | 18 | 0.00686782 |
| 0.0816709 | 1        | 741  | 20 | 0.00528769 |
| 0.0560239 | 1        | 638  | 16 | 0.00863332 |
| 0.107596  | 1        | 915  | 23 | 0.00764464 |
| 0.0433439 | 1        | 603  | 17 | 0.00998393 |
| 0.0543771 | 1        | 464  | 13 | 0.00790946 |
| 0.075     | 1        | 654  | 18 | 0.00617044 |
| 0.0503319 | 1        | 599  | 17 | 0.00749457 |
| 0.0637301 | 1        | 544  | 16 | 0.00712381 |
| 0.0171765 | 0.268382 | 544  | 16 | 0.00712381 |
| 0.0704706 | 1        | 599  | 17 | 0.0085627  |
| 0.0755597 | 1        | 648  | 17 | 0.00835967 |
| 0.073695  | 1        | 648  | 17 | 0.00835967 |
| 0.0765612 | 1        | 651  | 18 | 0.00531417 |
| 0.0693882 | 1        | 651  | 18 | 0.00531417 |
| 0.0691765 | 1        | 588  | 13 | 0.00898642 |
| 0.0164706 | 0.238095 | 588  | 13 | 0.00898642 |
| 0.0673188 | 1        | 585  | 15 | 0.00712381 |
| 0.0688235 | 1        | 585  | 15 | 0.00712381 |
| 0.0811856 | 1        | 693  | 18 | 0.00726506 |
| 0.0927377 | 1        | 793  | 19 | 0.00752105 |
| 0.0861176 | 1        | 732  | 19 | 0.00587913 |
| 0.0788235 | 1        | 670  | 19 | 0.00634699 |
| 0.0942657 | 1        | 1034 | 29 | 0.00737099 |
| 0.0783529 | 1        | 666  | 17 | 0.00662065 |
| 0.0932941 | 1        | 793  | 20 | 0.00858036 |
| 0.100588  | 1        | 855  | 19 | 0.00752988 |
| 0.0679623 | 1        | 584  | 16 | 0.00913649 |

|           |   |      |    |            |
|-----------|---|------|----|------------|
| 0.0729987 | 1 | 621  | 18 | 0.005323   |
| 0.069002  | 1 | 587  | 17 | 0.00999276 |
| 0.0710254 | 1 | 604  | 17 | 0.00549955 |
| 0.0453287 | 1 | 753  | 21 | 0.00903056 |
| 0.0918164 | 1 | 782  | 22 | 0.00843912 |
| 0.066918  | 1 | 710  | 20 | 0.00865098 |
| 0.0717647 | 1 | 610  | 16 | 0.00986918 |
| 0.0698824 | 1 | 594  | 17 | 0.00483749 |
| 0.0727059 | 1 | 618  | 14 | 0.00874808 |
| 0.0502706 | 1 | 836  | 23 | 0.00581734 |
| 0.0161424 | 1 | 1010 | 25 | 0.00876573 |
| 0.0676866 | 1 | 584  | 14 | 0.00472273 |
| 0.0689412 | 1 | 586  | 16 | 0.00946311 |
| 0.110446  | 1 | 941  | 27 | 0.00764464 |
| 0.0728235 | 1 | 619  | 18 | 0.00725623 |
| 0.0711765 | 1 | 605  | 16 | 0.00876573 |
| 0.0786939 | 1 | 670  | 19 | 0.00792712 |
| 0.076     | 1 | 646  | 16 | 0.00467859 |
| 0.0658469 | 1 | 573  | 16 | 0.00849208 |
| 0.111124  | 1 | 946  | 22 | 0.00848325 |
| 0.0792941 | 1 | 674  | 19 | 0.00687664 |
| 0.0602866 | 1 | 589  | 15 | 0.00825374 |
| 0.0619243 | 1 | 605  | 16 | 0.00919828 |
| 0.0725691 | 1 | 709  | 20 | 0.0086245  |
| 0.0695791 | 1 | 610  | 16 | 0.00867746 |
| 0.0625159 | 1 | 736  | 21 | 0.00661182 |
| 0.078599  | 1 | 671  | 18 | 0.00849208 |
| 0.0830861 | 1 | 728  | 17 | 0.00594093 |
| 0.179765  | 1 | 1528 | 42 | 0.00794477 |
| 0.0829412 | 1 | 705  | 15 | 0.00706202 |
| 0.090411  | 1 | 858  | 24 | 0.00645292 |
| 0.0702001 | 1 | 600  | 17 | 0.00873925 |
| 0.108813  | 1 | 931  | 26 | 0.00840381 |
| 0.0957647 | 1 | 814  | 23 | 0.00745043 |
| 0.0745882 | 1 | 634  | 18 | 0.00595858 |
| 0.0709412 | 1 | 603  | 15 | 0.00941014 |
| 0.110706  | 1 | 941  | 25 | 0.00861567 |
| 0.072016  | 1 | 613  | 15 | 0.00949842 |
| 0.0742353 | 1 | 631  | 15 | 0.00794477 |
| 0.117861  | 1 | 1005 | 27 | 0.00558783 |
| 0.0528041 | 1 | 596  | 16 | 0.00899525 |
| 0.0549618 | 1 | 468  | 13 | 0.00700906 |
| 0.0404706 | 1 | 344  | 10 | 0.00998393 |
| 0.0694118 | 1 | 590  | 16 | 0.00928656 |
| 0.0654032 | 1 | 635  | 13 | 0.00798891 |
| 0.0798824 | 1 | 679  | 15 | 0.00827139 |
| 0.0641509 | 1 | 629  | 18 | 0.00997511 |

|           |          |      |    |            |
|-----------|----------|------|----|------------|
| 0.0630291 | 1        | 618  | 16 | 0.00805071 |
| 0.201647  | 1        | 1714 | 48 | 0.0074063  |
| 0.0558824 | 1        | 475  | 12 | 0.00852739 |
| 0.0891496 | 1        | 760  | 20 | 0.00833319 |
| 0.0608388 | 1        | 602  | 11 | 0.00937483 |
| 0.0903226 | 1        | 770  | 21 | 0.00774174 |
| 0.0708235 | 1        | 602  | 17 | 0.00763581 |
| 0.0405424 | 1        | 595  | 16 | 0.00826257 |
| 0.0909412 | 1        | 773  | 21 | 0.00758285 |
| 0.0722353 | 1        | 614  | 17 | 0.0086245  |
| 0.0791013 | 1        | 676  | 18 | 0.00666478 |
| 0.0758824 | 1        | 645  | 16 | 0.00804188 |
| 0.0721176 | 1        | 613  | 17 | 0.00995745 |
| 0.0452151 | 1        | 618  | 11 | 0.00466094 |
| 0.0492264 | 1        | 420  | 12 | 0.00661182 |
| 0.0716708 | 1        | 613  | 17 | 0.00798891 |
| 0.0703529 | 1        | 598  | 17 | 0.00932187 |
| 0.0814118 | 1        | 692  | 19 | 0.00505817 |
| 0.0574118 | 1        | 488  | 14 | 0.00867746 |
| 0.0825688 | 1        | 702  | 15 | 0.00520824 |
| 0.118118  | 1        | 1004 | 28 | 0.00838615 |
| 0.076     | 1        | 646  | 18 | 0.00692961 |
| 0.0892941 | 1        | 759  | 21 | 0.00804188 |
| 0.0683208 | 1        | 581  | 14 | 0.00636465 |
| 0.0685569 | 1        | 943  | 26 | 0.00601155 |
| 0.0651765 | 1        | 554  | 16 | 0.00972794 |
| 0.0895627 | 1        | 768  | 21 | 0.00622341 |
| 0.0500106 | 1        | 706  | 15 | 0.00587913 |
| 0.0715294 | 1        | 608  | 17 | 0.00903056 |
| 0.0118824 | 0.162903 | 620  | 18 | 0.0095249  |
| 0.0723529 | 1        | 615  | 17 | 0.00988683 |
| 0.0590588 | 0.714082 | 703  | 19 | 0.00794477 |
| 0.0827059 | 1        | 703  | 19 | 0.00794477 |
| 0.0656471 | 1        | 558  | 15 | 0.00568493 |
| 0.0643211 | 1        | 585  | 15 | 0.00998393 |
| 0.0885882 | 1        | 753  | 21 | 0.00553486 |
| 0.0785882 | 1        | 668  | 18 | 0.00833319 |
| 0.0605882 | 1        | 515  | 14 | 0.00876573 |
| 0.047609  | 1        | 676  | 19 | 0.00411363 |
| 0.0615222 | 0.773669 | 676  | 19 | 0.00411363 |
| 0.119112  | 1        | 1014 | 26 | 0.00798008 |
| 0.0293344 | 1        | 357  | 10 | 0.00822726 |
| 0.0857647 | 1        | 729  | 21 | 0.00480217 |
| 0.0764953 | 1        | 729  | 21 | 0.00480217 |
| 0.082454  | 1        | 797  | 20 | 0.00783002 |
| 0.0822667 | 1        | 797  | 20 | 0.00783002 |
| 0.0660046 | 1        | 638  | 18 | 0.00860684 |

|           |          |      |    |            |
|-----------|----------|------|----|------------|
| 0.0658547 | 1        | 638  | 18 | 0.00860684 |
| 0.0682353 | 1        | 580  | 17 | 0.00792712 |
| 0.0967064 | 1        | 828  | 19 | 0.00882753 |
| 0.0694118 | 1        | 590  | 17 | 0.00765347 |
| 0.0712046 | 1        | 613  | 18 | 0.00979856 |
| 0.082     | 1        | 697  | 19 | 0.00464328 |
| 0.0597578 | 1        | 602  | 17 | 0.0089776  |
| 0.0881662 | 1        | 751  | 18 | 0.00721209 |
| 0.096     | 1        | 816  | 23 | 0.00757402 |
| 0.0486117 | 1        | 625  | 18 | 0.00798891 |
| 0.0746689 | 1        | 637  | 18 | 0.00527003 |
| 0.0354274 | 1        | 591  | 17 | 0.00890698 |
| 0.0407026 | 1        | 679  | 19 | 0.00780354 |
| 0.0808556 | 1        | 688  | 20 | 0.00478452 |
| 0.0736225 | 1        | 628  | 16 | 0.00931304 |
| 0.0998029 | 1        | 861  | 22 | 0.0063823  |
| 0.0708037 | 1        | 607  | 16 | 0.00909235 |
| 0.109765  | 1        | 933  | 26 | 0.00887167 |
| 0.112203  | 1        | 959  | 26 | 0.0056761  |
| 0.0795626 | 1        | 684  | 19 | 0.00842146 |
| 0.0714118 | 1        | 607  | 17 | 0.00969263 |
| 0.0647819 | 1        | 1093 | 31 | 0.00729154 |
| 0.03977   | 1        | 671  | 19 | 0.00513762 |
| 0.0639813 | 1        | 548  | 15 | 0.00869511 |
| 0.0568797 | 1        | 778  | 21 | 0.00661182 |
| 0.0837369 | 1        | 778  | 21 | 0.00661182 |
| 0.0732215 | 1        | 633  | 18 | 0.00783002 |
| 0.0692891 | 1        | 694  | 20 | 0.00737981 |
| 0.0877974 | 1        | 749  | 20 | 0.00678837 |
| 0.0824706 | 1        | 701  | 20 | 0.0073445  |
| 0.0723529 | 1        | 615  | 15 | 0.00965731 |
| 0.0463111 | 1        | 784  | 22 | 0.00470507 |
| 0.0716471 | 1        | 609  | 16 | 0.00892463 |
| 0.0375706 | 1        | 605  | 17 | 0.00982504 |
| 0.0375706 | 1        | 605  | 14 | 0.00990449 |
| 0.0770858 | 1        | 656  | 19 | 0.00926008 |
| 0.0412117 | 1        | 351  | 10 | 0.00860684 |
| 0.0454273 | 1        | 607  | 17 | 0.00826257 |
| 0.0689381 | 1        | 607  | 14 | 0.00787415 |
| 0.0496874 | 1        | 612  | 14 | 0.00762698 |
| 0.0809412 | 1        | 688  | 13 | 0.0076005  |
| 0.0402353 | 1        | 342  | 10 | 0.00944545 |
| 0.0693954 | 1        | 590  | 17 | 0.00735333 |
| 0.0490403 | 1        | 419  | 12 | 0.00946311 |
| 0.0730588 | 0.998392 | 622  | 18 | 0.00808601 |
| 0.0358919 | 1        | 599  | 17 | 0.00680602 |
| 0.0711179 | 1        | 605  | 17 | 0.00918946 |



|           |   |      |    |            |
|-----------|---|------|----|------------|
| 0.101563  | 1 | 864  | 24 | 0.00738864 |
| 0.0714118 | 1 | 607  | 17 | 0.00700906 |
| 0.0977647 | 1 | 831  | 20 | 0.00798891 |
| 0.036246  | 1 | 728  | 16 | 0.0082096  |
| 0.0400797 | 1 | 805  | 22 | 0.00565844 |
| 0.0307194 | 1 | 617  | 18 | 0.00988683 |
| 0.0261326 | 1 | 383  | 11 | 0.00906587 |
| 0.0667564 | 1 | 645  | 18 | 0.0060292  |
| 0.0921745 | 1 | 788  | 22 | 0.00547307 |
| 0.0758824 | 1 | 645  | 13 | 0.00767112 |
| 0.0698232 | 1 | 612  | 17 | 0.00814781 |
| 0.0919892 | 1 | 782  | 22 | 0.00834201 |
| 0.0711744 | 1 | 620  | 17 | 0.00863332 |
| 0.0704094 | 1 | 602  | 17 | 0.00858918 |
| 0.0703529 | 1 | 598  | 17 | 0.00863332 |
| 0.085085  | 1 | 846  | 22 | 0.00820077 |
| 0.0511325 | 1 | 605  | 16 | 0.00867746 |
| 0.0718824 | 1 | 611  | 11 | 0.00682368 |
| 0.0704661 | 1 | 638  | 18 | 0.00758285 |
| 0.0576557 | 1 | 636  | 18 | 0.00749457 |
| 0.088     | 1 | 748  | 21 | 0.00676189 |
| 0.0545555 | 1 | 591  | 16 | 0.00840381 |
| 0.0697647 | 1 | 593  | 15 | 0.00715913 |
| 0.0595799 | 1 | 607  | 17 | 0.00980738 |
| 0.0742151 | 1 | 643  | 18 | 0.00619692 |
| 0.0783272 | 1 | 678  | 19 | 0.0067354  |
| 0.0582353 | 1 | 495  | 14 | 0.00996628 |
| 0.0634995 | 1 | 540  | 15 | 0.00815664 |
| 0.0671765 | 1 | 571  | 13 | 0.00918946 |
| 0.071262  | 1 | 611  | 17 | 0.00989566 |
| 0.0767786 | 1 | 654  | 18 | 0.00744161 |
| 0.0725882 | 1 | 617  | 17 | 0.00860684 |
| 0.0724774 | 1 | 617  | 17 | 0.00860684 |
| 0.069293  | 1 | 591  | 17 | 0.00903056 |
| 0.0795304 | 1 | 718  | 19 | 0.00636465 |
| 0.108297  | 1 | 1039 | 29 | 0.00821843 |
| 0.21      | 1 | 1785 | 50 | 0.00908353 |
| 0.0274779 | 1 | 588  | 10 | 0.00929539 |
| 0.0811281 | 1 | 699  | 20 | 0.00668244 |
| 0.0802353 | 1 | 682  | 13 | 0.00759167 |
| 0.0508915 | 1 | 862  | 24 | 0.00752988 |
| 0.132588  | 1 | 1127 | 31 | 0.00712381 |
| 0.0788923 | 1 | 678  | 19 | 0.0074063  |
| 0.122588  | 1 | 1042 | 25 | 0.00468742 |
| 0.0752941 | 1 | 640  | 15 | 0.00984269 |
| 0.0435501 | 1 | 501  | 14 | 0.00838615 |
| 0.0589412 | 1 | 501  | 14 | 0.00838615 |

|           |   |      |    |            |
|-----------|---|------|----|------------|
| 0.108982  | 1 | 927  | 25 | 0.00723857 |
| 0.0694118 | 1 | 590  | 12 | 0.0076005  |
| 0.111059  | 1 | 944  | 26 | 0.00744161 |
| 0.101647  | 1 | 864  | 24 | 0.00880987 |
| 0.0986977 | 1 | 864  | 24 | 0.00880987 |
| 0.0399003 | 1 | 704  | 20 | 0.00648823 |
| 0.0716471 | 1 | 609  | 17 | 0.00837732 |
| 0.0790523 | 1 | 674  | 19 | 0.00863332 |
| 0.0402185 | 1 | 346  | 10 | 0.00955139 |
| 0.0986474 | 1 | 846  | 23 | 0.00763581 |
| 0.0614354 | 1 | 523  | 14 | 0.00557017 |
| 0.0704706 | 1 | 599  | 17 | 0.00827139 |
| 0.0895294 | 1 | 761  | 21 | 0.00855387 |
| 0.0688235 | 1 | 585  | 17 | 0.00835967 |
| 0.0378626 | 1 | 834  | 19 | 0.00505817 |
| 0.0872941 | 1 | 742  | 21 | 0.00775057 |
| 0.0704706 | 1 | 599  | 12 | 0.00847443 |
| 0.105895  | 1 | 909  | 25 | 0.00515528 |
| 0.0779859 | 1 | 666  | 19 | 0.00877456 |
| 0.0725995 | 1 | 620  | 10 | 0.00948077 |
| 0.0804759 | 1 | 690  | 18 | 0.00843912 |
| 0.0851913 | 1 | 726  | 20 | 0.00799774 |
| 0.0838824 | 1 | 713  | 19 | 0.00971911 |
| 0.07      | 1 | 595  | 10 | 0.00521707 |
| 0.115178  | 1 | 985  | 26 | 0.00898642 |
| 0.125765  | 1 | 1069 | 30 | 0.00738864 |
| 0.173391  | 1 | 1474 | 37 | 0.00855387 |
| 0.0698824 | 1 | 594  | 17 | 0.00632051 |
| 0.0522827 | 1 | 631  | 18 | 0.00808601 |
| 0.0311542 | 1 | 376  | 10 | 0.00684133 |
| 0.0776266 | 1 | 662  | 19 | 0.00835967 |
| 0.0702898 | 1 | 604  | 17 | 0.00850974 |
| 0.0970089 | 1 | 840  | 24 | 0.0071503  |
| 0.0838824 | 1 | 713  | 20 | 0.0061881  |
| 0.0978733 | 1 | 833  | 24 | 0.005067   |
| 0.0623529 | 1 | 530  | 13 | 0.0078565  |
| 0.0743529 | 1 | 632  | 18 | 0.00545541 |
| 0.0810937 | 1 | 694  | 20 | 0.00861567 |
| 0.0714118 | 1 | 607  | 12 | 0.00918946 |
| 0.0656643 | 1 | 559  | 14 | 0.00551721 |
| 0.0746753 | 1 | 644  | 11 | 0.00762698 |
| 0.0468781 | 1 | 702  | 20 | 0.00698257 |
| 0.0821341 | 1 | 702  | 20 | 0.00698257 |
| 0.0676941 | 1 | 593  | 17 | 0.0069914  |
| 0.0558824 | 1 | 475  | 13 | 0.00822726 |
| 0.0445562 | 1 | 381  | 11 | 0.00745043 |
| 0.0878929 | 1 | 755  | 21 | 0.00840381 |

|           |          |      |    |            |
|-----------|----------|------|----|------------|
| 0.0672479 | 1        | 671  | 19 | 0.00873925 |
| 0.0705882 | 1        | 600  | 11 | 0.00549072 |
| 0.0917647 | 1        | 780  | 19 | 0.00868629 |
| 0.0715275 | 1        | 620  | 18 | 0.00984269 |
| 0.0688567 | 1        | 589  | 17 | 0.00926008 |
| 0.0649139 | 1        | 637  | 18 | 0.00633817 |
| 0.0749472 | 1        | 639  | 17 | 0.00774174 |
| 0.0749912 | 1        | 639  | 17 | 0.00774174 |
| 0.0932442 | 1        | 795  | 19 | 0.00831553 |
| 0.0932989 | 1        | 795  | 19 | 0.00831553 |
| 0.0812477 | 1        | 870  | 25 | 0.00462562 |
| 0.0445909 | 1        | 582  | 17 | 0.00838615 |
| 0.0684706 | 1        | 582  | 17 | 0.00838615 |
| 0.0587411 | 1        | 629  | 18 | 0.00639996 |
| 0.100941  | 1        | 858  | 23 | 0.00594975 |
| 0.0748235 | 1        | 636  | 17 | 0.00611748 |
| 0.0747059 | 1        | 635  | 16 | 0.00827139 |
| 0.0819229 | 1        | 697  | 20 | 0.00726506 |
| 0.0415846 | 0.515065 | 697  | 20 | 0.00726506 |
| 0.0810588 | 1        | 689  | 19 | 0.00980738 |
| 0.0958824 | 1        | 815  | 23 | 0.00719444 |
| 0.0355843 | 1        | 606  | 17 | 0.00944545 |
| 0.0664553 | 1        | 566  | 12 | 0.00873042 |
| 0.0546969 | 1        | 683  | 12 | 0.00851857 |
| 0.0637463 | 1        | 796  | 22 | 0.00800657 |
| 0.0819844 | 1        | 704  | 19 | 0.00684133 |
| 0.0684756 | 1        | 588  | 12 | 0.00623224 |
| 0.0732864 | 1        | 1082 | 30 | 0.00765347 |
| 0.0825667 | 1        | 709  | 20 | 0.00828022 |
| 0.0731509 | 1        | 1080 | 31 | 0.00896877 |
| 0.0403685 | 1        | 596  | 16 | 0.00865981 |
| 0.0998823 | 1        | 849  | 24 | 0.00855387 |
| 0.0316302 | 1        | 832  | 23 | 0.00926008 |
| 0.0903317 | 1        | 768  | 21 | 0.00752105 |
| 0.0765882 | 1        | 651  | 17 | 0.00875691 |
| 0.106062  | 1        | 1027 | 29 | 0.00546424 |
| 0.0842218 | 1        | 1027 | 29 | 0.00546424 |
| 0.0371669 | 1        | 615  | 13 | 0.00800657 |
| 0.0689078 | 1        | 617  | 14 | 0.00899525 |
| 0.0725882 | 1        | 617  | 14 | 0.00899525 |
| 0.0766138 | 1        | 686  | 19 | 0.00676189 |
| 0.0341619 | 1        | 826  | 21 | 0.00585265 |
| 0.0281649 | 1        | 681  | 18 | 0.00998393 |
| 0.076     | 1        | 646  | 17 | 0.00745926 |
| 0.0726717 | 1        | 618  | 12 | 0.00659416 |
| 0.0443529 | 1        | 377  | 10 | 0.00975442 |
| 0.0788235 | 1        | 670  | 17 | 0.00647058 |

|           |          |      |    |            |
|-----------|----------|------|----|------------|
| 0.072991  | 0.728121 | 857  | 24 | 0.00519941 |
| 0.0743343 | 1        | 857  | 24 | 0.00519941 |
| 0.0657647 | 1        | 559  | 10 | 0.00838615 |
| 0.0815421 | 1        | 698  | 20 | 0.00671775 |
| 0.0694836 | 1        | 592  | 17 | 0.00989566 |
| 0.0682179 | 1        | 859  | 24 | 0.00517293 |
| 0.0635822 | 1        | 907  | 26 | 0.00495224 |
| 0.0411497 | 1        | 587  | 17 | 0.00804188 |
| 0.0437648 | 1        | 737  | 19 | 0.00752105 |
| 0.114     | 1        | 969  | 23 | 0.00659416 |
| 0.0731822 | 1        | 623  | 18 | 0.00780354 |
| 0.0721759 | 1        | 614  | 17 | 0.00837732 |
| 0.0754608 | 1        | 655  | 19 | 0.00534065 |
| 0.0449547 | 1        | 601  | 17 | 0.00762698 |
| 0.0536315 | 1        | 717  | 21 | 0.00910118 |
| 0.0399813 | 1        | 342  | 10 | 0.00970145 |
| 0.101964  | 1        | 893  | 24 | 0.00775057 |
| 0.0637562 | 1        | 682  | 19 | 0.00562313 |
| 0.0728235 | 1        | 619  | 17 | 0.00822726 |
| 0.0198694 | 1        | 630  | 16 | 0.00826257 |
| 0.0689504 | 1        | 630  | 16 | 0.00826257 |
| 0.0221087 | 1        | 701  | 20 | 0.00877456 |
| 0.0189233 | 1        | 600  | 17 | 0.00685899 |
| 0.067008  | 1        | 589  | 17 | 0.00989566 |
| 0.029853  | 1        | 603  | 14 | 0.00936601 |
| 0.0829412 | 1        | 705  | 16 | 0.00584382 |
| 0.0593819 | 1        | 538  | 13 | 0.00843029 |
| 0.026584  | 1        | 819  | 20 | 0.00683251 |
| 0.0809262 | 1        | 692  | 12 | 0.00640879 |
| 0.0661176 | 1        | 562  | 16 | 0.00896877 |
| 0.0664481 | 1        | 608  | 17 | 0.0092689  |
| 0.0808235 | 1        | 687  | 18 | 0.0070532  |
| 0.0870076 | 1        | 740  | 21 | 0.00821843 |
| 0.0831081 | 1        | 738  | 21 | 0.00646175 |
| 0.0603    | 1        | 603  | 10 | 0.00923359 |
| 0.0761278 | 1        | 648  | 16 | 0.0064441  |
| 0.0730133 | 1        | 622  | 17 | 0.0071503  |
| 0.0721176 | 1        | 613  | 17 | 0.00681485 |
| 0.0730002 | 1        | 637  | 17 | 0.00726506 |
| 0.0704706 | 1        | 599  | 17 | 0.00745043 |
| 0.0949188 | 1        | 807  | 23 | 0.00543776 |
| 0.0829412 | 1        | 705  | 19 | 0.00674423 |
| 0.0781176 | 1        | 664  | 19 | 0.00821843 |
| 0.0711179 | 1        | 605  | 17 | 0.00903056 |
| 0.123019  | 1        | 1048 | 29 | 0.00611748 |
| 0.100764  | 1        | 857  | 23 | 0.00736216 |
| 0.0406045 | 0.48853  | 1177 | 31 | 0.00784767 |

|           |          |      |    |            |
|-----------|----------|------|----|------------|
| 0.0887059 | 1        | 754  | 17 | 0.00868629 |
| 0.0724706 | 1        | 616  | 14 | 0.00711499 |
| 0.0712941 | 1        | 606  | 17 | 0.00767995 |
| 0.0420079 | 1        | 677  | 19 | 0.00697375 |
| 0.0725882 | 1        | 617  | 15 | 0.00867746 |
| 0.0764436 | 1        | 650  | 18 | 0.00815664 |
| 0.086019  | 1        | 734  | 20 | 0.00517293 |
| 0.074     | 1        | 629  | 17 | 0.00435197 |
| 0.0305677 | 1        | 595  | 17 | 0.0085627  |
| 0.07      | 1        | 595  | 17 | 0.0085627  |
| 0.0360647 | 1        | 702  | 20 | 0.00918946 |
| 0.059797  | 1        | 654  | 11 | 0.00712381 |
| 0.0726704 | 1        | 627  | 17 | 0.00873925 |
| 0.136118  | 1        | 1157 | 26 | 0.00793595 |
| 0.0741176 | 1        | 630  | 18 | 0.00845677 |
| 0.0603524 | 1        | 620  | 18 | 0.00466094 |
| 0.0720093 | 1        | 620  | 18 | 0.00466094 |
| 0.0268459 | 1        | 609  | 10 | 0.00766229 |
| 0.109646  | 1        | 956  | 26 | 0.00514645 |
| 0.072453  | 1        | 682  | 19 | 0.0061881  |
| 0.0968235 | 0.998786 | 824  | 23 | 0.00658534 |
| 0.0969412 | 1        | 824  | 23 | 0.00658534 |
| 0.0736842 | 1        | 630  | 17 | 0.00752988 |
| 0.0721176 | 1        | 613  | 18 | 0.00648823 |
| 0.0407947 | 1        | 347  | 10 | 0.00884518 |
| 0.0696856 | 1        | 594  | 14 | 0.00491693 |
| 0.0384468 | 1        | 600  | 17 | 0.00847443 |
| 0.069979  | 1        | 600  | 17 | 0.00847443 |
| 0.118261  | 1        | 1009 | 23 | 0.00928656 |
| 0.0697647 | 1        | 593  | 17 | 0.00873925 |
| 0.108353  | 1        | 921  | 26 | 0.00813015 |
| 0.0515294 | 1        | 438  | 12 | 0.00789181 |
| 0.0703529 | 1        | 598  | 16 | 0.0057732  |
| 0.0971765 | 1        | 826  | 18 | 0.0063823  |
| 0.0715294 | 1        | 608  | 18 | 0.00921594 |
| 0.119529  | 1        | 1016 | 28 | 0.00826257 |
| 0.07      | 1        | 595  | 16 | 0.00850974 |
| 0.0845882 | 1        | 719  | 16 | 0.00841263 |
| 0.0722764 | 1        | 615  | 17 | 0.00934835 |
| 0.0707059 | 1        | 601  | 10 | 0.00678837 |
| 0.119127  | 1        | 1042 | 27 | 0.00806836 |
| 0.0358682 | 1        | 591  | 12 | 0.00700906 |
| 0.0681176 | 0.983022 | 589  | 17 | 0.00799774 |
| 0.0696471 | 1        | 592  | 16 | 0.00596741 |
| 0.0738747 | 1        | 645  | 13 | 0.00873042 |
| 0.0701775 | 1        | 597  | 14 | 0.00900408 |
| 0.0686365 | 1        | 597  | 14 | 0.00900408 |

|           |   |      |    |            |
|-----------|---|------|----|------------|
| 0.0547059 | 1 | 465  | 11 | 0.00848325 |
| 0.0703529 | 1 | 598  | 12 | 0.00935718 |
| 0.0694136 | 1 | 593  | 13 | 0.00888049 |
| 0.0891765 | 1 | 758  | 20 | 0.00842146 |
| 0.0690687 | 1 | 600  | 17 | 0.00722092 |
| 0.12018   | 1 | 1044 | 29 | 0.00561431 |
| 0.0697647 | 1 | 593  | 14 | 0.0079536  |
| 0.0925038 | 1 | 791  | 22 | 0.00861567 |
| 0.0688808 | 1 | 589  | 17 | 0.00847443 |
| 0.0815421 | 1 | 698  | 19 | 0.00550838 |
| 0.0665036 | 1 | 571  | 10 | 0.00883636 |
| 0.0755582 | 1 | 643  | 18 | 0.00636465 |
| 0.0842338 | 1 | 725  | 20 | 0.00749457 |
| 0.058     | 1 | 493  | 14 | 0.00814781 |
| 0.0832941 | 1 | 708  | 20 | 0.00886284 |
| 0.0697019 | 1 | 594  | 17 | 0.00868629 |
| 0.0664207 | 1 | 630  | 14 | 0.00867746 |
| 0.0490588 | 1 | 417  | 12 | 0.00662947 |
| 0.0753465 | 1 | 647  | 12 | 0.00466094 |
| 0.0721176 | 1 | 613  | 17 | 0.00774174 |
| 0.0873022 | 1 | 1054 | 30 | 0.00805071 |
| 0.0554129 | 1 | 669  | 19 | 0.00790946 |
| 0.114706  | 1 | 975  | 24 | 0.00572024 |
| 0.0972548 | 1 | 829  | 23 | 0.00838615 |
| 0.0741176 | 1 | 630  | 18 | 0.0077594  |
| 0.0695294 | 1 | 591  | 14 | 0.00898642 |
| 0.0727059 | 1 | 618  | 17 | 0.00501404 |
| 0.111225  | 1 | 974  | 27 | 0.00575555 |
| 0.0453017 | 1 | 714  | 20 | 0.00669127 |
| 0.0809412 | 1 | 688  | 13 | 0.00767112 |
| 0.0673298 | 1 | 616  | 17 | 0.00827139 |
| 0.0991415 | 1 | 843  | 24 | 0.00886284 |
| 0.0528976 | 1 | 450  | 13 | 0.00719444 |
| 0.103294  | 1 | 878  | 24 | 0.00694727 |
| 0.0717647 | 1 | 610  | 17 | 0.00986035 |
| 0.095498  | 1 | 840  | 23 | 0.00868629 |
| 0.0701176 | 1 | 596  | 12 | 0.00665596 |
| 0.0828235 | 1 | 704  | 15 | 0.00721209 |
| 0.0695294 | 1 | 591  | 16 | 0.00710616 |
| 0.0923529 | 1 | 785  | 22 | 0.00894229 |
| 0.0756471 | 1 | 643  | 17 | 0.00770643 |
| 0.110813  | 1 | 950  | 18 | 0.00493459 |
| 0.108706  | 1 | 924  | 26 | 0.00564079 |
| 0.0447206 | 1 | 673  | 19 | 0.00530534 |
| 0.0481542 | 1 | 587  | 17 | 0.00939249 |
| 0.0304583 | 1 | 636  | 18 | 0.00822726 |
| 0.07      | 1 | 595  | 17 | 0.00988683 |

|           |          |      |    |            |
|-----------|----------|------|----|------------|
| 0.0691741 | 1        | 686  | 15 | 0.00519941 |
| 0.116467  | 1        | 1155 | 32 | 0.00793595 |
| 0.0702353 | 1        | 597  | 17 | 0.00763581 |
| 0.0751765 | 1        | 639  | 18 | 0.00752105 |
| 0.0782353 | 1        | 665  | 12 | 0.00929539 |
| 0.110569  | 1        | 952  | 20 | 0.00682368 |
| 0.0714537 | 1        | 609  | 15 | 0.00918063 |
| 0.0814267 | 1        | 694  | 20 | 0.0060292  |
| 0.0771036 | 1        | 657  | 13 | 0.00752988 |
| 0.0240554 | 0.312024 | 657  | 13 | 0.00752988 |
| 0.0555294 | 1        | 472  | 13 | 0.00977207 |
| 0.0715368 | 1        | 614  | 15 | 0.00883636 |
| 0.080086  | 1        | 968  | 26 | 0.00895111 |
| 0.0984706 | 1        | 837  | 24 | 0.00928656 |
| 0.0788235 | 1        | 670  | 16 | 0.00792712 |
| 0.0788235 | 1        | 670  | 16 | 0.00792712 |
| 0.069541  | 1        | 600  | 17 | 0.00655003 |
| 0.0792941 | 1        | 674  | 19 | 0.00719444 |
| 0.0376095 | 1        | 601  | 17 | 0.00767112 |
| 0.0365457 | 1        | 584  | 17 | 0.00825374 |
| 0.104588  | 1        | 889  | 25 | 0.0085627  |
| 0.100235  | 1        | 853  | 24 | 0.00713264 |
| 0.0361522 | 1        | 457  | 13 | 0.00781236 |
| 0.0805307 | 1        | 692  | 18 | 0.00780354 |
| 0.0799202 | 1        | 681  | 14 | 0.00678837 |
| 0.0728806 | 1        | 674  | 19 | 0.00867746 |
| 0.0694754 | 1        | 592  | 17 | 0.00749457 |
| 0.0844988 | 1        | 719  | 20 | 0.00727388 |
| 0.0668628 | 1        | 591  | 16 | 0.00682368 |
| 0.0667496 | 1        | 590  | 17 | 0.00840381 |
| 0.0943065 | 1        | 805  | 23 | 0.00586148 |
| 0.0802102 | 1        | 687  | 20 | 0.00729154 |
| 0.0661954 | 1        | 590  | 12 | 0.00712381 |
| 0.0999298 | 1        | 854  | 17 | 0.00700906 |
| 0.0815586 | 1        | 697  | 20 | 0.00661182 |
| 0.0652625 | 1        | 1540 | 42 | 0.00611748 |
| 0.0705924 | 1        | 603  | 17 | 0.00876573 |
| 0.0707059 | 1        | 601  | 17 | 0.00845677 |
| 0.0792941 | 1        | 674  | 19 | 0.00821843 |
| 0.0763881 | 1        | 659  | 17 | 0.00730919 |
| 0.0767529 | 1        | 659  | 17 | 0.00730919 |
| 0.0715294 | 1        | 608  | 15 | 0.00929539 |
| 0.0626322 | 1        | 533  | 11 | 0.00980738 |
| 0.050339  | 1        | 438  | 13 | 0.00794477 |
| 0.0849819 | 1        | 726  | 19 | 0.00481983 |
| 0.0563472 | 1        | 692  | 19 | 0.00758285 |
| 0.0496702 | 1        | 610  | 17 | 0.00964849 |

|           |   |      |    |            |
|-----------|---|------|----|------------|
| 0.0530506 | 1 | 713  | 20 | 0.00731802 |
| 0.0684114 | 1 | 596  | 17 | 0.00994862 |
| 0.0385254 | 1 | 603  | 17 | 0.00545541 |
| 0.0788858 | 1 | 1079 | 30 | 0.00619692 |
| 0.158507  | 1 | 1350 | 37 | 0.00784767 |
| 0.0779709 | 1 | 664  | 19 | 0.00825374 |
| 0.0386446 | 1 | 609  | 17 | 0.00765347 |
| 0.0452238 | 1 | 668  | 18 | 0.00617927 |
| 0.0723159 | 1 | 652  | 19 | 0.00626754 |
| 0.0505751 | 1 | 598  | 17 | 0.00552603 |
| 0.0725882 | 1 | 617  | 13 | 0.00574672 |
| 0.10936   | 1 | 930  | 26 | 0.00466976 |
| 0.0637831 | 1 | 901  | 26 | 0.00800657 |
| 0.0748973 | 1 | 1058 | 24 | 0.00744161 |
| 0.0719953 | 1 | 617  | 17 | 0.00692078 |
| 0.0686781 | 1 | 585  | 13 | 0.00977207 |
| 0.0695294 | 1 | 591  | 15 | 0.00843912 |
| 0.0467209 | 1 | 758  | 19 | 0.00860684 |
| 0.035503  | 1 | 576  | 16 | 0.00971911 |
| 0.0729783 | 1 | 1184 | 33 | 0.00636465 |
| 0.0798824 | 1 | 679  | 19 | 0.00505817 |
| 0.0380864 | 1 | 656  | 18 | 0.00542893 |
| 0.0598484 | 1 | 742  | 21 | 0.00688547 |
| 0.0729412 | 1 | 620  | 15 | 0.00770643 |
| 0.0764706 | 1 | 650  | 17 | 0.00639113 |
| 0.111021  | 1 | 958  | 20 | 0.00622341 |
| 0.0641365 | 1 | 605  | 17 | 0.00774174 |
| 0.0930588 | 1 | 791  | 19 | 0.00700023 |
| 0.0698824 | 1 | 594  | 16 | 0.00992214 |
| 0.115817  | 1 | 990  | 26 | 0.00873042 |
| 0.0710018 | 1 | 606  | 17 | 0.00938366 |
| 0.054698  | 1 | 613  | 17 | 0.00549072 |
| 0.0347692 | 1 | 607  | 17 | 0.00976324 |
| 0.0770308 | 1 | 660  | 17 | 0.00643527 |
| 0.052554  | 1 | 606  | 17 | 0.00716795 |
| 0.0528561 | 1 | 855  | 24 | 0.00674423 |
| 0.0874081 | 1 | 749  | 21 | 0.00527886 |
| 0.0708235 | 1 | 602  | 12 | 0.00918946 |
| 0.103176  | 1 | 877  | 25 | 0.00756519 |
| 0.0189206 | 1 | 386  | 11 | 0.00851857 |
| 0.0360276 | 1 | 735  | 19 | 0.00867746 |
| 0.0292143 | 1 | 596  | 15 | 0.00909235 |
| 0.0323514 | 1 | 660  | 19 | 0.00518176 |
| 0.0720138 | 1 | 624  | 17 | 0.00796243 |
| 0.0736496 | 1 | 649  | 15 | 0.00772409 |
| 0.0653047 | 1 | 569  | 16 | 0.00943663 |
| 0.102651  | 1 | 879  | 23 | 0.00781236 |



|           |   |      |    |            |
|-----------|---|------|----|------------|
| 0.0617647 | 1 | 525  | 15 | 0.00744161 |
| 0.0528681 | 1 | 600  | 17 | 0.00838615 |
| 0.0847059 | 1 | 720  | 20 | 0.00614396 |
| 0.119638  | 1 | 1018 | 29 | 0.00840381 |
| 0.0624934 | 1 | 594  | 14 | 0.00898642 |
| 0.0202084 | 1 | 605  | 11 | 0.00921594 |
| 0.0255528 | 1 | 765  | 22 | 0.00749457 |
| 0.0217449 | 1 | 651  | 19 | 0.00873925 |
| 0.0393639 | 1 | 651  | 19 | 0.00873925 |
| 0.0487675 | 1 | 1460 | 41 | 0.00845677 |
| 0.0882815 | 1 | 1460 | 41 | 0.00845677 |
| 0.0325673 | 1 | 975  | 27 | 0.00820077 |
| 0.0589551 | 1 | 975  | 27 | 0.00820077 |
| 0.0304381 | 1 | 601  | 12 | 0.0066383  |
| 0.0811478 | 1 | 690  | 17 | 0.00539362 |
| 0.0443062 | 1 | 705  | 18 | 0.0063823  |
| 0.036639  | 1 | 583  | 12 | 0.00980738 |
| 0.0727059 | 1 | 618  | 16 | 0.00919828 |
| 0.0727059 | 1 | 618  | 16 | 0.00919828 |
| 0.0696471 | 1 | 592  | 17 | 0.0079536  |
| 0.0299058 | 1 | 600  | 18 | 0.0072474  |
| 0.110824  | 1 | 942  | 24 | 0.00463445 |
| 0.100588  | 1 | 855  | 24 | 0.00765347 |
| 0.0768327 | 1 | 654  | 19 | 0.00646175 |
| 0.0758965 | 1 | 654  | 19 | 0.00646175 |
| 0.0575741 | 1 | 759  | 21 | 0.00565844 |
| 0.101529  | 1 | 863  | 23 | 0.00749457 |
| 0.0722353 | 1 | 614  | 17 | 0.00781236 |
| 0.0764706 | 1 | 650  | 19 | 0.00926008 |
| 0.0721878 | 1 | 618  | 15 | 0.0074063  |
| 0.0721831 | 1 | 615  | 18 | 0.00883636 |
| 0.0735535 | 1 | 628  | 18 | 0.00902173 |
| 0.0893528 | 1 | 856  | 20 | 0.00745043 |
| 0.113839  | 1 | 969  | 24 | 0.00505817 |
| 0.0489412 | 1 | 416  | 10 | 0.00906587 |
| 0.0661113 | 1 | 619  | 14 | 0.00614396 |
| 0.0662181 | 1 | 620  | 12 | 0.00707968 |
| 0.185765  | 1 | 1579 | 44 | 0.00818312 |
| 0.0897647 | 1 | 763  | 21 | 0.00611748 |
| 0.0897647 | 1 | 763  | 21 | 0.00611748 |
| 0.137412  | 1 | 1168 | 31 | 0.00805071 |
| 0.073073  | 1 | 638  | 18 | 0.00598506 |
| 0.0749412 | 1 | 637  | 18 | 0.00544658 |
| 0.0283649 | 1 | 467  | 13 | 0.00813015 |
| 0.0814841 | 1 | 694  | 19 | 0.00617044 |
| 0.0962191 | 1 | 822  | 20 | 0.00622341 |
| 0.101176  | 1 | 860  | 19 | 0.00648823 |

|           |          |      |    |            |
|-----------|----------|------|----|------------|
| 0.0666894 | 1        | 587  | 17 | 0.00956021 |
| 0.0511601 | 1        | 613  | 17 | 0.00840381 |
| 0.0682955 | 1        | 587  | 16 | 0.00770643 |
| 0.0717444 | 1        | 925  | 26 | 0.00828905 |
| 0.0346158 | 0.32     | 925  | 26 | 0.00828905 |
| 0.0713386 | 1        | 623  | 18 | 0.00704437 |
| 0.116111  | 1        | 1014 | 23 | 0.0078565  |
| 0.08153   | 1        | 697  | 15 | 0.00850091 |
| 0.0725231 | 1        | 620  | 14 | 0.00659416 |
| 0.0658791 | 1        | 619  | 18 | 0.00670892 |
| 0.0548084 | 1        | 595  | 17 | 0.00784767 |
| 0.0120803 | 0.31     | 600  | 17 | 0.0092689  |
| 0.0406394 | 1        | 600  | 17 | 0.0092689  |
| 0.0808235 | 1        | 687  | 20 | 0.00409597 |
| 0.0696471 | 1        | 592  | 17 | 0.00840381 |
| 0.12176   | 1        | 1165 | 30 | 0.00719444 |
| 0.0729412 | 1        | 620  | 18 | 0.00723857 |
| 0.0825882 | 1        | 702  | 20 | 0.00459031 |
| 0.0914971 | 1        | 778  | 22 | 0.00868629 |
| 0.0915294 | 1        | 778  | 22 | 0.00868629 |
| 0.123428  | 1        | 1050 | 30 | 0.00845677 |
| 0.0703529 | 1        | 598  | 17 | 0.00980738 |
| 0.0682586 | 1        | 586  | 16 | 0.00868629 |
| 0.168081  | 1        | 1565 | 43 | 0.00617044 |
| 0.0668042 | 1        | 583  | 16 | 0.00845677 |
| 0.0712941 | 1        | 606  | 17 | 0.00922477 |
| 0.105138  | 1        | 929  | 21 | 0.00682368 |
| 0.0372941 | 0.341227 | 929  | 21 | 0.00682368 |
| 0.0697783 | 1        | 598  | 12 | 0.0083067  |
| 0.0735739 | 1        | 632  | 18 | 0.0072474  |
| 0.0700092 | 1        | 606  | 17 | 0.00678837 |
| 0.0777495 | 1        | 673  | 19 | 0.00896877 |
| 0.027292  | 1        | 774  | 22 | 0.00909235 |
| 0.0246827 | 1        | 700  | 20 | 0.0042019  |
| 0.108824  | 1        | 925  | 16 | 0.00754754 |
| 0.0681176 | 1        | 579  | 16 | 0.00975442 |
| 0.0736756 | 1        | 630  | 18 | 0.00738864 |
| 0.107765  | 1        | 916  | 24 | 0.00822726 |
| 0.0808243 | 1        | 706  | 20 | 0.00595858 |
| 0.074411  | 1        | 638  | 18 | 0.00807719 |
| 0.0407062 | 1        | 890  | 25 | 0.00722974 |
| 0.0325192 | 1        | 711  | 20 | 0.00639113 |
| 0.0279455 | 1        | 611  | 17 | 0.00966614 |
| 0.0338456 | 1        | 740  | 21 | 0.00697375 |
| 0.0334048 | 1        | 654  | 18 | 0.00737981 |
| 0.0781176 | 1        | 664  | 19 | 0.00763581 |
| 0.0781176 | 1        | 664  | 19 | 0.00763581 |

|           |          |      |    |            |
|-----------|----------|------|----|------------|
| 0.155882  | 1        | 1325 | 37 | 0.00681485 |
| 0.0565882 | 1        | 481  | 14 | 0.00868629 |
| 0.0740047 | 1        | 632  | 18 | 0.00850974 |
| 0.100152  | 1        | 855  | 24 | 0.0085627  |
| 0.104471  | 1        | 888  | 23 | 0.00440494 |
| 0.104907  | 1        | 898  | 25 | 0.00867746 |
| 0.105647  | 1        | 898  | 25 | 0.00867746 |
| 0.055731  | 1        | 759  | 22 | 0.00691195 |
| 0.0692534 | 1        | 589  | 11 | 0.00703554 |
| 0.0942975 | 1        | 802  | 23 | 0.00816546 |
| 0.129923  | 1        | 1115 | 30 | 0.00838615 |
| 0.0720112 | 1        | 618  | 16 | 0.00976324 |
| 0.0783529 | 1        | 666  | 19 | 0.00619692 |
| 0.0801177 | 1        | 681  | 20 | 0.00849208 |
| 0.0660422 | 1        | 564  | 16 | 0.0076005  |
| 0.0699918 | 1        | 595  | 16 | 0.00852739 |
| 0.0704706 | 1        | 599  | 17 | 0.00888049 |
| 0.097341  | 1        | 831  | 24 | 0.00798891 |
| 0.0619401 | 1        | 643  | 18 | 0.00531417 |
| 0.0913207 | 1        | 948  | 26 | 0.00922477 |
| 0.0422996 | 1        | 646  | 18 | 0.00681485 |
| 0.0359379 | 0.479876 | 646  | 18 | 0.00681485 |
| 0.0632615 | 1        | 675  | 19 | 0.00794477 |
| 0.0694118 | 1        | 590  | 17 | 0.00687664 |
| 0.0794118 | 1        | 675  | 19 | 0.00868629 |
| 0.0921176 | 1        | 783  | 22 | 0.00784767 |
| 0.112824  | 1        | 959  | 27 | 0.00849208 |
| 0.0816279 | 1        | 694  | 20 | 0.00820077 |
| 0.079864  | 1        | 681  | 14 | 0.00617044 |
| 0.0794965 | 1        | 720  | 20 | 0.00919828 |
| 0.0681579 | 1        | 713  | 20 | 0.00557017 |
| 0.0871199 | 1        | 742  | 21 | 0.00788298 |
| 0.111176  | 1        | 945  | 23 | 0.00515528 |
| 0.0885882 | 1        | 753  | 21 | 0.00868629 |
| 0.12927   | 1        | 1105 | 23 | 0.00685899 |
| 0.0446476 | 1        | 586  | 17 | 0.00767112 |
| 0.0787118 | 1        | 677  | 17 | 0.00622341 |
| 0.0795909 | 1        | 677  | 17 | 0.00622341 |
| 0.070868  | 1        | 605  | 17 | 0.00868629 |
| 0.0681538 | 1        | 608  | 17 | 0.00625872 |
| 0.0832257 | 1        | 709  | 20 | 0.00694727 |
| 0.113258  | 1        | 973  | 22 | 0.00775057 |
| 0.0519138 | 1        | 590  | 12 | 0.00963966 |
| 0.0917647 | 1        | 780  | 22 | 0.00849208 |
| 0.042177  | 1        | 365  | 11 | 0.00756519 |
| 0.0717468 | 1        | 612  | 17 | 0.00625872 |
| 0.0696471 | 1        | 592  | 17 | 0.00956021 |

|            |          |      |    |            |
|------------|----------|------|----|------------|
| 0.00702118 | 0.103041 | 592  | 17 | 0.00956021 |
| 0.0687756  | 1        | 587  | 16 | 0.00884518 |
| 0.0445451  | 1        | 757  | 22 | 0.00560548 |
| 0.0719154  | 1        | 612  | 17 | 0.00766229 |
| 0.114276   | 1        | 975  | 23 | 0.00857153 |
| 0.102471   | 1        | 871  | 22 | 0.00871277 |
| 0.0932066  | 1        | 804  | 21 | 0.00766229 |
| 0.116067   | 1        | 1020 | 24 | 0.00611748 |
| 0.0263423  | 1        | 627  | 18 | 0.00849208 |
| 0.0716471  | 1        | 609  | 14 | 0.00865981 |
| 0.0747609  | 1        | 641  | 18 | 0.00843029 |
| 0.0741089  | 1        | 630  | 17 | 0.0060292  |
| 0.0697647  | 1        | 593  | 17 | 0.00850974 |
| 0.0415512  | 1        | 615  | 17 | 0.00694727 |
| 0.0501317  | 1        | 742  | 21 | 0.00603803 |
| 0.0468792  | 1        | 694  | 20 | 0.00911001 |
| 0.0409349  | 1        | 606  | 17 | 0.00932187 |
| 0.0325183  | 1        | 669  | 19 | 0.00882753 |
| 0.0579762  | 1        | 652  | 16 | 0.00887167 |
| 0.0776471  | 1        | 660  | 18 | 0.00799774 |
| 0.0609362  | 1        | 604  | 17 | 0.00641761 |
| 0.0964675  | 1        | 822  | 23 | 0.00622341 |
| 0.0821997  | 1        | 707  | 20 | 0.0073445  |
| 0.051384   | 1        | 659  | 15 | 0.00622341 |
| 0.0478655  | 1        | 407  | 12 | 0.00746809 |
| 0.0870941  | 1        | 743  | 21 | 0.00710616 |
| 0.0723529  | 1        | 615  | 10 | 0.00814781 |
| 0.0843529  | 1        | 717  | 20 | 0.00847443 |
| 0.0774535  | 1        | 674  | 19 | 0.00684133 |
| 0.121671   | 1        | 1037 | 29 | 0.00858918 |
| 0.0887059  | 1        | 754  | 21 | 0.00659416 |
| 0.0702951  | 1        | 598  | 25 | 0.00948077 |
| 0.0704011  | 1        | 602  | 17 | 0.00906587 |
| 0.0925882  | 1        | 787  | 16 | 0.00778588 |
| 0.0727059  | 1        | 618  | 17 | 0.00799774 |
| 0.0944706  | 1        | 803  | 22 | 0.00822726 |
| 0.0749412  | 1        | 637  | 16 | 0.00730919 |
| 0.0562188  | 1        | 744  | 21 | 0.00617927 |
| 0.0872086  | 1        | 752  | 20 | 0.00603803 |
| 0.0708806  | 1        | 619  | 17 | 0.00949842 |
| 0.0712774  | 1        | 606  | 16 | 0.00722974 |
| 0.0843529  | 1        | 717  | 18 | 0.00741512 |
| 0.0560755  | 1        | 671  | 19 | 0.00908353 |
| 0.0666592  | 1        | 598  | 17 | 0.00880104 |
| 0.0806302  | 1        | 696  | 19 | 0.00918946 |
| 0.0708661  | 1        | 603  | 17 | 0.00984269 |
| 0.0634622  | 1        | 540  | 15 | 0.00965731 |

|           |          |      |    |            |
|-----------|----------|------|----|------------|
| 0.0832355 | 1        | 851  | 24 | 0.00444025 |
| 0.0504042 | 1        | 611  | 17 | 0.00855387 |
| 0.131094  | 1        | 1116 | 28 | 0.00619692 |
| 0.0755315 | 1        | 643  | 18 | 0.00642644 |
| 0.0754118 | 1        | 641  | 18 | 0.00946311 |
| 0.0535086 | 1        | 456  | 13 | 0.00826257 |
| 0.0772941 | 1        | 657  | 18 | 0.00876573 |
| 0.0739141 | 0.96347  | 657  | 18 | 0.00876573 |
| 0.121184  | 1        | 1052 | 26 | 0.00868629 |
| 0.0840968 | 1        | 716  | 20 | 0.00560548 |
| 0.0709934 | 1        | 606  | 17 | 0.00570258 |
| 0.12167   | 1        | 1046 | 28 | 0.00896877 |
| 0.0695407 | 1        | 592  | 16 | 0.00851857 |
| 0.0695294 | 1        | 591  | 17 | 0.0096838  |
| 0.0929932 | 1        | 791  | 22 | 0.00591444 |
| 0.0638464 | 1        | 655  | 14 | 0.00919828 |
| 0.133396  | 1        | 1138 | 32 | 0.00421956 |
| 0.118963  | 1        | 1138 | 32 | 0.00421956 |
| 0.069926  | 1        | 595  | 15 | 0.00977207 |
| 0.0444502 | 1        | 686  | 28 | 0.00753871 |
| 0.0682029 | 1        | 589  | 17 | 0.00990449 |
| 0.039714  | 1        | 622  | 18 | 0.00519941 |
| 0.0398094 | 1        | 610  | 17 | 0.0076976  |
| 0.0717647 | 1        | 610  | 17 | 0.0076976  |
| 0.0710588 | 1        | 604  | 17 | 0.00840381 |
| 0.0356777 | 1        | 523  | 15 | 0.00974559 |
| 0.0400372 | 1        | 774  | 22 | 0.00587913 |
| 0.0702353 | 1        | 597  | 17 | 0.00848325 |
| 0.0650701 | 1        | 557  | 11 | 0.00527886 |
| 0.0355679 | 1        | 616  | 16 | 0.00817429 |
| 0.0570996 | 1        | 604  | 17 | 0.0096838  |
| 0.0711765 | 1        | 605  | 17 | 0.00535831 |
| 0.0875088 | 1        | 744  | 21 | 0.00726506 |
| 0.0770767 | 1        | 656  | 17 | 0.004811   |
| 0.0812941 | 1        | 691  | 11 | 0.00722974 |
| 0.076667  | 1        | 691  | 11 | 0.00722974 |
| 0.102235  | 1        | 869  | 24 | 0.00859801 |
| 0.0558083 | 0.578826 | 869  | 24 | 0.00859801 |
| 0.0841056 | 1        | 717  | 20 | 0.00640879 |
| 0.0707059 | 1        | 601  | 17 | 0.00928656 |
| 0.0746944 | 1        | 660  | 19 | 0.00928656 |
| 0.0318185 | 1        | 404  | 10 | 0.00767112 |
| 0.0723274 | 1        | 615  | 12 | 0.00813898 |
| 0.0658605 | 1        | 561  | 10 | 0.00550838 |
| 0.0693069 | 1        | 609  | 15 | 0.00943663 |
| 0.0772969 | 1        | 668  | 19 | 0.00635582 |
| 0.0689331 | 1        | 586  | 17 | 0.00990449 |

|           |          |      |    |            |
|-----------|----------|------|----|------------|
| 0.0702353 | 1        | 597  | 17 | 0.00890698 |
| 0.112247  | 1        | 955  | 26 | 0.00499638 |
| 0.0836471 | 1        | 711  | 20 | 0.00519941 |
| 0.0342829 | 1        | 704  | 19 | 0.00777705 |
| 0.0633326 | 1        | 542  | 16 | 0.00888049 |
| 0.100353  | 1        | 853  | 24 | 0.0085627  |
| 0.0717141 | 1        | 610  | 17 | 0.00986918 |
| 0.108706  | 1        | 924  | 21 | 0.0084656  |
| 0.109529  | 1        | 931  | 26 | 0.00631168 |
| 0.0724706 | 1        | 616  | 15 | 0.00670892 |
| 0.0472682 | 1        | 802  | 23 | 0.00709733 |
| 0.0692849 | 1        | 591  | 17 | 0.00867746 |
| 0.0672306 | 1        | 604  | 16 | 0.00867746 |
| 0.0287609 | 0.709516 | 599  | 17 | 0.00682368 |
| 0.0701775 | 1        | 597  | 17 | 0.00971028 |
| 0.0724706 | 1        | 616  | 18 | 0.00772409 |
| 0.0823529 | 1        | 700  | 18 | 0.00777705 |
| 0.0695294 | 1        | 591  | 17 | 0.00869511 |
| 0.112941  | 1        | 960  | 22 | 0.00715913 |
| 0.0672783 | 1        | 594  | 17 | 0.00988683 |
| 0.0725486 | 1        | 620  | 18 | 0.00545541 |
| 0.0740741 | 1        | 728  | 20 | 0.00590562 |
| 0.0642481 | 1        | 549  | 14 | 0.00871277 |
| 0.0385017 | 1        | 700  | 20 | 0.00744161 |
| 0.0814118 | 1        | 692  | 19 | 0.00519941 |
| 0.0747059 | 1        | 635  | 17 | 0.00692961 |
| 0.0653163 | 1        | 574  | 11 | 0.00678837 |
| 0.129259  | 1        | 1104 | 26 | 0.0070532  |
| 0.0827059 | 1        | 703  | 19 | 0.00789181 |
| 0.0700682 | 1        | 596  | 17 | 0.00781236 |
| 0.106866  | 1        | 909  | 25 | 0.00741512 |
| 0.0621914 | 1        | 529  | 15 | 0.00849208 |
| 0.137765  | 1        | 1171 | 33 | 0.00855387 |
| 0.199529  | 1        | 1696 | 47 | 0.00700023 |
| 0.0413206 | 1        | 602  | 13 | 0.00597624 |
| 0.0528519 | 1        | 770  | 22 | 0.00851857 |
| 0.0680319 | 1        | 588  | 14 | 0.00619692 |
| 0.061437  | 1        | 643  | 18 | 0.00764464 |
| 0.0858824 | 1        | 730  | 18 | 0.00757402 |
| 0.153679  | 1        | 1345 | 38 | 0.00843912 |
| 0.06112   | 1        | 609  | 17 | 0.00677071 |
| 0.0383413 | 1        | 687  | 19 | 0.00412246 |
| 0.0477075 | 1        | 591  | 10 | 0.00996628 |
| 0.0685376 | 1        | 591  | 10 | 0.00996628 |
| 0.0478689 | 1        | 593  | 17 | 0.00665596 |
| 0.0246098 | 0.325581 | 1075 | 30 | 0.00783884 |
| 0.0502283 | 0.532093 | 1075 | 30 | 0.00783884 |

|           |   |      |    |            |
|-----------|---|------|----|------------|
| 0.0428913 | 1 | 610  | 17 | 0.00499638 |
| 0.0535652 | 1 | 610  | 17 | 0.00499638 |
| 0.113059  | 1 | 961  | 26 | 0.00587913 |
| 0.0937647 | 1 | 797  | 21 | 0.00825374 |
| 0.0754673 | 1 | 642  | 18 | 0.00466094 |
| 0.0717647 | 1 | 610  | 13 | 0.00884518 |
| 0.0705993 | 1 | 602  | 17 | 0.00580851 |
| 0.0928826 | 1 | 937  | 26 | 0.00501404 |
| 0.0641356 | 1 | 647  | 18 | 0.00825374 |
| 0.0726782 | 1 | 619  | 14 | 0.00845677 |
| 0.101176  | 1 | 860  | 25 | 0.00585265 |
| 0.0842907 | 1 | 719  | 20 | 0.00821843 |
| 0.073849  | 1 | 632  | 11 | 0.00701788 |
| 0.100094  | 1 | 853  | 24 | 0.00736216 |
| 0.0885319 | 1 | 755  | 19 | 0.00799774 |
| 0.048083  | 1 | 607  | 17 | 0.00668244 |
| 0.09663   | 1 | 843  | 24 | 0.00906587 |
| 0.0731765 | 1 | 622  | 18 | 0.00778588 |
| 0.0717057 | 1 | 610  | 17 | 0.00805953 |
| 0.0648235 | 1 | 551  | 10 | 0.00898642 |
| 0.0914118 | 1 | 777  | 20 | 0.00662065 |
| 0.054     | 1 | 459  | 12 | 0.00761816 |
| 0.0767059 | 1 | 652  | 18 | 0.00779471 |
| 0.058989  | 1 | 713  | 31 | 0.00857153 |
| 0.0704423 | 1 | 602  | 15 | 0.00775057 |
| 0.112147  | 1 | 962  | 26 | 0.00650589 |
| 0.0822353 | 1 | 699  | 19 | 0.00865098 |
| 0.0755294 | 1 | 642  | 13 | 0.00517293 |
| 0.0830588 | 1 | 706  | 20 | 0.00746809 |
| 0.0741176 | 1 | 630  | 18 | 0.00806836 |
| 0.11007   | 1 | 940  | 26 | 0.00736216 |
| 0.072     | 1 | 612  | 15 | 0.00493459 |
| 0.0695734 | 1 | 592  | 16 | 0.00919828 |
| 0.0833529 | 1 | 711  | 16 | 0.00899525 |
| 0.0794118 | 1 | 675  | 19 | 0.00835084 |
| 0.0825882 | 1 | 702  | 20 | 0.00805071 |
| 0.0686217 | 1 | 585  | 14 | 0.00643527 |
| 0.0849945 | 1 | 776  | 17 | 0.0068943  |
| 0.0907708 | 1 | 776  | 17 | 0.0068943  |
| 0.108105  | 1 | 987  | 27 | 0.00515528 |
| 0.086414  | 1 | 741  | 21 | 0.00622341 |
| 0.0696991 | 1 | 593  | 17 | 0.00729154 |
| 0.069464  | 1 | 591  | 17 | 0.00503169 |
| 0.141483  | 1 | 1206 | 32 | 0.00911001 |
| 0.0419721 | 1 | 710  | 17 | 0.00590562 |
| 0.084     | 1 | 714  | 20 | 0.00657651 |
| 0.0756977 | 1 | 651  | 18 | 0.00855387 |

|           |          |      |    |            |
|-----------|----------|------|----|------------|
| 0.0860727 | 1        | 741  | 17 | 0.00731802 |
| 0.134706  | 1        | 1145 | 27 | 0.00778588 |
| 0.0671512 | 1        | 693  | 20 | 0.00849208 |
| 0.137319  | 1        | 1176 | 32 | 0.00838615 |
| 0.0815294 | 1        | 693  | 15 | 0.00648823 |
| 0.0969065 | 1        | 827  | 23 | 0.0054201  |
| 0.0821176 | 1        | 698  | 20 | 0.00587913 |
| 0.070632  | 1        | 608  | 14 | 0.00828022 |
| 0.0796471 | 1        | 677  | 18 | 0.00821843 |
| 0.072605  | 1        | 626  | 18 | 0.00920711 |
| 0.0707059 | 1        | 601  | 17 | 0.00763581 |
| 0.0691765 | 1        | 588  | 14 | 0.00950725 |
| 0.0738916 | 1        | 630  | 15 | 0.00503169 |
| 0.0875058 | 1        | 748  | 20 | 0.00922477 |
| 0.045545  | 1        | 389  | 11 | 0.00826257 |
| 0.0610669 | 1        | 791  | 19 | 0.00692961 |
| 0.0580053 | 1        | 809  | 23 | 0.00838615 |
| 0.0638958 | 1        | 824  | 19 | 0.00844794 |
| 0.0406959 | 1        | 676  | 18 | 0.00819195 |
| 0.0727899 | 1        | 634  | 18 | 0.00789181 |
| 0.0723529 | 1        | 615  | 13 | 0.00949842 |
| 0.0700862 | 1        | 634  | 18 | 0.00549072 |
| 0.096224  | 1        | 818  | 23 | 0.00843912 |
| 0.0770588 | 1        | 655  | 15 | 0.00986035 |
| 0.0662429 | 1        | 594  | 17 | 0.00880104 |
| 0.0716467 | 1        | 610  | 17 | 0.00959552 |
| 0.0738783 | 1        | 629  | 17 | 0.00719444 |
| 0.0705882 | 1        | 600  | 17 | 0.00480217 |
| 0.136941  | 1        | 1164 | 32 | 0.00778588 |
| 0.0725882 | 1        | 617  | 17 | 0.005323   |
| 0.0804271 | 1        | 708  | 17 | 0.00668244 |
| 0.0861176 | 1        | 732  | 21 | 0.00745043 |
| 0.119476  | 1        | 1022 | 29 | 0.00505817 |
| 0.0664881 | 0.922456 | 619  | 14 | 0.00778588 |
| 0.115647  | 1        | 983  | 24 | 0.0067354  |
| 0.0563622 | 1        | 590  | 16 | 0.00976324 |
| 0.0639012 | 1        | 590  | 15 | 0.00977207 |
| 0.0826648 | 1        | 711  | 20 | 0.00527886 |
| 0.0882252 | 1        | 774  | 21 | 0.00866863 |
| 0.0726946 | 1        | 808  | 22 | 0.00920711 |
| 0.0656471 | 1        | 558  | 16 | 0.00746809 |
| 0.0725882 | 1        | 617  | 13 | 0.0063823  |
| 0.0712125 | 1        | 612  | 17 | 0.00895111 |
| 0.0662481 | 1        | 612  | 15 | 0.00849208 |
| 0.077325  | 1        | 666  | 18 | 0.00808601 |
| 0.0697865 | 1        | 595  | 17 | 0.00895994 |
| 0.0761176 | 1        | 647  | 18 | 0.00840381 |



|           |   |      |    |            |
|-----------|---|------|----|------------|
| 0.0533279 | 1 | 649  | 18 | 0.00662065 |
| 0.0974118 | 1 | 828  | 24 | 0.00546424 |
| 0.0807059 | 1 | 686  | 16 | 0.00744161 |
| 0.064528  | 1 | 879  | 25 | 0.00669127 |
| 0.0698824 | 1 | 594  | 17 | 0.00965731 |
| 0.0682943 | 1 | 607  | 17 | 0.00835967 |
| 0.069172  | 1 | 589  | 12 | 0.00798008 |
| 0.0941176 | 1 | 800  | 23 | 0.00849208 |
| 0.0941176 | 1 | 800  | 23 | 0.00849208 |
| 0.0755294 | 1 | 642  | 17 | 0.00558783 |
| 0.0778823 | 1 | 662  | 14 | 0.00685899 |
| 0.100588  | 1 | 855  | 24 | 0.00737981 |
| 0.0785882 | 1 | 668  | 17 | 0.00866863 |
| 0.0709412 | 1 | 603  | 17 | 0.00674423 |
| 0.0712941 | 1 | 606  | 17 | 0.0084656  |
| 0.103206  | 1 | 882  | 25 | 0.00412246 |
| 0.0706834 | 1 | 603  | 17 | 0.00937483 |
| 0.0698824 | 1 | 594  | 17 | 0.00937483 |
| 0.0694656 | 1 | 594  | 17 | 0.00937483 |
| 0.0452941 | 1 | 385  | 11 | 0.00840381 |
| 0.0839605 | 1 | 714  | 20 | 0.0056761  |
| 0.0671059 | 1 | 601  | 17 | 0.00855387 |
| 0.0914386 | 1 | 785  | 22 | 0.00585265 |
| 0.0710032 | 1 | 620  | 17 | 0.00730919 |
| 0.0728064 | 1 | 619  | 18 | 0.00951608 |
| 0.0876471 | 1 | 745  | 21 | 0.00869511 |
| 0.0724392 | 1 | 640  | 18 | 0.00732685 |
| 0.0752941 | 1 | 640  | 18 | 0.00732685 |
| 0.0601657 | 1 | 530  | 11 | 0.00973676 |
| 0.0734298 | 1 | 629  | 18 | 0.00555251 |
| 0.0685908 | 1 | 587  | 16 | 0.00814781 |
| 0.08417   | 1 | 721  | 20 | 0.00910118 |
| 0.186353  | 1 | 1584 | 41 | 0.00781236 |
| 0.0690588 | 1 | 587  | 10 | 0.00972794 |
| 0.0641146 | 1 | 546  | 12 | 0.00972794 |
| 0.0704556 | 1 | 600  | 15 | 0.00929539 |
| 0.0636969 | 1 | 612  | 15 | 0.00697375 |
| 0.0749412 | 1 | 637  | 12 | 0.0068943  |
| 0.0986934 | 1 | 846  | 24 | 0.0060292  |
| 0.0714118 | 1 | 607  | 15 | 0.00941897 |
| 0.0708578 | 1 | 603  | 13 | 0.00558783 |
| 0.0890532 | 1 | 759  | 20 | 0.00843912 |
| 0.0698311 | 1 | 612  | 17 | 0.00765347 |
| 0.0511209 | 1 | 602  | 15 | 0.00837732 |
| 0.0713138 | 1 | 799  | 22 | 0.00763581 |
| 0.0700198 | 1 | 600  | 17 | 0.00928656 |
| 0.116118  | 1 | 987  | 28 | 0.00845677 |

|           |          |      |    |            |
|-----------|----------|------|----|------------|
| 0.0710648 | 1        | 614  | 15 | 0.00894229 |
| 0.0722353 | 1        | 614  | 15 | 0.00894229 |
| 0.0854801 | 0.99455  | 734  | 21 | 0.00718561 |
| 0.0701858 | 1        | 597  | 16 | 0.00590562 |
| 0.103019  | 1        | 877  | 23 | 0.00752105 |
| 0.0783302 | 1        | 668  | 19 | 0.00819195 |
| 0.0446725 | 1        | 605  | 17 | 0.00722974 |
| 0.0731651 | 1        | 632  | 18 | 0.00772409 |
| 0.0104706 | 0.185804 | 479  | 14 | 0.00886284 |
| 0.108353  | 1        | 921  | 19 | 0.00515528 |
| 0.0850079 | 1        | 753  | 19 | 0.00436963 |
| 0.0691765 | 1        | 588  | 17 | 0.00798008 |
| 0.0669451 | 1        | 593  | 14 | 0.00928656 |
| 0.129882  | 1        | 1104 | 31 | 0.00596741 |
| 0.0528235 | 1        | 449  | 13 | 0.00557017 |
| 0.0384122 | 1        | 539  | 15 | 0.00480217 |
| 0.0698862 | 1        | 602  | 17 | 0.00791829 |
| 0.0700749 | 1        | 599  | 17 | 0.00928656 |
| 0.0712123 | 1        | 635  | 17 | 0.00825374 |
| 0.0795294 | 1        | 676  | 18 | 0.0056761  |
| 0.0707059 | 1        | 601  | 17 | 0.00849208 |
| 0.0594882 | 1        | 916  | 26 | 0.00504935 |
| 0.0815294 | 1        | 693  | 19 | 0.00479335 |
| 0.0675446 | 1        | 595  | 17 | 0.00878339 |
| 0.0703205 | 1        | 621  | 15 | 0.00786533 |
| 0.0723529 | 1        | 615  | 17 | 0.00771526 |
| 0.0738824 | 1        | 628  | 18 | 0.00863332 |
| 0.094307  | 1        | 873  | 23 | 0.00553486 |
| 0.068     | 1        | 578  | 16 | 0.00833319 |
| 0.0801267 | 1        | 683  | 19 | 0.00868629 |
| 0.0784706 | 1        | 667  | 19 | 0.00784767 |
| 0.074     | 1        | 629  | 18 | 0.00713264 |
| 0.0729044 | 1        | 621  | 18 | 0.00626754 |
| 0.0320657 | 1        | 726  | 20 | 0.00774174 |
| 0.0356433 | 1        | 807  | 23 | 0.00849208 |
| 0.03635   | 1        | 823  | 23 | 0.00827139 |
| 0.0808235 | 1        | 687  | 14 | 0.00647058 |
| 0.102329  | 1        | 870  | 24 | 0.00609982 |
| 0.102353  | 1        | 870  | 24 | 0.00609982 |
| 0.0767059 | 1        | 652  | 17 | 0.00776822 |
| 0.0735449 | 1        | 628  | 17 | 0.00671775 |
| 0.0678824 | 1        | 577  | 16 | 0.00837732 |
| 0.0314889 | 1        | 696  | 20 | 0.00466094 |
| 0.033932  | 1        | 750  | 21 | 0.00888049 |
| 0.150824  | 1        | 1282 | 35 | 0.00676189 |
| 0.0699859 | 1        | 596  | 12 | 0.00513762 |
| 0.0750793 | 1        | 639  | 18 | 0.0072474  |

|           |   |      |    |            |
|-----------|---|------|----|------------|
| 0.0717924 | 1 | 733  | 21 | 0.00800657 |
| 0.0532606 | 1 | 762  | 21 | 0.00447556 |
| 0.0896365 | 1 | 762  | 21 | 0.00447556 |
| 0.0725626 | 1 | 617  | 10 | 0.00629403 |
| 0.0810144 | 1 | 690  | 20 | 0.0068943  |
| 0.0345293 | 1 | 563  | 10 | 0.00849208 |
| 0.0453858 | 1 | 660  | 14 | 0.00915415 |
| 0.0894964 | 1 | 766  | 16 | 0.00712381 |
| 0.0790588 | 1 | 672  | 19 | 0.00683251 |
| 0.0485882 | 1 | 413  | 11 | 0.00973676 |
| 0.0714118 | 1 | 607  | 18 | 0.00889815 |
| 0.0717647 | 1 | 610  | 12 | 0.00895111 |
| 0.0745923 | 1 | 709  | 18 | 0.00869511 |
| 0.105647  | 1 | 898  | 18 | 0.00986035 |
| 0.0836845 | 1 | 715  | 14 | 0.0075034  |
| 0.0922285 | 1 | 788  | 22 | 0.0068943  |
| 0.0720244 | 1 | 613  | 12 | 0.00943663 |
| 0.065916  | 1 | 562  | 12 | 0.00829788 |
| 0.0776471 | 1 | 660  | 12 | 0.0080154  |
| 0.039554  | 1 | 816  | 23 | 0.00496107 |
| 0.0985882 | 1 | 838  | 23 | 0.00796243 |
| 0.0942353 | 1 | 801  | 22 | 0.00777705 |
| 0.0985095 | 1 | 879  | 25 | 0.00527886 |
| 0.0959319 | 1 | 856  | 24 | 0.00843912 |
| 0.0792334 | 1 | 707  | 20 | 0.0085627  |
| 0.0736727 | 1 | 673  | 20 | 0.00820077 |
| 0.0883415 | 1 | 807  | 23 | 0.00697375 |
| 0.0681176 | 1 | 579  | 17 | 0.00827139 |
| 0.0503009 | 1 | 911  | 25 | 0.00640879 |
| 0.084543  | 1 | 728  | 20 | 0.00503169 |
| 0.101412  | 1 | 862  | 24 | 0.00796243 |
| 0.0983529 | 1 | 836  | 24 | 0.00869511 |
| 0.0694118 | 1 | 590  | 17 | 0.00585265 |
| 0.0708235 | 1 | 602  | 17 | 0.00865981 |
| 0.0362393 | 1 | 784  | 14 | 0.00843029 |
| 0.186916  | 1 | 1600 | 45 | 0.00839498 |
| 0.0743219 | 1 | 633  | 18 | 0.00706202 |
| 0.088294  | 1 | 752  | 16 | 0.00692961 |
| 0.0828965 | 1 | 854  | 23 | 0.00793595 |
| 0.0558986 | 1 | 869  | 24 | 0.00790946 |
| 0.0780848 | 1 | 667  | 18 | 0.00511997 |
| 0.0722353 | 1 | 614  | 10 | 0.00761816 |
| 0.0922353 | 1 | 784  | 18 | 0.00558783 |
| 0.0694591 | 1 | 592  | 16 | 0.00668244 |
| 0.074387  | 1 | 634  | 12 | 0.00921594 |
| 0.0664706 | 1 | 565  | 16 | 0.00916297 |
| 0.071672  | 1 | 610  | 17 | 0.00914532 |

|            |           |      |    |            |
|------------|-----------|------|----|------------|
| 0.0688389  | 1         | 600  | 17 | 0.00929539 |
| 0.0928981  | 1         | 794  | 20 | 0.00688547 |
| 0.0528161  | 1         | 934  | 26 | 0.00803305 |
| 0.0469351  | 1         | 830  | 24 | 0.00826257 |
| 0.0723259  | 1         | 616  | 16 | 0.00838615 |
| 0.0848574  | 1         | 747  | 14 | 0.00587913 |
| 0.0755294  | 1         | 642  | 17 | 0.00680602 |
| 0.0801177  | 1         | 681  | 19 | 0.00850091 |
| 0.0723189  | 1         | 615  | 16 | 0.00876573 |
| 0.05862    | 1         | 576  | 16 | 0.0065412  |
| 0.0869317  | 1         | 761  | 16 | 0.00483749 |
| 0.0921176  | 1         | 783  | 22 | 0.00926008 |
| 0.0836471  | 1         | 711  | 20 | 0.00481983 |
| 0.0700786  | 1         | 597  | 11 | 0.00929539 |
| 0.084517   | 1         | 720  | 14 | 0.00843912 |
| 0.0701326  | 1         | 603  | 17 | 0.00972794 |
| 0.0730567  | 1         | 625  | 16 | 0.00658534 |
| 0.0642326  | 1         | 570  | 14 | 0.00848325 |
| 0.0719146  | 1         | 613  | 17 | 0.00822726 |
| 0.0388319  | 1         | 613  | 17 | 0.00822726 |
| 0.0786016  | 1         | 670  | 19 | 0.00849208 |
| 0.104817   | 1         | 1347 | 38 | 0.00541128 |
| 0.00658669 | 0.0415739 | 1347 | 38 | 0.00541128 |
| 0.052136   | 1         | 670  | 18 | 0.00944545 |
| 0.078805   | 1         | 670  | 18 | 0.00944545 |
| 0.0877647  | 1         | 746  | 21 | 0.00865098 |
| 0.0566493  | 1         | 728  | 21 | 0.00617927 |
| 0.0856269  | 1         | 728  | 21 | 0.00617927 |
| 0.0878824  | 1         | 747  | 21 | 0.00684133 |
| 0.120924   | 1         | 1554 | 43 | 0.00621458 |
| 0.0476358  | 0.260618  | 1554 | 43 | 0.00621458 |
| 0.0789996  | 1         | 676  | 18 | 0.00511997 |
| 0.0798981  | 1         | 721  | 20 | 0.00825374 |
| 0.0844559  | 1         | 721  | 20 | 0.00825374 |
| 0.069869   | 1         | 608  | 15 | 0.0090747  |
| 0.0715294  | 1         | 608  | 15 | 0.0090747  |
| 0.0705072  | 1         | 727  | 14 | 0.00496107 |
| 0.0718786  | 1         | 616  | 17 | 0.00752988 |
| 0.0771295  | 1         | 661  | 18 | 0.00858036 |
| 0.0445819  | 1         | 627  | 18 | 0.0073445  |
| 0.0449374  | 1         | 632  | 18 | 0.00524355 |
| 0.0727059  | 1         | 618  | 18 | 0.0083067  |
| 0.0748626  | 1         | 640  | 16 | 0.00415777 |
| 0.0664003  | 1         | 565  | 16 | 0.00470507 |
| 0.0683875  | 1         | 612  | 16 | 0.00977207 |
| 0.0769412  | 1         | 654  | 15 | 0.00868629 |
| 0.105059   | 1         | 893  | 26 | 0.00463445 |

|            |           |      |    |            |
|------------|-----------|------|----|------------|
| 0.0718451  | 1         | 616  | 13 | 0.00866863 |
| 0.0700674  | 1         | 603  | 14 | 0.00442259 |
| 0.0690056  | 1         | 594  | 13 | 0.00865981 |
| 0.0449445  | 1         | 741  | 21 | 0.00833319 |
| 0.0534967  | 1         | 882  | 25 | 0.00440494 |
| 0.0451265  | 1         | 744  | 21 | 0.00918946 |
| 0.116353   | 1         | 989  | 22 | 0.00901291 |
| 0.0964706  | 1         | 820  | 23 | 0.0085627  |
| 0.113802   | 1         | 968  | 27 | 0.00678837 |
| 0.0747126  | 1         | 637  | 18 | 0.00825374 |
| 0.0877049  | 1         | 749  | 21 | 0.00743278 |
| 0.0570253  | 1         | 485  | 13 | 0.00886284 |
| 0.0744791  | 1         | 722  | 19 | 0.00539362 |
| 0.0782229  | 1         | 699  | 19 | 0.00764464 |
| 0.0705106  | 1         | 609  | 17 | 0.00842146 |
| 0.0528717  | 1         | 591  | 15 | 0.00820077 |
| 0.0725863  | 1         | 618  | 17 | 0.00838615 |
| 0.0998823  | 1         | 849  | 23 | 0.00681485 |
| 0.0956797  | 1         | 815  | 22 | 0.00759167 |
| 0.0655294  | 1         | 557  | 16 | 0.00986918 |
| 0.0232941  | 0.276923  | 715  | 19 | 0.0071503  |
| 0.0977647  | 1         | 831  | 22 | 0.0074063  |
| 0.0717478  | 1         | 610  | 17 | 0.0079536  |
| 0.0350506  | 0.559099  | 533  | 10 | 0.00837732 |
| 0.0687032  | 1         | 587  | 17 | 0.00919828 |
| 0.0488438  | 1         | 640  | 18 | 0.00719444 |
| 0.0745834  | 1         | 640  | 18 | 0.00719444 |
| 0.0713198  | 1         | 609  | 16 | 0.00922477 |
| 0.11894    | 1         | 1055 | 29 | 0.00805953 |
| 0.0688646  | 1         | 612  | 17 | 0.00648823 |
| 0.0696121  | 1         | 594  | 17 | 0.00804188 |
| 0.0796533  | 1         | 680  | 12 | 0.00758285 |
| 0.0386067  | 1         | 716  | 20 | 0.00573789 |
| 0.0414105  | 1         | 768  | 22 | 0.00745043 |
| 0.0711852  | 1         | 606  | 17 | 0.00999276 |
| 0.0431424  | 1         | 620  | 17 | 0.00466976 |
| 0.0511648  | 1         | 593  | 17 | 0.00985152 |
| 0.00282353 | 0.0351391 | 683  | 19 | 0.00472273 |
| 0.0803151  | 1         | 683  | 19 | 0.0070532  |
| 0.0418785  | 1         | 659  | 18 | 0.00805071 |
| 0.0748235  | 1         | 636  | 18 | 0.00651472 |
| 0.113765   | 1         | 967  | 28 | 0.00648823 |
| 0.0730107  | 1         | 623  | 18 | 0.00771526 |
| 0.069446   | 1         | 603  | 16 | 0.00814781 |
| 0.0719069  | 1         | 612  | 16 | 0.00932187 |
| 0.068408   | 1         | 605  | 18 | 0.00933952 |
| 0.057069   | 1         | 574  | 16 | 0.00937483 |

|           |   |      |    |            |
|-----------|---|------|----|------------|
| 0.0681538 | 1 | 608  | 17 | 0.00624106 |
| 0.0767059 | 1 | 652  | 17 | 0.00842146 |
| 0.070642  | 1 | 603  | 17 | 0.00845677 |
| 0.0695083 | 1 | 605  | 17 | 0.00805071 |
| 0.072864  | 1 | 620  | 15 | 0.00934835 |
| 0.0727465 | 1 | 619  | 17 | 0.00994862 |
| 0.0831765 | 1 | 707  | 20 | 0.00525238 |
| 0.0720626 | 1 | 617  | 11 | 0.00825374 |
| 0.137647  | 1 | 1170 | 25 | 0.00617044 |
| 0.0714746 | 1 | 1109 | 29 | 0.00640879 |
| 0.0564058 | 1 | 1161 | 32 | 0.00708851 |
| 0.0696385 | 1 | 603  | 17 | 0.00975442 |
| 0.086     | 1 | 731  | 20 | 0.00887167 |
| 0.06639   | 1 | 608  | 16 | 0.00813898 |
| 0.072     | 1 | 612  | 15 | 0.00835967 |
| 0.0870431 | 1 | 743  | 21 | 0.0075034  |
| 0.0824234 | 1 | 702  | 15 | 0.00617927 |
| 0.0850277 | 1 | 736  | 21 | 0.00562313 |
| 0.076064  | 1 | 647  | 14 | 0.0061881  |
| 0.0965882 | 1 | 821  | 22 | 0.00678837 |
| 0.0724146 | 1 | 619  | 17 | 0.00986035 |
| 0.0921269 | 1 | 784  | 17 | 0.00754754 |
| 0.0707059 | 1 | 601  | 17 | 0.00838615 |
| 0.0468466 | 1 | 592  | 17 | 0.00722092 |
| 0.0717603 | 1 | 618  | 17 | 0.00715913 |
| 0.0727059 | 1 | 618  | 18 | 0.00807719 |
| 0.0823529 | 1 | 700  | 20 | 0.00903056 |
| 0.0761176 | 1 | 647  | 11 | 0.00464328 |
| 0.0721176 | 1 | 613  | 17 | 0.00850091 |
| 0.0697996 | 1 | 606  | 17 | 0.0083067  |
| 0.0592941 | 1 | 504  | 14 | 0.00977207 |
| 0.084     | 1 | 714  | 20 | 0.00966614 |
| 0.0721638 | 1 | 631  | 18 | 0.00629403 |
| 0.0684964 | 1 | 584  | 14 | 0.00829788 |
| 0.096     | 1 | 816  | 20 | 0.00804188 |
| 0.0142834 | 1 | 607  | 16 | 0.0071503  |
| 0.0179071 | 1 | 761  | 21 | 0.0076976  |
| 0.0929412 | 1 | 790  | 18 | 0.00588796 |
| 0.040545  | 1 | 610  | 10 | 0.00681485 |
| 0.0538109 | 1 | 610  | 10 | 0.00681485 |
| 0.0780316 | 1 | 666  | 19 | 0.005323   |
| 0.0847059 | 1 | 720  | 21 | 0.00719444 |
| 0.0692732 | 1 | 590  | 17 | 0.00829788 |
| 0.0746951 | 1 | 637  | 18 | 0.00835084 |
| 0.0798824 | 1 | 679  | 19 | 0.00863332 |
| 0.0503529 | 1 | 428  | 12 | 0.00772409 |
| 0.0684964 | 1 | 584  | 13 | 0.00888049 |

|           |          |      |    |            |
|-----------|----------|------|----|------------|
| 0.0225882 | 0.280292 | 685  | 19 | 0.00817429 |
| 0.0356567 | 1        | 531  | 14 | 0.00621458 |
| 0.0551974 | 1        | 822  | 16 | 0.00752105 |
| 0.0767059 | 1        | 652  | 18 | 0.00678837 |
| 0.0707894 | 1        | 625  | 18 | 0.0089776  |
| 0.072489  | 1        | 625  | 18 | 0.0089776  |
| 0.0748235 | 1        | 636  | 17 | 0.00534948 |
| 0.0722353 | 1        | 614  | 17 | 0.00956021 |
| 0.0521066 | 1        | 444  | 25 | 0.00682368 |
| 0.0734118 | 1        | 624  | 18 | 0.00681485 |
| 0.0341791 | 1        | 656  | 18 | 0.0060292  |
| 0.0523529 | 0.678354 | 656  | 18 | 0.0060292  |
| 0.0691639 | 1        | 589  | 17 | 0.00946311 |
| 0.0962893 | 1        | 820  | 23 | 0.00827139 |
| 0.0756224 | 1        | 644  | 18 | 0.00790946 |
| 0.0655607 | 1        | 660  | 14 | 0.00719444 |
| 0.0763529 | 1        | 649  | 19 | 0.0081125  |
| 0.0692941 | 1        | 589  | 13 | 0.00817429 |
| 0.124353  | 1        | 1057 | 22 | 0.0063823  |
| 0.0743005 | 1        | 632  | 16 | 0.00822726 |
| 0.0938303 | 1        | 803  | 20 | 0.00608217 |
| 0.0419546 | 1        | 595  | 17 | 0.00977207 |
| 0.0742353 | 1        | 631  | 18 | 0.00513762 |
| 0.0700188 | 1        | 596  | 10 | 0.0057732  |
| 0.0924706 | 1        | 786  | 18 | 0.00813015 |
| 0.0793614 | 1        | 691  | 18 | 0.00545541 |
| 0.0532966 | 1        | 831  | 22 | 0.00880987 |
| 0.0281552 | 1        | 601  | 17 | 0.00901291 |
| 0.0589505 | 1        | 601  | 17 | 0.00901291 |
| 0.0217371 | 1        | 464  | 11 | 0.00972794 |
| 0.0750588 | 1        | 638  | 18 | 0.00774174 |
| 0.0894118 | 1        | 760  | 22 | 0.00604686 |
| 0.0738824 | 1        | 628  | 15 | 0.00509348 |
| 0.0712941 | 1        | 606  | 17 | 0.00674423 |
| 0.0706976 | 1        | 601  | 17 | 0.00986035 |
| 0.0390218 | 1        | 592  | 17 | 0.00867746 |
| 0.0685518 | 1        | 1040 | 28 | 0.00697375 |
| 0.0701405 | 1        | 599  | 14 | 0.00704437 |
| 0.0410073 | 1        | 596  | 16 | 0.00921594 |
| 0.0687413 | 1        | 592  | 14 | 0.00963083 |
| 0.0712477 | 1        | 619  | 18 | 0.00920711 |
| 0.0795028 | 1        | 678  | 15 | 0.00731802 |
| 0.073853  | 1        | 631  | 12 | 0.00536714 |
| 0.0771765 | 1        | 656  | 18 | 0.00848325 |
| 0.0523332 | 1        | 720  | 19 | 0.00919828 |
| 0.101412  | 1        | 862  | 19 | 0.00488162 |
| 0.0863529 | 1        | 734  | 21 | 0.0084656  |

|           |          |      |    |            |
|-----------|----------|------|----|------------|
| 0.104     | 1        | 884  | 24 | 0.00837732 |
| 0.075     | 1        | 1074 | 26 | 0.00842146 |
| 0.0651765 | 1        | 554  | 16 | 0.00849208 |
| 0.0735087 | 1        | 626  | 16 | 0.00777705 |
| 0.0703529 | 1        | 598  | 11 | 0.00883636 |
| 0.0637647 | 1        | 542  | 15 | 0.00867746 |
| 0.0701176 | 1        | 596  | 14 | 0.00908353 |
| 0.0909412 | 1        | 773  | 22 | 0.00570258 |
| 0.0453513 | 1        | 639  | 18 | 0.00648823 |
| 0.046607  | 1        | 682  | 14 | 0.00652354 |
| 0.0912941 | 1        | 776  | 20 | 0.00908353 |
| 0.0749151 | 1        | 640  | 15 | 0.00850091 |
| 0.0215887 | 1        | 340  | 10 | 0.00928656 |
| 0.0647872 | 1        | 586  | 16 | 0.00808601 |
| 0.0340625 | 1        | 654  | 18 | 0.00965731 |
| 0.0900922 | 1        | 772  | 22 | 0.00868629 |
| 0.0959272 | 1        | 822  | 23 | 0.00847443 |
| 0.0956593 | 1        | 822  | 23 | 0.00847443 |
| 0.067448  | 1        | 587  | 16 | 0.00650589 |
| 0.0965431 | 1        | 930  | 23 | 0.00826257 |
| 0.0407868 | 1        | 649  | 18 | 0.00700906 |
| 0.103236  | 1        | 887  | 19 | 0.00828022 |
| 0.0976904 | 1        | 884  | 22 | 0.00557017 |
| 0.0700152 | 1        | 598  | 10 | 0.00655885 |
| 0.0731163 | 1        | 622  | 17 | 0.0057732  |
| 0.0838808 | 1        | 715  | 19 | 0.00678837 |
| 0.0330211 | 0.579055 | 487  | 14 | 0.0079536  |
| 0.0571328 | 1        | 487  | 14 | 0.0079536  |
| 0.0681618 | 1        | 620  | 16 | 0.00997511 |
| 0.0721876 | 1        | 625  | 17 | 0.00752105 |
| 0.0680792 | 1        | 588  | 16 | 0.00796243 |
| 0.115781  | 1        | 1000 | 23 | 0.00762698 |
| 0.0710588 | 1        | 604  | 17 | 0.00442259 |
| 0.0689332 | 1        | 588  | 17 | 0.00909235 |
| 0.0742551 | 1        | 638  | 18 | 0.0059321  |
| 0.090433  | 1        | 777  | 22 | 0.00890698 |
| 0.0515189 | 0.749191 | 618  | 10 | 0.00614396 |
| 0.0818054 | 1        | 696  | 18 | 0.00821843 |
| 0.0727059 | 1        | 618  | 17 | 0.00622341 |
| 0.0766884 | 1        | 729  | 14 | 0.00737099 |
| 0.0883529 | 1        | 751  | 21 | 0.00662065 |
| 0.0752751 | 1        | 643  | 16 | 0.00622341 |
| 0.114674  | 1        | 980  | 26 | 0.00465211 |
| 0.0729412 | 1        | 620  | 17 | 0.00700906 |
| 0.0680153 | 1        | 585  | 13 | 0.0072474  |
| 0.0470004 | 1        | 890  | 25 | 0.00719444 |
| 0.104571  | 1        | 890  | 25 | 0.00719444 |



|           |          |      |    |            |
|-----------|----------|------|----|------------|
| 0.0383854 | 1        | 582  | 14 | 0.00860684 |
| 0.0607059 | 1        | 516  | 14 | 0.00735333 |
| 0.0811445 | 1        | 692  | 16 | 0.00648823 |
| 0.0713782 | 1        | 607  | 11 | 0.00842146 |
| 0.0688567 | 1        | 589  | 12 | 0.00672658 |
| 0.0767059 | 1        | 652  | 18 | 0.00826257 |
| 0.0767059 | 1        | 652  | 18 | 0.00826257 |
| 0.0703529 | 1        | 598  | 17 | 0.00914532 |
| 0.0741176 | 1        | 630  | 17 | 0.00559665 |
| 0.0723792 | 1        | 620  | 17 | 0.00843029 |
| 0.101681  | 1        | 871  | 25 | 0.0046168  |
| 0.0733131 | 1        | 628  | 18 | 0.00687664 |
| 0.123044  | 1        | 1046 | 29 | 0.00919828 |
| 0.0464717 | 1        | 704  | 20 | 0.00956021 |
| 0.0625069 | 0.799716 | 704  | 20 | 0.00956021 |
| 0.0546821 | 1        | 473  | 13 | 0.00956904 |
| 0.0708428 | 1        | 717  | 18 | 0.00722974 |
| 0.0260844 | 0.342412 | 771  | 15 | 0.00798008 |
| 0.0468551 | 1        | 590  | 12 | 0.00814781 |
| 0.0693221 | 1        | 590  | 12 | 0.00814781 |
| 0.0466361 | 1        | 662  | 18 | 0.00608217 |
| 0.0436069 | 1        | 619  | 18 | 0.00617044 |
| 0.0870588 | 1        | 740  | 21 | 0.00661182 |
| 0.0500191 | 1        | 654  | 19 | 0.00683251 |
| 0.0741176 | 1        | 630  | 17 | 0.00722974 |
| 0.100235  | 1        | 852  | 21 | 0.00642644 |
| 0.0777612 | 1        | 678  | 19 | 0.00527886 |
| 0.0392349 | 1        | 601  | 17 | 0.00712381 |
| 0.0483745 | 1        | 741  | 18 | 0.00919828 |
| 0.0492884 | 1        | 755  | 21 | 0.00762698 |
| 0.0802353 | 1        | 682  | 19 | 0.00730919 |
| 0.0718824 | 1        | 611  | 17 | 0.00860684 |
| 0.0687059 | 1        | 584  | 10 | 0.0041048  |
| 0.0366274 | 1        | 616  | 12 | 0.00835084 |
| 0.0723599 | 1        | 616  | 12 | 0.00835084 |
| 0.0705815 | 1        | 619  | 13 | 0.00798891 |
| 0.03971   | 1        | 586  | 17 | 0.0089776  |
| 0.0395744 | 1        | 584  | 16 | 0.00929539 |
| 0.070262  | 1        | 598  | 17 | 0.00930421 |
| 0.0834215 | 1        | 710  | 20 | 0.00865098 |
| 0.0625536 | 1        | 656  | 19 | 0.00921594 |
| 0.0626851 | 1        | 656  | 19 | 0.00921594 |
| 0.0350511 | 1        | 689  | 15 | 0.00790064 |
| 0.0723939 | 1        | 616  | 14 | 0.00879222 |
| 0.0474054 | 1        | 655  | 18 | 0.0081125  |
| 0.0665882 | 1        | 566  | 10 | 0.00876573 |
| 0.0536471 | 1        | 456  | 13 | 0.0056761  |

|           |          |      |    |            |
|-----------|----------|------|----|------------|
| 0.0722554 | 1        | 618  | 17 | 0.00884518 |
| 0.112118  | 1        | 953  | 26 | 0.00833319 |
| 0.0810242 | 1        | 693  | 20 | 0.00753871 |
| 0.018947  | 1        | 619  | 17 | 0.00781236 |
| 0.0223447 | 1        | 730  | 21 | 0.00417542 |
| 0.0858722 | 1        | 730  | 21 | 0.00417542 |
| 0.0710427 | 1        | 605  | 17 | 0.00925125 |
| 0.020138  | 0.398714 | 622  | 17 | 0.00833319 |
| 0.0247807 | 1        | 582  | 16 | 0.00569376 |
| 0.0671218 | 1        | 816  | 21 | 0.0069914  |
| 0.0687059 | 1        | 584  | 15 | 0.00808601 |
| 0.095385  | 1        | 835  | 20 | 0.00497873 |
| 0.0739404 | 1        | 635  | 18 | 0.00585265 |
| 0.0258443 | 1        | 603  | 17 | 0.00842146 |
| 0.0708661 | 1        | 603  | 17 | 0.00842146 |
| 0.105288  | 1        | 896  | 25 | 0.00650589 |
| 0.032948  | 1        | 781  | 20 | 0.00544658 |
| 0.0918824 | 1        | 781  | 20 | 0.00544658 |
| 0.0767333 | 1        | 653  | 18 | 0.0061881  |
| 0.0260295 | 1        | 749  | 17 | 0.00909235 |
| 0.0720009 | 1        | 620  | 17 | 0.00535831 |
| 0.0294005 | 1        | 846  | 24 | 0.00546424 |
| 0.118918  | 1        | 1024 | 29 | 0.0080154  |
| 0.0703152 | 1        | 600  | 13 | 0.00874808 |
| 0.0709412 | 1        | 603  | 18 | 0.00866863 |
| 0.0623372 | 1        | 646  | 18 | 0.00983387 |
| 0.0757949 | 1        | 646  | 18 | 0.00983387 |
| 0.0649676 | 1        | 571  | 16 | 0.00698257 |
| 0.0758824 | 1        | 645  | 16 | 0.00880987 |
| 0.0816471 | 1        | 694  | 18 | 0.00915415 |
| 0.0446531 | 1        | 742  | 21 | 0.00545541 |
| 0.0711439 | 1        | 607  | 17 | 0.00799774 |
| 0.0886537 | 1        | 754  | 14 | 0.00503169 |
| 0.0773531 | 1        | 927  | 21 | 0.00928656 |
| 0.0734118 | 1        | 624  | 17 | 0.00805071 |
| 0.0696779 | 1        | 597  | 17 | 0.0099398  |
| 0.0584219 | 1        | 599  | 17 | 0.00765347 |
| 0.101251  | 1        | 866  | 21 | 0.00666478 |
| 0.0682391 | 1        | 596  | 13 | 0.00971028 |
| 0.115647  | 1        | 983  | 28 | 0.00820077 |
| 0.0704706 | 1        | 599  | 17 | 0.00847443 |
| 0.0429264 | 1        | 815  | 23 | 0.00697375 |
| 0.0383385 | 1        | 611  | 17 | 0.00975442 |
| 0.11225   | 1        | 975  | 22 | 0.00621458 |
| 0.0767902 | 1        | 667  | 19 | 0.0081125  |
| 0.065888  | 1        | 739  | 21 | 0.00542893 |
| 0.0569722 | 1        | 639  | 18 | 0.00712381 |

|           |   |      |    |            |
|-----------|---|------|----|------------|
| 0.163071  | 1 | 1829 | 44 | 0.0057732  |
| 0.0772941 | 1 | 657  | 17 | 0.005323   |
| 0.0594118 | 1 | 505  | 10 | 0.00965731 |
| 0.0695294 | 1 | 591  | 17 | 0.00973676 |
| 0.0376645 | 1 | 687  | 20 | 0.00850974 |
| 0.0914433 | 1 | 778  | 22 | 0.00415777 |
| 0.0671742 | 1 | 600  | 17 | 0.00934835 |
| 0.0666089 | 1 | 769  | 22 | 0.0046168  |
| 0.0698824 | 1 | 594  | 16 | 0.00601155 |
| 0.0908984 | 1 | 773  | 21 | 0.00809484 |
| 0.0695294 | 1 | 591  | 17 | 0.00964849 |
| 0.116235  | 1 | 988  | 28 | 0.00729154 |
| 0.0884706 | 1 | 752  | 22 | 0.00781236 |
| 0.0483825 | 1 | 676  | 17 | 0.00816546 |
| 0.0497354 | 1 | 423  | 12 | 0.00859801 |
| 0.176     | 1 | 1496 | 42 | 0.00842146 |
| 0.0839802 | 1 | 714  | 20 | 0.00560548 |
| 0.052223  | 1 | 592  | 17 | 0.00973676 |
| 0.0721311 | 1 | 616  | 18 | 0.00928656 |
| 0.0844706 | 1 | 718  | 20 | 0.00857153 |
| 0.0691765 | 1 | 588  | 17 | 0.00937483 |
| 0.0777452 | 1 | 662  | 12 | 0.00524355 |
| 0.0973139 | 1 | 855  | 23 | 0.00847443 |
| 0.100482  | 1 | 855  | 23 | 0.00847443 |
| 0.0694054 | 1 | 593  | 17 | 0.00678837 |
| 0.0697647 | 1 | 593  | 17 | 0.00678837 |
| 0.0769412 | 1 | 654  | 16 | 0.00761816 |
| 0.0696674 | 1 | 599  | 13 | 0.00833319 |
| 0.0648106 | 1 | 568  | 10 | 0.00873042 |
| 0.0919671 | 1 | 806  | 23 | 0.00672658 |
| 0.0638824 | 1 | 543  | 16 | 0.00761816 |
| 0.0685882 | 1 | 583  | 11 | 0.00564962 |
| 0.0448799 | 1 | 497  | 13 | 0.00938366 |
| 0.0593646 | 1 | 626  | 17 | 0.00971028 |
| 0.0695037 | 1 | 619  | 16 | 0.00842146 |
| 0.0738263 | 1 | 629  | 17 | 0.00775057 |
| 0.0519525 | 1 | 600  | 14 | 0.00998393 |
| 0.027092  | 1 | 417  | 11 | 0.00886284 |
| 0.0804652 | 1 | 685  | 16 | 0.00842146 |
| 0.0792941 | 1 | 674  | 19 | 0.00500521 |
| 0.0197603 | 1 | 572  | 16 | 0.00721209 |
| 0.0207275 | 1 | 600  | 17 | 0.00775057 |
| 0.116339  | 1 | 994  | 28 | 0.00737981 |
| 0.0706976 | 1 | 601  | 13 | 0.00828022 |
| 0.0766802 | 1 | 753  | 21 | 0.00777705 |
| 0.183412  | 1 | 1559 | 43 | 0.00752988 |
| 0.105059  | 1 | 893  | 22 | 0.00849208 |

|           |   |      |    |            |
|-----------|---|------|----|------------|
| 0.112118  | 1 | 953  | 21 | 0.00544658 |
| 0.0749412 | 1 | 637  | 13 | 0.00944545 |
| 0.0706573 | 1 | 602  | 13 | 0.00671775 |
| 0.100714  | 1 | 875  | 24 | 0.00731802 |
| 0.101765  | 1 | 865  | 25 | 0.00793595 |
| 0.0470866 | 1 | 598  | 17 | 0.00821843 |
| 0.104     | 1 | 884  | 22 | 0.00780354 |
| 0.0784706 | 1 | 667  | 19 | 0.00682368 |
| 0.0701176 | 1 | 596  | 17 | 0.00943663 |
| 0.0817647 | 1 | 695  | 20 | 0.00877456 |
| 0.0908235 | 1 | 772  | 22 | 0.00918946 |
| 0.0772941 | 1 | 657  | 19 | 0.00793595 |
| 0.0796471 | 1 | 677  | 19 | 0.00700023 |
| 0.0957647 | 1 | 814  | 22 | 0.00660299 |
| 0.0881176 | 1 | 749  | 21 | 0.00466976 |
| 0.0687023 | 1 | 585  | 14 | 0.00777705 |
| 0.0724823 | 1 | 624  | 18 | 0.0079536  |
| 0.086819  | 1 | 741  | 20 | 0.0046168  |
| 0.0619064 | 1 | 717  | 18 | 0.00995745 |
| 0.102072  | 1 | 872  | 24 | 0.00777705 |
| 0.0715881 | 1 | 609  | 17 | 0.00908353 |
| 0.0716302 | 1 | 609  | 17 | 0.00908353 |
| 0.0697955 | 1 | 867  | 24 | 0.00730036 |
| 0.0579617 | 1 | 720  | 19 | 0.00719444 |
| 0.0694379 | 1 | 593  | 17 | 0.00775057 |
| 0.0711023 | 1 | 607  | 15 | 0.00792712 |
| 0.0679634 | 1 | 601  | 12 | 0.00875691 |
| 0.0844706 | 1 | 718  | 20 | 0.0080154  |
| 0.0844706 | 1 | 718  | 20 | 0.0080154  |
| 0.0789412 | 1 | 671  | 19 | 0.00541128 |
| 0.0694329 | 1 | 917  | 25 | 0.00587913 |
| 0.0661176 | 1 | 562  | 16 | 0.00529652 |
| 0.0362931 | 1 | 589  | 16 | 0.00971028 |
| 0.0781176 | 1 | 664  | 19 | 0.00469624 |
| 0.0728127 | 1 | 620  | 15 | 0.00528769 |
| 0.0687831 | 1 | 585  | 11 | 0.00838615 |
| 0.128     | 1 | 1088 | 30 | 0.00813015 |
| 0.0694298 | 1 | 593  | 13 | 0.0056761  |
| 0.0703529 | 1 | 598  | 17 | 0.00805071 |
| 0.0699422 | 1 | 605  | 17 | 0.00986035 |
| 0.0748235 | 1 | 636  | 18 | 0.00753871 |
| 0.039732  | 1 | 338  | 10 | 0.00783002 |
| 0.035183  | 1 | 596  | 16 | 0.00932187 |
| 0.0877008 | 1 | 748  | 20 | 0.00451969 |
| 0.0944706 | 1 | 803  | 23 | 0.00898642 |
| 0.0755294 | 1 | 642  | 15 | 0.00634699 |
| 0.0949412 | 1 | 807  | 20 | 0.00599389 |

|           |          |      |    |            |
|-----------|----------|------|----|------------|
| 0.0697566 | 1        | 599  | 17 | 0.00909235 |
| 0.0862932 | 1        | 741  | 14 | 0.00519941 |
| 0.0417647 | 1        | 355  | 10 | 0.00980738 |
| 0.0928768 | 1        | 811  | 21 | 0.00885401 |
| 0.0602296 | 1        | 640  | 18 | 0.00729154 |
| 0.0747053 | 1        | 640  | 18 | 0.00729154 |
| 0.088     | 1        | 748  | 16 | 0.00744161 |
| 0.0909541 | 1        | 918  | 26 | 0.0076005  |
| 0.0795973 | 1        | 838  | 23 | 0.00757402 |
| 0.0858663 | 1        | 904  | 25 | 0.00783002 |
| 0.0712358 | 1        | 607  | 17 | 0.0084656  |
| 0.0535148 | 1        | 456  | 13 | 0.00849208 |
| 0.0950588 | 1        | 808  | 23 | 0.00527003 |
| 0.0586876 | 1        | 838  | 23 | 0.00813015 |
| 0.0714118 | 1        | 607  | 17 | 0.00972794 |
| 0.073202  | 1        | 628  | 16 | 0.00735333 |
| 0.044     | 1        | 374  | 11 | 0.00806836 |
| 0.0394197 | 1        | 432  | 11 | 0.0099398  |
| 0.0870588 | 1        | 740  | 21 | 0.0076005  |
| 0.0710972 | 1        | 613  | 16 | 0.00814781 |
| 0.0601176 | 1        | 511  | 14 | 0.00820077 |
| 0.0909412 | 1        | 773  | 21 | 0.00919828 |
| 0.0708235 | 1        | 602  | 17 | 0.00989566 |
| 0.0717647 | 1        | 610  | 17 | 0.00511114 |
| 0.0717647 | 1        | 610  | 17 | 0.00511114 |
| 0.0658856 | 1        | 613  | 17 | 0.00585265 |
| 0.0921312 | 1        | 795  | 22 | 0.00873925 |
| 0.0725882 | 1        | 617  | 12 | 0.00868629 |
| 0.0864502 | 1        | 735  | 21 | 0.0056761  |
| 0.0750751 | 1        | 650  | 14 | 0.0085627  |
| 0.114316  | 1        | 979  | 27 | 0.00745043 |
| 0.0799579 | 1        | 683  | 16 | 0.0085627  |
| 0.0778108 | 1        | 681  | 19 | 0.00759167 |
| 0.0364482 | 1        | 619  | 18 | 0.00723857 |
| 0.0496707 | 0.659259 | 675  | 18 | 0.00760933 |
| 0.0794118 | 1        | 675  | 18 | 0.00760933 |
| 0.0709412 | 1        | 603  | 14 | 0.00683251 |
| 0.0673474 | 1        | 587  | 13 | 0.0063823  |
| 0.068668  | 1        | 597  | 17 | 0.00971028 |
| 0.100826  | 1        | 1441 | 40 | 0.00889815 |
| 0.117972  | 1        | 1005 | 25 | 0.00842146 |
| 0.0383728 | 1        | 599  | 17 | 0.00888049 |
| 0.021284  | 1        | 608  | 17 | 0.00945428 |
| 0.0215291 | 1        | 615  | 17 | 0.00971028 |
| 0.0606838 | 1        | 852  | 24 | 0.00542893 |
| 0.0457414 | 1        | 645  | 18 | 0.00770643 |
| 0.14408   | 1        | 1229 | 32 | 0.00504052 |

|           |          |      |    |            |
|-----------|----------|------|----|------------|
| 0.0723529 | 1        | 615  | 18 | 0.00835967 |
| 0.0618611 | 1        | 817  | 23 | 0.0080154  |
| 0.0744976 | 1        | 645  | 13 | 0.00732685 |
| 0.0149915 | 1        | 589  | 17 | 0.00990449 |
| 0.072     | 1        | 612  | 14 | 0.00864215 |
| 0.0749412 | 1        | 637  | 18 | 0.00842146 |
| 0.113765  | 1        | 967  | 27 | 0.00773291 |
| 0.0870588 | 1        | 740  | 21 | 0.00530534 |
| 0.117176  | 1        | 996  | 26 | 0.00835084 |
| 0.0698824 | 1        | 594  | 17 | 0.00928656 |
| 0.0725882 | 1        | 617  | 17 | 0.00817429 |
| 0.095501  | 1        | 813  | 22 | 0.00813015 |
| 0.0747059 | 1        | 635  | 18 | 0.00915415 |
| 0.058844  | 1        | 677  | 19 | 0.00876573 |
| 0.0600173 | 1        | 973  | 27 | 0.00407832 |
| 0.0691765 | 1        | 588  | 14 | 0.00825374 |
| 0.0688235 | 1        | 585  | 14 | 0.00851857 |
| 0.110145  | 1        | 937  | 22 | 0.00589679 |
| 0.102353  | 1        | 870  | 24 | 0.00873042 |
| 0.0368616 | 1        | 607  | 17 | 0.00946311 |
| 0.0866743 | 1        | 761  | 20 | 0.00553486 |
| 0.0737647 | 1        | 627  | 14 | 0.00831553 |
| 0.0431463 | 1        | 633  | 18 | 0.00797126 |
| 0.0712941 | 1        | 606  | 15 | 0.00868629 |
| 0.0721457 | 1        | 618  | 17 | 0.00788298 |
| 0.121412  | 1        | 1032 | 29 | 0.00833319 |
| 0.0107527 | 0.148387 | 620  | 18 | 0.00773291 |
| 0.0707106 | 1        | 605  | 17 | 0.0067354  |
| 0.0274372 | 1        | 584  | 14 | 0.00964849 |
| 0.066     | 1        | 561  | 16 | 0.00988683 |
| 0.0861176 | 1        | 732  | 20 | 0.00845677 |
| 0.0584093 | 1        | 506  | 14 | 0.00984269 |
| 0.0755155 | 1        | 780  | 22 | 0.0064794  |
| 0.0692941 | 0.755128 | 780  | 22 | 0.0064794  |
| 0.115765  | 1        | 984  | 26 | 0.00798891 |
| 0.07      | 1        | 595  | 16 | 0.00892463 |
| 0.0712941 | 1        | 606  | 17 | 0.00742395 |
| 0.0703829 | 1        | 601  | 17 | 0.00726506 |
| 0.0515407 | 1        | 557  | 12 | 0.00655003 |
| 0.137506  | 1        | 1171 | 33 | 0.00662947 |
| 0.0711765 | 1        | 605  | 13 | 0.00978973 |
| 0.0722353 | 1        | 614  | 17 | 0.00777705 |
| 0.101529  | 1        | 863  | 25 | 0.00574672 |
| 0.0698824 | 1        | 594  | 17 | 0.00803305 |
| 0.0433813 | 1        | 700  | 20 | 0.00684133 |
| 0.0703994 | 1        | 601  | 17 | 0.00997511 |
| 0.0698918 | 1        | 601  | 17 | 0.00997511 |

|           |          |      |    |            |
|-----------|----------|------|----|------------|
| 0.0698824 | 1        | 594  | 17 | 0.00851857 |
| 0.0465453 | 1        | 708  | 20 | 0.0074063  |
| 0.0357419 | 1        | 600  | 17 | 0.00561431 |
| 0.0694722 | 1        | 591  | 15 | 0.00896877 |
| 0.122588  | 1        | 1042 | 27 | 0.00661182 |
| 0.0649984 | 1        | 613  | 17 | 0.00690313 |
| 0.0683587 | 1        | 606  | 17 | 0.0066383  |
| 0.07      | 1        | 595  | 17 | 0.00825374 |
| 0.068921  | 1        | 587  | 12 | 0.00906587 |
| 0.0704706 | 1        | 599  | 17 | 0.00515528 |
| 0.0798461 | 1        | 685  | 19 | 0.00813015 |
| 0.0724706 | 1        | 616  | 13 | 0.00624989 |
| 0.0750588 | 1        | 638  | 18 | 0.00634699 |
| 0.0702639 | 1        | 599  | 16 | 0.00760933 |
| 0.0689575 | 1        | 592  | 17 | 0.00737981 |
| 0.0876391 | 1        | 748  | 22 | 0.00821843 |
| 0.0944399 | 1        | 817  | 22 | 0.00815664 |
| 0.068445  | 1        | 603  | 12 | 0.00704437 |
| 0.0717647 | 1        | 610  | 17 | 0.00938366 |
| 0.0732941 | 1        | 623  | 17 | 0.00617044 |
| 0.0565993 | 0.642667 | 750  | 21 | 0.00700023 |
| 0.0882353 | 1        | 750  | 21 | 0.00700023 |
| 0.0872941 | 1        | 742  | 21 | 0.00624106 |
| 0.0860182 | 1        | 841  | 18 | 0.00547307 |
| 0.0848235 | 1        | 721  | 17 | 0.00782119 |
| 0.0699333 | 1        | 598  | 15 | 0.0070532  |
| 0.0755759 | 1        | 643  | 18 | 0.00585265 |
| 0.0679361 | 1        | 578  | 12 | 0.00719444 |
| 0.021517  | 1        | 459  | 12 | 0.00845677 |
| 0.0688235 | 1        | 585  | 17 | 0.00997511 |
| 0.069018  | 1        | 589  | 16 | 0.00938366 |
| 0.0621045 | 1        | 530  | 15 | 0.00976324 |
| 0.0695294 | 1        | 591  | 17 | 0.00766229 |
| 0.0822785 | 1        | 702  | 20 | 0.00670892 |
| 0.0698824 | 1        | 594  | 17 | 0.00466094 |
| 0.0363482 | 1        | 727  | 20 | 0.00887167 |
| 0.0716211 | 1        | 611  | 17 | 0.00964849 |
| 0.0544409 | 1        | 464  | 13 | 0.00948077 |
| 0.0990246 | 1        | 934  | 26 | 0.00774174 |
| 0.0710517 | 1        | 606  | 17 | 0.00991331 |
| 0.0711773 | 1        | 607  | 10 | 0.00526121 |
| 0.0584782 | 1        | 498  | 11 | 0.00787415 |
| 0.0633831 | 1        | 628  | 18 | 0.0072474  |
| 0.0716471 | 1        | 609  | 17 | 0.00906587 |
| 0.0704706 | 1        | 599  | 17 | 0.00852739 |
| 0.0920653 | 1        | 789  | 22 | 0.00726506 |
| 0.0691949 | 1        | 593  | 17 | 0.00511114 |

|           |          |      |    |            |
|-----------|----------|------|----|------------|
| 0.0728549 | 1        | 737  | 21 | 0.0063823  |
| 0.0756471 | 1        | 643  | 18 | 0.00760933 |
| 0.0872287 | 1        | 1310 | 36 | 0.00625872 |
| 0.066068  | 1        | 618  | 17 | 0.00948077 |
| 0.0651884 | 1        | 979  | 27 | 0.00866863 |
| 0.113903  | 1        | 979  | 27 | 0.00866863 |
| 0.0864407 | 1        | 765  | 22 | 0.0063823  |
| 0.117176  | 1        | 996  | 28 | 0.00909235 |
| 0.0680563 | 1        | 813  | 21 | 0.00756519 |
| 0.0714118 | 1        | 607  | 11 | 0.00995745 |
| 0.107647  | 1        | 915  | 26 | 0.00700906 |
| 0.0452941 | 1        | 385  | 10 | 0.0095249  |
| 0.0684112 | 1        | 583  | 16 | 0.00781236 |
| 0.0775294 | 1        | 659  | 18 | 0.00798891 |
| 0.0871979 | 1        | 754  | 21 | 0.00594975 |
| 0.0469453 | 1        | 584  | 12 | 0.00923359 |
| 0.0856942 | 1        | 732  | 21 | 0.00581734 |
| 0.0971765 | 1        | 826  | 23 | 0.00525238 |
| 0.0963884 | 1        | 822  | 20 | 0.00590562 |
| 0.0782353 | 1        | 665  | 19 | 0.00643527 |
| 0.0800187 | 1        | 684  | 19 | 0.00712381 |
| 0.0132941 | 0.138142 | 818  | 23 | 0.00780354 |
| 0.0388621 | 1        | 597  | 17 | 0.00822726 |
| 0.0702353 | 1        | 597  | 17 | 0.00822726 |
| 0.0420518 | 1        | 646  | 18 | 0.00572024 |
| 0.076     | 1        | 646  | 18 | 0.00572024 |
| 0.0635745 | 1        | 710  | 20 | 0.00517293 |
| 0.0709253 | 1        | 604  | 14 | 0.00868629 |
| 0.0960545 | 1        | 818  | 23 | 0.00489045 |
| 0.0654118 | 1        | 556  | 13 | 0.00745043 |
| 0.0803509 | 1        | 687  | 19 | 0.00578203 |
| 0.128706  | 1        | 1094 | 31 | 0.00525238 |
| 0.0714118 | 1        | 607  | 17 | 0.00973676 |
| 0.0624632 | 1        | 531  | 12 | 0.00870394 |
| 0.0700875 | 1        | 601  | 17 | 0.00865098 |
| 0.0714869 | 1        | 613  | 17 | 0.00971028 |
| 0.0733945 | 1        | 624  | 18 | 0.00753871 |
| 0.0449806 | 1        | 591  | 17 | 0.00889815 |
| 0.0764706 | 1        | 650  | 19 | 0.00636465 |
| 0.0399438 | 1        | 626  | 18 | 0.00409597 |
| 0.0431229 | 1        | 612  | 11 | 0.0080154  |
| 0.129647  | 1        | 1102 | 31 | 0.00888932 |
| 0.0887796 | 1        | 758  | 16 | 0.00650589 |
| 0.139494  | 1        | 1191 | 28 | 0.00637347 |
| 0.0944771 | 1        | 804  | 23 | 0.00662947 |
| 0.0798122 | 1        | 680  | 17 | 0.00731802 |
| 0.11115   | 1        | 947  | 22 | 0.00488162 |



|           |          |      |    |            |
|-----------|----------|------|----|------------|
| 0.0507059 | 0.698541 | 617  | 18 | 0.00838615 |
| 0.0546768 | 1        | 598  | 17 | 0.00745926 |
| 0.0885983 | 1        | 969  | 23 | 0.00752105 |
| 0.0722906 | 1        | 623  | 14 | 0.00697375 |
| 0.0966803 | 1        | 830  | 18 | 0.00692961 |
| 0.0196619 | 0.304498 | 867  | 18 | 0.00530534 |
| 0.0547404 | 1        | 735  | 20 | 0.00844794 |
| 0.0741789 | 1        | 996  | 25 | 0.00714147 |
| 0.0398735 | 1        | 643  | 18 | 0.00852739 |
| 0.0399751 | 1        | 643  | 18 | 0.00852739 |
| 0.0414858 | 1        | 669  | 19 | 0.00565844 |
| 0.0415915 | 1        | 669  | 19 | 0.00565844 |
| 0.0430361 | 1        | 694  | 19 | 0.00838615 |
| 0.0431458 | 1        | 694  | 19 | 0.00838615 |
| 0.076     | 1        | 646  | 17 | 0.00735333 |
| 0.13962   | 1        | 1189 | 33 | 0.00814781 |
| 0.0692941 | 1        | 589  | 14 | 0.00973676 |
| 0.17      | 1        | 1445 | 37 | 0.00814781 |
| 0.0708235 | 1        | 602  | 14 | 0.00822726 |
| 0.125176  | 1        | 1064 | 29 | 0.00542893 |
| 0.0711439 | 1        | 607  | 17 | 0.00986918 |
| 0.0726676 | 1        | 620  | 17 | 0.00807719 |
| 0.0798879 | 1        | 684  | 18 | 0.00738864 |
| 0.0723529 | 1        | 615  | 14 | 0.0089776  |
| 0.0901176 | 1        | 766  | 22 | 0.00660299 |
| 0.0706515 | 1        | 604  | 11 | 0.00722974 |
| 0.105176  | 1        | 894  | 25 | 0.00757402 |
| 0.0725882 | 1        | 617  | 15 | 0.00901291 |
| 0.0915294 | 1        | 778  | 22 | 0.00662947 |
| 0.0704736 | 1        | 622  | 17 | 0.0077594  |
| 0.086     | 1        | 731  | 20 | 0.00511114 |
| 0.068     | 1        | 578  | 16 | 0.00873925 |
| 0.0998823 | 1        | 849  | 21 | 0.0080154  |
| 0.0595284 | 1        | 616  | 16 | 0.00965731 |
| 0.0540912 | 1        | 747  | 21 | 0.00842146 |
| 0.05105   | 1        | 705  | 20 | 0.00864215 |
| 0.0705219 | 1        | 600  | 17 | 0.00620575 |
| 0.0658762 | 1        | 600  | 17 | 0.00620575 |
| 0.105818  | 1        | 904  | 25 | 0.00609982 |
| 0.0976509 | 1        | 848  | 19 | 0.00887167 |
| 0.0743529 | 1        | 632  | 18 | 0.00794477 |
| 0.121934  | 1        | 1039 | 26 | 0.0077594  |
| 0.0728906 | 1        | 641  | 18 | 0.00799774 |
| 0.0704706 | 1        | 599  | 13 | 0.00767112 |
| 0.015194  | 0.214521 | 606  | 15 | 0.00668244 |
| 0.0399894 | 1        | 606  | 15 | 0.00668244 |
| 0.0622912 | 1        | 839  | 22 | 0.00925125 |

|           |          |      |    |            |
|-----------|----------|------|----|------------|
| 0.0721176 | 1        | 613  | 17 | 0.00463445 |
| 0.124706  | 1        | 1060 | 30 | 0.00592327 |
| 0.0413994 | 1        | 981  | 28 | 0.00867746 |
| 0.0571043 | 1        | 592  | 14 | 0.00843029 |
| 0.0872941 | 1        | 742  | 21 | 0.00752988 |
| 0.0524537 | 1        | 450  | 10 | 0.00890698 |
| 0.0698824 | 1        | 594  | 17 | 0.00902173 |
| 0.072874  | 1        | 623  | 16 | 0.00922477 |
| 0.033168  | 1        | 769  | 22 | 0.00802422 |
| 0.0189412 | 0.209363 | 769  | 22 | 0.00802422 |
| 0.025275  | 1        | 586  | 16 | 0.00822726 |
| 0.078     | 1        | 663  | 19 | 0.00822726 |
| 0.0707791 | 1        | 615  | 15 | 0.00956021 |
| 0.069283  | 1        | 602  | 16 | 0.00822726 |
| 0.0700886 | 1        | 609  | 17 | 0.00895994 |
| 0.0683623 | 1        | 594  | 17 | 0.00576437 |
| 0.0878054 | 1        | 751  | 21 | 0.00627637 |
| 0.0742353 | 1        | 631  | 18 | 0.00873042 |
| 0.0697032 | 1        | 681  | 19 | 0.00979856 |
| 0.105732  | 1        | 1033 | 29 | 0.00793595 |
| 0.0882145 | 1        | 750  | 21 | 0.00686782 |
| 0.0988235 | 1        | 840  | 24 | 0.00626754 |
| 0.0629582 | 1        | 541  | 15 | 0.00559665 |
| 0.108953  | 1        | 931  | 26 | 0.00463445 |
| 0.0470985 | 1        | 642  | 18 | 0.00408714 |
| 0.057818  | 1        | 619  | 13 | 0.00497873 |
| 0.114905  | 1        | 996  | 26 | 0.00562313 |
| 0.0702513 | 1        | 601  | 17 | 0.00874808 |
| 0.0701898 | 1        | 599  | 13 | 0.00979856 |
| 0.0548823 | 1        | 634  | 18 | 0.00776822 |
| 0.0768235 | 1        | 653  | 15 | 0.00477569 |
| 0.0750529 | 1        | 639  | 18 | 0.00758285 |
| 0.0853701 | 1        | 730  | 21 | 0.00789181 |
| 0.0790588 | 1        | 672  | 19 | 0.0074063  |
| 0.0849412 | 1        | 722  | 13 | 0.00834201 |
| 0.0940711 | 1        | 1190 | 28 | 0.00702671 |
| 0.120008  | 1        | 1190 | 28 | 0.00702671 |
| 0.0462956 | 1        | 588  | 15 | 0.00817429 |
| 0.0645443 | 1        | 592  | 11 | 0.00735333 |
| 0.0826495 | 1        | 705  | 17 | 0.00870394 |
| 0.0829119 | 1        | 705  | 17 | 0.00870394 |
| 0.0772567 | 1        | 659  | 19 | 0.00572907 |
| 0.0775021 | 1        | 659  | 19 | 0.00572907 |
| 0.0756902 | 1        | 647  | 18 | 0.00741512 |
| 0.0726486 | 1        | 621  | 15 | 0.00802422 |
| 0.0768701 | 1        | 1004 | 28 | 0.00743278 |
| 0.0452492 | 1        | 591  | 16 | 0.00861567 |

|           |         |      |    |            |
|-----------|---------|------|----|------------|
| 0.166934  | 1       | 1766 | 49 | 0.00775057 |
| 0.0714118 | 1       | 607  | 17 | 0.00730919 |
| 0.0938824 | 1       | 798  | 22 | 0.00495224 |
| 0.0454249 | 1       | 627  | 14 | 0.00909235 |
| 0.0589121 | 1       | 704  | 20 | 0.00883636 |
| 0.0234596 | 0.29711 | 865  | 23 | 0.0063823  |
| 0.0919626 | 1       | 865  | 23 | 0.0063823  |
| 0.0719915 | 1       | 612  | 16 | 0.00749457 |
| 0.0701116 | 1       | 597  | 17 | 0.00896877 |
| 0.0400404 | 1       | 516  | 15 | 0.00979856 |
| 0.0674365 | 1       | 584  | 17 | 0.00901291 |
| 0.06672   | 1       | 584  | 17 | 0.00901291 |
| 0.0483706 | 1       | 613  | 18 | 0.00971028 |
| 0.0685929 | 1       | 584  | 16 | 0.00805953 |
| 0.115115  | 1       | 987  | 28 | 0.00814781 |
| 0.0799395 | 1       | 687  | 12 | 0.00820077 |
| 0.0685882 | 1       | 583  | 16 | 0.00526121 |
| 0.069172  | 1       | 589  | 17 | 0.00933952 |
| 0.0367776 | 1       | 588  | 15 | 0.00706202 |
| 0.0251787 | 1       | 715  | 20 | 0.00761816 |
| 0.124912  | 1       | 1062 | 30 | 0.00773291 |
| 0.0730881 | 1       | 626  | 16 | 0.00859801 |
| 0.0715294 | 1       | 608  | 17 | 0.00585265 |
| 0.0948235 | 1       | 806  | 23 | 0.00880104 |
| 0.0868235 | 1       | 738  | 18 | 0.00730919 |
| 0.0605067 | 1       | 738  | 18 | 0.00730919 |
| 0.0834118 | 1       | 709  | 20 | 0.00921594 |
| 0.058129  | 1       | 709  | 20 | 0.00921594 |
| 0.126118  | 1       | 1072 | 30 | 0.00659416 |
| 0.0720249 | 1       | 647  | 18 | 0.00849208 |
| 0.0744877 | 1       | 647  | 18 | 0.00849208 |
| 0.0756471 | 1       | 643  | 14 | 0.00929539 |
| 0.0822353 | 1       | 699  | 20 | 0.0081125  |
| 0.0387497 | 1       | 600  | 17 | 0.0083685  |
| 0.0801177 | 1       | 681  | 13 | 0.00710616 |
| 0.041075  | 1       | 619  | 12 | 0.0085627  |
| 0.0714118 | 1       | 607  | 17 | 0.00822726 |
| 0.0795402 | 1       | 692  | 19 | 0.00568493 |
| 0.0707591 | 1       | 604  | 12 | 0.00910118 |
| 0.0704077 | 1       | 601  | 17 | 0.00892463 |
| 0.0728235 | 1       | 619  | 18 | 0.00868629 |
| 0.0695604 | 1       | 875  | 25 | 0.00672658 |
| 0.131059  | 1       | 1114 | 31 | 0.00662947 |
| 0.048641  | 1       | 655  | 19 | 0.00592327 |
| 0.0802734 | 1       | 693  | 17 | 0.00735333 |
| 0.0818001 | 1       | 698  | 18 | 0.005067   |
| 0.0748857 | 1       | 639  | 18 | 0.00774174 |

|           |          |      |    |            |
|-----------|----------|------|----|------------|
| 0.0504706 | 0.638393 | 672  | 19 | 0.00528769 |
| 0.0790588 | 1        | 672  | 19 | 0.00528769 |
| 0.0792382 | 1        | 674  | 18 | 0.00775057 |
| 0.0977647 | 1        | 831  | 23 | 0.00587913 |
| 0.0903824 | 1        | 780  | 18 | 0.00752105 |
| 0.0710588 | 1        | 604  | 17 | 0.00903056 |
| 0.0375954 | 1        | 601  | 17 | 0.00922477 |
| 0.0641039 | 1        | 602  | 17 | 0.00622341 |
| 0.0728235 | 1        | 619  | 13 | 0.00837732 |
| 0.0663794 | 1        | 570  | 16 | 0.00517293 |
| 0.0537427 | 1        | 695  | 20 | 0.00643527 |
| 0.0475564 | 1        | 615  | 15 | 0.00833319 |
| 0.0722353 | 1        | 614  | 17 | 0.00669127 |
| 0.0721692 | 1        | 696  | 20 | 0.00473156 |
| 0.0697647 | 1        | 593  | 17 | 0.00784767 |
| 0.0695764 | 1        | 593  | 17 | 0.00784767 |
| 0.117529  | 1        | 999  | 28 | 0.00415777 |
| 0.0702353 | 1        | 597  | 17 | 0.00890698 |
| 0.0881869 | 1        | 751  | 17 | 0.00730919 |
| 0.0725693 | 1        | 618  | 18 | 0.00868629 |
| 0.0672511 | 1        | 583  | 15 | 0.0070532  |
| 0.0685882 | 1        | 583  | 15 | 0.0070532  |
| 0.0627059 | 1        | 533  | 10 | 0.00718561 |
| 0.0931765 | 1        | 792  | 23 | 0.00472273 |
| 0.0351221 | 1        | 610  | 16 | 0.00888932 |
| 0.0822287 | 1        | 701  | 20 | 0.00865981 |
| 0.137278  | 1        | 1174 | 32 | 0.00721209 |
| 0.0702353 | 1        | 597  | 17 | 0.00860684 |
| 0.0722594 | 1        | 615  | 18 | 0.00873925 |
| 0.068671  | 1        | 587  | 17 | 0.0080154  |
| 0.0763529 | 1        | 649  | 18 | 0.00542893 |
| 0.0957796 | 1        | 817  | 23 | 0.005323   |
| 0.0720911 | 1        | 614  | 17 | 0.0061881  |
| 0.0704706 | 1        | 599  | 17 | 0.00774174 |
| 0.0314561 | 1        | 353  | 10 | 0.00899525 |
| 0.113347  | 1        | 969  | 26 | 0.00700906 |
| 0.0577647 | 1        | 491  | 14 | 0.00880987 |
| 0.0709328 | 1        | 603  | 17 | 0.00976324 |
| 0.0766526 | 1        | 654  | 17 | 0.00863332 |
| 0.0694493 | 1        | 594  | 13 | 0.00793595 |
| 0.0829022 | 1        | 705  | 20 | 0.00550838 |
| 0.0822637 | 1        | 705  | 20 | 0.00550838 |
| 0.0985419 | 1        | 838  | 23 | 0.00871277 |
| 0.097783  | 1        | 838  | 23 | 0.00871277 |
| 0.0496665 | 1        | 685  | 13 | 0.00562313 |
| 0.0781525 | 0.970803 | 685  | 13 | 0.00562313 |
| 0.043286  | 1        | 597  | 17 | 0.00757402 |

|           |   |      |    |            |
|-----------|---|------|----|------------|
| 0.070161  | 1 | 597  | 17 | 0.00757402 |
| 0.0723529 | 1 | 615  | 13 | 0.00990449 |
| 0.0708235 | 1 | 602  | 14 | 0.00898642 |
| 0.0710678 | 1 | 605  | 15 | 0.00892463 |
| 0.0802353 | 1 | 682  | 19 | 0.00876573 |
| 0.103647  | 1 | 881  | 26 | 0.00499638 |
| 0.0704804 | 1 | 600  | 17 | 0.00835084 |
| 0.0904499 | 1 | 770  | 22 | 0.00620575 |
| 0.0998823 | 1 | 849  | 24 | 0.00849208 |
| 0.0937397 | 1 | 849  | 24 | 0.00849208 |
| 0.0371787 | 1 | 826  | 23 | 0.00821843 |
| 0.0403745 | 1 | 897  | 25 | 0.00554369 |
| 0.0261962 | 1 | 582  | 16 | 0.00721209 |
| 0.0412357 | 1 | 582  | 16 | 0.00721209 |
| 0.0277715 | 1 | 617  | 18 | 0.00794477 |
| 0.0437155 | 1 | 617  | 18 | 0.00794477 |
| 0.10178   | 1 | 869  | 25 | 0.00584382 |
| 0.0673957 | 1 | 604  | 17 | 0.00906587 |
| 0.0843529 | 1 | 717  | 16 | 0.00784767 |
| 0.0958824 | 1 | 815  | 16 | 0.00704437 |
| 0.0721963 | 1 | 618  | 18 | 0.00408714 |
| 0.072     | 1 | 612  | 11 | 0.00869511 |
| 0.0787935 | 1 | 674  | 19 | 0.0061881  |
| 0.0687273 | 1 | 587  | 17 | 0.00936601 |
| 0.0701176 | 1 | 596  | 17 | 0.00898642 |
| 0.0745882 | 1 | 634  | 18 | 0.00871277 |
| 0.092     | 1 | 782  | 22 | 0.00650589 |
| 0.0704706 | 1 | 599  | 17 | 0.00972794 |
| 0.0530128 | 1 | 688  | 19 | 0.00790064 |
| 0.0499307 | 1 | 648  | 14 | 0.00609982 |
| 0.0738301 | 1 | 650  | 18 | 0.00772409 |
| 0.0809412 | 1 | 688  | 19 | 0.0093307  |
| 0.0318995 | 1 | 597  | 17 | 0.00804188 |
| 0.128588  | 1 | 1093 | 29 | 0.0067354  |
| 0.0478333 | 1 | 659  | 18 | 0.00825374 |
| 0.0475163 | 1 | 749  | 21 | 0.00700906 |
| 0.04574   | 1 | 721  | 20 | 0.00804188 |
| 0.0376197 | 1 | 593  | 17 | 0.00919828 |
| 0.0372796 | 1 | 1019 | 29 | 0.00875691 |
| 0.030987  | 1 | 847  | 23 | 0.0077594  |
| 0.0762563 | 1 | 651  | 17 | 0.00759167 |
| 0.0226824 | 1 | 620  | 18 | 0.00759167 |
| 0.0230116 | 1 | 629  | 18 | 0.00560548 |
| 0.0358594 | 1 | 759  | 21 | 0.00655003 |
| 0.0349617 | 1 | 740  | 21 | 0.00804188 |
| 0.0413272 | 1 | 634  | 18 | 0.0079536  |
| 0.0878244 | 1 | 748  | 15 | 0.00745043 |

|           |          |      |    |            |
|-----------|----------|------|----|------------|
| 0.0433406 | 1        | 876  | 24 | 0.005323   |
| 0.0848189 | 1        | 1494 | 41 | 0.00398121 |
| 0.175765  | 1        | 1494 | 41 | 0.00398121 |
| 0.0353696 | 1        | 623  | 18 | 0.00805071 |
| 0.0776471 | 1        | 660  | 17 | 0.0071503  |
| 0.0350836 | 0.431655 | 695  | 18 | 0.00858918 |
| 0.0466537 | 1        | 695  | 18 | 0.00858918 |
| 0.0422653 | 1        | 706  | 13 | 0.00805071 |
| 0.0438218 | 1        | 732  | 21 | 0.00613513 |
| 0.0351211 | 1        | 573  | 16 | 0.00986918 |
| 0.0506283 | 1        | 826  | 23 | 0.00558783 |
| 0.096349  | 1        | 826  | 23 | 0.00558783 |
| 0.0361101 | 1        | 619  | 16 | 0.00718561 |
| 0.0346517 | 1        | 594  | 17 | 0.00973676 |
| 0.106471  | 1        | 905  | 20 | 0.00480217 |
| 0.0437005 | 1        | 607  | 17 | 0.00717678 |
| 0.0652557 | 1        | 555  | 16 | 0.00774174 |
| 0.0326591 | 1        | 641  | 18 | 0.00928656 |
| 0.0692941 | 1        | 589  | 16 | 0.00515528 |
| 0.0691765 | 1        | 588  | 17 | 0.00932187 |
| 0.0744706 | 1        | 633  | 16 | 0.0084656  |
| 0.0708235 | 1        | 602  | 17 | 0.00919828 |
| 0.0756831 | 1        | 662  | 17 | 0.00868629 |
| 0.0960329 | 1        | 840  | 24 | 0.00926008 |
| 0.0691765 | 1        | 588  | 14 | 0.00762698 |
| 0.098943  | 1        | 908  | 20 | 0.00546424 |
| 0.106824  | 1        | 908  | 20 | 0.00546424 |
| 0.0714369 | 1        | 610  | 17 | 0.00807719 |
| 0.0485228 | 0.537267 | 966  | 27 | 0.00776822 |
| 0.0613879 | 1        | 966  | 27 | 0.00776822 |
| 0.0697457 | 1        | 746  | 21 | 0.0086245  |
| 0.0474072 | 1        | 746  | 21 | 0.0086245  |
| 0.118706  | 1        | 1009 | 28 | 0.00630285 |
| 0.0756401 | 1        | 644  | 17 | 0.00684133 |
| 0.0964843 | 1        | 977  | 22 | 0.00611748 |
| 0.0787004 | 1        | 671  | 19 | 0.00648823 |
| 0.0783787 | 1        | 671  | 19 | 0.00648823 |
| 0.0714873 | 1        | 609  | 17 | 0.0085627  |
| 0.0753657 | 1        | 644  | 17 | 0.00865981 |
| 0.0903452 | 1        | 772  | 22 | 0.00845677 |
| 0.0988235 | 1        | 840  | 23 | 0.00859801 |
| 0.0384586 | 1        | 1009 | 28 | 0.00849208 |
| 0.0226025 | 1        | 593  | 17 | 0.00794477 |
| 0.102342  | 1        | 874  | 25 | 0.00722092 |
| 0.103294  | 1        | 878  | 25 | 0.00762698 |
| 0.0792998 | 1        | 675  | 19 | 0.00805071 |
| 0.0393691 | 1        | 644  | 18 | 0.00926008 |

|           |          |      |    |            |
|-----------|----------|------|----|------------|
| 0.0695979 | 1        | 592  | 17 | 0.00767112 |
| 0.0708182 | 1        | 605  | 17 | 0.00794477 |
| 0.0956613 | 1        | 818  | 24 | 0.00839498 |
| 0.0962353 | 1        | 818  | 24 | 0.00839498 |
| 0.0743773 | 1        | 636  | 18 | 0.00766229 |
| 0.0748235 | 1        | 636  | 18 | 0.00766229 |
| 0.0581135 | 1        | 597  | 17 | 0.00835967 |
| 0.0695294 | 1        | 591  | 16 | 0.0092689  |
| 0.0270456 | 1        | 589  | 16 | 0.00774174 |
| 0.081996  | 1        | 700  | 19 | 0.00681485 |
| 0.112471  | 1        | 956  | 27 | 0.00827139 |
| 0.0746303 | 1        | 641  | 17 | 0.00464328 |
| 0.0789382 | 1        | 678  | 14 | 0.00687664 |
| 0.0424509 | 1        | 618  | 16 | 0.00805953 |
| 0.0680756 | 1        | 612  | 17 | 0.00814781 |
| 0.105059  | 1        | 893  | 24 | 0.00592327 |
| 0.0915278 | 1        | 780  | 18 | 0.00825374 |
| 0.112     | 1        | 952  | 23 | 0.00726506 |
| 0.0601176 | 1        | 511  | 15 | 0.00579086 |
| 0.0378156 | 1        | 635  | 18 | 0.00483749 |
| 0.035374  | 1        | 594  | 16 | 0.00821843 |
| 0.1       | 1        | 850  | 23 | 0.00790064 |
| 0.0972776 | 1        | 829  | 20 | 0.00840381 |
| 0.0689655 | 1        | 588  | 17 | 0.00898642 |
| 0.0996471 | 1        | 847  | 24 | 0.00827139 |
| 0.0718122 | 1        | 615  | 17 | 0.00964849 |
| 0.0690267 | 1        | 739  | 21 | 0.00624106 |
| 0.0585823 | 0.67659  | 739  | 21 | 0.00624106 |
| 0.0542686 | 1        | 581  | 16 | 0.0085627  |
| 0.012068  | 0.177281 | 581  | 16 | 0.0085627  |
| 0.0470417 | 0.960396 | 606  | 14 | 0.00738864 |
| 0.0752941 | 1        | 640  | 18 | 0.00888049 |
| 0.0805882 | 1        | 685  | 19 | 0.00722092 |
| 0.0550815 | 1        | 781  | 22 | 0.00759167 |
| 0.0623529 | 1        | 530  | 15 | 0.00791829 |
| 0.0104706 | 0.102064 | 872  | 24 | 0.00412246 |
| 0.129176  | 1        | 1098 | 26 | 0.00518176 |
| 0.109294  | 1        | 929  | 24 | 0.00796243 |
| 0.126301  | 1        | 1080 | 30 | 0.0072474  |
| 0.0937061 | 1        | 801  | 22 | 0.00833319 |
| 0.0606004 | 1        | 977  | 27 | 0.00721209 |
| 0.0176111 | 1        | 588  | 17 | 0.00671775 |
| 0.0685235 | 1        | 588  | 17 | 0.00671775 |
| 0.0211453 | 1        | 706  | 17 | 0.00778588 |
| 0.0822748 | 1        | 706  | 17 | 0.00778588 |
| 0.0828299 | 1        | 713  | 20 | 0.00786533 |
| 0.0812941 | 1        | 691  | 20 | 0.00867746 |

|           |   |      |    |            |
|-----------|---|------|----|------------|
| 0.0707059 | 1 | 601  | 17 | 0.00966614 |
| 0.0645882 | 1 | 549  | 16 | 0.00883636 |
| 0.0608235 | 1 | 517  | 14 | 0.00919828 |
| 0.105059  | 1 | 893  | 25 | 0.00587913 |
| 0.0743529 | 1 | 632  | 17 | 0.00731802 |
| 0.0505799 | 1 | 628  | 18 | 0.00766229 |
| 0.0792626 | 1 | 675  | 19 | 0.00880987 |
| 0.0697511 | 1 | 594  | 17 | 0.0095249  |
| 0.0459619 | 1 | 1083 | 27 | 0.00755636 |
| 0.0791999 | 1 | 685  | 19 | 0.0077594  |
| 0.0351462 | 1 | 590  | 16 | 0.00409597 |
| 0.0694036 | 1 | 590  | 16 | 0.00409597 |
| 0.0253788 | 1 | 598  | 17 | 0.00926008 |
| 0.138941  | 1 | 1181 | 33 | 0.00887167 |
| 0.0732708 | 1 | 625  | 14 | 0.00569376 |
| 0.0745628 | 1 | 695  | 15 | 0.00762698 |
| 0.0835681 | 1 | 712  | 20 | 0.00926008 |
| 0.044958  | 1 | 642  | 18 | 0.00818312 |
| 0.0342437 | 1 | 642  | 18 | 0.00818312 |
| 0.0700847 | 1 | 596  | 15 | 0.0092689  |
| 0.0729412 | 1 | 620  | 14 | 0.00781236 |
| 0.098     | 1 | 833  | 24 | 0.0076005  |
| 0.041009  | 1 | 608  | 17 | 0.00879222 |
| 0.0925882 | 1 | 787  | 21 | 0.00691195 |
| 0.0695294 | 1 | 591  | 17 | 0.00731802 |
| 0.0744706 | 1 | 633  | 18 | 0.00764464 |
| 0.121412  | 1 | 1032 | 29 | 0.00527003 |
| 0.0690588 | 1 | 587  | 17 | 0.00624106 |
| 0.068     | 1 | 578  | 16 | 0.00582617 |
| 0.110471  | 1 | 939  | 27 | 0.00736216 |
| 0.0729508 | 1 | 623  | 18 | 0.00796243 |
| 0.0461992 | 1 | 423  | 11 | 0.00813015 |
| 0.0672783 | 1 | 616  | 17 | 0.00899525 |
| 0.0412305 | 1 | 646  | 17 | 0.00695609 |
| 0.0812941 | 1 | 691  | 19 | 0.00797126 |
| 0.0769412 | 1 | 654  | 19 | 0.00779471 |
| 0.117176  | 1 | 996  | 27 | 0.00911001 |
| 0.0765461 | 1 | 656  | 19 | 0.00762698 |
| 0.0729412 | 1 | 620  | 17 | 0.00768878 |
| 0.104235  | 1 | 886  | 23 | 0.00546424 |
| 0.0871501 | 1 | 744  | 21 | 0.00822726 |
| 0.0665882 | 1 | 566  | 11 | 0.00937483 |
| 0.105176  | 1 | 894  | 25 | 0.00752105 |
| 0.0724824 | 1 | 619  | 17 | 0.00820077 |
| 0.0839578 | 1 | 717  | 20 | 0.00825374 |
| 0.0405857 | 1 | 643  | 15 | 0.00525238 |
| 0.0404479 | 1 | 643  | 15 | 0.00525238 |



|           |          |      |    |            |
|-----------|----------|------|----|------------|
| 0.0751262 | 1        | 640  | 15 | 0.00524355 |
| 0.0600701 | 1        | 754  | 15 | 0.00859801 |
| 0.0806087 | 1        | 927  | 25 | 0.00908353 |
| 0.0150588 | 0.127363 | 1005 | 28 | 0.00735333 |
| 0.0440388 | 1        | 427  | 12 | 0.00715913 |
| 0.0914433 | 1        | 778  | 22 | 0.00873042 |
| 0.0847989 | 1        | 757  | 20 | 0.00838615 |
| 0.0406225 | 1        | 616  | 17 | 0.00534065 |
| 0.0724706 | 1        | 616  | 17 | 0.00534065 |
| 0.0432604 | 1        | 656  | 17 | 0.00901291 |
| 0.0701176 | 1        | 596  | 17 | 0.00844794 |
| 0.0532206 | 1        | 856  | 24 | 0.00804188 |
| 0.0702951 | 1        | 598  | 17 | 0.0072474  |
| 0.0702703 | 1        | 598  | 17 | 0.00843912 |
| 0.0691765 | 1        | 588  | 17 | 0.00655885 |
| 0.0703529 | 1        | 598  | 17 | 0.00813015 |
| 0.0536471 | 1        | 456  | 13 | 0.00648823 |
| 0.0727059 | 1        | 618  | 17 | 0.00669127 |
| 0.0831765 | 1        | 707  | 20 | 0.00707968 |
| 0.0747946 | 1        | 692  | 18 | 0.00849208 |
| 0.0769412 | 1        | 654  | 19 | 0.00756519 |
| 0.111059  | 1        | 944  | 26 | 0.00763581 |
| 0.0863529 | 1        | 734  | 19 | 0.00547307 |
| 0.0473987 | 1        | 594  | 17 | 0.00998393 |
| 0.0684843 | 1        | 633  | 17 | 0.00821843 |
| 0.0707562 | 1        | 654  | 18 | 0.00527003 |
| 0.0729412 | 1        | 620  | 15 | 0.00920711 |
| 0.070454  | 1        | 599  | 17 | 0.00729154 |
| 0.082     | 1        | 697  | 20 | 0.00831553 |
| 0.0783529 | 1        | 666  | 19 | 0.00682368 |
| 0.0697158 | 1        | 596  | 17 | 0.00884518 |
| 0.0698824 | 1        | 594  | 17 | 0.00949842 |
| 0.0758021 | 1        | 645  | 18 | 0.00472273 |
| 0.0500067 | 1        | 747  | 15 | 0.0042019  |
| 0.0693367 | 1        | 599  | 16 | 0.00843912 |
| 0.0448778 | 1        | 619  | 11 | 0.00972794 |
| 0.0728235 | 1        | 619  | 11 | 0.00972794 |
| 0.0862353 | 1        | 733  | 19 | 0.00651472 |
| 0.0718542 | 1        | 615  | 18 | 0.00901291 |
| 0.12079   | 1        | 1058 | 28 | 0.00918063 |
| 0.0692895 | 1        | 590  | 12 | 0.00484631 |
| 0.0762184 | 1        | 649  | 19 | 0.00814781 |
| 0.0689412 | 1        | 586  | 13 | 0.00535831 |
| 0.0793816 | 1        | 688  | 16 | 0.00467859 |
| 0.0685073 | 1        | 598  | 17 | 0.00843029 |
| 0.0734118 | 1        | 624  | 18 | 0.00973676 |
| 0.090208  | 1        | 772  | 22 | 0.00783002 |

|           |   |      |    |            |
|-----------|---|------|----|------------|
| 0.0822353 | 1 | 699  | 20 | 0.00896877 |
| 0.0678419 | 1 | 635  | 18 | 0.00569376 |
| 0.115412  | 1 | 981  | 27 | 0.0081125  |
| 0.0845882 | 1 | 719  | 20 | 0.00562313 |
| 0.0762722 | 1 | 649  | 19 | 0.0073445  |
| 0.0840647 | 1 | 728  | 21 | 0.00617044 |
| 0.0853158 | 1 | 728  | 21 | 0.00617044 |
| 0.075738  | 1 | 644  | 18 | 0.00511997 |
| 0.060435  | 1 | 514  | 12 | 0.00789181 |
| 0.0466886 | 1 | 595  | 17 | 0.00661182 |
| 0.116824  | 1 | 993  | 28 | 0.00826257 |
| 0.0722353 | 1 | 614  | 17 | 0.00822726 |
| 0.0829725 | 1 | 709  | 20 | 0.0040077  |
| 0.0717647 | 1 | 610  | 17 | 0.00971911 |
| 0.0710135 | 1 | 611  | 17 | 0.00883636 |
| 0.0717642 | 1 | 611  | 17 | 0.00883636 |
| 0.0976864 | 1 | 836  | 19 | 0.00784767 |
| 0.104     | 1 | 884  | 21 | 0.00859801 |
| 0.0724688 | 1 | 627  | 18 | 0.00926008 |
| 0.116824  | 1 | 993  | 28 | 0.0085627  |
| 0.0754118 | 1 | 641  | 18 | 0.00879222 |
| 0.0719534 | 1 | 617  | 18 | 0.00530534 |
| 0.094001  | 1 | 1147 | 32 | 0.005323   |
| 0.0700682 | 1 | 596  | 17 | 0.00971911 |
| 0.0676612 | 1 | 576  | 15 | 0.00737099 |
| 0.0954955 | 1 | 848  | 23 | 0.00784767 |
| 0.0698824 | 1 | 594  | 17 | 0.00984269 |
| 0.0790545 | 1 | 699  | 20 | 0.00715913 |
| 0.0727294 | 1 | 619  | 12 | 0.00499638 |
| 0.0893402 | 1 | 761  | 22 | 0.00867746 |
| 0.120451  | 1 | 1026 | 28 | 0.00857153 |
| 0.136748  | 1 | 1164 | 32 | 0.00606451 |
| 0.0479594 | 1 | 624  | 17 | 0.00845677 |
| 0.0559527 | 1 | 728  | 21 | 0.00798891 |
| 0.0851661 | 1 | 728  | 21 | 0.00798891 |
| 0.0721637 | 1 | 617  | 18 | 0.00752988 |
| 0.0704324 | 1 | 601  | 17 | 0.00919828 |
| 0.0702639 | 1 | 599  | 17 | 0.00819195 |
| 0.0914668 | 1 | 820  | 23 | 0.00758285 |
| 0.082346  | 1 | 702  | 19 | 0.00775057 |
| 0.0944595 | 1 | 803  | 21 | 0.00646175 |
| 0.0765882 | 1 | 651  | 15 | 0.00753871 |
| 0.0750617 | 1 | 639  | 17 | 0.00869511 |
| 0.0703795 | 1 | 599  | 14 | 0.00640879 |
| 0.0828235 | 1 | 704  | 20 | 0.00721209 |
| 0.0875191 | 1 | 744  | 20 | 0.0080154  |
| 0.0473423 | 1 | 611  | 11 | 0.00822726 |

|           |          |      |    |            |
|-----------|----------|------|----|------------|
| 0.0566403 | 1        | 731  | 20 | 0.00488162 |
| 0.072     | 1        | 612  | 17 | 0.00661182 |
| 0.0717552 | 1        | 612  | 17 | 0.00661182 |
| 0.0852941 | 1        | 725  | 20 | 0.00721209 |
| 0.062934  | 1        | 725  | 20 | 0.00721209 |
| 0.0690255 | 1        | 595  | 15 | 0.00804188 |
| 0.0692415 | 1        | 597  | 12 | 0.00790946 |
| 0.0709049 | 1        | 619  | 15 | 0.00992214 |
| 0.0771031 | 1        | 659  | 17 | 0.00541128 |
| 0.0792941 | 1        | 674  | 18 | 0.0076005  |
| 0.0621439 | 1        | 578  | 16 | 0.00973676 |
| 0.0721176 | 1        | 613  | 16 | 0.00710616 |
| 0.0834202 | 1        | 720  | 20 | 0.00459914 |
| 0.0734561 | 1        | 634  | 17 | 0.00826257 |
| 0.0846947 | 1        | 731  | 21 | 0.00698257 |
| 0.0858824 | 1        | 730  | 20 | 0.00723857 |
| 0.075567  | 1        | 643  | 16 | 0.00595858 |
| 0.0337286 | 1        | 657  | 18 | 0.00680602 |
| 0.0310591 | 1        | 605  | 17 | 0.00969263 |
| 0.0749412 | 1        | 637  | 16 | 0.00753871 |
| 0.0975294 | 1        | 829  | 23 | 0.00721209 |
| 0.0688199 | 1        | 603  | 17 | 0.00784767 |
| 0.0511916 | 1        | 595  | 10 | 0.00883636 |
| 0.0698193 | 1        | 595  | 10 | 0.00883636 |
| 0.0713088 | 1        | 638  | 18 | 0.00424604 |
| 0.0818192 | 1        | 716  | 20 | 0.00805071 |
| 0.0734118 | 1        | 624  | 18 | 0.00723857 |
| 0.0568881 | 1        | 823  | 23 | 0.00790946 |
| 0.0583522 | 1        | 823  | 23 | 0.00790946 |
| 0.0377048 | 1        | 596  | 16 | 0.0082096  |
| 0.0636907 | 1        | 565  | 16 | 0.0071503  |
| 0.0666216 | 1        | 591  | 16 | 0.00896877 |
| 0.0622821 | 0.867314 | 618  | 11 | 0.00549072 |
| 0.0570588 | 0.78479  | 618  | 11 | 0.00549072 |
| 0.0897107 | 1        | 769  | 21 | 0.00617927 |
| 0.0668235 | 1        | 568  | 16 | 0.00531417 |
| 0.0764706 | 1        | 650  | 18 | 0.00629403 |
| 0.0818672 | 1        | 698  | 14 | 0.0084656  |
| 0.0721323 | 1        | 615  | 17 | 0.0080154  |
| 0.133054  | 1        | 1144 | 32 | 0.00768878 |
| 0.105839  | 1        | 910  | 22 | 0.00722092 |
| 0.096     | 1        | 816  | 22 | 0.00599389 |
| 0.0296474 | 1        | 544  | 15 | 0.00871277 |
| 0.0715294 | 1        | 608  | 17 | 0.00759167 |
| 0.10188   | 1        | 867  | 14 | 0.0057732  |
| 0.0812675 | 1        | 695  | 13 | 0.00485514 |
| 0.0755107 | 1        | 695  | 13 | 0.00485514 |

|           |          |      |    |            |
|-----------|----------|------|----|------------|
| 0.0770588 | 1        | 655  | 18 | 0.00472273 |
| 0.0702353 | 1        | 597  | 14 | 0.00865098 |
| 0.0693219 | 1        | 597  | 14 | 0.00865098 |
| 0.0703529 | 1        | 598  | 12 | 0.00793595 |
| 0.0750588 | 1        | 638  | 14 | 0.00756519 |
| 0.0694118 | 1        | 590  | 17 | 0.0088187  |
| 0.0190324 | 0.520259 | 617  | 16 | 0.00873925 |
| 0.0725882 | 1        | 617  | 16 | 0.00873925 |
| 0.074     | 1        | 629  | 18 | 0.00919828 |
| 0.0856782 | 1        | 746  | 21 | 0.00744161 |
| 0.111944  | 1        | 1001 | 28 | 0.00925125 |
| 0.0795124 | 1        | 711  | 16 | 0.00790064 |
| 0.120824  | 1        | 1027 | 29 | 0.00692961 |
| 0.0683529 | 1        | 581  | 16 | 0.0097809  |
| 0.0694705 | 1        | 593  | 17 | 0.00753871 |
| 0.0636898 | 1        | 542  | 16 | 0.00763581 |
| 0.0847182 | 1        | 729  | 20 | 0.00688547 |
| 0.0796242 | 1        | 678  | 14 | 0.00589679 |
| 0.071971  | 1        | 616  | 17 | 0.00971028 |
| 0.0712941 | 1        | 606  | 15 | 0.00790946 |
| 0.0832032 | 1        | 746  | 21 | 0.00592327 |
| 0.0574654 | 1        | 560  | 16 | 0.00909235 |
| 0.0702001 | 1        | 600  | 17 | 0.00752988 |
| 0.119765  | 1        | 1018 | 29 | 0.00664713 |
| 0.0716215 | 1        | 610  | 18 | 0.00926008 |
| 0.0762353 | 1        | 648  | 18 | 0.00411363 |
| 0.0892669 | 1        | 761  | 22 | 0.00888932 |
| 0.0729412 | 1        | 620  | 18 | 0.0085627  |
| 0.092     | 1        | 782  | 19 | 0.00544658 |
| 0.13098   | 1        | 1117 | 30 | 0.0078565  |
| 0.11257   | 1        | 960  | 26 | 0.00741512 |
| 0.0956471 | 1        | 813  | 22 | 0.00688547 |
| 0.101882  | 1        | 866  | 24 | 0.00466094 |
| 0.0846234 | 1        | 727  | 19 | 0.00871277 |
| 0.0724384 | 1        | 620  | 12 | 0.00784767 |
| 0.0887285 | 1        | 762  | 21 | 0.00491693 |
| 0.123661  | 1        | 1224 | 76 | 0.00855387 |
| 0.129319  | 1        | 1280 | 81 | 0.00859801 |
| 0.0604162 | 1        | 598  | 29 | 0.00990449 |
| 0.0729412 | 1        | 620  | 18 | 0.00980738 |
| 0.0848235 | 1        | 721  | 18 | 0.00642644 |
| 0.100081  | 1        | 985  | 71 | 0.00771526 |
| 0.0756665 | 1        | 667  | 19 | 0.00814781 |
| 0.0808674 | 1        | 951  | 27 | 0.00509348 |
| 0.0712625 | 1        | 613  | 14 | 0.0078565  |
| 0.0635294 | 1        | 540  | 11 | 0.00844794 |
| 0.0503015 | 1        | 684  | 19 | 0.00829788 |

|            |          |      |    |            |
|------------|----------|------|----|------------|
| 0.0429475  | 1        | 584  | 17 | 0.00817429 |
| 0.0798412  | 1        | 684  | 20 | 0.00668244 |
| 0.0720319  | 1        | 614  | 17 | 0.00899525 |
| 0.100711   | 1        | 992  | 28 | 0.00589679 |
| 0.074548   | 1        | 635  | 37 | 0.00928656 |
| 0.102062   | 1        | 871  | 19 | 0.00627637 |
| 0.0753698  | 1        | 642  | 35 | 0.00855387 |
| 0.0822963  | 1        | 701  | 49 | 0.00727388 |
| 0.0456688  | 1        | 591  | 17 | 0.00971028 |
| 0.117529   | 1        | 999  | 27 | 0.00723857 |
| 0.108353   | 1        | 921  | 26 | 0.00518176 |
| 0.0264706  | 0.243243 | 925  | 26 | 0.00852739 |
| 0.108301   | 1        | 925  | 26 | 0.00852739 |
| 0.119412   | 1        | 1015 | 29 | 0.00918063 |
| 0.118839   | 1        | 1015 | 29 | 0.00918063 |
| 0.113294   | 1        | 963  | 51 | 0.00909235 |
| 0.125176   | 1        | 1064 | 29 | 0.00876573 |
| 0.086      | 1        | 731  | 20 | 0.00817429 |
| 0.0888235  | 1        | 755  | 16 | 0.005323   |
| 0.06901    | 1        | 589  | 17 | 0.0096838  |
| 0.0640793  | 1        | 672  | 16 | 0.00745043 |
| 0.0841264  | 1        | 716  | 17 | 0.00735333 |
| 0.0415668  | 1        | 815  | 23 | 0.00743278 |
| 0.0719467  | 1        | 615  | 17 | 0.00977207 |
| 0.0854072  | 1        | 731  | 20 | 0.00730919 |
| 0.0714286  | 1        | 610  | 16 | 0.00596741 |
| 0.0225969  | 1        | 461  | 11 | 0.00743278 |
| 0.0981423  | 1        | 840  | 21 | 0.00669127 |
| 0.0169632  | 1        | 574  | 17 | 0.00752105 |
| 0.0112595  | 1        | 381  | 11 | 0.00868629 |
| 0.0226077  | 1        | 765  | 17 | 0.00527886 |
| 0.00990011 | 1        | 335  | 10 | 0.00821843 |
| 0.0291093  | 1        | 985  | 28 | 0.00528769 |
| 0.0166085  | 1        | 562  | 16 | 0.00519941 |
| 0.0166085  | 1        | 562  | 16 | 0.00879222 |
| 0.0175838  | 1        | 595  | 17 | 0.00784767 |
| 0.0244104  | 1        | 826  | 19 | 0.00736216 |
| 0.0332171  | 1        | 1124 | 32 | 0.00828022 |
| 0.0718824  | 1        | 611  | 17 | 0.0085627  |
| 0.0394163  | 1        | 597  | 17 | 0.00981621 |
| 0.0582671  | 1        | 616  | 17 | 0.00847443 |
| 0.0582858  | 1        | 899  | 25 | 0.00928656 |
| 0.0792559  | 1        | 899  | 25 | 0.00928656 |
| 0.0825337  | 1        | 1273 | 35 | 0.00749457 |
| 0.112228   | 1        | 1273 | 35 | 0.00749457 |
| 0.0415586  | 1        | 641  | 18 | 0.00894229 |
| 0.0565106  | 1        | 641  | 18 | 0.00894229 |

|           |          |      |    |            |
|-----------|----------|------|----|------------|
| 0.0859602 | 1        | 739  | 15 | 0.00597624 |
| 0.0694887 | 1        | 742  | 21 | 0.00794477 |
| 0.0704887 | 1        | 600  | 16 | 0.00587913 |
| 0.0557984 | 1        | 600  | 16 | 0.00899525 |
| 0.0768235 | 1        | 653  | 18 | 0.00675306 |
| 0.0801177 | 1        | 681  | 20 | 0.00620575 |
| 0.168846  | 1        | 1446 | 40 | 0.00726506 |
| 0.08734   | 1        | 812  | 22 | 0.00835967 |
| 0.0941452 | 1        | 804  | 22 | 0.00556134 |
| 0.0815168 | 1        | 804  | 22 | 0.00556134 |
| 0.0822063 | 1        | 699  | 19 | 0.00669127 |
| 0.0686116 | 1        | 595  | 17 | 0.00729154 |
| 0.0586152 | 1        | 513  | 10 | 0.0097809  |
| 0.044979  | 1        | 589  | 17 | 0.00930421 |
| 0.0688235 | 1        | 585  | 10 | 0.00517293 |
| 0.0718894 | 1        | 624  | 15 | 0.00871277 |
| 0.0659029 | 1        | 604  | 17 | 0.00806836 |
| 0.128235  | 1        | 1090 | 29 | 0.00759167 |
| 0.0836471 | 1        | 711  | 20 | 0.00838615 |
| 0.0836471 | 1        | 711  | 19 | 0.00595858 |
| 0.0686022 | 1        | 612  | 18 | 0.00716795 |
| 0.0583363 | 1        | 500  | 12 | 0.00906587 |
| 0.054721  | 1        | 969  | 27 | 0.00777705 |
| 0.0971765 | 1        | 826  | 23 | 0.00843912 |
| 0.0694477 | 1        | 591  | 17 | 0.00719444 |
| 0.0666291 | 1        | 591  | 17 | 0.00719444 |
| 0.0746041 | 1        | 636  | 16 | 0.0068943  |
| 0.105294  | 1        | 895  | 25 | 0.00526121 |
| 0.0892857 | 1        | 760  | 19 | 0.00743278 |
| 0.0703712 | 1        | 599  | 16 | 0.0086245  |
| 0.0787671 | 1        | 690  | 19 | 0.00975442 |
| 0.0705882 | 1        | 600  | 14 | 0.00988683 |
| 0.0696831 | 1        | 596  | 17 | 0.00519941 |
| 0.120941  | 1        | 1028 | 29 | 0.0070532  |
| 0.101176  | 1        | 860  | 23 | 0.00778588 |
| 0.0936435 | 1        | 797  | 21 | 0.005323   |
| 0.0703529 | 1        | 598  | 17 | 0.00889815 |
| 0.0797467 | 1        | 680  | 19 | 0.00712381 |
| 0.0704706 | 0.935938 | 640  | 18 | 0.00669127 |
| 0.0750588 | 1        | 638  | 18 | 0.00808601 |
| 0.117765  | 1        | 1001 | 28 | 0.00793595 |
| 0.0763529 | 1        | 649  | 16 | 0.00822726 |
| 0.0914118 | 1        | 777  | 22 | 0.00667361 |
| 0.112118  | 1        | 953  | 26 | 0.00692961 |
| 0.0836854 | 1        | 713  | 20 | 0.00761816 |
| 0.0844706 | 1        | 718  | 20 | 0.00587913 |
| 0.0752789 | 1        | 641  | 18 | 0.00759167 |

|           |          |      |    |            |
|-----------|----------|------|----|------------|
| 0.0771765 | 1        | 656  | 17 | 0.00861567 |
| 0.0729412 | 1        | 620  | 18 | 0.00535831 |
| 0.0754144 | 1        | 646  | 18 | 0.00733567 |
| 0.096269  | 1        | 836  | 24 | 0.00517293 |
| 0.0404706 | 1        | 344  | 10 | 0.00975442 |
| 0.0718824 | 1        | 611  | 14 | 0.00985152 |
| 0.0647654 | 1        | 570  | 16 | 0.00646175 |
| 0.0707996 | 1        | 603  | 17 | 0.00946311 |
| 0.0703529 | 1        | 598  | 17 | 0.00799774 |
| 0.0704391 | 1        | 600  | 11 | 0.00657651 |
| 0.0373126 | 0.535893 | 599  | 17 | 0.00808601 |
| 0.0366888 | 1        | 597  | 17 | 0.00998393 |
| 0.0674771 | 1        | 605  | 17 | 0.00749457 |
| 0.0897647 | 1        | 763  | 22 | 0.00817429 |
| 0.0983716 | 1        | 882  | 20 | 0.00763581 |
| 0.0669606 | 1        | 881  | 25 | 0.00669127 |
| 0.0882353 | 1        | 750  | 19 | 0.00470507 |
| 0.0694028 | 1        | 602  | 17 | 0.00971028 |
| 0.0700945 | 1        | 608  | 17 | 0.00527886 |
| 0.0705882 | 1        | 600  | 17 | 0.00620575 |
| 0.0438512 | 1        | 731  | 21 | 0.00796243 |
| 0.0848152 | 1        | 725  | 19 | 0.00719444 |
| 0.0689412 | 1        | 586  | 17 | 0.00899525 |
| 0.0701198 | 1        | 597  | 17 | 0.00813015 |
| 0.0599013 | 1        | 510  | 10 | 0.00899525 |
| 0.0776266 | 1        | 662  | 19 | 0.00648823 |
| 0.0536977 | 1        | 790  | 22 | 0.00402535 |
| 0.07233   | 1        | 619  | 16 | 0.00744161 |
| 0.0409132 | 1        | 586  | 16 | 0.00895111 |
| 0.0921176 | 1        | 783  | 22 | 0.00873925 |
| 0.072     | 1        | 612  | 17 | 0.00937483 |
| 0.0729412 | 1        | 620  | 18 | 0.0060292  |
| 0.0939258 | 1        | 818  | 23 | 0.00712381 |
| 0.0408926 | 0.427873 | 818  | 23 | 0.00712381 |
| 0.0887059 | 1        | 754  | 21 | 0.00693844 |
| 0.0418484 | 1        | 595  | 17 | 0.00774174 |
| 0.033971  | 1        | 483  | 14 | 0.00888049 |
| 0.0763    | 1        | 650  | 18 | 0.00634699 |
| 0.0726375 | 1        | 618  | 18 | 0.00966614 |
| 0.0255487 | 0.528596 | 577  | 16 | 0.00603803 |
| 0.067269  | 1        | 618  | 17 | 0.00950725 |
| 0.119223  | 1        | 1037 | 29 | 0.00550838 |
| 0.0760554 | 1        | 654  | 19 | 0.00745926 |
| 0.0195751 | 1        | 587  | 17 | 0.00474921 |
| 0.0206756 | 1        | 620  | 14 | 0.00585265 |
| 0.0801683 | 1        | 686  | 19 | 0.00505817 |
| 0.0854892 | 1        | 727  | 21 | 0.00698257 |

|           |   |      |    |            |
|-----------|---|------|----|------------|
| 0.0696427 | 1 | 610  | 17 | 0.00781236 |
| 0.0838166 | 1 | 766  | 22 | 0.00670892 |
| 0.0612941 | 1 | 521  | 10 | 0.00850091 |
| 0.0658715 | 1 | 602  | 16 | 0.00762698 |
| 0.0570559 | 1 | 600  | 17 | 0.0067354  |
| 0.0683616 | 1 | 605  | 17 | 0.00883636 |
| 0.0782345 | 1 | 670  | 19 | 0.00873925 |
| 0.0709412 | 1 | 603  | 16 | 0.00547307 |
| 0.0378173 | 1 | 587  | 16 | 0.00761816 |
| 0.0683432 | 1 | 587  | 16 | 0.00761816 |
| 0.068254  | 1 | 602  | 17 | 0.00715913 |
| 0.0711681 | 1 | 605  | 10 | 0.00681485 |
| 0.0719644 | 1 | 614  | 13 | 0.00745926 |
| 0.0971765 | 1 | 826  | 20 | 0.00729154 |
| 0.0741176 | 1 | 630  | 18 | 0.00747692 |
| 0.0811765 | 1 | 690  | 20 | 0.00814781 |
| 0.0724706 | 1 | 616  | 17 | 0.00871277 |
| 0.0699252 | 1 | 598  | 15 | 0.00505817 |
| 0.0875294 | 1 | 744  | 21 | 0.00914532 |
| 0.0597845 | 1 | 1021 | 24 | 0.00701788 |
| 0.0535191 | 1 | 914  | 26 | 0.00434314 |
| 0.072     | 1 | 612  | 17 | 0.00648823 |
| 0.0509412 | 1 | 433  | 11 | 0.00694727 |
| 0.0716369 | 1 | 614  | 17 | 0.00652354 |
| 0.0706166 | 1 | 615  | 17 | 0.00950725 |
| 0.0826097 | 1 | 704  | 20 | 0.00584382 |
| 0.0694945 | 1 | 598  | 12 | 0.00995745 |
| 0.106618  | 1 | 957  | 26 | 0.00880987 |
| 0.0797647 | 1 | 678  | 19 | 0.00845677 |
| 0.0696471 | 1 | 592  | 13 | 0.00935718 |
| 0.0801361 | 1 | 683  | 15 | 0.00560548 |
| 0.080268  | 1 | 683  | 15 | 0.00560548 |
| 0.112913  | 1 | 961  | 27 | 0.00453735 |
| 0.0642353 | 1 | 546  | 15 | 0.0078565  |
| 0.0737647 | 1 | 627  | 18 | 0.00777705 |
| 0.0723529 | 1 | 615  | 16 | 0.00919828 |
| 0.0776379 | 1 | 660  | 18 | 0.00895994 |
| 0.0708152 | 1 | 602  | 16 | 0.00526121 |
| 0.0697565 | 1 | 593  | 17 | 0.00798891 |
| 0.0783242 | 1 | 688  | 20 | 0.00929539 |
| 0.0697647 | 1 | 593  | 16 | 0.00833319 |
| 0.0593075 | 1 | 793  | 22 | 0.00759167 |
| 0.078445  | 1 | 793  | 22 | 0.00759167 |
| 0.0769902 | 1 | 706  | 20 | 0.00725623 |
| 0.0713866 | 1 | 607  | 17 | 0.00857153 |
| 0.103319  | 1 | 881  | 25 | 0.00647058 |
| 0.106235  | 1 | 903  | 22 | 0.00826257 |



|           |   |      |    |            |
|-----------|---|------|----|------------|
| 0.0733772 | 1 | 624  | 12 | 0.00510231 |
| 0.0248208 | 1 | 606  | 17 | 0.00945428 |
| 0.0711818 | 1 | 618  | 17 | 0.00965731 |
| 0.112588  | 1 | 957  | 26 | 0.0060292  |
| 0.0914944 | 1 | 1080 | 29 | 0.00659416 |
| 0.0812559 | 1 | 691  | 19 | 0.00486397 |
| 0.0747792 | 1 | 652  | 18 | 0.00465211 |
| 0.0482123 | 1 | 596  | 17 | 0.00680602 |
| 0.0699941 | 1 | 596  | 17 | 0.00680602 |
| 0.0706407 | 1 | 602  | 17 | 0.00977207 |
| 0.066614  | 1 | 590  | 17 | 0.00869511 |
| 0.067917  | 1 | 612  | 17 | 0.00838615 |
| 0.0710243 | 1 | 640  | 16 | 0.00793595 |
| 0.116049  | 1 | 987  | 27 | 0.00867746 |
| 0.0628302 | 1 | 987  | 27 | 0.00867746 |
| 0.0657467 | 1 | 586  | 16 | 0.00980738 |
| 0.0640093 | 1 | 660  | 15 | 0.00919828 |
| 0.0809412 | 1 | 688  | 20 | 0.00855387 |
| 0.0697647 | 1 | 593  | 17 | 0.00827139 |
| 0.0692001 | 1 | 590  | 17 | 0.00988683 |
| 0.0694118 | 1 | 590  | 17 | 0.00988683 |
| 0.062709  | 1 | 769  | 20 | 0.00749457 |
| 0.0574085 | 1 | 704  | 20 | 0.00840381 |
| 0.0191571 | 1 | 620  | 18 | 0.0085627  |
| 0.0190953 | 1 | 618  | 13 | 0.00745043 |
| 0.0303424 | 1 | 982  | 26 | 0.00551721 |
| 0.0227104 | 1 | 735  | 21 | 0.00505817 |
| 0.0670759 | 1 | 590  | 17 | 0.00837732 |
| 0.0215054 | 1 | 696  | 15 | 0.00518176 |
| 0.0666212 | 1 | 586  | 12 | 0.00545541 |
| 0.0714118 | 1 | 607  | 10 | 0.00711499 |
| 0.0688731 | 1 | 591  | 17 | 0.00745043 |
| 0.0680683 | 1 | 586  | 17 | 0.00698257 |
| 0.0364813 | 1 | 603  | 17 | 0.0065412  |
| 0.088     | 1 | 748  | 19 | 0.00920711 |
| 0.0690453 | 1 | 985  | 21 | 0.00833319 |
| 0.0889642 | 1 | 761  | 19 | 0.00683251 |
| 0.0832941 | 1 | 708  | 20 | 0.00833319 |
| 0.0801177 | 1 | 681  | 18 | 0.00526121 |
| 0.0695294 | 1 | 591  | 17 | 0.00966614 |
| 0.0695846 | 1 | 593  | 15 | 0.0061881  |
| 0.111529  | 1 | 948  | 22 | 0.00501404 |
| 0.0725401 | 1 | 620  | 18 | 0.00876573 |
| 0.0875716 | 1 | 780  | 22 | 0.00738864 |
| 0.110305  | 1 | 943  | 33 | 0.00813015 |
| 0.0584465 | 1 | 848  | 20 | 0.00561431 |
| 0.0767059 | 1 | 652  | 17 | 0.00719444 |

|           |   |     |    |            |
|-----------|---|-----|----|------------|
| 0.0609412 | 1 | 518 | 29 | 0.00995745 |
| 0.0837035 | 1 | 716 | 21 | 0.0056761  |
| 0.0423194 | 1 | 362 | 10 | 0.00745043 |
| 0.0417647 | 1 | 355 | 10 | 0.00919828 |

ACCEPTED MANUSCRIPT

| Fraction of negatively enriched windows in region | MAT-score on T(HETC vs. HETHF) |
|---------------------------------------------------|--------------------------------|
| 1                                                 | -4.01352                       |
| 1                                                 | -4.02308                       |
| 1                                                 | -4.02143                       |
| 0                                                 | 4.07831                        |
| 0                                                 | 4.20634                        |
| 1                                                 | -3.95537                       |
| 0                                                 | 3.97402                        |
| 0                                                 | 4.06865                        |
| 0                                                 | 4.02781                        |
| 0                                                 | 4.08547                        |
| 1                                                 | -4.00644                       |
| 1                                                 | -4.09453                       |
| 0                                                 | 4.0922                         |
| 0                                                 | 4.04263                        |
| 1                                                 | -4.14176                       |
| 0                                                 | 4.05053                        |
| 1                                                 | -3.97099                       |
| 1                                                 | -4.06227                       |
| 0                                                 | 4.22339                        |
| 0                                                 | 4.26052                        |
| 1                                                 | -4.1198                        |
| 1                                                 | -4.35159                       |
| 1                                                 | -4.51394                       |
| 1                                                 | -4.01274                       |
| 1                                                 | -4.01274                       |
| 0                                                 | 4.2115                         |
| 0                                                 | 4.2115                         |
| 1                                                 | -4.03848                       |
| 1                                                 | -4.08018                       |
| 1                                                 | -4.0636                        |
| 1                                                 | -4.33668                       |
| 1                                                 | -4.14719                       |
| 1                                                 | -4.3606                        |
| 1                                                 | -4.03952                       |
| 1                                                 | -4.14409                       |
| 0                                                 | 4.17989                        |
| 1                                                 | -4.34951                       |
| 1                                                 | -4.41089                       |
| 1                                                 | -4.11402                       |
| 0                                                 | 4.34597                        |
| 0                                                 | 4.12257                        |
| 0                                                 | 3.97783                        |
| 0                                                 | 4.0771                         |
| 0                                                 | 4.10253                        |

|   |          |
|---|----------|
| 1 | -4.09706 |
| 1 | -3.98994 |
| 1 | -3.973   |
| 1 | -4.10853 |
| 1 | -4.11591 |
| 1 | -4.06419 |
| 0 | 4.10599  |
| 1 | -4.17029 |
| 0 | 4.00306  |
| 1 | -4.07575 |
| 0 | 4.05494  |
| 1 | -4.27462 |
| 0 | 3.94948  |
| 1 | -4.21058 |
| 0 | 4.20189  |
| 0 | 4.33558  |
| 0 | 3.95299  |
| 0 | 4.28813  |
| 1 | -4.22565 |
| 0 | 4.14502  |
| 0 | 4.03012  |
| 1 | -4.05176 |
| 0 | 4.01279  |
| 1 | -4.12992 |
| 1 | -4.25826 |
| 1 | -4.23505 |
| 0 | 4.02375  |
| 0 | 4.03579  |
| 1 | -4.00497 |
| 1 | -4.07541 |
| 1 | -4.00534 |
| 1 | -4.08228 |
| 1 | -4.08228 |
| 1 | -4.17088 |
| 0 | 4.08887  |
| 0 | 4.02144  |
| 0 | 3.99537  |
| 0 | 4.32328  |
| 1 | -4.08969 |
| 1 | -4.12127 |
| 0 | 4.0334   |
| 0 | 4.23617  |
| 1 | -4.07373 |
| 1 | -3.97742 |
| 0 | 4.00787  |
| 0 | 4.00787  |
| 1 | -4.22718 |

|   |          |
|---|----------|
| 0 | 4.29216  |
| 0 | 4.04408  |
| 1 | -4.25629 |
| 0 | 4.15102  |
| 0 | 4.03194  |
| 1 | -4.07636 |
| 0 | 3.92368  |
| 1 | -3.99036 |
| 0 | 4.46145  |
| 1 | -4.00011 |
| 1 | -4.02341 |
| 1 | -4.09484 |
| 0 | 4.0391   |
| 1 | -3.94939 |
| 1 | -4.05571 |
| 0 | 4.13034  |
| 0 | 3.91763  |
| 0 | 4.07935  |
| 1 | -3.94732 |
| 1 | -4.31159 |
| 1 | -4.05656 |
| 1 | -4.02383 |
| 1 | -4.07444 |
| 0 | 4.13926  |
| 0 | 3.98292  |
| 0 | 3.92341  |
| 0 | 4.14763  |
| 1 | -4.04347 |
| 1 | -4.04347 |
| 0 | 4.16131  |
| 1 | -4.02531 |
| 1 | -4.15212 |
| 0 | 4.02656  |
| 0 | 4.027    |
| 1 | -4.20415 |
| 1 | -4.2847  |
| 1 | -4.38951 |
| 1 | -4.27049 |
| 1 | -4.01471 |
| 0 | 4.37722  |
| 1 | -4.13004 |
| 1 | -3.96692 |
| 1 | -4.15245 |
| 1 | -4.43355 |
| 1 | -4.16117 |
| 1 | -4.18273 |
| 1 | -4.44138 |

|   |          |
|---|----------|
| 1 | -4.00071 |
| 1 | -4.20976 |
| 1 | -4.02986 |
| 0 | 3.94885  |
| 1 | -4.07183 |
| 1 | -4.00983 |
| 0 | 4.45211  |
| 1 | -4.50843 |
| 1 | -4.23438 |
| 1 | -4.03602 |
| 1 | -4.03602 |
| 0 | 4.21258  |
| 0 | 4.09186  |
| 0 | 4.16189  |
| 1 | -4.08812 |
| 0 | 4.39596  |
| 1 | -4.16293 |
| 1 | -4.19035 |
| 1 | -4.12907 |
| 1 | -4.19658 |
| 1 | -4.27157 |
| 1 | -4.1005  |
| 1 | -4.1005  |
| 1 | -4.25644 |
| 0 | 4.09801  |
| 0 | 4.37447  |
| 0 | 4.18345  |
| 1 | -4.02652 |
| 0 | 4.39355  |
| 1 | -4.20229 |
| 1 | -4.25752 |
| 1 | -4.4447  |
| 0 | 3.98202  |
| 1 | -4.22145 |
| 1 | -4.13845 |
| 1 | -4.13845 |
| 1 | -3.95778 |
| 1 | -4.53221 |
| 1 | -4.53221 |
| 0 | 3.99848  |
| 1 | -3.97521 |
| 1 | -4.25862 |
| 1 | -4.31218 |
| 1 | -4.36646 |
| 0 | 4.05893  |
| 0 | 4.40667  |
| 0 | 4.01605  |

|   |          |
|---|----------|
| 0 | 3.95827  |
| 1 | -4.27606 |
| 0 | 4.16042  |
| 1 | -4.03559 |
| 0 | 4.18976  |
| 1 | -4.56491 |
| 0 | 4.02855  |
| 1 | -3.99503 |
| 1 | -4.0981  |
| 0 | 4.41906  |
| 0 | 4.16305  |
| 0 | 4.12976  |
| 1 | -4.32907 |
| 1 | -4.05372 |
| 1 | -4.21682 |
| 1 | -4.09515 |
| 1 | -4.57833 |
| 1 | -4.17196 |
| 0 | 4.1228   |
| 1 | -4.25601 |
| 1 | -3.96154 |
| 1 | -4.13615 |
| 1 | -3.97204 |
| 0 | 4.14178  |
| 1 | -4.4263  |
| 1 | -4.09083 |
| 1 | -3.95753 |
| 0 | 4.13268  |
| 0 | 4.00541  |
| 0 | 4.38064  |
| 1 | -4.00713 |
| 1 | -4.10911 |
| 1 | -3.96657 |
| 0 | 3.94228  |
| 0 | 4.43793  |
| 1 | -4.06351 |
| 1 | -4.11441 |
| 1 | -4.08455 |
| 1 | -4.02458 |
| 0 | 4.07448  |
| 1 | -4.12442 |
| 1 | -4.12411 |
| 1 | -4.2963  |
| 0 | 4.34644  |
| 0 | 3.91654  |
| 1 | -4.19337 |
| 0 | 4.01793  |

|   |          |
|---|----------|
| 0 | 4.05612  |
| 1 | -4.07451 |
| 1 | -4.25579 |
| 1 | -4.25579 |
| 1 | -4.08407 |
| 1 | -4.07646 |
| 1 | -4.40001 |
| 1 | -4.32734 |
| 1 | -4.28725 |
| 1 | -4.07513 |
| 0 | 4.09404  |
| 0 | 4.23091  |
| 0 | 4.03101  |
| 0 | 4.18811  |
| 1 | -4.01218 |
| 1 | -4.56747 |
| 1 | -4.38755 |
| 1 | -4.12034 |
| 1 | -4.15628 |
| 0 | 4.0591   |
| 1 | -3.98868 |
| 0 | 4.13654  |
| 1 | -4.0361  |
| 1 | -4.12851 |
| 1 | -3.996   |
| 1 | -4.32556 |
| 1 | -4.12659 |
| 1 | -4.19732 |
| 1 | -4.27779 |
| 1 | -4.12719 |
| 1 | -4.14897 |
| 1 | -4.15073 |
| 1 | -3.98464 |
| 0 | 4.10389  |
| 1 | -4.2945  |
| 0 | 4.29983  |
| 1 | -4.08802 |
| 1 | -3.9853  |
| 1 | -4.44207 |
| 0 | 4.07558  |
| 0 | 4.11851  |
| 1 | -3.99816 |
| 0 | 4.12717  |
| 1 | -4.07865 |
| 1 | -4.5593  |
| 0 | 4.11403  |
| 0 | 4.11523  |



|   |          |
|---|----------|
| 0 | 4.06103  |
| 0 | 4.25322  |
| 1 | -4.43193 |
| 0 | 4.31063  |
| 1 | -4.21832 |
| 1 | -4.53415 |
| 1 | -4.09141 |
| 1 | -4.04198 |
| 1 | -4.11525 |
| 0 | 4.15564  |
| 1 | -4.02738 |
| 1 | -4.0358  |
| 1 | -4.0358  |
| 1 | -3.97444 |
| 0 | 4.0658   |
| 0 | 4.4695   |
| 0 | 4.22399  |
| 1 | -4.08703 |
| 0 | 3.99421  |
| 1 | -4.1302  |
| 1 | -4.1635  |
| 0 | 4.42762  |
| 1 | -4.03497 |
| 0 | 4.09511  |
| 0 | 4.03444  |
| 1 | -3.97095 |
| 0 | 4.02708  |
| 0 | 4.28538  |
| 0 | 4.24474  |
| 1 | -4.33767 |
| 1 | -4.33767 |
| 1 | -4.15328 |
| 0 | 3.9294   |
| 1 | -4.00127 |
| 1 | -4.0403  |
| 1 | -3.95867 |
| 0 | 4.13652  |
| 0 | 4.1245   |
| 1 | -4.11086 |
| 0 | 4.22743  |
| 1 | -4.01094 |
| 1 | -3.96482 |
| 1 | -4.31581 |
| 0 | 4.01226  |
| 1 | -4.24818 |
| 1 | -4.11427 |
| 0 | 4.03936  |

|   |          |
|---|----------|
| 0 | 4.06577  |
| 1 | -4.41021 |
| 1 | -4.00728 |
| 1 | -4.07823 |
| 1 | -4.17378 |
| 1 | -4.22954 |
| 1 | -4.22954 |
| 1 | -4.12068 |
| 1 | -4.12068 |
| 1 | -4.01012 |
| 0 | 4.13404  |
| 1 | -4.24954 |
| 0 | 4.15779  |
| 1 | -4.08505 |
| 1 | -4.19075 |
| 0 | 4.09707  |
| 0 | 4.11804  |
| 0 | 4.38754  |
| 0 | 4.11639  |
| 0 | 4.13704  |
| 1 | -4.12581 |
| 0 | 3.94156  |
| 0 | 4.47752  |
| 0 | 4.21391  |
| 1 | -4.02365 |
| 1 | -4.03147 |
| 0 | 4.12457  |
| 0 | 4.04166  |
| 0 | 4.05156  |
| 1 | -4.24557 |
| 1 | -4.06423 |
| 1 | -4.31886 |
| 1 | -4.14109 |
| 0 | 4.01482  |
| 1 | -4.33462 |
| 1 | -4.36492 |
| 1 | -4.07549 |
| 1 | -4.25199 |
| 0 | 4.0417   |
| 1 | -4.12806 |
| 1 | -4.10016 |
| 0 | 4.23193  |
| 0 | 4.03415  |
| 0 | 4.03415  |
| 1 | -3.96011 |
| 1 | -4.26314 |
| 1 | -4.1098  |

|   |          |
|---|----------|
| 0 | 4.13154  |
| 1 | -3.95274 |
| 1 | -3.97207 |
| 0 | 4.44938  |
| 1 | -4.02855 |
| 1 | -4.10191 |
| 0 | 3.91694  |
| 1 | -4.50222 |
| 1 | -4.35191 |
| 1 | -4.0988  |
| 1 | -4.04915 |
| 1 | -4.04326 |
| 0 | 4.29344  |
| 1 | -4.05344 |
| 0 | 4.24865  |
| 1 | -4.07517 |
| 0 | 4.05784  |
| 1 | -4.25282 |
| 0 | 4.09764  |
| 1 | -4.07159 |
| 1 | -4.24016 |
| 0 | 4.02537  |
| 0 | 4.11999  |
| 0 | 3.91406  |
| 1 | -4.07018 |
| 1 | -4.1294  |
| 0 | 3.96301  |
| 1 | -4.04605 |
| 0 | 4.05743  |
| 1 | -4.47388 |
| 1 | -3.98309 |
| 1 | -4.16304 |
| 1 | -4.10843 |
| 1 | -4.10843 |
| 1 | -4.14274 |
| 1 | -4.14274 |
| 1 | -4.33247 |
| 1 | -4.34304 |
| 0 | 4.27685  |
| 0 | 3.93249  |
| 0 | 4.27406  |
| 0 | 4.18255  |
| 0 | 4.17534  |
| 0 | 4.12869  |
| 0 | 4.2416   |
| 1 | -4.00903 |
| 1 | -4.27942 |

|   |          |
|---|----------|
| 0 | 4.4356   |
| 1 | -4.0329  |
| 0 | 4.18875  |
| 0 | 4.47426  |
| 1 | -4.18291 |
| 0 | 3.92934  |
| 1 | -4.38607 |
| 0 | 4.08384  |
| 1 | -4.18023 |
| 1 | -4.11673 |
| 0 | 4.11625  |
| 0 | 4.08766  |
| 1 | -4.00461 |
| 1 | -4.2125  |
| 1 | -4.27731 |
| 0 | 4.0484   |
| 0 | 4.0214   |
| 1 | -4.02817 |
| 1 | -3.99883 |
| 0 | 4.13953  |
| 0 | 3.97329  |
| 0 | 4.12075  |
| 0 | 4.00741  |
| 1 | -4.01647 |
| 1 | -3.97211 |
| 0 | 4.02207  |
| 1 | -4.10517 |
| 1 | -4.37961 |
| 1 | -4.37961 |
| 0 | 4.15087  |
| 1 | -4.0487  |
| 0 | 4.25457  |
| 0 | 3.94479  |
| 0 | 3.94479  |
| 1 | -4.0825  |
| 1 | -4.27741 |
| 1 | -4.20814 |
| 1 | -4.20814 |
| 1 | -4.14819 |
| 1 | -4.14819 |
| 0 | 4.33125  |
| 1 | -4.15163 |
| 0 | 4.01246  |
| 1 | -4.09052 |
| 1 | -4.16949 |
| 0 | 4.08579  |
| 0 | 4.01632  |

|   |          |
|---|----------|
| 1 | -4.1925  |
| 0 | 3.93123  |
| 0 | 4.04347  |
| 0 | 3.96237  |
| 0 | 4.21942  |
| 1 | -4.40581 |
| 0 | 3.99601  |
| 0 | 3.95291  |
| 1 | -3.96795 |
| 0 | 3.93286  |
| 1 | -4.0122  |
| 0 | 4.03812  |
| 1 | -3.96013 |
| 1 | -4.43211 |
| 1 | -4.43211 |
| 0 | 4.21338  |
| 1 | -4.10638 |
| 1 | -3.96358 |
| 1 | -3.97006 |
| 1 | -4.35233 |
| 1 | -4.15001 |
| 1 | -3.981   |
| 1 | -4.07667 |
| 1 | -4.03651 |
| 1 | -4.10934 |
| 1 | -3.98966 |
| 1 | -4.13845 |
| 1 | -4.09378 |
| 1 | -4.06233 |
| 1 | -4.09648 |
| 0 | 3.99171  |
| 1 | -4.03278 |
| 0 | 4.27846  |
| 1 | -4.02326 |
| 1 | -3.9813  |
| 1 | -4.48334 |
| 0 | 4.06116  |
| 0 | 4.45117  |
| 0 | 4.03979  |
| 1 | -4.48168 |
| 0 | 4.1119   |
| 1 | -4.18969 |
| 1 | -4.11705 |
| 0 | 4.11087  |
| 1 | -4.06102 |
| 0 | 4.1352   |
| 0 | 4.03404  |

|   |          |
|---|----------|
| 1 | -4.35085 |
| 0 | 4.41203  |
| 0 | 4.30046  |
| 1 | -3.97653 |
| 1 | -4.26316 |
| 0 | 3.99147  |
| 1 | -4.05742 |
| 1 | -4.45971 |
| 1 | -4.05824 |
| 0 | 4.34133  |
| 1 | -3.97727 |
| 1 | -4.07452 |
| 1 | -4.28078 |
| 0 | 3.91817  |
| 0 | 4.06615  |
| 0 | 3.97471  |
| 0 | 4.12922  |
| 1 | -4.13735 |
| 1 | -4.20692 |
| 0 | 3.92737  |
| 1 | -4.18969 |
| 0 | 4.04226  |
| 1 | -4.17057 |
| 0 | 3.92623  |
| 1 | -3.95796 |
| 1 | -4.18287 |
| 1 | -4.00388 |
| 0 | 4.11945  |
| 1 | -4.03405 |
| 1 | -4.08973 |
| 1 | -4.07719 |
| 0 | 4.18066  |
| 0 | 4.18066  |
| 1 | -4.2273  |
| 1 | -4.2954  |
| 1 | -4.10216 |
| 1 | -4.14009 |
| 0 | 4.33114  |
| 1 | -4.00721 |
| 0 | 4.12208  |
| 1 | -4.04148 |
| 0 | 4.06141  |
| 0 | 4.06141  |
| 1 | -4.03667 |
| 0 | 4.30807  |
| 1 | -4.04046 |
| 0 | 4.06573  |

|   |          |
|---|----------|
| 0 | 4.41493  |
| 1 | -4.02091 |
| 1 | -3.99313 |
| 1 | -4.32492 |
| 1 | -4.04802 |
| 1 | -4.10843 |
| 1 | -4.16202 |
| 1 | -4.17444 |
| 1 | -4.00388 |
| 1 | -4.24684 |
| 1 | -4.06928 |
| 0 | 4.15792  |
| 1 | -4.0961  |
| 0 | 4.23158  |
| 1 | -4.02407 |
| 1 | -4.0351  |
| 0 | 4.32708  |
| 1 | -4.10125 |
| 1 | -4.28698 |
| 1 | -3.99889 |
| 1 | -4.17779 |
| 1 | -4.08752 |
| 0 | 4.073    |
| 0 | 4.44151  |
| 0 | 4.33422  |
| 0 | 4.12402  |
| 1 | -4.02467 |
| 0 | 4.44839  |
| 1 | -3.97675 |
| 1 | -4.05029 |
| 1 | -4.35366 |
| 1 | -4.05695 |
| 0 | 4.21065  |
| 1 | -4.11787 |
| 1 | -4.11787 |
| 1 | -4.13882 |
| 1 | -4.32676 |
| 1 | -4.3409  |
| 1 | -4.12431 |
| 1 | -4.22937 |
| 1 | -4.03816 |
| 0 | 4.42347  |
| 1 | -4.04861 |
| 0 | 4.32757  |
| 1 | -4.07206 |
| 0 | 4.03427  |
| 1 | -4.3147  |

|   |          |
|---|----------|
| 1 | -4.34211 |
| 0 | 4.02457  |
| 1 | -4.23237 |
| 1 | -4.11133 |
| 1 | -4.01351 |
| 0 | 4.05385  |
| 0 | 3.94012  |
| 1 | -4.03129 |
| 1 | -4.03129 |
| 0 | 4.05017  |
| 0 | 4.14863  |
| 1 | -3.99601 |
| 1 | -4.06319 |
| 1 | -4.06319 |
| 0 | 3.97859  |
| 1 | -4.08747 |
| 0 | 4.26958  |
| 0 | 4.43936  |
| 0 | 4.14789  |
| 1 | -4.02916 |
| 1 | -4.41775 |
| 0 | 3.95939  |
| 0 | 3.95939  |
| 1 | -4.2859  |
| 1 | -3.99546 |
| 1 | -4.0322  |
| 0 | 4.32549  |
| 1 | -4.04465 |
| 1 | -4.35383 |
| 1 | -4.35383 |
| 0 | 4.09499  |
| 1 | -4.12273 |
| 1 | -3.98771 |
| 1 | -4.36529 |
| 1 | -4.00432 |
| 1 | -3.96852 |
| 0 | 4.01717  |
| 1 | -4.14986 |
| 1 | -3.98624 |
| 1 | -3.96936 |
| 1 | -3.97333 |
| 1 | -4.14717 |
| 1 | -3.99954 |
| 1 | -4.1154  |
| 1 | -4.04612 |
| 1 | -4.04612 |
| 1 | -4.03935 |



|   |          |
|---|----------|
| 1 | -4.32174 |
| 1 | -4.14051 |
| 1 | -4.30231 |
| 0 | 4.28302  |
| 1 | -3.95823 |
| 0 | 4.1357   |
| 0 | 3.95145  |
| 1 | -4.11212 |
| 1 | -4.1694  |
| 0 | 4.15326  |
| 0 | 4.15326  |
| 1 | -4.1005  |
| 1 | -4.042   |
| 0 | 3.96766  |
| 0 | 4.35844  |
| 0 | 4.28226  |
| 1 | -4.41552 |
| 0 | 4.08675  |
| 1 | -4.14298 |
| 1 | -4.37531 |
| 1 | -4.02526 |
| 1 | -3.99446 |
| 1 | -3.96324 |
| 1 | -3.96324 |
| 0 | 4.12404  |
| 1 | -4.25538 |
| 0 | 4.43713  |
| 0 | 3.97482  |
| 1 | -4.0712  |
| 1 | -4.00342 |
| 0 | 3.95094  |
| 1 | -3.94793 |
| 0 | 4.01401  |
| 1 | -4.17648 |
| 1 | -4.29264 |
| 0 | 4.00779  |
| 0 | 4.04992  |
| 0 | 4.04992  |
| 0 | 4.19562  |
| 1 | -4.30265 |
| 1 | -4.03286 |
| 0 | 4.19495  |
| 1 | -3.96343 |
| 0 | 4.13973  |
| 0 | 4.20466  |
| 1 | -4.0509  |
| 1 | -4.44858 |

|   |          |
|---|----------|
| 1 | -4.06571 |
| 1 | -4.38329 |
| 1 | -4.16977 |
| 1 | -4.13053 |
| 0 | 3.94358  |
| 1 | -4.07778 |
| 1 | -4.13152 |
| 1 | -4.00129 |
| 1 | -4.21838 |
| 1 | -4.07725 |
| 0 | 3.96359  |
| 1 | -4.09532 |
| 1 | -4.30128 |
| 1 | -4.08174 |
| 1 | -4.1352  |
| 1 | -4.15821 |
| 1 | -4.06698 |
| 1 | -4.15618 |
| 1 | -4.43861 |
| 1 | -3.9785  |
| 1 | -4.06393 |
| 1 | -4.308   |
| 0 | 4.05705  |
| 0 | 4.05705  |
| 0 | 4.2307   |
| 0 | 4.34379  |
| 0 | 4.05135  |
| 1 | -4.12552 |
| 0 | 4.18349  |
| 1 | -4.016   |
| 0 | 4.09762  |
| 0 | 4.09762  |
| 1 | -3.95156 |
| 0 | 4.38948  |
| 1 | -4.05181 |
| 1 | -4.0351  |
| 1 | -4.03147 |
| 1 | -4.03147 |
| 1 | -4.02154 |
| 1 | -4.02154 |
| 1 | -4.28881 |
| 1 | -4.1436  |
| 1 | -3.96967 |
| 1 | -4.13465 |
| 1 | -4.1018  |
| 1 | -4.09279 |
| 0 | 3.99115  |

|   |          |
|---|----------|
| 1 | -4.13833 |
| 0 | 4.06021  |
| 1 | -4.0611  |
| 0 | 4.23714  |
| 0 | 4.42132  |
| 1 | -4.04269 |
| 1 | -3.95638 |
| 1 | -4.01218 |
| 1 | -4.08564 |
| 1 | -4.02886 |
| 0 | 4.47913  |
| 1 | -4.18686 |
| 0 | 4.05775  |
| 0 | 4.14449  |
| 0 | 4.14449  |
| 0 | 4.06151  |
| 1 | -4.03264 |
| 1 | -3.95065 |
| 0 | 4.15343  |
| 1 | -4.05598 |
| 0 | 4.29419  |
| 0 | 4.29802  |
| 1 | -4.35905 |
| 1 | -4.1704  |
| 1 | -4.1704  |
| 1 | -4.5632  |
| 0 | 4.40151  |
| 0 | 3.92576  |
| 1 | -4.55026 |
| 1 | -4.10449 |
| 1 | -3.95736 |
| 0 | 4.2362   |
| 1 | -4.22574 |
| 1 | -4.02747 |
| 0 | 4.06296  |
| 1 | -3.98263 |
| 0 | 3.97094  |
| 0 | 4.05102  |
| 1 | -4.07996 |
| 1 | -3.99161 |
| 1 | -3.95132 |
| 1 | -3.95132 |
| 1 | -4.4797  |
| 1 | -4.4797  |
| 1 | -4.05071 |
| 1 | -4.06095 |
| 1 | -4.18208 |

|   |          |
|---|----------|
| 0 | 4.02799  |
| 0 | 4.03431  |
| 1 | -4.13088 |
| 1 | -4.22441 |
| 0 | 4.00058  |
| 1 | -4.01277 |
| 1 | -4.07613 |
| 0 | 4.06418  |
| 0 | 4.06418  |
| 0 | 4.43002  |
| 0 | 4.43002  |
| 1 | -4.11502 |
| 1 | -4.29782 |
| 1 | -4.11924 |
| 0 | 3.92527  |
| 0 | 4.10354  |
| 0 | 4.10497  |
| 0 | 4.4741   |
| 0 | 4.20468  |
| 1 | -4.17033 |
| 1 | -4.15234 |
| 0 | 4.01564  |
| 0 | 4.07276  |
| 1 | -4.27164 |
| 1 | -3.96876 |
| 1 | -4.22337 |
| 1 | -4.39806 |
| 1 | -4.01296 |
| 1 | -4.02275 |
| 1 | -4.19008 |
| 1 | -4.00435 |
| 0 | 4.11526  |
| 0 | 3.92163  |
| 1 | -4.33932 |
| 1 | -4.07543 |
| 0 | 3.96861  |
| 1 | -4.07808 |
| 1 | -4.27504 |
| 1 | -4.00578 |
| 0 | 4.2371   |
| 1 | -4.14952 |
| 1 | -3.98792 |
| 1 | -4.15954 |
| 1 | -4.13785 |
| 1 | -4.51207 |
| 1 | -3.95208 |
| 1 | -4.06772 |

|   |          |
|---|----------|
| 1 | -4.0236  |
| 1 | -4.0236  |
| 1 | -4.55466 |
| 1 | -4.29433 |
| 1 | -4.20312 |
| 1 | -3.97829 |
| 1 | -4.0101  |
| 1 | -4.44759 |
| 0 | 4.0585   |
| 0 | 4.05388  |
| 1 | -4.18107 |
| 1 | -3.96408 |
| 1 | -4.18142 |
| 1 | -4.124   |
| 1 | -3.98118 |
| 1 | -4.09318 |
| 1 | -3.99192 |
| 1 | -4.52713 |
| 1 | -3.97005 |
| 1 | -4.0121  |
| 1 | -4.03117 |
| 0 | 4.06147  |
| 0 | 4.15157  |
| 0 | 4.23586  |
| 1 | -4.47327 |
| 1 | -4.34461 |
| 0 | 4.04624  |
| 1 | -4.03013 |
| 1 | -4.03013 |
| 1 | -4.12077 |
| 0 | 4.24818  |
| 0 | 4.04721  |
| 1 | -4.06893 |
| 1 | -4.05012 |
| 1 | -4.07398 |
| 0 | 4.396    |
| 0 | 4.06789  |
| 1 | -4.03084 |
| 1 | -3.948   |
| 0 | 4.09775  |
| 1 | -4.03732 |
| 0 | 4.22143  |
| 1 | -4.05092 |
| 1 | -4.03527 |
| 0 | 4.30913  |
| 1 | -4.06535 |
| 1 | -4.52768 |

|   |          |
|---|----------|
| 0 | 3.94618  |
| 1 | -4.43961 |
| 0 | 4.13741  |
| 0 | 4.31895  |
| 1 | -4.3705  |
| 1 | -4.3705  |
| 1 | -4.08829 |
| 1 | -4.00222 |
| 1 | -3.95468 |
| 1 | -4.24395 |
| 0 | 3.9951   |
| 1 | -3.98286 |
| 0 | 4.41149  |
| 1 | -4.08993 |
| 0 | 4.14201  |
| 1 | -4.4141  |
| 1 | -4.01333 |
| 0 | 4.09038  |
| 1 | -4.29284 |
| 0 | 4.34218  |
| 1 | -4.30443 |
| 0 | 4.10569  |
| 0 | 4.11618  |
| 1 | -4.07431 |
| 0 | 4.19107  |
| 0 | 4.12805  |
| 1 | -3.99376 |
| 1 | -4.17813 |
| 0 | 3.94102  |
| 1 | -4.17382 |
| 0 | 4.32262  |
| 1 | -4.17918 |
| 1 | -4.10207 |
| 1 | -4.09207 |
| 0 | 4.37937  |
| 0 | 4.25128  |
| 0 | 4.1397   |
| 0 | 4.41027  |
| 1 | -4.04748 |
| 0 | 4.00788  |
| 0 | 4.20588  |
| 0 | 4.18776  |
| 0 | 4.1328   |
| 0 | 4.17626  |
| 0 | 4.29606  |
| 0 | 3.96335  |
| 1 | -4.38173 |

|   |          |
|---|----------|
| 1 | -4.5732  |
| 1 | -4.22499 |
| 1 | -4.34659 |
| 1 | -4.34659 |
| 1 | -4.04633 |
| 0 | 4.05249  |
| 1 | -4.01875 |
| 1 | -4.00838 |
| 1 | -4.27529 |
| 1 | -4.2251  |
| 1 | -4.57851 |
| 1 | -4.12728 |
| 1 | -4.22153 |
| 1 | -4.12482 |
| 0 | 4.14333  |
| 1 | -4.55204 |
| 1 | -4.55204 |
| 1 | -4.16191 |
| 1 | -3.95485 |
| 1 | -4.12158 |
| 0 | 4.21337  |
| 0 | 4.11625  |
| 1 | -4.23055 |
| 1 | -4.23055 |
| 1 | -4.1502  |
| 1 | -4.1502  |
| 1 | -4.26981 |
| 1 | -4.26981 |
| 1 | -4.12738 |
| 1 | -4.1296  |
| 0 | 4.09543  |
| 1 | -4.16171 |
| 0 | 4.32317  |
| 0 | 4.2789   |
| 0 | 4.03404  |
| 1 | -4.08537 |
| 1 | -4.05238 |
| 1 | -4.05238 |
| 1 | -4.09398 |
| 1 | -4.09398 |
| 0 | 3.94631  |
| 0 | 4.19413  |
| 0 | 4.10055  |
| 1 | -4.15346 |
| 1 | -4.12132 |
| 1 | -4.12132 |
| 1 | -4.27889 |

|   |          |
|---|----------|
| 1 | -4.27444 |
| 1 | -3.99556 |
| 1 | -3.99556 |
| 0 | 4.03083  |
| 1 | -4.38713 |
| 0 | 3.97974  |
| 0 | 3.95224  |
| 1 | -4.26571 |
| 1 | -4.26571 |
| 1 | -3.98096 |
| 0 | 4.06889  |
| 1 | -4.0031  |
| 0 | 3.97162  |
| 0 | 4.06626  |
| 0 | 4.23452  |
| 0 | 4.23206  |
| 1 | -4.25953 |
| 0 | 4.17074  |
| 1 | -4.00439 |
| 1 | -4.02419 |
| 0 | 4.09311  |
| 1 | -4.45713 |
| 1 | -4.17715 |
| 0 | 4.09458  |
| 0 | 4.26722  |
| 1 | -4.14309 |
| 0 | 4.00448  |
| 0 | 4.16956  |
| 0 | 4.45042  |
| 0 | 4.0159   |
| 0 | 4.14021  |
| 1 | -4.02268 |
| 1 | -4.29904 |
| 1 | -4.24508 |
| 0 | 4.23388  |
| 0 | 4.01617  |
| 1 | -4.27205 |
| 1 | -4.47666 |
| 0 | 4.0849   |
| 1 | -4.26829 |
| 1 | -4.3134  |
| 0 | 4.12737  |
| 1 | -4.17397 |
| 1 | -4.01987 |
| 0 | 4.01861  |
| 0 | 4.00515  |
| 1 | -4.03562 |



|   |          |
|---|----------|
| 1 | -4.13065 |
| 1 | -4.0353  |
| 0 | 4.28345  |
| 1 | -4.26359 |
| 0 | 4.11493  |
| 0 | 4.11493  |
| 1 | -4.05447 |
| 1 | -4.05447 |
| 0 | 4.04743  |
| 1 | -4.26295 |
| 1 | -4.23931 |
| 1 | -4.23931 |
| 1 | -4.03979 |
| 1 | -4.43797 |
| 1 | -4.43797 |
| 1 | -4.12791 |
| 1 | -4.09625 |
| 1 | -4.10014 |
| 1 | -4.10014 |
| 0 | 4.30735  |
| 0 | 4.11181  |
| 0 | 4.11181  |
| 1 | -3.99795 |
| 1 | -3.99795 |
| 0 | 4.12825  |
| 1 | -3.98122 |
| 1 | -4.3338  |
| 0 | 4.04714  |
| 1 | -4.01902 |
| 0 | 4.00633  |
| 0 | 4.06368  |
| 0 | 4.11924  |
| 1 | -4.10141 |
| 0 | 4.00573  |
| 0 | 4.00573  |
| 0 | 4.08322  |
| 0 | 4.08322  |
| 1 | -4.27391 |
| 1 | -4.27391 |
| 0 | 4.07826  |
| 0 | 4.21672  |
| 0 | 4.47471  |
| 1 | -4.19375 |
| 1 | -4.19375 |
| 1 | -4.16793 |
| 1 | -4.22883 |
| 1 | -4.19824 |

|   |          |
|---|----------|
| 1 | -4.17324 |
| 0 | 3.93892  |
| 0 | 3.93892  |
| 1 | -4.40101 |
| 0 | 4.00051  |
| 0 | 4.13362  |
| 0 | 4.03131  |
| 0 | 4.03503  |
| 0 | 4.40682  |
| 0 | 4.41297  |
| 0 | 4.21954  |
| 1 | -4.0862  |
| 0 | 4.40146  |
| 0 | 4.22185  |
| 0 | 4.02169  |
| 0 | 3.92015  |
| 0 | 4.17695  |
| 0 | 4.13638  |
| 0 | 3.91933  |
| 0 | 4.11685  |
| 0 | 4.06343  |
| 1 | -4.25762 |
| 0 | 4.08586  |
| 0 | 4.40378  |
| 0 | 4.14045  |
| 1 | -4.02789 |
| 1 | -3.97965 |
| 0 | 4.4319   |
| 0 | 3.97575  |
| 1 | -4.38313 |
| 0 | 3.93166  |
| 0 | 4.12315  |
| 0 | 3.95523  |
| 1 | -3.95386 |
| 1 | -3.96527 |
| 0 | 3.94225  |
| 0 | 4.39516  |
| 0 | 3.9752   |
| 1 | -4.55756 |
| 1 | -3.97113 |
| 1 | -4.54523 |
| 0 | 4.46221  |
| 1 | -4.08212 |
| 1 | -4.3464  |
| 0 | 4.12912  |
| 0 | 4.24347  |
| 1 | -4.21938 |

|   |          |
|---|----------|
| 1 | -3.99103 |
| 0 | 4.40184  |
| 0 | 4.12607  |
| 0 | 4.15027  |
| 0 | 4.39798  |
| 0 | 4.46077  |
| 1 | -4.29643 |
| 0 | 3.99861  |
| 0 | 4.04681  |
| 1 | -3.97724 |
| 0 | 4.1913   |
| 0 | 4.06571  |
| 1 | -4.45676 |
| 1 | -4.45676 |
| 0 | 4.43623  |
| 1 | -4.16544 |
| 1 | -4.40647 |
| 0 | 3.95636  |
| 0 | 4.40425  |
| 1 | -4.14651 |
| 0 | 4.05858  |
| 1 | -4.14379 |
| 0 | 4.20503  |
| 0 | 3.94857  |
| 0 | 4.14393  |
| 1 | -3.97767 |
| 0 | 4.11684  |
| 0 | 4.08697  |
| 1 | -4.317   |
| 1 | -4.4413  |
| 0 | 4.13982  |
| 1 | -4.02238 |
| 1 | -4.46959 |
| 1 | -4.29118 |
| 1 | -3.99607 |
| 0 | 4.30385  |
| 0 | 4.35552  |
| 0 | 4.40786  |
| 0 | 4.01411  |
| 0 | 4.42618  |
| 0 | 4.12393  |
| 1 | -4.1449  |
| 1 | -4.14743 |
| 1 | -4.16684 |
| 1 | -3.97184 |
| 1 | -4.18524 |
| 1 | -4.18524 |

|   |          |
|---|----------|
| 1 | -4.35652 |
| 0 | 4.44284  |
| 1 | -4.03524 |
| 1 | -4.01024 |
| 0 | 4.25316  |
| 1 | -4.25055 |
| 1 | -4.31361 |
| 1 | -4.19694 |
| 1 | -4.08411 |
| 0 | 4.15938  |
| 1 | -4.43876 |
| 0 | 4.14741  |
| 1 | -4.00214 |
| 1 | -4.06468 |
| 0 | 4.13008  |
| 0 | 4.01346  |
| 1 | -4.23135 |
| 0 | 4.15775  |
| 1 | -4.2754  |
| 0 | 4.17698  |
| 0 | 4.36045  |
| 1 | -4.04857 |
| 0 | 4.09704  |
| 0 | 3.91423  |
| 0 | 4.07027  |
| 0 | 4.25579  |
| 1 | -4.16053 |
| 1 | -4.203   |
| 1 | -4.203   |
| 1 | -4.05685 |
| 0 | 4.03233  |
| 0 | 4.03233  |
| 1 | -4.39007 |
| 1 | -4.39007 |
| 1 | -4.01988 |
| 1 | -4.01988 |
| 1 | -4.2029  |
| 1 | -4.2029  |
| 0 | 4.14311  |
| 0 | 4.11285  |
| 0 | 4.28173  |
| 1 | -4.27139 |
| 0 | 4.12755  |
| 1 | -4.24718 |
| 0 | 4.01272  |
| 0 | 4.10943  |
| 1 | -4.01178 |

|   |          |
|---|----------|
| 0 | 4.3537   |
| 1 | -3.94702 |
| 1 | -4.36603 |
| 1 | -4.01726 |
| 0 | 4.02286  |
| 1 | -4.04795 |
| 0 | 3.92035  |
| 1 | -4.46002 |
| 0 | 3.99914  |
| 1 | -4.33163 |
| 1 | -4.03241 |
| 1 | -4.47495 |
| 0 | 3.94815  |
| 0 | 4.09623  |
| 1 | -4.184   |
| 1 | -4.03264 |
| 0 | 4.06836  |
| 0 | 4.48053  |
| 0 | 4.01576  |
| 1 | -4.06243 |
| 0 | 4.17523  |
| 0 | 4.04006  |
| 0 | 3.96514  |
| 0 | 4.01016  |
| 0 | 4.00672  |
| 0 | 4.21048  |
| 0 | 4.017    |
| 0 | 4.27378  |
| 1 | -4.11496 |
| 0 | 4.15889  |
| 1 | -4.26011 |
| 1 | -4.03481 |
| 1 | -4.0709  |
| 1 | -4.16694 |
| 0 | 4.27083  |
| 0 | 3.95317  |
| 0 | 4.01068  |
| 0 | 3.94584  |
| 1 | -4.11534 |
| 0 | 4.31947  |
| 0 | 3.97656  |
| 0 | 4.16506  |
| 0 | 3.91448  |
| 1 | -4.0019  |
| 0 | 4.06252  |
| 0 | 4.03784  |
| 0 | 3.915    |

|   |          |
|---|----------|
| 1 | -4.10209 |
| 1 | -4.17113 |
| 1 | -4.05861 |
| 1 | -4.07981 |
| 1 | -3.99518 |
| 1 | -4.13291 |
| 1 | -4.14554 |
| 0 | 4.03893  |
| 1 | -4.15338 |
| 1 | -4.05022 |
| 1 | -4.24338 |
| 1 | -4.10553 |
| 0 | 3.9162   |
| 1 | -4.48226 |
| 0 | 4.21082  |
| 0 | 4.06278  |
| 0 | 3.95674  |
| 0 | 4.40857  |
| 1 | -4.04403 |
| 1 | -4.40783 |
| 1 | -4.07506 |
| 0 | 4.17253  |
| 1 | -4.10266 |
| 0 | 4.23974  |
| 0 | 4.26683  |
| 1 | -3.96927 |
| 1 | -4.2832  |
| 0 | 4.28159  |
| 0 | 3.97372  |
| 0 | 3.94369  |
| 1 | -3.954   |
| 1 | -4.11481 |
| 1 | -4.11481 |
| 1 | -4.34117 |
| 0 | 3.91378  |
| 1 | -4.35794 |
| 1 | -4.0792  |
| 1 | -4.03288 |
| 1 | -4.55361 |
| 1 | -4.55361 |
| 1 | -4.1118  |
| 1 | -4.0888  |
| 1 | -4.46401 |
| 1 | -4.46401 |
| 0 | 4.07774  |
| 0 | 4.07774  |
| 1 | -4.05104 |

|   |          |
|---|----------|
| 1 | -4.05104 |
| 0 | 4.06798  |
| 1 | -4.02907 |
| 1 | -4.14369 |
| 1 | -3.95996 |
| 0 | 4.48623  |
| 0 | 3.97912  |
| 0 | 4.14693  |
| 1 | -4.15392 |
| 1 | -4.10994 |
| 0 | 4.36728  |
| 1 | -4.02357 |
| 1 | -4.1274  |
| 0 | 4.45454  |
| 1 | -3.99907 |
| 0 | 4.23864  |
| 1 | -4.01467 |
| 1 | -4.0269  |
| 0 | 4.30544  |
| 1 | -4.06999 |
| 0 | 3.93501  |
| 1 | -4.1787  |
| 1 | -4.41958 |
| 0 | 4.00498  |
| 1 | -4.2484  |
| 1 | -4.2484  |
| 0 | 4.07799  |
| 1 | -4.17254 |
| 0 | 4.19121  |
| 1 | -4.17432 |
| 1 | -3.97867 |
| 1 | -4.47693 |
| 0 | 3.9832   |
| 1 | -3.95855 |
| 1 | -3.95149 |
| 1 | -4.00499 |
| 1 | -4.05075 |
| 1 | -4.0858  |
| 0 | 4.07222  |
| 0 | 4.09808  |
| 0 | 4.10163  |
| 0 | 3.95081  |
| 1 | -4.174   |
| 0 | 3.94858  |
| 0 | 4.05432  |
| 0 | 4.18709  |
| 1 | -4.00869 |

|          |          |
|----------|----------|
| 1        | -4.17227 |
| 0        | 4.1643   |
| 1        | -4.10956 |
| 0        | 4.04537  |
| 1        | -4.34287 |
| 1        | -3.95436 |
| 0        | 3.97164  |
| 0        | 4.26622  |
| 0        | 4.33023  |
| 1        | -4.14277 |
| 1        | -4.09579 |
| 1        | -4.07816 |
| 1        | -4.04828 |
| 1        | -4.05257 |
| 1        | -4.04833 |
| 1        | -4.09121 |
| 0        | 4.00684  |
| 0        | 4.1837   |
| 1        | -4.1525  |
| 1        | -4.16208 |
| 1        | -4.23465 |
| 1        | -4.07185 |
| 1        | -4.19627 |
| 1        | -3.95946 |
| 1        | -4.28724 |
| 0        | 4.19578  |
| 0        | 3.91544  |
| 0        | 4.04735  |
| 1        | -4.00979 |
| 1        | -3.95334 |
| 1        | -4.16864 |
| 1        | -4.05081 |
| 1        | -4.05081 |
| 1        | -4.0173  |
| 1        | -4.26998 |
| 1        | -4.08994 |
| 0.363636 | -4.01535 |
| 0        | 3.95755  |
| 0        | 4.20051  |
| 0        | 4.10424  |
| 0        | 4.10965  |
| 1        | -4.20362 |
| 1        | -4.17034 |
| 1        | -4.4782  |
| 1        | -3.95788 |
| 1        | -4.07602 |
| 1        | -4.07602 |



|   |          |
|---|----------|
| 1 | -4.18743 |
| 0 | 4.10229  |
| 1 | -4.16697 |
| 1 | -4.03045 |
| 1 | -4.03045 |
| 1 | -4.25633 |
| 0 | 4.03018  |
| 1 | -4.0494  |
| 0 | 3.94245  |
| 1 | -4.14739 |
| 1 | -4.3543  |
| 1 | -4.08347 |
| 1 | -4.05783 |
| 1 | -4.07771 |
| 0 | 4.4088   |
| 0 | 4.08836  |
| 0 | 4.01947  |
| 1 | -4.41405 |
| 1 | -4.03198 |
| 0 | 3.94683  |
| 0 | 4.02302  |
| 1 | -4.10877 |
| 1 | -3.97097 |
| 0 | 4.37957  |
| 1 | -4.01965 |
| 0 | 4.12633  |
| 0 | 4.01327  |
| 0 | 4.24233  |
| 0 | 4.05418  |
| 0 | 4.18095  |
| 0 | 4.03214  |
| 0 | 4.01433  |
| 1 | -4.19826 |
| 0 | 4.25119  |
| 0 | 4.40623  |
| 0 | 4.07287  |
| 0 | 4.33101  |
| 0 | 4.0104   |
| 0 | 3.96562  |
| 1 | -4.36143 |
| 0 | 4.09779  |
| 1 | -4.21602 |
| 1 | -4.21602 |
| 1 | -4.21528 |
| 0 | 4.04205  |
| 0 | 4.12067  |
| 1 | -4.07429 |

|   |          |
|---|----------|
| 1 | -4.03414 |
| 1 | -4.36725 |
| 1 | -4.04299 |
| 0 | 3.92251  |
| 1 | -4.00418 |
| 1 | -4.27326 |
| 1 | -4.13436 |
| 1 | -4.13436 |
| 1 | -4.08118 |
| 1 | -4.08118 |
| 1 | -4.49237 |
| 1 | -4.07546 |
| 1 | -4.07546 |
| 0 | 4.23654  |
| 0 | 4.2724   |
| 1 | -4.29713 |
| 0 | 4.03725  |
| 1 | -4.18264 |
| 1 | -4.18264 |
| 1 | -3.95936 |
| 0 | 4.15084  |
| 1 | -3.9914  |
| 0 | 4.00177  |
| 1 | -4.05876 |
| 1 | -4.10752 |
| 0 | 4.18085  |
| 0 | 4.24778  |
| 1 | -4.14403 |
| 0 | 4.03553  |
| 1 | -4.02114 |
| 1 | -4.04776 |
| 1 | -4.05787 |
| 1 | -4.00382 |
| 0 | 4.11198  |
| 1 | -4.03366 |
| 1 | -4.3697  |
| 1 | -4.3697  |
| 1 | -4.1077  |
| 0 | 3.97723  |
| 0 | 3.97723  |
| 0 | 4.19449  |
| 0 | 4.28815  |
| 0 | 3.91379  |
| 0 | 4.11709  |
| 0 | 4.21333  |
| 0 | 3.92861  |
| 1 | -4.25839 |

|   |          |
|---|----------|
| 1 | -4.4088  |
| 1 | -4.4088  |
| 1 | -4.07578 |
| 0 | 4.1975   |
| 1 | -3.95287 |
| 0 | 4.39128  |
| 1 | -4.44794 |
| 1 | -4.10416 |
| 1 | -4.15834 |
| 0 | 4.21421  |
| 1 | -4.12545 |
| 1 | -4.07687 |
| 1 | -4.38689 |
| 1 | -4.14883 |
| 1 | -4.01341 |
| 1 | -3.97389 |
| 0 | 4.08834  |
| 0 | 4.3122   |
| 1 | -4.08925 |
| 0 | 4.0386   |
| 0 | 4.0386   |
| 1 | -4.032   |
| 1 | -4.22685 |
| 1 | -3.95259 |
| 1 | -3.99593 |
| 0 | 4.28898  |
| 0 | 4.02396  |
| 1 | -4.22842 |
| 1 | -4.265   |
| 1 | -4.02082 |
| 0 | 3.9604   |
| 0 | 4.16049  |
| 1 | -4.09065 |
| 1 | -4.25925 |
| 0 | 3.96142  |
| 1 | -4.2602  |
| 0 | 4.1528   |
| 1 | -4.23175 |
| 0 | 4.14299  |
| 0 | 4.11995  |
| 1 | -4.37358 |
| 0 | 4.19522  |
| 0 | 4.04356  |
| 0 | 3.97396  |
| 0 | 4.25807  |
| 0 | 4.12831  |
| 0 | 4.07445  |

|   |          |
|---|----------|
| 0 | 4.00557  |
| 0 | 4.15507  |
| 0 | 4.09209  |
| 1 | -4.21726 |
| 0 | 4.00653  |
| 0 | 4.04743  |
| 0 | 4.39065  |
| 1 | -4.52234 |
| 1 | -4.05608 |
| 1 | -4.05608 |
| 1 | -4.00878 |
| 1 | -4.20129 |
| 1 | -4.03466 |
| 0 | 4.06741  |
| 1 | -4.06664 |
| 1 | -4.48268 |
| 1 | -4.48268 |
| 0 | 4.09282  |
| 1 | -4.4186  |
| 0 | 4.25095  |
| 1 | -4.25229 |
| 1 | -4.25229 |
| 0 | 4.10929  |
| 0 | 4.2295   |
| 0 | 3.99104  |
| 1 | -4.45054 |
| 1 | -4.06391 |
| 1 | -4.06391 |
| 1 | -4.00142 |
| 1 | -4.03477 |
| 1 | -4.09683 |
| 0 | 4.0712   |
| 1 | -4.33245 |
| 1 | -4.2681  |
| 0 | 3.96294  |
| 1 | -4.08485 |
| 1 | -4.06139 |
| 0 | 4.02533  |
| 0 | 3.95537  |
| 0 | 4.18865  |
| 0 | 4.05672  |
| 1 | -4.21146 |
| 0 | 4.06214  |
| 1 | -4.31007 |
| 1 | -4.03646 |
| 0 | 3.97613  |
| 0 | 3.97613  |

|   |          |
|---|----------|
| 0 | 4.01872  |
| 0 | 3.9552   |
| 0 | 3.98573  |
| 0 | 4.02471  |
| 1 | -4.19059 |
| 1 | -4.34706 |
| 1 | -4.11377 |
| 0 | 4.01098  |
| 0 | 4.01971  |
| 0 | 4.32507  |
| 0 | 3.99277  |
| 0 | 4.24017  |
| 1 | -4.16046 |
| 1 | -4.09559 |
| 1 | -4.02783 |
| 1 | -4.04088 |
| 1 | -4.04619 |
| 1 | -4.2452  |
| 1 | -4.48469 |
| 1 | -4.13443 |
| 1 | -4.10118 |
| 1 | -4.11702 |
| 0 | 4.29731  |
| 1 | -4.07531 |
| 0 | 4.08561  |
| 1 | -4.01921 |
| 1 | -4.43653 |
| 0 | 4.29477  |
| 1 | -4.24113 |
| 0 | 4.09249  |
| 0 | 4.03677  |
| 1 | -4.02761 |
| 0 | 4.15033  |
| 1 | -4.22152 |
| 1 | -3.95608 |
| 1 | -4.04287 |
| 0 | 4.20408  |
| 1 | -4.19166 |
| 0 | 4.15557  |
| 1 | -4.0225  |
| 1 | -4.13976 |
| 0 | 4.42268  |
| 1 | -4.34633 |
| 0 | 4.35643  |
| 1 | -3.9933  |
| 1 | -4.08712 |
| 0 | 3.91945  |

|   |          |
|---|----------|
| 0 | 4.38222  |
| 0 | 4.06643  |
| 1 | -4.14575 |
| 0 | 4.11146  |
| 1 | -4.00076 |
| 0 | 4.18257  |
| 1 | -4.01043 |
| 1 | -4.30417 |
| 0 | 4.11005  |
| 0 | 4.11005  |
| 1 | -3.96409 |
| 0 | 3.99183  |
| 1 | -4.02182 |
| 1 | -4.00281 |
| 0 | 4.06797  |
| 0 | 4.06797  |
| 0 | 4.21845  |
| 1 | -4.19448 |
| 1 | -4.1424  |
| 0 | 4.03994  |
| 1 | -4.05421 |
| 1 | -4.20075 |
| 0 | 4.07941  |
| 1 | -4.12517 |
| 0 | 4.18864  |
| 1 | -4.04378 |
| 1 | -4.16034 |
| 1 | -4.18138 |
| 0 | 4.18277  |
| 0 | 4.02654  |
| 0 | 4.28452  |
| 1 | -4.18    |
| 1 | -4.20414 |
| 0 | 4.16494  |
| 0 | 4.21084  |
| 1 | -4.29793 |
| 1 | -4.03226 |
| 1 | -4.06677 |
| 0 | 4.04419  |
| 0 | 4.13849  |
| 0 | 4.13849  |
| 1 | -4.00072 |
| 0 | 3.92525  |
| 1 | -4.11517 |
| 1 | -4.46291 |
| 1 | -4.15347 |
| 1 | -3.98008 |

|   |          |
|---|----------|
| 0 | 4.13763  |
| 1 | -3.94899 |
| 1 | -4.37241 |
| 1 | -4.28756 |
| 1 | -4.12236 |
| 0 | 4.04009  |
| 1 | -4.14443 |
| 1 | -4.29    |
| 1 | -4.27894 |
| 1 | -4.36029 |
| 1 | -4.334   |
| 1 | -4.48005 |
| 1 | -4.10769 |
| 1 | -4.16861 |
| 1 | -4.22192 |
| 1 | -3.96508 |
| 1 | -4.06816 |
| 1 | -4.05105 |
| 1 | -3.9709  |
| 1 | -4.26999 |
| 0 | 4.40853  |
| 1 | -4.37575 |
| 1 | -4.22543 |
| 1 | -4.13986 |
| 1 | -4.2672  |
| 1 | -4.28195 |
| 1 | -4.13447 |
| 1 | -4.21356 |
| 0 | 3.91829  |
| 1 | -4.03581 |
| 0 | 3.95396  |
| 1 | -4.36757 |
| 1 | -3.96573 |
| 1 | -4.26051 |
| 1 | -4.19573 |
| 1 | -4.236   |
| 1 | -4.39482 |
| 0 | 3.96535  |
| 1 | -4.15488 |
| 1 | -4.05898 |
| 1 | -4.04571 |
| 1 | -4.01446 |
| 1 | -4.41106 |
| 0 | 4.06466  |
| 0 | 4.0905   |
| 1 | -3.99179 |
| 1 | -4.12368 |

|   |          |
|---|----------|
| 1 | -4.16755 |
| 1 | -4.07616 |
| 1 | -4.29435 |
| 1 | -4.07173 |
| 1 | -4.01982 |
| 1 | -4.00645 |
| 1 | -4.15978 |
| 1 | -4.0353  |
| 1 | -4.0353  |
| 1 | -4.06647 |
| 1 | -4.06647 |
| 1 | -4.09174 |
| 1 | -4.09174 |
| 1 | -4.24433 |
| 1 | -4.37994 |
| 0 | 4.23774  |
| 0 | 3.92449  |
| 1 | -4.00833 |
| 1 | -4.00833 |
| 1 | -4.11394 |
| 1 | -4.18532 |
| 1 | -4.49063 |
| 1 | -4.14308 |
| 1 | -4.25926 |
| 1 | -4.25926 |
| 1 | -4.34448 |
| 1 | -4.15963 |
| 1 | -4.12446 |
| 1 | -4.00407 |
| 1 | -4.16969 |
| 0 | 3.99194  |
| 1 | -4.01752 |
| 0 | 4.1179   |
| 0 | 4.40947  |
| 0 | 3.97249  |
| 1 | -4.29474 |
| 0 | 4.15744  |
| 1 | -4.09385 |
| 1 | -4.29902 |
| 1 | -4.29902 |
| 1 | -4.10165 |
| 0 | 4.26877  |
| 0 | 4.33461  |
| 0 | 4.05142  |
| 1 | -4.29185 |
| 1 | -4.28136 |
| 0 | 4.22873  |



|          |          |
|----------|----------|
| 1        | -3.98424 |
| 1        | -4.07148 |
| 0        | 4.09116  |
| 1        | -4.0824  |
| 1        | -4.0824  |
| 0        | 4.16125  |
| 0        | 4.07276  |
| 0        | 4.01535  |
| 0        | 4.21499  |
| 1        | -4.23887 |
| 1        | -4.12149 |
| 1        | -4.00346 |
| 1        | -4.00346 |
| 1        | -4.56185 |
| 1        | -4.07316 |
| 1        | -4.19414 |
| 1        | -4.18715 |
| 1        | -4.49902 |
| 1        | -4.04088 |
| 1        | -4.04088 |
| 1        | -4.06618 |
| 0        | 3.92485  |
| 1        | -4.04248 |
| 0.444444 | 4.25335  |
| 1        | -4.06582 |
| 1        | -4.00607 |
| 1        | -4.22943 |
| 1        | -4.22943 |
| 0        | 4.03495  |
| 1        | -4.18618 |
| 1        | -4.23376 |
| 1        | -4.02036 |
| 1        | -4.01468 |
| 1        | -4.54143 |
| 0        | 4.10735  |
| 1        | -3.96671 |
| 0        | 4.12634  |
| 0        | 4.0425   |
| 1        | -4.31156 |
| 0        | 4.05594  |
| 1        | -4.1885  |
| 1        | -4.26726 |
| 1        | -3.97655 |
| 1        | -4.21687 |
| 1        | -4.17265 |
| 1        | -4.14847 |
| 1        | -4.14847 |

|   |          |
|---|----------|
| 1 | -4.23211 |
| 1 | -4.04227 |
| 1 | -4.06076 |
| 1 | -4.05473 |
| 1 | -4.51904 |
| 1 | -4.04453 |
| 1 | -4.04453 |
| 1 | -4.22249 |
| 1 | -4.21042 |
| 1 | -4.09517 |
| 1 | -4.07627 |
| 1 | -3.96583 |
| 0 | 4.24915  |
| 1 | -4.062   |
| 0 | 4.10214  |
| 1 | -4.05831 |
| 0 | 3.98727  |
| 1 | -4.11097 |
| 1 | -4.39056 |
| 1 | -4.006   |
| 1 | -4.23244 |
| 1 | -4.23244 |
| 1 | -4.11542 |
| 1 | -4.22614 |
| 1 | -4.04274 |
| 1 | -4.12192 |
| 0 | 4.01572  |
| 1 | -4.09109 |
| 0 | 4.25327  |
| 1 | -4.0072  |
| 1 | -4.35337 |
| 1 | -4.11952 |
| 1 | -4.41311 |
| 1 | -4.04329 |
| 0 | 4.17896  |
| 1 | -4.14229 |
| 1 | -4.28271 |
| 1 | -4.28271 |
| 1 | -4.04215 |
| 1 | -4.27974 |
| 1 | -4.2211  |
| 1 | -4.13157 |
| 0 | 3.93842  |
| 0 | 4.01556  |
| 0 | 4.10646  |
| 1 | -4.27971 |
| 1 | -3.98427 |

|   |          |
|---|----------|
| 1 | -3.98427 |
| 1 | -4.02828 |
| 1 | -4.34787 |
| 0 | 4.09433  |
| 0 | 4.01298  |
| 0 | 4.00289  |
| 0 | 4.09359  |
| 0 | 4.25887  |
| 1 | -4.0622  |
| 1 | -4.04744 |
| 0 | 4.02353  |
| 1 | -4.30531 |
| 1 | -4.06029 |
| 1 | -4.22021 |
| 0 | 4.26429  |
| 1 | -4.01325 |
| 1 | -3.99845 |
| 1 | -4.02853 |
| 1 | -4.02705 |
| 1 | -4.10877 |
| 0 | 4.23463  |
| 1 | -4.28427 |
| 1 | -4.17545 |
| 1 | -4.28157 |
| 0 | 4.11585  |
| 0 | 4.15599  |
| 0 | 4.04808  |
| 1 | -4.06477 |
| 0 | 4.1812   |
| 0 | 4.01262  |
| 0 | 4.21542  |
| 0 | 3.94796  |
| 1 | -4.01577 |
| 0 | 4.08173  |
| 0 | 4.06192  |
| 0 | 4.0425   |
| 0 | 4.1393   |
| 1 | -4.28916 |
| 0 | 4.26374  |
| 0 | 3.94542  |
| 1 | -4.18857 |
| 0 | 4.12491  |
| 1 | -4.01545 |
| 1 | -4.031   |
| 1 | -4.00959 |
| 1 | -3.95773 |
| 1 | -3.97948 |

|   |          |
|---|----------|
| 1 | -4.5168  |
| 1 | -4.05781 |
| 0 | 4.24894  |
| 1 | -4.26188 |
| 1 | -3.99026 |
| 0 | 4.0394   |
| 1 | -4.03299 |
| 1 | -4.03299 |
| 1 | -4.04175 |
| 1 | -4.34856 |
| 0 | 4.29894  |
| 1 | -4.02065 |
| 1 | -4.0601  |
| 1 | -3.97554 |
| 0 | 4.27588  |
| 1 | -4.008   |
| 1 | -4.53787 |
| 1 | -4.53787 |
| 1 | -3.96499 |
| 0 | 4.1086   |
| 1 | -3.95164 |
| 1 | -4.40923 |
| 1 | -4.14018 |
| 1 | -4.14018 |
| 1 | -4.07354 |
| 1 | -3.96869 |
| 0 | 4.28055  |
| 1 | -4.0628  |
| 1 | -4.39527 |
| 0 | 4.04636  |
| 1 | -3.97456 |
| 0 | 4.3463   |
| 0 | 4.14306  |
| 0 | 4.44411  |
| 0 | 4.14665  |
| 0 | 4.14665  |
| 1 | -4.05234 |
| 1 | -4.05234 |
| 0 | 4.23552  |
| 1 | -4.00104 |
| 1 | -4.00306 |
| 1 | -4.14266 |
| 0 | 4.04986  |
| 0 | 4.32502  |
| 1 | -3.99159 |
| 1 | -4.27093 |
| 1 | -3.9514  |

|   |          |
|---|----------|
| 0 | 3.9843   |
| 1 | -4.44331 |
| 0 | 4.3862   |
| 0 | 4.08445  |
| 0 | 3.98588  |
| 1 | -4.05558 |
| 1 | -3.95577 |
| 0 | 4.02088  |
| 1 | -4.27409 |
| 1 | -4.23889 |
| 1 | -4.20716 |
| 1 | -4.04429 |
| 1 | -4.0438  |
| 1 | -4.22974 |
| 1 | -3.97369 |
| 1 | -4.13759 |
| 0 | 4.08465  |
| 0 | 4.00397  |
| 1 | -4.19745 |
| 1 | -3.95346 |
| 0 | 4.33201  |
| 1 | -4.31842 |
| 1 | -4.0382  |
| 1 | -4.16831 |
| 0 | 4.38473  |
| 0 | 4.17157  |
| 0 | 4.19071  |
| 0 | 4.16002  |
| 1 | -4.1176  |
| 0 | 4.07908  |
| 0 | 4.12431  |
| 0 | 4.01659  |
| 0 | 4.01341  |
| 0 | 4.16678  |
| 0 | 4.26958  |
| 0 | 4.01424  |
| 1 | -4.28609 |
| 0 | 4.09665  |
| 0 | 4.106    |
| 1 | -4.06777 |
| 1 | -4.23441 |
| 1 | -4.55204 |
| 0 | 3.9154   |
| 0 | 3.9154   |
| 0 | 4.20436  |
| 1 | -4.1229  |
| 1 | -4.1229  |

|          |          |
|----------|----------|
| 1        | -4.44419 |
| 1        | -4.44419 |
| 1        | -4.32286 |
| 0        | 4.04092  |
| 0        | 4.48169  |
| 0        | 3.99141  |
| 0        | 4.29097  |
| 1        | -4.4368  |
| 0        | 4.04085  |
| 1        | -4.06622 |
| 1        | -4.32653 |
| 1        | -4.09032 |
| 0        | 4.16365  |
| 0        | 4.12927  |
| 0        | 4.0622   |
| 0        | 4.20024  |
| 1        | -4.01581 |
| 0        | 4.0828   |
| 1        | -4.10068 |
| 1        | -4.02001 |
| 0        | 4.20897  |
| 0        | 4.09859  |
| 0        | 4.08049  |
| 1        | -4.05301 |
| 1        | -4.13084 |
| 0        | 4.22531  |
| 0        | 4.00797  |
| 0        | 4.39201  |
| 0        | 4.1159   |
| 0        | 4.05696  |
| 0        | 4.12896  |
| 0        | 4.42296  |
| 0        | 3.96478  |
| 0        | 3.97854  |
| 1        | -4.07781 |
| 0        | 4.05767  |
| 1        | -4.26117 |
| 1        | -4.22395 |
| 1        | -4.22395 |
| 1        | -4.41465 |
| 1        | -4.2842  |
| 1        | -4.18013 |
| 0        | 4.41399  |
| 0.428571 | -4.01316 |
| 1        | -4.31883 |
| 0        | 4.21611  |
| 0        | 4.01318  |

|   |          |
|---|----------|
| 0 | 4.13792  |
| 0 | 4.08196  |
| 1 | -4.06163 |
| 0 | 4.02845  |
| 0 | 4.22933  |
| 0 | 4.34032  |
| 1 | -4.32056 |
| 0 | 4.03609  |
| 0 | 4.04307  |
| 0 | 3.96356  |
| 0 | 4.09743  |
| 1 | -3.98725 |
| 0 | 4.41518  |
| 1 | -4.00587 |
| 0 | 4.03841  |
| 0 | 4.17174  |
| 0 | 4.02802  |
| 0 | 4.02255  |
| 0 | 4.04604  |
| 0 | 4.07179  |
| 0 | 3.94548  |
| 1 | -4.3667  |
| 0 | 4.02287  |
| 0 | 3.9205   |
| 1 | -4.03129 |
| 0 | 3.94095  |
| 0 | 4.14989  |
| 0 | 4.44839  |
| 0 | 4.08166  |
| 1 | -4.38825 |
| 0 | 4.20216  |
| 0 | 4.11928  |
| 1 | -4.43154 |
| 0 | 4.08207  |
| 0 | 4.19547  |
| 1 | -3.96587 |
| 1 | -3.96461 |
| 0 | 4.36442  |
| 1 | -4.04677 |
| 1 | -4.00687 |
| 0 | 4.11599  |
| 1 | -4.26873 |
| 0 | 3.98134  |
| 0 | 4.01703  |
| 0 | 4.05346  |
| 0 | 3.98097  |
| 1 | -4.07204 |

|   |          |
|---|----------|
| 0 | 4.20886  |
| 1 | -4.36871 |
| 1 | -4.16699 |
| 1 | -4.24152 |
| 1 | -3.97924 |
| 0 | 4.03195  |
| 1 | -4.11147 |
| 0 | 4.01799  |
| 0 | 4.01799  |
| 0 | 4.31933  |
| 0 | 4.17904  |
| 0 | 4.12654  |
| 1 | -4.04682 |
| 0 | 4.19534  |
| 0 | 4.02063  |
| 1 | -4.5517  |
| 1 | -3.99486 |
| 1 | -3.99531 |
| 1 | -3.99531 |
| 1 | -4.0713  |
| 1 | -4.34168 |
| 1 | -4.0578  |
| 1 | -4.32609 |
| 1 | -4.17763 |
| 0 | 3.94481  |
| 0 | 4.00382  |
| 0 | 4.13531  |
| 0 | 4.13531  |
| 0 | 3.93076  |
| 0 | 4.32331  |
| 0 | 4.04808  |
| 1 | -4.01345 |
| 0 | 4.07941  |
| 1 | -3.96965 |
| 0 | 3.93378  |
| 0 | 3.95789  |
| 1 | -4.21758 |
| 1 | -4.22516 |
| 0 | 4.26549  |
| 0 | 3.95262  |
| 0 | 4.31947  |
| 0 | 4.02278  |
| 0 | 4.09545  |
| 0 | 4.02891  |
| 0 | 4.09749  |
| 0 | 3.95907  |
| 1 | -4.06531 |



|   |          |
|---|----------|
| 1 | -4.02278 |
| 1 | -4.02278 |
| 0 | 4.1512   |
| 0 | 4.27681  |
| 0 | 4.11031  |
| 1 | -4.09267 |
| 1 | -4.18835 |
| 1 | -4.1371  |
| 1 | -4.02755 |
| 1 | -4.41568 |
| 1 | -4.52162 |
| 0 | 4.06343  |
| 0 | 3.9584   |
| 1 | -4.30999 |
| 1 | -4.35358 |
| 0 | 4.44598  |
| 0 | 4.06924  |
| 0 | 3.95883  |
| 0 | 4.04051  |
| 0 | 4.30761  |
| 0 | 4.01785  |
| 1 | -4.43325 |
| 0 | 4.45267  |
| 0 | 3.99708  |
| 1 | -4.1205  |
| 1 | -4.13942 |
| 0 | 4.00963  |
| 0 | 4.32458  |
| 1 | -4.07904 |
| 0 | 4.00573  |
| 1 | -4.12249 |
| 1 | -4.20102 |
| 0 | 4.24467  |
| 1 | -4.1337  |
| 1 | -4.06205 |
| 1 | -4.08346 |
| 1 | -4.25858 |
| 1 | -4.29991 |
| 1 | -4.29991 |
| 0 | 4.08547  |
| 1 | -4.23788 |
| 0 | 4.02896  |
| 1 | -4.48202 |
| 1 | -4.02634 |
| 1 | -4.23582 |
| 0 | 4.39353  |
| 1 | -4.18588 |

|   |          |
|---|----------|
| 1 | -4.10787 |
| 1 | -4.51293 |
| 1 | -4.51293 |
| 1 | -4.27457 |
| 0 | 4.17415  |
| 1 | -4.0617  |
| 1 | -4.0114  |
| 1 | -4.20527 |
| 1 | -4.22734 |
| 1 | -3.9689  |
| 0 | 3.9845   |
| 0 | 3.9818   |
| 1 | -4.03985 |
| 0 | 3.9208   |
| 0 | 4.11396  |
| 0 | 4.17427  |
| 0 | 3.95222  |
| 1 | -4.08169 |
| 0 | 4.05988  |
| 1 | -4.44692 |
| 0 | 4.06487  |
| 0 | 4.08425  |
| 1 | -4.39512 |
| 1 | -4.06723 |
| 1 | -4.05547 |
| 0 | 4.04589  |
| 1 | -4.2189  |
| 1 | -4.084   |
| 1 | -4.26666 |
| 0 | 4.41253  |
| 0 | 4.06436  |
| 1 | -4.03938 |
| 0 | 4.28649  |
| 1 | -4.04772 |
| 0 | 4.02324  |
| 1 | -4.0748  |
| 0 | 4.15938  |
| 0 | 4.17155  |
| 1 | -4.11592 |
| 0 | 4.07013  |
| 1 | -4.42061 |
| 0 | 4.09879  |
| 0 | 4.31894  |
| 0 | 4.2018   |
| 1 | -4.00668 |
| 0 | 3.96698  |
| 1 | -4.01153 |

|   |          |
|---|----------|
| 1 | -4.00086 |
| 1 | -4.22556 |
| 0 | 4.0582   |
| 1 | -4.08452 |
| 1 | -4.07608 |
| 0 | 4.28058  |
| 0 | 4.18795  |
| 0 | 4.01529  |
| 1 | -4.03255 |
| 0 | 4.21996  |
| 0 | 4.4403   |
| 1 | -4.00431 |
| 0 | 4.44301  |
| 0 | 3.95807  |
| 1 | -4.06788 |
| 0 | 3.93364  |
| 1 | -4.25307 |
| 1 | -4.06272 |
| 1 | -4.08841 |
| 1 | -4.08841 |
| 0 | 4.01558  |
| 1 | -4.37735 |
| 1 | -4.37735 |
| 1 | -3.99147 |
| 1 | -3.99147 |
| 0 | 4.00741  |
| 1 | -4.29014 |
| 1 | -4.29014 |
| 0 | 4.18029  |
| 1 | -4.28449 |
| 1 | -4.28449 |
| 1 | -4.42065 |
| 0 | 4.04027  |
| 0 | 4.04027  |
| 0 | 3.9702   |
| 0 | 3.9702   |
| 1 | -4.44685 |
| 0 | 4.10947  |
| 0 | 4.01277  |
| 1 | -4.17556 |
| 0 | 4.37604  |
| 0 | 4.03486  |
| 1 | -4.54565 |
| 0 | 4.47027  |
| 1 | -3.96333 |
| 1 | -4.04282 |
| 1 | -4.49024 |

|   |          |
|---|----------|
| 1 | -4.04636 |
| 1 | -4.51849 |
| 1 | -4.04699 |
| 1 | -4.07859 |
| 1 | -4.52001 |
| 1 | -4.01001 |
| 1 | -4.0178  |
| 1 | -4.05564 |
| 0 | 4.1913   |
| 0 | 4.04003  |
| 1 | -4.16892 |
| 0 | 3.98966  |
| 1 | -4.38263 |
| 0 | 4.0958   |
| 1 | -4.06983 |
| 0 | 4.04585  |
| 0 | 4.02773  |
| 0 | 4.18568  |
| 0 | 4.10434  |
| 0 | 3.92013  |
| 0 | 4.15332  |
| 1 | -4.17104 |
| 1 | -4.11403 |
| 0 | 4.03063  |
| 1 | -4.00835 |
| 0 | 4.1495   |
| 0 | 4.1495   |
| 0 | 3.96213  |
| 0 | 4.05744  |
| 0 | 4.22777  |
| 1 | -4.10522 |
| 1 | -4.15344 |
| 1 | -4.3357  |
| 1 | -4.16468 |
| 1 | -3.94768 |
| 1 | -4.47953 |
| 1 | -3.95688 |
| 1 | -4.47269 |
| 0 | 4.16059  |
| 1 | -4.10224 |
| 0 | 4.22384  |
| 0 | 4.22757  |
| 1 | -4.13954 |
| 1 | -4.09589 |
| 1 | -3.99819 |
| 1 | -3.99725 |
| 1 | -3.99459 |

|   |          |
|---|----------|
| 1 | -4.2804  |
| 0 | 4.02512  |
| 1 | -4.06628 |
| 1 | -4.10238 |
| 0 | 3.95529  |
| 1 | -3.94894 |
| 1 | -4.40072 |
| 0 | 4.04079  |
| 1 | -4.29196 |
| 1 | -4.26559 |
| 1 | -4.20757 |
| 1 | -3.96718 |
| 1 | -4.02677 |
| 0 | 4.04985  |
| 0 | 4.03239  |
| 1 | -4.15934 |
| 0 | 4.25237  |
| 0 | 4.31269  |
| 0 | 4.25119  |
| 0 | 4.19035  |
| 0 | 3.92118  |
| 1 | -4.15633 |
| 0 | 4.02741  |
| 1 | -4.19036 |
| 1 | -4.19633 |
| 0 | 4.05555  |
| 1 | -4.01658 |
| 0 | 4.48631  |
| 0 | 4.01539  |
| 0 | 4.03489  |
| 1 | -3.96258 |
| 1 | -3.97694 |
| 1 | -4.2755  |
| 0 | 4.0353   |
| 1 | -4.10424 |
| 1 | -4.19912 |
| 1 | -4.14076 |
| 0 | 4.2795   |
| 1 | -4.23241 |
| 1 | -4.23241 |
| 0 | 4.35131  |
| 0 | 4.14944  |
| 1 | -4.08189 |
| 0 | 4.03297  |
| 1 | -4.04842 |
| 1 | -4.13807 |
| 0 | 3.98743  |

|   |          |
|---|----------|
| 1 | -4.094   |
| 1 | -4.28468 |
| 0 | 4.11299  |
| 0 | 4.1923   |
| 1 | -4.02024 |
| 1 | -4.02024 |
| 1 | -4.38568 |
| 0 | 3.94176  |
| 0 | 4.18297  |
| 1 | -4.23109 |
| 0 | 4.26568  |
| 0 | 4.26568  |
| 0 | 3.94849  |
| 0 | 4.0366   |
| 0 | 4.07046  |
| 0 | 4.15083  |
| 0 | 4.05236  |
| 0 | 4.04658  |
| 0 | 4.23793  |
| 1 | -4.08803 |
| 0 | 4.26117  |
| 1 | -3.96455 |
| 0 | 4.39451  |
| 0 | 4.29343  |
| 0 | 4.05163  |
| 1 | -4.37202 |
| 1 | -4.03017 |
| 1 | -4.01824 |
| 1 | -4.01824 |
| 1 | -3.97004 |
| 1 | -4.13454 |
| 0 | 4.26308  |
| 0 | 4.40223  |
| 1 | -4.23615 |
| 1 | -3.95615 |
| 1 | -4.04422 |
| 1 | -4.2191  |
| 0 | 4.16098  |
| 1 | -4.00667 |
| 0 | 3.93884  |
| 0 | 3.96363  |
| 0 | 4.13592  |
| 0 | 4.34389  |
| 1 | -4.06318 |
| 1 | -4.00761 |
| 0 | 4.43079  |
| 0 | 4.02079  |

|   |          |
|---|----------|
| 0 | 4.03001  |
| 1 | -4.06907 |
| 0 | 4.01862  |
| 0 | 4.08483  |
| 0 | 3.9918   |
| 0 | 4.00674  |
| 0 | 3.97008  |
| 0 | 4.29908  |
| 0 | 4.228    |
| 0 | 4.22292  |
| 1 | -4.01512 |
| 0 | 4.0154   |
| 1 | -4.00234 |
| 0 | 4.05358  |
| 0 | 3.93684  |
| 0 | 4.00562  |
| 0 | 4.0191   |
| 0 | 4.0191   |
| 0 | 4.22559  |
| 0 | 4.03815  |
| 1 | -4.21166 |
| 0 | 4.03602  |
| 1 | -4.35474 |
| 0 | 4.21726  |
| 1 | -4.33258 |
| 0 | 4.19071  |
| 1 | -4.11389 |
| 1 | -4.11389 |
| 1 | -3.94794 |
| 0 | 4.11056  |
| 0 | 4.06431  |
| 1 | -4.14939 |
| 1 | -4.5184  |
| 0 | 3.96949  |
| 1 | -4.31602 |
| 1 | -4.02373 |
| 1 | -4.2941  |
| 0 | 4.04383  |
| 1 | -4.28421 |
| 0 | 4.12751  |
| 1 | -4.24698 |
| 0 | 4.24814  |
| 1 | -4.4871  |
| 0 | 4.16417  |
| 0 | 4.1447   |
| 0 | 4.14847  |
| 0 | 4.14847  |

|   |          |
|---|----------|
| 1 | -4.05071 |
| 1 | -4.17427 |
| 0 | 4.22808  |
| 0 | 4.02451  |
| 0 | 4.19654  |
| 1 | -4.08466 |
| 1 | -4.08466 |
| 1 | -4.01166 |
| 0 | 4.31636  |
| 1 | -4.06849 |
| 1 | -4.49454 |
| 1 | -4.22617 |
| 1 | -4.00835 |
| 1 | -3.98373 |
| 1 | -3.98373 |
| 1 | -3.98321 |
| 1 | -4.18921 |
| 1 | -4.11242 |
| 1 | -4.09633 |
| 1 | -4.09633 |
| 0 | 4.261    |
| 0 | 4.25615  |
| 1 | -4.24944 |
| 1 | -4.22892 |
| 1 | -4.18823 |
| 1 | -4.26218 |
| 0 | 4.36644  |
| 1 | -4.20194 |
| 1 | -4.00786 |
| 1 | -4.14853 |
| 0 | 4.14045  |
| 0 | 4.01118  |
| 1 | -4.56034 |
| 0 | 4.03302  |
| 0 | 4.03302  |
| 0 | 4.06262  |
| 1 | -4.02021 |
| 1 | -4.00093 |
| 1 | -4.00025 |
| 1 | -4.04806 |
| 1 | -4.00648 |
| 1 | -4.00648 |
| 1 | -4.11727 |
| 1 | -4.03139 |
| 1 | -4.09853 |
| 1 | -4.03311 |
| 0 | 4.30754  |



|   |          |
|---|----------|
| 0 | 3.99066  |
| 1 | -4.08004 |
| 0 | 4.10798  |
| 0 | 4.07882  |
| 1 | -4.54397 |
| 1 | -4.54397 |
| 1 | -4.00552 |
| 1 | -4.07935 |
| 0 | 4.30012  |
| 1 | -4.2145  |
| 1 | -4.09938 |
| 0 | 4.42065  |
| 0 | 4.28833  |
| 1 | -4.06987 |
| 1 | -4.06987 |
| 0 | 4.22547  |
| 0 | 4.3334   |
| 0 | 4.3334   |
| 0 | 4.25008  |
| 1 | -4.01365 |
| 0 | 4.34718  |
| 1 | -4.36834 |
| 0 | 4.06027  |
| 0 | 3.99998  |
| 1 | -4.04665 |
| 1 | -3.95815 |
| 1 | -3.95815 |
| 1 | -4.21604 |
| 1 | -4.02997 |
| 0 | 3.9673   |
| 1 | -4.37259 |
| 1 | -4.10873 |
| 0 | 4.4138   |
| 1 | -4.00299 |
| 1 | -4.10194 |
| 1 | -3.94979 |
| 1 | -4.14371 |
| 0 | 4.20361  |
| 0 | 3.93432  |
| 1 | -4.09211 |
| 1 | -4.06405 |
| 1 | -4.21829 |
| 1 | -3.96809 |
| 0 | 4.24859  |
| 0 | 4.05227  |
| 1 | -4.37566 |
| 1 | -4.20279 |

|        |          |
|--------|----------|
| 1      | -4.33248 |
| 1      | -4.38886 |
| 1      | -3.97834 |
| 0      | 3.9316   |
| 1      | -4.06107 |
| 1      | -4.54688 |
| 1      | -3.99684 |
| 1      | -4.49555 |
| 1      | -4.30624 |
| 1      | -4.09919 |
| 0      | 3.93723  |
| 1      | -4.18035 |
| 0      | 4.07986  |
| 1      | -4.09519 |
| 0      | 4.01215  |
| 1      | -4.06993 |
| 1      | -4.34757 |
| 0      | 3.93014  |
| 1      | -4.00199 |
| 1      | -4.05317 |
| 1      | -3.99512 |
| 0      | 4.37565  |
| 0      | 4.01943  |
| 0      | 4.01943  |
| 0      | 4.18941  |
| 0      | 4.18941  |
| 0      | 4.09925  |
| 1      | -4.07921 |
| 1      | -4.03635 |
| 0      | 4.19675  |
| 0      | 4.09848  |
| 0      | 4.30965  |
| 1      | -3.99365 |
| 0      | 3.93482  |
| 0      | 4.0244   |
| 1      | -4.13024 |
| 0      | 3.91327  |
| 0      | 3.98791  |
| 0      | 4.02441  |
| 0      | 4.41959  |
| 1      | -4.1927  |
| 1      | -4.13142 |
| 1      | -4.17272 |
| 0      | 4.03605  |
| 0      | 4.08364  |
| 0.4375 | -4.15767 |
| 0      | 4.01737  |

|   |          |
|---|----------|
| 0 | 4.33476  |
| 0 | 3.95017  |
| 0 | 4.19784  |
| 0 | 4.13769  |
| 0 | 4.06652  |
| 1 | -4.09078 |
| 1 | -4.12475 |
| 0 | 4.18265  |
| 0 | 3.95233  |
| 1 | -4.03207 |
| 1 | -4.00945 |
| 1 | -4.11561 |
| 1 | -4.21403 |
| 0 | 4.21231  |
| 1 | -4.4805  |
| 0 | 4.0847   |
| 0 | 4.06536  |
| 1 | -4.49506 |
| 0 | 3.91592  |
| 0 | 4.08389  |
| 1 | -4.01508 |
| 1 | -4.01508 |
| 1 | -4.17814 |
| 0 | 4.14817  |
| 1 | -4.1307  |
| 0 | 4.06883  |
| 1 | -4.03376 |
| 1 | -4.10735 |
| 1 | -4.10735 |
| 1 | -4.37746 |
| 0 | 4.28386  |
| 0 | 4.35732  |
| 1 | -3.97267 |
| 0 | 4.47278  |
| 0 | 4.36304  |
| 1 | -4.076   |
| 0 | 4.05029  |
| 0 | 4.30748  |
| 1 | -4.10163 |
| 1 | -3.95612 |
| 0 | 4.10893  |
| 0 | 4.0769   |
| 0 | 3.9567   |
| 1 | -4.50805 |
| 1 | -4.01977 |
| 1 | -4.27112 |
| 1 | -4.30802 |

|   |          |
|---|----------|
| 1 | -4.01366 |
| 0 | 4.38444  |
| 1 | -3.95969 |
| 1 | -4.02814 |
| 1 | -4.1805  |
| 1 | -4.1805  |
| 0 | 4.12105  |
| 0 | 4.10046  |
| 0 | 4.10577  |
| 0 | 4.07794  |
| 0 | 4.02062  |
| 0 | 4.01806  |
| 0 | 4.36699  |
| 0 | 4.05133  |
| 0 | 3.9333   |
| 0 | 4.12991  |
| 0 | 4.05659  |
| 1 | -3.94936 |
| 0 | 4.10235  |
| 0 | 4.04871  |
| 0 | 4.04591  |
| 1 | -4.00757 |
| 1 | -3.95283 |
| 1 | -4.42347 |
| 1 | -4.42347 |
| 1 | -4.32715 |
| 0 | 4.00089  |
| 1 | -4.04321 |
| 0 | 4.30751  |
| 1 | -4.05448 |
| 0 | 4.11824  |
| 1 | -4.05573 |
| 0 | 4.10395  |
| 1 | -4.18688 |
| 0 | 4.10022  |
| 0 | 4.10022  |
| 1 | -4.22905 |
| 1 | -4.26806 |
| 1 | -3.97347 |
| 1 | -4.02454 |
| 0 | 4.02419  |
| 0 | 3.98573  |
| 1 | -3.99072 |
| 1 | -3.97208 |
| 1 | -4.37531 |
| 1 | -4.13971 |
| 1 | -4.43372 |

|   |          |
|---|----------|
| 0 | 4.03145  |
| 1 | -4.10684 |
| 0 | 4.1341   |
| 1 | -3.95223 |
| 0 | 4.00878  |
| 0 | 4.02449  |
| 1 | -4.13619 |
| 1 | -4.39307 |
| 0 | 4.03307  |
| 0 | 3.95885  |
| 0 | 4.04676  |
| 0 | 4.05123  |
| 1 | -4.01128 |
| 1 | -4.03288 |
| 1 | -4.56718 |
| 0 | 4.04014  |
| 1 | -4.0598  |
| 0 | 4.27881  |
| 1 | -4.03643 |
| 1 | -3.9906  |
| 1 | -4.35928 |
| 0 | 4.03485  |
| 1 | -4.11326 |
| 0 | 4.00569  |
| 1 | -4.11839 |
| 0 | 4.03404  |
| 1 | -4.13673 |
| 1 | -4.23739 |
| 1 | -3.97991 |
| 1 | -3.95399 |
| 1 | -4.06609 |
| 0 | 3.92229  |
| 1 | -4.25826 |
| 1 | -4.25826 |
| 1 | -4.10992 |
| 0 | 3.98317  |
| 0 | 4.12371  |
| 0 | 4.14184  |
| 0 | 4.2195   |
| 1 | -4.24455 |
| 0 | 3.92653  |
| 0 | 4.0841   |
| 1 | -4.33466 |
| 0 | 4.05799  |
| 0 | 4.1799   |
| 0 | 3.91501  |
| 0 | 3.91501  |

|   |          |
|---|----------|
| 1 | -4.05895 |
| 1 | -4.16967 |
| 0 | 4.3145   |
| 0 | 3.98068  |
| 0 | 4.21106  |
| 1 | -4.22321 |
| 0 | 4.20825  |
| 0 | 4.04096  |
| 0 | 3.97125  |
| 1 | -4.41258 |
| 0 | 4.05087  |
| 0 | 4.24689  |
| 1 | -4.27116 |
| 0 | 4.10029  |
| 1 | -4.17315 |
| 1 | -4.09074 |
| 0 | 4.04759  |
| 0 | 4.16156  |
| 1 | -3.9938  |
| 1 | -4.29062 |
| 1 | -4.21389 |
| 1 | -4.21389 |
| 0 | 4.24708  |
| 0 | 4.33057  |
| 1 | -4.12335 |
| 0 | 4.16045  |
| 0 | 4.28874  |
| 0 | 4.15024  |
| 1 | -4.06662 |
| 0 | 3.9151   |
| 1 | -3.99366 |
| 1 | -3.96596 |
| 0 | 4.09422  |
| 1 | -4.23897 |
| 0 | 4.48178  |
| 1 | -4.02698 |
| 0 | 3.93721  |
| 0 | 3.94751  |
| 1 | -4.13484 |
| 1 | -3.95093 |
| 0 | 4.37214  |
| 0 | 4.07227  |
| 1 | -4.1857  |
| 0 | 3.9725   |
| 1 | -4.05835 |
| 1 | -4.18306 |
| 1 | -4.42598 |

|   |          |
|---|----------|
| 0 | 4.23701  |
| 0 | 4.10038  |
| 0 | 4.24556  |
| 0 | 3.9475   |
| 1 | -4.04665 |
| 1 | -4.04665 |
| 0 | 4.23768  |
| 1 | -4.01414 |
| 0 | 4.10641  |
| 0 | 3.91607  |
| 1 | -4.21314 |
| 0 | 3.94433  |
| 0 | 4.07966  |
| 1 | -4.1111  |
| 1 | -4.31502 |
| 0 | 3.96138  |
| 1 | -4.33071 |
| 1 | -4.39962 |
| 1 | -4.31817 |
| 1 | -4.26127 |
| 1 | -4.2055  |
| 1 | -4.12531 |
| 1 | -4.08885 |
| 1 | -4.08885 |
| 1 | -4.33914 |
| 1 | -4.33914 |
| 0 | 4.39084  |
| 1 | -4.04194 |
| 0 | 4.42766  |
| 0 | 4.11791  |
| 0 | 4.2921   |
| 1 | -4.39959 |
| 1 | -3.969   |
| 0 | 4.00354  |
| 0 | 4.00803  |
| 1 | -3.97219 |
| 0 | 4.10888  |
| 0 | 3.98458  |
| 0 | 4.23919  |
| 1 | -4.56273 |
| 0 | 4.06145  |
| 1 | -4.02506 |
| 0 | 4.22618  |
| 0 | 4.2388   |
| 1 | -4.24513 |
| 0 | 4.13656  |
| 0 | 4.43075  |

|   |          |
|---|----------|
| 1 | -4.07597 |
| 0 | 4.11728  |
| 0 | 4.11275  |
| 0 | 4.16848  |
| 0 | 4.17208  |
| 0 | 4.35641  |
| 0 | 4.02267  |
| 0 | 4.15388  |
| 1 | -4.05857 |
| 1 | -4.05857 |
| 1 | -4.34273 |
| 1 | -4.34273 |
| 1 | -4.07608 |
| 1 | -4.07608 |
| 0 | 4.1325   |
| 0 | 4.04768  |
| 0 | 3.93042  |
| 0 | 4.04787  |
| 1 | -4.08785 |
| 1 | -4.37651 |
| 0 | 3.91995  |
| 0 | 4.05549  |
| 1 | -4.17165 |
| 0 | 3.97899  |
| 0 | 4.2123   |
| 1 | -4.18884 |
| 1 | -4.15366 |
| 0 | 3.97465  |
| 1 | -4.24643 |
| 0 | 4.08633  |
| 1 | -4.42534 |
| 1 | -4.0344  |
| 0 | 4.06056  |
| 1 | -3.97793 |
| 0 | 4.02502  |
| 0 | 4.00812  |
| 1 | -4.28475 |
| 1 | -4.28475 |
| 0 | 4.25969  |
| 1 | -4.02679 |
| 1 | -4.11428 |
| 0 | 4.08669  |
| 1 | -4.10848 |
| 1 | -4.14243 |
| 1 | -4.24279 |
| 1 | -4.24279 |
| 1 | -4.00536 |



|   |          |
|---|----------|
| 1 | -4.4901  |
| 1 | -4.31706 |
| 1 | -4.04411 |
| 1 | -4.06825 |
| 0 | 4.10948  |
| 1 | -4.02375 |
| 1 | -4.0176  |
| 0 | 3.96206  |
| 1 | -4.10645 |
| 1 | -4.10645 |
| 1 | -4.08726 |
| 1 | -4.08729 |
| 1 | -3.98435 |
| 1 | -4.08918 |
| 1 | -4.02125 |
| 1 | -4.33358 |
| 0 | 4.24439  |
| 1 | -4.03655 |
| 1 | -3.9599  |
| 1 | -4.11614 |
| 0 | 4.17649  |
| 1 | -4.27859 |
| 0 | 4.3174   |
| 1 | -4.48965 |
| 1 | -4.56572 |
| 0 | 4.42084  |
| 1 | -4.34671 |
| 0 | 3.99993  |
| 1 | -3.95998 |
| 1 | -4.12858 |
| 0 | 4.45496  |
| 1 | -4.15274 |
| 1 | -4.11803 |
| 1 | -4.16969 |
| 1 | -4.07821 |
| 0 | 4.16266  |
| 0 | 4.16266  |
| 0 | 4.04646  |
| 0 | 4.13235  |
| 0 | 4.00351  |
| 0 | 4.00351  |
| 1 | -4.33683 |
| 1 | -4.33683 |
| 0 | 4.1247   |
| 0 | 4.05856  |
| 1 | -4.16902 |
| 0 | 4.01069  |

|   |          |
|---|----------|
| 1 | -4.13123 |
| 0 | 4.14036  |
| 1 | -4.44915 |
| 1 | -4.01392 |
| 1 | -4.02836 |
| 0 | 4.23774  |
| 0 | 4.23774  |
| 1 | -4.16152 |
| 0 | 3.98019  |
| 1 | -3.96036 |
| 1 | -4.0181  |
| 1 | -4.0181  |
| 1 | -3.97341 |
| 1 | -4.10043 |
| 1 | -4.09586 |
| 1 | -4.09141 |
| 0 | 4.37117  |
| 1 | -3.99717 |
| 0 | 4.15897  |
| 1 | -4.1504  |
| 1 | -4.13587 |
| 1 | -4.05191 |
| 0 | 4.28819  |
| 1 | -4.03084 |
| 1 | -4.17729 |
| 1 | -4.17729 |
| 1 | -4.00647 |
| 1 | -4.00647 |
| 1 | -4.25004 |
| 0 | 4.01662  |
| 0 | 4.01662  |
| 1 | -4.00047 |
| 1 | -4.09814 |
| 1 | -4.0772  |
| 0 | 4.15578  |
| 1 | -4.05507 |
| 1 | -4.08874 |
| 1 | -4.34079 |
| 0 | 3.96869  |
| 0 | 3.98325  |
| 1 | -4.03991 |
| 0 | 4.19718  |
| 1 | -4.2456  |
| 1 | -4.31718 |
| 0 | 4.13215  |
| 0 | 4.40734  |
| 1 | -4.13297 |

|   |          |
|---|----------|
| 0 | 4.36239  |
| 0 | 4.36239  |
| 1 | -4.13054 |
| 0 | 4.28382  |
| 0 | 4.11053  |
| 1 | -4.017   |
| 0 | 3.96197  |
| 1 | -4.28371 |
| 0 | 4.02897  |
| 0 | 4.39185  |
| 1 | -4.26119 |
| 1 | -4.08096 |
| 0 | 4.19909  |
| 1 | -4.47016 |
| 0 | 4.07468  |
| 0 | 4.07468  |
| 1 | -4.54643 |
| 1 | -4.02358 |
| 0 | 4.14004  |
| 1 | -4.0432  |
| 0 | 4.1609   |
| 0 | 4.1609   |
| 0 | 4.15122  |
| 1 | -4.4743  |
| 1 | -4.02577 |
| 1 | -4.04701 |
| 1 | -4.19259 |
| 0 | 4.01137  |
| 1 | -4.03486 |
| 0 | 4.06029  |
| 1 | -4.3753  |
| 1 | -4.38834 |
| 0 | 4.25072  |
| 1 | -4.1333  |
| 0 | 3.97769  |
| 1 | -4.21183 |
| 1 | -4.02972 |
| 1 | -3.96547 |
| 1 | -4.04843 |
| 0 | 4.06733  |
| 0 | 4.32517  |
| 0 | 4.32517  |
| 1 | -4.03797 |
| 1 | -4.03797 |
| 0 | 4.31274  |
| 0 | 4.31274  |
| 0 | 4.10615  |

|   |          |
|---|----------|
| 0 | 4.10615  |
| 1 | -3.95155 |
| 1 | -4.01969 |
| 0 | 3.98324  |
| 1 | -4.03332 |
| 1 | -4.4426  |
| 0 | 4.03334  |
| 1 | -4.28492 |
| 1 | -4.06148 |
| 1 | -4.06148 |
| 1 | -4.09055 |
| 1 | -4.35678 |
| 0 | 4.14701  |
| 0 | 4.14701  |
| 1 | -4.11469 |
| 1 | -4.11469 |
| 1 | -4.32765 |
| 0 | 3.97212  |
| 0 | 4.075    |
| 0 | 4.16131  |
| 1 | -4.56352 |
| 0 | 4.00478  |
| 0 | 4.25034  |
| 1 | -3.99573 |
| 1 | -4.0198  |
| 1 | -4.03753 |
| 0 | 4.22611  |
| 0 | 3.93384  |
| 1 | -4.11728 |
| 1 | -4.29955 |
| 1 | -4.13786 |
| 0 | 3.95652  |
| 1 | -4.10312 |
| 1 | -4.23732 |
| 0 | 4.04087  |
| 1 | -4.21249 |
| 1 | -4.10566 |
| 1 | -4.00745 |
| 1 | -4.03364 |
| 1 | -4.12896 |
| 1 | -4.15145 |
| 1 | -4.15204 |
| 1 | -4.34868 |
| 1 | -4.25423 |
| 1 | -4.10522 |
| 1 | -4.1139  |
| 0 | 4.11985  |

|   |          |
|---|----------|
| 1 | -4.38849 |
| 1 | -4.57743 |
| 1 | -4.57743 |
| 1 | -4.10182 |
| 1 | -4.19832 |
| 0 | 4.01243  |
| 0 | 4.01243  |
| 1 | -4.10116 |
| 1 | -4.29516 |
| 1 | -3.95605 |
| 1 | -4.35283 |
| 1 | -4.35283 |
| 0 | 4.15192  |
| 0 | 3.9321   |
| 0 | 4.4486   |
| 1 | -4.19493 |
| 1 | -4.13255 |
| 1 | -4.00287 |
| 1 | -4.4129  |
| 1 | -3.9985  |
| 0 | 4.02073  |
| 1 | -4.0079  |
| 1 | -4.04291 |
| 1 | -4.00508 |
| 1 | -4.14853 |
| 1 | -4.371   |
| 1 | -4.371   |
| 0 | 4.05601  |
| 1 | -4.1286  |
| 1 | -4.1286  |
| 1 | -4.05003 |
| 1 | -4.05003 |
| 1 | -4.27416 |
| 0 | 4.17976  |
| 1 | -4.29887 |
| 1 | -4.25768 |
| 1 | -4.25768 |
| 1 | -4.05603 |
| 1 | -4.04757 |
| 1 | -4.06516 |
| 1 | -4.05212 |
| 1 | -4.06206 |
| 1 | -4.11429 |
| 1 | -4.19114 |
| 1 | -4.14899 |
| 1 | -4.10106 |
| 1 | -4.00428 |

|   |          |
|---|----------|
| 1 | -4.14229 |
| 0 | 4.06594  |
| 0 | 4.0271   |
| 0 | 4.0271   |
| 1 | -4.14286 |
| 1 | -4.14286 |
| 0 | 4.03139  |
| 0 | 3.96048  |
| 1 | -4.13177 |
| 1 | -4.23257 |
| 0 | 4.03733  |
| 0 | 4.48616  |
| 0 | 4.17585  |
| 1 | -4.1004  |
| 0 | 4.04853  |
| 0 | 4.27506  |
| 0 | 4.04093  |
| 0 | 4.14181  |
| 0 | 4.29194  |
| 0 | 4.44109  |
| 0 | 4.04341  |
| 0 | 4.07068  |
| 0 | 4.02693  |
| 0 | 3.97871  |
| 1 | -4.08397 |
| 1 | -3.981   |
| 1 | -4.28095 |
| 1 | -4.28095 |
| 1 | -4.05481 |
| 1 | -4.05481 |
| 1 | -4.17209 |
| 1 | -4.02633 |
| 1 | -4.19066 |
| 0 | 4.10474  |
| 1 | -4.11656 |
| 1 | -4.55279 |
| 1 | -4.41109 |
| 0 | 4.06518  |
| 1 | -4.18584 |
| 1 | -4.07891 |
| 0 | 4.14737  |
| 1 | -4.23795 |
| 1 | -4.23795 |
| 1 | -4.12748 |
| 1 | -4.12748 |
| 1 | -4.12075 |
| 0 | 4.00671  |

|   |          |
|---|----------|
| 0 | 3.93636  |
| 0 | 3.99192  |
| 1 | -4.00751 |
| 0 | 4.28129  |
| 0 | 4.13561  |
| 0 | 4.09343  |
| 1 | -4.03021 |
| 0 | 3.94409  |
| 1 | -4.15549 |
| 0 | 4.08573  |
| 1 | -4.56192 |
| 1 | -4.56192 |
| 1 | -4.00438 |
| 1 | -4.02713 |
| 0 | 4.30289  |
| 1 | -4.14939 |
| 1 | -4.0045  |
| 1 | -4.09343 |
| 1 | -4.09343 |
| 0 | 3.96066  |
| 0 | 4.07969  |
| 0 | 4.10225  |
| 0 | 3.99578  |
| 1 | -4.22296 |
| 1 | -4.17709 |
| 0 | 4.09584  |
| 0 | 4.36835  |
| 0 | 4.24727  |
| 0 | 4.28992  |
| 0 | 4.12903  |
| 0 | 4.06487  |
| 0 | 4.05098  |
| 0 | 3.97746  |
| 1 | -4.2198  |
| 0 | 4.06409  |
| 0 | 4.08062  |
| 0 | 3.96851  |
| 0 | 4.0977   |
| 0 | 4.09203  |
| 0 | 4.33092  |
| 0 | 4.04241  |
| 1 | -3.99401 |
| 0 | 4.11008  |
| 1 | -4.09191 |
| 0 | 4.04041  |
| 1 | -4.40022 |
| 1 | -4.40022 |

|   |          |
|---|----------|
| 0 | 4.37601  |
| 1 | -4.05198 |
| 1 | -4.01505 |
| 0 | 4.13124  |
| 1 | -4.19668 |
| 1 | -4.03633 |
| 0 | 4.02751  |
| 1 | -4.38625 |
| 1 | -4.38625 |
| 1 | -4.01815 |
| 0 | 4.02191  |
| 1 | -4.10544 |
| 1 | -4.1855  |
| 1 | -4.06797 |
| 0 | 4.21734  |
| 1 | -4.09688 |
| 1 | -4.25675 |
| 1 | -4.24013 |
| 0 | 4.15715  |
| 0 | 4.01762  |
| 1 | -4.15474 |
| 1 | -4.14748 |
| 0 | 4.32889  |
| 0 | 3.91441  |
| 0 | 4.04366  |
| 0 | 4.36942  |
| 0 | 3.96362  |
| 1 | -4.17888 |
| 1 | -4.08124 |
| 0 | 4.18333  |
| 0 | 3.99154  |
| 0 | 3.94573  |
| 1 | -4.47538 |
| 1 | -4.54152 |
| 0 | 4.02277  |
| 1 | -3.96945 |
| 1 | -3.96945 |
| 1 | -4.25572 |
| 1 | -4.01811 |
| 1 | -4.0108  |
| 0 | 4.43923  |
| 1 | -4.09567 |
| 0 | 4.34661  |
| 0 | 4.48041  |
| 0 | 4.02398  |
| 0 | 3.93206  |
| 0 | 4.07655  |



|   |          |
|---|----------|
| 1 | -4.02076 |
| 0 | 4.30167  |
| 1 | -4.09844 |
| 0 | 4.31344  |
| 1 | -4.1747  |
| 0 | 4.2532   |
| 0 | 4.2532   |
| 1 | -4.42291 |
| 0 | 4.07133  |
| 1 | -4.24732 |
| 1 | -4.08535 |
| 0 | 4.04217  |
| 1 | -4.57326 |
| 1 | -3.97088 |
| 0 | 3.99239  |
| 0 | 3.99239  |
| 0 | 4.07417  |
| 0 | 4.01174  |
| 1 | -4.0048  |
| 1 | -4.05603 |
| 1 | -4.03156 |
| 1 | -4.3936  |
| 1 | -4.38822 |
| 1 | -3.97127 |
| 1 | -4.17355 |
| 1 | -4.1223  |
| 1 | -3.95749 |
| 1 | -4.19703 |
| 1 | -4.44155 |
| 1 | -4.04402 |
| 1 | -4.05304 |
| 0 | 4.26154  |
| 1 | -4.06694 |
| 1 | -4.1098  |
| 1 | -4.1098  |
| 1 | -4.15794 |
| 1 | -4.00772 |
| 0 | 4.04612  |
| 1 | -4.15274 |
| 1 | -4.13102 |
| 0 | 4.23152  |
| 1 | -4.15681 |
| 1 | -4.03982 |
| 1 | -4.26656 |
| 1 | -4.19373 |
| 0 | 4.05964  |
| 1 | -4.08931 |

|   |          |
|---|----------|
| 0 | 4.4305   |
| 1 | -4.2475  |
| 1 | -4.2475  |
| 1 | -4.19168 |
| 1 | -4.19168 |
| 1 | -4.10468 |
| 1 | -4.11671 |
| 0 | 3.91807  |
| 1 | -4.37699 |
| 0 | 4.10198  |
| 0 | 3.93026  |
| 0 | 4.15564  |
| 1 | -4.49777 |
| 1 | -4.08516 |
| 1 | -4.21661 |
| 1 | -4.18672 |
| 0 | 4.27113  |
| 0 | 4.18661  |
| 0 | 3.93501  |
| 1 | -4.15673 |
| 1 | -4.19163 |
| 0 | 4.07552  |
| 0 | 3.99158  |
| 0 | 3.99158  |
| 1 | -4.53492 |
| 1 | -4.1018  |
| 0 | 4.14573  |
| 0 | 4.07042  |
| 0 | 4.07042  |
| 1 | -4.09096 |
| 1 | -4.2003  |
| 1 | -4.02051 |
| 1 | -4.36634 |
| 1 | -4.36634 |
| 0 | 4.25244  |
| 0 | 4.35469  |
| 0 | 4.24333  |
| 0 | 4.02026  |
| 0 | 4.05989  |
| 0 | 4.09198  |
| 1 | -4.19056 |
| 0 | 4.2684   |
| 1 | -4.03731 |
| 1 | -4.15213 |
| 0 | 4.29321  |
| 0 | 4.43713  |
| 0 | 4.43713  |

|   |          |
|---|----------|
| 1 | -4.47447 |
| 0 | 4.00767  |
| 0 | 4.00767  |
| 0 | 4.06745  |
| 0 | 4.10646  |
| 1 | -4.02957 |
| 1 | -4.03425 |
| 1 | -4.03425 |
| 1 | -4.00709 |
| 1 | -4.16734 |
| 1 | -4.0052  |
| 0 | 4.0708   |
| 0 | 4.17176  |
| 1 | -3.96176 |
| 0 | 4.10791  |
| 1 | -4.14753 |
| 0 | 4.17469  |
| 0 | 4.27917  |
| 1 | -3.97287 |
| 0 | 4.07026  |
| 0 | 4.27546  |
| 0 | 3.96933  |
| 0 | 4.10954  |
| 0 | 4.20786  |
| 1 | -4.00469 |
| 1 | -4.55584 |
| 1 | -4.02589 |
| 1 | -4.05363 |
| 0 | 4.33329  |
| 0 | 4.07377  |
| 0 | 4.12476  |
| 0 | 4.17463  |
| 0 | 4.48231  |
| 1 | -4.03772 |
| 0 | 4.07516  |
| 1 | -4.45053 |
| 1 | -4.05788 |
| 1 | -4.05177 |
| 1 | -3.95155 |
| 0 | 3.92455  |
| 1 | -4.26179 |
| 1 | -4.13917 |
| 1 | -4.09622 |
| 0 | 4.40153  |
| 0 | 4.07322  |
| 0 | 4.02145  |
| 1 | -4.08237 |

|   |          |
|---|----------|
| 1 | -4.09443 |
| 0 | 4.20006  |
| 0 | 3.97768  |
| 0 | 4.27893  |
| 1 | -4.00167 |
| 1 | -4.2771  |
| 1 | -4.05701 |
| 1 | -4.18193 |
| 1 | -3.97154 |
| 1 | -4.18793 |
| 1 | -4.40998 |
| 0 | 4.01383  |
| 0 | 4.01383  |
| 1 | -4.01066 |
| 1 | -4.01066 |
| 1 | -4.01393 |
| 1 | -4.03322 |
| 1 | -4.09437 |
| 1 | -4.38947 |
| 1 | -3.9742  |
| 0 | 4.12086  |
| 0 | 4.13072  |
| 0 | 4.1223   |
| 1 | -3.96356 |
| 0 | 4.13901  |
| 1 | -4.3101  |
| 0 | 4.12237  |
| 1 | -4.241   |
| 0 | 4.11245  |
| 0 | 4.0062   |
| 0 | 4.3645   |
| 0 | 4.0441   |
| 0 | 4.36298  |
| 0 | 4.38316  |
| 0 | 3.99593  |
| 0 | 4.07458  |
| 0 | 4.12832  |
| 0 | 4.03551  |
| 1 | -4.05383 |
| 1 | -3.9593  |
| 0 | 4.01955  |
| 1 | -4.00193 |
| 1 | -4.00193 |
| 1 | -4.16238 |
| 1 | -4.16238 |
| 1 | -4.02277 |
| 1 | -4.02277 |

|   |          |
|---|----------|
| 0 | 4.26921  |
| 0 | 4.06566  |
| 0 | 4.28098  |
| 0 | 3.97745  |
| 0 | 4.19508  |
| 1 | -4.28487 |
| 0 | 4.14229  |
| 0 | 4.03259  |
| 1 | -4.35572 |
| 1 | -4.35572 |
| 1 | -4.24034 |
| 1 | -4.17892 |
| 0 | 3.92812  |
| 1 | -3.99935 |
| 0 | 4.39013  |
| 0 | 4.00286  |
| 0 | 4.0568   |
| 1 | -4.15175 |
| 1 | -4.07635 |
| 1 | -4.31334 |
| 1 | -4.19538 |
| 0 | 3.97153  |
| 1 | -4.12823 |
| 0 | 4.02271  |
| 0 | 4.15068  |
| 0 | 4.15068  |
| 1 | -4.22483 |
| 1 | -4.39852 |
| 0 | 4.12243  |
| 1 | -4.04956 |
| 0 | 3.92889  |
| 0 | 3.91949  |
| 0 | 4.38145  |
| 0 | 4.15986  |
| 0 | 4.08205  |
| 0 | 4.35263  |
| 0 | 3.98469  |
| 1 | -4.20244 |
| 1 | -4.24131 |
| 0 | 4.05356  |
| 0 | 4.06608  |
| 1 | -4.08897 |
| 1 | -4.24305 |
| 0 | 4.17125  |
| 0 | 4.0988   |
| 0 | 4.28371  |
| 0 | 4.10517  |

|   |          |
|---|----------|
| 0 | 4.0107   |
| 0 | 4.34682  |
| 0 | 4.13352  |
| 0 | 4.39022  |
| 1 | -3.96652 |
| 1 | -3.95677 |
| 1 | -4.25877 |
| 0 | 3.94901  |
| 1 | -4.10831 |
| 0 | 4.21643  |
| 0 | 4.05335  |
| 1 | -3.94778 |
| 1 | -4.1607  |
| 1 | -4.0942  |
| 1 | -4.14756 |
| 1 | -4.24018 |
| 1 | -4.47681 |
| 1 | -3.97167 |
| 1 | -4.39478 |
| 0 | 4.24876  |
| 0 | 4.06467  |
| 1 | -4.19401 |
| 0 | 3.97646  |
| 1 | -4.09701 |
| 0 | 3.97825  |
| 0 | 4.22767  |
| 1 | -4.57213 |
| 0 | 4.12109  |
| 1 | -4.02172 |
| 1 | -4.03517 |
| 1 | -3.99411 |
| 1 | -4.30458 |
| 1 | -4.20417 |
| 1 | -4.20417 |
| 0 | 4.17025  |
| 1 | -4.13293 |
| 0 | 3.98558  |
| 0 | 4.24101  |
| 1 | -3.97716 |
| 0 | 4.26495  |
| 1 | -3.98746 |
| 1 | -4.3639  |
| 0 | 4.11683  |
| 0 | 4.46104  |
| 1 | -4.32743 |
| 0 | 4.40976  |
| 1 | -4.21612 |

|   |          |
|---|----------|
| 1 | -4.1236  |
| 1 | -4.23866 |
| 0 | 4.01527  |
| 1 | -4.14906 |
| 1 | -4.23694 |
| 0 | 3.99172  |
| 1 | -4.03386 |
| 0 | 4.32772  |
| 1 | -4.1506  |
| 1 | -4.1506  |
| 1 | -4.19737 |
| 1 | -4.23014 |
| 0 | 4.11651  |
| 1 | -4.17867 |
| 1 | -4.16336 |
| 0 | 4.04809  |
| 1 | -4.03818 |
| 0 | 4.40991  |
| 1 | -4.01155 |
| 1 | -4.21071 |
| 1 | -4.5234  |
| 1 | -4.25649 |
| 0 | 4.16951  |
| 0 | 4.22273  |
| 1 | -3.98755 |
| 1 | -4.3278  |
| 1 | -3.94854 |
| 1 | -4.02976 |
| 1 | -4.0661  |
| 1 | -3.99652 |
| 1 | -4.34716 |
| 1 | -4.34716 |
| 1 | -4.50741 |
| 0 | 4.07319  |
| 0 | 4.08306  |
| 1 | -4.00778 |
| 1 | -4.02143 |
| 1 | -4.39848 |
| 1 | -4.11064 |
| 1 | -4.0008  |
| 1 | -4.08093 |
| 1 | -4.15156 |
| 1 | -4.15156 |
| 1 | -4.18316 |
| 1 | -4.05306 |
| 1 | -4.25858 |
| 1 | -4.08487 |

|   |          |
|---|----------|
| 1 | -4.42798 |
| 1 | -3.99081 |
| 1 | -3.97839 |
| 1 | -4.30397 |
| 1 | -4.25012 |
| 0 | 4.43508  |
| 1 | -4.48654 |
| 0 | 4.18702  |
| 0 | 4.18702  |
| 1 | -3.96288 |
| 1 | -4.03939 |
| 0 | 4.02776  |
| 0 | 4.06746  |
| 1 | -4.04599 |
| 1 | -4.04599 |
| 1 | -3.95962 |
| 1 | -4.00844 |
| 1 | -4.05727 |
| 1 | -4.08443 |
| 1 | -3.954   |
| 1 | -3.954   |
| 1 | -4.16259 |
| 1 | -4.07079 |
| 1 | -4.05466 |
| 1 | -4.16658 |
| 1 | -4.36171 |
| 1 | -4.43214 |
| 0 | 4.02988  |
| 1 | -4.41007 |
| 0 | 4.33246  |
| 0 | 4.15546  |
| 0 | 4.1192   |
| 1 | -4.21592 |
| 1 | -4.2551  |
| 1 | -4.0069  |
| 0 | 4.03426  |
| 1 | -4.22739 |
| 1 | -4.08054 |
| 1 | -4.39783 |
| 0 | 3.93587  |
| 0 | 4.25129  |
| 1 | -4.43743 |
| 1 | -4.03289 |
| 0 | 4.12626  |
| 1 | -4.09719 |
| 1 | -4.34699 |
| 0 | 4.15047  |



|   |          |
|---|----------|
| 1 | -3.94845 |
| 0 | 4.30578  |
| 0 | 4.1197   |
| 0 | 3.96434  |

ACCEPTED MANUSCRIPT

## Gene List G4+/- H3K9me3

| chromosome | feature start | feature end | feature   | chromosome | region start | region end |
|------------|---------------|-------------|-----------|------------|--------------|------------|
| 1          | 195060346     | 195077006   | NM_144817 | chr1       | 195075899    | 195076493  |
| 1          | 195060346     | 195077006   | NM_144817 | chr1       | 195065762    | 195066577  |
| 1          | 194996718     | 195005466   | NM_008484 | chr1       | 195002655    | 195003436  |
| 1          | 194899680     | 194908210   | NM_153137 | chr1       | 194902170    | 194902822  |
| 1          | 194847836     | 194856385   | NM_016851 | chr1       | 194852954    | 194853655  |
| 1          | 193671990     | 193680652   | NM_023727 | chr1       | 193675224    | 193676041  |
| 1          | 193270377     | 193278894   | NM_178632 | chr1       | 193275826    | 193276430  |
| 1          | 193273590     | 193282149   | NM_029766 | chr1       | 193275826    | 193276430  |
| 1          | 193055070     | 193063569   | BC023062  | chr1       | 193059840    | 193060446  |
| 1          | 192609886     | 192618385   | NM_178775 | chr1       | 192614095    | 192615025  |
| 1          | 192609886     | 192618385   | NM_178775 | chr1       | 192612091    | 192612696  |
| 1          | 188655296     | 188670703   | NM_033077 | chr1       | 188670090    | 188670682  |
| 1          | 187057883     | 187066382   | NM_029735 | chr1       | 187065159    | 187065768  |
| 1          | 187027667     | 187036189   | NM_198653 | chr1       | 187027737    | 187028355  |
| 1          | 186502357     | 186517985   | BC028441  | chr1       | 186514831    | 186515636  |
| 1          | 186430782     | 186439396   | NM_008250 | chr1       | 186432614    | 186433289  |
| 1          | 185729702     | 185738216   | NM_022019 | chr1       | 185735598    | 185736235  |
| 1          | 184152563     | 184161062   | BC078447  | chr1       | 184157551    | 184158154  |
| 1          | 183853775     | 183862332   | NM_010135 | chr1       | 183855786    | 183856617  |
| 1          | 183183303     | 183192176   | NM_028408 | chr1       | 183189636    | 183190236  |
| 1          | 182647779     | 182656278   | NM_008210 | chr1       | 182648259    | 182649160  |
| 1          | 182531210     | 182539709   | NM_013729 | chr1       | 182531312    | 182531921  |
| 1          | 182399648     | 182408149   | NM_007415 | chr1       | 182406525    | 182407175  |
| 1          | 182399648     | 182408149   | NM_007415 | chr1       | 182400240    | 182400856  |
| 1          | 182164726     | 182173225   | NM_199472 | chr1       | 182172567    | 182173182  |
| 1          | 182079936     | 182088576   | NM_011183 | chr1       | 182080643    | 182081405  |
| 1          | 182030144     | 182038687   | NM_023341 | chr1       | 182033099    | 182033669  |
| 2          | 181638371     | 181647608   | NM_011012 | chr2       | 181639230    | 181639609  |
| 2          | 181603716     | 181612277   | NM_009326 | chr2       | 181609686    | 181610323  |
| 1          | 181586585     | 181595084   | BC023122  | chr1       | 181590293    | 181590881  |
| 1          | 181498906     | 181507413   | NM_178653 | chr1       | 181504676    | 181505348  |
| 2          | 180847816     | 180856344   | NM_173761 | chr2       | 180854060    | 180854648  |
| 2          | 180703718     | 180712308   | NM_080641 | chr2       | 180711408    | 180712013  |
| 2          | 180504712     | 180521368   | NM_031373 | chr2       | 180513480    | 180514125  |
| 2          | 180395837     | 180404336   | BC033602  | chr2       | 180402258    | 180402858  |
| 1          | 180359800     | 180368636   | NM_177724 | chr1       | 180367045    | 180367685  |
| 1          | 180359800     | 180368636   | NM_177724 | chr1       | 180365005    | 180366041  |
| 2          | 180261463     | 180270081   | NM_008093 | chr2       | 180268060    | 180268808  |
| 2          | 180031131     | 180039783   | NM_133849 | chr2       | 180036694    | 180037347  |
| 2          | 179995200     | 180003700   | NM_181424 | chr2       | 179995714    | 179996648  |
| 2          | 179995200     | 180003700   | NM_181424 | chr2       | 179994523    | 179995624  |
| 1          | 178047861     | 178056360   | BC100428  | chr1       | 178051578    | 178052177  |
| 1          | 177459754     | 177468263   | NM_010209 | chr1       | 177467794    | 177468410  |
| 1          | 177462868     | 177471367   | NM_133809 | chr1       | 177467794    | 177468410  |

|   |           |           |              |      |           |           |
|---|-----------|-----------|--------------|------|-----------|-----------|
| 1 | 177326566 | 177335175 | NM_011880    | chr1 | 177326649 | 177327281 |
| 1 | 175930135 | 175938634 | NM_001011844 | chr1 | 175936132 | 175936747 |
| 1 | 175872608 | 175889549 | NM_146717    | chr1 | 175874624 | 175875312 |
| 1 | 175100822 | 175109321 | NM_146651    | chr1 | 175104320 | 175104963 |
| 1 | 175100822 | 175109321 | NM_146651    | chr1 | 175101736 | 175102490 |
| 1 | 175061368 | 175069889 | NM_010184    | chr1 | 175063114 | 175063710 |
| 1 | 174965412 | 174973911 | NM_146764    | chr1 | 174966396 | 174967494 |
| 1 | 174306049 | 174323453 | NM_033608    | chr1 | 174312745 | 174313572 |
| 1 | 174171885 | 174180575 | NM_001039484 | chr1 | 174176483 | 174177121 |
| 1 | 174171885 | 174180575 | NM_001039484 | chr1 | 174174201 | 174174817 |
| 1 | 174132151 | 174148391 | NM_178405    | chr1 | 174139064 | 174140051 |
| 2 | 173987164 | 173995663 | AF085738     | chr2 | 173988212 | 173988824 |
| 1 | 173957447 | 173965946 | NM_023041    | chr1 | 173963077 | 173963910 |
| 2 | 173747304 | 173755803 | NM_213733    | chr2 | 173753712 | 173754298 |
| 2 | 173713260 | 173721759 | NM_172675    | chr2 | 173719525 | 173720294 |
| 2 | 173713260 | 173721759 | NM_172675    | chr2 | 173718022 | 173719131 |
| 2 | 173713260 | 173721759 | NM_172675    | chr2 | 173715124 | 173715934 |
| 2 | 173296797 | 173305299 | NM_024436    | chr2 | 173302687 | 173303402 |
| 1 | 173268236 | 173276792 | NM_172647    | chr1 | 173274685 | 173275486 |
| 1 | 173081275 | 173089787 | NM_153064    | chr1 | 173084913 | 173085986 |
| 1 | 172979996 | 172993277 | NM_025321    | chr1 | 172987325 | 172987913 |
| 1 | 172981388 | 172990995 | NM_008623    | chr1 | 172987325 | 172987913 |
| 1 | 172747117 | 172755616 | NM_001029984 | chr1 | 172749240 | 172750135 |
| 2 | 172658852 | 172667396 | NM_019547    | chr2 | 172665656 | 172666413 |
| 2 | 172658852 | 172667396 | NM_019547    | chr2 | 172663586 | 172664316 |
| 2 | 172234819 | 172243459 | NM_009335    | chr2 | 172242084 | 172242789 |
| 2 | 172125783 | 172134341 | NM_025542    | chr2 | 172131396 | 172132044 |
| 2 | 172030814 | 172039321 | NM_025912    | chr2 | 172034157 | 172034603 |
| 1 | 172001126 | 172017621 | NM_133806    | chr1 | 172003453 | 172004125 |
| 2 | 170181633 | 170190132 | NM_001013369 | chr2 | 170184000 | 170184423 |
| 1 | 169520233 | 169528811 | NM_033652    | chr1 | 169524831 | 169525423 |
| 1 | 168516011 | 168524520 | NM_172844    | chr1 | 168516072 | 168516675 |
| 2 | 167915633 | 167924132 | BC115985     | chr2 | 167921001 | 167921614 |
| 2 | 167919085 | 167927584 | NM_010072    | chr2 | 167921001 | 167921614 |
| 1 | 167594455 | 167602954 | NM_011804    | chr1 | 167602185 | 167602791 |
| 2 | 167320711 | 167329210 | NM_023230    | chr2 | 167324420 | 167324984 |
| 1 | 167291883 | 167300536 | NM_027430    | chr1 | 167296248 | 167297358 |
| 2 | 167177850 | 167186349 | NM_030743    | chr2 | 167183552 | 167184529 |
| 2 | 167181569 | 167190079 | NM_170756    | chr2 | 167183552 | 167184529 |
| 1 | 167028496 | 167036995 | NM_145512    | chr1 | 167033788 | 167034509 |
| 1 | 166292169 | 166301030 | NM_009721    | chr1 | 166297942 | 166298945 |
| 1 | 165825588 | 165834119 | NM_027279    | chr1 | 165830034 | 165830650 |
| 1 | 165828940 | 165837456 | NM_201364    | chr1 | 165830034 | 165830650 |
| 2 | 165770250 | 165778749 | BC027238     | chr2 | 165772960 | 165773562 |
| X | 165317556 | 165326055 | BC059027     | chrX | 165318905 | 165319513 |
| 1 | 165146989 | 165156325 | NM_175686    | chr1 | 165154076 | 165154695 |
| 2 | 165076965 | 165085464 | NM_178411    | chr2 | 165077123 | 165077721 |

|   |   |           |           |              |      |           |           |
|---|---|-----------|-----------|--------------|------|-----------|-----------|
| X |   | 165023355 | 165031854 | NM_010797    | chrX | 165028710 | 165029309 |
|   | 2 | 164923425 | 164931924 | NM_174988    | chr2 | 164924876 | 164925758 |
| X |   | 164661197 | 164670399 | NM_008222    | chrX | 164663831 | 164664558 |
|   | 2 | 164600456 | 164608955 | BC062921     | chr2 | 164602861 | 164603591 |
|   | 2 | 164546319 | 164554913 | NM_011125    | chr2 | 164547530 | 164548236 |
|   | 2 | 164468429 | 164476939 | NM_009394    | chr2 | 164476743 | 164477378 |
|   | 2 | 164470762 | 164479725 | NM_133924    | chr2 | 164476743 | 164477378 |
|   | 2 | 164455134 | 164463633 | NM_026785    | chr2 | 164462890 | 164463585 |
|   | 2 | 164146201 | 164154973 | NM_025575    | chr2 | 164149094 | 164149442 |
|   | 2 | 164088399 | 164096898 | NM_009036    | chr2 | 164096357 | 164096956 |
|   | 2 | 164093866 | 164102365 | NM_013592    | chr2 | 164096357 | 164096956 |
|   | 2 | 164018206 | 164026705 | NM_009301    | chr2 | 164023775 | 164024636 |
|   | 2 | 163607625 | 163616124 | NM_183023    | chr2 | 163609215 | 163609938 |
|   | 1 | 162865856 | 162874926 | BC004622     | chr1 | 162870911 | 162871521 |
|   | 1 | 162868419 | 162877512 | NM_173424    | chr1 | 162870911 | 162871521 |
|   | 2 | 162740076 | 162748629 | NM_008652    | chr2 | 162742692 | 162743308 |
|   | 2 | 162616982 | 162625485 | NM_026499    | chr2 | 162622958 | 162623714 |
| X |   | 161852084 | 161860583 | NM_001007577 | chrX | 161854377 | 161855293 |
|   | 1 | 160190438 | 160199003 | NM_207583    | chr1 | 160194458 | 160195163 |
|   | 1 | 160193033 | 160201888 | NM_007495    | chr1 | 160194458 | 160195163 |
|   | 1 | 159289257 | 159297762 | NM_001033284 | chr1 | 159290232 | 159290933 |
| X |   | 159102866 | 159111434 | NM_028842    | chrX | 159110521 | 159111124 |
|   | 1 | 158773709 | 158782276 | NM_023884    | chr1 | 158776218 | 158776802 |
|   | 1 | 158773709 | 158782276 | NM_023884    | chr1 | 158773999 | 158774611 |
|   | 2 | 158480261 | 158488760 | NM_145742    | chr2 | 158485535 | 158486485 |
|   | 2 | 158466849 | 158479006 | NM_027975    | chr2 | 158474866 | 158475459 |
|   | 2 | 158453534 | 158462039 | BC068129     | chr2 | 158459176 | 158459879 |
|   | 2 | 158350839 | 158361078 | NM_153089    | chr2 | 158359824 | 158360465 |
| X |   | 158306154 | 158314704 | NM_009789    | chrX | 158308245 | 158308969 |
| X |   | 158098538 | 158107063 | NM_009031    | chrX | 158106230 | 158106957 |
| X |   | 158098538 | 158107063 | NM_009031    | chrX | 158105337 | 158105952 |
| X |   | 158098538 | 158107063 | NM_009031    | chrX | 158101137 | 158101766 |
|   | 3 | 157857843 | 157866356 | NM_145953    | chr3 | 157862048 | 157862701 |
|   | 2 | 157698302 | 157706801 | NM_029282    | chr2 | 157698945 | 157699531 |
|   | 3 | 157463680 | 157478860 | NM_017381    | chr3 | 157469256 | 157470197 |
|   | 2 | 156893443 | 156901960 | NM_011249    | chr2 | 156895757 | 156896448 |
|   | 1 | 156859329 | 156867854 | NM_010500    | chr1 | 156860503 | 156861391 |
|   | 3 | 156491087 | 156499751 | NM_001039094 | chr3 | 156493584 | 156494215 |
| X |   | 156106118 | 156114754 | NM_011302    | chrX | 156112009 | 156112619 |
| X |   | 155840312 | 155849294 | NM_172783    | chrX | 155846555 | 155847165 |
|   | 2 | 155829785 | 155838284 | NM_025946    | chr2 | 155836813 | 155837433 |
|   | 2 | 155833106 | 155841626 | NM_010911    | chr2 | 155836813 | 155837433 |
|   | 2 | 155785359 | 155795816 | AF345334     | chr2 | 155794826 | 155795455 |
|   | 2 | 155693547 | 155702059 | NM_025516    | chr2 | 155699591 | 155700303 |
|   | 1 | 155630563 | 155639062 | NM_001008426 | chr1 | 155635823 | 155636436 |
|   | 2 | 155460785 | 155469339 | NM_010808    | chr2 | 155463057 | 155463616 |
|   | 2 | 154961885 | 154970404 | NM_025735    | chr2 | 154966533 | 154967289 |

|   |           |           |              |      |           |           |
|---|-----------|-----------|--------------|------|-----------|-----------|
| 4 | 154947780 | 154956288 | NM_145557    | chr4 | 154949797 | 154950243 |
| 4 | 154800118 | 154808651 | NM_026125    | chr4 | 154807293 | 154807982 |
| 4 | 154781631 | 154795304 | NM_021402    | chr4 | 154787509 | 154788346 |
| 1 | 154711319 | 154719818 | NM_175460    | chr1 | 154717684 | 154718270 |
| 1 | 154711319 | 154719818 | NM_175460    | chr1 | 154715784 | 154716374 |
| 1 | 154711319 | 154719818 | NM_175460    | chr1 | 154711634 | 154712258 |
| 4 | 154707367 | 154715882 | NM_028020    | chr4 | 154707001 | 154707590 |
| 4 | 154627175 | 154635674 | NM_001033394 | chr4 | 154631976 | 154632525 |
| 4 | 154542924 | 154551434 | NM_026899    | chr4 | 154548440 | 154549232 |
| 1 | 154522854 | 154531368 | NM_026369    | chr1 | 154528560 | 154529321 |
| 2 | 154476598 | 154485306 | NM_023130    | chr2 | 154482320 | 154483361 |
| 4 | 154400204 | 154408703 | NM_138671    | chr4 | 154402984 | 154403898 |
| 2 | 154258776 | 154267293 | NM_007891    | chr2 | 154260668 | 154261320 |
| 4 | 154239305 | 154247862 | NM_008072    | chr4 | 154241091 | 154241944 |
| 4 | 154087780 | 154096295 | NM_001033134 | chr4 | 154089251 | 154090363 |
| 2 | 153943295 | 153951819 | NM_175167    | chr2 | 153948466 | 153949397 |
| 4 | 153904830 | 153913329 | NM_001042407 | chr4 | 153909962 | 153910746 |
| 3 | 153810391 | 153823629 | AY351591     | chr3 | 153812246 | 153812770 |
| 1 | 153650319 | 153658818 | BC022177     | chr1 | 153651152 | 153651745 |
| 1 | 153511592 | 153520091 | NM_001039644 | chr1 | 153517166 | 153517793 |
| 2 | 153334895 | 153343557 | NM_001003961 | chr2 | 153343043 | 153343740 |
| 2 | 153334895 | 153343557 | NM_001003961 | chr2 | 153340704 | 153341525 |
| 2 | 153001656 | 153010155 | D26077       | chr2 | 153002411 | 153002985 |
| 4 | 152980172 | 152988708 | NM_021499    | chr4 | 152983417 | 152984298 |
| 4 | 152981509 | 152990008 | NM_011642    | chr4 | 152983417 | 152984298 |
| 3 | 152917072 | 152925596 | NM_012028    | chr3 | 152923666 | 152924255 |
| 4 | 152867451 | 152875952 | NM_001033144 | chr4 | 152869137 | 152869790 |
| 1 | 152753154 | 152761653 | NM_001024720 | chr1 | 152759815 | 152760419 |
| 2 | 152647947 | 152656446 | NM_029064    | chr2 | 152653618 | 152654266 |
| 2 | 152372589 | 152382842 | NM_025543    | chr2 | 152376307 | 152376957 |
| 2 | 152354903 | 152363439 | NM_010376    | chr2 | 152362228 | 152362858 |
| 2 | 152228983 | 152237482 | NM_001001444 | chr2 | 152231666 | 152232176 |
| 1 | 152225317 | 152234383 | AB034730     | chr1 | 152226585 | 152227104 |
| 1 | 152149056 | 152157570 | NM_133780    | chr1 | 152155906 | 152156520 |
| 1 | 152150072 | 152161273 | NM_145511    | chr1 | 152155906 | 152156520 |
| 2 | 152101028 | 152109527 | NM_177656    | chr2 | 152103507 | 152104309 |
| 2 | 152103969 | 152112468 | NM_175126    | chr2 | 152103507 | 152104309 |
| 1 | 152025771 | 152037479 | BC086491     | chr1 | 152028868 | 152029424 |
| 1 | 151720951 | 151729502 | NM_008869    | chr1 | 151725076 | 151725719 |
| 3 | 151369273 | 151377829 | NM_133222    | chr3 | 151371479 | 151372004 |
| 4 | 151318780 | 151327280 | NM_010598    | chr4 | 151325812 | 151326405 |
| 4 | 151214373 | 151226792 | BC098195     | chr4 | 151220116 | 151220735 |
| 4 | 151135027 | 151152063 | NM_133788    | chr4 | 151142526 | 151143178 |
| 4 | 151129903 | 151141462 | NM_008237    | chr4 | 151135088 | 151135616 |
| 4 | 151135027 | 151152063 | NM_133788    | chr4 | 151135088 | 151135616 |
| 4 | 151037610 | 151046109 | AB088412     | chr4 | 151038170 | 151038668 |
| 4 | 151015934 | 151024531 | NM_133348    | chr4 | 151017464 | 151018197 |

|   |   |           |           |              |      |           |           |
|---|---|-----------|-----------|--------------|------|-----------|-----------|
|   | 4 | 150996667 | 151005166 | NM_008236    | chr4 | 151003625 | 151004401 |
|   | 4 | 150970172 | 150986125 | NM_207688    | chr4 | 150976165 | 150976828 |
| X |   | 150961539 | 150970041 | BC116312     | chrX | 150966281 | 150966926 |
|   | 4 | 150877134 | 150885636 | NM_028727    | chr4 | 150884824 | 150885410 |
|   | 4 | 150879791 | 150888368 | NM_031867    | chr4 | 150884824 | 150885410 |
|   | 4 | 150877134 | 150885636 | NM_028727    | chr4 | 150876815 | 150877409 |
|   | 4 | 150830268 | 150845979 | NM_172705    | chr4 | 150839925 | 150840532 |
|   | 4 | 150830268 | 150845979 | NM_172705    | chr4 | 150834368 | 150835116 |
| X |   | 150676646 | 150685183 | NM_016764    | chrX | 150678624 | 150679214 |
|   | 2 | 150297465 | 150305983 | NM_027977    | chr2 | 150298164 | 150299098 |
|   | 5 | 150281054 | 150289584 | NM_080468    | chr5 | 150285637 | 150286255 |
|   | 4 | 149885773 | 149894389 | NM_011067    | chr4 | 149886362 | 149887016 |
|   | 6 | 149360236 | 149368950 | NM_009753    | chr6 | 149367409 | 149368020 |
|   | 6 | 149056209 | 149064708 | NM_177192    | chr6 | 149058220 | 149059035 |
|   | 5 | 148859878 | 148869138 | NM_011908    | chr5 | 148864037 | 148864741 |
|   | 4 | 148844431 | 148858823 | NM_173371    | chr4 | 148846801 | 148847402 |
| X |   | 148572761 | 148581260 | NM_173780    | chrX | 148578029 | 148578942 |
|   | 2 | 148460364 | 148468938 | NM_030059    | chr2 | 148467185 | 148467761 |
|   | 2 | 148467450 | 148483324 | NM_030135    | chr2 | 148467185 | 148467761 |
|   | 4 | 148424228 | 148432937 | NM_023051    | chr4 | 148428637 | 148429224 |
|   | 6 | 148161349 | 148175544 | NM_026168    | chr6 | 148168460 | 148169447 |
|   | 2 | 148132477 | 148140985 | NM_010740    | chr2 | 148132927 | 148133737 |
|   | 2 | 148080783 | 148089282 | NM_009219    | chr2 | 148087544 | 148088327 |
|   | 2 | 148080783 | 148089282 | NM_009219    | chr2 | 148085195 | 148085581 |
|   | 5 | 147757638 | 147766137 | BC082547     | chr5 | 147763653 | 147764270 |
|   | 5 | 147757638 | 147766137 | BC082547     | chr5 | 147758513 | 147759143 |
|   | 2 | 147734849 | 147744410 | NM_010446    | chr2 | 147739717 | 147740462 |
|   | 2 | 147734849 | 147744410 | NM_010446    | chr2 | 147735452 | 147736231 |
| X |   | 147138043 | 147146560 | NM_021523    | chrX | 147143327 | 147144082 |
|   | 6 | 146973357 | 146981856 | BC071257     | chr6 | 146974153 | 146975197 |
| X |   | 146855897 | 146864396 | NM_177201    | chrX | 146862855 | 146863653 |
| X |   | 146855897 | 146864396 | NM_177201    | chrX | 146861902 | 146862498 |
|   | 6 | 146839684 | 146848183 | NM_026221    | chr6 | 146841620 | 146842285 |
|   | 6 | 146532090 | 146540929 | NM_138757    | chr6 | 146534546 | 146535325 |
|   | 3 | 146528535 | 146537052 | NM_009474    | chr3 | 146532377 | 146532986 |
|   | 3 | 146531375 | 146539998 | BC075661     | chr3 | 146532377 | 146532986 |
|   | 5 | 146487039 | 146495538 | NM_001008547 | chr5 | 146489893 | 146490578 |
|   | 4 | 146483799 | 146492298 | BC058858     | chr4 | 146486992 | 146487545 |
|   | 4 | 146456730 | 146465229 | NM_145078    | chr4 | 146463013 | 146463814 |
|   | 3 | 146430002 | 146443139 | NM_027617    | chr3 | 146435423 | 146435945 |
|   | 3 | 146431222 | 146439775 | NM_010318    | chr3 | 146435423 | 146435945 |
| X |   | 146355461 | 146363964 | NM_198110    | chrX | 146357918 | 146359036 |
|   | 3 | 146081219 | 146090059 | NM_026656    | chr3 | 146087669 | 146088644 |
|   | 6 | 145820000 | 145828499 | NM_024469    | chr6 | 145820087 | 145821403 |
|   | 2 | 145620225 | 145628745 | NM_175280    | chr2 | 145625808 | 145626587 |
|   | 2 | 145623607 | 145632141 | NM_025820    | chr2 | 145625808 | 145626587 |
|   | 4 | 145528370 | 145536936 | NM_001037926 | chr4 | 145530544 | 145531303 |

|   |   |           |                        |      |           |           |
|---|---|-----------|------------------------|------|-----------|-----------|
|   | 5 | 145426885 | 145435384 BC025045     | chr5 | 145431545 | 145432259 |
|   | 1 | 145396961 | 145405578 NM_020025    | chr1 | 145405087 | 145405537 |
|   | 5 | 145361783 | 145377685 NM_023142    | chr5 | 145374593 | 145375190 |
|   | 5 | 145106524 | 145119072 BC008264     | chr5 | 145113580 | 145114259 |
|   | 4 | 144931384 | 144939883 BC096593     | chr4 | 144936579 | 144937236 |
| X |   | 144929317 | 144937816 NM_001037716 | chrX | 144929785 | 144930746 |
|   | 5 | 144607975 | 144616474 AY169789     | chr5 | 144611216 | 144611822 |
|   | 5 | 144608918 | 144617639 NM_025833    | chr5 | 144611216 | 144611822 |
|   | 7 | 144277615 | 144286127 NM_007803    | chr7 | 144278961 | 144279551 |
|   | 2 | 144213186 | 144221696 NM_029763    | chr2 | 144218689 | 144219279 |
|   | 6 | 144164112 | 144172639 NM_011444    | chr6 | 144168290 | 144168902 |
|   | 4 | 143780509 | 143789008 NM_198662    | chr4 | 143788469 | 143788956 |
|   | 2 | 143718543 | 143727042 NM_207275    | chr2 | 143725052 | 143725637 |
|   | 7 | 143573884 | 143582383 NM_203492    | chr7 | 143574305 | 143574908 |
|   | 5 | 143518841 | 143527346 AF082568     | chr5 | 143522392 | 143523243 |
|   | 7 | 143492763 | 143501262 NM_024290    | chr7 | 143494182 | 143494993 |
|   | 5 | 143488523 | 143497022 NM_029048    | chr5 | 143491964 | 143492637 |
|   | 7 | 143267773 | 143276386 NM_009876    | chr7 | 143271886 | 143272852 |
|   | 2 | 143231620 | 143240347 NM_008792    | chr2 | 143238382 | 143238997 |
| X |   | 143233392 | 143241891 BC109131     | chrX | 143234728 | 143235571 |
|   | 2 | 143231620 | 143240347 NM_008792    | chr2 | 143231972 | 143232561 |
|   | 5 | 143169348 | 143177864 NM_007393    | chr5 | 143169841 | 143170453 |
|   | 4 | 143080267 | 143088766 NM_001005371 | chr4 | 143082953 | 143083566 |
|   | 4 | 143050046 | 143058551 NM_001007077 | chr4 | 143057247 | 143057829 |
|   | 6 | 142918799 | 142927674 NM_011374    | chr6 | 142923976 | 142924572 |
|   | 6 | 142918799 | 142927674 NM_011374    | chr6 | 142918800 | 142919584 |
|   | 7 | 142872758 | 142881257 NM_020285    | chr7 | 142875890 | 142876645 |
|   | 7 | 142856185 | 142864684 NM_133655    | chr7 | 142863541 | 142864557 |
|   | 7 | 142859981 | 142868480 NM_133790    | chr7 | 142863541 | 142864557 |
|   | 5 | 142780001 | 142788550 NM_019943    | chr5 | 142786852 | 142787469 |
|   | 2 | 142763918 | 142772423 NM_020595    | chr2 | 142768820 | 142769266 |
|   | 4 | 142673113 | 142682173 NM_172877    | chr4 | 142678944 | 142679793 |
|   | 6 | 142656941 | 142665537 NM_021041    | chr6 | 142658010 | 142658599 |
|   | 6 | 142462666 | 142471179 NM_008492    | chr6 | 142466183 | 142466788 |
|   | 6 | 142462666 | 142471179 NM_008492    | chr6 | 142463946 | 142464885 |
|   | 7 | 142336507 | 142345006 NM_011288    | chr7 | 142342251 | 142343184 |
|   | 3 | 142326738 | 142339029 NM_019808    | chr3 | 142331697 | 142332734 |
|   | 7 | 142194746 | 142203290 NM_009983    | chr7 | 142197165 | 142198036 |
|   | 7 | 142103960 | 142112459 NM_015808    | chr7 | 142104734 | 142105628 |
|   | 7 | 141897161 | 141910432 NM_008748    | chr7 | 141900722 | 141901477 |
|   | 3 | 141396951 | 141405460 NM_009472    | chr3 | 141401151 | 141401769 |
|   | 7 | 141292976 | 141330256 NM_009842    | chr7 | 141327642 | 141328244 |
|   | 7 | 141213931 | 141222430 NM_177280    | chr7 | 141216904 | 141217678 |
|   | 1 | 141190953 | 141199511 NM_133239    | chr1 | 141192057 | 141192876 |
|   | 3 | 141146663 | 141155742 NM_008811    | chr3 | 141154704 | 141155295 |
|   | 7 | 141042703 | 141051314 NM_008284    | chr7 | 141049234 | 141049862 |
|   | 7 | 141017510 | 141026009 NM_145135    | chr7 | 141023908 | 141024598 |

|   |           |           |              |      |           |           |
|---|-----------|-----------|--------------|------|-----------|-----------|
| 4 | 140992996 | 141001495 | NM_001017966 | chr4 | 140994407 | 140995003 |
| 5 | 140951497 | 140960073 | NM_172724    | chr5 | 140957425 | 140958033 |
| 7 | 140703988 | 140713604 | NM_018742    | chr7 | 140708977 | 140709680 |
| 7 | 140703988 | 140713604 | NM_018742    | chr7 | 140704170 | 140704942 |
| 7 | 140690897 | 140701735 | NM_027019    | chr7 | 140700372 | 140700957 |
| 7 | 140690897 | 140701735 | NM_027019    | chr7 | 140697054 | 140697780 |
| 7 | 140512609 | 140521108 | NM_146961    | chr7 | 140519296 | 140519910 |
| 4 | 140276757 | 140287399 | NM_008546    | chr4 | 140281814 | 140282423 |
| 7 | 140222429 | 140230928 | NM_146519    | chr7 | 140223045 | 140223635 |
| 5 | 140025613 | 140034127 | NM_026748    | chr5 | 140026312 | 140027020 |
| 7 | 140003480 | 140020334 | NM_183147    | chr7 | 140004479 | 140005460 |
| 6 | 139997963 | 140006486 | NM_007605    | chr6 | 140002024 | 140002675 |
| 6 | 140001319 | 140009837 | NM_054066    | chr6 | 140002024 | 140002675 |
| 7 | 139982975 | 139991474 | NM_199301    | chr7 | 139989020 | 139989825 |
| 7 | 139885049 | 139893586 | NM_133755    | chr7 | 139892251 | 139892929 |
| 7 | 139431614 | 139440117 | NM_183248    | chr7 | 139433411 | 139434331 |
| 4 | 139102545 | 139111044 | NM_011039    | chr4 | 139109179 | 139109783 |
| 5 | 139040831 | 139049330 | BC004044     | chr5 | 139041540 | 139042186 |
| 3 | 139009958 | 139018586 | NM_001040690 | chr3 | 139011742 | 139012364 |
| 4 | 138888970 | 138897685 | NM_175438    | chr4 | 138895359 | 138895954 |
| 4 | 138869287 | 138877786 | NM_183148    | chr4 | 138874996 | 138875609 |
| 7 | 138745313 | 138753849 | NM_009760    | chr7 | 138747887 | 138748606 |
| 4 | 138504984 | 138513483 | U10407       | chr4 | 138507710 | 138508316 |
| 4 | 138459007 | 138467554 | NM_001037761 | chr4 | 138464700 | 138465314 |
| 3 | 138457578 | 138467164 | NM_007917    | chr3 | 138464218 | 138464876 |
| 3 | 138424270 | 138432769 | NM_175224    | chr3 | 138426734 | 138427464 |
| 5 | 138395809 | 138404467 | NM_021392    | chr5 | 138396632 | 138397440 |
| 4 | 138233193 | 138251780 | NM_029857    | chr4 | 138244693 | 138245438 |
| 7 | 138231019 | 138242073 | NM_183289    | chr7 | 138234626 | 138235213 |
| 4 | 138097952 | 138106453 | BC045156     | chr4 | 138106297 | 138106875 |
| 5 | 137967287 | 137977395 | NM_175521    | chr5 | 137976043 | 137976791 |
| 5 | 137969784 | 137979217 | NM_023910    | chr5 | 137976043 | 137976791 |
| 5 | 137967287 | 137977395 | NM_175521    | chr5 | 137971282 | 137971793 |
| 5 | 137969784 | 137979217 | NM_023910    | chr5 | 137971282 | 137971793 |
| 1 | 137941812 | 137950331 | NM_001039472 | chr1 | 137947896 | 137948788 |
| 1 | 137772887 | 137785660 | BC107028     | chr1 | 137785640 | 137786263 |
| 5 | 137742656 | 137751167 | NM_031408    | chr5 | 137749702 | 137750690 |
| 5 | 137729632 | 137738219 | NM_028753    | chr5 | 137732243 | 137732840 |
| 4 | 137721262 | 137729761 | NM_025451    | chr4 | 137721745 | 137722639 |
| 4 | 137700748 | 137709278 | NM_026689    | chr4 | 137707870 | 137708471 |
| 4 | 137637532 | 137646036 | NM_028176    | chr4 | 137639794 | 137640556 |
| 5 | 137573897 | 137582717 | NM_010144    | chr5 | 137580327 | 137581140 |
| 5 | 137534922 | 137550029 | NM_031405    | chr5 | 137543412 | 137544022 |
| 1 | 137539608 | 137548150 | NM_007791    | chr1 | 137540785 | 137541644 |
| 4 | 137482711 | 137491237 | NM_010470    | chr4 | 137488206 | 137488907 |
| 1 | 137395184 | 137403683 | NM_175447    | chr1 | 137397974 | 137398876 |
| 1 | 137395184 | 137403683 | NM_175447    | chr1 | 137396928 | 137397538 |



|   |   |           |           |              |      |           |           |
|---|---|-----------|-----------|--------------|------|-----------|-----------|
|   | 5 | 137305019 | 137317421 | NM_001039385 | chr5 | 137313826 | 137314857 |
|   | 5 | 137240713 | 137255006 | NM_021719    | chr5 | 137253265 | 137254315 |
|   | 5 | 137240713 | 137255006 | NM_021719    | chr5 | 137251480 | 137252196 |
|   | 5 | 137165235 | 137173811 | NM_024474    | chr5 | 137165999 | 137166648 |
|   | 1 | 137097946 | 137106445 | NM_145417    | chr1 | 137099587 | 137100184 |
|   | 5 | 136971773 | 136980313 | NM_021611    | chr5 | 136973411 | 136974023 |
| X |   | 136969086 | 136977585 | NM_010572    | chrX | 136972046 | 136972635 |
|   | 4 | 136923662 | 136939343 | BC019125     | chr4 | 136929329 | 136930123 |
|   | 6 | 136883865 | 136892376 | NM_026983    | chr6 | 136884343 | 136884934 |
|   | 7 | 136783617 | 136792116 | M84524       | chr7 | 136785146 | 136785774 |
|   | 5 | 136414781 | 136425907 | NM_028070    | chr5 | 136423200 | 136423640 |
|   | 5 | 136418129 | 136426701 | NM_027891    | chr5 | 136423200 | 136423640 |
|   | 5 | 136273432 | 136282003 | NM_023742    | chr5 | 136279467 | 136280179 |
|   | 1 | 136225878 | 136234390 | NM_028320    | chr1 | 136231054 | 136231656 |
|   | 5 | 136026300 | 136034799 | NM_172541    | chr5 | 136026498 | 136027179 |
| X |   | 136018392 | 136026891 | AF196480     | chrX | 136024330 | 136025155 |
| X |   | 135886460 | 135895549 | NM_010286    | chrX | 135886742 | 135888012 |
|   | 4 | 135872287 | 135887881 | NM_133872    | chr4 | 135874297 | 135875047 |
|   | 1 | 135847926 | 135856452 | NM_021355    | chr1 | 135853996 | 135854802 |
| X |   | 135796977 | 135805536 | NM_021463    | chrX | 135802817 | 135804155 |
|   | 3 | 135756878 | 135766171 | NM_026228    | chr3 | 135765363 | 135766138 |
| X |   | 135403243 | 135411745 | NM_177921    | chrX | 135408792 | 135409905 |
|   | 3 | 135279424 | 135287992 | NM_028946    | chr3 | 135283020 | 135283647 |
|   | 1 | 135249081 | 135257580 | BC007130     | chr1 | 135251304 | 135252168 |
| X |   | 135215474 | 135224018 | NM_029413    | chrX | 135218052 | 135218567 |
| X |   | 135141192 | 135157524 | NM_016675    | chrX | 135148165 | 135148755 |
|   | 4 | 135143396 | 135151903 | NM_026383    | chr4 | 135145579 | 135146372 |
|   | 6 | 135025379 | 135033882 | NM_181444    | chr6 | 135032064 | 135032979 |
|   | 5 | 134970529 | 134979217 | NM_010717    | chr5 | 134972094 | 134972841 |
|   | 4 | 134952600 | 134961099 | NM_174851    | chr4 | 134959241 | 134960061 |
|   | 4 | 134760860 | 134772580 | NM_028995    | chr4 | 134767859 | 134768606 |
|   | 4 | 134762063 | 134770562 | NM_030189    | chr4 | 134767859 | 134768606 |
|   | 4 | 134760860 | 134772580 | NM_028995    | chr4 | 134766230 | 134767207 |
|   | 4 | 134762063 | 134770562 | NM_030189    | chr4 | 134766230 | 134767207 |
| X |   | 134427566 | 134437581 | NM_177920    | chrX | 134427912 | 134428507 |
|   | 4 | 134418572 | 134427071 | AF155880     | chr4 | 134423235 | 134424102 |
|   | 6 | 134356022 | 134364521 | NM_025778    | chr6 | 134361206 | 134361819 |
|   | 4 | 134189699 | 134205555 | NM_023665    | chr4 | 134196999 | 134197617 |
|   | 4 | 133802331 | 133819013 | NM_029759    | chr4 | 133805582 | 133806239 |
|   | 1 | 133784513 | 133800654 | NM_145977    | chr1 | 133798907 | 133799659 |
|   | 4 | 133772876 | 133781375 | BC022922     | chr4 | 133773998 | 133774760 |
|   | 7 | 133538314 | 133553638 | NM_009479    | chr7 | 133540725 | 133541295 |
|   | 4 | 133507941 | 133523604 | NM_024215    | chr4 | 133516959 | 133517885 |
|   | 4 | 133398330 | 133412213 | NM_080559    | chr4 | 133409060 | 133409664 |
|   | 4 | 133398330 | 133412213 | NM_080559    | chr4 | 133400810 | 133401528 |
|   | 2 | 133238640 | 133247139 | NM_007553    | chr2 | 133245763 | 133246413 |
|   | 2 | 133238640 | 133247139 | NM_007553    | chr2 | 133240798 | 133241428 |

|   |   |           |           |              |      |           |           |
|---|---|-----------|-----------|--------------|------|-----------|-----------|
|   | 1 | 133025122 | 133033621 | AY261333     | chr1 | 133030512 | 133031122 |
|   | 4 | 132942174 | 132958882 | NM_178698    | chr4 | 132953173 | 132953980 |
|   | 1 | 132922590 | 132931113 | NM_008551    | chr1 | 132925156 | 132925760 |
|   | 4 | 132871388 | 132879887 | NM_018754    | chr4 | 132877087 | 132877887 |
|   | 7 | 132781965 | 132790464 | NM_207302    | chr7 | 132782001 | 132782703 |
|   | 4 | 132768083 | 132776582 | BC049168     | chr4 | 132768925 | 132769558 |
|   | 1 | 132711043 | 132720885 | NM_053095    | chr1 | 132716733 | 132717390 |
|   | 1 | 132648297 | 132664418 | NM_011082    | chr1 | 132656553 | 132657166 |
|   | 2 | 132607562 | 132616061 | BC029093     | chr2 | 132612015 | 132612701 |
|   | 1 | 132553632 | 132570317 | NM_177604    | chr1 | 132569175 | 132569769 |
|   | 2 | 132532107 | 132541674 | NM_001024385 | chr2 | 132538280 | 132538918 |
|   | 4 | 132478452 | 132495461 | NM_027152    | chr4 | 132482347 | 132482933 |
|   | 4 | 132481434 | 132490583 | NM_008154    | chr4 | 132482347 | 132482933 |
| X |   | 132463985 | 132472690 | NM_007957    | chrX | 132466356 | 132466940 |
|   | 1 | 132454643 | 132463142 | NM_009581    | chr1 | 132461948 | 132462747 |
|   | 4 | 132442447 | 132450946 | AY135643     | chr4 | 132448179 | 132448858 |
|   | 4 | 132002059 | 132010622 | NM_201368    | chr4 | 132006054 | 132006691 |
|   | 4 | 131905122 | 131913693 | NM_010166    | chr4 | 131910777 | 131911364 |
|   | 4 | 131801632 | 131810131 | NM_172400    | chr4 | 131807169 | 131807783 |
|   | 4 | 131803175 | 131811724 | NM_007512    | chr4 | 131807169 | 131807783 |
|   | 4 | 131733423 | 131741922 | NM_026039    | chr4 | 131735643 | 131736228 |
| X |   | 131610691 | 131626368 | NM_009750    | chrX | 131617405 | 131618022 |
|   | 6 | 131256411 | 131264937 | NM_025564    | chr6 | 131262641 | 131263229 |
|   | 6 | 131208574 | 131225742 | NM_008462    | chr6 | 131218026 | 131218791 |
| X |   | 131179420 | 131187931 | BC117923     | chrX | 131184578 | 131185531 |
|   | 4 | 131139732 | 131148254 | BC019437     | chr4 | 131141048 | 131141659 |
|   | 1 | 131095009 | 131103519 | NM_172485    | chr1 | 131095468 | 131096073 |
|   | 2 | 130919508 | 130932675 | NM_144888    | chr2 | 130926018 | 130926959 |
|   | 2 | 130895881 | 130904380 | NM_027129    | chr2 | 130901492 | 130902415 |
|   | 2 | 130863692 | 130884723 | NM_007682    | chr2 | 130864334 | 130864919 |
|   | 7 | 130721378 | 130729891 | NM_019564    | chr7 | 130726273 | 130726923 |
|   | 3 | 130716964 | 130725496 | NM_026724    | chr3 | 130720243 | 130720834 |
|   | 3 | 130600730 | 130609267 | NM_027907    | chr3 | 130606428 | 130607017 |
|   | 5 | 130501128 | 130509627 | BC033455     | chr5 | 130506693 | 130507509 |
|   | 6 | 130343903 | 130358667 | NM_016659    | chr6 | 130345027 | 130345619 |
|   | 8 | 130320799 | 130329298 | BC025186     | chr8 | 130323579 | 130324176 |
| X |   | 130307762 | 130317118 | NM_031259    | chrX | 130310497 | 130311322 |
|   | 6 | 130299015 | 130309319 | NM_010648    | chr6 | 130308484 | 130309197 |
|   | 6 | 130194832 | 130209508 | NM_014194    | chr6 | 130196468 | 130197342 |
|   | 4 | 130179370 | 130187916 | NM_010686    | chr4 | 130185383 | 130185975 |
|   | 3 | 130164033 | 130172871 | NM_198711    | chr3 | 130169451 | 130170037 |
| X |   | 130149374 | 130161585 | NM_026139    | chrX | 130154388 | 130155061 |
| X |   | 130149374 | 130161585 | NM_026139    | chrX | 130152803 | 130153397 |
|   | 6 | 130125806 | 130134306 | NM_001039117 | chr6 | 130130794 | 130131443 |
| X |   | 130090772 | 130103776 | NM_001007578 | chrX | 130097227 | 130097830 |
| X |   | 130096961 | 130107428 | NM_027870    | chrX | 130097227 | 130097830 |
|   | 7 | 130050717 | 130063956 | NM_010207    | chr7 | 130051668 | 130052314 |

|   |    |           |           |              |       |           |           |
|---|----|-----------|-----------|--------------|-------|-----------|-----------|
|   | 2  | 129981380 | 129989879 | NM_152993    | chr2  | 129987057 | 129987885 |
| X |    | 129941609 | 129950135 | NM_019868    | chrX  | 129947323 | 129948088 |
| X |    | 129944794 | 129953309 | NM_013463    | chrX  | 129947323 | 129948088 |
|   | 8  | 129854670 | 129863169 | NM_172762    | chr8  | 129856776 | 129857395 |
|   | 8  | 129829419 | 129837920 | BC099449     | chr8  | 129836390 | 129837009 |
| X |    | 129745187 | 129753769 | NM_010078    | chrX  | 129751238 | 129752133 |
| X |    | 129745187 | 129753769 | NM_010078    | chrX  | 129747472 | 129747997 |
| X |    | 129635575 | 129644172 | NM_026239    | chrX  | 129641512 | 129642512 |
|   | 10 | 129527505 | 129536004 | NM_146674    | chr10 | 129532456 | 129533553 |
|   | 4  | 129481468 | 129489967 | NM_173071    | chr4  | 129488505 | 129489140 |
|   | 6  | 129472597 | 129481096 | BC120661     | chr6  | 129480280 | 129480789 |
| X |    | 129455559 | 129464058 | NM_172203    | chrX  | 129463423 | 129464034 |
|   | 5  | 129440780 | 129449281 | NM_013647    | chr5  | 129443396 | 129444229 |
|   | 2  | 129388775 | 129397274 | NM_018863    | chr2  | 129389233 | 129389802 |
|   | 5  | 129328864 | 129337730 | NM_009391    | chr5  | 129335443 | 129336330 |
|   | 5  | 129328864 | 129337730 | NM_009391    | chr5  | 129334340 | 129335002 |
| X |    | 129325634 | 129334162 | NM_013757    | chrX  | 129327761 | 129328402 |
|   | 6  | 129294975 | 129303474 | NM_199034    | chr6  | 129299990 | 129300339 |
|   | 2  | 129278646 | 129287518 | NM_007547    | chr2  | 129284399 | 129285196 |
|   | 4  | 129242064 | 129250601 | NM_011317    | chr4  | 129244928 | 129245528 |
|   | 4  | 129242064 | 129250601 | NM_011317    | chr4  | 129243999 | 129244593 |
|   | 2  | 129225544 | 129234043 | NM_177653    | chr2  | 129229127 | 129229762 |
|   | 10 | 129192064 | 129200563 | NM_146550    | chr10 | 129193889 | 129194581 |
|   | 6  | 129140214 | 129148753 | NM_053109    | chr6  | 129145954 | 129146617 |
|   | 6  | 129140214 | 129148753 | NM_053109    | chr6  | 129141549 | 129142131 |
|   | 10 | 129123992 | 129132491 | NM_146555    | chr10 | 129130496 | 129131063 |
|   | 10 | 129070967 | 129079466 | NM_146285    | chr10 | 129076446 | 129077036 |
|   | 10 | 129070967 | 129079466 | NM_146285    | chr10 | 129075066 | 129075674 |
|   | 6  | 129005520 | 129014054 | NM_181064    | chr6  | 129010606 | 129011206 |
|   | 4  | 128990542 | 128999074 | NM_080442    | chr4  | 128993207 | 128993815 |
|   | 10 | 128923178 | 128931677 | NM_146930    | chr10 | 128929863 | 128930285 |
|   | 5  | 128909639 | 128918350 | NM_175284    | chr5  | 128915014 | 128915629 |
|   | 10 | 128897762 | 128906261 | NM_146933    | chr10 | 128902024 | 128902598 |
|   | 2  | 128884241 | 128893255 | NM_015747    | chr2  | 128889519 | 128890194 |
|   | 4  | 128686168 | 128694754 | NM_134151    | chr4  | 128691098 | 128691753 |
|   | 4  | 128689287 | 128697963 | NM_029036    | chr4  | 128691098 | 128691753 |
|   | 10 | 128635100 | 128643599 | NM_207620    | chr10 | 128641236 | 128641845 |
|   | 4  | 128462222 | 128470743 | NM_172875    | chr4  | 128463376 | 128464209 |
|   | 10 | 128330762 | 128339266 | NM_008398    | chr10 | 128335429 | 128336035 |
|   | 10 | 128319052 | 128332473 | NM_134006    | chr10 | 128325119 | 128326024 |
|   | 4  | 128255562 | 128264061 | NM_001009819 | chr4  | 128258490 | 128259098 |
|   | 7  | 128249938 | 128258661 | NM_009383    | chr7  | 128252777 | 128253434 |
|   | 4  | 128086652 | 128098266 | NM_177758    | chr4  | 128088429 | 128089080 |
|   | 7  | 128022505 | 128031763 | NM_146205    | chr7  | 128028554 | 128029323 |
|   | 7  | 128022505 | 128031763 | NM_146205    | chr7  | 128027543 | 128028299 |
|   | 10 | 127990102 | 127998601 | NM_010153    | chr10 | 127992195 | 127993040 |
|   | 10 | 127990102 | 127998601 | NM_010153    | chr10 | 127991368 | 127992039 |

|    |           |           |              |       |           |           |
|----|-----------|-----------|--------------|-------|-----------|-----------|
| 10 | 127948194 | 127959521 | NM_134003    | chr10 | 127950838 | 127951423 |
| 5  | 127904096 | 127912601 | NM_133895    | chr5  | 127905657 | 127906300 |
| 10 | 127856243 | 127864742 | NM_198160    | chr10 | 127861484 | 127862091 |
| 2  | 127811479 | 127821515 | NM_207680    | chr2  | 127815902 | 127816848 |
| 10 | 127808606 | 127817108 | NM_026259    | chr10 | 127812002 | 127812596 |
| 10 | 127810246 | 127818745 | NM_027257    | chr10 | 127812002 | 127812596 |
| 3  | 127798387 | 127806886 | BC002199     | chr3  | 127804322 | 127804989 |
| 7  | 127718676 | 127727252 | NM_133351    | chr7  | 127722352 | 127722970 |
| 7  | 127689221 | 127706175 | NM_009739    | chr7  | 127700348 | 127700967 |
| 7  | 127664295 | 127673971 | NM_146259    | chr7  | 127673260 | 127673920 |
| 7  | 127662849 | 127671745 | NM_172749    | chr7  | 127671701 | 127672585 |
| 7  | 127664295 | 127673971 | NM_146259    | chr7  | 127671701 | 127672585 |
| 7  | 127662849 | 127671745 | NM_172749    | chr7  | 127669757 | 127670971 |
| 7  | 127664295 | 127673971 | NM_146259    | chr7  | 127669757 | 127670971 |
| 7  | 127662849 | 127671745 | NM_172749    | chr7  | 127667099 | 127667981 |
| 7  | 127664295 | 127673971 | NM_146259    | chr7  | 127667099 | 127667981 |
| 10 | 127622787 | 127659792 | NM_011589    | chr10 | 127634775 | 127635711 |
| 7  | 127626956 | 127635615 | NM_009294    | chr7  | 127633265 | 127634232 |
| 7  | 127626956 | 127635615 | NM_009294    | chr7  | 127626951 | 127627517 |
| 8  | 127602229 | 127610748 | NM_026855    | chr8  | 127607242 | 127607959 |
| 8  | 127605555 | 127614054 | BC079851     | chr8  | 127607242 | 127607959 |
| 7  | 127565754 | 127580242 | BC049883     | chr7  | 127574697 | 127575295 |
| 7  | 127497286 | 127505914 | NM_009746    | chr7  | 127498115 | 127498682 |
| 7  | 127497884 | 127506391 | NM_007795    | chr7  | 127498115 | 127498682 |
| 7  | 127373928 | 127382431 | NM_172281    | chr7  | 127380516 | 127381116 |
| 7  | 127376825 | 127385743 | NM_001033040 | chr7  | 127380516 | 127381116 |
| 2  | 127272860 | 127281366 | NM_029963    | chr2  | 127272861 | 127273485 |
| 7  | 127175785 | 127190767 | NM_030226    | chr7  | 127183543 | 127184155 |
| 3  | 126987926 | 126996474 | NM_178655    | chr3  | 126992464 | 126993276 |
| 2  | 126955680 | 126964198 | NM_139308    | chr2  | 126961616 | 126962210 |
| 2  | 126897175 | 126905721 | BC117065     | chr2  | 126899585 | 126900181 |
| 10 | 126752052 | 126760721 | NM_008382    | chr10 | 126759463 | 126760060 |
| 10 | 126742029 | 126750538 | NM_010296    | chr10 | 126742641 | 126743455 |
| 7  | 126647120 | 126655619 | NM_172746    | chr7  | 126653197 | 126653820 |
| 7  | 126650112 | 126659510 | NM_153580    | chr7  | 126653197 | 126653820 |
| 7  | 126562123 | 126575130 | NM_011538    | chr7  | 126572238 | 126572829 |
| 7  | 126544774 | 126560820 | NM_011952    | chr7  | 126554141 | 126555014 |
| 8  | 126543211 | 126551710 | BC020060     | chr8  | 126549724 | 126550237 |
| 10 | 126460552 | 126469063 | NM_009870    | chr10 | 126466763 | 126467378 |
| 10 | 126460634 | 126469133 | NM_001033262 | chr10 | 126466763 | 126467378 |
| 2  | 126403486 | 126411985 | AF057146     | chr2  | 126411297 | 126411917 |
| 10 | 126392560 | 126408810 | NM_146012    | chr10 | 126396451 | 126396998 |
| 10 | 126392560 | 126408810 | NM_146012    | chr10 | 126395065 | 126395648 |
| 3  | 126349874 | 126359153 | NM_173451    | chr3  | 126356137 | 126356726 |
| 7  | 126346339 | 126354838 | U67328       | chr7  | 126348500 | 126349092 |
| 8  | 126212803 | 126221302 | NM_172287    | chr8  | 126218539 | 126219111 |
| 8  | 126119800 | 126128323 | NM_030176    | chr8  | 126125391 | 126126062 |

|   |           |           |              |      |           |           |
|---|-----------|-----------|--------------|------|-----------|-----------|
| 4 | 126053271 | 126061828 | NM_175554    | chr4 | 126058827 | 126059646 |
| 8 | 125997464 | 126006064 | NM_170684    | chr8 | 126003807 | 126004575 |
| 2 | 125837635 | 125848481 | NM_026981    | chr2 | 125843232 | 125844033 |
| 4 | 125821174 | 125833612 | NM_011902    | chr4 | 125827063 | 125827774 |
| 4 | 125821174 | 125833612 | NM_011902    | chr4 | 125825535 | 125826151 |
| 4 | 125756088 | 125764587 | NM_144941    | chr4 | 125763931 | 125765046 |
| 4 | 125758709 | 125767217 | NM_013718    | chr4 | 125763931 | 125765046 |
| 4 | 125756088 | 125764587 | NM_144941    | chr4 | 125758523 | 125759463 |
| 4 | 125758709 | 125767217 | NM_013718    | chr4 | 125758523 | 125759463 |
| 5 | 125720925 | 125729442 | NM_203319    | chr5 | 125724333 | 125724977 |
| 5 | 125724944 | 125733508 | NM_029752    | chr5 | 125724333 | 125724977 |
| 8 | 125655595 | 125674481 | NM_144932    | chr8 | 125665788 | 125666530 |
| 4 | 125620018 | 125628517 | AB102946     | chr4 | 125625641 | 125626377 |
| 8 | 125582568 | 125591070 | NM_009824    | chr8 | 125586458 | 125587077 |
| 2 | 125544659 | 125560193 | NM_175154    | chr2 | 125557795 | 125558421 |
| 8 | 125506326 | 125520597 | NM_001007462 | chr8 | 125509285 | 125509868 |
| 5 | 125411380 | 125419879 | AF113001     | chr5 | 125413637 | 125414352 |
| 8 | 125316482 | 125325017 | NM_007806    | chr8 | 125322336 | 125322936 |
| 6 | 125281329 | 125289971 | NM_011324    | chr6 | 125287187 | 125287929 |
| 6 | 125276969 | 125285473 | NM_010736    | chr6 | 125277625 | 125278427 |
| 5 | 125148634 | 125157200 | NM_144819    | chr5 | 125154767 | 125155370 |
| 6 | 125089213 | 125113919 | NM_178787    | chr6 | 125113052 | 125113640 |
| 6 | 125089213 | 125113919 | NM_178787    | chr6 | 125099973 | 125100356 |
| 6 | 125089213 | 125113919 | NM_178787    | chr6 | 125097150 | 125097934 |
| 6 | 124956339 | 124967654 | NM_175696    | chr6 | 124966475 | 124967416 |
| 6 | 124956339 | 124967654 | NM_175696    | chr6 | 124963051 | 124963729 |
| 6 | 124891095 | 124899594 | NM_145385    | chr6 | 124898281 | 124898900 |
| 6 | 124874759 | 124889550 | NM_008479    | chr6 | 124879577 | 124880172 |
| 6 | 124842813 | 124859828 | NM_013488    | chr6 | 124854165 | 124854735 |
| 5 | 124833783 | 124842288 | NM_181410    | chr5 | 124833853 | 124834518 |
| 8 | 124828458 | 124837002 | NM_007608    | chr8 | 124832794 | 124833572 |
| 6 | 124803395 | 124811894 | NM_013530    | chr6 | 124807049 | 124807592 |
| 6 | 124777267 | 124786031 | NM_009415    | chr6 | 124777272 | 124778143 |
| 6 | 124732629 | 124741128 | NM_013509    | chr6 | 124733891 | 124734795 |
| 4 | 124482734 | 124491233 | NM_138683    | chr4 | 124490247 | 124490853 |
| 8 | 124483284 | 124496574 | BC009020     | chr8 | 124486807 | 124487674 |
| 4 | 124482734 | 124491233 | NM_138683    | chr4 | 124484041 | 124484637 |
| 8 | 124470510 | 124479036 | NM_026160    | chr8 | 124477097 | 124477810 |
| 8 | 124470510 | 124479036 | NM_026160    | chr8 | 124472202 | 124473200 |
| 4 | 124436670 | 124445207 | NM_026560    | chr4 | 124442938 | 124443361 |
| 4 | 124377203 | 124386658 | NM_177671    | chr4 | 124384268 | 124384912 |
| 5 | 124366953 | 124379258 | NM_025671    | chr5 | 124375245 | 124375849 |
| 6 | 124320189 | 124328688 | BC120816     | chr6 | 124320545 | 124321215 |
| 2 | 124295737 | 124304942 | NM_172537    | chr2 | 124300037 | 124301087 |
| 4 | 124153956 | 124162455 | NM_011141    | chr4 | 124160128 | 124160967 |
| 5 | 124007491 | 124016030 | NM_001005523 | chr5 | 124010077 | 124010704 |
| 9 | 123944982 | 123956972 | NM_009915    | chr9 | 123954926 | 123955543 |

|    |           |           |              |       |           |           |
|----|-----------|-----------|--------------|-------|-----------|-----------|
| 9  | 123944982 | 123956972 | NM_009915    | chr9  | 123949749 | 123950345 |
| 9  | 123563752 | 123572321 | NM_033322    | chr9  | 123566207 | 123566806 |
| 8  | 123551546 | 123560089 | NM_010926    | chr8  | 123557786 | 123558431 |
| 14 | 123325583 | 123334082 | NM_010201    | chr14 | 123326060 | 123326815 |
| 6  | 123221736 | 123230315 | NM_010819    | chr6  | 123223932 | 123224625 |
| 9  | 123106988 | 123115487 | NM_001002267 | chr9  | 123108750 | 123109802 |
| 4  | 122823420 | 122831919 | NM_022033    | chr4  | 122824876 | 122825480 |
| 6  | 122779803 | 122788629 | NM_021899    | chr6  | 122788285 | 122788668 |
| 4  | 122779214 | 122788166 | NM_130881    | chr4  | 122784026 | 122784694 |
| 5  | 122760002 | 122768791 | NM_009722    | chr5  | 122763483 | 122764156 |
| 5  | 122609030 | 122617540 | NM_019780    | chr5  | 122614520 | 122615220 |
| 3  | 122553462 | 122566788 | NM_153118    | chr3  | 122562434 | 122563248 |
| 10 | 122476588 | 122485565 | NM_153395    | chr10 | 122479273 | 122479879 |
| 4  | 122460963 | 122469490 | NM_029662    | chr4  | 122465464 | 122466078 |
| 1  | 122424227 | 122432726 | NM_010133    | chr1  | 122424294 | 122424899 |
| 2  | 122391406 | 122400104 | NM_011774    | chr2  | 122393514 | 122394480 |
| 8  | 122385176 | 122393675 | NM_001009950 | chr8  | 122390692 | 122391313 |
| 8  | 122385176 | 122393675 | NM_001009950 | chr8  | 122389747 | 122390244 |
| 6  | 122268629 | 122277220 | NM_010749    | chr6  | 122273941 | 122274531 |
| 3  | 122260436 | 122268935 | NM_153806    | chr3  | 122261694 | 122262049 |
| 3  | 122231614 | 122240467 | NM_008129    | chr3  | 122237634 | 122238406 |
| 9  | 122194314 | 122202942 | NM_026179    | chr9  | 122200266 | 122200883 |
| 1  | 122162128 | 122170627 | NM_207233    | chr1  | 122169944 | 122170556 |
| 1  | 122098235 | 122106734 | AY214462     | chr1  | 122098637 | 122099587 |
| 2  | 122055770 | 122066359 | NM_001013829 | chr2  | 122057617 | 122058220 |
| 7  | 122004644 | 122013143 | NM_027363    | chr7  | 122009542 | 122010098 |
| 3  | 121953889 | 121962388 | BC052858     | chr3  | 121961765 | 121962329 |
| 5  | 121803409 | 121812509 | NM_010765    | chr5  | 121806019 | 121806615 |
| 5  | 121779813 | 121788312 | NM_172126    | chr5  | 121781280 | 121781884 |
| 3  | 121709560 | 121718203 | NM_010171    | chr3  | 121715853 | 121716774 |
| 5  | 121710592 | 121719091 | NM_026129    | chr5  | 121711772 | 121712400 |
| 14 | 121598340 | 121606857 | NM_022987    | chr14 | 121604096 | 121604709 |
| 14 | 121604564 | 121613114 | NM_009574    | chr14 | 121604096 | 121604709 |
| 11 | 121486715 | 121495243 | NM_178664    | chr11 | 121488843 | 121489447 |
| 10 | 121447869 | 121456368 | BC120893     | chr10 | 121450339 | 121451263 |
| 11 | 121332893 | 121341392 | NM_178763    | chr11 | 121338537 | 121339222 |
| 9  | 121209666 | 121218213 | BC058971     | chr9  | 121215053 | 121215637 |
| 2  | 121192211 | 121204702 | BC094676     | chr2  | 121193397 | 121193992 |
| 8  | 121163722 | 121172273 | NM_019707    | chr8  | 121167983 | 121168358 |
| 2  | 121134669 | 121151036 | NM_011354    | chr2  | 121141157 | 121141877 |
| 5  | 121066900 | 121079131 | NM_033541    | chr5  | 121072541 | 121073220 |
| 5  | 121067255 | 121075797 | NM_011853    | chr5  | 121072541 | 121073220 |
| 6  | 121044710 | 121053209 | NM_153396    | chr6  | 121051658 | 121052189 |
| 5  | 120953521 | 120962020 | U38252       | chr5  | 120957617 | 120958042 |
| 11 | 120932268 | 120940767 | NM_027622    | chr11 | 120938450 | 120939119 |
| 2  | 120917538 | 120926037 | BC035206     | chr2  | 120922278 | 120922826 |
| 2  | 120917538 | 120926037 | BC035206     | chr2  | 120919440 | 120920769 |

|    |           |           |              |       |           |           |
|----|-----------|-----------|--------------|-------|-----------|-----------|
| 2  | 120859166 | 120868566 | BC103777     | chr2  | 120861674 | 120862687 |
| 9  | 120776173 | 120784769 | NM_007614    | chr9  | 120781657 | 120782253 |
| 5  | 120765809 | 120774368 | NM_133221    | chr5  | 120771451 | 120772224 |
| 11 | 120758574 | 120767656 | NM_030696    | chr11 | 120764677 | 120765345 |
| 11 | 120746463 | 120754962 | NM_027745    | chr11 | 120749116 | 120749622 |
| 14 | 120714116 | 120722615 | BC009134     | chr14 | 120716392 | 120717032 |
| 2  | 120662503 | 120671002 | NM_175285    | chr2  | 120668435 | 120669223 |
| 11 | 120594365 | 120603104 | NM_145370    | chr11 | 120596767 | 120597867 |
| 11 | 120597793 | 120606294 | NM_009053    | chr11 | 120596767 | 120597867 |
| 4  | 120530967 | 120539761 | NM_007741    | chr4  | 120536981 | 120537598 |
| 10 | 120480815 | 120489314 | BC004048     | chr10 | 120486926 | 120487553 |
| 7  | 120458900 | 120467492 | NM_001040136 | chr7  | 120461659 | 120462234 |
| 6  | 120456927 | 120465578 | NM_033567    | chr6  | 120457683 | 120458490 |
| 1  | 120449491 | 120457999 | NM_023755    | chr1  | 120456089 | 120456737 |
| 6  | 120422853 | 120431352 | NM_008359    | chr6  | 120428836 | 120429436 |
| 11 | 120408527 | 120417268 | NM_001038230 | chr11 | 120413936 | 120414543 |
| 11 | 120411956 | 120420547 | NM_011568    | chr11 | 120413936 | 120414543 |
| 11 | 120386444 | 120403692 | NM_133796    | chr11 | 120394251 | 120394933 |
| 11 | 120294746 | 120310508 | NM_013770    | chr11 | 120307470 | 120308086 |
| 11 | 120294746 | 120310508 | NM_013770    | chr11 | 120299744 | 120300363 |
| 11 | 120264280 | 120280153 | NM_012065    | chr11 | 120266376 | 120266994 |
| 11 | 120266005 | 120276727 | NM_152807    | chr11 | 120266376 | 120266994 |
| 2  | 120252756 | 120261272 | NM_011743    | chr2  | 120258783 | 120259493 |
| 2  | 120253112 | 120261661 | NM_009222    | chr2  | 120258783 | 120259493 |
| 6  | 120257679 | 120266178 | NM_198884    | chr6  | 120258275 | 120259058 |
| 2  | 120228788 | 120237287 | U59739       | chr2  | 120229693 | 120230321 |
| 11 | 120162048 | 120170582 | M21495       | chr11 | 120163357 | 120164154 |
| 2  | 120093031 | 120101536 | NM_173734    | chr2  | 120095058 | 120096040 |
| 7  | 119990599 | 119999137 | NM_016669    | chr7  | 119998031 | 119998619 |
| 8  | 119876927 | 119885430 | NM_026572    | chr8  | 119880067 | 119880641 |
| 8  | 119862363 | 119870936 | NM_027103    | chr8  | 119864292 | 119864909 |
| 2  | 119712947 | 119725825 | BC098210     | chr2  | 119716520 | 119717194 |
| 6  | 119507398 | 119515937 | BC051406     | chr6  | 119509399 | 119510002 |
| 11 | 119413788 | 119422399 | NM_028898    | chr11 | 119418831 | 119419433 |
| 7  | 119247917 | 119256421 | NM_025989    | chr7  | 119255623 | 119256232 |
| 10 | 119216449 | 119225071 | NM_028736    | chr10 | 119222182 | 119223164 |
| 11 | 119165647 | 119174146 | NM_178743    | chr11 | 119171276 | 119172036 |
| 11 | 119169101 | 119177628 | NM_018822    | chr11 | 119171276 | 119172036 |
| 4  | 119129647 | 119138169 | NM_008190    | chr4  | 119137003 | 119137612 |
| 4  | 119026915 | 119042701 | NM_001004178 | chr4  | 119037113 | 119037908 |
| 4  | 119031620 | 119040119 | NM_172699    | chr4  | 119037113 | 119037908 |
| 11 | 118899702 | 118908231 | NM_007625    | chr11 | 118904381 | 118904996 |
| 11 | 118899702 | 118908231 | NM_007625    | chr11 | 118903365 | 118904253 |
| 9  | 118895476 | 118914645 | NM_011700    | chr9  | 118901328 | 118902027 |
| 11 | 118854454 | 118863003 | NM_013926    | chr11 | 118855535 | 118856693 |
| 11 | 118833119 | 118841618 | NM_007623    | chr11 | 118838044 | 118838728 |
| 9  | 118769174 | 118778048 | NM_133710    | chr9  | 118776088 | 118776703 |

|   |    |           |           |              |       |           |           |
|---|----|-----------|-----------|--------------|-------|-----------|-----------|
|   | 13 | 118715981 | 118724480 | NM_010408    | chr13 | 118721608 | 118722209 |
|   | 4  | 118453510 | 118462398 | NM_133892    | chr4  | 118460749 | 118461333 |
|   | 6  | 118418626 | 118427125 | NM_028335    | chr6  | 118420278 | 118420874 |
|   | 4  | 118360715 | 118369214 | NM_001011856 | chr4  | 118366875 | 118367482 |
|   | 9  | 118320910 | 118329541 | NM_010136    | chr9  | 118325726 | 118326695 |
|   | 4  | 118305295 | 118313794 | NM_207703    | chr4  | 118313123 | 118313702 |
|   | 14 | 118267483 | 118276021 | NM_015820    | chr14 | 118272941 | 118273524 |
|   | 4  | 118218181 | 118234962 | NM_146304    | chr4  | 118222708 | 118223308 |
|   | 4  | 118157451 | 118165950 | NM_146315    | chr4  | 118162237 | 118162825 |
|   | 13 | 118142169 | 118150818 | BC021881     | chr13 | 118148621 | 118149219 |
|   | 13 | 118142169 | 118150818 | BC021881     | chr13 | 118143463 | 118144159 |
|   | 4  | 118037733 | 118047660 | NM_172383    | chr4  | 118041474 | 118042151 |
|   | 13 | 117996116 | 118004615 | BC022679     | chr13 | 118001829 | 118002425 |
|   | 9  | 117883197 | 117891881 | NM_013727    | chr9  | 117889565 | 117890189 |
|   | 6  | 117866407 | 117874934 | NM_133834    | chr6  | 117873654 | 117874265 |
|   | 6  | 117822696 | 117839330 | NM_001001792 | chr6  | 117829011 | 117830023 |
|   | 11 | 117807535 | 117823957 | AF411101     | chr11 | 117817949 | 117818542 |
|   | 11 | 117781163 | 117791276 | NM_007707    | chr11 | 117783605 | 117784190 |
|   | 11 | 117683402 | 117695616 | NM_027919    | chr11 | 117689406 | 117690003 |
|   | 11 | 117636014 | 117644513 | NM_027827    | chr11 | 117641018 | 117641657 |
|   | 11 | 117639402 | 117648043 | NM_009387    | chr11 | 117641018 | 117641657 |
|   | 5  | 117546077 | 117554617 | U43206       | chr5  | 117547822 | 117548645 |
|   | 5  | 117374391 | 117382976 | NM_178622    | chr5  | 117376981 | 117377571 |
|   | 14 | 117117055 | 117126137 | NM_177753    | chr14 | 117117401 | 117118457 |
|   | 9  | 117098122 | 117107180 | NM_178660    | chr9  | 117098930 | 117099833 |
|   | 2  | 117031659 | 117040318 | NM_011246    | chr2  | 117036690 | 117037300 |
|   | 14 | 116931728 | 116940531 | NM_010024    | chr14 | 116934449 | 116935046 |
|   | 11 | 116925328 | 116933838 | NM_028777    | chr11 | 116930526 | 116931178 |
|   | 12 | 116782517 | 116791016 | BC059230     | chr12 | 116788204 | 116788792 |
|   | 6  | 116679862 | 116688520 | NM_178768    | chr6  | 116687702 | 116688337 |
|   | 11 | 116653690 | 116662189 | NM_028865    | chr11 | 116658532 | 116659196 |
|   | 6  | 116636909 | 116645410 | NM_178045    | chr6  | 116640112 | 116640754 |
|   | 2  | 116564149 | 116572667 | NM_026104    | chr2  | 116564747 | 116565363 |
|   | 5  | 116547463 | 116555984 | NM_177759    | chr5  | 116553988 | 116554615 |
|   | 8  | 116515563 | 116531689 | NM_173015    | chr8  | 116516400 | 116517122 |
|   | 6  | 116510760 | 116524545 | NM_146759    | chr6  | 116513646 | 116514249 |
|   | 4  | 116487280 | 116501285 | NM_175244    | chr4  | 116494804 | 116495414 |
|   | 4  | 116489131 | 116498307 | NM_009478    | chr4  | 116494804 | 116495414 |
|   | 11 | 116467198 | 116475697 | DQ390337     | chr11 | 116469634 | 116470330 |
|   | 11 | 116467899 | 116476403 | NM_030206    | chr11 | 116469634 | 116470330 |
|   | 6  | 116453230 | 116461729 | NM_146912    | chr6  | 116459352 | 116460063 |
| X |    | 116401203 | 116409846 | BC126930     | chrX  | 116407409 | 116408046 |
| X |    | 116401203 | 116409846 | BC126930     | chrX  | 116403115 | 116403759 |
|   | 11 | 116394638 | 116403537 | NM_173755    | chr11 | 116396753 | 116397394 |
|   | 6  | 116375912 | 116384411 | BC049768     | chr6  | 116378030 | 116378643 |
|   | 6  | 116297657 | 116306241 | NM_027920    | chr6  | 116301171 | 116301791 |
|   | 7  | 116232098 | 116240597 | U52193       | chr7  | 116233906 | 116234500 |



|    |           |           |              |       |           |           |
|----|-----------|-----------|--------------|-------|-----------|-----------|
| 4  | 116177531 | 116187837 | NM_011034    | chr4  | 116182671 | 116183680 |
| 11 | 116140320 | 116158480 | NM_008240    | chr11 | 116153215 | 116153818 |
| 11 | 116051682 | 116060181 | NM_025276    | chr11 | 116054225 | 116054844 |
| 11 | 116051682 | 116060181 | NM_025276    | chr11 | 116053027 | 116053734 |
| 11 | 116026093 | 116035129 | NM_027165    | chr11 | 116031405 | 116032001 |
| 12 | 115953327 | 115961826 | BC110689     | chr12 | 115956085 | 115956710 |
| 6  | 115919138 | 115927637 | BC019530     | chr6  | 115925220 | 115926042 |
| 11 | 115923799 | 115932310 | NM_172570    | chr11 | 115924326 | 115924910 |
| 11 | 115837992 | 115846594 | NM_008211    | chr11 | 115839803 | 115840436 |
| 11 | 115840406 | 115848911 | NM_172569    | chr11 | 115839803 | 115840436 |
| 11 | 115817345 | 115825844 | BC080751     | chr11 | 115818867 | 115819452 |
| 6  | 115813147 | 115821730 | NM_031177    | chr6  | 115818546 | 115819408 |
| 6  | 115816443 | 115825340 | NM_010774    | chr6  | 115818546 | 115819408 |
| 5  | 115814514 | 115828761 | NM_172719    | chr5  | 115816298 | 115817064 |
| 11 | 115784815 | 115793314 | NM_001005608 | chr11 | 115790429 | 115791259 |
| 11 | 115746597 | 115755556 | NM_130454    | chr11 | 115748535 | 115749456 |
| 3  | 115704281 | 115713051 | NM_007901    | chr3  | 115703770 | 115704401 |
| 12 | 115604181 | 115612680 | BC103785     | chr12 | 115611576 | 115611951 |
| 5  | 115599661 | 115615960 | NM_029645    | chr5  | 115609170 | 115609776 |
| 4  | 115567341 | 115575896 | NM_153521    | chr4  | 115572937 | 115573550 |
| 4  | 115570447 | 115579002 | NM_025641    | chr4  | 115572937 | 115573550 |
| 4  | 115435343 | 115443858 | NM_130865    | chr4  | 115436203 | 115436796 |
| 4  | 115419250 | 115429570 | AF499446     | chr4  | 115420608 | 115421415 |
| 11 | 115349733 | 115358320 | NM_133354    | chr11 | 115352120 | 115353086 |
| 2  | 115267174 | 115275716 | NM_207264    | chr2  | 115271838 | 115272385 |
| 11 | 115230216 | 115238739 | NM_183285    | chr11 | 115234937 | 115235740 |
| 9  | 115156620 | 115165119 | NM_024222    | chr9  | 115159052 | 115159666 |
| 11 | 115133015 | 115141514 | AB087504     | chr11 | 115138687 | 115139286 |
| 11 | 115135492 | 115144008 | NM_176847    | chr11 | 115138687 | 115139286 |
| 3  | 115066969 | 115075468 | NM_153157    | chr3  | 115069340 | 115070184 |
| 12 | 115029341 | 115037840 | BC018315     | chr12 | 115035580 | 115036269 |
| 4  | 115010219 | 115018747 | NM_201640    | chr4  | 115012677 | 115013778 |
| 11 | 114997615 | 115006114 | NM_001033393 | chr11 | 115003376 | 115003993 |
| 5  | 114962873 | 114978459 | NM_029992    | chr5  | 114969746 | 114970357 |
| 11 | 114964268 | 114972774 | NM_021411    | chr11 | 114967149 | 114967812 |
| 5  | 114949368 | 114957934 | NM_019821    | chr5  | 114951818 | 114952477 |
| 12 | 114901434 | 114909951 | BC108375     | chr12 | 114906434 | 114907182 |
| 9  | 114780026 | 114788646 | NM_175380    | chr9  | 114784163 | 114784763 |
| 13 | 114736924 | 114745442 | NM_130796    | chr13 | 114741040 | 114741496 |
| 11 | 114661631 | 114670644 | NM_147217    | chr11 | 114667204 | 114667810 |
| 5  | 114635606 | 114653956 | NM_054093    | chr5  | 114641087 | 114642383 |
| 5  | 114638971 | 114647485 | NM_026145    | chr5  | 114641087 | 114642383 |
| 5  | 114635606 | 114653956 | NM_054093    | chr5  | 114640050 | 114640694 |
| 5  | 114638971 | 114647485 | NM_026145    | chr5  | 114640050 | 114640694 |
| X  | 114595174 | 114603673 | NM_153109    | chrX  | 114596969 | 114597561 |
| 10 | 114586624 | 114595132 | NM_173391    | chr10 | 114590476 | 114591101 |
| 4  | 114548358 | 114559958 | NM_011527    | chr4  | 114551832 | 114552447 |

|    |           |           |              |       |           |           |
|----|-----------|-----------|--------------|-------|-----------|-----------|
| 7  | 114494837 | 114503368 | NM_016980    | chr7  | 114496418 | 114497060 |
| 12 | 114440060 | 114448559 | BC028249     | chr12 | 114446246 | 114446838 |
| 12 | 114440060 | 114448559 | BC028249     | chr12 | 114444655 | 114445281 |
| 7  | 114424938 | 114433444 | NM_001033954 | chr7  | 114424983 | 114425697 |
| 8  | 114417515 | 114426212 | NM_133206    | chr8  | 114423357 | 114423968 |
| 5  | 114252257 | 114260758 | NM_198109    | chr5  | 114254252 | 114254864 |
| 9  | 114211114 | 114219652 | BC020150     | chr9  | 114211467 | 114212073 |
| 12 | 114162429 | 114170928 | BC085241     | chr12 | 114162460 | 114163059 |
| 5  | 114022099 | 114036320 | NM_025526    | chr5  | 114032415 | 114033167 |
| 5  | 114030149 | 114038648 | NM_016926    | chr5  | 114032415 | 114033167 |
| 5  | 114022099 | 114036320 | NM_025526    | chr5  | 114025159 | 114025783 |
| 12 | 113931319 | 113939852 | NM_001009545 | chr12 | 113937381 | 113938157 |
| 8  | 113911895 | 113924426 | NM_172284    | chr8  | 113919554 | 113920166 |
| 8  | 113914577 | 113923141 | NM_146217    | chr8  | 113919554 | 113920166 |
| 9  | 113773867 | 113782849 | NM_013699    | chr9  | 113780226 | 113780846 |
| 2  | 113741742 | 113750252 | NM_009608    | chr2  | 113743270 | 113743886 |
| 13 | 113712739 | 113721238 | AY509150     | chr13 | 113715328 | 113716067 |
| 4  | 113655316 | 113663815 | NM_177669    | chr4  | 113662563 | 113663172 |
| 12 | 113627733 | 113638285 | NM_153776    | chr12 | 113636947 | 113637779 |
| 7  | 113551321 | 113559820 | NM_145584    | chr7  | 113558209 | 113558809 |
| 2  | 113548563 | 113565485 | NM_011824    | chr2  | 113555484 | 113556121 |
| 8  | 113517046 | 113525545 | BC032215     | chr8  | 113524202 | 113524798 |
| 11 | 113494500 | 113507095 | NM_177777    | chr11 | 113495211 | 113495738 |
| 11 | 113459418 | 113468136 | NM_013581    | chr11 | 113465490 | 113466144 |
| 6  | 113443203 | 113451939 | NM_133930    | chr6  | 113444416 | 113445024 |
| 6  | 113418261 | 113439850 | NM_145826    | chr6  | 113437212 | 113437930 |
| 13 | 113403329 | 113412197 | NM_029898    | chr13 | 113411042 | 113411692 |
| 13 | 113403329 | 113412197 | NM_029898    | chr13 | 113407680 | 113408291 |
| 11 | 113379353 | 113387858 | NM_027216    | chr11 | 113386792 | 113387557 |
| 12 | 113250783 | 113259624 | NM_145450    | chr12 | 113252532 | 113253127 |
| 12 | 113164042 | 113172647 | NM_001024602 | chr12 | 113170385 | 113170988 |
| 12 | 113164042 | 113172647 | NM_001024602 | chr12 | 113167985 | 113168599 |
| 8  | 113150106 | 113158605 | NM_172916    | chr8  | 113155617 | 113156451 |
| 6  | 113006099 | 113015690 | NM_008188    | chr6  | 113012074 | 113012866 |
| 12 | 112931275 | 112939922 | NM_177039    | chr12 | 112933703 | 112934276 |
| 8  | 112751732 | 112760239 | BC117961     | chr8  | 112751788 | 112752381 |
| 8  | 112661839 | 112670338 | NM_009677    | chr8  | 112666852 | 112667608 |
| 6  | 112659911 | 112668447 | NM_021385    | chr6  | 112664335 | 112665169 |
| 5  | 112630017 | 112638516 | NM_028386    | chr5  | 112633233 | 112633841 |
| 13 | 112606091 | 112616736 | NM_028487    | chr13 | 112611531 | 112612156 |
| 5  | 112593837 | 112602336 | NM_001039228 | chr5  | 112598706 | 112599334 |
| 11 | 112592314 | 112600871 | NM_011448    | chr11 | 112597092 | 112598028 |
| 8  | 112579867 | 112588393 | NM_028018    | chr8  | 112582945 | 112583588 |
| 8  | 112579867 | 112588393 | NM_028018    | chr8  | 112581822 | 112582491 |
| 7  | 112544624 | 112553123 | BC060138     | chr7  | 112548832 | 112549423 |
| 11 | 112524932 | 112533446 | BC006965     | chr11 | 112528189 | 112528625 |
| 8  | 112449021 | 112457635 | NM_175646    | chr8  | 112452302 | 112452889 |

|    |           |           |              |       |           |           |
|----|-----------|-----------|--------------|-------|-----------|-----------|
| 8  | 112452231 | 112460730 | NM_178380    | chr8  | 112452302 | 112452889 |
| 8  | 112377156 | 112385655 | NM_019938    | chr8  | 112383658 | 112384259 |
| 14 | 112190445 | 112198968 | BC092045     | chr14 | 112197231 | 112197959 |
| 2  | 112174050 | 112182593 | NM_024254    | chr2  | 112179410 | 112180043 |
| 12 | 112119951 | 112128458 | NM_177374    | chr12 | 112125499 | 112126282 |
| 9  | 112028305 | 112038806 | NM_033264    | chr9  | 112035019 | 112035861 |
| 2  | 111950792 | 111959291 | NM_001011802 | chr2  | 111955836 | 111956506 |
| 2  | 111929155 | 111937654 | NM_146742    | chr2  | 111935103 | 111935847 |
| 2  | 111929155 | 111937654 | NM_146742    | chr2  | 111931008 | 111931629 |
| 2  | 111891039 | 111899538 | NM_146450    | chr2  | 111897251 | 111897888 |
| 12 | 111886752 | 111895269 | NM_009396    | chr12 | 111893778 | 111894580 |
| 12 | 111859253 | 111867896 | NM_028807    | chr12 | 111860479 | 111861373 |
| 10 | 111561731 | 111572285 | NM_178278    | chr10 | 111565132 | 111565733 |
| 13 | 111509940 | 111518439 | NM_152804    | chr13 | 111517888 | 111518411 |
| 10 | 111481464 | 111489963 | NM_026223    | chr10 | 111482096 | 111482744 |
| 4  | 111394202 | 111406728 | NM_145551    | chr4  | 111398295 | 111399270 |
| 4  | 111211938 | 111220441 | NM_026470    | chr4  | 111216209 | 111216614 |
| 9  | 111213636 | 111222135 | BC086653     | chr9  | 111214994 | 111215612 |
| 2  | 111173806 | 111182305 | NM_146381    | chr2  | 111175401 | 111176007 |
| 2  | 111163430 | 111171929 | NM_207236    | chr2  | 111169172 | 111170771 |
| 2  | 111134416 | 111142915 | NM_146907    | chr2  | 111140152 | 111140797 |
| 2  | 111134416 | 111142915 | NM_146907    | chr2  | 111135973 | 111136943 |
| 2  | 111123260 | 111131759 | NM_001005568 | chr2  | 111131112 | 111131711 |
| 2  | 111110277 | 111118776 | NM_146908    | chr2  | 111115167 | 111116192 |
| 9  | 111110657 | 111119244 | NM_175266    | chr9  | 111113159 | 111113847 |
| 2  | 111068728 | 111077231 | NM_146396    | chr2  | 111073075 | 111073676 |
| 2  | 111027891 | 111038630 | NM_026248    | chr2  | 111029456 | 111030136 |
| 2  | 111027891 | 111038630 | NM_026248    | chr2  | 111028498 | 111029199 |
| 5  | 111017700 | 111026917 | NM_001025561 | chr5  | 111025403 | 111026210 |
| 5  | 111008330 | 111016878 | NM_029337    | chr5  | 111015234 | 111015942 |
| 9  | 110956951 | 110966990 | NM_027742    | chr9  | 110962751 | 110963367 |
| 12 | 110889114 | 110898278 | NM_001037934 | chr12 | 110894519 | 110894996 |
| 13 | 110801038 | 110809537 | AY388962     | chr13 | 110802850 | 110803434 |
| 9  | 110602494 | 110610996 | NM_010859    | chr9  | 110605771 | 110606389 |
| 14 | 110550952 | 110559832 | NM_198865    | chr14 | 110556066 | 110556703 |
| 8  | 110475060 | 110483611 | NM_010817    | chr8  | 110476757 | 110477699 |
| 9  | 110466680 | 110475209 | NM_026012    | chr9  | 110468985 | 110469611 |
| 10 | 110318286 | 110326811 | NM_007792    | chr10 | 110320094 | 110320869 |
| 8  | 110176688 | 110185493 | NM_133957    | chr8  | 110183976 | 110184819 |
| 9  | 110172494 | 110181022 | NM_001001144 | chr9  | 110180181 | 110180775 |
| 12 | 110040711 | 110049210 | NM_184109    | chr12 | 110043848 | 110044456 |
| 12 | 110040711 | 110049210 | NM_184109    | chr12 | 110040874 | 110041830 |
| 8  | 109940006 | 109948518 | NM_025391    | chr8  | 109941519 | 109942402 |
| 2  | 109812678 | 109825277 | NM_026613    | chr2  | 109820562 | 109821147 |
| 1  | 109350550 | 109359108 | NM_198028    | chr1  | 109355749 | 109356487 |
| 9  | 109350761 | 109359260 | NM_177703    | chr9  | 109353583 | 109354201 |
| 12 | 109338505 | 109347920 | NM_011710    | chr12 | 109345924 | 109346518 |

|    |           |           |              |       |           |           |
|----|-----------|-----------|--------------|-------|-----------|-----------|
| 9  | 109336701 | 109345200 | NM_177070    | chr9  | 109343917 | 109344531 |
| 11 | 109286800 | 109295686 | NM_001029842 | chr11 | 109289044 | 109289728 |
| 12 | 109281057 | 109289683 | NM_181328    | chr12 | 109285858 | 109286380 |
| 12 | 109281057 | 109289683 | NM_181328    | chr12 | 109283962 | 109284563 |
| 11 | 109236036 | 109244815 | NM_025275    | chr11 | 109241861 | 109242483 |
| 1  | 109183861 | 109199422 | NM_025867    | chr1  | 109191760 | 109192381 |
| 1  | 109183861 | 109199422 | NM_025867    | chr1  | 109185886 | 109186745 |
| 8  | 109167608 | 109176107 | BC046980     | chr8  | 109172108 | 109172992 |
| 8  | 109023604 | 109032103 | NM_176838    | chr8  | 109024165 | 109024780 |
| 4  | 108971938 | 108980915 | NM_013876    | chr4  | 108973306 | 108974394 |
| 9  | 108933906 | 108955497 | NM_172775    | chr9  | 108946411 | 108947087 |
| 5  | 108928570 | 108937790 | NM_054071    | chr5  | 108933532 | 108934019 |
| 9  | 108906317 | 108914859 | NM_026381    | chr9  | 108908900 | 108909489 |
| 12 | 108776165 | 108784687 | NM_010010    | chr12 | 108777844 | 108778267 |
| 11 | 108730456 | 108741830 | NM_015732    | chr11 | 108738461 | 108739343 |
| 11 | 108730456 | 108741830 | NM_015732    | chr11 | 108737345 | 108737932 |
| 9  | 108705260 | 108714460 | NM_134420    | chr9  | 108709739 | 108710426 |
| 6  | 108620406 | 108628973 | NM_011498    | chr6  | 108627561 | 108628202 |
| 8  | 108584283 | 108599931 | NM_001047436 | chr8  | 108589706 | 108590320 |
| 8  | 108586451 | 108603319 | NM_001012638 | chr8  | 108589706 | 108590320 |
| 8  | 108500009 | 108512504 | BC030451     | chr8  | 108511794 | 108512477 |
| 9  | 108422946 | 108442938 | NM_031392    | chr9  | 108434148 | 108434828 |
| X  | 108422302 | 108430851 | NM_026565    | chrX  | 108428318 | 108428930 |
| 7  | 108397486 | 108405985 | NM_001011871 | chr7  | 108403850 | 108404470 |
| 9  | 108360162 | 108377758 | NM_133794    | chr9  | 108374522 | 108375167 |
| 8  | 108357997 | 108366518 | NM_026481    | chr8  | 108365413 | 108366263 |
| 4  | 108339717 | 108348288 | NM_029571    | chr4  | 108346417 | 108347003 |
| 7  | 108329704 | 108338203 | NM_001011527 | chr7  | 108333567 | 108334555 |
| 4  | 108329017 | 108337516 | NM_027453    | chr4  | 108332761 | 108333379 |
| 4  | 108329017 | 108337516 | NM_027453    | chr4  | 108331798 | 108332672 |
| 4  | 108329017 | 108337516 | NM_027453    | chr4  | 108330811 | 108331551 |
| 5  | 108224825 | 108233335 | NM_026062    | chr5  | 108227048 | 108227665 |
| 3  | 108208032 | 108223623 | NM_008141    | chr3  | 108223092 | 108223588 |
| 8  | 108180792 | 108197237 | NM_172760    | chr8  | 108193732 | 108194330 |
| 3  | 108170243 | 108178844 | NM_026764    | chr3  | 108170834 | 108171441 |
| 9  | 108142541 | 108157514 | NM_025449    | chr9  | 108154693 | 108155336 |
| 8  | 108141448 | 108150280 | NM_178879    | chr8  | 108143388 | 108144200 |
| 4  | 108111888 | 108121941 | NM_177045    | chr4  | 108118720 | 108119310 |
| 5  | 108112910 | 108121409 | NM_007964    | chr5  | 108113786 | 108114587 |
| 6  | 108103777 | 108112283 | NM_018730    | chr6  | 108109836 | 108110538 |
| 8  | 108053803 | 108062534 | NM_022309    | chr8  | 108059089 | 108059696 |
| 3  | 108017895 | 108026455 | NM_010360    | chr3  | 108021602 | 108022187 |
| 7  | 107961420 | 107969919 | NM_146496    | chr7  | 107966089 | 107966881 |
| 9  | 107901391 | 107913811 | NM_177275    | chr9  | 107907961 | 107908561 |
| 4  | 107902146 | 107910646 | NM_024198    | chr4  | 107903773 | 107904471 |
| 9  | 107847864 | 107863248 | NM_013785    | chr9  | 107860587 | 107861244 |
| 8  | 107809399 | 107817919 | NM_172759    | chr8  | 107812919 | 107813510 |

|   |    |           |           |              |       |           |           |
|---|----|-----------|-----------|--------------|-------|-----------|-----------|
|   | 9  | 107758990 | 107767489 | NM_009074    | chr9  | 107766648 | 107767437 |
|   | 5  | 107665851 | 107680798 | NM_027599    | chr5  | 107677901 | 107678702 |
| X |    | 107577490 | 107585989 | BC054113     | chrX  | 107579688 | 107580445 |
|   | 10 | 107560303 | 107568802 | NM_027892    | chr10 | 107567132 | 107567743 |
|   | 7  | 107545993 | 107555173 | NM_177216    | chr7  | 107554077 | 107554665 |
|   | 9  | 107535194 | 107543716 | NM_008140    | chr9  | 107541628 | 107542220 |
|   | 5  | 107527184 | 107535822 | NM_011578    | chr5  | 107530124 | 107530652 |
|   | 9  | 107452642 | 107473342 | NM_001042779 | chr9  | 107459437 | 107460443 |
|   | 9  | 107386046 | 107448373 | NM_008317    | chr9  | 107406015 | 107406877 |
|   | 9  | 107397467 | 107406219 | NM_019720    | chr9  | 107406015 | 107406877 |
|   | 11 | 107358046 | 107367932 | NM_198298    | chr11 | 107363070 | 107364695 |
|   | 8  | 107239469 | 107247968 | BC022771     | chr8  | 107243500 | 107244106 |
|   | 1  | 107180202 | 107190217 | NM_178779    | chr1  | 107188985 | 107189691 |
|   | 3  | 107158479 | 107170059 | NM_173787    | chr3  | 107167733 | 107168800 |
|   | 3  | 107158479 | 107170059 | NM_173787    | chr3  | 107163151 | 107163762 |
|   | 9  | 107087461 | 107095960 | NM_153413    | chr9  | 107090205 | 107090813 |
|   | 5  | 106933778 | 106943132 | NM_026856    | chr5  | 106933824 | 106934442 |
|   | 5  | 106874443 | 106882942 | BC030844     | chr5  | 106879553 | 106880157 |
|   | 7  | 106823785 | 106832284 | NM_147034    | chr7  | 106826335 | 106826946 |
|   | 9  | 106737469 | 106756047 | NM_029103    | chr9  | 106747030 | 106747833 |
|   | 7  | 106739462 | 106747961 | NM_146601    | chr7  | 106746510 | 106747163 |
|   | 5  | 106695687 | 106704752 | NM_001005477 | chr5  | 106702414 | 106703032 |
|   | 7  | 106652631 | 106661130 | NM_001011749 | chr7  | 106656972 | 106657541 |
|   | 1  | 106590076 | 106598886 | NM_011800    | chr1  | 106591160 | 106591781 |
|   | 3  | 106531739 | 106540238 | NM_178412    | chr3  | 106535495 | 106536286 |
|   | 3  | 106345021 | 106353520 | NM_145126    | chr3  | 106352697 | 106353281 |
|   | 9  | 106329410 | 106337926 | NM_145620    | chr9  | 106334537 | 106335293 |
|   | 9  | 106331762 | 106340752 | NM_145619    | chr9  | 106334537 | 106335293 |
|   | 7  | 106232223 | 106240722 | NM_001001318 | chr7  | 106234449 | 106235068 |
|   | 9  | 106220733 | 106229589 | NM_153459    | chr9  | 106225238 | 106225846 |
|   | 4  | 106114381 | 106122880 | NM_177667    | chr4  | 106122124 | 106122763 |
|   | 5  | 106110870 | 106119403 | NM_018759    | chr5  | 106116748 | 106117473 |
|   | 11 | 106066244 | 106081775 | NM_008950    | chr11 | 106078340 | 106078927 |
|   | 9  | 106013398 | 106022239 | NM_174846    | chr9  | 106017616 | 106018474 |
|   | 3  | 105992914 | 106001462 | NM_027025    | chr3  | 105998744 | 105999346 |
|   | 11 | 105973677 | 105982232 | NM_172397    | chr11 | 105979422 | 105980029 |
|   | 4  | 105959762 | 105968261 | NM_153565    | chr4  | 105961499 | 105962255 |
|   | 13 | 105934630 | 105943335 | NM_026072    | chr13 | 105940520 | 105941395 |
|   | 3  | 105926893 | 105935392 | NM_145541    | chr3  | 105928998 | 105929829 |
|   | 2  | 105702840 | 105711339 | NM_023876    | chr2  | 105709687 | 105710278 |
|   | 7  | 105682318 | 105690908 | NM_025301    | chr7  | 105683651 | 105684349 |
|   | 5  | 105650077 | 105658576 | NM_001033550 | chr5  | 105657785 | 105658567 |
|   | 7  | 105607813 | 105636302 | NM_009906    | chr7  | 105625175 | 105626045 |
|   | 7  | 105452536 | 105461356 | NM_009685    | chr7  | 105455280 | 105455877 |
|   | 12 | 105408360 | 105416859 | NM_172500    | chr12 | 105410673 | 105411314 |
|   | 7  | 105353519 | 105362018 | NM_028444    | chr7  | 105355655 | 105356252 |
|   | 7  | 105353519 | 105362018 | NM_028444    | chr7  | 105354864 | 105355608 |

|   |    |           |           |              |       |           |           |
|---|----|-----------|-----------|--------------|-------|-----------|-----------|
|   | 13 | 105293209 | 105301979 | NM_030731    | chr13 | 105298253 | 105299075 |
|   | 13 | 105296290 | 105304821 | NM_025879    | chr13 | 105298253 | 105299075 |
|   | 7  | 105271333 | 105279832 | NM_199009    | chr7  | 105278999 | 105279678 |
|   | 7  | 105272389 | 105280942 | NM_001033317 | chr7  | 105278999 | 105279678 |
|   | 7  | 105271333 | 105279832 | NM_199009    | chr7  | 105273146 | 105273796 |
|   | 7  | 105272389 | 105280942 | NM_001033317 | chr7  | 105273146 | 105273796 |
|   | 2  | 105079439 | 105087938 | BC014740     | chr2  | 105081495 | 105082014 |
|   | 7  | 105075663 | 105084162 | NM_147069    | chr7  | 105077666 | 105078514 |
|   | 7  | 105015631 | 105024130 | NM_147045    | chr7  | 105023139 | 105023701 |
|   | 14 | 104985804 | 104994305 | NM_198601    | chr14 | 104992658 | 104993263 |
|   | 10 | 104976046 | 104984589 | NM_177368    | chr10 | 104979000 | 104979675 |
|   | 7  | 104953539 | 104962038 | NM_147044    | chr7  | 104955424 | 104956412 |
|   | 3  | 104943781 | 104952298 | NM_008619    | chr3  | 104948997 | 104949555 |
|   | 11 | 104936577 | 104945076 | NM_172567    | chr11 | 104942330 | 104942974 |
|   | 7  | 104924069 | 104932568 | NM_146358    | chr7  | 104925607 | 104926202 |
|   | 3  | 104903112 | 104922442 | NM_027982    | chr3  | 104918215 | 104918983 |
|   | 3  | 104901625 | 104911603 | NM_183224    | chr3  | 104901981 | 104902585 |
|   | 12 | 104609581 | 104620415 | NM_001033335 | chr12 | 104618456 | 104619561 |
|   | 5  | 104559631 | 104569863 | NM_053172    | chr5  | 104562803 | 104563479 |
|   | 2  | 104385362 | 104393956 | NM_145529    | chr2  | 104391766 | 104392359 |
|   | 12 | 104355443 | 104363947 | NM_009247    | chr12 | 104358385 | 104358989 |
|   | 7  | 104224660 | 104238467 | NM_175648    | chr7  | 104227053 | 104227564 |
|   | 7  | 104112278 | 104124318 | NM_030684    | chr7  | 104118633 | 104119220 |
|   | 3  | 104091171 | 104100006 | NM_013629    | chr3  | 104098695 | 104099316 |
|   | 7  | 104051728 | 104060227 | NM_146751    | chr7  | 104053250 | 104053838 |
| X |    | 104016493 | 104025000 | NM_025921    | chrX  | 104021113 | 104021808 |
|   | 3  | 103983353 | 103991926 | NM_008979    | chr3  | 103983524 | 103983853 |
|   | 9  | 103955641 | 103967364 | AY072796     | chr9  | 103956993 | 103957581 |
|   | 9  | 103916048 | 103924583 | NM_175324    | chr9  | 103919531 | 103920224 |
|   | 9  | 103918840 | 103927466 | NM_025692    | chr9  | 103919531 | 103920224 |
|   | 7  | 103884022 | 103892521 | NM_147084    | chr7  | 103885607 | 103886443 |
|   | 2  | 103861357 | 103874348 | NM_181858    | chr2  | 103867201 | 103867905 |
|   | 3  | 103859115 | 103873062 | NM_133859    | chr3  | 103865014 | 103865603 |
|   | 7  | 103846997 | 103855496 | NM_147118    | chr7  | 103853450 | 103854069 |
|   | 5  | 103784079 | 103792578 | D28529       | chr5  | 103788260 | 103788894 |
|   | 7  | 103757598 | 103774292 | NM_013618    | chr7  | 103759887 | 103760693 |
|   | 7  | 103724490 | 103733028 | NM_008221    | chr7  | 103728827 | 103729419 |
|   | 7  | 103724490 | 103733028 | NM_008221    | chr7  | 103727929 | 103728520 |
|   | 3  | 103698342 | 103707711 | NM_018800    | chr3  | 103702527 | 103703167 |
|   | 3  | 103698342 | 103707711 | NM_018800    | chr3  | 103700081 | 103700926 |
|   | 7  | 103612644 | 103621143 | NM_146821    | chr7  | 103613282 | 103613988 |
| X |    | 103603547 | 103612079 | NM_008409    | chrX  | 103606110 | 103606932 |
|   | 7  | 103511460 | 103519959 | NM_147083    | chr7  | 103513400 | 103514019 |
|   | 7  | 103483673 | 103492172 | NM_146812    | chr7  | 103485408 | 103485994 |
|   | 6  | 103470649 | 103479148 | NM_007697    | chr6  | 103478711 | 103479228 |
|   | 6  | 103470649 | 103479148 | NM_007697    | chr6  | 103475149 | 103475767 |
|   | 11 | 103459599 | 103468098 | NM_001033212 | chr11 | 103465252 | 103465868 |

|   |    |           |           |              |       |           |           |
|---|----|-----------|-----------|--------------|-------|-----------|-----------|
|   | 7  | 103451845 | 103460344 | NM_146841    | chr7  | 103456774 | 103457998 |
|   | 7  | 103418189 | 103426688 | NM_147100    | chr7  | 103420069 | 103420629 |
|   | 7  | 103378266 | 103386765 | NM_147081    | chr7  | 103385371 | 103386319 |
|   | 2  | 103361149 | 103369648 | NM_178890    | chr2  | 103367434 | 103368027 |
|   | 14 | 103351179 | 103359678 | NM_011143    | chr14 | 103357159 | 103357747 |
|   | 2  | 103283434 | 103291962 | NM_009804    | chr2  | 103288425 | 103289073 |
|   | 12 | 103138808 | 103147321 | NM_177140    | chr12 | 103143077 | 103143783 |
|   | 3  | 103090695 | 103099194 | NM_198658    | chr3  | 103095556 | 103096239 |
|   | 7  | 103079683 | 103096040 | NM_146380    | chr7  | 103093680 | 103094433 |
| X |    | 103040863 | 103049362 | NM_199468    | chrX  | 103041887 | 103042558 |
|   | 5  | 103003098 | 103011597 | BC023344     | chr5  | 103003582 | 103004241 |
|   | 11 | 102915193 | 102923716 | NM_152813    | chr11 | 102919656 | 102920329 |
|   | 12 | 102864185 | 102875544 | NM_013747    | chr12 | 102873990 | 102874546 |
|   | 15 | 102831596 | 102844541 | NM_175730    | chr15 | 102842950 | 102843726 |
|   | 15 | 102831596 | 102844541 | NM_175730    | chr15 | 102840638 | 102841324 |
|   | 7  | 102826942 | 102835441 | NM_147114    | chr7  | 102827964 | 102828583 |
|   | 15 | 102812573 | 102821072 | NM_010466    | chr15 | 102815556 | 102816230 |
|   | 7  | 102759473 | 102767972 | NM_147088    | chr7  | 102763885 | 102764532 |
|   | 11 | 102760052 | 102768551 | NM_011795    | chr11 | 102761937 | 102762532 |
|   | 14 | 102726859 | 102736081 | NM_007904    | chr14 | 102731977 | 102732655 |
| X |    | 102685448 | 102693993 | NM_001007580 | chrX  | 102689410 | 102690027 |
|   | 4  | 102606397 | 102627703 | NM_027696    | chr4  | 102627243 | 102627698 |
|   | 4  | 102606397 | 102627703 | NM_027696    | chr4  | 102612138 | 102612799 |
|   | 4  | 102609657 | 102618156 | NM_146254    | chr4  | 102612138 | 102612799 |
|   | 11 | 102571669 | 102580195 | NM_009613    | chr11 | 102579470 | 102580075 |
|   | 9  | 102572230 | 102583192 | AF175968     | chr9  | 102572645 | 102573247 |
| X |    | 102383843 | 102392342 | NM_008828    | chrX  | 102390103 | 102390707 |
|   | 15 | 102331105 | 102363059 | NM_009582    | chr15 | 102336488 | 102337111 |
|   | 7  | 102309638 | 102318264 | NM_009103    | chr7  | 102315088 | 102315692 |
|   | 5  | 102307724 | 102316223 | NM_172882    | chr5  | 102307562 | 102308192 |
|   | 11 | 102283324 | 102299342 | NM_010575    | chr11 | 102296185 | 102296788 |
| X |    | 102224036 | 102232540 | NM_009726    | chrX  | 102229540 | 102230246 |
|   | 11 | 102221007 | 102229598 | NM_026542    | chr11 | 102224213 | 102224866 |
|   | 15 | 102176195 | 102184767 | NM_153416    | chr15 | 102178341 | 102179332 |
|   | 11 | 102130065 | 102141186 | NM_011551    | chr11 | 102134042 | 102134655 |
|   | 15 | 102101488 | 102110629 | NM_134100    | chr15 | 102106806 | 102107995 |
|   | 15 | 102071811 | 102091517 | NM_011244    | chr15 | 102085095 | 102085686 |
|   | 15 | 102053136 | 102065969 | NM_013566    | chr15 | 102062987 | 102063646 |
|   | 5  | 101999432 | 102008022 | NM_173370    | chr5  | 102006423 | 102007345 |
|   | 15 | 101961752 | 101970251 | NM_001033277 | chr15 | 101969405 | 101970082 |
|   | 15 | 101966396 | 101981138 | NM_146064    | chr15 | 101969405 | 101970082 |
|   | 7  | 101933332 | 101959436 | NM_011644    | chr7  | 101953625 | 101954215 |
|   | 7  | 101933332 | 101959436 | NM_011644    | chr7  | 101945016 | 101945919 |
|   | 7  | 101936454 | 101945288 | NM_029211    | chr7  | 101945016 | 101945919 |
|   | 1  | 101921912 | 101930411 | NM_172851    | chr1  | 101927353 | 101927942 |
|   | 15 | 101765859 | 101774358 | NM_146063    | chr15 | 101770111 | 101770841 |
|   | 13 | 101745631 | 101756946 | NM_001015889 | chr13 | 101755262 | 101755867 |

|   |    |           |           |              |       |           |           |
|---|----|-----------|-----------|--------------|-------|-----------|-----------|
|   | 13 | 101748743 | 101757316 | NM_011233    | chr13 | 101755262 | 101755867 |
|   | 13 | 101650256 | 101658975 | NM_008756    | chr13 | 101652548 | 101653377 |
|   | 2  | 101595957 | 101604503 | NM_175181    | chr2  | 101598487 | 101599183 |
|   | 7  | 101452483 | 101460982 | NM_019915    | chr7  | 101452925 | 101453563 |
|   | 11 | 101362709 | 101373955 | NM_009764    | chr11 | 101368656 | 101369387 |
|   | 15 | 101234436 | 101242982 | NM_033073    | chr15 | 101241353 | 101242216 |
|   | 4  | 101219937 | 101228436 | NM_146146    | chr4  | 101221517 | 101222110 |
|   | 15 | 101195660 | 101204198 | BC120601     | chr15 | 101196815 | 101197668 |
|   | 11 | 101056424 | 101079231 | NM_175638    | chr11 | 101062088 | 101063085 |
| X |    | 101057376 | 101065875 | NM_053206    | chrX  | 101059170 | 101059966 |
|   | 11 | 100986207 | 100994706 | NM_016782    | chr11 | 100992832 | 100993666 |
|   | 7  | 100976900 | 100985399 | NM_199012    | chr7  | 100983430 | 100984011 |
|   | 15 | 100950556 | 100959459 | NM_009612    | chr15 | 100957010 | 100957732 |
|   | 15 | 100950556 | 100959459 | NM_009612    | chr15 | 100951264 | 100952114 |
|   | 11 | 100908978 | 100917493 | NM_008949    | chr11 | 100911957 | 100912547 |
|   | 7  | 100883564 | 100892078 | NM_008773    | chr7  | 100884721 | 100885299 |
| X |    | 100871023 | 100879522 | NM_175358    | chrX  | 100872864 | 100873570 |
|   | 3  | 100811439 | 100820511 | NM_010763    | chr3  | 100814510 | 100815529 |
|   | 11 | 100664132 | 100672816 | BC024319     | chr11 | 100671992 | 100672601 |
|   | 11 | 100669493 | 100679136 | NM_011488    | chr11 | 100671992 | 100672601 |
|   | 11 | 100664132 | 100672816 | BC024319     | chr11 | 100666292 | 100667878 |
|   | 11 | 100573196 | 100593047 | NM_031871    | chr11 | 100574646 | 100575241 |
|   | 6  | 100564771 | 100573274 | BC094903     | chr6  | 100569978 | 100571038 |
|   | 15 | 100554911 | 100564885 | NM_172451    | chr15 | 100556263 | 100556870 |
|   | 11 | 100517772 | 100534544 | NM_001038010 | chr11 | 100524947 | 100525547 |
|   | 5  | 100397391 | 100406110 | NM_182841    | chr5  | 100398695 | 100399835 |
|   | 7  | 100361440 | 100373340 | NM_011671    | chr7  | 100373259 | 100373910 |
|   | 5  | 100274303 | 100282878 | NM_026421    | chr5  | 100279047 | 100279676 |
|   | 5  | 100276672 | 100285464 | NM_016690    | chr5  | 100279047 | 100279676 |
|   | 1  | 100245530 | 100254059 | BC112423     | chr1  | 100252708 | 100253314 |
|   | 11 | 100225647 | 100234336 | NM_010221    | chr11 | 100230941 | 100231643 |
|   | 11 | 100228410 | 100236909 | NM_176830    | chr11 | 100230941 | 100231643 |
|   | 11 | 100225647 | 100234336 | NM_010221    | chr11 | 100227047 | 100227647 |
|   | 11 | 100211330 | 100219833 | NM_010593    | chr11 | 100217759 | 100218481 |
| X |    | 100181468 | 100190003 | NM_011276    | chrX  | 100183129 | 100183727 |
|   | 15 | 100175183 | 100183733 | NM_199477    | chr15 | 100181270 | 100181879 |
|   | 11 | 100074580 | 100083079 | NM_010663    | chr11 | 100081314 | 100082017 |
| X |    | 100022044 | 100030707 | NM_009197    | chrX  | 100023556 | 100024219 |
|   | 15 | 99976430  | 99984929  | NM_172819    | chr15 | 99982458  | 99983155  |
|   | 7  | 99804463  | 99812962  | NM_183313    | chr7  | 99805308  | 99805920  |
| X |    | 99726299  | 99734798  | NM_001045541 | chrX  | 99728565  | 99729217  |
|   | 11 | 99665196  | 99673695  | NM_001013823 | chr11 | 99669392  | 99670035  |
|   | 6  | 99629730  | 99638234  | NM_025829    | chr6  | 99633635  | 99634310  |
|   | 1  | 99589456  | 99606434  | NM_173760    | chr1  | 99602654  | 99603273  |
|   | 1  | 99594601  | 99608351  | NM_026250    | chr1  | 99602654  | 99603273  |
| X |    | 99518117  | 99526628  | NM_007674    | chrX  | 99525043  | 99525631  |
| X |    | 99518117  | 99526628  | NM_007674    | chrX  | 99524084  | 99524669  |



|   |    |          |                       |       |          |          |
|---|----|----------|-----------------------|-------|----------|----------|
|   | 15 | 99492752 | 99501251 NM_009597    | chr15 | 99492766 | 99493698 |
|   | 5  | 99490621 | 99499162 NM_145839    | chr5  | 99491744 | 99492486 |
|   | 11 | 99394607 | 99457174 NM_001039502 | chr11 | 99425643 | 99426252 |
|   | 15 | 99423434 | 99431933 NM_175087    | chr15 | 99423403 | 99424110 |
|   | 11 | 99394607 | 99457174 NM_001039502 | chr11 | 99417227 | 99417824 |
| X |    | 99386585 | 99395359 NM_008671    | chrX  | 99388245 | 99389099 |
|   | 11 | 99334849 | 99343348 NM_213730    | chr11 | 99341321 | 99341697 |
|   | 5  | 99274793 | 99283653 NM_008926    | chr5  | 99280419 | 99281046 |
|   | 7  | 99249632 | 99258131 NM_201352    | chr7  | 99257737 | 99258693 |
|   | 7  | 99249632 | 99258131 NM_201352    | chr7  | 99254405 | 99255209 |
|   | 9  | 99243557 | 99252056 NM_008624    | chr9  | 99244373 | 99245246 |
|   | 7  | 99224680 | 99233197 NM_009825    | chr7  | 99229523 | 99230341 |
|   | 7  | 99224680 | 99233197 NM_009825    | chr7  | 99227195 | 99227861 |
|   | 7  | 99224680 | 99233197 NM_009825    | chr7  | 99225022 | 99226042 |
|   | 15 | 99196001 | 99204500 NM_011711    | chr15 | 99197082 | 99197857 |
| X |    | 98999682 | 99009451 BC116811     | chrX  | 99007346 | 99008046 |
|   | 12 | 98976491 | 98984990 NM_029911    | chr12 | 98979246 | 98980253 |
|   | 6  | 98966370 | 98974869 AF339105     | chr6  | 98972507 | 98973343 |
|   | 15 | 98948612 | 98957378 NM_139140    | chr15 | 98954034 | 98954675 |
|   | 9  | 98946940 | 98955439 NM_029094    | chr9  | 98948712 | 98949401 |
|   | 15 | 98921518 | 98930017 NM_176835    | chr15 | 98926936 | 98927555 |
|   | 15 | 98921518 | 98930017 NM_176835    | chr15 | 98922872 | 98923619 |
| X |    | 98844362 | 98852917 NM_173021    | chrX  | 98846830 | 98847608 |
|   | 11 | 98796607 | 98805106 NM_178596    | chr11 | 98798985 | 98799936 |
|   | 3  | 98772089 | 98780595 NM_008295    | chr3  | 98777781 | 98778375 |
|   | 11 | 98747786 | 98756287 NM_009024    | chr11 | 98753451 | 98754070 |
|   | 15 | 98743570 | 98752132 NM_029098    | chr15 | 98745742 | 98746342 |
|   | 11 | 98717979 | 98726740 NM_011799    | chr11 | 98726135 | 98726724 |
|   | 1  | 98700037 | 98708577 NM_172658    | chr1  | 98700291 | 98700895 |
|   | 12 | 98657888 | 98666457 NM_008079    | chr12 | 98665539 | 98665984 |
|   | 12 | 98663707 | 98678575 NM_008152    | chr12 | 98665539 | 98665984 |
|   | 8  | 98599042 | 98607541 NM_001035123 | chr8  | 98600995 | 98601595 |
| X |    | 98451989 | 98460882 NM_007709    | chrX  | 98455088 | 98455844 |
| X |    | 98271416 | 98280023 NM_183318    | chrX  | 98271438 | 98272482 |
|   | 11 | 98252563 | 98261078 NM_025559    | chr11 | 98253971 | 98254887 |
|   | 7  | 98232772 | 98242480 NM_001024619 | chr7  | 98235600 | 98236195 |
|   | 11 | 98222574 | 98231082 NM_001003817 | chr11 | 98229335 | 98230384 |
|   | 14 | 98175825 | 98184787 NM_009769    | chr14 | 98180457 | 98181307 |
|   | 11 | 98158828 | 98177040 NM_021547    | chr11 | 98174261 | 98175022 |
|   | 11 | 98158828 | 98177040 NM_021547    | chr11 | 98165862 | 98166380 |
|   | 11 | 98141934 | 98151738 NM_010895    | chr11 | 98142742 | 98143471 |
|   | 16 | 98105073 | 98113572 BC027135     | chr16 | 98110476 | 98111120 |
|   | 16 | 98105073 | 98113572 BC027135     | chr16 | 98105251 | 98106254 |
|   | 11 | 98013404 | 98021911 NM_026952    | chr11 | 98018139 | 98019170 |
|   | 15 | 97989694 | 97998429 NM_177716    | chr15 | 97996837 | 97997506 |
|   | 15 | 97989694 | 97998429 NM_177716    | chr15 | 97992876 | 97993697 |
|   | 11 | 97963182 | 97971706 NM_028149    | chr11 | 97965026 | 97965620 |

|   |    |          |                    |       |          |          |
|---|----|----------|--------------------|-------|----------|----------|
|   | 8  | 97900861 | 97909360 NM_173036 | chr8  | 97908049 | 97908655 |
|   | 9  | 97840020 | 97848519 NM_022319 | chr9  | 97842200 | 97842813 |
|   | 3  | 97746745 | 97755244 BC054401  | chr3  | 97748732 | 97749334 |
|   | 3  | 97746745 | 97755244 BC054401  | chr3  | 97747402 | 97748118 |
|   | 13 | 97637434 | 97645970 NM_023420 | chr13 | 97642178 | 97642940 |
|   | 11 | 97609762 | 97618276 NM_010688 | chr11 | 97615932 | 97616909 |
| X |    | 97574056 | 97589368 NM_008124 | chrX  | 97586786 | 97587459 |
|   | 7  | 97565883 | 97574382 NM_023671 | chr7  | 97567135 | 97567804 |
|   | 16 | 97563358 | 97573815 NM_010846 | chr16 | 97565301 | 97565913 |
|   | 8  | 97476000 | 97484506 BC027818  | chr8  | 97476325 | 97476939 |
| X |    | 97451247 | 97459966 NM_018789 | chrX  | 97458658 | 97459352 |
|   | 11 | 97443307 | 97451806 NM_175332 | chr11 | 97444387 | 97445370 |
|   | 8  | 97408196 | 97424695 NM_153507 | chr8  | 97422003 | 97422653 |
|   | 8  | 97408196 | 97424695 NM_153507 | chr8  | 97421044 | 97421653 |
|   | 3  | 97290285 | 97298784 BC019641  | chr3  | 97294128 | 97294888 |
|   | 7  | 97269269 | 97277783 NM_024220 | chr7  | 97274977 | 97275734 |
|   | 4  | 97258690 | 97272444 NM_010905 | chr4  | 97270096 | 97270789 |
|   | 11 | 97260250 | 97268749 NM_021493 | chr11 | 97268177 | 97268775 |
|   | 4  | 97258690 | 97272444 NM_010905 | chr4  | 97266916 | 97267998 |
|   | 13 | 97179542 | 97195573 BC058282  | chr13 | 97181438 | 97182027 |
|   | 10 | 97116747 | 97125321 NM_025724 | chr10 | 97122212 | 97122833 |
|   | 6  | 97110385 | 97120346 NM_175313 | chr6  | 97113399 | 97114002 |
|   | 8  | 97097726 | 97106231 NM_172410 | chr8  | 97103279 | 97104084 |
|   | 10 | 97067756 | 97081872 NM_007884 | chr10 | 97077697 | 97078302 |
|   | 10 | 97067756 | 97081872 NM_007884 | chr10 | 97074850 | 97075436 |
|   | 14 | 97050161 | 97058677 NM_007826 | chr14 | 97051066 | 97051669 |
|   | 8  | 96985100 | 96993940 NM_026116 | chr8  | 96987396 | 96987988 |
|   | 7  | 96950943 | 96959467 NM_010248 | chr7  | 96957721 | 96958426 |
|   | 8  | 96899196 | 96907971 NM_011787 | chr8  | 96900992 | 96901991 |
|   | 11 | 96851676 | 96860175 NM_026154 | chr11 | 96852950 | 96853573 |
| X |    | 96822456 | 96831361 NM_008446 | chrX  | 96828008 | 96828610 |
| X |    | 96826127 | 96834657 NM_028303 | chrX  | 96828008 | 96828610 |
| X |    | 96794779 | 96803588 NM_020621 | chrX  | 96796485 | 96797087 |
|   | 3  | 96791468 | 96799967 BC115559  | chr3  | 96792921 | 96793510 |
|   | 13 | 96623408 | 96631917 NM_007974 | chr13 | 96624988 | 96625629 |
|   | 13 | 96419936 | 96428499 NM_028106 | chr13 | 96425728 | 96426392 |
|   | 3  | 96376875 | 96385374 NM_010186 | chr3  | 96378689 | 96379306 |
|   | 3  | 96346239 | 96354738 NM_033596 | chr3  | 96348715 | 96349372 |
|   | 3  | 96348099 | 96357628 NM_175666 | chr3  | 96348715 | 96349372 |
|   | 3  | 96299321 | 96309045 NM_178214 | chr3  | 96304787 | 96305465 |
|   | 16 | 96230078 | 96238639 NM_008251 | chr16 | 96232059 | 96232762 |
|   | 16 | 96184763 | 96193436 NM_145125 | chr16 | 96187432 | 96188426 |
|   | 12 | 96168509 | 96177008 AY495669  | chr12 | 96169748 | 96170514 |
|   | 11 | 96127255 | 96137328 NM_010459 | chr11 | 96133632 | 96134661 |
|   | 11 | 96109164 | 96122181 NM_008268 | chr11 | 96110060 | 96110982 |
|   | 12 | 96082076 | 96090588 NM_201518 | chr12 | 96087514 | 96088457 |
|   | 10 | 96040703 | 96049214 NM_007569 | chr10 | 96047033 | 96047746 |

|    |          |          |              |       |          |          |
|----|----------|----------|--------------|-------|----------|----------|
| 3  | 95987527 | 95996044 | NM_011797    | chr3  | 95990100 | 95990948 |
| 3  | 95973401 | 95981900 | NM_146104    | chr3  | 95978788 | 95979382 |
| 3  | 95974854 | 95983353 | NM_153513    | chr3  | 95978788 | 95979382 |
| 13 | 95970326 | 95978825 | NM_011021    | chr13 | 95971458 | 95972077 |
| 3  | 95965134 | 95973633 | NM_001033302 | chr3  | 95966382 | 95967295 |
| 11 | 95944309 | 95952808 | NM_172799    | chr11 | 95950484 | 95951952 |
| 11 | 95944309 | 95952808 | NM_172799    | chr11 | 95947010 | 95947449 |
| 3  | 95837768 | 95846267 | NM_027931    | chr3  | 95839656 | 95840246 |
| 3  | 95738192 | 95746712 | NM_008562    | chr3  | 95744913 | 95745655 |
| 3  | 95738192 | 95746712 | NM_008562    | chr3  | 95743543 | 95744711 |
| 15 | 95612877 | 95621376 | NM_175344    | chr15 | 95617890 | 95618497 |
| 4  | 95453315 | 95461896 | NM_030014    | chr4  | 95455614 | 95456276 |
| 9  | 95440980 | 95449606 | NM_029620    | chr9  | 95446751 | 95447404 |
| 3  | 95440060 | 95448577 | NM_018877    | chr3  | 95441404 | 95442047 |
| 14 | 95399596 | 95408168 | NM_053105    | chr14 | 95400227 | 95400956 |
| 13 | 95383481 | 95391980 | NM_029153    | chr13 | 95385982 | 95386888 |
| 16 | 95360449 | 95368995 | NM_019664    | chr16 | 95367665 | 95368376 |
| 3  | 95361249 | 95371021 | NM_133858    | chr3  | 95366769 | 95367731 |
| 3  | 95364710 | 95373480 | NM_173347    | chr3  | 95366769 | 95367731 |
| 3  | 95361249 | 95371021 | NM_133858    | chr3  | 95365971 | 95366755 |
| 3  | 95364710 | 95373480 | NM_173347    | chr3  | 95365971 | 95366755 |
| X  | 95332849 | 95341855 | NM_010110    | chrX  | 95338032 | 95338646 |
| 3  | 95324014 | 95332610 | NM_001024841 | chr3  | 95328179 | 95328751 |
| 1  | 95306694 | 95315214 | NM_133808    | chr1  | 95310022 | 95310755 |
| 3  | 95239906 | 95252277 | NM_011351    | chr3  | 95245625 | 95246384 |
| 3  | 95189471 | 95198262 | NM_008847    | chr3  | 95191904 | 95192605 |
| 3  | 95190445 | 95198974 | NM_009336    | chr3  | 95191904 | 95192605 |
| 1  | 95165481 | 95179158 | NM_080850    | chr1  | 95173253 | 95173855 |
| 1  | 95167260 | 95176550 | NM_023200    | chr1  | 95173253 | 95173855 |
| 6  | 95077422 | 95086491 | NM_001008785 | chr6  | 95083397 | 95084041 |
| 1  | 94988855 | 94997354 | NM_172411    | chr1  | 94992758 | 94993405 |
| 11 | 94959854 | 94968353 | NM_007867    | chr11 | 94965694 | 94966395 |
| 10 | 94842380 | 94852516 | NM_007706    | chr10 | 94845282 | 94845989 |
| 11 | 94801302 | 94814663 | NM_172261    | chr11 | 94807729 | 94808629 |
| 11 | 94801302 | 94814663 | NM_172261    | chr11 | 94805484 | 94806086 |
| 1  | 94758782 | 94767759 | NM_011796    | chr1  | 94759380 | 94760038 |
| 8  | 94688003 | 94696782 | NM_008393    | chr8  | 94695243 | 94696057 |
| 16 | 94473537 | 94482054 | BC049277     | chr16 | 94479320 | 94479910 |
| 16 | 94476519 | 94485813 | NM_019543    | chr16 | 94479320 | 94479910 |
| 5  | 94336461 | 94345470 | NM_007635    | chr5  | 94341562 | 94342226 |
| 11 | 94287316 | 94307400 | NM_009783    | chr11 | 94294688 | 94295295 |
| 5  | 94278733 | 94287640 | NM_017367    | chr5  | 94283367 | 94283982 |
| 5  | 94278733 | 94287640 | NM_017367    | chr5  | 94281785 | 94282374 |
| 8  | 94197637 | 94206163 | NM_011936    | chr8  | 94203033 | 94203650 |
| 8  | 94200868 | 94209367 | NM_173431    | chr8  | 94203033 | 94203650 |
| 5  | 94162655 | 94171253 | NM_001009818 | chr5  | 94168119 | 94169038 |
| 4  | 94092612 | 94101269 | NM_172695    | chr4  | 94094844 | 94095595 |

|    |          |          |              |       |          |          |
|----|----------|----------|--------------|-------|----------|----------|
| 8  | 94021548 | 94030570 | NM_010241    | chr8  | 94029266 | 94029795 |
| 13 | 93893012 | 93901511 | NM_011582    | chr13 | 93894439 | 93895039 |
| 11 | 93851237 | 93859762 | NM_011289    | chr11 | 93852000 | 93853032 |
| 11 | 93806181 | 93814760 | NM_027569    | chr11 | 93812539 | 93813274 |
| 11 | 93781847 | 93790611 | NM_008704    | chr11 | 93783880 | 93784897 |
| 16 | 93766441 | 93775520 | NM_028083    | chr16 | 93774402 | 93775059 |
| 5  | 93752639 | 93761138 | NM_015756    | chr5  | 93758486 | 93759176 |
| 10 | 93622803 | 93631307 | NM_025551    | chr10 | 93629557 | 93630159 |
| 13 | 93520649 | 93529359 | NM_175455    | chr13 | 93526280 | 93526861 |
| 5  | 93421551 | 93430079 | NM_021274    | chr5  | 93425109 | 93425797 |
| 1  | 93319073 | 93327599 | NM_028718    | chr1  | 93320265 | 93321303 |
| 10 | 93317059 | 93327001 | NM_019648    | chr10 | 93320208 | 93320814 |
| 3  | 93098569 | 93110463 | NM_025420    | chr3  | 93109696 | 93110367 |
| 17 | 93084939 | 93093438 | BC017130     | chr17 | 93085517 | 93086227 |
| 3  | 93071629 | 93080128 | NM_001018079 | chr3  | 93079028 | 93079611 |
| 10 | 93065000 | 93073665 | NM_021320    | chr10 | 93071632 | 93072388 |
| 3  | 93009134 | 93017633 | NM_001039594 | chr3  | 93010152 | 93010895 |
| 3  | 92861803 | 92870302 | NM_029667    | chr3  | 92866431 | 92866923 |
| 4  | 92825030 | 92833529 | NM_026954    | chr4  | 92829670 | 92830276 |
| 2  | 92822795 | 92832686 | NM_001002794 | chr2  | 92829052 | 92829510 |
| 4  | 92825030 | 92833529 | NM_026954    | chr4  | 92828246 | 92828755 |
| 3  | 92803254 | 92811753 | NM_026394    | chr3  | 92805212 | 92805884 |
| 6  | 92775982 | 92784481 | NM_175209    | chr6  | 92780406 | 92781035 |
| 16 | 92712052 | 92720551 | BC069929     | chr16 | 92715808 | 92716581 |
| 16 | 92583688 | 92592187 | NM_009821    | chr16 | 92583970 | 92584597 |
| 3  | 92521676 | 92530182 | NM_009265    | chr3  | 92522960 | 92523610 |
| 5  | 92475520 | 92484113 | NM_007568    | chr5  | 92479488 | 92479991 |
| 7  | 92430411 | 92438910 | NM_025515    | chr7  | 92433827 | 92434478 |
| 3  | 92418543 | 92428136 | NM_011470    | chr3  | 92427420 | 92427976 |
| 3  | 92396108 | 92405188 | NM_011469    | chr3  | 92397542 | 92398094 |
| 13 | 92277901 | 92287944 | NM_145453    | chr13 | 92280092 | 92280690 |
| 2  | 92257559 | 92267357 | NM_211358    | chr2  | 92258157 | 92258725 |
| 2  | 92199493 | 92208102 | NM_011162    | chr2  | 92205653 | 92206252 |
| 16 | 92175248 | 92196646 | NM_134110    | chr16 | 92191759 | 92192347 |
| 16 | 92175248 | 92196646 | NM_134110    | chr16 | 92189422 | 92190104 |
| 2  | 92169229 | 92177872 | NM_172670    | chr2  | 92171114 | 92171717 |
| 2  | 92170337 | 92186256 | NM_145122    | chr2  | 92171114 | 92171717 |
| 3  | 92166558 | 92175069 | NM_008508    | chr3  | 92168636 | 92169279 |
| 6  | 92098498 | 92107799 | NM_011630    | chr6  | 92100790 | 92101382 |
| 9  | 92073491 | 92082106 | NM_008880    | chr9  | 92081695 | 92082076 |
| 12 | 91992637 | 92002044 | NM_175335    | chr12 | 91995833 | 91996471 |
| 15 | 91950308 | 91958873 | NM_007727    | chr15 | 91958301 | 91958838 |
| 8  | 91930045 | 91940267 | NM_021390    | chr8  | 91936344 | 91937101 |
| 8  | 91930045 | 91940267 | NM_021390    | chr8  | 91933678 | 91934484 |
| 2  | 91761939 | 91770438 | NM_138306    | chr2  | 91769550 | 91770231 |
| 1  | 91759474 | 91768347 | NM_010262    | chr1  | 91766382 | 91766985 |
| 1  | 91759474 | 91768347 | NM_010262    | chr1  | 91762727 | 91763384 |

|    |          |          |              |       |          |          |
|----|----------|----------|--------------|-------|----------|----------|
| 16 | 91612368 | 91620867 | NM_010587    | chr16 | 91616887 | 91617589 |
| 16 | 91614959 | 91623458 | NM_133679    | chr16 | 91616887 | 91617589 |
| 5  | 91559937 | 91568450 | NM_007423    | chr5  | 91566816 | 91567598 |
| 16 | 91529500 | 91541831 | NM_010256    | chr16 | 91540762 | 91541417 |
| 5  | 91530101 | 91538614 | NM_009654    | chr5  | 91536709 | 91537349 |
| 16 | 91529500 | 91541831 | NM_010256    | chr16 | 91536644 | 91537255 |
| 16 | 91529500 | 91541831 | NM_010256    | chr16 | 91534769 | 91535338 |
| 16 | 91484040 | 91492539 | NM_030018    | chr16 | 91485600 | 91486688 |
| 2  | 91474290 | 91482789 | BC024457     | chr2  | 91481014 | 91481718 |
| 2  | 91445043 | 91456546 | NM_146124    | chr2  | 91451000 | 91451638 |
| 2  | 91448131 | 91456630 | NM_001033451 | chr2  | 91451000 | 91451638 |
| 6  | 91433217 | 91441767 | NM_028766    | chr6  | 91439638 | 91440369 |
| 8  | 91249759 | 91258261 | NM_012047    | chr8  | 91251528 | 91252351 |
| 9  | 91170104 | 91178603 | D78174       | chr9  | 91174610 | 91175229 |
| 9  | 91160877 | 91169376 | NM_009576    | chr9  | 91166817 | 91167582 |
| 9  | 91160951 | 91169704 | NM_009573    | chr9  | 91166817 | 91167582 |
| 2  | 90912983 | 90921508 | NM_008653    | chr2  | 90919525 | 90920117 |
| 2  | 90912983 | 90921508 | NM_008653    | chr2  | 90913064 | 90913887 |
| 2  | 90867080 | 90877122 | NM_026721    | chr2  | 90870811 | 90872218 |
| 2  | 90848921 | 90857477 | NM_008948    | chr2  | 90855028 | 90855819 |
| 2  | 90812510 | 90822225 | BC002221     | chr2  | 90819829 | 90820605 |
| 3  | 90806838 | 90815337 | NM_207263    | chr3  | 90812368 | 90813029 |
| 4  | 90798375 | 90806874 | AY035380     | chr4  | 90806098 | 90806809 |
| 3  | 90734229 | 90743917 | NM_199422    | chr3  | 90742380 | 90743114 |
| 15 | 90589946 | 90598456 | BC055720     | chr15 | 90597988 | 90598412 |
| 3  | 90583536 | 90610790 | NM_023215    | chr3  | 90594673 | 90595444 |
| 3  | 90591452 | 90603186 | NM_009113    | chr3  | 90594673 | 90595444 |
| 3  | 90516599 | 90525563 | NM_145540    | chr3  | 90519987 | 90520645 |
| X  | 90373120 | 90382126 | NM_001044386 | chrX  | 90375521 | 90376920 |
| X  | 90373120 | 90382126 | NM_001044386 | chrX  | 90373813 | 90374556 |
| 8  | 90359902 | 90368401 | NM_019626    | chr8  | 90359927 | 90360758 |
| 7  | 90267410 | 90275909 | AB057757     | chr7  | 90274202 | 90275378 |
| 7  | 90249838 | 90265133 | NM_001040086 | chr7  | 90258700 | 90259372 |
| 6  | 90162321 | 90170820 | NM_053223    | chr6  | 90168563 | 90169290 |
| 1  | 90098080 | 90114750 | NM_198652    | chr1  | 90104623 | 90105260 |
| 3  | 90082073 | 90090624 | NM_011826    | chr3  | 90083322 | 90084047 |
| 2  | 90064768 | 90073267 | NM_146793    | chr2  | 90066456 | 90067429 |
| 2  | 90051326 | 90059825 | NM_146984    | chr2  | 90053100 | 90054279 |
| 16 | 90030129 | 90038628 | BC065126     | chr16 | 90032300 | 90033158 |
| 3  | 89996590 | 90005089 | NM_010559    | chr3  | 90000258 | 90000853 |
| 2  | 89948376 | 89956875 | NM_146985    | chr2  | 89949845 | 89950500 |
| 6  | 89935675 | 89944174 | NM_053229    | chr6  | 89941287 | 89941889 |
| 2  | 89909727 | 89926456 | NM_146342    | chr2  | 89921899 | 89922501 |
| X  | 89882352 | 89890874 | NM_008892    | chrX  | 89884641 | 89885483 |
| 16 | 89847187 | 89855686 | NM_009384    | chr16 | 89852382 | 89853434 |
| 3  | 89847854 | 89856512 | NM_009602    | chr3  | 89850212 | 89851126 |
| 17 | 89816245 | 89824755 | D55720       | chr17 | 89820712 | 89821375 |

|    |          |          |              |       |          |          |
|----|----------|----------|--------------|-------|----------|----------|
| 3  | 89810711 | 89819237 | NM_019655    | chr3  | 89818436 | 89819077 |
| 17 | 89816245 | 89824755 | D55720       | chr17 | 89817387 | 89818019 |
| 5  | 89748233 | 89756732 | NM_178700    | chr5  | 89755639 | 89756211 |
| 2  | 89675667 | 89684166 | NM_146982    | chr2  | 89681877 | 89682509 |
| 6  | 89673844 | 89682343 | NM_053228    | chr6  | 89680255 | 89680852 |
| 2  | 89587690 | 89596189 | NM_146476    | chr2  | 89589482 | 89590120 |
| 2  | 89520546 | 89529045 | NM_207568    | chr2  | 89521964 | 89522565 |
| 8  | 89508212 | 89516711 | NM_025827    | chr8  | 89514061 | 89514677 |
| 7  | 89501914 | 89510509 | NM_181407    | chr7  | 89508162 | 89508753 |
| 15 | 89390093 | 89399607 | NM_013455    | chr15 | 89394632 | 89395482 |
| 5  | 89385873 | 89394381 | NM_008644    | chr5  | 89393669 | 89394255 |
| 7  | 89390279 | 89398778 | NM_029614    | chr7  | 89392082 | 89392761 |
| 3  | 89308979 | 89317532 | NM_013605    | chr3  | 89309725 | 89310359 |
| 15 | 89301380 | 89311192 | NM_009713    | chr15 | 89305248 | 89305851 |
| 15 | 89301380 | 89311192 | NM_009713    | chr15 | 89302639 | 89303312 |
| 3  | 89295134 | 89303659 | NM_013691    | chr3  | 89301738 | 89302314 |
| 3  | 89297333 | 89305853 | NM_013604    | chr3  | 89301738 | 89302314 |
| 15 | 89199086 | 89213021 | NM_138302    | chr15 | 89202363 | 89203026 |
| 11 | 89115611 | 89124110 | NM_008711    | chr11 | 89118020 | 89118922 |
| 2  | 89095608 | 89110429 | NM_146454    | chr2  | 89101384 | 89101987 |
| 2  | 89095608 | 89110429 | NM_146454    | chr2  | 89099266 | 89099904 |
| 5  | 89048012 | 89056511 | NM_027631    | chr5  | 89055046 | 89055614 |
| 2  | 89048115 | 89056614 | NM_146971    | chr2  | 89050751 | 89051345 |
| 2  | 89048115 | 89056614 | NM_146971    | chr2  | 89049536 | 89050172 |
| 1  | 89030981 | 89048010 | NM_023314    | chr1  | 89037661 | 89038509 |
| 1  | 88983697 | 88993527 | NM_021306    | chr1  | 88986113 | 88986697 |
| 10 | 88933927 | 88942428 | NM_009108    | chr10 | 88940485 | 88941101 |
| 15 | 88910873 | 88919372 | NM_027905    | chr15 | 88913079 | 88913762 |
| 3  | 88891564 | 88908824 | BC059914     | chr3  | 88906774 | 88907361 |
| 2  | 88822341 | 88830840 | NM_146901    | chr2  | 88824086 | 88825025 |
| 6  | 88805008 | 88813541 | NM_030251    | chr6  | 88808650 | 88809364 |
| 2  | 88800626 | 88809125 | NM_146459    | chr2  | 88806435 | 88807044 |
| 2  | 88800626 | 88809125 | NM_146459    | chr2  | 88802317 | 88802979 |
| 16 | 88782809 | 88791309 | NM_010676    | chr16 | 88790588 | 88791215 |
| 16 | 88711868 | 88720368 | NM_013713    | chr16 | 88718968 | 88719504 |
| 16 | 88712478 | 88720993 | NM_013707    | chr16 | 88718968 | 88719504 |
| 2  | 88695935 | 88704434 | NM_146778    | chr2  | 88700505 | 88701279 |
| 10 | 88685090 | 88693589 | NM_178773    | chr10 | 88691708 | 88692388 |
| 16 | 88660566 | 88669065 | NM_027170    | chr16 | 88663386 | 88664107 |
| 2  | 88646791 | 88655290 | NM_146463    | chr2  | 88652037 | 88653143 |
| 2  | 88625958 | 88634457 | NM_146896    | chr2  | 88632084 | 88633067 |
| 16 | 88611721 | 88620220 | NM_183189    | chr16 | 88619569 | 88620166 |
| 15 | 88601285 | 88609784 | BC092524     | chr15 | 88606900 | 88607634 |
| 2  | 88589223 | 88597722 | NM_146895    | chr2  | 88595390 | 88596151 |
| 3  | 88586621 | 88595234 | NM_001002011 | chr3  | 88588188 | 88588918 |
| 2  | 88545226 | 88553725 | NM_207567    | chr2  | 88549785 | 88550387 |
| 1  | 88499176 | 88507743 | NM_010933    | chr1  | 88506366 | 88506956 |

|    |          |          |              |       |          |          |
|----|----------|----------|--------------|-------|----------|----------|
| 12 | 88485798 | 88498389 | NM_178657    | chr12 | 88491278 | 88491923 |
| 3  | 88452978 | 88461639 | NM_031368    | chr3  | 88460243 | 88460838 |
| 17 | 88432584 | 88441083 | NM_028658    | chr17 | 88438808 | 88439421 |
| 17 | 88432584 | 88441083 | NM_028658    | chr17 | 88436070 | 88436695 |
| 12 | 88324421 | 88345934 | NM_001013372 | chr12 | 88333171 | 88333781 |
| 12 | 88327015 | 88335514 | NM_026958    | chr12 | 88333171 | 88333781 |
| 2  | 88320424 | 88328923 | NM_146530    | chr2  | 88326485 | 88327077 |
| 7  | 88299465 | 88308004 | NM_028238    | chr7  | 88301653 | 88302242 |
| 2  | 88281573 | 88290072 | NM_146823    | chr2  | 88286485 | 88287084 |
| 2  | 88281573 | 88290072 | NM_146823    | chr2  | 88284358 | 88284948 |
| 10 | 88194422 | 88202921 | AB052760     | chr10 | 88196809 | 88197450 |
| 3  | 88155480 | 88170231 | NM_172526    | chr3  | 88168098 | 88168706 |
| 4  | 88145588 | 88168499 | NM_008336    | chr4  | 88165328 | 88166359 |
| 4  | 88145588 | 88168499 | NM_008336    | chr4  | 88158341 | 88158809 |
| 3  | 88155480 | 88170231 | NM_172526    | chr3  | 88157481 | 88158487 |
| 12 | 88086833 | 88095332 | NM_001033475 | chr12 | 88088999 | 88089612 |
| 2  | 88073387 | 88081886 | NM_207566    | chr2  | 88079615 | 88080232 |
| 4  | 88061117 | 88080607 | NM_177361    | chr4  | 88069509 | 88070139 |
| 1  | 87998811 | 88007310 | BC028964     | chr1  | 88002231 | 88002621 |
| 4  | 87991526 | 88000025 | NM_010510    | chr4  | 87991581 | 87992105 |
| 8  | 87944233 | 87975939 | NM_010764    | chr8  | 87972735 | 87973589 |
| 8  | 87968275 | 87977411 | NM_026399    | chr8  | 87972735 | 87973589 |
| 8  | 87944233 | 87975939 | NM_010764    | chr8  | 87961940 | 87962749 |
| 11 | 87909444 | 87918002 | NM_198013    | chr11 | 87914258 | 87915088 |
| 2  | 87892274 | 87908824 | NM_146641    | chr2  | 87901937 | 87902529 |
| 18 | 87884543 | 87893042 | AF033381     | chr18 | 87884793 | 87885143 |
| 8  | 87866301 | 87874853 | NM_008416    | chr8  | 87866700 | 87867313 |
| 3  | 87843816 | 87860880 | NM_028460    | chr3  | 87846110 | 87847080 |
| 2  | 87819563 | 87828062 | NM_146848    | chr2  | 87824885 | 87825499 |
| 5  | 87817869 | 87826376 | NM_172880    | chr5  | 87819502 | 87820251 |
| 10 | 87802931 | 87811430 | NM_001004164 | chr10 | 87810704 | 87811348 |
| 8  | 87786033 | 87801325 | NM_010062    | chr8  | 87794702 | 87795292 |
| 8  | 87781308 | 87790026 | NM_008097    | chr8  | 87782203 | 87782847 |
| 2  | 87773003 | 87781502 | NM_054091    | chr2  | 87774529 | 87775430 |
| 2  | 87761230 | 87769729 | NM_146849    | chr2  | 87761254 | 87762229 |
| 6  | 87737777 | 87746281 | NM_018762    | chr6  | 87741884 | 87742548 |
| 6  | 87635206 | 87643809 | NM_024251    | chr6  | 87638821 | 87639168 |
| 1  | 87618956 | 87629033 | NM_133781    | chr1  | 87624563 | 87625193 |
| 8  | 87585562 | 87594441 | NM_008535    | chr8  | 87593363 | 87593980 |
| 11 | 87586326 | 87595787 | NM_172449    | chr11 | 87588612 | 87589209 |
| 8  | 87585562 | 87594441 | NM_008535    | chr8  | 87588312 | 87589142 |
| 9  | 87526639 | 87535206 | NM_023814    | chr9  | 87532316 | 87532932 |
| 9  | 87526639 | 87535206 | NM_023814    | chr9  | 87528272 | 87529739 |
| 4  | 87502004 | 87510638 | NM_027326    | chr4  | 87503053 | 87503639 |
| 2  | 87444461 | 87452960 | NM_146351    | chr2  | 87446001 | 87446637 |
| 3  | 87437855 | 87446401 | NM_009690    | chr3  | 87444201 | 87444588 |
| 10 | 87390470 | 87398969 | M30774       | chr10 | 87393188 | 87393910 |

|    |          |          |              |       |          |          |
|----|----------|----------|--------------|-------|----------|----------|
| 11 | 87389185 | 87399825 | NM_011129    | chr11 | 87391603 | 87392288 |
| 16 | 87382524 | 87391053 | NM_009840    | chr16 | 87385090 | 87385765 |
| 3  | 87346953 | 87355520 | NM_030707    | chr3  | 87348511 | 87349070 |
| 2  | 87320888 | 87335373 | NM_206823    | chr2  | 87332957 | 87333550 |
| 8  | 87299469 | 87308195 | NM_007578    | chr8  | 87306848 | 87307449 |
| 10 | 87282867 | 87297027 | NM_184052    | chr10 | 87291529 | 87292166 |
| 3  | 87257978 | 87266477 | BC023765     | chr3  | 87259192 | 87259894 |
| 10 | 87255662 | 87264161 | BC028536     | chr10 | 87255708 | 87256202 |
| 5  | 87140335 | 87148888 | NM_019992    | chr5  | 87146119 | 87146908 |
| 3  | 87066485 | 87075012 | NM_007640    | chr3  | 87072565 | 87073182 |
| 11 | 86919426 | 86927955 | NM_025377    | chr11 | 86925519 | 86926170 |
| 11 | 86922385 | 86930884 | NM_175563    | chr11 | 86925519 | 86926170 |
| 11 | 86887744 | 86896251 | NM_025638    | chr11 | 86889244 | 86889893 |
| 17 | 86865437 | 86874127 | NM_145491    | chr17 | 86872519 | 86873303 |
| 17 | 86850897 | 86862213 | NM_029121    | chr17 | 86851141 | 86851850 |
| 2  | 86757796 | 86766295 | NM_146768    | chr2  | 86759092 | 86759690 |
| 12 | 86707779 | 86718051 | BC035276     | chr12 | 86708048 | 86708637 |
| 7  | 86649070 | 86657593 | NM_016770    | chr7  | 86651892 | 86652678 |
| 6  | 86632180 | 86640747 | NM_010751    | chr6  | 86634624 | 86635226 |
| 2  | 86553076 | 86561575 | NM_146847    | chr2  | 86554914 | 86555723 |
| 8  | 86536783 | 86559467 | NM_013641    | chr8  | 86548005 | 86548617 |
| 8  | 86492298 | 86500909 | NM_018808    | chr8  | 86499901 | 86500797 |
| 6  | 86489081 | 86497799 | NM_011865    | chr6  | 86491847 | 86492725 |
| 2  | 86456796 | 86465295 | NM_146590    | chr2  | 86458442 | 86459040 |
| 12 | 86357004 | 86365503 | NM_010234    | chr12 | 86363359 | 86364155 |
| 7  | 86282122 | 86290624 | NM_212436    | chr7  | 86287961 | 86288586 |
| 7  | 86237597 | 86246096 | NM_146616    | chr7  | 86239383 | 86239982 |
| 8  | 86220031 | 86228552 | NM_178736    | chr8  | 86221808 | 86222988 |
| 7  | 86209656 | 86218155 | NM_146617    | chr7  | 86212619 | 86213351 |
| 2  | 86184756 | 86193255 | NM_146391    | chr2  | 86186624 | 86187214 |
| 7  | 86172022 | 86188872 | NM_001011866 | chr7  | 86184344 | 86184962 |
| 3  | 86165250 | 86173749 | BC031117     | chr3  | 86170072 | 86170690 |
| 12 | 86152888 | 86165679 | BC079861     | chr12 | 86156051 | 86156643 |
| 12 | 86102584 | 86111115 | NM_145445    | chr12 | 86105854 | 86106455 |
| 15 | 86036225 | 86044724 | NM_145476    | chr15 | 86037308 | 86038243 |
| 12 | 85993035 | 86001534 | NM_175198    | chr12 | 85994851 | 85995559 |
| 12 | 85993940 | 86002498 | NM_030225    | chr12 | 85994851 | 85995559 |
| 2  | 85980449 | 85988948 | NM_146583    | chr2  | 85985253 | 85985869 |
| 15 | 85879473 | 85887972 | NM_172611    | chr15 | 85885167 | 85885755 |
| 12 | 85854055 | 85862554 | NM_028632    | chr12 | 85859881 | 85860558 |
| 2  | 85841323 | 85849822 | NM_001011872 | chr2  | 85848795 | 85849391 |
| 6  | 85794994 | 85803740 | NM_023455    | chr6  | 85801595 | 85802205 |
| 3  | 85654054 | 85662555 | NM_144896    | chr3  | 85654367 | 85655225 |
| 2  | 85640129 | 85649075 | NM_147015    | chr2  | 85641832 | 85642547 |
| 9  | 85633128 | 85642101 | NM_011627    | chr9  | 85639711 | 85640474 |
| 2  | 85558714 | 85567213 | NM_146568    | chr2  | 85560402 | 85561156 |
| 12 | 85504619 | 85513161 | NM_008992    | chr12 | 85506849 | 85507339 |



|    |          |          |              |       |          |          |
|----|----------|----------|--------------|-------|----------|----------|
| 2  | 85446659 | 85471294 | NM_013728    | chr2  | 85464417 | 85465254 |
| 2  | 85446659 | 85471294 | NM_013728    | chr2  | 85454188 | 85455142 |
| 2  | 85385381 | 85393880 | NM_146436    | chr2  | 85391197 | 85391883 |
| 12 | 85286662 | 85304777 | NM_001026214 | chr12 | 85289283 | 85289880 |
| 12 | 85245744 | 85254294 | NM_172582    | chr12 | 85254200 | 85254781 |
| 12 | 85249063 | 85257571 | NM_172581    | chr12 | 85254200 | 85254781 |
| 2  | 85198871 | 85207370 | NM_146865    | chr2  | 85200720 | 85201503 |
| 12 | 85035488 | 85044174 | NM_027438    | chr12 | 85036766 | 85037446 |
| 2  | 84995039 | 85003538 | NM_001033346 | chr2  | 84997153 | 84997745 |
| 17 | 84876378 | 84884877 | U09218       | chr17 | 84881304 | 84882063 |
| 2  | 84832040 | 84840610 | NM_182990    | chr2  | 84838249 | 84838853 |
| 2  | 84833827 | 84842673 | NM_145526    | chr2  | 84838249 | 84838853 |
| 12 | 84809107 | 84817606 | BC033459     | chr12 | 84811696 | 84812515 |
| 15 | 84745167 | 84753693 | NM_016714    | chr15 | 84751129 | 84752001 |
| 11 | 84730042 | 84738551 | NM_001005223 | chr11 | 84734793 | 84735385 |
| 2  | 84685032 | 84693531 | NM_199223    | chr2  | 84687105 | 84688065 |
| 10 | 84611790 | 84620853 | NM_007771    | chr10 | 84613538 | 84614147 |
| 2  | 84469041 | 84484886 | NM_025868    | chr2  | 84478784 | 84479607 |
| 2  | 84473264 | 84481763 | NM_025885    | chr2  | 84478784 | 84479607 |
| 2  | 84469041 | 84484886 | NM_025868    | chr2  | 84472753 | 84473407 |
| 2  | 84473264 | 84481763 | NM_025885    | chr2  | 84472753 | 84473407 |
| 10 | 84341415 | 84349954 | NM_183172    | chr10 | 84348592 | 84349197 |
| 10 | 84261947 | 84270446 | NM_027689    | chr10 | 84262279 | 84262730 |
| 18 | 84216351 | 84224850 | NM_146090    | chr18 | 84221026 | 84221616 |
| 10 | 84179847 | 84188492 | NM_001024918 | chr10 | 84185150 | 84185904 |
| 15 | 84146486 | 84155031 | NM_022321    | chr15 | 84152210 | 84152815 |
| 13 | 84045103 | 84053617 | BC037731     | chr13 | 84052404 | 84052997 |
| 15 | 84014006 | 84022505 | NM_178614    | chr15 | 84015789 | 84016405 |
| 3  | 83846248 | 83854955 | NM_009144    | chr3  | 83851783 | 83852722 |
| 7  | 83668512 | 83677018 | NM_029335    | chr7  | 83671085 | 83671689 |
| 11 | 83661064 | 83671654 | NM_009330    | chr11 | 83665912 | 83666598 |
| 6  | 83619235 | 83627774 | NM_016751    | chr6  | 83622512 | 83623237 |
| 15 | 83613717 | 83622216 | BC057550     | chr15 | 83615703 | 83616507 |
| 17 | 83608525 | 83617034 | NM_054082    | chr17 | 83612777 | 83613241 |
| 15 | 83601789 | 83610288 | NM_172610    | chr15 | 83607167 | 83607727 |
| 12 | 83529886 | 83538681 | NM_015812    | chr12 | 83533808 | 83534533 |
| 6  | 83470128 | 83478627 | NM_013764    | chr6  | 83477267 | 83477883 |
| 15 | 83420377 | 83428886 | NM_183017    | chr15 | 83424145 | 83424749 |
| 9  | 83339048 | 83347547 | NM_172507    | chr9  | 83340678 | 83341277 |
| 6  | 83285709 | 83294242 | NM_145571    | chr6  | 83291630 | 83292152 |
| 17 | 83253308 | 83261825 | NM_199466    | chr17 | 83259128 | 83259736 |
| 15 | 83175441 | 83184013 | NM_025445    | chr15 | 83183026 | 83183745 |
| 3  | 83135465 | 83143994 | NM_016784    | chr3  | 83141252 | 83141868 |
| 6  | 83095545 | 83105267 | NM_133641    | chr6  | 83102685 | 83103368 |
| 3  | 83087784 | 83096322 | NM_133862    | chr3  | 83088430 | 83089035 |
| 15 | 83076996 | 83085495 | NM_001004150 | chr15 | 83083668 | 83084287 |
| 6  | 83062783 | 83083663 | NM_020619    | chr6  | 83082665 | 83083440 |

|    |          |          |              |       |          |          |
|----|----------|----------|--------------|-------|----------|----------|
| 6  | 83038048 | 83054527 | NM_197992    | chr6  | 83048957 | 83049562 |
| 6  | 83017594 | 83026229 | NM_019752    | chr6  | 83021820 | 83022593 |
| 3  | 82987398 | 82995901 | NM_023624    | chr3  | 82989427 | 82990108 |
| 15 | 82974532 | 82983118 | NM_178627    | chr15 | 82977288 | 82977890 |
| 11 | 82927040 | 82935543 | NM_011407    | chr11 | 82930982 | 82931760 |
| 1  | 82914956 | 82923472 | NM_030556    | chr1  | 82916864 | 82918062 |
| 1  | 82712507 | 82721029 | NM_010472    | chr1  | 82718597 | 82719200 |
| 15 | 82680197 | 82691014 | U20282       | chr15 | 82684117 | 82684871 |
| 18 | 82682891 | 82691473 | NM_001025251 | chr18 | 82683026 | 82683611 |
| 15 | 82515325 | 82524265 | BC059104     | chr15 | 82515520 | 82516193 |
| 15 | 82467292 | 82475791 | NM_133695    | chr15 | 82471917 | 82472519 |
| 15 | 82446174 | 82454673 | NM_145474    | chr15 | 82451035 | 82451421 |
| 15 | 82201286 | 82213926 | NM_019823    | chr15 | 82206069 | 82206667 |
| 11 | 82199095 | 82207594 | NM_023438    | chr11 | 82200426 | 82201036 |
| 13 | 82182754 | 82191253 | NM_028372    | chr13 | 82187020 | 82187680 |
| 13 | 82185781 | 82194304 | BC066818     | chr13 | 82187020 | 82187680 |
| 15 | 82162687 | 82176352 | NM_177391    | chr15 | 82173748 | 82174371 |
| 11 | 81993499 | 82002007 | NM_011329    | chr11 | 81997107 | 81997705 |
| 11 | 81925387 | 81933886 | NM_021443    | chr11 | 81932042 | 81932900 |
| 15 | 81785620 | 81794124 | NM_013872    | chr15 | 81787164 | 81787753 |
| 15 | 81668455 | 81692051 | NM_020507    | chr15 | 81687498 | 81688204 |
| 12 | 81677036 | 81685535 | NM_001008423 | chr12 | 81677215 | 81678002 |
| 15 | 81632683 | 81641234 | NM_017376    | chr15 | 81638695 | 81639287 |
| 15 | 81632683 | 81641234 | NM_017376    | chr15 | 81637380 | 81638100 |
| 7  | 81437995 | 81446494 | NM_172904    | chr7  | 81445202 | 81445835 |
| 7  | 81438791 | 81447956 | NM_001004185 | chr7  | 81445202 | 81445835 |
| 7  | 81364669 | 81377794 | NM_021492    | chr7  | 81374476 | 81375068 |
| 15 | 81287571 | 81296124 | NM_019712    | chr15 | 81294924 | 81295542 |
| 15 | 81221443 | 81229942 | NM_177310    | chr15 | 81227569 | 81228387 |
| 18 | 81146138 | 81154637 | NM_178280    | chr18 | 81149650 | 81150584 |
| 18 | 81146138 | 81154637 | NM_178280    | chr18 | 81147664 | 81148397 |
| 8  | 81103414 | 81111913 | NM_183096    | chr8  | 81104014 | 81104641 |
| 7  | 81093888 | 81102387 | AF106620     | chr7  | 81100128 | 81100717 |
| 15 | 81056824 | 81065528 | NM_145132    | chr15 | 81064013 | 81064620 |
| 10 | 81038068 | 81054687 | BC017633     | chr10 | 81041883 | 81042538 |
| 10 | 81026676 | 81035175 | NM_027480    | chr10 | 81032305 | 81033125 |
| 10 | 81028188 | 81036687 | NM_181586    | chr10 | 81032305 | 81033125 |
| 10 | 81003437 | 81011936 | NM_001033363 | chr10 | 81009097 | 81009709 |
| 3  | 80886078 | 80894718 | NM_013540    | chr3  | 80886738 | 80887607 |
| 10 | 80797762 | 80806261 | BC055405     | chr10 | 80803010 | 80803718 |
| 10 | 80573788 | 80589546 | NM_007907    | chr10 | 80584613 | 80585207 |
| 10 | 80573788 | 80589546 | NM_007907    | chr10 | 80580203 | 80582094 |
| 10 | 80533400 | 80543662 | NM_010731    | chr10 | 80539346 | 80539964 |
| 10 | 80493231 | 80508001 | NM_145365    | chr10 | 80495978 | 80497004 |
| 4  | 80375917 | 80384544 | NM_026821    | chr4  | 80383416 | 80384035 |
| 10 | 80244660 | 80253159 | NM_001013758 | chr10 | 80246591 | 80247249 |
| 11 | 80238823 | 80247347 | NM_178616    | chr11 | 80244590 | 80245199 |

|    |          |          |              |       |          |          |
|----|----------|----------|--------------|-------|----------|----------|
| 7  | 80234476 | 80250699 | NM_172903    | chr7  | 80244452 | 80245071 |
| 7  | 80210637 | 80219136 | NM_026812    | chr7  | 80214243 | 80215103 |
| 7  | 80211222 | 80219721 | NM_133952    | chr7  | 80214243 | 80215103 |
| 7  | 80210637 | 80219136 | NM_026812    | chr7  | 80212731 | 80213455 |
| 7  | 80211222 | 80219721 | NM_133952    | chr7  | 80212731 | 80213455 |
| 10 | 80191534 | 80210876 | NM_013651    | chr10 | 80201737 | 80202665 |
| 10 | 80198854 | 80207716 | NM_023900    | chr10 | 80201737 | 80202665 |
| 11 | 80191692 | 80200194 | NM_027472    | chr11 | 80199510 | 80200250 |
| 11 | 80193474 | 80202084 | NM_011751    | chr11 | 80199510 | 80200250 |
| 7  | 80162030 | 80170529 | NM_145150    | chr7  | 80167900 | 80168410 |
| 10 | 80152335 | 80160836 | NM_199322    | chr10 | 80158029 | 80158661 |
| 12 | 80121754 | 80130270 | NM_030017    | chr12 | 80123418 | 80124054 |
| 10 | 80099313 | 80108395 | NM_027829    | chr10 | 80104134 | 80104808 |
| 10 | 80102450 | 80119355 | BC058238     | chr10 | 80104134 | 80104808 |
| 7  | 80066125 | 80074624 | DQ073331     | chr7  | 80072441 | 80073168 |
| 15 | 80055375 | 80063874 | NM_178719    | chr15 | 80060725 | 80061390 |
| 17 | 79968032 | 79976660 | NM_144802    | chr17 | 79970759 | 79971398 |
| 11 | 79951723 | 79964314 | NM_183275    | chr11 | 79957603 | 79958280 |
| 12 | 79923618 | 79932177 | NM_178745    | chr12 | 79925060 | 79925672 |
| 12 | 79774908 | 79783431 | NM_026114    | chr12 | 79782459 | 79783126 |
| 12 | 79777841 | 79786478 | NM_023721    | chr12 | 79782459 | 79783126 |
| 12 | 79774908 | 79783431 | NM_026114    | chr12 | 79781806 | 79782437 |
| 12 | 79777841 | 79786478 | NM_023721    | chr12 | 79781806 | 79782437 |
| 7  | 79713298 | 79721865 | NM_008486    | chr7  | 79718449 | 79719162 |
| 10 | 79623727 | 79639902 | NM_023431    | chr10 | 79639286 | 79639860 |
| 10 | 79623727 | 79639902 | NM_023431    | chr10 | 79629425 | 79630248 |
| 17 | 79620868 | 79629367 | NM_009994    | chr17 | 79623180 | 79623856 |
| 9  | 79576457 | 79585114 | NM_133718    | chr9  | 79580412 | 79581015 |
| 9  | 79576457 | 79585114 | NM_133718    | chr9  | 79577187 | 79577979 |
| 10 | 79564970 | 79585370 | NM_007909    | chr10 | 79571005 | 79571971 |
| 10 | 79564970 | 79585370 | NM_007909    | chr10 | 79567323 | 79567942 |
| 10 | 79539494 | 79553948 | NM_021565    | chr10 | 79553602 | 79554335 |
| 10 | 79536013 | 79546516 | NM_015761    | chr10 | 79541304 | 79541905 |
| 10 | 79539494 | 79553948 | NM_021565    | chr10 | 79541304 | 79541905 |
| 2  | 79439450 | 79447949 | BC008560     | chr2  | 79442227 | 79442827 |
| 15 | 79429750 | 79438343 | NM_010059    | chr15 | 79432011 | 79432880 |
| 10 | 79379570 | 79393459 | NM_001003949 | chr10 | 79391824 | 79392734 |
| 10 | 79382635 | 79394310 | NM_007725    | chr10 | 79391824 | 79392734 |
| 10 | 79367844 | 79376352 | NM_130455    | chr10 | 79370800 | 79371423 |
| 1  | 79316515 | 79325114 | NM_009129    | chr1  | 79323053 | 79323666 |
| 1  | 79316515 | 79325114 | NM_009129    | chr1  | 79317611 | 79318229 |
| 10 | 79276796 | 79296540 | NM_011178    | chr10 | 79285032 | 79285888 |
| 10 | 79251734 | 79267645 | NM_001077363 | chr10 | 79260708 | 79261320 |
| 10 | 79251734 | 79267645 | NM_001077363 | chr10 | 79256684 | 79257468 |
| 15 | 79227675 | 79236558 | NM_172608    | chr15 | 79229308 | 79230135 |
| 12 | 79139574 | 79148073 | NM_172952    | chr12 | 79146672 | 79147267 |
| 2  | 79050265 | 79058983 | NM_010576    | chr2  | 79050888 | 79051477 |

|    |          |          |              |       |          |          |
|----|----------|----------|--------------|-------|----------|----------|
| 7  | 79020013 | 79028573 | NM_008594    | chr7  | 79022019 | 79022688 |
| 10 | 79014630 | 79023129 | NM_198614    | chr10 | 79016496 | 79017184 |
| 16 | 78971185 | 78979689 | NM_008941    | chr16 | 78972491 | 78973098 |
| 10 | 78951038 | 78964220 | NM_027422    | chr10 | 78952262 | 78952874 |
| 15 | 78849467 | 78860674 | NM_013847    | chr15 | 78855954 | 78856619 |
| 15 | 78849467 | 78860674 | NM_013847    | chr15 | 78855117 | 78855740 |
| 15 | 78804311 | 78812871 | NM_001024716 | chr15 | 78806355 | 78806966 |
| 7  | 78780971 | 78789830 | NM_020583    | chr7  | 78781298 | 78781977 |
| 1  | 78530898 | 78539561 | NM_001001981 | chr1  | 78536399 | 78537137 |
| 11 | 78510206 | 78519568 | NM_008702    | chr11 | 78512377 | 78512984 |
| 10 | 78366727 | 78375226 | NM_147042    | chr10 | 78373080 | 78373965 |
| 6  | 78304218 | 78312768 | NM_011259    | chr6  | 78307944 | 78308585 |
| 6  | 78305855 | 78314374 | NM_013893    | chr6  | 78307944 | 78308585 |
| 10 | 78276303 | 78284802 | NM_207571    | chr10 | 78282627 | 78283224 |
| 9  | 78226070 | 78234921 | NM_173386    | chr9  | 78233732 | 78234327 |
| 9  | 78227895 | 78236407 | NM_026658    | chr9  | 78233732 | 78234327 |
| 15 | 78228359 | 78239793 | NM_138670    | chr15 | 78233232 | 78234091 |
| 15 | 78230603 | 78239120 | NM_009437    | chr15 | 78233232 | 78234091 |
| 16 | 78178283 | 78186862 | NM_001025192 | chr16 | 78184617 | 78185543 |
| 15 | 78147113 | 78155774 | NM_007780    | chr15 | 78148632 | 78149421 |
| 1  | 78077455 | 78086283 | NM_008781    | chr1  | 78085751 | 78086174 |
| 11 | 78071951 | 78080488 | NM_001002004 | chr11 | 78078541 | 78079257 |
| 15 | 77943716 | 77953283 | NM_007583    | chr15 | 77946541 | 77947129 |
| 9  | 77892968 | 77901592 | NM_019987    | chr9  | 77894419 | 77895135 |
| 11 | 77793408 | 77801907 | NM_174852    | chr11 | 77797888 | 77799332 |
| 10 | 77790432 | 77798935 | NM_025349    | chr10 | 77793742 | 77794657 |
| 15 | 77781391 | 77789907 | NM_001017983 | chr15 | 77781635 | 77782053 |
| 12 | 77738811 | 77747356 | NM_134050    | chr12 | 77740026 | 77740887 |
| 5  | 77598098 | 77606688 | NM_027270    | chr5  | 77600655 | 77601271 |
| 13 | 77593098 | 77601600 | BC089469     | chr13 | 77598228 | 77598864 |
| 13 | 77596488 | 77604987 | BC100362     | chr13 | 77598228 | 77598864 |
| 12 | 77475087 | 77483586 | BC030417     | chr12 | 77482292 | 77483065 |
| 1  | 77395652 | 77404236 | NM_007936    | chr1  | 77398603 | 77399325 |
| 11 | 77325312 | 77333811 | NM_026185    | chr11 | 77332393 | 77332929 |
| 11 | 77326969 | 77340793 | NM_001024920 | chr11 | 77332393 | 77332929 |
| 12 | 77317016 | 77325742 | NM_008301    | chr12 | 77324231 | 77325143 |
| 15 | 77298302 | 77306801 | NM_177744    | chr15 | 77302180 | 77302765 |
| 18 | 77296043 | 77304542 | AF039567     | chr18 | 77300080 | 77300699 |
| 12 | 77283106 | 77291941 | NM_178744    | chr12 | 77289588 | 77290184 |
| 12 | 77285340 | 77293839 | NM_028356    | chr12 | 77289588 | 77290184 |
| 12 | 77163057 | 77171586 | NM_019784    | chr12 | 77165658 | 77166488 |
| 12 | 77083825 | 77092324 | U81451       | chr12 | 77090517 | 77090922 |
| 10 | 77019436 | 77027986 | NM_145925    | chr10 | 77025084 | 77025899 |
| 12 | 76954229 | 76962728 | BC082586     | chr12 | 76960419 | 76961402 |
| 10 | 76800954 | 76809453 | AF291049     | chr10 | 76805976 | 76806706 |
| 10 | 76697016 | 76711170 | NM_030262    | chr10 | 76702726 | 76703836 |
| 12 | 76652001 | 76660519 | NM_030750    | chr12 | 76653525 | 76654483 |

|    |          |          |              |       |          |          |
|----|----------|----------|--------------|-------|----------|----------|
| 15 | 76492935 | 76501434 | NM_033371    | chr15 | 76496879 | 76497769 |
| 15 | 76494704 | 76503203 | NM_007989    | chr15 | 76496879 | 76497769 |
| 15 | 76481821 | 76490410 | NM_010630    | chr15 | 76487438 | 76488044 |
| 11 | 76482665 | 76498771 | NM_177709    | chr11 | 76483448 | 76484062 |
| 2  | 76445112 | 76453611 | DQ365828     | chr2  | 76450583 | 76451354 |
| 15 | 76441608 | 76450147 | NM_028064    | chr15 | 76444587 | 76445182 |
| 11 | 76385070 | 76399922 | NM_198895    | chr11 | 76399169 | 76399772 |
| 18 | 76380486 | 76390302 | BC089184     | chr18 | 76380633 | 76381286 |
| 15 | 76363491 | 76371990 | NM_013909    | chr15 | 76369802 | 76370547 |
| 15 | 76336562 | 76345073 | NM_010046    | chr15 | 76338014 | 76338698 |
| 16 | 76283872 | 76292391 | AF147745     | chr16 | 76289534 | 76290226 |
| 11 | 76282145 | 76290649 | BC059064     | chr11 | 76285677 | 76286266 |
| 15 | 76278693 | 76287274 | NM_198885    | chr15 | 76285202 | 76285874 |
| 16 | 76253230 | 76262507 | NM_173440    | chr16 | 76256802 | 76257409 |
| 16 | 76253230 | 76262507 | NM_173440    | chr16 | 76254747 | 76255695 |
| 12 | 76221153 | 76229793 | NM_023275    | chr12 | 76224670 | 76225379 |
| 2  | 76201377 | 76209876 | NM_145525    | chr2  | 76205940 | 76206686 |
| 15 | 76190153 | 76198688 | NM_021555    | chr15 | 76196371 | 76197507 |
| 16 | 76175197 | 76183696 | AF053062     | chr16 | 76177470 | 76178066 |
| 15 | 76148652 | 76181060 | NM_010331    | chr15 | 76155197 | 76155784 |
| 15 | 76054253 | 76064633 | NM_011117    | chr15 | 76056009 | 76056600 |
| 15 | 75730990 | 75739489 | NM_178646    | chr15 | 75736612 | 75737225 |
| 15 | 75734046 | 75742595 | NM_029663    | chr15 | 75736612 | 75737225 |
| 8  | 75651952 | 75660455 | NM_007975    | chr8  | 75653191 | 75653820 |
| 15 | 75572678 | 75581177 | NM_194350    | chr15 | 75575820 | 75576611 |
| 15 | 75503546 | 75512045 | NM_028404    | chr15 | 75503522 | 75504286 |
| 2  | 75454116 | 75462656 | NM_198090    | chr2  | 75460405 | 75461344 |
| 2  | 75454116 | 75462656 | NM_198090    | chr2  | 75454790 | 75455437 |
| 5  | 75428033 | 75440362 | NM_011058    | chr5  | 75435905 | 75436495 |
| 11 | 75413741 | 75422243 | BC086792     | chr11 | 75415829 | 75416414 |
| 1  | 75384329 | 75394789 | NM_178884    | chr1  | 75384461 | 75385052 |
| 10 | 75362785 | 75371312 | NM_011418    | chr10 | 75364919 | 75365526 |
| 3  | 75351425 | 75362004 | NM_026460    | chr3  | 75360047 | 75360654 |
| 11 | 75318789 | 75332235 | NM_001004157 | chr11 | 75329674 | 75330309 |
| 11 | 75318789 | 75332235 | NM_001004157 | chr11 | 75325624 | 75326497 |
| 1  | 75269018 | 75277517 | BC048698     | chr1  | 75273362 | 75274413 |
| 10 | 75263737 | 75272259 | NM_029472    | chr10 | 75271040 | 75271851 |
| 8  | 75242022 | 75250521 | NM_008452    | chr8  | 75248066 | 75248984 |
| 1  | 75237492 | 75245991 | NM_010043    | chr1  | 75242659 | 75243465 |
| 10 | 75205502 | 75214073 | NM_172549    | chr10 | 75210996 | 75211538 |
| 10 | 75205502 | 75214073 | NM_172549    | chr10 | 75208411 | 75208898 |
| 9  | 75192769 | 75201923 | NM_027418    | chr9  | 75197163 | 75197603 |
| 11 | 75158693 | 75167293 | NM_177009    | chr11 | 75164504 | 75165101 |
| 11 | 75162000 | 75170505 | NM_026653    | chr11 | 75164504 | 75165101 |
| 1  | 75113613 | 75122203 | NM_178055    | chr1  | 75118269 | 75118903 |
| 1  | 75088003 | 75096530 | NM_011494    | chr1  | 75093992 | 75094634 |
| 1  | 75090093 | 75108401 | NM_009447    | chr1  | 75093992 | 75094634 |

|    |          |          |              |       |          |          |
|----|----------|----------|--------------|-------|----------|----------|
| 17 | 75077942 | 75086471 | NM_206958    | chr17 | 75080688 | 75081673 |
| 1  | 75072603 | 75081343 | NM_001003917 | chr1  | 75078946 | 75079609 |
| 1  | 75014586 | 75031579 | NM_026977    | chr1  | 75016539 | 75017215 |
| 11 | 74992504 | 75001004 | NM_027136    | chr11 | 74993598 | 74994438 |
| 5  | 74956990 | 74965521 | NM_010727    | chr5  | 74961244 | 74961783 |
| 9  | 74851811 | 74860310 | NM_010864    | chr9  | 74860038 | 74860649 |
| 18 | 74835322 | 74843821 | M55253       | chr18 | 74839155 | 74839819 |
| 13 | 74827503 | 74836007 | NM_001033042 | chr13 | 74828161 | 74828840 |
| 5  | 74810945 | 74819444 | NM_178672    | chr5  | 74815878 | 74816496 |
| 5  | 74811214 | 74819720 | NM_024183    | chr5  | 74815878 | 74816496 |
| 1  | 74718723 | 74727725 | NM_009518    | chr1  | 74724648 | 74725234 |
| 1  | 74718723 | 74727725 | NM_009518    | chr1  | 74721177 | 74721851 |
| 18 | 74561984 | 74570490 | NM_201600    | chr18 | 74569452 | 74570180 |
| 1  | 74515568 | 74525189 | NM_025784    | chr1  | 74521435 | 74522048 |
| 1  | 74518672 | 74527235 | NM_029888    | chr1  | 74521435 | 74522048 |
| 8  | 74485068 | 74501612 | NM_145598    | chr8  | 74499634 | 74500232 |
| 10 | 74472084 | 74483329 | NM_029781    | chr10 | 74480466 | 74481094 |
| 8  | 74463924 | 74472426 | NM_198095    | chr8  | 74465848 | 74466582 |
| 8  | 74465919 | 74474442 | NM_028617    | chr8  | 74465848 | 74466582 |
| 11 | 74459735 | 74468234 | BC072573     | chr11 | 74465391 | 74466350 |
| 12 | 74462727 | 74471233 | NM_178715    | chr12 | 74464153 | 74465045 |
| 1  | 74432458 | 74441965 | NM_021383    | chr1  | 74439363 | 74439961 |
| 18 | 74335583 | 74344248 | NM_028868    | chr18 | 74341969 | 74342621 |
| 8  | 74307874 | 74316941 | NM_010150    | chr8  | 74309922 | 74310750 |
| 8  | 74289931 | 74302841 | NM_029865    | chr8  | 74295569 | 74296738 |
| 1  | 74289315 | 74297814 | NM_001033345 | chr1  | 74295210 | 74296331 |
| 18 | 74187819 | 74196318 | NM_172632    | chr18 | 74190829 | 74191473 |
| 11 | 74148925 | 74157424 | NM_146707    | chr11 | 74148918 | 74149658 |
| 11 | 74098843 | 74107342 | NM_011002    | chr11 | 74101287 | 74101889 |
| 13 | 74086992 | 74095512 | NM_009354    | chr13 | 74088589 | 74089350 |
| 1  | 74081201 | 74089727 | NM_009909    | chr1  | 74082991 | 74083793 |
| X  | 74046180 | 74054679 | NM_016979    | chrX  | 74048227 | 74048878 |
| 11 | 74020985 | 74029484 | NM_146711    | chr11 | 74026085 | 74026677 |
| 11 | 74020985 | 74029484 | NM_146711    | chr11 | 74024680 | 74025391 |
| 14 | 73926223 | 73934722 | D37837       | chr14 | 73930331 | 73930951 |
| 13 | 73927228 | 73940252 | NM_145376    | chr13 | 73927596 | 73928210 |
| 5  | 73830404 | 73838903 | BC031793     | chr5  | 73832031 | 73832678 |
| 8  | 73782075 | 73808486 | NM_032397    | chr8  | 73801971 | 73802572 |
| 11 | 73774725 | 73783224 | NM_146346    | chr11 | 73776866 | 73777455 |
| 11 | 73774725 | 73783224 | NM_146346    | chr11 | 73775256 | 73775920 |
| X  | 73757823 | 73766445 | NM_020601    | chrX  | 73761604 | 73762500 |
| 11 | 73721186 | 73729685 | NM_147005    | chr11 | 73722711 | 73723570 |
| 12 | 73674373 | 73682941 | NM_008910    | chr12 | 73680086 | 73680888 |
| 15 | 73569667 | 73581632 | NM_008975    | chr15 | 73579623 | 73580295 |
| 15 | 73569667 | 73581632 | NM_008975    | chr15 | 73570031 | 73570789 |
| 8  | 73517470 | 73525978 | NM_023627    | chr8  | 73524623 | 73525293 |
| 8  | 73517470 | 73525978 | NM_023627    | chr8  | 73518144 | 73518893 |

|   |    |          |                       |       |          |          |
|---|----|----------|-----------------------|-------|----------|----------|
|   | 14 | 73485006 | 73493505 BC006743     | chr14 | 73488364 | 73488945 |
|   | 8  | 73433235 | 73445356 NM_025577    | chr8  | 73437208 | 73437931 |
|   | 11 | 73412777 | 73421276 NM_207224    | chr11 | 73414349 | 73414954 |
|   | 8  | 73402388 | 73411934 NM_178771    | chr8  | 73406550 | 73407174 |
|   | 11 | 73403432 | 73411931 NM_147023    | chr11 | 73404927 | 73405587 |
|   | 11 | 73330893 | 73339392 NM_146443    | chr11 | 73333953 | 73334513 |
|   | 8  | 73279701 | 73288268 NM_030680    | chr8  | 73279698 | 73280293 |
|   | 11 | 73267906 | 73276405 NM_147025    | chr11 | 73270293 | 73271073 |
|   | 11 | 73239677 | 73256419 NM_147024    | chr11 | 73249672 | 73250334 |
|   | 11 | 73239677 | 73256419 NM_147024    | chr11 | 73241168 | 73241821 |
|   | 2  | 73184716 | 73193237 BC115698     | chr2  | 73186143 | 73186744 |
|   | 3  | 73140370 | 73148869 NM_198864    | chr3  | 73144220 | 73145171 |
|   | 2  | 73066764 | 73075263 NM_001005343 | chr2  | 73071695 | 73072411 |
|   | 11 | 72987278 | 72995777 NM_029564    | chr11 | 72994542 | 72995150 |
|   | 11 | 72990709 | 72999232 NM_025318    | chr11 | 72994542 | 72995150 |
|   | 11 | 72987278 | 72995777 NM_029564    | chr11 | 72993432 | 72994089 |
|   | 11 | 72990709 | 72999232 NM_025318    | chr11 | 72993432 | 72994089 |
|   | 8  | 72922854 | 72931353 NM_145596    | chr8  | 72925277 | 72925859 |
|   | 15 | 72911668 | 72920168 NM_053068    | chr15 | 72916997 | 72918068 |
|   | 9  | 72803176 | 72811675 BC006717     | chr9  | 72810970 | 72811606 |
|   | 14 | 72687242 | 72695762 BC059831     | chr14 | 72692183 | 72692790 |
|   | 5  | 72444795 | 72453318 NM_178599    | chr5  | 72452112 | 72452726 |
|   | 11 | 72417456 | 72426280 NM_025985    | chr11 | 72423777 | 72424492 |
|   | 11 | 72268237 | 72278814 BC025823     | chr11 | 72273728 | 72274803 |
|   | 14 | 72256883 | 72265382 BC060962     | chr14 | 72257310 | 72258282 |
|   | 9  | 72152776 | 72161275 BC027163     | chr9  | 72155170 | 72155815 |
| X |    | 72124759 | 72133258 NM_145629    | chrX  | 72126489 | 72127169 |
|   | 14 | 72100161 | 72108660 AB030204     | chr14 | 72106263 | 72106932 |
|   | 14 | 72057396 | 72065946 NM_009029    | chr14 | 72060250 | 72060861 |
|   | 12 | 72052740 | 72061280 NM_013896    | chr12 | 72055245 | 72055980 |
|   | 8  | 72011755 | 72020272 NM_007509    | chr8  | 72017569 | 72018307 |
|   | 8  | 72015650 | 72024211 NM_153054    | chr8  | 72017569 | 72018307 |
|   | 9  | 71907680 | 71916363 NM_011544    | chr9  | 71913095 | 71913700 |
|   | 4  | 71683913 | 71693223 NM_011599    | chr4  | 71687235 | 71687833 |
|   | 8  | 71661625 | 71670124 NM_172753    | chr8  | 71661638 | 71662357 |
|   | 17 | 71612129 | 71620628 NM_177087    | chr17 | 71619856 | 71620442 |
|   | 1  | 71583852 | 71592380 NM_010233    | chr1  | 71586948 | 71587534 |
|   | 17 | 71450918 | 71463614 AY820307     | chr17 | 71460418 | 71461065 |
|   | 14 | 71442586 | 71451085 NM_207636    | chr14 | 71444438 | 71445531 |
|   | 6  | 71417403 | 71425902 NM_009543    | chr6  | 71423462 | 71424293 |
| X |    | 71342636 | 71351307 NM_001030307 | chrX  | 71348424 | 71349455 |
|   | 6  | 71249243 | 71257742 U76371       | chr6  | 71256434 | 71257258 |
|   | 17 | 71213274 | 71222323 NM_145158    | chr17 | 71217076 | 71217568 |
|   | 17 | 71103533 | 71112032 NM_022882    | chr17 | 71108933 | 71109544 |
|   | 17 | 71082835 | 71091334 AF286723     | chr17 | 71088518 | 71089447 |
|   | 6  | 71071418 | 71079955 NM_178413    | chr6  | 71073908 | 71074522 |
|   | 17 | 70753556 | 70762591 NM_009372    | chr17 | 70754465 | 70755243 |

|   |    |          |                       |       |          |          |
|---|----|----------|-----------------------|-------|----------|----------|
|   | 17 | 70753556 | 70762591 NM_009372    | chr17 | 70753766 | 70754373 |
|   | 6  | 70719078 | 70727754 NM_009075    | chr6  | 70721100 | 70721777 |
|   | 10 | 70628103 | 70639573 NM_009360    | chr10 | 70630429 | 70631016 |
| X |    | 70529470 | 70568289 NM_177234    | chrX  | 70563765 | 70564712 |
| X |    | 70529470 | 70568289 NM_177234    | chrX  | 70560155 | 70560906 |
|   | 11 | 70510756 | 70521494 NM_153103    | chr11 | 70517488 | 70518282 |
|   | 11 | 70513750 | 70522350 NM_213729    | chr11 | 70517488 | 70518282 |
|   | 11 | 70460689 | 70476830 NM_024211    | chr11 | 70468149 | 70468791 |
|   | 11 | 70467399 | 70476490 NM_007933    | chr11 | 70468149 | 70468791 |
|   | 11 | 70449317 | 70466283 NM_010326    | chr11 | 70465019 | 70465646 |
|   | 11 | 70460689 | 70476830 NM_024211    | chr11 | 70465019 | 70465646 |
|   | 11 | 70449317 | 70466283 NM_010326    | chr11 | 70463691 | 70464566 |
|   | 11 | 70460689 | 70476830 NM_024211    | chr11 | 70463691 | 70464566 |
|   | 11 | 70449317 | 70466283 NM_010326    | chr11 | 70461574 | 70462168 |
|   | 11 | 70460689 | 70476830 NM_024211    | chr11 | 70461574 | 70462168 |
|   | 8  | 70413747 | 70432512 NM_010874    | chr8  | 70420652 | 70421319 |
|   | 11 | 70328312 | 70336811 NM_001013607 | chr11 | 70329753 | 70330624 |
|   | 11 | 70329391 | 70344130 NM_146020    | chr11 | 70329753 | 70330624 |
|   | 12 | 70284755 | 70293311 NM_007481    | chr12 | 70291255 | 70291884 |
|   | 11 | 70262126 | 70278316 NM_001029929 | chr11 | 70275708 | 70276300 |
|   | 11 | 70273196 | 70282179 NM_023158    | chr11 | 70275708 | 70276300 |
|   | 11 | 70262126 | 70278316 NM_001029929 | chr11 | 70274781 | 70275376 |
|   | 11 | 70273196 | 70282179 NM_023158    | chr11 | 70274781 | 70275376 |
|   | 7  | 70231483 | 70246259 NM_009697    | chr7  | 70235171 | 70235790 |
|   | 7  | 70232672 | 70246314 BC116191     | chr7  | 70235171 | 70235790 |
|   | 12 | 70209335 | 70217872 NM_027117    | chr12 | 70214877 | 70215620 |
|   | 12 | 70096818 | 70105317 NM_146035    | chr12 | 70102412 | 70103043 |
|   | 12 | 70100131 | 70108645 NM_025589    | chr12 | 70102412 | 70103043 |
|   | 13 | 70073425 | 70087277 NM_145354    | chr13 | 70083187 | 70083812 |
|   | 13 | 70076193 | 70084835 NM_175283    | chr13 | 70083187 | 70083812 |
|   | 11 | 70034467 | 70062041 NM_007528    | chr11 | 70046572 | 70047413 |
|   | 4  | 70018699 | 70027289 NM_172694    | chr4  | 70024340 | 70024695 |
|   | 9  | 70000514 | 70009031 NM_181072    | chr9  | 70008147 | 70008961 |
|   | 3  | 69945304 | 69953825 NM_133675    | chr3  | 69951916 | 69952373 |
|   | 10 | 69942343 | 69950842 BC003231     | chr10 | 69946712 | 69947331 |
|   | 11 | 69801559 | 69819404 NM_007888    | chr11 | 69816511 | 69817462 |
|   | 11 | 69801559 | 69819404 NM_007888    | chr11 | 69814079 | 69814830 |
|   | 1  | 69754186 | 69762695 NM_029160    | chr1  | 69758811 | 69759419 |
|   | 1  | 69754186 | 69762695 NM_029160    | chr1  | 69757624 | 69758258 |
|   | 18 | 69712795 | 69721342 U16321       | chr18 | 69713494 | 69714080 |
|   | 11 | 69648720 | 69665589 NM_023564    | chr11 | 69662485 | 69663102 |
|   | 11 | 69632136 | 69657044 NM_198862    | chr11 | 69654257 | 69654939 |
|   | 11 | 69648720 | 69665589 NM_023564    | chr11 | 69654257 | 69654939 |
|   | 8  | 69620411 | 69635336 NM_010934    | chr8  | 69626089 | 69626693 |
|   | 11 | 69609639 | 69627819 NM_009601    | chr11 | 69620873 | 69621514 |
|   | 5  | 69617996 | 69626844 NM_175519    | chr5  | 69619140 | 69619959 |
| X |    | 69513675 | 69524110 NM_011727    | chrX  | 69516044 | 69517172 |



|   |    |          |          |              |       |          |          |
|---|----|----------|----------|--------------|-------|----------|----------|
|   | 11 | 69495398 | 69507749 | NM_030702    | chr11 | 69501686 | 69502617 |
| X |    | 69493241 | 69501740 | NM_183094    | chrX  | 69495218 | 69495966 |
|   | 11 | 69476338 | 69494510 | NM_144958    | chr11 | 69481678 | 69482570 |
|   | 2  | 69442093 | 69450593 | NM_028284    | chr2  | 69449580 | 69450184 |
| X |    | 69438936 | 69447441 | BC064787     | chrX  | 69444902 | 69446104 |
| X |    | 69399671 | 69408170 | NM_001025384 | chrX  | 69403321 | 69403923 |
| X |    | 69399671 | 69408170 | NM_001025384 | chrX  | 69400650 | 69401551 |
|   | 11 | 69373551 | 69382373 | NM_007911    | chr11 | 69375045 | 69375892 |
| X |    | 69363767 | 69378335 | NM_001025383 | chrX  | 69370308 | 69371388 |
| X |    | 69367923 | 69376422 | NM_001045539 | chrX  | 69370308 | 69371388 |
| X |    | 69363767 | 69378335 | NM_001025383 | chrX  | 69368163 | 69368618 |
| X |    | 69367923 | 69376422 | NM_001045539 | chrX  | 69368163 | 69368618 |
| X |    | 69332699 | 69341198 | BC098242     | chrX  | 69334702 | 69335337 |
|   | 14 | 69252769 | 69265156 | NM_009755    | chr14 | 69256933 | 69257525 |
|   | 11 | 69205986 | 69220207 | NM_030083    | chr11 | 69216593 | 69217220 |
|   | 11 | 69209042 | 69220429 | NM_025915    | chr11 | 69216593 | 69217220 |
|   | 14 | 69186597 | 69195096 | NM_145981    | chr14 | 69193908 | 69194558 |
|   | 11 | 69159580 | 69172123 | BC030435     | chr11 | 69162045 | 69162913 |
|   | 3  | 69130090 | 69138596 | NM_025863    | chr3  | 69132371 | 69132998 |
|   | 11 | 68930648 | 68945072 | NM_011786    | chr11 | 68936266 | 68936943 |
|   | 11 | 68930648 | 68945072 | NM_011786    | chr11 | 68934660 | 68935750 |
|   | 10 | 68923065 | 68932064 | NM_146005    | chr10 | 68930715 | 68931481 |
|   | 11 | 68909129 | 68919216 | NM_011065    | chr11 | 68911853 | 68912442 |
| X |    | 68906265 | 68914906 | NM_008067    | chrX  | 68907841 | 68908451 |
|   | 15 | 68752089 | 68760842 | NM_010158    | chr15 | 68757129 | 68757892 |
|   | 7  | 68620202 | 68628751 | NM_001042592 | chr7  | 68622525 | 68623558 |
|   | 10 | 68597909 | 68610532 | BC099973     | chr10 | 68607147 | 68607765 |
|   | 7  | 68485969 | 68494468 | NM_001013781 | chr7  | 68489366 | 68489969 |
|   | 9  | 68446966 | 68455465 | NM_013646    | chr9  | 68452656 | 68453262 |
|   | 12 | 68423326 | 68431837 | BC090990     | chr12 | 68424989 | 68425580 |
|   | 14 | 68338148 | 68347055 | NM_033325    | chr14 | 68344543 | 68345109 |
|   | 13 | 68303349 | 68315435 | NM_198322    | chr13 | 68309288 | 68309895 |
|   | 11 | 68199832 | 68209021 | NM_008744    | chr11 | 68200653 | 68201661 |
|   | 17 | 68172772 | 68181271 | NM_177278    | chr17 | 68174794 | 68175379 |
|   | 18 | 67894183 | 67902792 | NM_001039088 | chr18 | 67900272 | 67900942 |
|   | 18 | 67760968 | 67769488 | NM_134138    | chr18 | 67766247 | 67767121 |
|   | 18 | 67764087 | 67772586 | BC119216     | chr18 | 67766247 | 67767121 |
|   | 18 | 67760968 | 67769488 | NM_134138    | chr18 | 67762377 | 67763022 |
|   | 17 | 67596210 | 67604731 | NM_008480    | chr17 | 67603087 | 67603758 |
|   | 5  | 67533787 | 67542485 | NM_028975    | chr5  | 67541943 | 67542422 |
|   | 5  | 67533787 | 67542485 | NM_028975    | chr5  | 67539785 | 67540475 |
|   | 5  | 67533787 | 67542485 | NM_028975    | chr5  | 67538734 | 67539326 |
|   | 18 | 67510088 | 67518599 | NM_026473    | chr18 | 67515189 | 67516133 |
|   | 10 | 67430758 | 67439257 | AY036116     | chr10 | 67434062 | 67435108 |
|   | 13 | 67366280 | 67374816 | NM_025547    | chr13 | 67373530 | 67374146 |
|   | 6  | 67303216 | 67311715 | NM_008354    | chr6  | 67304380 | 67304990 |
|   | 6  | 67190557 | 67199105 | NM_025814    | chr6  | 67196662 | 67197580 |

|    |          |          |              |       |          |          |
|----|----------|----------|--------------|-------|----------|----------|
| 11 | 67087319 | 67095818 | NM_177369    | chr11 | 67092050 | 67092881 |
| 14 | 67031214 | 67039788 | NM_010910    | chr14 | 67033634 | 67034739 |
| 11 | 67010297 | 67018808 | NM_030679    | chr11 | 67011259 | 67011856 |
| 9  | 66845831 | 66854406 | NM_024427    | chr9  | 66848213 | 66848861 |
| 9  | 66716332 | 66724831 | NM_173413    | chr9  | 66716891 | 66717495 |
| 15 | 66658999 | 66667498 | NM_001029841 | chr15 | 66661921 | 66662512 |
| 9  | 66592068 | 66600599 | NM_177583    | chr9  | 66594416 | 66595276 |
| 6  | 66539647 | 66548146 | NM_134169    | chr6  | 66547466 | 66548096 |
| 15 | 66388148 | 66396715 | NM_172514    | chr15 | 66390104 | 66390951 |
| 3  | 66382249 | 66390766 | NM_145820    | chr3  | 66388232 | 66388815 |
| 3  | 66382249 | 66390766 | NM_145820    | chr3  | 66385002 | 66385617 |
| 3  | 66301816 | 66310338 | NM_008987    | chr3  | 66308594 | 66309190 |
| 14 | 66181402 | 66191721 | NM_010095    | chr14 | 66190857 | 66191670 |
| 14 | 66181402 | 66191721 | NM_010095    | chr14 | 66187541 | 66188139 |
| 5  | 66136036 | 66144535 | BC094937     | chr5  | 66140391 | 66141179 |
| 3  | 66043591 | 66052154 | NM_019937    | chr3  | 66045262 | 66045907 |
| 12 | 65988211 | 65996710 | NM_178912    | chr12 | 65992108 | 65992839 |
| 12 | 65990033 | 65998545 | NM_013902    | chr12 | 65992108 | 65992839 |
| 8  | 65837638 | 65846165 | NM_023689    | chr8  | 65840589 | 65841198 |
| 14 | 65816960 | 65825463 | NM_001034881 | chr14 | 65820375 | 65821245 |
| 14 | 65820211 | 65828710 | NM_009955    | chr14 | 65820375 | 65821245 |
| 18 | 65744672 | 65753171 | BC046409     | chr18 | 65751651 | 65752338 |
| 18 | 65699599 | 65710394 | NM_207255    | chr18 | 65705244 | 65706348 |
| 17 | 65676963 | 65685462 | BC029761     | chr17 | 65682116 | 65682720 |
| 17 | 65669725 | 65678224 | NM_133685    | chr17 | 65671338 | 65671979 |
| 11 | 65617370 | 65626657 | NM_026107    | chr11 | 65622679 | 65623462 |
| 17 | 65550342 | 65558841 | BC004852     | chr17 | 65552554 | 65553147 |
| 5  | 65501431 | 65509930 | BC046432     | chr5  | 65505871 | 65506444 |
| 9  | 65468589 | 65477098 | NM_010952    | chr9  | 65476215 | 65476800 |
| 5  | 65404366 | 65413305 | NM_175174    | chr5  | 65404385 | 65404893 |
| 14 | 65302462 | 65310961 | AF105222     | chr14 | 65304188 | 65304891 |
| 5  | 65232218 | 65245170 | NM_011604    | chr5  | 65244618 | 65245230 |
| 5  | 65243209 | 65251746 | NM_026667    | chr5  | 65244618 | 65245230 |
| 9  | 65190517 | 65199042 | NM_001033158 | chr9  | 65191654 | 65192318 |
| 13 | 65125236 | 65133735 | NM_133680    | chr13 | 65130925 | 65131659 |
| 1  | 65107146 | 65119390 | NM_010497    | chr1  | 65109497 | 65110089 |
| 5  | 65085474 | 65098369 | DQ981866     | chr5  | 65089443 | 65090254 |
| 5  | 65076658 | 65085190 | NM_008453    | chr5  | 65082085 | 65083063 |
| X  | 64933220 | 64941864 | NM_008031    | chrX  | 64939652 | 64940316 |
| 14 | 64889922 | 64898421 | BC051636     | chr14 | 64891681 | 64892288 |
| 14 | 64753949 | 64762520 | NM_023209    | chr14 | 64759184 | 64759791 |
| 7  | 64749416 | 64757990 | NM_023239    | chr7  | 64751113 | 64751712 |
| 9  | 64747114 | 64755613 | NM_144813    | chr9  | 64749122 | 64749814 |
| 1  | 64669060 | 64678026 | NM_022721    | chr1  | 64671749 | 64672736 |
| 18 | 64639374 | 64647906 | NM_027350    | chr18 | 64641672 | 64642168 |
| 14 | 64544663 | 64553185 | NM_028811    | chr14 | 64544776 | 64545369 |
| 17 | 64491940 | 64500439 | NM_008549    | chr17 | 64498285 | 64498994 |

|    |          |          |              |       |          |          |
|----|----------|----------|--------------|-------|----------|----------|
| 13 | 64381398 | 64391037 | NM_009984    | chr13 | 64385526 | 64386180 |
| 13 | 64281590 | 64290140 | NM_172587    | chr13 | 64284051 | 64284882 |
| 8  | 64110313 | 64118913 | NM_021506    | chr8  | 64115396 | 64116007 |
| 1  | 64053057 | 64061694 | NM_033563    | chr1  | 64056718 | 64057383 |
| 9  | 63909153 | 63922111 | NM_145835    | chr9  | 63912268 | 63912954 |
| 13 | 63875677 | 63884176 | NM_001013608 | chr13 | 63881741 | 63882380 |
| 8  | 63872943 | 63881442 | NM_007711    | chr8  | 63875672 | 63876666 |
| 8  | 63844375 | 63852912 | NM_173876    | chr8  | 63848753 | 63849527 |
| 7  | 63815308 | 63823865 | NM_021366    | chr7  | 63815495 | 63816383 |
| 9  | 63553210 | 63562000 | NM_016769    | chr9  | 63555147 | 63555800 |
| 4  | 63504578 | 63513087 | NM_011607    | chr4  | 63507896 | 63508493 |
| 4  | 63460215 | 63468714 | NM_001001494 | chr4  | 63465657 | 63466260 |
| 9  | 63394661 | 63403188 | NM_025857    | chr9  | 63400314 | 63401045 |
| 1  | 63108419 | 63119620 | NM_145518    | chr1  | 63117541 | 63118136 |
| 1  | 63105405 | 63113940 | NM_018796    | chr1  | 63110700 | 63111289 |
| 1  | 63108419 | 63119620 | NM_145518    | chr1  | 63110700 | 63111289 |
| 18 | 63072459 | 63080958 | AB023957     | chr18 | 63076958 | 63077609 |
| 9  | 62942487 | 62951017 | NM_172446    | chr9  | 62946659 | 62947217 |
| 14 | 62891816 | 62900315 | NM_011446    | chr14 | 62896549 | 62897517 |
| 4  | 62882102 | 62895723 | NM_001045514 | chr4  | 62891189 | 62892093 |
| 11 | 62871854 | 62880353 | NM_027660    | chr11 | 62873017 | 62873610 |
| 11 | 62761388 | 62769920 | NM_025496    | chr11 | 62764876 | 62765477 |
| 18 | 62719134 | 62727633 | NM_001001803 | chr18 | 62724609 | 62725210 |
| 4  | 62638004 | 62646516 | NM_007443    | chr4  | 62643314 | 62643924 |
| 9  | 62630793 | 62639292 | NM_001033175 | chr9  | 62637920 | 62638442 |
| 1  | 62631593 | 62640480 | NM_001077403 | chr1  | 62637328 | 62637912 |
| 11 | 62597462 | 62611612 | NM_138949    | chr11 | 62605350 | 62606027 |
| 11 | 62597462 | 62611612 | NM_138949    | chr11 | 62602880 | 62603534 |
| 17 | 62564107 | 62572779 | NM_207654    | chr17 | 62566168 | 62566794 |
| 14 | 62384565 | 62393064 | NM_177628    | chr14 | 62384241 | 62384832 |
| 14 | 62192787 | 62205381 | NM_008092    | chr14 | 62203977 | 62204565 |
| 14 | 62192787 | 62205381 | NM_008092    | chr14 | 62202267 | 62203213 |
| 14 | 62192787 | 62205381 | NM_008092    | chr14 | 62194923 | 62195581 |
| 4  | 62180105 | 62188604 | AF215669     | chr4  | 62186879 | 62187809 |
| 9  | 62133434 | 62141989 | NM_009672    | chr9  | 62140890 | 62141941 |
| 14 | 62129404 | 62137903 | NM_010191    | chr14 | 62131026 | 62131817 |
| 4  | 61841110 | 61849623 | NM_175090    | chr4  | 61846936 | 61847586 |
| 8  | 61797897 | 61806396 | NM_173411    | chr8  | 61798744 | 61799343 |
| 11 | 61743922 | 61758747 | NM_019921    | chr11 | 61748459 | 61749040 |
| 11 | 61729065 | 61737620 | BC054105     | chr11 | 61736336 | 61736946 |
| 10 | 61733400 | 61741899 | J05277       | chr10 | 61736277 | 61736914 |
| 9  | 61710045 | 61718548 | U29402       | chr9  | 61712302 | 61713039 |
| 9  | 61710045 | 61718548 | U29402       | chr9  | 61710201 | 61710798 |
| 11 | 61668313 | 61677268 | NM_013881    | chr11 | 61670596 | 61671591 |
| 10 | 61624025 | 61632583 | NM_197996    | chr10 | 61626334 | 61626974 |
| 10 | 61460379 | 61468911 | BC087556     | chr10 | 61466818 | 61467471 |
| 4  | 61319042 | 61327541 | NM_008649    | chr4  | 61323529 | 61324116 |

|   |    |          |          |              |       |          |          |
|---|----|----------|----------|--------------|-------|----------|----------|
|   | 18 | 61299867 | 61308419 | NM_134134    | chr18 | 61303440 | 61304021 |
|   | 13 | 61262448 | 61270971 | NM_019541    | chr13 | 61263702 | 61264303 |
|   | 9  | 61164864 | 61174177 | NM_009389    | chr9  | 61166533 | 61167277 |
|   | 18 | 61158918 | 61167568 | NM_009880    | chr18 | 61161200 | 61161837 |
|   | 4  | 61003341 | 61011840 | BC037152     | chr4  | 61006565 | 61007160 |
|   | 13 | 60943675 | 60957558 | NM_009411    | chr13 | 60951492 | 60952009 |
|   | 13 | 60943675 | 60957558 | NM_009411    | chr13 | 60946512 | 60947178 |
|   | 18 | 60836259 | 60844758 | NM_008306    | chr18 | 60842122 | 60842749 |
|   | 2  | 60761532 | 60774952 | NM_020296    | chr2  | 60764040 | 60764666 |
|   | 18 | 60680137 | 60688656 | NM_025776    | chr18 | 60686000 | 60686591 |
|   | 13 | 60605570 | 60614333 | NM_029653    | chr13 | 60611397 | 60612450 |
|   | 14 | 60547650 | 60564277 | NM_206974    | chr14 | 60554646 | 60555242 |
|   | 11 | 60538593 | 60547203 | NM_001009927 | chr11 | 60545225 | 60545978 |
|   | 11 | 60540898 | 60549416 | NM_022009    | chr11 | 60545225 | 60545978 |
| X |    | 60535027 | 60543661 | NM_178740    | chrX  | 60536333 | 60537088 |
|   | 19 | 60520400 | 60528967 | NM_201615    | chr19 | 60525347 | 60525948 |
| X |    | 60428221 | 60436726 | NM_027512    | chrX  | 60433842 | 60434486 |
|   | 8  | 60377500 | 60386004 | NM_021788    | chr8  | 60379276 | 60379926 |
|   | 2  | 60351601 | 60360117 | NM_008867    | chr2  | 60353198 | 60353809 |
|   | 11 | 60348173 | 60356770 | NM_172943    | chr11 | 60352518 | 60353581 |
|   | 19 | 60278660 | 60287360 | NM_029648    | chr19 | 60285168 | 60285783 |
|   | 4  | 60231412 | 60239951 | NM_008647    | chr4  | 60234625 | 60235220 |
|   | 11 | 60227498 | 60236137 | NM_025757    | chr11 | 60233610 | 60234418 |
|   | 11 | 60230701 | 60239200 | NM_145427    | chr11 | 60233610 | 60234418 |
|   | 10 | 60224325 | 60232938 | NM_029770    | chr10 | 60229970 | 60230759 |
|   | 11 | 60166567 | 60175100 | NM_001039092 | chr11 | 60173563 | 60174245 |
|   | 11 | 60163520 | 60172074 | NM_029044    | chr11 | 60163560 | 60164158 |
|   | 14 | 60086567 | 60095066 | NM_172809    | chr14 | 60091274 | 60092016 |
|   | 4  | 59873890 | 59883909 | NM_001013577 | chr4  | 59883095 | 59883825 |
|   | 1  | 59702825 | 59711682 | NM_007561    | chr1  | 59710014 | 59710643 |
|   | 10 | 59667070 | 59675569 | NM_011179    | chr10 | 59673482 | 59674229 |
|   | 10 | 59667070 | 59675569 | NM_011179    | chr10 | 59672687 | 59673288 |
|   | 10 | 59581565 | 59595596 | NM_016803    | chr10 | 59589398 | 59590462 |
|   | 15 | 59472335 | 59481251 | NM_144549    | chr15 | 59476206 | 59476907 |
|   | 1  | 59420725 | 59429641 | NM_008057    | chr1  | 59426030 | 59426610 |
|   | 2  | 59406883 | 59415382 | NM_198294    | chr2  | 59412908 | 59413635 |
|   | 19 | 59396531 | 59405030 | NM_001033222 | chr19 | 59402011 | 59402396 |
|   | 10 | 59392196 | 59400695 | NM_026937    | chr10 | 59398481 | 59399067 |
|   | 9  | 59370343 | 59378842 | NM_175235    | chr9  | 59372735 | 59373175 |
|   | 9  | 59331673 | 59340203 | NM_010421    | chr9  | 59338488 | 59339252 |
|   | 11 | 59319608 | 59328416 | NM_172941    | chr11 | 59320048 | 59320650 |
|   | 10 | 59268948 | 59277474 | NM_019965    | chr10 | 59275252 | 59275867 |
|   | 11 | 59260255 | 59268815 | NM_178659    | chr11 | 59265564 | 59266169 |
|   | 16 | 59224252 | 59232751 | NM_146995    | chr16 | 59225889 | 59226562 |
|   | 12 | 59123816 | 59132315 | NM_009216    | chr12 | 59124906 | 59125501 |
|   | 1  | 58912117 | 58920849 | NM_172656    | chr1  | 58914994 | 58915568 |
|   | 15 | 58909573 | 58918106 | NM_144800    | chr15 | 58911018 | 58911809 |

|    |          |          |              |       |          |          |
|----|----------|----------|--------------|-------|----------|----------|
| 19 | 58845165 | 58853664 | NM_026208    | chr19 | 58852618 | 58853530 |
| 8  | 58796588 | 58805090 | NM_175939    | chr8  | 58804577 | 58805060 |
| 16 | 58737669 | 58746168 | NM_147000    | chr16 | 58742058 | 58742651 |
| 18 | 58675609 | 58684125 | BC115435     | chr18 | 58681629 | 58682638 |
| 1  | 58650054 | 58660362 | NM_207653    | chr1  | 58655847 | 58656464 |
| 10 | 58614319 | 58623204 | NM_001024911 | chr10 | 58616038 | 58616761 |
| 6  | 58520249 | 58528749 | NM_011920    | chr6  | 58527660 | 58528670 |
| 19 | 58505217 | 58514609 | NM_010279    | chr19 | 58508583 | 58509327 |
| 19 | 58505217 | 58514609 | NM_010279    | chr19 | 58505889 | 58506737 |
| 13 | 58405891 | 58414830 | NM_028904    | chr13 | 58411669 | 58412792 |
| 13 | 58409230 | 58418966 | NM_025279    | chr13 | 58411669 | 58412792 |
| 13 | 58405891 | 58414830 | NM_028904    | chr13 | 58407176 | 58407792 |
| 2  | 58380044 | 58388543 | L15436       | chr2  | 58381277 | 58381972 |
| 6  | 58362924 | 58371423 | NM_134177    | chr6  | 58364786 | 58365407 |
| 9  | 58280740 | 58290244 | NM_176921    | chr9  | 58286946 | 58287555 |
| 13 | 58222716 | 58231259 | NM_152234    | chr13 | 58224939 | 58225721 |
| 6  | 58187999 | 58196498 | NM_134180    | chr6  | 58194985 | 58195646 |
| 1  | 58148943 | 58157515 | NM_023631    | chr1  | 58153556 | 58154170 |
| 15 | 58042410 | 58051009 | NM_026346    | chr15 | 58049926 | 58050539 |
| 15 | 58042410 | 58051009 | NM_026346    | chr15 | 58047345 | 58047693 |
| 11 | 57997954 | 58006453 | DQ508487     | chr11 | 58003868 | 58004459 |
| 1  | 57968515 | 57977049 | NM_009676    | chr1  | 57968522 | 57969137 |
| 9  | 57954145 | 57963279 | NM_012043    | chr9  | 57955487 | 57956267 |
| 4  | 57942213 | 57951113 | NM_001035533 | chr4  | 57943710 | 57944543 |
| 13 | 57915399 | 57923898 | NM_009262    | chr13 | 57920868 | 57921475 |
| 6  | 57906381 | 57914880 | NM_053238    | chr6  | 57912832 | 57913495 |
| 6  | 57883610 | 57892109 | NM_134173    | chr6  | 57890465 | 57891354 |
| 6  | 57883610 | 57892109 | NM_134173    | chr6  | 57887561 | 57887948 |
| 6  | 57853870 | 57862369 | NM_134179    | chr6  | 57855508 | 57856127 |
| 10 | 57836209 | 57844708 | NM_011240    | chr10 | 57842282 | 57842892 |
| 10 | 57644883 | 57653400 | NM_027375    | chr10 | 57650389 | 57651284 |
| 10 | 57616384 | 57638017 | NM_001034869 | chr10 | 57632069 | 57632679 |
| 10 | 57616384 | 57638017 | NM_001034869 | chr10 | 57626047 | 57627519 |
| 10 | 57616384 | 57638017 | NM_001034869 | chr10 | 57623260 | 57624004 |
| 12 | 57607651 | 57616210 | NM_011041    | chr12 | 57614031 | 57614657 |
| 12 | 57607651 | 57616210 | NM_011041    | chr12 | 57612844 | 57613831 |
| 19 | 57500178 | 57508683 | NM_028115    | chr19 | 57505551 | 57506380 |
| 10 | 57476959 | 57485458 | NM_020561    | chr10 | 57482170 | 57482809 |
| 9  | 57353091 | 57361626 | NM_022813    | chr9  | 57358746 | 57359329 |
| 10 | 57314396 | 57323009 | NM_008863    | chr10 | 57316366 | 57316984 |
| 4  | 57235203 | 57243702 | AB032366     | chr4  | 57238646 | 57239225 |
| X  | 57151371 | 57159870 | NM_009237    | chrX  | 57155031 | 57155943 |
| 6  | 57133436 | 57141935 | NM_053235    | chr6  | 57139183 | 57139776 |
| 6  | 57060931 | 57069430 | NM_053233    | chr6  | 57067469 | 57068159 |
| 9  | 57058091 | 57066736 | NM_028820    | chr9  | 57060507 | 57061114 |
| 2  | 57047683 | 57056373 | NM_010274    | chr2  | 57053107 | 57053968 |
| 16 | 56993804 | 57002303 | NM_183281    | chr16 | 56995844 | 56996592 |

|   |    |          |                       |       |          |          |
|---|----|----------|-----------------------|-------|----------|----------|
|   | 6  | 56959491 | 56967990 NM_134187    | chr6  | 56961373 | 56961973 |
|   | 14 | 56950866 | 56959372 NM_028643    | chr14 | 56955307 | 56955910 |
|   | 14 | 56950866 | 56959372 NM_028643    | chr14 | 56952726 | 56953533 |
|   | 2  | 56936807 | 56945527 AB014889     | chr2  | 56939480 | 56940090 |
|   | 17 | 56928788 | 56937334 NM_134125    | chr17 | 56934707 | 56935479 |
|   | 6  | 56880091 | 56888590 NM_134176    | chr6  | 56886270 | 56887294 |
|   | 19 | 56869214 | 56886897 NM_001002241 | chr19 | 56880367 | 56881023 |
|   | 19 | 56869214 | 56886897 NM_001002241 | chr19 | 56879154 | 56879759 |
|   | 19 | 56864434 | 56872933 NM_170757    | chr19 | 56872820 | 56873431 |
|   | 19 | 56869214 | 56886897 NM_001002241 | chr19 | 56872820 | 56873431 |
|   | 9  | 56787105 | 56796148 NM_019651    | chr9  | 56794084 | 56794729 |
|   | 19 | 56769622 | 56778121 NM_007419    | chr19 | 56774382 | 56775014 |
| X |    | 56748076 | 56756596 NM_001037863 | chrX  | 56750873 | 56751953 |
| X |    | 56748076 | 56756596 NM_001037863 | chrX  | 56749428 | 56750181 |
|   | 17 | 56742507 | 56751010 NM_025877    | chr17 | 56746264 | 56746942 |
|   | 12 | 56736798 | 56745297 NM_019994    | chr12 | 56738087 | 56738732 |
|   | 16 | 56718310 | 56726809 NM_172825    | chr16 | 56725611 | 56726297 |
|   | 9  | 56722683 | 56732508 NM_175483    | chr9  | 56723502 | 56724191 |
|   | 6  | 56707388 | 56715887 NM_145958    | chr6  | 56708218 | 56709038 |
|   | 14 | 56697688 | 56706233 NM_015771    | chr14 | 56699388 | 56700347 |
|   | 9  | 56657297 | 56665796 NM_139001    | chr9  | 56665043 | 56665637 |
|   | 13 | 56605325 | 56621730 NM_009369    | chr13 | 56618921 | 56619637 |
|   | 19 | 56595511 | 56604066 NM_025811    | chr19 | 56601437 | 56602075 |
|   | 19 | 56597906 | 56607472 NM_018831    | chr19 | 56601437 | 56602075 |
|   | 19 | 56595511 | 56604066 NM_025811    | chr19 | 56598388 | 56598967 |
|   | 19 | 56597906 | 56607472 NM_018831    | chr19 | 56598388 | 56598967 |
|   | 19 | 56595511 | 56604066 NM_025811    | chr19 | 56597578 | 56598260 |
|   | 19 | 56597906 | 56607472 NM_018831    | chr19 | 56597578 | 56598260 |
|   | 1  | 56579489 | 56587996 NM_027661    | chr1  | 56586966 | 56587643 |
|   | 1  | 56579489 | 56587996 NM_027661    | chr1  | 56580617 | 56581311 |
|   | 19 | 56526937 | 56535436 BC051054     | chr19 | 56531203 | 56531816 |
|   | 19 | 56508890 | 56517408 NM_172641    | chr19 | 56511112 | 56511800 |
|   | 17 | 56395251 | 56408101 NM_178926    | chr17 | 56402712 | 56403318 |
|   | 17 | 56396905 | 56405406 BC059729     | chr17 | 56402712 | 56403318 |
|   | 17 | 56395251 | 56408101 NM_178926    | chr17 | 56397325 | 56397918 |
|   | 17 | 56396905 | 56405406 BC059729     | chr17 | 56397325 | 56397918 |
|   | 17 | 56352381 | 56360880 NM_027933    | chr17 | 56358577 | 56359167 |
|   | 17 | 56309524 | 56318023 NM_028782    | chr17 | 56312329 | 56312928 |
|   | 17 | 56292334 | 56300890 NM_153152    | chr17 | 56298727 | 56299329 |
|   | 13 | 56259286 | 56267785 NM_010896    | chr13 | 56261721 | 56262328 |
|   | 17 | 56143625 | 56152191 NM_011483    | chr17 | 56145980 | 56146630 |
|   | 17 | 56107578 | 56116147 NM_011218    | chr17 | 56111074 | 56111676 |
|   | 8  | 56026161 | 56034680 BC054817     | chr8  | 56027898 | 56028600 |
|   | 17 | 55919087 | 55930220 NM_025836    | chr17 | 55923357 | 55924120 |
|   | 7  | 55912272 | 55920907 NM_010418    | chr7  | 55918125 | 55918974 |
|   | 17 | 55790274 | 55798781 NM_025566    | chr17 | 55790479 | 55791105 |
|   | 16 | 55744574 | 55753089 BC058188     | chr16 | 55746864 | 55747802 |

|   |    |          |                       |       |          |          |
|---|----|----------|-----------------------|-------|----------|----------|
|   | 16 | 55744574 | 55753089 BC058188     | chr16 | 55745972 | 55746590 |
|   | 7  | 55733875 | 55742374 NM_011370    | chr7  | 55741194 | 55741873 |
|   | 17 | 55700597 | 55721239 NM_020568    | chr17 | 55702583 | 55703187 |
|   | 13 | 55626627 | 55647172 NM_145975    | chr13 | 55641232 | 55641889 |
|   | 13 | 55626627 | 55647172 NM_145975    | chr13 | 55634124 | 55634911 |
|   | 13 | 55596765 | 55612232 NM_146045    | chr13 | 55611489 | 55612091 |
|   | 13 | 55577092 | 55586742 NM_145382    | chr13 | 55579841 | 55580518 |
|   | 13 | 55556536 | 55565082 BC021381     | chr13 | 55558437 | 55559024 |
|   | 1  | 55387086 | 55395591 BC085310     | chr1  | 55389029 | 55389629 |
|   | 1  | 55387086 | 55395591 BC085310     | chr1  | 55388112 | 55388759 |
|   | 11 | 55302055 | 55310561 NM_009720    | chr11 | 55306081 | 55306887 |
|   | 17 | 55303220 | 55311719 NM_028370    | chr17 | 55303894 | 55304513 |
|   | 3  | 55263973 | 55272477 NM_028937    | chr3  | 55270130 | 55270775 |
|   | 16 | 55205658 | 55214188 NM_178720    | chr16 | 55206784 | 55207378 |
|   | 18 | 55112783 | 55123960 NM_175751    | chr18 | 55116471 | 55117056 |
|   | 18 | 55112783 | 55123960 NM_175751    | chr18 | 55114904 | 55115487 |
|   | 1  | 55023828 | 55038390 NM_010477    | chr1  | 55035539 | 55035993 |
|   | 14 | 54990194 | 54998711 NM_008571    | chr14 | 54998212 | 54998664 |
|   | 14 | 54962889 | 54971422 U93242       | chr14 | 54971170 | 54971777 |
|   | 14 | 54966035 | 54974543 NM_008570    | chr14 | 54971170 | 54971777 |
|   | 6  | 54961579 | 54970097 NM_180678    | chr6  | 54967907 | 54968506 |
|   | 9  | 54941515 | 54950199 NM_180600    | chr9  | 54948017 | 54948614 |
|   | 14 | 54851783 | 54860295 BC087941     | chr14 | 54853512 | 54854182 |
|   | 14 | 54833040 | 54841552 NM_027143    | chr14 | 54838844 | 54839540 |
|   | 3  | 54817468 | 54825967 NM_025442    | chr3  | 54820079 | 54820809 |
|   | 3  | 54817468 | 54825967 NM_025442    | chr3  | 54818472 | 54819066 |
|   | 14 | 54772971 | 54781578 NM_023699    | chr14 | 54777194 | 54777809 |
|   | 13 | 54700959 | 54709469 NM_134064    | chr13 | 54704062 | 54704691 |
|   | 13 | 54700959 | 54709469 NM_134064    | chr13 | 54703111 | 54703721 |
|   | 13 | 54593853 | 54602366 NM_025933    | chr13 | 54599103 | 54599869 |
|   | 13 | 54597173 | 54605696 NM_178605    | chr13 | 54599103 | 54599869 |
|   | 3  | 54563352 | 54571857 BC023828     | chr3  | 54565922 | 54566532 |
|   | 14 | 54536802 | 54551172 NM_011190    | chr14 | 54541746 | 54542624 |
|   | 14 | 54539861 | 54548360 NM_194346    | chr14 | 54541746 | 54542624 |
|   | 6  | 54493437 | 54501960 NM_027268    | chr6  | 54499817 | 54500457 |
|   | 14 | 54426868 | 54435493 NM_001037938 | chr14 | 54434793 | 54435432 |
|   | 15 | 54395568 | 54404071 NM_178920    | chr15 | 54400619 | 54401265 |
| X |    | 54371412 | 54379926 NM_009575    | chrX  | 54378284 | 54379114 |
| X |    | 54371412 | 54379926 NM_009575    | chrX  | 54374215 | 54374973 |
|   | 6  | 54196399 | 54204898 NM_023543    | chr6  | 54200425 | 54201025 |
|   | 14 | 54057700 | 54066620 NM_007455    | chr14 | 54065549 | 54066183 |
|   | 13 | 54062780 | 54071279 NM_010076    | chr13 | 54064523 | 54065448 |
|   | 19 | 53950728 | 53963259 D86344       | chr19 | 53961527 | 53962196 |
|   | 19 | 53950728 | 53963259 D86344       | chr19 | 53955780 | 53956377 |
|   | 18 | 53807351 | 53815850 BC048590     | chr18 | 53812179 | 53812823 |
|   | 17 | 53770731 | 53780985 NM_022025    | chr17 | 53776311 | 53777031 |
|   | 6  | 53747773 | 53756272 NM_025817    | chr6  | 53750289 | 53750900 |

|   |    |          |                       |       |          |          |
|---|----|----------|-----------------------|-------|----------|----------|
|   | 6  | 53747773 | 53756272 NM_025817    | chr6  | 53749154 | 53749754 |
|   | 3  | 53742785 | 53751284 NM_172862    | chr3  | 53744375 | 53744987 |
|   | 3  | 53742785 | 53751284 NM_172862    | chr3  | 53742925 | 53743512 |
|   | 4  | 53729098 | 53743604 NM_139309    | chr4  | 53734840 | 53735668 |
|   | 6  | 53496952 | 53505451 NM_172728    | chr6  | 53499735 | 53500322 |
|   | 10 | 53316355 | 53324854 NM_027830    | chr10 | 53321674 | 53322586 |
|   | 13 | 53291144 | 53299643 NM_013846    | chr13 | 53295982 | 53296566 |
|   | 1  | 53239042 | 53247541 NM_153556    | chr1  | 53244354 | 53245109 |
|   | 19 | 53187853 | 53199808 NM_013758    | chr19 | 53196199 | 53197022 |
| X |    | 53163222 | 53175110 NM_177293    | chrX  | 53168332 | 53168925 |
|   | 11 | 53141105 | 53149902 NM_008300    | chr11 | 53144077 | 53144701 |
|   | 5  | 53116383 | 53124899 NM_024213    | chr5  | 53123257 | 53123891 |
| X |    | 53095128 | 53103627 U41739       | chrX  | 53098869 | 53099530 |
|   | 9  | 53058065 | 53066577 NM_176846    | chr9  | 53063088 | 53063709 |
|   | 10 | 53020108 | 53028621 NM_023129    | chr10 | 53021204 | 53021953 |
|   | 2  | 53008120 | 53016619 NM_022989    | chr2  | 53013587 | 53014552 |
|   | 13 | 52990816 | 52999471 NM_017373    | chr13 | 52997948 | 52998561 |
|   | 4  | 52985723 | 52994228 NM_146607    | chr4  | 52988400 | 52989013 |
|   | 13 | 52974665 | 52987346 BC100384     | chr13 | 52981063 | 52981667 |
| X |    | 52942204 | 52950730 NM_146234    | chrX  | 52943890 | 52944747 |
|   | 4  | 52930393 | 52938892 NM_146839    | chr4  | 52931845 | 52932427 |
|   | 4  | 52875173 | 52883672 NM_146824    | chr4  | 52877510 | 52878127 |
|   | 4  | 52836588 | 52848998 NM_146858    | chr4  | 52846962 | 52847592 |
|   | 18 | 52813048 | 52821566 NM_010293    | chr18 | 52820434 | 52821036 |
|   | 18 | 52813048 | 52821566 NM_010293    | chr18 | 52819369 | 52819988 |
|   | 1  | 52651206 | 52659705 NM_133829    | chr1  | 52653021 | 52653811 |
|   | 14 | 52635715 | 52644214 U07659       | chr14 | 52639095 | 52639693 |
|   | 14 | 52618007 | 52626506 NM_177288    | chr14 | 52621004 | 52621787 |
|   | 11 | 52602129 | 52610628 NM_177059    | chr11 | 52607721 | 52608534 |
|   | 18 | 52450905 | 52459452 NM_026286    | chr18 | 52453248 | 52453984 |
|   | 6  | 52128026 | 52170522 NM_008263    | chr6  | 52158887 | 52159480 |
|   | 6  | 52128026 | 52170522 NM_008263    | chr6  | 52146621 | 52147230 |
|   | 6  | 52085370 | 52100414 NM_010449    | chr6  | 52093874 | 52094515 |
|   | 6  | 52089257 | 52100592 BC094279     | chr6  | 52093874 | 52094515 |
|   | 6  | 52085370 | 52100414 NM_010449    | chr6  | 52092567 | 52093858 |
|   | 6  | 52089257 | 52100592 BC094279     | chr6  | 52092567 | 52093858 |
|   | 11 | 52069432 | 52077993 NM_011543    | chr11 | 52075348 | 52075959 |
|   | 17 | 52061692 | 52070191 NM_001031811 | chr17 | 52066305 | 52066990 |
|   | 10 | 51916034 | 51924563 NM_025705    | chr10 | 51920941 | 51921536 |
|   | 9  | 51820244 | 51828743 NM_001001500 | chr9  | 51824986 | 51825490 |
|   | 10 | 51704946 | 51713600 NM_153786    | chr10 | 51712968 | 51713572 |
|   | 11 | 51698405 | 51706904 NM_199299    | chr11 | 51698767 | 51699352 |
|   | 13 | 51651821 | 51666712 NM_029279    | chr13 | 51657246 | 51658300 |
|   | 9  | 51511717 | 51520216 NM_175535    | chr9  | 51517980 | 51518622 |
|   | 11 | 51447759 | 51456304 NM_010448    | chr11 | 51449700 | 51450594 |
|   | 14 | 51410498 | 51418997 NM_020512    | chr14 | 51412088 | 51412680 |
|   | 10 | 51360225 | 51376432 NM_177306    | chr10 | 51363994 | 51364608 |



|    |          |          |              |       |          |          |
|----|----------|----------|--------------|-------|----------|----------|
| 14 | 51330379 | 51338878 | NM_146431    | chr14 | 51334797 | 51335402 |
| 1  | 51227671 | 51236327 | NM_138741    | chr1  | 51230649 | 51231416 |
| 10 | 51163073 | 51171593 | NM_008147    | chr10 | 51166298 | 51167358 |
| 14 | 51116653 | 51125152 | NM_033618    | chr14 | 51119732 | 51120343 |
| 11 | 51110874 | 51119373 | BC002220     | chr11 | 51115888 | 51116512 |
| 14 | 50929492 | 50948684 | NM_027248    | chr14 | 50940731 | 50941384 |
| 14 | 50932816 | 50941315 | NM_001033805 | chr14 | 50940731 | 50941384 |
| 14 | 50929492 | 50948684 | NM_027248    | chr14 | 50939879 | 50940459 |
| 14 | 50932816 | 50941315 | NM_001033805 | chr14 | 50939879 | 50940459 |
| 9  | 50851809 | 50861875 | NM_177702    | chr9  | 50857680 | 50858617 |
| 11 | 50822126 | 50830625 | NM_146911    | chr11 | 50828171 | 50828792 |
| 14 | 50800793 | 50809292 | NM_001029990 | chr14 | 50806629 | 50807269 |
| 14 | 50636584 | 50645083 | NM_001034102 | chr14 | 50639051 | 50640232 |
| 9  | 50603165 | 50611673 | NM_001034085 | chr9  | 50609404 | 50610100 |
| 10 | 50578066 | 50586772 | NM_011376    | chr10 | 50580846 | 50581535 |
| 9  | 50514468 | 50530059 | NM_133981    | chr9  | 50522178 | 50522661 |
| 9  | 50517857 | 50526382 | NM_023483    | chr9  | 50522178 | 50522661 |
| 9  | 50514468 | 50530059 | NM_133981    | chr9  | 50520142 | 50521287 |
| 9  | 50517857 | 50526382 | NM_023483    | chr9  | 50520142 | 50521287 |
| 9  | 50514468 | 50530059 | NM_133981    | chr9  | 50517129 | 50517733 |
| 6  | 50493561 | 50509848 | NM_007808    | chr6  | 50505687 | 50506318 |
| 13 | 50473804 | 50482303 | NM_001033400 | chr13 | 50481145 | 50481824 |
| 7  | 50461209 | 50469708 | NM_172901    | chr7  | 50463882 | 50464639 |
| 9  | 50409232 | 50418010 | NM_145614    | chr9  | 50416426 | 50417010 |
| 16 | 50349189 | 50357737 | NM_027444    | chr16 | 50354041 | 50354645 |
| 12 | 50253134 | 50262909 | NM_008241    | chr12 | 50262146 | 50262753 |
| 18 | 50247531 | 50256168 | NM_008292    | chr18 | 50249112 | 50249759 |
| 11 | 50133217 | 50141739 | AY442299     | chr11 | 50141294 | 50141718 |
| 18 | 50081972 | 50090471 | BC020141     | chr18 | 50087372 | 50087986 |
| 18 | 49952327 | 49960826 | AY590892     | chr18 | 49959961 | 49960581 |
| 16 | 49769280 | 49777856 | NM_010581    | chr16 | 49773481 | 49773995 |
| 17 | 49756583 | 49765203 | NM_010021    | chr17 | 49758043 | 49758638 |
| 4  | 49700584 | 49709117 | NM_001004025 | chr4  | 49703381 | 49704064 |
| 4  | 49616316 | 49624903 | NM_025944    | chr4  | 49619549 | 49619935 |
| 13 | 49588684 | 49597211 | NM_012050    | chr13 | 49590876 | 49591352 |
| 14 | 49558234 | 49566733 | NM_146299    | chr14 | 49564144 | 49564751 |
| 4  | 49469710 | 49478212 | DQ469311     | chr4  | 49473186 | 49473863 |
| 2  | 49435323 | 49443822 | NM_008449    | chr2  | 49442026 | 49442599 |
| 11 | 49372610 | 49381109 | NM_001011790 | chr11 | 49375902 | 49376506 |
| 14 | 49329497 | 49337996 | NM_146420    | chr14 | 49333286 | 49333872 |
| 11 | 49307576 | 49316075 | NM_001011741 | chr11 | 49310872 | 49311479 |
| 11 | 49267850 | 49276349 | NM_147066    | chr11 | 49274709 | 49275369 |
| 6  | 49242939 | 49251490 | NM_175098    | chr6  | 49248537 | 49249295 |
|    | 49226705 | 49235328 | NM_013556    | chrX  | 49233255 | 49233856 |
| 14 | 49201723 | 49210222 | NM_146665    | chr14 | 49205723 | 49206330 |
| 11 | 49164836 | 49173335 | NM_146468    | chr11 | 49172262 | 49172942 |
| 4  | 49074562 | 49083085 | NM_178756    | chr4  | 49080616 | 49081508 |

|   |    |          |                       |       |          |          |
|---|----|----------|-----------------------|-------|----------|----------|
|   | 11 | 48985682 | 48994181 NM_146877    | chr11 | 48993167 | 48993749 |
|   | 14 | 48848994 | 48857493 NM_001011530 | chr14 | 48849365 | 48849972 |
|   | 11 | 48674894 | 48683393 NM_053166    | chr11 | 48677074 | 48677742 |
|   | 6  | 48662633 | 48678381 NM_175035    | chr6  | 48671296 | 48671914 |
|   | 11 | 48663563 | 48672062 AF396656     | chr11 | 48668774 | 48669368 |
|   | 11 | 48667432 | 48676035 NM_013812    | chr11 | 48668774 | 48669368 |
|   | 11 | 48650054 | 48666776 BC020156     | chr11 | 48650201 | 48650803 |
|   | 2  | 48630166 | 48639210 NM_007396    | chr2  | 48637427 | 48638264 |
|   | 4  | 48487525 | 48497163 BC006867     | chr4  | 48488735 | 48489629 |
| X |    | 48407051 | 48415879 NM_008150    | chrX  | 48409502 | 48410606 |
|   | 8  | 48232590 | 48241107 NM_008391    | chr8  | 48239876 | 48240513 |
|   | 16 | 48223896 | 48232598 NM_028615    | chr16 | 48230992 | 48231608 |
| X |    | 48213175 | 48223399 BC109337     | chrX  | 48216874 | 48217885 |
|   | 8  | 48113518 | 48122017 NM_001001184 | chr8  | 48116508 | 48117548 |
|   | 6  | 47876987 | 47885597 NM_178898    | chr6  | 47879618 | 47880231 |
|   | 17 | 47869647 | 47878890 NM_207219    | chr17 | 47873250 | 47874174 |
|   | 17 | 47872776 | 47881332 NM_010913    | chr17 | 47873250 | 47874174 |
|   | 8  | 47790440 | 47799488 NM_173789    | chr8  | 47791708 | 47792522 |
|   | 19 | 47587832 | 47596372 NM_175360    | chr19 | 47590543 | 47591621 |
|   | 14 | 47582324 | 47595457 NM_144841    | chr14 | 47584088 | 47584878 |
|   | 19 | 47515059 | 47523720 NM_008018    | chr19 | 47516697 | 47517461 |
|   | 8  | 47496166 | 47504667 NM_001039562 | chr8  | 47499162 | 47499792 |
|   | 4  | 47489761 | 47498300 NM_024171    | chr4  | 47490660 | 47491228 |
| X |    | 47447960 | 47456617 NM_134163    | chrX  | 47450596 | 47451370 |
|   | 6  | 47377910 | 47386520 NM_012042    | chr6  | 47383380 | 47384321 |
|   | 14 | 47362527 | 47371026 NM_172600    | chr14 | 47367998 | 47368636 |
|   | 9  | 47275168 | 47283854 NM_207675    | chr9  | 47278040 | 47278658 |
| X |    | 47080063 | 47088562 NM_133729    | chrX  | 47086584 | 47087502 |
|   | 13 | 47023292 | 47031792 NM_175340    | chr13 | 47024600 | 47025279 |
|   | 18 | 46969370 | 46977878 BC113158     | chr18 | 46974416 | 46975168 |
|   | 17 | 46962979 | 46971478 NM_022015    | chr17 | 46964528 | 46965169 |
|   | 8  | 46905017 | 46915394 NM_126166    | chr8  | 46913445 | 46914052 |
|   | 19 | 46904211 | 46912710 BC052513     | chr19 | 46906782 | 46907370 |
|   | 18 | 46861248 | 46869774 NM_009681    | chr18 | 46866448 | 46867558 |
|   | 18 | 46864389 | 46872888 NM_026217    | chr18 | 46866448 | 46867558 |
|   | 7  | 46794947 | 46803446 BC004639     | chr7  | 46794979 | 46795560 |
|   | 4  | 46668800 | 46677299 NM_198664    | chr4  | 46670912 | 46671498 |
|   | 7  | 46654714 | 46669923 NM_001005247 | chr7  | 46658627 | 46659313 |
|   | 7  | 46658145 | 46667212 NM_008186    | chr7  | 46658627 | 46659313 |
|   | 13 | 46507060 | 46515618 NM_026056    | chr13 | 46512913 | 46513628 |
|   | 4  | 46466199 | 46474726 NM_130889    | chr4  | 46473074 | 46473903 |
|   | 19 | 46444229 | 46452768 NM_015752    | chr19 | 46448807 | 46449459 |
|   | 19 | 46446538 | 46455052 NM_016860    | chr19 | 46448807 | 46449459 |
|   | 19 | 46444229 | 46452768 NM_015752    | chr19 | 46447837 | 46448424 |
|   | 19 | 46446538 | 46455052 NM_016860    | chr19 | 46447837 | 46448424 |
|   | 19 | 46389436 | 46397935 NM_024192    | chr19 | 46392138 | 46393076 |
|   | 4  | 46359294 | 46367793 NM_183298    | chr4  | 46365562 | 46366428 |

|    |          |          |              |       |          |          |
|----|----------|----------|--------------|-------|----------|----------|
| 11 | 46292358 | 46300895 | NM_134250    | chr11 | 46298322 | 46298937 |
| 7  | 46293767 | 46302266 | BC100546     | chr7  | 46297522 | 46298119 |
| 4  | 46214889 | 46223411 | NM_011728    | chr4  | 46220624 | 46221263 |
| 19 | 46199137 | 46207636 | NM_008852    | chr19 | 46201465 | 46202116 |
| 19 | 46199869 | 46208373 | NM_178930    | chr19 | 46201465 | 46202116 |
| 17 | 46134947 | 46150095 | NM_027910    | chr17 | 46145878 | 46146529 |
| 17 | 46138300 | 46147306 | NM_010787    | chr17 | 46145878 | 46146529 |
| 17 | 46134947 | 46150095 | NM_027910    | chr17 | 46144665 | 46145265 |
| 17 | 46138300 | 46147306 | NM_010787    | chr17 | 46144665 | 46145265 |
| 19 | 46123174 | 46131823 | NM_001039352 | chr19 | 46129047 | 46129652 |
| 19 | 46090031 | 46104225 | NM_010697    | chr19 | 46098309 | 46099155 |
| 16 | 46071885 | 46080384 | BC015304     | chr16 | 46076157 | 46076821 |
| 11 | 46072980 | 46083568 | NM_177075    | chr11 | 46074527 | 46075170 |
| 14 | 45984881 | 45993380 | BC049740     | chr14 | 45985825 | 45986439 |
| 11 | 45965327 | 45973826 | AB096093     | chr11 | 45965368 | 45966144 |
| 4  | 45845416 | 45853915 | NM_018741    | chr4  | 45850690 | 45851286 |
| 4  | 45806022 | 45822717 | NM_028270    | chr4  | 45815248 | 45815842 |
| 17 | 45744094 | 45752594 | NM_028751    | chr17 | 45746588 | 45747181 |
| 16 | 45742934 | 45751433 | BC060683     | chr16 | 45745306 | 45745898 |
| 9  | 45684383 | 45692893 | NM_011526    | chr9  | 45689790 | 45690378 |
| 17 | 45663707 | 45672211 | NM_030715    | chr17 | 45666084 | 45666924 |
| 7  | 45645989 | 45655921 | NM_001005511 | chr7  | 45654349 | 45654945 |
| 7  | 45650010 | 45658509 | NM_001033792 | chr7  | 45654349 | 45654945 |
| 9  | 45651564 | 45662050 | NM_008794    | chr9  | 45653722 | 45654066 |
| 9  | 45653418 | 45663882 | NM_178709    | chr9  | 45653722 | 45654066 |
| 17 | 45618652 | 45627216 | NM_019581    | chr17 | 45623937 | 45624538 |
| 7  | 45608026 | 45616525 | AF478566     | chr7  | 45610065 | 45610766 |
| 13 | 45512429 | 45520981 | NM_025508    | chr13 | 45518813 | 45519895 |
| 3  | 45468806 | 45477868 | NM_011043    | chr3  | 45476477 | 45477495 |
| 3  | 45468806 | 45477868 | NM_011043    | chr3  | 45473446 | 45474302 |
| 16 | 45409802 | 45418301 | NM_001005854 | chr16 | 45413393 | 45414043 |
| 7  | 45388372 | 45400534 | NM_148927    | chr7  | 45390938 | 45391846 |
| 7  | 45391756 | 45400255 | NM_008654    | chr7  | 45390938 | 45391846 |
| 7  | 45268002 | 45291487 | NM_010596    | chr7  | 45281453 | 45282103 |
| 7  | 45232469 | 45244625 | NM_029741    | chr7  | 45238033 | 45238643 |
| 19 | 45198026 | 45206525 | NM_021901    | chr19 | 45199856 | 45200498 |
| 16 | 45137669 | 45146168 | NM_001037719 | chr16 | 45144200 | 45144795 |
| 19 | 45053869 | 45077200 | NM_153796    | chr19 | 45070153 | 45071278 |
| 19 | 45053869 | 45077200 | NM_153796    | chr19 | 45059123 | 45059802 |
| 19 | 45057245 | 45065753 | NM_053164    | chr19 | 45059123 | 45059802 |
| 17 | 45053406 | 45071648 | NM_022880    | chr17 | 45053603 | 45054584 |
| 7  | 45043224 | 45051723 | NM_053256    | chr7  | 45046125 | 45046975 |
| 7  | 45016396 | 45040099 | NM_182993    | chr7  | 45037827 | 45038428 |
| 4  | 44996504 | 45005036 | NM_080289    | chr4  | 44998298 | 44998911 |
| 7  | 44968635 | 44977797 | NM_010189    | chr7  | 44971900 | 44972516 |
| X  | 44933631 | 44942205 | NM_173376    | chrX  | 44940670 | 44941641 |
| X  | 44916606 | 44925105 | NM_181751    | chrX  | 44918122 | 44918758 |

|   |    |          |          |              |       |          |          |
|---|----|----------|----------|--------------|-------|----------|----------|
|   | 17 | 44894603 | 44903318 | NM_152810    | chr17 | 44895301 | 44895908 |
|   | 7  | 44859702 | 44868490 | NM_016849    | chr7  | 44867504 | 44868162 |
|   | 7  | 44863122 | 44872754 | NM_029410    | chr7  | 44867504 | 44868162 |
|   | 7  | 44859702 | 44868490 | NM_016849    | chr7  | 44866548 | 44867275 |
|   | 7  | 44863122 | 44872754 | NM_029410    | chr7  | 44866548 | 44867275 |
| X |    | 44833889 | 44845038 | NM_153532    | chrX  | 44838921 | 44839502 |
|   | 9  | 44824178 | 44837440 | NM_001005421 | chr9  | 44836724 | 44837394 |
|   | 19 | 44804705 | 44813204 | NM_011037    | chr19 | 44809214 | 44810199 |
| X |    | 44755517 | 44764053 | NM_012019    | chrX  | 44757334 | 44758193 |
| X |    | 44758097 | 44766663 | NM_011228    | chrX  | 44757334 | 44758193 |
|   | 7  | 44711269 | 44727885 | NM_026270    | chr7  | 44721755 | 44722343 |
|   | 7  | 44714622 | 44723121 | NM_001042655 | chr7  | 44721755 | 44722343 |
| X |    | 44666475 | 44674983 | NM_019680    | chrX  | 44669013 | 44669834 |
| X |    | 44495535 | 44504036 | NM_028276    | chrX  | 44501843 | 44502527 |
|   | 16 | 44414042 | 44422541 | BC056138     | chr16 | 44415727 | 44416078 |
|   | 19 | 44341399 | 44349911 | NM_009128    | chr19 | 44342387 | 44342805 |
|   | 7  | 44327477 | 44338692 | NM_026690    | chr7  | 44336115 | 44336843 |
|   | 5  | 44266793 | 44276010 | NM_008009    | chr5  | 44267519 | 44268367 |
|   | 9  | 44244131 | 44262370 | NM_030256    | chr9  | 44260941 | 44261931 |
|   | 9  | 44244131 | 44262370 | NM_030256    | chr9  | 44257361 | 44258183 |
|   | 9  | 44244131 | 44262370 | NM_030256    | chr9  | 44246135 | 44246712 |
|   | 9  | 44222919 | 44236607 | BC082304     | chr9  | 44230055 | 44231001 |
| X |    | 44198916 | 44207415 | BC054840     | chrX  | 44202057 | 44202643 |
|   | 17 | 44197204 | 44205703 | D14636       | chr17 | 44199383 | 44200684 |
|   | 17 | 44197204 | 44205703 | D14636       | chr17 | 44197669 | 44198262 |
|   | 4  | 44186053 | 44195439 | NM_001038993 | chr4  | 44188044 | 44188835 |
|   | 4  | 44186053 | 44195439 | NM_001038993 | chr4  | 44186630 | 44187224 |
|   | 9  | 44166499 | 44175016 | NM_201372    | chr9  | 44169391 | 44170135 |
|   | 7  | 44060272 | 44068771 | NM_008693    | chr7  | 44061718 | 44062307 |
|   | 16 | 44053141 | 44061887 | NM_028108    | chr16 | 44058356 | 44059302 |
|   | 16 | 44055830 | 44064351 | NM_007508    | chr16 | 44058356 | 44059302 |
|   | 9  | 44051085 | 44062629 | NM_172162    | chr9  | 44056359 | 44057056 |
|   | 1  | 44044390 | 44052969 | BC119032     | chr1  | 44045928 | 44046944 |
|   | 9  | 44016894 | 44025393 | NM_178420    | chr9  | 44017561 | 44018161 |
|   | 10 | 43950773 | 43959406 | NM_053069    | chr10 | 43956474 | 43957151 |
|   | 5  | 43944692 | 43953193 | NM_172274    | chr5  | 43950043 | 43950676 |
|   | 18 | 43915710 | 43924209 | NM_001033280 | chr18 | 43917161 | 43917806 |
|   | 4  | 43890630 | 43899199 | NM_016678    | chr4  | 43896323 | 43897312 |
|   | 1  | 43872548 | 43881113 | NM_009418    | chr1  | 43877141 | 43877784 |
|   | 18 | 43860028 | 43868528 | NM_009258    | chr18 | 43860769 | 43861355 |
|   | 7  | 43838103 | 43846623 | NM_010116    | chr7  | 43842634 | 43843225 |
|   | 9  | 43812016 | 43822945 | NM_198092    | chr9  | 43819921 | 43820567 |
|   | 16 | 43806477 | 43815008 | NM_029128    | chr16 | 43811005 | 43811725 |
|   | 4  | 43789610 | 43798109 | NM_019476    | chr4  | 43792230 | 43792826 |
|   | 4  | 43742298 | 43753633 | NM_027789    | chr4  | 43745996 | 43746616 |
|   | 4  | 43687453 | 43695959 | NM_175517    | chr4  | 43688022 | 43688772 |
|   | 1  | 43669239 | 43677738 | NM_024283    | chr1  | 43676092 | 43676694 |

|    |          |          |              |       |          |          |
|----|----------|----------|--------------|-------|----------|----------|
| 19 | 43659636 | 43668135 | NM_008699    | chr19 | 43660637 | 43661434 |
| 17 | 43645627 | 43654141 | NM_172621    | chr17 | 43647556 | 43648140 |
| 19 | 43575305 | 43583820 | NM_010324    | chr19 | 43581012 | 43581693 |
| 4  | 43577734 | 43586277 | NM_013497    | chr4  | 43577369 | 43578059 |
| 17 | 43535924 | 43544461 | NM_032003    | chr17 | 43542144 | 43542829 |
| 7  | 43534073 | 43542572 | NM_145582    | chr7  | 43539970 | 43540573 |
| 4  | 43511481 | 43526730 | NM_001013377 | chr4  | 43522287 | 43522835 |
| 4  | 43522107 | 43530632 | NM_139305    | chr4  | 43522287 | 43522835 |
| 7  | 43496781 | 43505280 | NM_028236    | chr7  | 43503562 | 43504097 |
| 4  | 43457039 | 43465876 | NM_011571    | chr4  | 43464318 | 43464933 |
| 1  | 43384297 | 43392796 | NM_010879    | chr1  | 43391621 | 43392380 |
| 7  | 43371359 | 43379858 | NM_028737    | chr7  | 43374800 | 43375426 |
| 7  | 43292008 | 43314544 | NM_177693    | chr7  | 43310272 | 43311267 |
| 17 | 43258906 | 43269564 | NM_207649    | chr17 | 43262271 | 43262886 |
| 17 | 43258906 | 43269564 | NM_207649    | chr17 | 43259314 | 43259964 |
| 6  | 43159185 | 43167684 | NM_146370    | chr6  | 43160214 | 43160811 |
| 4  | 43044357 | 43073303 | NM_020035    | chr4  | 43066251 | 43066859 |
| 4  | 43044357 | 43073303 | NM_020035    | chr4  | 43054300 | 43055285 |
| 15 | 42997735 | 43006892 | NM_172815    | chr15 | 43006110 | 43006667 |
| 15 | 42997735 | 43006892 | NM_172815    | chr15 | 43004156 | 43004607 |
| 9  | 42865066 | 42873565 | NM_001034863 | chr9  | 42867067 | 42867740 |
| 1  | 42833922 | 42842421 | BC022587     | chr1  | 42840900 | 42841498 |
| 14 | 42830936 | 42839435 | U72672       | chr14 | 42836028 | 42836682 |
| 6  | 42761490 | 42769989 | NM_147064    | chr6  | 42766420 | 42767049 |
| 6  | 42741080 | 42749579 | NM_146445    | chr6  | 42742685 | 42743145 |
| 6  | 42685661 | 42694160 | NM_146986    | chr6  | 42692000 | 42692671 |
| 6  | 42524480 | 42532979 | NM_203396    | chr6  | 42526673 | 42527321 |
| 17 | 42474039 | 42482589 | NM_178589    | chr17 | 42480534 | 42481164 |
| 10 | 42443911 | 42452657 | NM_153055    | chr10 | 42450198 | 42451067 |
| 10 | 42443911 | 42452657 | NM_153055    | chr10 | 42449149 | 42449752 |
| 6  | 42399308 | 42407807 | NM_146987    | chr6  | 42403496 | 42404171 |
| 18 | 42395351 | 42403850 | AY461716     | chr18 | 42400824 | 42401688 |
| 18 | 42385545 | 42394100 | BC052715     | chr18 | 42387947 | 42388755 |
| 18 | 42353501 | 42362000 | BC006060     | chr18 | 42361158 | 42361788 |
| 6  | 42300340 | 42308875 | NM_023580    | chr6  | 42308428 | 42308860 |
| 10 | 42269504 | 42278047 | NM_152229    | chr10 | 42273223 | 42274411 |
| 6  | 42251700 | 42260199 | NM_029528    | chr6  | 42252931 | 42253535 |
| 7  | 42218734 | 42227233 | NM_027702    | chr7  | 42224942 | 42225449 |
| 18 | 42173640 | 42182182 | NM_172966    | chr18 | 42178510 | 42179121 |
| 8  | 42167911 | 42180674 | NM_010086    | chr8  | 42174771 | 42175363 |
| 10 | 42164330 | 42172830 | NM_145743    | chr10 | 42166726 | 42167439 |
| 9  | 42148425 | 42156924 | NM_009347    | chr9  | 42155469 | 42156109 |
| 19 | 42129945 | 42145755 | NM_198108    | chr19 | 42131471 | 42132420 |
| 6  | 42064543 | 42073042 | NM_181275    | chr6  | 42070465 | 42071109 |
| 5  | 42049969 | 42058748 | NM_007524    | chr5  | 42056455 | 42057085 |
| 19 | 42029074 | 42037573 | NM_145500    | chr19 | 42035849 | 42036545 |
| 19 | 42031942 | 42040447 | NM_028152    | chr19 | 42035849 | 42036545 |

|    |          |          |              |       |          |          |
|----|----------|----------|--------------|-------|----------|----------|
| 9  | 42012696 | 42021251 | NM_172769    | chr9  | 42014666 | 42015256 |
| 4  | 41979785 | 41988284 | BC051472     | chr4  | 41986754 | 41987408 |
| 19 | 41959182 | 41967770 | NM_023418    | chr19 | 41960445 | 41961048 |
| 4  | 41909303 | 41924863 | NM_001017362 | chr4  | 41911474 | 41912078 |
| 19 | 41898907 | 41907443 | NM_177603    | chr19 | 41900501 | 41901259 |
| 4  | 41899677 | 41908182 | NM_027278    | chr4  | 41900202 | 41900798 |
| 4  | 41881585 | 41891712 | NM_016673    | chr4  | 41887694 | 41888368 |
| 4  | 41881585 | 41891712 | NM_016673    | chr4  | 41886022 | 41886679 |
| 3  | 41833213 | 41843732 | NM_028667    | chr3  | 41842822 | 41843433 |
| 3  | 41836531 | 41845030 | BC060271     | chr3  | 41842822 | 41843433 |
| 3  | 41833213 | 41843732 | NM_028667    | chr3  | 41838573 | 41839553 |
| 3  | 41836531 | 41845030 | BC060271     | chr3  | 41838573 | 41839553 |
| 19 | 41794477 | 41803167 | NM_015748    | chr19 | 41794956 | 41795868 |
| 4  | 41689229 | 41702435 | NM_028624    | chr4  | 41693671 | 41694378 |
| 3  | 41646281 | 41662509 | BC020316     | chr3  | 41661007 | 41661815 |
| 6  | 41631397 | 41639905 | NM_032540    | chr6  | 41634862 | 41635247 |
| 6  | 41607831 | 41616376 | NM_001007572 | chr6  | 41612415 | 41614030 |
| 6  | 41461824 | 41475330 | BC034887     | chr6  | 41470093 | 41470838 |
| 6  | 41445394 | 41453894 | NM_009430    | chr6  | 41452769 | 41453387 |
| 4  | 41318687 | 41327191 | NM_026275    | chr4  | 41325142 | 41325835 |
| 7  | 41270071 | 41279043 | NM_177764    | chr7  | 41272916 | 41273498 |
| 6  | 40970947 | 40980469 | M16122       | chr6  | 40978239 | 40978855 |
| 4  | 40961938 | 40970444 | NM_025498    | chr4  | 40963712 | 40964519 |
| 12 | 40950476 | 40958975 | NM_172803    | chr12 | 40954837 | 40955442 |
| 12 | 40953693 | 40962203 | NM_172575    | chr12 | 40954837 | 40955442 |
| 19 | 40878590 | 40887118 | NM_172839    | chr19 | 40884451 | 40885254 |
| 19 | 40878590 | 40887118 | NM_172839    | chr19 | 40878701 | 40879502 |
| 13 | 40864742 | 40873605 | NM_023887    | chr13 | 40865223 | 40865878 |
| 6  | 40814602 | 40823101 | NM_139296    | chr6  | 40821650 | 40822286 |
| 13 | 40742273 | 40751894 | NM_011547    | chr13 | 40745387 | 40746139 |
| 10 | 40569034 | 40577533 | BC061220     | chr10 | 40575830 | 40576474 |
| 9  | 40546342 | 40554841 | NM_031165    | chr9  | 40552335 | 40553121 |
| 12 | 40544670 | 40554410 | NM_001039515 | chr12 | 40547521 | 40548230 |
| 15 | 40479116 | 40488088 | NM_011766    | chr15 | 40485326 | 40486257 |
| 1  | 40263176 | 40271675 | NM_133193    | chr1  | 40267354 | 40267968 |
| 19 | 40136995 | 40145498 | NM_134144    | chr19 | 40144370 | 40144971 |
| 19 | 40136995 | 40145498 | NM_134144    | chr19 | 40143700 | 40144312 |
| 6  | 40033860 | 40042359 | NM_001004182 | chr6  | 40040002 | 40040602 |
| 10 | 40032724 | 40041252 | NM_198164    | chr10 | 40037979 | 40038672 |
| 10 | 39989103 | 39997602 | D12780       | chr10 | 39991921 | 39992654 |
| 10 | 39989103 | 39997602 | D12780       | chr10 | 39990067 | 39990666 |
| 9  | 39931650 | 39945458 | NM_030713    | chr9  | 39942855 | 39943460 |
| 5  | 39930343 | 39938842 | BC009133     | chr5  | 39936946 | 39937633 |
| 18 | 39893471 | 39901991 | NM_011033    | chr18 | 39897196 | 39897794 |
| 9  | 39876031 | 39884530 | NM_146855    | chr9  | 39880253 | 39880903 |
| 1  | 39839716 | 39848215 | NM_008696    | chr1  | 39847227 | 39848094 |
| 19 | 39791866 | 39800365 | NM_001039555 | chr19 | 39792986 | 39793585 |

|    |          |          |              |       |          |          |
|----|----------|----------|--------------|-------|----------|----------|
| 9  | 39749322 | 39763600 | NM_147108    | chr9  | 39757775 | 39758707 |
| 9  | 39450839 | 39459338 | NM_207138    | chr9  | 39454365 | 39454909 |
| 6  | 39343985 | 39352484 | AB106871     | chr6  | 39349004 | 39349782 |
| 6  | 39347466 | 39358026 | NM_018810    | chr6  | 39349004 | 39349782 |
| 1  | 39344957 | 39355915 | U88873       | chr1  | 39347099 | 39347951 |
| 9  | 39298941 | 39307440 | NM_146330    | chr9  | 39302153 | 39302763 |
| 9  | 39233323 | 39241822 | NM_146830    | chr9  | 39234999 | 39235644 |
| 9  | 39206004 | 39214503 | NM_146331    | chr9  | 39212071 | 39212673 |
| 9  | 39175141 | 39183640 | NM_146503    | chr9  | 39178819 | 39179300 |
| 10 | 39138331 | 39146830 | BC032149     | chr10 | 39142056 | 39142711 |
| 18 | 39113119 | 39121618 | NM_175164    | chr18 | 39118900 | 39119510 |
| 3  | 39072489 | 39080988 | NM_183221    | chr3  | 39080145 | 39080736 |
| 9  | 39067684 | 39076183 | NM_001011756 | chr9  | 39069164 | 39069761 |
| 19 | 38990098 | 38998636 | NM_008234    | chr19 | 38993137 | 38993720 |
| 13 | 38965496 | 38973998 | NM_134060    | chr13 | 38968021 | 38968727 |
| 1  | 38840039 | 38848707 | NM_145142    | chr1  | 38842091 | 38842699 |
| 2  | 38824125 | 38832647 | NM_028809    | chr2  | 38825363 | 38825973 |
| 2  | 38824623 | 38833140 | NM_025592    | chr2  | 38825363 | 38825973 |
| 16 | 38815677 | 38824176 | NM_170599    | chr16 | 38821493 | 38822352 |
| 9  | 38767611 | 38776110 | NM_146747    | chr9  | 38769562 | 38770178 |
| 9  | 38743505 | 38752004 | NM_146746    | chr9  | 38744844 | 38745699 |
| 9  | 38674660 | 38683161 | NM_146272    | chr9  | 38677689 | 38678275 |
| 10 | 38648993 | 38657756 | NM_010681    | chr10 | 38657750 | 38658399 |
| 15 | 38600522 | 38609049 | NM_025494    | chr15 | 38606543 | 38607137 |
| 9  | 38592687 | 38608134 | NM_146783    | chr9  | 38601522 | 38602135 |
| 5  | 38542477 | 38551134 | NM_025480    | chr5  | 38546662 | 38547299 |
| 18 | 38416658 | 38428899 | NM_020012    | chr18 | 38422479 | 38423214 |
| 2  | 38327706 | 38336322 | NM_021606    | chr2  | 38335922 | 38336260 |
| 5  | 38321484 | 38329999 | NM_026959    | chr5  | 38322397 | 38323010 |
| 9  | 38217320 | 38225819 | NM_146804    | chr9  | 38223572 | 38224223 |
| 13 | 38197950 | 38214932 | NM_026382    | chr13 | 38202765 | 38203843 |
| 2  | 38167317 | 38176092 | NM_010710    | chr2  | 38171158 | 38171843 |
| 5  | 38110119 | 38118834 | NM_010835    | chr5  | 38115075 | 38115805 |
| 18 | 38075572 | 38084099 | NM_153793    | chr18 | 38081534 | 38082223 |
| 18 | 38078403 | 38086962 | NM_010411    | chr18 | 38081534 | 38082223 |
| 9  | 38074063 | 38082562 | NM_146870    | chr9  | 38079842 | 38080615 |
| 1  | 38071709 | 38080208 | NM_019570    | chr1  | 38074183 | 38075079 |
| 6  | 38051489 | 38060182 | NM_080467    | chr6  | 38052050 | 38052835 |
| 13 | 38038748 | 38047260 | NM_024242    | chr13 | 38044235 | 38045142 |
| 13 | 38042036 | 38050535 | NM_027724    | chr13 | 38044235 | 38045142 |
| 5  | 38017797 | 38026296 | BC116224     | chr5  | 38019480 | 38020174 |
| 16 | 38002240 | 38012243 | NM_019827    | chr16 | 38007321 | 38007921 |
| 17 | 37937212 | 37945711 | NM_146807    | chr17 | 37943399 | 37944075 |
| 7  | 37928756 | 37943047 | NM_024413    | chr7  | 37936005 | 37936826 |
| 1  | 37858540 | 37867039 | NM_001033427 | chr1  | 37862287 | 37862835 |
| 16 | 37829735 | 37838234 | NM_153394    | chr16 | 37836803 | 37837398 |
| 16 | 37829735 | 37838234 | NM_153394    | chr16 | 37833463 | 37834205 |

|    |          |          |              |       |          |          |
|----|----------|----------|--------------|-------|----------|----------|
| 18 | 37794309 | 37822874 | NM_033586    | chr18 | 37817247 | 37817832 |
| 17 | 37810222 | 37818721 | NM_146332    | chr17 | 37812200 | 37813108 |
| 16 | 37781628 | 37790138 | NM_177093    | chr16 | 37788033 | 37788710 |
| 17 | 37750643 | 37759142 | NM_146831    | chr17 | 37752852 | 37753464 |
| 17 | 37736744 | 37745243 | NM_001005481 | chr17 | 37740444 | 37741250 |
| 1  | 37661858 | 37670357 | BC072639     | chr1  | 37669664 | 37670251 |
| 1  | 37661858 | 37670357 | BC072639     | chr1  | 37668754 | 37669408 |
| 17 | 37661145 | 37669644 | NM_146327    | chr17 | 37667081 | 37667677 |
| 9  | 37641077 | 37649576 | NM_146313    | chr9  | 37647531 | 37648526 |
| 9  | 37641077 | 37649576 | NM_146313    | chr9  | 37646279 | 37646949 |
| 9  | 37641077 | 37649576 | NM_146313    | chr9  | 37644438 | 37644985 |
| 18 | 37633626 | 37646832 | NM_053147    | chr18 | 37641371 | 37642217 |
| 18 | 37593514 | 37632802 | NM_053143    | chr18 | 37622920 | 37623504 |
| 18 | 37593514 | 37632802 | NM_053143    | chr18 | 37612123 | 37613015 |
| 18 | 37555759 | 37576153 | NM_053139    | chr18 | 37574993 | 37575699 |
| 1  | 37567289 | 37575788 | BC029089     | chr1  | 37571631 | 37572233 |
| 18 | 37541392 | 37549891 | NM_053136    | chr18 | 37547712 | 37548331 |
| 17 | 37525621 | 37534120 | NM_206816    | chr17 | 37526127 | 37526603 |
| 19 | 37493985 | 37502497 | NM_008245    | chr19 | 37501690 | 37502460 |
| 19 | 37493985 | 37502497 | NM_008245    | chr19 | 37494862 | 37495575 |
| 1  | 37478179 | 37486678 | NM_173870    | chr1  | 37484512 | 37485128 |
| 17 | 37452647 | 37461146 | NM_146890    | chr17 | 37458993 | 37459598 |
| 16 | 37453133 | 37461632 | NM_001042499 | chr16 | 37458791 | 37459369 |
| 16 | 37456509 | 37465028 | NM_028812    | chr16 | 37458791 | 37459369 |
| 17 | 37436964 | 37445463 | NM_146290    | chr17 | 37444588 | 37445388 |
| 1  | 37372057 | 37380596 | NM_198006    | chr1  | 37378679 | 37379696 |
| 6  | 37369219 | 37377747 | NM_178661    | chr6  | 37373936 | 37374565 |
| 5  | 37333165 | 37341664 | NM_178394    | chr5  | 37335813 | 37336709 |
| 16 | 37301663 | 37310162 | NM_172440    | chr16 | 37303540 | 37304489 |
| 9  | 37260950 | 37269449 | BC024479     | chr9  | 37264657 | 37265258 |
| 2  | 37242406 | 37258872 | NM_146253    | chr2  | 37253226 | 37253821 |
| 17 | 37216309 | 37224808 | NM_001011753 | chr17 | 37217930 | 37218558 |
| 3  | 37194042 | 37205625 | BC079623     | chr3  | 37203189 | 37203802 |
| 15 | 37171625 | 37180404 | NM_026496    | chr15 | 37174456 | 37175057 |
| 5  | 37150819 | 37159318 | NM_172994    | chr5  | 37156265 | 37156812 |
| 2  | 37147758 | 37156257 | NM_146374    | chr2  | 37149732 | 37150350 |
| 18 | 37087605 | 37102275 | NM_001003672 | chr18 | 37087727 | 37088691 |
| 18 | 37072649 | 37081214 | NM_007766    | chr18 | 37080149 | 37080974 |
| 18 | 37050158 | 37058657 | NM_198117    | chr18 | 37056453 | 37057086 |
| 2  | 36905256 | 36913755 | NM_146368    | chr2  | 36906913 | 36907546 |
| 5  | 36886635 | 36907919 | NM_133910    | chr5  | 36896618 | 36897205 |
| 16 | 36848252 | 36859023 | NM_008225    | chr16 | 36856030 | 36856628 |
| 17 | 36827144 | 36835643 | NM_146514    | chr17 | 36833491 | 36834130 |
| 17 | 36817405 | 36825904 | NM_146513    | chr17 | 36824443 | 36824791 |
| 3  | 36738176 | 36746691 | NM_019393    | chr3  | 36744456 | 36745041 |
| 3  | 36738176 | 36746691 | NM_019393    | chr3  | 36743078 | 36743696 |
| 1  | 36717530 | 36726029 | AB083210     | chr1  | 36722649 | 36723239 |



|    |          |          |              |       |          |          |
|----|----------|----------|--------------|-------|----------|----------|
| 2  | 36685577 | 36694076 | NM_146940    | chr2  | 36691605 | 36692199 |
| 2  | 36679856 | 36688355 | NM_146942    | chr2  | 36681853 | 36682781 |
| 2  | 36627922 | 36641099 | NM_206903    | chr2  | 36635813 | 36636414 |
| 9  | 36544240 | 36552739 | NM_007915    | chr9  | 36546165 | 36547158 |
| 17 | 36495599 | 36504098 | NM_001033235 | chr17 | 36501554 | 36502604 |
| 6  | 36447362 | 36455861 | NM_203491    | chr6  | 36448486 | 36449153 |
| 8  | 36431708 | 36440207 | NM_175091    | chr8  | 36433013 | 36434512 |
| 2  | 36299638 | 36308137 | NM_146950    | chr2  | 36302484 | 36303211 |
| 8  | 36270127 | 36278652 | NM_176933    | chr8  | 36275737 | 36276656 |
| 2  | 36237409 | 36245908 | NM_146949    | chr2  | 36241065 | 36241982 |
| 15 | 36208106 | 36216618 | NM_013923    | chr15 | 36209641 | 36210289 |
| 17 | 36149128 | 36157627 | NM_177635    | chr17 | 36152394 | 36152980 |
| 17 | 36149128 | 36157627 | NM_177635    | chr17 | 36149276 | 36149899 |
| 3  | 36119124 | 36130426 | NM_033623    | chr3  | 36128712 | 36129305 |
| 12 | 36117477 | 36126061 | NM_013464    | chr12 | 36117857 | 36118486 |
| 15 | 36106974 | 36115473 | BC098484     | chr15 | 36113490 | 36114116 |
| 15 | 36108388 | 36126618 | NM_012031    | chr15 | 36113490 | 36114116 |
| 5  | 36038308 | 36046958 | NM_194344    | chr5  | 36040831 | 36041417 |
| 1  | 36006946 | 36015454 | NM_015818    | chr1  | 36011995 | 36013044 |
| 1  | 36006946 | 36015454 | NM_015818    | chr1  | 36009014 | 36009696 |
| 16 | 35988763 | 35997271 | NM_027342    | chr16 | 35995000 | 35995592 |
| 16 | 35985432 | 35993931 | NM_198645    | chr16 | 35987960 | 35988803 |
| 16 | 35988763 | 35997271 | NM_027342    | chr16 | 35987960 | 35988803 |
| 5  | 35889422 | 35897921 | NM_030208    | chr5  | 35890516 | 35891227 |
| 18 | 35677006 | 35690719 | BC029070     | chr18 | 35688829 | 35689540 |
| 17 | 35481872 | 35490377 | NM_026987    | chr17 | 35489058 | 35489733 |
| 17 | 35463371 | 35476145 | NM_134122    | chr17 | 35474402 | 35475007 |
| 16 | 35455109 | 35463817 | NM_013661    | chr16 | 35460215 | 35461927 |
| 5  | 35420059 | 35428558 | NM_013587    | chr5  | 35424911 | 35425568 |
| 16 | 35408121 | 35416620 | NM_028295    | chr16 | 35410476 | 35410999 |
| 8  | 35393227 | 35401776 | NM_019733    | chr8  | 35394297 | 35395074 |
| 5  | 35352417 | 35360948 | NM_019447    | chr5  | 35353988 | 35354581 |
| 7  | 35291799 | 35300304 | NM_145840    | chr7  | 35292102 | 35292989 |
| 18 | 35238863 | 35247405 | NM_009818    | chr18 | 35239865 | 35240585 |
| 18 | 35077798 | 35086325 | NM_010481    | chr18 | 35079880 | 35080562 |
| 17 | 35072142 | 35080641 | NM_010391    | chr17 | 35078784 | 35079499 |
| 13 | 34968749 | 34977274 | NM_026947    | chr13 | 34972108 | 34972586 |
| 9  | 34938752 | 34954992 | NM_054096    | chr9  | 34951958 | 34952606 |
| 19 | 34941337 | 34951452 | NM_023792    | chr19 | 34945119 | 34945823 |
| 2  | 34925501 | 34934022 | BC038386     | chr2  | 34930969 | 34931652 |
| 4  | 34916566 | 34925065 | NM_027041    | chr4  | 34918884 | 34919518 |
| 13 | 34876961 | 34885460 | NM_013830    | chr13 | 34882207 | 34883142 |
| 4  | 34873741 | 34882240 | NM_011895    | chr4  | 34875931 | 34876557 |
| 7  | 34822063 | 34830562 | NM_007678    | chr7  | 34825534 | 34826205 |
| 6  | 34787298 | 34795805 | NM_197986    | chr6  | 34788246 | 34788856 |
| 15 | 34775944 | 34785137 | NM_181317    | chr15 | 34777939 | 34778768 |
| 17 | 34723593 | 34745797 | NM_057171    | chr17 | 34735126 | 34735809 |

|   |    |          |          |              |       |          |          |
|---|----|----------|----------|--------------|-------|----------|----------|
|   | 2  | 34690405 | 34698944 | NM_030021    | chr2  | 34693810 | 34694421 |
|   | 2  | 34690437 | 34698948 | NM_080554    | chr2  | 34693810 | 34694421 |
|   | 2  | 34690405 | 34698944 | NM_030021    | chr2  | 34692304 | 34692962 |
|   | 2  | 34690437 | 34698948 | NM_080554    | chr2  | 34692304 | 34692962 |
|   | 13 | 34657637 | 34666146 | NM_025831    | chr13 | 34660112 | 34660715 |
|   | 5  | 34602682 | 34611183 | NM_001015039 | chr5  | 34608484 | 34609090 |
|   | 16 | 34604457 | 34612978 | NM_172824    | chr16 | 34605234 | 34605815 |
|   | 12 | 34536918 | 34545596 | NM_011658    | chr12 | 34538607 | 34539222 |
|   | 5  | 34502068 | 34510567 | NM_010753    | chr5  | 34509937 | 34510469 |
|   | 5  | 34502068 | 34510567 | NM_010753    | chr5  | 34503743 | 34504558 |
|   | 17 | 34452447 | 34460994 | NM_001045864 | chr17 | 34458694 | 34459529 |
|   | 17 | 34455733 | 34464260 | NM_021337    | chr17 | 34458694 | 34459529 |
|   | 2  | 34439938 | 34448744 | BC012681     | chr2  | 34442819 | 34443409 |
|   | 19 | 34350663 | 34359182 | NM_007987    | chr19 | 34353450 | 34354035 |
|   | 18 | 34339785 | 34348284 | NM_007462    | chr18 | 34346409 | 34347149 |
| X |    | 34305102 | 34313657 | NM_001024850 | chrX  | 34310700 | 34311620 |
|   | 19 | 34292622 | 34301121 | AB066212     | chr19 | 34294826 | 34295435 |
|   | 17 | 34246939 | 34257766 | NM_017406    | chr17 | 34253864 | 34254846 |
|   | 11 | 34208822 | 34217321 | NM_001025382 | chr11 | 34216267 | 34216833 |
|   | 3  | 34205657 | 34214157 | NM_008053    | chr3  | 34211274 | 34211916 |
|   | 2  | 34191446 | 34200047 | NM_016768    | chr2  | 34198783 | 34199486 |
|   | 2  | 34191446 | 34200047 | NM_016768    | chr2  | 34192456 | 34193602 |
|   | 17 | 34166351 | 34174885 | NM_010929    | chr17 | 34169081 | 34169691 |
|   | 19 | 34160965 | 34169469 | BC031933     | chr19 | 34164025 | 34164705 |
|   | 19 | 34160965 | 34169469 | BC031933     | chr19 | 34162912 | 34163506 |
| X |    | 34143837 | 34152397 | NM_023894    | chrX  | 34145598 | 34146343 |
|   | 13 | 34135320 | 34143819 | NM_023716    | chr13 | 34138739 | 34139340 |
|   | 13 | 34135320 | 34143819 | NM_023716    | chr13 | 34136948 | 34138005 |
| X |    | 34065674 | 34078812 | NM_001025086 | chrX  | 34070912 | 34071870 |
|   | 5  | 33966664 | 33980735 | NM_026698    | chr5  | 33974522 | 33975138 |
|   | 10 | 33965642 | 33974158 | NM_009433    | chr10 | 33967936 | 33968649 |
|   | 10 | 33894468 | 33902967 | NM_172508    | chr10 | 33899498 | 33900088 |
| X |    | 33814492 | 33822991 | NM_001039695 | chrX  | 33820425 | 33821039 |
|   | 17 | 33802583 | 33817290 | NM_011530    | chr17 | 33807267 | 33807856 |
|   | 17 | 33802583 | 33817290 | NM_011530    | chr17 | 33803945 | 33804392 |
|   | 17 | 33749886 | 33758471 | NM_010388    | chr17 | 33749879 | 33750416 |
|   | 17 | 33740082 | 33748581 | NM_010386    | chr17 | 33745700 | 33746318 |
| X |    | 33732451 | 33740970 | NM_021300    | chrX  | 33738103 | 33739269 |
|   | 12 | 33727027 | 33735526 | NM_028139    | chr12 | 33732506 | 33733140 |
|   | 7  | 33724327 | 33732826 | NM_009596    | chr7  | 33730189 | 33730788 |
|   | 10 | 33706415 | 33715032 | NM_025614    | chr10 | 33706869 | 33707465 |
|   | 17 | 33631887 | 33648012 | NM_009066    | chr17 | 33647626 | 33648292 |
|   | 17 | 33636306 | 33652390 | NM_009926    | chr17 | 33647626 | 33648292 |
|   | 14 | 33643258 | 33651757 | NM_008166    | chr14 | 33646908 | 33647698 |
|   | 17 | 33605710 | 33616743 | NM_019909    | chr17 | 33609819 | 33610648 |
|   | 18 | 33585728 | 33594243 | NM_053078    | chr18 | 33587948 | 33588580 |
| X |    | 33552240 | 33560764 | NM_025937    | chrX  | 33560339 | 33560689 |

|   |    |          |          |              |       |          |          |
|---|----|----------|----------|--------------|-------|----------|----------|
|   | 4  | 33515851 | 33524350 | NM_001034867 | chr4  | 33517884 | 33518508 |
|   | 2  | 33460118 | 33468617 | NM_010725    | chr2  | 33461021 | 33461658 |
|   | 2  | 33460118 | 33468617 | NM_010725    | chr2  | 33459909 | 33460504 |
|   | 13 | 33438068 | 33446567 | U96701       | chr13 | 33441617 | 33442379 |
|   | 17 | 33410632 | 33433084 | NM_030697    | chr17 | 33430431 | 33431309 |
|   | 17 | 33428034 | 33436533 | BC125644     | chr17 | 33430431 | 33431309 |
|   | 17 | 33410632 | 33433084 | NM_030697    | chr17 | 33425055 | 33425648 |
|   | 12 | 33399582 | 33411862 | NM_021524    | chr12 | 33408926 | 33409688 |
|   | 12 | 33399582 | 33411862 | NM_021524    | chr12 | 33405664 | 33406284 |
|   | 17 | 33385819 | 33394455 | NM_020581    | chr17 | 33388076 | 33388951 |
|   | 17 | 33385819 | 33394455 | NM_020581    | chr17 | 33387297 | 33388031 |
|   | 14 | 33329139 | 33337638 | NM_009758    | chr14 | 33331900 | 33332518 |
|   | 13 | 33325542 | 33334041 | NM_183197    | chr13 | 33330973 | 33331644 |
| X |    | 33303061 | 33311560 | BC021479     | chrX  | 33306507 | 33307364 |
|   | 3  | 33272079 | 33280578 | NM_021483    | chr3  | 33273779 | 33274372 |
| X |    | 33221094 | 33229616 | NM_007451    | chrX  | 33226232 | 33226841 |
|   | 14 | 33201243 | 33209752 | NM_011430    | chr14 | 33204865 | 33205492 |
|   | 5  | 33142033 | 33150858 | NM_194340    | chr5  | 33149059 | 33149647 |
|   | 5  | 33099983 | 33108483 | NM_177298    | chr5  | 33107670 | 33108272 |
|   | 11 | 33100960 | 33109459 | NM_019916    | chr11 | 33101855 | 33102721 |
|   | 13 | 32966909 | 32975477 | NM_011454    | chr13 | 32972370 | 32972975 |
|   | 13 | 32902074 | 32911605 | NM_173051    | chr13 | 32905136 | 32905761 |
|   | 3  | 32894275 | 32902806 | NM_019673    | chr3  | 32900196 | 32900782 |
|   | 13 | 32803495 | 32812745 | NM_030215    | chr13 | 32811227 | 32811961 |
|   | 12 | 32790958 | 32799858 | NM_020272    | chr12 | 32792806 | 32793409 |
|   | 2  | 32780761 | 32789260 | NM_199302    | chr2  | 32784776 | 32785362 |
|   | 10 | 32766956 | 32775476 | AF223416     | chr10 | 32770007 | 32770612 |
| X |    | 32753854 | 32762451 | NM_028894    | chrX  | 32759127 | 32759744 |
|   | 18 | 32700485 | 32709044 | NM_001048207 | chr18 | 32704105 | 32704527 |
|   | 2  | 32591795 | 32600298 | NM_178595    | chr2  | 32599602 | 32600787 |
|   | 2  | 32594849 | 32603642 | NM_177384    | chr2  | 32599602 | 32600787 |
|   | 16 | 32586906 | 32595405 | BC031168     | chr16 | 32594530 | 32595125 |
|   | 19 | 32545766 | 32554402 | NM_010799    | chr19 | 32551083 | 32551714 |
|   | 18 | 32514240 | 32522783 | NM_009668    | chr18 | 32521610 | 32522218 |
|   | 6  | 32515851 | 32524350 | NM_175750    | chr6  | 32517569 | 32518185 |
|   | 2  | 32386867 | 32400335 | NM_198191    | chr2  | 32399508 | 32400094 |
|   | 2  | 32386867 | 32400335 | NM_198191    | chr2  | 32390751 | 32391646 |
|   | 15 | 32285853 | 32294352 | BC065137     | chr15 | 32287893 | 32288482 |
|   | 2  | 32243513 | 32259128 | BC066998     | chr2  | 32250779 | 32251397 |
|   | 12 | 32217237 | 32225846 | NM_007530    | chr12 | 32221750 | 32223327 |
|   | 2  | 32179243 | 32187861 | NM_028412    | chr2  | 32185177 | 32185815 |
|   | 11 | 32165771 | 32189466 | NM_001033981 | chr11 | 32183409 | 32184018 |
|   | 14 | 32142860 | 32151359 | BC038272     | chr14 | 32149363 | 32149969 |
|   | 15 | 32115876 | 32124375 | NM_020503    | chr15 | 32122132 | 32122727 |
|   | 1  | 32111273 | 32119851 | NM_133235    | chr1  | 32117705 | 32118352 |
|   | 18 | 32033921 | 32042420 | BC003939     | chr18 | 32036376 | 32037018 |
|   | 18 | 31941067 | 31949685 | NM_028866    | chr18 | 31946843 | 31947469 |

|    |          |          |           |       |          |          |
|----|----------|----------|-----------|-------|----------|----------|
| 11 | 31894428 | 31902986 | NM_008741 | chr11 | 31899086 | 31899786 |
| 5  | 31884549 | 31893065 | NM_025796 | chr5  | 31890585 | 31891235 |
| 16 | 31865729 | 31874228 | BC021536  | chr16 | 31871211 | 31871821 |
| 16 | 31847701 | 31870885 | NM_172822 | chr16 | 31853620 | 31854298 |
| 13 | 31808111 | 31816799 | NM_008592 | chr13 | 31815517 | 31816134 |
| 2  | 31790490 | 31799001 | BC039282  | chr2  | 31796046 | 31796914 |
| 5  | 31765342 | 31773841 | NM_133756 | chr5  | 31770979 | 31771757 |
| 17 | 31581989 | 31590502 | NM_010831 | chr17 | 31583808 | 31584420 |
| 5  | 31565132 | 31578458 | NM_026298 | chr5  | 31568890 | 31569578 |
| 5  | 31568162 | 31576661 | NM_144909 | chr5  | 31568890 | 31569578 |
| 15 | 31540705 | 31552996 | NM_026546 | chr15 | 31547254 | 31547917 |
| 15 | 31543841 | 31552393 | NM_007637 | chr15 | 31547254 | 31547917 |
| 15 | 31540705 | 31552996 | NM_026546 | chr15 | 31545602 | 31546608 |
| 15 | 31543841 | 31552393 | NM_007637 | chr15 | 31545602 | 31546608 |
| 5  | 31466839 | 31475674 | NM_010122 | chr5  | 31474079 | 31474806 |
| 17 | 31306404 | 31314903 | NM_016670 | chr17 | 31308610 | 31309433 |
| 16 | 31192470 | 31201024 | NM_025800 | chr16 | 31194470 | 31195059 |
| 12 | 31164523 | 31173022 | NM_172049 | chr12 | 31164848 | 31165486 |
| 7  | 31005521 | 31014020 | NM_207262 | chr7  | 31007598 | 31008504 |
| 10 | 30996821 | 31005320 | NM_027168 | chr10 | 31001442 | 31002039 |
| 1  | 30891765 | 30900301 | NM_011200 | chr1  | 30898484 | 30899078 |
| 6  | 30886646 | 30895145 | DQ534758  | chr6  | 30889205 | 30889908 |
| 14 | 30851998 | 30860497 | NM_030166 | chr14 | 30853972 | 30854551 |
| 7  | 30832985 | 30841788 | NM_011322 | chr7  | 30837229 | 30837647 |
| 2  | 30798343 | 30806842 | AF449715  | chr2  | 30806743 | 30807332 |
| 2  | 30801396 | 30809895 | NM_144885 | chr2  | 30806743 | 30807332 |
| 3  | 30784103 | 30796752 | NM_029690 | chr3  | 30794433 | 30795021 |
| 3  | 30786925 | 30796840 | NM_030557 | chr3  | 30794433 | 30795021 |
| 6  | 30677516 | 30690576 | NM_008590 | chr6  | 30688089 | 30688981 |
| 6  | 30677516 | 30690576 | NM_008590 | chr6  | 30683654 | 30684726 |
| 13 | 30550282 | 30558788 | NM_025710 | chr13 | 30552635 | 30553377 |
| 10 | 30529640 | 30538199 | NM_013904 | chr10 | 30532929 | 30533789 |
| 16 | 30513470 | 30521969 | NM_177632 | chr16 | 30516266 | 30516901 |
| 16 | 30513470 | 30521969 | NM_177632 | chr16 | 30515383 | 30515982 |
| 7  | 30454231 | 30462801 | NM_172205 | chr7  | 30461222 | 30462092 |
| 7  | 30294987 | 30306663 | NM_029274 | chr7  | 30298906 | 30300011 |
| 7  | 30294987 | 30306663 | NM_029274 | chr7  | 30297466 | 30298229 |
| 7  | 30258533 | 30277946 | NM_183321 | chr7  | 30273048 | 30274157 |
| 7  | 30266100 | 30277339 | NM_145580 | chr7  | 30273048 | 30274157 |
| 17 | 30254879 | 30263378 | NM_172618 | chr17 | 30255704 | 30256345 |
| 7  | 30236886 | 30249772 | NM_178252 | chr7  | 30238663 | 30239289 |
| 3  | 30182277 | 30190776 | NM_007963 | chr3  | 30186653 | 30187250 |
| 2  | 30178741 | 30187314 | NM_139302 | chr2  | 30180742 | 30181511 |
| 2  | 30180281 | 30188843 | NM_175392 | chr2  | 30180742 | 30181511 |
| 7  | 30116548 | 30125047 | NM_011662 | chr7  | 30120664 | 30121192 |
| 2  | 30082558 | 30091245 | NM_172267 | chr2  | 30088674 | 30089429 |
| 2  | 29997494 | 30006464 | NM_172660 | chr2  | 29997692 | 29998850 |

|    |          |          |              |       |          |          |
|----|----------|----------|--------------|-------|----------|----------|
| 13 | 29991029 | 29999528 | NM_010093    | chr13 | 29995160 | 29995869 |
| 7  | 29986657 | 29995156 | BC054747     | chr7  | 29988562 | 29989276 |
| 16 | 29979104 | 29987603 | NM_008235    | chr16 | 29981178 | 29981765 |
| 14 | 29957862 | 29966361 | NM_027289    | chr14 | 29963140 | 29963787 |
| 14 | 29957862 | 29966361 | NM_027289    | chr14 | 29961296 | 29962019 |
| 2  | 29949875 | 29958376 | NM_146252    | chr2  | 29956286 | 29956875 |
| 14 | 29912477 | 29920976 | BC055708     | chr14 | 29915720 | 29916330 |
| 14 | 29845490 | 29854070 | NM_153547    | chr14 | 29848787 | 29849342 |
| 14 | 29689454 | 29697953 | BC024583     | chr14 | 29692182 | 29692803 |
| 6  | 29679513 | 29688487 | NM_176996    | chr6  | 29685999 | 29686645 |
| 7  | 29658154 | 29666653 | NM_178384    | chr7  | 29662338 | 29662963 |
| 7  | 29606749 | 29620864 | NM_001037707 | chr7  | 29616787 | 29617575 |
| 7  | 29606749 | 29620864 | NM_001037707 | chr7  | 29615062 | 29615673 |
| 11 | 29586947 | 29596273 | NM_194054    | chr11 | 29594224 | 29594836 |
| 11 | 29586947 | 29596273 | NM_194054    | chr11 | 29592070 | 29592684 |
| 6  | 29470743 | 29479242 | NM_012057    | chr6  | 29477215 | 29477881 |
| 10 | 29386276 | 29394783 | NM_009076    | chr10 | 29388353 | 29388999 |
| 12 | 29332134 | 29340633 | NM_201357    | chr12 | 29333004 | 29333711 |
| 14 | 29317666 | 29326165 | NM_028981    | chr14 | 29317788 | 29318425 |
| 17 | 29293901 | 29302400 | BC060066     | chr17 | 29295217 | 29295817 |
| 11 | 29267775 | 29276274 | NM_176841    | chr11 | 29273348 | 29273982 |
| 10 | 29222718 | 29231241 | NM_028351    | chr10 | 29224910 | 29225765 |
| 17 | 29211824 | 29220556 | NM_008842    | chr17 | 29215996 | 29216616 |
| 19 | 29111400 | 29119952 | NM_021299    | chr19 | 29111943 | 29112540 |
| 6  | 29102602 | 29120679 | NM_133925    | chr6  | 29108367 | 29109097 |
| 11 | 29066967 | 29075495 | NM_134034    | chr11 | 29072021 | 29073630 |
| 19 | 29050364 | 29058996 | NM_025950    | chr19 | 29056358 | 29056955 |
| 4  | 28975919 | 28984537 | NM_010141    | chr4  | 28983585 | 28984171 |
| 13 | 28958648 | 28967147 | NM_009238    | chr13 | 28960990 | 28961662 |
| 19 | 28955790 | 28964289 | U75214       | chr19 | 28960294 | 28960645 |
| 8  | 28877381 | 28893366 | NM_021369    | chr8  | 28878873 | 28879478 |
| 16 | 28846861 | 28855445 | NM_177718    | chr16 | 28850058 | 28850727 |
| 19 | 28743575 | 28752074 | NM_175459    | chr19 | 28744284 | 28745581 |
| 2  | 28735932 | 28744677 | NM_019446    | chr2  | 28738387 | 28738970 |
| 10 | 28673208 | 28681724 | NM_026336    | chr10 | 28674091 | 28674682 |
| 17 | 28544228 | 28552727 | BC048580     | chr17 | 28548828 | 28549438 |
| 17 | 28412931 | 28421599 | NM_011951    | chr17 | 28420977 | 28421977 |
| 17 | 28415077 | 28423576 | NM_146076    | chr17 | 28420977 | 28421977 |
| 10 | 28351776 | 28360428 | NM_178666    | chr10 | 28355597 | 28356238 |
| 17 | 28347513 | 28356043 | NM_016795    | chr17 | 28349311 | 28350383 |
| 2  | 28281960 | 28292583 | NM_080452    | chr2  | 28291364 | 28292050 |
| 2  | 28285834 | 28294341 | NM_027040    | chr2  | 28291364 | 28292050 |
| 7  | 28095756 | 28104274 | NM_019458    | chr7  | 28101048 | 28101820 |
| 7  | 28098934 | 28107433 | NM_026042    | chr7  | 28101048 | 28101820 |
| 7  | 28077646 | 28095013 | NM_138752    | chr7  | 28084459 | 28085076 |
| 19 | 28074638 | 28083137 | NM_011265    | chr19 | 28077296 | 28078098 |
| 17 | 28050188 | 28058693 | BC006039     | chr17 | 28055009 | 28055641 |

|    |          |          |           |       |          |          |
|----|----------|----------|-----------|-------|----------|----------|
| 17 | 27954343 | 27962891 | NM_011145 | chr17 | 27957677 | 27958303 |
| 17 | 27929367 | 27937918 | NM_027185 | chr17 | 27935808 | 27936407 |
| 13 | 27647430 | 27655958 | NM_008930 | chr13 | 27655009 | 27655653 |
| 15 | 27623724 | 27632240 | NM_198301 | chr15 | 27625626 | 27626372 |
| 15 | 27623724 | 27632240 | NM_198301 | chr15 | 27623797 | 27624619 |
| 13 | 27587094 | 27595636 | NM_028477 | chr13 | 27594330 | 27594781 |
| 13 | 27569538 | 27578069 | NM_023332 | chr13 | 27569853 | 27570454 |
| 3  | 27556424 | 27565316 | NM_177330 | chr3  | 27560956 | 27561632 |
| 8  | 27452787 | 27465666 | NM_029037 | chr8  | 27458929 | 27459765 |
| 8  | 27439686 | 27448289 | NM_029884 | chr8  | 27443742 | 27444468 |
| 13 | 27395763 | 27404311 | NM_025532 | chr13 | 27397897 | 27398480 |
| 7  | 27356683 | 27365183 | NM_028417 | chr7  | 27362700 | 27363606 |
| 14 | 27326339 | 27335221 | NM_009524 | chr14 | 27332334 | 27332942 |
| 14 | 27326339 | 27335221 | NM_009524 | chr14 | 27329322 | 27330039 |
| 7  | 27308618 | 27318595 | NM_007434 | chr7  | 27310146 | 27310740 |
| 10 | 27303760 | 27312358 | NM_008481 | chr10 | 27304752 | 27305462 |
| 2  | 27294698 | 27303630 | NM_023336 | chr2  | 27297165 | 27297773 |
| 17 | 27278171 | 27295200 | NM_016660 | chr17 | 27284526 | 27285164 |
| 2  | 27246335 | 27254921 | NM_009500 | chr2  | 27252676 | 27253313 |
| 13 | 27243895 | 27252409 | NM_008865 | chr13 | 27248713 | 27249347 |
| 8  | 27248238 | 27256754 | NM_026121 | chr8  | 27248338 | 27248684 |
| 5  | 27229565 | 27238064 | BC085154  | chr5  | 27234786 | 27235404 |
| 7  | 27189670 | 27198305 | NM_018820 | chr7  | 27195400 | 27196560 |
| 7  | 27062269 | 27070779 | NM_138676 | chr7  | 27063895 | 27064510 |
| 7  | 27039885 | 27052452 | NM_175641 | chr7  | 27044738 | 27045445 |
| 7  | 27039885 | 27052452 | NM_175641 | chr7  | 27040634 | 27041401 |
| 17 | 26928838 | 26938007 | NM_146075 | chr17 | 26932816 | 26933548 |
| 7  | 26902021 | 26911031 | NM_015782 | chr7  | 26904263 | 26904940 |
| 2  | 26825959 | 26840604 | NM_029862 | chr2  | 26831901 | 26832525 |
| 19 | 26809500 | 26821543 | NM_026003 | chr19 | 26813290 | 26813986 |
| 9  | 26773621 | 26782594 | NM_178113 | chr9  | 26780030 | 26780497 |
| 9  | 26776965 | 26785503 | NM_178027 | chr9  | 26780030 | 26780497 |
| 2  | 26722323 | 26744539 | NM_011513 | chr2  | 26742539 | 26743296 |
| 2  | 26722323 | 26744539 | NM_011513 | chr2  | 26732487 | 26733098 |
| 2  | 26726816 | 26740929 | NM_013678 | chr2  | 26732487 | 26733098 |
| 11 | 26679108 | 26687607 | BC098095  | chr11 | 26687132 | 26687775 |
| 11 | 26679108 | 26687607 | BC098095  | chr11 | 26681428 | 26682018 |
| 17 | 26654716 | 26663479 | NM_009343 | chr17 | 26662078 | 26662684 |
| 7  | 26511682 | 26520181 | NM_013809 | chr7  | 26512409 | 26513125 |
| 2  | 26490791 | 26499291 | NM_010695 | chr2  | 26498564 | 26499269 |
| 9  | 26477261 | 26485867 | AB055781  | chr9  | 26483053 | 26483694 |
| 8  | 26476798 | 26485328 | NM_027194 | chr8  | 26482747 | 26483441 |
| 8  | 26479834 | 26488450 | NM_007404 | chr8  | 26482747 | 26483441 |
| 2  | 26323147 | 26331807 | NM_008714 | chr2  | 26330309 | 26330904 |
| 2  | 26323147 | 26331807 | NM_008714 | chr2  | 26325543 | 26326189 |
| 3  | 26322340 | 26330839 | BC005523  | chr3  | 26325038 | 26325654 |
| 2  | 26323147 | 26331807 | NM_008714 | chr2  | 26323749 | 26324765 |

|    |          |          |              |       |          |          |
|----|----------|----------|--------------|-------|----------|----------|
| 7  | 26318339 | 26326838 | NM_134231    | chr7  | 26322341 | 26323094 |
| 2  | 26208775 | 26217315 | NM_026563    | chr2  | 26214622 | 26215228 |
| 2  | 26171620 | 26194265 | NM_026828    | chr2  | 26189220 | 26189818 |
| 2  | 26131549 | 26144287 | NM_153410    | chr2  | 26137324 | 26137933 |
| 10 | 26060873 | 26079510 | NM_172787    | chr10 | 26066938 | 26067612 |
| 2  | 25942291 | 25950820 | NM_026495    | chr2  | 25944257 | 25944910 |
| 8  | 25901992 | 25910491 | NM_026931    | chr8  | 25903646 | 25904762 |
| 10 | 25765567 | 25774468 | NM_029881    | chr10 | 25767707 | 25768795 |
| 6  | 25753453 | 25765236 | NM_133931    | chr6  | 25753765 | 25754366 |
| 16 | 25711265 | 25719790 | NM_011641    | chr16 | 25715007 | 25715602 |
| 17 | 25710807 | 25719306 | NM_015830    | chr17 | 25711447 | 25712063 |
| 12 | 25677394 | 25691170 | NM_010496    | chr12 | 25688725 | 25689423 |
| 12 | 25677394 | 25691170 | NM_010496    | chr12 | 25687308 | 25688138 |
| 17 | 25644652 | 25653302 | NM_139154    | chr17 | 25647292 | 25647899 |
| 17 | 25586576 | 25602338 | NM_026633    | chr17 | 25591850 | 25592558 |
| 17 | 25558009 | 25585342 | NM_145999    | chr17 | 25568583 | 25569208 |
| 17 | 25558009 | 25585342 | NM_145999    | chr17 | 25564120 | 25564660 |
| 17 | 25538015 | 25559180 | NM_173741    | chr17 | 25558463 | 25559063 |
| 17 | 25558009 | 25585342 | NM_145999    | chr17 | 25558463 | 25559063 |
| 17 | 25538015 | 25559180 | NM_173741    | chr17 | 25545798 | 25546426 |
| 17 | 25538015 | 25559180 | NM_173741    | chr17 | 25544477 | 25545517 |
| 17 | 25538015 | 25559180 | NM_173741    | chr17 | 25541327 | 25541929 |
| 2  | 25516047 | 25531387 | NM_023326    | chr2  | 25528587 | 25529254 |
| 2  | 25389321 | 25408108 | NM_001005424 | chr2  | 25401158 | 25401783 |
| 2  | 25389321 | 25408108 | NM_001005424 | chr2  | 25398398 | 25399007 |
| 18 | 25306030 | 25314529 | NM_001033532 | chr18 | 25311334 | 25312072 |
| 18 | 25309132 | 25317640 | NM_001004361 | chr18 | 25311334 | 25312072 |
| 17 | 25300787 | 25309288 | NM_029624    | chr17 | 25307551 | 25308214 |
| 12 | 25291333 | 25299863 | NM_009104    | chr12 | 25296758 | 25297362 |
| 17 | 25295756 | 25304286 | NM_011447    | chr17 | 25296399 | 25297031 |
| 5  | 25264062 | 25272590 | NM_001004365 | chr5  | 25270063 | 25270669 |
| 2  | 25239293 | 25253182 | NM_007379    | chr2  | 25247344 | 25248237 |
| 2  | 25188044 | 25196842 | AB197927     | chr2  | 25196205 | 25196807 |
| 2  | 25088508 | 25097007 | NM_175300    | chr2  | 25088837 | 25089666 |
| 7  | 25075964 | 25084484 | BC059093     | chr7  | 25078836 | 25079425 |
| 17 | 25070480 | 25079127 | NM_031187    | chr17 | 25072890 | 25073492 |
| 2  | 25044144 | 25052653 | NM_146116    | chr2  | 25046098 | 25047239 |
| 2  | 24996767 | 25005513 | NM_025980    | chr2  | 25002773 | 25003828 |
| 7  | 24985570 | 24994069 | NM_027882    | chr7  | 24993288 | 24993912 |
| 19 | 24965907 | 24974406 | NM_008022    | chr19 | 24967568 | 24968168 |
| 13 | 24942627 | 24951126 | NM_172532    | chr13 | 24949875 | 24950587 |
| 13 | 24944617 | 24953562 | NM_008156    | chr13 | 24949875 | 24950587 |
| 19 | 24926250 | 24934939 | NM_175013    | chr19 | 24927285 | 24928376 |
| 13 | 24833150 | 24841649 | NM_019551    | chr13 | 24837349 | 24837955 |
| 13 | 24836436 | 24844954 | NM_025790    | chr13 | 24837349 | 24837955 |
| 13 | 24803122 | 24813247 | NM_024473    | chr13 | 24811262 | 24812062 |
| 17 | 24806215 | 24814714 | NM_001001183 | chr17 | 24810649 | 24811461 |

|    |          |          |              |       |          |          |
|----|----------|----------|--------------|-------|----------|----------|
| 2  | 24765791 | 24774344 | NM_026021    | chr2  | 24771698 | 24772709 |
| 17 | 24600370 | 24626605 | NM_008340    | chr17 | 24613885 | 24614488 |
| 17 | 24611429 | 24619948 | NM_011956    | chr17 | 24613885 | 24614488 |
| 5  | 24607996 | 24616495 | NM_145401    | chr5  | 24610974 | 24611582 |
| 7  | 24587474 | 24595973 | NM_023133    | chr7  | 24593384 | 24594313 |
| 1  | 24539166 | 24547712 | NM_007733    | chr1  | 24540713 | 24541337 |
| 3  | 24518119 | 24526618 | BC056958     | chr3  | 24524845 | 24525517 |
| 3  | 24518119 | 24526618 | BC056958     | chr3  | 24522514 | 24523118 |
| 17 | 24441707 | 24450208 | NM_008503    | chr17 | 24450070 | 24450749 |
| 7  | 24430551 | 24440823 | NM_177593    | chr7  | 24438263 | 24438962 |
| 17 | 24414990 | 24429756 | NM_011522    | chr17 | 24423692 | 24424288 |
| 17 | 24417874 | 24428416 | NM_027988    | chr17 | 24423692 | 24424288 |
| 17 | 24414990 | 24429756 | NM_011522    | chr17 | 24422607 | 24423526 |
| 17 | 24417874 | 24428416 | NM_027988    | chr17 | 24422607 | 24423526 |
| 17 | 24414990 | 24429756 | NM_011522    | chr17 | 24420234 | 24420823 |
| 17 | 24417874 | 24428416 | NM_027988    | chr17 | 24420234 | 24420823 |
| 5  | 24416008 | 24424507 | AY348864     | chr5  | 24418418 | 24419096 |
| 18 | 24375251 | 24383750 | BC090962     | chr18 | 24380893 | 24381690 |
| 16 | 24302839 | 24311338 | NM_178665    | chr16 | 24309817 | 24310512 |
| 16 | 24302839 | 24311338 | NM_178665    | chr16 | 24306713 | 24307640 |
| 14 | 24286451 | 24295022 | NM_183208    | chr14 | 24291029 | 24292260 |
| 13 | 24285761 | 24294260 | NM_026825    | chr13 | 24287012 | 24288426 |
| 10 | 24278923 | 24287511 | NM_010217    | chr10 | 24284660 | 24285367 |
| 10 | 24278923 | 24287511 | NM_010217    | chr10 | 24281724 | 24282348 |
| 18 | 24262330 | 24270847 | NM_172625    | chr18 | 24264433 | 24265032 |
| 17 | 24252931 | 24267488 | NM_153792    | chr17 | 24258506 | 24259105 |
| 7  | 24233449 | 24241969 | NM_153134    | chr7  | 24239202 | 24239796 |
| 17 | 24203561 | 24212678 | NM_019988    | chr17 | 24204156 | 24205001 |
| 9  | 24171356 | 24179855 | BC116782     | chr9  | 24176491 | 24177107 |
| 17 | 24148283 | 24156782 | NM_010023    | chr17 | 24149546 | 24150171 |
| 5  | 24109467 | 24118077 | NM_025891    | chr5  | 24113520 | 24114383 |
| 5  | 24062976 | 24071475 | NM_177676    | chr5  | 24064997 | 24065627 |
| 1  | 23957416 | 23965915 | NM_026503    | chr1  | 23959365 | 23960239 |
| 5  | 23951936 | 23967772 | NM_023229    | chr5  | 23956775 | 23957607 |
| 13 | 23935927 | 23944426 | NM_175658    | chr13 | 23942137 | 23942746 |
| 13 | 23939122 | 23947621 | NM_175663    | chr13 | 23942137 | 23942746 |
| 6  | 23917563 | 23926062 | NM_207022    | chr6  | 23923374 | 23924116 |
| 13 | 23919973 | 23928474 | NM_177016    | chr13 | 23922891 | 23923504 |
| 2  | 23916062 | 23924604 | NM_199059    | chr2  | 23916819 | 23917227 |
| 5  | 23895369 | 23908208 | NM_001002897 | chr5  | 23902654 | 23903318 |
| 5  | 23897761 | 23906260 | NM_029020    | chr5  | 23902654 | 23903318 |
| 16 | 23891442 | 23899941 | U41465       | chr16 | 23896751 | 23897341 |
| 16 | 23891442 | 23899941 | U41465       | chr16 | 23895089 | 23895696 |
| 17 | 23876022 | 23884521 | AY062008     | chr17 | 23882708 | 23883345 |
| 7  | 23784684 | 23793213 | NM_001045486 | chr7  | 23790558 | 23791143 |
| 7  | 23705871 | 23714370 | NM_207619    | chr7  | 23713001 | 23713597 |
| 13 | 23685664 | 23694180 | NM_023422    | chr13 | 23691034 | 23691678 |



|    |          |          |              |       |          |          |
|----|----------|----------|--------------|-------|----------|----------|
| 13 | 23688925 | 23697945 | NM_178189    | chr13 | 23691034 | 23691678 |
| 11 | 23668471 | 23676970 | NM_009044    | chr11 | 23670616 | 23671412 |
| 7  | 23655174 | 23663673 | NM_206869    | chr7  | 23661163 | 23661812 |
| 7  | 23655174 | 23663673 | NM_206869    | chr7  | 23655412 | 23656036 |
| 7  | 23631146 | 23639645 | NM_207545    | chr7  | 23637646 | 23638227 |
| 8  | 23588087 | 23596598 | NM_177898    | chr8  | 23589986 | 23590602 |
| 13 | 23572861 | 23591566 | NM_178196    | chr13 | 23588732 | 23589530 |
| 13 | 23548325 | 23565111 | NM_178197    | chr13 | 23563759 | 23564333 |
| 13 | 23556499 | 23564999 | NM_145713    | chr13 | 23563759 | 23564333 |
| 13 | 23428812 | 23437331 | NM_013924    | chr13 | 23429721 | 23430579 |
| 8  | 23395756 | 23404255 | NM_139222    | chr8  | 23401421 | 23401807 |
| 8  | 23397897 | 23414835 | NM_139223    | chr8  | 23401421 | 23401807 |
| 17 | 23382142 | 23390641 | NM_153784    | chr17 | 23388016 | 23388806 |
| 7  | 23361076 | 23369575 | NM_030735    | chr7  | 23368323 | 23368932 |
| 17 | 23322478 | 23330979 | NM_001033425 | chr17 | 23328372 | 23329166 |
| 17 | 23324610 | 23333109 | NM_011747    | chr17 | 23328372 | 23329166 |
| 13 | 23238085 | 23246584 | NM_134240    | chr13 | 23242000 | 23242885 |
| 19 | 23195997 | 23210822 | NM_010638    | chr19 | 23203278 | 23203979 |
| 6  | 23195766 | 23204265 | BC119565     | chr6  | 23200012 | 23200836 |
| 6  | 23195766 | 23204265 | BC119565     | chr6  | 23197129 | 23198200 |
| 18 | 23179167 | 23190659 | NM_199024    | chr18 | 23186512 | 23187208 |
| 18 | 23179167 | 23190659 | NM_199024    | chr18 | 23181686 | 23182292 |
| 8  | 23166691 | 23175192 | NM_001007582 | chr8  | 23170169 | 23171157 |
| 2  | 23137255 | 23145784 | NM_008752    | chr2  | 23139797 | 23140399 |
| 14 | 23119829 | 23128328 | NM_001033214 | chr14 | 23127447 | 23128017 |
| 14 | 23119829 | 23128328 | NM_001033214 | chr14 | 23120684 | 23121282 |
| 13 | 23035803 | 23044302 | NM_134214    | chr13 | 23039141 | 23039757 |
| 13 | 23012714 | 23021213 | NM_134215    | chr13 | 23015132 | 23015647 |
| 2  | 22972545 | 22981054 | NM_013771    | chr2  | 22977324 | 22977913 |
| 2  | 22975410 | 22983925 | NM_025979    | chr2  | 22977324 | 22977913 |
| 9  | 22967478 | 22976472 | NM_028472    | chr9  | 22973197 | 22973901 |
| 8  | 22968801 | 22977300 | NM_183268    | chr8  | 22972986 | 22973666 |
| 11 | 22901531 | 22915886 | NM_028672    | chr11 | 22907838 | 22908439 |
| X  | 22516136 | 22528022 | NM_026167    | chrX  | 22521174 | 22521765 |
| 13 | 22476083 | 22484582 | NM_134221    | chr13 | 22479213 | 22479810 |
| 12 | 22450725 | 22459224 | NM_001004167 | chr12 | 22451752 | 22453118 |
| 10 | 22418205 | 22426794 | NM_011603    | chr10 | 22418686 | 22419275 |
| 16 | 22352327 | 22360874 | NM_023794    | chr16 | 22354367 | 22355088 |
| 18 | 22307048 | 22320406 | NM_027616    | chr18 | 22312424 | 22312987 |
| 13 | 22279782 | 22288281 | NM_134223    | chr13 | 22285587 | 22286205 |
| 6  | 22232231 | 22240767 | NM_053116    | chr6  | 22239165 | 22239844 |
| 11 | 22183342 | 22192798 | NM_153078    | chr11 | 22186416 | 22187129 |
| 13 | 22089343 | 22097842 | NM_145850    | chr13 | 22091834 | 22092524 |
| 13 | 22037352 | 22053194 | NM_175665    | chr13 | 22043066 | 22043782 |
| 13 | 22040518 | 22056414 | NM_175656    | chr13 | 22043066 | 22043782 |
| 5  | 21853898 | 21862529 | NM_011261    | chr5  | 21855898 | 21856861 |
| 13 | 21811920 | 21821748 | NM_178185    | chr13 | 21813636 | 21814130 |

|    |          |          |              |       |          |          |
|----|----------|----------|--------------|-------|----------|----------|
| 13 | 21785520 | 21800683 | NM_020034    | chr13 | 21798687 | 21799085 |
| 13 | 21785520 | 21800683 | NM_020034    | chr13 | 21794113 | 21794930 |
| 13 | 21788953 | 21797452 | NM_178202    | chr13 | 21794113 | 21794930 |
| 13 | 21717877 | 21732062 | NM_178206    | chr13 | 21729585 | 21730178 |
| 13 | 21721109 | 21735596 | NM_178199    | chr13 | 21729585 | 21730178 |
| 13 | 21717877 | 21732062 | NM_178206    | chr13 | 21723195 | 21724069 |
| 13 | 21721109 | 21735596 | NM_178199    | chr13 | 21723195 | 21724069 |
| 9  | 21703895 | 21719978 | NM_010149    | chr9  | 21711247 | 21711862 |
| 13 | 21679908 | 21688407 | NM_146543    | chr13 | 21682419 | 21683012 |
| 9  | 21663852 | 21674538 | NM_031874    | chr9  | 21672479 | 21673136 |
| 9  | 21671873 | 21680397 | NM_025977    | chr9  | 21672479 | 21673136 |
| 9  | 21663852 | 21674538 | NM_031874    | chr9  | 21666979 | 21667926 |
| 13 | 21560986 | 21569485 | NM_207572    | chr13 | 21564067 | 21564676 |
| 19 | 21537144 | 21545758 | NM_010266    | chr19 | 21544574 | 21545255 |
| 13 | 21445867 | 21462920 | NM_001013786 | chr13 | 21457262 | 21457876 |
| 13 | 21407667 | 21421413 | NM_023685    | chr13 | 21418097 | 21418689 |
| 13 | 21348395 | 21356894 | NM_146533    | chr13 | 21348756 | 21349099 |
| 9  | 21337124 | 21345623 | NM_178619    | chr9  | 21342452 | 21343257 |
| 9  | 21340649 | 21349174 | NM_138303    | chr9  | 21342452 | 21343257 |
| 19 | 21333375 | 21346023 | NM_009551    | chr19 | 21341281 | 21341894 |
| 5  | 21291107 | 21301088 | NM_011188    | chr5  | 21296396 | 21296983 |
| 5  | 21294443 | 21303016 | NM_009584    | chr5  | 21296396 | 21296983 |
| 5  | 21242972 | 21251483 | NM_028431    | chr5  | 21244547 | 21245243 |
| 17 | 21187682 | 21196184 | NM_013843    | chr17 | 21191986 | 21192883 |
| 9  | 21156245 | 21164744 | NM_021888    | chr9  | 21157655 | 21158242 |
| 5  | 21151637 | 21160365 | NM_026034    | chr5  | 21156785 | 21157685 |
| 5  | 21154930 | 21163429 | NM_177076    | chr5  | 21156785 | 21157685 |
| 16 | 21112777 | 21121277 | NM_010143    | chr16 | 21118953 | 21119560 |
| 13 | 21078265 | 21086764 | NM_146535    | chr13 | 21084755 | 21085353 |
| 13 | 21078265 | 21086764 | NM_146535    | chr13 | 21078274 | 21078961 |
| 9  | 20985660 | 21002611 | NM_016679    | chr9  | 20998531 | 20999176 |
| 17 | 20927523 | 20936022 | NM_134198    | chr17 | 20931897 | 20932895 |
| 9  | 20897809 | 20906348 | NM_016742    | chr9  | 20903160 | 20903834 |
| 18 | 20886123 | 20895414 | NM_019737    | chr18 | 20888914 | 20889597 |
| 5  | 20878497 | 20887026 | NM_008013    | chr5  | 20883047 | 20883701 |
| 10 | 20839903 | 20856400 | NM_010848    | chr10 | 20850117 | 20850777 |
| 13 | 20795578 | 20804099 | NM_012054    | chr13 | 20803513 | 20804091 |
| 14 | 20773831 | 20784153 | NM_145459    | chr14 | 20781106 | 20781722 |
| 14 | 20773831 | 20784153 | NM_145459    | chr14 | 20774477 | 20775102 |
| 16 | 20625385 | 20633884 | BC092087     | chr16 | 20631922 | 20632591 |
| 16 | 20627071 | 20635657 | NM_009900    | chr16 | 20631922 | 20632591 |
| 16 | 20602569 | 20611099 | NM_133778    | chr16 | 20605981 | 20606688 |
| 16 | 20580292 | 20588862 | NM_145941    | chr16 | 20586851 | 20587523 |
| 18 | 20573185 | 20581684 | NM_181564    | chr18 | 20574414 | 20575190 |
| 16 | 20497633 | 20506188 | NM_182636    | chr16 | 20503009 | 20503976 |
| 9  | 20476117 | 20484631 | NM_173777    | chr9  | 20477416 | 20478016 |
| 3  | 20464303 | 20472802 | NM_029706    | chr3  | 20471406 | 20471996 |

|   |    |          |                       |       |          |          |
|---|----|----------|-----------------------|-------|----------|----------|
|   | 2  | 20431565 | 20440064 BC050016     | chr2  | 20437872 | 20438611 |
|   | 9  | 20387263 | 20401169 NM_013911    | chr9  | 20394888 | 20395734 |
|   | 9  | 20387720 | 20405035 NM_023371    | chr9  | 20394888 | 20395734 |
|   | 17 | 20200996 | 20209495 NM_134194    | chr17 | 20204888 | 20205479 |
| X |    | 20105040 | 20113559 NM_007922    | chrX  | 20107340 | 20108357 |
|   | 11 | 20095442 | 20104104 NM_008996    | chr11 | 20097003 | 20097599 |
|   | 10 | 20031240 | 20039740 NM_027930    | chr10 | 20036891 | 20037487 |
|   | 11 | 19916630 | 19925129 BC030460     | chr11 | 19920579 | 19921257 |
| X |    | 19769154 | 19780513 NM_019435    | chrX  | 19775600 | 19776205 |
| X |    | 19770955 | 19779454 NM_145627    | chrX  | 19775600 | 19776205 |
|   | 13 | 19737917 | 19746416 NM_175688    | chr13 | 19745066 | 19745661 |
|   | 10 | 19538373 | 19546875 NM_029529    | chr10 | 19541741 | 19542735 |
|   | 16 | 19517730 | 19526229 NM_146957    | chr16 | 19523721 | 19524401 |
|   | 4  | 19480149 | 19488648 BC090632     | chr4  | 19485425 | 19485889 |
|   | 2  | 19469165 | 19477668 NM_027600    | chr2  | 19473917 | 19474619 |
|   | 5  | 19413596 | 19422184 AB029485     | chr5  | 19416246 | 19416915 |
|   | 10 | 19396003 | 19404518 NM_172786    | chr10 | 19400332 | 19400923 |
|   | 16 | 19394356 | 19402855 NM_147068    | chr16 | 19395640 | 19396258 |
|   | 3  | 19374261 | 19382894 NM_026182    | chr3  | 19379334 | 19380518 |
|   | 2  | 19357392 | 19372723 NM_018809    | chr2  | 19360973 | 19361560 |
|   | 7  | 19295111 | 19303610 NM_207547    | chr7  | 19299084 | 19299684 |
|   | 8  | 19233893 | 19250068 NM_001025351 | chr8  | 19246439 | 19247302 |
|   | 9  | 19241152 | 19249651 NM_146905    | chr9  | 19244265 | 19244854 |
|   | 8  | 19188334 | 19201182 NM_019728    | chr8  | 19194899 | 19195666 |
|   | 13 | 19186420 | 19194919 M54990       | chr13 | 19194085 | 19194877 |
|   | 8  | 19188334 | 19201182 NM_019728    | chr8  | 19192925 | 19193536 |
|   | 8  | 19134736 | 19143254 NM_001034905 | chr8  | 19138494 | 19139089 |
|   | 9  | 19123782 | 19132281 NM_146525    | chr9  | 19125722 | 19126326 |
|   | 9  | 19082864 | 19091363 NM_207145    | chr9  | 19090587 | 19091156 |
|   | 14 | 19077242 | 19085799 NM_026341    | chr14 | 19083124 | 19083871 |
|   | 16 | 18996524 | 19005063 M94350       | chr16 | 18998709 | 18999328 |
|   | 8  | 18946221 | 18956952 NM_176951    | chr8  | 18950746 | 18951344 |
|   | 15 | 18945705 | 18954204 BC055808     | chr15 | 18945787 | 18946403 |
|   | 7  | 18871142 | 18879939 NM_016871    | chr7  | 18874029 | 18874616 |
|   | 9  | 18619731 | 18628230 NM_146566    | chr9  | 18625719 | 18626465 |
|   | 2  | 18610755 | 18619275 NM_001001334 | chr2  | 18612710 | 18613316 |
|   | 8  | 18589150 | 18597649 NM_173189    | chr8  | 18595073 | 18595654 |
|   | 2  | 18584191 | 18597657 NM_007552    | chr2  | 18589907 | 18591095 |
|   | 7  | 18513738 | 18522267 NM_001010836 | chr7  | 18519583 | 18520548 |
|   | 7  | 18515442 | 18523954 NM_145822    | chr7  | 18519583 | 18520548 |
|   | 7  | 18513738 | 18522267 NM_001010836 | chr7  | 18515212 | 18515822 |
|   | 7  | 18515442 | 18523954 NM_145822    | chr7  | 18515212 | 18515822 |
|   | 9  | 18503612 | 18512111 NM_146606    | chr9  | 18505245 | 18505832 |
|   | 16 | 18235507 | 18244006 NM_138583    | chr16 | 18236050 | 18236676 |
|   | 16 | 18146200 | 18154699 NM_172151    | chr16 | 18148087 | 18148687 |
|   | 2  | 17976438 | 17984940 AF010135     | chr2  | 17982174 | 17983513 |
|   | 16 | 17974028 | 17982527 BC048503     | chr16 | 17976878 | 17977467 |

|    |          |          |              |       |          |          |
|----|----------|----------|--------------|-------|----------|----------|
| 16 | 17839232 | 17847736 | NM_153150    | chr16 | 17839358 | 17839984 |
| 16 | 17801766 | 17814776 | NM_009435    | chr16 | 17804275 | 17804911 |
| 16 | 17802687 | 17811234 | NM_010048    | chr16 | 17804275 | 17804911 |
| 4  | 17774629 | 17783313 | NM_019724    | chr4  | 17780459 | 17781126 |
| 7  | 17723328 | 17731827 | NM_001037168 | chr7  | 17723030 | 17723790 |
| 12 | 17710294 | 17718841 | NM_016677    | chr12 | 17716073 | 17716699 |
| 12 | 17710294 | 17718841 | NM_016677    | chr12 | 17715121 | 17715705 |
| 14 | 17684254 | 17692753 | NM_144839    | chr14 | 17690462 | 17691049 |
| 17 | 17586058 | 17594557 | NM_013521    | chr17 | 17588957 | 17589592 |
| 17 | 17586442 | 17599850 | NM_008039    | chr17 | 17588957 | 17589592 |
| 17 | 17528806 | 17538181 | NM_029205    | chr17 | 17537689 | 17538132 |
| 7  | 17510898 | 17519397 | NM_011963    | chr7  | 17516933 | 17517526 |
| 16 | 17487270 | 17496234 | NM_144852    | chr16 | 17487534 | 17488383 |
| 16 | 17397254 | 17407511 | NM_175178    | chr16 | 17404867 | 17405453 |
| 7  | 17329016 | 17337515 | NM_001003393 | chr7  | 17333400 | 17334001 |
| 7  | 17218449 | 17227012 | NM_026087    | chr7  | 17225394 | 17226333 |
| 6  | 17009193 | 17017723 | NM_011570    | chr6  | 17010646 | 17011241 |
| 16 | 16977786 | 16993837 | NM_023249    | chr16 | 16986645 | 16987347 |
| 18 | 16948987 | 16958264 | NM_007664    | chr18 | 16953806 | 16954542 |
| 11 | 16945587 | 16954436 | NM_029861    | chr11 | 16952118 | 16952741 |
| 11 | 16945587 | 16954436 | NM_029861    | chr11 | 16949092 | 16949868 |
| 12 | 16914670 | 16923169 | NM_009072    | chr12 | 16916127 | 16916733 |
| 19 | 16332155 | 16340654 | NM_018858    | chr19 | 16333121 | 16333962 |
| 7  | 16212655 | 16226910 | NM_016868    | chr7  | 16218721 | 16219315 |
| 19 | 16193850 | 16202809 | NM_008139    | chr19 | 16199436 | 16200793 |
| 1  | 15875437 | 15883936 | NM_001033288 | chr1  | 15877224 | 15878067 |
| 12 | 15838707 | 15848335 | NM_144551    | chr12 | 15846190 | 15847095 |
| 16 | 15794864 | 15803363 | NM_007679    | chr16 | 15802833 | 15803622 |
| 9  | 15622354 | 15630853 | NM_145712    | chr9  | 15629110 | 15629671 |
| 9  | 15454162 | 15462663 | NM_172289    | chr9  | 15459953 | 15460637 |
| 14 | 15365978 | 15374739 | NM_011243    | chr14 | 15368097 | 15368738 |
| 17 | 15077800 | 15086550 | NM_007865    | chr17 | 15079158 | 15079746 |
| 9  | 15050653 | 15060618 | NM_029248    | chr9  | 15056348 | 15057076 |
| 9  | 14983438 | 14991975 | NM_026955    | chr9  | 14987012 | 14988051 |
| 17 | 14709200 | 14717699 | NM_001039552 | chr17 | 14716690 | 14717291 |
| 17 | 14712520 | 14721125 | U21673       | chr17 | 14716690 | 14717291 |
| 17 | 14690938 | 14703808 | NM_024250    | chr17 | 14700607 | 14701251 |
| 14 | 14227273 | 14238140 | NM_146052    | chr14 | 14227264 | 14227956 |
| 10 | 14126197 | 14134696 | BC080779     | chr10 | 14129758 | 14130775 |
| 17 | 14010132 | 14018655 | NM_022315    | chr17 | 14015766 | 14016354 |
| 2  | 13985866 | 13994508 | NM_011484    | chr2  | 13989244 | 13989837 |
| 19 | 13980041 | 13988540 | NM_001011850 | chr19 | 13985986 | 13986842 |
| 8  | 13972158 | 13980667 | NM_173744    | chr8  | 13974803 | 13975401 |
| 8  | 13887746 | 13896248 | NM_025556    | chr8  | 13889943 | 13890553 |
| 8  | 13890280 | 13898779 | BC090258     | chr8  | 13889943 | 13890553 |
| 19 | 13860129 | 13868628 | NM_146741    | chr19 | 13861806 | 13862474 |
| 19 | 13841633 | 13850132 | NM_146989    | chr19 | 13847977 | 13848864 |

|          |    |          |          |              |             |          |          |
|----------|----|----------|----------|--------------|-------------|----------|----------|
|          | 19 | 13841633 | 13850132 | NM_146989    | chr19       | 13844763 | 13845463 |
|          | 8  | 13835850 | 13844349 | NM_153093    | chr8        | 13841272 | 13841878 |
|          | 19 | 13829326 | 13837825 | NM_146344    | chr19       | 13833438 | 13834022 |
|          | 8  | 13772979 | 13788091 | BC119035     | chr8        | 13778120 | 13778707 |
|          | 4  | 13705929 | 13714428 | NM_009822    | chr4        | 13708040 | 13709073 |
|          | 19 | 13694132 | 13702631 | NM_146635    | chr19       | 13702273 | 13702611 |
|          | 14 | 13652489 | 13660988 | NM_001034865 | chr14       | 13653939 | 13654536 |
|          | 19 | 13646325 | 13654824 | NM_146291    | chr19       | 13651896 | 13652770 |
|          | 6  | 13625467 | 13633966 | NM_175312    | chr6        | 13627903 | 13628507 |
|          | 19 | 13519035 | 13527534 | NM_146690    | chr19       | 13520406 | 13521120 |
|          | 8  | 13394255 | 13402802 | NM_009724    | chr8        | 13401916 | 13402508 |
|          | 8  | 13399058 | 13407577 | NM_011881    | chr8        | 13401916 | 13402508 |
|          | 19 | 13226035 | 13234534 | NM_146302    | chr19       | 13231898 | 13232581 |
|          | 13 | 13183244 | 13191743 | BC003212     | chr13       | 13188666 | 13189253 |
|          | 19 | 13014610 | 13023109 | NM_146371    | chr19       | 13019719 | 13020329 |
| X        |    | 13001016 | 13009515 | NM_009806    | chrX        | 13003276 | 13003874 |
|          | 12 | 12963950 | 12973694 | NM_008709    | chr12       | 12967057 | 12967784 |
|          | 12 | 12963950 | 12973694 | NM_008709    | chr12       | 12966146 | 12966762 |
|          | 19 | 12857212 | 12868161 | NM_134152    | chr19       | 12863136 | 12864053 |
|          | 19 | 12860642 | 12869141 | NM_053009    | chr19       | 12863136 | 12864053 |
|          | 10 | 12800894 | 12817556 | AF147785     | chr10       | 12815629 | 12816220 |
|          | 10 | 12800894 | 12817556 | AF147785     | chr10       | 12812559 | 12813316 |
|          | 10 | 12800894 | 12817556 | AF147785     | chr10       | 12806056 | 12806658 |
|          | 19 | 12735198 | 12755712 | NM_146698    | chr19       | 12738690 | 12739366 |
|          | 17 | 12708576 | 12717075 | NM_008552    | chr17       | 12709608 | 12710196 |
| X        |    | 12618631 | 12627131 | BC035244     | chrX        | 12618624 | 12619382 |
|          | 17 | 12578760 | 12587259 | BC009123     | chr17       | 12585594 | 12586715 |
|          | 17 | 12578760 | 12587259 | BC009123     | chr17       | 12582339 | 12582958 |
|          | 19 | 12483356 | 12497481 | NM_019540    | chr19       | 12489968 | 12490568 |
|          | 5  | 12383562 | 12392061 | NM_028882    | chr5        | 12389343 | 12389957 |
|          | 5  | 12383562 | 12392061 | NM_028882    | chr5        | 12387555 | 12388177 |
| X        |    | 12353520 | 12362019 | NM_013762    | chrX        | 12360637 | 12361777 |
|          | 19 | 12344089 | 12352594 | NM_207626    | chr19       | 12348678 | 12349274 |
|          | 7  | 12292311 | 12300873 | NM_013877    | chr7        | 12299490 | 12299948 |
|          | 19 | 12156393 | 12172682 | NM_146809    | chr19       | 12157797 | 12158415 |
|          | 7  | 11872027 | 11880526 | NM_175558    | chr7        | 11878594 | 11879193 |
|          | 6  | 11854910 | 11863450 | NM_010886    | chr6        | 11855430 | 11856309 |
| X        |    | 11828006 | 11836517 | NM_175141    | chrX        | 11830139 | 11830892 |
|          | 7  | 11816497 | 11830094 | NM_029809    | chr7        | 11825539 | 11826083 |
|          | 8  | 11633162 | 11641726 | NM_133971    | chr8        | 11635611 | 11636450 |
|          | 19 | 11597851 | 11606393 | NM_025658    | chr19       | 11602636 | 11603244 |
|          | 2  | 11554703 | 11563261 | NM_008367    | chr2        | 11559549 | 11560204 |
|          | 2  | 11554703 | 11563261 | NM_008367    | chr2        | 11554940 | 11555552 |
|          | 8  | 11476097 | 11484596 | NM_011227    | chr8        | 11478105 | 11478722 |
|          | 1  | 11393326 | 11401825 | NM_177173    | chr1        | 11399919 | 11400533 |
| Y_random |    | 11349402 | 11359374 | NM_023546    | chrY_random | 11354918 | 11355459 |
|          | 16 | 11313226 | 11321725 | NM_028964    | chr16       | 11314210 | 11314945 |

|          |          |          |              |             |          |          |
|----------|----------|----------|--------------|-------------|----------|----------|
| Y_random | 11275195 | 11283694 | NM_001017394 | chrY_random | 11281005 | 11281621 |
| 7        | 11266129 | 11274628 | NM_134233    | chr7        | 11267509 | 11268119 |
| 14       | 11136002 | 11145111 | NM_080433    | chr14       | 11139937 | 11140704 |
| 7        | 11052328 | 11060827 | NM_134208    | chr7        | 11057061 | 11057674 |
| 18       | 11046506 | 11056992 | NM_010258    | chr18       | 11050749 | 11051370 |
| 10       | 10965564 | 10974063 | NM_027968    | chr10       | 10971494 | 10972101 |
| 19       | 10801992 | 10810491 | NM_207529    | chr19       | 10805812 | 10806414 |
| 19       | 10749860 | 10758359 | NM_181403    | chr19       | 10755891 | 10756510 |
| 17       | 10681028 | 10689549 | NM_027032    | chr17       | 10681879 | 10682720 |
| 19       | 10666670 | 10675228 | NM_015735    | chr19       | 10670459 | 10671471 |
| 19       | 10668804 | 10677303 | NM_145496    | chr19       | 10670459 | 10671471 |
| 15       | 10655745 | 10664265 | NM_030690    | chr15       | 10659931 | 10660559 |
| X        | 10450183 | 10484020 | BC049545     | chrX        | 10478474 | 10479350 |
| X        | 10450183 | 10484020 | BC049545     | chrX        | 10471896 | 10472514 |
| X        | 10450183 | 10484020 | BC049545     | chrX        | 10468913 | 10469835 |
| X        | 10450183 | 10484020 | BC049545     | chrX        | 10456056 | 10456940 |
| 3        | 10418298 | 10428632 | NM_029068    | chr3        | 10421847 | 10422706 |
| 12       | 10389987 | 10398551 | NM_027588    | chr12       | 10393868 | 10394483 |
| 12       | 10389987 | 10398551 | NM_027588    | chr12       | 10392531 | 10393147 |
| 13       | 10357550 | 10366049 | NM_033269    | chr13       | 10363222 | 10363882 |
| 15       | 10270780 | 10279279 | BC096586     | chr15       | 10270617 | 10271213 |
| 15       | 10252888 | 10261420 | L13593       | chr15       | 10253033 | 10253675 |
| 3        | 10177255 | 10185754 | NM_011598    | chr3        | 10178379 | 10178981 |
| 17       | 10159745 | 10170497 | NM_021881    | chr17       | 10163075 | 10163875 |
| 14       | 9952763  | 9961286  | AF047699     | chr14       | 9954877  | 9955484  |
| 2        | 9793130  | 9801629  | NM_008091    | chr2        | 9798795  | 9799505  |
| 15       | 9472015  | 9480583  | NM_008372    | chr15       | 9473988  | 9474711  |
| 7        | 9453881  | 9462380  | NM_145842    | chr7        | 9454761  | 9455576  |
| 11       | 9195290  | 9203789  | AY160971     | chr11       | 9199021  | 9199707  |
| 13       | 9161607  | 9170106  | BC051459     | chr13       | 9162202  | 9162821  |
| 12       | 8993900  | 9002399  | NM_172470    | chr12       | 8993973  | 8994583  |
| 11       | 8942595  | 8951096  | NM_001037928 | chr11       | 8950187  | 8950788  |
| 11       | 8946409  | 8954994  | NM_177576    | chr11       | 8950187  | 8950788  |
| 19       | 8796884  | 8811364  | NM_019829    | chr19       | 8807543  | 8808438  |
| 4        | 8777917  | 8786416  | BC034239     | chr4        | 8779392  | 8780058  |
| 17       | 8633919  | 8642418  | NM_011866    | chr17       | 8638974  | 8639607  |
| 12       | 8523494  | 8532004  | NM_007483    | chr12       | 8526242  | 8526966  |
| X        | 8423763  | 8432372  | NM_023500    | chrX        | 8428991  | 8429797  |
| 12       | 8325463  | 8333962  | NM_013527    | chr12       | 8328543  | 8329142  |
| 17       | 8228803  | 8237302  | NM_013682    | chr17       | 8231269  | 8231887  |
| 10       | 8206516  | 8215015  | NM_177387    | chr10       | 8209270  | 8209856  |
| 6        | 8203444  | 8211949  | NM_133236    | chr6        | 8207634  | 8208067  |
| 6        | 8206614  | 8215113  | NM_026632    | chr6        | 8207634  | 8208067  |
| 19       | 8196528  | 8205027  | NM_001013820 | chr19       | 8201038  | 8201708  |
| 17       | 8172580  | 8181079  | NM_178774    | chr17       | 8177694  | 8178298  |
| 17       | 8143276  | 8151821  | NM_134114    | chr17       | 8148564  | 8149404  |
| X        | 8141132  | 8149631  | BC104363     | chrX        | 8146939  | 8147534  |

|   |    |         |                   |       |         |         |
|---|----|---------|-------------------|-------|---------|---------|
|   | 7  | 8137398 | 8145897 NM_009493 | chr7  | 8137551 | 8138222 |
|   | 9  | 7832972 | 7843585 NM_007465 | chr9  | 7840316 | 7840930 |
|   | 19 | 7671469 | 7680226 NM_019516 | chr19 | 7675646 | 7676170 |
|   | 19 | 7673614 | 7682133 NM_025731 | chr19 | 7675646 | 7676170 |
|   | 6  | 7640681 | 7649199 NM_012055 | chr6  | 7646595 | 7647192 |
|   | 6  | 7640681 | 7649199 NM_012055 | chr6  | 7641627 | 7642675 |
|   | 10 | 7612546 | 7621052 NM_138667 | chr10 | 7618426 | 7619005 |
|   | 7  | 7593143 | 7601643 NM_009489 | chr7  | 7599080 | 7600241 |
|   | 9  | 7458141 | 7466640 NM_032006 | chr9  | 7464500 | 7465251 |
| X |    | 7406736 | 7415365 NM_133991 | chrX  | 7414283 | 7414880 |
| X |    | 7406736 | 7415365 NM_133991 | chrX  | 7409477 | 7410039 |
|   | 3  | 7343677 | 7352242 NM_008862 | chr3  | 7351289 | 7351931 |
| X |    | 7347340 | 7356471 NM_007898 | chrX  | 7349062 | 7349849 |
| X |    | 7330641 | 7339140 NM_172478 | chrX  | 7332550 | 7333607 |
|   | 19 | 7294698 | 7303197 BC058212  | chr19 | 7294800 | 7295500 |
| X |    | 7286820 | 7295562 NM_026137 | chrX  | 7288485 | 7289253 |
| X |    | 7226930 | 7237599 NM_011514 | chrX  | 7227499 | 7228170 |
| X |    | 7070781 | 7079370 NM_013892 | chrX  | 7077576 | 7078210 |
|   | 19 | 7044975 | 7069081 NM_011697 | chr19 | 7056567 | 7057082 |
|   | 19 | 7036092 | 7044694 NM_008889 | chr19 | 7042880 | 7043489 |
| X |    | 7029265 | 7043783 NM_145737 | chrX  | 7036301 | 7037225 |
|   | 19 | 6970742 | 6979707 NM_026306 | chr19 | 6975142 | 6975631 |
|   | 19 | 6970742 | 6979707 NM_026306 | chr19 | 6973826 | 6974327 |
|   | 4  | 6915158 | 6923870 NM_145711 | chr4  | 6915812 | 6916414 |
|   | 14 | 6884122 | 6892621 NM_145458 | chr14 | 6890182 | 6891065 |
| X |    | 6873183 | 6888029 NM_172372 | chrX  | 6884251 | 6884865 |
| X |    | 6873183 | 6888029 NM_172372 | chrX  | 6878972 | 6879963 |
| X |    | 6759785 | 6768351 NM_138603 | chrX  | 6767422 | 6768136 |
|   | 18 | 6759203 | 6767710 NM_181070 | chr18 | 6760016 | 6760698 |
| X |    | 6728647 | 6745316 NM_054039 | chrX  | 6734552 | 6735290 |
|   | 15 | 6595101 | 6603602 BC083354  | chr15 | 6597878 | 6598677 |
|   | 19 | 6511177 | 6519676 BC060272  | chr19 | 6517348 | 6518014 |
|   | 15 | 6386548 | 6395047 NM_013485 | chr15 | 6387281 | 6388008 |
|   | 4  | 6378909 | 6387418 NM_010945 | chr4  | 6379845 | 6380959 |
|   | 11 | 6366372 | 6381920 NM_011221 | chr11 | 6369326 | 6369926 |
|   | 19 | 6357943 | 6366444 NM_011750 | chr19 | 6364947 | 6365551 |
|   | 10 | 6359875 | 6368374 BC030437  | chr10 | 6364126 | 6364773 |
|   | 19 | 6235668 | 6244226 NM_194348 | chr19 | 6242693 | 6243439 |
|   | 4  | 6200279 | 6208778 NM_007824 | chr4  | 6204886 | 6205493 |
|   | 1  | 6198743 | 6207242 NM_009826 | chr1  | 6204351 | 6205304 |
|   | 11 | 6165233 | 6180862 NM_026538 | chr11 | 6166041 | 6166787 |
|   | 17 | 6089226 | 6097725 NM_054040 | chr17 | 6088995 | 6089600 |
|   | 7  | 6082740 | 6098957 NM_146385 | chr7  | 6084719 | 6085307 |
|   | 18 | 6059438 | 6067937 BC024633  | chr18 | 6061657 | 6062267 |
|   | 18 | 6059438 | 6067937 BC024633  | chr18 | 6060588 | 6061158 |
|   | 2  | 6044907 | 6056844 NM_144883 | chr2  | 6046083 | 6047046 |
|   | 2  | 6015821 | 6024320 BC026904  | chr2  | 6017253 | 6018241 |

|    |         |                      |       |         |         |
|----|---------|----------------------|-------|---------|---------|
| 19 | 6011977 | 6021163 NM_007600    | chr19 | 6016134 | 6016627 |
| 10 | 5952433 | 5960932 NM_001033466 | chr10 | 5955671 | 5956285 |
| 5  | 5746448 | 5761317 NM_027399    | chr5  | 5756940 | 5757526 |
| 2  | 5756306 | 5765064 NM_016918    | chr2  | 5756416 | 5757009 |
| 5  | 5746448 | 5761317 NM_027399    | chr5  | 5754449 | 5755254 |
| 19 | 5698367 | 5706984 NM_010609    | chr19 | 5706304 | 5706947 |
| 7  | 5662802 | 5671301 NM_031389    | chr7  | 5663759 | 5664270 |
| 2  | 5629437 | 5637936 NM_177343    | chr2  | 5631433 | 5632075 |
| 19 | 5555052 | 5570573 NM_001033448 | chr19 | 5567608 | 5568198 |
| 19 | 5555052 | 5570573 NM_001033448 | chr19 | 5560021 | 5560641 |
| 19 | 5558058 | 5566646 NM_019935    | chr19 | 5560021 | 5560641 |
| 19 | 5555052 | 5570573 NM_001033448 | chr19 | 5557356 | 5557997 |
| 7  | 5404933 | 5414532 NM_030742    | chr7  | 5406238 | 5406834 |
| 17 | 5372695 | 5381249 NM_175349    | chr17 | 5377392 | 5377838 |
| 19 | 5360813 | 5369312 NM_027236    | chr19 | 5366442 | 5367057 |
| 19 | 5363848 | 5372651 NM_001038231 | chr19 | 5366442 | 5367057 |
| 9  | 5302860 | 5311373 NM_007609    | chr9  | 5304880 | 5305469 |
| 2  | 5212332 | 5220831 BC025011     | chr2  | 5215010 | 5215852 |
| 19 | 5142652 | 5151151 BC034670     | chr19 | 5148885 | 5149516 |
| 16 | 5045232 | 5053802 NM_008909    | chr16 | 5047348 | 5048065 |
| 19 | 5032826 | 5043909 NM_175383    | chr19 | 5034669 | 5035277 |
| 1  | 5007008 | 5015716 NM_021374    | chr1  | 5009174 | 5009771 |
| 11 | 4993441 | 5002667 NM_177370    | chr11 | 4998594 | 4999681 |
| 11 | 4996559 | 5005080 NM_007968    | chr11 | 4998594 | 4999681 |
| 19 | 4833415 | 4841914 NM_207268    | chr19 | 4840082 | 4840718 |
| 19 | 4836788 | 4845322 NM_016892    | chr19 | 4840082 | 4840718 |
| 16 | 4792526 | 4801046 BC064081     | chr16 | 4796328 | 4797464 |
| 5  | 4761478 | 4769977 NM_021457    | chr5  | 4765242 | 4765994 |
| 5  | 4761478 | 4769977 NM_021457    | chr5  | 4762756 | 4763468 |
| 12 | 4749571 | 4758070 NM_029107    | chr12 | 4753555 | 4754146 |
| 6  | 4691306 | 4699879 NM_130877    | chr6  | 4697830 | 4698634 |
| 6  | 4694538 | 4703100 NM_011360    | chr6  | 4697830 | 4698634 |
| 19 | 4612333 | 4621502 NM_153388    | chr19 | 4620971 | 4621461 |
| 11 | 4598681 | 4607180 NM_026015    | chr11 | 4600534 | 4601077 |
| 10 | 4516598 | 4525097 NM_175374    | chr10 | 4522110 | 4522902 |
| 16 | 4503941 | 4512622 NM_031184    | chr16 | 4510100 | 4510743 |
| 11 | 4492292 | 4500802 NM_028860    | chr11 | 4492556 | 4493144 |
| 7  | 4353490 | 4362181 NM_183405    | chr7  | 4355698 | 4356296 |
| 12 | 4349481 | 4357984 U64606       | chr12 | 4352277 | 4352930 |
| 19 | 4303456 | 4312014 NM_130863    | chr19 | 4305300 | 4305895 |
| 8  | 4273404 | 4281903 NM_011592    | chr8  | 4275547 | 4276142 |
| 12 | 4239070 | 4247926 NM_134046    | chr12 | 4240030 | 4240673 |
| 19 | 4225937 | 4234498 NM_027196    | chr19 | 4232026 | 4233015 |
| 8  | 4220827 | 4229326 NM_028175    | chr8  | 4226687 | 4227284 |
| 19 | 4208392 | 4216916 NM_019952    | chr19 | 4214244 | 4214847 |
| 5  | 4192373 | 4200891 NM_001042670 | chr5  | 4192477 | 4193086 |
| 19 | 4142663 | 4158371 NM_011778    | chr19 | 4150325 | 4151078 |



|           |         |         |              |              |         |         |
|-----------|---------|---------|--------------|--------------|---------|---------|
| 16        | 4126133 | 4134632 | NM_001025432 | chr16        | 4127740 | 4128337 |
| 19        | 4091351 | 4103627 | NM_008851    | chr19        | 4099798 | 4100446 |
| 4         | 4063087 | 4071592 | NM_001002927 | chr4         | 4065354 | 4065932 |
| 19        | 4035413 | 4048221 | NM_013541    | chr19        | 4035490 | 4036407 |
| 4         | 3944230 | 3952810 | NM_181989    | chr4         | 3948842 | 3949432 |
| 19        | 3921406 | 3935737 | NM_026316    | chr19        | 3928758 | 3929556 |
| 19        | 3929219 | 3946181 | NM_019449    | chr19        | 3928758 | 3929556 |
| 6         | 3915855 | 3924359 | NM_009364    | chr6         | 3917678 | 3918611 |
| 19        | 3902207 | 3918735 | NM_016921    | chr19        | 3915522 | 3916130 |
| 19        | 3902207 | 3918735 | NM_016921    | chr19        | 3903710 | 3904315 |
| 4         | 3898226 | 3906728 | BC080838     | chr4         | 3902705 | 3903365 |
| 11        | 3890912 | 3904959 | AB032939     | chr11        | 3898204 | 3898813 |
| 11        | 3890912 | 3904959 | AB032939     | chr11        | 3894218 | 3894792 |
| 8         | 3851787 | 3860308 | NM_130905    | chr8         | 3853494 | 3854085 |
| 4         | 3760235 | 3768747 | NM_026147    | chr4         | 3761928 | 3762544 |
| 7         | 3750355 | 3758959 | NM_175529    | chr7         | 3751966 | 3752559 |
| 16        | 3653331 | 3662020 | NM_148924    | chr16        | 3653705 | 3654358 |
| 5         | 3596072 | 3604571 | NM_027777    | chr5         | 3597098 | 3597842 |
| 13        | 3571939 | 3580853 | BC016423     | chr13        | 3574307 | 3575183 |
| 11        | 3544467 | 3562794 | BC057363     | chr11        | 3546839 | 3548000 |
| 13        | 3531321 | 3540014 | NM_008112    | chr13        | 3533964 | 3534587 |
| 8         | 3509384 | 3517924 | NM_015801    | chr8         | 3515209 | 3515912 |
| 6         | 3441999 | 3450498 | NM_178899    | chr6         | 3448772 | 3449408 |
| 6         | 3442400 | 3450952 | NM_024260    | chr6         | 3448772 | 3449408 |
| 6         | 3441999 | 3450498 | NM_178899    | chr6         | 3445419 | 3446071 |
| 6         | 3442400 | 3450952 | NM_024260    | chr6         | 3445419 | 3446071 |
| 2         | 3427515 | 3436086 | NM_015765    | chr2         | 3432583 | 3433175 |
| 11        | 3408705 | 3417536 | NM_053267    | chr11        | 3415596 | 3416187 |
| 2         | 3389733 | 3398236 | NM_022724    | chr2         | 3390676 | 3391285 |
| 18        | 3322978 | 3333517 | NM_013498    | chr18        | 3325248 | 3325903 |
| 11        | 3268880 | 3277395 | NM_173053    | chr11        | 3274180 | 3274783 |
| 11        | 3268880 | 3277395 | NM_173053    | chr11        | 3268918 | 3269674 |
| 7         | 3109463 | 3117962 | BC060682     | chr7         | 3115944 | 3116717 |
| 11        | 3042349 | 3050848 | BC048950     | chr11        | 3044205 | 3045366 |
| 11        | 3018018 | 3032526 | NM_001004146 | chr11        | 3026805 | 3028580 |
| Y         | 1946029 | 1954528 | NM_011564    | chrY         | 1951160 | 1951835 |
| 13_random | 120625  | 138341  | NM_145942    | chr13_random | 132403  | 133022  |
| 13_random | 120625  | 138341  | NM_145942    | chr13_random | 122578  | 123189  |
| 15_random | 4000    | 12528   | NM_009268    | chr15_random | 8067    | 8704    |

| gene overlap percent | region overlap percent | length(bps) | probes in region | p-value(region) |
|----------------------|------------------------|-------------|------------------|-----------------|
| 0.0357121            | 1                      | 595         | 17               | 0.00984269      |
| 0.0489767            | 1                      | 816         | 23               | 0.00634699      |
| 0.0893816            | 1                      | 782         | 22               | 0.00680602      |
| 0.0765444            | 1                      | 653         | 14               | 0.00885401      |
| 0.0821053            | 1                      | 702         | 14               | 0.00565844      |
| 0.0944246            | 1                      | 818         | 23               | 0.00504052      |
| 0.0710261            | 1                      | 605         | 17               | 0.00889815      |
| 0.0706776            | 1                      | 605         | 17               | 0.00889815      |
| 0.0714118            | 1                      | 607         | 13               | 0.00818312      |
| 0.109529             | 1                      | 931         | 19               | 0.00573789      |
| 0.0712941            | 1                      | 606         | 17               | 0.00863332      |
| 0.0384865            | 1                      | 593         | 14               | 0.0049081       |
| 0.0717647            | 1                      | 610         | 16               | 0.00798891      |
| 0.072627             | 1                      | 619         | 16               | 0.00867746      |
| 0.0515708            | 1                      | 806         | 19               | 0.00626754      |
| 0.0784678            | 1                      | 676         | 18               | 0.00913649      |
| 0.0749266            | 1                      | 638         | 14               | 0.00459914      |
| 0.0710588            | 1                      | 604         | 14               | 0.00595858      |
| 0.097219             | 1                      | 832         | 17               | 0.00798891      |
| 0.0677259            | 1                      | 601         | 17               | 0.00877456      |
| 0.106118             | 1                      | 902         | 23               | 0.00568493      |
| 0.0717647            | 1                      | 610         | 11               | 0.00980738      |
| 0.0765702            | 1                      | 651         | 18               | 0.0095249       |
| 0.0725712            | 1                      | 617         | 13               | 0.00922477      |
| 0.0724706            | 1                      | 616         | 14               | 0.00923359      |
| 0.0883               | 1                      | 763         | 15               | 0.00498755      |
| 0.0668305            | 1                      | 571         | 13               | 0.00576437      |
| 0.0411344            | 1                      | 380         | 11               | 0.00970145      |
| 0.0745153            | 1                      | 638         | 18               | 0.0072474       |
| 0.0692941            | 1                      | 589         | 17               | 0.0090747       |
| 0.079102             | 1                      | 673         | 18               | 0.00555251      |
| 0.0690585            | 1                      | 589         | 13               | 0.00930421      |
| 0.0705389            | 1                      | 606         | 10               | 0.00938366      |
| 0.0387825            | 1                      | 646         | 19               | 0.00576437      |
| 0.0707059            | 1                      | 601         | 17               | 0.00783884      |
| 0.0725359            | 1                      | 641         | 18               | 0.0089776       |
| 0.117348             | 1                      | 1037        | 27               | 0.00633817      |
| 0.086901             | 1                      | 749         | 21               | 0.00623224      |
| 0.0755807            | 1                      | 654         | 13               | 0.00849208      |
| 0.109987             | 1                      | 935         | 21               | 0.00899525      |
| 0.0499941            | 0.385662               | 1102        | 23               | 0.00529652      |
| 0.0705882            | 1                      | 600         | 17               | 0.00634699      |
| 0.0552291            | 0.76175                | 617         | 17               | 0.0083685       |
| 0.0725882            | 1                      | 617         | 17               | 0.0083685       |

|           |   |      |    |            |
|-----------|---|------|----|------------|
| 0.0735192 | 1 | 633  | 18 | 0.00918063 |
| 0.0724706 | 1 | 616  | 17 | 0.00924242 |
| 0.0406682 | 1 | 689  | 14 | 0.00896877 |
| 0.0757647 | 1 | 644  | 15 | 0.00588796 |
| 0.0888235 | 1 | 755  | 18 | 0.00642644 |
| 0.070054  | 1 | 597  | 17 | 0.00982504 |
| 0.129294  | 1 | 1099 | 31 | 0.00563196 |
| 0.0475725 | 1 | 828  | 23 | 0.0099398  |
| 0.0735243 | 1 | 639  | 13 | 0.00728271 |
| 0.070993  | 1 | 617  | 11 | 0.00984269 |
| 0.0608337 | 1 | 988  | 28 | 0.00514645 |
| 0.0721176 | 1 | 613  | 17 | 0.00961318 |
| 0.0981176 | 1 | 834  | 18 | 0.0065412  |
| 0.0690588 | 1 | 587  | 17 | 0.00882753 |
| 0.0905882 | 1 | 770  | 20 | 0.00486397 |
| 0.130588  | 1 | 1110 | 29 | 0.00635582 |
| 0.0954118 | 1 | 811  | 20 | 0.00602037 |
| 0.0842056 | 1 | 716  | 18 | 0.00515528 |
| 0.0937244 | 1 | 802  | 21 | 0.0039459  |
| 0.12616   | 1 | 1074 | 28 | 0.0054201  |
| 0.0443457 | 1 | 589  | 13 | 0.00756519 |
| 0.0613031 | 1 | 589  | 13 | 0.00756519 |
| 0.105412  | 1 | 896  | 25 | 0.00981621 |
| 0.0887068 | 1 | 758  | 21 | 0.00950725 |
| 0.0855471 | 1 | 731  | 21 | 0.00844794 |
| 0.0817035 | 1 | 706  | 20 | 0.00837732 |
| 0.0758266 | 1 | 649  | 18 | 0.00676189 |
| 0.0525388 | 1 | 447  | 12 | 0.00895994 |
| 0.0407978 | 1 | 673  | 17 | 0.00693844 |
| 0.0498824 | 1 | 424  | 11 | 0.00911001 |
| 0.0691223 | 1 | 593  | 17 | 0.0095867  |
| 0.0709753 | 1 | 604  | 17 | 0.00675306 |
| 0.0722353 | 1 | 614  | 16 | 0.00741512 |
| 0.0722353 | 1 | 614  | 16 | 0.00741512 |
| 0.0714118 | 1 | 607  | 14 | 0.00911884 |
| 0.0664706 | 1 | 565  | 16 | 0.00873925 |
| 0.12838   | 1 | 1111 | 25 | 0.00585265 |
| 0.115059  | 1 | 978  | 26 | 0.00932187 |
| 0.11491   | 1 | 978  | 26 | 0.00932187 |
| 0.0849412 | 1 | 722  | 20 | 0.00529652 |
| 0.113293  | 1 | 1004 | 28 | 0.0043608  |
| 0.072316  | 1 | 617  | 14 | 0.00932187 |
| 0.0724434 | 1 | 617  | 14 | 0.00932187 |
| 0.0709412 | 1 | 603  | 14 | 0.00682368 |
| 0.0716471 | 1 | 609  | 17 | 0.00992214 |
| 0.0664025 | 1 | 620  | 18 | 0.00765347 |
| 0.0704706 | 1 | 599  | 17 | 0.00900408 |

|           |          |     |    |            |
|-----------|----------|-----|----|------------|
| 0.0705882 | 1        | 600 | 16 | 0.00834201 |
| 0.103882  | 1        | 883 | 23 | 0.00443142 |
| 0.0791046 | 1        | 728 | 20 | 0.0060292  |
| 0.086     | 1        | 731 | 21 | 0.00560548 |
| 0.0822571 | 1        | 707 | 20 | 0.00559665 |
| 0.0231465 | 0.309748 | 636 | 17 | 0.00986035 |
| 0.0709505 | 1        | 636 | 17 | 0.00986035 |
| 0.0818824 | 1        | 696 | 20 | 0.0082096  |
| 0.0397811 | 1        | 349 | 10 | 0.00986035 |
| 0.0637647 | 0.903333 | 600 | 17 | 0.00895111 |
| 0.0705882 | 1        | 600 | 17 | 0.00895111 |
| 0.101412  | 1        | 862 | 24 | 0.005067   |
| 0.0851765 | 1        | 724 | 21 | 0.00974559 |
| 0.0673575 | 1        | 611 | 15 | 0.00787415 |
| 0.0671872 | 1        | 611 | 15 | 0.00787415 |
| 0.07213   | 1        | 617 | 10 | 0.00643527 |
| 0.0890169 | 1        | 757 | 19 | 0.00619692 |
| 0.107882  | 1        | 917 | 18 | 0.00411363 |
| 0.0824189 | 1        | 706 | 20 | 0.00912766 |
| 0.07972   | 1        | 706 | 20 | 0.00912766 |
| 0.08253   | 1        | 702 | 16 | 0.00530534 |
| 0.0704866 | 1        | 604 | 17 | 0.00812133 |
| 0.0682773 | 1        | 585 | 15 | 0.00991331 |
| 0.0715453 | 1        | 613 | 13 | 0.00695609 |
| 0.111882  | 1        | 951 | 27 | 0.00442259 |
| 0.0488567 | 1        | 594 | 17 | 0.00999276 |
| 0.0827651 | 1        | 704 | 20 | 0.00640879 |
| 0.0626953 | 1        | 642 | 18 | 0.00697375 |
| 0.0847854 | 1        | 725 | 18 | 0.00922477 |
| 0.0853859 | 1        | 728 | 15 | 0.00459914 |
| 0.0722496 | 1        | 616 | 18 | 0.00919828 |
| 0.0738916 | 1        | 630 | 11 | 0.00425487 |
| 0.0768147 | 1        | 654 | 16 | 0.00782119 |
| 0.0690588 | 1        | 587 | 17 | 0.00990449 |
| 0.0620512 | 1        | 942 | 25 | 0.00569376 |
| 0.0812397 | 1        | 692 | 20 | 0.00659416 |
| 0.104269  | 1        | 889 | 25 | 0.00572907 |
| 0.0729371 | 1        | 632 | 18 | 0.00885401 |
| 0.0707422 | 1        | 611 | 16 | 0.00680602 |
| 0.0680174 | 1        | 611 | 17 | 0.00657651 |
| 0.0730588 | 1        | 621 | 17 | 0.0064794  |
| 0.0728788 | 1        | 621 | 17 | 0.0064794  |
| 0.060241  | 1        | 630 | 17 | 0.00824491 |
| 0.0837543 | 1        | 713 | 20 | 0.00549955 |
| 0.0722353 | 1        | 614 | 12 | 0.0095867  |
| 0.0654588 | 1        | 560 | 13 | 0.00885401 |
| 0.0888498 | 1        | 757 | 15 | 0.00454618 |

|           |          |      |    |            |
|-----------|----------|------|----|------------|
| 0.0525326 | 1        | 447  | 11 | 0.00738864 |
| 0.0808531 | 1        | 690  | 20 | 0.00984269 |
| 0.0612842 | 1        | 838  | 22 | 0.00573789 |
| 0.0690588 | 1        | 587  | 17 | 0.0083685  |
| 0.0695294 | 1        | 591  | 16 | 0.00617927 |
| 0.0735294 | 1        | 625  | 18 | 0.00629403 |
| 0.0263034 | 0.379661 | 590  | 17 | 0.00858918 |
| 0.0647059 | 1        | 550  | 16 | 0.00873042 |
| 0.0931735 | 1        | 793  | 21 | 0.00468742 |
| 0.0894891 | 1        | 762  | 21 | 0.00492576 |
| 0.119646  | 1        | 1042 | 26 | 0.00566727 |
| 0.107647  | 1        | 915  | 15 | 0.00865981 |
| 0.0766612 | 1        | 653  | 17 | 0.00498755 |
| 0.0997897 | 1        | 854  | 24 | 0.00617044 |
| 0.130695  | 1        | 1113 | 31 | 0.00486397 |
| 0.109326  | 1        | 932  | 26 | 0.00782119 |
| 0.0923529 | 1        | 785  | 22 | 0.00995745 |
| 0.0396556 | 1        | 525  | 14 | 0.00895111 |
| 0.0698824 | 1        | 594  | 17 | 0.00923359 |
| 0.0738824 | 1        | 628  | 18 | 0.00723857 |
| 0.0594482 | 0.737822 | 698  | 19 | 0.00450204 |
| 0.0948863 | 1        | 822  | 22 | 0.00554369 |
| 0.0676471 | 1        | 575  | 16 | 0.00864215 |
| 0.103315  | 1        | 882  | 25 | 0.00519941 |
| 0.103765  | 1        | 882  | 25 | 0.00519941 |
| 0.0692082 | 1        | 590  | 10 | 0.00924242 |
| 0.0769231 | 1        | 654  | 18 | 0.00868629 |
| 0.0711765 | 1        | 605  | 10 | 0.00904822 |
| 0.0763529 | 1        | 649  | 18 | 0.00619692 |
| 0.0634874 | 1        | 651  | 14 | 0.00616161 |
| 0.0739136 | 1        | 631  | 18 | 0.00589679 |
| 0.0601176 | 1        | 511  | 10 | 0.00964849 |
| 0.0573508 | 1        | 520  | 15 | 0.00630285 |
| 0.0722255 | 1        | 615  | 16 | 0.00991331 |
| 0.0549009 | 1        | 615  | 16 | 0.00991331 |
| 0.0944706 | 1        | 803  | 15 | 0.00428135 |
| 0.0401176 | 0.424658 | 803  | 15 | 0.00428135 |
| 0.0475702 | 1        | 557  | 11 | 0.00688547 |
| 0.075304  | 1        | 644  | 18 | 0.00999276 |
| 0.0614701 | 1        | 526  | 15 | 0.0095249  |
| 0.0698741 | 1        | 594  | 13 | 0.00586148 |
| 0.0499195 | 1        | 620  | 18 | 0.00946311 |
| 0.0383283 | 1        | 653  | 18 | 0.00564079 |
| 0.0457612 | 1        | 529  | 15 | 0.00936601 |
| 0.0310501 | 1        | 529  | 15 | 0.00936601 |
| 0.0587059 | 1        | 499  | 14 | 0.0074063  |
| 0.0853687 | 1        | 734  | 21 | 0.00615279 |

|           |          |      |    |            |
|-----------|----------|------|----|------------|
| 0.0914118 | 1        | 777  | 22 | 0.00640879 |
| 0.0416197 | 1        | 664  | 19 | 0.00528769 |
| 0.0759732 | 1        | 646  | 19 | 0.00986918 |
| 0.0690345 | 1        | 587  | 17 | 0.00919828 |
| 0.0684309 | 1        | 587  | 17 | 0.00919828 |
| 0.0324591 | 0.463866 | 595  | 13 | 0.00777705 |
| 0.0386965 | 1        | 608  | 17 | 0.00991331 |
| 0.0476706 | 1        | 749  | 20 | 0.00563196 |
| 0.06922   | 1        | 591  | 15 | 0.009878   |
| 0.109755  | 1        | 935  | 20 | 0.00814781 |
| 0.0725589 | 1        | 619  | 16 | 0.00844794 |
| 0.0760125 | 1        | 655  | 18 | 0.00624989 |
| 0.0702237 | 1        | 612  | 17 | 0.0085627  |
| 0.096     | 1        | 816  | 23 | 0.0060292  |
| 0.0761257 | 1        | 705  | 20 | 0.00615279 |
| 0.0418259 | 1        | 602  | 12 | 0.00880104 |
| 0.107529  | 1        | 914  | 25 | 0.00514645 |
| 0.0672886 | 1        | 577  | 13 | 0.00920711 |
| 0.0196535 | 0.540728 | 577  | 13 | 0.00920711 |
| 0.0675086 | 1        | 588  | 17 | 0.00831553 |
| 0.0695971 | 1        | 988  | 26 | 0.00868629 |
| 0.0953108 | 1        | 811  | 23 | 0.005323   |
| 0.0922353 | 1        | 784  | 22 | 0.00759167 |
| 0.0455294 | 1        | 387  | 11 | 0.00970145 |
| 0.0727059 | 1        | 618  | 13 | 0.00514645 |
| 0.0742353 | 1        | 631  | 17 | 0.00961318 |
| 0.0780172 | 1        | 746  | 19 | 0.00655003 |
| 0.0815729 | 1        | 780  | 22 | 0.00637347 |
| 0.0887532 | 1        | 756  | 21 | 0.00551721 |
| 0.122941  | 1        | 1045 | 28 | 0.0059321  |
| 0.094     | 1        | 799  | 20 | 0.00397239 |
| 0.0702353 | 1        | 597  | 17 | 0.00979856 |
| 0.0783529 | 1        | 666  | 13 | 0.00643527 |
| 0.0882353 | 1        | 780  | 20 | 0.00547307 |
| 0.0716131 | 1        | 610  | 10 | 0.00754754 |
| 0.0707328 | 1        | 610  | 10 | 0.00754754 |
| 0.0807059 | 1        | 686  | 18 | 0.00843912 |
| 0.0651765 | 1        | 554  | 16 | 0.00990449 |
| 0.0943529 | 1        | 802  | 23 | 0.00984269 |
| 0.0398082 | 1        | 523  | 15 | 0.0065412  |
| 0.061141  | 1        | 523  | 15 | 0.0065412  |
| 0.131585  | 1        | 1119 | 30 | 0.00492576 |
| 0.110395  | 1        | 976  | 21 | 0.00636465 |
| 0.154941  | 1        | 1317 | 37 | 0.0099398  |
| 0.0915385 | 1        | 780  | 21 | 0.00660299 |
| 0.0913884 | 1        | 780  | 21 | 0.00660299 |
| 0.0887125 | 1        | 760  | 19 | 0.00585265 |

|           |   |      |    |            |
|-----------|---|------|----|------------|
| 0.0841176 | 1 | 715  | 20 | 0.00554369 |
| 0.0523323 | 1 | 451  | 12 | 0.00971028 |
| 0.037603  | 1 | 598  | 17 | 0.0068943  |
| 0.0541876 | 1 | 680  | 17 | 0.00840381 |
| 0.0774118 | 1 | 658  | 16 | 0.00948959 |
| 0.113176  | 1 | 962  | 23 | 0.00605568 |
| 0.0714118 | 1 | 607  | 16 | 0.0073445  |
| 0.0695941 | 1 | 607  | 16 | 0.0073445  |
| 0.0694232 | 1 | 591  | 17 | 0.00737099 |
| 0.0694395 | 1 | 591  | 17 | 0.00867746 |
| 0.0718809 | 1 | 613  | 16 | 0.009878   |
| 0.0574118 | 1 | 488  | 14 | 0.00732685 |
| 0.0689412 | 1 | 586  | 16 | 0.00981621 |
| 0.0710588 | 1 | 604  | 17 | 0.00695609 |
| 0.100165  | 1 | 852  | 24 | 0.00913649 |
| 0.0955294 | 1 | 812  | 17 | 0.0060292  |
| 0.0792941 | 1 | 674  | 19 | 0.0065412  |
| 0.112259  | 1 | 967  | 27 | 0.00542893 |
| 0.0705775 | 1 | 616  | 17 | 0.00954256 |
| 0.0992941 | 1 | 844  | 24 | 0.00623224 |
| 0.0675985 | 1 | 590  | 15 | 0.00923359 |
| 0.0719737 | 1 | 613  | 17 | 0.00753871 |
| 0.0722353 | 1 | 614  | 17 | 0.00652354 |
| 0.0685399 | 1 | 583  | 11 | 0.00828022 |
| 0.06726   | 1 | 597  | 17 | 0.00715913 |
| 0.0884407 | 1 | 785  | 21 | 0.00502286 |
| 0.0889412 | 1 | 756  | 21 | 0.00935718 |
| 0.119647  | 1 | 1017 | 28 | 0.00983387 |
| 0.119647  | 1 | 1017 | 28 | 0.00983387 |
| 0.0722807 | 1 | 618  | 12 | 0.00888049 |
| 0.0525511 | 1 | 447  | 13 | 0.00885401 |
| 0.0938086 | 1 | 850  | 17 | 0.00626754 |
| 0.0686286 | 1 | 590  | 17 | 0.00976324 |
| 0.0711769 | 1 | 606  | 16 | 0.00648823 |
| 0.110406  | 1 | 940  | 26 | 0.00446673 |
| 0.109882  | 1 | 934  | 25 | 0.00527003 |
| 0.0844452 | 1 | 1038 | 29 | 0.00422839 |
| 0.102048  | 1 | 872  | 25 | 0.00603803 |
| 0.105294  | 1 | 895  | 25 | 0.00441376 |
| 0.056962  | 1 | 756  | 22 | 0.00821843 |
| 0.072738  | 1 | 619  | 17 | 0.00918063 |
| 0.0161745 | 1 | 603  | 16 | 0.00730036 |
| 0.0911765 | 1 | 775  | 15 | 0.00504052 |
| 0.0958056 | 1 | 820  | 23 | 0.00759167 |
| 0.0651982 | 1 | 592  | 17 | 0.00564079 |
| 0.0730376 | 1 | 629  | 18 | 0.00589679 |
| 0.0812941 | 1 | 691  | 16 | 0.00571141 |

|            |           |     |    |            |
|------------|-----------|-----|----|------------|
| 0.0702353  | 1         | 597 | 15 | 0.00684133 |
| 0.0710038  | 1         | 609 | 17 | 0.00982504 |
| 0.0732037  | 1         | 704 | 20 | 0.00629403 |
| 0.0803785  | 1         | 773 | 22 | 0.00623224 |
| 0.054064   | 1         | 586 | 16 | 0.00826257 |
| 0.0670726  | 1         | 727 | 20 | 0.00486397 |
| 0.0723529  | 1         | 615 | 17 | 0.00694727 |
| 0.0573147  | 1         | 610 | 13 | 0.00427252 |
| 0.0695294  | 1         | 591 | 17 | 0.00905704 |
| 0.0832648  | 1         | 709 | 20 | 0.00819195 |
| 0.0582616  | 1         | 982 | 27 | 0.00615279 |
| 0.0764899  | 1         | 652 | 18 | 0.00624989 |
| 0.0765348  | 1         | 652 | 18 | 0.00624989 |
| 0.0948235  | 1         | 806 | 22 | 0.00482866 |
| 0.0795268  | 1         | 679 | 14 | 0.00966614 |
| 0.108302   | 1         | 921 | 25 | 0.00475804 |
| 0.0711765  | 1         | 605 | 13 | 0.00399004 |
| 0.0761176  | 1         | 647 | 16 | 0.00961318 |
| 0.0721984  | 1         | 623 | 16 | 0.00655003 |
| 0.06838    | 1         | 596 | 11 | 0.0070532  |
| 0.0722353  | 1         | 614 | 17 | 0.00966614 |
| 0.0843388  | 1         | 720 | 20 | 0.00887167 |
| 0.0714118  | 1         | 607 | 17 | 0.00834201 |
| 0.0719467  | 1         | 615 | 13 | 0.00919828 |
| 0.0687389  | 1         | 659 | 17 | 0.00531417 |
| 0.086      | 1         | 731 | 19 | 0.00653237 |
| 0.0934288  | 1         | 809 | 22 | 0.00651472 |
| 0.0401334  | 1         | 746 | 19 | 0.00554369 |
| 0.0531886  | 1         | 588 | 16 | 0.00762698 |
| 0.0184662  | 0.271157  | 579 | 11 | 0.00946311 |
| 0.0740924  | 1         | 749 | 20 | 0.00648823 |
| 0.0793937  | 1         | 749 | 20 | 0.00648823 |
| 0.0506479  | 1         | 512 | 13 | 0.0064441  |
| 0.0542718  | 1         | 512 | 13 | 0.0064441  |
| 0.104812   | 1         | 893 | 25 | 0.00568493 |
| 0.00164396 | 0.0336538 | 624 | 18 | 0.0077594  |
| 0.116189   | 1         | 989 | 28 | 0.00594975 |
| 0.069632   | 1         | 598 | 17 | 0.0064794  |
| 0.105294   | 1         | 895 | 24 | 0.00529652 |
| 0.0705662  | 1         | 602 | 14 | 0.00847443 |
| 0.0897119  | 1         | 763 | 22 | 0.00932187 |
| 0.0922798  | 1         | 814 | 22 | 0.00636465 |
| 0.0404422  | 1         | 611 | 14 | 0.00498755 |
| 0.100667   | 1         | 860 | 21 | 0.005323   |
| 0.0823267  | 1         | 702 | 17 | 0.00623224 |
| 0.106235   | 1         | 903 | 25 | 0.00422839 |
| 0.0718824  | 1         | 611 | 16 | 0.00939249 |



|           |   |      |    |            |
|-----------|---|------|----|------------|
| 0.0832057 | 1 | 1032 | 25 | 0.00478452 |
| 0.0735274 | 1 | 1051 | 28 | 0.00639996 |
| 0.0501609 | 1 | 717  | 21 | 0.00428135 |
| 0.0757841 | 1 | 650  | 18 | 0.0077594  |
| 0.0703529 | 1 | 598  | 17 | 0.00965731 |
| 0.0717715 | 1 | 613  | 17 | 0.00853622 |
| 0.0694118 | 1 | 590  | 15 | 0.00932187 |
| 0.0506951 | 1 | 795  | 23 | 0.00643527 |
| 0.0695489 | 1 | 592  | 17 | 0.00737099 |
| 0.074     | 1 | 629  | 17 | 0.00911884 |
| 0.0396333 | 1 | 441  | 13 | 0.00981621 |
| 0.0514406 | 1 | 441  | 13 | 0.00981621 |
| 0.0831778 | 1 | 713  | 20 | 0.00660299 |
| 0.0708328 | 1 | 603  | 11 | 0.00910118 |
| 0.0802353 | 1 | 682  | 20 | 0.00745926 |
| 0.0971765 | 1 | 826  | 23 | 0.00545541 |
| 0.139824  | 1 | 1271 | 35 | 0.00531417 |
| 0.0481565 | 1 | 751  | 20 | 0.00495224 |
| 0.0946406 | 1 | 807  | 23 | 0.00609982 |
| 0.156425  | 1 | 1339 | 37 | 0.00647058 |
| 0.0834947 | 1 | 776  | 22 | 0.00510231 |
| 0.131013  | 1 | 1114 | 29 | 0.00504052 |
| 0.0732874 | 1 | 628  | 16 | 0.00579086 |
| 0.101765  | 1 | 865  | 17 | 0.00565844 |
| 0.0603862 | 1 | 516  | 15 | 0.00863332 |
| 0.0361844 | 1 | 591  | 17 | 0.00901291 |
| 0.0933239 | 1 | 794  | 22 | 0.00604686 |
| 0.107714  | 1 | 916  | 22 | 0.00631168 |
| 0.0860859 | 1 | 748  | 17 | 0.00491693 |
| 0.0965882 | 1 | 821  | 23 | 0.00531417 |
| 0.0638171 | 1 | 748  | 21 | 0.009622   |
| 0.088     | 1 | 748  | 21 | 0.009622   |
| 0.08344   | 1 | 978  | 26 | 0.00498755 |
| 0.115059  | 1 | 978  | 26 | 0.00498755 |
| 0.0595048 | 1 | 596  | 17 | 0.00845677 |
| 0.102118  | 1 | 868  | 25 | 0.00659416 |
| 0.0722353 | 1 | 614  | 10 | 0.00835967 |
| 0.0390364 | 1 | 619  | 16 | 0.00761816 |
| 0.0394413 | 1 | 658  | 19 | 0.00609982 |
| 0.0466485 | 1 | 753  | 22 | 0.00986035 |
| 0.0897647 | 1 | 763  | 18 | 0.0044579  |
| 0.0372594 | 1 | 571  | 17 | 0.00620575 |
| 0.0591803 | 1 | 927  | 26 | 0.00866863 |
| 0.0435753 | 1 | 605  | 17 | 0.0090747  |
| 0.0517862 | 1 | 719  | 20 | 0.00504935 |
| 0.0765882 | 1 | 651  | 17 | 0.00899525 |
| 0.0742353 | 1 | 631  | 18 | 0.00956021 |

|           |   |     |    |            |
|-----------|---|-----|----|------------|
| 0.0718824 | 1 | 611 | 16 | 0.00949842 |
| 0.0483572 | 1 | 808 | 23 | 0.005835   |
| 0.0709761 | 1 | 605 | 16 | 0.00933952 |
| 0.0942353 | 1 | 801 | 20 | 0.00604686 |
| 0.0827059 | 1 | 703 | 20 | 0.00999276 |
| 0.0745882 | 1 | 634 | 18 | 0.00810367 |
| 0.0668495 | 1 | 658 | 19 | 0.00780354 |
| 0.0380846 | 1 | 614 | 10 | 0.00977207 |
| 0.0808235 | 1 | 687 | 16 | 0.00486397 |
| 0.0356586 | 1 | 595 | 16 | 0.00561431 |
| 0.0667851 | 1 | 639 | 18 | 0.0069914  |
| 0.0345091 | 1 | 587 | 17 | 0.00945428 |
| 0.064153  | 1 | 587 | 17 | 0.00945428 |
| 0.067195  | 1 | 585 | 16 | 0.00825374 |
| 0.0941176 | 1 | 800 | 19 | 0.00973676 |
| 0.08      | 1 | 680 | 19 | 0.00868629 |
| 0.0744979 | 1 | 638 | 16 | 0.00995745 |
| 0.0685954 | 1 | 588 | 16 | 0.00756519 |
| 0.0723529 | 1 | 615 | 10 | 0.00640879 |
| 0.0719298 | 1 | 615 | 10 | 0.00640879 |
| 0.0689412 | 1 | 586 | 16 | 0.00759167 |
| 0.0394183 | 1 | 618 | 16 | 0.00745926 |
| 0.0690747 | 1 | 589 | 17 | 0.00864215 |
| 0.0446153 | 1 | 766 | 21 | 0.00888049 |
| 0.112077  | 1 | 954 | 22 | 0.00521707 |
| 0.0718057 | 1 | 612 | 17 | 0.00617044 |
| 0.071202  | 1 | 606 | 17 | 0.00956021 |
| 0.0715371 | 1 | 942 | 27 | 0.00777705 |
| 0.108706  | 1 | 924 | 21 | 0.00409597 |
| 0.0278623 | 1 | 586 | 13 | 0.00828905 |
| 0.0764623 | 1 | 651 | 18 | 0.00609099 |
| 0.0693777 | 1 | 592 | 11 | 0.00971028 |
| 0.0691028 | 1 | 590 | 16 | 0.00566727 |
| 0.0961176 | 1 | 817 | 21 | 0.00504935 |
| 0.0401625 | 1 | 593 | 17 | 0.00990449 |
| 0.0703529 | 1 | 598 | 17 | 0.00660299 |
| 0.0882762 | 1 | 826 | 23 | 0.00412246 |
| 0.0692868 | 1 | 714 | 20 | 0.00529652 |
| 0.0596171 | 1 | 875 | 23 | 0.004555   |
| 0.0693811 | 1 | 593 | 12 | 0.00454618 |
| 0.0664102 | 1 | 587 | 16 | 0.00904822 |
| 0.0551916 | 1 | 674 | 18 | 0.00505817 |
| 0.0487226 | 1 | 595 | 17 | 0.0078565  |
| 0.0764616 | 1 | 650 | 16 | 0.00627637 |
| 0.0464437 | 1 | 604 | 14 | 0.00527003 |
| 0.0576997 | 1 | 604 | 14 | 0.00527003 |
| 0.0488671 | 1 | 647 | 18 | 0.00971028 |

|           |   |      |    |            |
|-----------|---|------|----|------------|
| 0.0975294 | 1 | 829  | 23 | 0.00635582 |
| 0.0898323 | 1 | 766  | 19 | 0.00399887 |
| 0.0899483 | 1 | 766  | 19 | 0.00399887 |
| 0.0729412 | 1 | 620  | 17 | 0.00685899 |
| 0.072924  | 1 | 620  | 18 | 0.00996628 |
| 0.104392  | 1 | 896  | 23 | 0.00707968 |
| 0.0612839 | 1 | 526  | 15 | 0.00915415 |
| 0.116422  | 1 | 1001 | 27 | 0.00747692 |
| 0.129176  | 1 | 1098 | 29 | 0.0084656  |
| 0.0748235 | 1 | 636  | 18 | 0.00944545 |
| 0.06      | 1 | 510  | 14 | 0.00896877 |
| 0.072     | 1 | 612  | 15 | 0.00779471 |
| 0.0980946 | 1 | 834  | 23 | 0.00402535 |
| 0.0670588 | 1 | 570  | 11 | 0.00805953 |
| 0.100147  | 1 | 888  | 24 | 0.00529652 |
| 0.0747716 | 1 | 663  | 17 | 0.00960435 |
| 0.0752726 | 1 | 642  | 18 | 0.00861567 |
| 0.0411765 | 1 | 350  | 10 | 0.00957787 |
| 0.0899358 | 1 | 798  | 17 | 0.00656768 |
| 0.0703912 | 1 | 601  | 17 | 0.00759167 |
| 0.0696885 | 1 | 595  | 17 | 0.009622   |
| 0.0748235 | 1 | 636  | 18 | 0.00636465 |
| 0.0815294 | 1 | 693  | 19 | 0.009622   |
| 0.0777518 | 1 | 664  | 19 | 0.00403418 |
| 0.068267  | 1 | 583  | 13 | 0.0090747  |
| 0.0668235 | 1 | 568  | 11 | 0.00999276 |
| 0.0695294 | 1 | 591  | 17 | 0.00973676 |
| 0.0716471 | 1 | 609  | 17 | 0.00918063 |
| 0.0704159 | 1 | 601  | 17 | 0.00729154 |
| 0.07137   | 1 | 609  | 17 | 0.00921594 |
| 0.0497647 | 1 | 423  | 12 | 0.00935718 |
| 0.0707071 | 1 | 616  | 14 | 0.00756519 |
| 0.0676471 | 1 | 575  | 16 | 0.00995745 |
| 0.0749861 | 1 | 676  | 19 | 0.00713264 |
| 0.0763946 | 1 | 656  | 18 | 0.00505817 |
| 0.0756022 | 1 | 656  | 18 | 0.00505817 |
| 0.0717647 | 1 | 610  | 16 | 0.00777705 |
| 0.0978644 | 1 | 834  | 20 | 0.00861567 |
| 0.0713698 | 1 | 607  | 13 | 0.00771526 |
| 0.0675011 | 1 | 906  | 22 | 0.00409597 |
| 0.0716471 | 1 | 609  | 17 | 0.00922477 |
| 0.0754241 | 1 | 658  | 19 | 0.0065412  |
| 0.0561343 | 1 | 652  | 13 | 0.00847443 |
| 0.0831623 | 1 | 770  | 21 | 0.00579969 |
| 0.0817583 | 1 | 757  | 21 | 0.00492576 |
| 0.0995294 | 1 | 846  | 22 | 0.00614396 |
| 0.0790588 | 1 | 672  | 19 | 0.00607334 |

|            |           |   |      |    |            |
|------------|-----------|---|------|----|------------|
| 0.0517302  |           | 1 | 586  | 16 | 0.00895111 |
| 0.0757113  |           | 1 | 644  | 17 | 0.00984269 |
| 0.0715294  |           | 1 | 608  | 16 | 0.00423721 |
| 0.0943509  |           | 1 | 947  | 26 | 0.00636465 |
| 0.0699753  |           | 1 | 595  | 16 | 0.00693844 |
| 0.07       |           | 1 | 595  | 16 | 0.00693844 |
| 0.0785882  |           | 1 | 668  | 19 | 0.00937483 |
| 0.0721698  |           | 1 | 619  | 11 | 0.00895111 |
| 0.0365674  |           | 1 | 620  | 10 | 0.00498755 |
| 0.0683063  |           | 1 | 661  | 19 | 0.00486397 |
| 0.00505788 | 0.0508475 |   | 885  | 25 | 0.00537597 |
| 0.091454   |           | 1 | 885  | 25 | 0.00537597 |
| 0.136563   |           | 1 | 1215 | 34 | 0.00552603 |
| 0.125555   |           | 1 | 1215 | 34 | 0.00552603 |
| 0.0992469  |           | 1 | 883  | 20 | 0.00895111 |
| 0.0912473  |           | 1 | 883  | 20 | 0.00895111 |
| 0.0253202  |           | 1 | 937  | 24 | 0.00476687 |
| 0.111778   |           | 1 | 968  | 27 | 0.00505817 |
| 0.0648961  | 0.991182  |   | 567  | 15 | 0.00915415 |
| 0.0842723  |           | 1 | 718  | 21 | 0.00447556 |
| 0.0844706  |           | 1 | 718  | 21 | 0.00447556 |
| 0.0413417  |           | 1 | 599  | 17 | 0.00826257 |
| 0.0658245  |           | 1 | 568  | 16 | 0.00873925 |
| 0.0667607  |           | 1 | 568  | 16 | 0.00873925 |
| 0.0706726  |           | 1 | 601  | 17 | 0.00737099 |
| 0.0673842  |           | 1 | 601  | 17 | 0.00737099 |
| 0.0734689  |           | 1 | 625  | 18 | 0.00508466 |
| 0.040913   |           | 1 | 613  | 18 | 0.00722974 |
| 0.0950988  |           | 1 | 813  | 23 | 0.00829788 |
| 0.0698439  |           | 1 | 595  | 14 | 0.00921594 |
| 0.0698491  |           | 1 | 597  | 17 | 0.00861567 |
| 0.0689735  |           | 1 | 598  | 17 | 0.00923359 |
| 0.0957697  |           | 1 | 815  | 20 | 0.00578203 |
| 0.0734118  |           | 1 | 624  | 17 | 0.00635582 |
| 0.06639    |           | 1 | 624  | 17 | 0.00635582 |
| 0.0455105  |           | 1 | 592  | 17 | 0.00966614 |
| 0.054465   |           | 1 | 874  | 25 | 0.00574672 |
| 0.0604706  |           | 1 | 514  | 15 | 0.00561431 |
| 0.0723684  |           | 1 | 616  | 17 | 0.00607334 |
| 0.0724706  |           | 1 | 616  | 17 | 0.00607334 |
| 0.0730588  |           | 1 | 621  | 17 | 0.00882753 |
| 0.033721   |           | 1 | 548  | 13 | 0.00983387 |
| 0.0359363  |           | 1 | 584  | 16 | 0.0089158  |
| 0.0635776  |           | 1 | 590  | 16 | 0.00623224 |
| 0.0697647  |           | 1 | 593  | 17 | 0.00885401 |
| 0.0674118  |           | 1 | 573  | 10 | 0.00707968 |
| 0.0788362  |           | 1 | 672  | 19 | 0.005067   |

|            |           |      |    |            |
|------------|-----------|------|----|------------|
| 0.0958168  | 1         | 820  | 23 | 0.00492576 |
| 0.0894082  | 1         | 769  | 21 | 0.0092689  |
| 0.0739375  | 1         | 802  | 23 | 0.00519941 |
| 0.0572393  | 1         | 712  | 19 | 0.00425487 |
| 0.0496021  | 1         | 617  | 18 | 0.00627637 |
| 0.0772941  | 0.58871   | 1116 | 31 | 0.00465211 |
| 0.131155   | 1         | 1116 | 31 | 0.00465211 |
| 0.110706   | 1         | 941  | 26 | 0.00535831 |
| 0.0887296  | 0.802338  | 941  | 26 | 0.00535831 |
| 0.075722   | 1         | 645  | 17 | 0.0063823  |
| 0.00396964 | 0.0527132 | 645  | 17 | 0.0063823  |
| 0.0393392  | 1         | 743  | 20 | 0.00637347 |
| 0.0867059  | 1         | 737  | 21 | 0.00545541 |
| 0.0729154  | 1         | 620  | 18 | 0.00657651 |
| 0.0403605  | 1         | 627  | 17 | 0.00474921 |
| 0.0409193  | 1         | 584  | 17 | 0.00552603 |
| 0.0842353  | 1         | 716  | 20 | 0.00529652 |
| 0.0704077  | 1         | 601  | 17 | 0.00758285 |
| 0.0859655  | 1         | 743  | 21 | 0.00843029 |
| 0.094415   | 1         | 803  | 22 | 0.00715913 |
| 0.0705031  | 1         | 604  | 17 | 0.00624106 |
| 0.0238394  | 1         | 589  | 16 | 0.00781236 |
| 0.0155422  | 1         | 384  | 11 | 0.00719444 |
| 0.0317724  | 1         | 785  | 22 | 0.00630285 |
| 0.083245   | 1         | 942  | 26 | 0.00648823 |
| 0.0600035  | 1         | 679  | 18 | 0.00922477 |
| 0.0729412  | 1         | 620  | 11 | 0.00827139 |
| 0.0402921  | 1         | 596  | 17 | 0.00882753 |
| 0.0335567  | 1         | 571  | 16 | 0.00526121 |
| 0.0782977  | 1         | 666  | 16 | 0.0057732  |
| 0.0911644  | 1         | 779  | 22 | 0.00627637 |
| 0.064      | 1         | 544  | 14 | 0.00946311 |
| 0.0994866  | 1         | 872  | 20 | 0.00920711 |
| 0.106471   | 1         | 905  | 22 | 0.00971911 |
| 0.0714118  | 1         | 607  | 17 | 0.00671775 |
| 0.0653073  | 1         | 868  | 24 | 0.00584382 |
| 0.0702353  | 1         | 597  | 12 | 0.00979856 |
| 0.083734   | 1         | 714  | 19 | 0.00619692 |
| 0.117157   | 1         | 999  | 20 | 0.0065412  |
| 0.0496603  | 1         | 424  | 11 | 0.00882753 |
| 0.0682107  | 1         | 645  | 19 | 0.0072474  |
| 0.049163   | 1         | 605  | 17 | 0.00714147 |
| 0.0789412  | 1         | 671  | 18 | 0.00821843 |
| 0.114165   | 1         | 1051 | 26 | 0.00606451 |
| 0.0988235  | 1         | 840  | 18 | 0.00478452 |
| 0.0735363  | 1         | 628  | 17 | 0.00564962 |
| 0.0515387  | 1         | 618  | 18 | 0.00967497 |

|           |          |      |    |            |
|-----------|----------|------|----|------------|
| 0.0497873 | 1        | 597  | 16 | 0.00979856 |
| 0.0700117 | 1        | 600  | 17 | 0.00943663 |
| 0.0756086 | 1        | 646  | 18 | 0.0077594  |
| 0.0889412 | 1        | 756  | 21 | 0.00827139 |
| 0.0808858 | 1        | 694  | 19 | 0.00574672 |
| 0.123882  | 1        | 1053 | 30 | 0.00635582 |
| 0.0711765 | 1        | 605  | 17 | 0.00920711 |
| 0.0390846 | 0.898438 | 384  | 11 | 0.0089776  |
| 0.0747236 | 1        | 669  | 19 | 0.00627637 |
| 0.076678  | 1        | 674  | 15 | 0.00655003 |
| 0.082364  | 1        | 701  | 19 | 0.00520824 |
| 0.061154  | 1        | 815  | 20 | 0.00961318 |
| 0.0676097 | 1        | 607  | 16 | 0.00986035 |
| 0.0721154 | 1        | 615  | 13 | 0.00617927 |
| 0.0712941 | 1        | 606  | 15 | 0.00899525 |
| 0.111162  | 1        | 967  | 26 | 0.00456383 |
| 0.0731765 | 1        | 622  | 17 | 0.00845677 |
| 0.0585882 | 1        | 498  | 14 | 0.00756519 |
| 0.0687849 | 1        | 591  | 17 | 0.00759167 |
| 0.0418824 | 1        | 356  | 10 | 0.00996628 |
| 0.0873052 | 1        | 773  | 20 | 0.0054201  |
| 0.071619  | 1        | 618  | 16 | 0.00954256 |
| 0.0721176 | 1        | 613  | 15 | 0.00745926 |
| 0.111882  | 1        | 951  | 27 | 0.00504052 |
| 0.0570349 | 1        | 604  | 17 | 0.00495224 |
| 0.0655294 | 1        | 557  | 16 | 0.00624989 |
| 0.0664706 | 1        | 565  | 13 | 0.0093307  |
| 0.0655972 | 1        | 597  | 11 | 0.00932187 |
| 0.0711765 | 1        | 605  | 17 | 0.00931304 |
| 0.106664  | 1        | 922  | 25 | 0.00550838 |
| 0.074     | 1        | 629  | 17 | 0.00855387 |
| 0.0720826 | 1        | 614  | 17 | 0.00939249 |
| 0.017074  | 0.237785 | 614  | 17 | 0.00939249 |
| 0.0709345 | 1        | 605  | 17 | 0.00932187 |
| 0.108824  | 1        | 925  | 22 | 0.00637347 |
| 0.0807059 | 1        | 686  | 20 | 0.00827139 |
| 0.0684371 | 1        | 585  | 16 | 0.00777705 |
| 0.0477105 | 1        | 596  | 13 | 0.00690313 |
| 0.0439663 | 1        | 376  | 11 | 0.00684133 |
| 0.0440494 | 1        | 721  | 19 | 0.0054201  |
| 0.0555919 | 1        | 680  | 16 | 0.00598506 |
| 0.0795973 | 1        | 680  | 16 | 0.00598506 |
| 0.0625882 | 1        | 532  | 15 | 0.00980738 |
| 0.0501176 | 1        | 426  | 10 | 0.00752988 |
| 0.0788235 | 1        | 670  | 12 | 0.00662947 |
| 0.0645882 | 1        | 549  | 11 | 0.00992214 |
| 0.156471  | 1        | 1330 | 37 | 0.00985152 |

|            |           |      |    |            |
|------------|-----------|------|----|------------|
| 0.107861   | 1         | 1014 | 29 | 0.00584382 |
| 0.0694428  | 1         | 597  | 15 | 0.00973676 |
| 0.0904206  | 1         | 774  | 21 | 0.00529652 |
| 0.0736541  | 1         | 669  | 18 | 0.00469624 |
| 0.0596471  | 1         | 507  | 15 | 0.00921594 |
| 0.0754118  | 1         | 641  | 18 | 0.00798891 |
| 0.0928235  | 1         | 789  | 22 | 0.00986035 |
| 0.125973   | 1         | 1101 | 30 | 0.00398121 |
| 0.00882145 | 0.0681199 | 1101 | 30 | 0.00398121 |
| 0.0702672  | 1         | 618  | 18 | 0.00919828 |
| 0.0738824  | 1         | 628  | 17 | 0.00749457 |
| 0.0670313  | 1         | 576  | 13 | 0.00819195 |
| 0.0933888  | 1         | 808  | 22 | 0.005579   |
| 0.0762722  | 1         | 649  | 18 | 0.00849208 |
| 0.0707059  | 1         | 601  | 17 | 0.00854505 |
| 0.0695493  | 1         | 608  | 14 | 0.0069914  |
| 0.0707635  | 1         | 608  | 14 | 0.0069914  |
| 0.0395965  | 1         | 683  | 19 | 0.00617927 |
| 0.0391423  | 1         | 617  | 17 | 0.00737981 |
| 0.0393326  | 1         | 620  | 18 | 0.00636465 |
| 0.0389946  | 1         | 619  | 17 | 0.00845677 |
| 0.0577264  | 1         | 619  | 17 | 0.00845677 |
| 0.0834801  | 1         | 711  | 19 | 0.00497873 |
| 0.0831579  | 1         | 711  | 19 | 0.00497873 |
| 0.0922353  | 1         | 784  | 21 | 0.00437845 |
| 0.074      | 1         | 629  | 13 | 0.00527003 |
| 0.0934974  | 1         | 798  | 23 | 0.0061881  |
| 0.115565   | 1         | 983  | 27 | 0.00414011 |
| 0.0689776  | 1         | 589  | 16 | 0.00920711 |
| 0.0676152  | 1         | 575  | 16 | 0.0065412  |
| 0.0720784  | 1         | 618  | 17 | 0.00888932 |
| 0.0524109  | 1         | 675  | 19 | 0.00627637 |
| 0.070726   | 1         | 604  | 16 | 0.00986035 |
| 0.0700186  | 1         | 603  | 16 | 0.00624989 |
| 0.0717225  | 1         | 610  | 17 | 0.00993097 |
| 0.113997   | 1         | 983  | 27 | 0.00558783 |
| 0.0895294  | 1         | 761  | 21 | 0.00716795 |
| 0.0892355  | 1         | 761  | 21 | 0.00716795 |
| 0.071571   | 1         | 610  | 17 | 0.00675306 |
| 0.0504212  | 1         | 796  | 21 | 0.00495224 |
| 0.0936471  | 1         | 796  | 21 | 0.00495224 |
| 0.0722157  | 1         | 616  | 17 | 0.00691195 |
| 0.10422    | 1         | 889  | 25 | 0.00564962 |
| 0.0365154  | 1         | 700  | 20 | 0.00675306 |
| 0.135556   | 1         | 1159 | 32 | 0.00520824 |
| 0.0805882  | 1         | 685  | 19 | 0.00491693 |
| 0.0694085  | 1         | 616  | 16 | 0.0064794  |

|           |   |      |    |            |
|-----------|---|------|----|------------|
| 0.0708235 | 1 | 602  | 16 | 0.00762698 |
| 0.0658117 | 1 | 585  | 16 | 0.00971028 |
| 0.0702353 | 1 | 597  | 16 | 0.009878   |
| 0.0715294 | 1 | 608  | 17 | 0.00655885 |
| 0.112373  | 1 | 970  | 27 | 0.00521707 |
| 0.0682353 | 1 | 580  | 12 | 0.00843912 |
| 0.0683921 | 1 | 584  | 17 | 0.00923359 |
| 0.0358122 | 1 | 601  | 17 | 0.0095249  |
| 0.0692941 | 1 | 589  | 15 | 0.00902173 |
| 0.0692486 | 1 | 599  | 17 | 0.0099398  |
| 0.080578  | 1 | 697  | 18 | 0.0054201  |
| 0.0682917 | 1 | 678  | 19 | 0.00519059 |
| 0.0702353 | 1 | 597  | 17 | 0.00730036 |
| 0.0719632 | 1 | 625  | 16 | 0.00935718 |
| 0.0717636 | 1 | 612  | 14 | 0.00707968 |
| 0.0608957 | 1 | 1013 | 26 | 0.00507583 |
| 0.0361688 | 1 | 594  | 17 | 0.00642644 |
| 0.0579395 | 1 | 586  | 16 | 0.00794477 |
| 0.0489562 | 1 | 598  | 15 | 0.00605568 |
| 0.0752941 | 1 | 640  | 18 | 0.00691195 |
| 0.0740569 | 1 | 640  | 18 | 0.00691195 |
| 0.0964758 | 1 | 824  | 23 | 0.00504052 |
| 0.068833  | 1 | 591  | 16 | 0.00973676 |
| 0.116371  | 1 | 1057 | 29 | 0.00627637 |
| 0.0997903 | 1 | 904  | 25 | 0.00853622 |
| 0.0705543 | 1 | 611  | 13 | 0.00749457 |
| 0.0679237 | 1 | 598  | 17 | 0.00756519 |
| 0.0767242 | 1 | 653  | 19 | 0.00529652 |
| 0.0692941 | 1 | 589  | 17 | 0.00980738 |
| 0.0734496 | 1 | 636  | 18 | 0.00652354 |
| 0.0782353 | 1 | 665  | 19 | 0.00504935 |
| 0.0756293 | 1 | 643  | 18 | 0.00585265 |
| 0.0724263 | 1 | 617  | 18 | 0.00814781 |
| 0.0736916 | 1 | 628  | 18 | 0.00870394 |
| 0.0448316 | 1 | 723  | 18 | 0.00843912 |
| 0.0438126 | 1 | 604  | 17 | 0.0094278  |
| 0.0436242 | 1 | 611  | 17 | 0.00517293 |
| 0.0665795 | 1 | 611  | 17 | 0.00517293 |
| 0.082     | 1 | 697  | 15 | 0.00956021 |
| 0.0819518 | 1 | 697  | 15 | 0.00956021 |
| 0.0837647 | 1 | 712  | 20 | 0.00662947 |
| 0.0738084 | 1 | 638  | 18 | 0.0065412  |
| 0.0746182 | 1 | 645  | 19 | 0.00900408 |
| 0.0721348 | 1 | 642  | 17 | 0.00944545 |
| 0.0722353 | 1 | 614  | 17 | 0.00504052 |
| 0.0723355 | 1 | 621  | 14 | 0.00822726 |
| 0.07      | 1 | 595  | 17 | 0.00852739 |



|            |           |      |    |            |
|------------|-----------|------|----|------------|
| 0.0979917  | 1         | 1010 | 23 | 0.00635582 |
| 0.0332581  | 1         | 604  | 14 | 0.00887167 |
| 0.0729412  | 1         | 620  | 14 | 0.00620575 |
| 0.0832941  | 1         | 708  | 20 | 0.00629403 |
| 0.0660617  | 1         | 597  | 17 | 0.00947194 |
| 0.0736471  | 1         | 626  | 18 | 0.00610865 |
| 0.0968235  | 1         | 823  | 21 | 0.00515528 |
| 0.0687265  | 1         | 585  | 16 | 0.00910118 |
| 0.0736952  | 1         | 634  | 18 | 0.00961318 |
| 0.00364449 | 0.0488959 | 634  | 18 | 0.00961318 |
| 0.0689412  | 1         | 586  | 11 | 0.00989566 |
| 0.100536   | 1         | 863  | 23 | 0.00645292 |
| 0.0969881  | 1         | 863  | 23 | 0.00645292 |
| 0.0538321  | 1         | 767  | 21 | 0.00600272 |
| 0.0977647  | 1         | 831  | 23 | 0.00692961 |
| 0.102902   | 1         | 922  | 21 | 0.00614396 |
| 0.0137955  | 0.191456  | 632  | 18 | 0.00955139 |
| 0.0442353  | 1         | 376  | 11 | 0.0066383  |
| 0.0372393  | 1         | 607  | 16 | 0.00986035 |
| 0.0717625  | 1         | 614  | 18 | 0.0077594  |
| 0.0717625  | 1         | 614  | 18 | 0.0077594  |
| 0.0697511  | 1         | 594  | 16 | 0.00859801 |
| 0.078287   | 1         | 808  | 18 | 0.00652354 |
| 0.112599   | 1         | 967  | 27 | 0.00529652 |
| 0.0641461  | 1         | 548  | 11 | 0.00915415 |
| 0.0943219  | 1         | 804  | 21 | 0.00923359 |
| 0.0723529  | 1         | 615  | 17 | 0.0082096  |
| 0.0705882  | 1         | 600  | 17 | 0.00901291 |
| 0.0704473  | 1         | 600  | 17 | 0.00901291 |
| 0.0994118  | 1         | 845  | 21 | 0.00924242 |
| 0.0811765  | 1         | 690  | 19 | 0.00633817 |
| 0.129206   | 1         | 1102 | 26 | 0.00953373 |
| 0.0727059  | 1         | 618  | 17 | 0.00965731 |
| 0.0392635  | 1         | 612  | 12 | 0.00880104 |
| 0.0780534  | 1         | 664  | 19 | 0.00995745 |
| 0.0770398  | 1         | 660  | 19 | 0.00986035 |
| 0.0879314  | 1         | 749  | 22 | 0.00627637 |
| 0.0697135  | 1         | 601  | 16 | 0.00397239 |
| 0.0536448  | 1         | 457  | 13 | 0.00529652 |
| 0.0673397  | 1         | 607  | 17 | 0.00849208 |
| 0.0706773  | 1         | 1297 | 30 | 0.00404301 |
| 0.152319   | 1         | 1297 | 30 | 0.00404301 |
| 0.035148   | 1         | 645  | 17 | 0.00404301 |
| 0.0757487  | 1         | 645  | 17 | 0.00404301 |
| 0.0697647  | 1         | 593  | 17 | 0.0079536  |
| 0.0735692  | 1         | 626  | 18 | 0.00890698 |
| 0.0530989  | 1         | 616  | 18 | 0.00641761 |

|           |   |     |    |            |
|-----------|---|-----|----|------------|
| 0.0753633 | 1 | 643 | 17 | 0.00903056 |
| 0.0697647 | 1 | 593 | 12 | 0.00976324 |
| 0.0737647 | 1 | 627 | 18 | 0.00737099 |
| 0.0840484 | 1 | 715 | 20 | 0.00878339 |
| 0.070361  | 1 | 612 | 16 | 0.00535831 |
| 0.0721007 | 1 | 613 | 14 | 0.00716795 |
| 0.0710856 | 1 | 607 | 14 | 0.00662947 |
| 0.0705882 | 1 | 600 | 17 | 0.00886284 |
| 0.0529461 | 1 | 753 | 21 | 0.00639996 |
| 0.0885882 | 1 | 753 | 21 | 0.00639996 |
| 0.043946  | 1 | 625 | 18 | 0.00921594 |
| 0.0910476 | 1 | 777 | 22 | 0.00949842 |
| 0.0489148 | 1 | 613 | 12 | 0.00855387 |
| 0.0715703 | 1 | 613 | 12 | 0.00855387 |
| 0.0691306 | 1 | 621 | 16 | 0.00847443 |
| 0.0724944 | 1 | 617 | 17 | 0.00993097 |
| 0.0870588 | 1 | 740 | 21 | 0.00402535 |
| 0.0717647 | 1 | 610 | 17 | 0.00598506 |
| 0.0789349 | 1 | 833 | 23 | 0.0099398  |
| 0.0707059 | 1 | 601 | 14 | 0.00745926 |
| 0.0377002 | 1 | 638 | 17 | 0.00918063 |
| 0.0702353 | 1 | 597 | 17 | 0.00754754 |
| 0.0419181 | 1 | 528 | 10 | 0.00863332 |
| 0.0751233 | 1 | 655 | 17 | 0.00970145 |
| 0.0697036 | 1 | 609 | 17 | 0.00443142 |
| 0.0333025 | 1 | 719 | 20 | 0.00636465 |
| 0.0734017 | 1 | 651 | 15 | 0.00504052 |
| 0.0690044 | 1 | 612 | 10 | 0.00938366 |
| 0.0900541 | 1 | 766 | 17 | 0.00643527 |
| 0.0674056 | 1 | 596 | 17 | 0.00469624 |
| 0.0701836 | 1 | 604 | 12 | 0.00960435 |
| 0.0714618 | 1 | 615 | 17 | 0.00773291 |
| 0.0982353 | 1 | 835 | 24 | 0.00538479 |
| 0.0826731 | 1 | 793 | 22 | 0.00398121 |
| 0.0663737 | 1 | 574 | 16 | 0.00918946 |
| 0.0698166 | 1 | 594 | 16 | 0.00990449 |
| 0.0890588 | 1 | 757 | 20 | 0.00633817 |
| 0.0978095 | 1 | 835 | 19 | 0.00877456 |
| 0.0716471 | 1 | 609 | 17 | 0.00953373 |
| 0.0588014 | 1 | 626 | 16 | 0.00956021 |
| 0.074     | 1 | 629 | 16 | 0.00805953 |
| 0.109488  | 1 | 937 | 25 | 0.00965731 |
| 0.0755248 | 1 | 644 | 18 | 0.00912766 |
| 0.0785739 | 1 | 670 | 19 | 0.00651472 |
| 0.0696471 | 1 | 592 | 17 | 0.00918063 |
| 0.0513212 | 1 | 437 | 12 | 0.00885401 |
| 0.068253  | 1 | 588 | 10 | 0.00652354 |

|           |   |      |    |            |
|-----------|---|------|----|------------|
| 0.0691765 | 1 | 588  | 10 | 0.00652354 |
| 0.0708235 | 1 | 602  | 17 | 0.00825374 |
| 0.0855232 | 1 | 729  | 20 | 0.00569376 |
| 0.0742041 | 1 | 634  | 12 | 0.00468742 |
| 0.0921486 | 1 | 784  | 22 | 0.00489928 |
| 0.0802704 | 1 | 843  | 24 | 0.00608217 |
| 0.0789412 | 1 | 671  | 18 | 0.00675306 |
| 0.0876471 | 1 | 745  | 21 | 0.00504052 |
| 0.0731765 | 1 | 622  | 18 | 0.00971028 |
| 0.0750588 | 1 | 638  | 18 | 0.00671775 |
| 0.094271  | 1 | 803  | 23 | 0.00504052 |
| 0.10354   | 1 | 895  | 25 | 0.00966614 |
| 0.0570346 | 1 | 602  | 17 | 0.00902173 |
| 0.0616471 | 1 | 524  | 13 | 0.0095867  |
| 0.0763529 | 1 | 649  | 13 | 0.00999276 |
| 0.0779117 | 1 | 976  | 27 | 0.00510231 |
| 0.0477422 | 1 | 406  | 12 | 0.00552603 |
| 0.0728235 | 1 | 619  | 12 | 0.00911001 |
| 0.0714118 | 1 | 607  | 17 | 0.00986918 |
| 0.188235  | 1 | 1600 | 44 | 0.00521707 |
| 0.076     | 1 | 646  | 17 | 0.00876573 |
| 0.114235  | 1 | 971  | 27 | 0.00505817 |
| 0.0705882 | 1 | 600  | 13 | 0.00896877 |
| 0.120706  | 1 | 1026 | 26 | 0.00779471 |
| 0.0802282 | 1 | 689  | 15 | 0.0095249  |
| 0.0707902 | 1 | 602  | 17 | 0.00828022 |
| 0.0634078 | 1 | 681  | 18 | 0.00992214 |
| 0.0653631 | 1 | 702  | 20 | 0.00641761 |
| 0.0876546 | 1 | 808  | 23 | 0.00635582 |
| 0.0829337 | 1 | 709  | 20 | 0.00469624 |
| 0.0614542 | 1 | 617  | 17 | 0.00868629 |
| 0.0521549 | 1 | 478  | 10 | 0.00657651 |
| 0.0688235 | 1 | 585  | 17 | 0.00526121 |
| 0.0727978 | 1 | 619  | 17 | 0.00833319 |
| 0.0718388 | 1 | 638  | 18 | 0.00783002 |
| 0.110267  | 1 | 943  | 26 | 0.00491693 |
| 0.0735053 | 1 | 627  | 18 | 0.00708851 |
| 0.0910157 | 1 | 776  | 16 | 0.00827139 |
| 0.0958437 | 1 | 844  | 23 | 0.00469624 |
| 0.069762  | 1 | 595  | 17 | 0.00619692 |
| 0.0716471 | 1 | 609  | 17 | 0.00781236 |
| 0.112588  | 1 | 957  | 27 | 0.00636465 |
| 0.103841  | 1 | 884  | 25 | 0.00545541 |
| 0.0465079 | 1 | 586  | 16 | 0.00841263 |
| 0.0863419 | 1 | 739  | 20 | 0.0066383  |
| 0.0728235 | 1 | 619  | 25 | 0.0095867  |
| 0.0631903 | 1 | 595  | 17 | 0.00911884 |

|           |   |      |    |            |
|-----------|---|------|----|------------|
| 0.0723529 | 1 | 615  | 10 | 0.00831553 |
| 0.0770789 | 1 | 685  | 18 | 0.00637347 |
| 0.0606236 | 1 | 523  | 15 | 0.00602037 |
| 0.0697809 | 1 | 602  | 17 | 0.00960435 |
| 0.0709567 | 1 | 623  | 18 | 0.00844794 |
| 0.0399692 | 1 | 622  | 17 | 0.00579086 |
| 0.0552628 | 1 | 860  | 23 | 0.00609099 |
| 0.104118  | 1 | 885  | 25 | 0.00598506 |
| 0.0724706 | 1 | 616  | 18 | 0.00874808 |
| 0.121297  | 1 | 1089 | 30 | 0.00564962 |
| 0.0313542 | 1 | 677  | 19 | 0.00878339 |
| 0.0529227 | 1 | 488  | 14 | 0.00606451 |
| 0.0690624 | 1 | 590  | 17 | 0.00544658 |
| 0.0497477 | 1 | 424  | 12 | 0.00439611 |
| 0.0776264 | 1 | 883  | 24 | 0.00469624 |
| 0.0516923 | 1 | 588  | 15 | 0.00609099 |
| 0.0747745 | 1 | 688  | 20 | 0.00605568 |
| 0.07493   | 1 | 642  | 17 | 0.00521707 |
| 0.0392996 | 1 | 615  | 18 | 0.00882753 |
| 0.0364574 | 1 | 615  | 18 | 0.00882753 |
| 0.0547375 | 1 | 684  | 20 | 0.0061881  |
| 0.0340619 | 1 | 681  | 19 | 0.00700906 |
| 0.0716959 | 1 | 613  | 17 | 0.00805071 |
| 0.0730588 | 1 | 621  | 18 | 0.00981621 |
| 0.0367108 | 1 | 646  | 18 | 0.0092689  |
| 0.0998592 | 1 | 851  | 24 | 0.00527003 |
| 0.0684788 | 1 | 587  | 16 | 0.0089158  |
| 0.116353  | 1 | 989  | 26 | 0.00397239 |
| 0.0728235 | 1 | 619  | 16 | 0.00983387 |
| 0.102941  | 1 | 875  | 24 | 0.00469624 |
| 0.0871765 | 1 | 741  | 20 | 0.00553486 |
| 0.0726119 | 1 | 618  | 14 | 0.00863332 |
| 0.0318753 | 1 | 497  | 14 | 0.00969263 |
| 0.0364222 | 1 | 599  | 17 | 0.0079536  |
| 0.0706812 | 1 | 608  | 17 | 0.00714147 |
| 0.0430079 | 1 | 644  | 19 | 0.00700906 |
| 0.0920412 | 1 | 813  | 23 | 0.00651472 |
| 0.0587826 | 1 | 591  | 10 | 0.00659416 |
| 0.0943529 | 1 | 802  | 17 | 0.00984269 |
| 0.0826378 | 1 | 703  | 20 | 0.00603803 |
| 0.069629  | 1 | 608  | 17 | 0.00896877 |
| 0.0684499 | 1 | 586  | 16 | 0.00790946 |
| 0.0932941 | 1 | 793  | 22 | 0.00808601 |
| 0.0483858 | 1 | 601  | 17 | 0.00733567 |
| 0.0822256 | 1 | 699  | 20 | 0.00545541 |
| 0.0427689 | 1 | 658  | 18 | 0.00804188 |
| 0.0694754 | 1 | 592  | 15 | 0.00772409 |

|           |          |      |    |            |
|-----------|----------|------|----|------------|
| 0.0929412 | 1        | 790  | 22 | 0.00399887 |
| 0.0536527 | 1        | 802  | 22 | 0.00514645 |
| 0.0891765 | 1        | 758  | 20 | 0.00652354 |
| 0.072     | 1        | 612  | 14 | 0.00714147 |
| 0.0641542 | 1        | 589  | 10 | 0.0091718  |
| 0.0695764 | 1        | 593  | 17 | 0.00995745 |
| 0.0612339 | 1        | 529  | 15 | 0.0072474  |
| 0.048645  | 1        | 1007 | 28 | 0.00661182 |
| 0.0138461 | 1        | 863  | 21 | 0.00399887 |
| 0.0234205 | 0.237543 | 863  | 21 | 0.00399887 |
| 0.164458  | 1        | 1626 | 42 | 0.00527003 |
| 0.0714118 | 1        | 607  | 17 | 0.00986035 |
| 0.0705871 | 1        | 707  | 18 | 0.00974559 |
| 0.09222   | 1        | 1068 | 29 | 0.00912766 |
| 0.0528452 | 1        | 612  | 17 | 0.00888932 |
| 0.0716471 | 1        | 609  | 18 | 0.00822726 |
| 0.0661678 | 1        | 619  | 17 | 0.00893346 |
| 0.0711765 | 1        | 605  | 17 | 0.00688547 |
| 0.072     | 1        | 612  | 17 | 0.00818312 |
| 0.0432747 | 1        | 804  | 22 | 0.00636465 |
| 0.0769412 | 1        | 654  | 16 | 0.00834201 |
| 0.0682771 | 1        | 619  | 17 | 0.00635582 |
| 0.0670588 | 1        | 570  | 16 | 0.00816546 |
| 0.0705936 | 1        | 622  | 11 | 0.00886284 |
| 0.0931765 | 1        | 792  | 22 | 0.0087216  |
| 0.0688235 | 1        | 585  | 16 | 0.00998393 |
| 0.0888811 | 1        | 757  | 21 | 0.00982504 |
| 0.0841953 | 1        | 757  | 21 | 0.00982504 |
| 0.0729412 | 1        | 620  | 18 | 0.00848325 |
| 0.0687592 | 1        | 609  | 17 | 0.00966614 |
| 0.0752941 | 1        | 640  | 18 | 0.00923359 |
| 0.0850715 | 1        | 726  | 18 | 0.00653237 |
| 0.0378573 | 1        | 588  | 16 | 0.00758285 |
| 0.09715   | 1        | 859  | 20 | 0.00824491 |
| 0.0705346 | 1        | 603  | 15 | 0.0067972  |
| 0.0710612 | 1        | 608  | 17 | 0.00745926 |
| 0.0890588 | 1        | 757  | 20 | 0.00550838 |
| 0.10062   | 1        | 876  | 24 | 0.00504052 |
| 0.0978824 | 1        | 832  | 19 | 0.00467859 |
| 0.0696471 | 1        | 592  | 17 | 0.00954256 |
| 0.0813642 | 1        | 699  | 20 | 0.00411363 |
| 0.0921176 | 1        | 783  | 19 | 0.0060292  |
| 0.0305721 | 1        | 871  | 23 | 0.005067   |
| 0.0677928 | 1        | 598  | 10 | 0.00996628 |
| 0.0755294 | 1        | 642  | 17 | 0.00570258 |
| 0.0703529 | 1        | 598  | 17 | 0.00771526 |
| 0.0876471 | 1        | 745  | 21 | 0.00497873 |

|           |         |      |    |            |
|-----------|---------|------|----|------------|
| 0.0938319 | 1       | 823  | 22 | 0.00468742 |
| 0.0964604 | 1       | 823  | 22 | 0.00468742 |
| 0.08      | 1       | 680  | 19 | 0.00470507 |
| 0.079495  | 1       | 680  | 19 | 0.00470507 |
| 0.0765882 | 1       | 651  | 18 | 0.0059321  |
| 0.0761047 | 1       | 651  | 18 | 0.0059321  |
| 0.0611765 | 1       | 520  | 15 | 0.00808601 |
| 0.0998823 | 1       | 849  | 24 | 0.00782119 |
| 0.0662353 | 1       | 563  | 16 | 0.0052259  |
| 0.0712774 | 1       | 606  | 17 | 0.00630285 |
| 0.0791199 | 1       | 676  | 19 | 0.00893346 |
| 0.116353  | 1       | 989  | 28 | 0.00970145 |
| 0.0656257 | 1       | 559  | 16 | 0.00953373 |
| 0.0758824 | 1       | 645  | 17 | 0.00636465 |
| 0.0701176 | 1       | 596  | 17 | 0.00924242 |
| 0.0397807 | 1       | 769  | 20 | 0.00397239 |
| 0.0606273 | 1       | 605  | 15 | 0.00571141 |
| 0.102077  | 1       | 1106 | 31 | 0.00503169 |
| 0.0661585 | 1       | 677  | 18 | 0.00609099 |
| 0.0691099 | 1       | 594  | 16 | 0.00911001 |
| 0.0711346 | 1       | 605  | 17 | 0.0068943  |
| 0.03708   | 1       | 512  | 15 | 0.00782119 |
| 0.0488332 | 1       | 588  | 11 | 0.00772409 |
| 0.0703938 | 1       | 622  | 16 | 0.00966614 |
| 0.0692941 | 1       | 589  | 17 | 0.00746809 |
| 0.0818054 | 1       | 696  | 16 | 0.00484631 |
| 0.0384885 | 1       | 330  | 10 | 0.0091718  |
| 0.0502388 | 1       | 589  | 17 | 0.00888932 |
| 0.0813027 | 1       | 694  | 19 | 0.00666478 |
| 0.0804451 | 1       | 694  | 19 | 0.00666478 |
| 0.0984706 | 1       | 837  | 24 | 0.0094278  |
| 0.0542642 | 1       | 705  | 20 | 0.00529652 |
| 0.0423    | 1       | 590  | 16 | 0.00861567 |
| 0.0729412 | 1       | 620  | 17 | 0.00733567 |
| 0.0747059 | 1       | 635  | 17 | 0.0081125  |
| 0.0483378 | 1       | 807  | 15 | 0.00691195 |
| 0.0694461 | 1       | 593  | 15 | 0.00883636 |
| 0.069329  | 1       | 592  | 16 | 0.009622   |
| 0.0684098 | 1       | 641  | 18 | 0.0093307  |
| 0.0902882 | 1       | 846  | 23 | 0.00505817 |
| 0.0831765 | 1       | 707  | 14 | 0.00994862 |
| 0.0964491 | 1       | 823  | 23 | 0.00637347 |
| 0.0729412 | 1       | 620  | 18 | 0.00648823 |
| 0.0690588 | 1       | 587  | 17 | 0.0093307  |
| 0.0515294 | 0.84556 | 518  | 15 | 0.0068943  |
| 0.0728235 | 1       | 619  | 17 | 0.0095249  |
| 0.0725882 | 1       | 617  | 15 | 0.00535831 |

|           |          |      |    |            |
|-----------|----------|------|----|------------|
| 0.144118  | 1        | 1225 | 28 | 0.00504052 |
| 0.066     | 1        | 561  | 16 | 0.00608217 |
| 0.111647  | 1        | 949  | 26 | 0.00888049 |
| 0.0698824 | 1        | 594  | 16 | 0.0068943  |
| 0.0692941 | 1        | 589  | 17 | 0.00752105 |
| 0.0760933 | 1        | 649  | 17 | 0.00511114 |
| 0.0830397 | 1        | 707  | 20 | 0.00531417 |
| 0.0804706 | 1        | 684  | 19 | 0.00513762 |
| 0.0460937 | 1        | 754  | 22 | 0.00949842 |
| 0.0790588 | 1        | 672  | 19 | 0.00404301 |
| 0.0776471 | 1        | 660  | 16 | 0.00520824 |
| 0.0790709 | 1        | 674  | 19 | 0.00584382 |
| 0.0490317 | 1        | 557  | 12 | 0.00973676 |
| 0.0600185 | 1        | 777  | 22 | 0.00464328 |
| 0.0530666 | 1        | 687  | 18 | 0.00631168 |
| 0.0729412 | 1        | 620  | 17 | 0.00903056 |
| 0.0794118 | 1        | 675  | 17 | 0.00565844 |
| 0.0762353 | 1        | 648  | 17 | 0.00674423 |
| 0.0701176 | 1        | 596  | 16 | 0.00896877 |
| 0.0736203 | 1        | 679  | 19 | 0.00691195 |
| 0.0723145 | 1        | 618  | 17 | 0.00995745 |
| 0.0214014 | 1        | 456  | 13 | 0.00563196 |
| 0.0310696 | 1        | 662  | 15 | 0.00496107 |
| 0.0778823 | 1        | 662  | 15 | 0.00496107 |
| 0.0710684 | 1        | 606  | 17 | 0.00792712 |
| 0.0550032 | 1        | 603  | 16 | 0.00733567 |
| 0.0711765 | 1        | 605  | 17 | 0.00865981 |
| 0.0195275 | 1        | 624  | 12 | 0.00601155 |
| 0.0701287 | 1        | 605  | 15 | 0.00959552 |
| 0.0551765 | 0.743265 | 631  | 18 | 0.00609982 |
| 0.0377052 | 1        | 604  | 16 | 0.00903939 |
| 0.0831276 | 1        | 707  | 20 | 0.00523472 |
| 0.0761173 | 1        | 654  | 18 | 0.00894229 |
| 0.115712  | 1        | 992  | 26 | 0.00464328 |
| 0.0552059 | 1        | 614  | 13 | 0.00922477 |
| 0.130168  | 1        | 1190 | 29 | 0.00651472 |
| 0.0300401 | 1        | 592  | 13 | 0.00943663 |
| 0.0514259 | 1        | 660  | 19 | 0.00535831 |
| 0.107438  | 1        | 923  | 23 | 0.004555   |
| 0.0797647 | 1        | 678  | 19 | 0.00560548 |
| 0.0459879 | 1        | 678  | 19 | 0.00560548 |
| 0.0226393 | 1        | 591  | 17 | 0.00528769 |
| 0.0346294 | 1        | 904  | 20 | 0.00754754 |
| 0.0308998 | 0.301991 | 904  | 20 | 0.00754754 |
| 0.0694118 | 1        | 590  | 15 | 0.00843029 |
| 0.086     | 1        | 731  | 17 | 0.00399887 |
| 0.0535525 | 1        | 606  | 17 | 0.00920711 |

|            |          |      |    |            |
|------------|----------|------|----|------------|
| 0.0706788  | 1        | 606  | 17 | 0.00920711 |
| 0.0951835  | 1        | 830  | 23 | 0.00437845 |
| 0.0815491  | 1        | 697  | 17 | 0.00920711 |
| 0.0751765  | 1        | 639  | 16 | 0.00935718 |
| 0.065084   | 1        | 732  | 21 | 0.00579086 |
| 0.101088   | 1        | 864  | 25 | 0.00749457 |
| 0.0698824  | 1        | 594  | 16 | 0.00964849 |
| 0.100012   | 1        | 854  | 24 | 0.00491693 |
| 0.0437566  | 1        | 998  | 27 | 0.00495224 |
| 0.0937647  | 1        | 797  | 23 | 0.00902173 |
| 0.0982353  | 1        | 835  | 23 | 0.00504935 |
| 0.0684706  | 1        | 582  | 16 | 0.00984269 |
| 0.0811995  | 1        | 723  | 21 | 0.00867746 |
| 0.095575   | 1        | 851  | 24 | 0.0065412  |
| 0.0693988  | 1        | 591  | 12 | 0.00904822 |
| 0.0679976  | 1        | 579  | 16 | 0.00539362 |
| 0.0831765  | 1        | 707  | 20 | 0.00986035 |
| 0.112421   | 1        | 1020 | 26 | 0.00560548 |
| 0.070236   | 1        | 610  | 16 | 0.0065412  |
| 0.0632518  | 1        | 610  | 16 | 0.0065412  |
| 0.182729   | 1        | 1587 | 40 | 0.00531417 |
| 0.0300222  | 1        | 596  | 16 | 0.00927773 |
| 0.124765   | 1        | 1061 | 27 | 0.00992214 |
| 0.0609524  | 1        | 608  | 17 | 0.00973676 |
| 0.0358314  | 1        | 601  | 17 | 0.0085627  |
| 0.130849   | 1        | 1141 | 28 | 0.00399887 |
| 0.00689018 | 0.125767 | 652  | 18 | 0.00887167 |
| 0.0734608  | 1        | 630  | 18 | 0.0065412  |
| 0.0716479  | 1        | 630  | 18 | 0.0065412  |
| 0.0711606  | 1        | 607  | 17 | 0.00914532 |
| 0.0808976  | 1        | 703  | 18 | 0.00414011 |
| 0.0827059  | 1        | 703  | 18 | 0.00414011 |
| 0.06916    | 1        | 601  | 12 | 0.00863332 |
| 0.0850188  | 1        | 723  | 20 | 0.00594975 |
| 0.0701734  | 1        | 599  | 16 | 0.00880104 |
| 0.0713367  | 1        | 610  | 17 | 0.00995745 |
| 0.0828235  | 1        | 704  | 20 | 0.00475804 |
| 0.076639   | 1        | 664  | 18 | 0.00951608 |
| 0.0821176  | 1        | 698  | 13 | 0.00680602 |
| 0.0721176  | 1        | 613  | 15 | 0.00981621 |
| 0.0768235  | 1        | 653  | 18 | 0.0042019  |
| 0.0757647  | 1        | 644  | 13 | 0.00895994 |
| 0.0794827  | 1        | 676  | 19 | 0.00729154 |
| 0.0365157  | 1        | 620  | 18 | 0.00530534 |
| 0.0450876  | 1        | 620  | 18 | 0.00530534 |
| 0.0691964  | 1        | 589  | 17 | 0.009622   |
| 0.068844   | 1        | 586  | 17 | 0.00552603 |



|            |          |      |    |            |
|------------|----------|------|----|------------|
| 0.109765   | 1        | 933  | 22 | 0.00723857 |
| 0.086982   | 1        | 743  | 19 | 0.00466094 |
| 0.00974939 | 1        | 610  | 17 | 0.00883636 |
| 0.0796471  | 0.956215 | 708  | 16 | 0.00507583 |
| 0.0095576  | 1        | 598  | 13 | 0.00667361 |
| 0.0974359  | 1        | 855  | 22 | 0.0059321  |
| 0.0443529  | 1        | 377  | 10 | 0.00779471 |
| 0.0708724  | 1        | 628  | 18 | 0.00841263 |
| 0.0464706  | 0.412748 | 957  | 27 | 0.0063823  |
| 0.0947059  | 1        | 805  | 23 | 0.00489045 |
| 0.102824   | 1        | 874  | 23 | 0.00613513 |
| 0.0961493  | 1        | 819  | 23 | 0.00657651 |
| 0.0783048  | 1        | 667  | 18 | 0.00698257 |
| 0.119864   | 1        | 1021 | 28 | 0.00534948 |
| 0.0912941  | 1        | 776  | 22 | 0.00647058 |
| 0.0717503  | 1        | 701  | 18 | 0.00984269 |
| 0.118588   | 1        | 1008 | 28 | 0.00797126 |
| 0.0984706  | 1        | 837  | 24 | 0.00528769 |
| 0.0732292  | 1        | 642  | 15 | 0.00571141 |
| 0.0811765  | 1        | 690  | 19 | 0.00980738 |
| 0.0729412  | 1        | 620  | 17 | 0.00888932 |
| 0.088      | 1        | 748  | 21 | 0.004811   |
| 0.0910472  | 1        | 779  | 20 | 0.00916297 |
| 0.112      | 1        | 952  | 25 | 0.00462562 |
| 0.0699424  | 1        | 595  | 17 | 0.00858036 |
| 0.072924   | 1        | 620  | 17 | 0.00759167 |
| 0.0701857  | 1        | 601  | 16 | 0.00737981 |
| 0.0673362  | 1        | 590  | 17 | 0.00578203 |
| 0.0708348  | 1        | 605  | 12 | 0.00671775 |
| 0.052042   | 1        | 446  | 13 | 0.00924242 |
| 0.0299953  | 1        | 446  | 13 | 0.00924242 |
| 0.0707059  | 1        | 601  | 16 | 0.00935718 |
| 0.0851136  | 1        | 757  | 21 | 0.00466094 |
| 0.121399   | 1        | 1045 | 24 | 0.00600272 |
| 0.10768    | 1        | 917  | 26 | 0.00608217 |
| 0.0613863  | 1        | 596  | 17 | 0.00875691 |
| 0.123399   | 1        | 1050 | 21 | 0.00643527 |
| 0.0949459  | 1        | 851  | 24 | 0.00619692 |
| 0.0418382  | 1        | 762  | 21 | 0.00462562 |
| 0.0284961  | 1        | 519  | 15 | 0.00874808 |
| 0.0744518  | 1        | 730  | 20 | 0.00865098 |
| 0.0758824  | 1        | 645  | 18 | 0.00728271 |
| 0.118118   | 1        | 1004 | 27 | 0.00478452 |
| 0.121298   | 1        | 1032 | 23 | 0.00404301 |
| 0.0766941  | 1        | 670  | 18 | 0.00443142 |
| 0.0940934  | 1        | 822  | 23 | 0.00807719 |
| 0.0697947  | 1        | 595  | 16 | 0.00684133 |

|           |          |      |    |            |
|-----------|----------|------|----|------------|
| 0.0714118 | 1        | 607  | 17 | 0.00682368 |
| 0.0722353 | 1        | 614  | 12 | 0.00986035 |
| 0.0709412 | 1        | 603  | 17 | 0.00579969 |
| 0.0843529 | 1        | 717  | 20 | 0.00997511 |
| 0.0893757 | 1        | 763  | 21 | 0.00858918 |
| 0.114856  | 1        | 978  | 24 | 0.00632051 |
| 0.0440149 | 1        | 674  | 19 | 0.00652354 |
| 0.0788235 | 1        | 670  | 19 | 0.00664713 |
| 0.0586154 | 1        | 613  | 17 | 0.00969263 |
| 0.0722934 | 1        | 615  | 13 | 0.0076005  |
| 0.0797018 | 1        | 695  | 16 | 0.00820077 |
| 0.115765  | 1        | 984  | 27 | 0.00551721 |
| 0.0394545 | 1        | 651  | 19 | 0.00828022 |
| 0.0369697 | 1        | 610  | 17 | 0.00758285 |
| 0.0895294 | 1        | 761  | 22 | 0.00940132 |
| 0.0890194 | 1        | 758  | 19 | 0.00602037 |
| 0.0504544 | 1        | 694  | 18 | 0.0064794  |
| 0.0674118 | 0.956594 | 599  | 17 | 0.00863332 |
| 0.078735  | 1        | 1083 | 29 | 0.00578203 |
| 0.0368014 | 1        | 590  | 17 | 0.00714147 |
| 0.0725364 | 1        | 622  | 17 | 0.00685899 |
| 0.0606304 | 1        | 604  | 17 | 0.00777705 |
| 0.0947566 | 1        | 806  | 19 | 0.00504935 |
| 0.042927  | 1        | 606  | 17 | 0.00751223 |
| 0.0415811 | 1        | 587  | 12 | 0.0076976  |
| 0.070917  | 1        | 604  | 17 | 0.00940132 |
| 0.0670739 | 1        | 593  | 17 | 0.00792712 |
| 0.0828153 | 1        | 706  | 20 | 0.0064794  |
| 0.113947  | 1        | 1000 | 20 | 0.00448438 |
| 0.0734118 | 1        | 624  | 18 | 0.00905704 |
| 0.0677072 | 1        | 603  | 16 | 0.0079536  |
| 0.0706834 | 1        | 603  | 16 | 0.0079536  |
| 0.068445  | 1        | 603  | 17 | 0.00731802 |
| 0.0694118 | 1        | 590  | 17 | 0.00874808 |
| 0.0754407 | 1        | 642  | 18 | 0.00716795 |
| 0.0776506 | 1        | 665  | 17 | 0.00564962 |
| 0.0727059 | 1        | 618  | 18 | 0.00954256 |
| 0.0774118 | 1        | 658  | 19 | 0.00399887 |
| 0.0690451 | 1        | 658  | 19 | 0.00399887 |
| 0.0698201 | 1        | 679  | 19 | 0.00901291 |
| 0.0822238 | 1        | 704  | 18 | 0.00527003 |
| 0.114711  | 1        | 995  | 24 | 0.00659416 |
| 0.0902353 | 1        | 767  | 21 | 0.00521707 |
| 0.102243  | 1        | 1030 | 28 | 0.00504935 |
| 0.0709018 | 1        | 923  | 25 | 0.00980738 |
| 0.110889  | 1        | 944  | 26 | 0.00511114 |
| 0.0838816 | 1        | 714  | 19 | 0.00674423 |

|           |   |      |    |            |
|-----------|---|------|----|------------|
| 0.0996713 | 1 | 849  | 23 | 0.00607334 |
| 0.07      | 1 | 595  | 17 | 0.00980738 |
| 0.07      | 1 | 595  | 17 | 0.00980738 |
| 0.0729412 | 1 | 620  | 17 | 0.00719444 |
| 0.107529  | 1 | 914  | 24 | 0.00633817 |
| 0.172824  | 1 | 1469 | 34 | 0.00615279 |
| 0.0517647 | 1 | 440  | 11 | 0.00863332 |
| 0.0695294 | 1 | 591  | 17 | 0.00943663 |
| 0.0871963 | 1 | 743  | 21 | 0.00497873 |
| 0.13719   | 1 | 1169 | 25 | 0.00509348 |
| 0.0715294 | 1 | 608  | 17 | 0.00963966 |
| 0.0772547 | 1 | 663  | 19 | 0.00777705 |
| 0.0758085 | 1 | 654  | 14 | 0.00888932 |
| 0.0756046 | 1 | 644  | 18 | 0.00559665 |
| 0.0851511 | 1 | 730  | 21 | 0.00981621 |
| 0.106706  | 1 | 907  | 25 | 0.00617044 |
| 0.0833041 | 1 | 712  | 19 | 0.00535831 |
| 0.0985368 | 1 | 963  | 22 | 0.00783002 |
| 0.109794  | 1 | 963  | 22 | 0.00783002 |
| 0.0803233 | 1 | 785  | 18 | 0.00579086 |
| 0.0894995 | 1 | 785  | 18 | 0.00579086 |
| 0.0682802 | 1 | 615  | 17 | 0.00758285 |
| 0.0666512 | 1 | 573  | 16 | 0.00895111 |
| 0.0861401 | 1 | 734  | 15 | 0.00675306 |
| 0.061429  | 1 | 760  | 20 | 0.00411363 |
| 0.0798453 | 1 | 702  | 20 | 0.00504935 |
| 0.0822978 | 1 | 702  | 20 | 0.00504935 |
| 0.0440854 | 1 | 603  | 17 | 0.00716795 |
| 0.0649015 | 1 | 603  | 17 | 0.00716795 |
| 0.0711136 | 1 | 645  | 18 | 0.00730036 |
| 0.0762353 | 1 | 648  | 18 | 0.00737099 |
| 0.0825882 | 1 | 702  | 19 | 0.00635582 |
| 0.0698432 | 1 | 708  | 19 | 0.0065412  |
| 0.06743   | 1 | 901  | 25 | 0.00431666 |
| 0.045128  | 1 | 603  | 15 | 0.00636465 |
| 0.0734016 | 1 | 659  | 19 | 0.00561431 |
| 0.0928246 | 1 | 815  | 23 | 0.00636465 |
| 0.0693825 | 1 | 591  | 16 | 0.00847443 |
| 0.0635826 | 1 | 591  | 16 | 0.00847443 |
| 0.0738069 | 1 | 665  | 18 | 0.00831553 |
| 0.0302713 | 1 | 608  | 17 | 0.00988683 |
| 0.0691513 | 1 | 616  | 11 | 0.00923359 |
| 0.0662326 | 1 | 590  | 14 | 0.00985152 |
| 0.0724757 | 1 | 618  | 17 | 0.00981621 |
| 0.0727059 | 1 | 618  | 17 | 0.00981621 |
| 0.106989  | 1 | 920  | 26 | 0.0064794  |
| 0.0868561 | 1 | 752  | 21 | 0.00920711 |

|           |   |      |    |            |
|-----------|---|------|----|------------|
| 0.0587388 | 1 | 530  | 15 | 0.00636465 |
| 0.0707059 | 1 | 601  | 16 | 0.00733567 |
| 0.121159  | 1 | 1033 | 29 | 0.00864215 |
| 0.0857809 | 1 | 736  | 20 | 0.00542893 |
| 0.116144  | 1 | 1018 | 28 | 0.00657651 |
| 0.072467  | 1 | 658  | 18 | 0.00716795 |
| 0.0812941 | 1 | 691  | 18 | 0.00630285 |
| 0.0708995 | 1 | 603  | 10 | 0.00888049 |
| 0.0668121 | 1 | 582  | 15 | 0.00986035 |
| 0.0807832 | 1 | 689  | 19 | 0.00838615 |
| 0.121848  | 1 | 1039 | 25 | 0.0089158  |
| 0.061048  | 1 | 607  | 15 | 0.00973676 |
| 0.0564943 | 1 | 672  | 18 | 0.00579086 |
| 0.0836471 | 1 | 711  | 20 | 0.00613513 |
| 0.0687059 | 1 | 584  | 15 | 0.00835967 |
| 0.0873529 | 1 | 757  | 22 | 0.00983387 |
| 0.0875294 | 1 | 744  | 20 | 0.00504052 |
| 0.058     | 1 | 493  | 14 | 0.00782119 |
| 0.0714118 | 1 | 607  | 17 | 0.0095867  |
| 0.0464011 | 1 | 459  | 12 | 0.0095867  |
| 0.06      | 1 | 510  | 14 | 0.00911001 |
| 0.0791765 | 1 | 673  | 19 | 0.00871277 |
| 0.0741176 | 1 | 630  | 15 | 0.00563196 |
| 0.0910588 | 1 | 774  | 22 | 0.00662065 |
| 0.0738824 | 1 | 628  | 18 | 0.00448438 |
| 0.0765252 | 1 | 651  | 14 | 0.00608217 |
| 0.0586456 | 1 | 504  | 14 | 0.00623224 |
| 0.0767059 | 1 | 652  | 16 | 0.00971028 |
| 0.0580571 | 1 | 557  | 16 | 0.00977207 |
| 0.0608964 | 1 | 553  | 13 | 0.00999276 |
| 0.0596376 | 1 | 599  | 16 | 0.0076976  |
| 0.0580672 | 1 | 569  | 17 | 0.00977207 |
| 0.0696864 | 1 | 600  | 17 | 0.00850091 |
| 0.0275247 | 1 | 589  | 15 | 0.00829788 |
| 0.0319174 | 1 | 683  | 19 | 0.00482866 |
| 0.0698751 | 1 | 604  | 17 | 0.00911884 |
| 0.0379397 | 1 | 604  | 17 | 0.00911884 |
| 0.0756579 | 1 | 644  | 18 | 0.00812133 |
| 0.0637497 | 1 | 593  | 17 | 0.00521707 |
| 0.0443361 | 1 | 382  | 11 | 0.00859801 |
| 0.0679209 | 1 | 639  | 18 | 0.00832436 |
| 0.0628064 | 1 | 538  | 12 | 0.00706202 |
| 0.0741465 | 1 | 758  | 19 | 0.00542893 |
| 0.0789396 | 1 | 807  | 23 | 0.0041048  |
| 0.0802353 | 1 | 682  | 15 | 0.00914532 |
| 0.068064  | 1 | 604  | 15 | 0.009622   |
| 0.0741492 | 1 | 658  | 18 | 0.0065412  |

|           |   |      |    |            |
|-----------|---|------|----|------------|
| 0.0827059 | 1 | 703  | 20 | 0.00986035 |
| 0.0827059 | 1 | 703  | 20 | 0.00986035 |
| 0.0919662 | 1 | 783  | 23 | 0.00619692 |
| 0.0531949 | 1 | 656  | 18 | 0.00783002 |
| 0.0752878 | 1 | 641  | 12 | 0.00886284 |
| 0.049627  | 1 | 612  | 15 | 0.00773291 |
| 0.0462212 | 1 | 570  | 10 | 0.00909235 |
| 0.128118  | 1 | 1089 | 26 | 0.00611748 |
| 0.0829412 | 1 | 705  | 20 | 0.00772409 |
| 0.0555459 | 1 | 639  | 18 | 0.00885401 |
| 0.0751765 | 1 | 639  | 18 | 0.00885401 |
| 0.085604  | 1 | 732  | 21 | 0.00431666 |
| 0.096907  | 1 | 824  | 22 | 0.00547307 |
| 0.0729412 | 1 | 620  | 18 | 0.00737981 |
| 0.0901176 | 1 | 766  | 19 | 0.0039459  |
| 0.0875029 | 1 | 766  | 19 | 0.0039459  |
| 0.069552  | 1 | 593  | 16 | 0.0065412  |
| 0.0966456 | 1 | 824  | 18 | 0.00397239 |
| 0.140197  | 1 | 1408 | 38 | 0.00448438 |
| 0.0925558 | 1 | 792  | 21 | 0.00539362 |
| 0.0799712 | 1 | 777  | 19 | 0.00782119 |
| 0.0778823 | 1 | 662  | 18 | 0.00879222 |
| 0.0837647 | 1 | 712  | 20 | 0.00652354 |
| 0.0758592 | 1 | 735  | 21 | 0.00515528 |
| 0.0499354 | 1 | 425  | 12 | 0.00716795 |
| 0.0283251 | 1 | 772  | 19 | 0.0041048  |
| 0.0657861 | 1 | 772  | 19 | 0.0041048  |
| 0.0735081 | 1 | 659  | 19 | 0.00402535 |
| 0.155435  | 1 | 1400 | 34 | 0.00527003 |
| 0.0826024 | 1 | 744  | 21 | 0.00428135 |
| 0.0978824 | 1 | 832  | 23 | 0.00414011 |
| 0.138471  | 1 | 1177 | 30 | 0.00503169 |
| 0.0439984 | 1 | 673  | 18 | 0.00520824 |
| 0.0856471 | 1 | 728  | 21 | 0.00595858 |
| 0.03827   | 1 | 638  | 18 | 0.00681485 |
| 0.0848924 | 1 | 726  | 20 | 0.00462562 |
| 0.114588  | 1 | 974  | 27 | 0.00754754 |
| 0.138824  | 1 | 1180 | 32 | 0.00779471 |
| 0.101059  | 1 | 859  | 24 | 0.00449321 |
| 0.0701176 | 1 | 596  | 12 | 0.00982504 |
| 0.0771765 | 1 | 656  | 18 | 0.00863332 |
| 0.0709412 | 1 | 603  | 17 | 0.00825374 |
| 0.036043  | 1 | 603  | 17 | 0.00965731 |
| 0.0989088 | 1 | 843  | 23 | 0.00456383 |
| 0.123882  | 1 | 1053 | 22 | 0.00861567 |
| 0.10567   | 1 | 915  | 25 | 0.0065412  |
| 0.0780167 | 1 | 664  | 19 | 0.00503169 |

|           |   |      |    |            |
|-----------|---|------|----|------------|
| 0.0752903 | 1 | 642  | 13 | 0.00685016 |
| 0.0743743 | 1 | 633  | 18 | 0.00751223 |
| 0.0674118 | 1 | 573  | 15 | 0.00841263 |
| 0.0744706 | 1 | 633  | 18 | 0.00882753 |
| 0.0703529 | 1 | 598  | 17 | 0.00949842 |
| 0.0751765 | 1 | 639  | 18 | 0.00865098 |
| 0.0708235 | 1 | 602  | 17 | 0.0082096  |
| 0.0725882 | 1 | 617  | 12 | 0.0092689  |
| 0.0688692 | 1 | 592  | 13 | 0.00714147 |
| 0.0894377 | 1 | 851  | 23 | 0.00840381 |
| 0.0689858 | 1 | 587  | 16 | 0.00580851 |
| 0.08      | 1 | 680  | 18 | 0.0064794  |
| 0.0742343 | 1 | 635  | 18 | 0.0070532  |
| 0.061551  | 1 | 604  | 17 | 0.00895111 |
| 0.0686844 | 1 | 674  | 19 | 0.00643527 |
| 0.0676753 | 1 | 577  | 12 | 0.009622   |
| 0.0677151 | 1 | 577  | 12 | 0.009622   |
| 0.0476464 | 1 | 664  | 19 | 0.00592327 |
| 0.106235  | 1 | 903  | 23 | 0.00402535 |
| 0.0407502 | 1 | 604  | 16 | 0.00619692 |
| 0.0431116 | 1 | 639  | 15 | 0.00772409 |
| 0.0669412 | 1 | 569  | 16 | 0.00790946 |
| 0.07      | 1 | 595  | 16 | 0.00844794 |
| 0.0749412 | 1 | 637  | 18 | 0.00895994 |
| 0.0498532 | 1 | 849  | 23 | 0.00923359 |
| 0.0595056 | 1 | 585  | 16 | 0.00637347 |
| 0.0725712 | 1 | 617  | 13 | 0.0083685  |
| 0.0804706 | 1 | 684  | 19 | 0.00923359 |
| 0.0340652 | 1 | 588  | 17 | 0.0068943  |
| 0.110588  | 1 | 940  | 26 | 0.00737981 |
| 0.0837825 | 1 | 715  | 20 | 0.00535831 |
| 0.0717647 | 1 | 610  | 18 | 0.00983387 |
| 0.078     | 1 | 663  | 19 | 0.00677071 |
| 0.0738737 | 1 | 628  | 15 | 0.00650589 |
| 0.063169  | 1 | 537  | 14 | 0.00798891 |
| 0.0630578 | 1 | 537  | 14 | 0.00798891 |
| 0.0911765 | 1 | 775  | 13 | 0.00988683 |
| 0.0801177 | 1 | 681  | 18 | 0.00643527 |
| 0.0849412 | 1 | 722  | 20 | 0.00660299 |
| 0.130235  | 1 | 1107 | 30 | 0.0083685  |
| 0.115765  | 1 | 984  | 27 | 0.00975442 |
| 0.0703529 | 1 | 598  | 10 | 0.00681485 |
| 0.0864706 | 1 | 735  | 18 | 0.00899525 |
| 0.0896471 | 1 | 762  | 22 | 0.00701788 |
| 0.0848619 | 1 | 731  | 20 | 0.00998393 |
| 0.0709412 | 1 | 603  | 16 | 0.00530534 |
| 0.0689776 | 1 | 591  | 17 | 0.00764464 |

|           |   |      |    |            |
|-----------|---|------|----|------------|
| 0.0513024 | 1 | 646  | 12 | 0.00745043 |
| 0.0688063 | 1 | 596  | 12 | 0.00764464 |
| 0.0722353 | 1 | 614  | 18 | 0.00682368 |
| 0.0736471 | 1 | 626  | 17 | 0.00820077 |
| 0.0284001 | 1 | 611  | 16 | 0.00503169 |
| 0.0718824 | 1 | 611  | 16 | 0.00503169 |
| 0.0697647 | 1 | 593  | 17 | 0.00539362 |
| 0.0690866 | 1 | 590  | 16 | 0.00589679 |
| 0.0705882 | 1 | 600  | 14 | 0.00647058 |
| 0.0695294 | 1 | 591  | 17 | 0.005835   |
| 0.0755294 | 1 | 642  | 18 | 0.00971028 |
| 0.0412825 | 1 | 609  | 12 | 0.00946311 |
| 0.0450419 | 1 | 1032 | 28 | 0.00813015 |
| 0.0204696 | 1 | 469  | 11 | 0.00797126 |
| 0.0682619 | 1 | 1007 | 27 | 0.00535831 |
| 0.0722353 | 1 | 614  | 15 | 0.0068943  |
| 0.0727059 | 1 | 618  | 17 | 0.00876573 |
| 0.0323739 | 1 | 631  | 19 | 0.00625872 |
| 0.046     | 1 | 391  | 10 | 0.00923359 |
| 0.0617647 | 1 | 525  | 15 | 0.0091718  |
| 0.0269657 | 1 | 855  | 22 | 0.00572024 |
| 0.0935756 | 1 | 855  | 22 | 0.00572024 |
| 0.0255464 | 1 | 810  | 22 | 0.00576437 |
| 0.0970908 | 1 | 831  | 24 | 0.00704437 |
| 0.0358286 | 1 | 593  | 17 | 0.00908353 |
| 0.0412941 | 1 | 351  | 10 | 0.00985152 |
| 0.0717877 | 1 | 614  | 17 | 0.00733567 |
| 0.0569001 | 1 | 971  | 27 | 0.00845677 |
| 0.0723529 | 1 | 615  | 17 | 0.00799774 |
| 0.0881523 | 1 | 750  | 18 | 0.00855387 |
| 0.0758824 | 1 | 645  | 11 | 0.00655885 |
| 0.0386451 | 1 | 591  | 13 | 0.0085627  |
| 0.0739764 | 1 | 645  | 18 | 0.00620575 |
| 0.106118  | 1 | 902  | 25 | 0.00973676 |
| 0.114824  | 1 | 976  | 21 | 0.00636465 |
| 0.0781893 | 1 | 665  | 17 | 0.00637347 |
| 0.0404463 | 1 | 348  | 10 | 0.00813015 |
| 0.0626116 | 1 | 631  | 16 | 0.0049699  |
| 0.0695946 | 1 | 618  | 15 | 0.0056761  |
| 0.0632002 | 1 | 598  | 17 | 0.004555   |
| 0.0935811 | 1 | 831  | 21 | 0.00896877 |
| 0.0720121 | 1 | 617  | 17 | 0.00896877 |
| 0.171335  | 1 | 1468 | 39 | 0.00531417 |
| 0.0679792 | 1 | 587  | 15 | 0.00934835 |
| 0.0749412 | 1 | 637  | 18 | 0.00980738 |
| 0.045396  | 1 | 388  | 11 | 0.00956021 |
| 0.0850588 | 1 | 723  | 20 | 0.00873925 |

|           |   |      |    |            |
|-----------|---|------|----|------------|
| 0.0644676 | 1 | 686  | 20 | 0.00602037 |
| 0.0792497 | 1 | 676  | 19 | 0.00528769 |
| 0.0653595 | 1 | 560  | 12 | 0.00617044 |
| 0.0410051 | 1 | 594  | 17 | 0.00902173 |
| 0.0689813 | 1 | 602  | 17 | 0.00773291 |
| 0.0450533 | 1 | 638  | 18 | 0.00489045 |
| 0.0827059 | 1 | 703  | 19 | 0.00497873 |
| 0.0582353 | 1 | 495  | 14 | 0.00903056 |
| 0.0923545 | 1 | 790  | 19 | 0.00729154 |
| 0.0724672 | 1 | 618  | 18 | 0.00553486 |
| 0.0764361 | 1 | 652  | 18 | 0.00764464 |
| 0.0767059 | 1 | 652  | 18 | 0.00764464 |
| 0.0763987 | 1 | 650  | 18 | 0.009878   |
| 0.0903233 | 1 | 785  | 22 | 0.00598506 |
| 0.0627375 | 1 | 710  | 15 | 0.00504052 |
| 0.0704706 | 1 | 599  | 17 | 0.00946311 |
| 0.0574321 | 1 | 590  | 17 | 0.00960435 |
| 0.0923275 | 1 | 787  | 22 | 0.00923359 |
| 0.0703782 | 1 | 603  | 15 | 0.00647058 |
| 0.0952941 | 1 | 810  | 20 | 0.00813898 |
| 0.0270223 | 1 | 613  | 10 | 0.00877456 |
| 0.104157  | 1 | 897  | 24 | 0.00585265 |
| 0.100814  | 1 | 879  | 24 | 0.00674423 |
| 0.0704706 | 1 | 599  | 17 | 0.00957787 |
| 0.0937647 | 1 | 797  | 21 | 0.00469624 |
| 0.0736211 | 1 | 626  | 18 | 0.00779471 |
| 0.0705882 | 1 | 600  | 17 | 0.00831553 |
| 0.138582  | 1 | 1181 | 33 | 0.00758285 |
| 0.0862353 | 1 | 733  | 20 | 0.0082096  |
| 0.0695294 | 1 | 591  | 17 | 0.00900408 |
| 0.0367337 | 1 | 619  | 17 | 0.00911001 |
| 0.0728235 | 1 | 619  | 18 | 0.0096838  |
| 0.0463571 | 1 | 593  | 17 | 0.00655885 |
| 0.0705579 | 1 | 602  | 17 | 0.00758285 |
| 0.110118  | 1 | 936  | 26 | 0.00565844 |
| 0.0834118 | 1 | 709  | 20 | 0.00922477 |
| 0.0828368 | 1 | 709  | 20 | 0.00922477 |
| 0.0725882 | 1 | 617  | 14 | 0.00973676 |
| 0.0692941 | 1 | 589  | 17 | 0.00960435 |
| 0.0797647 | 1 | 678  | 18 | 0.00498755 |
| 0.0702353 | 1 | 597  | 16 | 0.00984269 |
| 0.0698525 | 1 | 611  | 15 | 0.00944545 |
| 0.101035  | 1 | 859  | 18 | 0.00691195 |
| 0.0800268 | 1 | 716  | 20 | 0.00918063 |
| 0.0851348 | 1 | 764  | 19 | 0.00682368 |
| 0.0888235 | 1 | 755  | 21 | 0.00774174 |
| 0.057474  | 1 | 491  | 14 | 0.00920711 |



|           |          |     |    |            |
|-----------|----------|-----|----|------------|
| 0.0340153 | 1        | 838 | 24 | 0.00820077 |
| 0.0387644 | 1        | 955 | 27 | 0.00799774 |
| 0.0808235 | 1        | 687 | 20 | 0.00808601 |
| 0.0330095 | 1        | 598 | 17 | 0.00991331 |
| 0.0111098 | 0.16323  | 582 | 12 | 0.00474921 |
| 0.0683982 | 1        | 582 | 12 | 0.00474921 |
| 0.0922353 | 1        | 784 | 22 | 0.00849208 |
| 0.078393  | 1        | 681 | 19 | 0.00486397 |
| 0.0697647 | 1        | 593 | 17 | 0.00763581 |
| 0.0894118 | 1        | 760 | 22 | 0.00642644 |
| 0.0705869 | 1        | 605 | 17 | 0.00901291 |
| 0.0683848 | 1        | 605 | 17 | 0.00901291 |
| 0.0964706 | 1        | 820 | 23 | 0.0052259  |
| 0.102381  | 1        | 873 | 23 | 0.0064794  |
| 0.0696827 | 1        | 593 | 11 | 0.00956021 |
| 0.113059  | 1        | 961 | 24 | 0.00555251 |
| 0.0672992 | 1        | 610 | 18 | 0.00428135 |
| 0.0520005 | 1        | 824 | 23 | 0.00488162 |
| 0.0969412 | 1        | 824 | 23 | 0.00488162 |
| 0.0413354 | 1        | 655 | 18 | 0.00858918 |
| 0.0169412 | 0.219847 | 655 | 18 | 0.00858918 |
| 0.0709602 | 1        | 606 | 12 | 0.00858918 |
| 0.0531765 | 1        | 452 | 13 | 0.00681485 |
| 0.0695294 | 1        | 591 | 16 | 0.00918946 |
| 0.0873236 | 1        | 755 | 20 | 0.00486397 |
| 0.0709104 | 1        | 606 | 18 | 0.0083685  |
| 0.0697592 | 1        | 594 | 17 | 0.0080154  |
| 0.0725882 | 1        | 617 | 17 | 0.009622   |
| 0.107947  | 1        | 940 | 26 | 0.0052259  |
| 0.0711179 | 1        | 605 | 13 | 0.00737981 |
| 0.0648664 | 1        | 687 | 19 | 0.0061881  |
| 0.0850117 | 1        | 726 | 15 | 0.00918063 |
| 0.0947059 | 1        | 805 | 20 | 0.00515528 |
| 0.0546416 | 1        | 465 | 11 | 0.00981621 |
| 0.066     | 1        | 561 | 10 | 0.00977207 |
| 0.0825375 | 1        | 726 | 21 | 0.00656768 |
| 0.0725882 | 1        | 617 | 17 | 0.00730919 |
| 0.0710928 | 1        | 605 | 13 | 0.00528769 |
| 0.0705882 | 1        | 600 | 17 | 0.00825374 |
| 0.0612843 | 1        | 523 | 14 | 0.00598506 |
| 0.0714957 | 1        | 609 | 14 | 0.00986918 |
| 0.0839846 | 1        | 720 | 19 | 0.00616161 |
| 0.0723329 | 1        | 617 | 17 | 0.00867746 |
| 0.0703487 | 1        | 684 | 19 | 0.00866863 |
| 0.0709685 | 1        | 606 | 13 | 0.00619692 |
| 0.0729412 | 1        | 620 | 17 | 0.00495224 |
| 0.037163  | 1        | 776 | 22 | 0.00865098 |

|           |   |      |    |            |
|-----------|---|------|----|------------|
| 0.0367718 | 1 | 606  | 15 | 0.00835084 |
| 0.0896248 | 1 | 774  | 21 | 0.00657651 |
| 0.0801976 | 1 | 682  | 19 | 0.00625872 |
| 0.0702224 | 1 | 603  | 17 | 0.00975442 |
| 0.0916039 | 1 | 779  | 22 | 0.00799774 |
| 0.140777  | 1 | 1199 | 33 | 0.00652354 |
| 0.0708671 | 1 | 604  | 16 | 0.00986035 |
| 0.0697911 | 1 | 755  | 19 | 0.00458149 |
| 0.0682745 | 1 | 586  | 13 | 0.00712381 |
| 0.0753831 | 1 | 674  | 19 | 0.009622   |
| 0.0709412 | 1 | 603  | 15 | 0.00708851 |
| 0.0455294 | 1 | 387  | 11 | 0.00973676 |
| 0.0473855 | 1 | 599  | 17 | 0.00971028 |
| 0.0718824 | 1 | 611  | 14 | 0.0095867  |
| 0.0777647 | 1 | 661  | 18 | 0.00933952 |
| 0.0775458 | 1 | 661  | 18 | 0.00933952 |
| 0.0456608 | 1 | 624  | 18 | 0.00637347 |
| 0.0703961 | 1 | 599  | 17 | 0.00973676 |
| 0.101059  | 1 | 859  | 24 | 0.00505817 |
| 0.069371  | 1 | 590  | 17 | 0.00527003 |
| 0.0299614 | 1 | 707  | 20 | 0.00600272 |
| 0.0927059 | 1 | 788  | 19 | 0.00566727 |
| 0.0693405 | 1 | 593  | 15 | 0.00850974 |
| 0.0843078 | 1 | 721  | 20 | 0.00648823 |
| 0.0745882 | 1 | 634  | 15 | 0.00737099 |
| 0.0691687 | 1 | 634  | 15 | 0.00737099 |
| 0.0451775 | 1 | 593  | 16 | 0.0074063  |
| 0.0723638 | 1 | 619  | 16 | 0.00690313 |
| 0.0963529 | 1 | 819  | 18 | 0.00763581 |
| 0.11      | 1 | 935  | 23 | 0.00745926 |
| 0.0863529 | 1 | 734  | 21 | 0.00631168 |
| 0.0738824 | 1 | 628  | 13 | 0.00556134 |
| 0.0694118 | 1 | 590  | 12 | 0.00909235 |
| 0.0698449 | 1 | 608  | 17 | 0.00979856 |
| 0.0394705 | 1 | 656  | 16 | 0.00708851 |
| 0.0965882 | 1 | 821  | 23 | 0.00626754 |
| 0.0965882 | 1 | 821  | 23 | 0.00626754 |
| 0.0721176 | 1 | 613  | 17 | 0.00790946 |
| 0.100683  | 1 | 870  | 22 | 0.0060292  |
| 0.0834118 | 1 | 709  | 20 | 0.00819195 |
| 0.0377562 | 1 | 595  | 14 | 0.009622   |
| 0.120058  | 1 | 1892 | 52 | 0.00602037 |
| 0.0603138 | 1 | 619  | 15 | 0.00965731 |
| 0.0695281 | 1 | 1027 | 22 | 0.00469624 |
| 0.0718591 | 1 | 620  | 15 | 0.0079536  |
| 0.0775294 | 1 | 659  | 17 | 0.00980738 |
| 0.0715543 | 1 | 610  | 17 | 0.00976324 |

|           |          |     |    |            |
|-----------|----------|-----|----|------------|
| 0.038215  | 1        | 620 | 16 | 0.00771526 |
| 0.101294  | 1        | 861 | 25 | 0.00492576 |
| 0.101294  | 1        | 861 | 25 | 0.00492576 |
| 0.0852941 | 1        | 725 | 14 | 0.00605568 |
| 0.0852941 | 1        | 725 | 14 | 0.00605568 |
| 0.0480277 | 1        | 929 | 19 | 0.0043608  |
| 0.104818  | 1        | 929 | 19 | 0.0043608  |
| 0.0805598 | 0.924426 | 741 | 19 | 0.00550838 |
| 0.0860527 | 1        | 741 | 19 | 0.00550838 |
| 0.0601176 | 1        | 511 | 15 | 0.00973676 |
| 0.0744531 | 1        | 633 | 15 | 0.00479335 |
| 0.0747916 | 1        | 637 | 14 | 0.00996628 |
| 0.0743147 | 1        | 675 | 13 | 0.00783002 |
| 0.0399267 | 1        | 675 | 13 | 0.00783002 |
| 0.0856471 | 1        | 728 | 21 | 0.00733567 |
| 0.0783529 | 1        | 666 | 15 | 0.00568493 |
| 0.0741685 | 1        | 640 | 18 | 0.00504052 |
| 0.0538437 | 1        | 678 | 16 | 0.00476687 |
| 0.0716121 | 1        | 613 | 17 | 0.00584382 |
| 0.078367  | 1        | 668 | 19 | 0.00923359 |
| 0.0773327 | 1        | 668 | 19 | 0.00923359 |
| 0.0741436 | 1        | 632 | 15 | 0.00670009 |
| 0.0731651 | 1        | 632 | 15 | 0.00670009 |
| 0.0833333 | 1        | 714 | 19 | 0.00454618 |
| 0.0355465 | 1        | 575 | 12 | 0.00609099 |
| 0.0509397 | 1        | 824 | 23 | 0.00447556 |
| 0.0796471 | 1        | 677 | 19 | 0.00495224 |
| 0.0697621 | 1        | 604 | 12 | 0.00636465 |
| 0.0915916 | 1        | 793 | 18 | 0.00743278 |
| 0.0473996 | 1        | 967 | 25 | 0.00482866 |
| 0.0303907 | 1        | 620 | 16 | 0.00733567 |
| 0.0240055 | 0.472752 | 734 | 20 | 0.00520824 |
| 0.0573115 | 1        | 602 | 17 | 0.00773291 |
| 0.0416465 | 1        | 602 | 17 | 0.00773291 |
| 0.0707059 | 1        | 601 | 15 | 0.005067   |
| 0.101233  | 1        | 870 | 22 | 0.00616161 |
| 0.0655868 | 1        | 911 | 26 | 0.00528769 |
| 0.0780233 | 1        | 911 | 26 | 0.00528769 |
| 0.0733341 | 1        | 624 | 17 | 0.0092689  |
| 0.0713954 | 1        | 614 | 17 | 0.00721209 |
| 0.0719767 | 1        | 619 | 18 | 0.00935718 |
| 0.0434034 | 1        | 857 | 24 | 0.00431666 |
| 0.0385244 | 1        | 613 | 17 | 0.00932187 |
| 0.0493338 | 1        | 785 | 21 | 0.00919828 |
| 0.0932013 | 1        | 828 | 22 | 0.00417542 |
| 0.0701176 | 1        | 596 | 16 | 0.00943663 |
| 0.0676683 | 1        | 590 | 16 | 0.00802422 |

|           |   |      |    |            |
|-----------|---|------|----|------------|
| 0.0782619 | 1 | 670  | 19 | 0.00997511 |
| 0.0810588 | 1 | 689  | 20 | 0.0059321  |
| 0.0714874 | 1 | 608  | 16 | 0.00764464 |
| 0.0464993 | 1 | 613  | 17 | 0.00981621 |
| 0.0594218 | 1 | 666  | 18 | 0.00947194 |
| 0.0556745 | 1 | 624  | 16 | 0.00667361 |
| 0.071487  | 1 | 612  | 17 | 0.00996628 |
| 0.0767494 | 1 | 680  | 19 | 0.00799774 |
| 0.0852955 | 1 | 739  | 20 | 0.00781236 |
| 0.0649365 | 1 | 608  | 15 | 0.00981621 |
| 0.104235  | 1 | 886  | 20 | 0.00503169 |
| 0.0750789 | 1 | 642  | 18 | 0.00637347 |
| 0.0753521 | 1 | 642  | 18 | 0.00637347 |
| 0.0703529 | 1 | 598  | 17 | 0.00902173 |
| 0.0673294 | 1 | 596  | 17 | 0.00993097 |
| 0.0700106 | 1 | 596  | 17 | 0.00993097 |
| 0.0752077 | 1 | 860  | 24 | 0.00496107 |
| 0.100963  | 1 | 860  | 24 | 0.00496107 |
| 0.108042  | 1 | 927  | 25 | 0.00416659 |
| 0.091203  | 1 | 790  | 22 | 0.00946311 |
| 0.0480236 | 1 | 424  | 12 | 0.00538479 |
| 0.0839775 | 1 | 717  | 15 | 0.00882753 |
| 0.0615594 | 1 | 589  | 14 | 0.00700023 |
| 0.0831304 | 1 | 717  | 20 | 0.0065412  |
| 0.17      | 1 | 1445 | 39 | 0.00895111 |
| 0.107714  | 1 | 916  | 25 | 0.00431666 |
| 0.0491957 | 1 | 419  | 12 | 0.0089776  |
| 0.100866  | 1 | 862  | 24 | 0.0054201  |
| 0.0718193 | 1 | 617  | 12 | 0.00712381 |
| 0.0749147 | 1 | 637  | 18 | 0.00758285 |
| 0.0749412 | 1 | 637  | 18 | 0.00758285 |
| 0.0910588 | 1 | 774  | 21 | 0.0041048  |
| 0.0842167 | 1 | 723  | 20 | 0.00596741 |
| 0.0631765 | 1 | 537  | 11 | 0.00971028 |
| 0.0388427 | 1 | 537  | 11 | 0.00971028 |
| 0.104618  | 1 | 913  | 25 | 0.00607334 |
| 0.0689412 | 1 | 586  | 15 | 0.00848325 |
| 0.0729412 | 1 | 620  | 16 | 0.00927773 |
| 0.0675645 | 1 | 597  | 15 | 0.00640879 |
| 0.0702353 | 1 | 597  | 15 | 0.00640879 |
| 0.0974209 | 1 | 831  | 16 | 0.00819195 |
| 0.0477647 | 1 | 406  | 12 | 0.00999276 |
| 0.0954274 | 1 | 816  | 23 | 0.00466094 |
| 0.115765  | 1 | 984  | 26 | 0.00617044 |
| 0.086     | 1 | 731  | 21 | 0.0095867  |
| 0.0784882 | 1 | 1111 | 31 | 0.00655003 |
| 0.112572  | 1 | 959  | 24 | 0.00609982 |

|           |          |      |    |            |
|-----------|----------|------|----|------------|
| 0.104824  | 1        | 891  | 20 | 0.00520824 |
| 0.104824  | 1        | 891  | 20 | 0.00520824 |
| 0.0706636 | 1        | 607  | 16 | 0.00625872 |
| 0.0381822 | 1        | 615  | 14 | 0.00744161 |
| 0.0908235 | 1        | 772  | 22 | 0.00643527 |
| 0.0697892 | 1        | 596  | 17 | 0.00950725 |
| 0.0406652 | 1        | 604  | 11 | 0.00803305 |
| 0.0666191 | 1        | 654  | 17 | 0.00701788 |
| 0.0877647 | 1        | 746  | 21 | 0.00524355 |
| 0.0804746 | 1        | 685  | 19 | 0.00940132 |
| 0.081338  | 1        | 693  | 18 | 0.00961318 |
| 0.069371  | 1        | 590  | 17 | 0.00858918 |
| 0.0784199 | 1        | 673  | 20 | 0.00584382 |
| 0.0655314 | 1        | 608  | 17 | 0.0089158  |
| 0.102285  | 1        | 949  | 25 | 0.00835967 |
| 0.0821664 | 1        | 710  | 20 | 0.00703554 |
| 0.0878824 | 1        | 747  | 21 | 0.00927773 |
| 0.133201  | 1        | 1137 | 31 | 0.00504052 |
| 0.0702353 | 1        | 597  | 15 | 0.00984269 |
| 0.0181431 | 1        | 588  | 12 | 0.00842146 |
| 0.0570273 | 1        | 592  | 17 | 0.0092689  |
| 0.0722353 | 1        | 614  | 14 | 0.00847443 |
| 0.0718129 | 1        | 614  | 14 | 0.00847443 |
| 0.0740828 | 1        | 630  | 18 | 0.00832436 |
| 0.0931765 | 1        | 792  | 23 | 0.00624989 |
| 0.0871765 | 0.968627 | 765  | 22 | 0.00498755 |
| 0.110057  | 1        | 940  | 26 | 0.00531417 |
| 0.0758693 | 1        | 648  | 15 | 0.00832436 |
| 0.0479319 | 1        | 591  | 16 | 0.00874808 |
| 0.0689168 | 1        | 586  | 16 | 0.00959552 |
| 0.0565911 | 1        | 592  | 11 | 0.00662065 |
| 0.0712946 | 1        | 608  | 17 | 0.00843029 |
| 0.0574669 | 1        | 608  | 13 | 0.00759167 |
| 0.0472968 | 1        | 636  | 18 | 0.0056761  |
| 0.0649959 | 1        | 874  | 24 | 0.00645292 |
| 0.123765  | 1        | 1052 | 24 | 0.00803305 |
| 0.0952716 | 1        | 812  | 22 | 0.00520824 |
| 0.108118  | 1        | 919  | 24 | 0.00512879 |
| 0.0949412 | 1        | 807  | 22 | 0.00491693 |
| 0.0633458 | 1        | 543  | 11 | 0.00545541 |
| 0.0569295 | 1        | 488  | 11 | 0.00403418 |
| 0.0481704 | 1        | 441  | 12 | 0.00563196 |
| 0.0695268 | 1        | 598  | 15 | 0.00882753 |
| 0.0703033 | 1        | 598  | 15 | 0.00882753 |
| 0.0739146 | 1        | 635  | 15 | 0.0066383  |
| 0.0753987 | 1        | 643  | 18 | 0.00412246 |
| 0.0351193 | 1        | 643  | 18 | 0.00412246 |

|           |          |      |    |            |
|-----------|----------|------|----|------------|
| 0.115592  | 1        | 986  | 22 | 0.00613513 |
| 0.0759638 | 1        | 664  | 19 | 0.00495224 |
| 0.0398376 | 1        | 677  | 20 | 0.00627637 |
| 0.0989295 | 1        | 841  | 19 | 0.00957787 |
| 0.0632911 | 1        | 540  | 11 | 0.00922477 |
| 0.0321176 | 0.446078 | 612  | 15 | 0.00782119 |
| 0.0782353 | 1        | 665  | 19 | 0.00598506 |
| 0.079953  | 1        | 680  | 18 | 0.00825374 |
| 0.0728235 | 1        | 619  | 13 | 0.00721209 |
| 0.0727636 | 1        | 619  | 13 | 0.00721209 |
| 0.0652005 | 1        | 587  | 17 | 0.00903939 |
| 0.074975  | 1        | 675  | 16 | 0.00613513 |
| 0.0856941 | 1        | 729  | 20 | 0.00587031 |
| 0.0638121 | 1        | 614  | 16 | 0.00845677 |
| 0.0716955 | 1        | 614  | 16 | 0.00845677 |
| 0.0362043 | 1        | 599  | 17 | 0.00745926 |
| 0.055931  | 1        | 629  | 18 | 0.00807719 |
| 0.0864401 | 1        | 735  | 21 | 0.00623224 |
| 0.0778977 | 0.903401 | 735  | 21 | 0.00623224 |
| 0.112941  | 1        | 960  | 27 | 0.00497873 |
| 0.104972  | 1        | 893  | 25 | 0.00527003 |
| 0.0629996 | 1        | 599  | 17 | 0.00531417 |
| 0.075352  | 1        | 653  | 18 | 0.00919828 |
| 0.0914204 | 1        | 829  | 21 | 0.00504935 |
| 0.0906204 | 1        | 1170 | 33 | 0.00637347 |
| 0.132     | 1        | 1122 | 29 | 0.00412246 |
| 0.0758824 | 1        | 645  | 18 | 0.00655003 |
| 0.0863529 | 0.990553 | 741  | 21 | 0.00905704 |
| 0.0709412 | 1        | 603  | 17 | 0.00912766 |
| 0.0894261 | 1        | 762  | 22 | 0.00738864 |
| 0.0941715 | 1        | 803  | 21 | 0.00857153 |
| 0.0767059 | 1        | 652  | 18 | 0.00720326 |
| 0.0697647 | 1        | 593  | 17 | 0.0084656  |
| 0.0837647 | 1        | 712  | 20 | 0.004555   |
| 0.0730588 | 1        | 621  | 18 | 0.005067   |
| 0.0472169 | 1        | 615  | 13 | 0.00940132 |
| 0.0762353 | 1        | 648  | 18 | 0.00752988 |
| 0.0227927 | 1        | 602  | 12 | 0.00625872 |
| 0.0694118 | 1        | 590  | 17 | 0.0069914  |
| 0.0782353 | 1        | 665  | 19 | 0.00557017 |
| 0.104024  | 1        | 897  | 24 | 0.00564962 |
| 0.101176  | 1        | 860  | 24 | 0.00503169 |
| 0.0937099 | 1        | 803  | 19 | 0.00473156 |
| 0.0562427 | 1        | 673  | 18 | 0.00467859 |
| 0.0634297 | 1        | 759  | 22 | 0.00609982 |
| 0.0788577 | 1        | 671  | 19 | 0.00888932 |
| 0.088142  | 1        | 750  | 21 | 0.00633817 |

|           |          |      |    |            |
|-----------|----------|------|----|------------|
| 0.0684706 | 1        | 582  | 15 | 0.00827139 |
| 0.0597261 | 1        | 724  | 21 | 0.00504052 |
| 0.0712941 | 1        | 606  | 17 | 0.00901291 |
| 0.0654656 | 1        | 625  | 18 | 0.00916297 |
| 0.0777647 | 1        | 661  | 19 | 0.00930421 |
| 0.066     | 1        | 561  | 16 | 0.00885401 |
| 0.069211  | 0.994966 | 596  | 17 | 0.00714147 |
| 0.0918824 | 1        | 781  | 22 | 0.0095867  |
| 0.0395986 | 1        | 663  | 19 | 0.00503169 |
| 0.0390611 | 1        | 654  | 19 | 0.00805953 |
| 0.0706407 | 1        | 602  | 17 | 0.00630285 |
| 0.112     | 1        | 952  | 27 | 0.00890698 |
| 0.0843529 | 1        | 717  | 20 | 0.009622   |
| 0.0716471 | 1        | 609  | 17 | 0.00568493 |
| 0.0714453 | 1        | 609  | 17 | 0.00568493 |
| 0.0774118 | 1        | 658  | 18 | 0.00672658 |
| 0.0771938 | 1        | 658  | 18 | 0.00672658 |
| 0.0685882 | 1        | 583  | 16 | 0.00895111 |
| 0.126103  | 1        | 1072 | 30 | 0.00520824 |
| 0.0749412 | 1        | 637  | 17 | 0.00777705 |
| 0.0713531 | 1        | 608  | 17 | 0.00746809 |
| 0.0721492 | 1        | 615  | 17 | 0.00981621 |
| 0.0811331 | 1        | 716  | 19 | 0.00416659 |
| 0.101721  | 1        | 1076 | 25 | 0.00402535 |
| 0.114471  | 1        | 973  | 21 | 0.00829788 |
| 0.076     | 1        | 646  | 18 | 0.00969263 |
| 0.0801177 | 1        | 681  | 16 | 0.00913649 |
| 0.0788235 | 1        | 670  | 19 | 0.00924242 |
| 0.0715706 | 1        | 612  | 15 | 0.0083685  |
| 0.0861726 | 1        | 736  | 19 | 0.00634699 |
| 0.0867575 | 1        | 739  | 21 | 0.00427252 |
| 0.0863116 | 1        | 739  | 21 | 0.00427252 |
| 0.0697835 | 1        | 606  | 17 | 0.00860684 |
| 0.0643325 | 1        | 599  | 17 | 0.00668244 |
| 0.0847059 | 1        | 720  | 20 | 0.00935718 |
| 0.0690588 | 1        | 587  | 17 | 0.0073445  |
| 0.068824  | 1        | 587  | 15 | 0.00911001 |
| 0.0510357 | 1        | 648  | 13 | 0.00905704 |
| 0.128706  | 1        | 1094 | 27 | 0.00467859 |
| 0.0978824 | 1        | 832  | 22 | 0.00896877 |
| 0.119004  | 1        | 1032 | 28 | 0.00657651 |
| 0.0970588 | 1        | 825  | 21 | 0.00690313 |
| 0.0544751 | 1        | 493  | 14 | 0.00588796 |
| 0.072     | 1        | 612  | 17 | 0.00588796 |
| 0.109412  | 1        | 930  | 23 | 0.00630285 |
| 0.0720309 | 1        | 615  | 12 | 0.0092689  |
| 0.0862107 | 1        | 779  | 20 | 0.00392825 |

|           |   |      |    |            |
|-----------|---|------|----|------------|
| 0.0672864 | 1 | 608  | 17 | 0.00919828 |
| 0.0781376 | 1 | 678  | 17 | 0.00395473 |
| 0.0512597 | 1 | 588  | 14 | 0.00955139 |
| 0.0244204 | 1 | 948  | 22 | 0.00592327 |
| 0.0193715 | 1 | 752  | 21 | 0.00560548 |
| 0.0740292 | 1 | 795  | 21 | 0.00529652 |
| 0.0924311 | 1 | 795  | 21 | 0.00529652 |
| 0.039834  | 1 | 643  | 17 | 0.00469624 |
| 0.0707215 | 1 | 643  | 17 | 0.00469624 |
| 0.037013  | 1 | 628  | 15 | 0.00442259 |
| 0.0389047 | 1 | 628  | 15 | 0.00442259 |
| 0.0516296 | 1 | 876  | 24 | 0.00504935 |
| 0.0542684 | 1 | 876  | 24 | 0.00504935 |
| 0.0350681 | 1 | 595  | 17 | 0.00989566 |
| 0.0368604 | 1 | 595  | 17 | 0.00989566 |
| 0.0355963 | 1 | 668  | 19 | 0.00503169 |
| 0.102588  | 1 | 872  | 25 | 0.00935718 |
| 0.0591587 | 1 | 872  | 25 | 0.00935718 |
| 0.0736239 | 1 | 630  | 18 | 0.00713264 |
| 0.0366253 | 1 | 593  | 17 | 0.00746809 |
| 0.0660062 | 1 | 593  | 17 | 0.00746809 |
| 0.0368106 | 1 | 596  | 16 | 0.00731802 |
| 0.0663402 | 1 | 596  | 16 | 0.00731802 |
| 0.0419571 | 1 | 620  | 16 | 0.00961318 |
| 0.0454446 | 1 | 620  | 16 | 0.00961318 |
| 0.0871398 | 1 | 744  | 20 | 0.00541128 |
| 0.0743529 | 1 | 632  | 17 | 0.00489045 |
| 0.074222  | 1 | 632  | 17 | 0.00489045 |
| 0.0451888 | 1 | 626  | 18 | 0.0074063  |
| 0.0724286 | 1 | 626  | 18 | 0.0074063  |
| 0.0305349 | 1 | 842  | 24 | 0.00521707 |
| 0.0414387 | 1 | 356  | 10 | 0.00684133 |
| 0.0956797 | 1 | 815  | 23 | 0.00579969 |
| 0.0537433 | 1 | 458  | 13 | 0.00990449 |
| 0.0729412 | 1 | 620  | 17 | 0.00879222 |
| 0.0533453 | 1 | 952  | 27 | 0.0065412  |
| 0.0421383 | 1 | 752  | 21 | 0.00475804 |
| 0.0715629 | 1 | 609  | 13 | 0.00918063 |
| 0.0746181 | 1 | 635  | 13 | 0.00973676 |
| 0.068671  | 1 | 587  | 16 | 0.0090747  |
| 0.0366331 | 1 | 618  | 16 | 0.00829788 |
| 0.0274198 | 1 | 683  | 19 | 0.00630285 |
| 0.0404861 | 1 | 683  | 19 | 0.00630285 |
| 0.0405333 | 1 | 605  | 17 | 0.00960435 |
| 0.0353116 | 1 | 642  | 18 | 0.00518176 |
| 0.0926658 | 1 | 820  | 23 | 0.00510231 |
| 0.108183  | 1 | 1129 | 31 | 0.00657651 |



|           |   |      |    |            |
|-----------|---|------|----|------------|
| 0.0754534 | 1 | 932  | 26 | 0.00700023 |
| 0.0881176 | 1 | 749  | 20 | 0.00405183 |
| 0.0491388 | 1 | 893  | 25 | 0.00844794 |
| 0.0711681 | 1 | 605  | 12 | 0.0091718  |
| 0.14143   | 1 | 1203 | 28 | 0.00413128 |
| 0.0709412 | 1 | 603  | 17 | 0.00825374 |
| 0.106118  | 1 | 902  | 25 | 0.00528769 |
| 0.0961124 | 1 | 848  | 24 | 0.00402535 |
| 0.0741986 | 1 | 1081 | 30 | 0.00536714 |
| 0.127176  | 1 | 1081 | 30 | 0.00536714 |
| 0.0312993 | 1 | 456  | 13 | 0.00876573 |
| 0.0536471 | 1 | 456  | 13 | 0.00876573 |
| 0.0748235 | 1 | 636  | 17 | 0.00626754 |
| 0.0478689 | 1 | 593  | 17 | 0.00775057 |
| 0.0441569 | 1 | 628  | 18 | 0.00707968 |
| 0.0551458 | 1 | 628  | 18 | 0.00707968 |
| 0.0765882 | 1 | 651  | 17 | 0.00685899 |
| 0.0692761 | 1 | 869  | 22 | 0.00627637 |
| 0.0738216 | 1 | 628  | 16 | 0.00666478 |
| 0.0470017 | 1 | 678  | 19 | 0.00932187 |
| 0.0756326 | 1 | 1091 | 28 | 0.00528769 |
| 0.0852222 | 1 | 767  | 20 | 0.00514645 |
| 0.0584853 | 1 | 590  | 17 | 0.0064794  |
| 0.0707012 | 1 | 611  | 17 | 0.00632051 |
| 0.0872744 | 1 | 764  | 18 | 0.0076976  |
| 0.120936  | 1 | 1034 | 29 | 0.00560548 |
| 0.0490336 | 1 | 619  | 17 | 0.00469624 |
| 0.0710588 | 1 | 604  | 17 | 0.0093307  |
| 0.0714118 | 1 | 607  | 16 | 0.00768878 |
| 0.0695489 | 1 | 592  | 16 | 0.00758285 |
| 0.0636507 | 1 | 567  | 16 | 0.00919828 |
| 0.050302  | 1 | 608  | 28 | 0.00843029 |
| 0.109793  | 1 | 1009 | 28 | 0.00520824 |
| 0.0689412 | 1 | 586  | 17 | 0.00667361 |
| 0.0779326 | 1 | 671  | 19 | 0.0082096  |
| 0.102687  | 1 | 875  | 23 | 0.0054201  |
| 0.102941  | 1 | 875  | 23 | 0.0054201  |
| 0.0758127 | 1 | 646  | 17 | 0.0083685  |
| 0.0788547 | 1 | 672  | 19 | 0.00655885 |
| 0.0551788 | 1 | 480  | 14 | 0.00617044 |
| 0.0794344 | 1 | 691  | 19 | 0.00542893 |
| 0.0681688 | 1 | 593  | 16 | 0.00911001 |
| 0.11102   | 1 | 945  | 26 | 0.00526121 |
| 0.123176  | 1 | 1047 | 30 | 0.00879222 |
| 0.0722736 | 1 | 617  | 16 | 0.00829788 |
| 0.0718824 | 1 | 611  | 13 | 0.00534948 |
| 0.107498  | 1 | 919  | 26 | 0.00460797 |

|           |          |      |    |            |
|-----------|----------|------|----|------------|
| 0.0978824 | 1        | 832  | 22 | 0.00915415 |
| 0.12898   | 1        | 1106 | 28 | 0.00971028 |
| 0.0702538 | 1        | 598  | 11 | 0.00816546 |
| 0.0756763 | 1        | 649  | 18 | 0.0061881  |
| 0.0711765 | 1        | 605  | 11 | 0.0082096  |
| 0.0696471 | 1        | 592  | 17 | 0.0083685  |
| 0.100914  | 1        | 861  | 24 | 0.00564962 |
| 0.0742353 | 1        | 631  | 18 | 0.00876573 |
| 0.0989729 | 1        | 848  | 24 | 0.0085627  |
| 0.0685607 | 1        | 584  | 12 | 0.00782119 |
| 0.0723174 | 1        | 616  | 17 | 0.00576437 |
| 0.0700458 | 1        | 597  | 16 | 0.00954256 |
| 0.078876  | 1        | 814  | 23 | 0.00527003 |
| 0.0580426 | 1        | 599  | 16 | 0.00980738 |
| 0.0928235 | 1        | 789  | 17 | 0.00553486 |
| 0.075432  | 1        | 646  | 15 | 0.00922477 |
| 0.0861176 | 1        | 732  | 20 | 0.00625872 |
| 0.0859861 | 1        | 732  | 20 | 0.00625872 |
| 0.0715291 | 1        | 610  | 16 | 0.00828022 |
| 0.102422  | 1        | 871  | 24 | 0.00525238 |
| 0.102471  | 1        | 871  | 24 | 0.00525238 |
| 0.0809412 | 1        | 688  | 17 | 0.00778588 |
| 0.102353  | 1        | 1105 | 27 | 0.00619692 |
| 0.0711765 | 1        | 605  | 15 | 0.00986918 |
| 0.0755294 | 1        | 642  | 17 | 0.00837732 |
| 0.08441   | 1        | 784  | 21 | 0.00489045 |
| 0.0698824 | 1        | 594  | 17 | 0.00867746 |
| 0.0675294 | 1        | 574  | 14 | 0.00865098 |
| 0.0688602 | 1        | 586  | 10 | 0.00976324 |
| 0.0569351 | 1        | 509  | 14 | 0.0071503  |
| 0.0828235 | 1        | 704  | 17 | 0.00614396 |
| 0.0426928 | 0.902121 | 613  | 11 | 0.00956021 |
| 0.0717967 | 1        | 613  | 11 | 0.00956021 |
| 0.0779967 | 1        | 665  | 19 | 0.0054201  |
| 0.0864706 | 1        | 735  | 21 | 0.00512879 |
| 0.0484279 | 1        | 593  | 16 | 0.00841263 |
| 0.0629653 | 1        | 812  | 23 | 0.00587031 |
| 0.114731  | 1        | 979  | 24 | 0.00585265 |
| 0.0769231 | 1        | 665  | 18 | 0.00655003 |
| 0.0715294 | 1        | 608  | 17 | 0.00742395 |
| 0.0709286 | 1        | 608  | 11 | 0.00913649 |
| 0.0699708 | 1        | 600  | 17 | 0.00768878 |
| 0.0815294 | 1        | 693  | 20 | 0.0064441  |
| 0.110182  | 1        | 988  | 25 | 0.00625872 |
| 0.0582445 | 1        | 497  | 14 | 0.00961318 |
| 0.0696938 | 1        | 594  | 13 | 0.00528769 |
| 0.0835294 | 1        | 710  | 20 | 0.00550838 |

|           |          |      |    |            |
|-----------|----------|------|----|------------|
| 0.0679461 | 1        | 655  | 11 | 0.00600272 |
| 0.0972986 | 1        | 832  | 22 | 0.00656768 |
| 0.0711545 | 1        | 612  | 16 | 0.00857153 |
| 0.0771012 | 1        | 666  | 19 | 0.00469624 |
| 0.0530134 | 1        | 687  | 18 | 0.00504052 |
| 0.0752941 | 1        | 640  | 18 | 0.00956021 |
| 0.117059  | 1        | 995  | 28 | 0.00635582 |
| 0.0907707 | 1        | 775  | 21 | 0.00504052 |
| 0.103879  | 1        | 889  | 22 | 0.0064794  |
| 0.0743943 | 1        | 654  | 18 | 0.00946311 |
| 0.0702703 | 1        | 598  | 17 | 0.00814781 |
| 0.0710588 | 1        | 604  | 17 | 0.00923359 |
| 0.0858349 | 1        | 732  | 20 | 0.00535831 |
| 0.0532048 | 1        | 596  | 17 | 0.00675306 |
| 0.069119  | 1        | 590  | 17 | 0.00564962 |
| 0.0526692 | 1        | 590  | 17 | 0.00564962 |
| 0.0767059 | 1        | 652  | 18 | 0.00634699 |
| 0.0655257 | 1        | 559  | 13 | 0.00943663 |
| 0.114     | 1        | 969  | 26 | 0.00467859 |
| 0.0664366 | 1        | 905  | 25 | 0.00584382 |
| 0.0698824 | 1        | 594  | 17 | 0.00797126 |
| 0.0705496 | 1        | 602  | 14 | 0.0095867  |
| 0.0708235 | 1        | 602  | 17 | 0.00765347 |
| 0.0717726 | 1        | 611  | 17 | 0.00564079 |
| 0.0615294 | 1        | 523  | 15 | 0.00671775 |
| 0.0658191 | 1        | 585  | 15 | 0.00964849 |
| 0.0479118 | 1        | 678  | 19 | 0.00403418 |
| 0.0462865 | 1        | 655  | 18 | 0.00817429 |
| 0.0722933 | 1        | 627  | 14 | 0.00684133 |
| 0.0315294 | 0.452703 | 592  | 11 | 0.00814781 |
| 0.0467646 | 1        | 589  | 12 | 0.00857153 |
| 0.0751886 | 1        | 947  | 27 | 0.00579086 |
| 0.0523224 | 1        | 659  | 16 | 0.00903056 |
| 0.109529  | 1        | 931  | 20 | 0.0065412  |
| 0.122955  | 1        | 1052 | 26 | 0.00397239 |
| 0.0931765 | 1        | 792  | 21 | 0.00497873 |
| 0.0764623 | 1        | 651  | 14 | 0.0095867  |
| 0.0705882 | 1        | 600  | 17 | 0.00966614 |
| 0.0392554 | 1        | 582  | 14 | 0.00982504 |
| 0.0714119 | 1        | 611  | 16 | 0.00970145 |
| 0.0750588 | 1        | 638  | 18 | 0.00598506 |
| 0.0867827 | 1        | 738  | 21 | 0.00531417 |
| 0.0703198 | 1        | 598  | 10 | 0.00634699 |
| 0.11121   | 1        | 996  | 28 | 0.00920711 |
| 0.0748919 | 1        | 641  | 18 | 0.00964849 |
| 0.0766436 | 1        | 654  | 18 | 0.00497873 |
| 0.0691765 | 1        | 588  | 17 | 0.00843912 |

|           |   |      |    |            |
|-----------|---|------|----|------------|
| 0.0680463 | 1 | 582  | 11 | 0.0089776  |
| 0.0706241 | 1 | 602  | 13 | 0.00737981 |
| 0.0799871 | 1 | 745  | 20 | 0.00547307 |
| 0.0737487 | 1 | 638  | 13 | 0.00758285 |
| 0.0701176 | 1 | 596  | 12 | 0.00805953 |
| 0.0373091 | 1 | 518  | 15 | 0.00719444 |
| 0.0480409 | 1 | 667  | 19 | 0.00742395 |
| 0.0738824 | 1 | 628  | 18 | 0.0082096  |
| 0.0467178 | 1 | 627  | 12 | 0.00629403 |
| 0.0694836 | 1 | 592  | 17 | 0.00992214 |
| 0.120265  | 1 | 1054 | 29 | 0.00434314 |
| 0.0359033 | 1 | 597  | 15 | 0.00619692 |
| 0.0875624 | 1 | 754  | 21 | 0.00621458 |
| 0.088508  | 1 | 754  | 21 | 0.00621458 |
| 0.0875507 | 1 | 756  | 21 | 0.0083067  |
| 0.0702614 | 1 | 602  | 11 | 0.00701788 |
| 0.0758288 | 1 | 645  | 18 | 0.00935718 |
| 0.0765432 | 1 | 651  | 17 | 0.00970145 |
| 0.0718563 | 1 | 612  | 18 | 0.00799774 |
| 0.12375   | 1 | 1064 | 22 | 0.00651472 |
| 0.0707965 | 1 | 616  | 14 | 0.00986035 |
| 0.0697892 | 1 | 596  | 12 | 0.00774174 |
| 0.0936343 | 1 | 809  | 22 | 0.0051641  |
| 0.0951765 | 1 | 809  | 22 | 0.0051641  |
| 0.0917112 | 1 | 790  | 20 | 0.00594975 |
| 0.0800328 | 1 | 683  | 20 | 0.00839498 |
| 0.0700175 | 1 | 599  | 17 | 0.00967497 |
| 0.0874118 | 1 | 743  | 18 | 0.00411363 |
| 0.0729541 | 1 | 731  | 18 | 0.00886284 |
| 0.0711221 | 1 | 630  | 18 | 0.00655003 |
| 0.088     | 1 | 748  | 18 | 0.0084656  |
| 0.0708235 | 1 | 602  | 17 | 0.00439611 |
| 0.0758979 | 1 | 1065 | 24 | 0.00448438 |
| 0.078726  | 1 | 702  | 17 | 0.00832436 |
| 0.0651564 | 1 | 581  | 14 | 0.00845677 |
| 0.0856471 | 1 | 728  | 20 | 0.00636465 |
| 0.0454118 | 1 | 386  | 11 | 0.0083685  |
| 0.0690588 | 1 | 587  | 16 | 0.00946311 |
| 0.0518824 | 1 | 441  | 13 | 0.00885401 |
| 0.089673  | 1 | 765  | 17 | 0.00545541 |
| 0.0684527 | 1 | 603  | 17 | 0.00832436 |
| 0.0722411 | 1 | 616  | 17 | 0.00752988 |
| 0.0707861 | 1 | 606  | 14 | 0.00414011 |
| 0.0792941 | 1 | 674  | 19 | 0.00959552 |
| 0.0701176 | 1 | 596  | 17 | 0.00813898 |
| 0.0658422 | 1 | 575  | 11 | 0.00708851 |
| 0.0928053 | 1 | 792  | 21 | 0.00834201 |

|           |   |      |    |            |
|-----------|---|------|----|------------|
| 0.107412  | 1 | 913  | 25 | 0.00425487 |
| 0.0569211 | 1 | 484  | 14 | 0.00989566 |
| 0.0698824 | 1 | 594  | 16 | 0.00756519 |
| 0.118586  | 1 | 1010 | 29 | 0.00528769 |
| 0.0599476 | 1 | 618  | 17 | 0.00920711 |
| 0.0814765 | 1 | 724  | 17 | 0.00627637 |
| 0.118927  | 1 | 1011 | 21 | 0.00675306 |
| 0.0793144 | 1 | 745  | 21 | 0.00521707 |
| 0.0903865 | 1 | 849  | 24 | 0.00579969 |
| 0.125727  | 1 | 1124 | 30 | 0.00469624 |
| 0.115436  | 1 | 1124 | 30 | 0.00469624 |
| 0.0690157 | 1 | 617  | 17 | 0.00737981 |
| 0.0818824 | 1 | 696  | 19 | 0.00435197 |
| 0.0731765 | 1 | 622  | 17 | 0.00690313 |
| 0.0641767 | 1 | 610  | 16 | 0.00685899 |
| 0.0916433 | 1 | 783  | 22 | 0.00519059 |
| 0.0778823 | 1 | 662  | 19 | 0.00858036 |
| 0.0717368 | 1 | 615  | 11 | 0.00502286 |
| 0.0713954 | 1 | 614  | 17 | 0.00759167 |
| 0.0405814 | 1 | 349  | 10 | 0.00831553 |
| 0.0696471 | 1 | 592  | 17 | 0.00671775 |
| 0.0721734 | 1 | 616  | 17 | 0.00848325 |
| 0.0854953 | 1 | 781  | 22 | 0.00798008 |
| 0.0936973 | 1 | 834  | 23 | 0.00427252 |
| 0.0715294 | 1 | 608  | 17 | 0.00700906 |
| 0.0781176 | 1 | 664  | 18 | 0.00721209 |
| 0.104706  | 1 | 890  | 25 | 0.00789181 |
| 0.0456471 | 1 | 388  | 11 | 0.00885401 |
| 0.0729412 | 1 | 620  | 14 | 0.0066383  |
| 0.0718824 | 1 | 611  | 17 | 0.00553486 |
| 0.105189  | 1 | 896  | 25 | 0.00632051 |
| 0.0282426 | 1 | 611  | 18 | 0.00973676 |
| 0.0680873 | 1 | 1473 | 42 | 0.0049081  |
| 0.0344365 | 1 | 745  | 21 | 0.00843029 |
| 0.0732477 | 1 | 627  | 18 | 0.00805071 |
| 0.115421  | 1 | 988  | 28 | 0.00456383 |
| 0.0975782 | 1 | 830  | 17 | 0.00636465 |
| 0.0752941 | 1 | 640  | 18 | 0.00828022 |
| 0.0684161 | 1 | 584  | 13 | 0.00985152 |
| 0.0718598 | 1 | 619  | 11 | 0.00710616 |
| 0.0682353 | 1 | 580  | 12 | 0.00636465 |
| 0.107412  | 1 | 913  | 23 | 0.00504052 |
| 0.0698824 | 1 | 594  | 17 | 0.00681485 |
| 0.0812941 | 1 | 691  | 16 | 0.00973676 |
| 0.0703215 | 1 | 608  | 15 | 0.00637347 |
| 0.0991831 | 1 | 862  | 23 | 0.00566727 |
| 0.0881176 | 1 | 749  | 21 | 0.0078565  |

|           |          |      |    |            |
|-----------|----------|------|----|------------|
| 0.0707059 | 1        | 601  | 17 | 0.00664713 |
| 0.0710004 | 1        | 604  | 12 | 0.00747692 |
| 0.0949806 | 1        | 808  | 23 | 0.00489045 |
| 0.0700608 | 1        | 611  | 16 | 0.009622   |
| 0.0904411 | 1        | 773  | 19 | 0.0054819  |
| 0.120588  | 1        | 1025 | 25 | 0.00841263 |
| 0.0371522 | 1        | 657  | 15 | 0.00578203 |
| 0.0342683 | 1        | 606  | 17 | 0.0066383  |
| 0.0134118 | 0.186275 | 612  | 11 | 0.00919828 |
| 0.0346076 | 1        | 612  | 11 | 0.00919828 |
| 0.0714286 | 1        | 646  | 18 | 0.00632934 |
| 0.0744706 | 1        | 633  | 18 | 0.0097809  |
| 0.126863  | 1        | 1081 | 28 | 0.00643527 |
| 0.0884873 | 1        | 754  | 20 | 0.00651472 |
| 0.0798448 | 1        | 679  | 15 | 0.00531417 |
| 0.076     | 1        | 646  | 17 | 0.00696492 |
| 0.0808235 | 1        | 687  | 15 | 0.00848325 |
| 0.0702219 | 1        | 690  | 20 | 0.00505817 |
| 0.0965882 | 1        | 821  | 23 | 0.00503169 |
| 0.112333  | 1        | 960  | 24 | 0.00598506 |
| 0.07      | 1        | 595  | 16 | 0.00717678 |
| 0.0437035 | 1        | 717  | 20 | 0.0065412  |
| 0.0746844 | 1        | 639  | 18 | 0.00629403 |
| 0.0667921 | 1        | 639  | 18 | 0.00629403 |
| 0.0677887 | 1        | 580  | 16 | 0.00857153 |
| 0.0606251 | 1        | 580  | 16 | 0.00857153 |
| 0.079827  | 1        | 683  | 19 | 0.00798891 |
| 0.0371067 | 0.519766 | 683  | 19 | 0.00798891 |
| 0.0796897 | 1        | 678  | 19 | 0.0079536  |
| 0.0816878 | 1        | 695  | 20 | 0.00688547 |
| 0.0722353 | 1        | 614  | 17 | 0.00885401 |
| 0.080878  | 1        | 689  | 20 | 0.00972794 |
| 0.0472337 | 1        | 607  | 17 | 0.00448438 |
| 0.071395  | 1        | 607  | 17 | 0.00448438 |
| 0.0462221 | 1        | 594  | 17 | 0.00717678 |
| 0.0698659 | 1        | 594  | 17 | 0.00717678 |
| 0.0695294 | 1        | 591  | 15 | 0.00642644 |
| 0.0705882 | 1        | 600  | 17 | 0.00922477 |
| 0.0704686 | 1        | 603  | 16 | 0.00807719 |
| 0.0715294 | 1        | 608  | 17 | 0.00875691 |
| 0.0759893 | 1        | 651  | 19 | 0.00498755 |
| 0.0703617 | 1        | 603  | 17 | 0.00854505 |
| 0.0825117 | 1        | 703  | 19 | 0.0047139  |
| 0.0686186 | 1        | 764  | 21 | 0.00619692 |
| 0.0984252 | 1        | 850  | 23 | 0.00496107 |
| 0.0736953 | 1        | 627  | 11 | 0.0096838  |
| 0.110263  | 1        | 939  | 23 | 0.00617927 |

|           |          |     |    |            |
|-----------|----------|-----|----|------------|
| 0.0726867 | 1        | 619 | 17 | 0.00554369 |
| 0.08      | 1        | 680 | 19 | 0.00586148 |
| 0.0293078 | 1        | 605 | 17 | 0.00640879 |
| 0.0320257 | 1        | 658 | 18 | 0.00615279 |
| 0.038353  | 1        | 788 | 22 | 0.00598506 |
| 0.0389837 | 1        | 603 | 13 | 0.00864215 |
| 0.0702518 | 1        | 678 | 20 | 0.00513762 |
| 0.0687961 | 1        | 588 | 17 | 0.00717678 |
| 0.070656  | 1        | 601 | 17 | 0.00934835 |
| 0.0761815 | 1        | 648 | 18 | 0.00792712 |
| 0.0948631 | 1        | 807 | 16 | 0.00510231 |
| 0.0729412 | 1        | 620 | 15 | 0.0059321  |
| 0.0759553 | 1        | 646 | 18 | 0.00607334 |
| 0.0697456 | 1        | 595 | 16 | 0.00858918 |
| 0.0524244 | 1        | 586 | 15 | 0.00670009 |
| 0.0522455 | 1        | 584 | 15 | 0.00621458 |
| 0.0312436 | 1        | 455 | 13 | 0.00563196 |
| 0.0531815 | 1        | 453 | 13 | 0.00981621 |
| 0.0296461 | 0.416118 | 608 | 11 | 0.0089158  |
| 0.0714538 | 1        | 608 | 11 | 0.0089158  |
| 0.0704308 | 1        | 600 | 17 | 0.00944545 |
| 0.0688543 | 1        | 598 | 16 | 0.00737099 |
| 0.0788206 | 1        | 671 | 19 | 0.00909235 |
| 0.0818748 | 1        | 697 | 18 | 0.00619692 |
| 0.086     | 1        | 731 | 21 | 0.00515528 |
| 0.07      | 1        | 595 | 13 | 0.00779471 |
| 0.0715613 | 1        | 616 | 17 | 0.00995745 |
| 0.0740219 | 1        | 630 | 18 | 0.0041048  |
| 0.0717895 | 1        | 611 | 17 | 0.00411363 |
| 0.0900869 | 1        | 767 | 21 | 0.00523472 |
| 0.0899812 | 1        | 767 | 21 | 0.00523472 |
| 0.0718317 | 1        | 611 | 17 | 0.0064794  |
| 0.0611648 | 1        | 879 | 24 | 0.00737981 |
| 0.103412  | 1        | 879 | 24 | 0.00737981 |
| 0.0751994 | 1        | 641 | 12 | 0.00893346 |
| 0.0741943 | 1        | 640 | 14 | 0.00700023 |
| 0.0760818 | 1        | 647 | 18 | 0.00825374 |
| 0.0975925 | 1        | 831 | 23 | 0.00564079 |
| 0.0891368 | 1        | 759 | 21 | 0.00963966 |
| 0.0707059 | 1        | 601 | 16 | 0.00647058 |
| 0.0711804 | 1        | 635 | 18 | 0.00553486 |
| 0.108941  | 1        | 926 | 26 | 0.00621458 |
| 0.0534631 | 1        | 670 | 19 | 0.00448438 |
| 0.0477178 | 1        | 598 | 17 | 0.00773291 |
| 0.0758824 | 1        | 645 | 18 | 0.00999276 |
| 0.0703072 | 1        | 721 | 21 | 0.00632934 |
| 0.072     | 1        | 612 | 17 | 0.00742395 |

|           |   |      |    |            |
|-----------|---|------|----|------------|
| 0.0707059 | 1 | 601  | 17 | 0.00873925 |
| 0.0721176 | 1 | 613  | 17 | 0.00913649 |
| 0.0691765 | 1 | 588  | 17 | 0.00901291 |
| 0.0571448 | 1 | 829  | 22 | 0.00531417 |
| 0.0691765 | 1 | 588  | 17 | 0.00731802 |
| 0.107412  | 1 | 913  | 25 | 0.00515528 |
| 0.0688235 | 1 | 585  | 12 | 0.00777705 |
| 0.0889412 | 1 | 756  | 22 | 0.00520824 |
| 0.0689194 | 1 | 824  | 20 | 0.00466094 |
| 0.0499621 | 1 | 594  | 16 | 0.00973676 |
| 0.0710389 | 1 | 625  | 18 | 0.00587031 |
| 0.0745568 | 1 | 635  | 11 | 0.00947194 |
| 0.0778823 | 1 | 662  | 19 | 0.00531417 |
| 0.0730647 | 1 | 622  | 17 | 0.00980738 |
| 0.0880902 | 1 | 750  | 18 | 0.00949842 |
| 0.113647  | 1 | 966  | 25 | 0.00397239 |
| 0.0709335 | 1 | 614  | 18 | 0.00920711 |
| 0.0721843 | 1 | 614  | 18 | 0.00899525 |
| 0.0477054 | 1 | 605  | 17 | 0.00844794 |
| 0.100622  | 1 | 858  | 20 | 0.00655003 |
| 0.0685882 | 1 | 583  | 17 | 0.00828905 |
| 0.0727059 | 1 | 618  | 16 | 0.00799774 |
| 0.050842  | 1 | 631  | 18 | 0.00690313 |
| 0.070783  | 1 | 603  | 17 | 0.00949842 |
| 0.0727785 | 1 | 620  | 18 | 0.00981621 |
| 0.0930588 | 1 | 791  | 22 | 0.00587031 |
| 0.0704706 | 1 | 599  | 15 | 0.00979856 |
| 0.0922353 | 1 | 784  | 22 | 0.00742395 |
| 0.0957647 | 1 | 814  | 23 | 0.00585265 |
| 0.086219  | 1 | 737  | 20 | 0.00619692 |
| 0.0139775 | 1 | 594  | 15 | 0.00893346 |
| 0.014354  | 1 | 610  | 17 | 0.00996628 |
| 0.042672  | 1 | 642  | 17 | 0.00636465 |
| 0.0566337 | 1 | 642  | 17 | 0.00636465 |
| 0.0858757 | 1 | 1292 | 35 | 0.0063823  |
| 0.113973  | 1 | 1292 | 35 | 0.0063823  |
| 0.0714786 | 1 | 612  | 18 | 0.00741512 |
| 0.0807059 | 1 | 686  | 17 | 0.00633817 |
| 0.069871  | 1 | 596  | 17 | 0.00909235 |
| 0.0594118 | 1 | 505  | 14 | 0.00848325 |
| 0.0699018 | 1 | 605  | 17 | 0.00932187 |
| 0.0689412 | 1 | 586  | 10 | 0.00852739 |
| 0.0708434 | 1 | 1055 | 29 | 0.00560548 |
| 0.0756471 | 1 | 643  | 18 | 0.00677954 |
| 0.104727  | 1 | 895  | 23 | 0.00531417 |
| 0.0697647 | 1 | 593  | 17 | 0.00782119 |
| 0.0379442 | 1 | 615  | 15 | 0.00805071 |



|           |          |      |    |            |
|-----------|----------|------|----|------------|
| 0.0712941 | 1        | 606  | 17 | 0.00899525 |
| 0.0887143 | 1        | 768  | 21 | 0.00964849 |
| 0.124516  | 1        | 1061 | 29 | 0.00742395 |
| 0.072     | 1        | 612  | 17 | 0.00882753 |
| 0.0735294 | 1        | 625  | 18 | 0.0090747  |
| 0.0340749 | 1        | 654  | 18 | 0.00642644 |
| 0.0688235 | 0.894495 | 654  | 18 | 0.00642644 |
| 0.0302715 | 1        | 581  | 11 | 0.00986035 |
| 0.0683529 | 1        | 581  | 11 | 0.00986035 |
| 0.0931757 | 1        | 938  | 24 | 0.00825374 |
| 0.0731765 | 1        | 622  | 18 | 0.00908353 |
| 0.0754118 | 1        | 641  | 18 | 0.00536714 |
| 0.139059  | 1        | 1182 | 33 | 0.00514645 |
| 0.0819133 | 1        | 697  | 19 | 0.00627637 |
| 0.0792466 | 1        | 690  | 19 | 0.00594093 |
| 0.0310416 | 1        | 484  | 14 | 0.00860684 |
| 0.0567675 | 1        | 484  | 14 | 0.00860684 |
| 0.0734992 | 1        | 1146 | 32 | 0.00625872 |
| 0.134412  | 1        | 1146 | 32 | 0.00625872 |
| 0.0388019 | 1        | 605  | 17 | 0.00710616 |
| 0.0388016 | 1        | 632  | 12 | 0.00566727 |
| 0.08      | 1        | 680  | 19 | 0.00685899 |
| 0.0891765 | 1        | 758  | 20 | 0.00579969 |
| 0.0666363 | 1        | 585  | 16 | 0.00979856 |
| 0.0707685 | 1        | 605  | 12 | 0.00779471 |
| 0.0621931 | 1        | 608  | 16 | 0.00911001 |
| 0.0750174 | 1        | 648  | 14 | 0.00815664 |
| 0.0498651 | 1        | 425  | 12 | 0.00827139 |
| 0.0723529 | 1        | 615  | 17 | 0.0066383  |
| 0.0730588 | 1        | 621  | 17 | 0.00824491 |
| 0.0600443 | 1        | 515  | 13 | 0.00930421 |
| 0.0691335 | 1        | 596  | 16 | 0.00707968 |
| 0.08015   | 1        | 684  | 18 | 0.00876573 |
| 0.0450629 | 1        | 387  | 11 | 0.00708851 |
| 0.0559334 | 1        | 477  | 14 | 0.00973676 |
| 0.0715294 | 1        | 608  | 17 | 0.00783884 |
| 0.0797366 | 1        | 678  | 19 | 0.00779471 |
| 0.0675294 | 1        | 574  | 16 | 0.00992214 |
| 0.0711765 | 1        | 605  | 13 | 0.00825374 |
| 0.0690588 | 1        | 587  | 14 | 0.00707085 |
| 0.0715294 | 1        | 608  | 18 | 0.00848325 |
| 0.0777647 | 1        | 661  | 19 | 0.00850091 |
| 0.0887512 | 1        | 759  | 20 | 0.00407832 |
| 0.0698052 | 1        | 602  | 16 | 0.00971028 |
| 0.0715294 | 1        | 608  | 17 | 0.00839498 |
| 0.0801177 | 1        | 681  | 15 | 0.0083067  |
| 0.104763  | 1        | 893  | 25 | 0.0065412  |

|           |   |      |    |            |
|-----------|---|------|----|------------|
| 0.0685882 | 1 | 583  | 13 | 0.00977207 |
| 0.0715294 | 1 | 608  | 17 | 0.00617044 |
| 0.0787059 | 1 | 669  | 15 | 0.0057732  |
| 0.0393041 | 1 | 619  | 14 | 0.00909235 |
| 0.07      | 1 | 595  | 17 | 0.00970145 |
| 0.0691539 | 1 | 595  | 17 | 0.00970145 |
| 0.0360581 | 1 | 603  | 17 | 0.00758285 |
| 0.0926479 | 1 | 838  | 22 | 0.00449321 |
| 0.092852  | 1 | 895  | 24 | 0.00545541 |
| 0.125156  | 1 | 1105 | 30 | 0.00619692 |
| 0.0749002 | 1 | 638  | 18 | 0.00843029 |
| 0.0708951 | 1 | 617  | 17 | 0.00652354 |
| 0.0989731 | 1 | 1012 | 29 | 0.00538479 |
| 0.122471  | 1 | 1041 | 28 | 0.005579   |
| 0.0713041 | 1 | 614  | 12 | 0.00545541 |
| 0.100065  | 1 | 925  | 24 | 0.0041048  |
| 0.108099  | 1 | 925  | 24 | 0.0041048  |
| 0.0900652 | 1 | 815  | 23 | 0.00826257 |
| 0.126332  | 1 | 1079 | 30 | 0.00435197 |
| 0.0602254 | 1 | 791  | 21 | 0.00595858 |
| 0.0883168 | 1 | 765  | 21 | 0.00857153 |
| 0.0742178 | 1 | 631  | 17 | 0.00771526 |
| 0.0666276 | 1 | 569  | 13 | 0.00639996 |
| 0.0895126 | 1 | 775  | 22 | 0.00621458 |
| 0.109395  | 1 | 942  | 24 | 0.00569376 |
| 0.0751765 | 1 | 639  | 18 | 0.00859801 |
| 0.0712559 | 1 | 619  | 14 | 0.00944545 |
| 0.108118  | 1 | 919  | 25 | 0.00547307 |
| 0.0799906 | 1 | 680  | 19 | 0.00448438 |
| 0.0884945 | 1 | 753  | 21 | 0.00636465 |
| 0.0755294 | 1 | 642  | 12 | 0.00639113 |
| 0.0585855 | 1 | 608  | 17 | 0.00751223 |
| 0.0692941 | 1 | 589  | 12 | 0.00918063 |
| 0.130292  | 1 | 1111 | 27 | 0.00630285 |
| 0.130706  | 1 | 1111 | 27 | 0.00630285 |
| 0.0684706 | 1 | 582  | 17 | 0.00997511 |
| 0.0690588 | 1 | 587  | 16 | 0.00981621 |
| 0.0451677 | 1 | 687  | 18 | 0.00879222 |
| 0.0757609 | 1 | 687  | 18 | 0.00879222 |
| 0.0836546 | 1 | 716  | 18 | 0.00531417 |
| 0.0973265 | 1 | 830  | 21 | 0.00482866 |
| 0.0764637 | 1 | 653  | 19 | 0.004811   |
| 0.0766882 | 1 | 653  | 19 | 0.004811   |
| 0.0688525 | 1 | 588  | 16 | 0.00843029 |
| 0.0690546 | 1 | 588  | 16 | 0.00843029 |
| 0.110471  | 1 | 939  | 26 | 0.00586148 |
| 0.102     | 1 | 867  | 23 | 0.00623224 |

|           |         |      |    |            |
|-----------|---------|------|----|------------|
| 0.072148  | 1       | 616  | 14 | 0.00586148 |
| 0.0703529 | 1       | 598  | 17 | 0.0051641  |
| 0.0750909 | 1       | 640  | 14 | 0.00652354 |
| 0.0767059 | 1       | 652  | 18 | 0.00852739 |
| 0.0766608 | 1       | 652  | 18 | 0.00852739 |
| 0.0430391 | 1       | 652  | 18 | 0.00911001 |
| 0.0723881 | 1       | 652  | 18 | 0.00911001 |
| 0.0396726 | 1       | 601  | 17 | 0.00717678 |
| 0.0667259 | 1       | 601  | 17 | 0.00717678 |
| 0.0700578 | 1       | 606  | 17 | 0.00911884 |
| 0.0596689 | 1       | 847  | 21 | 0.00555251 |
| 0.0782353 | 1       | 665  | 19 | 0.005067   |
| 0.0608178 | 1       | 644  | 17 | 0.00585265 |
| 0.0723529 | 1       | 615  | 17 | 0.00584382 |
| 0.0914118 | 1       | 777  | 21 | 0.00630285 |
| 0.0702353 | 1       | 597  | 13 | 0.00894229 |
| 0.0356373 | 1       | 595  | 13 | 0.0069914  |
| 0.0698741 | 1       | 594  | 14 | 0.00922477 |
| 0.0697647 | 1       | 593  | 17 | 0.00954256 |
| 0.0692046 | 1       | 589  | 17 | 0.00978973 |
| 0.098883  | 1       | 841  | 23 | 0.00531417 |
| 0.0601027 | 1       | 597  | 17 | 0.00633817 |
| 0.0702353 | 1       | 597  | 17 | 0.00633817 |
| 0.0328979 | 1       | 345  | 10 | 0.00915415 |
| 0.032967  | 1       | 345  | 10 | 0.00915415 |
| 0.0702861 | 1       | 602  | 17 | 0.00685899 |
| 0.0825882 | 1       | 702  | 17 | 0.00655003 |
| 0.126622  | 1       | 1083 | 29 | 0.00572907 |
| 0.112435  | 1       | 1019 | 29 | 0.00635582 |
| 0.0945603 | 1       | 857  | 22 | 0.0064794  |
| 0.0765882 | 1       | 651  | 18 | 0.00636465 |
| 0.0747349 | 1       | 909  | 24 | 0.00657651 |
| 0.0107059 | 0.10011 | 909  | 24 | 0.00657651 |
| 0.0277186 | 1       | 651  | 17 | 0.00940132 |
| 0.0502591 | 1       | 611  | 15 | 0.00756519 |
| 0.0756471 | 1       | 643  | 18 | 0.00467859 |
| 0.0701176 | 1       | 596  | 17 | 0.0095867  |
| 0.0482599 | 1       | 1126 | 26 | 0.00462562 |
| 0.0291445 | 1       | 680  | 19 | 0.00771526 |
| 0.0799154 | 1       | 680  | 19 | 0.00771526 |
| 0.0538289 | 1       | 982  | 28 | 0.00486397 |
| 0.100118  | 1       | 851  | 24 | 0.00562313 |
| 0.0253966 | 1       | 602  | 17 | 0.00988683 |
| 0.0719559 | 1       | 614  | 17 | 0.00643527 |
| 0.067336  | 1       | 617  | 13 | 0.00955139 |
| 0.113353  | 1       | 972  | 23 | 0.00615279 |
| 0.0749412 | 1       | 637  | 18 | 0.00909235 |

|           |          |      |    |            |
|-----------|----------|------|----|------------|
| 0.0697568 | 1        | 608  | 12 | 0.00671775 |
| 0.0749801 | 1        | 659  | 18 | 0.00854505 |
| 0.0684107 | 1        | 659  | 18 | 0.00854505 |
| 0.0828308 | 1        | 728  | 15 | 0.00503169 |
| 0.0755735 | 1        | 728  | 15 | 0.00503169 |
| 0.0521973 | 1        | 582  | 14 | 0.00844794 |
| 0.0505919 | 1        | 671  | 17 | 0.00617927 |
| 0.116     | 1        | 986  | 22 | 0.00504052 |
| 0.100738  | 1        | 860  | 24 | 0.00549072 |
| 0.0113225 | 0.112791 | 860  | 24 | 0.00549072 |
| 0.0354456 | 1        | 589  | 17 | 0.00946311 |
| 0.0692941 | 1        | 589  | 17 | 0.00946311 |
| 0.0966036 | 1        | 822  | 23 | 0.00491693 |
| 0.0805693 | 1        | 685  | 14 | 0.00432549 |
| 0.0414118 | 1        | 352  | 10 | 0.00878339 |
| 0.0492188 | 1        | 419  | 12 | 0.00772409 |
| 0.0649964 | 1        | 729  | 20 | 0.00568493 |
| 0.0921024 | 1        | 849  | 24 | 0.00467859 |
| 0.0543311 | 1        | 991  | 27 | 0.00523472 |
| 0.0451206 | 1        | 823  | 21 | 0.00923359 |
| 0.0316886 | 1        | 578  | 16 | 0.00940132 |
| 0.0691796 | 1        | 947  | 26 | 0.00564079 |
| 0.0690588 | 1        | 587  | 13 | 0.00912766 |
| 0.153176  | 1        | 1302 | 33 | 0.0061881  |
| 0.0698824 | 1        | 594  | 17 | 0.00896877 |
| 0.084372  | 1        | 792  | 21 | 0.00960435 |
| 0.0633855 | 1        | 595  | 16 | 0.00700023 |
| 0.0874618 | 1        | 745  | 17 | 0.00397239 |
| 0.0694118 | 1        | 590  | 11 | 0.00732685 |
| 0.108266  | 1        | 947  | 24 | 0.00617927 |
| 0.111124  | 1        | 947  | 24 | 0.00617927 |
| 0.0604591 | 1        | 698  | 20 | 0.00457266 |
| 0.118531  | 1        | 1017 | 26 | 0.00517293 |
| 0.0707059 | 1        | 601  | 17 | 0.00538479 |
| 0.0785268 | 1        | 678  | 19 | 0.00579086 |
| 0.0745707 | 1        | 634  | 16 | 0.00602037 |
| 0.076     | 1        | 646  | 19 | 0.00591444 |
| 0.115519  | 1        | 990  | 28 | 0.00468742 |
| 0.0751809 | 1        | 644  | 11 | 0.00693844 |
| 0.0690507 | 1        | 587  | 10 | 0.00918063 |
| 0.0694754 | 1        | 592  | 11 | 0.0091718  |
| 0.0591949 | 1        | 647  | 18 | 0.00498755 |
| 0.0845054 | 1        | 721  | 20 | 0.00829788 |
| 0.0702353 | 1        | 597  | 17 | 0.00841263 |
| 0.0547812 | 1        | 621  | 16 | 0.00877456 |
| 0.0882802 | 1        | 751  | 18 | 0.00940132 |
| 0.0709412 | 1        | 603  | 17 | 0.00918063 |

|           |         |      |    |            |
|-----------|---------|------|----|------------|
| 0.0938824 | 1       | 798  | 21 | 0.00600272 |
| 0.0687023 | 1       | 585  | 11 | 0.00991331 |
| 0.0800845 | 1       | 682  | 19 | 0.00959552 |
| 0.0381554 | 0.47178 | 691  | 19 | 0.00932187 |
| 0.0803467 | 1       | 686  | 18 | 0.00758285 |
| 0.0710588 | 1       | 604  | 14 | 0.009878   |
| 0.036     | 1       | 549  | 16 | 0.00973676 |
| 0.0643913 | 1       | 549  | 16 | 0.00973676 |
| 0.0630588 | 1       | 536  | 15 | 0.00970145 |
| 0.069699  | 1       | 616  | 13 | 0.00517293 |
| 0.0894118 | 1       | 760  | 20 | 0.00805953 |
| 0.0737647 | 1       | 627  | 18 | 0.00939249 |
| 0.044194  | 1       | 996  | 20 | 0.00752988 |
| 0.0577915 | 1       | 616  | 11 | 0.0095249  |
| 0.0610751 | 1       | 651  | 17 | 0.0062852  |
| 0.0703529 | 1       | 598  | 13 | 0.009622   |
| 0.0210385 | 1       | 609  | 17 | 0.00920711 |
| 0.0340623 | 1       | 986  | 28 | 0.00651472 |
| 0.0609303 | 1       | 558  | 15 | 0.00938366 |
| 0.0493558 | 1       | 452  | 10 | 0.00915415 |
| 0.0792941 | 1       | 674  | 19 | 0.00657651 |
| 0.0704706 | 1       | 599  | 17 | 0.00979856 |
| 0.0770588 | 1       | 655  | 14 | 0.00647058 |
| 0.0741176 | 1       | 630  | 17 | 0.00935718 |
| 0.0542353 | 1       | 461  | 11 | 0.0088187  |
| 0.0790588 | 1       | 672  | 19 | 0.00701788 |
| 0.0763529 | 1       | 649  | 19 | 0.00899525 |
| 0.0737925 | 1       | 631  | 16 | 0.00634699 |
| 0.0994627 | 1       | 870  | 24 | 0.00865098 |
| 0.0690522 | 1       | 604  | 11 | 0.00980738 |
| 0.0795294 | 1       | 676  | 19 | 0.00625872 |
| 0.101765  | 1       | 865  | 22 | 0.00565844 |
| 0.0945535 | 1       | 809  | 20 | 0.005835   |
| 0.0742353 | 1       | 631  | 14 | 0.00945428 |
| 0.0507263 | 1       | 433  | 12 | 0.00737099 |
| 0.139162  | 1       | 1189 | 33 | 0.00558783 |
| 0.0711765 | 1       | 605  | 17 | 0.00869511 |
| 0.0597647 | 1       | 508  | 13 | 0.00782119 |
| 0.0716376 | 1       | 612  | 16 | 0.00868629 |
| 0.0464588 | 1       | 593  | 13 | 0.00690313 |
| 0.0839901 | 1       | 714  | 20 | 0.00981621 |
| 0.0754118 | 1       | 641  | 15 | 0.0084656  |
| 0.0600848 | 1       | 950  | 27 | 0.00520824 |
| 0.0758824 | 1       | 645  | 18 | 0.00790946 |
| 0.0718679 | 1       | 631  | 17 | 0.00493459 |
| 0.082     | 1       | 697  | 17 | 0.00624989 |
| 0.0819422 | 1       | 697  | 17 | 0.00624989 |

|           |   |      |    |            |
|-----------|---|------|----|------------|
| 0.0690743 | 1 | 591  | 16 | 0.00943663 |
| 0.0770588 | 1 | 655  | 18 | 0.00843912 |
| 0.0703225 | 1 | 604  | 17 | 0.00858036 |
| 0.0388792 | 1 | 605  | 16 | 0.00918946 |
| 0.0889071 | 1 | 759  | 18 | 0.00636465 |
| 0.0701858 | 1 | 597  | 14 | 0.00633817 |
| 0.0666469 | 1 | 675  | 19 | 0.00827139 |
| 0.0649684 | 1 | 658  | 17 | 0.00416659 |
| 0.0581749 | 1 | 612  | 17 | 0.00890698 |
| 0.072     | 1 | 612  | 17 | 0.00890698 |
| 0.093251  | 1 | 981  | 26 | 0.00565844 |
| 0.115412  | 1 | 981  | 26 | 0.00565844 |
| 0.105051  | 1 | 913  | 25 | 0.00651472 |
| 0.0536079 | 1 | 708  | 17 | 0.00489045 |
| 0.049849  | 1 | 809  | 22 | 0.00469624 |
| 0.0453637 | 1 | 386  | 11 | 0.00598506 |
| 0.189094  | 1 | 1616 | 37 | 0.00515528 |
| 0.0552306 | 1 | 746  | 21 | 0.00731802 |
| 0.072815  | 1 | 619  | 18 | 0.00886284 |
| 0.0815991 | 1 | 694  | 20 | 0.00432549 |
| 0.0649727 | 1 | 583  | 16 | 0.00971028 |
| 0.0647905 | 1 | 617  | 17 | 0.00755636 |
| 0.0949806 | 1 | 808  | 21 | 0.00659416 |
| 0.0712941 | 1 | 606  | 11 | 0.00847443 |
| 0.071202  | 1 | 606  | 11 | 0.00847443 |
| 0.0942666 | 1 | 804  | 22 | 0.00544658 |
| 0.0940321 | 1 | 802  | 22 | 0.0052259  |
| 0.0740072 | 1 | 656  | 18 | 0.00505817 |
| 0.0749412 | 1 | 637  | 18 | 0.00855387 |
| 0.0782582 | 1 | 753  | 20 | 0.00758285 |
| 0.0758824 | 1 | 645  | 15 | 0.00670009 |
| 0.0925882 | 1 | 787  | 19 | 0.00538479 |
| 0.0728878 | 1 | 710  | 20 | 0.00747692 |
| 0.103867  | 1 | 932  | 26 | 0.00564079 |
| 0.0723529 | 1 | 615  | 14 | 0.00992214 |
| 0.0707902 | 1 | 602  | 17 | 0.00826257 |
| 0.0720837 | 1 | 613  | 18 | 0.00712381 |
| 0.0707059 | 1 | 601  | 12 | 0.00745926 |
| 0.0813694 | 1 | 694  | 19 | 0.00692961 |
| 0.0863529 | 1 | 734  | 19 | 0.00531417 |
| 0.0705882 | 1 | 600  | 17 | 0.00867746 |
| 0.0438844 | 1 | 606  | 16 | 0.0092689  |
| 0.0809412 | 1 | 688  | 19 | 0.00616161 |
| 0.0702969 | 1 | 599  | 16 | 0.00990449 |
| 0.0765882 | 1 | 651  | 18 | 0.00515528 |
| 0.102118  | 1 | 868  | 24 | 0.00427252 |
| 0.0705882 | 1 | 600  | 17 | 0.00921594 |

|             |           |      |    |            |
|-------------|-----------|------|----|------------|
| 0.0653407   | 1         | 933  | 26 | 0.00953373 |
| 0.0641176   | 1         | 545  | 14 | 0.00745043 |
| 0.0916471   | 1         | 779  | 20 | 0.00911884 |
| 0.073762    | 1         | 779  | 20 | 0.00911884 |
| 0.0778356   | 1         | 853  | 24 | 0.00655003 |
| 0.0718824   | 1         | 611  | 13 | 0.00812133 |
| 0.076       | 1         | 646  | 18 | 0.00655885 |
| 0.0709412   | 1         | 603  | 17 | 0.009878   |
| 0.0567059   | 1         | 482  | 14 | 0.0074063  |
| 0.0771765   | 1         | 656  | 19 | 0.0084656  |
| 0.0718824   | 1         | 611  | 17 | 0.00973676 |
| 0.0696471   | 1         | 592  | 17 | 0.00912766 |
| 0.0703529   | 1         | 598  | 17 | 0.0094278  |
| 0.0683921   | 1         | 584  | 10 | 0.00883636 |
| 0.0831471   | 1         | 707  | 20 | 0.00861567 |
| 0.0702503   | 1         | 609  | 17 | 0.00684133 |
| 0.0716884   | 1         | 611  | 12 | 0.00909235 |
| 0.0717304   | 1         | 611  | 12 | 0.00909235 |
| 0.101176    | 1         | 860  | 23 | 0.00635582 |
| 0.0725882   | 1         | 617  | 18 | 0.0082096  |
| 0.100706    | 1         | 856  | 24 | 0.00505817 |
| 0.0690426   | 1         | 587  | 17 | 0.00841263 |
| 0.000798722 | 0.0107692 | 650  | 18 | 0.00565844 |
| 0.0697702   | 1         | 595  | 17 | 0.00959552 |
| 0.0397462   | 1         | 614  | 16 | 0.0095249  |
| 0.0736891   | 1         | 638  | 15 | 0.00893346 |
| 0.0601209   | 1         | 736  | 21 | 0.00657651 |
| 0.0393408   | 1         | 339  | 10 | 0.00736216 |
| 0.0720996   | 1         | 614  | 17 | 0.00809484 |
| 0.0767059   | 1         | 652  | 18 | 0.00787415 |
| 0.0635341   | 1         | 1079 | 30 | 0.00428135 |
| 0.0781677   | 1         | 686  | 20 | 0.00920711 |
| 0.0838687   | 1         | 731  | 21 | 0.00889815 |
| 0.0809099   | 1         | 690  | 17 | 0.00587031 |
| 0.0806075   | 1         | 690  | 17 | 0.00587031 |
| 0.0910588   | 1         | 774  | 22 | 0.00887167 |
| 0.105529    | 1         | 897  | 22 | 0.00637347 |
| 0.0904072   | 1         | 786  | 21 | 0.00758285 |
| 0.10666     | 1         | 908  | 25 | 0.00980738 |
| 0.106824    | 1         | 908  | 25 | 0.00980738 |
| 0.0817647   | 1         | 695  | 17 | 0.0076005  |
| 0.060076    | 1         | 601  | 18 | 0.00919828 |
| 0.0796471   | 1         | 677  | 19 | 0.00973676 |
| 0.0575147   | 1         | 822  | 21 | 0.00539362 |
| 0.0645882   | 1         | 549  | 16 | 0.00617044 |
| 0.0701176   | 1         | 596  | 13 | 0.0095249  |
| 0.0874118   | 1         | 743  | 21 | 0.00503169 |

|           |   |      |    |            |
|-----------|---|------|----|------------|
| 0.0205139 | 1 | 586  | 17 | 0.00874808 |
| 0.106941  | 1 | 909  | 23 | 0.00814781 |
| 0.0796616 | 1 | 678  | 14 | 0.00714147 |
| 0.0721176 | 1 | 613  | 17 | 0.00923359 |
| 0.0949412 | 1 | 807  | 23 | 0.00877456 |
| 0.0691765 | 1 | 588  | 17 | 0.00923359 |
| 0.0770588 | 1 | 655  | 11 | 0.00571141 |
| 0.0702353 | 1 | 597  | 17 | 0.00956021 |
| 0.117176  | 1 | 996  | 54 | 0.00877456 |
| 0.0789412 | 1 | 671  | 37 | 0.00755636 |
| 0.0644706 | 1 | 548  | 31 | 0.00912766 |
| 0.0641327 | 1 | 847  | 24 | 0.00538479 |
| 0.0148897 | 1 | 585  | 16 | 0.00758285 |
| 0.022729  | 1 | 893  | 25 | 0.00431666 |
| 0.0346654 | 1 | 707  | 20 | 0.00953373 |
| 0.0709412 | 1 | 603  | 17 | 0.0085627  |
| 0.0729412 | 1 | 620  | 17 | 0.00602037 |
| 0.0561176 | 1 | 477  | 13 | 0.00753871 |
| 0.0905674 | 1 | 771  | 21 | 0.00452852 |
| 0.0838717 | 1 | 714  | 19 | 0.00854505 |
| 0.0725882 | 1 | 617  | 17 | 0.00986918 |
| 0.0712941 | 1 | 606  | 17 | 0.00799774 |
| 0.0681176 | 1 | 579  | 16 | 0.00861567 |
| 0.0679577 | 1 | 579  | 16 | 0.00861567 |
| 0.0942353 | 1 | 801  | 22 | 0.00504052 |
| 0.119204  | 1 | 1018 | 26 | 0.00629403 |
| 0.0738656 | 1 | 630  | 18 | 0.00647058 |
| 0.105529  | 1 | 897  | 25 | 0.00845677 |
| 0.111765  | 1 | 950  | 26 | 0.00514645 |
| 0.0708235 | 1 | 602  | 17 | 0.00954256 |
| 0.0361936 | 1 | 596  | 13 | 0.00993097 |
| 0.074     | 1 | 629  | 18 | 0.00624989 |
| 0.0530041 | 1 | 614  | 11 | 0.00643527 |
| 0.0685649 | 1 | 602  | 12 | 0.00955139 |
| 0.0644706 | 1 | 548  | 15 | 0.00652354 |
| 0.0728235 | 1 | 619  | 11 | 0.00920711 |
| 0.065776  | 1 | 965  | 27 | 0.00925125 |
| 0.0964277 | 1 | 826  | 23 | 0.00486397 |
| 0.0745882 | 1 | 634  | 18 | 0.00793595 |
| 0.0745882 | 1 | 634  | 18 | 0.00957787 |
| 0.0276251 | 1 | 588  | 16 | 0.00956021 |
| 0.0556071 | 1 | 599  | 17 | 0.00890698 |
| 0.0752941 | 1 | 640  | 18 | 0.00660299 |
| 0.0410588 | 1 | 349  | 10 | 0.00906587 |
| 0.0688116 | 1 | 586  | 16 | 0.00926008 |
| 0.0726867 | 1 | 619  | 15 | 0.00434314 |
| 0.0695294 | 1 | 591  | 17 | 0.00920711 |



|            |           |      |    |            |
|------------|-----------|------|----|------------|
| 0.07       | 1         | 595  | 17 | 0.00710616 |
| 0.109294   | 1         | 929  | 25 | 0.00885401 |
| 0.0456822  | 1         | 602  | 16 | 0.00878339 |
| 0.116941   | 1         | 994  | 27 | 0.004555   |
| 0.123647   | 1         | 1051 | 27 | 0.00607334 |
| 0.0785882  | 1         | 668  | 17 | 0.00911001 |
| 0.176471   | 1         | 1500 | 38 | 0.00634699 |
| 0.0856471  | 1         | 728  | 18 | 0.00809484 |
| 0.107905   | 1         | 920  | 26 | 0.00457266 |
| 0.108      | 1         | 918  | 22 | 0.00985152 |
| 0.0762363  | 1         | 649  | 18 | 0.0063823  |
| 0.0690588  | 1         | 587  | 17 | 0.00971028 |
| 0.0734118  | 1         | 624  | 18 | 0.00515528 |
| 0.0525524  | 1         | 594  | 17 | 0.00912766 |
| 0.0733838  | 1         | 630  | 17 | 0.00685899 |
| 0.0737647  | 1         | 627  | 18 | 0.00902173 |
| 0.034392   | 1         | 627  | 18 | 0.00902173 |
| 0.0678534  | 1         | 587  | 17 | 0.00970145 |
| 0.123399   | 1         | 1050 | 21 | 0.0052259  |
| 0.080268   | 1         | 683  | 19 | 0.0048728  |
| 0.0696909  | 1         | 593  | 11 | 0.00799774 |
| 0.0992941  | 1         | 844  | 17 | 0.00966614 |
| 0.00481843 | 0.0485782 | 844  | 17 | 0.00966614 |
| 0.0837647  | 1         | 712  | 18 | 0.00764464 |
| 0.0519177  | 1         | 712  | 19 | 0.00966614 |
| 0.0794733  | 1         | 676  | 18 | 0.00553486 |
| 0.0474364  | 1         | 606  | 17 | 0.0091718  |
| 0.196693   | 1         | 1713 | 42 | 0.00458149 |
| 0.0774118  | 1         | 658  | 14 | 0.00639996 |
| 0.0616471  | 1         | 524  | 14 | 0.00609099 |
| 0.0909941  | 1         | 778  | 20 | 0.00617044 |
| 0.0696203  | 1         | 594  | 17 | 0.00946311 |
| 0.104397   | 1         | 888  | 24 | 0.0079536  |
| 0.0843966  | 1         | 721  | 20 | 0.00503169 |
| 0.0800891  | 1         | 683  | 20 | 0.00636465 |
| 0.0842353  | 1         | 716  | 20 | 0.00759167 |
| 0.0561811  | 1         | 479  | 14 | 0.00768878 |
| 0.0399606  | 1         | 649  | 16 | 0.00616161 |
| 0.0696916  | 1         | 705  | 20 | 0.00954256 |
| 0.0802628  | 1         | 684  | 19 | 0.00630285 |
| 0.0747059  | 1         | 635  | 18 | 0.00609099 |
| 0.110118   | 1         | 936  | 19 | 0.00655003 |
| 0.0737647  | 1         | 627  | 18 | 0.00631168 |
| 0.0790588  | 1         | 672  | 19 | 0.00763581 |
| 0.0718148  | 1         | 611  | 17 | 0.00887167 |
| 0.0902763  | 1         | 830  | 21 | 0.00643527 |
| 0.0308039  | 1         | 684  | 19 | 0.00453735 |

|           |          |      |    |            |
|-----------|----------|------|----|------------|
| 0.0716628 | 1        | 612  | 17 | 0.00996628 |
| 0.0718985 | 1        | 612  | 17 | 0.00996628 |
| 0.0771663 | 1        | 659  | 18 | 0.00827139 |
| 0.0774201 | 1        | 659  | 18 | 0.00827139 |
| 0.0709753 | 1        | 604  | 17 | 0.00889815 |
| 0.071395  | 1        | 607  | 13 | 0.00704437 |
| 0.0682938 | 1        | 582  | 12 | 0.00635582 |
| 0.0709759 | 1        | 616  | 12 | 0.00935718 |
| 0.0627059 | 1        | 533  | 12 | 0.00982504 |
| 0.096     | 1        | 816  | 21 | 0.00585265 |
| 0.0978007 | 1        | 836  | 21 | 0.00657651 |
| 0.09803   | 1        | 836  | 21 | 0.00657651 |
| 0.0671057 | 1        | 591  | 17 | 0.0082096  |
| 0.0687793 | 1        | 586  | 12 | 0.00798891 |
| 0.0871765 | 1        | 741  | 21 | 0.00411363 |
| 0.107644  | 1        | 921  | 25 | 0.00613513 |
| 0.0717647 | 1        | 610  | 17 | 0.0095249  |
| 0.0907832 | 1        | 983  | 20 | 0.0065412  |
| 0.0667059 | 1        | 567  | 16 | 0.00793595 |
| 0.0756382 | 1        | 643  | 16 | 0.00539362 |
| 0.0818414 | 1        | 704  | 17 | 0.00696492 |
| 0.133341  | 1        | 1147 | 31 | 0.00549955 |
| 0.0715876 | 1        | 611  | 17 | 0.00764464 |
| 0.0800705 | 1        | 681  | 15 | 0.00708851 |
| 0.0699589 | 1        | 595  | 13 | 0.00840381 |
| 0.0871394 | 1        | 746  | 21 | 0.00726506 |
| 0.0708235 | 1        | 602  | 17 | 0.00770643 |
| 0.124471  | 1        | 1058 | 27 | 0.00527003 |
| 0.0729888 | 1        | 959  | 27 | 0.00460797 |
| 0.0438459 | 1        | 617  | 17 | 0.00996628 |
| 0.0838323 | 1        | 714  | 15 | 0.00508466 |
| 0.0695294 | 1        | 591  | 15 | 0.00984269 |
| 0.0723529 | 1        | 615  | 16 | 0.00882753 |
| 0.0401142 | 1        | 590  | 17 | 0.00981621 |
| 0.0304596 | 1        | 448  | 13 | 0.00901291 |
| 0.0618449 | 0.986989 | 538  | 15 | 0.00971911 |
| 0.0728235 | 1        | 619  | 18 | 0.00888049 |
| 0.136972  | 1        | 1167 | 29 | 0.00432549 |
| 0.0747059 | 1        | 635  | 17 | 0.00671775 |
| 0.0705882 | 1        | 600  | 17 | 0.00997511 |
| 0.0692736 | 1        | 597  | 12 | 0.0069914  |
| 0.0239985 | 0.58021  | 667  | 19 | 0.00631168 |
| 0.0414672 | 1        | 667  | 19 | 0.00631168 |
| 0.0930588 | 1        | 791  | 22 | 0.00896877 |
| 0.075222  | 1        | 830  | 21 | 0.00932187 |
| 0.0743307 | 1        | 633  | 13 | 0.00861567 |
| 0.041173  | 1        | 351  | 10 | 0.00969263 |

|           |          |      |    |            |
|-----------|----------|------|----|------------|
| 0.0735294 | 1        | 625  | 18 | 0.00991331 |
| 0.0750588 | 1        | 638  | 17 | 0.00865098 |
| 0.0455294 | 0.649329 | 596  | 17 | 0.00761816 |
| 0.0897647 | 1        | 763  | 20 | 0.00971028 |
| 0.0391484 | 1        | 879  | 20 | 0.00619692 |
| 0.103412  | 1        | 879  | 20 | 0.00619692 |
| 0.0264553 | 1        | 594  | 13 | 0.00882753 |
| 0.0621285 | 1        | 763  | 18 | 0.00935718 |
| 0.0505659 | 1        | 621  | 13 | 0.00700023 |
| 0.101424  | 1        | 876  | 23 | 0.00547307 |
| 0.085099  | 1        | 735  | 21 | 0.00813015 |
| 0.0728235 | 1        | 619  | 17 | 0.00756519 |
| 0.0790588 | 1        | 672  | 19 | 0.00865098 |
| 0.100941  | 1        | 858  | 24 | 0.00626754 |
| 0.0698824 | 1        | 594  | 17 | 0.00831553 |
| 0.071571  | 1        | 610  | 14 | 0.00412246 |
| 0.0737955 | 1        | 628  | 18 | 0.00737099 |
| 0.0667346 | 1        | 589  | 10 | 0.00903056 |
| 0.0709328 | 1        | 603  | 17 | 0.00899525 |
| 0.102     | 1        | 867  | 24 | 0.00986918 |
| 0.07072   | 1        | 606  | 15 | 0.00921594 |
| 0.0656735 | 1        | 626  | 18 | 0.00586148 |
| 0.0687998 | 1        | 587  | 15 | 0.00922477 |
| 0.0794509 | 1        | 735  | 21 | 0.00641761 |
| 0.0678575 | 1        | 604  | 17 | 0.00990449 |
| 0.0690588 | 1        | 587  | 17 | 0.00927773 |
| 0.0711184 | 1        | 606  | 17 | 0.00912766 |
| 0.0718772 | 1        | 618  | 18 | 0.00637347 |
| 0.0494159 | 1        | 423  | 12 | 0.00873925 |
| 0.0819614 | 0.58769  | 1186 | 27 | 0.00464328 |
| 0.134865  | 1        | 1186 | 27 | 0.00464328 |
| 0.0701176 | 1        | 596  | 17 | 0.00835967 |
| 0.0731736 | 1        | 632  | 18 | 0.00896877 |
| 0.0712781 | 1        | 609  | 17 | 0.00670892 |
| 0.0725882 | 1        | 617  | 17 | 0.009622   |
| 0.0435816 | 1        | 587  | 17 | 0.00868629 |
| 0.0665231 | 1        | 896  | 25 | 0.00592327 |
| 0.0694118 | 1        | 590  | 17 | 0.00859801 |
| 0.0396388 | 1        | 619  | 18 | 0.00967497 |
| 0.183275  | 1        | 1578 | 33 | 0.00666478 |
| 0.0741385 | 1        | 639  | 18 | 0.00403418 |
| 0.0257427 | 1        | 610  | 15 | 0.00924242 |
| 0.0714118 | 1        | 607  | 17 | 0.00899525 |
| 0.0701176 | 1        | 596  | 17 | 0.00781236 |
| 0.0755333 | 1        | 648  | 17 | 0.00563196 |
| 0.0756471 | 1        | 643  | 19 | 0.00981621 |
| 0.0727463 | 1        | 627  | 17 | 0.00637347 |

|           |          |      |    |            |
|-----------|----------|------|----|------------|
| 0.0819021 | 1        | 701  | 19 | 0.00782119 |
| 0.0764354 | 1        | 651  | 17 | 0.00722092 |
| 0.0718824 | 1        | 611  | 13 | 0.00990449 |
| 0.0292862 | 1        | 679  | 19 | 0.00980738 |
| 0.0711244 | 1        | 618  | 15 | 0.00954256 |
| 0.102091  | 1        | 869  | 24 | 0.00549955 |
| 0.0916471 | 1        | 779  | 21 | 0.00632934 |
| 0.0719991 | 1        | 613  | 17 | 0.00850091 |
| 0.0516996 | 1        | 689  | 19 | 0.00981621 |
| 0.0810588 | 1        | 689  | 19 | 0.00981621 |
| 0.0540189 | 1        | 664  | 13 | 0.00587031 |
| 0.0776336 | 1        | 664  | 13 | 0.00587031 |
| 0.0819232 | 1        | 1007 | 27 | 0.0056761  |
| 0.117736  | 1        | 1007 | 27 | 0.0056761  |
| 0.0823902 | 1        | 728  | 21 | 0.00535831 |
| 0.0969412 | 1        | 824  | 20 | 0.00637347 |
| 0.0689655 | 1        | 590  | 17 | 0.00921594 |
| 0.0751765 | 1        | 639  | 18 | 0.00505817 |
| 0.106706  | 1        | 907  | 25 | 0.00848325 |
| 0.0703529 | 1        | 598  | 17 | 0.00739747 |
| 0.0696966 | 1        | 595  | 17 | 0.00810367 |
| 0.0828235 | 1        | 704  | 19 | 0.00603803 |
| 0.0682353 | 1        | 580  | 16 | 0.00999276 |
| 0.047592  | 1        | 419  | 12 | 0.00861567 |
| 0.0117647 | 0.169492 | 590  | 12 | 0.004555   |
| 0.0694118 | 1        | 590  | 12 | 0.004555   |
| 0.0465613 | 1        | 589  | 13 | 0.00821843 |
| 0.059399  | 1        | 589  | 13 | 0.00821843 |
| 0.0683715 | 1        | 893  | 25 | 0.00621458 |
| 0.082153  | 1        | 1073 | 23 | 0.00564079 |
| 0.0873398 | 1        | 743  | 20 | 0.00482866 |
| 0.100584  | 1        | 861  | 25 | 0.00535831 |
| 0.0748235 | 1        | 636  | 18 | 0.00778588 |
| 0.0705882 | 1        | 600  | 14 | 0.00757402 |
| 0.101622  | 1        | 871  | 24 | 0.00657651 |
| 0.0947161 | 1        | 1106 | 31 | 0.00623224 |
| 0.0654278 | 1        | 764  | 20 | 0.00653237 |
| 0.0571752 | 1        | 1110 | 31 | 0.00594975 |
| 0.0987545 | 1        | 1110 | 31 | 0.00594975 |
| 0.0755294 | 1        | 642  | 18 | 0.00749457 |
| 0.0486537 | 1        | 627  | 18 | 0.00854505 |
| 0.0703529 | 1        | 598  | 13 | 0.00588796 |
| 0.0898064 | 1        | 770  | 19 | 0.00421073 |
| 0.0899218 | 1        | 770  | 19 | 0.00421073 |
| 0.0622353 | 1        | 529  | 13 | 0.00723857 |
| 0.0870166 | 1        | 756  | 21 | 0.00442259 |
| 0.129194  | 1        | 1159 | 28 | 0.00431666 |

|           |          |      |    |            |
|-----------|----------|------|----|------------|
| 0.0835294 | 1        | 710  | 18 | 0.00930421 |
| 0.0841176 | 1        | 715  | 20 | 0.00564962 |
| 0.0691765 | 1        | 588  | 15 | 0.00755636 |
| 0.0762353 | 1        | 648  | 18 | 0.00835967 |
| 0.0851765 | 1        | 724  | 20 | 0.00792712 |
| 0.0693954 | 1        | 590  | 17 | 0.00981621 |
| 0.0718824 | 1        | 611  | 14 | 0.00921594 |
| 0.0647943 | 1        | 556  | 11 | 0.00973676 |
| 0.0731765 | 1        | 622  | 12 | 0.00643527 |
| 0.0720891 | 1        | 647  | 17 | 0.00882753 |
| 0.0736471 | 1        | 626  | 18 | 0.00609099 |
| 0.055894  | 1        | 789  | 23 | 0.00682368 |
| 0.0433551 | 1        | 612  | 16 | 0.00790946 |
| 0.0657232 | 1        | 613  | 16 | 0.00939249 |
| 0.0659376 | 1        | 615  | 16 | 0.00752988 |
| 0.0784706 | 1        | 667  | 18 | 0.00921594 |
| 0.0760461 | 1        | 647  | 16 | 0.00636465 |
| 0.0832941 | 1        | 708  | 20 | 0.00778588 |
| 0.0750588 | 1        | 638  | 13 | 0.00964849 |
| 0.0707059 | 1        | 601  | 17 | 0.00943663 |
| 0.0747059 | 1        | 635  | 17 | 0.00973676 |
| 0.100422  | 1        | 856  | 20 | 0.00631168 |
| 0.0711096 | 1        | 621  | 17 | 0.00878339 |
| 0.069917  | 1        | 598  | 17 | 0.00986918 |
| 0.0404359 | 1        | 731  | 16 | 0.00858918 |
| 0.188768  | 1        | 1610 | 45 | 0.00600272 |
| 0.0692691 | 1        | 598  | 17 | 0.00844794 |
| 0.0681053 | 1        | 587  | 17 | 0.00764464 |
| 0.0791765 | 1        | 673  | 17 | 0.0087216  |
| 0.0414118 | 1        | 352  | 10 | 0.00647058 |
| 0.0379082 | 1        | 606  | 16 | 0.00713264 |
| 0.0780431 | 1        | 670  | 19 | 0.0068943  |
| 0.152706  | 1        | 1298 | 36 | 0.00637347 |
| 0.0667734 | 1        | 584  | 14 | 0.00865981 |
| 0.069508  | 1        | 592  | 17 | 0.00971028 |
| 0.0718824 | 1        | 611  | 18 | 0.00491693 |
| 0.0718653 | 0.622378 | 1001 | 23 | 0.00489928 |
| 0.117765  | 1        | 1001 | 23 | 0.00489928 |
| 0.0741939 | 1        | 642  | 18 | 0.00828022 |
| 0.125777  | 1        | 1073 | 29 | 0.00527003 |
| 0.0646649 | 1        | 687  | 19 | 0.00637347 |
| 0.0807475 | 1        | 687  | 19 | 0.00637347 |
| 0.0907383 | 1        | 773  | 22 | 0.0054819  |
| 0.0909412 | 1        | 773  | 22 | 0.0054819  |
| 0.0355827 | 1        | 618  | 12 | 0.0096838  |
| 0.0944706 | 1        | 803  | 22 | 0.00983387 |
| 0.0744181 | 1        | 633  | 18 | 0.00630285 |

|           |         |      |    |            |
|-----------|---------|------|----|------------|
| 0.0733419 | 1       | 627  | 14 | 0.00519059 |
| 0.070159  | 1       | 600  | 16 | 0.0073445  |
| 0.0756243 | 1       | 645  | 17 | 0.00647058 |
| 0.0877069 | 1       | 747  | 22 | 0.00467859 |
| 0.0966303 | 1       | 823  | 22 | 0.00723857 |
| 0.0529088 | 1       | 452  | 13 | 0.00999276 |
| 0.0705579 | 1       | 602  | 17 | 0.00848325 |
| 0.0761273 | 1       | 677  | 19 | 0.00698257 |
| 0.0649845 | 1       | 837  | 23 | 0.00527003 |
| 0.0844956 | 1       | 727  | 19 | 0.00595858 |
| 0.0683121 | 1       | 584  | 14 | 0.00595858 |
| 0.106693  | 1       | 907  | 25 | 0.00598506 |
| 0.0685579 | 1       | 609  | 16 | 0.00797126 |
| 0.0808285 | 1       | 718  | 18 | 0.00754754 |
| 0.0596312 | 1       | 595  | 17 | 0.00834201 |
| 0.082684  | 1       | 711  | 20 | 0.00515528 |
| 0.0681742 | 1       | 609  | 16 | 0.00973676 |
| 0.037522  | 1       | 639  | 17 | 0.00675306 |
| 0.0742984 | 1       | 638  | 18 | 0.00504935 |
| 0.0745743 | 1       | 635  | 15 | 0.00610865 |
| 0.040742  | 1       | 347  | 10 | 0.00543776 |
| 0.0728235 | 1       | 619  | 18 | 0.00723857 |
| 0.134437  | 1       | 1161 | 31 | 0.0049081  |
| 0.0723769 | 1       | 616  | 16 | 0.00895111 |
| 0.0563335 | 1       | 708  | 19 | 0.00626754 |
| 0.0611076 | 1       | 768  | 19 | 0.00541128 |
| 0.0799346 | 1       | 733  | 20 | 0.00413128 |
| 0.0752414 | 1       | 678  | 19 | 0.00600272 |
| 0.0426738 | 1       | 625  | 17 | 0.00491693 |
| 0.0578711 | 1       | 697  | 20 | 0.00661182 |
| 0.0521507 | 1       | 468  | 13 | 0.00864215 |
| 0.0548074 | 1       | 468  | 13 | 0.00864215 |
| 0.034118  | 1       | 758  | 21 | 0.00616161 |
| 0.0275465 | 1       | 612  | 17 | 0.0072474  |
| 0.0433612 | 1       | 612  | 17 | 0.0072474  |
| 0.056     | 0.73913 | 644  | 13 | 0.00827139 |
| 0.0695294 | 1       | 591  | 17 | 0.00969263 |
| 0.0692606 | 1       | 607  | 17 | 0.00961318 |
| 0.0843529 | 1       | 717  | 15 | 0.00938366 |
| 0.0830491 | 1       | 706  | 20 | 0.00504052 |
| 0.0745905 | 1       | 642  | 17 | 0.00411363 |
| 0.0814676 | 1       | 695  | 17 | 0.00629403 |
| 0.0806545 | 1       | 695  | 17 | 0.00629403 |
| 0.0688142 | 1       | 596  | 17 | 0.00909235 |
| 0.0747027 | 1       | 647  | 18 | 0.00584382 |
| 0.0725882 | 1       | 617  | 18 | 0.00825374 |
| 0.117423  | 1       | 1017 | 27 | 0.00470507 |

|           |   |      |    |            |
|-----------|---|------|----|------------|
| 0.0887059 | 1 | 754  | 21 | 0.00810367 |
| 0.071069  | 1 | 607  | 17 | 0.00759167 |
| 0.0264506 | 1 | 599  | 17 | 0.00940132 |
| 0.0478844 | 1 | 610  | 15 | 0.00805953 |
| 0.0362163 | 1 | 675  | 15 | 0.00841263 |
| 0.0766706 | 1 | 654  | 16 | 0.00986035 |
| 0.131412  | 1 | 1117 | 29 | 0.00571141 |
| 0.122332  | 1 | 1089 | 30 | 0.00584382 |
| 0.0510862 | 1 | 602  | 18 | 0.00825374 |
| 0.0699038 | 1 | 596  | 11 | 0.00971028 |
| 0.0725882 | 1 | 617  | 14 | 0.00630285 |
| 0.0507367 | 1 | 699  | 19 | 0.00603803 |
| 0.0603179 | 1 | 831  | 20 | 0.00501404 |
| 0.0702809 | 1 | 608  | 17 | 0.00922477 |
| 0.0449787 | 1 | 709  | 20 | 0.00552603 |
| 0.0229019 | 1 | 626  | 18 | 0.00847443 |
| 0.0197922 | 1 | 541  | 15 | 0.00943663 |
| 0.0283946 | 1 | 601  | 17 | 0.00771526 |
| 0.0219873 | 1 | 601  | 17 | 0.00771526 |
| 0.0297175 | 1 | 629  | 17 | 0.00576437 |
| 0.0491826 | 1 | 1041 | 29 | 0.00629403 |
| 0.0284891 | 1 | 603  | 16 | 0.00828022 |
| 0.0435434 | 1 | 668  | 19 | 0.00695609 |
| 0.0333191 | 1 | 626  | 18 | 0.00944545 |
| 0.0324675 | 1 | 610  | 17 | 0.00822726 |
| 0.0869412 | 1 | 739  | 20 | 0.00609099 |
| 0.0868492 | 1 | 739  | 20 | 0.00609099 |
| 0.0780993 | 1 | 664  | 14 | 0.00912766 |
| 0.0709178 | 1 | 605  | 14 | 0.00617927 |
| 0.0742    | 1 | 633  | 17 | 0.00959552 |
| 0.071169  | 1 | 607  | 17 | 0.00816546 |
| 0.0643629 | 1 | 894  | 25 | 0.00656768 |
| 0.0685305 | 1 | 603  | 17 | 0.00996628 |
| 0.0976471 | 1 | 830  | 23 | 0.00552603 |
| 0.0692407 | 1 | 590  | 17 | 0.0076005  |
| 0.0697271 | 1 | 603  | 17 | 0.00976324 |
| 0.134195  | 1 | 1142 | 32 | 0.00930421 |
| 0.120727  | 1 | 1056 | 30 | 0.00858918 |
| 0.0735294 | 1 | 625  | 17 | 0.00870394 |
| 0.0707059 | 1 | 601  | 15 | 0.00722974 |
| 0.0838824 | 1 | 713  | 19 | 0.00498755 |
| 0.0797004 | 1 | 713  | 19 | 0.00498755 |
| 0.125662  | 1 | 1092 | 28 | 0.0048728  |
| 0.0714118 | 1 | 607  | 10 | 0.00835967 |
| 0.0712525 | 1 | 607  | 10 | 0.00835967 |
| 0.0791033 | 1 | 801  | 21 | 0.0068943  |
| 0.0956471 | 1 | 813  | 22 | 0.00571141 |

|           |          |      |    |            |
|-----------|----------|------|----|------------|
| 0.118307  | 1        | 1012 | 25 | 0.00405183 |
| 0.0230218 | 1        | 604  | 17 | 0.00955139 |
| 0.070892  | 1        | 604  | 17 | 0.00955139 |
| 0.0716471 | 1        | 609  | 18 | 0.00762698 |
| 0.109412  | 1        | 930  | 25 | 0.0054201  |
| 0.0731251 | 1        | 625  | 17 | 0.0051641  |
| 0.0791765 | 1        | 673  | 19 | 0.00738864 |
| 0.0711765 | 1        | 605  | 14 | 0.00982504 |
| 0.0163491 | 0.204412 | 680  | 14 | 0.00557017 |
| 0.0681398 | 1        | 700  | 20 | 0.005579   |
| 0.040428  | 1        | 597  | 12 | 0.00896877 |
| 0.0566253 | 1        | 597  | 12 | 0.00896877 |
| 0.0623011 | 1        | 920  | 18 | 0.00564962 |
| 0.0872617 | 1        | 920  | 18 | 0.00564962 |
| 0.039954  | 1        | 590  | 17 | 0.00920711 |
| 0.0559613 | 1        | 590  | 17 | 0.00920711 |
| 0.0798824 | 1        | 679  | 16 | 0.0065412  |
| 0.0938824 | 1        | 798  | 16 | 0.0092689  |
| 0.0818824 | 1        | 696  | 19 | 0.0065412  |
| 0.109176  | 1        | 928  | 26 | 0.0047139  |
| 0.143724  | 1        | 1232 | 31 | 0.00630285 |
| 0.166471  | 1        | 1415 | 37 | 0.00639996 |
| 0.082431  | 1        | 708  | 20 | 0.00651472 |
| 0.0727675 | 1        | 625  | 18 | 0.00973676 |
| 0.0704391 | 1        | 600  | 16 | 0.00648823 |
| 0.0412145 | 1        | 600  | 17 | 0.00923359 |
| 0.0698275 | 1        | 595  | 16 | 0.00991331 |
| 0.0927835 | 1        | 846  | 24 | 0.00467859 |
| 0.0725882 | 1        | 617  | 17 | 0.00764464 |
| 0.0736471 | 1        | 626  | 18 | 0.00882753 |
| 0.100337  | 1        | 864  | 24 | 0.00578203 |
| 0.0742353 | 1        | 631  | 18 | 0.00615279 |
| 0.102941  | 1        | 875  | 22 | 0.00631168 |
| 0.0525983 | 1        | 833  | 23 | 0.00414011 |
| 0.0717647 | 1        | 610  | 16 | 0.00655003 |
| 0.0717647 | 1        | 610  | 16 | 0.00655003 |
| 0.0874118 | 1        | 743  | 20 | 0.00848325 |
| 0.0722183 | 1        | 614  | 18 | 0.00973676 |
| 0.0478755 | 1        | 409  | 12 | 0.00956021 |
| 0.0517913 | 1        | 665  | 19 | 0.00771526 |
| 0.0782353 | 1        | 665  | 19 | 0.00771526 |
| 0.0695294 | 1        | 591  | 15 | 0.00684133 |
| 0.0715294 | 1        | 608  | 15 | 0.00739747 |
| 0.0750588 | 1        | 638  | 18 | 0.00640879 |
| 0.0686987 | 1        | 586  | 15 | 0.00837732 |
| 0.0702353 | 1        | 597  | 17 | 0.00940132 |
| 0.0757309 | 1        | 645  | 18 | 0.00545541 |



|           |   |      |    |            |
|-----------|---|------|----|------------|
| 0.0714998 | 1 | 645  | 18 | 0.00545541 |
| 0.0937647 | 1 | 797  | 16 | 0.00411363 |
| 0.0764706 | 1 | 650  | 19 | 0.00601155 |
| 0.0735294 | 1 | 625  | 17 | 0.00882753 |
| 0.0684706 | 1 | 582  | 16 | 0.00858918 |
| 0.0724859 | 1 | 617  | 13 | 0.00904822 |
| 0.0427136 | 1 | 799  | 22 | 0.00714147 |
| 0.0342527 | 1 | 575  | 14 | 0.00922477 |
| 0.0676391 | 1 | 575  | 14 | 0.00922477 |
| 0.100822  | 1 | 859  | 19 | 0.00442259 |
| 0.0455294 | 1 | 387  | 11 | 0.00949842 |
| 0.0228467 | 1 | 387  | 11 | 0.00949842 |
| 0.0930588 | 1 | 791  | 22 | 0.00553486 |
| 0.0717647 | 1 | 610  | 17 | 0.00777705 |
| 0.0935074 | 1 | 795  | 18 | 0.00602037 |
| 0.0935294 | 1 | 795  | 18 | 0.00602037 |
| 0.104235  | 1 | 886  | 24 | 0.00603803 |
| 0.0473493 | 1 | 702  | 20 | 0.00752105 |
| 0.0970588 | 1 | 825  | 23 | 0.00492576 |
| 0.126118  | 1 | 1072 | 28 | 0.00402535 |
| 0.0606456 | 1 | 697  | 19 | 0.00893346 |
| 0.0528148 | 1 | 607  | 17 | 0.00905704 |
| 0.116326  | 1 | 989  | 21 | 0.00923359 |
| 0.0706917 | 1 | 603  | 17 | 0.00758285 |
| 0.0671765 | 1 | 571  | 12 | 0.00912766 |
| 0.0704706 | 1 | 599  | 16 | 0.00511114 |
| 0.0725882 | 1 | 617  | 18 | 0.0083067  |
| 0.0607059 | 1 | 516  | 15 | 0.0087216  |
| 0.0693302 | 1 | 590  | 17 | 0.00995745 |
| 0.0692814 | 1 | 590  | 17 | 0.00995745 |
| 0.0783769 | 1 | 705  | 19 | 0.00895111 |
| 0.0801177 | 1 | 681  | 20 | 0.00858918 |
| 0.0419337 | 1 | 602  | 17 | 0.00966614 |
| 0.0498023 | 1 | 592  | 16 | 0.00782119 |
| 0.0703529 | 1 | 598  | 17 | 0.00693844 |
| 0.160824  | 1 | 1367 | 37 | 0.00489045 |
| 0.0686845 | 1 | 590  | 17 | 0.00716795 |
| 0.0844642 | 1 | 722  | 20 | 0.00980738 |
| 0.0422187 | 1 | 564  | 12 | 0.00976324 |
| 0.0728235 | 1 | 619  | 17 | 0.00879222 |
| 0.0796533 | 1 | 680  | 19 | 0.00882753 |
| 0.0754996 | 1 | 714  | 20 | 0.00535831 |
| 0.0812941 | 1 | 691  | 16 | 0.00712381 |
| 0.0452566 | 1 | 717  | 20 | 0.00882753 |
| 0.0451028 | 1 | 717  | 20 | 0.00882753 |
| 0.111677  | 1 | 964  | 24 | 0.00467859 |
| 0.0503612 | 1 | 495  | 12 | 0.00748574 |

|           |   |     |    |            |
|-----------|---|-----|----|------------|
| 0.0263123 | 1 | 399 | 10 | 0.00923359 |
| 0.0539436 | 1 | 818 | 23 | 0.0093307  |
| 0.0962353 | 1 | 818 | 23 | 0.0093307  |
| 0.0418723 | 1 | 594 | 16 | 0.00879222 |
| 0.0409994 | 1 | 594 | 16 | 0.00879222 |
| 0.0616805 | 1 | 875 | 25 | 0.00560548 |
| 0.0603948 | 1 | 875 | 25 | 0.00560548 |
| 0.0382989 | 1 | 616 | 15 | 0.00744161 |
| 0.0698824 | 1 | 594 | 15 | 0.00956021 |
| 0.0615701 | 1 | 658 | 18 | 0.0065412  |
| 0.0771848 | 1 | 658 | 18 | 0.0065412  |
| 0.0887059 | 1 | 948 | 20 | 0.00529652 |
| 0.0717647 | 1 | 610 | 16 | 0.00901291 |
| 0.0791643 | 1 | 682 | 19 | 0.00967497 |
| 0.0360619 | 1 | 615 | 17 | 0.00893346 |
| 0.0431367 | 1 | 593 | 17 | 0.00595858 |
| 0.0404706 | 1 | 344 | 10 | 0.0088187  |
| 0.0948235 | 1 | 806 | 23 | 0.00416659 |
| 0.0945344 | 1 | 806 | 23 | 0.00416659 |
| 0.0485414 | 1 | 614 | 17 | 0.00911001 |
| 0.058906  | 1 | 588 | 16 | 0.00986035 |
| 0.0685794 | 1 | 588 | 16 | 0.00986035 |
| 0.0818844 | 1 | 697 | 19 | 0.00466094 |
| 0.10561   | 1 | 898 | 23 | 0.00492576 |
| 0.0691765 | 1 | 588 | 12 | 0.00926008 |
| 0.103219  | 1 | 901 | 22 | 0.00970145 |
| 0.106     | 1 | 901 | 22 | 0.00970145 |
| 0.071521  | 1 | 608 | 14 | 0.00979856 |
| 0.0704706 | 1 | 599 | 16 | 0.00779471 |
| 0.0809412 | 1 | 688 | 19 | 0.005067   |
| 0.0381076 | 1 | 646 | 18 | 0.00852739 |
| 0.117529  | 1 | 999 | 28 | 0.00519941 |
| 0.0790398 | 1 | 675 | 19 | 0.0070532  |
| 0.0736117 | 1 | 684 | 19 | 0.00900408 |
| 0.0767878 | 1 | 655 | 15 | 0.00840381 |
| 0.0400655 | 1 | 661 | 15 | 0.00867746 |
| 0.0679418 | 1 | 579 | 15 | 0.00858918 |
| 0.0597694 | 1 | 617 | 15 | 0.00874808 |
| 0.0606413 | 1 | 626 | 18 | 0.00932187 |
| 0.0788235 | 1 | 670 | 19 | 0.00841263 |
| 0.0780249 | 1 | 670 | 19 | 0.00841263 |
| 0.0829914 | 1 | 708 | 20 | 0.004555   |
| 0.0785206 | 1 | 673 | 19 | 0.00632051 |
| 0.0914118 | 1 | 777 | 21 | 0.0082096  |
| 0.113137  | 1 | 968 | 27 | 0.00406066 |
| 0.0705813 | 1 | 601 | 15 | 0.00938366 |
| 0.0695294 | 1 | 591 | 13 | 0.00579969 |

|           |          |      |    |            |
|-----------|----------|------|----|------------|
| 0.0870588 | 1        | 740  | 21 | 0.00579969 |
| 0.0609046 | 1        | 847  | 24 | 0.00613513 |
| 0.0489143 | 1        | 847  | 24 | 0.00613513 |
| 0.0696471 | 1        | 592  | 17 | 0.00813898 |
| 0.119484  | 1        | 1018 | 28 | 0.00533183 |
| 0.0689138 | 1        | 597  | 17 | 0.00982504 |
| 0.070227  | 1        | 597  | 17 | 0.00923359 |
| 0.0798824 | 1        | 679  | 18 | 0.0064794  |
| 0.0533451 | 1        | 606  | 17 | 0.00970145 |
| 0.0712941 | 1        | 606  | 17 | 0.00970145 |
| 0.0701176 | 1        | 596  | 16 | 0.00902173 |
| 0.117018  | 1        | 995  | 27 | 0.00498755 |
| 0.0801177 | 1        | 681  | 18 | 0.00967497 |
| 0.0547059 | 1        | 465  | 13 | 0.00915415 |
| 0.082667  | 1        | 703  | 20 | 0.00584382 |
| 0.0780068 | 1        | 670  | 18 | 0.00849208 |
| 0.0695162 | 1        | 592  | 17 | 0.0095867  |
| 0.0728235 | 1        | 619  | 16 | 0.00729154 |
| 0.137248  | 1        | 1185 | 29 | 0.00600272 |
| 0.0383512 | 1        | 588  | 13 | 0.00812133 |
| 0.0707059 | 1        | 601  | 18 | 0.00887167 |
| 0.0534125 | 1        | 864  | 21 | 0.00855387 |
| 0.0694118 | 1        | 590  | 16 | 0.00505817 |
| 0.0597712 | 1        | 768  | 20 | 0.00828022 |
| 0.0932941 | 1        | 793  | 22 | 0.00584382 |
| 0.0476302 | 1        | 612  | 17 | 0.00885401 |
| 0.0699613 | 1        | 596  | 17 | 0.00511997 |
| 0.0711765 | 1        | 605  | 17 | 0.00949842 |
| 0.0670588 | 1        | 570  | 12 | 0.00779471 |
| 0.0874036 | 1        | 748  | 21 | 0.00469624 |
| 0.0725995 | 1        | 620  | 18 | 0.00956021 |
| 0.0558144 | 1        | 599  | 16 | 0.00729154 |
| 0.0725882 | 1        | 617  | 18 | 0.00923359 |
| 0.0668334 | 1        | 588  | 17 | 0.00909235 |
| 0.0878824 | 1        | 747  | 21 | 0.00611748 |
| 0.0712358 | 1        | 607  | 17 | 0.00707968 |
| 0.0684706 | 1        | 582  | 17 | 0.0079536  |
| 0.0882899 | 1        | 1189 | 31 | 0.0041048  |
| 0.113247  | 1        | 966  | 27 | 0.0039459  |
| 0.113474  | 1        | 966  | 27 | 0.0039459  |
| 0.0716295 | 1        | 611  | 12 | 0.00470507 |
| 0.0447551 | 0.623568 | 611  | 12 | 0.00470507 |
| 0.0691765 | 1        | 588  | 17 | 0.00865098 |
| 0.0737647 | 1        | 627  | 18 | 0.00640879 |
| 0.0707059 | 1        | 601  | 16 | 0.00948959 |
| 0.157591  | 1        | 1340 | 32 | 0.00478452 |
| 0.0694118 | 1        | 590  | 17 | 0.00641761 |

|           |          |      |    |            |
|-----------|----------|------|----|------------|
| 0.0737213 | 1        | 627  | 18 | 0.00973676 |
| 0.0489586 | 1        | 637  | 18 | 0.00979856 |
| 0.0745204 | 1        | 637  | 18 | 0.00979856 |
| 0.0769142 | 1        | 668  | 18 | 0.00504052 |
| 0.0544706 | 0.60841  | 761  | 22 | 0.00931304 |
| 0.0733505 | 1        | 627  | 17 | 0.00758285 |
| 0.0684371 | 1        | 585  | 11 | 0.00835967 |
| 0.0691765 | 1        | 588  | 13 | 0.00712381 |
| 0.0748235 | 1        | 636  | 13 | 0.00959552 |
| 0.0474308 | 1        | 636  | 13 | 0.00959552 |
| 0.0473549 | 1        | 444  | 13 | 0.00900408 |
| 0.0698824 | 1        | 594  | 17 | 0.00700906 |
| 0.0948132 | 1        | 850  | 24 | 0.00427252 |
| 0.0572236 | 1        | 587  | 17 | 0.00789181 |
| 0.0708235 | 1        | 602  | 17 | 0.00933952 |
| 0.109762  | 1        | 940  | 26 | 0.00723857 |
| 0.0698629 | 1        | 596  | 17 | 0.00656768 |
| 0.0437952 | 1        | 703  | 19 | 0.00541128 |
| 0.0794352 | 1        | 737  | 21 | 0.00971028 |
| 0.0705085 | 1        | 624  | 18 | 0.0048728  |
| 0.0877966 | 1        | 777  | 22 | 0.00808601 |
| 0.0714118 | 1        | 607  | 17 | 0.00888049 |
| 0.0990588 | 1        | 842  | 23 | 0.00501404 |
| 0.0417368 | 1        | 595  | 16 | 0.00639996 |
| 0.151562  | 1        | 1358 | 29 | 0.005323   |
| 0.0992941 | 1        | 844  | 24 | 0.00675306 |
| 0.0940908 | 1        | 906  | 23 | 0.00512879 |
| 0.0624706 | 0.672152 | 790  | 21 | 0.00529652 |
| 0.0661176 | 1        | 562  | 10 | 0.00805953 |
| 0.0805693 | 1        | 685  | 18 | 0.00637347 |
| 0.0732709 | 1        | 642  | 18 | 0.00634699 |
| 0.0673066 | 1        | 589  | 16 | 0.00723857 |
| 0.0731487 | 1        | 729  | 21 | 0.00636465 |
| 0.121808  | 1        | 1040 | 18 | 0.00956021 |
| 0.0708235 | 1        | 602  | 17 | 0.00829788 |
| 0.0699512 | 1        | 602  | 17 | 0.00829788 |
| 0.0501127 | 1        | 645  | 14 | 0.00783002 |
| 0.0629371 | 0.987013 | 693  | 19 | 0.00979856 |
| 0.119765  | 1        | 1018 | 29 | 0.005067   |
| 0.069099  | 1        | 589  | 15 | 0.00899525 |
| 0.0687261 | 1        | 594  | 16 | 0.00617044 |
| 0.100824  | 1        | 857  | 24 | 0.0089776  |
| 0.0703878 | 1        | 599  | 17 | 0.00745926 |
| 0.071857  | 1        | 611  | 17 | 0.00833319 |
| 0.0322353 | 0.448445 | 611  | 17 | 0.00833319 |
| 0.0787059 | 1        | 669  | 19 | 0.00890698 |
| 0.104471  | 1        | 888  | 25 | 0.00970145 |

|           |          |      |    |            |
|-----------|----------|------|----|------------|
| 0.0824706 | 1        | 701  | 20 | 0.00742395 |
| 0.0714118 | 1        | 607  | 17 | 0.0095249  |
| 0.0688235 | 1        | 585  | 16 | 0.00920711 |
| 0.0389069 | 1        | 588  | 14 | 0.00920711 |
| 0.121647  | 1        | 1034 | 30 | 0.00504052 |
| 0.0398824 | 1        | 339  | 10 | 0.00895111 |
| 0.0703529 | 1        | 598  | 17 | 0.00756519 |
| 0.102941  | 1        | 875  | 24 | 0.00572024 |
| 0.0711765 | 1        | 605  | 17 | 0.00815664 |
| 0.0841176 | 1        | 715  | 15 | 0.00611748 |
| 0.069373  | 1        | 593  | 13 | 0.00819195 |
| 0.0696009 | 1        | 593  | 13 | 0.00819195 |
| 0.0804706 | 1        | 684  | 19 | 0.00681485 |
| 0.0691765 | 1        | 588  | 12 | 0.0082096  |
| 0.0718824 | 1        | 611  | 17 | 0.00925125 |
| 0.0704706 | 1        | 599  | 16 | 0.00621458 |
| 0.074705  | 1        | 728  | 20 | 0.00636465 |
| 0.0633145 | 1        | 617  | 18 | 0.00986918 |
| 0.0838356 | 1        | 918  | 25 | 0.00450204 |
| 0.108     | 1        | 918  | 25 | 0.00450204 |
| 0.0355278 | 1        | 592  | 17 | 0.00979856 |
| 0.04549   | 1        | 758  | 21 | 0.00563196 |
| 0.036188  | 1        | 603  | 17 | 0.00973676 |
| 0.0330002 | 1        | 677  | 19 | 0.00515528 |
| 0.0692941 | 1        | 589  | 17 | 0.0069914  |
| 0.0884602 | 0.990777 | 759  | 20 | 0.0064794  |
| 0.132     | 1        | 1122 | 31 | 0.00536714 |
| 0.0729412 | 1        | 620  | 14 | 0.0090747  |
| 0.0425457 | 1        | 601  | 17 | 0.00933952 |
| 0.0723529 | 1        | 615  | 18 | 0.00860684 |
| 0.0732941 | 1        | 623  | 18 | 0.00970145 |
| 0.134235  | 1        | 1141 | 25 | 0.00657651 |
| 0.0701858 | 1        | 597  | 17 | 0.00971028 |
| 0.0536027 | 1        | 459  | 13 | 0.00877456 |
| 0.0379988 | 1        | 619  | 15 | 0.0061881  |
| 0.0705882 | 1        | 600  | 17 | 0.00915415 |
| 0.103032  | 1        | 880  | 21 | 0.0052259  |
| 0.0885808 | 1        | 754  | 21 | 0.00834201 |
| 0.0400794 | 1        | 545  | 15 | 0.0064794  |
| 0.0980736 | 1        | 840  | 18 | 0.00904822 |
| 0.0712864 | 1        | 609  | 17 | 0.00918946 |
| 0.0766445 | 1        | 656  | 19 | 0.00693844 |
| 0.0716205 | 1        | 613  | 14 | 0.00749457 |
| 0.0727059 | 1        | 618  | 17 | 0.00925125 |
| 0.0723529 | 1        | 615  | 16 | 0.00685899 |
| 0.0543467 | 1        | 542  | 19 | 0.00973676 |
| 0.0865882 | 1        | 736  | 21 | 0.00629403 |

|           |          |      |    |            |
|-----------|----------|------|----|------------|
| 0.0725882 | 1        | 617  | 41 | 0.00994862 |
| 0.0718824 | 1        | 611  | 17 | 0.00717678 |
| 0.084303  | 1        | 768  | 21 | 0.00820077 |
| 0.0722353 | 1        | 614  | 17 | 0.00882753 |
| 0.0593115 | 1        | 622  | 16 | 0.00585265 |
| 0.0715294 | 1        | 608  | 14 | 0.00927773 |
| 0.0709412 | 1        | 603  | 17 | 0.0072474  |
| 0.0729412 | 1        | 620  | 17 | 0.00538479 |
| 0.0988031 | 1        | 842  | 23 | 0.00645292 |
| 0.118355  | 1        | 1013 | 28 | 0.00538479 |
| 0.119176  | 1        | 1013 | 28 | 0.00538479 |
| 0.0738176 | 1        | 629  | 17 | 0.00655003 |
| 0.0259176 | 1        | 877  | 25 | 0.00639996 |
| 0.018293  | 1        | 619  | 18 | 0.00930421 |
| 0.027277  | 1        | 923  | 26 | 0.00609982 |
| 0.026154  | 1        | 885  | 25 | 0.0043608  |
| 0.0832124 | 1        | 860  | 24 | 0.00538479 |
| 0.0719206 | 1        | 616  | 17 | 0.00809484 |
| 0.0720374 | 1        | 617  | 17 | 0.00671775 |
| 0.0777647 | 1        | 661  | 18 | 0.0083685  |
| 0.0510588 | 0.726968 | 597  | 16 | 0.00779471 |
| 0.0753545 | 1        | 643  | 18 | 0.00885401 |
| 0.0709412 | 1        | 603  | 17 | 0.00825374 |
| 0.0744908 | 1        | 801  | 20 | 0.00497873 |
| 0.071328  | 1        | 608  | 17 | 0.00976324 |
| 0.0836471 | 1        | 711  | 18 | 0.00495224 |
| 0.0844906 | 1        | 724  | 19 | 0.00521707 |
| 0.096     | 1        | 816  | 23 | 0.0087216  |
| 0.0808235 | 1        | 687  | 17 | 0.0095867  |
| 0.0729412 | 1        | 620  | 18 | 0.00953373 |
| 0.0718824 | 1        | 611  | 17 | 0.00783002 |
| 0.0708069 | 1        | 602  | 17 | 0.00923359 |
| 0.0701141 | 1        | 602  | 17 | 0.00923359 |
| 0.0618742 | 1        | 896  | 26 | 0.00659416 |
| 0.0784706 | 1        | 667  | 19 | 0.00579969 |
| 0.0745882 | 1        | 634  | 17 | 0.00560548 |
| 0.0851839 | 1        | 725  | 19 | 0.00636465 |
| 0.0937282 | 1        | 807  | 22 | 0.00460797 |
| 0.0705882 | 1        | 600  | 17 | 0.00847443 |
| 0.0728235 | 1        | 619  | 14 | 0.00519941 |
| 0.0690588 | 1        | 587  | 16 | 0.00692078 |
| 0.0510228 | 1        | 434  | 10 | 0.00996628 |
| 0.0510588 | 1        | 434  | 10 | 0.00996628 |
| 0.0789412 | 1        | 671  | 19 | 0.00989566 |
| 0.0711765 | 1        | 605  | 17 | 0.00993097 |
| 0.0984086 | 1        | 841  | 23 | 0.00507583 |
| 0.0701176 | 1        | 596  | 17 | 0.00712381 |

|           |          |      |    |            |
|-----------|----------|------|----|------------|
| 0.0790588 | 1        | 672  | 19 | 0.00710616 |
| 0.0579423 | 1        | 615  | 15 | 0.00693844 |
| 0.0599452 | 1        | 525  | 15 | 0.00923359 |
| 0.0616197 | 1        | 525  | 15 | 0.00923359 |
| 0.070196  | 1        | 598  | 17 | 0.0099398  |
| 0.123137  | 1        | 1049 | 26 | 0.00953373 |
| 0.0681791 | 1        | 580  | 15 | 0.00857153 |
| 0.13669   | 1        | 1162 | 31 | 0.00504052 |
| 0.0884706 | 1        | 752  | 19 | 0.00930421 |
| 0.0692932 | 1        | 598  | 17 | 0.00981621 |
| 0.0652375 | 1        | 563  | 12 | 0.00986918 |
| 0.0750642 | 1        | 643  | 16 | 0.00825374 |
| 0.08629   | 1        | 788  | 22 | 0.0039459  |
| 0.124471  | 1        | 1058 | 27 | 0.00404301 |
| 0.0824706 | 1        | 701  | 20 | 0.00594093 |
| 0.0879561 | 1        | 769  | 22 | 0.00639996 |
| 0.0629803 | 1        | 672  | 19 | 0.00594093 |
| 0.0739232 | 1        | 635  | 17 | 0.00951608 |
| 0.0214046 | 1        | 516  | 15 | 0.00888932 |
| 0.0709055 | 1        | 610  | 17 | 0.0079536  |
| 0.0637096 | 1        | 925  | 26 | 0.00511997 |
| 0.0546509 | 1        | 490  | 14 | 0.00462562 |
| 0.0559893 | 1        | 502  | 14 | 0.00828022 |
| 0.0692069 | 1        | 603  | 16 | 0.00957787 |
| 0.104     | 1        | 884  | 19 | 0.00595858 |
| 0.0414225 | 1        | 615  | 15 | 0.00970145 |
| 0.0668148 | 1        | 992  | 26 | 0.00900408 |
| 0.0834598 | 1        | 715  | 21 | 0.00835967 |
| 0.0802774 | 1        | 683  | 19 | 0.00964849 |
| 0.0443311 | 1        | 739  | 21 | 0.00586148 |
| 0.0940955 | 1        | 800  | 21 | 0.00956021 |
| 0.0784706 | 1        | 667  | 19 | 0.00397239 |
| 0.0856471 | 1        | 728  | 20 | 0.0082096  |
| 0.131022  | 1        | 1115 | 31 | 0.00558783 |
| 0.038652  | 1        | 601  | 15 | 0.00981621 |
| 0.0711597 | 1        | 605  | 13 | 0.0092689  |
| 0.0762353 | 1        | 648  | 15 | 0.00520824 |
| 0.0872765 | 1        | 747  | 18 | 0.00657651 |
| 0.0715294 | 1        | 608  | 17 | 0.00779471 |
| 0.112235  | 1        | 954  | 27 | 0.0052259  |
| 0.0477927 | 1        | 747  | 21 | 0.00527003 |
| 0.0441176 | 0.618812 | 606  | 17 | 0.00845677 |
| 0.0363177 | 1        | 589  | 14 | 0.00805953 |
| 0.0718824 | 1        | 611  | 17 | 0.00892463 |
| 0.0671765 | 1        | 571  | 16 | 0.00775057 |
| 0.0807505 | 1        | 964  | 24 | 0.00648823 |
| 0.116353  | 1        | 989  | 27 | 0.00538479 |

|           |   |      |    |            |
|-----------|---|------|----|------------|
| 0.0537716 | 1 | 494  | 14 | 0.00986035 |
| 0.0723529 | 1 | 615  | 13 | 0.00894229 |
| 0.0394755 | 1 | 587  | 24 | 0.00969263 |
| 0.067816  | 1 | 594  | 17 | 0.00893346 |
| 0.0542031 | 1 | 806  | 21 | 0.0049081  |
| 0.0747273 | 1 | 644  | 18 | 0.00616161 |
| 0.0602353 | 1 | 512  | 15 | 0.00904822 |
| 0.0756471 | 1 | 643  | 18 | 0.00804188 |
| 0.038075  | 1 | 591  | 13 | 0.00731802 |
| 0.0400077 | 1 | 621  | 18 | 0.00529652 |
| 0.0723018 | 1 | 621  | 18 | 0.00529652 |
| 0.0413607 | 1 | 642  | 13 | 0.00395473 |
| 0.0621875 | 1 | 597  | 16 | 0.00902173 |
| 0.0522501 | 1 | 447  | 13 | 0.00859801 |
| 0.0724706 | 1 | 616  | 17 | 0.00717678 |
| 0.0699682 | 1 | 616  | 17 | 0.00717678 |
| 0.0692976 | 1 | 590  | 16 | 0.0099398  |
| 0.0991765 | 1 | 843  | 22 | 0.00613513 |
| 0.0743529 | 1 | 632  | 12 | 0.00486397 |
| 0.0837709 | 1 | 718  | 20 | 0.00766229 |
| 0.0549441 | 1 | 609  | 10 | 0.009622   |
| 0.0686646 | 1 | 598  | 17 | 0.00820077 |
| 0.117915  | 1 | 1088 | 28 | 0.009622   |
| 0.12767   | 1 | 1088 | 28 | 0.009622   |
| 0.0749412 | 1 | 637  | 18 | 0.00783002 |
| 0.0746339 | 1 | 637  | 18 | 0.00783002 |
| 0.133435  | 1 | 1137 | 28 | 0.00875691 |
| 0.0885882 | 1 | 753  | 21 | 0.00613513 |
| 0.0838824 | 1 | 713  | 20 | 0.00617927 |
| 0.0696471 | 1 | 592  | 17 | 0.00840381 |
| 0.0938885 | 1 | 805  | 23 | 0.00617927 |
| 0.0940091 | 1 | 805  | 23 | 0.00617927 |
| 0.0535442 | 1 | 491  | 14 | 0.00970145 |
| 0.064     | 1 | 544  | 11 | 0.00957787 |
| 0.0932941 | 1 | 793  | 22 | 0.00633817 |
| 0.0741765 | 1 | 644  | 17 | 0.00469624 |
| 0.0692046 | 1 | 589  | 15 | 0.00751223 |
| 0.0689139 | 1 | 599  | 17 | 0.00943663 |
| 0.076905  | 1 | 654  | 18 | 0.00966614 |
| 0.0696343 | 1 | 596  | 14 | 0.00976324 |
| 0.0701176 | 1 | 596  | 17 | 0.00847443 |
| 0.0727108 | 1 | 644  | 18 | 0.00888049 |
| 0.115627  | 1 | 990  | 27 | 0.00621458 |
| 0.0703529 | 1 | 598  | 17 | 0.00913649 |
| 0.0708504 | 1 | 604  | 16 | 0.00913649 |
| 0.0716046 | 1 | 610  | 18 | 0.00920711 |
| 0.047998  | 1 | 754  | 21 | 0.00895111 |



|           |          |      |    |            |
|-----------|----------|------|----|------------|
| 0.0703529 | 1        | 598  | 16 | 0.00921594 |
| 0.0528631 | 1        | 649  | 17 | 0.00570258 |
| 0.0680696 | 1        | 579  | 16 | 0.0097809  |
| 0.0716684 | 1        | 918  | 23 | 0.00617044 |
| 0.0688731 | 1        | 591  | 17 | 0.00807719 |
| 0.0557494 | 1        | 799  | 23 | 0.00563196 |
| 0.0199257 | 0.423029 | 799  | 23 | 0.00563196 |
| 0.109818  | 1        | 934  | 27 | 0.00637347 |
| 0.0368443 | 1        | 609  | 16 | 0.00576437 |
| 0.0366628 | 1        | 606  | 17 | 0.00911884 |
| 0.0777373 | 1        | 661  | 18 | 0.00742395 |
| 0.0434225 | 1        | 610  | 17 | 0.00923359 |
| 0.0409311 | 1        | 575  | 15 | 0.00924242 |
| 0.0694673 | 1        | 592  | 16 | 0.00903056 |
| 0.0724774 | 1        | 617  | 17 | 0.00865981 |
| 0.0690296 | 1        | 594  | 17 | 0.00664713 |
| 0.0752589 | 1        | 654  | 19 | 0.00756519 |
| 0.0876471 | 1        | 745  | 21 | 0.00515528 |
| 0.0983735 | 1        | 877  | 24 | 0.00999276 |
| 0.0634003 | 1        | 1162 | 30 | 0.00504052 |
| 0.0717736 | 1        | 624  | 16 | 0.00561431 |
| 0.0824259 | 1        | 704  | 20 | 0.00971911 |
| 0.0749412 | 1        | 637  | 18 | 0.00956021 |
| 0.0744768 | 1        | 637  | 18 | 0.00956021 |
| 0.0768235 | 1        | 653  | 18 | 0.00738864 |
| 0.0763475 | 1        | 653  | 18 | 0.00738864 |
| 0.0691787 | 1        | 593  | 17 | 0.00793595 |
| 0.067029  | 1        | 592  | 16 | 0.00858918 |
| 0.0717309 | 1        | 610  | 17 | 0.0066383  |
| 0.0622391 | 1        | 656  | 14 | 0.00902173 |
| 0.0709253 | 1        | 604  | 17 | 0.00762698 |
| 0.0888915 | 1        | 757  | 22 | 0.00520824 |
| 0.0910588 | 1        | 774  | 22 | 0.0095867  |
| 0.136706  | 1        | 1162 | 49 | 0.00529652 |
| 0.122407  | 1        | 1776 | 49 | 0.00659416 |
| 0.0795294 | 1        | 676  | 18 | 0.0095867  |
| 0.0349946 | 1        | 620  | 17 | 0.00822726 |
| 0.0345431 | 1        | 612  | 17 | 0.00708851 |
| 0.0748036 | 1        | 638  | 18 | 0.00764464 |

| Fraction of negatively enriched windows in region | MAT-score on T(HETC vs. HETHF) |
|---------------------------------------------------|--------------------------------|
| 1                                                 | -3.57979                       |
| 1                                                 | -3.87235                       |
| 0                                                 | 3.97963                        |
| 1                                                 | -3.65112                       |
| 0                                                 | 4.10252                        |
| 0                                                 | 4.18193                        |
| 0                                                 | 3.79328                        |
| 0                                                 | 3.79328                        |
| 1                                                 | -3.7013                        |
| 0                                                 | 4.09611                        |
| 0                                                 | 3.81357                        |
| 0                                                 | 4.20772                        |
| 0                                                 | 3.8647                         |
| 1                                                 | -3.66082                       |
| 0                                                 | 4.04169                        |
| 0                                                 | 3.77584                        |
| 0                                                 | 4.24536                        |
| 1                                                 | -3.92136                       |
| 0                                                 | 3.86511                        |
| 0                                                 | 3.80181                        |
| 0                                                 | 4.09934                        |
| 0                                                 | 3.72492                        |
| 1                                                 | -3.60502                       |
| 0                                                 | 3.76682                        |
| 0                                                 | 3.76315                        |
| 0                                                 | 4.19265                        |
| 0                                                 | 4.09404                        |
| 1                                                 | -3.59117                       |
| 0                                                 | 3.93046                        |
| 1                                                 | -3.63175                       |
| 0                                                 | 4.11471                        |
| 1                                                 | -3.61596                       |
| 1                                                 | -3.6115                        |
| 0                                                 | 4.09408                        |
| 0                                                 | 3.8748                         |
| 0                                                 | 3.78648                        |
| 0                                                 | 4.03275                        |
| 0                                                 | 4.04659                        |
| 1                                                 | -3.6719                        |
| 0                                                 | 3.78608                        |
| 0                                                 | 4.15311                        |
| 1                                                 | -3.87188                       |
| 1                                                 | -3.68515                       |
| 1                                                 | -3.68515                       |

|   |          |
|---|----------|
| 1 | -3.62524 |
| 1 | -3.61881 |
| 1 | -3.64065 |
| 1 | -3.92685 |
| 1 | -3.86532 |
| 1 | -3.58033 |
| 1 | -3.956   |
| 1 | -3.57485 |
| 1 | -3.78337 |
| 1 | -3.57886 |
| 0 | 4.17147  |
| 0 | 3.74074  |
| 0 | 4.00674  |
| 0 | 3.79934  |
| 0 | 4.215    |
| 0 | 4.03007  |
| 0 | 4.07086  |
| 0 | 4.17059  |
| 0 | 4.33825  |
| 0 | 4.13018  |
| 0 | 3.90272  |
| 0 | 3.90272  |
| 1 | -3.5817  |
| 0 | 3.74819  |
| 0 | 3.83112  |
| 0 | 3.83611  |
| 0 | 3.98312  |
| 1 | -3.64102 |
| 1 | -3.80596 |
| 1 | -3.63018 |
| 0 | 3.74425  |
| 1 | -3.82295 |
| 0 | 3.91404  |
| 0 | 3.91404  |
| 0 | 3.77848  |
| 0 | 3.806    |
| 0 | 4.08657  |
| 0 | 3.7593   |
| 0 | 3.7593   |
| 0 | 4.1519   |
| 0 | 4.27349  |
| 1 | -3.61478 |
| 1 | -3.61478 |
| 0 | 3.97791  |
| 0 | 3.71293  |
| 1 | -3.7493  |
| 1 | -3.63772 |

|   |          |
|---|----------|
| 0 | 3.84212  |
| 0 | 4.26412  |
| 0 | 4.06946  |
| 0 | 4.11002  |
| 0 | 4.11145  |
| 0 | 3.71809  |
| 0 | 3.71809  |
| 0 | 3.85127  |
| 0 | 3.71942  |
| 0 | 3.79061  |
| 0 | 3.79061  |
| 1 | -4.01914 |
| 0 | 3.7288   |
| 0 | 3.87206  |
| 0 | 3.87206  |
| 1 | -3.86441 |
| 0 | 4.0508   |
| 0 | 4.30607  |
| 1 | -3.62959 |
| 1 | -3.62959 |
| 1 | -3.98911 |
| 0 | 3.85591  |
| 0 | 3.71375  |
| 1 | -3.80368 |
| 0 | 4.26599  |
| 1 | -3.57187 |
| 0 | 4.02122  |
| 0 | 3.96173  |
| 0 | 3.76678  |
| 0 | 4.24542  |
| 0 | 3.77182  |
| 0 | 4.28677  |
| 1 | -3.73202 |
| 1 | -3.57704 |
| 0 | 4.09899  |
| 0 | 4.00059  |
| 0 | 4.09726  |
| 1 | -3.6513  |
| 1 | -3.81929 |
| 0 | 4.00243  |
| 0 | 4.01383  |
| 0 | 4.01383  |
| 1 | -3.69731 |
| 0 | 4.12168  |
| 1 | -3.59916 |
| 1 | -3.65091 |
| 0 | 4.25213  |

|   |          |
|---|----------|
| 0 | 3.91559  |
| 1 | -3.57875 |
| 0 | 4.09612  |
| 0 | 3.83715  |
| 1 | -3.89273 |
| 0 | 4.03858  |
| 0 | 3.81865  |
| 1 | -3.65832 |
| 0 | 4.23664  |
| 0 | 4.20277  |
| 0 | 4.1014   |
| 0 | 3.81143  |
| 0 | 4.19207  |
| 0 | 4.0543   |
| 0 | 4.21603  |
| 1 | -3.732   |
| 0 | 3.71202  |
| 0 | 3.789    |
| 1 | -3.62049 |
| 0 | 3.93284  |
| 0 | 4.25554  |
| 0 | 4.11674  |
| 1 | -3.66203 |
| 0 | 4.16753  |
| 0 | 4.16753  |
| 1 | -3.61802 |
| 0 | 3.80797  |
| 1 | -3.63418 |
| 0 | 4.04987  |
| 0 | 4.05565  |
| 0 | 4.08288  |
| 1 | -3.59535 |
| 1 | -3.87545 |
| 0 | 3.71408  |
| 0 | 3.71408  |
| 0 | 4.28302  |
| 0 | 4.28302  |
| 1 | -3.81404 |
| 1 | -3.5728  |
| 1 | -3.60509 |
| 0 | 4.08551  |
| 0 | 3.75002  |
| 0 | 4.1065   |
| 0 | 3.75528  |
| 0 | 3.75528  |
| 1 | -3.77363 |
| 0 | 4.05601  |

|   |          |
|---|----------|
| 0 | 4.01962  |
| 0 | 4.15552  |
| 0 | 3.71567  |
| 0 | 3.77229  |
| 0 | 3.77229  |
| 0 | 3.87743  |
| 0 | 3.71318  |
| 0 | 4.10744  |
| 0 | 3.7151   |
| 1 | -3.70478 |
| 0 | 3.82998  |
| 1 | -3.88141 |
| 1 | -3.66845 |
| 0 | 4.06932  |
| 0 | 4.05611  |
| 0 | 3.79978  |
| 0 | 4.17094  |
| 1 | -3.62291 |
| 1 | -3.62291 |
| 0 | 3.84443  |
| 0 | 3.80825  |
| 0 | 4.14364  |
| 0 | 3.89524  |
| 1 | -3.59138 |
| 0 | 4.17169  |
| 1 | -3.59817 |
| 0 | 4.00484  |
| 0 | 4.02474  |
| 0 | 4.12029  |
| 1 | -3.92385 |
| 0 | 4.33142  |
| 0 | 3.72545  |
| 0 | 4.01853  |
| 0 | 4.12504  |
| 0 | 3.90366  |
| 0 | 3.90366  |
| 1 | -3.67748 |
| 1 | -3.57626 |
| 1 | -3.57878 |
| 0 | 4.00876  |
| 0 | 4.00876  |
| 0 | 4.20197  |
| 0 | 4.0274   |
| 0 | 3.7125   |
| 0 | 4.00052  |
| 0 | 4.00052  |
| 1 | -3.9327  |

|   |          |
|---|----------|
| 0 | 4.11653  |
| 1 | -3.58944 |
| 0 | 3.96804  |
| 0 | 3.83505  |
| 1 | -3.60852 |
| 0 | 4.06726  |
| 0 | 3.92316  |
| 0 | 3.92316  |
| 0 | 3.92041  |
| 0 | 3.80865  |
| 1 | -3.57743 |
| 1 | -3.77918 |
| 1 | -3.58182 |
| 0 | 3.9637   |
| 0 | 3.77651  |
| 0 | 4.06946  |
| 0 | 4.00859  |
| 0 | 4.12865  |
| 0 | 3.74694  |
| 0 | 4.04638  |
| 1 | -3.62176 |
| 0 | 3.90382  |
| 1 | -3.85327 |
| 1 | -3.69226 |
| 1 | -3.78885 |
| 1 | -4.02996 |
| 0 | 3.75574  |
| 0 | 3.72099  |
| 0 | 3.72099  |
| 1 | -3.64546 |
| 1 | -3.65028 |
| 0 | 4.04281  |
| 0 | 3.7284   |
| 0 | 4.0121   |
| 0 | 4.26248  |
| 0 | 4.15955  |
| 0 | 4.28858  |
| 0 | 4.06792  |
| 0 | 4.26659  |
| 0 | 3.85029  |
| 1 | -3.6259  |
| 0 | 3.92686  |
| 1 | -4.02391 |
| 1 | -3.75674 |
| 1 | -3.95538 |
| 0 | 4.08303  |
| 0 | 4.09829  |

|   |          |
|---|----------|
| 0 | 3.9759   |
| 0 | 3.72169  |
| 0 | 4.03834  |
| 0 | 4.04703  |
| 0 | 3.84809  |
| 0 | 4.21651  |
| 1 | -3.80437 |
| 0 | 4.28472  |
| 1 | -3.63383 |
| 0 | 3.85442  |
| 0 | 4.0566   |
| 1 | -3.88175 |
| 1 | -3.88175 |
| 0 | 4.2188   |
| 1 | -3.59337 |
| 0 | 4.22497  |
| 0 | 4.32641  |
| 0 | 3.74108  |
| 0 | 4.00575  |
| 0 | 3.95137  |
| 0 | 3.73667  |
| 0 | 3.79519  |
| 0 | 3.84144  |
| 0 | 3.77269  |
| 0 | 4.14689  |
| 0 | 4.00985  |
| 0 | 4.01155  |
| 0 | 4.11722  |
| 1 | -3.75513 |
| 0 | 3.75006  |
| 0 | 4.01247  |
| 0 | 4.01247  |
| 0 | 4.01717  |
| 0 | 4.01717  |
| 0 | 4.09963  |
| 0 | 3.88025  |
| 0 | 4.07821  |
| 0 | 4.01442  |
| 0 | 4.15477  |
| 0 | 3.82716  |
| 0 | 3.75809  |
| 0 | 4.02797  |
| 0 | 4.19268  |
| 0 | 4.14338  |
| 0 | 4.04702  |
| 0 | 4.28876  |
| 0 | 3.75513  |



|   |          |
|---|----------|
| 0 | 4.22211  |
| 0 | 4.02231  |
| 0 | 4.28333  |
| 0 | 3.88022  |
| 0 | 3.73685  |
| 0 | 3.8231   |
| 0 | 3.75899  |
| 0 | 4.018    |
| 0 | 3.92074  |
| 0 | 3.77844  |
| 0 | 3.72333  |
| 0 | 3.72333  |
| 0 | 4.00003  |
| 0 | 3.78011  |
| 0 | 3.90978  |
| 0 | 4.12593  |
| 0 | 4.14544  |
| 0 | 4.19923  |
| 0 | 4.0617   |
| 0 | 4.01506  |
| 1 | -4.01317 |
| 0 | 4.18667  |
| 1 | -3.94233 |
| 0 | 4.10262  |
| 0 | 3.81412  |
| 0 | 3.7844   |
| 0 | 4.06767  |
| 0 | 4.03525  |
| 0 | 4.20405  |
| 0 | 4.14924  |
| 0 | 3.73906  |
| 0 | 3.73906  |
| 0 | 4.19215  |
| 0 | 4.19215  |
| 1 | -3.6762  |
| 0 | 4.00097  |
| 1 | -3.68667 |
| 0 | 3.8918   |
| 0 | 4.06077  |
| 0 | 3.71933  |
| 0 | 4.26303  |
| 1 | -3.88675 |
| 0 | 3.81131  |
| 0 | 3.78209  |
| 0 | 4.18005  |
| 0 | 3.78574  |
| 1 | -3.60276 |

|   |          |
|---|----------|
| 0 | 3.7485   |
| 0 | 4.0885   |
| 0 | 3.75651  |
| 0 | 4.06779  |
| 1 | -3.57152 |
| 0 | 3.85684  |
| 1 | -3.73494 |
| 1 | -3.58442 |
| 0 | 4.21429  |
| 1 | -3.96347 |
| 0 | 3.95764  |
| 0 | 3.75122  |
| 0 | 3.75122  |
| 0 | 3.8492   |
| 1 | -3.5874  |
| 0 | 3.80796  |
| 0 | 3.7119   |
| 0 | 3.90144  |
| 0 | 4.0196   |
| 0 | 4.0196   |
| 0 | 3.89407  |
| 0 | 3.91039  |
| 1 | -3.6627  |
| 1 | -3.64719 |
| 0 | 4.16359  |
| 1 | -3.89533 |
| 1 | -3.60117 |
| 1 | -3.74308 |
| 0 | 4.31161  |
| 1 | -3.69068 |
| 0 | 4.06509  |
| 0 | 3.73273  |
| 0 | 4.1016   |
| 0 | 4.18156  |
| 1 | -3.57657 |
| 1 | -3.84344 |
| 0 | 4.30036  |
| 0 | 4.15326  |
| 0 | 4.2515   |
| 0 | 4.25262  |
| 0 | 3.78327  |
| 0 | 4.17852  |
| 0 | 3.87315  |
| 0 | 4.0409   |
| 0 | 4.15863  |
| 0 | 4.15863  |
| 0 | 3.73243  |

|   |          |
|---|----------|
| 0 | 4.03042  |
| 0 | 4.32432  |
| 0 | 4.32432  |
| 0 | 3.97262  |
| 1 | -3.57362 |
| 0 | 3.94845  |
| 0 | 3.77518  |
| 0 | 3.90723  |
| 1 | -3.67512 |
| 0 | 3.75173  |
| 1 | -3.64064 |
| 1 | -3.7399  |
| 0 | 4.32057  |
| 1 | -3.71248 |
| 0 | 4.15271  |
| 0 | 3.74253  |
| 0 | 3.81634  |
| 1 | -3.60071 |
| 0 | 4.00421  |
| 0 | 3.89415  |
| 0 | 3.73986  |
| 0 | 4.02909  |
| 1 | -3.59722 |
| 0 | 4.31977  |
| 1 | -3.63231 |
| 1 | -3.57247 |
| 1 | -3.58708 |
| 1 | -3.62459 |
| 1 | -3.78075 |
| 0 | 3.76736  |
| 1 | -3.61296 |
| 0 | 3.90174  |
| 1 | -3.57376 |
| 0 | 3.94491  |
| 0 | 4.17969  |
| 0 | 4.17969  |
| 1 | -3.74222 |
| 0 | 3.81488  |
| 0 | 3.88472  |
| 0 | 4.31177  |
| 0 | 3.76661  |
| 0 | 4.00732  |
| 0 | 3.82747  |
| 0 | 4.08933  |
| 0 | 4.20359  |
| 0 | 4.05768  |
| 0 | 4.06659  |

|   |          |
|---|----------|
| 0 | 3.79015  |
| 0 | 3.72004  |
| 0 | 4.28795  |
| 0 | 4.02913  |
| 0 | 3.96474  |
| 0 | 3.96474  |
| 1 | -3.6121  |
| 0 | 3.78816  |
| 0 | 4.1919   |
| 0 | 4.21539  |
| 0 | 4.1366   |
| 0 | 4.1366   |
| 0 | 4.11996  |
| 0 | 4.11996  |
| 0 | 3.78932  |
| 0 | 3.78932  |
| 0 | 4.22396  |
| 0 | 4.1788   |
| 0 | 3.77526  |
| 0 | 4.26154  |
| 0 | 4.26154  |
| 0 | 3.84833  |
| 0 | 3.806    |
| 0 | 3.806    |
| 0 | 3.91967  |
| 0 | 3.91967  |
| 1 | -4.01551 |
| 0 | 3.93373  |
| 1 | -3.68947 |
| 0 | 3.76862  |
| 0 | 3.81467  |
| 0 | 3.76527  |
| 0 | 4.09195  |
| 0 | 4.03047  |
| 0 | 4.03047  |
| 0 | 3.73631  |
| 0 | 4.09587  |
| 0 | 4.10945  |
| 0 | 4.06644  |
| 0 | 4.06644  |
| 0 | 3.79692  |
| 1 | -3.58023 |
| 0 | 3.79285  |
| 0 | 4.04643  |
| 1 | -3.65122 |
| 0 | 3.94942  |
| 0 | 4.17777  |

|   |          |
|---|----------|
| 0 | 4.20148  |
| 0 | 3.76183  |
| 0 | 4.16759  |
| 0 | 4.287    |
| 0 | 4.03975  |
| 0 | 4.24104  |
| 0 | 4.24104  |
| 0 | 4.14033  |
| 0 | 4.14033  |
| 0 | 4.02318  |
| 0 | 4.02318  |
| 0 | 4.02519  |
| 0 | 4.12581  |
| 0 | 4.00389  |
| 0 | 4.22623  |
| 0 | 4.11947  |
| 0 | 4.15104  |
| 0 | 3.89756  |
| 0 | 3.8329   |
| 0 | 3.94043  |
| 1 | -3.88371 |
| 0 | 3.87658  |
| 0 | 3.93749  |
| 0 | 4.03752  |
| 0 | 4.01324  |
| 0 | 3.76597  |
| 0 | 3.84733  |
| 0 | 3.79789  |
| 1 | -3.99565 |
| 0 | 4.09325  |
| 0 | 4.03984  |
| 0 | 3.75093  |
| 0 | 3.76988  |
| 0 | 3.73145  |
| 0 | 3.99009  |
| 0 | 4.08772  |
| 1 | -3.58343 |
| 0 | 4.05025  |
| 0 | 4.00885  |
| 0 | 3.79932  |
| 0 | 3.9305   |
| 0 | 3.94212  |
| 1 | -3.69844 |
| 0 | 4.06688  |
| 0 | 4.22213  |
| 0 | 4.10548  |
| 1 | -3.59307 |

|   |          |
|---|----------|
| 1 | -3.58323 |
| 0 | 3.75238  |
| 0 | 3.8789   |
| 1 | -3.69361 |
| 1 | -3.94577 |
| 0 | 4.03019  |
| 0 | 3.77     |
| 0 | 3.78665  |
| 0 | 4.03973  |
| 0 | 4.00646  |
| 0 | 4.16434  |
| 1 | -3.59815 |
| 0 | 3.71728  |
| 1 | -3.89151 |
| 0 | 3.78617  |
| 0 | 4.24859  |
| 0 | 3.82865  |
| 1 | -3.75956 |
| 0 | 3.89395  |
| 0 | 3.71106  |
| 0 | 4.1289   |
| 0 | 3.74711  |
| 0 | 3.9079   |
| 1 | -4.02467 |
| 0 | 4.20012  |
| 1 | -3.88115 |
| 0 | 3.75663  |
| 0 | 3.75841  |
| 1 | -3.61522 |
| 0 | 4.12118  |
| 0 | 3.82038  |
| 0 | 3.75497  |
| 0 | 3.75497  |
| 0 | 3.7581   |
| 0 | 4.024    |
| 0 | 3.84654  |
| 0 | 3.87774  |
| 1 | -3.81036 |
| 1 | -3.81653 |
| 0 | 4.12917  |
| 0 | 4.07577  |
| 0 | 4.07577  |
| 0 | 3.72432  |
| 0 | 3.90413  |
| 1 | -3.84035 |
| 1 | -3.57562 |
| 1 | -3.57826 |

|   |          |
|---|----------|
| 0 | 4.08758  |
| 0 | 3.72904  |
| 0 | 4.15284  |
| 0 | 4.23489  |
| 0 | 3.76745  |
| 1 | -3.71851 |
| 0 | 3.7193   |
| 0 | 4.32762  |
| 0 | 4.32762  |
| 0 | 3.77146  |
| 0 | 3.90615  |
| 0 | 3.85392  |
| 0 | 4.11391  |
| 1 | -3.67172 |
| 0 | 3.82143  |
| 0 | 3.9601   |
| 0 | 3.9601   |
| 0 | 4.05238  |
| 0 | 3.91628  |
| 0 | 4.02807  |
| 0 | 3.82919  |
| 0 | 3.82919  |
| 0 | 4.19598  |
| 0 | 4.19598  |
| 0 | 4.26977  |
| 0 | 4.15769  |
| 0 | 4.05182  |
| 0 | 4.29808  |
| 1 | -3.62332 |
| 0 | 4.00864  |
| 0 | 3.79419  |
| 0 | 4.04096  |
| 0 | 3.71965  |
| 0 | 4.0459   |
| 1 | -3.57515 |
| 0 | 4.11248  |
| 0 | 3.93987  |
| 0 | 3.93987  |
| 0 | 3.98466  |
| 0 | 4.19871  |
| 0 | 4.19871  |
| 0 | 3.96718  |
| 0 | 4.10491  |
| 0 | 3.98434  |
| 0 | 4.16728  |
| 0 | 4.20584  |
| 0 | 4.0144   |

|   |          |
|---|----------|
| 0 | 3.8902   |
| 1 | -3.58985 |
| 0 | 3.71499  |
| 1 | -3.84573 |
| 0 | 4.16231  |
| 1 | -3.67832 |
| 0 | 3.76403  |
| 1 | -3.60506 |
| 1 | -3.63565 |
| 1 | -3.57467 |
| 0 | 4.12973  |
| 0 | 4.16848  |
| 1 | -3.78042 |
| 0 | 3.75599  |
| 0 | 3.94947  |
| 1 | -4.01628 |
| 0 | 4.01884  |
| 0 | 3.86864  |
| 0 | 4.06706  |
| 0 | 3.9666   |
| 0 | 3.9666   |
| 0 | 4.18575  |
| 0 | 3.73078  |
| 0 | 4.04089  |
| 0 | 3.82342  |
| 1 | -3.76739 |
| 1 | -3.7594  |
| 0 | 4.15279  |
| 1 | -3.58278 |
| 1 | -3.8533  |
| 0 | 4.18     |
| 0 | 4.08723  |
| 1 | -3.7038  |
| 1 | -3.65988 |
| 1 | -3.67689 |
| 1 | -3.6108  |
| 0 | 4.16958  |
| 0 | 4.16958  |
| 0 | 3.74555  |
| 0 | 3.74555  |
| 1 | -3.83999 |
| 0 | 4.00707  |
| 0 | 3.78495  |
| 0 | 3.75141  |
| 0 | 4.1831   |
| 1 | -3.69798 |
| 0 | 3.82375  |



|   |          |
|---|----------|
| 0 | 4.03102  |
| 0 | 3.79539  |
| 0 | 4.04928  |
| 0 | 4.03839  |
| 0 | 3.74907  |
| 1 | -3.90281 |
| 0 | 4.17063  |
| 0 | 3.78018  |
| 0 | 3.74143  |
| 0 | 3.74143  |
| 0 | 3.71445  |
| 0 | 4.01624  |
| 0 | 4.01624  |
| 0 | 4.07277  |
| 0 | 3.96511  |
| 0 | 4.05712  |
| 0 | 3.74612  |
| 1 | -3.83775 |
| 0 | 3.71893  |
| 0 | 3.87959  |
| 0 | 3.87959  |
| 0 | 3.81703  |
| 1 | -3.85312 |
| 0 | 4.15232  |
| 1 | -3.62807 |
| 1 | -3.62047 |
| 0 | 3.85203  |
| 0 | 3.78437  |
| 0 | 3.78437  |
| 1 | -3.61804 |
| 0 | 4.03212  |
| 1 | -3.60398 |
| 0 | 3.73738  |
| 0 | 3.79976  |
| 1 | -3.57395 |
| 0 | 3.71946  |
| 0 | 4.03964  |
| 0 | 4.3332   |
| 0 | 4.15077  |
| 0 | 3.82558  |
| 0 | 4.31723  |
| 0 | 4.31723  |
| 0 | 4.31679  |
| 0 | 4.31679  |
| 0 | 3.86746  |
| 1 | -3.64445 |
| 1 | -3.86721 |

|   |          |
|---|----------|
| 1 | -3.63496 |
| 0 | 3.72768  |
| 0 | 3.92001  |
| 0 | 3.80026  |
| 0 | 4.13948  |
| 0 | 3.9402   |
| 1 | -3.84055 |
| 1 | -3.64905 |
| 0 | 4.02219  |
| 0 | 4.02219  |
| 0 | 3.76715  |
| 1 | -3.60695 |
| 0 | 3.82021  |
| 0 | 3.82021  |
| 0 | 3.828    |
| 0 | 3.71263  |
| 0 | 4.32184  |
| 1 | -3.91388 |
| 0 | 3.7124   |
| 0 | 3.91093  |
| 1 | -3.62466 |
| 1 | -3.76004 |
| 1 | -3.66337 |
| 0 | 3.73278  |
| 0 | 4.26463  |
| 0 | 4.02687  |
| 1 | -4.0239  |
| 1 | -3.61165 |
| 1 | -3.86527 |
| 0 | 4.23237  |
| 0 | 3.74205  |
| 0 | 3.88167  |
| 0 | 4.13526  |
| 0 | 4.32784  |
| 0 | 3.77311  |
| 1 | -3.57685 |
| 0 | 4.03263  |
| 1 | -3.65628 |
| 0 | 3.74761  |
| 0 | 3.74556  |
| 1 | -3.71214 |
| 0 | 3.73742  |
| 0 | 3.77748  |
| 0 | 4.0111   |
| 1 | -3.62554 |
| 1 | -3.65062 |
| 1 | -3.85274 |

|   |          |
|---|----------|
| 1 | -3.85274 |
| 1 | -3.69691 |
| 0 | 4.09884  |
| 0 | 4.23686  |
| 0 | 4.20891  |
| 1 | -3.90521 |
| 1 | -3.82361 |
| 1 | -4.02377 |
| 1 | -3.58997 |
| 1 | -3.82967 |
| 0 | 4.18377  |
| 0 | 3.73625  |
| 1 | -3.63575 |
| 0 | 3.74394  |
| 1 | -3.57158 |
| 1 | -4.01384 |
| 1 | -3.97105 |
| 1 | -3.63002 |
| 1 | -3.57762 |
| 1 | -4.00173 |
| 1 | -3.65662 |
| 1 | -4.02048 |
| 1 | -3.64039 |
| 1 | -3.73758 |
| 1 | -3.60489 |
| 1 | -3.69202 |
| 1 | -3.57577 |
| 1 | -3.86621 |
| 0 | 4.02998  |
| 0 | 4.23348  |
| 0 | 3.80777  |
| 0 | 4.00178  |
| 1 | -3.99712 |
| 0 | 3.84317  |
| 1 | -3.72979 |
| 0 | 4.20564  |
| 0 | 3.94599  |
| 1 | -3.69328 |
| 0 | 4.23085  |
| 1 | -3.88803 |
| 0 | 3.87657  |
| 0 | 4.02884  |
| 0 | 4.12585  |
| 1 | -3.68013 |
| 1 | -3.83729 |
| 1 | -3.59978 |
| 0 | 3.77792  |

|   |          |
|---|----------|
| 1 | -3.68788 |
| 0 | 4.02486  |
| 0 | 4.07156  |
| 0 | 3.74201  |
| 0 | 3.82991  |
| 1 | -3.94322 |
| 1 | -3.904   |
| 0 | 4.07656  |
| 0 | 3.80437  |
| 0 | 4.10488  |
| 0 | 3.80074  |
| 0 | 4.0668   |
| 0 | 4.12749  |
| 0 | 4.26854  |
| 0 | 4.23113  |
| 0 | 4.06392  |
| 0 | 4.06694  |
| 0 | 4.16214  |
| 0 | 3.79933  |
| 0 | 3.79933  |
| 0 | 4.05157  |
| 0 | 3.95544  |
| 0 | 3.86006  |
| 1 | -3.58147 |
| 0 | 3.76182  |
| 0 | 4.15847  |
| 0 | 3.79271  |
| 0 | 4.33082  |
| 0 | 3.72082  |
| 0 | 4.22976  |
| 0 | 4.11823  |
| 0 | 3.81413  |
| 1 | -3.59213 |
| 0 | 3.86754  |
| 0 | 3.94288  |
| 0 | 3.95542  |
| 0 | 4.01145  |
| 0 | 4.00096  |
| 1 | -3.57935 |
| 1 | -3.9073  |
| 0 | 3.78785  |
| 1 | -3.72334 |
| 1 | -3.70842 |
| 0 | 3.92341  |
| 0 | 4.12574  |
| 0 | 3.86109  |
| 1 | -3.74653 |

|   |          |
|---|----------|
| 0 | 4.32507  |
| 0 | 4.17217  |
| 0 | 4.01     |
| 0 | 3.94242  |
| 1 | -3.62697 |
| 0 | 3.71156  |
| 0 | 3.92989  |
| 0 | 3.99751  |
| 0 | 4.32462  |
| 0 | 4.32462  |
| 0 | 4.15857  |
| 0 | 3.71976  |
| 1 | -3.58541 |
| 1 | -3.62954 |
| 0 | 3.79342  |
| 1 | -3.69777 |
| 1 | -3.64197 |
| 1 | -3.81284 |
| 1 | -3.70169 |
| 0 | 4.02908  |
| 0 | 3.84178  |
| 0 | 4.03006  |
| 1 | -3.70229 |
| 1 | -3.64899 |
| 1 | -3.65916 |
| 1 | -3.57302 |
| 0 | 3.72144  |
| 0 | 3.72144  |
| 1 | -3.6746  |
| 0 | 3.73616  |
| 0 | 3.76404  |
| 0 | 4.0099   |
| 0 | 3.89989  |
| 0 | 3.84933  |
| 1 | -3.82014 |
| 0 | 3.91074  |
| 0 | 4.12058  |
| 1 | -4.02504 |
| 0 | 4.23773  |
| 1 | -3.60375 |
| 0 | 4.30479  |
| 0 | 4.06948  |
| 0 | 4.17761  |
| 0 | 3.71142  |
| 0 | 4.09853  |
| 0 | 3.88331  |
| 0 | 4.19663  |

|   |          |
|---|----------|
| 0 | 4.23643  |
| 0 | 4.23643  |
| 0 | 4.22807  |
| 0 | 4.22807  |
| 0 | 4.08163  |
| 0 | 4.08163  |
| 1 | -3.70903 |
| 1 | -3.73108 |
| 1 | -4.00053 |
| 0 | 4.03718  |
| 0 | 3.79131  |
| 1 | -3.59124 |
| 0 | 3.74772  |
| 0 | 4.02644  |
| 1 | -3.61843 |
| 0 | 4.334    |
| 1 | -3.94841 |
| 1 | -4.02962 |
| 0 | 4.06519  |
| 0 | 3.77972  |
| 0 | 3.96841  |
| 0 | 3.87577  |
| 1 | -3.74581 |
| 1 | -3.59335 |
| 1 | -3.76883 |
| 0 | 4.21768  |
| 1 | -3.62676 |
| 0 | 3.79356  |
| 1 | -3.83424 |
| 1 | -3.83424 |
| 1 | -3.61073 |
| 1 | -3.99081 |
| 0 | 3.81566  |
| 1 | -3.77831 |
| 0 | 3.85603  |
| 1 | -3.80699 |
| 1 | -3.65157 |
| 1 | -3.59715 |
| 0 | 3.75705  |
| 0 | 4.17966  |
| 1 | -3.57432 |
| 0 | 4.02492  |
| 1 | -3.85589 |
| 1 | -3.6145  |
| 1 | -3.81224 |
| 1 | -3.6053  |
| 0 | 4.13945  |

|   |          |
|---|----------|
| 1 | -4.02528 |
| 1 | -3.90583 |
| 1 | -3.64619 |
| 0 | 3.9685   |
| 0 | 3.90456  |
| 1 | -4.01201 |
| 0 | 4.14474  |
| 1 | -4.01022 |
| 1 | -3.60774 |
| 0 | 4.31738  |
| 1 | -4.00353 |
| 0 | 4.08812  |
| 0 | 3.7306   |
| 0 | 4.24116  |
| 0 | 4.03519  |
| 1 | -3.63514 |
| 0 | 4.10286  |
| 0 | 3.98767  |
| 0 | 3.78748  |
| 1 | -3.80713 |
| 0 | 3.71209  |
| 1 | -3.95696 |
| 0 | 4.19794  |
| 0 | 4.19794  |
| 0 | 3.86886  |
| 0 | 3.92431  |
| 0 | 3.81165  |
| 1 | -3.9101  |
| 0 | 3.74327  |
| 0 | 4.06231  |
| 0 | 3.78347  |
| 0 | 4.16113  |
| 0 | 3.79086  |
| 0 | 4.2422   |
| 0 | 3.76667  |
| 0 | 4.01139  |
| 0 | 3.75276  |
| 0 | 4.14052  |
| 0 | 4.25024  |
| 0 | 4.11085  |
| 0 | 4.11085  |
| 1 | -3.9931  |
| 1 | -3.76012 |
| 1 | -3.76012 |
| 1 | -3.67936 |
| 0 | 4.32539  |
| 1 | -3.62257 |

|   |          |
|---|----------|
| 1 | -3.62257 |
| 0 | 4.27117  |
| 0 | 3.77041  |
| 1 | -3.61294 |
| 0 | 4.09042  |
| 0 | 3.90622  |
| 1 | -3.59604 |
| 0 | 4.20633  |
| 0 | 4.19871  |
| 0 | 3.78424  |
| 0 | 4.18003  |
| 0 | 3.72005  |
| 0 | 3.81056  |
| 0 | 4.00869  |
| 0 | 3.7831   |
| 0 | 4.13291  |
| 0 | 3.71665  |
| 0 | 4.10949  |
| 0 | 4.00907  |
| 0 | 4.00907  |
| 0 | 4.14394  |
| 0 | 3.76057  |
| 1 | -3.57548 |
| 0 | 3.72984  |
| 0 | 3.81995  |
| 0 | 4.32461  |
| 0 | 3.79499  |
| 0 | 4.00735  |
| 0 | 4.00735  |
| 1 | -3.62892 |
| 0 | 4.2984   |
| 0 | 4.2984   |
| 0 | 3.81362  |
| 0 | 4.07948  |
| 0 | 3.79972  |
| 0 | 3.71203  |
| 0 | 4.22524  |
| 0 | 3.74786  |
| 0 | 3.98025  |
| 0 | 3.72245  |
| 0 | 4.29303  |
| 1 | -3.64097 |
| 1 | -3.7823  |
| 1 | -3.98998 |
| 1 | -3.98998 |
| 0 | 3.73912  |
| 0 | 4.11952  |



|   |          |
|---|----------|
| 0 | 3.93163  |
| 0 | 4.24098  |
| 0 | 3.79657  |
| 0 | 4.17745  |
| 1 | -3.83332 |
| 0 | 4.08144  |
| 1 | -3.73665 |
| 1 | -3.68049 |
| 0 | 4.02305  |
| 0 | 4.21065  |
| 0 | 4.05827  |
| 0 | 4.0016   |
| 0 | 3.9616   |
| 0 | 4.14099  |
| 0 | 4.0154   |
| 0 | 3.72012  |
| 1 | -3.71888 |
| 0 | 4.15597  |
| 0 | 4.0981   |
| 0 | 3.72442  |
| 0 | 3.79373  |
| 0 | 4.22045  |
| 0 | 3.77491  |
| 0 | 4.24373  |
| 1 | -3.66697 |
| 0 | 3.8935   |
| 0 | 3.91615  |
| 0 | 4.09197  |
| 1 | -3.82723 |
| 1 | -3.61902 |
| 1 | -3.61902 |
| 0 | 3.7558   |
| 0 | 4.24034  |
| 0 | 4.07331  |
| 0 | 4.06539  |
| 0 | 3.80318  |
| 0 | 4.01839  |
| 0 | 4.04998  |
| 0 | 4.24304  |
| 0 | 3.80387  |
| 0 | 3.81209  |
| 1 | -3.7826  |
| 0 | 4.22257  |
| 0 | 4.3153   |
| 0 | 4.26469  |
| 1 | -3.70957 |
| 0 | 3.97591  |

|   |          |
|---|----------|
| 0 | 3.97773  |
| 0 | 3.71946  |
| 0 | 4.09     |
| 0 | 3.70952  |
| 0 | 3.81831  |
| 0 | 4.03443  |
| 0 | 4.01003  |
| 1 | -3.83608 |
| 1 | -3.5923  |
| 1 | -3.75561 |
| 0 | 3.85318  |
| 0 | 4.12032  |
| 0 | 3.84567  |
| 0 | 3.89605  |
| 0 | 3.75442  |
| 0 | 4.07164  |
| 0 | 4.01382  |
| 0 | 3.8139   |
| 0 | 4.09119  |
| 1 | -3.79024 |
| 0 | 3.9714   |
| 0 | 3.87734  |
| 0 | 4.18105  |
| 1 | -3.76358 |
| 1 | -3.74745 |
| 0 | 3.75439  |
| 0 | 3.86937  |
| 0 | 4.01432  |
| 0 | 4.25888  |
| 0 | 3.78261  |
| 0 | 3.86712  |
| 0 | 3.86712  |
| 0 | 3.9259   |
| 0 | 3.80479  |
| 0 | 3.94     |
| 0 | 4.10596  |
| 1 | -3.60383 |
| 0 | 4.32523  |
| 0 | 4.32523  |
| 0 | 3.78444  |
| 0 | 4.15695  |
| 0 | 4.00071  |
| 1 | -4.00283 |
| 0 | 4.18175  |
| 0 | 3.72413  |
| 0 | 4.17481  |
| 0 | 3.98662  |

|   |          |
|---|----------|
| 0 | 4.06607  |
| 0 | 3.72413  |
| 0 | 3.72413  |
| 0 | 3.93613  |
| 0 | 4.03229  |
| 0 | 4.057    |
| 1 | -3.66316 |
| 0 | 3.75255  |
| 0 | 4.1967   |
| 0 | 4.17625  |
| 0 | 3.73788  |
| 1 | -3.74192 |
| 0 | 3.79389  |
| 0 | 4.11201  |
| 1 | -3.58235 |
| 0 | 4.05339  |
| 0 | 4.1383   |
| 0 | 3.87504  |
| 0 | 3.87504  |
| 0 | 4.09013  |
| 0 | 4.09013  |
| 0 | 3.89812  |
| 0 | 3.78947  |
| 0 | 3.98503  |
| 0 | 4.30395  |
| 0 | 4.18106  |
| 0 | 4.18106  |
| 0 | 3.93996  |
| 0 | 3.93996  |
| 0 | 3.92697  |
| 0 | 3.91835  |
| 0 | 4.02989  |
| 0 | 4.00979  |
| 0 | 4.27885  |
| 0 | 4.02786  |
| 1 | -3.96202 |
| 0 | 4.02679  |
| 0 | 3.82737  |
| 0 | 3.82737  |
| 0 | 3.84445  |
| 0 | 3.71495  |
| 0 | 3.76446  |
| 0 | 3.71981  |
| 0 | 3.72299  |
| 0 | 3.72299  |
| 0 | 4.01394  |
| 0 | 3.77107  |

|   |          |
|---|----------|
| 0 | 4.02892  |
| 0 | 3.9239   |
| 1 | -3.66256 |
| 0 | 4.12786  |
| 0 | 4.00213  |
| 0 | 3.93993  |
| 0 | 4.03759  |
| 1 | -3.64595 |
| 0 | 3.71807  |
| 1 | -3.68378 |
| 1 | -3.64329 |
| 1 | -3.58595 |
| 1 | -3.94114 |
| 1 | -3.90037 |
| 1 | -3.68654 |
| 0 | 3.72042  |
| 1 | -4.02342 |
| 1 | -3.73239 |
| 1 | -3.59914 |
| 0 | 3.74395  |
| 0 | 3.7797   |
| 1 | -3.65939 |
| 1 | -3.95616 |
| 0 | 3.99661  |
| 0 | 4.2608   |
| 1 | -3.90471 |
| 1 | -3.88469 |
| 1 | -3.58995 |
| 1 | -3.58442 |
| 1 | -3.57159 |
| 1 | -3.74763 |
| 0 | 3.72645  |
| 1 | -3.6708  |
| 1 | -3.68899 |
| 0 | 4.21883  |
| 0 | 3.77881  |
| 0 | 3.77881  |
| 1 | -3.70652 |
| 1 | -4.00176 |
| 1 | -3.6649  |
| 0 | 3.8438   |
| 1 | -3.79749 |
| 0 | 4.12835  |
| 0 | 4.30824  |
| 1 | -3.62886 |
| 0 | 3.73916  |
| 0 | 4.00749  |

|   |          |
|---|----------|
| 0 | 3.71772  |
| 0 | 3.71772  |
| 1 | -3.88694 |
| 0 | 3.87527  |
| 1 | -3.64936 |
| 0 | 3.88237  |
| 0 | 3.78093  |
| 0 | 4.05973  |
| 1 | -3.74635 |
| 0 | 3.79583  |
| 0 | 3.79583  |
| 0 | 4.28067  |
| 0 | 4.1251   |
| 1 | -3.77599 |
| 0 | 4.33762  |
| 0 | 4.33762  |
| 0 | 4.00725  |
| 0 | 4.33178  |
| 0 | 4.25882  |
| 0 | 4.13221  |
| 1 | -3.7311  |
| 1 | -3.65406 |
| 1 | -3.85188 |
| 1 | -4.00679 |
| 1 | -3.78812 |
| 0 | 4.31031  |
| 0 | 4.31031  |
| 0 | 4.32033  |
| 0 | 4.15932  |
| 0 | 4.2833   |
| 0 | 4.29852  |
| 1 | -4.02851 |
| 1 | -4.00353 |
| 1 | -3.92186 |
| 1 | -3.81754 |
| 0 | 4.24407  |
| 1 | -3.76003 |
| 1 | -3.73639 |
| 0 | 4.25668  |
| 1 | -3.58082 |
| 1 | -3.66309 |
| 1 | -3.69611 |
| 1 | -3.59402 |
| 0 | 4.24873  |
| 0 | 3.81507  |
| 0 | 4.00843  |
| 1 | -4.02846 |

|   |          |
|---|----------|
| 1 | -3.81533 |
| 1 | -3.76486 |
| 1 | -3.681   |
| 1 | -3.65162 |
| 1 | -3.60739 |
| 1 | -3.66159 |
| 1 | -3.69963 |
| 0 | 3.76143  |
| 0 | 3.94338  |
| 1 | -3.68183 |
| 1 | -3.93874 |
| 0 | 4.01448  |
| 0 | 3.95101  |
| 0 | 3.7891   |
| 0 | 4.0182   |
| 0 | 3.74016  |
| 0 | 3.74016  |
| 0 | 4.08243  |
| 0 | 4.32055  |
| 1 | -3.88777 |
| 1 | -3.7465  |
| 1 | -3.72305 |
| 1 | -3.67655 |
| 1 | -3.64095 |
| 0 | 3.76553  |
| 0 | 4.0247   |
| 1 | -3.68478 |
| 0 | 3.76418  |
| 0 | 3.96888  |
| 1 | -3.77591 |
| 0 | 4.13915  |
| 1 | -3.58017 |
| 1 | -3.82142 |
| 1 | -3.8552  |
| 1 | -3.71839 |
| 1 | -3.71839 |
| 1 | -3.57726 |
| 1 | -3.86372 |
| 1 | -3.84278 |
| 1 | -3.68465 |
| 1 | -3.58518 |
| 1 | -3.81877 |
| 1 | -3.63839 |
| 1 | -3.80162 |
| 0 | 3.70908  |
| 1 | -3.98927 |
| 1 | -3.7533  |

|   |          |
|---|----------|
| 1 | -3.76985 |
| 1 | -3.75388 |
| 0 | 3.97828  |
| 0 | 3.85286  |
| 0 | 4.1891   |
| 0 | 4.1891   |
| 1 | -3.98141 |
| 1 | -3.92554 |
| 1 | -3.85994 |
| 1 | -3.9367  |
| 1 | -3.5897  |
| 0 | 3.75109  |
| 1 | -3.70573 |
| 0 | 3.86628  |
| 0 | 4.1406   |
| 0 | 3.96885  |
| 1 | -3.65677 |
| 1 | -3.88048 |
| 1 | -3.62096 |
| 1 | -3.62708 |
| 0 | 4.09762  |
| 0 | 4.09762  |
| 0 | 4.09451  |
| 0 | 3.95241  |
| 1 | -3.63083 |
| 1 | -3.57838 |
| 0 | 3.92435  |
| 0 | 3.8294   |
| 1 | -3.71831 |
| 1 | -3.66908 |
| 0 | 4.00443  |
| 0 | 3.81996  |
| 0 | 4.04958  |
| 1 | -3.58641 |
| 1 | -3.87137 |
| 0 | 4.02516  |
| 1 | -3.70595 |
| 0 | 4.19687  |
| 1 | -3.95177 |
| 0 | 4.25033  |
| 0 | 3.78786  |
| 0 | 3.78684  |
| 0 | 4.14837  |
| 0 | 3.75613  |
| 1 | -3.58306 |
| 1 | -3.60145 |
| 1 | -3.65795 |

|   |          |
|---|----------|
| 0 | 4.07009  |
| 0 | 4.15546  |
| 1 | -3.89542 |
| 1 | -3.63546 |
| 0 | 3.88197  |
| 0 | 4.21127  |
| 0 | 4.19674  |
| 1 | -3.63487 |
| 1 | -3.78174 |
| 0 | 4.11834  |
| 0 | 3.88817  |
| 0 | 3.88817  |
| 0 | 3.7156   |
| 0 | 4.07589  |
| 1 | -4.02454 |
| 1 | -3.60919 |
| 0 | 3.74289  |
| 1 | -3.62099 |
| 0 | 4.01537  |
| 1 | -3.70495 |
| 1 | -3.65603 |
| 0 | 4.08701  |
| 0 | 3.98834  |
| 1 | -3.60079 |
| 0 | 4.23504  |
| 1 | -3.73868 |
| 1 | -3.68801 |
| 0 | 3.89964  |
| 1 | -3.69977 |
| 1 | -3.63806 |
| 1 | -3.63019 |
| 0 | 3.73449  |
| 1 | -3.84608 |
| 0 | 3.89771  |
| 0 | 4.10287  |
| 0 | 3.76671  |
| 0 | 3.76671  |
| 1 | -3.58653 |
| 0 | 3.74195  |
| 0 | 4.19181  |
| 1 | -3.57945 |
| 0 | 3.75136  |
| 1 | -3.80717 |
| 1 | -3.62555 |
| 0 | 3.97737  |
| 1 | -3.74466 |
| 0 | 3.77029  |



|   |          |
|---|----------|
| 1 | -3.70046 |
| 1 | -3.71713 |
| 1 | -3.70883 |
| 0 | 3.71363  |
| 0 | 4.22637  |
| 0 | 4.22637  |
| 1 | -3.67134 |
| 0 | 4.2144   |
| 0 | 3.88894  |
| 1 | -3.86549 |
| 0 | 3.78434  |
| 0 | 3.78434  |
| 0 | 4.162    |
| 0 | 4.01351  |
| 1 | -3.60209 |
| 0 | 4.11526  |
| 0 | 4.28286  |
| 0 | 4.21166  |
| 0 | 4.21166  |
| 1 | -3.66614 |
| 1 | -3.66614 |
| 1 | -3.66537 |
| 1 | -3.81732 |
| 0 | 3.7733   |
| 0 | 4.21692  |
| 0 | 3.83646  |
| 1 | -3.71616 |
| 1 | -3.59722 |
| 0 | 4.16159  |
| 0 | 3.91691  |
| 0 | 4.05176  |
| 1 | -3.62536 |
| 1 | -4.00674 |
| 1 | -3.58243 |
| 0 | 3.72669  |
| 1 | -3.84478 |
| 1 | -3.77993 |
| 0 | 4.15573  |
| 1 | -3.69533 |
| 0 | 4.07555  |
| 0 | 3.71641  |
| 1 | -3.89913 |
| 0 | 3.80981  |
| 0 | 3.81114  |
| 1 | -3.88783 |
| 0 | 4.19839  |
| 0 | 3.81226  |

|   |          |
|---|----------|
| 0 | 3.84004  |
| 0 | 4.00336  |
| 0 | 4.04564  |
| 0 | 3.7286   |
| 1 | -3.71701 |
| 0 | 4.01025  |
| 0 | 3.71902  |
| 0 | 4.24641  |
| 1 | -3.79157 |
| 1 | -3.59729 |
| 1 | -3.79549 |
| 1 | -3.58817 |
| 0 | 3.73193  |
| 1 | -3.60013 |
| 1 | -3.61371 |
| 1 | -3.61371 |
| 0 | 4.026    |
| 1 | -3.58813 |
| 1 | -4.02048 |
| 0 | 4.15777  |
| 0 | 4.07351  |
| 0 | 4.10147  |
| 0 | 3.82464  |
| 0 | 4.01297  |
| 0 | 3.91925  |
| 0 | 3.91925  |
| 1 | -3.77357 |
| 1 | -3.80902 |
| 0 | 3.88958  |
| 0 | 3.91027  |
| 0 | 4.03508  |
| 1 | -3.96999 |
| 0 | 3.78077  |
| 0 | 3.72531  |
| 1 | -3.79663 |
| 0 | 4.04211  |
| 0 | 4.04211  |
| 0 | 3.87043  |
| 0 | 4.06984  |
| 0 | 3.85417  |
| 0 | 3.7389   |
| 0 | 4.07048  |
| 0 | 3.73723  |
| 0 | 4.23216  |
| 0 | 3.86738  |
| 0 | 3.72514  |
| 0 | 3.72729  |

|   |          |
|---|----------|
| 0 | 3.88453  |
| 0 | 4.20225  |
| 0 | 4.20225  |
| 0 | 4.0674   |
| 0 | 4.0674   |
| 0 | 4.27445  |
| 0 | 4.27445  |
| 0 | 4.12155  |
| 0 | 4.12155  |
| 0 | 3.73007  |
| 0 | 4.22206  |
| 1 | -3.57367 |
| 0 | 3.87515  |
| 0 | 3.87515  |
| 0 | 3.92349  |
| 0 | 4.09959  |
| 0 | 4.18503  |
| 0 | 4.22432  |
| 0 | 4.08808  |
| 1 | -3.62132 |
| 1 | -3.62132 |
| 1 | -3.83158 |
| 1 | -3.83158 |
| 0 | 4.25213  |
| 0 | 4.06346  |
| 0 | 4.26159  |
| 0 | 4.19807  |
| 0 | 4.02733  |
| 0 | 3.91322  |
| 0 | 4.21889  |
| 0 | 3.92393  |
| 0 | 4.16672  |
| 0 | 3.88203  |
| 0 | 3.88203  |
| 1 | -4.01871 |
| 0 | 4.05499  |
| 0 | 4.15621  |
| 0 | 4.15621  |
| 0 | 3.76147  |
| 1 | -3.78599 |
| 1 | -3.61261 |
| 0 | 4.2801   |
| 0 | 3.7587   |
| 0 | 3.77251  |
| 0 | 4.29389  |
| 1 | -3.61046 |
| 1 | -3.7158  |

|   |          |
|---|----------|
| 0 | 3.70967  |
| 0 | 4.08148  |
| 1 | -3.75306 |
| 0 | 3.72221  |
| 0 | 3.74932  |
| 0 | 3.99335  |
| 0 | 3.70991  |
| 1 | -3.71735 |
| 0 | 3.87653  |
| 0 | 3.72285  |
| 1 | -4.02717 |
| 1 | -3.86937 |
| 1 | -3.86937 |
| 1 | -3.63642 |
| 0 | 3.71265  |
| 0 | 3.71265  |
| 0 | 4.19772  |
| 0 | 4.19772  |
| 0 | 4.29574  |
| 1 | -3.60954 |
| 0 | 4.13379  |
| 0 | 3.7971   |
| 0 | 3.95571  |
| 0 | 4.00778  |
| 0 | 3.78875  |
| 0 | 4.28146  |
| 1 | -3.63976 |
| 0 | 4.1293   |
| 1 | -3.79076 |
| 0 | 3.8964   |
| 0 | 3.8964   |
| 0 | 4.30818  |
| 0 | 4.07699  |
| 0 | 3.73257  |
| 0 | 3.73257  |
| 0 | 4.06561  |
| 1 | -3.67369 |
| 1 | -3.6169  |
| 0 | 4.02039  |
| 0 | 4.02039  |
| 1 | -3.70074 |
| 1 | -3.57163 |
| 0 | 4.24042  |
| 0 | 4.05466  |
| 1 | -3.60003 |
| 0 | 4.00465  |
| 0 | 4.06097  |

|   |          |
|---|----------|
| 0 | 4.16738  |
| 0 | 4.16738  |
| 0 | 4.04513  |
| 0 | 3.91269  |
| 1 | -3.86509 |
| 0 | 3.74818  |
| 1 | -3.71403 |
| 1 | -3.80135 |
| 0 | 4.16092  |
| 0 | 3.75395  |
| 0 | 3.74144  |
| 0 | 3.8185   |
| 0 | 4.08763  |
| 1 | -3.64362 |
| 0 | 3.83907  |
| 1 | -3.79975 |
| 0 | 3.76068  |
| 0 | 4.18413  |
| 1 | -3.57911 |
| 0 | 3.83383  |
| 0 | 3.76172  |
| 0 | 3.82644  |
| 0 | 3.82644  |
| 0 | 3.8441   |
| 0 | 4.04617  |
| 0 | 4.19195  |
| 0 | 4.14595  |
| 0 | 3.84326  |
| 0 | 3.80554  |
| 0 | 3.743    |
| 1 | -3.84186 |
| 0 | 3.83163  |
| 0 | 3.89286  |
| 0 | 4.10091  |
| 0 | 4.01624  |
| 0 | 3.86248  |
| 0 | 4.16723  |
| 0 | 4.1736   |
| 0 | 4.20451  |
| 0 | 4.12638  |
| 0 | 4.31868  |
| 1 | -3.95946 |
| 0 | 3.7979   |
| 0 | 3.7979   |
| 1 | -3.8373  |
| 0 | 4.30092  |
| 0 | 4.30092  |

|   |          |
|---|----------|
| 0 | 4.05887  |
| 0 | 4.19901  |
| 0 | 4.04072  |
| 0 | 3.74491  |
| 1 | -3.62201 |
| 1 | -3.73131 |
| 0 | 4.07556  |
| 1 | -3.69556 |
| 1 | -3.78544 |
| 1 | -3.78544 |
| 0 | 3.78365  |
| 1 | -3.90046 |
| 0 | 4.08494  |
| 0 | 3.82971  |
| 0 | 3.82971  |
| 0 | 3.90811  |
| 0 | 3.85901  |
| 0 | 4.04759  |
| 0 | 4.04759  |
| 0 | 4.19678  |
| 0 | 4.15851  |
| 0 | 4.14946  |
| 0 | 3.77206  |
| 0 | 4.18008  |
| 0 | 4.02466  |
| 0 | 4.30038  |
| 0 | 4.00588  |
| 1 | -3.63364 |
| 1 | -3.62947 |
| 1 | -3.77551 |
| 0 | 3.8189   |
| 0 | 3.93583  |
| 1 | -3.676   |
| 0 | 4.24981  |
| 1 | -4.01717 |
| 1 | -3.61116 |
| 0 | 3.90423  |
| 0 | 4.04295  |
| 1 | -3.80284 |
| 1 | -3.96906 |
| 0 | 4.10426  |
| 1 | -4.02755 |
| 0 | 4.22714  |
| 0 | 4.23866  |
| 0 | 4.06152  |
| 0 | 3.79429  |
| 0 | 4.03242  |

|   |          |
|---|----------|
| 1 | -3.69367 |
| 0 | 4.18659  |
| 1 | -3.63718 |
| 0 | 3.77463  |
| 1 | -3.61601 |
| 1 | -3.65097 |
| 0 | 3.94347  |
| 1 | -3.60003 |
| 1 | -4.02867 |
| 1 | -3.71131 |
| 1 | -3.87546 |
| 1 | -3.64468 |
| 0 | 3.73929  |
| 0 | 4.1003   |
| 0 | 4.1003   |
| 0 | 3.98893  |
| 0 | 3.98893  |
| 0 | 3.78892  |
| 0 | 4.16509  |
| 1 | -3.74305 |
| 1 | -3.76868 |
| 1 | -3.58194 |
| 0 | 4.29729  |
| 0 | 4.32082  |
| 1 | -3.68914 |
| 1 | -3.59252 |
| 0 | 3.77701  |
| 1 | -3.61781 |
| 0 | 3.83675  |
| 0 | 4.03148  |
| 0 | 4.28492  |
| 0 | 4.28492  |
| 1 | -3.66395 |
| 0 | 3.99233  |
| 0 | 3.75597  |
| 1 | -3.77746 |
| 0 | 3.77913  |
| 1 | -3.63349 |
| 0 | 4.23889  |
| 0 | 3.78759  |
| 0 | 4.00345  |
| 1 | -3.8096  |
| 1 | -3.92643 |
| 1 | -3.92728 |
| 0 | 4.0365   |
| 0 | 3.76142  |
| 0 | 4.33902  |

|   |          |
|---|----------|
| 0 | 3.77281  |
| 0 | 4.33659  |
| 0 | 3.74641  |
| 0 | 4.08215  |
| 0 | 4.1111   |
| 0 | 4.15224  |
| 0 | 4.15224  |
| 0 | 4.22969  |
| 0 | 4.22969  |
| 0 | 4.26608  |
| 0 | 4.26608  |
| 0 | 4.18099  |
| 0 | 4.18099  |
| 0 | 3.71445  |
| 0 | 3.71445  |
| 1 | -4.02779 |
| 0 | 3.75579  |
| 0 | 3.75579  |
| 0 | 3.94475  |
| 0 | 3.90748  |
| 0 | 3.90748  |
| 0 | 3.92496  |
| 0 | 3.92496  |
| 0 | 3.74089  |
| 0 | 3.74089  |
| 0 | 4.13176  |
| 0 | 4.20931  |
| 0 | 4.20931  |
| 1 | -3.77364 |
| 1 | -3.77364 |
| 0 | 4.16392  |
| 1 | -3.81582 |
| 0 | 4.08996  |
| 1 | -3.57629 |
| 1 | -3.65473 |
| 0 | 4.00903  |
| 0 | 4.22498  |
| 1 | -3.62531 |
| 1 | -3.58618 |
| 1 | -3.63169 |
| 0 | 3.84547  |
| 0 | 4.03635  |
| 0 | 4.03635  |
| 0 | 3.74196  |
| 0 | 4.16953  |
| 0 | 4.17576  |
| 0 | 4.0024   |



|   |          |
|---|----------|
| 0 | 3.9559   |
| 0 | 4.31375  |
| 0 | 3.8298   |
| 1 | -3.62638 |
| 0 | 4.29928  |
| 0 | 3.84901  |
| 0 | 4.15569  |
| 0 | 4.32254  |
| 0 | 4.13729  |
| 0 | 4.13729  |
| 0 | 3.80243  |
| 0 | 3.80243  |
| 0 | 4.04248  |
| 0 | 3.88032  |
| 0 | 3.94888  |
| 0 | 3.94888  |
| 0 | 3.97217  |
| 0 | 4.04058  |
| 0 | 3.99368  |
| 0 | 3.75732  |
| 0 | 4.15511  |
| 0 | 4.17226  |
| 0 | 4.01416  |
| 0 | 4.03362  |
| 1 | -3.74766 |
| 0 | 4.11064  |
| 0 | 4.22981  |
| 1 | -3.61453 |
| 0 | 3.88617  |
| 1 | -3.75806 |
| 0 | 3.77246  |
| 0 | 3.83267  |
| 0 | 4.16566  |
| 1 | -3.83348 |
| 0 | 3.85177  |
| 0 | 4.12985  |
| 0 | 4.12985  |
| 1 | -3.68525 |
| 0 | 4.00442  |
| 0 | 4.05441  |
| 0 | 4.12832  |
| 1 | -3.6301  |
| 0 | 4.15995  |
| 1 | -3.65516 |
| 1 | -3.68936 |
| 1 | -3.98447 |
| 0 | 4.24458  |

|   |          |
|---|----------|
| 1 | -3.62764 |
| 1 | -3.59039 |
| 1 | -3.70196 |
| 0 | 4.05157  |
| 1 | -3.69967 |
| 1 | -3.68445 |
| 0 | 4.1039   |
| 1 | -3.65656 |
| 1 | -3.66808 |
| 1 | -3.73181 |
| 0 | 4.09445  |
| 0 | 3.74676  |
| 0 | 4.15862  |
| 0 | 3.72408  |
| 0 | 4.11853  |
| 0 | 3.76672  |
| 0 | 4.04549  |
| 0 | 4.04549  |
| 1 | -3.69096 |
| 0 | 4.16078  |
| 0 | 4.16078  |
| 0 | 3.8771   |
| 0 | 4.05039  |
| 0 | 3.71649  |
| 0 | 3.83586  |
| 0 | 4.21127  |
| 1 | -3.66061 |
| 0 | 3.81287  |
| 0 | 3.7276   |
| 1 | -3.78895 |
| 1 | -3.90003 |
| 1 | -3.60237 |
| 1 | -3.60237 |
| 0 | 4.12912  |
| 1 | -4.01095 |
| 1 | -3.68065 |
| 0 | 4.08469  |
| 0 | 4.08613  |
| 0 | 4.0057   |
| 1 | -3.7713  |
| 0 | 3.77626  |
| 0 | 3.88669  |
| 0 | 4.0173   |
| 0 | 4.04521  |
| 0 | 3.74094  |
| 1 | -3.99314 |
| 0 | 4.12053  |

|   |          |
|---|----------|
| 0 | 4.07327  |
| 0 | 4.0041   |
| 0 | 3.81901  |
| 0 | 4.23093  |
| 0 | 4.18215  |
| 1 | -3.60245 |
| 0 | 4.02991  |
| 1 | -4.02212 |
| 0 | 4.01416  |
| 0 | 3.75031  |
| 1 | -3.70457 |
| 1 | -3.62185 |
| 0 | 4.13923  |
| 1 | -3.82249 |
| 0 | 4.10454  |
| 0 | 4.10454  |
| 0 | 4.03184  |
| 0 | 3.753    |
| 0 | 4.2392   |
| 0 | 4.08747  |
| 1 | -3.71878 |
| 1 | -3.5998  |
| 1 | -3.74995 |
| 0 | 4.10669  |
| 1 | -3.82852 |
| 0 | 3.73752  |
| 0 | 4.31766  |
| 1 | -3.70186 |
| 0 | 3.97667  |
| 1 | -3.7037  |
| 0 | 3.81899  |
| 0 | 4.09054  |
| 0 | 3.78413  |
| 0 | 4.00908  |
| 0 | 4.32934  |
| 0 | 4.1966   |
| 0 | 3.74436  |
| 1 | -3.59326 |
| 1 | -3.58084 |
| 1 | -3.59145 |
| 0 | 4.07677  |
| 0 | 4.1472   |
| 1 | -3.87197 |
| 0 | 3.77041  |
| 0 | 3.73758  |
| 0 | 4.19467  |
| 1 | -3.67922 |

|   |          |
|---|----------|
| 1 | -3.63984 |
| 0 | 3.91577  |
| 0 | 4.12501  |
| 0 | 3.89992  |
| 1 | -3.7107  |
| 1 | -3.78624 |
| 1 | -3.77208 |
| 0 | 3.85108  |
| 0 | 4.03836  |
| 0 | 3.71298  |
| 0 | 4.27667  |
| 1 | -3.8877  |
| 0 | 4.04855  |
| 0 | 4.04855  |
| 0 | 3.8452   |
| 1 | -3.80152 |
| 0 | 3.75596  |
| 0 | 3.73355  |
| 0 | 3.86327  |
| 0 | 4.01152  |
| 1 | -3.5779  |
| 1 | -3.74485 |
| 0 | 4.16992  |
| 0 | 4.16992  |
| 0 | 4.07892  |
| 1 | -3.68316 |
| 1 | -3.59317 |
| 0 | 4.30303  |
| 1 | -3.65007 |
| 1 | -3.84743 |
| 0 | 3.82856  |
| 0 | 4.26879  |
| 0 | 4.25925  |
| 0 | 3.84369  |
| 0 | 3.82882  |
| 0 | 4.02721  |
| 1 | -3.68453 |
| 0 | 3.75017  |
| 1 | -3.65033 |
| 0 | 4.1255   |
| 0 | 3.84381  |
| 0 | 3.90418  |
| 0 | 4.29874  |
| 1 | -3.59869 |
| 1 | -3.70526 |
| 1 | -3.79608 |
| 0 | 3.84297  |

|   |          |
|---|----------|
| 0 | 4.28681  |
| 1 | -3.5772  |
| 1 | -3.75862 |
| 0 | 4.15584  |
| 0 | 3.76915  |
| 0 | 4.04076  |
| 1 | -3.82257 |
| 0 | 4.16273  |
| 0 | 4.08934  |
| 0 | 4.2334   |
| 0 | 4.2334   |
| 0 | 3.91568  |
| 0 | 4.27533  |
| 1 | -3.80839 |
| 0 | 3.97254  |
| 0 | 4.16778  |
| 1 | -3.66669 |
| 1 | -4.02994 |
| 0 | 3.89422  |
| 0 | 3.84449  |
| 1 | -3.83064 |
| 1 | -3.67259 |
| 0 | 3.86527  |
| 0 | 4.28376  |
| 0 | 3.95515  |
| 1 | -3.78565 |
| 1 | -3.72505 |
| 1 | -3.65052 |
| 1 | -3.83933 |
| 0 | 4.11832  |
| 0 | 4.03359  |
| 0 | 3.72923  |
| 0 | 4.20724  |
| 0 | 3.83242  |
| 0 | 3.86007  |
| 0 | 4.24872  |
| 0 | 4.02655  |
| 1 | -3.69125 |
| 0 | 3.71992  |
| 1 | -3.79362 |
| 1 | -3.87101 |
| 0 | 4.18343  |
| 1 | -3.81842 |
| 1 | -3.58697 |
| 0 | 4.02381  |
| 0 | 4.10109  |
| 1 | -3.72741 |

|   |          |
|---|----------|
| 1 | -3.8361  |
| 1 | -3.76859 |
| 0 | 4.21092  |
| 0 | 3.73883  |
| 0 | 4.12399  |
| 1 | -3.6803  |
| 0 | 4.09237  |
| 0 | 3.99517  |
| 0 | 3.7727   |
| 0 | 3.7727   |
| 0 | 4.03335  |
| 0 | 3.72603  |
| 0 | 4.01807  |
| 0 | 4.01096  |
| 0 | 4.14719  |
| 0 | 3.96212  |
| 1 | -3.67463 |
| 0 | 4.17932  |
| 1 | -4.02871 |
| 0 | 4.07588  |
| 0 | 3.93922  |
| 0 | 4.00688  |
| 0 | 4.03794  |
| 0 | 4.03794  |
| 1 | -3.66713 |
| 1 | -3.66713 |
| 0 | 3.86352  |
| 0 | 3.86352  |
| 1 | -3.72044 |
| 1 | -3.81285 |
| 1 | -3.65057 |
| 1 | -3.58858 |
| 0 | 4.25846  |
| 0 | 4.25846  |
| 0 | 3.93797  |
| 0 | 3.93797  |
| 0 | 4.01918  |
| 0 | 3.76632  |
| 0 | 3.85839  |
| 0 | 3.8033   |
| 0 | 4.19361  |
| 0 | 3.82053  |
| 0 | 4.22763  |
| 0 | 4.05     |
| 0 | 4.1977   |
| 0 | 3.7345   |
| 0 | 4.053    |

|   |          |
|---|----------|
| 0 | 4.11595  |
| 0 | 4.08605  |
| 0 | 4.02163  |
| 0 | 4.05666  |
| 0 | 4.07555  |
| 0 | 3.81322  |
| 0 | 4.1726   |
| 0 | 3.93948  |
| 0 | 3.75611  |
| 0 | 3.86928  |
| 0 | 4.17571  |
| 1 | -3.92358 |
| 0 | 4.06565  |
| 1 | -3.66575 |
| 0 | 3.99164  |
| 0 | 4.04819  |
| 1 | -3.95782 |
| 1 | -3.58256 |
| 1 | -3.64317 |
| 1 | -3.64317 |
| 0 | 3.75197  |
| 0 | 3.91991  |
| 0 | 3.78095  |
| 0 | 4.05075  |
| 1 | -4.00799 |
| 1 | -3.7382  |
| 0 | 3.71184  |
| 0 | 4.30995  |
| 0 | 4.30703  |
| 0 | 4.16103  |
| 0 | 4.16103  |
| 0 | 4.01465  |
| 0 | 3.91696  |
| 0 | 3.91696  |
| 1 | -3.6419  |
| 1 | -3.80219 |
| 0 | 3.84855  |
| 0 | 4.10641  |
| 0 | 3.7379   |
| 1 | -3.86098 |
| 0 | 4.11873  |
| 0 | 4.04814  |
| 0 | 4.25871  |
| 0 | 3.88205  |
| 1 | -3.57179 |
| 1 | -3.87409 |
| 0 | 3.91372  |

|   |          |
|---|----------|
| 0 | 3.80623  |
| 0 | 3.77644  |
| 0 | 3.78465  |
| 0 | 4.14694  |
| 0 | 3.92565  |
| 1 | -4.00701 |
| 1 | -3.74145 |
| 1 | -4.00378 |
| 0 | 4.24077  |
| 0 | 3.73085  |
| 0 | 4.08468  |
| 1 | -3.60879 |
| 0 | 4.14783  |
| 0 | 3.72483  |
| 1 | -3.60692 |
| 0 | 4.33243  |
| 0 | 3.7696   |
| 1 | -3.63927 |
| 0 | 3.8311   |
| 0 | 4.00497  |
| 1 | -3.69039 |
| 1 | -3.7164  |
| 1 | -3.81029 |
| 1 | -3.60761 |
| 1 | -3.58136 |
| 0 | 4.08466  |
| 1 | -3.5834  |
| 1 | -3.77144 |
| 0 | 4.08643  |
| 1 | -3.88855 |
| 0 | 3.79129  |
| 0 | 3.71077  |
| 0 | 4.028    |
| 0 | 4.028    |
| 0 | 4.02317  |
| 0 | 4.02317  |
| 0 | 3.91392  |
| 0 | 4.03241  |
| 0 | 3.78113  |
| 1 | -3.67353 |
| 0 | 3.75724  |
| 0 | 3.82403  |
| 0 | 4.11037  |
| 0 | 3.98189  |
| 0 | 4.14476  |
| 1 | -3.73108 |
| 1 | -3.71371 |



|   |          |
|---|----------|
| 1 | -3.63908 |
| 1 | -3.59562 |
| 1 | -3.77165 |
| 0 | 3.79807  |
| 1 | -3.63189 |
| 0 | 4.01922  |
| 0 | 4.01922  |
| 0 | 3.71884  |
| 0 | 3.71884  |
| 1 | -3.69651 |
| 1 | -3.63062 |
| 0 | 4.13748  |
| 1 | -4.00835 |
| 0 | 4.04079  |
| 0 | 4.08079  |
| 1 | -3.66396 |
| 1 | -3.66396 |
| 0 | 4.04445  |
| 0 | 4.04445  |
| 1 | -3.79456 |
| 1 | -3.9527  |
| 0 | 3.97211  |
| 1 | -3.93912 |
| 1 | -3.58322 |
| 1 | -3.73862 |
| 1 | -3.63008 |
| 1 | -3.70334 |
| 1 | -3.69407 |
| 1 | -3.83748 |
| 1 | -3.69715 |
| 1 | -3.61594 |
| 0 | 3.9492   |
| 0 | 3.80253  |
| 1 | -3.7955  |
| 1 | -3.58678 |
| 1 | -3.72859 |
| 1 | -3.73879 |
| 1 | -3.57585 |
| 1 | -3.69688 |
| 1 | -3.79711 |
| 1 | -3.67382 |
| 1 | -3.6704  |
| 0 | 4.31206  |
| 0 | 3.73194  |
| 1 | -3.68269 |
| 1 | -3.6882  |
| 0 | 4.00939  |

|   |          |
|---|----------|
| 1 | -3.58455 |
| 1 | -3.89566 |
| 0 | 4.09328  |
| 0 | 3.78156  |
| 0 | 3.73292  |
| 0 | 3.73292  |
| 0 | 3.89634  |
| 0 | 4.2568   |
| 1 | -3.9779  |
| 0 | 4.05114  |
| 0 | 3.83303  |
| 1 | -3.85114 |
| 0 | 4.13632  |
| 0 | 4.11368  |
| 0 | 4.12694  |
| 0 | 4.30992  |
| 0 | 4.30992  |
| 0 | 3.84792  |
| 0 | 4.27546  |
| 0 | 4.07804  |
| 0 | 3.81921  |
| 0 | 3.88391  |
| 0 | 4.02192  |
| 0 | 4.04881  |
| 0 | 4.09894  |
| 0 | 3.81709  |
| 0 | 3.75138  |
| 0 | 4.12448  |
| 0 | 4.26106  |
| 0 | 4.0289   |
| 0 | 4.02267  |
| 1 | -3.76498 |
| 1 | -3.62495 |
| 0 | 4.0367   |
| 0 | 4.0367   |
| 1 | -3.57339 |
| 0 | 3.72373  |
| 1 | -3.65465 |
| 1 | -3.65465 |
| 0 | 4.14929  |
| 0 | 4.21842  |
| 0 | 4.22031  |
| 0 | 4.22031  |
| 0 | 3.83131  |
| 0 | 3.83131  |
| 0 | 4.08559  |
| 0 | 4.0469   |

|   |          |
|---|----------|
| 1 | -3.93181 |
| 0 | 4.17014  |
| 1 | -3.85326 |
| 0 | 3.82391  |
| 0 | 3.82391  |
| 0 | 3.77958  |
| 0 | 3.77958  |
| 0 | 3.93912  |
| 0 | 3.93912  |
| 0 | 3.77843  |
| 0 | 4.11527  |
| 1 | -4.01789 |
| 0 | 4.08626  |
| 1 | -3.9345  |
| 0 | 4.0373   |
| 1 | -3.64134 |
| 0 | 3.95972  |
| 0 | 3.767    |
| 1 | -3.60365 |
| 1 | -3.58407 |
| 0 | 4.14963  |
| 0 | 4.03211  |
| 0 | 4.03211  |
| 1 | -3.62733 |
| 1 | -3.62733 |
| 0 | 3.97282  |
| 0 | 4.00636  |
| 0 | 4.09741  |
| 0 | 4.03027  |
| 0 | 4.01436  |
| 1 | -3.87111 |
| 0 | 4.00239  |
| 0 | 4.00239  |
| 0 | 3.75444  |
| 0 | 3.90246  |
| 0 | 4.23814  |
| 1 | -3.60016 |
| 0 | 4.24327  |
| 0 | 3.88472  |
| 0 | 3.88472  |
| 0 | 4.21643  |
| 0 | 4.10854  |
| 0 | 3.7149   |
| 1 | -3.86271 |
| 0 | 3.74582  |
| 0 | 4.05699  |
| 0 | 3.78041  |

|   |          |
|---|----------|
| 1 | -3.82597 |
| 0 | 3.82054  |
| 0 | 3.82054  |
| 0 | 4.18795  |
| 0 | 4.18795  |
| 0 | 3.83101  |
| 1 | -3.89386 |
| 0 | 4.18365  |
| 0 | 4.12312  |
| 0 | 4.12312  |
| 0 | 3.75088  |
| 0 | 3.75088  |
| 0 | 4.2043   |
| 0 | 4.27773  |
| 0 | 3.80062  |
| 1 | -3.74651 |
| 0 | 4.09933  |
| 0 | 4.23777  |
| 0 | 4.16151  |
| 0 | 3.76405  |
| 0 | 3.75393  |
| 0 | 4.10647  |
| 1 | -3.6297  |
| 0 | 4.05188  |
| 0 | 3.78748  |
| 0 | 3.7428   |
| 1 | -3.80208 |
| 0 | 4.33097  |
| 1 | -3.77853 |
| 0 | 4.05239  |
| 0 | 4.05239  |
| 0 | 4.24797  |
| 0 | 4.16956  |
| 0 | 4.13461  |
| 0 | 4.09012  |
| 0 | 4.07009  |
| 1 | -3.92478 |
| 0 | 4.23655  |
| 1 | -3.80578 |
| 1 | -3.62551 |
| 1 | -3.62702 |
| 0 | 4.19434  |
| 1 | -3.68913 |
| 1 | -3.68106 |
| 0 | 3.80218  |
| 1 | -3.61116 |
| 1 | -3.62572 |

|   |          |
|---|----------|
| 0 | 4.07413  |
| 0 | 3.71344  |
| 0 | 3.74336  |
| 0 | 3.75857  |
| 1 | -3.75789 |
| 0 | 3.71534  |
| 1 | -3.58673 |
| 1 | -3.58673 |
| 1 | -3.59165 |
| 0 | 4.16965  |
| 1 | -3.71201 |
| 1 | -3.61136 |
| 0 | 3.90398  |
| 1 | -3.60534 |
| 1 | -3.87773 |
| 1 | -3.59773 |
| 0 | 3.76964  |
| 0 | 4.01119  |
| 1 | -3.61176 |
| 1 | -3.62747 |
| 0 | 4.00311  |
| 1 | -3.58319 |
| 1 | -3.8584  |
| 1 | -3.61281 |
| 1 | -3.65274 |
| 1 | -3.80178 |
| 1 | -3.63937 |
| 0 | 4.03121  |
| 0 | 3.81252  |
| 0 | 3.72487  |
| 0 | 4.04525  |
| 0 | 4.10338  |
| 0 | 4.08841  |
| 1 | -3.61026 |
| 0 | 3.92137  |
| 0 | 4.11298  |
| 0 | 3.80732  |
| 1 | -3.73136 |
| 0 | 3.80853  |
| 1 | -3.80992 |
| 0 | 3.72386  |
| 1 | -3.67588 |
| 0 | 4.16587  |
| 1 | -3.72339 |
| 0 | 4.20114  |
| 0 | 4.04588  |
| 0 | 4.04588  |

|   |          |
|---|----------|
| 0 | 3.75246  |
| 1 | -3.6778  |
| 1 | -3.66684 |
| 0 | 3.77351  |
| 0 | 4.02919  |
| 0 | 4.03209  |
| 1 | -3.69309 |
| 0 | 4.29507  |
| 1 | -3.64447 |
| 1 | -3.64447 |
| 0 | 4.10241  |
| 0 | 4.10241  |
| 0 | 4.01084  |
| 0 | 4.21113  |
| 0 | 4.23411  |
| 1 | -3.91329 |
| 1 | -4.00824 |
| 1 | -3.77935 |
| 1 | -3.64969 |
| 0 | 4.27812  |
| 0 | 3.73231  |
| 1 | -3.75969 |
| 0 | 4.00116  |
| 0 | 3.8282   |
| 0 | 3.8282   |
| 0 | 4.12764  |
| 1 | -4.00123 |
| 0 | 4.17842  |
| 1 | -3.66882 |
| 0 | 3.8989   |
| 1 | -3.83218 |
| 0 | 4.13486  |
| 0 | 3.90735  |
| 0 | 4.10616  |
| 1 | -3.57576 |
| 1 | -3.69509 |
| 1 | -3.79209 |
| 0 | 3.90802  |
| 0 | 3.9655   |
| 0 | 4.1475   |
| 0 | 3.80925  |
| 0 | 3.76144  |
| 1 | -3.8985  |
| 1 | -3.57697 |
| 1 | -4.00787 |
| 0 | 4.28372  |
| 1 | -3.62218 |

|   |          |
|---|----------|
| 1 | -3.60397 |
| 1 | -3.77038 |
| 0 | 3.77793  |
| 0 | 3.77793  |
| 0 | 4.00491  |
| 1 | -3.70621 |
| 1 | -3.8455  |
| 1 | -3.57741 |
| 1 | -3.77312 |
| 1 | -3.67536 |
| 0 | 3.729    |
| 0 | 3.77763  |
| 1 | -3.61076 |
| 1 | -3.65147 |
| 0 | 3.81626  |
| 0 | 3.97608  |
| 0 | 3.78042  |
| 0 | 3.78042  |
| 0 | 4.02966  |
| 1 | -3.69965 |
| 1 | -4.02025 |
| 1 | -3.6802  |
| 0 | 4.10293  |
| 0 | 3.74297  |
| 1 | -3.60523 |
| 1 | -3.6421  |
| 0 | 4.00209  |
| 0 | 3.92242  |
| 1 | -3.7077  |
| 1 | -3.72639 |
| 0 | 4.28287  |
| 1 | -3.62339 |
| 0 | 3.79314  |
| 0 | 4.08427  |
| 0 | 4.08427  |
| 1 | -3.64774 |
| 0 | 4.02395  |
| 0 | 3.89791  |
| 0 | 3.7243   |
| 0 | 3.7243   |
| 1 | -3.75553 |
| 0 | 3.772    |
| 1 | -3.58737 |
| 0 | 4.13235  |
| 0 | 4.05387  |
| 1 | -3.60546 |
| 0 | 4.18761  |

|   |          |
|---|----------|
| 0 | 3.80399  |
| 1 | -3.70427 |
| 0 | 3.94308  |
| 1 | -3.62149 |
| 1 | -3.65623 |
| 1 | -3.62141 |
| 0 | 4.09818  |
| 1 | -3.60174 |
| 1 | -3.65593 |
| 1 | -3.75987 |
| 1 | -3.62932 |
| 0 | 4.1364   |
| 0 | 3.89878  |
| 0 | 4.28019  |
| 0 | 3.74764  |
| 0 | 3.82013  |
| 0 | 4.07156  |
| 1 | -3.76188 |
| 0 | 4.25365  |
| 0 | 3.82209  |
| 0 | 3.71645  |
| 1 | -3.7181  |
| 0 | 3.81555  |
| 0 | 3.81555  |
| 1 | -4.02509 |
| 0 | 4.03856  |
| 1 | -3.8582  |
| 0 | 3.82883  |
| 0 | 4.17251  |
| 1 | -3.60367 |
| 0 | 3.71265  |
| 1 | -3.8811  |
| 1 | -3.86369 |
| 0 | 3.74606  |
| 0 | 4.01008  |
| 1 | -3.6226  |
| 0 | 3.76263  |
| 0 | 4.21431  |
| 0 | 3.86882  |
| 1 | -3.6009  |
| 1 | -3.60284 |
| 1 | -3.64407 |
| 1 | -3.84219 |
| 1 | -3.6327  |
| 0 | 3.7622   |
| 0 | 4.27642  |
| 0 | 3.76994  |



|     |          |
|-----|----------|
| 1   | -3.79439 |
| 1   | -3.6504  |
| 1   | -3.65586 |
| 0   | 4.2496   |
| 0.5 | 4.06604  |
| 1   | -3.63001 |
| 0   | 4.03117  |
| 1   | -3.70787 |
| 0   | 4.24797  |
| 1   | -3.57842 |
| 1   | -3.86792 |
| 1   | -3.59065 |
| 1   | -4.0074  |
| 1   | -3.62959 |
| 0   | 3.97312  |
| 1   | -3.63525 |
| 1   | -3.63525 |
| 1   | -3.59105 |
| 0   | 4.16193  |
| 0   | 4.21257  |
| 1   | -3.7167  |
| 0   | 3.73609  |
| 0   | 3.73609  |
| 1   | -3.75122 |
| 0   | 3.7361   |
| 0   | 4.11773  |
| 0   | 3.77418  |
| 0   | 4.24601  |
| 1   | -3.86772 |
| 0   | 4.06454  |
| 0   | 4.05311  |
| 0   | 3.7509   |
| 0   | 3.86745  |
| 1   | -4.02937 |
| 0   | 4.0282   |
| 0   | 3.89434  |
| 0   | 3.88612  |
| 1   | -3.89881 |
| 0   | 3.74718  |
| 0   | 4.03669  |
| 0   | 4.06429  |
| 0   | 4.00506  |
| 0   | 4.03601  |
| 0   | 3.88904  |
| 1   | -3.64741 |
| 1   | -3.86297 |
| 0   | 4.25316  |

|   |          |
|---|----------|
| 0 | 3.71024  |
| 0 | 3.71024  |
| 0 | 3.84665  |
| 0 | 3.84665  |
| 0 | 3.793    |
| 0 | 3.95248  |
| 0 | 4.03083  |
| 1 | -3.61267 |
| 0 | 3.72138  |
| 0 | 4.08644  |
| 0 | 4.00273  |
| 0 | 4.00273  |
| 0 | 3.85132  |
| 0 | 3.86436  |
| 0 | 4.30346  |
| 0 | 4.05817  |
| 1 | -3.60498 |
| 0 | 4.00781  |
| 1 | -3.72223 |
| 0 | 4.13254  |
| 1 | -3.80349 |
| 0 | 4.12226  |
| 1 | -3.75175 |
| 1 | -3.79663 |
| 1 | -3.68117 |
| 0 | 3.92931  |
| 0 | 3.88524  |
| 0 | 4.15963  |
| 0 | 4.24518  |
| 0 | 3.71024  |
| 1 | -4.01582 |
| 1 | -3.57875 |
| 0 | 3.79788  |
| 0 | 3.72294  |
| 0 | 3.78448  |
| 0 | 3.7315   |
| 0 | 3.79451  |
| 0 | 4.27808  |
| 0 | 3.99079  |
| 0 | 3.70946  |
| 0 | 3.9577   |
| 0 | 4.03465  |
| 0 | 4.03465  |
| 0 | 3.78691  |
| 0 | 3.75815  |
| 0 | 3.81591  |
| 1 | -3.59196 |

|   |          |
|---|----------|
| 0 | 3.71382  |
| 0 | 3.8121   |
| 0 | 3.89135  |
| 1 | -3.59029 |
| 0 | 4.04994  |
| 0 | 4.04994  |
| 0 | 3.79734  |
| 1 | -3.61302 |
| 0 | 3.95694  |
| 0 | 4.12443  |
| 1 | -3.7057  |
| 0 | 3.90146  |
| 1 | -3.66167 |
| 0 | 4.04153  |
| 0 | 3.8443   |
| 0 | 4.30205  |
| 0 | 3.921    |
| 1 | -3.63486 |
| 1 | -3.63889 |
| 0 | 3.71615  |
| 0 | 3.76818  |
| 0 | 4.08523  |
| 0 | 3.76628  |
| 1 | -3.86629 |
| 1 | -3.57638 |
| 0 | 3.76107  |
| 1 | -3.62981 |
| 0 | 4.02581  |
| 1 | -3.6577  |
| 0 | 4.24112  |
| 0 | 4.24112  |
| 0 | 3.83965  |
| 0 | 3.7868   |
| 0 | 3.99149  |
| 0 | 3.74036  |
| 0 | 3.80778  |
| 0 | 4.08201  |
| 1 | -3.665   |
| 0 | 3.73528  |
| 1 | -3.83502 |
| 0 | 4.31946  |
| 1 | -3.61774 |
| 0 | 3.78584  |
| 1 | -3.73364 |
| 1 | -3.95712 |
| 0 | 3.72332  |
| 0 | 4.02396  |

|   |          |
|---|----------|
| 1 | -3.73165 |
| 0 | 3.9342   |
| 1 | -3.57702 |
| 0 | 3.72461  |
| 0 | 3.74738  |
| 0 | 4.12231  |
| 0 | 4.03331  |
| 0 | 3.82543  |
| 1 | -3.58224 |
| 1 | -3.58224 |
| 0 | 4.08411  |
| 0 | 4.08411  |
| 0 | 4.10035  |
| 0 | 4.10035  |
| 0 | 4.14008  |
| 0 | 4.02512  |
| 0 | 3.76791  |
| 1 | -4.02011 |
| 1 | -3.67412 |
| 1 | -3.77479 |
| 1 | -3.7073  |
| 0 | 4.06843  |
| 1 | -3.57231 |
| 0 | 3.81498  |
| 0 | 4.24939  |
| 0 | 4.24939  |
| 0 | 3.85042  |
| 0 | 3.85042  |
| 0 | 4.04882  |
| 0 | 4.10599  |
| 0 | 4.2184   |
| 0 | 4.14041  |
| 0 | 3.87682  |
| 0 | 3.90018  |
| 0 | 4.00266  |
| 0 | 4.04677  |
| 0 | 4.00992  |
| 0 | 4.07873  |
| 0 | 4.07873  |
| 1 | -3.76718 |
| 0 | 3.82201  |
| 1 | -3.92715 |
| 0 | 4.2912   |
| 0 | 4.2912   |
| 0 | 3.93131  |
| 0 | 4.26583  |
| 0 | 4.27944  |

|   |          |
|---|----------|
| 1 | -3.6159  |
| 0 | 4.1055   |
| 0 | 3.90285  |
| 0 | 3.83962  |
| 0 | 3.86951  |
| 0 | 3.72212  |
| 0 | 3.7674   |
| 0 | 3.72933  |
| 1 | -3.86329 |
| 0 | 3.79919  |
| 0 | 4.06416  |
| 0 | 3.97732  |
| 0 | 3.87097  |
| 0 | 3.75499  |
| 0 | 3.90425  |
| 0 | 3.76845  |
| 0 | 4.02878  |
| 0 | 3.87711  |
| 1 | -3.5965  |
| 0 | 3.75342  |
| 0 | 3.72887  |
| 0 | 4.0355   |
| 0 | 3.80082  |
| 0 | 3.71613  |
| 1 | -3.66598 |
| 0 | 4.07276  |
| 0 | 3.82978  |
| 0 | 3.88867  |
| 0 | 3.80641  |
| 1 | -3.86046 |
| 1 | -3.79065 |
| 1 | -3.8106  |
| 0 | 4.02499  |
| 0 | 3.81135  |
| 1 | -3.58958 |
| 0 | 4.20646  |
| 0 | 4.20887  |
| 0 | 4.20887  |
| 1 | -3.69207 |
| 0 | 4.1599   |
| 0 | 4.02365  |
| 0 | 4.02365  |
| 0 | 4.1235   |
| 0 | 4.1235   |
| 0 | 3.73434  |
| 0 | 3.72079  |
| 0 | 4.03644  |

|   |          |
|---|----------|
| 0 | 4.16904  |
| 0 | 3.92323  |
| 1 | -3.85963 |
| 0 | 4.23916  |
| 0 | 3.9327   |
| 1 | -3.57254 |
| 1 | -3.67318 |
| 0 | 3.96097  |
| 0 | 4.1597   |
| 0 | 4.07759  |
| 1 | -3.92191 |
| 0 | 4.07553  |
| 0 | 3.86586  |
| 0 | 3.90328  |
| 0 | 3.84216  |
| 1 | -4.00735 |
| 0 | 3.72889  |
| 0 | 3.98479  |
| 0 | 4.18062  |
| 1 | -3.90279 |
| 1 | -3.97843 |
| 0 | 3.93283  |
| 0 | 4.2071   |
| 0 | 3.78951  |
| 0 | 4.04218  |
| 0 | 4.13133  |
| 0 | 4.29927  |
| 0 | 4.07465  |
| 0 | 4.20499  |
| 0 | 3.99731  |
| 0 | 3.81326  |
| 0 | 3.81326  |
| 0 | 4.05556  |
| 0 | 3.93076  |
| 0 | 3.93076  |
| 0 | 3.84739  |
| 1 | -3.59214 |
| 0 | 3.74141  |
| 1 | -3.6114  |
| 1 | -4.02347 |
| 0 | 4.30489  |
| 0 | 4.0383   |
| 0 | 4.0383   |
| 0 | 3.78132  |
| 0 | 4.08774  |
| 1 | -3.69649 |
| 0 | 4.22839  |

|   |          |
|---|----------|
| 1 | -3.70728 |
| 0 | 3.89368  |
| 0 | 3.754    |
| 0 | 3.85938  |
| 1 | -3.68021 |
| 0 | 3.71734  |
| 0 | 4.09813  |
| 0 | 4.08776  |
| 1 | -3.69662 |
| 1 | -3.5903  |
| 1 | -3.8752  |
| 0 | 4.0688   |
| 0 | 4.19065  |
| 0 | 3.76683  |
| 0 | 4.11965  |
| 0 | 3.82768  |
| 0 | 3.75207  |
| 0 | 3.88403  |
| 0 | 3.88403  |
| 0 | 4.0951   |
| 0 | 4.03808  |
| 1 | -3.69276 |
| 0 | 3.96356  |
| 0 | 3.75203  |
| 0 | 3.84991  |
| 0 | 4.06335  |
| 0 | 4.06335  |
| 0 | 3.77759  |
| 0 | 4.05271  |
| 0 | 3.7434   |
| 0 | 3.85477  |
| 0 | 4.00425  |
| 1 | -3.57352 |
| 0 | 4.11935  |
| 0 | 3.89218  |
| 0 | 3.72713  |
| 0 | 3.75992  |
| 0 | 3.81763  |
| 0 | 3.80707  |
| 0 | 3.93356  |
| 0 | 4.19231  |
| 0 | 4.19231  |
| 0 | 4.21297  |
| 0 | 3.83793  |
| 0 | 3.83793  |
| 1 | -3.81146 |
| 0 | 4.09783  |

|   |          |
|---|----------|
| 0 | 4.31395  |
| 0 | 3.74638  |
| 0 | 3.74638  |
| 0 | 3.88997  |
| 0 | 4.12951  |
| 0 | 4.16985  |
| 1 | -3.77502 |
| 1 | -3.58087 |
| 0 | 4.11448  |
| 0 | 4.11322  |
| 0 | 3.78727  |
| 0 | 3.78727  |
| 0 | 4.10466  |
| 0 | 4.10466  |
| 0 | 3.76951  |
| 0 | 3.76951  |
| 0 | 4.00696  |
| 1 | -3.61706 |
| 0 | 4.00746  |
| 0 | 4.2279   |
| 0 | 4.03706  |
| 0 | 4.02189  |
| 0 | 4.01128  |
| 0 | 3.72987  |
| 0 | 4.01329  |
| 0 | 3.76419  |
| 0 | 3.71346  |
| 0 | 4.23881  |
| 1 | -3.75255 |
| 0 | 3.79681  |
| 0 | 4.09298  |
| 0 | 4.05694  |
| 0 | 4.03482  |
| 0 | 4.2983   |
| 1 | -3.84792 |
| 1 | -3.84792 |
| 1 | -3.67214 |
| 1 | -3.58611 |
| 1 | -3.60165 |
| 0 | 3.88442  |
| 0 | 3.88442  |
| 0 | 3.97702  |
| 0 | 3.91531  |
| 0 | 4.02171  |
| 0 | 3.83614  |
| 1 | -3.61122 |
| 0 | 4.12539  |



|   |          |
|---|----------|
| 0 | 4.12539  |
| 0 | 4.30538  |
| 1 | -3.91047 |
| 0 | 3.79712  |
| 1 | -3.66569 |
| 0 | 3.78308  |
| 0 | 3.9435   |
| 0 | 3.76595  |
| 0 | 3.76595  |
| 0 | 4.26592  |
| 1 | -3.608   |
| 1 | -3.608   |
| 0 | 4.11799  |
| 1 | -3.7431  |
| 0 | 4.07013  |
| 0 | 4.07013  |
| 1 | -3.90789 |
| 0 | 3.90472  |
| 0 | 4.20267  |
| 0 | 4.32193  |
| 1 | -3.64275 |
| 0 | 3.78268  |
| 1 | -3.61985 |
| 1 | -3.75759 |
| 1 | -3.62953 |
| 1 | -4.01306 |
| 1 | -3.68813 |
| 1 | -3.65926 |
| 0 | 3.71152  |
| 0 | 3.71152  |
| 0 | 3.79022  |
| 1 | -3.66615 |
| 0 | 3.73649  |
| 0 | 3.87576  |
| 1 | -3.80488 |
| 0 | 4.2104   |
| 1 | -3.78824 |
| 0 | 3.72453  |
| 1 | -3.5847  |
| 1 | -3.65409 |
| 0 | 3.79697  |
| 0 | 4.13941  |
| 1 | -3.79252 |
| 0 | 3.79714  |
| 0 | 3.79714  |
| 0 | 4.23824  |
| 1 | -3.76836 |

|   |          |
|---|----------|
| 1 | -3.62181 |
| 0 | 3.75691  |
| 0 | 3.75691  |
| 0 | 3.79988  |
| 0 | 3.79988  |
| 0 | 4.11031  |
| 0 | 4.11031  |
| 0 | 3.91277  |
| 1 | -3.60279 |
| 0 | 4.00897  |
| 0 | 4.00897  |
| 0 | 4.15165  |
| 1 | -3.63717 |
| 1 | -3.59294 |
| 1 | -3.64191 |
| 1 | -3.92196 |
| 1 | -3.65284 |
| 0 | 4.29463  |
| 0 | 4.29463  |
| 0 | 3.77932  |
| 0 | 3.71923  |
| 0 | 3.71923  |
| 0 | 4.24001  |
| 0 | 4.20336  |
| 0 | 3.76201  |
| 0 | 3.73289  |
| 0 | 3.73289  |
| 0 | 3.72526  |
| 1 | -3.74025 |
| 1 | -4.01774 |
| 0 | 3.82382  |
| 1 | -4.00456 |
| 0 | 3.95082  |
| 0 | 3.78503  |
| 1 | -3.68163 |
| 0 | 3.80925  |
| 1 | -3.66643 |
| 0 | 3.80432  |
| 0 | 3.75823  |
| 1 | -3.68093 |
| 1 | -3.68093 |
| 0 | 4.25136  |
| 0 | 4.03397  |
| 1 | -3.69957 |
| 0 | 4.31352  |
| 0 | 3.75516  |
| 0 | 4.08919  |

|   |          |
|---|----------|
| 0 | 4.08951  |
| 0 | 4.0593   |
| 0 | 4.0593   |
| 1 | -3.70512 |
| 0 | 4.14246  |
| 1 | -3.58036 |
| 0 | 3.76382  |
| 0 | 4.01384  |
| 0 | 3.73312  |
| 0 | 3.73312  |
| 1 | -3.63528 |
| 0 | 4.19274  |
| 1 | -3.59304 |
| 1 | -3.62788 |
| 1 | -3.93647 |
| 1 | -3.67177 |
| 1 | -3.59949 |
| 1 | -3.78066 |
| 0 | 4.07381  |
| 1 | -3.70627 |
| 1 | -3.64788 |
| 1 | -3.66889 |
| 1 | -4.02079 |
| 1 | -3.69284 |
| 1 | -3.93487 |
| 1 | -3.65092 |
| 1 | -4.01152 |
| 1 | -3.60718 |
| 1 | -3.73939 |
| 0 | 4.23245  |
| 1 | -3.60342 |
| 0 | 3.92825  |
| 1 | -3.62042 |
| 0 | 3.78044  |
| 1 | -3.90224 |
| 0 | 3.94846  |
| 0 | 3.86774  |
| 0 | 4.31024  |
| 0 | 4.33742  |
| 0 | 4.33742  |
| 0 | 4.2288   |
| 0 | 4.2288   |
| 1 | -3.66172 |
| 0 | 4.01951  |
| 0 | 3.74869  |
| 0 | 4.22268  |
| 1 | -3.8664  |

|   |          |
|---|----------|
| 0 | 3.73061  |
| 0 | 3.72529  |
| 0 | 3.72529  |
| 0 | 4.18505  |
| 1 | -3.61493 |
| 0 | 3.89917  |
| 0 | 3.83951  |
| 1 | -3.7929  |
| 1 | -3.59876 |
| 1 | -3.59876 |
| 1 | -3.63779 |
| 1 | -3.80203 |
| 0 | 4.28436  |
| 1 | -3.72477 |
| 1 | -3.61336 |
| 1 | -3.78445 |
| 1 | -3.84476 |
| 0 | 4.13139  |
| 1 | -3.59036 |
| 0 | 4.21306  |
| 1 | -3.70805 |
| 1 | -3.64662 |
| 0 | 4.19059  |
| 0 | 4.02229  |
| 0 | 4.14308  |
| 0 | 3.98491  |
| 1 | -4.01041 |
| 0 | 4.15169  |
| 1 | -3.71252 |
| 0 | 4.02461  |
| 0 | 4.03109  |
| 0 | 3.93102  |
| 0 | 4.02751  |
| 1 | -3.60144 |
| 1 | -3.68905 |
| 1 | -3.68905 |
| 1 | -3.72951 |
| 1 | -3.58345 |
| 1 | -4.019   |
| 0 | 3.78551  |
| 0 | 4.05357  |
| 1 | -3.63973 |
| 0 | 3.90925  |
| 0 | 3.84322  |
| 0 | 3.84322  |
| 1 | -3.6438  |
| 1 | -3.59138 |

|   |          |
|---|----------|
| 1 | -3.77128 |
| 1 | -3.6047  |
| 1 | -3.62313 |
| 1 | -3.62288 |
| 1 | -4.02263 |
| 1 | -3.64129 |
| 1 | -3.75883 |
| 1 | -3.94669 |
| 0 | 3.85488  |
| 1 | -3.90151 |
| 1 | -3.70097 |
| 1 | -3.70097 |
| 1 | -3.81853 |
| 1 | -3.69908 |
| 1 | -3.61742 |
| 0 | 4.04922  |
| 0 | 4.02682  |
| 0 | 3.71583  |
| 0 | 4.25597  |
| 0 | 4.25597  |
| 1 | -3.58326 |
| 1 | -3.95922 |
| 1 | -3.58717 |
| 1 | -4.00651 |
| 0 | 3.95841  |
| 0 | 4.01436  |
| 0 | 4.13791  |
| 0 | 3.78202  |
| 1 | -3.61388 |
| 0 | 3.81666  |
| 1 | -3.59125 |
| 0 | 4.00346  |
| 1 | -3.59004 |
| 1 | -3.65649 |
| 1 | -3.88994 |
| 0 | 3.77528  |
| 1 | -4.00138 |
| 0 | 3.8425   |
| 0 | 4.01469  |
| 0 | 3.78303  |
| 1 | -3.62389 |
| 1 | -3.80558 |
| 1 | -3.76648 |
| 0 | 3.76252  |
| 0 | 3.9712   |
| 1 | -3.58752 |
| 0 | 4.03852  |

|   |          |
|---|----------|
| 1 | -3.57415 |
| 1 | -3.78806 |
| 0 | 3.85348  |
| 1 | -3.65195 |
| 0 | 4.0864   |
| 0 | 3.76087  |
| 0 | 3.93025  |
| 0 | 4.136    |
| 0 | 4.01625  |
| 0 | 4.13557  |
| 0 | 4.13557  |
| 0 | 4.00556  |
| 0 | 4.02244  |
| 0 | 3.75992  |
| 0 | 4.06244  |
| 0 | 4.2731   |
| 0 | 4.13523  |
| 1 | -3.70799 |
| 1 | -3.82907 |
| 1 | -3.68502 |
| 1 | -3.73853 |
| 1 | -3.65042 |
| 1 | -3.69689 |
| 0 | 4.19528  |
| 0 | 3.72828  |
| 0 | 4.19914  |
| 1 | -4.00247 |
| 1 | -3.65855 |
| 1 | -3.59937 |
| 1 | -3.60454 |
| 1 | -3.7306  |
| 1 | -3.62111 |
| 1 | -3.62111 |
| 0 | 4.00111  |
| 0 | 4.08933  |
| 0 | 4.10986  |
| 0 | 4.02641  |
| 0 | 4.24521  |
| 0 | 3.82725  |
| 1 | -4.00487 |
| 0 | 3.96599  |
| 0 | 3.71107  |
| 0 | 3.71107  |
| 0 | 3.71447  |
| 0 | 3.71266  |
| 0 | 4.17746  |
| 0 | 3.94508  |

|   |          |
|---|----------|
| 1 | -3.79482 |
| 1 | -3.80499 |
| 1 | -3.62058 |
| 1 | -3.62058 |
| 1 | -3.57478 |
| 1 | -3.6043  |
| 1 | -3.66739 |
| 1 | -4.02532 |
| 1 | -3.61637 |
| 0 | 3.72249  |
| 0 | 3.71605  |
| 1 | -3.69626 |
| 0 | 4.33739  |
| 0 | 4.3154   |
| 0 | 4.08108  |
| 0 | 4.02224  |
| 0 | 4.08104  |
| 0 | 3.74792  |
| 0 | 3.7944   |
| 0 | 3.86743  |
| 0 | 4.1742   |
| 0 | 4.24316  |
| 0 | 3.8464   |
| 0 | 3.74482  |
| 0 | 4.07807  |
| 0 | 3.73281  |
| 0 | 3.78508  |
| 0 | 3.83883  |
| 1 | -3.59576 |
| 0 | 4.08541  |
| 1 | -3.60309 |
| 0 | 4.3338   |
| 1 | -3.69915 |
| 0 | 4.11286  |
| 1 | -3.58154 |
| 0 | 3.76184  |
| 1 | -4.00366 |
| 0 | 4.00359  |
| 1 | -3.73841 |
| 0 | 4.1616   |
| 0 | 4.15951  |
| 0 | 3.82889  |
| 1 | -3.71257 |
| 1 | -3.64306 |
| 1 | -3.74429 |
| 0 | 4.01188  |
| 0 | 4.13603  |

|   |          |
|---|----------|
| 0 | 3.71827  |
| 1 | -3.64174 |
| 1 | -3.59219 |
| 1 | -3.64292 |
| 0 | 4.20724  |
| 0 | 4.05521  |
| 1 | -3.63392 |
| 0 | 3.86104  |
| 0 | 3.92601  |
| 0 | 4.15107  |
| 0 | 4.15107  |
| 0 | 4.33663  |
| 1 | -3.6369  |
| 0 | 3.81746  |
| 0 | 3.93912  |
| 0 | 3.93912  |
| 1 | -3.5748  |
| 0 | 4.0593   |
| 0 | 4.21605  |
| 0 | 3.88738  |
| 0 | 3.74018  |
| 0 | 3.85279  |
| 0 | 3.74013  |
| 0 | 3.74013  |
| 0 | 3.87526  |
| 0 | 3.87526  |
| 0 | 3.80302  |
| 0 | 4.05935  |
| 0 | 4.05257  |
| 1 | -3.68116 |
| 0 | 4.05278  |
| 0 | 4.05278  |
| 0 | 3.73371  |
| 0 | 3.74454  |
| 0 | 4.03309  |
| 0 | 4.23413  |
| 1 | -3.76386 |
| 0 | 3.75225  |
| 0 | 3.736    |
| 0 | 3.72758  |
| 0 | 3.82797  |
| 1 | -3.64626 |
| 0 | 4.04785  |
| 0 | 3.77639  |
| 0 | 3.77641  |
| 1 | -3.62299 |
| 0 | 3.79057  |



|   |          |
|---|----------|
| 0 | 3.76852  |
| 0 | 4.09847  |
| 0 | 3.72608  |
| 0 | 4.05335  |
| 1 | -3.71007 |
| 0 | 4.10796  |
| 0 | 4.10796  |
| 0 | 4.02466  |
| 0 | 4.0948   |
| 0 | 3.77804  |
| 1 | -3.77158 |
| 0 | 3.76505  |
| 1 | -3.61925 |
| 1 | -3.6343  |
| 0 | 3.81165  |
| 0 | 3.99487  |
| 1 | -3.75845 |
| 1 | -4.00717 |
| 1 | -3.57271 |
| 0 | 4.18209  |
| 1 | -3.96154 |
| 0 | 3.73181  |
| 1 | -3.60131 |
| 1 | -3.60131 |
| 1 | -3.77529 |
| 1 | -3.77529 |
| 1 | -3.72185 |
| 0 | 3.81866  |
| 1 | -3.83872 |
| 1 | -3.63558 |
| 0 | 3.89033  |
| 0 | 4.16459  |
| 1 | -3.6002  |
| 0 | 4.15135  |
| 0 | 4.00057  |
| 1 | -3.59937 |
| 0 | 3.84999  |
| 1 | -3.79561 |
| 1 | -3.75361 |

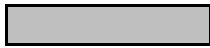

**WT H3K14ac**

1

2

3

4

5

**WT H3K9me3**

1

2

3

4

5

**HET H3K14ac**

1

2

3

4

5

**HET H3K9me3**

1

2

3

4

5

ACCEPTED MANUSCRIPT

**Top Networks**

Lipid Metabolism, Molecular Transport, Small Molecule Biochemistry  
Cancer, Immunological Disease, Drug Metabolism  
Reproductive System Disease, Cell Death, Cell-To-Cell Signaling and Interaction  
Lipid Metabolism, Molecular Transport, Small Molecule Biochemistry  
Inflammatory Response, Renal and Urological Disease, Cellular Movement

Lipid Metabolism, Small Molecule Biochemistry, Energy Production  
Embryonic Development, Organ Development, Organismal Development  
Lipid Metabolism, Molecular Transport, Small Molecule Biochemistry  
Lipid Metabolism, Small Molecule Biochemistry, Vitamin and Mineral Metabolism  
Lipid Metabolism, Small Molecule Biochemistry, Vitamin and Mineral Metabolism

Lipid Metabolism, Small Molecule Biochemistry, Molecular Transport  
Cellular Movement, Hematological System Development and Function, Immune Cell Trafficking  
Cell Cycle, Gene Expression, Cellular Movement  
Cardiovascular System Development and Function, Organismal Development, Tissue Development  
Lipid Metabolism, Small Molecule Biochemistry, Vitamin and Mineral Metabolism

Lipid Metabolism, Small Molecule Biochemistry, Vitamin and Mineral Metabolism  
Lipid Metabolism, Small Molecule Biochemistry, Vitamin and Mineral Metabolism  
Cell Morphology, Cellular Growth and Proliferation, Connective Tissue Development and Function  
Carbohydrate Metabolism, Gene Expression, Gastrointestinal Disease  
Lipid Metabolism, Molecular Transport, Small Molecule Biochemistry

| number |
|--------|
|--------|

|    |
|----|
| 14 |
|----|

|   |
|---|
| 2 |
|---|

|   |
|---|
| 2 |
|---|

|   |
|---|
| 1 |
|---|

|   |
|---|
| 1 |
|---|

|    |
|----|
| 33 |
|----|

|    |
|----|
| 11 |
|----|

|   |
|---|
| 8 |
|---|

|   |
|---|
| 7 |
|---|

|   |
|---|
| 4 |
|---|

|    |
|----|
| 26 |
|----|

|   |
|---|
| 9 |
|---|

|   |
|---|
| 9 |
|---|

|   |
|---|
| 7 |
|---|

|   |
|---|
| 5 |
|---|

|    |
|----|
| 28 |
|----|

|    |
|----|
| 10 |
|----|

|   |
|---|
| 6 |
|---|

|   |
|---|
| 5 |
|---|

|   |
|---|
| 5 |
|---|

ACCEPTED MANUSCRIPT

## Primers used for CHIP-qPCR

|                                        |                      |
|----------------------------------------|----------------------|
| <b>PPAR<math>\gamma</math> Forward</b> | TTATTCCCACCTCTCCCAA  |
| <b>PPAR<math>\gamma</math> Reverse</b> | ATGCTCTGGGTCAACAGGAG |
| <b>PPAR<math>\alpha</math> Forward</b> | AGAGGGCACACGCTAGGAAG |
| <b>PPAR<math>\alpha</math> Reverse</b> | AAACAGCTGCGAACACCAAT |
| <b>RXRA Forward</b>                    | CTGATGCAGGCACTACCAGA |
| <b>RXRA Reverse</b>                    | AATGCCTTGGGTTGCACTAC |
| <b>RORA Forward</b>                    | AACCGGATTTGTCTCCTCCT |
| <b>RORA Reverse</b>                    | CCCAGCTACAGAAAGGATCG |

| Molecule Name | Entrez Gene for Mouse                                                   |
|---------------|-------------------------------------------------------------------------|
| AKT1S1        | 67605                                                                   |
| Amd1          | 100041585 100043304 11702                                               |
| Aph1a         | 226548                                                                  |
| ARHGAP23      | 58996                                                                   |
| ARHGAP24      | 231532                                                                  |
| ARMCX6        | 278097                                                                  |
| ASPDH         | 68352                                                                   |
| BCL9          | 77578                                                                   |
| BCL9L         | 80288                                                                   |
| CASK          | 12361                                                                   |
| CLDN2         | 12738                                                                   |
| DXBay18       | 574405                                                                  |
| EFNA2         | 13637                                                                   |
| EIF4A1        | 13681                                                                   |
| FOXP3         | 20371                                                                   |
| Gm4981        | 245263                                                                  |
| Klra4         | 16638 16640 16634 16628<br>16630 16627 16637 16635<br>16636 16639 16631 |
| KRTAP1-5      | 629873                                                                  |
| LOC728307     | 546325 574404 434795 434797                                             |
| MAGEE2        | 272790                                                                  |
| MBNL3         | 171170                                                                  |
| MID1          | 17318                                                                   |
| MID2          | 23947                                                                   |
| NRIP1         | 268903                                                                  |
| PCDHAC2       | 353237                                                                  |
| PCDHB10       | 93889                                                                   |
| PCDHB15       | 93893                                                                   |
| PCDHGA3       | 93711                                                                   |
| RHOBTB1       | 69288                                                                   |
| Rhox4b        | 434759 664610 57737 194856<br>664609 664608 636177                      |
| RLIM          | 19820                                                                   |
| RPL36A        | 19982 66483 100040331                                                   |
| SFI1          | 78887                                                                   |
| SLC25A10      | 27376                                                                   |
| SNRNP48       | 67797                                                                   |
| SPRR2A        | 20765 20756 20755 20758<br>20762 20760 20759                            |
| TBC1D22B      | 381085                                                                  |
| UBE2O         | 217342                                                                  |
| USP20         | 74270                                                                   |

|                 |                                                                                                                                                                                                                                                       |
|-----------------|-------------------------------------------------------------------------------------------------------------------------------------------------------------------------------------------------------------------------------------------------------|
| <b>VILL</b>     | 22351                                                                                                                                                                                                                                                 |
| <b>Vmn1r188</b> | 171259 171277 632793 171251 252908 171269 171246 252906<br>171279 252912 171255 432736 171254 171257 171258 171250<br>171270 171271 171253 171256 252907 171274 432735 171252<br>171247 171275 626299 171248 171249 171278 171273 171272<br>100036518 |
| <b>Xlr3c</b>    | 22446 22445 574437                                                                                                                                                                                                                                    |
| <b>Xlr4a</b>    | 434794 667387 27083 72891                                                                                                                                                                                                                             |
| <b>Xlr5a</b>    | 27084 574438 627081                                                                                                                                                                                                                                   |
| <b>ZDHHC15</b>  | 108672                                                                                                                                                                                                                                                |
